# Supplementary material for: May the Phage be With You? Prophage-Like Elements in the Genomes of Soft Rot Pectobacteriaceae: Pectobacterium spp. and Dickeya spp
Source: Front Microbiol. 2019 Feb 14;10:138. doi: 10.3389/fmicb.2019.00138 (PMC6385640; doi:10.3389/fmicb.2019.00138)
Supplement: Supplementary file 2 [file Data_Sheet_2.ZIP]

Archive with 38 entries (37 files):
- Supplementary_prophagesGENBANK_files/Genbank FILES _SRP_prophages/
- Supplementary_prophagesGENBANK_files/Genbank FILES _SRP_prophages/phiD1.gb
- Supplementary_prophagesGENBANK_files/Genbank FILES _SRP_prophages/phiD2.gb
- Supplementary_prophagesGENBANK_files/Genbank FILES _SRP_prophages/phiD3.gb
- Supplementary_prophagesGENBANK_files/Genbank FILES _SRP_prophages/phiD4.gb
- Supplementary_prophagesGENBANK_files/Genbank FILES _SRP_prophages/phiD5.gb
- Supplementary_prophagesGENBANK_files/Genbank FILES _SRP_prophages/phiD6.gb
- Supplementary_prophagesGENBANK_files/Genbank FILES _SRP_prophages/phiDch1.gb
- Supplementary_prophagesGENBANK_files/Genbank FILES _SRP_prophages/phiDda1.gb
- Supplementary_prophagesGENBANK_files/Genbank FILES _SRP_prophages/phiDda2.gb
- Supplementary_prophagesGENBANK_files/Genbank FILES _SRP_prophages/phiDda3.gb
- Supplementary_prophagesGENBANK_files/Genbank FILES _SRP_prophages/phiDda4.gb
- Supplementary_prophagesGENBANK_files/Genbank FILES _SRP_prophages/phiDda6.gb
- Supplementary_prophagesGENBANK_files/Genbank FILES _SRP_prophages/phiDdd1.gb
- Supplementary_prophagesGENBANK_files/Genbank FILES _SRP_prophages/phiDdd2.gb
- Supplementary_prophagesGENBANK_files/Genbank FILES _SRP_prophages/phiDdi1.gb
- Supplementary_prophagesGENBANK_files/Genbank FILES _SRP_prophages/phiDdi3.gb
- Supplementary_prophagesGENBANK_files/Genbank FILES _SRP_prophages/phiDdi5.gb
- Supplementary_prophagesGENBANK_files/Genbank FILES _SRP_prophages/phiDdi6.gb
- Supplementary_prophagesGENBANK_files/Genbank FILES _SRP_prophages/phiDpa1.gb
- Supplementary_prophagesGENBANK_files/Genbank FILES _SRP_prophages/phiDpa2.gb
- Supplementary_prophagesGENBANK_files/Genbank FILES _SRP_prophages/phiDso1.gb
- Supplementary_prophagesGENBANK_files/Genbank FILES _SRP_prophages/phiDze1.gb
- Supplementary_prophagesGENBANK_files/Genbank FILES _SRP_prophages/phiDze2.gb
- Supplementary_prophagesGENBANK_files/Genbank FILES _SRP_prophages/phiDze3.gb
- Supplementary_prophagesGENBANK_files/Genbank FILES _SRP_prophages/phiDze4.gb
- Supplementary_prophagesGENBANK_files/Genbank FILES _SRP_prophages/phiDze5.gb
- Supplementary_prophagesGENBANK_files/Genbank FILES _SRP_prophages/phiDze6.gb
- Supplementary_prophagesGENBANK_files/Genbank FILES _SRP_prophages/phiPa1.gb
- Supplementary_prophagesGENBANK_files/Genbank FILES _SRP_prophages/phiPa2.gb
- Supplementary_prophagesGENBANK_files/Genbank FILES _SRP_prophages/phiPa3.gb
- Supplementary_prophagesGENBANK_files/Genbank FILES _SRP_prophages/phiPc1.gb
- Supplementary_prophagesGENBANK_files/Genbank FILES _SRP_prophages/phiPc2.gb
- Supplementary_prophagesGENBANK_files/Genbank FILES _SRP_prophages/phiPcc1.gb
- Supplementary_prophagesGENBANK_files/Genbank FILES _SRP_prophages/phiPcc2.gb
- Supplementary_prophagesGENBANK_files/Genbank FILES _SRP_prophages/phiPpa1.gb
- Supplementary_prophagesGENBANK_files/Genbank FILES _SRP_prophages/phiPwa1.gb
- Supplementary_prophagesGENBANK_files/Genbank FILES _SRP_prophages/phiPwa2.gb
