# Supplementary material for: May the Phage be With You? Prophage-Like Elements in the Genomes of Soft Rot Pectobacteriaceae: Pectobacterium spp. and Dickeya spp
Source: Front Microbiol. 2019 Feb 14;10:138. doi: 10.3389/fmicb.2019.00138 (PMC6385640; doi:10.3389/fmicb.2019.00138)
Supplement: Supplementary file 2 [file Data_Sheet_2.ZIP › Supplementary_prophagesGENBANK_files/Genbank FILES _SRP_prophages/phiD1.gb]

LOCUS       Exported               53474 bp ds-DNA     linear   UNK 02-AUG-2018
DEFINITION  phiD1.
ACCESSION   .
VERSION     .
KEYWORDS    .
SOURCE      phiD1
  ORGANISM  phiD1
REFERENCE   1  (bases 1 to 53474)
  AUTHORS   .
  TITLE     Direct Submission
  JOURNAL   Exported Aug 2, 2018 from SnapGene Viewer 4.2.3
            http://www.snapgene.com
FEATURES             Location/Qualifiers
     source          1..53474
                     /organism="prophage phiD1"
                     /mol_type="genomic DNA"
                     /note="/genome_id=6666666.357098"
                     /note="/genome_md5="
                     /note="/project=robertczajkowski_6666666"
                     /db_xref="taxon:6666666"
     CDS             complement(74..1153)
                     /codon_start=1
                     /product="Phage integrase"
                     /label=Phage integrase
                     /db_xref="SEED:fig|6666666.357098.peg.1"
                     /translation="MVSEINLGEFDYQKRFPNSKKLKDCDTRKISTFGELANVWLKVRE
                     IELTANTLRKTGSQINTLLKIIGTDTKINSINQNDILAYRYQLLHGETYYSESVRSNKQ
                     GRTVRTVDNYISLLCSLLRFAYRSDLITGRPFEGIKKLQKSRPRPDPLLKHEFEQLISH
                     LSGQARNLWQLAVYTGMRHGELCALAWEDIDLDAGVIHVSRNLTTLGHFGPPKTRAGVR
                     TISLLSHAIEALSAQKDITGYRQQQKIIYHHREYGLTETQNLIFVFQPRKQKGKEKNYS
                     LSSIGQSWNAAVKLSGIRRRNPYHTRHTYACWLLSAGANPSFIANQMGHENAQMVFEIY
                     GRWIEEMSGDQVNMLNQRL"
     CDS             complement(1314..1532)
                     /codon_start=1
                     /product="ydaQ protein"
                     /label=ydaQ protein
                     /db_xref="SEED:fig|6666666.357098.peg.2"
                     /translation="MTKNNIVFNHEWIVEDALKDLTGLDERQIERYRQGCWIEGVHFKR
                     VSPSGEKTQRGITWYNHPAINQLIQEA"
     CDS             complement(1613..2089)
                     /codon_start=1
                     /product="Phage protein"
                     /label=Phage protein
                     /db_xref="SEED:fig|6666666.357098.peg.3"
                     /translation="MPQSWSVPFPESKTEHNGYPVYWRYFETVQAAGIEVIAEQYIAFH
                     QTNSYAFLCPAHWAKDYDIDRDKARWLDGWKKKYMRYAIKKVARSAERSFAFPSQQLAL
                     ESLLRRKRYHLMRLKQDIAIITTVVEEMAKLDFSSAQIEYNLGHNAETENWIFY"
     CDS             complement(2177..2437)
                     /codon_start=1
                     /product="hypothetical protein"
                     /label=hypothetical protein
                     /db_xref="SEED:fig|6666666.357098.peg.4"
                     /translation="MMPKGGGPAFPVETQFNPISMQAGMHQTGDNYLYQFTGMTLRDYF
                     AAKAMQAWLSQIAPEEMEDMMNRWADNSYEMADAMLKAREV"
     CDS             complement(2471..2650)
                     /codon_start=1
                     /product="hypothetical protein"
                     /label=hypothetical protein
                     /db_xref="SEED:fig|6666666.357098.peg.5"
                     /translation="MTDLTKTIIVTLELDIPASAAEEDISGFVDVEFAQCNSMKLDNPC
                     RDNFEIVGHSWRAE"
     CDS             complement(2647..2784)
                     /codon_start=1
                     /product="hypothetical protein"
                     /label=hypothetical protein
                     /db_xref="SEED:fig|6666666.357098.peg.6"
                     /translation="MFKWNETQIPIREVLALTDQKPAFGHLSGKRSNTHWVCFIKGEKE
                     "
     CDS             2914..3093
                     /codon_start=1
                     /product="hypothetical protein"
                     /label=hypothetical protein
                     /db_xref="SEED:fig|6666666.357098.peg.7"
                     /translation="MGRVKNDQSKLRIVEGEGAEVGDNIGIYLQAAAIAKGVLLPANVC
                     EYCPGIVAIKPEHP"
     CDS             complement(3139..3489)
                     /codon_start=1
                     /product="hypothetical protein"
                     /label=hypothetical protein
                     /db_xref="SEED:fig|6666666.357098.peg.8"
                     /translation="MSKSLIKRCQRRWRIRLKPWGDSKISPYWCKADIKPFARENGKIT
                     ADCLVAEMAENNAKADFAGQGNPYGWTPEFSRYFDENRERYTKEALHFLTGEITIEEID
                     DSIDAEIDCWEP"
     CDS             3446..3655
                     /codon_start=1
                     /product="hypothetical protein"
                     /label=hypothetical protein
                     /db_xref="SEED:fig|6666666.357098.peg.9"
                     /translation="MRQRRWQRFIRDLLIVFAPCRHDGINGQALVFSGQFLRPDIRLAI
                     FPIWIYPALRLVLARLECVTDKKK"
     CDS             complement(3739..4554)
                     /codon_start=1
                     /product="hypothetical protein"
                     /label=hypothetical protein
                     /db_xref="SEED:fig|6666666.357098.peg.10"
                     /translation="MTHITEAAPSVNATSLAMAINDHCRQFEASEEFRDMIHKHVRALY
                     EKTIEDTFRWGRFPDAVKKALEEALPGNITEIADLPRYNLLLARALDEQWKTNEVSERL
                     VMQMQELVKDFIEQDQLPKFIKASDLWRAYVEQYQEEAEQEGWERPQVVVNDDRDGFFY
                     IGFEKEPASERSYRYQSKEQKEKAHQCEVYLGFHQKTVRDGRNNNPVMHEGSPVYSLFN
                     GKLEFNDALGKKPVQFRSTFEKMVGALYYGDSLLVLDDEADDINYPNDY"
     CDS             complement(4660..4779)
                     /codon_start=1
                     /product="hypothetical protein"
                     /label=hypothetical protein
                     /db_xref="SEED:fig|6666666.357098.peg.11"
                     /translation="MKRFFSIAGAFDAGFAIGFALGLLVAKFAIEYDYLWLNL"
     CDS             complement(4780..5193)
                     /codon_start=1
                     /product="hypothetical protein"
                     /label=hypothetical protein
                     /db_xref="SEED:fig|6666666.357098.peg.12"
                     /translation="MEELHLGVLYKPEDDRCNWLNVIIHRMRARSSIRLGEPYKPEPKP
                     IYTGNTFTRMPSPMPRIGARRYYSSTIMLAVYQLHRLGINENMIAKDTGIPVGDVRKLL
                     AQKTQTQRKQWQRAHQLPLPSKSVILGRLGKEF"
     CDS             complement(5195..6334)
                     /codon_start=1
                     /product="Phage protein"
                     /label=Phage protein
                     /db_xref="SEED:fig|6666666.357098.peg.13"
                     /translation="MTTTTTVADVLESSLRPVRAQLDLATSQTTGMAQRSIESAAILLN
                     QAQALCIEQINQETDEYNALLDRLETTGSALTTKELALKQIQERIETAELSAAEAMAER
                     DSITARYKLALTDNAMLANERNQLKSLNPERMKSQLVRLKEELADSRKLRDQQLTEIRR
                     LKKELADKTSRLSGMVQLNDELNRHLVDVQARLRRADGDVAPRYWQASNGVRFYFYTFQ
                     WGLELRSPEYDVTILNGIDWHLEIRSTIGICMIVSVTDWAVPMYPIIESFKDAWPEGLN
                     EAVTARIRELLEETHPHLVRRAEWAESVLSGTLPLKEQYLDLLSAAGIYSLFDIVRRTP
                     EMLADKVKGFGLATARQVHAKCMGLVKDWEQAQKRSEAA"
     CDS             complement(6354..8018)
                     /codon_start=1
                     /product="putative terminase"
                     /label=Putative terminase
                     /db_xref="SEED:fig|6666666.357098.peg.14"
                     /translation="MKIHHLVQGTDEWAAFRLTHHGASEAAAMLGLSKKVARSELLRIK
                     HTGTPKAFTDWVKKNILDYGHEVEALARPLVEKIIGDDLYPVTCSDEDGGGKLSASCDG
                     LTLLEDTAFEHKQWNTDLAASVSNNVLPDDHMPQCQQIMLVTGAQRVIFTVSDGTPERL
                     VWMEVLPDANWFERIRAGWAQFDRDLAEYTLPTPAPTVVAEAVQDLPAVTVQVNGQIEV
                     RENFTIFEVALRDFIENKLIREPQTDQDFADLDLQIKAMKKAEETLNAAESMMLAQIQR
                     VDEAKRQKDMLSRLVRDNRLMAEKLLASEKERRRTEKVVAARQAFADHVTELQREISGV
                     RLDIVVPDFAGAIKGLKTMTSIQDKLDTALANGKIAADQQAADLRTKLAWLDTNAADYR
                     ALLADLQQLVAKPFDDFKLAVTARIDAHKKAEEARLEAERERIRREEAARLEAEQRQQK
                     EPPSETESTTIMAPSAPCRIAMSSSKQIEPDETPALRLGQINDRLAPVSLTVDGLARLG
                     IMHAATDKSAKLYHERDFSRICTALLQHIQSVQANAN"
     CDS             complement(8015..9073)
                     /codon_start=1
                     /product="hypothetical protein"
                     /label=hypothetical protein
                     /db_xref="SEED:fig|6666666.357098.peg.15"
                     /translation="MTFTDSQALTVRQDFGGVSNTLAAPETSATAVAAQAKAMVEARYI
                     MALRRPRQWDQVRQDLLKECRRPSFANNKSAYYRKPIGNGVEGLGIRFVEVALRCMTNV
                     LVETSMIFEDDHKEIHRVSVTDLESNLTYPLDVRVTKTVERSKPCDDGSYISVRKNSYN
                     KNVYTVPATDDDLLNKRSAQISKAIRTLGLRIIPGDLQDEAESIIKAIRLDEAARDPDT
                     ERKRIADAFAEIGVKASELTEFLGHSIDTCSPSELVNLRGIYGAIRDGEASWKSVMENK
                     AEQAHSTTSSANALPICSDAAFEKKKAGWRKAIDGGKAADDLIAMIQTKEQLTDAQRME
                     IASWVNNGSDRQ"
     CDS             complement(9087..9233)
                     /codon_start=1
                     /product="hypothetical protein"
                     /label=hypothetical protein
                     /db_xref="SEED:fig|6666666.357098.peg.16"
                     /translation="MTTRYVKHIQYRHGIGSHNIHHHPQQKNGVMFPLIIVLAAFSALS
                     LIL"
     CDS             complement(9372..9722)
                     /codon_start=1
                     /product="hypothetical protein"
                     /label=hypothetical protein
                     /db_xref="SEED:fig|6666666.357098.peg.17"
                     /translation="MSEATYKEALMNDYNHQRMIEEILEEYESRLEQSPEEQQILTERI
                     TNMHRNARLIGDMKVLLKNRCHIAGTDDRPIGAMVELPQTENYLLDVQEEIFRRVTMIE
                     RAMELSGLSIVA"
     CDS             complement(9758..10012)
                     /codon_start=1
                     /product="hypothetical protein"
                     /label=hypothetical protein
                     /db_xref="SEED:fig|6666666.357098.peg.18"
                     /translation="MTINMTPVKSSQIHSIGHDPATSTLAIRFNGRNNVPGSLYHYSNV
                     SADDFAAFKDADSVGSHFYKNIKPHTDRFPYQRINEDKK"
     CDS             complement(10002..10286)
                     /codon_start=1
                     /product="hypothetical protein"
                     /label=hypothetical protein
                     /db_xref="SEED:fig|6666666.357098.peg.19"
                     /translation="MGDVGDYFRDIKPFLKENRRKARDGAHKRIKAFFIRNGIELEEGN
                     NTLIFRTPQGTVAYYPPSQRMQHKNEWKTCSPTYCMNYVRKLRGLTNDH"
     CDS             complement(10279..10527)
                     /codon_start=1
                     /product="hypothetical protein"
                     /label=hypothetical protein
                     /db_xref="SEED:fig|6666666.357098.peg.20"
                     /translation="MDKRLRDAAASDCAEVDESDFDNRVIILEKGDYCGVMLSYRFRYR
                     KRKKNGDLEQRCTNGDTKIAINFCPFCGTKFKGKADG"
     CDS             complement(10553..10930)
                     /codon_start=1
                     /product="hypothetical protein"
                     /label=hypothetical protein
                     /db_xref="SEED:fig|6666666.357098.peg.21"
                     /translation="MSGTQITALPDSLTVGGGLDLSGTQITALPDNLTCESLYLDVEHI
                     QNISWRKNCGYSNRTIFAVWTQGNFNIAAGCFFGPLDVFENRVTEKYGSGSAGAAYKRA
                     AQECIAELTEKLNKSGADNGL"
     CDS             complement(11168..11425)
                     /codon_start=1
                     /product="hypothetical protein"
                     /label=hypothetical protein
                     /db_xref="SEED:fig|6666666.357098.peg.22"
                     /translation="MTKPRKKRRTAMTRQCMEKIQRIAKRKSDRVGKAILLAECCKKMQ
                     VCPAPKKALESSENPERHTGYTAIGRQKMRGCSTIPHGVY"
     CDS             complement(11509..11655)
                     /codon_start=1
                     /product="hypothetical protein"
                     /label=hypothetical protein
                     /db_xref="SEED:fig|6666666.357098.peg.23"
                     /translation="MTDPRAWARPLRSVAGFFWGVVNAQADARRMETTGLVDPLGCSNW
                     HLL"
     CDS             complement(12256..12912)
                     /codon_start=1
                     /product="hypothetical protein"
                     /label=hypothetical protein
                     /db_xref="SEED:fig|6666666.357098.peg.24"
                     /translation="MDFWIVIGIAAAVIYLVNKKKTKITDETVIRQTNTIKTSTGEIRI
                     ERTQTIKHEHTEYAAPYGKAAPLAPIPTITEVSTEKRSTLSQLEDEFARKMKEEKEVAA
                     PKITITHPMRPASKPITQRPVTTDNVSAESSANAGKKVCPRCSRNLAYDKFRKSSKHEG
                     GYTTWCDECLSAPRNTQHMKYCPKCKKRKMKTSFYKNGNRADGFTLWCKNCMDNS"
     CDS             complement(12976..13656)
                     /codon_start=1
                     /product="Phage repressor"
                     /label=Phage repressor
                     /db_xref="SEED:fig|6666666.357098.peg.25"
                     /translation="MNTNQNVFMDIKEIRRARLKEWFSERAIPEKEKSFISQLLSGKAS
                     FGEKAARRLERDYAMPSGYLDMELSKSYVSKSGDSVEHYRVDVMDIRASAGPGVIVTGD
                     YIETITAVEFTTEQARQLFGGRISEVIKMITISGDSMAGTINPGDQAFVDVSVNAFNGD
                     GVYVFVFGNTLHVKRLQMMKDKLAVLSDNEKYKPWFIEAGDEDQFHIVAQVLIGQTVEY
                     RRFA"
     CDS             13730..13957
                     /codon_start=1
                     /product="hypothetical protein"
                     /label=hypothetical protein
                     /db_xref="SEED:fig|6666666.357098.peg.26"
                     /translation="MELKTYIKNLERGGAKKLAATLGISQSHLSQIASGRCPISPERCV
                     DIEVATAKCVSRQDLRPHDWSRIWPELISQ"
     CDS             14006..14362
                     /codon_start=1
                     /product="hypothetical protein"
                     /label=hypothetical protein
                     /db_xref="SEED:fig|6666666.357098.peg.27"
                     /translation="MTTIHRPAGDTAGAAIASGVRKELLSRKKVGKAGLPFHDVREDQI
                     KTRWTESEAATIKSVAGAMSSNPAVETNTAAIRGFLAMFAESPDMLTHVHRELIAAGLP
                     IPDWLPPLPERAPR"
     CDS             14359..14553
                     /codon_start=1
                     /product="hypothetical protein"
                     /label=hypothetical protein
                     /db_xref="SEED:fig|6666666.357098.peg.28"
                     /translation="MKQSYETQISTTQSVDLVASIVGGKLDIAGEETRRLAITGALSHV
                     TRAFYSRQVVTVELKRTRR"
     CDS             14557..14733
                     /codon_start=1
                     /product="hypothetical protein"
                     /label=hypothetical protein
                     /db_xref="SEED:fig|6666666.357098.peg.29"
                     /translation="MEITKPLNRRYRDKNGVIVHVTGYEPATQRVIFTRPGYEHPCARP
                     LWQVQKYFTRLDV"
     CDS             14794..15777
                     /codon_start=1
                     /product="Origin specific replication initiation factor 
                     #replication protein O"
                     /label=Origin specific replication initiation factor #
                     /db_xref="SEED:fig|6666666.357098.peg.30"
                     /translation="MSRIFNIVSELTGQRNSIVIPRPLLRFFSLKGEQQAAQLAMVLGQ
                     LIYWSGKSKLADGWFYKEHAKLGEELELSARQVQRIVEKLELHMPGVLTTGTHQLPSGK
                     TVKHYHLDGEALIGLIFPEQKTIDKPDENPPTLPVGNSEDGNPGIPKMELGDSEVGIPY
                     LYAVNYIQRDDLTIISKYSSQRFSQANEATKAKADKFISHHPDAVIFTPAGKAWGTFED
                     VKAAVWMYEKILTLDASAKTPNWPEWANTIRLMRQQDGLTHREICEAFRWANTHEFWQS
                     NILSPAKLRVKWGALKIQRTNQIGKQHREELDWDSTDWADGLGGLI"
     CDS             15774..16526
                     /codon_start=1
                     /product="Origin specific replication binding factor 
                     #replication protein P"
                     /label=Origin specific replication binding factor #rep
                     /db_xref="SEED:fig|6666666.357098.peg.31"
                     /translation="MKGIQSIQRHIGNRNGAALAAMSAPQQNAICFEPDANVRQLFNSL
                     FQQLRVIFPAVNAHIKTQAELDELRQQWTRAFAENGINSPALIQMGLRRARLSESPFLP
                     SPGLFIAWCREGGSQLAGLPDVDAVMEEFQRYSAQRGFYATPECFPWSAPIMFWLVTDM
                     RRVMLQYNHTTGEMRKVAERLLKQWEKKVMAGQPIPAPKTQLDDLRRPPTIGAELGIAT
                     AETDVRGQEFLNAIRARYPRRNTTTNED"
     CDS             16530..17663
                     /codon_start=1
                     /product="DNA recombination-dependent growth factor C"
                     /label=DNA recombination-dependent growth factor C
                     /db_xref="SEED:fig|6666666.357098.peg.32"
                     /db_xref="GO:0006310"
                     /translation="MTMIFKNALIYRLTRDIAFDDLNDKLAVFTFAPCGSQDRAKTGWI
                     SPLGVGYSELIHQANGQILLTLQREEKILPAPVIARELAAKIDSMETVQQRRLKKTEKD
                     ALKDEVIQTLLPRAFSKYHTTQIWINAGAGLIIVDAASAKKAEDALALLRKTLGSLPVV
                     PLMLETPIELTLTEWVRSGAAPAGFALQDEAELKAVLEDGGILRSKHQDLVTDEIAGHI
                     EAGKVVTKLALDWQERINFVLGDDGSLKKLKFSDVLLEQNDDIDREDTAQRFDADFVLL
                     TGELSALINSLIDALGGEADRVAPEPENHDLQDDRLYPEAVQFVQSSCRATISGLQRHF
                     RIGYNRAARLIEAMESKGVVSAPTHDGTRTVIGEAVQ"
     CDS             17660..18436
                     /codon_start=1
                     /product="Phage-related protein"
                     /label=Phage-related protein
                     /db_xref="SEED:fig|6666666.357098.peg.33"
                     /translation="MNTPIVIANIAIRRDTDGRYNLNDLHRASGGEKRHAPSYWLANKQ
                     TIALIAELETTEIPVVRLEGRNGGTFVCRELVYAYAMWISASFNLRVIRTFDAAANPNP
                     TAENVRERVQAGIMIVESAARTLNLSNSSKLGAYQKLQSIIGINLMPNYAIDAPSDAAD
                     GSSRTTKALTDLLRQHGFTMTAAIAYLRLEAAGIVERKTRSSTGKKTKSFWSLTSQGLR
                     YGKNMTSPANPRETQPHFFESRADDLLAIIAGRDAA"
     CDS             18433..19299
                     /codon_start=1
                     /product="prophage LambdaSo, DNA modification 
                     methyltransferase, putative"
                     /label=prophage LambdaSo, DNA modification methyltrans
                     /db_xref="SEED:fig|6666666.357098.peg.34"
                     /translation="MTDFSQTEYVQALNAQKAEDAHLLKDVGDQWRTPDTLFWGINAMF
                     GPLVLDLFSDGENSKCPAYYTAEDNALVQDWSARLAELNGAAFANPPYSTAKMHEGEYI
                     TGMRHVMAHTAKMRERGGRYVFLIKSATSEVWWPEHADHVAFIRGRIAFEVPAWFKPKD
                     DKQIPSSAGFGAAIAVFDKEWRGPSVSYIQREKLLATGDAFLAQIRREAGRLVPQQSII
                     IPETENTVWPSEVNFLFEQIPAAITLPAGLQNKLRSHINRLKLEGVPDSAIITTAETLS
                     VAMGAAA"
     CDS             19296..21200
                     /codon_start=1
                     /product="C-5 cytosine-specific DNA methylase family 
                     protein"
                     /label=C-5 cytosine-specific DNA methylase family protein
                     /db_xref="SEED:fig|6666666.357098.peg.35"
                     /translation="MKNNREIVVDNFAGGGGASTGIELAIGRSVDIAINHDPNAIAMHA
                     TNHPDTLHYCESVFDVDPVAATAGRPVGLAWFSPDCTHFSKARGSAPVKKEIRGLAWVV
                     LRWALAVRPRVMMLENVAEFKTWGPLLTDADGTRQPDPVRSGETFAAFVGMLSDGVAAD
                     HPALAECCEFLGITIDSEPAQRLVRGLGYNVDHRELRADNYGTPQRRKRFFMVIRCDGH
                     PIVWPKPTHGDPKSLEVQAGQLKQWRMAADCIDWSIMSTSIFERKKSLATNTLRRVAKG
                     LWRHVLTNAEPFIVGAGGPEYSGKPVAINQPFGTIATENHRAVVTPLLTPFINEHANAS
                     SQRTMPIDESMRTLCAQVKGGHFSVVAPTMIPLRGTNEHQLFGHSIERPLSTVTASGAH
                     HALITASFGELCGTGARRWSDGIRSLKTPLNTVTASAAPSALAMALFEQANGGFYDGDG
                     HAADTPVSTLTASGSNQRLVTAYAVKYYGTGDRGQSADEPMHTITTKDRIGVVSVVTVP
                     ADCLSPDLREKARCCAELLHKFLPEHFCELVEMVLMAYCGTWYVLVDITLRMLQPQELY
                     AAQGFPSWYVIDMDYRGVRHTKTAQVARCGNAVPPQFAEALVRANLPEMCAEREEVAA"
     CDS             21197..21844
                     /codon_start=1
                     /product="Phage protein"
                     /label=Phage protein
                     /db_xref="SEED:fig|6666666.357098.peg.36"
                     /translation="MTTATRTKSPKKHKTEALGVLLPGGGIKYCTDHDRDVMKGVPIGT
                     PISLTPIGDRRSIKHHRKFWALLDLGFSYWEPAWSFVSDREKWIAHEVSKEVAQEAGDP
                     SLYDNVTRIIAERVLERLTAQLKRRFDPEAVKTKDAYLNHVMVKAGFYDLAPNPDGGTL
                     KQRWSIAFVNMGQEKFDKVYRGVFGVIWNETLNQYFADEAEMENAVNQLMNF"
     CDS             21855..22322
                     /codon_start=1
                     /product="hypothetical protein"
                     /label=hypothetical protein
                     /db_xref="SEED:fig|6666666.357098.peg.37"
                     /translation="MTDNVDFPDDSDNVLQFTRRFDDNADIKEMRNFVEAPKPEGRTCR
                     HERVVVSEHERSVSCRLCGAVLEPFDHLLALAKKETRIEWELTGLRHEIKSHREGLEKL
                     KREEANCKGRLRNAQNRLSDINGQIHAANQELQFVLKRVGDIRAIKEKGHA"
     CDS             22456..22647
                     /codon_start=1
                     /product="hypothetical protein"
                     /label=hypothetical protein
                     /db_xref="SEED:fig|6666666.357098.peg.38"
                     /translation="MAYKSDDFFAVFGCSSCHDVIDGRVPYGWRPGEKEETYLAALHAT
                     WRIWFDESLLVAKGGRFA"
     CDS             22640..23104
                     /codon_start=1
                     /product="hypothetical protein"
                     /label=hypothetical protein
                     /db_xref="SEED:fig|6666666.357098.peg.39"
                     /translation="MRNSIDALAVVGSRAKLEMHGGGVCKVCHQPELEEQAALIQWAKL
                     ATINGIRPGNYLIHIPNEGKRGPKAARDAKRLGMRSGVHDLFLALPCGGYAGLWIEMKA
                     AGGRPTPGQLEWQELMRMAGYRAEICYGFDSARNEIERYLQNMKCSAVNP"
     CDS             23169..23978
                     /codon_start=1
                     /product="hypothetical protein"
                     /label=hypothetical protein
                     /db_xref="SEED:fig|6666666.357098.peg.40"
                     /translation="MTIAIEQLIKMHDPRCMSIESLNVGRGRASLSKDQILGALATAQR
                     HNSTGYDVLMAKYRHDNQAEQRIRAAITDWAKTHSDLEHAESACQLALNMMLERNLPAQ
                     INHISKLLCKYGPRFSQVRKNIDLLRAEIKRLEKARSQAKTADKEYHLIGQQIVALSAR
                     VDAERQGLKAWATQQAMRSNLCPRCSGTGRTHRPVIALCNECGGGGRITATYEHLRASL
                     ANIGAVITTGEWPQYLALVKQCLRWLYVEESGALDILKMRLRDEIIQ"
     CDS             24060..24287
                     /codon_start=1
                     /product="hypothetical protein"
                     /label=hypothetical protein
                     /db_xref="SEED:fig|6666666.357098.peg.41"
                     /translation="MTNCLNNYTIPRIAEKTSPKEIVDEAYAVCKKEVKTWQEGRRDLS
                     EEMQVQHNKEMYDFYIRMIEIRRKATHNPN"
     CDS             24442..24783
                     /codon_start=1
                     /product="Phage holin #Lambda-like group I holin"
                     /label=Phage holin #Lambda-like group I holin
                     /db_xref="SEED:fig|6666666.357098.peg.42"
                     /translation="MKMQNNVHTWTDFWDLLRMWWNGDMPLGGVLLSILITVLRVAYMG
                     GGHKKMLLEAALCGALTLTVISSLEYFSLPRTLTVAIGGSIGFIGVEQIRTLALRILGN
                     RFGGNNPQA"
     CDS             24789..25295
                     /codon_start=1
                     /product="Phage lysin, 1,4-beta-N-acetylmuramidase (EC 
                     3.2.1.17) or lysozyme #Protein S in phage lambda"
                     /EC_number="3.2.1.17"
                     /label=Phage lysin, 1,4-beta-N-acetylmuramidase
                     /db_xref="SEED:fig|6666666.357098.peg.43"
                     /translation="MTQNPPRHKNLSAFLDMLAFSEGTATHPLTRNRGYDVIVTGLDGK
                     PEIFTDYHDHPFANGRPGKIFSKQGLRSTAAGRYQQLYRYWPTYKAQLKLPDFSPDSQD
                     SLAIQLIRERRALDDVIAGRIERAIEACNNIWASLPGAGYGQREHKVERLIAAYQQAGG
                     VLAQD"
     CDS             25381..25902
                     /codon_start=1
                     /product="hypothetical protein"
                     /label=hypothetical protein
                     /db_xref="SEED:fig|6666666.357098.peg.44"
                     /translation="MLTTKMKALLLCGGLAAAFGAGWYVQGVRWDADISARETAAAQEA
                     STGQQAVIATQALTFHRFNEIARQANQYAINIKAKSDEKQIIYRTIVKRDPASRQCVSD
                     DVANRLLDYAHSLRASTMHTTASGVDPAGTGAAASACRLTYGQVIYWVDSLLAVIEQAN
                     GQLAGIRKTE"
     CDS             25988..26218
                     /codon_start=1
                     /product="hypothetical protein"
                     /label=hypothetical protein
                     /db_xref="SEED:fig|6666666.357098.peg.45"
                     /translation="MEIDIGNFTPVDGVNDKAVYAEATIYTDPAQGGENVSLYLRLPYD
                     PNLTIGDLQRLTKLEAIKKMRAAADWLSETE"
     CDS             26344..26976
                     /codon_start=1
                     /product="Phage protein"
                     /label=Phage protein
                     /db_xref="SEED:fig|6666666.357098.peg.46"
                     /translation="MTQTSVLPRYRCHKVVQAAKIIDVNPLDNGKSSLTLDGDILLFAE
                     RGYIEKHNPQPGGYFVLYEDGYQSYSPAAVFEAGYNRLPELGGDVGDNQQEIENRNIER
                     AARAAHEVNRAYCAALGDDSQPAWEDAPQWQKDSAIEGVVFHLTGDHPPEASHNKWLEF
                     KKQEGWKYGPVKDAEKKEHPCFVPYEQLPKEQQVKDYLFRAVVHAFK"
     CDS             27038..27910
                     /codon_start=1
                     /product="DNA packaging"
                     /label=DNA packaging
                     /db_xref="SEED:fig|6666666.357098.peg.47"
                     /translation="MAKYDWKKLLADYAAAYSATGISPVEWCAQNEVPYSSAKRYITIK
                     AATDFIELNSQIRSSQKSDSQIRKEKGANRKSEKKRDDSGDNDMEESAGTDNSDTGDCP
                     PETKPQRDASGRFAEGNKLGGNYGVPANAFQPGNQIPRKHSAYAKYLDADELFDAAKES
                     DLRDELVFTRARALSVTKTLNKIMEDLHNAPDVETRIELYDKLLKAEAGLDRNIARIES
                     IENSLSRLQLDAVNVPRLSADTLRIKAATAKLKAETEKLTAESKDVTTPLTDVVRDIHA
                     MPDDGMLAQ"
     CDS             27907..29622
                     /codon_start=1
                     /product="Phage protein"
                     /label=Phage protein
                     /db_xref="SEED:fig|6666666.357098.peg.48"
                     /translation="MTTPQYDAGLVDDELDGMTEAQQRLFILSKLSNPWWRLNNLYKIE
                     NEKGQLVTFRMRPAQRRLFQAMHYRNVILKARQLGFSTAIDIYLLDQALFNTNLKCGII
                     AQDKTAAGEIFRTKISIPFDNLPGWLRSTFKITERRSGANGGYILFSHGSSIQVATSFR
                     SGTVQRLHISEHGKICAKYPAKAKEVRTGTLNAVHDGCIVFDESTAEGVGGDFHTMSIR
                     ALELAQSGVSLTMQDYKFHFYPWFDDPKYVAPVPKGGLRLSKYHQEYFAAVEAATRVTL
                     SDEQKQWYIRKEVEQGEEMKQEFPSTPQEAFLTSGRRVFPAINVMNAESGCCPPRIVYD
                     IDPVTGKREKVQALRAGGQDELQRTLLNHLLVWELPDPDGDYAIGADVAEGLENGDRSS
                     FDVVKKSDGEQVAHWFGHLDAELFAQLLAHVGTWYNTAYVGPERNNHGHAVLQKLRDIY
                     PPRAIYAEQHLDRDNDDETPKLGWLTTKQSKPIVTEGLKTLLREKASGIRWVGTINELN
                     TYVYDAKGSMGAQTGCFDDQVMSYAIAQEMRARMPTRPKLKPIDRSKPTHWMSH"
     CDS             29622..31751
                     /codon_start=1
                     /product="Phage protein"
                     /label=Phage protein
                     /db_xref="SEED:fig|6666666.357098.peg.49"
                     /translation="MNTAAIEAVAEPQPQDNRDRFTQRQLLDISSDIDAQPDWRTTANK
                     ACAYYDGDQLAPELVAKLRERGQPLTMHNLIAPTIDGVLGMEAKTRTDLMVIADDPDEE
                     MEQLADAVNAEFADVCRLANMNKARSDAYAEQIKAGLGWVEVRRNGDLFGSRYKVGTVH
                     RNEVFWDWHSREADLSDCRWLMRKRWLDVDEVKATFPGMAEVIDYSINAWRGFVDTDIA
                     EGQESALISAYEEYQQWSRKDTEWVSSNRKRVLLQVIYYRTYQQLPVLELPNGRMVQYD
                     KNNLMHAVAVASGRVSVVMSRVSRIREAWFVGPHSIGDRPCTAPQGMFPLVPFWGYRKD
                     KSGAPYGLACRAIPAQDEVNFRRIKLTWLLQAKRIIKDADAVNMTDRQLLDEAERPDGL
                     ITLNPDRKNKTTAADAVNIQQDFQVAQQQFSVMQESMRLIQDGMGVYSAFLGQDSSASS
                     GVAISNLVEQGATTLAEINDNYQFACQQVGQLLLSYLLEDLTRRRNYTVVVNRDDPRRR
                     RAVTINQESENGNGMTNDVSRLRAHIALAPIQQTPAYKSQLAERMSQVITGLPPQAQAT
                     VLDMWVELLDVPRKAEFIERIRSALGTPKSPNEMTPEEQQAAQQQQQLQAQQQELAMRE
                     IAGKVAKLEAEAQRIAAAAQREQVLANSQRFDDARTQAETGRILQEMESTTREMDALHG
                     QIMQTIQAQIDAIAV"
     CDS             complement(31828..31953)
                     /codon_start=1
                     /product="hypothetical protein"
                     /label=hypothetical protein
                     /db_xref="SEED:fig|6666666.357098.peg.50"
                     /translation="MSDRSEGLRRIAACANQRPVTKALTRTNKNAHRMAGADFVA"
     CDS             31977..33059
                     /codon_start=1
                     /product="Phage protein"
                     /label=Phage protein
                     /db_xref="SEED:fig|6666666.357098.peg.51"
                     /translation="MELDLTGNETPEELEALLEKIGEVTVDDKTAPGNTSAAVTDTTVT
                     GTTGAQTATTQAAASQQNTGDNGSNTPTPGVAVGQRSAASGQATDTEQATAAKILLSKD
                     GKHAIPYDVLEAERAEKRRLAESNQRTAAELAEARRQLEVFTRQINAAGLQPAQLPEKS
                     QITQEQLDVLRESFPDVANVIDVLAQKVEHLQAVQPVPAATQSNESNPVSMALDATPDL
                     KAWQSDDPDRFTLAIHIDETLKHDPAWKDKSLTERFGEVVKRTRAAYGETVESTPQQSA
                     PAGQPAQPTPAELQQKAADALAKATAAAQLPGSPSDVGQAATQSPSLLEQAANASPEQL
                     HAMFSGMTDAQIEALLEQAI"
     CDS             33119..34342
                     /codon_start=1
                     /product="Phage protein"
                     /label=Phage protein
                     /db_xref="SEED:fig|6666666.357098.peg.52"
                     /translation="MTTITSSQANKLMQVALFTAANRNRSFVNIMTEQQEAPKAVTPDQ
                     KGVKQTSYTAPVVRITDLQKQKGDEVDMQIVHKLSKLPTMGDEKLAGRGENLAFADFSL
                     KINQGRHLVDAGGKMSEQRFKHNLNKTARVLLGTYFNDLQDQCATVHLAGARGDFIADD
                     TILPLAGHSEFGKIMINDVLPPTYDRHFFAGDATSFEGLDAADLFTLGVVDNLSLFIDE
                     MAHPIQPIKMSKDEMANEDPYYVLNVTPRQWNDWYTSTSGKDWQAMLSRAVQRSKGFDH
                     PLFKGECAMWRNILVRKYTGMPVRFNTGSQVAVSNNDLAATVALKEAKTTIDRALLLGG
                     QALANAYGSGEDGGHFGYNEEKVDHGNGTEVSIRWVNGLKKIRFKQKDGRINDHGIIVV
                     DSAITTPR"
     CDS             34367..34750
                     /codon_start=1
                     /product="Phage protein"
                     /label=Phage protein
                     /db_xref="SEED:fig|6666666.357098.peg.53"
                     /translation="MAIIKSPSLRDAIYQGAEGNFSIAESQVVLKAAAINDVVELLEMP
                     IGMRIYGVDVISDALGANVTLEIKSGDKVLVGAAAHSAAVAKSVPVTPYTTQTDREKVI
                     ATIAGGVATGSLIVLVKYTVVGY"
     CDS             34808..35242
                     /codon_start=1
                     /product="Phage protein"
                     /label=Phage protein
                     /db_xref="SEED:fig|6666666.357098.peg.54"
                     /translation="MDTISLVYIGSKDKKRDTITNSRLIFPRLVPVDVDSAIAHQLLAF
                     PTVWVRESDAGAVLKQHEEEEALKTARMAEELARLQAEADANSWVVTVGNDDVDLAKLT
                     TVQLKTLVEAEDLDLKQGAQEKADAFRVRVRDAIKAKATE"
     CDS             35242..35823
                     /codon_start=1
                     /product="Phage protein"
                     /label=Phage protein
                     /db_xref="SEED:fig|6666666.357098.peg.55"
                     /translation="MAALDVFLPSVRKHIAGPLDIMMRQSIREAAITFCRESLFCRDIV
                     LLTNVQPGVAYSLTGSPLVKCVKRLLITNLSSPDTPSELDAGTDFTVMSANHLVFSRAY
                     SSISVLFAVEPRRDADEVPDALADDYTDVVAAGALEDLYIMPGKPWSDPQRAAYFRAIF
                     TEGFRRAYRDALDNSPVTRTRNPVRRHEFY"
     CDS             35823..36482
                     /codon_start=1
                     /product="Phage protein"
                     /label=Phage protein
                     /db_xref="SEED:fig|6666666.357098.peg.56"
                     /translation="MITINDVIGRANAQLVDTHWLRWSKSELLDYFNDAINAVIIIRPD
                     AGASVEVFACQPGTRQQLPDGALRLLDVIRIVGGRAIQVIARNMLDYQYPDWHTLSGPI
                     ERYCYDEQTPRTFYLFPGATSGVSLEISVSRLPQAAAIGDLRADVSRAFPLDELYINPV
                     LEWILFRAYGKDSENGNYAMLSSQHYQTFVDLLGVKAQTDQAMGQKKQVQSGGGAQ"
     CDS             36479..37801
                     /codon_start=1
                     /product="Phage tail fiber protein"
                     /label=Phage tail fiber protein
                     /db_xref="SEED:fig|6666666.357098.peg.57"
                     /translation="MSVLISGVLIDPAGMVIPGAEITFTAITNGHSVLNGFSASATTNG
                     RGEYAISLELCDYSISVQYAGNNAVYGSVSINKDTTPTTINDLLEKTRLEQAVTPQIIV
                     YFREIQADVNQKLSVAGNAASSAANSANASAASAASALQAANNASNAAGIASNAASSAA
                     GSAATAQKSATQAEVWAKTIDVSNFAQKDGTGINAASFRNNLGLGNSSTRNVGTSSGTV
                     AAGDDARLGTIGGRSGGAVIGEVIAGGASPASTPVAGTYSNGVAVGSRFLSGVYSDVSF
                     FIYPQVVQQAAAAAKTGILQLSHDNTYVAWMFNSSGVATGASWSPTSDERLKNLDGPIT
                     EPLQKMRRMRGQTWTWKTNGAFGIGITAQDIQRVFPEAVIETNDVKLPNGDVVERALSP
                     DTYGVAAALHHEAILALADKINEQESLIEALSVRLSELDAR"
     CDS             37879..39501
                     /codon_start=1
                     /product="Phage protein"
                     /label=Phage protein
                     /db_xref="SEED:fig|6666666.357098.peg.58"
                     /translation="MATIDITAMRGEMPRVVEHLLPDANSTLAQGCHFRHGVITPMLDD
                     VDQQKSFAIKPETLFRYRDNFWFAWNKAVDVIRSPVANDDYGRVYYTDGDFPKVTSALI
                     ATKGSGNYPAAFFRLGIPAPANPITVGAVTPPAGVGSNDPKDDETRYYTETYVTAYGEE
                     GPPGPASAELTIAYSGSSVELRLQPPGQQNHNITKRRIYRSATSSESADFLLVAELDIA
                     VATFIDNLSESQLSASLETYGHNMPPDGMIGLCMMSNGIAAGFMGNQVMFSEAYLPYAW
                     KDANKQTTRDEIVAITPVGTTLIVGTKGIPYVFSGITPSNITSSHSLIALSCVSRKSMV
                     TMDGFALYASPNGLVSISADGAAAIATANIIEAKQWRQRFNPASIRAWRVENEYFALYD
                     TDSGVAGFIFDPVNMDIRYVATSFDAAYNDESGDTLYIVKGRQLYTLNTGVPVNFRWRS
                     KLFLAPSNTSFSCLRVMSDILPSIGVILYADKKVVMQLPPGSLRETLLKLPPMRGKRWQ
                     IEVYGNAQVDRITLTTSMQEMPA"
     CDS             39498..40661
                     /codon_start=1
                     /product="Phage tail fiber protein #Phage host specificity 
                     protein J"
                     /label=Phage tail fiber protein #Phage host specificit
                     /db_xref="SEED:fig|6666666.357098.peg.59"
                     /translation="MSSTKFRAGRDQEAVVENIETLTGQRGDGRNRAVTYGDLAGLGLA
                     NLRQLGGGKVALSPGNGLGGSGSGGGVQKPTKPTGFKATGGFAYVLLEWDMPNYRGRSL
                     TEIYRSPDDNLADAVLVASSAAGVYGDPVDPGWSGYYWVRHVNSEGDPGPFNDVKGTHA
                     QTHPDPAVIIDVIRDQLNASPLIENLSRSMEENKAAVQTNKEIISRIDKNGSAAYQSLW
                     NTKAQAGDIKAGIGIVAGRDANGNTISQVAVAASQFFIFDPNNPNDKNTYAIPFAVSDG
                     KVVIDEAVMRTAVIKILAAQSIIADSVRAGIQIVSPYIKTARIESGGFTVDPLGNATFG
                     ELVRISASGELSIRSSVDGRGMNISNNEIRIIDKNGVERITISSRDR"
     CDS             40738..41046
                     /codon_start=1
                     /product="Phage protein"
                     /label=Phage protein
                     /db_xref="SEED:fig|6666666.357098.peg.60"
                     /translation="MSNIQNACRKKQAFCFGTEDTRIVLRPRSYHGIPYVVVWLGVSTK
                     KDALAYWLPHVQELTRMVGGRWAEFYTVRKGFIRVAQRLGFERLPDEFGLMKFKIAV"
     CDS             41055..41729
                     /codon_start=1
                     /product="Phage protein"
                     /label=Phage protein
                     /db_xref="SEED:fig|6666666.357098.peg.61"
                     /translation="MGKGGGGSTEVKETTQQMAAAEVASKQWNLYQNELKPYENLFMEK
                     VDSLNDGQKYGNIAGDVNLGYQQEFARTRRQAADGLASVGVDPSSGKFQSALKDIATDQ
                     VAGTIDATNRAQTDQQNKYVAGLQDVQAMGSGQKAEALQGYQGIAAASQQKAISDAQSA
                     LSKQQASKGLIGTVGGALVSKGLSSFPAKTPTTTLSSGNSSGVFGVSDVPFMSSNFRNV
                     GG"
     CDS             41732..42109
                     /codon_start=1
                     /product="Phage protein"
                     /label=Phage protein
                     /db_xref="SEED:fig|6666666.357098.peg.62"
                     /translation="MGVASDTFADITRKQYDDWMQRYYPRLQGLMELSTSGQLMNNQLA
                     RADATQQQALNTATVGAANQQARYGATQQNGTDNSLGLKTALATAGAKNGIRDAETDRQ
                     MSILTGGSTGLRELLKIGSET"
     CDS             42109..42384
                     /codon_start=1
                     /product="Phage protein"
                     /label=Phage protein
                     /db_xref="SEED:fig|6666666.357098.peg.63"
                     /translation="MGYGLIDIAAQTRQQGMQGMQQAAEQEQQREAANEQLKAQQKAAA
                     NQTKGAMAGMGAAGGAALGASYGSWGGPIGMGIGAAVGLIAGSLFS"
     CDS             42396..43742
                     /codon_start=1
                     /product="Phage protein"
                     /label=Phage protein
                     /db_xref="SEED:fig|6666666.357098.peg.64"
                     /translation="MADVRGLADGFLAGFNTMDGALQRREESELRRLQMQQQQQNADRS
                     FGLAQQQFDYGKETDKRNFDRQTGLDKEDARRFGLNQALEQQRLGIQRAGVGIQAQELS
                     LRRDELTYQRTERERQRRMTEQMPTVQAFYDRLKTNNGQWDEDALRLAGQISDDNPYSP
                     KRFVGPDKIQTVRDMNKIMPQVMSGQVDYNDPQFVSVADKVLAPYIKRGLGEKDPSTGK
                     TIKDKELAHIGLTEDGNGIFLSVNTKFDDGSVSKMKPMTRYASSDPQDNVVVIPLDKAM
                     AQFRGYGQMVGAINSDPSTAQFMNRLVNGSSKQDRAEAKEYRTQAINSQKERAKALAKD
                     PDNASTINTQFDKLDDQIAESFGQKTKNRTAPALQQWAGNDPGKVAFAQKALSAGAFTG
                     DINPAQLDTKYAEYQKGVSVPNTQNNQPKNNDSYTAQYLRGMQKVEQGK"
     CDS             43788..44276
                     /codon_start=1
                     /product="hypothetical protein"
                     /label=hypothetical protein
                     /db_xref="SEED:fig|6666666.357098.peg.65"
                     /translation="MKKIACLFFAISVLAGCSNHGRDDNQALRLNAAYSSDYYLPQSVS
                     ILIAESKVLSETLVLAVDLKRINDIRGTYRASRPKVTVNYNVSPVDESKCRITYSGTIN
                     YLSSLNIHTYNGLTTIGGNAIQNVNIPTRTAEVQYGKNVEFALDENVKLNLSVEKETK"
     CDS             44808..51719
                     /codon_start=1
                     /product="Phage protein"
                     /label=Phage protein
                     /db_xref="SEED:fig|6666666.357098.peg.66"
                     /translation="MAYDPQQLQQQRPEQQTANNNRQGLNIQQPGELSDFDRQFFSPEN
                     WNKKPVEASVTLGDIVKAAVAAPLDMVSAGGELFRAGNQLLDDKADAQAREYQKQYGID
                     DQTMAVMRQTAGNPLSRAGSAIIQGVGSLAGAASQKIKDSYSDGAKKAASLDFVSAERN
                     KEGNITGLRAGEGLFDKDTWLINAVPTIAQLISGGAMSKVGASAAREMAERAAFNRLSK
                     SMPEEAARQLAKETADRAAAVAGKSTFVGTMAASAQGQGGIDMRNEINALSFDELTQSK
                     TFQQAFSDVDSDPQYARLDDTQKLTLARNMVADRAATAVTADPRLLAVNIAASTLGDHT
                     LLSLLTKKGAASGVASGVAAGALSEGATEFAQGAGQRYVQNQQLIGTAGQKIDPMKDVL
                     EVGANNAVVGAGMGGAAGAVGGMRGHHANQSPDSTVDTPEWKASYQEGNQDNGSSIPVV
                     KMGDDAPPPGYTGEWRDGGPVISVTEGAEQPALSPYEEARQRYATQDRAAMLREYASAD
                     LTNNSELKRAASERLDELDQHEKIAQKVEAFKQQSDDELLTTYRKLNENPKRSEEEQLQ
                     HEAVRTVLSERLGIDAKGKQQPAPQPLHQQSAPEVESLQSATPDNQSPNGIPPGRMDAF
                     RDTPAYLRQDSRIQGFADDSDVQRALAEQQYAPTAEELISQQMGQGDQGYTPEELAIIE
                     QAEKIRAARTPRLPAPGQTSVIAMPGELHPMMSDERAAGSGPQFDAGRQVRGQSFIPAE
                     RPQAGNEVGRASQTYDSETVPTHAIEDKGIIFSGSPTIDEGQTAQPPQFTSGETRTQRK
                     TREFTEAMGGNNQAALPDQRHRVAGVPVDATTEAYARGEPVGELKFYTKNRPFTSEPLA
                     RHSKWGKMPGATVEEVEGGYAVRLPAPEYGQQGKAAGFGEEPRGTTQNSGKPAKIEVFR
                     RQADGQVFLGYKDSTRVLPLKAGFKDSAEARAYLKDNRAELDEKLEKLRKTLNDNASKN
                     GGVAVSGVDIGGGNIIHDGSFSRDGHKPETGMLRDRVQLASDLFVSHLNGAAKIKVKAV
                     QTQAEAAAMMPNGIPAEFGTVHAIYQPELSRVIVIADNIAGPRELRAKLSHEIIAHHGL
                     ASVIGDVEYDRIMRVLHQTRESKNKTIQEVWHQVERSYGNESLEEQANEFLAHMAERSE
                     LTGLGGMWDRFISLLTTGLRKAGVISHADITPAEIRNILRTITGRFKKTAMYANEKPGT
                     REFEDTFSRTDALYSKADDTDPLRPLPEEAEQYRTELGNAMRSMRSGDMSIRIGRTPPV
                     LRALGAPNLDMYINRDTVRKATNGVKHDVPLSVIEHLPELMHDPITIYRSATQDNAVVA
                     LLEANDMNGNPVVSAVHMSAAQRRIEVNRIASVYGTEEGKKIKTMEREGLVLYRRKKEN
                     PDNPHSQGLQLPKEERSYQGSDQNILSSADIRKNKALYSRTGNPAMDAETSRKMGFNVD
                     KGWFDKAKDFYQMAADSDRTELKQWWRETFRKLNTRTFDGLAPLKYAEDAAGDFDASVS
                     GYTAARMAAGAGAVSGVVWEHGLVRYNKKEGVTERIPGTGKADSLMGIFDALGNQRENF
                     LKWIAGHRSERLMAEGRENNFTADEIAYMKTLNRGNEALFADQKRKYDAFIKSILDLQQ
                     DMGLIDPESRVMWEDAWYLPYFREAENGEAHGPWTTRGVANQSSTVRKLKGSELTIKDP
                     IENLFNYVAKSVDASMKNEAMRRSVVNLADTGVVEVIEKPNKIDYERIGKNVVKVYVDG
                     QEQLVQVNDPDLYRAFTMIDMERSNSVFMKAARQAKRVLTIGTTAMPDFILRNFMRDSL
                     HSWAINKDGFRAGISSLQGLRKALATDDTLVDMMAAGATFGGGYLNAYDPTGSAANIRK
                     VLRRKGYSDSQMREFESTLVRSGKDVLDKLETAWEKYRHISEGAENANRVATYDAALKS
                     GKSKAQAAFEARDLMDFSMMGSSKLIIGLTDVVPFLNARLQGMSKLGRAIKDDPREVLK
                     RGGYIAGLSLALLALNWDDKRYKELPDWDKDAYWHFFLGDQHVRFPKPFEIGLMFGTTS
                     ERFVRMLGGEDSPGKFGKVIARNFLETMAFNPIPQVVKPMAEAYVNYDFFRGGPIESMA
                     DSNLIAAARYNDQTSLLMREIGAATGLSPKMLDHIVQGYTGTLGAYVLGATNIVARQFS
                     DAGETPALRLDELPVIKSFLRGSDPAKSTQFADDFYRMMNQANQISRTINAYREQGRKD
                     DASTLKTESAGLLSKRKMMTETQKAVRQLNDRIEMVRIDRTLSADEKRERINRMMAQRN
                     TLYQQAVERVNPYFDR"
     CDS             51735..52019
                     /codon_start=1
                     /product="hypothetical protein"
                     /label=hypothetical protein
                     /db_xref="SEED:fig|6666666.357098.peg.67"
                     /translation="MAVFIIRDAAGNIVLDLSNSITKTLGYFTVEPGISQSITIPDLYG
                     GRLWVSVSAEQIKFDIGVWSTPPSAVINGNTITVATTRDVRCFCVYGIY"
     CDS             52022..52741
                     /codon_start=1
                     /product="hypothetical protein"
                     /label=hypothetical protein
                     /db_xref="SEED:fig|6666666.357098.peg.68"
                     /translation="MAFVRVVNDSGITLIDSEVFNLYLSQKGQLTMNWDVNIGDCMVIT
                     YNAKSNLPPLLAISCSSHHASLLSVKKNGNVYTYTIIYVDSSSVNSAVIGDYYIFDVGI
                     LTRSGTGGLIIRNKDGYVTFDSDNQYLRVHSVESYAPSGWDELSGPVGADSVRGLPMGR
                     RFAAVTNKVGYVYTERINGGEVMSTWYYDGVRIASIGGNMSRHMELYQQSLYESGGANQ
                     TRNSSDSQYMIVDVTGY"
     CDS             complement(52728..52874)
                     /codon_start=1
                     /product="hypothetical protein"
                     /label=hypothetical protein
                     /db_xref="SEED:fig|6666666.357098.peg.69"
                     /translation="MKKEQALNSQNIWLVMHLNIHGLKEANSKIYQTVRTDFRSNKWFI
                     SIP"
     CDS             complement(53058..53222)
                     /codon_start=1
                     /product="hypothetical protein"
                     /label=hypothetical protein
                     /db_xref="SEED:fig|6666666.357098.peg.70"
                     /translation="MTIHPALAIPFGAAALMIAKKCRMDLNSDGSIVLGIIGFIALLTL
                     AMCIRSTIR"
     CDS             53215..53337
                     /codon_start=1
                     /product="hypothetical protein"
                     /label=hypothetical protein
                     /db_xref="SEED:fig|6666666.357098.peg.71"
                     /translation="MVIIMAVRMRQKIKIVDDIFPLGLGASLEAKKEKRAKKGQ"
ORIGIN
        1 gattgatttt ctgacatttt atcctgtatc tatatcttaa aagggcacta aaggggcaaa
       61 acccatttta aacttagagc cgttgattca acatgttgac ctgatccccg ctcatctcct
      121 caatccatct accatagatc tcgaatacca tctgagcgtt ttcgtggccc atttggttcg
      181 cgatgaacga gggatttgca ccggctgaca gcaaccaaca tgcgtaagta tgtcgtgtat
      241 ggtacggatt acggcgtcga atgccagata gttttacggc ggcgttccat gactgtccaa
      301 tagacgaaag tgagtagttt ttctctttcc ctttttgttt gcgaggctgg aaaacgaaaa
      361 tgaggttctg tgtttcagtt agaccatatt ccctgtgatg gtagatgatt ttttgctgct
      421 gccgataccc ggtaatgtct ttttgcgcgg acagtgcctc gatagcatga cttaatagtg
      481 aaattgtgcg aacgccggcc cgtgttttgg gagggccaaa gtgtcccagg gtggttaggt
      541 tgcgagatac atgaataacg cccgcgtcca aatcaatatc ttcccatgcc aaagcgcaca
      601 attcaccatg cctcattccc gtgtatactg ctaattgcca caaatttctc gcctgcccag
      661 acaagtgact gattaactgc tcaaactcat gcttgagtaa aggatctggg cgtggtcggc
      721 ttttctgtaa tttttttatt ccttcgaatg gtcttcccgt aataagatct gagcggtagg
      781 caaatcgcag tagggagcac aggagcgaaa tataattgtc aactgtccga acggttcggc
      841 cttgtttatt gctacgaacg gattcactgt agtatgtctc gccatgcaga agttgatagc
      901 gatatgctaa aatatcgttt tggttgatgc tatttatttt agtatctgtg ccgataatct
      961 ttagcaaggt atttatttgt gagccagttt tacgcaacgt gttggctgtt agttcaattt
     1021 ccctaacttt gagccaaacg ttagccagtt caccaaaagt ggatattttt cttgtatcgc
     1081 agtcttttaa tttttttgaa tttggaaatc tcttttgata atcgaattcc cctaaattta
     1141 tttcgcttac cactatatta cgcaagcttc cggccttttt tatatttgcg ggtgtgttag
     1201 accagccgat tagcacttct ctgcatcgct caccgtgata cataaaccaa atgcagatac
     1261 ttccgcttct tatttcaacg ccagtaggaa gttttgacat gtatgctcct tggttatgcc
     1321 tcttggataa gctgatttat tgcagggtgg ttgtaccatg tgataccgcg ctgtgttttt
     1381 tcgcctgaag gggatacccg cttaaaatga acgccctcga tccaacatcc ctggcggtat
     1441 cgttcaatct gacgctcatc gagacccgtc agatctttta gtgcatcctc aacaatccat
     1501 tcatggttaa aaacaatatt atttttggtc attggtcagt cctcggaaaa agggcatgcc
     1561 aaagacacgc ccttattttg gtcgttttat ttgagtaagg aaggggctgt ggttagtaga
     1621 aaatccagtt ttctgtttcg gcattatggc cgagattgta ttcaatttgc gcggatgaaa
     1681 aatccagctt tgccatttct tcaacgactg tggtgataat ggcaatgtcc tgctttagcc
     1741 gcattagatg atatctcttc cggcgcagca gactttctag cgctaattgc tgtgatggga
     1801 aagcaaaaga tcgctctgct gatcttgcaa ctttcttgat cgcgtatcgc atatatttct
     1861 ttttccatcc gtcgagccat cgcgccttat cccgatcgat atcgtaatcc ttagcccagt
     1921 gagcagggca tagaaaggca tagctattag tctggtggaa ggcaatatac tgctcggcga
     1981 taacttcaat tcccgccgct tgaacggttt caaaatatcg ccagtagaca ggatatccgt
     2041 tatgttctgt tttcgattct gggaacggaa ctgaccatga ttgaggcatg tgtttctcct
     2101 aagtttaggt aataaaaaaa tccgctgatt aggcagatcg gttattcgcc gtcattagta
     2161 tattcgagcc ggtctattaa acctcccgag cctttaacat ggcatcagcc atttcataac
     2221 tgttgtcagc ccagcggttc atcatatctt ccatctcttc tggtgctatc tgcgaaagcc
     2281 aggcttgcat tgcctttgct gcaaagtaat cgcgtaacgt catgccggtg aactggtaaa
     2341 ggtagttatc tccagtctga tgcatgcctg cttgcatact gattgggtta aattgtgttt
     2401 caacaggaaa cgctggccca cctccttttg gcatcataaa tcaccactca tttttattgt
     2461 ttggatcatg ttattcagcc ctccatgaat ggccgacgat ttcaaaatta tctctgcacg
     2521 gattatccaa tttcatgctg ttacactgag cgaattcaac atcgacgaaa ccagagatat
     2581 cctcttcggc tgctgaagct ggaatgtcta attccagggt aacgattatt gtctttgtta
     2641 aatcggtcac tccttttctc ctttgataaa acaaacccaa tgcgtattgc tgcgcttacc
     2701 ggataagtgg ccaaacgctg gtttttggtc agtcagtgcc agcacttcac ggatagggat
     2761 ttgcgtttca ttccacttaa acaccaacac gccgagcggc cgcagtaccc ggaacgcttc
     2821 agcgaatcca gtgcgcaggt catcacgcca tgtatccctg ttcaatgcgc cgtacttttt
     2881 gcgcagccag ccattctctc cggcgcgtag cagatggggc gggtcaaaaa cgaccaaagc
     2941 aaattgcgca ttgttgaagg ggagggcgcg gaagtcggcg acaatatcgg gatttatctc
     3001 caggctgcgg ccatcgcaaa gggtgtgctg ctcccggcga atgtctgtga atactgcccg
     3061 ggcatcgtgg ctatcaaacc agaacatcct tgatccgcag cacatatcaa gaatagggcg
     3121 ttggggtgac atagacattt acggctccca gcaatcaatt tcagcatcaa tgctgtcgtc
     3181 aatctcttcg atggtgatct cgccagtcag aaagtggagc gcctctttgg tgtagcgctc
     3241 acggttttca tcaaaataac gagaaaactc tggtgtccag ccgtatggat taccttgccc
     3301 ggcaaaatcg gccttggcgt tgttttctgc catttcagca accaggcaat cagcggtgat
     3361 ttttccattc tcccgcgcaa acggcttgat gtcagcttta caccagtaag gggaaatctt
     3421 tgagtcaccc catggtttca ggcgaatgcg ccagcgccgc tggcaacgtt ttatcaggga
     3481 tttactcatc gttttcgctc catgccggca tgatggtatc aacgggcagg cactggtatt
     3541 cagtgggcaa tttctgcgcc ctgatatccg cctcgcaatt tttccgatct ggatataccc
     3601 agccctgcgg ctcgtattgg cacggctgga atgtgtaaca gacaaaaaga aatagaccga
     3661 acaaagcggc ctccttcggg tttcattgaa tcaggggggg atttaccgca tcacggtgag
     3721 gatgcggtga tattgggatt aatagtcatt gggatagttg atgtcgtccg cttcgtcatc
     3781 gagcaccagc aggctatcac cgtaatacaa tgcacctacc attttctcga aggtgcttct
     3841 gaactgaacc ggcttcttac ccagcgcatc gttaaattcg agcttaccgt tgaaaagcga
     3901 ataaacaggg ctcccttcgt gcataacagg attgttgttg cgcccatctc gaacggtctt
     3961 ctgatgaaag cccagataga cctcgcactg atgcgctttc tctttctgct ctttgctctg
     4021 gtaacgatag gatctttcgg aagcgggttc cttttcaaac ccgatgtaga aaaagccgtc
     4081 acggtcgtca ttaacaacaa cctgcgggcg ttcccatccc tcttgctcgg cttcttcctg
     4141 atactgttca acataggccc gccacaggtc agatgccttg atgaacttcg gcaactggtc
     4201 ttgttcgatg aaatccttca ccagttcctg catctgcatt accaggcgtt cgctaacttc
     4261 attggtcttc cactgctcat caagggcgcg agccagcagc aggttatagc gcggcaggtc
     4321 agcgatttcg gtgatgttgc cgggtaatgc ctcttcgaga gccttcttca ccgcatcggg
     4381 aaatctcccc cagcggaacg tatcttcaat ggttttttca tacagcgccc ggacgtgctt
     4441 atggatcatg tcacggaact cttcagatgc ttcaaactga cggcagtgat cattgatagc
     4501 catcgccaga ctggttgcgt taacggaggg tgctgcttct gtaatatggg tcatgggtca
     4561 gtcctcaaat aaaaaaaccg catagcgcgg tcaaatgttg tcaggcggat taagcctttc
     4621 tggtaagtgg ggtatttgcc gtttcaatac tgccgttttt cataagttca gccataagta
     4681 gtcatattca atggcaaact tcgcaaccag caggcccaga gcaaaaccga tggcaaaccc
     4741 ggcatcaaac gcccctgcaa tagaaaaaaa ccgtttcatt caaaactcct ttcccagccg
     4801 ccccaagatc accgatttgg atggcaatgg cagttgatgg gctcgttgcc attgcttgcg
     4861 ttgtgtttgg gttttttggg ccagcaattt gcgaacatca ccaacaggaa tgccggtatc
     4921 tttggctatc atgttttcat tgatgcctag ccggtgaagc tggtacaccg ccagcataat
     4981 ggttgatgag tagtagcggc gcgcaccgat gcgtggcatg ggggagggca tccgggtgaa
     5041 cgtattaccg gtatagattg gcttgggctc aggtttatac ggttcgccca gtcgaattga
     5101 tgaccgcgcc cgcatgcgat gaataatgac gttcagccag ttgcagcgat cgtcttccgg
     5161 tttatagagg acgcctaaat gcaattcttc catatcaggc ggcctcgctg cgtttttgtg
     5221 cctgttccca atccttcacc aaccccatgc atttggcgtg cacctggcgc gcggtggcga
     5281 gcccgaaccc tttcacctta tcggccagca tttccggtgt gcggcgcaca atgtcgaata
     5341 acgaatagat gccagcggcg ctgaggagat ccagatactg ctctttcagt ggcagcgtgc
     5401 cggatagcac tgattcggcc cattcagcgc ggcgcaccag gtgagggtgg gtttcttcca
     5461 gtagctcgcg gatgcgtgct gtgacggctt catttagccc ttccggccag gcatccttga
     5521 aactctcaat aatgggatac atcgggacag cccaatctgt tacagacacg atcatgcaaa
     5581 tgccgatggt gctacggatt tccaggtgcc agtcgatacc attcaggatt gttacgtcat
     5641 attcagggga gcggagctcc agcccccact ggaaggtgta gaaataaaac cgcacgccat
     5701 tgctggcctg ccagtagcgt ggcgccacgt cgccgtcggc acgccgtaac cgcgcctgaa
     5761 catcgaccag atgccggttt agctcgtcgt tgagttgcac catgcctgag agccgacttg
     5821 tcttgtcggc cagttctttt tttagtcggc ggatttccgt caactgctgg tcacgcagtt
     5881 tccggctgtc ggccagctcc tctttaaggc gcacaagttg cgatttcatg cgctctggat
     5941 tgagcgattt caactgattc cgctcgtttg ccagcatggc attatcggta agcgccagct
     6001 tgtacctggc ggtgatgctg tcacgttcag ccatcgcttc agcggcactc agttcagcgg
     6061 tttcgatgcg ttcctgaatc tgcttcagcg ccaactcttt ggtggttaag gcgctacctg
     6121 tagtctccag tcgatcaagc aaagcgttgt attcgtcagt ctcctggttg atttgctcaa
     6181 tacacagggc ctgtgcttga ttcagcagaa ttgcggcgct ctctatagaa cgctgcgcca
     6241 tgccggtggt ttgggatgtc gccagatcaa gctgcgcccg aacagggcgc agggatgact
     6301 ccaacacgtc ggcgacggtt gttgtggttg tcataaataa tttcctgatg tgattagttg
     6361 gcgttagcct gaactgactg gatgtgttgc agcaatgcag tgcagatgcg tgaaaaatcg
     6421 cgctcgtgat acagttttgc ggatttgtcc gtagcggcat gcatgatgcc aagacgcgcc
     6481 agaccatcaa cagtcagaga gactggtgcc agacggtcgt tgatttgccc cagacgcaac
     6541 gcaggtgttt catccggctc aatctgcttg ctgctgctca ttgctatgcg acacggtgcc
     6601 gacggcgcca tgattgtcgt gctttccgtt tcgctggggg gctctttctg ctggcgttgt
     6661 tctgcttcca gtcgcgccgc ttcctctcgg cggatgcgct cacgttccgc ttccagtcgg
     6721 gcttcttccg cttttttgtg tgcatcaatg cgcgccgtta ccgccaattt gaagtcatca
     6781 aatggcttgg caaccagttg ttgcaggtca gccagtagcg cgcgatagtc ggcggcgttg
     6841 gtatccagcc atgccagctt cgtgcgcagg tcggcggcct gttggtcagc cgcgattttg
     6901 ccattcgcca gtgcggtgtc tagcttgtcc tgaatgctgg tcatggtttt cagtcccttt
     6961 atcgcacctg caaaatccgg cacaacgata tcaaggcgga caccgctaat ttcgcgctgt
     7021 agttcagtga cgtgatcggc aaatgcctga cgtgccgcga cgactttctc cgtgcgccgg
     7081 cgttctttct cactggccag cagtttctcg gccataagcc gattgtcgcg caccagcctg
     7141 gacagcatat ctttctggcg ttttgcctca tcaacacgct gaatttgcgc gagcatcata
     7201 gattctgctg cattcagtgt ttcctctgcc tttttcatag ccttgatttg caaatcaaga
     7261 tcggcaaagt cctgatcggt ctgtggctct ctgatcaatt tgttttcgat gaaatcgcgc
     7321 agagccactt cgaaaatcgt gaagttttcg cgcacctcaa tctggccgtt aacttgtacc
     7381 gtcaccgcag gcagatcttg caccgcctcg gccacaacag tcggagccgg ggtgggtaac
     7441 gtgtattcag ccagatcgcg atcgaactga gcccagccag cccgaatgcg ctcgaaccaa
     7501 ttagcatcag gcagcacttc catccagacc aggcgctcgg gtgtgccatc agataccgta
     7561 aaaatgacgc gctgtgcgcc cgtaaccagc atgatttgct ggcactgcgg catgtggtcg
     7621 tcggggagca cattgttaga cacagaagca gccaaatcgg tattccactg cttgtgctca
     7681 aacgcagtgt cttcaagcaa tgtcaggccg tcgcacgatg ccgataattt cccgcctcca
     7741 tcttcgtcag agcaggtgac aggatagagg tcatcaccaa tgattttctc aaccagcggg
     7801 cgggcaagtg cctcaacctc atgcccgtaa tcaagaatat ttttctttac ccagtcggtg
     7861 aatgctttag gcgtcccggt gtgtttaatg cgcagcaact cagatcgtgc gacttttttt
     7921 gacagcccca gcatggcggc tgcttcgctg gcgccgtggt gagttaggcg gaaggccgcc
     7981 cactcatcag tgccctggac aaggtggtga attttcattg ccgatcgctc ccattgttta
     8041 cccaagaggc aatctccatg cgctgcgcgt cggtgagttg ctcttttgtc tgaatcatgg
     8101 cgatcaggtc atcggccgct ttgccaccgt caatggcctt gcgccatccc gcttttttct
     8161 tctcgaaagc ggcatcactg catatgggaa gggcgttcgc ggaagaggtg gttgaatgag
     8221 cctgttcagc tttattttcc atgacgcttt tccatgaggc ttcaccgtca cgaattgcgc
     8281 catagatacc acgcaggtta accaactctg agggcgagca agtatcaatg ctgtggccta
     8341 aaaattcagt cagctctgac gctttaacgc cgatttctgc gaaggcatcg gcgatacgct
     8401 tgcgctcggt gtcggggtcg cgtgccgctt catctaatcg gatagccttg atgatggact
     8461 ctgcttcatc ttgcagatcg ccagggatga ttcgcagccc tagggtgcga atggcttttg
     8521 agatttgcgc cgatcgcttg ttcagcaggt cgtcatcggt ggcgggaacg gtgtagacgt
     8581 ttttattgta gctattctta cgcacgctaa tgtaactgcc gtcatcgcag ggctttgacc
     8641 gttcaactgt tttggttacg cgcacatcca atggataggt cagattggat tccaggtcgg
     8701 tcacagagac gcggtgtatc tctttgtggt catcctcaaa aatcatactg gtttctacca
     8761 atacgttcgt catgcagcgc agtgctacct caacgaatcg gatgcccaaa ccttcaacgc
     8821 cgttgccgat gggtttacgg taatacgcgc ttttgttgtt ggcaaagctg gggcgtcggc
     8881 attccttcaa caggtcttgg cgtacttgat cccactggcg tgggcggcga agtgccatga
     8941 tgtagcgggc ttcaaccatc gccttcgctt gtgctgccac cgcagtggca gatgtttctg
     9001 gcgctgccag ggtattgctg acgccgccaa aatcctgacg tacagtcagt gcttgagaat
     9061 cagtgaaagt catggtcagt ccttaattac agaatcaatg acagggcgga aaacgcggcg
     9121 agtacgatga tcaaagggaa catcacaccg ttcttctgct gcgggtggtg gtgaatattg
     9181 tggctaccga taccgtgccg gtattggatg tgtttaacgt agcgggtggt catggtattc
     9241 tccttgcgat cggattggtc tccgatcaac tgctgatgac ccttgtggtc attggtcagt
     9301 ccttaagggt tgtgcggttt ggtcgctgca caaccgggat agccccggcg tcagctgggg
     9361 cttttctctt ttcaggcgac aatactcagc ccggataact ccattgctcg ctcgatcatg
     9421 gtgacgcgac ggaatatctc ttcctgcaca tcgagcagat agttttctgt ctgaggtaat
     9481 tcgaccatcg caccaatggg acggtcatcg gtgccagcga tgtggcagcg atttttcagt
     9541 aataccttca tatcaccgat aagccgtgcg ttgcggtgca tattggtgat gcgttcggtc
     9601 aggatttgct gttcttccgg gctttgctcc agcctgctct cgtattcctc caatatttct
     9661 tcaatcatgc gttgatggtt gtaatcgttc atcagtgcct ccttgtaagt ggcctcactc
     9721 atgcgcccgc cggagcggac gcagggggaa aagctgctta tttcttgtct tcgttgatgc
     9781 gctgataggg gaagcgatca gtgtggggct tgatgttctt gtagaagtgg gagccgacag
     9841 aatccgcatc tttgaatgcg gcgaaatcgt cggcactcac attgctgtag tggtacaggc
     9901 tgcccggcac gttattgcgc ccattgaaac gaatggccag agtgctggtg gctgggtcgt
     9961 ggccgatgct gtggatctgg gatgatttaa cgggggtcat gttaatggtc attagtgagt
    10021 cctcttagtt tgcgtacata gttcatgcag taggtcgggc tgcatgtttt ccattcgttt
    10081 ttgtgttgca ttctctggct gggtgggtaa tacgcaactg ttccttgcgg tgtgcggaat
    10141 atcagcgtgt tattcccttc ctccagctct atgccgtttc ggataaaaaa cgctttaatg
    10201 cgtttatgtg cgccatcacg ggctttacgg cggttttctt ttagaaatgg cttgatatcc
    10261 ctgaagtagt caccaacatc acccatctgc tttacccttg aatttggtgc cgcagaatgg
    10321 gcaaaaattg atggcgattt ttgtgtcacc attcgtgcaa cgttgttcga gatcgccatt
    10381 tttcttacgc ttgcggtagc ggaagcggta agaaagcatg acgccacagt aatcaccttt
    10441 ttcgaggatg attaccctgt tatcgaagtc agattcatcc acttcggcac aatcgcttgc
    10501 tgctgcatcg cgcaatcttt tatccattgc cttcttggtt tcttgaaaac acttacaggc
    10561 cattgtccgc tcccgatttg ttcagttttt ccgttaactc cgcgatacat tcctgcgctg
    10621 cgcgcttata agctgcgcct gcactaccgc tgccgtactt ctcggtgaca cggttctcaa
    10681 acacatcgag cgggccgaaa aagcagcctg cggcaatgtt gaagttgccc tgcgtccaga
    10741 ccgcgaagat cgtgcgattg ctgtagccgc agtttttgcg ccaggagata ttctggatgt
    10801 gctcaacatc cagatagaga gattcgcagg taaggttatc gggcagcgcg gtaatctgcg
    10861 tgccgctcaa gtccagcccg ccgccgacgg taaggctatc gggcagcgcg gtaatctgcg
    10921 tgccgctcaa gcgctcgaca cccctctaaa tcaaggtgat aagggatagt tacagaaccg
    10981 ttagcattaa cgatgtgttt aataccgcgt ctttttagaa gagaaacgaa gtcagtcatt
    11041 gaaattttac cttttttcaa gcaataaaaa ggccacccga aggtggccgg tgtgttgccc
    11101 tggtgaggcg taaaactcgc ttttcaggcg aaaaaaaagc ccaccgaagt gagcttgatt
    11161 taggtattta gtaaaccccg tgagggatgg tgctacatcc gcgcattttc tggcgaccaa
    11221 tggccgtgta gccggtatgt cgttcaggat tttcactgct ttcgagcgct ttcttcggcg
    11281 cagggcaaac ctgcatcttt ttgcagcact cggcgagtag aatagccttg cccacacgat
    11341 cgcttttgcg tttggcgata cgttggattt tttccatgca ctgcctggtc atggcggtgc
    11401 gacgtttttt acgtggtttg gtcattggtc agtccttaag ggttgtgcgg tttgctttgg
    11461 ggtgtggtgg ccggtactga tatccgactc agggctgcgc gccgcttttc atagcagatg
    11521 ccagttgctg caccctaggg ggtctaccag cccggttgtt tccattcgcc gcgcatcagc
    11581 ctgcgcattc accacacccc aaaaaaaacc agccacactc cgcagtggcc gcgcccatgc
    11641 ccttgggtca gtcatcgcgg ttcgtctctg ctccccgctt gctataacca gtacgtgatt
    11701 ggccgccacg ttgcgtaccg gtgcttcttt tcttattaac cctcaccaga tgcaaagctg
    11761 gctccctctg gggactcgga gcgacatcat tactgtcaca ttggcacaac ttgccgcagt
    11821 ctatctgcgt tactacttca tttttgctat cctcctttgt gtcggtaact cacatgttta
    11881 gccgtagccg tcgcaccggt acatgcagac cgttggtgtg tgcgacttaa cctgactgtt
    11941 aaagagcgta tccggttggg atatggagta gtttattgaa tacttaactt tagtcaagtg
    12001 tatgcttttt gataaactga aaatttcaaa tatcattttg tttttaaatg aaaattattc
    12061 tatgagcgat atgtgaaatt catcgaatct gcgataaaga ggggggcacc agctcgatga
    12121 gtgggcgata aaaactattg agtagaggta taacaaagag ggattgggtg cgttgcagga
    12181 gaggcttacc gcaacgagtt gatcagtcag ttcctttgat ggatatgggc cttggcagaa
    12241 atatccggcc tggcattaag agttatccat acaattttta caccataatg taaaaccatc
    12301 agcccggttc ccatttttat aaaagcttgt tttcattttt ctttttttac atttagggca
    12361 atacttcata tgttgagtat tgcgtggcgc gctcaaacat tcatcacacc aggttgtata
    12421 acccccctcg tgcttgctgg atttcctgaa tttatcatag gcaagatttc tgctgcatcg
    12481 tgggcaaact ttcttacctg cattcgcaga tgattctgcg ctgacattat ctgttgttac
    12541 agggcgttgg gtaatgggtt ttgatgctgg acgcataggg tgagtgattg taattttagg
    12601 tgcggccact tccttctcct ctttcatctt gcgagcgaac tcgtcttcga gctggctgag
    12661 tgttgagcgt ttttctgtgc tgacctcagt aatggtaggg attggggcta atggggctgc
    12721 tttcccatac ggcgcggcat actcagtatg ctcatgtttg atcgtctggg tgcgttcaat
    12781 acggatttcc cccgtactgg ttttaatagt gttggtttgc cgaataacgg tttcgtctgt
    12841 gattttggtc ttttttttgt ttaccagata gataaccgca gctgcaatcc ctattacgat
    12901 ccaaaaatcc ataattgata acctattact tggtttgcct gtccttcctg gtcgtgttat
    12961 ccgggcaatt taaactcagg caaatcgacg atattctacg gtctggccta tcagcacttg
    13021 tgcgacaatg tggaattgat cttcgtcgcc cgcctcgata aaccatggtt tgtatttttc
    13081 gttatcagat agcacggcca atttgtcttt catcatttgc agccgcttga cgtgcagggt
    13141 atttccgaac acgaaaacgt aaactccgtc accgttaaat gcattaaccg acacatcgac
    13201 aaatgcctgg tcgccgggat tgatggttcc agccatgcta tcgcctgaga tagttatcat
    13261 cttgataacc tcagatatac gacctccaaa taactggcgt gcttgctctg tcgtgaattc
    13321 aactgcggtg atggtttcga tatagtcacc ggtgacaatg acaccggggc ctgcactagc
    13381 cctaatatcc atgacatcca cacgataatg ttctacagaa tcgcctgatt ttgatacgta
    13441 agattttgac agctccatgt ctaaataacc ggatggcatc gcgtaatcac gctccagcct
    13501 tctggccgct ttttcgccaa aagacgcctt cccacttaaa agctgggata taaaactttt
    13561 ctctttttcg gggatcgctc tctccgaaaa ccattctttg aggcgagcac gcctgatctc
    13621 tttgatatcc ataaagacat tttgattagt attcattaaa caagcaaact cttgactttg
    13681 gtttagtgat aactaaactc ggctctaaac aaagaagagg tttccttcca tggagttaaa
    13741 aacatacatc aaaaatttgg agcgaggtgg tgctaaaaaa ctggcagcca cgctcggtat
    13801 ttcacaatcg catttgtcgc aaattgcctc tgggcgctgt ccgatatcac cagaacgatg
    13861 tgttgatatc gaggtggcga cagcaaaatg cgtgagcaga caagatttac gcccccatga
    13921 ctggagcagg atatggcccg agttaatatc tcaataaacc tggttctgac caaaccagaa
    13981 aaacagtaac gttaaggact gaccaatgac cacaatacat cgacctgccg gtgatacggc
    14041 aggggctgcg atcgcgtccg gtgttcgcaa ggaattgctt tcacgcaaaa aagtgggcaa
    14101 ggctggcttg ccgttccacg acgtgcgcga agaccagatc aaaacccgct ggacggagag
    14161 cgaggctgcc accatcaaaa gcgtggcggg tgccatgtcg tccaatcctg ccgttgaaac
    14221 caataccgca gcgatccggg gctttctggc gatgttcgcc gaatcaccag acatgctcac
    14281 tcatgttcac cgcgaactga ttgccgccgg tttgccaatc cccgattggt tgccgccgtt
    14341 gccggagagg gcgccacgat gaagcaatcc tacgaaaccc aaatcagcac cacacaaagc
    14401 gtggatcttg tcgccagcat cgttggcggc aagctggata tcgccgggga agaaacccgg
    14461 cgtctggcca tcacaggggc tttgtctcac gtgacgcgcg cgttttattc gcgtcaggtg
    14521 gtgacagttg agttgaaacg aacgcggcgg tgaatcatgg aaataaccaa accccttaat
    14581 cgccgctacc gggataaaaa cggcgtgatt gtgcatgtca cagggtatga gcctgcaacc
    14641 cagcgggtga ttttcactcg ccccggatat gagcatccat gcgcccgccc gctgtggcag
    14701 gtgcagaagt atttcacgag gcttgatgta tgagtagcaa gctgcgttgg ctattcgtgg
    14761 atgtatttca tccgcaagat ctagagggac gccatgagca gaatcttcaa catcgtcagt
    14821 gaattgacgg ggcaacgtaa tagcatcgtt atccctaggc cactattgcg gttcttttcg
    14881 ctcaagggcg aacagcaagc ggcacaactg gctatggtgc ttgggcagtt aatttactgg
    14941 tctggtaaat ccaagctggc ggatggctgg ttttacaaag agcacgccaa attaggtgaa
    15001 gaacttgagc ttagtgcacg gcaggttcaa cgcattgtgg aaaagctgga gcttcacatg
    15061 cctggcgttc tgacaactgg tactcaccag ttaccgagtg gcaagacagt caagcactac
    15121 catctggatg gtgaggcact gatagggttg attttccctg agcaaaaaac catcgataaa
    15181 ccggacgaaa acccaccgac attgccggtt gggaattccg aagatggaaa tccgggaatt
    15241 ccgaagatgg aactgggcga ttccgaagtc ggaattccct atctctatgc agttaattac
    15301 atacaaagag atgatctaac gatcatctct aaatattcgt ctcagcgttt ttcgcaagcg
    15361 aatgaggcga cgaaagcgaa agccgataag tttatctcgc accacccaga cgcggtgatc
    15421 ttcacgccag cagggaaagc atggggaaca ttcgaagatg tcaaagccgc cgtctggatg
    15481 tacgaaaaaa ttctgacctt ggacgcttca gcgaaaacgc ccaactggcc agaatgggct
    15541 aacaccatcc gcctgatgcg gcaacaggac gggcttacac accgggaaat ctgtgaagcc
    15601 ttccgctggg caaatacgca tgagttttgg caaagcaaca tcctcagccc cgcaaagctg
    15661 cgggtgaaat ggggtgcgct gaaaatccaa cgtacaaacc agatcggtaa gcaacaccgt
    15721 gaagagctgg attgggacag cactgattgg gctgacgggc tgggggggct gatatgaaag
    15781 ggattcagtc aatccaacgc catatcggta atcgcaacgg cgcagcgctg gcggctatgt
    15841 cggcaccgca gcaaaacgca atctgctttg aaccggatgc caatgtacgt cagctattca
    15901 acagcctgtt tcagcaactg cgggtgatct ttccggcggt gaacgcgcat atcaagacgc
    15961 aagccgaact ggacgaattg cgccagcagt ggacgcgagc atttgccgag aacggtatca
    16021 acagcccagc gctgatccag atgggattac ggcgagcgcg cctgagtgaa agcccatttc
    16081 ttccatcacc aggcctgttt atcgcttggt gtcgtgaagg tggctctcag ctcgccggcc
    16141 tgccggatgt cgatgcggtg atggaggaat ttcagcgcta tagcgcccaa cgcggattct
    16201 acgccacacc agaatgcttc ccttggtcgg cgccgatcat gttttggctg gtgacggata
    16261 tgcgccgtgt aatgttgcag tacaaccaca cgacaggtga gatgcgcaaa gtggcagaac
    16321 gcctgctaaa gcaatgggaa aagaaagtca tggcggggca gccaatccca gccccgaaga
    16381 cgcaacttga cgacttacga cgtccgccaa ccataggggc cgagctgggc atcgccacgg
    16441 cagaaactga tgtgaggggg caggaatttc taaatgcgat ccgggcgcgt tacccccgga
    16501 gaaacacaac gaccaatgag gactgaccaa tgaccatgat tttcaagaat gcgctgattt
    16561 atcgcctgac ccgcgatatc gcattcgatg atctgaacga caaactggct gtttttacct
    16621 ttgcgccatg tggcagccag gacagagcga aaaccggctg gatatcgccg ctgggagtgg
    16681 gctatagcga attaatccac caggctaacg ggcagatcct cctcacgttg cagcgtgaag
    16741 aaaaaatcct gcctgcgcca gtgattgcgc gtgagctggc agcgaaaatc gacagtatgg
    16801 aaaccgtgca acagcgtcgc ctgaaaaaaa ccgagaaaga tgcgttgaag gatgaagtta
    16861 tccaaacgct cctgccgcgt gcgttcagta aataccatac cacccaaatc tggattaacg
    16921 caggggccgg gttaatcatc gttgatgcgg ccagcgccaa aaaagccgaa gacgcgctgg
    16981 cactgctgcg caagacgctg ggatcattgc ctgttgtgcc cttgatgctg gaaaccccca
    17041 ttgagttgac actgacggag tgggtacgct ccggtgctgc gcctgctggc ttcgccttgc
    17101 aggacgaagc cgagctaaaa gcggtgctgg aggacggcgg tattctgcgc agtaagcatc
    17161 aggatttggt cacagatgaa atcgccgggc atatcgaagc gggcaaggtg gtgactaagc
    17221 tggcactgga ctggcaggag cggatcaact ttgtgctggg tgatgacggt agcctgaaga
    17281 aactgaaatt ctccgatgtt ttactcgagc agaacgacga tatcgaccgg gaagatacgg
    17341 cacagcgatt tgacgctgat ttcgtactac tgacggggga attgtcggcg ctgatcaaca
    17401 gtttgattga tgcgctggga ggggaggctg accgtgtggc accagagcca gaaaaccacg
    17461 atttgcaaga tgatcggctt tacccagagg ctgttcagtt tgtgcaatct tcgtgccggg
    17521 cgacaatatc cggtctccag cgccatttcc gcatcgggta taaccgtgcg gcgcgcttga
    17581 ttgaggcgat ggaaagcaaa ggtgtagtct ctgcgccgac gcatgacggc acacggacag
    17641 tgatcgggga ggcggtgcaa tgaatacgcc tatcgtgatt gccaatatcg ccattcgtcg
    17701 cgacactgat ggccgttaca acttgaatga tctgcatcgt gcgtctggcg gagaaaagcg
    17761 ccacgcccca agctactggc tggcgaacaa gcaaaccata gcgcttatcg ccgagctgga
    17821 aactaccgag attccggtag ttaggcttga gggccgcaac ggtggcacct tcgtgtgtcg
    17881 agaactggtt tatgcctatg ccatgtggat tagcgcgtca ttcaacctga gggtgatccg
    17941 cacttttgat gcggccgcta atccgaaccc gacggcggag aatgtccgtg agcgagttca
    18001 ggcggggatc atgatcgtag agtctgccgc ccgaacacta aacctatcta acagctcaaa
    18061 gctcggtgca tatcaaaaac tacaatccat tatcggcatc aacctgatgc ctaactacgc
    18121 cattgatgca cccagtgacg cggcggacgg ttccagccgg acaacaaaag cgcttaccga
    18181 tttgttacgc cagcacggtt tcaccatgac ggcggcgatc gcctatctgc ggcttgaggc
    18241 ggcgggaatt gttgaacgta aaacacgctc cagcacgggc aagaaaacca aatcgttctg
    18301 gtcgctgaca tcacaggggc tgcgttacgg caaaaatatg accagcccgg ctaacccgcg
    18361 cgagacacag ccacactttt tcgaatctcg ggctgatgat ctgttggcaa tcattgcggg
    18421 gagggatgcg gcatgactga tttctcccaa accgagtacg tgcaggcact gaatgctcag
    18481 aaagctgaag atgcgcattt actgaaagat gtaggcgatc aatggcgtac accggatacc
    18541 cttttttggg gtatcaatgc catgtttggc ccgctggtgc ttgacctgtt cagcgacggg
    18601 gaaaactcga agtgtccggc gtattacacg gcggaggata acgcgctggt gcaggactgg
    18661 tcagcgcgtc tggctgaact gaacggcgca gcgtttgcta acccaccgta cagcacagcg
    18721 aaaatgcatg agggtgagta catcaccggt atgcgccacg ttatggccca caccgccaaa
    18781 atgcgggaac gtggcgggcg ctatgtcttt ctcatcaaat cagccacgtc tgaagtctgg
    18841 tggccggagc acgccgatca cgttgcgttc attcgcgggc gtattgcgtt tgaggttccc
    18901 gcctggttta agccgaaaga cgataagcaa attcccagta gcgcaggttt tggcgcagct
    18961 atcgcggttt ttgataaaga atggcgtggc ccttcagtta gctacattca gcgggaaaaa
    19021 ctgctggcga cgggtgacgc gttcttggca cagatccggc gagaagcggg gcggttagta
    19081 cctcagcagt cgatcatcat tccagagaca gagaatactg tctggccatc ggaagttaat
    19141 ttcctcttcg agcagatccc ggcagcgatc acgctgcctg ctggcctgca aaacaaactc
    19201 cgcagtcata tcaaccgcct gaaactcgaa ggcgtaccgg attcggcaat tatcacgacc
    19261 gcagaaacat tatccgtagc catgggagca gcagcatgaa aaataacagg gaaatcgtcg
    19321 ttgataactt tgcaggtggc ggcggtgctt caactggcat tgagcttgcg attggtcgca
    19381 gcgttgatat cgcgattaat cacgatccga atgcgattgc gatgcacgcc acgaatcacc
    19441 cagacacgct gcattactgc gaatcggtat ttgatgttga cccggtggcg gcgacggctg
    19501 gtcgcccggt ggggctggcg tggttttcgc ctgactgcac tcacttttca aaagcgcgcg
    19561 gcagtgcgcc cgttaaaaaa gaaattcggg gactggcctg ggtagttctg cgctgggcgc
    19621 tggccgtgcg cccgcgtgtc atgatgcttg aaaatgtggc cgaatttaaa acctgggggc
    19681 ccttgcttac tgacgcggac ggcacacgtc agccagaccc cgtgcgatca ggggaaacgt
    19741 tcgcggcatt cgtcggcatg ctgtctgatg gcgtagccgc agatcaccca gcgttagcag
    19801 aatgctgtga attccttgga atcaccattg atagcgagcc tgcgcaacgg ttggtgcgtg
    19861 ggttggggta taacgtagat caccgcgaat tacgagctga caattacggt acgccgcagc
    19921 gtcggaagcg gttttttatg gtgattcgct gcgatggtca tcctatcgtt tggcctaaac
    19981 ctacccacgg tgatccgaaa tctctggaag tacaagcggg gcaactgaaa cagtggcgga
    20041 tggcggcgga ctgtattgac tggtcgatta tgtccacatc aatatttgaa cggaaaaaat
    20101 ctttagccac aaatacgtta cgccgcgtag ccaagggatt gtggcgccac gttctcacca
    20161 atgccgaacc gttcattgtt ggagctggtg gccctgaata ttctggtaag ccagtcgcta
    20221 tcaatcagcc tttcggcact attgctactg aaaatcaccg tgcggtggta acgccattat
    20281 taacaccatt catcaatgag cacgcgaatg cgagcagtca gcgtacaatg cctattgatg
    20341 agtccatgcg gacgctctgt gctcaagtaa aaggtggcca tttttccgtc gtggcaccaa
    20401 cgatgatccc actgcgtgga acgaatgagc accaactttt tgggcatagc atagagcgcc
    20461 cattatcaac agtaacagcc agcggtgcac accatgcgct gattaccgcc agctttggag
    20521 aattgtgcgg tacaggtgcg cggcgctgga gtgatggtat tcgctcgctg aaaacaccac
    20581 tgaacacggt tacagccagt gctgcgccga gcgcactggc aatggcgcta ttcgagcagg
    20641 caaacggcgg attctacgac ggcgacggac atgcggcaga cacaccagta tctacgctca
    20701 ctgcctccgg cagtaatcaa cggctggtga cagcctatgc ggtcaagtac tacggcactg
    20761 gagatagagg gcaatccgct gacgaaccaa tgcacacaat aacgactaaa gacaggatag
    20821 gggttgttag tgtggtgacg gttcccgctg actgcctatc gccggatctt cgggaaaagg
    20881 cgcgatgctg tgcggaacta ctgcataaat tccttccaga gcatttttgt gaacttgtcg
    20941 aaatggtgct gatggcatac tgcggcacat ggtatgtact agttgacatt acactgcgta
    21001 tgctccaacc gcaggaattg tatgcggccc aagggtttcc tagttggtat gtcatcgaca
    21061 tggactatcg cggcgtgcgg cacacgaaaa cagcccaagt cgcacgctgt ggtaatgcgg
    21121 tgccgccgca gtttgccgaa gcgctggtgc gtgcaaatct gccagaaatg tgcgccgagc
    21181 gtgaagaggt ggccgcatga caaccgctac ccgcaccaaa tcacctaaga agcacaaaac
    21241 cgaagcgctg ggcgtactgc tgcccggcgg tggtatcaaa tactgtactg atcatgaccg
    21301 cgacgtaatg aaaggggtgc caatcggcac cccgatctcg ctcacaccta tcggcgaccg
    21361 ccgcagcatc aagcatcacc gcaaattctg ggctctgctg gatctggggt tttcgtattg
    21421 ggagcctgcg tggtcgtttg tcagcgatcg ggagaaatgg atagctcatg aggtgtctaa
    21481 agaagtcgct caggaggcgg gtgatccttc tttgtatgac aacgttacga ggattattgc
    21541 tgaaagagtt ctggagcggc taacggcaca gcttaagcgc cgttttgatc ccgaagcagt
    21601 taaaaccaaa gatgcctacc tgaaccacgt gatggtaaag gctggatttt acgacctggc
    21661 accgaatccc gacggcggca cgctgaaaca gcgctggagt atcgcgtttg tgaacatggg
    21721 gcaggagaaa ttcgacaagg tatatcgagg tgtatttggt gtgatctgga atgagacgtt
    21781 gaaccagtat tttgctgatg aagcagaaat ggaaaacgcc gttaaccagt tgatgaattt
    21841 ttgaggactg accaatgacc gataatgtgg attttccaga cgatagtgac aacgttttgc
    21901 agtttaccag gcgttttgat gacaatgctg acatcaaaga gatgcgaaat tttgttgagg
    21961 caccaaagcc agaagggcgg acatgtcgcc atgagcgggt tgtggtttct gaacatgagc
    22021 gttcagtcag ttgccgcttg tgcggcgcag tgctggaacc gtttgatcac ctgctggctt
    22081 tggcgaagaa agaaacccgt atcgagtggg agctaaccgg gttacgccat gaaataaagt
    22141 cgcacagaga gggattggaa aagctgaagc gagaagaggc gaattgtaaa gggcgactcc
    22201 gcaacgctca aaatcgcctc agtgatatca acgggcagat ccatgcggcg aatcaggaac
    22261 tgcaatttgt gctgaaacgg gtcggtgaca taagagcgat caaggagaaa ggccatgctt
    22321 aagtccccgg cctatcgttc taaatccctc cgtgattctg cttgtgggct tgcctgtaca
    22381 ttgcagatcc caggaatttg taactgtaac agagaaacaa cagtgctatg ccacttacct
    22441 agcctaacgc acggtatggc ttataagtcg gatgacttct ttgcggtatt cggctgttcc
    22501 tcttgccatg atgtgattga tggacgcgtg ccatatggct ggcggccggg tgaaaaagag
    22561 gaaacgtatc tggccgcgct gcacgcgacg tggcgcatct ggtttgatga aagcctgctg
    22621 gtggcaaaag gaggtcggtt tgcgtaattc aattgacgct ctggcggtgg ttggcagccg
    22681 ggcaaaactt gagatgcatg gtggtggcgt gtgtaaggtt tgtcaccagc ccgaactgga
    22741 ggagcaggcg gcacttatcc agtgggcgaa actggctacc atcaatggca ttcgccctgg
    22801 taactaccta atccacattc ctaatgaggg aaagcgcggg ccaaaagcgg cgagagacgc
    22861 caaacgactg gggatgaggt cgggggttca cgatttattc ctggcattgc catgtggtgg
    22921 atatgctggc ttatggatcg agatgaaggc ggcaggtggt cggccgacgc cggggcaatt
    22981 ggaatggcaa gagttaatgc gcatggctgg ttacagagct gaaatttgct atggatttga
    23041 ttccgcacgc aatgagatag aacgatattt gcagaatatg aaatgttctg ctgttaatcc
    23101 ctgattttgc aacgctcgtt catggtctat agaatcagcc tgtgacaaat aattgcagga
    23161 ctgaccaaat gaccatagcc atagaacaac tgattaaaat gcacgatccg cgctgcatga
    23221 gtattgaatc actcaacgtc gggcgcggac gtgcgtccct gtccaaagat caaatcttgg
    23281 gggcgctcgc gaccgcgcaa cgccataact caacaggcta tgatgtgctg atggcgaaat
    23341 accgccacga caatcaggcc gagcagcgga tccgtgccgc aattacagat tgggcaaaga
    23401 ctcattccga tttagagcat gcagagagtg cctgtcaatt ggcacttaat atgatgctgg
    23461 agcgtaattt gccagcccag ataaatcaca tcagtaaatt gttgtgcaaa tacgggccga
    23521 gattttcgca ggtgcgcaag aatattgatt tgctgcgtgc tgaaattaag cgcctggaaa
    23581 aagcgcgcag ccaggcgaaa accgcagata aggaatatca tctgatcggt cagcaaattg
    23641 tcgcattgtc agcaagggtc gatgcggaac gccaagggct gaaggcatgg gccacccagc
    23701 aggcgatgcg cagtaatctc tgcccccggt gcagcggtac tggccggacg catagaccgg
    23761 tgattgcact ctgtaatgag tgtggtggtg gtgggcgcat tacggcaacg tatgagcact
    23821 tgcgggcgtc gctggctaac ataggggctg tgataacaac gggagaatgg ccgcagtatt
    23881 tggcgctggt gaagcagtgc ttgcgttggt tgtatgttga agagtctggt gcattggata
    23941 ttttgaagat gcggcttaga gatgaaataa ttcagtaaaa attttatttc ttgcagggta
    24001 aaacatgaaa aaatggattc tatcactggc atttttttcg atggcagttt gttaatccga
    24061 tgactaattg cctcaacaat tacacaattc ccaggattgc agaaaaaacg tcacctaaag
    24121 agatcgttga tgaagcttat gctgtctgca aaaaagaagt aaagacatgg caggaagggc
    24181 gacgggattt gtcggaggag atgcaggttc agcataataa agaaatgtat gatttttaca
    24241 tcagaatgat cgaaataagg cgcaaggcaa ctcataaccc gaattgacct catcacgcat
    24301 acgcgctaaa tttgcgaaag ataccggagt gtgccttaaa aagctgctcc ggttttttat
    24361 tggtcagtcc tcaagccgca tggttcgccc agcggctttt ttatttcaga cagcgcgccg
    24421 acctcagggg aggtggagat cgtgaagatg caaaacaatg ttcatacctg gacggacttc
    24481 tgggatttgc tccgtatgtg gtggaacggt gatatgccgc tcggcggcgt actgttgtcc
    24541 atcctgatta ccgttctgcg ggttgcgtat atgggcggtg gccacaaaaa aatgctgttg
    24601 gaggcggcgc tgtgcggtgc gctgacgctg acggtgattt catcactgga gtatttcagc
    24661 ctgccgcgaa cgctcactgt tgcgattggc ggcagcattg gctttatcgg cgttgagcag
    24721 atccgcacgc tggcgctgcg cattcttggc aaccgctttg gcggcaataa cccacaggcg
    24781 taaataccat gactcagaat ccaccacggc ataaaaattt atccgcattt ctggatatgc
    24841 tggccttttc cgaaggcacc gccacccacc cactgacgcg taaccgtggc tatgacgtga
    24901 tagtcaccgg tcttgatggc aaaccggaga tctttactga ttaccacgat cacccgtttg
    24961 ccaatggccg cccgggaaaa attttcagca aacaggggct gcgctccact gctgccgggc
    25021 gctatcagca gctctatcgt tattggccga cgtacaaagc gcagctaaaa ctgccagatt
    25081 tcagccccga ctctcaagac tcgctggcga ttcagttgat tcgcgagcgc cgggcgcttg
    25141 atgacgtgat cgcgggccgc attgagcgtg ccattgaagc gtgcaacaac atttgggctt
    25201 cgttgccggg tgctggttac ggccagcgcg agcataaggt tgagagactg attgccgctt
    25261 atcagcaagc cggtggggta ttagcacaag attgattgct ttttgttcga aagtggtggc
    25321 tctacgtgaa atctgcgctg ctcgccttca tcaatccttt ctgatttcaa caggacaatc
    25381 atgttaacca cgaaaatgaa agcgctgctg ttatgcggcg ggttggctgc tgcattcggc
    25441 gcgggctggt atgtgcaggg ggtgcgctgg gatgcggata tttcggcccg ggaaacggcg
    25501 gctgcacagg aggcaagcac cgggcagcag gccgtcatcg caacacaggc gctgacgttt
    25561 catcgtttca acgaaatcgc cagacaagcc aaccagtacg ctatcaacat taaggcaaaa
    25621 tcagatgaga aacagattat ttaccgcacc atcgtcaagc gcgatccggc tagccgtcag
    25681 tgcgtgtctg atgatgtggc taacaggctg ctcgactacg cgcacagtct acgtgccagc
    25741 acaatgcaca ccactgccag cggagttgac ccagccggta ctggtgccgc tgcctccgcc
    25801 tgccgattga cgtatgggca ggtgatttac tgggttgatt cgctgctggc agtaattgag
    25861 caggcaaatg ggcaactggc tgggattcga aaaacagaat aaaagatgtt ctgtaaaaaa
    25921 agtagggttt tcttcgatat tagatgtggc aataatatct ttcttaatgg cttggactta
    25981 ggcttatatg gaaattgata ttggcaattt tacaccagta gatggcgtga acgataaagc
    26041 ggtttatgct gaggccacca tctacacaga tcctgcgcag ggtggtgaaa acgtatctct
    26101 gtaccttcgt ctcccgtacg acccaaattt aacgatagga gacttgcaac ggctgacaaa
    26161 attagaagct ataaagaaaa tgcgagctgc ggctgactgg ctctctgaga ctgaatagcc
    26221 aaaaatgccg gtattccgag taaacgccag cgatacctaa cgttagcaag taagatttag
    26281 caaccatttc atacgcctca gcatccgctg gggctttttt tcgccccaac aaaaggtaaa
    26341 cccatgacac agaccagcgt attaccacgc taccgctgcc ataaagttgt tcaggcagcg
    26401 aaaattattg atgtgaaccc attagataac ggtaaatcat cgctcactct ggatggtgat
    26461 attttgcttt ttgccgagcg cgggtacatc gaaaaacata acccacagcc tggtggatat
    26521 tttgttctct atgaggacgg ctaccaaagc tattcgccag cagcggtatt tgaggcgggc
    26581 tataacagac tccccgaact cggcggcgac gttggtgaca accagcagga gattgagaac
    26641 cgaaacatcg agcgcgccgc gcgtgctgcc cacgaagtca atcgggcgta ctgcgcagcc
    26701 cttggcgatg atagccaacc agcctgggaa gatgcacccc aatggcaaaa agactctgct
    26761 attgaaggcg tggtattcca cctcacaggt gatcacccgc cggaggctag ccataacaaa
    26821 tggctggagt tcaaaaaaca ggaaggctgg aaatatggcc cagtgaaaga cgcagagaaa
    26881 aaagagcatc cgtgctttgt cccgtatgag caacttccca aagagcagca ggtgaaggat
    26941 tacctgttcc gcgctgtagt ccacgcattc aagtgattca gacattacag agctacttcc
    27001 cagaggtggc tcgctaatgc tcattcagta ggacgttatg gcgaagtacg attggaaaaa
    27061 actgctggcc gattatgccg ctgcatactc agcaacggga atatctccag ttgagtggtg
    27121 cgctcagaat gaggtgccct atagctcggc gaagcgttac atcacgataa aggctgcaac
    27181 ggatttcatt gagctgaatt cgcaaattcg cagttcgcaa aaaagtgatt cgcagattcg
    27241 caaagagaaa ggcgcgaatc gcaaaagcga gaaaaagcgc gatgattctg gtgataacga
    27301 tatggaggaa tcagcaggca cagacaacag tgacactggc gattgtccgc ctgaaacgaa
    27361 accgcaacgg gatgctagcg ggcgctttgc tgaagggaac aagctgggtg ggaattatgg
    27421 cgttccggct aatgcgttcc agcctggcaa tcaaatcccg cgcaaacatt ccgcctacgc
    27481 caaatatctg gacgccgatg aacttttcga tgcggccaaa gaatccgatc tgcgcgacga
    27541 actcgtattc acccgtgccc gtgcgctctc tgtcaccaag acgttgaaca aaatcatgga
    27601 ggatttgcac aacgcaccgg atgttgaaac ccgcatcgaa ctatatgaca agttgctcaa
    27661 agctgaggcg gggctggatc gcaatattgc ccgcattgaa tcgattgaga acagcctgag
    27721 ccgattacaa ctggatgcgg tgaatgtgcc acgcctgagt gctgatacgc tgcgcattaa
    27781 agcggccacc gccaagctga aagccgagac cgagaagctg acagcagaaa gcaaagacgt
    27841 gacgacaccg ctaactgatg tggtgcgtga tattcacgcg atgccggatg atggaatgct
    27901 ggcgcaatga cgacaccgca atatgacgcc ggtttggtgg atgacgaact ggatggcatg
    27961 accgaggcgc agcagcgcct ttttattttg tccaaattga gcaatccgtg gtggcggctc
    28021 aacaatctgt acaagataga gaacgaaaag ggccagttgg tcacgtttcg gatgcgcccg
    28081 gcgcagcgtc gtctgttcca ggccatgcat taccgcaacg tcattctcaa ggcacgccaa
    28141 ctgggttttt ccacggcgat tgatatctac ctgctggatc aggcactgtt taacaccaat
    28201 ctcaagtgcg ggattattgc gcaggataag accgccgcag gcgaaatctt tcgtaccaag
    28261 atatcgatac cgttcgacaa tctgccaggc tggctacgct cgacgttcaa aatcaccgag
    28321 cggcgcagcg gtgcgaatgg cggttatatc ctgttttctc acggctccag cattcaggtg
    28381 gccacgtcgt ttcgctccgg caccgtccag cggctgcaca tctcggagca tgggaagatc
    28441 tgcgcaaagt acccggccaa agccaaagag gtgcgaaccg gtacgctgaa cgccgtgcat
    28501 gacggctgta tcgtgtttga cgaatccaca gcggaaggcg tgggcggcga ttttcatacc
    28561 atgagcatcc gcgcgcttga actggcgcaa tccggtgtca gtctgacgat gcaggattac
    28621 aagtttcatt tctatccgtg gtttgacgat ccgaaatacg ttgcgccagt gccgaaaggt
    28681 ggcctgcgcc tgagtaaata ccatcaggaa tactttgctg cggttgaagc agcaacgcgc
    28741 gtcacgctga gtgatgagca aaagcagtgg tatatccgca aagaggtcga gcagggcgag
    28801 gaaatgaagc aagagtttcc ttccacgcca caggaagcat ttctgacctc tggccgtcgc
    28861 gtgttcccag ccatcaacgt gatgaatgct gaatctggct gctgcccgcc gcgtattgtt
    28921 tacgatatcg atccggtaac gggcaaacgt gagaaagttc aggcgttacg tgcaggtggt
    28981 caagatgagc tgcaacgcac gttgctgaat cacctgctgg tgtgggagtt gcccgaccct
    29041 gacggggatt atgctatcgg tgctgacgtg gcagaaggcc tcgaaaacgg cgaccgatcg
    29101 tcgtttgacg tcgtgaagaa atccgacggg gagcaggtag cgcactggtt cggtcatctg
    29161 gatgcggaac tgttcgcgca actgctggca cacgtcggca cgtggtacaa caccgcctac
    29221 gtcgggccag agcgcaacaa ccacggccat gccgtattgc agaaactgcg cgatatctac
    29281 ccgccccgag ctatttacgc cgagcagcac cttgatcgcg ataacgacga tgagacgccg
    29341 aaactgggct ggctgacgac caaacaaagt aagccgattg tcaccgaagg gctgaaaacg
    29401 ctattgcgtg aaaaggccag cggcattcgc tgggttggca ctatcaacga attgaacacc
    29461 tacgtctatg acgccaaagg cagcatgggc gcacaaaccg gttgtttcga tgatcaggtg
    29521 atgagttacg ccattgcgca agagatgcgc gcccgcatgc cgaccagacc gaaactgaaa
    29581 cctatcgacc gctctaaacc cactcactgg atgtcacatt gatgaataca gccgctattg
    29641 aagctgtggc cgagcctcag ccgcaggata accgcgatcg ttttactcag cgccaactgc
    29701 tggatatctc atcggacatt gacgcacagc cagactggcg caccacggcg aataaagcct
    29761 gtgcgtatta cgacggcgat cagttggcac cggagctggt ggcaaaactg cgtgagcgcg
    29821 ggcagccgct caccatgcat aacctgattg caccgaccat tgatggcgtg ttgggcatgg
    29881 aagccaagac gcgtaccgat ctgatggtga ttgctgacga cccggacgaa gaaatggagc
    29941 aactggccga tgccgtcaac gccgagttcg ctgatgtgtg ccgcctggcg aatatgaaca
    30001 aagcgcgctc tgatgcctat gccgagcaga tcaaggccgg gttgggctgg gtagaggtgc
    30061 ggcgcaacgg cgatctgttt ggttcccgct ataaggtcgg gacggtgcac cgcaatgaag
    30121 tgttttggga ctggcacagt cgggaagcgg atttaagtga ttgccgctgg ctgatgcgca
    30181 aacgctggct ggatgtggat gaggtgaagg caacctttcc cggaatggcc gaggtgattg
    30241 attactcgat caacgcgtgg cggggatttg tggataccga tattgccgaa gggcaagaat
    30301 cggcgctgat tagcgcgtat gaggaatatc agcagtggag ccgcaaggat accgagtggg
    30361 tgtcttccaa ccgcaaacgc gtcttgcttc aggtgattta ctaccgcacg taccagcaat
    30421 taccggtatt agaattgccg aatggccgga tggtgcagta tgacaaaaac aacctcatgc
    30481 atgcggtggc agtggcatcc gggcgcgtgt cagtggtgat gtcacgcgtc agccggatac
    30541 gtgaagcctg gtttgtcggg ccgcattcta ttggggatcg gccatgcacg gcaccgcaag
    30601 gcatgtttcc gctggtgcca ttttgggggt atcgcaagga taagagtggt gctccgtatg
    30661 gtctggcctg ccgtgctatc ccggcgcagg atgaagtgaa ttttcgccgc atcaagctga
    30721 cctggttgct tcaggccaag cgcatcatca aagatgccga tgcggtcaac atgacagacc
    30781 ggcaactact cgatgaggcc gaacgcccgg acgggctgat tacgctgaac cccgatcgca
    30841 aaaacaaaac gactgccgct gatgccgtta atattcagca ggatttccag gtggcacagc
    30901 agcagttttc ggtgatgcag gagagtatgc gactgattca ggatggcatg ggggtgtatt
    30961 cggcatttct cgggcaggac tccagcgcgt cctctggtgt agcgatcagc aatctggtgg
    31021 agcagggggc cacgacgctt gcagaaatca acgataacta tcagtttgct tgtcagcagg
    31081 tggggcaatt gctgctgtct tatttgctgg aggatttgac ccgccgccgc aattacacgg
    31141 tggtggtgaa ccgtgatgac ccgcgccgcc ggcgagcagt caccatcaat caggagtcag
    31201 aaaacggcaa cggtatgact aatgacgtat cacgtctgcg tgcgcacatt gcattggctc
    31261 cgattcagca gacaccggcc tacaaatcgc aactggcgga acgcatgtct caggtaatta
    31321 ccggcttgcc gccgcaggcg caggcgacag tgctggatat gtgggtggaa ctgctggacg
    31381 tgccgcgcaa agccgagttc attgagcgca tccgcagcgc gctgggcacg ccaaaatcac
    31441 cgaatgaaat gaccccggaa gaacagcagg ccgcacaaca gcaacagcaa ttgcaggccc
    31501 agcagcagga actggcgatg cgggaaattg ccggaaaagt ggcaaaactc gaagccgagg
    31561 cgcagcgcat tgccgccgcc gcccagcgcg agcaggtgtt agcgaatagc cagcgttttg
    31621 atgatgccag aacacaagcg gaaaccggcc gcattcttca ggagatggag agcacgacgc
    31681 gggaaatgga tgcgctgcac ggacagataa tgcagacaat tcaggcacag atcgacgcga
    31741 ttgccgtcta gatattgcac tgagagggga tacgcgctaa attcgcgaaa gatgccggag
    31801 catgccttaa aaagctgctc cggtttttta tgccacaaaa tcagcgcccg ccattcggtg
    31861 ggcgtttttg tttgtgcggg taagcgcctt ggtgacaggg cgctgattcg cacaggcagc
    31921 gatacgcctc aatccctcgg atctatccga caaatagaca ggcaggagtc ataaaagtgg
    31981 aactcgattt aacaggtaat gaaaccccgg aagaattgga agcgttgctg gaaaagattg
    32041 gcgaggtgac tgtcgatgat aaaacggcac cgggaaacac gtcagcggca gtcactgata
    32101 ctacagtcac tggtactaca ggtgcgcaaa cggcgacaac tcaggcagcg gccagtcagc
    32161 aaaatacggg cgataacggt agtaacacgc cgacgccggg cgtggctgta gggcaacgaa
    32221 gtgcggcttc aggtcaggcg actgacacag agcaagcgac ggcggccaaa atcctgctca
    32281 gtaaggacgg caaacacgct attccttacg acgtgctgga agcggaacgc gctgaaaagc
    32341 gtcgtcttgc ggaaagcaat cagcgcaccg ctgctgaact ggcagaagcc cggcgccagc
    32401 ttgaggtgtt cacgcgccag attaacgccg ccggtttgca gcccgcgcaa ttacctgaga
    32461 aatcgcagat tactcaggag caacttgatg ttttacgcga gagttttccc gatgttgcta
    32521 acgtcatcga tgtactggcg cagaaagtgg aacacttgca agccgtgcaa ccagtacctg
    32581 ctgccacgca atctaatgag agtaatcctg tgtcaatggc gctggacgct acaccggatt
    32641 tgaaagcctg gcagagtgat gacccggatc gtttcacgtt ggcaatccac atcgatgaaa
    32701 cgctgaagca cgaccctgca tggaaagaca agtcattaac tgagcgattc ggcgaagtcg
    32761 tgaagcgcac tcgtgctgcc tacggcgaaa cggttgagag tacacctcaa cagtccgcgc
    32821 cagcaggaca gccagcacaa ccgacgcccg ccgaacttca gcagaaagcc gcagatgcgc
    32881 tggcaaaggc aaccgctgcc gcgcagctcc cgggctcacc gtcagatgtc ggccaggctg
    32941 caacgcaatc tccctcgcta ctggagcaag ccgctaacgc cagcccggaa caactgcacg
    33001 ccatgttttc cggtatgacg gatgcgcaga ttgaggcgtt actggaacaa gccatctgac
    33061 gaacaccgta atcctatagc ccgccatcgt gcgggttttt catttttagg gaatcaacat
    33121 gacaacgatc acttcatctc aggcgaataa gttgatgcag gttgcgctgt ttaccgcagc
    33181 caaccgcaat cgctcgttcg tcaatatcat gaccgaacaa caggaggcac ccaaggcagt
    33241 aacgcccgat caaaaaggcg tgaagcaaac cagctatacc gcgccggtgg tgcgtattac
    33301 cgatttgcaa aagcaaaaag gtgatgaggt ggacatgcaa atcgtccaca agctgtcaaa
    33361 gctcccgacc atgggcgatg agaagctggc tggacgtggt gaaaacctcg catttgctga
    33421 cttctcactc aaaatcaatc agggccgcca cctggtagat gccggcggca agatgagcga
    33481 gcaacgtttc aagcacaacc tgaacaagac cgcgcgtgtt ttgctcggga cttacttcaa
    33541 cgatctgcaa gaccaatgcg ctacggttca tctggctggc gcacgcggtg atttcattgc
    33601 cgatgacact attttgccgc tggccggtca cagtgaattc ggcaaaatca tgattaatga
    33661 tgtgctgccg ccaacctatg accgccactt cttcgccggt gacgccacca gcttcgaagg
    33721 gctggacgcc gccgacctgt ttacgttagg tgtggtcgat aatctgtcac tgtttatcga
    33781 tgagatggcg cacccgattc agccgatcaa aatgtcgaaa gacgagatgg cgaacgaaga
    33841 cccgtattat gtgctgaacg tgacgccgcg ccagtggaat gactggtaca cctcaacatc
    33901 tggtaaggac tggcaggcca tgctgtcgcg tgcagtccag cgctccaagg gcttcgatca
    33961 cccgcttttc aaaggggagt gcgccatgtg gcgcaacatt ctggtacgca aatacaccgg
    34021 gatgcctgtc cgtttcaata ccggttcgca ggttgcggta tccaacaatg acctggcggc
    34081 aacagttgcg ctgaaagagg caaaaaccac catcgaccgt gcgctactgc tgggcggtca
    34141 ggcgctggcg aacgcctacg gttcgggtga ggacggcggg cacttcggct acaacgaaga
    34201 gaaggtggat cacggcaacg gcaccgaggt ttctatccgc tgggttaacg ggttgaaaaa
    34261 aatccgtttc aagcagaaag acggtcgcat caatgaccac ggcattatcg tggttgactc
    34321 tgcgattacc acgcctcgct aactactcat tttttggaga gatgatatgg caataattaa
    34381 gtcgccctcg ttacgtgatg ctatctatca gggggccgaa gggaatttct ctatcgcaga
    34441 gagccaggtg gttctgaaag ccgctgctat caatgatgtt gtcgagctgc ttgaaatgcc
    34501 gatcggtatg cgcatttacg gcgttgatgt tatcagtgac gcactgggtg caaacgtaac
    34561 gctggaaatc aaaagtggtg acaaagtgct tgttggcgcg gcggcacatt cggcagcggt
    34621 cgcgaaatca gtccccgtga caccgtatac cacgcagact gaccgagaga aggttatcgc
    34681 aaccattgcc ggcggtgttg ctaccggtag tctgattgtc ctcgtcaaat acaccgttgt
    34741 tggttattga tgtgttatca ccaaacccgc tgcaatggcg ggttttctgt tttaaggagt
    34801 ggattttatg gataccatct cgcttgtgta catcggcagc aaagacaaga agcgcgacac
    34861 cataaccaat agtcggctaa tttttccgcg tcttgtcccg gttgatgttg atagcgcgat
    34921 agctcaccag ttgctcgcgt ttcctacagt atgggtacgg gagtcagatg ctggcgctgt
    34981 gcttaaacaa catgaagagg aagaagcgct aaagacagcg cggatggccg aagagctggc
    35041 gcggttgcaa gctgaggctg acgccaacag ttgggtagtg acggtcggga atgatgatgt
    35101 tgacctggcg aaactgacca ccgtccaatt aaaaacactg gttgaagcgg aagatctgga
    35161 tttgaaacag ggtgcgcagg aaaaagccga cgcattccgt gttcgtgttc gtgatgccat
    35221 caaagcaaag gccacagaat aatggcagcg cttgacgttt ttctcccgtc tgtccgtaag
    35281 catattgccg gcccgctgga tatcatgatg cggcaatcaa tacgcgaagc agcgatcacc
    35341 ttttgccggg aatcattatt ctgccgtgat atcgtgttgc tgacgaatgt acagcctggc
    35401 gttgcgtatt cactaaccgg gagcccgctg gtgaaatgcg tcaagcgttt actcataacc
    35461 aatctaagca gccccgatac acccagtgaa ttggatgccg gtacggattt tacggtgatg
    35521 tcagccaatc atctggtatt cagccgtgca tatagcagta tttctgtgct atttgcggta
    35581 gagccccggc gtgatgctga tgaagtgcct gacgcattag ctgatgatta tactgacgtg
    35641 gtggcggccg gagcgctgga agacttgtat atcatgccgg gcaaaccatg gagcgatcca
    35701 cagcgtgccg cctatttccg cgccattttt actgaggggt ttcgccgggc ttaccgcgat
    35761 gctcttgata actctcccgt tacccgcact cgaaatcctg ttcgacgaca tgagttttac
    35821 tgatgatcac aatcaatgac gttattggcc gggccaatgc ccagcttgtt gatacacatt
    35881 ggctgcgctg gtctaaatct gagctgttgg attacttcaa tgatgcgatt aacgctgtca
    35941 ttatcattcg ccctgatgct ggcgcatcgg tagaggtatt tgcctgtcaa ccgggaacac
    36001 ggcagcagtt gcctgatggc gcgcttcgtc ttttagatgt catacgtatt gttggtgggc
    36061 gagctattca ggtgattgcg cgcaatatgc tcgactacca gtatccagac tggcatacct
    36121 tgtctgggcc aattgagcgc tattgttatg atgagcaaac cccgcgcacg ttttatctgt
    36181 tccccggtgc cacatcaggt gtttcgcttg agattagcgt atcgcgccta cctcaggctg
    36241 ctgccattgg tgatttacgg gctgatgtta gcagggcatt tcccctcgat gagctctata
    36301 tcaatccggt gctggaatgg attctgttcc gggcatacgg caaagacagt gaaaatggca
    36361 actacgctat gttgtcctct cagcattacc aaacatttgt cgatctgctg ggcgttaagg
    36421 cgcagaccga tcaggcaatg ggacagaaaa aacaggtgca atctggcggg ggagctcaat
    36481 gagcgtattg ataagcggtg tgttaattga cccggctggc atggttatcc ctggcgctga
    36541 aatcaccttt accgctataa cgaatgggca ttctgtccta aatggttttt cggcctctgc
    36601 cacgaccaat ggccgaggcg agtacgccat ttcactcgag ctatgtgatt attccatctc
    36661 agttcagtac gcgggtaata acgccgttta cggctcagtg tctatcaaca aggataccac
    36721 gccgacaacc attaacgact tgctggaaaa aacgaggctg gagcaagccg ttacgccgca
    36781 aattattgtc tatttccgcg agattcaggc agatgttaat cagaagcttt ctgtcgcagg
    36841 aaacgcagca tcatcggcgg cgaacagcgc gaatgcatcg gcggcatcag cggcatcagc
    36901 attgcaagct gcaaacaatg caagtaatgc agcgggtatc gcatccaacg cagcatcatc
    36961 ggcagccggt agtgcagcaa cggctcaaaa atctgccacg caggctgagg tgtgggcaaa
    37021 aacaattgat gtgtcgaatt ttgcacaaaa agatggcaca ggaattaatg ctgccagttt
    37081 tcgcaataat ttagggttgg ggaatagctc aacacgtaat gtggggacat caagtgggac
    37141 ggttgctgct ggtgacgatg ctcgtctggg aacaataggc ggtcgaagcg gtggagcggt
    37201 aataggagag gttatcgccg gtggcgcatc tcctgcatca accccagtgg cgggaacata
    37261 cagcaacggg gttgcggtgg gatcgagatt tttatctgga gtgtatagtg acgtgtcatt
    37321 tttcatctat ccgcaggttg ttcagcaagc agcggcggcg gcaaagacgg gaatactcca
    37381 actgagtcac gacaacacgt atgtggcctg gatgtttaat agctcgggtg tagcgactgg
    37441 cgcatcgtgg tctccaacat ctgatgaacg gttaaaaaat ctggatggcc cgatcaccga
    37501 gccactgcaa aaaatgcggc ggatgcgcgg ccagacatgg acatggaaaa caaacggcgc
    37561 gttcggtatc gggattactg cacaagatat tcagcgcgta tttcctgagg ccgtaattga
    37621 aacaaacgat gttaaattac cgaacggcga tgttgtggag cgggctctat cccctgatac
    37681 gtatggcgta gcagctgcgc tgcatcacga ggcgatactg gcgctggctg acaaaatcaa
    37741 tgagcaagaa agtttaattg aagcgctatc ggtacggttg tctgaattgg atgcacgcta
    37801 aattccccaa agataccaag cctcgcctga cagcgaggct tttttgtttc ctcctcgcac
    37861 caactccagg gctttagcat ggcaaccatt gatatcacag cgatgcgtgg tgaaatgcca
    37921 cgcgttgtcg aacacctatt gcctgatgcc aactcaacgt tagcgcaagg ctgccatttc
    37981 aggcatggcg ttatcacccc tatgctggat gatgtcgatc aacagaagag tttcgccatc
    38041 aaaccggaaa cgctctttcg ttaccgtgac aatttttggt ttgcctggaa taaggctgtt
    38101 gatgtgatac gcagcccggt ggcgaacgat gattatgggc gtgtttatta cacggatggt
    38161 gattttccga aagtaaccag cgcgttaatt gccacaaagg gaagcggaaa ctatcccgcc
    38221 gcattttttc gccttggcat tcccgcgcct gccaatccga ttacagtcgg tgcggtgaca
    38281 ccaccagcag gcgttggcag taatgatccg aaagatgatg aaacgcggta ttacaccgag
    38341 acctatgtaa ccgcatacgg cgaagaaggg ccgccgggcc ccgcatcggc tgaattgacg
    38401 atcgcctatt cggggagctc ggtggagtta cggctacagc cacccggcca gcaaaaccac
    38461 aacatcacca agcggcggat ataccgatct gcgacgagta gcgagtcggc tgattttttg
    38521 ctggttgcgg aattggatat tgctgtggcg acattcatcg acaacctgtc tgaatcccaa
    38581 cttagcgcgt cactggaaac ctacggccat aacatgcccc cagatggcat gattggtcta
    38641 tgtatgatgt cgaacggcat agccgccggg ttcatgggca atcaggtgat gttcagtgag
    38701 gcatatctac catacgcatg gaaggacgcg aacaagcaaa cgacgcgaga tgagatcgtt
    38761 gcaatcacgc cagtgggcac gacgcttatc gtgggtacga aagggatacc gtatgtgttc
    38821 tcggggatca cgccatccaa tatcacgtcc agccactccc tgatcgcgct gtcctgtgta
    38881 tcgcgcaaaa gtatggtcac aatggacggc tttgccttat atgcttcgcc caacggactg
    38941 gtttcaatca gcgccgacgg agccgctgcg atcgccaccg ccaatatcat agaagcgaaa
    39001 cagtggcggc agcgctttaa cccggcgtct atccgggcgt ggcgggtgga aaatgagtat
    39061 tttgccctgt atgacacgga ttccggtgtt gccgggttca tcttcgaccc ggtaaatatg
    39121 gatattcgct atgtggcgac atcattcgat gcagcctata acgatgaatc gggcgatacg
    39181 ctttacattg tcaaaggccg ccagctttat accttaaata cgggcgtgcc ggtgaatttc
    39241 cgttggcgat ctaaactgtt ccttgcgcca tcaaatacct cattttcgtg cctgcgtgtg
    39301 atgagcgata tcctgccatc catcggtgta attctgtatg ccgataagaa agtggtgatg
    39361 caattgccgc cgggcagcct gagggagaca ttgctgaaat taccgccaat gcgtggcaaa
    39421 cgctggcaga ttgaagtgta cggcaatgcg caagttgacc gcattacact gacaacgtca
    39481 atgcaggaga tgccagcatg agcagcacca aattcagggc cggcagagac caggaggcgg
    39541 ttgttgaaaa tattgagacg ttaaccgggc agcgcggtga tggacgaaac cgggcagtta
    39601 cgtatggtga tttggcaggg cttgggctgg cgaatctgcg tcaactgggt ggcggcaaag
    39661 tcgcattatc accaggcaat gggctcggcg gttcaggctc ggggggcgga gtgcagaagc
    39721 caactaaacc gacaggtttc aaggcgaccg gtgggtttgc ttatgtcttg cttgaatggg
    39781 atatgccgaa ttatcgtggc cggtcattaa ccgaaatata ccgatcgcct gatgataatt
    39841 tggctgacgc ggtgctcgtt gccagctcgg cagctggtgt atacggcgac ccggtagacc
    39901 ccggctggag tggttattac tgggttcgcc atgtcaattc tgaaggcgac cccggcccat
    39961 tcaacgatgt taaagggact catgcgcaaa cgcatcccga ccctgctgtg attattgatg
    40021 ttattcgcga tcagttaaat gcctcgccat tgatagaaaa tctgtcgcga agcatggaag
    40081 aaaataaagc tgccgttcag acaaacaaag aaattatctc acgaatagat aaaaacgggt
    40141 cggccgcata tcaatcactg tggaatacca aagcacaggc gggtgatata aaggcgggta
    40201 ttggcattgt tgcaggtcgt gatgcgaacg gtaatacaat cagtcaggtt gccgtggctg
    40261 ccagtcagtt ttttattttc gaccctaata acccgaatga caaaaataca tacgctattc
    40321 cgttcgctgt ctcagatggc aaggttgtga ttgatgaggc agtgatgcga actgcggtta
    40381 taaaaatact ggccgcccag agcattattg ccgatagcgt gagggcgggt attcaaattg
    40441 tgtcgccgta cattaaaacg gcacgaatag agagtggtgg ttttacggta gatccattgg
    40501 gaaatgcaac gttcggtgag ttggtacgta tctctgcatc aggagaattg agcattcgat
    40561 catctgtaga tggtcgagga atgaatatat ctaataatga gatcagaatt atcgataaaa
    40621 atggtgtcga aagaatcaca atcagtagcc gtgacagata gcgggaggag tgcattgaat
    40681 cgtgcgctgt tgcaactatc ccgacgagta gagtatgagt ctggggatac taatttattg
    40741 agtaatatcc aaaacgcctg ccgtaaaaag caggcgtttt gctttggtac ggaggatacg
    40801 cggattgtcc tcaggccccg tagctaccac ggtattccgt atgtggtggt gtggttgggt
    40861 gtcagcacca aaaaagatgc gctggcgtat tggctgcccc atgttcagga actcactcgt
    40921 atggttggcg ggcgttgggc tgaattctat acggtcagga aggggtttat ccgggtggcg
    40981 cagcggctgg gttttgagcg gttgccagac gagtttgggc tgatgaaatt caaaatagct
    41041 gtatgaggtg atgcatgggt aaagggggcg gtggtagcac cgaagttaaa gagacgacgc
    41101 aacagatggc tgcggcagag gtggccagca agcaatggaa tctttatcaa aatgaactga
    41161 agccttatga aaatttgttc atggagaaag tggactccct aaatgacggg cagaagtacg
    41221 gaaatatcgc aggggatgtc aatcttggct atcagcagga atttgcgcga acgcgccggc
    41281 aggccgctga cggcctggca tccgttgggg ttgatccgag tagcgggaaa tttcagtcgg
    41341 cactgaaaga tattgccact gaccaggtgg cgggaacgat tgacgcaact aaccgggcac
    41401 aaaccgatca gcaaaataag tatgttgctg ggttgcagga tgttcaggcg atgggatcgg
    41461 ggcagaaggc cgaagcattg caggggtatc aggggatcgc ggcggcatcg cagcagaagg
    41521 cgatttctga tgcacagagc gcactatcta aacagcaggc cagcaaagga ttgattggta
    41581 cggttggcgg cgcgctggtg agcaaaggat tatccagttt tccggcaaaa acacccacaa
    41641 ccacattaag tagtggtaac tccagtggcg tatttggtgt ttcggatgtg ccttttatga
    41701 gctcgaattt tagaaatgta ggtggttaat catgggcgta gcgtcagaca cattcgcaga
    41761 tattacgcgc aaacagtacg acgactggat gcagcgttac taccctcggc tgcaagggtt
    41821 gatggagcta tcaaccagtg ggcagttgat gaataaccaa ttggccagag cggatgccac
    41881 acaacagcag gcgctaaaca cagcaacagt cggtgcagcc aaccaacagg cccgctatgg
    41941 cgcaacgcag cagaatggca cggataatag cctggggcta aaaacagcgc tggcaacggc
    42001 gggtgccaag aacggcattc gggatgcaga aaccgatcgg cagatgagca tattaaccgg
    42061 cggctctaca gggcttcgcg agcttctcaa aatcgggagt gaaacataat gggatatgga
    42121 ctgatagata tcgcagcaca gacgcgccag caaggtatgc aaggtatgca gcaagccgct
    42181 gaacaggaac agcagcgtga agcagcgaat gagcagttaa aagcccagca aaaggcagca
    42241 gcaaaccaaa cgaaaggtgc gatggctgga atgggggcgg cgggtggtgc ggctttaggt
    42301 gcgtcatacg gttcatgggg tggcccaatt ggcatgggaa ttggggccgc cgttggttta
    42361 attgctggct cattgttttc gtaattgggg gatttatggc ggatgtgcgg ggattggctg
    42421 atggttttct ggccgggttt aacacgatgg acggtgcgct acagcgcaga gaggaatcag
    42481 agttacgtcg cttacaaatg caacagcaac aacagaacgc agatcgcagc tttggattgg
    42541 cgcaacagca atttgattac ggaaaggaaa ctgataaacg gaattttgac aggcagactg
    42601 gtctggataa agaggatgcg cgccgttttg gattgaatca agcgctggag caacagagac
    42661 tgggcattca gcgtgccggg gtaggcatac aggcgcagga gctgagtctg cgacgcgatg
    42721 aactgacgta ccagcgaaca gaaagggagc gtcagcgccg aatgaccgag caaatgccaa
    42781 ccgttcaggc attctatgat cggctgaaaa ccaacaatgg ccaatgggat gaggatgcat
    42841 tacgtctggc cgggcaaatc tcagatgaca acccgtacag ccccaaacga tttgttggcc
    42901 cggacaaaat ccagaccgtt cgcgacatga ataaaatcat gccacaggtg atgagcgggc
    42961 aggtggatta caatgatccc caattcgtca gtgtggctga taaggttctg gcaccgtaca
    43021 tcaaacgtgg gctaggtgag aaagacccca gcacggggaa aaccattaag gacaaggaat
    43081 tggcccatat tgggctcact gaggatggaa acggcatttt cctgtccgtg aataccaaat
    43141 ttgatgatgg ttcagtttca aaaatgaagc caatgacgcg atatgcctca tcagatccgc
    43201 aggataacgt tgtggttatc cctcttgata aggctatggc acaattcaga ggttatgggc
    43261 agatggtggg agcgataaac agcgacccgt caacggcgca attcatgaat cgtctggtaa
    43321 acggcagttc taagcaagat cgagcggaag caaaggaata tcgcacccag gccattaact
    43381 cacaaaaaga acgtgcgaaa gcactggcga aagacccgga taatgcctca acaattaata
    43441 cccagtttga caagctggat gaccagattg ctgagtcatt tgggcaaaaa accaagaata
    43501 gaacggcccc agccttacaa caatgggcag gtaatgatcc cggcaaagtg gcgtttgcgc
    43561 agaaagcgtt atctgctggc gcgtttacag gtgatataaa ccctgcacaa ctggatacga
    43621 aatatgctga atatcaaaaa ggcgtctcgg tacctaatac tcagaataac cagccaaaaa
    43681 acaatgacag ctacacggct caatatttgc gaggaatgca gaaggtagag caaggtaaat
    43741 aggttttttg tagtatggta attttttcaa cttcatagag tggttaaatg aaaaagatag
    43801 cttgcttatt ctttgctata tctgtacttg ctggttgttc aaatcatggt cgggatgata
    43861 atcaggcgtt gagattgaat gcggcatatt catctgatta ttatcttcca cagagtgtat
    43921 ccatccttat tgctgagtcg aaggtgttaa gtgaaacact tgttcttgct gttgatttaa
    43981 agcgaattaa cgacattaga ggcacatatc gtgcttcacg acctaaagtt actgttaatt
    44041 ataatgtttc gcctgtcgat gagagcaagt gccgtattac atatagcggc acaattaact
    44101 acctgtcgtc attaaatatt cacacttata atgggctcac gacaattggg ggtaatgcta
    44161 tccagaacgt taatatccca accagaacag cagaggttca atatggaaag aatgttgagt
    44221 tcgccttgga tgaaaatgtt aagttgaatc tctcagtcga gaaagaaacc aagtagttta
    44281 tttacggggt gggcactggc ggtgcccact cattaatgtg cagattaata aaaacatacg
    44341 tggcagttaa aatttaatgg cgtttctcat agtgatttcc tgttctggga ttatagtatt
    44401 tcccgccttt atgggatgaa ccatgtccac cagcataatg ccctccctta gcgaatgatg
    44461 cagcggggga aagtaacacc attactataa gagagatgat gattttgttc acaatgtttt
    44521 ccttgaaaat agtagcaatg aaataattag taatagccca ttaaatgggg aaagaaaaat
    44581 agcaccatgc aatatacaca ttcataaata gatgtgaagt aattttatgg atacgcgttg
    44641 ggttatataa cgttgttttc tgatgtatct gatttgttta ttctctgctc ctaaaaccac
    44701 atcgttaaca gacttcccac gagagccaat acgcgctaaa ttccccaaag ataccaagcc
    44761 tcgcctaaaa agcggggctt tttttatgcc tgaattctgg agtgacaatg gcctacgatc
    44821 cacagcagtt acagcagcag cgccctgaac agcaaacggc gaacaataac cggcagggac
    44881 tgaatattca gcaacccggt gagctatccg atttcgatcg ccagttcttt tctcctgaaa
    44941 actggaacaa aaagccggtc gaagccagcg tgacgcttgg cgatattgtg aaagcggcag
    45001 tcgccgcgcc actggatatg gtgtctgccg gtggcgagct gttcagagca ggcaaccagc
    45061 ttcttgatga taaagcagat gctcaagcgc gggagtacca aaaacaatat ggcattgatg
    45121 accaaaccat ggcggttatg cgccagactg cgggaaaccc gttatcccgt gcgggcagtg
    45181 ccattattca gggcgtcggc agtctggctg gcgctgcgtc acagaagatc aaagactcct
    45241 acagtgacgg agcaaaaaaa gcggcctctc tggattttgt aagcgcagaa cggaacaagg
    45301 aaggcaatat taccgggttg cgtgccggag aagggttgtt cgataaggat acctggctaa
    45361 tcaatgccgt gccgaccatc gcgcaattga ttagcggtgg ggctatgtcg aaagttgggg
    45421 ccagcgctgc gcgagagatg gcggagcgcg cggctttcaa tcgtctcagc aaatctatgc
    45481 cggaagaggc tgcccgtcag ttagcaaagg aaacggctga tcgtgcggcc gccgttgcag
    45541 gtaaaagcac ttttgttggc accatggcgg cgtctgctca ggggcagggt ggcattgaca
    45601 tgcgcaacga aatcaatgcc ctttcatttg acgaacttac gcagagcaag acatttcagc
    45661 aggcgttttc agacgttgat tctgatccgc agtatgccag gctggatgat acgcagaaat
    45721 tgacgcttgc acgcaacatg gtagccgatc gcgcggctac ggcggtgacg gcagacccac
    45781 gactgctggc ggtaaatatc gccgcctcca ccctcggaga tcacaccctg ctgtcattgt
    45841 tgacgaagaa aggggcagcc agtggcgtgg catcaggtgt tgcggctggc gctctctctg
    45901 aaggggcgac tgaatttgct cagggtgcag ggcagcgcta tgtccaaaac cagcagttga
    45961 tcggcactgc cgggcagaaa atcgacccga tgaaagatgt gttggaggtc ggggcgaaca
    46021 atgccgttgt aggggcgggc atgggtgggg ctgctggtgc tgttgggggg atgcgtgggc
    46081 accacgccaa tcaatcgccc gatagcacgg tagatacacc tgaatggaaa gcatcatacc
    46141 aggaaggaaa tcaggataat ggctcttcta tcccggtagt gaaaatgggt gatgatgcgc
    46201 ccccacctgg gtataccggt gaatggcgtg atggtggccc ggttatctcc gtaacagagg
    46261 gggcggaaca accagcatta tcaccctatg aagaggcaag gcagcggtat gcaacacaag
    46321 atcgtgctgc catgctgcga gagtatgcca gtgcggattt gaccaataac agtgaattga
    46381 aacgggcggc aagtgaacga ctcgatgaac tggatcagca tgaaaaaatt gctcaaaagg
    46441 tagaggcatt caagcaacag tccgatgatg aactgttgac gacataccgc aaattgaatg
    46501 aaaaccctaa gcgctctgag gaagaacaat tgcagcatga ggctgtacgc accgtgcttt
    46561 cagagcgtct cggtattgat gccaaaggga agcagcagcc tgcgccccag cccctccatc
    46621 agcagtctgc acctgaagtg gagtcgctgc aatcagccac accagataat caatcaccaa
    46681 atggcattcc ccctgggcgt atggacgcat tccgtgatac gccggcgtat ctgcgccaag
    46741 actcacgcat tcaggggttc gctgacgata gcgatgtcca gcgcgcgctg gcagagcaac
    46801 aatacgcgcc aacggctgaa gaactcatta gccaacaaat ggggcagggc gatcagggat
    46861 atacgccaga ggagctggcc attattgagc aggctgaaaa aatccgggca gcacgcacac
    46921 ctcgactgcc agcccccggg caaacatctg ttatcgccat gcccggggag cttcacccga
    46981 tgatgagcga tgaacgggct gcgggcagcg ggccgcagtt cgatgccggg cggcaggtgc
    47041 gcggacagtc ttttattccc gccgaacgcc cacaggcggg caatgaggtg gggcgagcca
    47101 gccaaaccta tgacagcgag acggtgccga cacatgctat tgaggataaa ggcattattt
    47161 tttctggttc accgacaatt gatgaggggc agacagcgca gccgccacaa tttacatctg
    47221 gggaaacacg cactcagcgc aagacgcgag agtttaccga ggcaatgggg ggcaataatc
    47281 aagccgcgtt gcccgaccag cgccaccgtg ttgcaggtgt gcctgtcgat gcgacaacgg
    47341 aagcctatgc gcgcggtgaa cctgtcggtg aattgaagtt ctacacgaaa aatcgcccct
    47401 tcacgagtga gcctctggcc cgtcactcaa agtgggggaa aatgccaggt gccacggtcg
    47461 aagaggttga gggggggtat gcggtacggc ttcctgctcc agaatatgga caacaaggaa
    47521 aggctgccgg tttcggtgag gaaccgcgtg gcaccacaca gaatagcggt aaaccggcaa
    47581 agattgaggt gtttcgtcgt caggccgatg ggcaggtgtt cttaggatat aaagacagta
    47641 cacgggtatt accgttaaaa gccgggttta aagacagcgc agaggcgcgg gcctatctga
    47701 aagataaccg tgccgagttg gatgaaaagc tggagaagct acgcaagacc ctcaacgaca
    47761 acgcctccaa aaatgggggc gttgctgttt ctggggtgga tattggcggg ggcaacatta
    47821 ttcacgatgg cagtttcagt agagacggac acaaaccaga aacgggaatg ctgcgcgacc
    47881 gggtgcaact ggcctccgat ctgttcgtct ctcacctgaa cggcgcagct aaaatcaaag
    47941 tgaaggccgt gcaaacgcag gccgaagcgg cagctatgat gccaaatggt atcccggcgg
    48001 aatttggcac tgtgcacgct atctatcagc cagaactcag ccgggtgatc gtcatcgccg
    48061 acaatattgc aggcccgcgt gagctgcgcg ccaagctgag ccatgaaatc atcgcccatc
    48121 atgggctggc gtcggtgatt ggtgatgtgg aatatgaccg catcatgcgg gtgctgcacc
    48181 agacgcgtga gagcaagaac aaaacgattc aagaggtatg gcaccaggtg gaacgttcct
    48241 acggcaacga atcgctggag gagcaggcca atgaatttct ggcgcatatg gcagagcgca
    48301 gcgagctcac cgggcttggg ggcatgtggg atcgctttat ctcactcctg accaccgggc
    48361 ttcgaaaagc aggcgtaatc agccatgccg acatcacgcc ggcggaaatc cgcaatatcc
    48421 tgcgcaccat cactggccgc tttaagaaaa cggcgatgta tgccaatgag aagcccggta
    48481 cgcgcgagtt tgaggatacg ttttcacgca ctgatgcgct gtattcgaaa gcagacgaca
    48541 ccgatccgct tcgaccactg ccggaagagg cagaacagta ccgaactgaa ctgggtaatg
    48601 ccatgcggtc gatgcggtct ggggacatgt ccatcaggat aggcagaact cccccagtgt
    48661 tacgtgcttt gggcgcgccg aatctggaca tgtatatcaa tcgcgatacg gtgcgcaaag
    48721 ccactaatgg ggtgaaacat gacgtccctt tatcggtgat cgaacatctc cccgaactca
    48781 tgcacgatcc cattactata tatcgttcag ccacacagga taatgctgtc gttgcgttgc
    48841 tcgaagcaaa tgatatgaac ggaaaccctg ttgtctcagc ggttcatatg agcgcagcac
    48901 aacggcgtat agaggtaaac cggatcgcgt cggtttatgg cacagaagaa ggcaagaaga
    48961 tcaaaacaat ggagagggaa ggtttggtct tgtatcgtcg caaaaaagaa aaccctgata
    49021 accctcattc acaggggctc caattgccca aggaggagcg ttcttatcaa ggttcagatc
    49081 aaaatatact ctcatccgcc gatatccgca agaacaaggc cctgtactca cgcaccggca
    49141 acccggcaat ggatgcagaa accagccgca aaatgggctt taacgttgat aaaggttggt
    49201 ttgataaagc caaggacttc taccagatgg ctgccgacag cgatcggacg gaactgaaac
    49261 agtggtggcg cgaaaccttc cgcaaactga acacccgcac ctttgatggc ctggcaccgc
    49321 tgaaatacgc tgaagacgcg gcgggggatt ttgacgccag tgtgtcgggc tacaccgccg
    49381 ctcgcatggc agccggtgcc ggtgcggttt cgggcgtggt gtgggagcac ggtttagtgc
    49441 ggtacaacaa aaaagagggc gttaccgagc gtatcccggg aacgggcaaa gccgattcat
    49501 tgatggggat attcgacgca ttgggcaacc agcgtgaaaa cttcctgaag tggatagccg
    49561 ggcaccgctc tgaacggctg atggcggaag gacgcgaaaa caacttcacg gcagacgaaa
    49621 ttgcgtacat gaaaaccctg aatcggggta acgaagcgtt gtttgccgat cagaaacgca
    49681 aatatgatgc ctttatcaag tcgattctgg atctgcaaca ggacatgggg ctgattgatc
    49741 ctgaaagccg ggtgatgtgg gaggatgcct ggtatctgcc gtatttccga gaagccgaga
    49801 acggcgaggc acacggcccc tggacgacac gcggcgtggc caaccaaagc agcacggtgc
    49861 gcaagttgaa aggcagcgag ttaactatca aagacccgat tgaaaacctg tttaactatg
    49921 tggcgaaatc ggtcgatgcc tcgatgaaaa acgaggcgat gcgccggtca gtggtgaatc
    49981 tggcggatac cggcgtcgtt gaggtgatcg agaaaccgaa caaaatagat tacgaacgca
    50041 tcgggaaaaa tgtggtgaaa gtgtacgtcg atgggcagga gcaactggtg caggtcaatg
    50101 atccagacct ctatcgcgcg ttcaccatga ttgatatgga gcgcagcaat tccgtgttca
    50161 tgaaagcggc gcgccaggct aaacgggtgt tgaccatcgg cacgacggcg atgccggact
    50221 tcattttgcg caactttatg cgtgactccc tgcattcctg ggccatcaat aaagatggtt
    50281 ttcgtgccgg gatatcctcg ttgcaggggc tacgcaaagc gctggccacg gatgacacac
    50341 tggtggacat gatggccgct ggcgctacgt ttggcggtgg ttatcttaac gcttacgatc
    50401 cgacagggtc ggcagccaac atccgcaaag tgctgcgccg caaaggatac agcgacagcc
    50461 agatgcgtga attcgaatcg acgctggtac gcagcggcaa ggatgtactg gataagctgg
    50521 aaaccgcatg ggagaaatac cggcatatca gtgaaggggc ggaaaatgct aaccgcgtgg
    50581 ccacctatga tgctgcatta aaatccggca aaagtaaggc acaggcggcg tttgaagcgc
    50641 gcgacttgat ggacttcagc atgatgggct cgagcaaact gattatcggt ctgaccgatg
    50701 tggtgccgtt tctcaatgcc cgcctgcagg ggatgagcaa actgggtagg gcgataaagg
    50761 acgatccacg agaggtattg aagcgagggg ggtatatcgc tggtttgtct ttagctcttc
    50821 tggcgctgaa ctgggacgat aagcgctata aagaactgcc tgactgggat aaagatgcct
    50881 attggcattt ctttttaggt gatcaacacg ttcgtttccc taagcccttt gaaatcggcc
    50941 tgatgtttgg cacaacgtcg gagcgtttcg tgcgtatgct gggcggtgaa gattcccccg
    51001 gtaagttcgg caaagtcatc gcgagaaatt ttcttgaaac gatggcattc aatcccatcc
    51061 cacaggtggt gaagccgatg gcagaagcct atgtgaatta tgacttcttc cgtggcggcc
    51121 ctatcgagag catggcagac agtaacctga ttgctgccgc gcgctacaat gaccaaacca
    51181 gcttactgat gcgtgaaatc ggcgcggcga ccgggctgtc tcccaagatg ctggatcata
    51241 ttgttcaggg gtataccggc acgctggggg cgtatgtgtt gggggcaacc aatattgttg
    51301 cgcggcagtt cagtgatgcc ggcgaaacgc cagcactgcg gctggatgaa ttgccggtta
    51361 tcaaatcgtt tctgcgcggc tctgaccctg ccaaatcaac gcaattcgcc gatgatttct
    51421 accgcatgat gaaccaggcc aatcagatta gccgcacgat taatgcctat cgggaacaag
    51481 ggcgtaagga tgatgccagc accctgaaga cagaaagtgc cgggctgtta tcaaaacgga
    51541 aaatgatgac agaaacacag aaagcggttc gccaactgaa tgatcgtatc gagatggtgc
    51601 gtattgatcg cacgctatcg gcagacgaga agcgagagcg cattaaccgc atgatggccc
    51661 agcgaaacac actctatcag caggcagtag aaagagtgaa tccgtatttt gaccgataaa
    51721 ggtgggggat tggcgtggca gtttttatca tcagggatgc ggcgggtaat attgtactgg
    51781 atctgtcaaa tagcattaca aaaacattgg gatattttac ggttgaaccg ggaatatctc
    51841 agtccatcac catcccggat ctttatggtg gacgactgtg ggtgtctgtc tcggcagagc
    51901 aaataaaatt cgatattggc gtttggagca cacctccctc ggcggtaatt aacgggaata
    51961 ccatcacagt ggcaacgacc agggatgttc gttgcttctg tgtttacggg atttattaat
    52021 aatggcattt gttcgggttg taaacgacag cggtataacg ctgatcgatt ctgaggtgtt
    52081 taatttatat ttatctcaga aagggcaact aactatgaat tgggatgtga atattggtga
    52141 ttgcatggtt ataacctata atgcaaaatc caatctcccg ccactgctag ctatatcctg
    52201 ttctagtcat cacgcgtcac tgctttcggt taagaaaaat ggaaatgtat atacctatac
    52261 tattatttat gttgattcat catctgttaa ttcagcggtg attggtgact attatatctt
    52321 tgatgtcggg atattaacga ggtctggtac aggtgggtta ataatcagaa ataaggatgg
    52381 ttatgttacg tttgacagtg ataatcaata cttgcgagta cattcagtgg agagttatgc
    52441 accatcaggt tgggatgagt tatctgggcc agtgggtgca gattctgtca gagggttgcc
    52501 aatggggagg cggtttgcgg cagtcacgaa caaagtaggg tatgtttaca cagaaagaat
    52561 taatggcggt gaagttatgt caacatggta ctatgacggg gtgagaatag cgagtatagg
    52621 aggaaatatg tcacgacata tggaactcta tcagcagtca ctgtatgaaa gtggcggagc
    52681 taatcaaacg cgaaatagct ccgactcaca gtatatgatt gtggatgtta cgggatactg
    52741 ataaaccatt tattactgcg gaaatctgtt ctcacagtct gataaatttt tgaatttgct
    52801 tccttcaacc catgtatatt taaatgcatc accaaccaga tattctggct gtttaaagcc
    52861 tgctcttttt tcatatattg gctggtcgta tatatgcctg cctatttcta ttttccccca
    52921 gcatgtgggg ggctttggcg gggtgcatgc tgaggttagt aaaatgacag gaatcaagtg
    52981 aaatagttta ttcatattag ttaccttgtg aattattata tcactaatga aagtcagtgt
    53041 gagttgctgc cgagagttta tcttattgtg ctcctgatgc acattgccag cgtcagaagt
    53101 gcaataaaac caataatccc caaaacgata cttccatcgc tattcaaatc cattcggcat
    53161 ttcttcgcta tcatcagcgc agcagcaccg aacggaatgg caagagcggg gtgaatggtc
    53221 atcataatgg cagtcagaat gaggcaaaaa ataaagatag tggatgacat atttcctctt
    53281 ggtttagggg caagtttaga ggcaaaaaaa gagaaaaggg caaaaaaagg gcaataaatg
    53341 tgtagtaaaa ggtatctcat ggtggaactt ataataaagc aacatcatga aatataaata
    53401 aaaattaaaa ctatcagtta tttatatttc aagatgatac ttgttgagat tgtactgctg
    53461 tttaggtgta acag
//
