# Supplementary material for: May the Phage be With You? Prophage-Like Elements in the Genomes of Soft Rot Pectobacteriaceae: Pectobacterium spp. and Dickeya spp
Source: Front Microbiol. 2019 Feb 14;10:138. doi: 10.3389/fmicb.2019.00138 (PMC6385640; doi:10.3389/fmicb.2019.00138)
Supplement: Supplementary file 2 [file Data_Sheet_2.ZIP › Supplementary_prophagesGENBANK_files/Genbank FILES _SRP_prophages/phiD2.gb]

LOCUS       Exported               34794 bp ds-DNA     linear   UNK 02-AUG-2018
DEFINITION  phiD2.
ACCESSION   .
VERSION     .
KEYWORDS    .
SOURCE      phiD2
  ORGANISM  phiD2
REFERENCE   1  (bases 1 to 34794)
  AUTHORS   .
  TITLE     Direct Submission
  JOURNAL   Exported Aug 2, 2018 from SnapGene Viewer 4.2.3
            http://www.snapgene.com
FEATURES             Location/Qualifiers
     source          1..34794
                     /organism="prophege phiD2"
                     /mol_type="genomic DNA"
                     /note="/genome_id=6666666.356846"
                     /note="/genome_md5="
                     /note="/project=robertczajkowski_6666666"
                     /db_xref="taxon:6666666"
     CDS             complement(170..1153)
                     /codon_start=1
                     /product="Phage integrase"
                     /label=Phage integrase
                     /db_xref="SEED:fig|6666666.356846.peg.1"
                     /translation="MAVKKLDDGRYEVDIRPIGRNGKRIRRRFEKKTEAVAFERYTLSR
                     ADKKEWQHGYGVEHRQLSELVELWWLYYGQNLKNGLIEKRHLKRTAAQMDDPEICRINK
                     RSILEFRTRRLYDGISSSTVNRDIYRLSGMFSALIKLEIYTGENPLKELPPLPEKQPTV
                     TFLTESEIARLLDTMEDDQYRLAVLCLSTGARWGEASTLRAEQVMHNRVTFTETKNGKN
                     RTIPISEEVTRIIKTRETGKLFKVDYSAFCEQIKAVKPDIPKGQASHILRHTFASHFVM
                     NGGNLVALQQILGHASIQQTMTYAHLAPDYLQNAITLNPLRGKIAV"
     CDS             complement(1220..1513)
                     /codon_start=1
                     /product="C protein"
                     /label=C protein
                     /db_xref="SEED:fig|6666666.356846.peg.2"
                     /translation="MDIAQKIKLIRKAEGLTQIKFCEISGIALSTLKNYEGGHREPGLQ
                     VVLQITNTKQFQKYTLWLMTDKTAPEAGQIAPALAHIGPDETKSHQSNQNIG"
     CDS             complement(1774..2001)
                     /codon_start=1
                     /product="hypothetical protein"
                     /label=hypothetical protein
                     /db_xref="SEED:fig|6666666.356846.peg.3"
                     /translation="MTKKRTVIPTYKVRCNTFDNLIEIEFSVPDDQIVAIRLNANQSRE
                     LIAQLNHHLDESMICSFVYPTKKNVLALRV"
     CDS             complement(2135..2599)
                     /codon_start=1
                     /product="hypothetical protein"
                     /label=hypothetical protein
                     /db_xref="SEED:fig|6666666.356846.peg.4"
                     /translation="MNEQQIHNIRFELAYSYQLEKITEVFNRRIDKLLCLIQFFLGSAV
                     VTEHGSGLLLGILIAIISALLFTLKPGEITGGAKQQAQKYRILLDDLDTSDIEIIKQKK
                     YVIEQTDSPHPYSLCGPAYHRAAVMLGLPANSKLTPMEKLFSFFCGGIPR"
     CDS             2854..3126
                     /codon_start=1
                     /product="Cox"
                     /label=Cox
                     /db_xref="SEED:fig|6666666.356846.peg.5"
                     /translation="MSERVYEVRYPVDAVPYQKFAELIGKSEAAVKGMVDNGKLPLIPW
                     VNPENPNPRRGENWVYIPEFNRAMRDAFMNRPKEQRDAWLLWLGL"
     CDS             3137..3343
                     /codon_start=1
                     /product="hypothetical protein"
                     /label=hypothetical protein
                     /db_xref="SEED:fig|6666666.356846.peg.6"
                     /translation="MVKKEFAVIRLSKHTSIYRGFSVVEYPRTITNSIKRYRVSREGQS
                     YGLFDALALATGYIDSLHNSVYQ"
     CDS             3457..3612
                     /codon_start=1
                     /product="hypothetical protein"
                     /label=hypothetical protein
                     /db_xref="SEED:fig|6666666.356846.peg.7"
                     /translation="MQKPISIAPFLWQQQTESRIKPEIRHGEGKQGIIIRPDGRRWNPP
                     KGAFNR"
     CDS             3625..3954
                     /codon_start=1
                     /product="hypothetical protein"
                     /label=hypothetical protein
                     /db_xref="SEED:fig|6666666.356846.peg.8"
                     /translation="MSQSVDHQKWIQRCRDIVFKGESRAQSFWERAALETREIILFSAK
                     PKLKSRHVNYSWHQFTAEERAAIWGAIKRIRSICDETALFGPDDFLKTSNQNGTPNKPS
                     QSPIH"
     CDS             4026..4256
                     /codon_start=1
                     /product="hypothetical protein"
                     /label=hypothetical protein
                     /db_xref="SEED:fig|6666666.356846.peg.9"
                     /translation="MKNAEVKTMTVAADGALVELLKKARLEERKDQHFSFSLRLAALAV
                     RAQQRDLSAAEVVELIRQESERFEHSAQGLS"
     CDS             4256..4480
                     /codon_start=1
                     /product="Phage protein"
                     /label=Phage protein
                     /db_xref="SEED:fig|6666666.356846.peg.10"
                     /translation="MDSMDIAQERETFIRETQIQKARQQSGYAVSASVCESCDAPPPEA
                     RRVAVPGVRLCVYCQGDAELKNKHYRGAL"
     CDS             4477..5313
                     /codon_start=1
                     /product="Methyl-directed repair DNA adenine methylase (EC 
                     2.1.1.72)"
                     /EC_number="2.1.1.72"
                     /label=Methyl-directed repair DNA adenine methylase
                     /db_xref="SEED:fig|6666666.356846.peg.11"
                     /db_xref="GO:0009007"
                     /translation="MSTIATPLKWVGSKARVMHILREHLPAGDRLVEPFAGSCAVMMNT
                     DYPEYLIADINPDLINLYQVIKEDVKDFIDTAEGLFRTANTAESYYRFRQVFNRSKENR
                     TTSAALFLYLNRHGYRGVCRYNRAGGFNVPYGHYASPYFPLAEIQAFAEKARRAKFICA
                     AFGETLQLIHPGDVVYCDPPYIPQTPTASFTSYHTDGFTHNDQYDLCSALSRLAERGIP
                     VIASNSDTHHAHSLYHRFDICRFTAPRSVGVAAGESKQAGEIIAKRLPVHGQRGAA"
     CDS             5313..6227
                     /codon_start=1
                     /product="Modification methylase ScrFIA (EC 2.1.1.37)"
                     /EC_number="2.1.1.37"
                     /label=Modification methylase ScrFIA
                     /db_xref="SEED:fig|6666666.356846.peg.12"
                     /translation="MRAIDLFAGFGGSSTGARMAGAHVVWAANHWPAAVEYHRLNHPDA
                     IHVCQDLHQADWSSVPAHDLMMASPCCQGHSRARGKTAGDPQHDASRSTAWAVVSAAEY
                     HKPSAVIVENVPEFLNWALYPAWAAAMAALGYALSPHVVDCADLGVPQNRVRLFLICTR
                     SRSPLSLDLPRLSHVPATTFIDFDDGRWSQINRPGRAISTLARIENGRRQFGERFIFSY
                     YGNTKSGRSIDRPIGTITTRDRWAVVDGDRMRMVTKREVLAAMSFSSSYITPDSHRLTV
                     NMAGNAVPPVAMCRVVEAIGGCL"
     CDS             6224..6511
                     /codon_start=1
                     /product="Phage protein"
                     /label=Phage protein
                     /db_xref="SEED:fig|6666666.356846.peg.13"
                     /translation="MSILQLAVMGEYFAAMKAGMKPFEYRLDNAYWRRRLIGRDYEQLV
                     ITWGYPARSDMSRRLILPWLGYEMQTITHPHFGDKPVNVFAIRIGAGVCE"
     CDS             6508..8562
                     /codon_start=1
                     /product="Putative replication protein"
                     /label=Putative replication protein
                     /db_xref="SEED:fig|6666666.356846.peg.14"
                     /translation="MIDLHVPEHNGAYHAVREWQREQFSPGEPAGLSFVERSLWHLNKV
                     DHYWRQQYLAGMPDYLAKYFGQRYEKLFKSDEHTGRRRANTFLLRTLGKSVLPRLRTVT
                     ERYQTQQRAAGDLPFPFCDDLEKMPVYDRDNIRALSQQVADFMAASLRDYTENRIRNTG
                     NLTDRYITLLSFRHLGLLTLQAGTQPPYWAQFTKGRRPLSTEKAESGLLRMMSPEWWRA
                     RLKRRRDIQREHMAIAVGQVQKAASPYVSRSTLDEWKEQKRRNREFFKAFDLEDEEGNR
                     VSLDDMVNASNANPAIRRCELMVRMRGFEDLAQEMGCAGEFYTITAPSRYHAVHSGGGF
                     VEQWSGASPRDTQKYLCGVWARIRAELSREEISVFGFRVVEPHHDGTPHWHLLLFMRPE
                     HIEQVRDIMAYHARREDSGELNSEKAQKARFHYEPIDPEKGSATGYIAKYISKNIDGYA
                     LDGEADEETGENLRDMAKAVSAWASRWRIRQFQQIGGAPVTVYRELRRLGDKQLDNAAM
                     DAVLAAADVGDWAAYTQAQGGPLVSRDELVVRLSYEVTERANQYAEDVQKVQGVYSPLL
                     GERSAIITRTVEWKIVPKQAAASAGAGVSGGPAAAWSSVNNCTSGLRRRLSELLRLRGF
                     PPDPGLVDVLIRGCNLAISEGRALKMVNGRLEEVGQTGDCELWPGWNWE"
     CDS             8996..9994
                     /codon_start=1
                     /product="Predicted Zn peptidase"
                     /label=Predicted Zn peptidase
                     /db_xref="SEED:fig|6666666.356846.peg.15"
                     /translation="MNDTNHMRSIYNKFQSAGFNLSYIRSLLPEWWDERLADTPSGRQY
                     ASLHLARMFSILPESLKDESEGICFNFGGNHKFKHRNNVADDDLDIATAIAYTAAKIVA
                     SNFKKPYDPQIVLDPELIRKDTMESNPWVSLGNLVEYCHSVGIPVIYLKKFPRGAKKMA
                     GLALMSCGRPVIILTQPQKYGYMLFDLAHELGHIAKGHLNAENGQCHVDEKIESASTSD
                     IEKEANEFAFQVLSGQKSLRIVPTGRFLKAPQLANAAKKFGSERGVDPTHIALNYGFVM
                     GHWGVAVNAVKAICNGHPTDQNFIKDMMKKGIDLESINEDDLNILENLIGE"
     CDS             9998..10639
                     /codon_start=1
                     /product="hypothetical protein"
                     /label=hypothetical protein
                     /db_xref="SEED:fig|6666666.356846.peg.16"
                     /translation="MIVLSDNDVILKLAQCNLLSQLSTILNEQPDQIFINPAARYQLLP
                     DNPDKAIRKCGSQQIYEQLGAFIESVNDVPEIMNLSLLELLGDVPNIDVGEQFLLASCI
                     ENPDAIFMTGDRRCLSAIISNKATLATIHQRLIDAVVTFESSLLLCVHGSTVAHVHSQL
                     MGNPKPDVVLRMALANSGSAMCECLFSYTRDFYEYLAFKDRLPDREWGLQ"
     CDS             complement(11128..12180)
                     /codon_start=1
                     /product="Presumed portal vertex protein"
                     /label=Presumed portal vertex protein
                     /db_xref="SEED:fig|6666666.356846.peg.17"
                     /translation="MKRKDKTGTHRAVTASQPDMAAALKSDPGLSAFTFDGPYPVRDGH
                     DLLDNMYCADNGRYYDTPVDWYGLARAFGSASWHQSALYFKRNALTGCFIPHPLLSRQA
                     FSAFVLDWFVFGNGYLERRVNRLGGVLSLRHVPAKYTRRGSDLNTYWFIRQWKDEHTFD
                     TDSVCHVINPDIHQEIYGMPEYMGALLSASLSHSADMFRKLYYDNGSHAGCIIYIGASQ
                     VDTESMDNVKKTLKEARGKGAFKNLLLHAPGGGEKGVQIIPFSQISAKDEFLNIKSVTR
                     DDILAAHRVPPQLMGAMPEGNGSFGDVEKAARVFAINELMPVMEALKHVNDWLGMEVIR
                     FNPYALLKAE"
     CDS             complement(12180..13907)
                     /codon_start=1
                     /product="Terminase, ATPase subunit"
                     /label=Terminase, ATPase subunit
                     /db_xref="SEED:fig|6666666.356846.peg.18"
                     /translation="MIQDAFVRQRAKQLYWQGYPPAEISRLMGINQNTVYAWKKRDEWD
                     ETPPIQRVTHSIDARLCQLAQKPTKTGGDLKEMDALTRQLKTLNDGQPGNAAGGKKPRQ
                     RKVKNHFTDEQIAALREKILDSLSWHQRGWYEQRHHRNRMILKSRQIGATWYFAREALL
                     DALRDDVKYPYQRNQIFLSASRRQAHQFRGFIQKVAEEVDVELKGGDKIVLSNGAELHF
                     LGTSAATAQSYTGNLKFDEFFWVSNFTNLRKVAGAMATLKGLTRTYFSTPSSETHEAYP
                     FWTGARWNEKRSKAQKVAFDVSWKALNSGLLCPDKTWRQIVTLQDVIDHGWEYTDLEEI
                     QDENSGDDFLNLYMCEFVRDGESAFNLNALIACGADGYDEWPDWKPFASRPMADRGVWI
                     GYDANGSSGNGDSGAISVVVPPLVAGGKFRTIETQQIRGLEFEEQAKVIEALTFKYNVQ
                     HIAIDGTGIGEAVYQIVKKFFPAAVCFLMSVSSKRALVLKMLQVIRAGRWEYDRSERAL
                     INAFNAVRRVKTPGGIMTYDTDRARGSNHGDLAWATMLAVINEPLGQEQGGGGFAMEF"
     CDS             14030..14905
                     /codon_start=1
                     /product="Phage capsid scaffolding protein # Fam Scf032"
                     /label=Phage capsid scaffolding protein # Fam Scf032
                     /db_xref="SEED:fig|6666666.356846.peg.19"
                     /translation="MASQTPQDRTTGMSGTAKPTRKKFRVAVSGSTVDGREIGRDHLYA
                     MAESYNPQVYGARVNVEHILSPYPGSDFSAMGDVVALSAEDITDGPLKGRAALYAEIEP
                     TERMKQLTGEGKKIYSSIEIDPQFAATGRPYLRGLAMTDTPASLGTERLKFAAQQRAQV
                     QAFNNLPGEPVMFTEAMEAELVELSEQRSDEGKQWFSRVMGIIGKGRKSDGEQFSQVRE
                     AVENVAQSHADLLDNFNALKNQQQQDSRTIQTLTSELAALTQKLATQDNSYSQRPPASG
                     GNSGAQLADF"
     CDS             14931..15986
                     /codon_start=1
                     /product="Phage major capsid protein #Fam0066"
                     /label=Phage major capsid protein #Fam0066
                     /db_xref="SEED:fig|6666666.356846.peg.20"
                     /translation="MENSTRNLYNQYISRQAQLNGVQPNDVAMTFSVEPAAQQRMEQAA
                     QESDEFLKQINVFGVKAQEGQKILIGSKGPIASTNNSSDGTSRRNPTDNHSKESNTYHC
                     RKVNYDSAISYPQLDAWATQPNFQALISQANAQQIGLDRIMIGFNGTTYAETSNRSANP
                     LLQDCGVGWLQKTRNDAAHRIIKNVTLTARDEDNKIIAKGTYGNLDTAVFDAKNSLLDP
                     WHRKAPDLVVIMASDLLTSSNFPRLNALSQSNPNTELLAGQLIVSQERVGGLPTFLAPY
                     FPSNAVLITSFKNLSVYYQLGALRRSIAEEPQYNRIATYQSSNDDFVVEDYGKVALIDG
                     IQFAQAAGDGQ"
     CDS             16030..16911
                     /codon_start=1
                     /product="Phage terminase, endonuclease subunit"
                     /label=Phage terminase, endonuclease subunit
                     /db_xref="SEED:fig|6666666.356846.peg.21"
                     /translation="MLTPAQRHFQRVMAERRGQADTETAVSRTAHEQILHRLRLHQAAL
                     KQVQSDATKAEMKKAMLPEYDGWIDGTLEGDSGRQDEVIVTLMVWAIDCQDNALTLRLG
                     RYVVKHGLSLPADKFRRDAVTVLAEEVSNPVLTLATTDADADLSGYTAVLDEVAAIVDG
                     KDMPDEVRAKLCKARAFSRRAAVDAQTKAEALKLFREAMARNPNAGVKREIATLTRELK
                     KLMPGSSNEPEDGAPGDDETTTETPAGETPPAASADAAQPAVKKAAVRNTTARKTTRTT
                     GKSKAARQSAKR"
     CDS             17010..17501
                     /codon_start=1
                     /product="Phage head completion-stabilization protein"
                     /label=Phage head completion-stabilization protein
                     /db_xref="SEED:fig|6666666.356846.peg.22"
                     /translation="MSLVASKRVSDGGDVPEIDDGAAAVSAGEFWPVIVLRDLRLAARI
                     TGGITTTRLMHVTTEAVVHVTDQLASWQQTQQAAGYAALADVPAGQVNGESIKVYRFKR
                     AVYAIARALLLEGYRDVDTTAKGDKATDTFDSQRDDLWRDARWSIADIRGAQRLFAELC
                     "
     CDS             17501..17701
                     /codon_start=1
                     /product="Phage protein"
                     /label=Phage protein
                     /db_xref="SEED:fig|6666666.356846.peg.23"
                     /translation="MVVRALQGDTVDLLCYRHYGTSAGVTEQVIAANPGLSRQMFLTAG
                     QAITLPDIPRQTEQETVQLWD"
     CDS             17692..17994
                     /codon_start=1
                     /product="hypothetical protein"
                     /label=hypothetical protein
                     /db_xref="SEED:fig|6666666.356846.peg.24"
                     /translation="MGLNDLQRLNDGVTYGLSVMVTGIGVMTVSEKVALAGLVIGVVTA
                     WRAWLFRRRIERAQRRRNELIEQILQQSERRTLNASERRAVAILHQGDVDDENRD"
     CDS             17978..18523
                     /codon_start=1
                     /product="Phage lysin (EC 3.2.1.17) # Phage lysozyme or 
                     muramidase (EC 3.2.1.17)"
                     /EC_number="3.2.1.17"
                     /label=Phage lysin
                     /db_xref="SEED:fig|6666666.356846.peg.25"
                     /translation="MKTAIKRCSIALIVALGVTLSPGTLRTSPEAQQKTASWEDCRQSP
                     YYCPAGVLTVGIGSTGNVQNRAYSNDEIARRWVNDMQRAENCVNGNFNGAAMPQSAFDA
                     MTDTAFNLGCSGLMWFTNRQGSKQRTTIWKHAQAHEWPAMCERLTDFVNSGGQRSTGLV
                     NRRSDFKAWCLRDLAGVP"
     CDS             18520..18957
                     /codon_start=1
                     /product="hypothetical protein"
                     /label=hypothetical protein
                     /db_xref="SEED:fig|6666666.356846.peg.26"
                     /translation="MKLTVTLAVLLVLAVSGVLWQTYQRGIDRAHTEALTDSARQQREL
                     LTEVRALADDARNVLAQVREREQQRYAEGEERRENLREVMQSDTCANTVVPAAVSDSLQ
                     KRAAVAQRADTARPGAAQPDGADTDARTENAGDLGRGRALE"
     CDS             18926..19060
                     /codon_start=1
                     /product="hypothetical protein"
                     /label=hypothetical protein
                     /db_xref="SEED:fig|6666666.356846.peg.27"
                     /translation="MTWGAVALWSDQLLDALDTCNADKAAINDLYLRRLQRLKDAATP"
     CDS             19071..19529
                     /codon_start=1
                     /product="Phage tail protein # FIG072132 and FIG003673"
                     /label=Phage tail protein # FIG072132 and FIG003673
                     /db_xref="SEED:fig|6666666.356846.peg.28"
                     /translation="MLKTNSLRTALTASNTWCRANPEAFTVFVEEGGIETTGETPSFLY
                     RYSLVLFVMNFTGDIDDFTLPLMAWLWQNQPDLLLNPQKNREVKFTTLINNDDSADILF
                     EIPVRERVKVTRDDNGILRAEHLPEPRPRLTGGVWDAVLDDATGEAAA"
     CDS             19526..20164
                     /codon_start=1
                     /product="Phage tail completion protein"
                     /label=Phage tail completion protein
                     /db_xref="SEED:fig|6666666.356846.peg.29"
                     /translation="MTDKLFHALDKVFDDILSGLSPAGRLKTARQVGQALRRSQQQRIR
                     AQKNPDGSAYATRRRKVLRSQKGMVFVWEGQVRHLKNWHGGRGKYGRTITGFDEDRNAI
                     RTFYRSDIERYIEINTQAVRRTTSKTTPMFQRLRGYRFLKMRADTDGASVGFDGIAGRI
                     ARVHQYGERDKVGSGAFARYPVRELLGISLADERLIQDAVINSLGSAAT"
     CDS             20161..20742
                     /codon_start=1
                     /product="Phage baseplate assembly protein V"
                     /label=Phage baseplate assembly protein V
                     /db_xref="SEED:fig|6666666.356846.peg.30"
                     /translation="MSAELMRLLENLLRVGVVTAVDPATWRVRVKSGELLTDWLRWNTT
                     RAGAFNVWFPPAVGEQVLLGCLGGNPETAVIIGSLFSEAHPAPGNSLKEIVITAPDGAR
                     FRYDAVAGSLEATGMKTVNVVASVSVTLNTPVVECTQHLKARTVEITHGGTLAGNVAHS
                     GGAMTSNGVQVDNHRHGGIQPGGSWTSGTQ"
     CDS             20739..21107
                     /codon_start=1
                     /product="Phage baseplate assembly protein"
                     /label=Phage baseplate assembly protein
                     /db_xref="SEED:fig|6666666.356846.peg.31"
                     /translation="MTATYTGMNPYGTGTLTDADQLWQSVRDILTTPLASRVMRRDYGS
                     LIPDLLDAPQNAVTRLQLMSAAVIALTRWEPRISLNAVDIRYSASGAVDVALSGLITET
                     MQAANAAITLRGDSDGNG"
     CDS             21094..21990
                     /codon_start=1
                     /product="Phage baseplate assembly protein J"
                     /label=Phage baseplate assembly protein J
                     /db_xref="SEED:fig|6666666.356846.peg.32"
                     /translation="MATVDLSQLPQPQIIEVLDFEVILQDVKAVMIAAFPAAQQASVTA
                     ALALESEPLTAIAQVIAYREMMLRQRINEGAEACLLSYAVSSDLDNLAANLNTKRLTIT
                     EATDTADAVMESDSALRLRAQAAFEGLSVAGPTGAYEYFAKSASGKAADAKAISPSPAV
                     VVVSVLSTEGDGSASADLLAAVDAALSADDKRPVGDRLTVQSAEIVRYAITAVLYRYPG
                     PESEPIQQAAQQALTSWLSAQGRIGRDVARSAIMAALHVQGVQRVELLEPAQDIVISDT
                     QAAYCTGFTITEGGSDE"
     CDS             21983..22591
                     /codon_start=1
                     /product="Tail protein I"
                     /label=Tail protein I
                     /db_xref="SEED:fig|6666666.356846.peg.33"
                     /translation="MSNSLLPPSASDFMRNVASSTQLLSGIAVDLDTLWDAERCPVGLL
                     PYLAWALSVDRWDKRWSEQTKRQVIKAAWLVHRQKGTIAALRRVVEPFGYLIRITEWWQ
                     TGGTPGTFRLDIGVQDAGITEETYLELERLIADAKPVSRHLLGLNIVMDCAGNIPLAAG
                     QYSGDALTVYPYFPETITTGGADIHAAAIHLSDNVSVNA"
     CDS             22588..23982
                     /codon_start=1
                     /product="Tail fiber protein"
                     /label=Tail fiber protein
                     /db_xref="SEED:fig|6666666.356846.peg.34"
                     /translation="MTTKYFALLTNTGAALLANATALGRQLSITQMALGDGGGTLPTPD
                     SAQTKLVNERRRAPLNSLGVDPANPSQIIAEQVIPEDEGGWWIREIGLYDAAGNLIAVA
                     NCPETYKPQLQEGSGRVQTVRMILIVSSTEAVTLKIDPSVVLATRAYTDGKATEAKTYT
                     DVQTNNAKIEVKAYADNLLDQLATTMTATLTEKMDKTQNGADIADVAKFLENIGLTAPR
                     FSGVVGTTRNAKMSITTASATATFTADEIIVAESLGGRQYRLSLFNASVNLAMTGAGGM
                     DTGAAPAAGFVALYAIYNPTSKAPALLAVNTTSAVSPEIYTGGNMPAGYSASALVSVWR
                     VSSSRFVVGYQSGRHINIMRSAALSSTTQHADLIPLSLAGLVPPNAHSVNGDGYTTTSD
                     GSTVAVNFAIASSATGINRYSATQFGSLSMPFSSVAIIDAQTVYYTATIVSGALTMAIN
                     VSGYEI"
     CDS             23979..24134
                     /codon_start=1
                     /product="hypothetical protein"
                     /label=hypothetical protein
                     /db_xref="SEED:fig|6666666.356846.peg.35"
                     /translation="MIYVQFSDSSQTDVVAVFSCPQDEAAYQHQGQVPDNDARYLTFIS
                     KLEQVE"
     CDS             complement(24160..24669)
                     /codon_start=1
                     /product="Phage-related tail protein"
                     /label=Phage-related tail protein
                     /db_xref="SEED:fig|6666666.356846.peg.36"
                     /translation="MMMVYGLFVFELRTLPYQQLQQSRAWRHVKNERINRSAKWQYIGA
                     GEDQITLSGVLYPEITGGEVSLTALTTQAYSGRPWPLIDGTGQIYGMYVLTGMQTTRTE
                     LNRYGKAKKIEFSLSFQRCDEDLREKLQSSSFSDLMDTARSAATNAMKSVKDAATGAID
                     TVKGLF"
     CDS             complement(24682..27657)
                     /codon_start=1
                     /product="Phage protein"
                     /label=Phage protein
                     /db_xref="SEED:fig|6666666.356846.peg.37"
                     /translation="MKSLDIRVAFSAIDRLTRPVNTARQSAGGLSESLKRTQAAIKDLD
                     QQSKSFNRLRDSVQKTSRKIDEASRSLDGLKKAQQSGTVLTDKQREHMASLAAKLERLN
                     ITRDQEVVKLRAASQAVRGHGVSLVGSNATIQSAIRRTEQYNQTLERERRQLAAVTQAR
                     ARYERMQQTAGKLRGSGTMAVAGGAAVGYAGGQFLAPAVGFDEEMSRVQALTRLDKGDQ
                     QLAALRAQAKKLGAETAFTTRDAASGQAFLAMAGFTPQAIQAALPGVLNMALAGGMELG
                     ETADIGSNILSQFNLDASQMDRVSDVLTGAFTRTNTDLFSLGETMKYAGPVAAKLGISL
                     EDAAAMAGMLANNGIRGSDAGTAMRASLSRLASPPKAAAAALKELGVSVADAKGKMRPM
                     QDVLRDLYKATQKYGQVDQVSFFKDIAGEEAFVGLQTLVQAAGSGALGKLSGELKKAKG
                     EADAVAKKMADNLGGDLKNLDSAWEGFRIQVEETTDKPLRSLTQGLSDVITNVSGWVKE
                     NPKLTQTLLLAGGGALALTVAIGGTSLAIGLLMGPLAKLQLGFSLLLGSRGVGGALSLF
                     SGLSSLLGGPMARMGGWLQLFSGSAGRLTTTLTPLRGMLLAVFTSPAAALGSLVRGVGG
                     LLLRLSGLPALWSLITGAVSMLGGVLSLLLSPIGLIGAAFVAAGLLIWRFWEPIKTFFS
                     GMFTGIVISLGPIRQTFTGLAPVFDVIVSAVSRLWDRFKQLFDPIQTTKKTLDDCAIAG
                     YGFGKVLGSALEMLLWPLQKLMEGIGWVLEKLGLIPSGLDAAQKKADQLKGELTPEGKN
                     RLQGLVTSLTGDLKGATTAPPPAPKPPLTGDSGTQRRLQKIADNTGGVLEETKKRIGPG
                     DIVFKNLPKALAVRGEWQESRLTGGTPSAPSQPAQTMQALSDRPAVVAATLPVKQADAS
                     PVSRPAARTPAASGFNGEIHIHLHGVERQDARELGRIVADAVSAELARRDRLQRGSFRD
                     RE"
     CDS             complement(27644..27802)
                     /codon_start=1
                     /product="hypothetical protein"
                     /label=hypothetical protein
                     /db_xref="SEED:fig|6666666.356846.peg.38"
                     /translation="MQFDQIDDLVADIAVVFNWPPSELFSMDLGDVIAWRARAAIRSGA
                     SEADEKP"
     CDS             complement(27808..28125)
                     /codon_start=1
                     /product="probable tail protein"
                     /label=probable tail protein
                     /db_xref="SEED:fig|6666666.356846.peg.39"
                     /translation="MNTPNDNTVTLATPIARGDSTISQVAITDDIKQAGSLRGLRLVNV
                     LNMDVDSITTLLTRVTSPKLKLAEINAMDTRDFMRLAEAITPFLVHAEPGEPNAEATEE
                     A"
     CDS             complement(28173..28688)
                     /codon_start=1
                     /product="Major tail tube protein"
                     /label=Major tail tube protein
                     /db_xref="SEED:fig|6666666.356846.peg.40"
                     /translation="MAVPHKLRLFTCFVNGNNQIGKVTSVTLPKLTRKTEDFQGAGMIG
                     SVAVDLGMDSGALEAQMVVGGMEKKLLLEYGGDIDDVRLRFAGEYYTDGDSQLVEVEMR
                     GRITEIDGGESKQGEDTSVTYALKNTYYKLSIDDQSVLEIDLLNFIYKKNGKNIYPDRI
                     TSALGLGN"
     CDS             complement(28689..29867)
                     /codon_start=1
                     /product="Major tail sheath protein"
                     /label=Major tail sheath protein
                     /db_xref="SEED:fig|6666666.356846.peg.41"
                     /translation="MSETRFHGVRVRENTDLVTAINDIDSSVIGVVAVADDANADTFPL
                     NTPVLITRVNSVLGKAGKTGSLYKTLKAIADQTSPKVIVVRVAAAVEGGEKTQSQLIIG
                     GTAADGSYTGMYALLTAEAKVNYRPRILAVPDYDTAEVTSALCVIAQNLRAFVYAGCHG
                     CTTMAEAITYRAQFAYRELMVIWPDFIAYNPLSGSNETFPAPAYACGLRAAIDNAQGWH
                     KSLSNVAVNNVLGISRDVFWSLQAEDSDANELNNKEITTLIKRNGFRFWGNRTTDTHDY
                     LFEVYTRTAQILADSIAEAQFEAVDEPLTPANVKDVVNGINGKLSALVTAGRLIGGECW
                     FDIQDNPTTGLRQGQVRVRYKYTPVPPLEDLTLYQTFTDDYFDSAFSSLGGV"
     CDS             29997..31160
                     /codon_start=1
                     /product="Gene D protein"
                     /label=Gene D protein
                     /db_xref="SEED:fig|6666666.356846.peg.42"
                     /translation="MRRKQGETMAITELTDTLINAAKRYDDALTEAVKSPAFSITLGGK
                     SLKELSDRLISLSLTDNRGFEADQLTLSIDDSDGRVELPPRGAQIALSIGWQGEALTYK
                     GLYTVDEISHEGPPDVLGVTARSADFREEFNVKREVSWHDVTVERVVSAIAHRYGMKAQ
                     ISDMLMNIEIDHADQTEESDMSFLTRMAEQLGAIATIKNGTLLFILPGGGVTASGKALP
                     SASLTRSSGDGHRFRIADRDAYTGVRAYWLDLKFGKKKKVSVKRRRTKPKPKKEKSSSR
                     EGDYITGAEGNVFVLRKTYQNEEVAKRAAAAKWRQLQRGAAEFSITLARGRAELYPEMH
                     LTVSGFKPDIDNQDWIIARAEHVIDGNGFTTRLELEAKIPDWIAESE"
     CDS             31197..31445
                     /codon_start=1
                     /product="Levansucrase regulator"
                     /label=Levansucrase regulator
                     /db_xref="SEED:fig|6666666.356846.peg.43"
                     /translation="MFRCPFCGAMARTRTSRRLSDITIRQYHQCQNLECSETFTTLNTV
                     ERRVSKRTREDPLPPDFIPQDAFPASHYGRDQLNLAL"
     CDS             complement(31690..31863)
                     /codon_start=1
                     /product="hypothetical protein"
                     /label=hypothetical protein
                     /db_xref="SEED:fig|6666666.356846.peg.44"
                     /translation="MKSVLIVKSTTKNLSSNWDKSKKHFVGLQPRTITKVHPKQQYQST
                     KNLQKCGLFSKK"
     CDS             32045..32389
                     /codon_start=1
                     /product="Phage protein"
                     /label=Phage protein
                     /db_xref="SEED:fig|6666666.356846.peg.45"
                     /translation="MAEITWDGRMAVYYNKSDSHSRIRFTLAHELGHHILGHTKYQAKF
                     RDYPGTLNNTGNSLDEREANRFAAELLMPEEAIDTMINNEGIHSIDALASTFDVSRDAM
                     YWRLKNLNYV"
     CDS             32458..33252
                     /codon_start=1
                     /product="hypothetical protein"
                     /label=hypothetical protein
                     /db_xref="SEED:fig|6666666.356846.peg.46"
                     /translation="MSNNNSHTNGSSATRQNTSAHQSVIENDQSLSSRSENLQSRTQEQ
                     SQAVQPNSFNINPGVVAPDSSGGATNPKLPLNDYDGPISDQHLKHSSDNHKDRRKMRWG
                     LFSVGLLASIGFLVTGAIMSYLIISNMLSTNEFIREGVNTIITNTSPEKTKEIILQLAP
                     NPPESLVHAHDAAKEVLIQTRTQQQDLLGKFLESTNWTSISPMITLVAFILGVGLTLAI
                     ALLRALFREDQAEKTNPLSDVASPLSKLIENFIDLIMSKFRK"
     CDS             complement(33477..33965)
                     /codon_start=1
                     /product="Transcriptional regulator"
                     /label=Transcriptional regulator
                     /db_xref="SEED:fig|6666666.356846.peg.47"
                     /translation="MKMNFPFLFLGLMAIIPSQASSLTTDNNEKKLEVGFGKPTYRQTL
                     HYRKLYEKKPFPDAEIFYYDNGIYKIISQGEEHYGVYVMQGNFQDQTYTIRYISLPSED
                     WGKKTAFHQLTFINGDKEKYFIQNAIVETGEAIAQQNGTFSLEENKISNPITQKWHKN"
     CDS             complement(33978..34100)
                     /codon_start=1
                     /product="hypothetical protein"
                     /label=hypothetical protein
                     /db_xref="SEED:fig|6666666.356846.peg.48"
                     /translation="MMISNIIGMTEISLPQKITGLKIATKPAIIIIFQTQHEER"
     CDS             complement(34151..34288)
                     /codon_start=1
                     /product="hypothetical protein"
                     /label=hypothetical protein
                     /db_xref="SEED:fig|6666666.356846.peg.49"
                     /translation="MQGYGTDTATPVDTRFSKRFQPVVAVEDIMLTGQQKRAQRGLEQR
                     "
ORIGIN
        1 acaccatccc tgtctttcgc cctccttgat ggagggcttt tttttgcgga atttctggaa
       61 aatcctttaa aaacaactgc atgttaagca atcacaagca actgcaagcg gttaaaaagt
      121 ggtcaaaaac gggccaattt ccgcaagtgt ggacactatg tggacgatcc taaaccgcta
      181 ttttcccccg taatgggttg agtgttatag cgttttgcag atagtccggt gcaagatgcg
      241 cgtaagtcat ggtttgctga atgctggcat gacctaaaat ctgctgtaat gccaccagat
      301 ttcccccgtt catcacaaaa tgactggcaa atgtgtgccg cagtatgtgt gatgcctggc
      361 ctttcggaat atcgggcttt accgctttga tttgctcgca aaatgccgag tagtccactt
      421 taaacagctt tccggtttcg cgggttttga tgatccgcgt aacctcttcc gatatcggaa
      481 tggttctgtt tttaccgttc ttggtttcgg taaacgtcac ccggttatgc atcacctgtt
      541 cagcccgtaa tgtgctggct tctccccacc ttgcgccggt gctcaggcac agcacagcca
      601 accggtactg atcgtcttcc attgtatcca gcaggcgcgc aatctccgat tccgtcagga
      661 aggtgactgt tggctgcttt tctggcaatg gtggcaattc ctttaaggga ttctcgccag
      721 tgtagatctc cagctttatc agtgccgaaa acattccgga aagccgatag atgtctcggt
      781 tgaccgttga agagctgata ccgtcgtata atcgccgggt acggaactcc agaattgagc
      841 gcttgtttat ccggcatatc tccgggtcgt ccatctgggc cgctgtccgt ttcagatgac
      901 gcttttctat caaaccattc ttcaaattct ggccgtagta aagccaccac aattcaacca
      961 gttcactgag ctggcgatgt tcaacgccat aaccgtgctg ccactctttt ttgtccgctc
     1021 tggacagcgt gtagcgttcg aaggctaccg cttctgtctt tttttcaaac cgccgccgga
     1081 tgcgttttcc gttacgtccg atcgggcgaa tgtccacttc atagcgacca tcatcgagtt
     1141 tcttaactgc cataagaaca ctctccgatg tagtcatcat cctgatacgc aatatcaaag
     1201 atgtaactta tgtaaatatt tacccaatat tctggtttga ttggtgagat tttgtttcgt
     1261 ctggcccaat gtgtgcgagg gccggtgcga tctgaccagc ttccggtgct gttttatccg
     1321 tcatcaacca cagtgtgtat ttttggaact gctttgtatt tgttatttgt aacaccactt
     1381 gcagtccagg ttccctatgg ccgccttcgt agttttttag agtgcttaac gctataccac
     1441 tgatttcaca aaattttatt tgtgtaagtc cctcagcctt tcttatcaat ttgatttttt
     1501 gagctatatc cattgacatg gttcccatgt gaagactata ttccactcaa aaggtattca
     1561 gttgaaaacc ttttgaggcg cgaaaaacca accgcgaaca taagcaactg aaagcagatg
     1621 taagcggttg gtgatcgaaa gagagtatca cggtgagggg gagaggatga aggaagacga
     1681 tgtgcgggaa gctgaagtta cagcggaatc acccgtaatt aatacgtatg ccgtaactct
     1741 tgagataaag gcgagggtta gcgaaggcgc tactcagacc cgcagcgcca gtacgttctt
     1801 ttttgttgga tacacgaaag aacaaatcat tgattcatct aaatgatgat ttagttgagc
     1861 aatcagctcg cgcgattgat tggcatttag ccgaatcgca acaatctggt catcaggaac
     1921 agaaaattca atctcaataa gattatcaaa ggtattgcag cgcactttat aggtgggaat
     1981 gacggtacgt ttctttgtca cgttattttc cttgtgtggt tggttgattg ttggcacttg
     2041 aaatctacca caaaaaccac gcgccgggcg tggtgaaata tcccggcatg aatttaatta
     2101 aaatagataa atggctaata gtttctgcgg gtggttaacg agggatgccg ccgcaaaaga
     2161 aagaaaatag cttttccata ggcgtcaatt tgctattagc cggaaggcca agcataacag
     2221 ctgcccgatg ataggcgggg ccacatagtg aataggggtg tgggctatcg gtttgttcta
     2281 ttacatactt tttctgctta atgatttcaa tatcactggt gtcgagatca tcaaggagaa
     2341 ttcgatattt ttgtgcctgc tgtttcgcac ctccggttat ttctccgggc ttgagtgtaa
     2401 aaagtagcgc cgaaatgatt gcaattaaga tgccgagcaa caaaccggaa ccgtgttcag
     2461 ttacaacagc gctaccgagg aaaaactgaa taaggcagag cagcttatcg atacgtcgat
     2521 taaaaacctc tgtaattttt tcaagctggt aactataggc aagttcgaaa cgaatattgt
     2581 gaatttgttg ctcgttcata tggactcctg gctattggta tccgcccttc tttgtaggct
     2641 tcggggcggg acggggtgga acgtgaaaat tgtcggtgtc ctgttctgcg gaagatgcag
     2701 tgctaagcat gatgactcgt cctctgtagt tggtgttatg cccgttctgg ctggaacgtg
     2761 tgggcgtagc gaggatacca cagcgcacgc gccgggcgtg gctaaaaatc ccggtacata
     2821 ttcaataacg caaaatgaaa agcgagggtt gtgatgagtg aacgcgttta tgaggttcgc
     2881 tatccggttg atgctgttcc gtatcagaaa tttgcggaat tgatcggtaa gtcggaagcg
     2941 gcagtgaaag gcatggttga taatggaaaa ttgccgctta ttccgtgggt gaatcctgaa
     3001 aaccctaatc ctcgtcgcgg tgaaaattgg gtttatatcc cggaatttaa ccgtgctatg
     3061 cgcgatgcct ttatgaacag gccgaaagaa cagcgtgacg catggttatt atggctgggg
     3121 ttataggtga ataattatgg ttaaaaagga atttgctgtt attcgcctga gtaagcacac
     3181 cagtatatat cgtggctttt cagttgttga atatccaaga acaatcacaa actcaattaa
     3241 gcgatatcgc gttagcaggg aagggcagtc ttacggttta tttgatgcgc tggcattagc
     3301 taccggttat atcgacagct tacataacag cgtatatcaa tagtgcagcg ataaagaata
     3361 aaaacaacac cagagaaacc acggccgggc gtggctaaat atcccggcac ctatttgcaa
     3421 ccgtctatct gtgggcggtt accaatagga ggatcaatgc aaaaaccaat ctcaattgcg
     3481 cctttcctct ggcagcaaca gacagaaagc cgtatcaaac cagaaatacg ccacggagag
     3541 ggcaagcaag gcatcattat tcggccggat ggccgccgtt ggaacccgcc gaaaggggcg
     3601 tttaatcggt aatcaggagg gagcatgtct caatctgtcg atcatcagaa atggatacag
     3661 cgttgcaggg atatcgtgtt taaaggtgaa tcccgcgctc agtcattttg ggagcgtgct
     3721 gcactggaaa cgcgtgagat tatccttttt tccgcaaagc caaagctgaa gtcgcgccat
     3781 gtcaattact catggcatca gtttacggcg gaagagcgcg ccgctatttg gggggcaatt
     3841 aagcgcatcc ggtctatttg cgatgaaact gcgctatttg gcccggatga ttttctgaaa
     3901 accagtaatc aaaacggcac acccaataag ccgagccagt cacctattca ttaattaacc
     3961 cataacaacg aataaatgcc ctttatcggg cagggattcg tattacctga aaaaaggaaa
     4021 ccgtaatgaa aaatgccgaa gtaaaaacta tgaccgtcgc cgctgatggc gcactggtcg
     4081 agctgctgaa aaaggcccga ttggaggaac gcaaagacca gcatttttcc ttctcactgc
     4141 gccttgctgc gcttgctgtc cgcgctcaac aacgcgacct ctctgccgcc gaagtggtgg
     4201 aacttatacg ccaggaatca gaacgttttg agcactccgc tcaggggctg agctgatgga
     4261 ctcaatggac atagctcaag agcgcgaaac gttcatccgc gaaacgcaaa tccagaaggc
     4321 ccggcaacag tcgggctatg ccgtttctgc atccgtctgt gaaagctgtg acgcaccgcc
     4381 ccccgaagcc cgccgcgtgg ccgttccggg tgtgcgtctg tgcgtgtact gccagggtga
     4441 tgctgaactg aaaaacaaac actatcgggg ggctttatga gcactatcgc cacaccgctg
     4501 aaatgggtcg gcagcaaggc ccgcgtgatg catatcctgc gcgagcattt accggccggc
     4561 gaccgtctgg tggaaccgtt cgccgggtct tgtgcggtca tgatgaatac cgattacccg
     4621 gaatacctga tcgccgatat caatcccgac ctgattaacc tgtatcaggt catcaaagag
     4681 gatgtgaagg attttattga taccgccgaa ggtctgtttc gcactgcgaa tacagcagaa
     4741 agctattacc gcttccggca ggtatttaat cgtagcaaag agaatcgcac cacctcagca
     4801 gcactgtttc tttatctgaa ccggcacggt taccggggcg tttgtcgcta taaccgcgcc
     4861 ggtgggttta acgttcctta cgggcattat gcatcgcctt attttccact ggccgagatt
     4921 caggcatttg ccgaaaaagc ccgccgtgca aaattcatct gcgccgcgtt tggcgaaacg
     4981 ctgcaactga ttcaccccgg cgatgtggtg tactgcgatc cgccatacat cccgcaaacg
     5041 ccaacggcca gcttcaccag ttatcacacc gatggtttca cccacaacga tcagtatgac
     5101 ctgtgcagcg cgttatcacg cctggccgag cgcgggatcc ctgtcatcgc atcaaacagc
     5161 gacactcacc acgcgcacag cctttaccac cggtttgata tctgccgctt caccgcaccg
     5221 cgtagcgtcg gcgttgcggc tggggaaagc aaacaagctg gggaaattat tgctaagcgt
     5281 ctgccggtgc atgggcagcg aggtgccgca taatgagggc tatcgatctc ttcgctggat
     5341 tcggcggctc atcaaccggc gcgcgtatgg caggagcgca tgtggtatgg gctgctaatc
     5401 actggcccgc tgccgttgaa tatcatcgtt taaaccatcc cgatgcaatc cacgtttgtc
     5461 aggacttgca tcaggctgac tggagttctg tcccggcaca tgacctgatg atggcttccc
     5521 cttgctgcca ggggcatagc cgggcacgcg gaaaaacagc gggtgatccg cagcatgatg
     5581 cgagtcgctc gacagcgtgg gctgttgtgt ccgcagccga atatcacaag ccctcagcag
     5641 tgattgttga gaatgtgcct gaatttctaa attgggcgtt gtatccagca tgggcggcgg
     5701 caatggcggc gttgggttat gcgttatcgc cacatgttgt tgattgtgcc gatctgggtg
     5761 ttcctcagaa tcgcgtccga ttgtttctga tctgcactcg cagtcgctcc ccactttcgc
     5821 tcgacctgcc tcgcctcagt cacgtccctg ccaccacatt cattgatttt gatgacggaa
     5881 gatggtcaca gataaaccgt ccgggtcgtg caatatcgac gctagcacgc atcgaaaacg
     5941 gtcgccgtca gttcggtgaa cgattcattt tcagctacta cggaaataca aaatcgggcc
     6001 gctcaattga caggccgata ggcacaatta caacccgcga tagatgggca gtggtggatg
     6061 gtgatcgtat gcggatggtg acaaagcgcg aggtattggc cgcaatgtct ttttcgtcat
     6121 cgtatatcac gccagacagc caccgcctga cagtcaatat ggcgggtaat gctgtacccc
     6181 ccgttgctat gtgccgggtt gttgaggcca tagggggttg tctgtgagca ttctgcaact
     6241 cgcggtgatg ggggaatatt tcgccgcaat gaaggctggg atgaagccat ttgaataccg
     6301 gttggacaat gcctactggc ggcgtcggct cattggtcgg gattatgagc aactggtgat
     6361 tacatggggc tatccggctc gttctgatat gtcacgccgc ctgatcctgc cctggcttgg
     6421 ctatgaaatg cagacgatca cacatccgca ttttggcgat aaaccggtaa acgtgtttgc
     6481 tatacggatc ggtgctgggg tttgtgagtg attgatttac atgtccctga acataacggc
     6541 gcgtatcacg ctgtcaggga atggcagcgt gagcagtttt cccccggcga gcctgccggg
     6601 ctgagtttcg ttgagcgcag cctgtggcac ctgaataagg ttgatcatta ttggcgtcag
     6661 cagtacctgg ccggaatgcc ggattatctg gcgaagtatt tcggccagcg ttatgaaaag
     6721 ctgtttaaat ctgatgagca caccggccgc cgccgggcca atacgttttt actccgtacc
     6781 ctggggaaaa gcgtattgcc acgcctgcgc accgttaccg aacgatacca gacgcaacag
     6841 cgtgcggcgg gagatctgcc gttcccgttc tgcgatgatc tggaaaagat gccggtttat
     6901 gaccgtgaca acatccgcgc cttatcgcaa caggttgccg actttatggc cgcatcgtta
     6961 cgtgactaca ccgaaaaccg catcagaaac actggaaatc tgacggacag gtatattacc
     7021 ctgctgtcgt ttcgccacct tggcttgctg accttgcagg ccggaacaca accgccttac
     7081 tgggcgcaat tcaccaaagg ccgccgcccg ttatccaccg agaaagccga atccggcctg
     7141 ttacgcatga tgtcaccgga gtggtggcgg gcgcgactaa aacgccgccg cgatatccag
     7201 cgggagcata tggctatcgc ggtcggccag gtgcaaaagg cggcgtcacc ctatgtttcc
     7261 cgctccacgc tggatgaatg gaaagagcag aaacggcgta accgggagtt tttcaaggcg
     7321 tttgatctgg aagatgaaga gggtaaccgt gtttctctgg atgacatggt taatgccagc
     7381 aacgccaacc cggcaatccg ccgttgtgag ctgatggtga gaatgcgcgg ctttgaggat
     7441 ttggcgcagg aaatgggctg cgccggagag ttttacacca tcaccgcgcc gtcacggtat
     7501 cacgctgtac acagtggcgg cgggttcgtt gagcagtgga gcggtgccag cccacgcgac
     7561 acacagaaat acctgtgcgg tgtgtgggcg cgtatccggg cggagctgtc acgcgaagag
     7621 attagcgtgt tcggcttccg tgtcgtcgaa ccgcatcacg acggtacgcc gcactggcat
     7681 ttgttgttat tcatgcgccc ggagcacatt gaacaggtgc gtgacatcat ggcgtatcac
     7741 gcccgccggg aagactccgg cgagctgaac agtgaaaagg cgcaaaaagc ccgcttccac
     7801 tatgaaccga ttgacccgga aaaaggcagt gctacgggtt atatcgccaa gtacatcagc
     7861 aagaatatcg acggttacgc actggatggc gaggccgacg aggaaaccgg ggaaaacctg
     7921 cgcgacatgg caaaggcggt atctgcctgg gcgtcgcgct ggcgtatccg gcaatttcag
     7981 caaatcggtg gcgcgccggt gacggtttac cgcgagttgc gtcgcctggg tgataagcaa
     8041 ctggataacg cggcgatgga tgcggtactg gcggcggcag atgtaggcga ctgggcggca
     8101 tacacacagg cgcagggcgg gccgttagtc tcgcgtgatg agttggtggt gcgcctgtct
     8161 tatgaagtga ccgagcgtgc caatcagtac gccgaagacg tgcaaaaggt tcagggggtg
     8221 tactcgccat tattagggga gcgctccgcg atcatcactc gaacggtgga atggaagatt
     8281 gtcccgaaac aggccgccgc gtcagcgggg gccggggttt ctggcggccc cgccgccgct
     8341 tggagttctg tcaataactg tacgtcgggc ctacggcggc gattatcgga actgttgcgc
     8401 ttacgcggtt ttccgcctga tccggggctg gtcgatgtgc tgattcgtgg ctgcaatctg
     8461 gcaataagcg agggcagggc gctgaaaatg gttaacggta ggctggagga agtaggccag
     8521 acaggggatt gcgagctgtg gccggggtgg aattgggagt aataatttat tgaatgctgg
     8581 tgatatattt gaatagtatg attatttatt aaaaatatta atattatttt ttagtaaaag
     8641 ttagctgact aaataaaatg tttatttgat tattactggt taggcaatcg actgattttg
     8701 cgaggacgta tgtaagtaac tgaaaatatt aatatatttt tatctcagta ctatgactgg
     8761 taagcaagga gcatggagtg ttgggggtga gatagaagta cagggtactc ttgtggttac
     8821 taagtgaatg agatctgatg gttctttgtt tttccctttg attgtatacg taccttagaa
     8881 caaaaaaaga tgcgttttcg atcttttttc cctatagtac gcacgatttt tatgccataa
     8941 atataggtaa gacattatgg cattttgttc acacacatgt agtctggagg ctctcatgaa
     9001 cgatactaat catatgagaa gcatatataa taaattccaa agcgctggtt tcaacctgtc
     9061 gtacatcagg agcttattgc ctgaatggtg ggatgagcga ttggctgata ccccttcggg
     9121 gcgtcagtac gcaagcctgc acttggctcg aatgtttagt attttacctg aaagccttaa
     9181 ggatgagagc gaagggattt gttttaattt tggtggaaat cataaattta agcatcggaa
     9241 taatgttgct gatgatgatt tagatatagc gactgcaatt gcttatactg ctgcaaaaat
     9301 tgttgcatcg aattttaaaa aaccatatga cccgcagata gttctagatc cagaactaat
     9361 cagaaaagat acgatggaaa gtaatccatg ggtttcactt gggaatttgg ttgaatattg
     9421 tcactcagtg ggaattcctg ttatatatct taagaaattc cctcgtggtg ctaagaaaat
     9481 ggctggttta gctttaatga gttgcggaag accagtaatt atattaaccc aacctcaaaa
     9541 gtatgggtat atgctttttg atttggcgca tgagttgggg catattgcga aagggcattt
     9601 aaatgctgaa aatggacaat gtcatgtgga tgagaagatt gagtcagcct caactagtga
     9661 tattgaaaaa gaagctaatg agtttgcgtt tcaagtcctt tctggacaaa aatctcttcg
     9721 cattgtacct acaggacgct ttttaaaagc gcctcaactg gcaaatgcgg caaaaaaatt
     9781 tggcagcgaa agaggtgttg accctaccca tattgccttg aattacggtt ttgttatggg
     9841 acactggggg gtggcagtaa atgccgtgaa ggctatttgt aacggacacc ccaccgatca
     9901 gaacttcatc aaggatatga tgaaaaaggg aatagattta gaaagcatca atgaagatga
     9961 tctaaatatt ctggaaaatc ttatcgggga atgatacgtg attgttcttt ctgacaatga
    10021 tgtcatattg aagttagctc aatgtaatct actatcacaa ttatctacga tattaaatga
    10081 gcaacctgat caaattttca ttaacccagc agctaggtac cagctgcttc ctgataatcc
    10141 agataaagca attcgaaagt gtggaagtca gcaaatatat gaacagctgg gggctttcat
    10201 tgaatcggta aatgatgttc ctgaaattat gaatctttcc cttttggaat tattgggtga
    10261 tgtgcctaat atagacgtgg gtgagcaatt tttgcttgct tcctgtattg agaatccaga
    10321 tgcgatattt atgacgggtg atcgtagatg cctatctgca attatttcga ataaagccac
    10381 tctggctact attcatcagc gtctaattga tgccgtcgtt acatttgaat catcactact
    10441 attatgtgtt catggctcaa cggttgctca tgttcatagt cagctgatgg gtaatccgaa
    10501 accggatgtt gtacttagga tggcccttgc taattctggt agtgccatgt gtgaatgttt
    10561 attttcttac actcgtgatt tttatgaata ccttgctttt aaagataggt taccagatag
    10621 ggagtggggt ctgcagtaaa taatagcaaa cttataataa gtcacttggt ggttataata
    10681 aatcaataca tatctctaaa atagctgctt tatatctata cgttttgtat gcacaaaccc
    10741 gcacaatttt gcacaatttt tttgatgcta tttttcccct ttccgcccgg tacgcacgcg
    10801 tgctgggccg gtttctgcac ttgcacaaaa aatgaagcga gagtcgcgcg caggtgacgg
    10861 gggaacagcc cccgcgatgg ggggtaggta gggttcccct ttgctgtgcc gaatccggcc
    10921 catttcccgc cctgctgcgt gcgtatttcc ctccgggaga tgcggcgcgt catccggtga
    10981 gagagcccga cagcgcggcg ctgaggcggt tttatgtgtg tgggaaatgg tggtgttagc
    11041 cgttgatctg aaaagagatt gttcgcagat ggcgtgaaag tttttgaatg aaaaccgccg
    11101 cgtgagtgcg gcggcggcgg tgggatatca ctcggctttc aacagggcgt aagggttgaa
    11161 gcggatcacc tccatcccca gccaatcatt cacatgctta agcgcttcca tcaccggcat
    11221 cagttcgttg atggcgaaca cccgcgcggc tttctccaca tcgccaaagg agccgttacc
    11281 ctccggcatg gcgcccatca gttgcggcgg cacgcggtgc gccgcgagga tatcgtcacg
    11341 cgtcaccgat ttgatattca ggaattcatc tttggccgat atctggctga agggaataat
    11401 ctgtacccct ttttcaccgc cgcccggcgc gtgtaacagc aggtttttaa acgcgccttt
    11461 accgcgcgct tccttcagcg ttttcttcac gttatccatg ctttcggtat ccacctggga
    11521 tgcgccgatg tagataatgc acccggcgtg cgaaccgttg tcatagtaga gcttgcggaa
    11581 catatcggca gagtgcgaca ggctggccga cagcagcgcg cccatgtact cgggcatacc
    11641 gtagatctcc tggtgaatat ccgggttgat gacgtggcac acgctgtcgg tatcaaacgt
    11701 gtgttcatct ttccactgcc ggataaacca ataggtattc agatcgctgc cgcgccgggt
    11761 gtacttggcc ggaacgtggc gcagggacaa cacgccgccc agccggttga cccggcgttc
    11821 aaggtaaccg ttgccgaaaa caaaccagtc gagcacgaag gcggagaacg cctgacgcga
    11881 caatagcggg tgcgggataa agcacccggt cagcgcattg cgtttgaagt acagcgcgga
    11941 ctggtgccat gacgcactac caaacgcgcg agccagcccg taccaatcca ccggggtgtc
    12001 gtaataacgg ccattgtcgg cgcaatacat gttatccagc aggtcatggc catccctgac
    12061 cggatagggg ccgtcaaagg taaacgcgct cagccccgga tcgcttttca gggccgccgc
    12121 catatccggc tgactggcgg taaccgcccg gtgtgtgccg gttttatctt ttcttttcat
    12181 cagaactcca tcgcaaagcc accgccgccc tgctcctggc cgagtggttc attgatgacg
    12241 gccagcatgg ttgcccaggc cagatcgcca tgattagagc cgcgtgcgcg gtcggtgtcg
    12301 taagtcatga tgccgcccgg cgtcttgacg cgccgcacgg cgttgaacgc attgattagc
    12361 gcccgttcgc tgcggtcgta ttcccagcgg ccggcacgaa tgacctgaag cattttcagc
    12421 actagggcgc gtttggatga caccgacatc aggaagcaca ccgccgccgg gaagaatttc
    12481 ttcacaatct ggtagaccgc ttcgccaatg ccggtgccat caatggcgat atgctgcacg
    12541 ttgtatttga aggtcagcgc ttcgatcact ttcgcctgtt cttcgaactc cagaccgcgt
    12601 atttgctggg tttcgatggt gcggaacttg ccgcctgcca ccagtggcgg caccaccacc
    12661 gagatcgccc cgctgtcgcc gttgccgctg ctgccgttgg cgtcataacc aatccagacg
    12721 ccgcgatcgg ccattgggcg tgacgcgaag ggcttccagt ccggccattc gtcgtaaccg
    12781 tcggcaccgc aggcgataag tgcattcaga ttgaacgccg actcaccatc acggacgaac
    12841 tcacacatat acaggttgag aaaatcatcc ccgctgtttt catcctgaat ttcttccagg
    12901 tcggtgtatt cccagccgtg atcgatgaca tcctgtagcg tcacaatctg acgccaggtt
    12961 ttgtccgggc acagcaggcc gctattgagt gctttccatg acacatcaaa cgcgaccttt
    13021 tgcgccttgc tgcgtttctc attccagcgt gcgcccgtcc agaatgggta cgcttcatgg
    13081 gtttcactcg atggggtgga aaagtaagtg cgcgtcagcc ccttcagcgt cgccatagcg
    13141 cccgccactt tgcgcaaatt ggtgaagttg ctgacccaaa aaaactcgtc aaacttcaga
    13201 ttcccggtat aggactgtgc cgttgccgca gacgtgccga ggaaatgcag ctcagccccg
    13261 ttgctcagga cgattttgtc accgcctttc agctcaacgt ccacctcctc cgctaccttc
    13321 tggataaagc cccggaactg gtgcgcctgc cgacgtgatg ccgacagaaa aatctggttg
    13381 cgctgatagg ggtatttcac atcgtcgcgc agtgcatcaa gcagcgcttc acgcgcaaaa
    13441 taccaggtgg caccaatctg gcgtgacttc aggatcatgc ggtttcggtg gtgacgttgc
    13501 tcataccagc cacgttgatg ccacgaaagg gaatccagta ttttttcccg tagcgcggcg
    13561 atctgttcgt cagtgaagtg atttttaacc ttgcgctggc ggggtttctt gccgcctgcg
    13621 gcattgcccg gctggccgtc attcagcgtt ttcaactgcc gggtcagcgc gtccatttcc
    13681 ttcaggtcgc caccggtttt agtcggcttc tgggccaact ggcacaaccg cgcatcaata
    13741 gaatgcgtca cgcgctggat aggcggcgtt tcgtcccatt cgtcgcgctt tttccaggca
    13801 tacaccgtgt tttgattaat ccccatcagg cgcgaaattt ccgctggcgg gtaaccctgc
    13861 cagtaaagct gttttgctcg ctgccgtaca aatgcgtcct gaatcatgcg cggtttcccc
    13921 ctttgccggg aagattaccc cgcgcgcgat ccgcctttcg ctcactttcg gctctggccc
    13981 tccgccgaca acaaaaccgc gttgagacag ggagttaggc tctgcaatca tggcgtcaca
    14041 gacaccacag gacaggacta caggcatgag cggtacagcc aaaccgaccc gcaaaaaatt
    14101 ccgggttgcc gtctccggtt ccaccgttga cgggcgcgaa atcggacgcg accacctcta
    14161 tgcaatggcg gaaagctaca acccgcaggt atacggcgcc cgcgttaacg ttgagcacat
    14221 tctttcgccc tatccgggca gtgatttcag tgcgatgggc gatgttgtcg cgctgagcgc
    14281 ggaagacatt accgacggcc cgctaaaagg ccgcgccgcg ttgtatgcgg aaatcgaacc
    14341 caccgagcgg atgaagcagc tcaccgggga agggaagaag atttattcca gtatcgaaat
    14401 cgatccgcag tttgccgcga ccggcaggcc gtatctgcgt ggtctggcga tgacggatac
    14461 cccggccagc ctgggcaccg agcgcctgaa gttcgccgcg cagcaacggg cgcaggtgca
    14521 ggcattcaac aatctgcccg gtgagccggt catgtttacc gaagcgatgg aggcggagct
    14581 ggtcgaactg tccgaacagc gcagcgacga gggtaagcag tggttttccc gcgtgatggg
    14641 gattatcggc aaaggccgca agtcagacgg tgaacaattt tcccaggtac gcgaagcggt
    14701 ggagaacgtc gcccagtccc atgctgacct gctggacaat ttcaacgcgc tgaaaaacca
    14761 acagcagcag gacagccgca ccatccagac gctgaccagc gagctggccg cgctcacgca
    14821 gaagctggcg acgcaggata acagctacag ccagcgtccg ccggccagtg gcggcaacag
    14881 cggcgcgcaa ctggctgact tttaagtacc gttaagcgag acaagcgaac atggaaaact
    14941 ctacccgtaa tctttataac caatacattt cccgtcaggc gcagcttaac ggggtgcagc
    15001 cgaatgacgt ggcgatgacc ttcagcgtcg aaccggctgc ccagcagcgc atggagcaag
    15061 ccgcgcagga aagcgatgaa ttcctgaaac aaattaacgt gtttggcgtg aaagcccagg
    15121 aaggccagaa gatcctgatc ggcagcaagg gaccgatcgc cagtaccaac aacagcagcg
    15181 acggcacgtc ccgccgtaac ccgaccgaca accattccaa agagtcgaac acctaccact
    15241 gccgcaaggt gaattatgac tcagcgatca gttacccgca gttggatgcc tgggcgacgc
    15301 agccgaactt tcaggcgctg atcagtcagg cgaatgcaca gcaaatcggc ctcgatcgca
    15361 tcatgattgg tttcaacggc accacctatg ccgagacgtc caaccgcagc gccaatccgc
    15421 tgttgcagga ttgcggtgtc ggctggttgc aaaaaacccg caacgatgcg gcgcaccgca
    15481 ttatcaaaaa tgtcacgctg accgcccgcg acgaagacaa caagattatt gccaaaggca
    15541 cctacggcaa cctcgacacc gctgtgtttg atgccaaaaa cagcctgctg gatccgtggc
    15601 accgcaaggc gccggatctg gtggtgatta tggcgtccga cctgctgacg tccagcaatt
    15661 ttccgcgcct caatgcgctg agccagagca accccaatac cgagttactg gccggtcagt
    15721 tgattgtcag tcaggagcgt gtgggcggcc tgccgacctt tctggcacct tacttcccgt
    15781 ccaacgcggt gctgatcacc tcgttcaaaa acctgtcggt ttactaccaa ctgggggcac
    15841 tgcgccgcag catcgctgaa gagccgcagt acaaccggat cgccacctac cagtcgtcca
    15901 acgacgactt tgtggtggag gactacggca aggtggccct gatcgacggc attcagtttg
    15961 cgcaggcagc aggcgacggc cagtaacagc caggcggggt aacactccgc cccaaccgga
    16021 gaacacacca tgctgacacc ggcacaacga cattttcagc gggttatggc cgagcgccgg
    16081 ggccaggcgg acaccgaaac ggcggtgtca cgcactgccc atgagcaaat ccttcaccgc
    16141 ctgcgcctgc atcaggccgc gctgaaacag gtgcaatctg atgcgaccaa agcggagatg
    16201 aaaaaagcca tgctgccgga atacgacggc tggattgatg gcacgctgga aggcgacagc
    16261 ggccgacagg atgaggtgat cgtcaccctg atggtgtggg cgatcgactg ccaggataac
    16321 gcactgacac tgaggctggg gcgttacgtc gttaagcatg gcctgtcttt gcctgccgac
    16381 aagttccgcc gcgatgcggt aacggtactg gctgaggaag tgagcaaccc ggtgttgacg
    16441 ctggcaacca ccgatgccga tgccgacctg agcgggtata ccgccgtgct ggatgaagtg
    16501 gccgcgattg tggacggcaa agacatgccg gatgaagtgc gcgccaagct gtgcaaagcc
    16561 cgcgccttct cgcgccgcgc agcggtggat gcgcaaacca aagccgaggc actgaaactg
    16621 ttccgggaag cgatggcccg caatccgaac gcgggagtga aacgggagat cgcaaccctg
    16681 acgcgggagc tgaaaaagct catgccgggc agcagtaacg agccggaaga cggcgcgccc
    16741 ggcgacgatg agacgaccac ggaaacaccc gccggggaga caccgcctgc ggcttcagcc
    16801 gacgccgcgc agccagcggt aaaaaaagcc gccgtgcgta acaccacggc gcggaaaacc
    16861 acacggacga cgggcaaaag caaagccgcc cgtcagtctg ccaaacgtta acgacttcgg
    16921 ccccgtccga caggcggcgc gccgggtgat ctgcccgtat acggtctttt tgcccggcgc
    16981 ccaccgcctg acttttggga gagttgagca tgagcctggt ggcttcgaaa cgtgttagtg
    17041 acggcggcga cgtgccggag attgacgacg gcgcggcggc agtcagcgcc ggggagttct
    17101 ggccggtgat cgtcctgcgc gatctgcgcc tggccgcccg catcaccggc ggtatcacca
    17161 ccacccgcct gatgcacgtc actactgaag cggtggtgca tgtgactgac cagttggcga
    17221 gctggcagca gacacaacag gccgccggat atgccgcact ggcggacgtc ccggccggac
    17281 aggtcaacgg cgaaagcatc aaggtgtacc gcttcaagcg tgcggtttat gccatcgccc
    17341 gcgccctgct gctggaggga taccgcgatg tggataccac ggccaaaggc gacaaggcaa
    17401 cggacacctt tgacagccag cgtgacgatt tatggcgtga tgcgcgctgg agcatcgccg
    17461 atatacgcgg cgcccagcgc ctttttgcgg agttgtgctg atggtagtcc gggcgcttca
    17521 gggcgatacg gtggacttgc tctgttatcg ccattacggc acatccgccg gtgtcaccga
    17581 gcaggtgatc gccgccaatc cggggttaag ccgccagatg tttctgacgg ccgggcaggc
    17641 tatcacgctg cctgatattc cccgtcagac agaacaggaa acggtgcagt tatgggatta
    17701 aacgatcttc agcgcctcaa tgatggggtg acctatggcc tgtccgtgat ggtgaccggc
    17761 atcggggtga tgaccgtcag tgaaaaagtt gcgctggcgg gcctggttat cggtgttgtc
    17821 accgcgtggc gcgcctggct gttccggcgt cgtatcgagc gcgcacaacg acgccgcaat
    17881 gaactgatcg aacagatttt acagcagtcc gaacgccgca cgctgaatgc gtcggaacgc
    17941 cgcgcggtgg ctattttgca tcagggtgac gttgacgatg aaaaccgcga ttaaacgctg
    18001 ttcgattgcg ctgattgtgg cgctcggcgt cacgctgtcc cccggcacac tgcgcacgtc
    18061 gccggaagca cagcagaaaa cggccagttg ggaagactgt cgccagtcgc cttattactg
    18121 ccccgccggg gtgctgacgg ttggcattgg ctctaccggc aacgtgcaaa accgggcgta
    18181 cagcaatgac gagatcgccc gccgctgggt caacgatatg cagcgggcag agaactgcgt
    18241 caacggcaat tttaacggcg ctgccatgcc gcaatcggcg tttgacgcca tgaccgacac
    18301 ggcgtttaac ctcggttgca gcggcctgat gtggtttacc aaccggcagg gcagcaagca
    18361 gcgcaccacc atctggaaac atgcgcaggc gcacgaatgg cccgcgatgt gtgagcggct
    18421 gaccgatttt gtcaacagcg gcggccagcg ctccaccggg ctggttaacc gccgcagcga
    18481 ctttaaagcc tggtgcctgc gtgatctggc gggtgtgcca tgaagctgac cgtcaccctt
    18541 gccgtgctgc tggtgctggc cgtcagcggc gtgctctggc aaacctacca gcgcggtatc
    18601 gaccgggcac ataccgaggc actgacagac agcgcccggc aacagcgcga actgttaacc
    18661 gaagtacggg cactggccga cgatgccaga aacgtgctgg cgcaggtgcg cgagcgtgag
    18721 caacagcgtt atgccgaagg ggaagaacgc cgtgaaaatc tgcgcgaagt tatgcagtcc
    18781 gatacgtgcg ctaacactgt ggtgcctgct gctgtcagcg acagcctgca aaaacgcgcc
    18841 gccgtcgctc agcgtgcaga tactgcacga cccggcgccg cccagcctga cggcgccgac
    18901 accgacgccc gcactgaaaa cgccggtgac ctggggcgcg gtcgcgctct ggagtgatca
    18961 gcttttggat gcgctggaca cctgcaacgc agacaaggcc gccatcaacg atttatacct
    19021 gcgtcgcctt cagcgcctga aggacgcggc cacaccatag gggaatgctc atgctgaaaa
    19081 ccaactcgct acgcaccgcg ctgacggcat ccaatacctg gtgccgggcc aacccggaag
    19141 ccttcacggt gtttgtggaa gaaggcggca ttgaaaccac cggggaaacg ccgtcgtttc
    19201 tgtaccgcta ctcgctggtg ctgttcgtga tgaacttcac cggcgatatc gacgatttca
    19261 ccttaccgct gatggcctgg ttgtggcaga accagcccga cctgctgctg aacccgcaaa
    19321 agaaccgcga ggtgaaattc accacgctga tcaataacga cgacagcgcc gacattctgt
    19381 ttgaaattcc ggtgcgtgag cgggttaagg tcacgcggga cgataacggc atcctgcgtg
    19441 ccgaacattt gcctgaacct cgtccgcgtc tcaccggcgg ggtatgggat gcggtgcttg
    19501 acgatgccac cggggaggca gcggcatgac ggataaatta tttcacgcgc tggataaggt
    19561 gtttgatgac atcctttccg gcctgtcacc tgccggacgg ctgaaaacgg cccgtcaggt
    19621 cggacaggcg ctgcgccgca gtcagcagca gcgcatccgg gcgcagaaaa acccggacgg
    19681 ctcggcttat gcgacccgcc gccgcaaggt gctgcgttcg caaaaaggaa tggtctttgt
    19741 ctgggaaggc caggtgcgcc acctgaagaa ctggcacggc ggccggggaa aatacggccg
    19801 cacgatcacc ggctttgatg aagaccgcaa cgccatccgc acgttttacc gcagcgatat
    19861 tgagcgttat atcgagatca acacgcaggc ggtgcgccgc acgaccagca agacaacccc
    19921 gatgtttcag cgcctgcgcg gttatcgttt tctcaaaatg cgggccgata ccgacggtgc
    19981 cagcgtagga tttgacggca tcgccggtcg tatcgcccgc gtgcatcagt acggcgagcg
    20041 tgacaaggtc gggtcgggcg cctttgcccg ctacccggtg cgtgaactgc tggggatctc
    20101 cctggctgat gagcgtctga tccaggacgc ggtgatcaac agtctgggga gtgccgccac
    20161 atgagcgctg aactgatgcg attactggaa aacctgttgc gcgtcggcgt cgtcacggcg
    20221 gttgacccgg caacctggcg ggtacgtgtt aagagcggtg aattgctcac cgactggcta
    20281 cgctggaaca ccacgcgcgc cggggcgttt aacgtctggt tcccgcctgc cgtcggagaa
    20341 caggtgttgc tgggttgcct tggcggtaat ccggaaaccg ccgtgattat cggtagcctg
    20401 ttcagtgaag cccacccggc acccggcaac agcctgaagg aaattgtgat caccgcgccg
    20461 gacggtgccc ggtttcggta tgacgccgta gcgggttcgc tggaagcaac cggcatgaaa
    20521 accgtcaacg tggtggcctc ggtcagcgtc acactgaata cgccggtggt ggaatgcact
    20581 cagcacctga aggcccgcac cgtggagatc acccacggcg gcaccctggc cggtaatgtg
    20641 gcacattctg gcggcgcgat gacctctaac ggcgtccagg tggataacca tcgccacggc
    20701 ggcattcagc ccggcggtag ctggacgagt ggtacacaat gaccgcgacc tataccggca
    20761 tgaatccgta tggcaccggc accctgaccg atgccgatca gctctggcag tcggtgcgtg
    20821 acattctgac tacgccgctg gcctcgcggg tgatgcgccg ggattacggc agcctgatcc
    20881 ccgacttgct ggatgcgccg cagaatgccg ttacgcggct tcagttgatg agtgcggccg
    20941 ttatcgccct gacgcgctgg gagccgcgta tctcgctgaa tgccgtcgat attcgttatt
    21001 cagcatcggg agcggtagac gtggcgttat cggggttgat taccgaaacg atgcaggcgg
    21061 ccaacgctgc catcacgctc aggggtgaca gtgatggcaa cggttgattt atcgcagtta
    21121 ccccagccgc agatcattga agtgctggac ttcgaagtca tccttcagga cgtgaaagcg
    21181 gtgatgattg ccgcctttcc ggccgctcag caggcgtccg tgaccgccgc gctagcgctg
    21241 gagtccgagc cactcaccgc gatcgcgcag gtgatcgcct accgggaaat gatgttacgc
    21301 cagcggatta acgaaggcgc ggaagcctgc ctgctcagct acgccgtgtc atccgatctg
    21361 gataatctgg ccgccaacct gaacaccaaa cgattgacta tcaccgaagc gaccgacacc
    21421 gccgatgccg tgatggaaag cgacagcgcg ctacgcttgc gggcgcaggc ggcttttgag
    21481 ggactgagcg tggccgggcc gaccggcgcg tatgagtatt ttgccaaaag tgccagcggc
    21541 aaggcagcgg atgccaaagc gatcagcccg tccccggcgg tagtggtggt gtcggtgtta
    21601 tccaccgagg gagacggcag cgcctcggct gacctgctgg cggcggtcga tgccgcgctg
    21661 tctgccgatg ataaacgccc ggttggcgac cgcctgacgg tacaaagcgc cgagatagtg
    21721 cgttatgcca ttacggcggt gttgtaccgc tatccggggc cggaatcgga gccgatccag
    21781 caggccgcac agcaggcatt aacatcatgg ctcagcgcac aggggcgcat cgggcgcgat
    21841 gtggctcgct cggccattat ggcggcgctg catgtgcaag gggtgcaacg cgttgaactg
    21901 ctggaaccgg cgcaagacat cgtgatcagc gacacgcagg cggcgtactg caccgggttc
    21961 acgatcaccg agggcggcag cgatgagtaa cagcctgctg cccccgtcag ccagcgactt
    22021 tatgcgcaac gtcgccagct ccacccagct cctgagtggg atagcggtcg atctggatac
    22081 gttatgggac gctgagcgct gccccgtcgg gttattgccg taccttgcct gggcgctgtc
    22141 ggttgaccgc tgggataagc gctggtcaga acagaccaaa cgccaggtga tcaaggcggc
    22201 ctggctggta caccgtcaga agggcactat cgcggcattg cgccgggtgg tggagccgtt
    22261 cggctatctg attcgcatta ccgagtggtg gcagactggc ggcacgcccg gcaccttccg
    22321 gctggatatc ggcgtgcagg atgctggcat caccgaagaa acctatctgg agcttgagcg
    22381 gctgatcgct gacgccaaac cggtaagtcg ccacttgctg gggctaaata tcgtcatgga
    22441 ctgcgcgggt aatatcccgc tggccgccgg gcaatacagc ggcgatgcgc tgaccgttta
    22501 cccctatttt cccgaaacga ttaccaccgg cggtgcggat atacacgcag cggcgataca
    22561 tctgtctgac aatgtgagcg tgaacgcatg acaacaaaat attttgcctt gctgacaaat
    22621 accggcgcgg cgctgctggc gaacgctact gcgctggggc ggcaactgtc gattacacaa
    22681 atggcgctgg gcgatggcgg cggcacactg ccgaccccag actcggcaca aacgaaactg
    22741 gtgaacgaac ggcgccgggc gccgctcaat tccctgggcg ttgacccggc gaacccgagt
    22801 cagattattg ccgaacaggt gatcccagag gacgagggcg gctggtggat acgtgaaatc
    22861 ggtctgtatg atgcggcggg taacctgatt gccgtcgcca actgcccgga aacctacaag
    22921 ccgcaattac aggaaggctc tggccgggtg cagacggtgc gcatgatttt gattgtcagt
    22981 agtaccgaag cggtaacgct gaaaatcgat ccgtcggtag tgctggcgac gcgtgcatat
    23041 accgacggta aggccaccga agcgaaaacc tacaccgatg ttcagacgaa caacgccaaa
    23101 attgaagtga aagcttacgc cgataacctg ctggatcagc tcgcgacgac gatgacggca
    23161 acgctgaccg aaaaaatgga taaaacgcag aacggcgcgg atattgccga cgtggcaaaa
    23221 tttctggaaa acatcggcct gacagcgcca cggtttagcg gtgtggttgg cacaacccgt
    23281 aacgccaaaa tgagcattac aacggcatcc gcgacagcga cctttaccgc agatgaaatc
    23341 attgtggccg agtcgctggg cgggcggcaa tatcgcctca gtttgtttaa cgccagcgtc
    23401 aatctggcaa tgaccggcgc tggcggtatg gacacaggag cggcaccggc ggcgggcttt
    23461 gtggcgcttt acgccatcta caacccaacc agcaaggcac cggcactgct ggcagtgaat
    23521 accaccagcg cggtatcacc tgaaatttac actggcggca acatgccggc cggctatagc
    23581 gcatcagcac tggtcagtgt ctggcgagta tcatcatcac gatttgtggt gggctatcag
    23641 tcagggcgcc atatcaatat tatgcgcagc gccgcgctca gcagcacaac gcagcatgct
    23701 gacttgatcc ccctctctct ggccgggttg gtgccgccaa atgcccattc ggtgaatggc
    23761 gacggctaca cgacaacgag cgatggctcg acggtagccg tgaatttcgc gatcgcatca
    23821 tcggcaacag gtattaaccg gtattcggcg acgcaatttg gttcactgtc gatgcctttt
    23881 tcatccgtcg ccattattga cgcccaaacg gtttattaca ccgcaaccat cgtttccggg
    23941 gcgttgacga tggccataaa cgtgagtggg tacgagatat gatttacgtt caattttctg
    24001 attcatcgca aactgacgtt gttgctgtat tcagttgccc gcaggatgaa gcggcttacc
    24061 aacatcaggg gcaggtacca gacaatgacg cacgctatct gacatttatc tctaagctgg
    24121 agcaggtcga gtaacagata acacggccct gtcgggccgt taaaacagcc ctttcaccgt
    24181 atcgatagcg cccgtcgctg catccttaac actcttcatc gcgttggttg ccgcactgcg
    24241 cgcagtgtcc atcaggtcgc taaaggatga tgattgcagc ttctcccgca ggtcttcatc
    24301 acagcgctga aagctcagcg aaaactcaat cttctttgcc ttcccgtagc gattcagttc
    24361 tgtgcgcgtg gtctgcatac ctgtcaacac gtacatgccg taaatctgcc cggtgccgtc
    24421 aatcaacggc caggggcggc cgctgtaggc ttgcgtggtt agcgcggtta acgacacttc
    24481 accaccggta atttcagggt acagcacgcc gctcagcgtg atctgatctt ccccggcgcc
    24541 aatgtattgc cattttgcgg aacggttaat ccgctcattc tttacatgcc gccaggcacg
    24601 cgactgctga agctgttgat aaggcaaggt acgcagctca aacacaaaca gcccatacac
    24661 catcatcatc ggtttttctc cttactctct gtctctgaaa ctgccacgct gaagtctgtc
    24721 gcggcgggcc agttcggcac tgaccgcatc ggccacaata cggcccagct ctcgggcgtc
    24781 ctgccgttca acaccgtgca ggtgtatatg gatttccccg ttgaaaccac tcgccgccgg
    24841 tgttctggcc gccgggcgac tgaccgggga cgcatcggcc tgtttgacgg gcagcgttgc
    24901 cgcgaccacg gcggggcggt cgctgagcgc ctgcatggtc tgcgcaggct gtgagggggc
    24961 agaaggtgtg ccgccagtga gccgggattc ctgccactcg ccacgcacgg ccagcgcttt
    25021 cggcagattt ttgaatacga tatcgccggg gccgatgcgc tttttggttt cttccagcac
    25081 gccgccggtg ttgtcggcaa tcttctgcaa acggcgctgg gtgccgctgt ccccggtcag
    25141 gggcggcttg ggcgcgggtg gaggcgcagt ggtggccccc ttcaaatcgc cagtcaggct
    25201 ggtgaccaga ccctgaagcc ggttttttcc ttccggcgtc agttcgccct tcaactggtc
    25261 ggcttttttc tgagccgcat ccagtcccga cgggatcagg ccgagctttt ccagaaccca
    25321 gccaatcccc tccatcagct tttgcagcgg ccataacagc atttccaatg ctgaccccag
    25381 caccttaccg aatccatagc ccgcgatcgc gcagtcatcc agcgtcttct ttgtggtctg
    25441 gatcgggtca aagagttgct taaaccgatc ccacaggcgc gacacggccg acacaatcac
    25501 atcaaagacg ggggccaggc cggtaaatgt ctgacgaatc gggccaagac tgataacaat
    25561 gccggtaaac atcccgctga aaaacgtttt gataggctcc cagaagcgcc agataagcag
    25621 ccctgccgcc acaaacgccg caccaatcaa cccgatcggg cttaacagca atgacagcac
    25681 gccgcctaac atcgagacgg cgccggtgat caggctccat agcgcaggca agccgcttag
    25741 ccgcaacaac aatccgccaa cgcccctgac cagtgaacct aacgccgccg ccggcgaggt
    25801 gaacacggcc agcaacatgc cgcgcagcgg ggtcagtgtc gtcgtcagtc ggcccgcgct
    25861 gccggaaaaa agctgtagcc agccgcccat gcgtgccatc ggcccgccga gcaggctact
    25921 taaccccgaa aacagcgaca gcgcgccacc gacgccccgc gaacccagca gcagtgaaaa
    25981 gccgagctgg agcttagcca gcggccccat caacaggcca attgccagcg aggtgccgcc
    26041 gattgccacc gtgagtgcca gcgcaccgcc gccggccagt aacagcgtct gcgtcagttt
    26101 ggggttttct ttcacccaac cgctcacgtt ggtgatcaca tcacttaatc cctgcgtcag
    26161 gctacgcagc ggcttatctg tcgtctcttc aacctgaata cggaagcctt cccaggcgct
    26221 gtcgaggttt ttcaggtcgc cgcccaggtt gtccgccatc tttttagcaa cggcgtccgc
    26281 ttcacccttg gcttttttca actccccaga cagttttccc agcgcgccgc taccggccgc
    26341 ctgtaccagt gtttgcaggc cgacaaaggc ttcctccccg gcgatatcct tgaagaagga
    26401 cacctgatcg acctggccgt atttttgggt cgccttgtac agatcgcgta acacgtcctg
    26461 cattggccgc atcttgcctt tggcatcggc caccgacacg cccagctctt ttaacgccgc
    26521 cgctgcggct ttcggcggcg aggccagccg cgaaaggctg gcacgcatgg cggtaccggc
    26581 atcactgccg cgaataccgt tattcgccag catgccggcc atcgcggccg catcttccag
    26641 actgatcccc agcttggccg ccaccggccc ggcgtatttc atggtttcgc cgaggctgaa
    26701 caggtcggtg ttggtgcggg taaacgcacc ggtcagcaca tcgctgaccc tatccatctg
    26761 gctcgcatcc agattgaact gcgacaggat atttgagccg atatcggcgg tttcgcccag
    26821 ctccatgcca ccggccagcg ccatattcag cacgcccggc agtgccgcct gaatagcttg
    26881 aggcgtaaag ccggccatcg ccagaaacgc ctgcccgctg gccgcatcgc gggtggtgaa
    26941 tgcggtttcc gcgccgagct ttttggcctg cgcccgcagg gccgccagtt gctgatcgcc
    27001 tttatccagt cgagtcagcg cctgaacgcg cgacatctct tcatcaaacc cgaccgccgg
    27061 ggccagaaat tgcccacccg cgtatccgac tgccgccccg cccgccaccg ccattgtgcc
    27121 gctgccgcgc agcttgcccg ccgtctgctg catccgctca tagcgggcgc gggcctgcgt
    27181 gacggcagcc agttgccgcc gctctcgctc cagtgtctgg ttatattgtt cggtgcgccg
    27241 gatggcgctc tggatggtgg cattactgcc gaccagcgac acgccatgac cgcgtaccgc
    27301 ctgcgaggca gcgcgcagct tgaccacttc ctgatcgcgg gtgatgttca accgctccag
    27361 tttggcggcc agtgaggcca tgtgctcccg ttgcttgtca gtcagcaccg tgccgctttg
    27421 ctgggccttt ttcagcccgt ccaggctacg gctggcttca tcaatcttgc gagaggtctt
    27481 ttgtacgctg tcgcgcaggc gattgaagga cttggactgt tgatccagat ccttgatggc
    27541 ggcctgggta cgtttgaggg attcagataa accgcccgca ctctggcggg cggtgttgac
    27601 cgggcgggtc aggcggtcga tagcgctgaa ggctacgcgg atatcaaggc ttttcatcgg
    27661 cttcactggc tccacttcgg atagccgccc gcgcgcgcca ggctatcacg tcgcccagat
    27721 ccatgctgaa cagttcagag ggcggccagt taaaaacaac ggcgatatcg gcgaccagat
    27781 cgtctatctg gtcgaactgc aagacggtta tgcttcctcc gtcgcctccg cgttcggctc
    27841 gccaggctcc gcatgtacta aaaaaggcgt gatggcctcc gccagccgca tgaaatcgcg
    27901 ggtatccatc gcgttgatct cggccagctt caattttggc gaggtgacgc gcgttaacag
    27961 ggtggtgatg gaatccacgt ccatattcag gacgttgacc agccgcaggc cgcgcagcga
    28021 gccagcctgt ttgatgtcgt cggtgattgc cacctggctg atggtgctgt cgccacgcgc
    28081 gatgggtgtt gccagggtaa cggtgttgtc gttcggtgtg ttcatggtca caggctccgg
    28141 gcggctggtg tggccgccat tgttaagatt gttcagttac cgagtccgag cgcggaggtg
    28201 atgcgatccg ggtagatgtt tttgccgttt ttcttgtaga tgaaattcag caggtcaatt
    28261 tccagcaccg attgatcgtc aatcgacagc ttgtaatagg tgtttttcag cgcataggtg
    28321 acggatgtgt cttcgccctg cttagactcg ccgccgtcaa tctcggtaat acgtccgcgc
    28381 atttccacct caacaagctg gctgtcgccg tcggtgtagt attcccccgc aaagcgcagg
    28441 cgaacgtcat cgatatcgcc gccgtattcc agcaacagct ttttctccat gccgccgacg
    28501 accatctgcg cttccagcgc gccggagtcc atgccgagat cgaccgccac cgagccaatc
    28561 atgccggcgc cctgaaagtc ttccgttttg cgggtcaact ttggcagcgt gacggaggtg
    28621 accttgccga tctggttgtt gccgttcaca aagcaggtga acaggcgcaa tttatgcggt
    28681 acggccattt acacacctcc cagcgacgag aacgcggaat caaaatagtc atcggtgaag
    28741 gtctggtata aggtcaggtc ttccagcggc ggtaccggcg tgtacttgta acgcacgcgc
    28801 acctgtccct gtcgtaggcc ggttgtgggg ttgtcctgaa tatcgaacca gcattccccg
    28861 ccgatcagcc tgcctgcggt caccagcgcg ctcagcttgc cgttgatgcc gttcaccacg
    28921 tctttcacgt tggccggggt aagcggttcg tcaacggctt caaactgcgc ttccgcgata
    28981 ctgtcggcga ggatttgcgc ggtacgggtg tacacctcaa acaggtaatc atgggtgtcg
    29041 gtggtgcggt tgccccagaa ccggaacccg ttgcgcttaa tcagcgtggt gatctcttta
    29101 ttgttgagtt cattggcgtc gctgtcttcg gcctgaagcg accagaacac atcacgcgag
    29161 atgcccagta cgttatttac cgccacgttc gacagcgact tatgccagcc ctgagcgtta
    29221 tcaatcgccg cacgaaggcc gcaggcatac gccggcgccg ggaaggtttc attgctgccg
    29281 gagagtgggt tataggcgat gaaatccggc cagatcacca tcagctcacg ataagcaaat
    29341 tgcgcacggt aggtgatggc ctccgccatc gtggtgcagc cgtgacaacc ggcgtagaca
    29401 aacgcccgca gattttgcgc aataacacac agcgctgacg tcacttcggc ggtgtcatag
    29461 tccggtaccg ccagaatgcg cggccggtaa ttgaccttcg cctctgccgt cagcaaggca
    29521 tacatgccgg tataactgcc gtctgccgcc gtcccgccga tgatcagttg ggactgggtt
    29581 ttttcgccgc cttcgactgc tgccgctacc cgcactacga tcacttttgg gctggtctgg
    29641 tcagcaatcg ctttcagcgt cttgtagagc gagccggttt tacccgcctt gcccagcacg
    29701 ctattcaccc gtgtgatgag caccggcgta ttcaggggaa aggtgtctgc attcgcatca
    29761 tccgccacgg ccaccacgcc aatcacactg gaatcaatgt cattgattgc ggttaccagg
    29821 tcggtatttt cacgaacacg cacaccgtgg aaacgtgtct cggacatgtt cgccaccatt
    29881 acgttattga gttcatggcg ataatccccg atatccgtcg cgcactcacg cgctgacggg
    29941 tctggccgtc cggcgacaac aaaaagccat ttttccccac gcgtgcgcgt gaaatcatgc
    30001 ggcgaaaaca gggggaaacg atggctatca ccgaactgac tgacacactt atcaatgctg
    30061 cgaaacgcta cgatgacgcg ctgaccgagg cggtaaaaag cccggctttc agcattacgc
    30121 tgggtgggaa atcactgaag gagctgagcg accggctgat ctcgctgtcg ctgaccgaca
    30181 accggggctt tgaggccgac cagctcacgc tgtcgataga cgacagtgac ggacgggtgg
    30241 aactgccacc ccgcggcgcc cagattgcgc tatccatcgg ctggcagggt gaggcgctga
    30301 cttacaaagg gctgtatacc gtggatgaga tttcccacga aggcccgccc gatgtactgg
    30361 gcgtgacggc cagaagtgcg gatttccgcg aagagttcaa cgtgaaacgg gaagtctcct
    30421 ggcatgacgt gactgtagag cgcgtggtgt cggcaatcgc gcaccgttac gggatgaagg
    30481 cgcaaatcag cgacatgctg atgaatatcg aaatcgacca cgccgaccag accgaagaga
    30541 gtgatatgtc attcctgacc cgtatggccg agcaattggg ggcgattgcc accattaaaa
    30601 acggcacctt gctgtttatc ctgcccggcg gtggtgtgac ggcatccggc aaggcgctgc
    30661 cgtcggccag cctcacccgt agtagtggtg atggtcaccg ttttcgcatc gcggatcggg
    30721 atgcctacac cggtgtgcgc gcctactggc tggatctgaa attcggtaaa aagaagaagg
    30781 tcagcgtaaa gcgccgccgg acaaagccca aaccgaaaaa ggaaaagagc agcagccgtg
    30841 aaggcgatta catcaccggc gcggaaggta acgtgttcgt gctgcgcaaa acctatcaga
    30901 atgaagaggt cgccaaacgg gccgccgcgg ctaaatggcg ccagttgcaa cgcggcgccg
    30961 ccgagttctc gatcaccctg gcgcgtggcc gtgctgagct gtatcccgaa atgcacctga
    31021 cagtaagcgg ctttaaaccg gatatcgaca atcaggactg gattatcgcc cgggcggaac
    31081 acgttattga tggcaacggc tttaccaccc gtctggaact ggaagcaaaa atccctgact
    31141 ggatagcgga aagtgaataa aatggcagcg agttcaactc ccacagggga gccattatgt
    31201 tcagatgtcc tttctgcgga gcaatggccc gcacccgtac cagtcgccgc ctgagcgata
    31261 tcaccatccg gcagtatcac cagtgtcaga acctggaatg cagcgagacg tttaccaccc
    31321 tcaacacggt agaacggcgc gtgtcaaagc gtacgcggga agacccgtta ccgcctgact
    31381 ttatcccgca agacgccttt ccggcttcgc attacgggcg agatcagttg aatctggcgt
    31441 tgtaaaacca aagccccgca ggatgagtgc ggggctttga aacaacagga aactggtaaa
    31501 agtggcacag agaattagcc tcatacacca tttaatgtaa tgatttgttt tttctttaat
    31561 ttttcctgac attgcgtagt gccaaactac tcgttggagt atgtgcccca ttcaatccct
    31621 tatctcatac ttatcttctc taaaatcgac tggatttagc attttaaatg tgatattcaa
    31681 ggcggctttt tattttttgg agaaaagccc gcatttttgc aggtttttgg tggattgata
    31741 ctgctgtttt ggatgtactt tagtgatcgt gcgtggttgt aaaccaacaa aatgtttttt
    31801 tgatttatcc cagttactgg ataaattttt tgtagtagat ttaactatga gaacagattt
    31861 cattgactcg gatcaacggt gtttcagctt ggagacttga aaaatggaaa tgaaggcagt
    31921 taagtctgta cttagttccc attgggatgg tcgtctgcct gtcagacccg atatcattgc
    31981 ccatcgtatg ggaatagatg taaatccttt gcctgtaagc tactcaggct cggagccatg
    32041 tggtatggct gagataacat gggatggtag gatggcagtc tactataaca agagtgattc
    32101 tcattctcga ataaggttca cgcttgctca tgaattaggg catcacatac tgggccatac
    32161 aaaatatcag gctaaattcc gcgattatcc tggaacgttg aacaacaccg gtaattctct
    32221 tgacgagcga gaggctaatc gttttgctgc tgaactgcta atgccagaag aagctattga
    32281 tactatgatt aataatgaag gtattcattc aattgacgcg cttgctagca cgtttgacgt
    32341 atctagagac gcaatgtatt ggcggctaaa aaacttaaat tatgtttaag tttgaattgt
    32401 aagtatcaat actgattcat taatataaag ccacttctaa tctttgggtg gcttattatg
    32461 tcaaacaata attcccatac taatggttcc tctgctacac gtcaaaacac atctgcacat
    32521 cagtctgtaa ttgaaaatga tcagtcatta tcttccagaa gtgaaaatct acagagccga
    32581 acacaagaac agtctcaagc agtacagccc aattctttta atataaaccc tggtgtagta
    32641 gctccagatt cttctggtgg tgcaacgaat ccaaaattgc ctctaaatga ctacgatgga
    32701 ccgatctctg atcaacatct caagcactct tctgataatc ataaagacag acgaaaaatg
    32761 cgctggggat tgttcagtgt cggcttgtta gcgagcattg gttttttggt gactggtgcg
    32821 ataatgtctt acctaatcat ttcaaatatg ctttcaacta atgaatttat tagggaagga
    32881 gttaatacaa taattactaa tacatcacca gaaaaaacaa aagaaattat tctccaattg
    32941 gctcctaatc cacctgaaag ccttgttcat gcgcatgatg ctgcgaaaga ggtgttgata
    33001 caaacaagga cacaacaaca agatctattg ggtaaattct tggaatcgac taactggact
    33061 tctattagcc cgatgataac actggtggca tttattttag gtgttggcct aacacttgct
    33121 atcgctttac tgagagcatt atttcgcgaa gatcaagcag aaaaaacaaa tccactttca
    33181 gatgttgcat cacctctcag taaattgata gaaaatttta ttgatttaat tatgagcaaa
    33241 tttaggaagt gaatatgtta tgcccaccaa tggtgggcat cgtatcgatg tggtcgatat
    33301 gtggacattg taagaaataa atccttttat ttcatgtgga tggtgtaatt atttgtacac
    33361 catccctgtc tttcgccctc cttgatggag ggcttttttt tggggcgagc tataggattg
    33421 tgtgactatc ctgccctgat cgtaagccat ccgttttctg caggatggcg gatatcctaa
    33481 tttttatgcc atttttgtgt gatgggatta ctgattttgt tctcttccag ggaaaaggtc
    33541 ccattctgtt gcgctattgc ctctcccgtt tcaacgatcg cattttgtat aaaatacttt
    33601 tctttgtcgc cattaatgaa tgtgagttga tgaaatgcag tctttttccc ccagtcttct
    33661 gaaggcaatg agatatatct gatggtatag gtttgatcct gaaaatttcc ctgcatgacg
    33721 taaacgccat aatgctcttc accttgcgat attattttat aaataccgtt gtcgtaatag
    33781 aatatttctg catcggggaa cggttttttc tcatagagtt tacggtagtg cagtgtttgc
    33841 ctgtaggtcg gtttaccaaa gccaacctca agtttttttt cattattatc cgttgttaat
    33901 gagcttgcct gactggggat tattgccata agccccagga agagaaatgg aaaattcatt
    33961 ttcatgtctt atctccttca cctttcttca tgttgtgtct gaaaaataat aataatcgct
    34021 ggcttagttg ctattttcag cccggttatt ttctggggga gtgatatttc tgtcatacca
    34081 atgatgttac taatcatcat tcactttcca gatctccata gttataaaaa actgaacggg
    34141 gtttgttgtg ctatcgctgt tccaaccctc gctgcgcgcg tttttgctgg cccgtcagca
    34201 taatgtcctc cactgccaca acgggctgaa atcgcttgga aaagcgtgta tcgacaggcg
    34261 tggcggtatc tgttccatac ccttgcatgg gtccctttat cgctaattct gatgagacac
    34321 gttatgagca caaaatatac cgctctgctt acccaggtgg gggcagccag gctggcgaat
    34381 gcgattgcgc tgggaaaaca gctggaaatt acccaaatgg gggtgggaga cgctggtggc
    34441 acgctgccga cgccggatgc ggcacagacc aaactgatta acgaaaaacg acgcgcgccg
    34501 ctcaattcac tgaacatcga cccgaccaac gccaatcaga ttattgccga gcaggtgatt
    34561 ccggatcacg aaggtggatt ctggctgcgt gaaatcggtt tgtatgacgc cgatgacaat
    34621 ctggtggcgg tggccaactg ccccgaaacc tataaaccgc agatgcagga aggctccggc
    34681 cgcgtgcaga cggtacgcat gattctggcg gtcggtcaga ctgatgcggt gtcgctgaaa
    34741 atcgacccgg cggtggtgct ggctagccgg cagtatgtgg ataacatggc cctg
//
