# Supplementary material for: May the Phage be With You? Prophage-Like Elements in the Genomes of Soft Rot Pectobacteriaceae: Pectobacterium spp. and Dickeya spp
Source: Front Microbiol. 2019 Feb 14;10:138. doi: 10.3389/fmicb.2019.00138 (PMC6385640; doi:10.3389/fmicb.2019.00138)
Supplement: Supplementary file 2 [file Data_Sheet_2.ZIP › Supplementary_prophagesGENBANK_files/Genbank FILES _SRP_prophages/phiD3.gb]

LOCUS       Exported               33058 bp ds-DNA     linear   UNK 02-AUG-2018
DEFINITION  phiD3.
ACCESSION   .
VERSION     .
KEYWORDS    .
SOURCE      phiD3
  ORGANISM  phiD3
REFERENCE   1  (bases 1 to 33058)
  AUTHORS   .
  TITLE     Direct Submission
  JOURNAL   Exported Aug 2, 2018 from SnapGene Viewer 4.2.3
            http://www.snapgene.com
FEATURES             Location/Qualifiers
     source          1..33058
                     /organism="prophage phiD3"
                     /mol_type="genomic DNA"
                     /note="/genome_id=6666666.356852"
                     /note="/genome_md5="
                     /note="/project=robertczajkowski_6666666"
                     /db_xref="taxon:6666666"
     CDS             complement(1..714)
                     /codon_start=1
                     /product="Phage integrase"
                     /label=Phage integrase
                     /db_xref="SEED:fig|6666666.356852.peg.1"
                     /translation="METLRRIISRLNEIFRWAATEELIEFNPADNLGQRFSKPKKQNMP
                     ALPPDDLPRFMVALSNASIRLETRLLIEWQLLTWVRPGEAVRARWIDIDEVNRFWNIPG
                     EFMKMKRPHKIPLSKEAMRILELIRPISAHREWIFPSIKAPLNHMHEQTANAAIIRMGF
                     GGELVAHGMRSIARTAAEESGKFRTEVLESALAHTKNNEIIAAYNRAEYLAERTELMQW
                     WGDYVQAQKLKAIAP"
     CDS             complement(789..938)
                     /codon_start=1
                     /product="hypothetical protein"
                     /label=hypothetical protein
                     /db_xref="SEED:fig|6666666.356852.peg.2"
                     /translation="MAKIAKKLTDTEIKNTKPAEKEINLRPLVSLQTTQKTSGGALNEI
                     FSPV"
     CDS             complement(1198..2289)
                     /codon_start=1
                     /product="Phage integrase"
                     /label=Phage integrase
                     /db_xref="SEED:fig|6666666.356852.peg.3"
                     /translation="MAVRKLASGKWLCECYPFGREGKRVRKQFATKGEALAFERFTMEE
                     SENKPWLGEKADNRSLREIIDLWFSLYGRTLADPKRMMAKLDIICAGLGNPKARELSAA
                     DFAHYRELRLAGQMTDASGIPMAVVKPRTVNLEQRNLSAVFGTLKKLGHWDAPNPLSGL
                     PTFKIAQQELAFLAPNEIKRVLDACAESANPHLLLVTKICLATGARWSEAEGLSGQQVT
                     PYRITYTRTKGKKNRTVPISRELYDEIPRKSGKLFSPCRKTFERAINRTGIQLPDGQCT
                     HVLRHTFASHFMMNGGNILVLRDILGHADIKMTMIYAHFAPDHLEDAITKNPLNGLNWS
                     PKNGGKLAAANGNQAFSSPLITR"
     CDS             2325..2447
                     /codon_start=1
                     /product="hypothetical protein"
                     /label=hypothetical protein
                     /db_xref="SEED:fig|6666666.356852.peg.4"
                     /translation="MYKNSHQCMDVVRANKWQKVVRGNGKTEGGMFYYFFKVKE"
     CDS             complement(2455..3963)
                     /codon_start=1
                     /product="Putative phage protein"
                     /label=Putative phage protein
                     /db_xref="SEED:fig|6666666.356852.peg.5"
                     /translation="MVLGKELNFNWEEEVDIELDGEKETLPPDTLDRRKYAEYLYFYLS
                     ERKSKNTVVNLNAEWGAGKTYFLKRLYTSIKEKHPCIYIDAWKQDFSDDAFLTLFSSLI
                     NQIETYSGRIDAKLIRAAEAIGRFTKGVIPEITSAVIKQYVGIDDIAKIAQTASKLMLE
                     QHQKKLKSIATLKKELGFWSDLAFNKGYEAPVFIFIDELDRCRPDYAISLLEIVKHIFS
                     VDNFIFVIATDTEQLQHSIKNVYGEGFDANLYLSRFFHRRFSLHAPDIKTLVSTLIRDR
                     IKDDFEEIHKTLFPINDMEDMTNNCASIMDAIKMNIRDSIKTIDRFCDIIKSQKSKNID
                     YILLLTMLSLNEMDKSACNVLTGIKSRKGPWAEFLLGNDKLFYLTKNTVNITMDSSPSN
                     TGVDKLIVNDYVSQRNPTTKEVINLTFCKLIEQVEFQMARCELINSPNLEDKKQLITIY
                     DSQQKHDNQEKINFQIYGLWNKNKKNFHTIKNYIDFMELAVAFD"
     CDS             complement(3988..4926)
                     /codon_start=1
                     /product="hypothetical protein"
                     /label=hypothetical protein
                     /db_xref="SEED:fig|6666666.356852.peg.6"
                     /translation="MEKEISQKKLIELLKYYHEKGVISDDYYHEAIELVVEECDDSINK
                     EIVSYLFKKGKEKEIFIEKIHPSLEEENKKLKLKISDVENDLSIAKSERNVLFSKMRGH
                     IDTISSQEERISTLERENKELIEKSQQNRIDDKIPEYVLSVKEKLNSDDRFFIDMSNNW
                     AFYGALACIIAVIAAFCTFSTGIEKIIENKENSAIVIFYIFSRGLLAIGLLSWLSYICF
                     SNARKYTHESIRRKDRQHALMFGQIFLQIFGGTATKDDAIKVFKDWNMSGDSAFSSKTE
                     SPPNALSIIESIKETFTSKNKKDSDNRKTDE"
     CDS             complement(4937..5503)
                     /codon_start=1
                     /product="Repressor protein CI"
                     /label=Repressor protein CI
                     /db_xref="SEED:fig|6666666.356852.peg.7"
                     /translation="MDFKTGGRKVIERLVEAYGFTTRQALCDHLGVSKSTLATRYMRDL
                     FPAEWVIQCTIETGVSAQWLTTGEGPRFNDARNDVIAIPRQKLIDGKLYDSNYYMFDKA
                     FLSDGLKDPVAILDGDITYIADRQFDEVVDGKWLVEIEGRTSIRDLTRIPVGKVRVSGT
                     GAEFDCGLGDIGVSALIKTQIENLT"
     CDS             5633..5854
                     /codon_start=1
                     /product="hypothetical protein"
                     /label=hypothetical protein
                     /db_xref="SEED:fig|6666666.356852.peg.8"
                     /translation="MRPQISITLAVPSVSIEKYSELTGLSIDTINDMLADGRLTRHRLR
                     KDKKREKVMINIAAMTVDALADCDISLN"
     CDS             5887..6396
                     /codon_start=1
                     /product="Transcriptional regulator"
                     /label=Transcriptional regulator
                     /db_xref="SEED:fig|6666666.356852.peg.9"
                     /translation="MFDYQIAKQTHFDEACRSFSLCHNLAELARTAGMNQQILRNKLNP
                     DQPHKLTCEELLTLTDITEDATLIDGLLAQLNCLPAVPVNEARAERLTAYVLQATAAVG
                     KVAAESVSDERMTQTRRHNLMSTISDGVRYLSLIGMTVQSRIQANPAMASTLDALSGLG
                     ASLTIG"
     CDS             6493..6648
                     /codon_start=1
                     /product="hypothetical protein"
                     /label=hypothetical protein
                     /db_xref="SEED:fig|6666666.356852.peg.10"
                     /translation="MQKPISIAPFLRNNQTGASLPVEVRHGKGKQGIIIRPDGRRWNPP
                     KGAFNR"
     CDS             6661..6990
                     /codon_start=1
                     /product="hypothetical protein"
                     /label=hypothetical protein
                     /db_xref="SEED:fig|6666666.356852.peg.11"
                     /translation="MSQSVDHQKWIQRCRDIVFKGESRAQLFWERAALDTREIILFSAK
                     PKLKSRHVNYSWHQFTAEERAAIWSAIKRIRSICDETALFGPDDFLRTSNQNGTSNTPN
                     PSPIH"
     CDS             7086..7292
                     /codon_start=1
                     /product="hypothetical protein"
                     /label=hypothetical protein
                     /db_xref="SEED:fig|6666666.356852.peg.12"
                     /translation="MNAAADGALIELLNKARLEERKDQHFSFSLRLAALAVRVQQRDLS
                     AAEVVELIRQESERFEHSAQELI"
     CDS             7292..7615
                     /codon_start=1
                     /product="hypothetical protein"
                     /label=hypothetical protein
                     /db_xref="SEED:fig|6666666.356852.peg.13"
                     /translation="MDMPQNPAYNRVDINGCYAIAKVGYDFALGEVQCDNRDGAQPYLS
                     TLAVYQTPITLVNDFVHRSLCAEIRRGTVTDITTMLTEAERLSLLCLNAFEQLENTGTG
                     LSE"
     CDS             7612..9654
                     /codon_start=1
                     /product="Putative replication protein"
                     /label=Putative replication protein
                     /db_xref="SEED:fig|6666666.356852.peg.14"
                     /translation="MNPEHNGAYHVVNQWRREQFTRNEPDGLTYVERSLWHLNPLDHQW
                     RQQYLAGMPDYLAKYFGQRYEKLFTSDEHKGRRRANTFLLRTLGKSVLPRLRTVTERYQ
                     TQQRAAGDLPFPFYDDLEKLPVYDRDNIRALSQQVADFMAASLRDYTENRIRNTGEITD
                     RYITLLSFRHLGLLTLQAGTQPPYWAQFTKGRHPLSTEKAESGLLRMMSPEWWRARLKR
                     RRDIQREHMAIAVGQVQKAASPYVSRSTLDEWKEQKRRNREFFKAFELEDEEGNRVSLD
                     DKVNASNANPAIRRCELMVRMRGFEDLAQEMGCAGEFYTITAPSRYHAVHSGGGFVEQW
                     SGASPRDTQKYLCGVWARIRAELSREEISVFGFRVVEPHHDGTPHWHLLLFMRPEHIEQ
                     VRDIMAYHARREDADELNSEKAQKARFHYEPIDPEKGSATGYIAKYISKNIDGYALDGE
                     ADEETGENLRDMAKAVSAWASRWRIRQFQQIGGAPVTVYRELRRLGDKQLDNAAMDAVL
                     AAADVGDWAAYTQAQGGPLVSRDALVVRLSYEVTERANQYAEDVQKVQGVYSPLLGERS
                     AIVTRTVQWKIVPKQAAASAGAGVSGGSAAAWSSVNNCTPRLRRRLSELLHLRGFPPDP
                     ELVDVLIRGGNLAMSEGRALKMVNGRLEEVRQTGDCELWPGWNWG"
     CDS             9708..10685
                     /codon_start=1
                     /product="hypothetical protein"
                     /label=hypothetical protein
                     /db_xref="SEED:fig|6666666.356852.peg.15"
                     /translation="MYYISCLEIIVFTYSASIKGNDEMKNNSAISRIEKIIYRIKDGAF
                     NDSDVELFFVTLRELKNATRNIVEIGSFVAHNHCRDKGLISDYILRNYLFLSVRVGMDN
                     FLANSSRGEFPKYFPVLIKLQLKMFDNAHFKKKFGLKGGEINRIRYCLNDKGSYLIDGD
                     VCRLNRNVGKKELLIINEVLSLLNCSDGINFDDLIIEIKKLLSSEIKGFDVKIIDEEKL
                     SIFCVIVCLLNNVSFLLLNDVRAETIISIERDQTVGVCVKYSLMVPGVEGDTVQMINPV
                     FYSRYDKKDVFNHDITMGDIESGNLQFSKSHGRIVKINSEMTIV"
     CDS             10955..11110
                     /codon_start=1
                     /product="hypothetical protein"
                     /label=hypothetical protein
                     /db_xref="SEED:fig|6666666.356852.peg.16"
                     /translation="MDREFEQSLIVERIAFLAKNAGMEGNDERDRQIALIWIAELAGQL
                     MTLQAA"
     CDS             complement(11117..11437)
                     /codon_start=1
                     /product="Phage protein"
                     /label=Phage protein
                     /db_xref="SEED:fig|6666666.356852.peg.17"
                     /translation="MGHKTLKFSHVLEAGAWNMRVLKIECPECGAKAVIRKTNRKHRQI
                     ADIYCACSDVECGYTFVMNLTFSHTLSPSSKTGDQLLQTVLNNLKPEQRQMALDLLKTA
                     AA"
     CDS             complement(11437..12465)
                     /codon_start=1
                     /product="Phage portal protein"
                     /label=Phage portal protein
                     /db_xref="SEED:fig|6666666.356852.peg.18"
                     /translation="MKRTSHRRQKAQNAPRKKMSIITFGKPEPVLTTGTDYRDVWYDNE
                     FNHYTLPIDRLALAQLVNLNGQHGGILYARRNMVASDYQGGGLSHDDMLAAAFDYLTFG
                     DIAILKVRNGWGEVIALTPLPALYTRIRKTGEFVVLQKGEPLVYPPEDVIFIKMYDPQQ
                     QIYGLPDYIGGIHSALLNSEAVIFRRRYYHNGAHTGGILYTSDPNMTDEIEEEIERQLA
                     SSKGIGNFSTILVNIPNGDKEGVQFIQMGDISAKDEFANVKNISAQDVLNAHRFPAGLC
                     GIIPQNAAGLGDPEKARNTYRKDEVIPIQRRFMASINKDPEISQNLHLIFDFADDTTIQ
                     GA"
     CDS             complement(12462..14237)
                     /codon_start=1
                     /product="Phage terminase, ATPase subunit"
                     /label=Phage terminase, ATPase subunit
                     /db_xref="SEED:fig|6666666.356852.peg.19"
                     /translation="MAKYSDELIGVARLLYLKRATPKEIAADLNLPNARIIYYWAQKFG
                     WADLLSAESTEEAIERRYQLLAGRDKKTELELQEMDMLIAHAVKLRAQSNKHKEKLAAA
                     GHGNTPGPRGNDDDERPSKKRQYRKNDISSLTKEDFDAWADEHLFGYQKHLRLNIGQQV
                     RNILKSRQIGATWYFAFEAFENAVLTGEPQIFLSASRAQAEVFRSYIVNIAQQYFDITL
                     TGNPIRLSNGAELRFLSTNKNTAQSYSGHLYCDEYFWVPNFARLNEVASAMATHDKWRT
                     TYFSTPSAKTHQAYPFWTGEEWKRGNKKRAGVNFPGFDELRDGGLLCPDGQWRYVITME
                     DAIRGGFNLASLEKLRNRYNVDTFNMLYMCVFVDNKDAVFSFDDLERCGVDPATWQDHD
                     PTAPRPFGNREVWGGYDPARSGDLSTFVIVAPPIYEGEKFRVLLVVNWHGMNFRYQANQ
                     IKKLFQRYHFTYIGIDVTGIGAGVFENIQHFAMRQATAIRYGVETKNRLVMKAADVVES
                     QRIEWDQDEKAIPASFMAIRRTTTASGNAMTFIADRSAETGHAEAFFAIAHALDNEPLN
                     YENKPQSRWRLKKAA"
     CDS             14394..15230
                     /codon_start=1
                     /product="Phage capsid scaffolding protein # Fam Scf032"
                     /label=Phage capsid scaffolding protein # Fam Scf032
                     /db_xref="SEED:fig|6666666.356852.peg.20"
                     /translation="MSQLMTNWICIATEGETVDKRVMERQWLIDAAETYDPLFYAALIW
                     PEHEEWFGNMGEVLALKTETGDDGLLRLFAQLRPNHQLLQANRDGQLLFCSVELTPDGN
                     FRGTGKTYLEGLGVTNTPASVGTTRLRFSSKKRGRLFGALKPLVIDEVKEIKGNSMASK
                     SWHSLFGIKPKAFAEGEGENNDAGGGDKLQALAEALAELESRVTALESQQSQTTDAVEA
                     VQDDMDTVKEVVDTEDFATLRNNLPKILSNFGKLDRSITKLPQRQVGNKPKGFNFL"
     CDS             15285..16313
                     /codon_start=1
                     /product="Phage major capsid protein #Fam0066"
                     /label=Phage major capsid protein #Fam0066
                     /db_xref="SEED:fig|6666666.356852.peg.21"
                     /translation="MFLNQRAREYLSAYSVGLAQEYGVADTARYFALTDPKETQLRAAL
                     LERVDFMSMINVLDVDQLSGQVVSVGSSALHTGRKEGGRFIRQVGVDGNDYKLVETDSC
                     AALPWDLLSVWANAGGEDEFFQLVQAFSNEAFALDMLRIGFNGTHVAKSTDPKENPNGE
                     DVNIGWHQRMKGFKDGQQIITDRVVLDENGDYKSLDAMASDLINAKIPQQYRNDPRLVV
                     LVGADLVAAEQYRLFQKADRPTEKIAAQMLDSTIAGRPAIVPPFMPGKRMTVTTLSNLH
                     IYTQRNTRQRKAEFVEDRKQFENKYLRNEGYAVEYPELYASIDESAVTIGTVAEPAEKE
                     KA"
     CDS             16317..17018
                     /codon_start=1
                     /product="Phage terminase, endonuclease subunit"
                     /label=Phage terminase, endonuclease subunit
                     /db_xref="SEED:fig|6666666.356852.peg.22"
                     /translation="MALSPAQRHNARMVAEQQLSRCQAVSGDHSLHVQLRALENDVARL
                     RSQPTLRDRIEMKRRELLPRWLPTVQRYLDSGEVYQNSVFAHCVVWLFDVEEFDQGLAW
                     ADIAIAQGQCTPDNIRRTFAAFVADTVLAWAQQTADMGQSVEPYFSRTFKNVAEHWRLH
                     EEITAKWFKFAGLLLLRDEQGQPRATAAADIDTLTAADALLHQAEQFYRQVGVGTMRRN
                     IAARIRALQKE"
     CDS             17115..17567
                     /codon_start=1
                     /product="phage head completion protein (GPL)"
                     /label=phage head completion protein
                     /db_xref="SEED:fig|6666666.356852.peg.23"
                     /translation="MFSGTPVDYQDEQLTNNGFWPDLNVRDFQSQRTIPADLAADTVAQ
                     ALLAAVGEVNADLAEVEARSRAKGFTRAQDVPGVSLKGQNVLCAQYQKAVFARAKADLL
                     GEFATIGRRESHPGQEGDDTRKGLLGEAAMVIRRMKGLKRATVRMV"
     CDS             17564..18061
                     /codon_start=1
                     /product="hypothetical protein"
                     /label=hypothetical protein
                     /db_xref="SEED:fig|6666666.356852.peg.24"
                     /translation="MSKLDDLTTFVSTHLPPRVMQGFDSFMDEVSFIPARRDLGEDQYQ
                     LAVMKFDAVLSWERWPYRVCDPRNLCALLLVWQEGQDDVPYMDAGLDMELPTLDVDVRD
                     QDSAIVVVSLQLAESLAIVVDDNGIIPFDGRRWRLTSPEIWQATSGHLFGAGDDGAEVG
                     AS"
     CDS             18058..18762
                     /codon_start=1
                     /product="hypothetical protein"
                     /label=hypothetical protein
                     /db_xref="SEED:fig|6666666.356852.peg.25"
                     /translation="MIVHGELSQSQLAELRTALQRLTLPPKKRQRLLWRLAKYGVIAAA
                     KRNVRAQQAPDGSAWAARRGHRRGRMLRNLPNLLHIREMPEIQAVRIYLQGGGYRNGKT
                     PVPAGVVGYSQQNGMSVSVKRSQVGNGRPEPGRMATRRQARKLRALGYRVKRGARWRKP
                     PYREIEETLSFAQAGLLIRKLSGKAAKTAWTVDVPARPFLGMNDAEFTKALARQLQGIG
                     FGWDVKAQDIKG"
     CDS             18765..19880
                     /codon_start=1
                     /product="Conserved hypothetical phage protein"
                     /label=Conserved hypothetical phage protein
                     /db_xref="SEED:fig|6666666.356852.peg.26"
                     /translation="MSWPTVQVNQVNQLQGETSEIERVVLFIGEGAVDAVKTVPVNTQS
                     DLDQVLGAADSVLKRDVSAAMVNAGQNWSAFVCLLPPKGDWVSAVSAAQQVASVEGVVV
                     SLPATKGIIAQASSLRSTLVSAFGRWVWFLLAVDGPKEGEGWDKYLQSLSNLQNGAAAP
                     AVQLVPRLWGNEPGVLAGRLCNRAVTIADSPARVQTGALLAMGRTDLPVDGTGVTLDLA
                     MLQALEKQRYSVPMWYPDYDGYYWSDGRTLDVEGGDYQAIENLRVVDKVARRIRLQAIA
                     KIADRSLNSTPGSIAAHQGYFAKTLRDMSRSTQINGITFPGEVKPPKDGDVVIAWRSKT
                     AVEIYLVVRTYECPKGITVSLVLDMSLEGSA"
     CDS             19877..20332
                     /codon_start=1
                     /product="hypothetical protein"
                     /label=hypothetical protein
                     /db_xref="SEED:fig|6666666.356852.peg.27"
                     /translation="MTKRISGQSFDFNMDGALVHAEKVSLSITDNTAAAQTQGIPDGWV
                     AGDVAAEGEMELSTKSLAVVTAKASSAGSWRGIEPVDLMWYAKAGSEEMKVEAFGCKLI
                     LSDILDVDPKGGSVMSHKIKFVVTSPDFVRINGIPYLESELTEKLIG"
     CDS             20341..20646
                     /codon_start=1
                     /product="Phage holin # possibly family II"
                     /label=Phage holin # possibly family II
                     /db_xref="SEED:fig|6666666.356852.peg.28"
                     /translation="MQEYEKNALGLLVLGALIALGKLLASDEKITPRLFFGRMILGSAT
                     SMAAGAALLWVPGLSPMAVTGLGAALGVAGHQAVEIWLRRRGSGLLKGSDAKDDVK"
     CDS             20633..20974
                     /codon_start=1
                     /product="Phage protein"
                     /label=Phage protein
                     /db_xref="SEED:fig|6666666.356852.peg.29"
                     /translation="MTLSEKQQLFTQLVAQLIQWAGERGYRLTFGEAYRTPEQAKLNAR
                     SGSGIANSLHTQRLAVDLNLFINGEYQTRTEAYLPLGEYWESLGGCWGGRFTSRPDGNH
                     FSLAHNGVR"
     CDS             20974..21330
                     /codon_start=1
                     /product="hypothetical protein"
                     /label=hypothetical protein
                     /db_xref="SEED:fig|6666666.356852.peg.30"
                     /translation="MDGLWRVVAGLTVAFAAGWQTASWQRDSIDLAVTRAATAAAEQSR
                     QALQALASQSGAALESKLEALRNVPNKTVYREIVKPVFTNVCLSAEFVSLYNDAVNNTE
                     RVLSGKPEKEMSGH"
     CDS             21287..21466
                     /codon_start=1
                     /product="hypothetical protein"
                     /label=hypothetical protein
                     /db_xref="SEED:fig|6666666.356852.peg.31"
                     /translation="MSYQESLKKKCPVTNLPRLSGATGNDAAQPLIGWPQIYADCAARH
                     NQLIDEITQRENMQ"
     CDS             21463..21720
                     /codon_start=1
                     /product="Phage protein"
                     /label=Phage protein
                     /db_xref="SEED:fig|6666666.356852.peg.32"
                     /translation="MSKITLSVSGKELSFEPNTVAYNGMINDMAMDNKVAPAVTYLRRI
                     VVAKDKETLDELLKLPGAALQITEAVNAQYAPKLEIEVKN"
     CDS             complement(21782..21916)
                     /codon_start=1
                     /product="hypothetical protein"
                     /label=hypothetical protein
                     /db_xref="SEED:fig|6666666.356852.peg.33"
                     /translation="MLHESPFNASAIPFATEIRIFSQCVFASQTARARLSASSFSAGK"
     CDS             21908..23872
                     /codon_start=1
                     /product="Phage-related tail protein"
                     /label=Phage-related tail protein
                     /db_xref="SEED:fig|6666666.356852.peg.34"
                     /translation="MKQLDFTLSLIDKLTRPVKQAQAAVTGFAKSSRDAFSKIAVGGAG
                     LIGTAMSIQGALGPAVEMHGAMVEASARGVDDSALQKINANALKFSTQYGRSALEYVQS
                     TARINAAVGTLTKEDLPGVVRASNVMAAALKATADESSEFMGQMFANFRSDAESMGNVQ
                     FAEQLAGKAAYMRNAFGVELGAIKDLMEGARGVGTNYGIGMDEQLAVMGELQRTLGTEA
                     SSAYEGFLSGAVKGAKKLGLSFEDSNGKLLTMPAMLEKLRGKYGASIEGNLKAQSDLDD
                     AFGDSAAVIKQLYGNVGVLQRHITELGSNDGMKRATEMAQKMSSPWERLTAIWYAIRAA
                     MGATLLPVLYPLINKMADGGQVLVRWLNMFPNITRVIGYCVLAVLSLAGAGAIANIVMG
                     VSVFVLGGLKGLWKGLTAIMKIHVGVIWLYNKAVLAWAATMRILRGVLLAVRMASLLTG
                     VAFNIALWPVLLIIGAVALLVAGCYLLIRHWDGIKNAITQTDMWKTVAEKVQWVAEIFG
                     QAWQAIVDGWNVVVNAIGNFSLSETMGNMVDGVGKLFSGLWDGILASFNASYRWIIGKL
                     NAIPGINIAMPESTPRPGGEGLLTGGKIKGIDSGGLQRDISNSNAKNYTDNSRKVENLT
                     IYANKGFTPEQLTEWEALR"
     CDS             23872..24201
                     /codon_start=1
                     /product="Phage protein"
                     /label=Phage protein
                     /db_xref="SEED:fig|6666666.356852.peg.35"
                     /translation="MDDVKYIDLLITERDFSLNAGREPIFCNNRISIGQDCIHAIIESG
                     LTTKLVAERSPTLRADVLTQMIILVEDDERIIPGTVVISEESPTRLWVTAETYDFGPIT
                     ARVDV"
     CDS             24198..25382
                     /codon_start=1
                     /product="Putative bacteriophage protein"
                     /label=Putative bacteriophage protein
                     /db_xref="SEED:fig|6666666.356852.peg.36"
                     /translation="MTEKPKIDYEQVLKEAGMPVTAETVTEQFQAQVTASGLVTNTSRM
                     SPFWRLISVMVTTPVIWLKDVLISVVLANMYLATASGSFLNLFAWGVNLSRKAATAAAG
                     VIRFYKSDAAQAVVIPAGTLIQTERINGTVFSVAVSVDTVIAAGLASADVPVTATADGG
                     AFNLAPGYYRILPVGVVGIERVENQDDWLLTPGADEESDDDLRERCRNQFNLVGNYHTD
                     AVYRSMIAAVAGLSIDRIFFQHDAPRGPGTANAYLLLDSGVVSQPFIDAVNDYITAQGH
                     HGHGDDLRCMALPETQHELTVTVYVRNLVNVTDEALAALRSGCQDLVRCAFRENTGYDV
                     AKTWPWSRFSFSTLAQELHDAFPLIASLDFSLGDIVSGLNVPRLASLSVVIADA"
     CDS             25375..26007
                     /codon_start=1
                     /product="Phage protein"
                     /label=Phage protein
                     /db_xref="SEED:fig|6666666.356852.peg.37"
                     /translation="MPDFKEQLAGLRLPSWMDKGEPAALLNASKAYWLQVHDWLRWPLQ
                     QLDVDTCAEPLLNVLAYQRDISRLKGEALTLFRRRVKYAFVNAQDSGSVAGFIAIFERL
                     GIGAVTLAERQPGYDWDVILVRINDEQLSGYNALMMSLVRQYGRTCRRYAFDLWNGETQ
                     SVQSGEFEHNAEYYHAVSLMPAGTVTARVALHTVRTSASTEYYSANV"
     CDS             26016..27437
                     /codon_start=1
                     /product="alternative bacteriophage tail fiber C-terminus"
                     /label=alternative bacteriophage tail fiber C-terminus
                     /db_xref="SEED:fig|6666666.356852.peg.38"
                     /translation="MAQSVITHAFETWNVQRVLDGTAARPDQVVFARVPGQDESVPVDR
                     NEGLPPADQIQHTAAITQAGVLNENAVVYSVVLDTTVGDWDYNWIGLLDSKTNTVLMIV
                     HVRTQQKLATRNGQQGNSLTRNLMMQFDGAAAATQINVTADTWQIDFSARLAGIDERIR
                     IENMDRYGSSAFFGNAYQVVKDGNAYVVKAGVAYAAGLRAWLSSDLKITVDALPTRVFL
                     DVCWRGEFTQAWAVDSQIVVANSADHEIRDGVQHYLLPVADIDENGNITDWRKQGGLAE
                     QNAQTLYLRKDDNLAALRDKEASRKNLGLGQLAVMDTDTARQTLRITQLENELVGIPLP
                     YPGATAPDGWLKCNGQSFNKSMYPLLAGRYPSGFLPDLRGEFIRGWDDGRGVDAGRSLL
                     SAQTQTVQDHKHVGTMVNSNPLQTGMNTGIGLLSQYTSTPTVGYSNEISSGGTAEGSKE
                     TRPRNVAFNYIVRAA"
     CDS             27437..28057
                     /codon_start=1
                     /product="Tail fiber assembly protein"
                     /label=Tail fiber assembly protein
                     /db_xref="SEED:fig|6666666.356852.peg.39"
                     /translation="MANYSVNVKETTLDKDGHAMMAGWITVFHVDAKTREYRGASYEYL
                     MAGVGIPADSYSDAPELPPEGKALCRAADGLSWMSVPDYRGRVAYDTQTRLSTEITVPG
                     QLPETLTLLAPVSEFDIWNGKKWVTDTDAQHQAYVNSAMQELNERFTTANTRIQALSDA
                     VDMELATEEEKALLGKWKEYRVLLNRVDLNTAPDIVWPEAPAV"
     CDS             28114..28755
                     /codon_start=1
                     /product="hypothetical protein"
                     /label=hypothetical protein
                     /db_xref="SEED:fig|6666666.356852.peg.40"
                     /translation="MLPVHPWIYGVGNVTDNGHYLSPANAVAYLAERLGTAADNLTVCV
                     WMVCGSGLGEFLQALDALTVVFPAPALSQVARQARAMAELATVKMQIPAKSRTLPAAAS
                     LSVARCRQALNAQRMAAAQQQATVPMGLNALKGMAERFTSQRDAALSEISQAMQQMAQC
                     SALAWVFTGQGAPGVIAAEMLKNNPQAIRDLYCGHDVYRERAGCVGEHDP"
     CDS             28752..29279
                     /codon_start=1
                     /product="hypothetical protein"
                     /label=hypothetical protein
                     /db_xref="SEED:fig|6666666.356852.peg.41"
                     /translation="MSQIITLALDGEAIPLRGLTVTPSMQFEEKDQSGQTSSTANAEQG
                     IKPKELRVSGVIPFTEAKVLTRLFTLAEAKEGSKLKRYRVANPTAQAINFRLATFTGSI
                     DAPKQDSKQAWLVTFTLREHISVSEKRDARAGNQTETKKQAPGQGSAAGEGDEKLSWFE
                     RKVLKPVNDALG"
     CDS             29304..30935
                     /codon_start=1
                     /product="Hypothetical bacteriophage protein"
                     /label=Hypothetical bacteriophage protein
                     /db_xref="SEED:fig|6666666.356852.peg.42"
                     /translation="MLSGDAVHVVDANVVLELNACGRGFITVETEQDYTGKLVRLDVGY
                     TDLVLRWFTGYVERSQPAENGYQRLFVRELAGVFDRMWPCSFQHPTLRQLADWLSEHSG
                     LTVHLPDAGYVSQPIPHFTHSGSGHQLLANIGAAFGIDDYVWQPLPDGALYLGSWADSL
                     LAGAPVIIPAEFSQAQAAGNSMTLPLIQSVRPGAVVNQQRLSRVQLLNESMTIEWVPVS
                     TVTGKAAQRTPAQRQIDTVYPELSAGLHLPKFARVEAPSEAVSSGNIADPFRPRYAVDL
                     QLLDADGKPAKDTPVYPAVPLPVPMAGSEAGLFQFPPPGTLVEVGFTGGRPDKPFVRQT
                     VASGQSLPDIKPGEQLQQQRAEVSQRVTVAGDWERKTDQAIRESSMHREVSADEERRTL
                     VTRETLIKATDSATVLGTHTLQAGAIVQIAQGDYSLATQAGYTASVGQSATVEIGQSLT
                     EKIGQLRRSIAGARQELMAPVVWVGSQQVNVMTLMLDTLDVIQELATQTASHTHPNTGT
                     PLNAGEIQQTGRRTGTLKDKYSPIIG"
     CDS             complement(30997..31113)
                     /codon_start=1
                     /product="hypothetical protein"
                     /label=hypothetical protein
                     /db_xref="SEED:fig|6666666.356852.peg.43"
                     /translation="MSVHFVGALAASAGYRQRRNGLAWRGEVTGKGRGIAAR"
     CDS             31236..31463
                     /codon_start=1
                     /product="hypothetical protein"
                     /label=hypothetical protein
                     /db_xref="SEED:fig|6666666.356852.peg.44"
                     /translation="MPTENSERNFSVFQFFGSRLDRYEILNIRNKRILYGFCCLGWIPE
                     CIEGVTSGGAVCSNDAGFGVVRLFAGTEKR"
     CDS             complement(31489..31992)
                     /codon_start=1
                     /product="hypothetical protein"
                     /label=hypothetical protein
                     /db_xref="SEED:fig|6666666.356852.peg.45"
                     /translation="MALTKCKECKKEVSTSAKVCPHCGVKNPGTTAGQAIGGFVVLVLL
                     VWGAIKIFGGSDDKPAAKADTPKNCAANDGQCLFDKNWIEAASRCRPLIEKSSKYDFEW
                     TDGMMTPMFSHFRLNEAKKQMTFIGDKVKFTNGFNAKITMTYNCTYDLQGKSIVDFGIT
                     EGKL"
     CDS             complement(32576..33058)
                     /codon_start=1
                     /product="tmRNA-binding protein SmpB"
                     /label=tmRNA-binding protein SmpB
                     /db_xref="SEED:fig|6666666.356852.peg.46"
                     /translation="MTKKKAHKPGSATIALNKRARHEYFIEEEIEAGLALQGWEVKSLR
                     AGKANISDSYVLMRDGEAYLFGATFTPLHGASSHVVCDPTRTRKLLLNQRELDSLYGRV
                     NREGYTVVALSLYWKNAWCKVKIGVAKGKKEHDKRDDIKEREWKLDKARIMKNAAR"
ORIGIN
        1 tcatggagca atggccttaa gtttttgcgc ttgaacgtaa tctccccacc actgcatcag
       61 ctctgttctt tcagcaagat actcagcacg attgtaagcg gctataattt cattgttctt
      121 ggtatgagct aaagctgatt caagcacctc tgttctaaat ttaccacttt cttcagcagc
      181 cgttcttgct atagaacgca ttccgtgggc gaccagttca ccaccgaaac ccatgcggat
      241 aatcgctgcg ttagctgttt gctcatgcat gtggttaagg ggagctttga tacttgggaa
      301 aatccactct ctatgagcac tgattggtct gattaactca aggatacgca tagcctcttt
      361 gcttagcgga atcttgtgag ggcgcttcat cttcataaac tcaccgggga tgttccagaa
      421 tcgattaact tcatctatat caatccaacg agcacgtact gcctctcccg gtcgaaccca
      481 tgtaaggagt tgccactcaa tcaatagacg tgtttcaagc cgtatagacg cgtttgacag
      541 ggcaaccatg aatcggggga gatcatctgg tggtaaagca ggcatgtttt gcttcttagg
      601 cttactgaat cgctgaccga ggttatcagc agggttaaat tcaataagct cttctgttgc
      661 agcccaacgg aaaatttcat ttagacgtga aatgatacgg cgtagggttt ccaatacgcc
      721 tcgttgttct atggggtcaa ggtgttgttt taagagcttg ggacggatct ctttgatagg
      781 aacgttgcct aaaccgggga aaatatttcg ttcaaggctc cgccagatgt cttctgcgtg
      841 gtctggagag ataccagagg tcttaggttg atttcctttt ccgctggctt ggtatttttg
      901 atttcagtgt cagtgagttt cttagcgatc tttgccattt ttaggaccct cgattttggg
      961 accctttgcg ttgggtccca aaaagggtgc cataaggagt agcttctagc aaatttcagt
     1021 agacttctgt agacgtaaaa aagcccgcaa ggctggttcc atgcgggctt agtagacttc
     1081 agtatacttc aaacaactaa aaagtggtgg agctggcggg agttgaaccc gcgtccgaaa
     1141 ttcctacatt ccttctggta ggtagcaaaa acaacaaatt acaataaaaa caaagtgtta
     1201 tcttgtgatg agtggtgagg aaaaggcttg attgccattc gctgccgcca acttgccgcc
     1261 attttttggc gaccagttca ggccgttgag tgggttttta gtaatggcgt cttccagatg
     1321 gtcgggcgca aagtgggcgt agatcatggt cattttgatg tcagcatgac cgaggatatc
     1381 acgcagcacc agtatattgc cgccgttcat catgaaatgg ctggcgaaag tgtggcgcag
     1441 tacgtgggta cattgcccat ctggaagctg aattcccgtc cggttaatgg cgcgctcaaa
     1501 ggtttttcgg cagggagaaa acagcttgcc gcttttacgt gggatctcat catacagttc
     1561 acggctgatg ggaacggttc ggtttttctt gcctttggta cgggtgtagg tgatgcggta
     1621 aggcgtgact tgctggcctg atagcccttc cgcttcgctc cagcgcgcgc ccgttgccag
     1681 acatatcttt gtgactaaca acagatgcgg gttagcagat tcggcgcacg catccagcac
     1741 gcgctttatc tcattgggag ccagaaacgc cagttcctgt tgagctatct tgaatgttgg
     1801 caagccggat agcgggttgg gtgcatccca gtggcccagc tttttcagtg tgccaaatac
     1861 ggcggacagg ttgcgttgtt ccagattgac cgtgcgtggt ttaactacag ccatagggat
     1921 gccgctagcg tcagtcatct gcccggctaa ccgcagttcg cggtaatgcg cgaaatcggc
     1981 ggcgctcagt tctctggctt tggggttgcc caacccggcg cagatgatat caagtttcgc
     2041 catcatcctt ttgggatcgg ccagtgtgcg gccgtaaaga gaaaaccaca gatcgataat
     2101 ctcccgcagg ctgcggttat ccgctttttc gccaagccag ggcttgtttt cactctcttc
     2161 catcgtgaag cgctcaaatg ccaacgcttc acctttggtg gcaaactgct tgcgtacccg
     2221 cttgccttca cgcccgaatg ggtagcactc acacaaccat ttccctgatg ccaacttacg
     2281 aacagccata cacccccctg taaactgagg gatgcatatt tactgtgtat aaaaacagtc
     2341 atcaatgtat ggatgttgtg agagcaaaca aatggcaaaa ggtggttaga ggtaacggta
     2401 agactgaggg ggggatgttt tattatttct ttaaggtaaa agaataaatt ttagttaatc
     2461 aaaagctaca gccagctcca taaaatcaat ataatttttt atggtgtgga agtttttttt
     2521 atttttattc cacaagccat aaatttggaa atttattttc tcttgattgt catgtttttg
     2581 ttgtgagtca tatattgtga taagttgttt tttatcctcc aaattaggag agttgattaa
     2641 ttcacagcgt gccatttgaa actctacttg ttcgattaat ttacagaagg ttaaatttat
     2701 tacttcctta gtcgtagggt ttctttgcga aacataatcg tttacgatta gtttgtcgac
     2761 cccagtgttg ctagggcttg aatccattgt tatgttgaca gtattttttg ttaaataaaa
     2821 tagtttatca tttcctaata aaaactccgc ccatggtcct tttcttgatt ttattcctgt
     2881 taatacattg catgcggatt tatccatctc atttagagaa agcattgtta acaataaaat
     2941 gtaatctatg ttttttgatt tttgagattt tattatatcg caaaatctat ctattgtttt
     3001 aatagagtct cgtatgttca tttttatcgc atccataatc gatgcgcagt tatttgtcat
     3061 atcttccata tcgtttatgg ggaatagagt tttatgtatt tcctcaaaat catctttaat
     3121 tctgtctcgt attaatgtac tgacaagtgt cttaatgtct ggagcatgaa gggaaaaacg
     3181 tctgtgaaag aatctgctta aatatagatt ggcgtcgaaa ccttcaccat aaacattttt
     3241 tatagaatgt tgtaattgct cggtgtctgt tgcgataaca aaaataaaat tatcaacgct
     3301 gaatatatgc ttcactattt caagcagtga gatagcatag tctggtctgc atctatcaag
     3361 ttcatcgata aaaataaaga caggggcttc ataaccttta ttaaatgcaa ggtcagacca
     3421 aaaaccaagt tcttttttca atgttgcaat tgactttaac tttttctggt gctgttcgag
     3481 cattagtttg gatgctgttt gagctatttt tgcaatgtcg tcaatgccaa catattgttt
     3541 tattactgca gaagtaatct ctggaatgac acctttagtg aaccttccta ttgcttccgc
     3601 tgcacgtatt agttttgcat cgatcctgcc ggaatatgtt tcaatttggt tgattaaaga
     3661 agaaaaaagg gtaagaaatg catcatcaga gaagtcctgt ttccatgcat caatatatat
     3721 gcaagggtgt ttttctttta ttgatgtgta tagccttttt agaaaataag tcttccctgc
     3781 accccattcc gcatttagat ttaccactgt attttttgac ttgcgttctg ataaataaaa
     3841 atataaatat tctgcatatt ttcttctatc aagggtgtct ggtggaagag tttctttttc
     3901 accatctaac tcaatgtcta cttcctcttc ccagttaaag tttaattcct tgcctaaaac
     3961 cattttttta ttccttgcta ttattactta ttcatctgtt tttctgttgt cactatcttt
     4021 tttattttta gatgtgaagg tttccttgat gctttcaata attgacaatg cattgggcgg
     4081 tgattctgtt tttgacgaga atgctgaatc accagacata ttccaatctt taaatacttt
     4141 tattgcatca tcttttgttg ctgtcccccc gaatatttgc aagaatattt gaccaaacat
     4201 taacgcatgt tgcctatctt tccttcttat cgactcatga gtatattttc tggcattact
     4261 gaagcaaata tatgataacc acgataacaa tcctattgct aataatcctc gcgagaatat
     4321 ataaaatatg acgatagcgc tgttttcttt gttttctatt atcttttcaa ttccagttga
     4381 aaatgtacag aatgcggcta tcactgcaat tatacatgcc aatgccccat agaatgccca
     4441 attatttgac atgtcgatga agaatctgtc atcagaattc agcttttcct tgacggataa
     4501 aacatactct ggaatcttat catcaattct gttttgttgt gatttctcta ttagttcttt
     4561 attttctctc tctagagttg atattctttc ttcttggctg ctgatggtgt caatgtggcc
     4621 cctcattttt gaaaaaagca cattcctttc tgacttagca atcgataagt cattttcaac
     4681 atcactaatt tttaatttaa gttttttatt ttcctcttca agtgaggggt ggattttttc
     4741 tataaaaatt tctttttctt ttcctttttt aaaaagatag ctaactattt ctttgttaat
     4801 cgaatcatca cattcttcta caactaactc tattgcttca tggtaataat catcactgat
     4861 tacgcctttt tcatgatagt attttagtaa ttcaattaat tttttttgtg agatttcttt
     4921 ttccatgata ataatcttaa gttaaatttt ctatttgagt tttaattaat gcagatacgc
     4981 caatatctcc cagcccacaa tcaaactccg ccccagtccc gctaacgcgc actttcccta
     5041 ctggtatacg ggtcagatct ctgatgctgg ttcggccttc aatttcaacc agccacttac
     5101 catcaaccac ctcgtcaaac tggcgatcgg caatgtaggt tatgtctcca tccagaatgg
     5161 caaccgggtc tttcagccca tcggacagaa aagccttatc aaacatatag tagtttgaat
     5221 cgtagagttt tccatcaatc agcttttgcc ttggtatagc gatcacgtca tttctggcgt
     5281 cgttgaatct tggcccttca cctgtcgtta gccattgagc agaaacacca gtttcgattg
     5341 tgcattggat aacccattct gctgggaata agtctctcat gtagcgtgta gcgagtgtgc
     5401 tttttgatac gcctaaatgg tcgcaaagcg cctgtctggt agtaaaccca tatgcttcta
     5461 caaggcgttc aataacctta cgccctccgg ttttgaaatc catcaagtac gctctcgcaa
     5521 acaaataagt tgacaggttc ccattgagat cttaatttct ctctcgaagt tcgatatggg
     5581 aatcttcatc ggtaaccacg gctcaccaca agccaatagg gaatgttgca ttatgagacc
     5641 tcaaatatca atcaccctgg ccgtgccgtc tgtctcgatt gagaaataca gcgagctgac
     5701 cggcctttct atcgacacca tcaacgacat gctggctgat ggccgcttaa ctcgtcaccg
     5761 cctgcgcaaa gataaaaagc gtgaaaaggt gatgatcaac attgccgcta tgacggttga
     5821 tgcgctcgca gattgtgata tttcgctcaa ttagttcgat attgagattt ttggagttca
     5881 cgaaccatgt ttgattacca gatcgctaaa cagacgcact ttgatgaagc ctgccggtcc
     5941 ttttcacttt gtcacaacct ggcggagctg gcacgcacgg cggggatgaa tcagcaaatc
     6001 ctacgtaaca agctgaaccc agaccagccc cacaagctga cttgtgaaga actgctgacg
     6061 ctgaccgaca tcaccgagga tgccacgctg atcgatgggc ttttggcgca actgaactgt
     6121 ctgccagcgg tgccagtgaa tgaggccaga gcagagcggc ttaccgccta tgtgctgcaa
     6181 gccactgccg cagtggggaa ggtggccgcc gagagcgtat cagatgagcg tatgacgcag
     6241 acgcgacgcc ataacctaat gagcaccatc agcgacgggg tgcgttacct gtcgctgatt
     6301 ggcatgacgg tgcagtctcg cattcaggct aacccggcga tggcgtcaac gctggatgct
     6361 ctgagcgggt taggcgcatc gctgacaatc ggataataac aacaccaggg aaaccacgcg
     6421 ccgggcgtgg tgaaacatcc cggcacctat ttgcaaccgt ctatctgtgg gcggttacca
     6481 ataggaggaa caatgcaaaa gccgatctca attgcccctt tcctgcggaa taaccagacc
     6541 ggggcatcgc ttcccgtaga ggtgcgtcat ggcaagggca agcagggcat cattattcgg
     6601 ccagatggcc gccgctggaa cccaccgaaa ggggcgttta accggtaatc aggagggaat
     6661 atgtctcaat ctgtcgatca tcagaaatgg atacagcgtt gccgggatat cgtgtttaaa
     6721 ggtgaatccc gcgctcagtt attttgggag cgggctgcac tggatacccg tgaaattatc
     6781 ctgttttctg caaagccaaa gctgaaatcg cgccatgtca attactcatg gcatcagttt
     6841 acggcggaag agcgcgccgc tatctggagc gcaattaagc gcatccggtc tatttgcgat
     6901 gaaaccgcgc tatttggccc ggatgatttt ctgagaacca gtaatcaaaa cggcacaagc
     6961 aatacgccga acccgtcacc gattcattaa ttaatccata gcaacgaata aatgcccttt
     7021 atcgggcagg gattcgtatt acctgaaaaa aggaaaccgt aatgattgca accaaattaa
     7081 ggcccatgaa tgccgccgct gatggcgcac tgatcgaact gctgaataaa gcccgcttgg
     7141 aggagcgcaa agaccagcat ttttccttct cactgcgcct tgctgcgctg gctgtccgcg
     7201 ttcaacaacg tgacctctcc gccgccgaag tggtggagct gatccgccag gaatcggaac
     7261 gttttgagca ttccgctcag gagcttatct aatggatatg ccacaaaacc ccgcttataa
     7321 ccgtgtggat atcaacgggt gttatgcgat tgcgaaagtg ggttatgact ttgcgctggg
     7381 ggaagtgcaa tgcgataacc gggacggcgc acagccttat ctgtccaccc tcgcggtata
     7441 ccaaacgccg attacgctgg tgaatgattt tgtgcatcgg tcgctctgcg ctgaaattcg
     7501 gcgtggaacg gttactgaca tcaccaccat gttgaccgaa gcagagcgcc tttccctgct
     7561 gtgcctgaat gcctttgaac agttagaaaa tactggaacc gggttaagtg aatgaacccg
     7621 gaacacaatg gcgcttatca cgtcgtcaat cagtggcgac gtgagcagtt cacccgcaac
     7681 gaaccggacg gcttaaccta tgttgagcgc agtctatggc accttaaccc gctggatcac
     7741 cagtggcgtc agcagtacct ggccggaatg ccggattatc tggcgaagta tttcggccag
     7801 cgttatgaaa agctgtttac atcagatgag cacaagggcc gccgccgggc caatacgttt
     7861 ttactccgta ccctggggaa aagtgtattg ccacgcctgc gcaccgttac cgaacgatac
     7921 cagacgcaac aacgtgcggc gggagatctg ccgttcccgt tctacgatga tctggaaaag
     7981 ctgccggttt atgaccgtga taacatccgc gccctgtcac agcaggtggc cgactttatg
     8041 gccgcatcgt tgcgtgatta cacagaaaac cgcatcagga acaccgggga aataactgac
     8101 aggtacatca ccctgctgtc attccgtcac cttggtctgc tgaccttaca ggcaggaact
     8161 cagccgccct actgggcgca attcaccaaa ggccgccacc cgttatccac tgaaaaagct
     8221 gaatccggct tgctacgcat gatgtcacca gagtggtggc gggcgcgtct aaagcgccgc
     8281 cgtgatatcc agcgggagca tatggcgatc gctgtcggcc aggtgcaaaa agcggcatca
     8341 ccctatgttt cccgctccac gctggatgaa tggaaagagc agaagcggcg caaccgggag
     8401 tttttcaagg cgtttgaact ggaggacgaa gagggaaacc gcgtctctct ggacgacaaa
     8461 gttaacgcca gcaatgctaa cccggcgatc cgccgctgtg agctgatggt gagaatgcgc
     8521 ggctttgagg atttggcgca ggaaatgggc tgcgcagggg agttttacac catcactgca
     8581 ccgtcacggt atcacgctgt acacagcggt ggcgggtttg ttgagcagtg gagcggggcc
     8641 agtccacgcg acacacagaa atacctgtgt ggtgtgtggg cgcgcatccg ggcggaactg
     8701 tcacgcgaag agattagcgt gtttggcttc cgggtcgtcg agccacatca tgacggcacg
     8761 ccgcactggc atttattgct attcatgcgc ccggagcaca tcgaacaagt gcgtgacatt
     8821 atggcgtatc acgcccgccg ggaagatgcc gatgagctga acagcgaaaa ggcgcaaaaa
     8881 gcccgcttcc actatgaacc gattgacccg gaaaaaggca gtgctacggg ttatatcgcc
     8941 aagtacatca gcaagaatat cgatggttac gcactggatg gtgaggccga cgaagaaacc
     9001 ggggaaaacc tgcgtgatat ggcgaaggcg gtatcagcct gggcatcacg ctggcgtatc
     9061 cggcagtttc agcaaatcgg cggcgcgccg gtgacggttt accgcgagtt gcgtcgcctg
     9121 ggtgataagc aactggataa cgcggcgatg gatgcggtac tggcggcggc agatgtaggc
     9181 gactgggcgg catacacaca ggcacagggc gggccgttag tctcgcgtga tgcgttggtg
     9241 gtgcgcctgt cctatgaagt gacagagcgc gccaaccagt acgcggagga tgtgcaaaag
     9301 gttcagggtg tgtactcgcc attactgggg gagcgctccg cgatcgtcac ccgaacggtg
     9361 caatggaaga ttgtcccgaa acaggccgcc gcgtcagcgg gggccggggt ttctggcggc
     9421 tccgccgccg cttggagttc tgtcaataac tgtacgccgc gcctacggcg acgattatcg
     9481 gaactgttgc acttgagagg ttttccgcct gatcctgagc tggttgatgt gctcatacgg
     9541 ggcggcaatc tggccatgag tgagggcagg gcactgaaaa tggttaacgg caggctggag
     9601 gaggtgcgcc agacgggaga ttgcgaactg tggccggggt ggaactgggg ttagcgtgat
     9661 gtctataatg gttgaatagc ccgcaattgt tgggcggcta aataatcatg tattacatat
     9721 cttgccttga gattatagtt tttacttata gtgctagtat aaaaggaaac gatgaaatga
     9781 aaaacaattc tgctatttct agaattgaga aaattattta cagaataaaa gatggtgcat
     9841 ttaatgatag tgatgtggaa cttttttttg ttactttgcg tgagcttaaa aatgctacga
     9901 gaaatatagt tgaaattggt agttttgttg ctcataacca ttgtcgagat aaagggttga
     9961 ttagcgatta tattttaagg aactatcttt tcctaagtgt tagggtcggg atggataatt
    10021 tcttggctaa ttcttccaga ggtgaatttc ctaagtattt tccggtttta ataaaattgc
    10081 agctaaagat gtttgataat gctcatttca agaaaaaatt tggtttaaaa ggtggggaga
    10141 ttaacagaat aagatattgt cttaacgata agggatcata tttaattgat ggtgatgttt
    10201 gtcgtctaaa tagaaatgta ggtaaaaaag agcttttaat aataaatgaa gtgttatctt
    10261 tattgaattg ttcagatggc ataaatttcg atgatctgat aattgagata aagaaattac
    10321 tctcaagtga gattaaaggt tttgatgtga aaattattga tgaggaaaag ctttccattt
    10381 tttgtgttat tgtgtgtctg ttgaataatg tgagtttttt attactcaat gacgtgaggg
    10441 cagagacgat aatttcaatt gaaagagatc agacggttgg tgtttgtgtt aaatattctt
    10501 tgatggtgcc tggagtagaa ggggatacag ttcaaatgat taatccggta ttttattctc
    10561 gttatgataa gaaggatgtt tttaatcatg acataacgat gggggatatt gaaagtggta
    10621 atttacagtt ttctaaaagc catggcagaa tagttaaaat caatagtgaa atgacgattg
    10681 tttgaatttg atgttaatgg ttttataagg aaagtggccg tacctacttt ctaaaaatga
    10741 ttcctcgcgt catggattgc ctgatttagt ggttttgggc ttgtatcatt caggggtatt
    10801 aaagccacta cattatggca gggatgatat tgggaataag gctcaatgtc cgttggtaga
    10861 cgacaaaaac ggaaccgcta atagtttgtt agcttcgtat ttatattttg aaatgttttg
    10921 ttacgtgaga gctattagct gtaggagatg accaatggat agggagtttg aacagtcact
    10981 gattgtcgaa cggattgcct ttctggccaa aaatgccggg atggagggta atgatgagcg
    11041 tgacaggcaa attgcgctga tctggatagc agaactggcg gggcaattga tgacgttaca
    11101 agccgcgtaa tgcggcttag gcggcagcgg ttttcagcag gtctaatgcc atttgccgct
    11161 gttcgggttt caggttattc aacaccgttt gcagcaactg atcgccggtt tttgagctgg
    11221 ggctgagtgt gtgggaaaat gtcagattca tcacaaaggt gtagccgcat tccacatctg
    11281 aacaggcgca gtaaatatct gcaatctgtc tgtgtttgcg gtttgtcttg cggataacgg
    11341 cttttgcgcc gcactccggg cattcaatct ttaatacccg catattccat gctccggcct
    11401 ctaaaacatg gctaaatttt aacgttttat gtcccattac gcaccctgaa tcgttgtatc
    11461 atcggcaaaa tcgaagatta aatgcagatt ttgcgatatt tcagggtctt tattgatgga
    11521 agccataaaa cggcgctgaa ttgggatcac ttcgtctttg cggtacgtgt tccgcgcctt
    11581 ttccgggtcg cccagcccgg cggcgttttg cgggatgatg ccgcacagcc cggccgggaa
    11641 acggtgcgca ttgagtacat cctgagcgct gatgtttttc acgttggcga attcgtcctt
    11701 ggcgctgata tcccccatct ggataaattg caccccctct ttgtcgccgt tcgggatgtt
    11761 cactaaaata gtggagaagt tgccgatccc cttgctactg gctaactggc gctcgatttc
    11821 ctcttcgatc tcgtcggtca tgttcgggtc gctggtgtag aggataccgc cggtgtgtgc
    11881 gccgttgtgg tagtagcggc gccgaaaaat caccgcttca ctgttcagca gggctgagtg
    11941 aataccgcca atgtagtccg gcaggccgta aatctgctgt tgcgggtcgt acatcttgat
    12001 gaaaatcacg tcttccggcg ggtaaaccag cggttcccct ttctgcaata ccacaaattc
    12061 cccggtttta cggatgcggg tatacagtgc ggggagaggc gtcaaggcga tcacctctcc
    12121 ccagccattg cgtactttca ggatggcgat atcaccaaag gtcaggtagt cgaacgcggc
    12181 ggccagcatg tcatcgtgag acaggccacc accctgataa tccgacgcta ccatgttacg
    12241 gcgggcatag aggatgccgc cgtgttggcc gttcaggttg accagttgag ccagggcgag
    12301 ccggtctatc ggcagggtgt agtgattaaa ttcattgtca taccacacat cgcggtaatc
    12361 ggtgccggtg gttaataccg gttccggttt gccgaaggtg ataatactca tctttttacg
    12421 cggggcgttt tgcgccttct ggcggcggtg tgatgtcctt ttcatgctgc ttttttcagt
    12481 ctccatcggg attggggttt gttctcatag ttcagcggtt cgttatccag cgcgtgcgcg
    12541 atagcgaaga aggcttccgc atggccggtt tccgcgctgc ggtcggcgat gaacgtcatg
    12601 gcgttgccgc tggccgtggt ggtgcgtcgt atcgccataa atgacgccgg gatagccttt
    12661 tcatcctgat cccactcaat gcgctgactt tccaccacgt cggccgcttt catcaccagg
    12721 cggtttttgg tttccacgcc gtagcggata gccgttgcct gcctcatggc aaagtgctgg
    12781 atgttctcaa acaccccggc accgatgccg gtcacatcaa tgccgatata ggtaaagtgg
    12841 taacgctgga atagcttttt gatctggttg gcctgataac gaaagttcat gccgtgccag
    12901 ttgacgacca gcaaaacgcg gaatttctcg ccctcgtaaa tgggcggggc gacaatcaca
    12961 aacgtggaca ggtcgccgga gcgagccggg tcgtagccgc cccagacctc gcggttgccg
    13021 aatgggcgcg gcgcggttgg gtcgtgatcc tgccaggtgg ccgggtctac gccgcagcgc
    13081 tccaggtcgt caaagctgaa caccgcgtct ttgttgtcca caaacacgca catatacagc
    13141 atgttgaacg tgtccacgtt gtagcggttg cgcagttttt ccaggctggc cagattgaag
    13201 ccgccgcgga tcgcgtcttc catcgtgata acgtaccgcc attgaccatc cgggcagagc
    13261 agcccgccgt cgcgcagttc gtcaaagccg gggaagttaa ccccggcgcg tttcttgtta
    13321 ccgcgtttcc attcctcgcc tgtccagaac gggtaagcct ggtgcgtttt ggcgctgggg
    13381 gtggaaaagt aagtggtacg ccatttgtca tgggtggcca ttgcgctggc cacttcgtta
    13441 aggcgggcaa agttcggcac ccaaaagtat tcatcgcagt acaggtgccc gctgtaggat
    13501 tgcgcagtgt tcttgttggt ggataaaaag cgcagttcgg ccccgttgct caggcggatc
    13561 gggttgccgg tcagggtgat atcaaaatac tgctgcgcaa tgttgacgat gtacgagcgg
    13621 aaaacctctg cctgggcgcg actcgctgac aggaagattt gcggctcacc ggtcagcacc
    13681 gcattttcaa aggcttcaaa ggcaaaatac caggtggctc caatctggcg gcttttgagg
    13741 atattacgca cctgctggcc aatattaagg cgtaggtgtt tttgatagcc aaacaggtgt
    13801 tcatcagccc aggcgtcaaa gtcttctttg gtcaggctgg aaatgtcatt tttgcggtac
    13861 tggcgctttt tggacgggcg ttcatcgtca tcattcccgc gtgggccggg cgtgttaccg
    13921 tgaccggcgg cggcgagttt ttctttgtgc ttgttgcttt gcgcccgcag tttgacggcg
    13981 tgggcgatca gcatgtccat ttcctgcaat tccagctcgg tctttttatc ccgaccggcc
    14041 agcaactgat aacggcgctc tatcgcctct tcggtgcttt cggcgctgag taaatccgcc
    14101 cagccgaatt tttgcgccca atagtaaata atccgcgcat ttggcagatt taaatcagcg
    14161 gcaatttctt tcggtgtggc tctttttaaa tagagaagcc gcgcaacacc gattaattca
    14221 tcagaatatt tagccatgcc ggtattatgc ggcgcgattt ttattttatg accgatgttt
    14281 atttcgctgt gttcgtcaaa gcgtcgttat ccgaatagag acgaataaag ccggtcgctg
    14341 cccgtttctt attccgtaat aatgccgttg tccgacagaa gcggagtatg taaatgtctc
    14401 agttaatgac taactggatt tgtatcgcca cggaggggga aacggttgat aagcgggtaa
    14461 tggaaagaca gtggttaatt gatgccgctg aaacttatga cccgctattc tatgctgccc
    14521 taatttggcc ggagcatgaa gaatggttcg gcaatatggg cgaagtgctg gcattaaaaa
    14581 ccgaaaccgg tgatgacggg ctgttgcggt tattcgctca gttacgccct aaccaccagt
    14641 tattacaggc taaccgggat ggtcagttgc tgttttgctc ggtggagcta acgccagacg
    14701 ggaattttcg tggtacggga aaaacctatc ttgaagggct gggcgtgacc aataccccag
    14761 ccagcgtggg aaccacgcgg ctacgtttca gtagcaaaaa gcgcggccgt ttattcggtg
    14821 cattaaagcc gctggttatt gatgaagtaa aagaaatcaa agggaatagc atggcaagta
    14881 aatcatggca tagcctgttc ggtattaagc cgaaggcatt cgccgagggt gaaggcgaaa
    14941 ataacgatgc aggcggtggc gataaattgc aggcactggc ggaagcgctg gccgaactgg
    15001 agtcccgcgt aactgcgctg gaaagtcagc aaagccagac caccgatgca gtggaagctg
    15061 ttcaggacga tatggacacg gtaaaagagg tggtggatac cgaagatttc gccacgctgc
    15121 gtaataacct gccgaagatt ttgagtaatt tcggcaagct ggatcgctct attaccaaat
    15181 tgccacagcg tcaggttggc aataaaccca aagggtttaa tttcctgtaa ttccatttat
    15241 tgggtgatac ctcttttttt atctcgatat cgagaggacg cattatgttt ttaaatcagc
    15301 gggcgcgtga atatctgagc gcctacagtg tcggtctggc gcaggaatat ggggtagcgg
    15361 ataccgcccg ttatttcgcg ctgaccgacc cgaaagaaac ccagcttcgt gccgccctgc
    15421 tggagcgcgt ggatttcatg tccatgatta acgttctgga tgtggatcag ctctccgggc
    15481 aggtggtgtc cgtaggcagt tccgcgctgc ataccggtcg taaggaaggg ggccgcttta
    15541 tccgtcaggt cggcgtggat ggcaatgact ataagctggt cgagacggat tcctgcgcgg
    15601 cactgccctg ggatctgctg tcggtgtggg ccaatgcggg tggtgaggat gagtttttcc
    15661 aactggtaca ggcgttttcg aatgaagcgt ttgcgctgga tatgctgcgc atcggcttta
    15721 acggtaccca cgttgccaaa agtaccgacc cgaaagaaaa cccgaacggc gaagacgtca
    15781 acattggctg gcatcagcgc atgaagggtt tcaaagacgg gcagcaaatt atcaccgatc
    15841 gggtggtgct ggacgaaaac ggtgattaca aatcactgga tgcgatggcc tccgatttga
    15901 ttaacgccaa gattccccag caataccgca atgacccgcg tctggtggtg ttggtcgggg
    15961 cggatttggt cgccgccgaa cagtatcgcc tgttccagaa ggccgaccga cctaccgaga
    16021 agatcgccgc ccagatgctg gacagtacca ttgccgggcg tccggcgatt gtgccgccgt
    16081 ttatgccggg caagcgtatg accgtcacca cgctgtcgaa cctacatatc tacacccagc
    16141 gtaatacccg gcagcgtaaa gctgaattcg tggaagaccg caaacagttt gaaaacaaat
    16201 atttgcgtaa cgaagggtac gccgtggaat acccggagct gtacgcgtct attgacgaaa
    16261 gcgccgtcac catcggtacc gtggccgagc ctgcggaaaa ggaaaaagcg taacgcatgg
    16321 ccctgtcacc cgcgcaacgt cataacgccc ggatggtcgc cgagcagcag ttatcccggt
    16381 gccaggcggt atccggcgat cacagcttgc atgtgcaact ccgtgcgctg gaaaacgacg
    16441 tggcacggct gcgcagtcag cccacgttac gcgacaggat agagatgaaa cgccgggagt
    16501 tgctgccgcg ctggttgcca acggtacagc gctatctgga cagcggcgag gtgtatcaaa
    16561 actcggtgtt cgcgcattgc gtggtgtggc tgtttgatgt ggaagagttt gatcaggggc
    16621 tggcgtgggc ggatatcgct atcgcgcagg gacagtgcac ccctgacaac atccggcgca
    16681 cgtttgcggc gtttgttgcc gatacggtgc tggcatgggc gcagcagacg gcggacatgg
    16741 ggcagagtgt ggagccgtat ttttcccgca cgtttaagaa cgtggcagaa cactggcggc
    16801 tgcatgagga gatcaccgcc aagtggttca agttcgccgg gctgttactg ctgcgtgatg
    16861 agcaggggca accacgggcg acagcggcgg cggatatcga cacgctgacg gcggcggatg
    16921 ccctgttaca tcaggccgag cagttttacc gccaggttgg tgtgggaact atgcgccgca
    16981 atattgccgc ccgcattcgg gcgctgcaaa aggaataacc gactaccgca agccgggcgg
    17041 gcgcggctga ggcaatgcac cgggggtgcg atgtgccgtg gaagccggtc agcccgcctt
    17101 tttacggggg atgcatgttc agtggaacac cggttgatta tcaggatgaa caactgacca
    17161 acaatggatt ttggccagac ctgaacgtca gggattttca gtcacagcgc accattcccg
    17221 ctgatctggc tgccgatacc gttgcacagg cgttactggc cgcagtgggc gaggtcaacg
    17281 ccgatctggc tgaggtggag gcccgcagcc gggcgaaggg gtttacgcgg gcgcaggatg
    17341 tgccgggtgt cagcctgaaa ggccagaacg tgctgtgtgc gcagtatcaa aaagcggtgt
    17401 ttgccagggc aaaagccgat ttgctgggcg agtttgccac cattggccgc cgcgagtctc
    17461 atccgggaca ggagggggac gacacacgca agggattgct gggggaagcg gcgatggtga
    17521 tccgtcgcat gaaagggctg aaacgggcaa cggtgcggat ggtatgagca agctggatga
    17581 cctgaccacc tttgtttcga cgcatctgcc gccccgtgtg atgcaggggt ttgacagctt
    17641 catggatgaa gtgagcttta ttcccgcccg ccgtgacctg ggcgaagacc agtatcaact
    17701 ggcggtaatg aagtttgatg ccgtgttgag ctgggagcgc tggccatacc gggtgtgtga
    17761 cccgcgcaac ctgtgcgctc tgttactggt ctggcaggag gggcaggacg atgtgccgta
    17821 tatggatgcc gggctggata tggagttgcc gacactggat gtggacgtgc gcgatcagga
    17881 tagcgcgatt gttgtggtgt cgctgcaact ggcggaatca ttggcgattg tggtcgatga
    17941 caacgggatc attccgtttg atggtcggcg ctggcgtctg accagcccgg aaatctggca
    18001 ggccacatcc gggcatctgt tcggtgcagg cgacgacggg gcggaggtcg gggcgtcatg
    18061 atcgtacatg gtgagctgag ccagtcacaa ctggccgaac tacgcaccgc attacaacgg
    18121 ctgacgctgc cgcccaaaaa acgccagcgt ttactgtggc ggctggcgaa atacggggtg
    18181 attgcggcgg caaaacggaa cgtccgggcg cagcaggcac cggacggcag cgcctgggca
    18241 gcacgacgtg gccaccgccg tggcaggatg ctgcgcaatc tgcccaacct gttgcatatc
    18301 cgcgaaatgc cagagattca ggcggtacgg atttatctac aaggcggcgg gtatcgcaac
    18361 ggaaaaacgc cggtaccggc gggcgtggtc ggctacagcc agcaaaacgg catgagtgta
    18421 tccgtcaagc gttcacaggt cggcaatgga cgccctgagc cgggacggat ggccacgcga
    18481 cgacaggcac gcaagctgcg ggcgctgggg taccgggtaa aacgcggggc gcgatggaga
    18541 aagccgcctt accgggagat tgaggaaaca ctgagctttg cgcaggcggg attactcatc
    18601 cgtaagttga gcggcaaggc ggcaaaaacc gcctggacag tggatgttcc tgcccggcca
    18661 tttttgggta tgaacgatgc ggagtttaca aaagcgctgg cacgacagct acaaggcatt
    18721 ggctttggct gggatgtgaa agcgcaggat atcaaggggt aagcatgagt tggccaacgg
    18781 ttcaggttaa ccaggtaaac cagctacaag gcgaaaccag cgagattgag cgcgtggtgc
    18841 tctttatcgg tgagggggcg gtcgatgcgg tgaaaaccgt gccggtcaat acccaaagcg
    18901 atctggatca ggtgctgggg gcggcggatt cggtactgaa acgcgacgtc agcgctgcga
    18961 tggtcaatgc ggggcagaat tggagcgcct ttgtctgtct gctgccgcca aaaggcgact
    19021 gggtgagcgc ggttagtgcc gcccaacagg tcgccagtgt tgaaggggtc gtggtgtccc
    19081 tgcctgccac caaaggcatt atcgcccagg catccagcct gcgatccacg ctggtgtcag
    19141 cattcgggcg ctgggtgtgg tttctgctgg cggttgacgg cccgaaagag ggtgagggct
    19201 gggataagta tttacagagc ctgagtaatt tacagaacgg cgcagcggca ccggcagtgc
    19261 aactggtacc aaggctgtgg ggcaatgagc cgggcgtgct ggctggccgc ttgtgtaacc
    19321 gtgcggtgac gattgccgac agcccggcgc gggttcaaac cggtgccttg ctggcgatgg
    19381 ggcgcacgga tttaccggtg gacggtaccg gcgtgacgtt ggatctggcg atgttgcagg
    19441 cgctggagaa acagcgatac agcgtgccga tgtggtatcc cgactatgac ggctactact
    19501 ggtcagatgg gcgcaccctg gacgtggaag ggggcgacta tcaggccatt gaaaacctgc
    19561 gcgtcgtgga caaggtggcg cggcgcatcc ggttgcaggc gattgccaaa attgccgatc
    19621 gcagcctgaa cagtacgccg ggcagtatcg cggcgcatca ggggtacttt gcaaaaacgt
    19681 tgcgtgatat gtcccgcagc acccaaatca atggcatcac ctttccgggg gaagtgaagc
    19741 cgccgaagga tggggatgtg gtcattgcgt ggcgctctaa aacggcggtg gaaatttatc
    19801 tggttgtccg tacttacgaa tgcccgaaag ggatcacggt cagtctggtg ctggatatgt
    19861 cgctggaggg tagcgcatga caaaacggat ttcgggccag tcgtttgatt tcaacatgga
    19921 cggcgcactg gttcacgcgg aaaaagtctc gctgagtatc acggataaca ccgccgccgc
    19981 gcagacgcag ggcatccccg atggctgggt ggccggtgac gtcgccgccg aaggtgaaat
    20041 ggagctaagt accaagagcc tggcggtggt gacggcgaaa gccagcagtg ccgggtcatg
    20101 gcggggtatt gagccggtgg acttgatgtg gtacgccaag gcgggcagcg aggaaatgaa
    20161 ggtggaagcc ttcggttgca agctgatcct gagtgacatt ctggacgttg acccgaaggg
    20221 cggcagcgtg atgtcacaca agattaagtt tgtggtcacc agcccggatt ttgtgcgcat
    20281 caacggtatc ccctatctgg aatcggaact gacggaaaag ctgatcggct aaggacagtc
    20341 atgcaggaat atgaaaagaa cgcgctggga ttactggtgc ttggtgcgct gattgcgctg
    20401 ggtaagttgc tggccagtga tgaaaaaatc acgccgcgcc tgtttttcgg ccggatgatt
    20461 ttagggtcgg ccacctcaat ggccgccggg gcggcgttgc tgtgggtgcc gggattgtcg
    20521 ccgatggcgg tcaccgggct gggtgcggca ctgggggtgg ccgggcatca ggcggttgaa
    20581 atctggctgc gccgccgcgg cagtggtttg ctgaaaggga gtgacgcaaa agatgacgtt
    20641 aagtgaaaaa cagcagttat ttacccaact ggtcgcacag ctgatccagt gggcgggaga
    20701 gcgggggtat cgcctgacgt tcggcgaggc ctaccgcacg ccggaacagg caaaactgaa
    20761 tgcccgcagc gggtcaggca tcgccaacag tttgcatacg caacgcctgg ccgtggatct
    20821 gaatctgttt atcaatggtg aataccagac ccggacagaa gcctatttgc cgctcggtga
    20881 atactgggaa tcgctgggtg ggtgctgggg cgggcgcttt acctcacgcc cggacggcaa
    20941 ccattttagc ctggcacaca acggggtgcg ctgatggatg ggctatggcg ggttgtggcg
    21001 ggattgacgg tggcctttgc cgctggctgg caaacggcga gctggcagcg cgacagtatc
    21061 gatctggcgg tgactcgcgc cgctaccgcc gccgctgagc aatcacgcca ggcgttacag
    21121 gcactggcta gccagtccgg cgcggcgctg gaatccaaac tggaggcatt acgcaatgtg
    21181 ccgaataaaa ccgtttaccg ggaaatcgtt aaaccggttt ttactaacgt gtgcctgtct
    21241 gctgagtttg tcagcctgta caacgacgcc gttaataaca ccgaacgtgt cttatcagga
    21301 aagcctgaaa aagaaatgtc cggtcactaa tctgccgcgc ttatcaggtg ccaccggcaa
    21361 tgatgcggcg cagccgttaa tcggttggcc gcaaatttat gcggattgtg ccgcccggca
    21421 taatcagtta attgatgaaa taacccaacg ggaaaacatg caatgagcaa aatcacctta
    21481 tctgtttctg gcaaggaatt gtcgtttgaa ccgaataccg ttgcctataa cggcatgatt
    21541 aatgatatgg caatggataa taaagtggct ccggcggtga cgtatcttcg ccgtattgtc
    21601 gtagccaaag ataaagaaac gctggatgaa ttattaaaac tgccgggcgc agcattgcaa
    21661 attaccgaag cggttaatgc gcaatatgca ccgaagctgg aaatcgaagt aaaaaactaa
    21721 cccagcggct gcgggccatc gaaaataatt ttcttgaaca ggcattaacc ctgcggcggc
    21781 attatttacc ggctgaaaat gatgacgccg ataatctggc ccgcgccgtc tggctggcaa
    21841 atacacactg ggaaaatatg cgtatttccg tggcgaacgg gattgcgctg gcattaaaag
    21901 gcgattcatg aagcaactcg attttacatt aagcctgatt gataagctga cccgcccggt
    21961 aaaacaggcg caggcggcgg tcaccggctt tgcgaaatcg tcgcgggacg ccttttctaa
    22021 aatcgcggtt ggcggtgccg gtcttattgg taccgctatg tctatccagg gggcgcttgg
    22081 cccggcggtt gagatgcacg gcgcaatggt cgaagcgtca gcgcgtggcg tcgatgattc
    22141 ggcgttacag aagattaatg ccaacgcgct gaaattcagc acccagtacg ggcgttcggc
    22201 gctggagtat gtgcaatcga ccgcccggat taatgcggcg gtcggcaccc tgaccaaaga
    22261 ggatttgccg ggggtggtca gggcatccaa tgtgatggcg gcagcgctga aagccacggc
    22321 ggacgaatcg tccgaattca tggggcagat gtttgccaac tttcgctctg atgctgaatc
    22381 aatgggtaat gtgcagtttg cggagcaact ggccggcaag gccgcctata tgcgtaatgc
    22441 cttcggtgtt gagctggggg cgattaaaga cctgatggaa ggcgcgcgcg gggtcggtac
    22501 caactatggc attggtatgg atgagcagtt ggccgtgatg ggcgagctac aacgcacatt
    22561 aggtacggaa gcctccagcg cgtatgaagg ctttttgtcc ggggcggtca agggtgccaa
    22621 aaaactgggg ctgtcgtttg aagattccaa cggcaagtta ctgaccatgc cggcgatgct
    22681 ggagaaattg cgcgggaagt acggggcgag cattgagggc aacctgaaag cccagtctga
    22741 tctggatgat gcctttggtg acagtgcggc ggtcattaag cagttatatg gcaatgtcgg
    22801 cgtcttgcag cggcatatca ccgaactggg cagtaatgac ggtatgaagc gggccacgga
    22861 aatggcgcag aagatgtcca gcccctggga acggctgacc gctatctggt acgccattcg
    22921 cgccgcgatg ggggccacgt tgctgccggt gttgtacccg ctgatcaaca agatggcgga
    22981 cggcgggcag gtactggtca ggtggctgaa tatgttcccg aatatcacgc gggtcattgg
    23041 ttattgcgta ctggcggtac tcagtctggc cggtgcaggg gctatcgcca atatcgtgat
    23101 gggtgtttct gtgtttgtgc tcggtggcct gaaagggtta tggaaagggc taaccgccat
    23161 catgaaaatt catgtcggtg ttatctggct gtataacaag gccgtgctgg cgtgggcggc
    23221 gacgatgcgt attttgcgcg gtgtactgct ggccgttcgc atggccagcc tgttaaccgg
    23281 cgtggcgttt aatatcgcgc tgtggccggt gttactgatt atcggtgccg tcgccttgct
    23341 ggtcgccggg tgctatctgc tgatccggca ttgggatggc ataaagaacg ccatcactca
    23401 gaccgacatg tggaaaaccg tcgcggaaaa agtgcagtgg gttgcggaga tatttggtca
    23461 ggcgtggcag gccattgttg atggctggaa tgttgttgtc aatgcgattg gtaatttctc
    23521 cctatccgag acgatgggaa acatggttga tggagtcggg aagttatttt ccggattgtg
    23581 ggacggtatt ctagcgtcgt tcaatgcctc ttaccgctgg attattggaa agctaaatgc
    23641 aattccgggg atcaatattg ccatgcctga atccacaccc cgaccgggcg gtgagggttt
    23701 attaacgggt gggaaaataa aggggattga ttcgggcgga ttgcaacggg atatcagtaa
    23761 cagcaatgcg aagaattata ccgacaacag ccggaaagtc gaaaacctga cgatttatgc
    23821 caataaagga tttaccccgg aacaattaac ggaatgggaa gcactgcggt aatggatgac
    23881 gtgaaatata ttgacctgtt aattacagag cgcgatttca gcctgaatgc agggcgtgag
    23941 ccgatatttt gcaataaccg gatcagtatt ggtcaggatt gcattcacgc cattattgaa
    24001 agcgggctga ccaccaaact ggtagccgag cgcagcccga cgctgcgggc cgatgtgctg
    24061 acgcaaatga ttattctggt ggaagacgat gaacggatta tccccggcac ggtggtgatc
    24121 agcgaagaaa gcccgacccg gctgtgggtg acggcggaaa cctatgattt cgggccgatc
    24181 acggccaggg tggacgtatg acggaaaagc caaaaattga ttatgagcag gtgctgaaag
    24241 aggccgggat gccggtgacg gccgagacgg taacggagca gtttcaggca caagtgacgg
    24301 catccggtct ggtcactaat acatcgcgga tgtcgccgtt ctggcggctg atttcggtca
    24361 tggtgacaac gccggttatc tggctgaaag acgttttgat cagcgtggtg ctggccaata
    24421 tgtatctggc tacggcgtcc ggctcattcc tcaatctgtt tgcctggggt gtcaatctgt
    24481 cgcgcaaggc agccacggcg gcagcgggcg ttatccgttt ctataagtcg gatgctgcgc
    24541 aggcggtggt gatcccggcg ggtacgctta ttcagaccga acgcattaac ggcacggttt
    24601 tcagtgtggc ggtatcggtg gataccgtga ttgccgccgg tctggccagt gctgacgtcc
    24661 cagtgaccgc cacggcagac ggtggggcat tcaatctggc ccccggttat taccggattt
    24721 tgccggtggg ggtagtcggt attgaacggg tggagaatca agacgattgg ctgctgacgc
    24781 ccggcgcaga tgaggaatca gatgatgacc tgcgtgagcg ctgccgcaat cagttcaatc
    24841 tggtggggaa ttaccacacc gacgcggtgt atcgcagcat gattgcagcg gtggccggat
    24901 taagcatcga tcggattttc tttcagcatg acgccccgcg tgggccgggt accgccaatg
    24961 cttatctgtt gctggattcg ggggtggtgt cgcagccctt tatcgatgcg gtgaatgatt
    25021 acatcacggc acaggggcac cacggccacg gcgatgattt gcgctgtatg gcattgccgg
    25081 aaacacagca tgagttaacc gtgacggttt atgtgcgcaa tctggtgaac gtgacagatg
    25141 aggcgttagc cgcgttgcgt agcgggtgcc aggatttagt ccgctgtgcc tttcgggaaa
    25201 acaccgggta tgacgtggca aagacgtggc cctggtcgcg tttctccttt tccacgctgg
    25261 cacaggaatt acacgatgcg tttccgctga tcgcgtcact ggatttttcc ctgggcgata
    25321 ttgtcagtgg gcttaatgtg ccgcgtttgg cctcgctgtc ggtggtgata gccgatgcct
    25381 gattttaagg agcaactggc gggtctgcgg ctgccgtcat ggatggataa gggcgaacct
    25441 gccgccttgc tgaatgccag caaagcctat tggttgcagg tgcatgactg gttgcgctgg
    25501 ccgttgcaac aattggacgt cgatacctgc gcagagccgc tgctgaacgt gctggcatat
    25561 cagcgcgaca tttcgcggct gaaaggggaa gcgctaacgc ttttccgtcg ccgggtgaag
    25621 tacgcctttg tgaatgcgca ggactcgggg agcgtcgcgg ggtttatcgc catttttgag
    25681 cggctgggca ttggtgctgt caccctagcc gagcgtcaac cggggtatga ctgggatgtg
    25741 atcctggtac gtatcaacga tgagcagtta agcggttata acgccctgat gatgagcctg
    25801 gtcaggcagt acggccgcac ctgtcgccgc tatgcgtttg acctctggaa tggggaaacc
    25861 cagtcagtcc agagtgggga gtttgagcac aacgcagaat actaccacgc agtcagcttg
    25921 atgccggccg gaacggtaac ggcgcgtgtt gcgttgcaca ctgtgcgcac atccgcttcg
    25981 acagaatatt attcagccaa cgtgtaagag ggattatggc gcagagtgtg attacccatg
    26041 cgtttgaaac gtggaatgtt cagcgggttt tagacggcac ggcagcccgg cccgatcagg
    26101 tcgtttttgc acgggttccg ggtcaggatg aatcggtgcc ggtagaccga aatgaagggc
    26161 taccgcctgc cgatcagatt cagcataccg ccgccattac ccaggccggt gtcctgaatg
    26221 aaaacgcggt ggtttattcg gtggtgctgg ataccaccgt gggggattgg gattacaact
    26281 ggattggcct gctggacagc aaaacgaata ccgttttgat gattgtgcat gtacgcaccc
    26341 agcagaaact ggcgacccga aacggccagc agggcaacag cctgacccgt aatctcatga
    26401 tgcaatttga tggcgcggcc gctgctacgc aaatcaacgt gacagccgat acctggcaga
    26461 ttgatttttc ggcccgtctg gcagggattg atgagcgtat ccgcattgaa aatatggata
    26521 ggtatggttc atccgcgttt tttggtaatg cgtatcaggt tgtcaaagat ggcaatgcgt
    26581 atgttgtaaa agccggagtg gcgtatgccg ctgggctgcg tgcttggctg tcgagtgatc
    26641 taaaaattac ggtggatgcc ttgccgactc gtgtctttct ggatgtgtgc tggcgtggtg
    26701 aattcacaca ggcatgggcg gttgatagcc agatcgttgt tgccaactcg gcagatcatg
    26761 aaatacgtga tggtgttcag cactatttgc ttcctgtcgc ggatattgat gaaaacggca
    26821 atattaccga ctggcgtaaa caaggaggcc tggcagaaca gaatgcgcag accctctatc
    26881 ttcgtaagga cgataatctg gccgcattac gtgataaaga agccagccga aaaaatttag
    26941 ggttgggtca gcttgcggta atggataccg acacagccag acaaacgctt cgtatcaccc
    27001 aattagaaaa tgaactggta ggtatcccct tgccttatcc cggtgcaaca gcccctgacg
    27061 ggtggctgaa atgtaatggg caatccttca ataaatcgat gtatccccta ttagccgggc
    27121 gttacccgtc gggtttttta cctgatctgc gcggtgaatt tatccggggt tgggatgatg
    27181 gacgaggagt tgatgccggg cgcagtttat tgtctgcaca gacccaaacc gttcaagacc
    27241 ataagcatgt tggcacaatg gtgaacagca atcctctgca aaccggtatg aataccggga
    27301 tcggcttgtt gtcacaatat acgtcaacgc caacagtcgg gtattcaaat gaaatcagca
    27361 gcggcggaac agcagaaggg agtaaagaaa cccggccccg caacgttgca ttcaactaca
    27421 tcgtgagggc tgcctgatgg cgaattattc agtgaatgtt aaagaaacga cgttagataa
    27481 agacggtcac gctatgatgg cggggtggat caccgtcttt catgttgatg ccaaaacgcg
    27541 ggaatatcgc ggggccagct atgaatattt gatggccggg gtaggcattc cggctgacag
    27601 ctatagtgat gcacccgagt taccgccaga aggaaaggcg ttatgccgtg ctgccgatgg
    27661 gctttcgtgg atgagtgtac cggattatcg cggcagggtg gcctatgata cgcaaacccg
    27721 cctcagtact gaaatcaccg tgcctggcca gttgccggaa acgctaacgc tgttagcgcc
    27781 cgtttcggaa tttgatatct ggaatggcaa aaaatgggtg acggatacgg atgcacagca
    27841 tcaggcgtat gtgaatagcg caatgcagga actgaacgag cggtttacta cggccaatac
    27901 ccgcattcag gcgttaagcg atgcggtgga catggaactg gcaaccgagg aagaaaaggc
    27961 gttgctgggt aaatggaaag agtatcgcgt gctgttaaac cgggtggatc tgaatactgc
    28021 cccggatatc gtctggccgg aggctccggc ggtatgacgt ggcggcaagc tgatattcgt
    28081 atcgcatcct caccgccacc ggtgacctgt tcggtgttgc cggttcatcc gtggatctat
    28141 ggcgtgggta acgtgaccga taacggccat tatttaagtc cggccaatgc ggtggcttac
    28201 ctggctgaac ggctaggcac tgcggcggat aatctgaccg tgtgcgtgtg gatggtctgc
    28261 gggagtgggc tgggggaatt cctgcaagcg ctggatgcac taacggtggt tttcccggcc
    28321 ccggcattga gccaggttgc ccgacaggcg cgggctatgg cggagctggc tacagtgaaa
    28381 atgcaaatcc cggccaaaag ccgcacgttg cccgccgccg cgtcgctgtc ggtggcacgc
    28441 tgccgtcagg cgttgaacgc ccagcgtatg gcggcggcgc agcagcaggc caccgtaccg
    28501 atggggctga atgcgctgaa agggatggct gagcgcttta catcccagcg cgatgccgct
    28561 ttatcggaaa tcagtcaggc catgcagcag atggcccagt gcagcgcgct ggcgtgggtc
    28621 tttaccggcc agggcgcacc gggtgtgata gcggcggaga tgctgaaaaa taatccccaa
    28681 gccatccgcg atttatactg cggccatgat gtttacaggg aaagagctgg atgcgttgga
    28741 gagcatgatc cgtgagccag ataatcacac tcgcccttga tggcgaagct atccccctgc
    28801 gtggcctgac cgtcacgccc tcaatgcaat tcgaagaaaa agaccagtca gggcaaacgt
    28861 ccagcacggc taacgctgag cagggtatca agcctaaaga gctgcgcgtg tctggcgtga
    28921 tcccgtttac tgaggcgaag gtgttaaccc ggctgtttac cctggcggaa gccaaagagg
    28981 gcagcaagct gaaacgctat cgggtagcca accctaccgc acaggcgatc aacttccggc
    29041 tggccacctt taccgggtcg attgacgccc caaaacagga tagcaaacaa gcctggctgg
    29101 tgacgtttac gttgcgcgaa catatcagtg tatcggaaaa gcgggacgcc cgcgcaggca
    29161 atcaaacaga aacgaagaag caggcaccgg ggcaggggag tgctgccggt gagggtgatg
    29221 aaaaattaag ctggtttgag cgcaaagtgc tgaaaccggt caatgacgca ctggggtaag
    29281 caatgcgacc gattacgcga ctgatgttat ctggcgatgc ggtacatgtt gtggacgcca
    29341 atgtggtact ggagttaaac gcctgtggcc gtgggtttat cacggttgag actgagcagg
    29401 attataccgg caaactggtc aggctggatg tgggctatac cgatctggtg ttgcgctggt
    29461 ttaccggtta cgtcgaacgg agccaacccg ccgaaaatgg ctatcaacgc ttgtttgtgc
    29521 gcgaactggc gggcgtattt gaccggatgt ggccgtgttc gtttcagcat ccgacgctcc
    29581 ggcaactggc ggactggctg agtgagcaca gtgggttaac ggtgcatctg cctgatgccg
    29641 ggtatgtcag ccagccaatt ccgcatttta cccatagcgg cagcggtcat cagttgctgg
    29701 ccaacatcgg ggcggcgttt gggattgatg attatgtctg gcaaccgtta ccggatggtg
    29761 cgttatatct cggcagttgg gccgattccc tgctggctgg tgcgccggtc atcatcccgg
    29821 cggagttcag ccaggcgcag gccgccggta atagtatgac gttgccgttg atacagtccg
    29881 tcaggcccgg cgcggtggtt aaccagcagc gcctttcccg cgtgcagttg ctcaacgaaa
    29941 gcatgacgat agagtgggtg ccggtgagca ctgtcaccgg caaggcggcg cagcgaaccc
    30001 cggcccagcg tcagatcgat accgtttatc ctgaactgtc ggccggattg cacctgccga
    30061 agtttgcccg cgtggaagcg ccatcagaag cggtcagcag cggtaatatc gccgaccctt
    30121 tccggccccg ttatgcggtt gacctgcaat tactggatgc agacggtaaa ccggcgaaag
    30181 atacgccggt gtatccggca gtaccgctac cggtacctat ggccgggagt gaggccgggc
    30241 tattccagtt tccgccgccg ggtacgctgg tcgaggtcgg gtttaccggc ggccggccgg
    30301 ataaaccgtt tgtacgtcag accgtggcca gtggtcagtc attgcctgat atcaagccgg
    30361 gggagcagtt acagcaacag cgggcggagg tttcgcagcg tgtgacggtc gccggggatt
    30421 gggagcggaa gacggatcag gccatcaggg aatcgtcaat gcaccgggag gtgagcgccg
    30481 atgaagaacg gcgcacgctg gttaccagag aaaccctgat taaagcgacg gatagtgcca
    30541 cggtgctggg tacccacaca ctccaggccg gggccatcgt gcaaatcgcc cagggggatt
    30601 acagcctggc tacgcaggcc ggttatacgg ccagtgtggg ccagtcagcg acggtagaga
    30661 taggacagtc gctgaccgag aaaatagggc aactgcgccg tagcattgcc ggtgcgcgtc
    30721 aggaactgat ggcaccggtg gtgtgggtcg gtagccagca ggtcaacgtc atgacgctga
    30781 tgctggacac cctggacgtg attcaggaac tggcgacgca gacggccagc cacacgcacc
    30841 ctaacaccgg caccccgtta aatgcgggcg agatacagca gaccggccgc cgcaccggca
    30901 cacttaaaga caagtacagc ccgataatcg ggtgatcgat ccccgcctac ccagcccgcc
    30961 gcgtgcgggc ttttttacgc ccctcgtatg acgcactcag cgggccgcta tgccacgccc
    31021 tttcccggtc acctcgcccc gccatgccaa cccattgcgc cgctgcctgt accccgctga
    31081 cgcagccagc gcaccgacaa aatgaacgct cacagagaca aaatcggcac tacaccgcac
    31141 ccgcctgcgg ttttcggagt cacaaagatt tttcagtttt atttttctac aaaacccaac
    31201 gccagcccgc gccgccgctg ggcttttgcg gaagaatgcc cactgaaaac agcgaaagga
    31261 atttcagcgt ttttcagttt tttggatccc gacttgatcg ctatgaaatt ttaaatatca
    31321 gaaataaaag gattttatat ggattttgtt gtttgggatg gatccctgaa tgcatagaag
    31381 gtgttacctc gggtggggcg gtttgcagca atgatgcggg ttttggtgtg gtgaggctgt
    31441 ttgcaggaac tgaaaagcgg tgaaccccgc cagggcgggg cgaggtgctt aaagcttgcc
    31501 ttcggtaatc ccaaaatcga cgatgctctt accttgaagg tcataggtgc agttgtatgt
    31561 catcgtgatt tttgcattga aaccgttggt aaatttcact ttgtcaccga tgaacgtcat
    31621 ttgttttttg gcttcgttca ggcggaaatg tgaaaacatg ggggtcatca tgccgtcagt
    31681 ccactcgaaa tcatacttgg atgacttttc tatcagagga cggcagcgtg atgctgcttc
    31741 aatccagttt ttatcaaaca agcattgacc gtcatttgct gcgcaattct ttggggtgtc
    31801 ggcttttgcg gcgggcttgt catcacttcc gccaaagatt tttatagcgc cccaaaccag
    31861 taacaccaga actacaaaac caccgattgc ctgacctgct gtagtaccgg gattcttaac
    31921 gccgcagtgt gggcaaactt ttgcagaggt tgatacttct ttcttacatt ctttgcattt
    31981 tgttaaagcc ataaaccaag tcctatttga ttcaaagaag ctaaataata tgacaagcaa
    32041 taggggaaac tacagagaag gccgcgcgta tgatgaaagc ctgtcgccat tttgtcgcca
    32101 caggtaataa aaaaggggtt ccgttttcac gtaacccctt gatttaattg gtggagctgg
    32161 ggggagttga acccccgtcc gaaattccta caccgtcggt actacatgct tagtctggtc
    32221 tttacattcg cttgccagct gcggacagac acgccactaa caaactagcc tgattggatt
    32281 taacgcttca accccaggca gggcatccac gcgatctctt ttgggtttga cctctcttga
    32341 tccccgtcct aagagcggag gctagggaga gaggacacct tcagtttctt aggctgatta
    32401 agctgcgata gcagcaggtg cgtagttttc gtcgtttgcg actatttttt tgcggctttt
    32461 tacgaggcca accgcccctc ggcatgcacc ttgggtttcg cgaatcccgt cgaatccaga
    32521 atcagcccca agatatttca ctattataac agaaagatga ctcgctaatc taccgttagc
    32581 gagcggcatt tttcatgatg cgcgctttgt ccagcttcca ttcgcgctct ttgatatcgt
    32641 cacgtttgtc gtgttctttc ttacccttgg ctacgccaat cttgaccttg caccaggcgt
    32701 ttttccagta cagcgacaac gccactaccg tatagccttc gcgattgaca cggccgtaca
    32761 gcgaatccag ctcgcgctgg ttcagcagca gtttgcgggt acgcgtcgga tcgcaaacca
    32821 cgtggctgga tgcgccgtgc agtggagtga atgtggcgcc gaaaaggtaa gcttcgccat
    32881 cacgcatcaa cacatagctg tcgctgatat tggctttgcc tgcgcgcagt gatttgactt
    32941 cccacccctg aagtgccaat cccgcttcaa tctcttcttc tatgaagtat tcatggcggg
    33001 cgcgcttgtt gagcgcaatg gtggcagaac cgggcttatg tgcttttttc tttgtcat
//
