# Supplementary material for: May the Phage be With You? Prophage-Like Elements in the Genomes of Soft Rot Pectobacteriaceae: Pectobacterium spp. and Dickeya spp
Source: Front Microbiol. 2019 Feb 14;10:138. doi: 10.3389/fmicb.2019.00138 (PMC6385640; doi:10.3389/fmicb.2019.00138)
Supplement: Supplementary file 2 [file Data_Sheet_2.ZIP › Supplementary_prophagesGENBANK_files/Genbank FILES _SRP_prophages/phiD4.gb]

LOCUS       Exported               40280 bp ds-DNA     linear   UNK 02-AUG-2018
DEFINITION  phiD4.
ACCESSION   .
VERSION     .
KEYWORDS    .
SOURCE      phiD4
  ORGANISM  phiD4
REFERENCE   1  (bases 1 to 40280)
  AUTHORS   .
  TITLE     Direct Submission
  JOURNAL   Exported Aug 2, 2018 from SnapGene Viewer 4.2.3
            http://www.snapgene.com
FEATURES             Location/Qualifiers
     source          1..40280
                     /organism="prophage phiD4"
                     /mol_type="genomic DNA"
                     /note="/genome_id=6666666.356853"
                     /note="/genome_md5="
                     /note="/project=robertczajkowski_6666666"
                     /db_xref="taxon:6666666"
     CDS             1..312
                     /codon_start=1
                     /product="Phage holin # possibly family II"
                     /label=Phage holin # possibly family II
                     /db_xref="SEED:fig|6666666.356853.peg.1"
                     /translation="MNETDKSIVSLFIIGTLIAAGKVLAGSEPITLRLFIGRVMLGGFV
                     SMMAGIALVQFPDLSPVAINGIGAALGIAGYQTIELLIQRRVRQLGKKSTSEKNNDAQ"
     CDS             302..790
                     /codon_start=1
                     /product="Phage lysin, 1,4-beta-N-acetylmuramidase (EC 
                     3.2.1.17) or lysozyme #Protein S in phage lambda"
                     /EC_number="3.2.1.17"
                     /label=Phage lysin, 1,4-beta-N-acetylmuramidase
                     /db_xref="SEED:fig|6666666.356853.peg.2"
                     /translation="MLNNPNLIAFLDMLAFSEGTATHPLTCNRGYDVIVTGIDGKPEIF
                     TDYRDHPFANGRPGKIFNKQGQRSTAAGRYQQLYRYWPAYKTQLALPDFGPNAQDTLAI
                     QLIREQRALDDITQGRLASAITRCNNIWASLPGAGYGQREHNTERLVAVYQQAGGKLA"
     CDS             787..1227
                     /codon_start=1
                     /product="Phage spanin Rz #LysB"
                     /label=Phage spanin Rz #LysB
                     /db_xref="SEED:fig|6666666.356853.peg.3"
                     /translation="MKSAMIIAVIMIALSAGVGVQSWRLHNARQLTDQQAQTLSLQQTA
                     LDEKSGQLKALSEQAERNNLEQARLRDMAAETQAARSERQKVVMRLQHENEALKRWADT
                     DLPTDIIRLRQRPAFAGGRAYREWLSQTDTLPVPGGQSANQR"
     CDS             complement(1656..1853)
                     /codon_start=1
                     /product="hypothetical protein"
                     /label=hypothetical protein
                     /db_xref="SEED:fig|6666666.356853.peg.4"
                     /translation="MLQNYFYDQHDVARSDEEKREIVISAILEIIKEGASESGVQVALD
                     AIGSRITETADIIQRALEND"
     CDS             1995..2117
                     /codon_start=1
                     /product="hypothetical protein"
                     /label=hypothetical protein
                     /db_xref="SEED:fig|6666666.356853.peg.5"
                     /translation="MENRFDYKHRFKGDGAGYIAKNIGDYALNNKRCKKTPAID"
     CDS             complement(2509..3516)
                     /codon_start=1
                     /product="Phage integrase"
                     /label=Phage integrase
                     /db_xref="SEED:fig|6666666.356853.peg.6"
                     /translation="MAVNKLPSGKWLCQCFPYGRDGQRVRKQFATRGEALAYERRLMAD
                     KKGISTETNSTTLQDLIQRWYDMHGQTLESGEDRYSKLMAICERLGNPFAIDVDKNMFA
                     VYRERRLKGEWNPKGKTAIKEATVNREYSYLRAVFSELKRMGEWEKENPLDGIRQFKEG
                     DQELAFLYPDEIKRLLAACDESENKDLGIIVRLCLATGARWGEAQTLKQSQILPGRITF
                     VKTKGKKNRTIPISERMHALLPKRRGQLFKPAYEAFKHALKKAHIELPEGQLTHVLRHS
                     FASHFMMRGGNILVLQQILGHSSITMTMRYAHFAPDHLDAAVTLNPFDSLTTDE"
     CDS             complement(3523..4407)
                     /codon_start=1
                     /product="hypothetical protein"
                     /label=hypothetical protein
                     /db_xref="SEED:fig|6666666.356853.peg.7"
                     /translation="MADEKLDFFNYKRNKDKLLINLINIIEGINCDGHIDEKEVLFLDT
                     WIKDADLISKNYCVRMISNRLSDILSDGVIEPYELNYLKADLIKVQKELSDLPELDLYS
                     DEADKHLLEGLCKGMMANHELNDSEIRYLNWWLSSNASLKVNYPGKELYALVNRILADG
                     IITSEERDELKKALIAFTGSDVDSGVVDGLATRLPVDDIESLVLSNATVCLTGEFLYGK
                     RTVCKKLIEDAGGKVIDNITAKLDFLIIGTLSCKHWRYQAHGRKIEKAIDYRDNRGIPL
                     KIISEEQWQSFTG"
     CDS             complement(4500..5678)
                     /codon_start=1
                     /product="hypothetical protein"
                     /label=hypothetical protein
                     /db_xref="SEED:fig|6666666.356853.peg.8"
                     /translation="MTFEEWISKTEKEIFFTYINANNEVSNNYVVDAVYKDNYLQGYCI
                     NKKGFRTFKLERIIDVYSSNEEMVSAASPLAIADLKIETRRVKDTPRGLEICFTGFDKD
                     IKDELESLAEKKGLLVRKGITAKLYFLCCGPNAGWKKIKQANEKNCFILSKDQFFSFVD
                     TGEIPIEPTEVYESDEKDIHEKIEILHNEVTSTFRTIREPRRSSALIARFVDGYAAGWR
                     FAIRESHRDALDIKLTKFVFNKYQYEDWTQGNSFSFGRGDVFYSDKLGYSEWSEFLKIP
                     DAVALQVKYECFSGYDPVATIDGFFSGDFIPYHQLTPKKLTNLPIMIESQSYDPGKITL
                     DIFKPSIDRSKIDLFDTIKITQDELISLLQSGYYWKKDEGKKPVRVNLFGDN"
     CDS             complement(5758..6369)
                     /codon_start=1
                     /product="hypothetical protein"
                     /label=hypothetical protein
                     /db_xref="SEED:fig|6666666.356853.peg.9"
                     /translation="MSVESHGNENRVAGRDFYESSITVDKINIAIPAANEEKRPLVPAQ
                     RKQLNQLVKEIADGGYEEGFSVWQRVHAEIGVKSIEDMTVNQYQTAVSYLQALRDRYRE
                     KDASNALVHLLLKNTQQVDQRQQLIHYCHIHFGTGRLTELTRSQLQQALSWLDDRQCSS
                     VPGQTTPNTRQSWQEVLKAEPLVFSAVFVAGIILGAIFFR"
     CDS             complement(6385..6705)
                     /codon_start=1
                     /product="Transcriptional regulator"
                     /label=Transcriptional regulator
                     /db_xref="SEED:fig|6666666.356853.peg.10"
                     /translation="MGDIGGVKKLTQLNYEKGDRMPDAAYLNAVSKIGVDVQYVVTGVR
                     SAATLTDEEQQLLGNYRTAPLTVKAAVLAALTAGSSVSTGSINVTGSGQRVAGRDYHEN
                     KK"
     CDS             6849..7043
                     /codon_start=1
                     /product="hypothetical protein"
                     /label=hypothetical protein
                     /db_xref="SEED:fig|6666666.356853.peg.11"
                     /translation="MTQENHDQRSRLPRGIASRNPTPMRLSEDERARLAALAEKESRSL
                     SSMARLVFLRGLESFNAEG"
     CDS             7049..7261
                     /codon_start=1
                     /product="hypothetical protein"
                     /label=hypothetical protein
                     /db_xref="SEED:fig|6666666.356853.peg.12"
                     /translation="MSKALTINITIPTAYVSLRKYSELTGIPFETCRGMVKSGKIIIRP
                     KEKANEKVEVNLVAMLRDAIASSEI"
     CDS             7702..8043
                     /codon_start=1
                     /product="Phage protein"
                     /label=Phage protein
                     /db_xref="SEED:fig|6666666.356853.peg.13"
                     /translation="MANTEPARAIPLSIAERTDGLNHIAMLRGKHFKTNSEKEMCRFID
                     DMRDKIDDDYHKNMRVLSAIFELADIDKERHHLKFNELTTDEKERLIKAMNKLRAVVSL
                     FPKNLILPL"
     CDS             8108..8338
                     /codon_start=1
                     /product="hypothetical protein"
                     /label=hypothetical protein
                     /db_xref="SEED:fig|6666666.356853.peg.14"
                     /translation="MKNAEVKTMTVANDGALVELLKKARLEERKDQHFSFSLRLAALAV
                     RAQQRDLSAAEMVELIRQESERFERSAQELS"
     CDS             8338..8562
                     /codon_start=1
                     /product="Phage protein"
                     /label=Phage protein
                     /db_xref="SEED:fig|6666666.356853.peg.15"
                     /translation="MDSIDMAQEREAFIRETQIQKARQQSGCAVSAFVCESCDAPIPEA
                     RRVAVPGVRLCVYCQGDAELKNKHYRGAL"
     CDS             8559..9515
                     /codon_start=1
                     /product="Methyl-directed repair DNA adenine methylase (EC 
                     2.1.1.72)"
                     /EC_number="2.1.1.72"
                     /label=Methyl-directed repair DNA adenine methylase
                     /db_xref="SEED:fig|6666666.356853.peg.16"
                     /db_xref="GO:0009007"
                     /translation="MSIIATPLKWVGSKARIMDILREHLPAGDRLVEPFAGSCSVMMNT
                     DYPEYLIADINPDLINLYQVIKEDLKEFIDTAEGLFRTANTAESYYRFRQVFNRSKENR
                     TTSAALFLYLNRHGYRGVCRYNRAGGFNVPYGHYASPYFPLAEIQAFAEKARHAKFICA
                     AFGETLQLSRPGDVVYCDPPYIPQTPTASFTSYHTDGFTHNDQYDLCCALSRLAERGIP
                     VIASNSDTHHAHSLYHRFDICRFTAPRSVGVAAGESKQAGEIIAKRLPIPAARSLSKVC
                     DGCGYEGGGHCPDYGPVMGDATYQEMVASGALNAEPF"
     CDS             10194..12602
                     /codon_start=1
                     /product="Phage replication protein # Replication gene A 
                     protein"
                     /label=Phage replication protein # Replication gene A
                     /db_xref="SEED:fig|6666666.356853.peg.17"
                     /translation="MVKRALAAPGDDRNLNQVVAQLEHREPNGTQLLIRRGLAEIVRRD
                     HQKTLSDWMKTPEGVEARLHEQPFFIRDVYRQKIEWLRANREPRHISAFFMGTVKKALM
                     RLDAVRMQQGVRNGFASELAAYWGPRWVHLAGFTKHEVINAAHTLAAAIAEMFETECGH
                     TSPENMTDNEIQWLYRHLGRELLALRVTPPCWGLVIGDEQARHRIYSAILRITSPEWWG
                     RKLWRLRCEWRENQFRAIGVIHKKRMPYVSLDALNQWQEQRRKNLAFFQTHELVDEDGN
                     IASLENMVYGSISNPAIRRHELMTRMAGVEMVAIARGDEGVFLTITCPSRYHANILNGH
                     QNPKWDHTSPRQGQRYLCRTWARAMSALNRRGLRPYGFRVAEPHHDATPHWHVLLFMPP
                     ADRKAITDILREYFIAEDRAELGRNTGARFKAKMLDPRKGSATAYVAKYISKNIDGYAL
                     DGELDNETGKPLRETAKFAMAWASQHNIRQFQPFGLPPVTVWRELRRLANQLTAVQKEN
                     GTFKRGAAQLADPAMDAVLASADAGCFATYIEKQGGVLIPRERYTVRIAYEDADEQNTY
                     GETPEKIFGVFSPRLGAISRICTRLIKWKIRKKQSADDGASIGTGSGLAVTSPTGDAWS
                     SVNNSTGDEKTSIPTGIDGDDYGSCELPDGEPGDTPAQTFADFERMTDPERRALLSRLR
                     TQPPDRRNNQHSSTTQRNKSAEKQVVGKLSDEWRASIADFARSIGWDISNIEIQRLALG
                     HTLTFADQLYVSRSDGCLYRVRRERRPEDVAATVSNWIARLRMEGYQEE"
     CDS             12696..12971
                     /codon_start=1
                     /product="HicA protein"
                     /label=HicA protein
                     /db_xref="SEED:fig|6666666.356853.peg.18"
                     /translation="MKEQVSSLRKRQRSTLEQVFKSPVQSGIKWADIESLIKALGGEVK
                     EGRGSRCKFLLNGSIANFHRPHPSPDTDKGAVANLRDWLESIGVKP"
     CDS             12968..13327
                     /codon_start=1
                     /product="HicB-related protein"
                     /label=HicB-related protein
                     /db_xref="SEED:fig|6666666.356853.peg.19"
                     /translation="MSKPSTPNTIEIAGQPAVISYVPELGTFRGKFMGLTGYCDFVSDS
                     IQGLKKEGEISLREYLDDCSAAGIEPYVRQERVKTFTLRYPESFGERLNQAAAEQETSV
                     NAFIIETLNERMKHA"
     CDS             13643..14995
                     /codon_start=1
                     /product="Retron-type RNA-directed DNA polymerase (EC 
                     2.7.7.49)"
                     /EC_number="2.7.7.49"
                     /label=Retron-type RNA-directed DNA polymerase
                     /db_xref="SEED:fig|6666666.356853.peg.20"
                     /translation="MPIAPQLTIVKNKTKTMSKNNKLSELKSAKNITDLAKIISVPRQS
                     ITYVLYGINRLNLAKYHTFKIPKKDGSERTINAPVKELKDIQKKVSSLLQECFRIVCIL
                     EGHRNHLKKINSLSHGFIKGKSIITNATPHKNKRFVLNVDLKDFFGQIHYGRVYGFFKN
                     NKHFQLSDEVAKVLANITCYQQGLPQGAPTSPVISNLIAGILDIKLASLAKKYSCYYTR
                     YADDLTFSTNLKEFPPRIASIENGDVRIGSSLEGIIKKCGFDINHKKNRLQFCNSRQDV
                     TGIVVNKKVNVPYDYRNKARVIWHKLKNGKEIYAINSQPEIKKDINYLIGILSHIHNVR
                     REHRVTTKEEYIIPKKPNKKTFDDIFDADSRMYRDVLFFKNFVKNKKPVIVCEGKTDIT
                     YLQCALESQAAKHRSLIIKKELQISFFRPTKTISELFKVTGGTGDIGNLIS"
     CDS             15175..15429
                     /codon_start=1
                     /product="hypothetical protein"
                     /label=hypothetical protein
                     /db_xref="SEED:fig|6666666.356853.peg.21"
                     /translation="MQTPLIKGGDSAIEDFFDTATLNEKLEKKTFSYKGTFDTDKHYGK
                     NHFAEYVVKPKRKTIDFTGFNVLLNDIKKIIKDYKAKKH"
     CDS             complement(15569..15682)
                     /codon_start=1
                     /product="hypothetical protein"
                     /label=hypothetical protein
                     /db_xref="SEED:fig|6666666.356853.peg.22"
                     /translation="MRRIWGKKNLPKQVSEKVSEWMKSALMLPEQGTLSGS"
     CDS             complement(16076..17128)
                     /codon_start=1
                     /product="Presumed portal vertex protein"
                     /label=Presumed portal vertex protein
                     /db_xref="SEED:fig|6666666.356853.peg.23"
                     /translation="MKRKDKTGTHRAVTASQPDMAAALKSDPGLSAFTFDGPYPVRDGH
                     DLLDNMYCADNGRYYDTPVDWYGLARAFGSASWHQSALYFKRNALTGCFIPHPLLSRQA
                     FSAFVLDWFVFGNGYLERRVNRLGGLLALRHVPAKYTRRGSDLNTYWFIRQWKDEHTFA
                     TDSVCHVINPDIHQEIYGMPEYMGALLSASLSHSADMFRKLYYDNGSHAGCIIYIGASQ
                     VDTESMDNVKKTLKEARGKGAFKNLLLHAPGGGEKGVQIIPFSQISAKDEFLNIKSVTR
                     DDILAAHRVPPQLMGAMPEGNGSFGDVEKAARVFAINELMPVMEALKHVNDWLGMEVIR
                     FNPYALLKTE"
     CDS             complement(17128..18855)
                     /codon_start=1
                     /product="Terminase, ATPase subunit"
                     /label=Terminase, ATPase subunit
                     /db_xref="SEED:fig|6666666.356853.peg.24"
                     /translation="MIQDAFVRQRARQLYWQGYPPAEISRLMGINQNTVYAWKKRDEWD
                     ETPPIQRVTHSIDARLCQLAQKPTKTGGDLKEMDALTRQLKTLNDGQPGNAASGKKPRK
                     RKVKNHFTDEQIAALRTNILDSLAWHQNGWYAQQDQRNRMILKSRQIGATWYFAREALL
                     RALRDDVAYPYQRHQIFLSASRRQAHQFRGFIQKVAEEVDVELKGGDKIVLSNGAELHF
                     LGTSAATAQSYTGNLYFDEFFWVSNFANLRKVAGAMATLKGLTRTYFSTPSSETHEAYP
                     FWTGARWNEKRSKVQKVAFDVSWKALNSGLLCPDKTWRQIVTLQDVIDHGWQYTDLEEI
                     RDENSPDEYNNLYGCEFVRDGESAFNLNLLFSCGADGYDEWPDWKPFASRPMADRGIWI
                     GYDANGSSGNGDSGAISVVVPPLVAGGKFRTIETQQIRGLEFEEQAKVIEALTFKYNVQ
                     HIAIDGTGIGEAVYQIVKKFFPAAVCFLMSVSSKRALVLKMLQVIRAGRWEYDRSEQAL
                     INAFNAVRRVKTPGGIMTYDTDRARGSNHGDLAWATMLAVINEPLGQEQGGGGFAMEF"
     CDS             19015..19854
                     /codon_start=1
                     /product="Phage capsid scaffolding protein # Fam Scf032"
                     /label=Phage capsid scaffolding protein # Fam Scf032
                     /db_xref="SEED:fig|6666666.356853.peg.25"
                     /translation="MSGTTKPTRKKFRVAVSGSTVDGREIGRDHLYAMAESYNPQVYGA
                     RVNVEHILSPYPGSDFSAMGDVVALSAEDITDGPLKGRAALYAEIEPTERMKQLTGEGK
                     KIYSSIEIDPQFAATGRPYLRGLAMTDTPASLGTERLKFAAQQRAQVQAFNNLPGEPVM
                     FTEAMEAELVELSEQRSDEGKQWFSRVMGIIGKGRKSDGEQFSQVREAVENVAQSHADL
                     LDNFNALKNQQQQDSRTIQTLTSELAALTQKLATQDNSYSQRPAASGGNSGAQLADF"
     CDS             19880..20935
                     /codon_start=1
                     /product="Phage major capsid protein #Fam0066"
                     /label=Phage major capsid protein #Fam0066
                     /db_xref="SEED:fig|6666666.356853.peg.26"
                     /translation="MENSTRNLYNQYISRQAQLNGVQPNDVAMTFSVEPAAQQRMEQAA
                     QESDEFLKQINVFGVKAQEGQKILIGSKGPIASTNNSSDGTSRRNPTDNHSKEPNTYHC
                     RKVNYDSAISYPQLDAWATQPNFQALISQANARQIGLDRIMIGFNGITYAEKSNRSANP
                     LLQDCGVGWLQKTRNDAGHRIIKNVTLTARDEDNKIIAKGTYGNLDTAVFDAKNSLLDP
                     WHRKAPDLVVIMASDLLTSSNFPRLNALSQSNPNTELLAGQLIVSQERVGGLPTFLAPY
                     FPSNAVLITSFKNLSVYYQLGALRRSIAEEPEYNRIATYQSSNDDFVVEDYGKVALIDG
                     IQFAQAAGDGQ"
     CDS             20978..21862
                     /codon_start=1
                     /product="Phage terminase, endonuclease subunit"
                     /label=Phage terminase, endonuclease subunit
                     /db_xref="SEED:fig|6666666.356853.peg.27"
                     /translation="MLTPAQRHFQRVMAERRGQADTETEVSRTAHEQILHRLRLHQAAL
                     KQVQSAATKAEMKKAMLPEYDGWIDGTLEGDSGRQDEVIVTLMVWAIDCQDSALTLRLG
                     RYVVKHGLSLPADKFRRDAVTVLAEEVSNPVLTLAATDDRADLSGYTAVLDEVAAIVDG
                     KDMPDEVRAKLCKARAFSRRAAVDAQTKAEALKLFREAMARNPNAGVKRDIATLTRELK
                     KLMPASSDEPEDGAPGDDGAATEPPVGETTPATTPTDAAQPAAKPAAVRNTTARKTTRT
                     TGKSKAARQSAKR"
     CDS             21961..22452
                     /codon_start=1
                     /product="Phage head completion-stabilization protein"
                     /label=Phage head completion-stabilization protein
                     /db_xref="SEED:fig|6666666.356853.peg.28"
                     /translation="MSLVASKRVSDSGDVPEIDDGAAAVSAGDFWPVIVLRDLRLAARI
                     TGGITTTRLMHVTTEAVVHVTDQLASWQQTQQAAGYAALADVPAGQVNGESIKVYRFKR
                     AVYAIARALLLEGYRDVDTTAKGDKATDTFDSQRDDLWRDARWSIADIRGAQRLFAELC
                     "
     CDS             22446..22652
                     /codon_start=1
                     /product="Phage protein"
                     /label=Phage protein
                     /db_xref="SEED:fig|6666666.356853.peg.29"
                     /translation="MLMVVRALQGDTVDLLCYRHYGTSAGVTEQVIAANPGLSRQMFLT
                     AGQAITLPDIPRQTEQETVQLWD"
     CDS             22643..22945
                     /codon_start=1
                     /product="hypothetical protein"
                     /label=hypothetical protein
                     /db_xref="SEED:fig|6666666.356853.peg.30"
                     /translation="MGLNDLQRLNDGVTYGLSVMVTGIGVMTVSEKVALAGLVIGVVTA
                     WRAWLFRRRIERAQRRRNELIEQILQQSERRTLNTSERRAVAILHQGDVDDENRD"
     CDS             22929..23474
                     /codon_start=1
                     /product="Phage lysin (EC 3.2.1.17) # Phage lysozyme or 
                     muramidase (EC 3.2.1.17)"
                     /EC_number="3.2.1.17"
                     /label=Phage lysin
                     /db_xref="SEED:fig|6666666.356853.peg.31"
                     /translation="MKTAIKRCSIALIVALGVTLSPGTLRTSPEAQQKTASWEDCRASP
                     YYCPAGVLTVGIGSTGNVQNRPYSNDEIARRWVNDMQRAENCVNGNFNGAAMPQSAFEA
                     MTDTAFNLGCSGLMWFTNRQGSKQRTTIWKHAQAHEWPAMCERLTDFVNSGGQRSAGLV
                     NRRSDFKAWCLRDLAGVP"
     CDS             23471..23908
                     /codon_start=1
                     /product="hypothetical protein"
                     /label=hypothetical protein
                     /db_xref="SEED:fig|6666666.356853.peg.32"
                     /translation="MKLAATLAVLLVLAVGGVLWQTYQRGIDWAHTEALTDSAQQQREL
                     LTEFRALADDARNVLAQVREREQQRYAEGEERREKMREGMQPDTCANTVVPVAVSDSLQ
                     KRAAVVQRADTARPGTTQPDGTHTDARTENTGDLGRGRALE"
     CDS             23877..24014
                     /codon_start=1
                     /product="hypothetical protein"
                     /label=hypothetical protein
                     /db_xref="SEED:fig|6666666.356853.peg.33"
                     /translation="MTWGAVALWSDQLLDALDTCNADKAAINDVYLRRLQRLKDAAATP
                     "
     CDS             24025..24483
                     /codon_start=1
                     /product="Phage tail protein # FIG072132 and FIG003673"
                     /label=Phage tail protein # FIG072132 and FIG003673
                     /db_xref="SEED:fig|6666666.356853.peg.34"
                     /translation="MLKTDSLRDALTASNVWCRANPEAFTVFVEEGGIETTGETPSFLY
                     RYSLVLFVMNFTGDIDDFTLPLMAWLWQNQPDLLLNPQKNREVKFTTLINNDDSADILF
                     EIPVRERVRVTRDDNGILRAEHLPEPRPRLTGGVWDAVLDDATGETAT"
     CDS             24480..25118
                     /codon_start=1
                     /product="Phage tail completion protein"
                     /label=Phage tail completion protein
                     /db_xref="SEED:fig|6666666.356853.peg.35"
                     /translation="MTDKLFHALDQVFDDILSGLSPAGRLKTARQVGQALRRSQQQRIR
                     AQRNPDGSAYATRRRKVLRSQQGMIFVWEGQVRHLKNWHGGRGKYGRTITGFDEDRNAI
                     RTFYRSDIERYIEINTQAVRRTTSKKAPMFQRLRGYRFLKMRADTDGASVGFDGMAARI
                     ARVHQYGERDKVGSGAFARYPVRELLGISPTDERLIQDTVINSLGSAAT"
     CDS             25115..25696
                     /codon_start=1
                     /product="Phage baseplate assembly protein V"
                     /label=Phage baseplate assembly protein V
                     /db_xref="SEED:fig|6666666.356853.peg.36"
                     /translation="MSAELMRLLENVLRVGVVTAVDPESWRVRVKSGELLTDWLRWNTT
                     RAGAFNVWIPPAVGEQVWLGCLGGNPETAVIIGSLFSEAHPAPGNSLKEIVITAPDGAR
                     FRYDAVAGALEATGMKTVNVVASVSVTLNTPVVECTQHLKARTVEITHGGTLAGNVVHS
                     GGALTSNGVQVDSHRHGGIQPGGSWTSGTQ"
     CDS             25693..26061
                     /codon_start=1
                     /product="Phage baseplate assembly protein"
                     /label=Phage baseplate assembly protein
                     /db_xref="SEED:fig|6666666.356853.peg.37"
                     /translation="MTATYTGMNPHGTGTLTDADQLWQSVRDILTTPLASRVMRRDYGS
                     LIPDLLDAPQNAVTRLQLMSAAVIALTRWEPRISLNAVDIRYSASGAVDVALSGLITET
                     MQAANAAITLRSDSDGNG"
     CDS             26048..26944
                     /codon_start=1
                     /product="Phage baseplate assembly protein J"
                     /label=Phage baseplate assembly protein J
                     /db_xref="SEED:fig|6666666.356853.peg.38"
                     /translation="MATVDLSQLPQPQIIEVLDFEVILQDVKAVMIAAFPAAQQASVTA
                     ALALESEPLAVIAQVIAYREMMLRQRINEGAEACLLSHAVSSDLDNLSANLNTARLTIT
                     EATDTADAVMESDSALRLRTQAAFEGLSVAGPTGAYEYFAKSASGKVADAKAISPSPAA
                     VVVSVLSAEGDGSASADLLAAVDAALSADDKRPVGDRLTVQSAEIVRYAITAVLYRYPG
                     PESEPIQQAAQQALTSWLGAQGRIGRDVARSAVMAALHVQGVQRVELLEPAQDIVISDT
                     QAAYCTGFTITEGGSDE"
     CDS             26937..27545
                     /codon_start=1
                     /product="Tail protein I"
                     /label=Tail protein I
                     /db_xref="SEED:fig|6666666.356853.peg.39"
                     /translation="MSNSLLPPSASDFMRHVASSTQHLSEIAVDLDTLWDAERCPTQLL
                     PYLAWALSVDRWDKRWSEQTKRQVIKAAWLVHRQKGTLAALRRVVEPFGYLIRVTEWWQ
                     TGGQPGTFRLDIGVQDAGITEETYLELERLIADAKPVSRHLLGLNIVMDSAGEIPIAAG
                     QYSGDALTVYPYFPETITTTGADRCGGAIHLSDNVSVNA"
     CDS             27542..29266
                     /codon_start=1
                     /product="Phage tail fibers"
                     /label=Phage tail fibers
                     /db_xref="SEED:fig|6666666.356853.peg.40"
                     /translation="MTTKYFALLTNTGAALLANATALGRQLSITQMALGDGGGTLPTPD
                     PAQTKLVNERRRAPLNSLSVDPANPSQIIAEQVIPEDEGGWWIREIGLYDANGNLIAVA
                     NCPETYKPQLQEGSGRVQTVRMILIVSSTDAVTLKIDPSVVLATRAYTDGKITEVKSYA
                     DTQASGAKSEAKTYADAQVNGAKSEVKDYADARASGAKSEAGAYTDSLMTAHLSAANPH
                     PQYAPIANPALTGTPTAPTASFGVSTTQIATMAAIQAAKGAIASVQSVSSTNALTASAA
                     GALVYMTGGTTFTTTLPGGSTVALGQTIRLINYSTVAQTLVSAGVDIIYGGAVAGSVSG
                     ISLPPGAGIELISRGNGEWDVIGGSLSIQYASGLTLVSPALSGAPTAPTAASGTNTTQI
                     ATTAFVRSEINSVVTGIPLPWPQATAPAGWLKCNGQSFDKALYPKLAAAYPSGALPDLR
                     GEFLRGWDDDRGVDGGRGIASKQAATGLRTGAMDYNGSDADSAGVYVGIGYADADSSVN
                     TVNFTNQGYPNGTLMAGGAGRDNGVSGTASNTVFSGGVNWITVRPRNVAFNYIVRAA"
     CDS             29266..29889
                     /codon_start=1
                     /product="Tail fiber assembly protein"
                     /label=Tail fiber assembly protein
                     /db_xref="SEED:fig|6666666.356853.peg.41"
                     /translation="MNEKYSVAVKGAALGQNGLAERAGWLTVYHVDPLTREYTGASYEY
                     LMVGTGLPADSYADAPDLPPAGQALRRRVDGEEWEHVPDYRGQTVYRTADGQQQTVTTL
                     GELPDELTLLAPTTAYDTWDGAAWVTDTAAKQAAATAAAQRELSARKATATARIAELSY
                     AVDLAMATEAERAVLTEWKTYLVQLSRIDTGAAPDIDWPEIPSS"
     CDS             complement(29918..30427)
                     /codon_start=1
                     /product="Phage tail protein"
                     /label=Phage tail protein
                     /db_xref="SEED:fig|6666666.356853.peg.42"
                     /translation="MMMVYGLFVFELQTLPYQQLQQSRAWRHVKNERINRSAKWQYIGA
                     GEDQITLSGVLYPEITGGEVSLTALTTQAYSGRPWPLIDGTGQIYGMYVLTGMHTTRTE
                     LNRYGKAKKIEFSLSFQRCDEDLREKLQSSSFSDMMDNARSSATKAMNTVSTAMTDTVN
                     TLKGLV"
     CDS             complement(30440..33415)
                     /codon_start=1
                     /product="Phage protein"
                     /label=Phage protein
                     /db_xref="SEED:fig|6666666.356853.peg.43"
                     /translation="MKSLDIRVAFSAIDRLTRPVNAARQSAGGLSESLKRTQAAIKDLD
                     NQSRTFNRLRDSVQKTSRKIDEASRSLDGLKKAQQSGTVLTDKQREHIAALAAKLERLN
                     VTRDQEMVKLRAVSQALRGHGVSLVGSNATIQSAIRRTEQYNQTLGRERRQLAAVTQAH
                     ARYERMQQTAGKLRGSGTMAVAGGAAAGYAGGQFLAPAVGFDEEMSRVQALTRLDKGDQ
                     QLAALRAQAKKLGAETAFTTRDAASGQAFLAMAGFTPQAIQAALPGVLNMALAGGMELG
                     ETADIGSNILSQFNLDASQMDRVSDVLTGAFTRTNTDLFSLGETMKYAGPVAAKLGISL
                     EDAAAMAGMLANNGIRGSDAGTAMRASLSRLASPPKAAAAALKELGVSVADAKGKMRPM
                     QDVLRDLYKATQKYGQVDQVSFFKDIAGEEAFVGLQTLVQAAGSGSLGKLSGELKKAKG
                     EADAVAKKMADNLGGDLKNLDSAWEGFRIQVEETADRPLRSLTQGLSDVITNVSGWVKE
                     NPRLTQTLLLAVGGATAFAVAIGGTSLAIGLLMGPLAKLQLGFSLLLGARGVGGAVSMF
                     SGLSSLLGGPMARMGGWLQLFSGSAGHLTTTLTPLRGMLLAVFTSPAAALGSLVRGVGG
                     LLLRLSGLPALWSLITGAVSVLGGVLSLLLSPIGLIGTAFVAAGLLIWRFWEPIKAFFS
                     GMFTGIVISLGPIRQAFTGLAPVFDVIVSAVSRLWDRFKQLFDPIQTTKKTLDDCAIAG
                     YGFGKVLGSALDMLLLPLQKLMEGIGWVLEKLGLIPSGLDAAQKKADQLKGELTPEGKN
                     RLQGLVTNLTGDLKGATTAPPPAPKPPLTGDSGTQRRLQKIADNTGGVLEETKKRIGPG
                     DIVFKNLPKALAVRGEWQEARLTGGTPSAPSQPAQTMQTLSDRPAVVAATQPVKQADAS
                     PVSRPAARTPAAGGFNGEIHIHLHGVERQDARELGRIVADAVSAELARRDRLQRGSFRD
                     RE"
     CDS             complement(33402..33560)
                     /codon_start=1
                     /product="hypothetical protein"
                     /label=hypothetical protein
                     /db_xref="SEED:fig|6666666.356853.peg.44"
                     /translation="MQFDQIDDLVADIAVVFNWPPSELFSMDLGDVIAWRARAAIRSGA
                     SEADEKP"
     CDS             complement(33566..33916)
                     /codon_start=1
                     /product="putative phage tail protein"
                     /label=putative phage tail protein
                     /db_xref="SEED:fig|6666666.356853.peg.45"
                     /translation="MAATSRPEPVTMNTPNEHTVTLATPIVRGDSTISQVSITDDIKQA
                     GSLRGLRLVNVLNMDVDSITTLLTRVTSPKLKLAEINAMDTRDFMRLAEAITPFLVHAE
                     PGEPNAEATEEA"
     CDS             complement(33929..34444)
                     /codon_start=1
                     /product="Major tail tube protein"
                     /label=Major tail tube protein
                     /db_xref="SEED:fig|6666666.356853.peg.46"
                     /translation="MAVPHKLRLFTCFVNGNNQIGKVTSVTLPKLTRKTEDFQGAGMIG
                     SVAVDLGMDSGALEAQMVVGGMEKKLLLEYGGDIDDVRLRFAGEYYTDGDSQLVEVEMR
                     GRITEIDGGESKQGEDTSVTYALKNTYYKLSIDDQSVLEIDLLNFIYKKNGKNIYPDRI
                     TSALGLGN"
     CDS             complement(34445..35761)
                     /codon_start=1
                     /product="Major tail sheath protein"
                     /label=Major tail sheath protein
                     /db_xref="SEED:fig|6666666.356853.peg.47"
                     /translation="MPHDFTRTRGEKWLFVVAGRPDPSARECATDIRDYRHELNNVMVA
                     NMSETRFHGVRVRENTDLVTAINDIDSNVIGVVAVADDADADTFPLNTPVLITRVNSVL
                     GKAGKTGSLYKTLKAISDQTSPKVIVVRVAAATEGGDKTQSQLIIGGTAADGSYTGMYA
                     LLTAEAKVNYRPRILAVPDYDTAEVTSALCVIAQNLRAFVYAGCHGCITMAEAITYRAQ
                     FAYRELMLIWPDFIAYNPQAGSNETFPAPAYACGLRAAIDNDQGWHKSLSNVAVNNVLG
                     ISRDVFWSLQAEDSDANELNNQEITTLIKRNGFRFWGNRTTDTHDYLFEVYTRTAQILA
                     DSIAEAQFEAVDEPLTPANVKDVVNGINGKLSALVTAGRLIGGECWFDIQDNPTTGLRQ
                     GQVRVRYKYTPVPPLEDLTLYQTFTDDYFESAFSSLGGV"
     CDS             35753..36916
                     /codon_start=1
                     /product="Gene D protein"
                     /label=Gene D protein
                     /db_xref="SEED:fig|6666666.356853.peg.48"
                     /translation="MRQKQGETMAITELADSLIGAAKRYDDALTEAVKSPAFSITLGGK
                     SLKELSDRLISLSLTDNRGFEADQLTLSIDDSDGRVELPPRGAQIALSIGWQGEALTYK
                     GLYTVDEISHEGPPDVLGVTARSADFREEFNVKREVSWHDVTVERVVSAIAHRYGMKAQ
                     ISDMLMNIEIDHADQTEESDMSFLTRMAEQLGAIATIKNGTLLFILPGGGVTASGKALP
                     SASLTRSSGDGHRFRIADRDAYTGVRAYWLDLKFGKKKKVSVKRRRIKPKPKKEKSSSR
                     EGDYITGAEGNVFVLRKTYQNEEAAKRAAAAKWRQLQRGAAEFSITLARGRAELYPEMH
                     LTVSGFKPDIDNQDWIIARAEHVIDGNGFTTRLELEAKIPDWIAESE"
     CDS             36953..37201
                     /codon_start=1
                     /product="Levansucrase regulator"
                     /label=Levansucrase regulator
                     /db_xref="SEED:fig|6666666.356853.peg.49"
                     /translation="MFRCPFCGAMARTRTSRRLSDITIRQYHQCQNLECSETFTTLNTV
                     ERRVSKRTREDPLPPDFIPQDAFPASHYGRDQLNLAL"
     CDS             complement(37249..37362)
                     /codon_start=1
                     /product="hypothetical protein"
                     /label=hypothetical protein
                     /db_xref="SEED:fig|6666666.356853.peg.50"
                     /translation="MPVIWQVAAKWQQSGSARFSGTKKAVFNQPPLLTVVK"
     tRNA            complement(37432..37515)
                     /product="tRNA-Leu-TAA"
                     /note="/transl_table=11"
                     /db_xref="SEED:fig|6666666.356853.rna.1"
     tRNA            complement(37526..37596)
                     /product="tRNA-Cys-GCA"
                     /note="/transl_table=11"
                     /db_xref="SEED:fig|6666666.356853.rna.2"
     tRNA            complement(37628..37700)
                     /product="tRNA-Gly-GCC"
                     /note="/transl_table=11"
                     /db_xref="SEED:fig|6666666.356853.rna.3"
     CDS             complement(37733..37852)
                     /codon_start=1
                     /product="hypothetical protein"
                     /label=hypothetical protein
                     /db_xref="SEED:fig|6666666.356853.peg.51"
                     /translation="MNIDRLALKNSKRFRWDDNFIDSLRQVSRMHRIDSDTVY"
     CDS             complement(37842..38390)
                     /codon_start=1
                     /product="CDP-diacylglycerol--glycerol-3-phosphate 
                     3-phosphatidyltransferase (EC 2.7.8.5)"
                     /EC_number="2.7.8.5"
                     /label=CDP-diacylglycerol--glycerol-3-phosphate 3-phos
                     /db_xref="SEED:fig|6666666.356853.peg.52"
                     /db_xref="GO:0008444"
                     /translation="MRFNIPTWLTLFRVVLIPFFVLAFYLPFSWAPMVCAGIFVFAAVT
                     DWFDGFLARRWKQTTRFGAFLDPVADKVMVAVALVLVAEHYHSWWITLPAATMIAREII
                     ISALREWMAELGKRSSVAVSWIGKIKTTAQMVALVGLLWRPERMVEAAGVAALYVAAVL
                     TFWSMFQYLSAAWRDLLEH"
     CDS             complement(38448..40280)
                     /codon_start=1
                     /product="Excinuclease ABC subunit C"
                     /label=Excinuclease ABC subunit C
                     /db_xref="SEED:fig|6666666.356853.peg.53"
                     /db_xref="GO:0003677"
                     /db_xref="GO:0004518"
                     /db_xref="GO:0005622"
                     /db_xref="GO:0006281"
                     /db_xref="GO:0006289"
                     /translation="MTERFDAQAFLKTVTSQPGVYRMYDASDTVIYVGKAKDLKKRLSS
                     YFRAHVASRKTEALVKSIRQIDVTITHTETEALLLEHNYIKRYQPRYNVLLRDDKSYPM
                     IFLSGDTHPRLSVHRGAKHAKGEYFGPFPNGNAVRETLMLLQKLFPIRQCENSVYRNRS
                     RPCLQYQIGRCLGPCVSGLVSEEEYQRQVEYVRLFLSGKDQQVLTRLIDRMETASRELR
                     FEEAARIRDQIQAVRRVTEKQFVSGDGDDLDVIGVAFEAGMACVHVLFIRQGKVLGSRS
                     YFPKVPGGTELAEVVQTFVGQFYLQGSVSRTLPSDILLDFSLPEHQLLAESLTEQAGRK
                     IQIQTRPRGDRARYLKLARTNAHTALTTKLSQQSTVQQRLAALASVLGIEKINRMECFD
                     ISHTMGEQTVASCVVFNADGPLRAEYRRYNISGITPGDDYAAMNQVLRRRYGKSIDEGK
                     IPDVIVIDGGKGQLAQAKDVFASLQVPWDKSRPLLLGVAKGSDRKAGLETLFFEATGEG
                     VALPADSPALHVIQHIRDDSHNHAISGHRKQRAKVKSTSSLETIEGVGPKRRQMLLKYM
                     GGLQPLMNASVEDIANVPGISHALAEKIFHALKH"
ORIGIN
        1 atgaatgaaa cagataaaag catcgtctct ctatttatta tcggcacgct gattgccgcc
       61 ggcaaagtgc tggcgggcag tgagcccatc acactgcggc tgtttattgg tcgcgtgatg
      121 ctgggaggtt ttgtctcaat gatggcaggc atcgcattag tacagttccc cgacctgtcg
      181 cccgtcgcta tcaacggtat cggcgccgca ctgggcatcg ccggctacca gactatcgaa
      241 ctgcttattc aacgccgtgt tcgccaactg ggcaaaaaaa gcacatcgga gaaaaataac
      301 gatgctcaat aaccctaacc ttattgcgtt tttggatatg ctggcctttt ccgaaggaac
      361 cgcaacacat ccactcacct gtaatcgtgg ttacgacgtg attgtcaccg ggattgatgg
      421 caaaccagag attttcaccg actaccggga tcatccattc gccaatggcc gcccgggaaa
      481 aatcttcaac aagcaggggc agcgctccac ggcagccgga cgctatcagc agctctaccg
      541 ctactggcca gcctacaaga cccagttggc gttgccggat ttcggaccca atgcgcaaga
      601 tacgttagct atccagctga ttcgagaaca gcgtgcgttg gacgacatta cgcaaggccg
      661 gcttgccagc gccattaccc ggtgcaacaa catctgggcc tcactgccgg gagcgggcta
      721 cggtcagcgc gagcataaca ccgagcggct ggtcgccgtg taccagcaag cgggcgggaa
      781 actggcatga aaagcgccat gatcatcgct gtcatcatga ttgcgcttag cgcaggggtg
      841 ggcgtgcagt cctggcgact gcacaacgcc cgtcagttaa ccgatcagca agcgcagaca
      901 ttgtcgttac aacagacagc gctggatgaa aaatccggcc agttgaaagc gttgtccgaa
      961 caggctgaac gcaacaacct tgaacaggct cgactgcgcg acatggccgc cgagactcag
     1021 gcggcgcgct ctgaacggca aaaagtggtg atgaggttac aacatgagaa cgaagcgctt
     1081 aaacgctggg ctgacactga tctgcctact gatattatcc ggctgcgcca gcgccccgcc
     1141 ttcgcaggtg gccgtgctta ccgtgaatgg ctgtcccaga ctgacaccct gccggttccc
     1201 ggcggccagt ccgcaaacca acggtgagct aaacagcctg ctggatgaaa ccgaagccgc
     1261 gctggcgact tgcgccgacc aggtggatgc cattattgcc tgtcaggcaa aaaacgatgc
     1321 tacgcccggc gccacgattg tatcagggaa tcaaccgggc aatagggatg ccgcagcggc
     1381 aacgcaatga tctccgccgt tgaggcaaga tgaatcacag gaaggtaaag ttgggaagcg
     1441 aagtctcaga ctgggatgtc agggcgaccg agccaggaaa ttgaggtatt cccattcaag
     1501 ccagtcgctc atagccttca gcccaaatca ggtcgggttt tcagggctgg aggtagcggg
     1561 ctgttcacgt ttcgacccgg cggctacata gtgaataggc ctgtcgtgac ggcaataaaa
     1621 aaccgcccgc aggcggccat aactcgttat agtaattaat cgttctctag cgcacgctga
     1681 atgatatcgg cagtctcggt gattctacta cctatcgcat ccaaagcgac ttgtactcca
     1741 ctttcgctgg caccctcttt gatgatctcg agtatagctg aaatgactat ttctcttttc
     1801 tcttcatcac ttcttgcgac atcatgctga tcataaaagt aattctgaag cataaagact
     1861 ccttttcatt atcaatggac gcagcatatc gctaagacta ttccgaataa agcattatca
     1921 caggtaaccg atgaatgcct gttgttattc tccgcgttta tatgcttttt ttgctcaatc
     1981 actgaaccga acgcatggaa aaccgttttg actataagca ccggttcaaa ggcgacggag
     2041 ccgggtatat agccaaaaac atcggcgatt atgcgttgaa taacaagcgg tgcaaaaaga
     2101 caccggcaat cgactgaaag atacctcagt agcactaaca tcctgtgcag ccgctaatta
     2161 ttcaaccata gttaacaata gcggcttacc ggaggccgct ttttttatgt ctgaaaaatc
     2221 ggtgctgcca ttttggcacc acttgccaaa ttacaggcac aaaaaaaccg cctcgtggcg
     2281 gtcatgttct tttaattatt ttcttatatt acaaggcgtt agcacatggt gcccagagcg
     2341 ggacttgaac ccgcacagcg cgaacgccga gggattttaa aaagttaatg cccgcttttt
     2401 atatcataga gttacgttaa ttcaatacgt tagcagtatt caattcaggt taatgcgagc
     2461 taatgcggaa atctgctgcc atcggtttaa cgtggcagcg ccccatgatt attcatctgt
     2521 ggttaaagaa tcaaacgggt tgagggtcac ggccgcatcc agatgatccg gcgcgaaatg
     2581 cgcataccgc atggtcatag tgatagagct atgaccaagt atctgctgca acaccagaat
     2641 attgccgccg cgcatcatga agtggctggc aaagctgtgc ctgagaacgt gagtcaactg
     2701 cccttctggt aattcaatgt gcgctttctt taaggcgtgc ttaaatgcct catacgctgg
     2761 tttgaagagt tggccgcgcc gtttgggcaa caaggcgtgc attctttcag aaataggaat
     2821 ggttcggttt ttcttccctt tggttttgac gaatgtaatc ctgccgggaa ggatttgcga
     2881 ttgtttcagg gtttgggcct cgccccaacg tgcccccgtc gccaggcaca agcgaacgat
     2941 gataccgaga tctttattct ctgattcatc gcaggcagca agcaggcgct taatttcatc
     3001 cgggtagaga aaagccagtt cctgatcgcc ttccttaaac tggcgtatgc catccagtgg
     3061 gttttctttt tcccactccc ccatgcgctt cagctcagaa aacaccgccc gcaggtagga
     3121 atattcgcgg ttcaccgtgg cctctttgat agccgtcttc ccttttgggt tccattcgcc
     3181 ttttaaccgg cgctcgcggt aaacagcgaa catatttttg tcaacgtcta tcgcaaaggg
     3241 attacccaac cgctcacaga tcgccatcag tttagagtaa cggtcttcac ctgactccag
     3301 cgtctggccg tgcatgtcgt accagcgctg gatcaggtct tgcagcgttg tgctattggt
     3361 ttcggtcgat atcccttttt tatccgccat caggcggcgt tcatacgcga gtgcctcacc
     3421 tctggtagca aattgtttac gaacgcgctg accatcgcgc ccatagggga agcattggca
     3481 aagccatttg ccggatggaa gtttgtttac agccatgtaa tattatccag taaagctctg
     3541 ccactgttct tcactgatta ttttcagtgg aatgccacga ttatcccggt agtctattgc
     3601 tttttctatt ttccgaccgt gagcctgata tctccaatgt ttacaactca atgtaccaat
     3661 aataagaaaa tcaagttttg ctgttatatt atcaatcacc ttcccgcctg catcttcaat
     3721 cagtttttta cacactgttc tttttccata aaggaattca cctgtcagac aaactgttgc
     3781 attggaaaga actaagctct ctatatcatc cactggtaag cgagttgcca acccatccac
     3841 tacaccggaa tcaacatcac ttccggtaaa agcgattaac gcttttttca attcatcacg
     3901 ttcttctgat gtaatgatcc catcggcaag aatccggtta accaatgcgt ataactcttt
     3961 tccagggtaa ttaactttga gcgaagcatt agatgatagc caccaattta agtatcttat
     4021 ttctgaatca ttaagttcat gattagccat cattccttta cataggcctt ccaataaatg
     4081 cttgtccgct tcatcggagt acaagtcaag ctcaggtaaa tcagacagct ctttttgcac
     4141 cttgattaaa tcagctttca aataattcaa ttcatacggc tcaataacgc catcagacaa
     4201 tatatcggaa agtctatttg aaatcatccg cacacaatag tttttactga ttaaatcagc
     4261 atcttttatc catgtatcaa gaaacaaaac ctctttctca tctatatgac catcacagtt
     4321 tatgccctca atgatattga taaggttaat aagtaattta tctttattcc ttttatagtt
     4381 aaaaaaatct agtttttcat ctgccatgag gttttccttt ggtattaatt tcaaagtcaa
     4441 cttataacta catttccaac cgggaaatca tttactcaaa acaatactga caaatatttc
     4501 taattatcac caaataaatt tacacgcact ggtttttttc cttcatcctt cttccagtag
     4561 tagcctgact gaagtaatga gataagttcg tcctgagtta tttttatcgt atcaaacagg
     4621 tcaattttac ttctatcaat actaggtttg aatatatcca gtgttatttt acccggatca
     4681 taactctgac tttctatcat gattggcagg ttggttaact ttttaggcgt tagttggtga
     4741 tatggaataa aatcacctga aaagaaacca tcaatagttg caactggatc ataaccagaa
     4801 aaacactcat atttgacttg tagtgcaaca gcatctggta tttttagaaa ctcgctccac
     4861 tcactataac ccaatttatc actataaaag acatcacctc taccgaaaga aaaagagtta
     4921 ccttgcgtcc aatcctcgta ttgatattta ttgaagacaa atttagttag ttttatatct
     4981 agtgcatcac ggtgggattc tcttattgca aagcgccaac cagcggcata accatcaaca
     5041 aaacgagcaa taagcgcgga actcctgcgt ggctctctga tagttcgaaa tgttgaagtt
     5101 acctcattgt gcaaaatctc tattttttca tgtatatcct tttcgtcaga ttcataaacc
     5161 tctgtcggtt ctattggaat ctcacctgta tcaacaaatg aaaagaattg atctttggaa
     5221 aggatgaaac agtttttttc atttgcctgt tttattttct tccatccagc attagggcca
     5281 caacacagga aatataattt ggctgtaata ccttttctga ctaacagtcc ttttttttca
     5341 gcgagtgatt ctagttcatc ctttatgtct ttatcaaaac cagtaaagca aatctccaaa
     5401 ccacggggag tatctttcac tcgccgagtt tcaatcttga gatctgctat agctaaagga
     5461 ctagcggcag aaaccatttc ttcatttgaa gagtatacat ctattattct ttcaagtttg
     5521 aaggttctaa agcccttctt gttgatgcaa tacccttgaa gataattatc tttatatact
     5581 gcatcgacaa cgtaattgtt agacacctca ttattagcat tgatataagt aaagaatatt
     5641 tctttctcgg tttttgaaat ccattcttca aatgtcataa aaagcccttc tataaatagc
     5701 tatttgattt atctatcttt agagttgaga tattttttat gttacttatc gatacgtcta
     5761 acgaaaaaaa atagcgccga gaattattcc agcaacaaac acagcactga aaaccaatgg
     5821 ttctgcttta agcacctctt gccagctctg gcgagtgtta ggcgtggttt gaccgggaac
     5881 gctcgaacac tgacgatcat ccaaccatga aagcgcctgc tgaagctggg atcgggtcag
     5941 ttcagttaat cggccagtac cgaaatgaat gtgacagtag tgaattaatt gctgccgctg
     6001 atctacctgc tgggtgttct tcaacagcag atgcacaagc gcattactgg catccttttc
     6061 ccggtatctg tcgcgcaacg cctgaagata actgaccgcc gtttgatact ggttgaccgt
     6121 catatcctca atgcttttga cgccaatttc agcatggacg cgctgccaca ctgaaaaacc
     6181 ttcttcatag ccgccgtcag caatttcttt taccagttgg tttaactgct tacgctgcgc
     6241 gggaaccagt gggcgttttt cttcattggc cgccggaatg gcaatattga tcttatcgac
     6301 cgtgatgctg ctttcgtaaa aatcccgccc ggctacccgg ttttcatttc catgagattc
     6361 aacactcatt cctggagcgt tcccttattt tttgttttcg tgataatccc tgccagcaac
     6421 acgctgacca ctacccgtta cgtttatcga gcctgttgat actgagcttc ctgccgttaa
     6481 tgcggccagt acagcagctt ttactgtaag aggcgcagtc cgatagttac caagcaactg
     6541 ttgttcttca tcagttaacg tggcagcaga acgaacacct gtaacaacgt actgcacatc
     6601 aacaccgatt tttgatacag cattcagata tgccgcatct ggcatcctgt cgcctttttc
     6661 ataattcaac tgggttagtt tttttactcc cccaatatct cccatcgcta cttggctaag
     6721 gccgaggcgt tcacgctcct ctcgcaagcg agtgccgata taattttcca taccaaatct
     6781 cttgactggt atattttttt ataccaaaat gattttcaca ggctaacagt ggatcacaac
     6841 ataccattat gacacaagaa aatcatgatc agcggtcgcg tctgccgcgg gggattgcat
     6901 cgcgcaaccc tacccccatg aggctttccg aagatgaacg cgccaggcta gcagcgttgg
     6961 ctgaaaaaga aagccgttca ctctccagca tggcgagact ggtttttctc cgggggctgg
     7021 agtcttttaa cgctgaagga taagcgccat gagtaaagcg ttaaccatca atatcaccat
     7081 cccaacggca tatgtttctc tcaggaaata ctcagaatta acgggtatcc cctttgaaac
     7141 ctgccggggc atggtaaaaa gcgggaaaat cattatccgg ccaaaagaaa aagcaaacga
     7201 gaaagtagag gtgaatctcg ttgccatgct gcgcgatgcc attgccagca gtgaaatata
     7261 aaggagccac atggagaata aaaaatcagg ccgccaatac gcaattacac aattaagtaa
     7321 gcacacaaac gtatatcggg gcttctcaat tattaaatgt ccgcgaacga tatcaaatcc
     7381 gattacccga tatcgtgtta gtcagtctgg gcagtcttac ggtttatttg atgcactgac
     7441 attagccacc ggttatatcg ataaccttta cacagcgagg cgataatatg atttccatag
     7501 ctcgtctatt aacttctcag tcaccatcac cagtaatccc taatcagggt aaaggctggc
     7561 tggaactgcc aaacggccag cgcgttaagc cgtccgttaa tcaggtctat ttcgcaccct
     7621 ggagccaaaa gccctacatg ccagcgccta agcaaaagcg ccgctggttt tcccgtctca
     7681 tgggtattgc ggcgtagcgt catggctaat accgaacccg ctcgcgccat tccgctgagt
     7741 atcgcggaaa gaacagacgg gctaaaccac atagccatgc tgcgagggaa acacttcaag
     7801 acaaacagtg agaaagaaat gtgccgcttt attgatgata tgcgggacaa gattgatgac
     7861 gattaccata agaatatgcg cgtactgtcg gcaatatttg aattagcgga tattgataag
     7921 gagcggcatc acttgaaatt taatgaactg acaactgacg aaaaagaaag gctgattaaa
     7981 gcaatgaata agctccgcgc agttgtgagt ttattcccca aaaacttaat tcttccactg
     8041 taataaaaaa accaatttta ggcgtaaacc cgccgggctt tctattacct aaaaaaagga
     8101 aaccacaatg aaaaatgccg aagtaaaaac catgactgtc gccaatgatg gcgcattggt
     8161 cgagctgctg aaaaaggcca gactggagga acgcaaagat cagcattttt ccttctcatt
     8221 gcgccttgct gcgctggctg tccgcgctca acaacgcgac ctttccgccg ccgaaatggt
     8281 ggaattgata cgccaggagt ccgaacgttt tgagcgctcc gctcaggagc tgagctgatg
     8341 gactcgattg acatggctca ggagcgcgaa gcgttcatcc gcgaaacaca aatccagaag
     8401 gcccggcaac agtcgggctg tgccgtttct gcattcgtct gtgaaagctg tgatgcacct
     8461 atccccgaag cccgccgcgt ggccgttccg ggtgtgcgtc tgtgcgtgta ctgccagggc
     8521 gatgcagaac tgaaaaacaa acactatcgg ggtgcgttat gagcattatt gccacaccgc
     8581 tgaaatgggt cggcagcaag gcccgcataa tggatatcct gcgcgagcat ttaccggctg
     8641 gtgatcgtct ggttgagccg ttcgccgggt cgtgttcggt catgatgaat accgattacc
     8701 cggaatacct gatcgctgat atcaaccctg acctgattaa cctgtatcag gtcatcaaag
     8761 aggatttgaa ggagtttatt gatactgccg aaggtctgtt tcgcactgcg aatacagcag
     8821 aaagttatta ccgtttccgt caggtattta accgcagcaa agagaatcgc accacctcag
     8881 cagcactgtt tctttatctg aaccgacacg gttaccgggg cgtttgtcgc tataaccgcg
     8941 ccggtgggtt taacgttcct tacgggcatt atgcatcgcc ttattttcca ttggccgaga
     9001 ttcaggcatt tgccgaaaaa gcccgccatg caaaattcat ctgcgccgca tttggcgaaa
     9061 cattgcaact gagccgcccc ggcgatgtgg tgtactgcga tccgccgtat atcccgcaaa
     9121 cgccaacggc cagcttcacc agttatcaca ctgatggttt cacccacaac gatcagtatg
     9181 acttgtgctg cgcgttatca cgcctggccg agcgcgggat ccctgtcatc gcatcaaaca
     9241 gcgacactca ccacgcacac agcctttacc acaggtttga tatctgccgt ttcaccgcgc
     9301 cgcgtagcgt cggtgttgcg gctggtgaga gcaagcaggc cggggaaatc attgctaagc
     9361 gtctgccgat tcctgctgcc cgaagcctgt cgaaagtttg cgacgggtgc ggctatgaag
     9421 gtggtgggca ctgccctgac tatgggccag ttatgggtga tgccacctat caggaaatgg
     9481 tggcatccgg cgcgttgaac gcggagccgt tctgaatgcc tgaacagtgg gcatgacatt
     9541 ctatcttgcg aggaattatg ccgtatcaaa tgagtaatga aaccagaatg ctcgttctgg
     9601 ccgtgatcaa acattcacaa aaaagcactc ctgcggatgc tatcgatgag ttgaagaggc
     9661 tttatcaatg tacctctgac tcacaaacac agaatcatag ccccttaggc caaagtcata
     9721 ttccgatgca tctacaagat ccagagaccg gagaaattca catgcttcaa cgtattcacc
     9781 tagtccatca caagtgatct cacggtaaaa aacattttca ttacatatta gtatcttata
     9841 aggaattaat ggcgaagttt taggctgaaa ttcaagccat ttggttatcg cttcatcgta
     9901 agacggaagg gcgagctctt ttttcacctt gaaatactta tgttccatat gagggccttg
     9961 ttgtgtcaga aagacttcag aaggtgatgt tataaatgtt cagagagtct aagggaaggc
    10021 actcatccac acttcagtta tgtgcaggaa atgagtcaag ccatgaatgg gcctatccct
    10081 ggaacgctcc acgccctgcg atctccgcac cgtcgggcgt gactgatctc cgtccctctc
    10141 tattcgttac ggatgcggaa ccgcacccca ccgtcacacg gcatctgagc cggatggtta
    10201 aacgcgcttt ggcagcgcca ggtgatgacc ggaatcttaa tcaagtcgta gcacagttgg
    10261 agcaccggga gccgaacggc acccagttgc ttatccgtcg cggtctggcg gaaatagtac
    10321 gccgggatca tcagaaaacg ctaagtgact ggatgaaaac accggaaggc gtggaagccc
    10381 gcttgcacga acaaccgttt tttatccgtg acgtttaccg ccaaaaaatc gaatggctac
    10441 gagcgaaccg cgagccgcga cacatcagcg cctttttcat gggaaccgtg aaaaaagccc
    10501 tgatgcgtct ggatgctgtg cgtatgcagc aaggtgtgcg taatggcttt gcatcggaac
    10561 tggcggccta ttgggggccg cgttgggtgc atctggccgg gtttaccaag catgaggtga
    10621 tcaatgccgc gcataccctt gcggccgcca tcgccgaaat gtttgaaacc gagtgcggcc
    10681 acacatcgcc ggaaaacatg accgacaatg aaattcagtg gctgtatcgc catctggggc
    10741 gcgaactgct ggcattacgt gtaacgccac cgtgctgggg gctggtcatc ggtgatgaac
    10801 aagcccggca ccgcatctat tccgccattt tacgcattac ttcacctgaa tggtgggggc
    10861 ggaaactgtg gcgactgcgt tgtgaatggc gggaaaatca gtttcgcgcc atcggcgtga
    10921 tccacaaaaa acgaatgccg tatgtcagcc ttgatgccct caaccagtgg caagagcagc
    10981 gccgcaagaa tctcgctttt ttccagacac atgaactggt tgatgaagat ggcaacatcg
    11041 catcactgga aaacatggtg tacggcagta tcagtaatcc ggctatccgc cgtcatgagc
    11101 tgatgacccg tatggccggt gttgaaatgg tggcaatcgc gcggggtgat gaaggcgttt
    11161 ttctcactat cacctgcccg tcgcgttacc acgctaacat cctgaacggt caccaaaacc
    11221 ctaagtggga tcatacctct ccacgtcagg ggcagcggta tttatgccgc acctgggcgc
    11281 gtgccatgtc tgcgttgaat cgtcgtggct tgcgccctta cggctttcgc gttgccgagc
    11341 cgcaccacga tgcaacaccg cactggcatg tgttgctgtt tatgccacct gccgacagaa
    11401 aggccatcac cgatatcttg cgagagtatt ttattgctga agaccgtgcg gagctggggc
    11461 gcaacaccgg cgcacgattc aaggctaaaa tgctcgatcc aagaaaaggc agcgctacgg
    11521 cttacgtggc gaagtacatc agtaagaata tcgacggtta cgcgctggat ggcgagctgg
    11581 ataacgaaac cggcaagcca ttacgcgaaa cagcaaagtt tgcaatggcc tgggcatcac
    11641 agcataacat ccgacagttt cagccgttcg gtctaccgcc ggtaacggta tggcgtgaac
    11701 tgcgtcgcct ggcaaaccaa cttaccgcag tccagaaaga aaacggcacg tttaaacgcg
    11761 gggccgcaca gcttgctgac ccggcaatgg atgccgtgct ggcatcggct gacgccggtt
    11821 gttttgccac atacatcgaa aagcaaggag gcgtgttgat cccacgcgag cgctacaccg
    11881 tgcgcattgc ctatgaagac gctgacgaac aaaacaccta cggcgagaca ccggaaaaaa
    11941 tcttcggtgt gttctctcca cgtctggggg cgatatcccg tatctgcacc cggttaatca
    12001 aatggaaaat ccgcaagaag cagtccgctg acgatggtgc cagcattggc accgggagtg
    12061 gtttggccgt tacgtcgcca accggcgacg cttggagttc tgtcaataac tctacgggcg
    12121 atgaaaaaac atccattcca acgggtatag acggggatga ctatggtagc tgtgaactgc
    12181 cagatggaga gcctggcgat acacccgctc aaaccttcgc cgacttcgag cgcatgacag
    12241 acccggaacg ccgggcgctg ctgtcaaggt tgcgaactca accgccagat cggcggaata
    12301 accaacactc gtccactact caacggaaca aatcggctga aaaacaggtg gttggcaaac
    12361 tgtcggacga gtggcgtgcc agtattgccg atttcgcccg ctcaatcggc tgggatatta
    12421 gcaatatcga gatccagcgg ctggcgttgg ggcatactct cacctttgcg gatcagctat
    12481 acgtttcacg ctctgacgga tgcctgtatc gcgttcggcg agaacgtcga ccggaagatg
    12541 ttgccgctac tgtaagcaac tggatagcac ggctgcggat ggaggggtat caggaagaat
    12601 gatagattgt catatactat tatgacttca taatttgact tcatttatgg cgggttggat
    12661 aatgacttca tagagtgatg tcgtgaggcg agggaatgaa ggaacaggtt tcatcattac
    12721 ggaaaaggca aagaagcacg cttgaacagg tgtttaaatc ccctgtccag tcaggtatca
    12781 aatgggccga tatagagtca ctgataaagg ctctgggtgg ggaagttaaa gaggggcgtg
    12841 gttcgcgttg taagtttctc ctcaacggca gtatcgctaa cttccatcgc ccacatcctt
    12901 caccagatac agataaaggc gcagtggcta acctgcgcga ctggcttgaa agcataggag
    12961 tgaaaccatg agcaaaccat ctacaccaaa caccattgag atagccggac aaccggctgt
    13021 tatcagctat gtgccggagc ttggcacgtt tcgtggtaag tttatgggtc tgaccggcta
    13081 ttgtgatttt gtttcggaca gcattcaggg actgaaaaaa gaaggtgaga tttcactgcg
    13141 tgaatatctg gatgattgca gcgcagcggg cattgaacca tacgtccgtc aggaaagggt
    13201 taaaacgttt acgttacgct accctgagtc tttcggagag cgtttgaatc aggctgcagc
    13261 tgagcaagaa acatctgtca acgccttcat catcgagacg ctaaacgaga gaatgaaaca
    13321 tgcgtgacag tagtttcaac cgttgatgtt ccggcccgca aattctggcg ggctttttct
    13381 tatgccataa aattcagtta ttgaagagtc taatcactga acgatacgga tgtcggcctg
    13441 ttttcgtaat accttgccaa actaaacgca acactttcta tgcttaaatt ttagttgcct
    13501 aaatcgatac aatgtaatat taataagttg agggctatag gcagattttt tatcacgaag
    13561 cgtgatatgt gaaaagaatg tccggcggaa tgccatcaat gttttaagat caccgataac
    13621 agtttgccgg tgagcttaat gagtgcctat agcacctcaa ctcactattg taaaaaataa
    13681 aaccaaaact atgtcgaaaa acaataaact ttcagaacta aaatcagcaa aaaatataac
    13741 agacttagca aaaattattt cagtccctcg tcagtcaatt acttatgttc tgtatggcat
    13801 aaataggctg aatttagcca agtatcatac ttttaagata cctaaaaaag atggctccga
    13861 aagaacaatt aatgcgccag tcaaagaatt aaaagacatt caaaagaaag tgtcatctct
    13921 attacaggaa tgttttagga ttgtttgtat tctggaagga catagaaatc atcttaagaa
    13981 aattaattct ctttcacatg gatttattaa agggaaatca ataataacca atgctactcc
    14041 acataaaaat aaaagatttg ttctcaatgt tgatttgaaa gatttcttcg gacagatcca
    14101 ttatgggaga gtttatggct tttttaaaaa caacaagcac ttccaattat cagacgaagt
    14161 tgctaaagta ttagcaaata ttacttgcta tcagcaagga ttaccacaag gagcgccaac
    14221 ttctccagtg atatcaaatt taattgctgg aatattagat ataaaacttg cgtcacttgc
    14281 aaaaaaatat agttgttatt acacacgcta tgctgatgat cttacatttt caaccaactt
    14341 aaaagaattt ccaccaagaa tagcatccat tgaaaatgga gacgtaagga ttgggagttc
    14401 tcttgaagga ataattaaaa agtgtggttt tgatataaat cacaaaaaaa atagacttca
    14461 gttctgcaac tccagacagg acgtaaccgg tattgtcgta aataaaaagg tcaatgtgcc
    14521 ctacgattat agaaacaagg ctcgtgttat atggcataaa cttaaaaatg gaaaagaaat
    14581 ctatgctata aattcccagc cagaaattaa aaaagatatt aactatctga ttggtatttt
    14641 aagccacata cacaacgtaa gacgtgagca tagagtcaca acaaaagaag aatatatcat
    14701 tcccaagaaa cctaacaaaa aaacatttga tgatatattc gatgctgata gcagaatgta
    14761 tagagatgtc cttttcttca aaaatttcgt aaaaaataaa aaaccggtca ttgtctgtga
    14821 aggtaaaact gatataactt acctacaatg tgcacttgag tcacaggcag caaaacaccg
    14881 ctctctaatt ataaaaaaag aactgcaaat tagtttcttt agaccgacaa aaacaataag
    14941 tgaattattt aaagtgacag gtggtacagg agatataggc aatttgataa gctgataagc
    15001 aattattcaa gttactgcga tgaatttaat agattttctc tgtcccaacc cgtgataata
    15061 ttaattgata atgactctgg tgctcctgca gttagatcct tagttaatca aattacaaag
    15121 aaaaacttct ctagcaatga tagcttcact cacgtcataa aaaaccttta cgttatgcaa
    15181 actcctttaa ttaaaggggg ggatagtgcc atcgaggatt tctttgatac tgcaacatta
    15241 aacgaaaaat tagagaaaaa aacctttagc tataagggta cctttgacac tgacaaacac
    15301 tacggtaaga atcattttgc tgagtatgta gttaaaccta aaagaaaaac aatagatttt
    15361 accggattta acgttctatt aaacgacatc aagaaaatta taaaagacta caaagcaaaa
    15421 aaacattaaa tgactttttg aattaaggtt tttaactaaa aaataatttc atgcaacggt
    15481 tcaaaatcat tacgcacaag attgatggaa actggtgtcg ctgattgacc tgaccgtatt
    15541 gaccgctgcg tagcgagtaa cccggaattt aagagccgct cagggttcct tgctcgggca
    15601 gcattagagc ggatttcatc cattcgctaa ccttctctga aacctgcttc ggcaggtttt
    15661 ttttacccca aatgcgccgc acaaacccgc acaattttgc acaacttttt tgatgctgtt
    15721 ttaccccttt ccgcccggta cgcgtgcgcg ccgggccggt ttctgcactt gcacaaaaaa
    15781 tgaagcgaga gcagcgcgca ggtgacgggg gaacagcccc cgcgatgggg ggtaggtagg
    15841 gatcgccttt gatgtgccaa atctggcaca tttcccggac tgctgcgtgc gtattttcgt
    15901 tcgggagacg cgacgcggca tccggtgaga gcgcccgatg gcgtagcgct gatgcggttt
    15961 tatgtgggtg ggaaatggtg gcgttagccg ttgatctgaa aagaaattgt gtgcggtcag
    16021 cgtgaaagtt tttgaataaa aaccgccgcg tgagtgcgac ggcagtggcg ggatatcact
    16081 cggttttcaa cagggcgtaa ggattaaagc ggatcacctc catccctagc cagtcattca
    16141 catgcttaag cgcttccatc accggcatca gttcgttgat agcgaacacc cgcgcggctt
    16201 tctccacatc gccaaaggag ccgttgcctt ccggcatggc gcccatcagt tgcggcggca
    16261 cacggtgcgc cgcgaggatg tcatcacgcg tcaccgattt gatattcagg aattcatctt
    16321 tggcagatat ctggctgaag ggaataatct gtaccccttt ttcaccgccg cccggcgcat
    16381 gtaacagcag gtttttaaac gcgcctttac cgcgcgcttc cttcagcgtt ttcttcacgt
    16441 tatccatgct ttcggtatcc acctgggatg cgccgatgta gataatgcac ccggcgtgcg
    16501 aaccgttgtc atagtagagc ttgcggaaca tatcggcaga gtgtgacagg ctggccgaca
    16561 gcagcgcgcc catgtattcc ggcataccgt atatctcctg gtgaatatcc gggttgatga
    16621 cgtggcacac gctgtcggta gcaaacgtgt gttcatcctt ccactgccgg ataaaccaat
    16681 aggtattcag atcgctgccg cgccgggtgt acttggctgg aacgtgacgc agggccagca
    16741 ggccgcccag ccggttgacc cggcgttcaa ggtaaccgtt gccgaaaaca aaccagtcga
    16801 gcacgaaggc ggagaacgcc tgacgagaca atagcgggtg cgggataaag cacccggtca
    16861 gcgcattgcg tttgaagtac agcgcggact ggtgccatga cgcactacca aacgcgcgag
    16921 ccagcccgta ccagtccacc ggggtgtcgt aataacggcc attgtcggcg caatacatgt
    16981 tatccagcag atcatggcca tccctgaccg gataggggcc gtcaaaggta aacgcgctca
    17041 gccccggatc gcttttcagg gccgccgcca tatccggctg actggcggta accgcccggt
    17101 gtgtgccggt tttatctttt cttttcatca gaactccatc gcaaagccac caccgccctg
    17161 ctcctggccg agtggttcat tgatgacggc cagcatggtt gcccaggcca gatcgccatg
    17221 attagagccg cgtgcgcggt cggtgtcgta agtcatgatg ccgcccggcg tcttgacgcg
    17281 ccgcacggcg ttgaacgcat tgatcagcgc ctgctcgctg cggtcgtatt cccagcgacc
    17341 ggcacggatc acctgaagca ttttcagcac taaggcgcgt ttggatgaca ccgacatcag
    17401 gaagcacacc gccgccggga agaatttctt cacaatctgg tagaccgctt caccgatgcc
    17461 ggtaccatca atggcgatat gctgcacgtt gtatttgaag gtcagcgctt cgatcacttt
    17521 cgcctgttct tcaaactcca ggccgcgtat ctgctgggtt tcgatggtgc ggaatttgcc
    17581 gcccgccacc agtggcggta ccaccaccga gatcgccccg ctgtcgccgt tgccgctgct
    17641 gccgttggcg tcatagccaa tccagatgcc gcgatcggcc attgggcgcg atgcaaaggg
    17701 cttccagtcc ggccactcgt cgtaaccgtc ggcgccgcag ctaaataaca ggttgaggtt
    17761 aaaggcggac tcaccatcgc ggacgaactc acagccgtac aggttgttgt attcatccgg
    17821 gctgttttcg tcgcggatct cctccaggtc ggtgtattgc cagccgtgat cgatgacgtc
    17881 ctgtagcgtc acaatctgac gccaggtttt atccgggcat agcaaaccgc tattgagcgc
    17941 tttccatgac acatcaaacg cgaccttttg caccttgctg cgcttctcat tccagcgtgc
    18001 gcccgtccag aacgggtacg cttcatgggt ttcactcgac ggggtggaaa agtaggtgcg
    18061 cgtcagccct ttcagggtcg ccatcgcccc ggccaccttg cgcaagttgg caaagttact
    18121 gacccagaaa aattcatcga aatacaggtt gccggtgtag gactgcgccg tcgcggcaga
    18181 cgtccccaga aaatgcagct cggccccgtt gctcaggact atcttgtcgc cgccttttag
    18241 ttcgacgtcc acctcttccg ccaccttctg gataaagccc cggaactggt gcgcctgacg
    18301 gcgcgaggca gaaagaaaaa tctggtggcg ctgataaggg taagccacgt catcacgcag
    18361 cgcccgcaat aacgcttcac gggcaaagta ccaggtggcg ccgatctggc gggactttag
    18421 gatcatacgg ttgcgttgat cctgctgggc ataccagccg ttttgatgcc aggccagtga
    18481 gtcgagaatg ttggttcgca acgcggcaat ctgttcgtca gtgaagtgat ttttcacctt
    18541 gcgcttgcgg ggtttcttgc cgcttgcggc attgcccggc tggccgtcat tcagcgtttt
    18601 caactgccgg gtcagcgcgt ccatttcctt caggtcgcca ccggttttgg ttggcttctg
    18661 ggccaactgg cacaaccgtg catcgataga atgcgttacg cgctggatag gcggcgtctc
    18721 gtcccattcg tcgcgctttt tccaggcgta caccgtgttt tgattaatcc ccatcaggcg
    18781 cgaaatttcc gctggcgggt agccctgcca gtaaagctgt cttgctcgct gccgtacaaa
    18841 tgcgtcctga atcatgcgcg gtttcccccc tttgccggga agattacccc gcgcgcgatc
    18901 cgcctttcgc tcactttcgg ctctggccct ccgccgacaa caaaacctcg ttgagacagg
    18961 gagttaggct ttgcaatcat gatgtcacag acaccacagg acaggactac aggcatgagc
    19021 ggtaccacca aaccgacccg taaaaaattc cgggttgccg tctccggctc caccgttgac
    19081 gggcgtgaaa tcggacgtga ccacctctat gcaatggcgg aaagctacaa cccgcaggta
    19141 tacggcgccc gcgttaacgt tgagcacatt ctttcgccct atccgggcag tgacttcagt
    19201 gcgatgggcg atgtggtcgc gctgagcgcg gaagacatta ccgacggccc gctaaaaggc
    19261 cgcgccgcgt tgtatgcgga aatcgaaccc accgagcgaa tgaagcagct caccggggaa
    19321 gggaagaaga tttattccag tatcgaaatc gatccgcagt ttgccgcgac cggcaggcca
    19381 tatctgcgcg gtctggcgat gacggatacc ccggccagcc tgggcactga gcgtctgaaa
    19441 ttcgcggcac agcagcgggc gcaggtacag gcattcaaca atctgcccgg tgagccggtc
    19501 atgttcaccg aagcgatgga agcggagctg gtcgaactgt ccgaacagcg cagcgacgag
    19561 gggaagcaat ggttttcccg cgtgatgggg attatcggca aaggccgcaa gtcagacggt
    19621 gaacagtttt cccaggtacg cgaagcggtg gagaacgtcg cccagtccca tgctgacctg
    19681 ctggacaatt tcaacgcgct gaaaaaccaa cagcagcagg acagccgcac catccagacg
    19741 ctgaccagcg agctggccgc gctcacgcaa aagctggcga cgcaggataa cagctacagc
    19801 cagcgtccgg cggccagcgg tggtaacagc ggcgcgcaac tggctgactt ttaagtaccg
    19861 ttaagcgaga caagcgaaca tggaaaattc tacccgtaat ctttataacc agtacatttc
    19921 ccgtcaggcg cagcttaacg gggtgcagcc gaatgacgtg gcgatgacct tcagcgtcga
    19981 accggctgcc cagcagcgca tggagcaagc ggcgcaggaa agcgatgaat tcctgaaaca
    20041 aattaacgtg tttggggtta aagcccagga aggccagaag atcctgatcg gcagcaaggg
    20101 accgatcgcc agtaccaaca acagcagcga cggcacgtcc cgccgtaacc cgaccgacaa
    20161 ccattccaaa gagccgaaca cctaccattg ccgcaaggtg aattatgact cggcgatcag
    20221 ttacccgcag ttggatgcct gggcgacgca gccgaacttt caggcgctga tcagtcaggc
    20281 caatgcgcgg caaatcggcc tcgaccgcat catgattggt ttcaacggca tcacctatgc
    20341 cgagaagtcc aaccgcagcg ccaatccgtt gttgcaggat tgcggtgtcg gctggttgca
    20401 aaaaactcgc aacgatgcgg ggcaccgcat tatcaaaaac gtcacgctga ccgcccgcga
    20461 cgaagacaac aagattattg ccaaaggcac ctacggcaac ctcgacaccg ctgtgtttga
    20521 cgccaaaaac agcctgctgg atccgtggca ccgcaaggcg ccggatttgg tggtgatcat
    20581 ggcgtccgac ctgctgacgt ccagcaactt tccgcgcctc aatgcgctga gccagagcaa
    20641 ccccaatacc gagttgctgg ccggtcagtt gattgtcagt caggagcgtg tgggcggcct
    20701 gccgaccttt ctggcgcctt acttcccgtc caatgcggtg ctgatcacct cgttcaaaaa
    20761 tctgtcggtt tactaccaac tgggggcgct gcgccgcagc attgctgaag agccggagta
    20821 caaccggata gccacctacc agtcgtccaa cgatgacttt gtggtggaag actacggcaa
    20881 ggtggccttg atcgatggca ttcagtttgc gcaggccgca ggcgacggcc agtaacagcc
    20941 cggcggggta acactccgcc caaccggaga acacaccatg ctgacaccgg cacaacgaca
    21001 ttttcagcgg gtcatggccg aacgccgggg ccaggcggac accgaaacgg aggtgtcacg
    21061 cacggcccat gagcaaatcc ttcaccgctt gcgcctgcat caggccgcgc tgaaacaggt
    21121 gcaatctgcc gccaccaaag cggagatgaa aaaagccatg ctgccggaat acgacggctg
    21181 gattgatggc acgctggaag gcgacagcgg acgacaggat gaggtgatcg tcaccctgat
    21241 ggtgtgggcg atcgactgcc aagatagcgc actgacactg aggctggggc gttacgtcgt
    21301 taagcatggc ctgtctttgc ctgccgacaa gttccgccgc gatgcggtaa cggtactggc
    21361 tgaggaagtg agcaacccgg tactgacact ggccgccacc gacgaccgcg ctgacctgag
    21421 cggttacacc gccgtgctgg atgaagtggc cgcgattgtg gacggcaaag acatgccgga
    21481 cgaagtgcgc gccaagctgt gtaaagcccg cgccttctca cgccgtgcgg cagtggatgc
    21541 acaaaccaaa gctgaggcgt tgaaactgtt tcgggaagcg atggcccgca atccgaacgc
    21601 gggggtgaaa cgggatatcg ccacgctgac gcgggagctg aaaaagctca tgccggccag
    21661 cagtgacgaa ccggaagacg gcgcgcccgg cgacgatgga gcagccactg agccgcctgt
    21721 cggagagacg acgccggcga cgaccccgac cgatgccgca cagccagcgg caaagccagc
    21781 cgccgtgcgt aacaccacgg cgcggaaaac cacacggacg acgggtaaaa gcaaagccgc
    21841 ccgtcagtct gccaaacgtt aacgacttcg gccccgtccg acaggcggcg cgccgggtga
    21901 tctgcccgta tgcggtcttt ttgcccggcg cccaccgcct gacttttggg agagttgagc
    21961 atgagcctgg tggcttcgaa acgtgttagt gacagcggcg acgtgccgga gattgacgac
    22021 ggcgcggcag cagtcagcgc cggggatttc tggccggtga tcgtcctgcg cgatctgcgc
    22081 ctggccgccc gcatcaccgg cggtatcacc accacccgcc tgatgcacgt caccactgaa
    22141 gcggtggtgc atgtgactga ccagctggcg agctggcagc agacacaaca ggccgccgga
    22201 tatgccgcac tggcggacgt cccggccgga caggtcaacg gcgaaagcat caaggtgtac
    22261 cgcttcaagc gtgcggttta tgccatcgcc cgcgccttgc tgctggaggg ataccgcgat
    22321 gtggatacca cggccaaagg cgacaaggca acggacactt ttgacagcca gcgtgacgat
    22381 ttgtggcgtg atgcgcgctg gagcatcgcc gatatacgcg gcgcccagcg cctttttgcg
    22441 gagttgtgct gatggtggtc cgggcgcttc agggcgatac ggtggacttg ctctgttatc
    22501 gccattacgg cacatccgcc ggcgtcaccg agcaggtgat cgccgccaat ccggggttaa
    22561 gccgccagat gtttctgacg gccgggcagg ctatcacgct gcctgatatt ccccgtcaga
    22621 cagaacagga aacggtgcag ttatgggatt aaacgatctt cagcgcctca atgatggggt
    22681 gacctatggc ctgtccgtga tggtgaccgg catcggggtg atgaccgtca gtgaaaaagt
    22741 cgcgctggcg ggcctggtca tcggtgttgt caccgcatgg cgcgcctggt tgttccggcg
    22801 tcgtattgag cgcgcacaac gacgccgcaa tgaactgatt gaacagattt tacagcagtc
    22861 cgagcgccgc acgctgaata cgtcggaacg ccgtgcggtg gccattttgc atcagggtga
    22921 cgttgacgat gaaaaccgcg attaaacgct gttcgattgc gctgattgtg gcgctcggcg
    22981 tcacgctgtc ccccggcaca ctgcgcacgt cgccggaagc acagcagaaa acggccagtt
    23041 gggaagactg ccgggcgtcg ccgtattact gccccgccgg agtgctgacg gtgggcattg
    23101 gctctaccgg taacgtgcaa aatcggccgt acagcaatga cgagatcgca cgccgctggg
    23161 ttaacgacat gcagcgggca gagaactgcg tcaacggcaa ttttaacggc gctgccatgc
    23221 ctcaatcggc gtttgaagcc atgaccgaca cggcgtttaa cctcggttgc agcggcctga
    23281 tgtggtttac caaccggcag ggcagcaagc agcgcaccac catctggaaa catgcgcagg
    23341 cgcatgaatg gcccgcgatg tgtgagcggc tgaccgactt tgtcaacagc ggcggccagc
    23401 gctccgccgg tctggtcaat cgtcgcagcg actttaaagc ctggtgcctg cgtgatctgg
    23461 cgggtgtgcc atgaaactgg ccgccaccct tgccgtgctg ctggtgctgg ccgtcggtgg
    23521 tgtgctctgg caaacctacc agcgcggcat cgactgggcg cataccgagg cactgacaga
    23581 cagcgcccaa caacagcgcg agctgttaac cgaattccgg gcactggccg acgatgccag
    23641 aaacgtgctg gcgcaggtgc gcgagcgcga gcaacagcgt tatgccgagg gggaagaacg
    23701 ccgtgaaaag atgcgtgagg ggatgcagcc cgatacgtgc gctaacactg tggtgcctgt
    23761 tgctgtcagc gacagcctgc aaaaacgcgc cgccgtcgtc cagcgtgcag atactgcacg
    23821 acccggtacc acccagcctg acggcaccca caccgacgcc cgtactgaaa acaccggtga
    23881 cctggggcgc ggtcgcgctc tggagtgatc agctgttgga tgcgctggac acctgcaatg
    23941 cagacaaggc cgccatcaac gatgtatacc tgcgtcgcct tcagcgtctg aaggatgccg
    24001 ccgccacacc ataggggaat gctcatgctg aaaaccgatt cgctgcgtga tgcgctgacg
    24061 gcatccaatg tctggtgccg ggccaacccg gaagccttca cggtatttgt ggaagaaggc
    24121 ggtattgaaa ccaccgggga aacgccgtcg tttctgtacc gctactcgct ggtgctgttc
    24181 gtgatgaact tcaccggtga tatcgacgat ttcaccttac cgttaatggc ctggctatgg
    24241 cagaaccagc ccgacctgtt gctgaacccg caaaagaacc gcgaggtgaa attcaccacg
    24301 ctgatcaaca acgacgacag cgctgacatt ctgtttgaaa ttccggtgcg cgagcgggtc
    24361 agggtcacgc gggacgataa cggcatcctg cgtgctgaac atctgcctga acctcgtccg
    24421 cgcctcaccg gcggggtatg ggatgcggtg cttgacgatg ccaccgggga gacagcgaca
    24481 tgacggataa actgtttcac gcactggatc aggtgtttga cgacatcctt tcaggtctgt
    24541 cacccgccgg gcggctgaaa acagcccgtc aggtcgggca ggcgctgcga cgcagtcagc
    24601 agcagcgcat cagggcgcag aggaacccgg acggctcggc ctatgcaacc cgccgccgca
    24661 aggtgttgcg ctcgcagcag ggaatgattt ttgtctggga aggccaggtg cgccacctga
    24721 aaaactggca cggcggccgg ggaaaatacg gccgcacaat caccggcttt gatgaagacc
    24781 gcaatgccat ccgcacgttt taccgcagcg atattgagcg ttatatcgag atcaacacgc
    24841 aggcggtgcg ccgcacgacc agcaagaaag ccccgatgtt tcaacgcctg cgcggctacc
    24901 gttttctcaa aatgcgggcc gataccgacg gggccagcgt cggttttgac ggcatggctg
    24961 cccgtatcgc ccgcgtgcat cagtacggcg agcgtgacaa ggtcgggtcg ggtgcctttg
    25021 cccgctatcc ggtgcgtgaa ctgctgggga tctccccgac tgacgaacgg ctgatccagg
    25081 atacggtaat caacagtctg gggagtgctg ccacatgagc gccgaactga tgcgattact
    25141 ggaaaacgtg ttgcgcgtcg gcgtcgtcac ggcggttgac ccggaaagct ggcgggtacg
    25201 tgttaagagc ggtgaattgc tcaccgactg gctgcgctgg aacaccacgc gcgccggggc
    25261 gtttaacgtc tggatcccgc ccgccgtcgg ggaacaggtg tggctgggct gccttggcgg
    25321 taatccggaa accgccgtga tcatcggcag tctgttcagc gaggcccacc cggcaccggg
    25381 caacagcctg aaggagattg tgatcaccgc gccggacggt gcccggtttc ggtatgacgc
    25441 tgtggctggt gcgctggaag ccaccggcat gaaaaccgtc aacgtggtgg cctcggtcag
    25501 cgtcacgctg aacacgccgg tggtggaatg tacccagcac ctgaaggccc gcacggtgga
    25561 gatcacccac ggcggcaccc tggccggtaa tgtggtgcac tccggcggcg ccctgacctc
    25621 taacggcgtc caggtggata gccaccgcca cggcggcatt cagcccggcg gtagctggac
    25681 gagtggcaca caatgaccgc gacctatacc ggcatgaatc cgcatggcac cggcaccctg
    25741 accgatgccg atcagctctg gcagtcggtg cgcgacattc tgactacgcc gctggcatcc
    25801 agggtgatgc gccgggatta cggcagcctg atccctgacc tgctggatgc gccgcagaac
    25861 gccgttacgc ggcttcagtt gatgagtgcg gccgttattg ccctgacgcg ctgggagccg
    25921 cgtatctcgc tgaatgccgt cgatattcgc tattcagcat cgggagcggt agacgtggcg
    25981 ttatcggggt tgattaccga aacgatgcag gcggccaacg ctgccattac gctcaggagt
    26041 gacagtgatg gcaacggttg atttatcaca gttaccccag ccgcaaatca ttgaagtgct
    26101 ggacttcgaa gtcatccttc aggacgtgaa ggcggtgatg attgccgcct ttccggccgc
    26161 tcagcaggcg tcagtgactg ctgcgctggc gctggaatcc gaaccgttag cagtgatagc
    26221 gcaggtgatc gcctaccggg aaatgatgtt acgccagcgg attaacgaag gcgcggaagc
    26281 ctgcctgctc agtcatgccg tgtcgtccga tttggataat ctgtcggcca acctgaacac
    26341 cgcccggctg accatcaccg aagcaaccga caccgccgac gcggtgatgg aaagcgacag
    26401 cgcgctacgg ttgcgaacgc aggcggcctt tgaagggttg agcgtggccg ggccgaccgg
    26461 cgcgtatgag tatttcgcca aaagtgccag cggcaaggta gcggatgcca aagcgatcag
    26521 cccgtcgccg gcggcggtgg tggtgtcggt gttatccgcc gagggtgacg gcagcgcctc
    26581 ggctgacctg ctggcggcgg ttgatgctgc cctgtctgct gacgataaac gcccggtcgg
    26641 tgaccgcctg acggtgcaaa gtgccgaaat tgtgcgctat gccattacag cggtgttgta
    26701 ccgctatccg gggccggaat cggaaccgat ccaacaggcc gcgcagcagg cattaacgtc
    26761 atggcttggc gcacaggggc gcatcgggcg tgatgtggct cgctcggccg tcatggcggc
    26821 gttgcatgtt caaggggtgc aacgtgtcga gctgctggaa ccggcgcaag acatcgtgat
    26881 cagcgacacg caagcggcgt actgtaccgg gttcacgatc accgagggcg gtagcgatga
    26941 gtaacagcct gctgcccccg tcagccagcg actttatgcg ccacgtcgcc agctcaaccc
    27001 aacacctgag tgagatagcg gtcgatctgg atacgttatg ggacgccgag cgctgcccga
    27061 cacaattact gccgtacctc gcctgggcgc tgtcggttga ccgctgggat aagcgctggt
    27121 cagaacagac caaacgtcag gtgatcaagg cggcatggct ggtacaccgc cagaagggca
    27181 ccctcgcggc attgcgccgg gtggtggagc cgttcggcta tctgattcgg gtcacagaat
    27241 ggtggcagac cggcggccag cccggcacct tccggctgga tatcggcgtg caggatgctg
    27301 gcatcaccga agaaacctat cttgagctgg agcggctgat cgccgatgca aagccggtga
    27361 gccgtcacct gctggggcta aatatcgtca tggacagcgc gggtgaaatc ccgattgccg
    27421 cagggcagta cagcggcgat gcattgactg tctatcccta ctttcctgaa accattacta
    27481 caaccggcgc tgacaggtgc ggcggtgcga tacatctttc tgataacgtg agtgtgaatg
    27541 catgacgaca aaatattttg ccttgctgac aaacactggc gcggcgctgc tggcgaacgc
    27601 taccgcgctg ggacggcaac tgtcgattac acaaatggcg ctgggcgatg gcggcggcac
    27661 cctgccaact cccgacccgg cacaaaccaa actggtgaac gaacggcgcc gggcgccgct
    27721 caattctctg agcgttgatc cggcgaaccc cagccagatt attgccgagc aggtgatccc
    27781 cgaagatgaa ggcggctggt ggatacgtga aatcggcctg tatgacgcca acggcaatct
    27841 gattgccgtc gccaactgcc cggaaaccta caagccgcag ttacaggaag gctccggccg
    27901 ggtgcagacg gtgcgcatga ttttgattgt cagcagtacc gacgcggtaa cgctgaaaat
    27961 tgacccgtcg gtggtgctgg cgacgcgggc gtacaccgac ggcaagatca ccgaggtgaa
    28021 atcctatgcg gatacgcagg cgagcggagc caaaagcgaa gcgaaaacct atgccgatgc
    28081 acaggtgaac ggtgccaaaa gtgaggtgaa ggattatgcg gatgcgcggg caagtggtgc
    28141 caaaagcgag gcaggggcct acacagacag cctgatgacg gcgcacctgt ccgccgctaa
    28201 tcctcaccca cagtacgcgc cgatagccaa cccggcgctg actggcacgc cgactgcgcc
    28261 gacggcgagt ttcggcgtaa gcacaacgca gatcgcaacg atggccgcta tccaagcagc
    28321 gaaaggggcc attgccagcg tccagtcggt ttccagcacg aacgcgctca cggcctcagc
    28381 agccggcgcg cttgtctaca tgaccggcgg cacgacgttt accactacgc tgccgggcgg
    28441 ttcaaccgtt gccctcggcc agaccattcg gctcattaat tactcgacag tagcccaaac
    28501 gctagtcagt gctggagtgg acattattta tggcggcgcc gtcgccgggt ccgtatccgg
    28561 catttcgctg ccgccgggcg cgggcattga gttgatatcg cgcggaaatg gcgaatggga
    28621 tgtcattggg ggatcgctct cgattcagta cgcctctggg ttgacgctgg tttcgccagc
    28681 gctgtcaggg gcgccgacgg ctcccactgc cgcctctggg acaaacacaa ctcaaattgc
    28741 gactaccgcg tttgtgcggt ctgaaatcaa tagtgtggtg acaggcatac cgctaccctg
    28801 gccgcaggct acggcgccgg cgggctggct taaatgcaac ggtcagtcgt ttgacaaagc
    28861 gctctatccg aaactggcgg cggcgtatcc atcgggcgcg ctgccggatt tgcgcggcga
    28921 gtttcttcgt ggctgggatg acgatcgcgg tgtagatggt ggtcgaggta ttgccagtaa
    28981 gcaggcggcg accggattac gaacgggggc aatggactac aacggcagcg atgcagacag
    29041 cgctggggta tacgtgggca tcggctatgc cgatgctgac agttcagtaa acaccgtaaa
    29101 ttttactaac cagggttacc ccaatggcac gctaatggct ggtggcgctg gcagagacaa
    29161 cggggtttca ggtacggcga gcaataccgt attttcgggc ggcgtgaact ggataacggt
    29221 acgcccccgc aacgtcgcat ttaactacat cgtgagagct gcataatgaa tgagaaatat
    29281 tctgttgctg taaaaggcgc cgcgctgggt cagaacggac tggctgagcg tgcgggttgg
    29341 ctgactgttt accatgttga tccgctgacg cgcgagtata cgggcgcgag ctatgaatac
    29401 ctgatggtcg gcacagggtt acccgctgat agttacgccg acgcgcccga cctgccgccg
    29461 gcgggtcagg cattgcggcg ccgcgttgac ggcgaggaat gggagcatgt gccggattat
    29521 cgcgggcaga cggtgtatcg cacggcggac gggcagcaac aaacagtgac aacgctcggt
    29581 gagttgccgg atgagctgac gctgttggcg ccgacaacag cgtacgatac gtgggacggc
    29641 gccgcatggg taacagacac cgccgcgaaa caggcagcgg caacagcagc ggcgcagcgg
    29701 gaactgtcag cacgtaaagc gacggcgacg gcgcgaattg ctgaattgag ttacgcggtt
    29761 gatctggcta tggcgaccga ggcggagcgg gcagtgctga ctgaatggaa aacctatctg
    29821 gtgcagttgt cacgcatcga caccggcgcc gcgccggata tcgactggcc ggaaattccc
    29881 tcatcctgac ttattcggcc ctgtttagac agggccgtta aaccagccct ttcaacgtgt
    29941 tgacagtgtc cgtcatggcc gtgctgacgg tattcatcgc tttggttgca ctgctgcgcg
    30001 cattgtccat catgtcgcta aaggatgaag attgcagctt ttcccgcagg tcttcatcac
    30061 agcgctggaa gctcagcgaa aactcaatct tctttgcctt tccgtagcga ttcaactctg
    30121 tgcgcgtggt atgcataccg gttagcacgt acatgccgta aatctgcccg gtgccatcaa
    30181 tcaacggcca ggggcggccg ctgtaggctt gcgtggtcag cgcggttaac gacacctcgc
    30241 caccggtaat ttccgggtac agcacaccgc tcagcgtgat ctgatcttcc cccgcgccaa
    30301 tgtattgcca tttcgcggaa cggttgatcc gctcattctt cacatgacgc caggcgcgcg
    30361 actgctgaag ctgctggtaa ggcagcgttt gcagctcaaa cacaaacaac ccgtatacca
    30421 tcatcatcgg tttttctcct tactctctgt ctctgaagct gccgcgctga agtctgtcgc
    30481 ggcgggccag ttcggcactg actgcatcgg ccacaatacg gcccagctcg cgggcgtcct
    30541 gccgttcaac gccgtgcagg tgtatatgaa tttccccatt gaaaccaccc gccgccggtg
    30601 ttctggccgc cggacgactg accggggacg cgtcggcctg tttgacgggc tgtgttgccg
    30661 cgaccacggc ggggcggtcg ctgagcgtct gcatggtctg ggctggttgt gaaggggcag
    30721 aaggtgtgcc gccagtaagc cgggcttcct gccattcgcc acgcacggcc agcgctttcg
    30781 gcaggttttt gaaaacgata tcgccggggc cgatgcgctt tttggtttct tccagcacgc
    30841 cgccggtgtt gtcggcaatc ttctgcaaac ggcgctgggt gccgctgtcc ccggtcaggg
    30901 gcggcttggg cgcaggcggt ggtgcagtgg tggccccttt taaatcgccg gtcaggttgg
    30961 tgaccagacc ctgtagccgg tttttccctt ccggcgtcag ttcgcctttc aactgatcgg
    31021 cttttttctg tgccgcatcc agcccggatg ggattaaacc gagcttttca agaacccagc
    31081 cgatcccctc catcagtttt tgcagcggca ataacagcat gtccagcgcc gaacccagca
    31141 cctttccgaa tccatagcct gcgatcgcgc agtcatccag cgtcttcttt gtggtctgga
    31201 tagggtcaaa gagctgctta aatcgatccc acaggcgaga cacggccgac acaatcacat
    31261 caaagacggg agcaaggccc gtaaacgcct gccgaatggg gccaaggctg ataacaatgc
    31321 cggtaaacat cccgctgaaa aacgctttga taggctccca gaatcgccag ataagcagtc
    31381 cggcggccac aaacgccgta ccaatcaacc cgatcgggct taacagcagc gacagcacgc
    31441 cgcctaacac cgagacagcg ccggtgatca ggctccatag cgcaggcagg ccgctcagcc
    31501 gcaacaacag cccgcctacg cccctgacca gtgaacctaa cgccgccgcc ggagaggtaa
    31561 acacggccag cagcatgccg cgcagcgggg tcagtgtcgt ggttaggtgg cctgcgctgc
    31621 cggaaaaaag ctgtagccag ccgcccatgc gtgccatcgg cccgccgagc aggctactta
    31681 acccggaaaa catcgacacc gcgccaccga cgccccgtgc gcccagcagc agtgaaaagc
    31741 cgagctggag cttagccagc ggccccatca gcagaccgat tgccagtgag gtaccaccga
    31801 tcgccaccgc gaatgctgta gcaccgccga cagccagtaa cagcgtctgt gtcagcctgg
    31861 ggttttcttt cacccagccg ctcacgttgg tgatcacgtc acttaacccc tgcgtcaggc
    31921 tgcgcagcgg cctgtctgcc gtctcctcaa cctgaattcg aaaaccttcc caggcactgt
    31981 cgaggttttt caaatcgccg cccaggttat ccgccatctt tttggcgacg gcatccgctt
    32041 cacccttggc ttttttcagc tcgccggaca gtttacccag cgagccgcta ccggccgcct
    32101 gtaccagtgt ttgcaggccg acaaaggcct cttccccggc gatatccttg aagaaagaca
    32161 cctgatcgac ctggccgtat ttttgggtcg ctttgtacag atcgcgtaac acatcctgca
    32221 ttggccgcat cttgcctttt gcatcggcca ccgacacgcc cagttctttt aatgccgctg
    32281 cggcggcttt cggcggcgaa gccagccggg aaaggctggc acgcatggca gtaccggcat
    32341 cactgccgcg aataccgtta ttcgccagca tgccggccat tgcggccgca tcttccagac
    32401 tgatccccag cttggccgct accggcccgg cgtatttcat ggtttcgccg aggctgaaca
    32461 ggtcggtgtt ggtgcgagta aacgcaccgg tcagcacgtc actgacgcga tccatctggc
    32521 tggcatccag attgaactgt gaaagaatgt ttgacccgat atcggcggtt tcgcccagtt
    32581 ccatgccacc ggccagcgcc atattcagca cgcccggcaa tgccgcctga atggcctgcg
    32641 gagtaaaccc ggccatcgcc agaaacgcct gcccgctggc cgcatcgcgg gtggtgaacg
    32701 ccgtttccgc accgagtttt ttggcctgcg cccgcagggc cgccagttgc tgatcgcctt
    32761 tatccaggcg ggtcagcgcc tgaacgcgcg acatctcttc atcaaacccg accgccgggg
    32821 ccagaaactg cccgcccgcg tatccggctg ccgcaccgcc tgccactgcc atcgtgccgc
    32881 tgccgcgcag tttgcctgcc gtctgctgca tccgttcata acgggcgtgg gcctgcgtaa
    32941 cggcggccag ttgccgccgc tctcgcccca gtgtctggtt atattgctcg gtgcgccgga
    33001 tggcactctg gatagtggca ttgctgccga ccagcgacac gccgtgaccg cgcagcgcct
    33061 gcgagacggc gcgcagttta accatttcct gatcgcgggt gacgttcagc cgctccagtt
    33121 tggcggccag tgccgctata tgttcccgtt gcttatcggt cagcacggtg ccgctttgct
    33181 gggccttttt cagcccgtcc aggctacggc tggcttcatc aatcttgcgt gaggtctttt
    33241 gtacgctgtc gcgcaggcgg ttgaaggtcc tggactgatt gtccagatcc ttaatagcgg
    33301 cctgggtgcg tttgagggat tcagacaaac cgcccgcact ctggcgggcg gcgttgaccg
    33361 ggcgggtcag ccggtcgata gcgctgaagg ctacgcggat atcaaggctt ttcatcggct
    33421 tcactggctc cacttcggat agccgcccgc gcgcgccagg ctatcacgtc gcccagatcc
    33481 atgctgaaca gttcagaggg cggccagtta aaaacaacgg cgatatcagc gaccagatcg
    33541 tctatctggt cgaactgcaa tacggttacg cttcctccgt cgcctccgcg ttcggctcgc
    33601 caggctccgc atgcactaaa aaaggcgtga tggcctccgc cagtcgcatg aaatcgcggg
    33661 tatccatcgc gttaatctcg gccagcttca gctttggcga ggtaacgcgc gttaacaggg
    33721 tggtgatgga atccacatcc atattcagga cgttgaccag ccgcaggccg cgcagtgagc
    33781 cagcctgttt gatatcgtcg gtaatgctca cctggctgat agtgctatcg ccccgcacga
    33841 taggcgtcgc cagggttacg gtgtgttcat tcggtgtgtt catggtgaca ggctccgggc
    33901 ggcttgtggc cgccatgatt caggttgttc agttacccag ccccagcgca gacgtgatgc
    33961 gatccgggta gatgtttttg ccgtttttct tgtagatgaa attcagcagg tcaatttcca
    34021 gcaccgattg atcgtcaatc gacagcttgt aataggtgtt ttttagcgca taggtaacgg
    34081 acgtgtcttc gccctgcttg gactcgccgc cgtcaatctc ggtaatacgc ccgcgcattt
    34141 ccacctcgac aagctggcta tcgccgtcgg tgtagtattc ccccgcgaag cgcaggcgaa
    34201 cgtcatcgat atcgccgccg tattccagca atagcttttt ctccatgccg ccgacaacca
    34261 tctgcgcttc cagtgcgccg gaatccatac cgagatcgac cgctaccgag ccaatcatgc
    34321 ccgcgccctg aaagtcttca gtcttgcggg tcagctttgg cagcgtgacc gatgtgacct
    34381 tgccgatctg gttgttgccg ttcacaaaac aggtgaacag gcgcaattta tgcggtacgg
    34441 ccatttacac acctcccagt gacgagaatg cagattcaaa atagtcatcg gtgaaggtct
    34501 ggtataacgt caggtcttcc agcggcggca ccggcgtgta cttgtaacgc acgcgcacct
    34561 gtccctgtcg caggccggtt gtggggttat cctgaatatc gaaccagcat tccccgccga
    34621 tcagcctgcc cgccgtgacc agcgcgctca gcttgccgtt gatgccgttc accacgtctt
    34681 tcacgttagc cggggtcagt ggctcgtcaa cggcttcaaa ctgcgcttcc gcgatactgt
    34741 cagcgaggat ttgcgcggta cgggtgtaca cctcaaacag gtaatcatgg gtgtcggtgg
    34801 tgcggttgcc ccagaagcgg aacccgttac gcttaatcag cgtggtgatc tcctggttgt
    34861 tgagttcatt ggcgtcgctg tcttcggcct gaagtgacca gaacacgtcc cgcgagatgc
    34921 ccaacacgtt attcactgcc acgttcgaca gcgacttatg ccagccctga tcgttatcaa
    34981 tcgccgcgcg caggccgcag gcatacgccg gcgccgggaa cgtttcattg ctgccggcct
    35041 gcgggttgta ggcgatgaaa tccggccaga tcagcatcag ctcacggtag gcaaactgcg
    35101 cgcggtaggt gatggcctcc gccatcgtga tgcagccgtg acaaccggcg tagacaaacg
    35161 cccgcaggtt ctgcgcaatc acacacagcg ctgacgtcac ttcggcggtg tcatagtctg
    35221 gtaccgccag aatgcgcggc cggtaattga ccttcgcttc cgccgtcagc aaggcataca
    35281 tgccggtata actgccgtct gccgccgtcc cgccaataat cagttgggac tgggttttgt
    35341 cgccgccttc ggttgctgct gccacccgta ccacgatcac tttcgggctg gtctggtcag
    35401 aaattgcttt cagcgtcttg tagagcgagc cggttttacc cgctttgccc agcacgctat
    35461 tcacccgtgt gatcaacacc ggcgtattca ggggaaaggt gtctgcgtcc gcatcatccg
    35521 ccaccgccac cacgccaatc acatttgaat caatgtcatt gattgcggtt accaggtcgg
    35581 tattttcacg aacgcgcaca ccgtggaaac gtgtctcgga catgttcgcc accattacgt
    35641 tattgagttc atggcgataa tccctgatat ccgtcgcgca ctcacgcgct gacgggtctg
    35701 gccgcccggc gacaacaaaa agccattttt ccccacgcgt gcgcgtgaaa tcatgcggca
    35761 aaaacagggg gaaacgatgg ctatcaccga actggctgac tcacttatcg gcgcagcgaa
    35821 gcgctacgat gacgcactga ccgaggcggt aaaaagcccg gccttcagca ttacgttggg
    35881 cggtaaatca ctgaaggaac tgagcgaccg actgatctcg ctgtcgctga ccgacaaccg
    35941 gggctttgag gccgaccagc tcacgctgtc gatagacgac agtgacgggc gtgtagagct
    36001 gccgccgcga ggcgcccaga ttgcgctgtc catcggctgg cagggtgagg cgctgaccta
    36061 caaagggttg tacaccgtgg acgagatttc ccacgaaggc ccgcccgatg tgctgggtgt
    36121 gacggccaga agcgcggatt ttcgggaaga gttcaacgtg aaacgggagg tctcctggca
    36181 tgacgtgacg gtagagcgtg tcgtgtcggc gattgcgcac cgctacggta tgaaggcgca
    36241 aatcagcgac atgctgatga atatcgaaat cgaccacgcc gaccagaccg aagaaagcga
    36301 tatgtcattc ctgacccgga tggccgagca actgggggca attgccacca tcaaaaatgg
    36361 tacgttgttg tttatcctgc ccggcggcgg tgtgacggcg tccggcaagg cgctgccgtc
    36421 ggccagcctt acccgcagca gcggcgacgg ccaccgcttc cgcattgcgg atcgggatgc
    36481 ctataccggc gtgcgcgcct actggctgga cttgaaattc ggtaaaaaga aaaaggtcag
    36541 cgtgaagcgc cgccggataa agcccaaacc caaaaaagag aagagcagca gccgcgaagg
    36601 tgattacatc acaggcgcag aaggtaacgt gttcgtgctg cgcaaaacct atcagaatga
    36661 agaagcagcc aagcgggccg ccgcggctaa atggcgccag ttgcaacgcg gcgccgccga
    36721 gttctcgatc accctggcgc gtggacgtgc tgagctttat cccgaaatgc acctgacggt
    36781 aagcggcttt aaaccggata tcgacaatca ggactggatc atcgcccgcg cggaacacgt
    36841 tattgatggt aacggcttta ccacccgtct ggagctggaa gcaaaaatcc ctgactggat
    36901 agcggaaagt gaataaaatg gcggcgagtt caactcccac aggggagcca ttatgttcag
    36961 atgtcctttt tgcggggcaa tggcccgcac ccgtaccagt cgccgcctga gcgatatcac
    37021 catccggcag tatcaccagt gtcaaaatct ggaatgcagc gagacgttta ccaccctcaa
    37081 cacggtagaa cggcgcgtat caaagcgcac acgggaagac ccgctaccgc ctgactttat
    37141 cccgcaagac gcctttccgg cttcgcatta cggacgggat cagctgaatc tggcgttgta
    37201 aaacaaaagc cccgcaggat gattgcgggg cttttgtttg ggtaccgatt atttaacaac
    37261 agttaacaat ggcggctgat tgaagaccgc cttttttgta cctgaaaaac gggcgctgcc
    37321 actctgctgc cattttgctg ccacttgcca aattacaggc acaaaaaaac cgcctcgtgg
    37381 cggtcatgtt cttttaatta ttttcttata ttacaaggcg ttagcacatg gtgcccagag
    37441 cgggacttga acccgcacag cgcgaacgcc gagggatttt aaatcccttg tgtctaccga
    37501 ttccaccatc tgggctcaga tttggaggcg cgtcccggag tcgaaccgag gtggacggat
    37561 ttgcaatccg ctgcatggcc actctgccaa cgcgccttac cttgatgcta ctgctaaatc
    37621 gatttggagc gggaaacgag actcgaactc gcgaccccga ccttggcaag gtcgtgctct
    37681 accaactgag ctattcccgc attctacaga acatcttgtt tatcaagcgt tttcaataaa
    37741 ctgtgtcgct gtcgatgcgg tgcattctac ttacctgacg cagtgagtca ataaaattat
    37801 catcccacct gaatcgtttg ctgtttttta aggcgaggcg atcaatgttc aagcaaatcg
    37861 cgccaggcgg cgctcagata ctgaaacatc gaccaaaacg ttagcactgc ggccacatac
    37921 aacgccgcca cgccagcggc ctccaccatg cgctccggtc gccacaacaa accgaccagc
    37981 gcgaccatct gtgccgtggt tttgatttta ccaatccagg acaccgccac gctgctgcgc
    38041 ttacccagct ccgccatcca ttcgcgcaat gcggaaatga tgatctcacg ggcaatcatt
    38101 gtggcggcgg gcagcgtaat ccaccaggaa tgataatgct cagccaccag taccagcgca
    38161 acagccacca tgaccttgtc ggccacaggg tccagaaatg cgccgaaacg cgtggtttgt
    38221 ttccaccggc gggcaagaaa accgtcaaac cagtctgtca ccgcagcaaa gacaaaaatg
    38281 cccgcacata ccattggtgc ccagctgaat ggcaggtaaa acgccagcac aaagaatggg
    38341 attagcacaa cacgaaacag ggtaagccac gttggtatat taaatcgcat agcgtctggg
    38401 taactgtctg gcccgaaaga taatagggtt atgttgctac attgcctcta gtgtttcaat
    38461 gcatgaaaga ttttttctgc caacgcatgc gaaattcccg gtacgttggc gatgtcttcc
    38521 acgctggcgt tcatcagcgg ctgtaatccg cccatgtatt tcaataacat ctgccgccgc
    38581 ttcggtccca ccccttcgat agtctccagc gaactggtgc tttttacttt agcacgctgt
    38641 ttacggtgac cactaatggc atggttatgc gaatcgtcac gaatatgttg aattacatgt
    38701 aacgccggcg aatcggcagg cagcgccacc ccctcgcctg tcgcttcgaa gaacagcgtc
    38761 tccagcccag ccttgcgatc gctgcctttc gcgaccccca gcagtaaagg gcgtgatttg
    38821 tcccagggca cctgtaatga tgcaaagaca tctttggcct gcgccaattg ccctttgccg
    38881 ccgtcaatca cgatgacatc aggaatctta ccttcgtcaa tcgacttgcc ataccggcgc
    38941 cggagcacct gattcatggc ggcatagtca tcccccggcg tgataccgga gatattgtag
    39001 cggcgatact ccgcgcgcag cggcccgtcc gcattgaaca cgacgcagga cgccacggtc
    39061 tgttccccca tggtatggct gatatcgaaa cactccatgc ggttgatttt ttcgatccca
    39121 agaacagacg ccaacgcagc cagacgctgt tggaccgtcg attgctgcga caacttcgtc
    39181 gtcaatgctg tatgggcgtt ggtgcgcgcc agtttaagat agcgtgcgcg gtcgccacgc
    39241 ggccgggttt gaatctgaat tttacggccg gcctgttcgg tcagcgattc agccagcaac
    39301 tgatgttccg gcaacgagaa gtccagcaag atgtcagacg gcaaggtacg ggaaacactg
    39361 ccttgcaaat agaactggcc gacaaacgtc tgcaccactt ccgccagctc tgtccctccc
    39421 gggactttgg ggaaatagct gcgactaccc aacactttcc cctgacgaat aaagagcacg
    39481 tgcacacacg ccataccggc ttcaaatgcc acaccgatca cgtcaagatc atcgccgtcg
    39541 ccggagacaa actgcttttc tgtcacccgc cgcaccgcct ggatctgatc gcgaatacgt
    39601 gcggcttcct caaacctcaa ttccctgctt gccgtttcca tacgatcgat cagacgagtc
    39661 agcacctgtt gatctttgcc cgacagaaag agacgcacat actcgacctg gcgctgatac
    39721 tcttcctcgc tgaccagacc gcttacgcac ggccccagac aacggccgat ctgatactgc
    39781 aggcaaggac gcgagcggtt gcggtagacg ctgttttcac actgacgaat ggggaacagc
    39841 ttttgcagca gcatcagggt ttcgcgcacg gcattgccat tgggaaacgg gccgaagtat
    39901 tcgcccttgg cgtgtttggc gccgcggtga acggacaggc ggggatgcgt atccccgctg
    39961 aggaaaatca ttgggtagga cttatcgtca cgcaacagca cattgtaacg cggctgataa
    40021 cgtttgatat agttgtgctc aagcaacagg gcttcggttt cagtatgcgt gatcgtcaca
    40081 tcgatctgcc ggatactttt caccaaagcc tctgttttac ggctggcgac atgagcacga
    40141 aaataactgg aaaggcgttt cttcagatct ttggctttac cgacgtagat aaccgtgtcg
    40201 ctggcatcgt acatacgata aaccccaggc tgactggtta cggtcttcag aaaagcctgg
    40261 gcgtcaaaac gttcagtcac
//
