# Supplementary material for: May the Phage be With You? Prophage-Like Elements in the Genomes of Soft Rot Pectobacteriaceae: Pectobacterium spp. and Dickeya spp
Source: Front Microbiol. 2019 Feb 14;10:138. doi: 10.3389/fmicb.2019.00138 (PMC6385640; doi:10.3389/fmicb.2019.00138)
Supplement: Supplementary file 2 [file Data_Sheet_2.ZIP › Supplementary_prophagesGENBANK_files/Genbank FILES _SRP_prophages/phiD5.gb]

LOCUS       Exported               38397 bp ds-DNA     linear   UNK 08-AUG-2018
DEFINITION  phiD5.
ACCESSION   .
VERSION     .
KEYWORDS    .
SOURCE      phiD5
  ORGANISM  phiD5
REFERENCE   1  (bases 1 to 38397)
  AUTHORS   .
  TITLE     Direct Submission
  JOURNAL   Exported Aug 8, 2018 from SnapGene Viewer 4.2.3
            http://www.snapgene.com
FEATURES             Location/Qualifiers
     source          1..38397
                     /organism="prophage phiD5"
                     /mol_type="genomic DNA"
                     /label=/genome_id=6666666.356830
                     /note="/genome_id=6666666.356830"
                     /note="/genome_md5="
                     /note="/project=robertczajkowski_6666666"
                     /db_xref="taxon:6666666"
     CDS             1..312
                     /codon_start=1
                     /product="Phage holin # possibly family II"
                     /label=Phage holin # possibly family II
                     /db_xref="SEED:fig|6666666.356830.peg.1"
                     /translation="MNETDKSIVSLFIIGTLIAVGKVLSGSEPITLRLFIGRVMLGGFV
                     SMMAGIALVQFPDLSPVAINGIGAALGIAGYQAIELLIQRRIRQLGEQAAPERKDNAQ"
     CDS             302..793
                     /codon_start=1
                     /product="Phage lysin, 1,4-beta-N-acetylmuramidase (EC 
                     3.2.1.17) or lysozyme #Protein S in phage lambda"
                     /EC_number="3.2.1.17"
                     /label=Phage lysin, 1,4-beta-N-acetylmuramidase
                     /db_xref="SEED:fig|6666666.356830.peg.2"
                     /translation="MLSNSPNLTAFLDMLAFSEGTATHLLTRNRGYDVIVTGIDGKPEI
                     FTDYQDHPFANGRPGKVFNKQGQRSTAAGRYQQLYLYWPTYKAQLKLPDFGPNSQDTLA
                     IQLIREQRALDDIIQGRIAHAITQCNNIWASLPGAGYGQHEHDIEHLLTVYQQAGGEVA
                     "
     CDS             790..1230
                     /codon_start=1
                     /product="putative regulatory protein"
                     /label=putative regulatory protein
                     /db_xref="SEED:fig|6666666.356830.peg.3"
                     /translation="MKSSMIIAVIMMLLSAGVGVQSWRLHTTLQLTEQQAQTLSLQQTE
                     LDEKSGQLKTLSEQAERNNIEQARLRNMAADTQAALSERQKVIMRLQHENEELNRWAST
                     TLPADIIRLRQRPALTSGRAYREWLSQTDSVQISSSQPTNQR"
     CDS             1244..1417
                     /codon_start=1
                     /product="hypothetical protein"
                     /label=hypothetical protein
                     /db_xref="SEED:fig|6666666.356830.peg.4"
                     /translation="MDETEAALATCADQVDTIIACQTKNITTVAGIQATSPALPTEKRS
                     IPGESRWTDIPE"
     CDS             complement(1999..3006)
                     /codon_start=1
                     /product="Phage integrase"
                     /label=Phage integrase
                     /db_xref="SEED:fig|6666666.356830.peg.5"
                     /translation="MAVSKLPSGKWLCQCFPYGRDGQRVRKQFTTRGEALAYERRLMAD
                     KKGISTETNSTTLQDLIQRWYDMHGQTLESGEDRYAKLMAICVRLGNPFAVDVDKNMFA
                     VYRERRLKGEWNPKGKTAIKEATVNREYSYLRAVFSELKRMGEWEKENPLDGIRQFKEG
                     DQELAFLYPDEIKRLLAACDESENKDLGIIVRLCLATGARWGEAQTLKQSQILPGRITF
                     VKTKGKKNRTIPISERMHALLPKRRGQLFKPAYEAFKHALKKAHIELPEGQLTHVLRHS
                     FASHFMMRGGNILVLQQILGHSSITMTMRYAHFAPDHLDAAVTLNPFDSLTTDE"
     CDS             complement(3013..3897)
                     /codon_start=1
                     /product="hypothetical protein"
                     /label=hypothetical protein
                     /db_xref="SEED:fig|6666666.356830.peg.6"
                     /translation="MADEKLDFFNYKRNKDKLIINLINIIEGINCDGHIDEKEVLFLDT
                     WIKDADLISKNYCVRMISNRLSDILSDGVIEPYELNYLKADLIKVQKELSDLPELDLYS
                     DEADKHLLEGLCKGMMANHELNDSEIRYLNWWLSSNASLKVNYPGKELYALVNRILADG
                     IITSEERDELKKALIAFTGSDVDSGVVDGLATRLPVDDIESLVLSNATVCLTGEFLYGK
                     RSVCKKLIEDAGGKVIDNITAKLDFLIIGTLSCKHWRYQAHGRKIEKAIDYRDNRGIPL
                     KIISEEQWQSFTG"
     CDS             complement(3996..5174)
                     /codon_start=1
                     /product="hypothetical protein"
                     /label=hypothetical protein
                     /db_xref="SEED:fig|6666666.356830.peg.7"
                     /translation="MTFEEWISKNEKEIFFTYINANNEVSNNYVSDAVYKDNYLQGYCI
                     NKKGFRTFKLERVLDVYSSNEEMISAASPLTIADLKIEDRREKNTPRGLEICFTGFSKE
                     IKDDLESLAEKKGLSVRKGITAKLYFLCCGPNAGWKKIKQANEKNCFILSKDQFLLFID
                     TGEIPIESTEAYESDEKDIHEKIENLHNEVTSTFRTIREPRRSTALIARFVDGYASGWR
                     FAIRESHRDALDIKLTKFVFNKHQYEDWTQGSSFSFGRGDVFYSDKLGYSEWSEFLKIP
                     DAVVLQVKYECFSGYDPVATIDGFFSGDFIPYHQLTPKKLTNLPIMIESQSYDPGKITL
                     DIFKPSIDRSKIDLFDTIKITQDELISLLQSGYYWKKDEGKKPVRVNLFGGN"
     CDS             complement(5254..5865)
                     /codon_start=1
                     /product="hypothetical protein"
                     /label=hypothetical protein
                     /db_xref="SEED:fig|6666666.356830.peg.8"
                     /translation="MSVESHGNENRVAGRDFYESSITVDKINIAIPAANEEKRPLVPAQ
                     RKQLNQLVKEIADGGYEEGFSVWQRVHAEIGVKSIEDMTVNQYQTAVSYLQALRDRYRE
                     KDASNALVHLLLKNTQQVEQRQQLIHYCHIHFGTGRLTELTRSQLQQALSWLDDRQCSA
                     VPGQTTPNTRQSWQDVLKAEPLIFSAVFTAGIIMGAIFFR"
     CDS             complement(5881..6297)
                     /codon_start=1
                     /product="Transcriptional regulator"
                     /label=Transcriptional regulator
                     /db_xref="SEED:fig|6666666.356830.peg.9"
                     /translation="MSTSKEEFLFLIGERLREERETIGKSQSAIAEELGTTTRTWGKYE
                     RGETAPDGVTLALLSARYGMDVSYILTGKRTPDLGDISNDELELIKIYRVAPLAVKAAA
                     LAALTAGSSASAGSINITGSGQRVAGRDYHENKK"
     CDS             6427..6552
                     /codon_start=1
                     /product="hypothetical protein"
                     /label=hypothetical protein
                     /db_xref="SEED:fig|6666666.356830.peg.10"
                     /translation="MRLSEDERARLAALAEKESRSLSSMARLVFLRGLESFNAEG"
     CDS             6558..6770
                     /codon_start=1
                     /product="hypothetical protein"
                     /label=hypothetical protein
                     /db_xref="SEED:fig|6666666.356830.peg.11"
                     /translation="MSKGLTININVPTPYVSLRKYSELTGIPFETCRGMVKSGKIIIRP
                     KEKANEKVEVNLVAMLRDAIASSEI"
     CDS             7286..7552
                     /codon_start=1
                     /product="Phage protein"
                     /label=Phage protein
                     /db_xref="SEED:fig|6666666.356830.peg.12"
                     /translation="MLRGKHFKTNSEKEMCRFIDDMRDKIDDDYHKNMRVLSAIFELAD
                     IDKERHHLKFNELTTDEKERLIKAMNKLRAVVSLFPKNLILPL"
     CDS             7617..7847
                     /codon_start=1
                     /product="hypothetical protein"
                     /label=hypothetical protein
                     /db_xref="SEED:fig|6666666.356830.peg.13"
                     /translation="MKNAEVTHITVAADGALAELLKKARLEERKDQHLSFSVRLAALAI
                     HAQQKSLSAAEVVELMRQESERFEHSVQGLS"
     CDS             7856..8071
                     /codon_start=1
                     /product="Phage protein"
                     /label=Phage protein
                     /db_xref="SEED:fig|6666666.356830.peg.14"
                     /translation="MDMAQEREAFIRETQIQQARQQSGCAVSAFICESCDAPIPEARRV
                     AVPGVRLCVYCQGDAELKNKHYRGAL"
     CDS             8068..9024
                     /codon_start=1
                     /product="Methyl-directed repair DNA adenine methylase (EC 
                     2.1.1.72)"
                     /EC_number="2.1.1.72"
                     /label=Methyl-directed repair DNA adenine methylase
                     /db_xref="SEED:fig|6666666.356830.peg.15"
                     /db_xref="GO:0009007"
                     /translation="MSIIATPLKWVGSKARVMDILREHLPAGDRLVEPFAGSCSVMMNT
                     DYPEYLIADINPDLINLYQVIKEDLKEFIDTAEGLFRTANTAESYYRFRQVFNRSKENR
                     TTSAALFLYLNRHGYRGVCRYNRAGGFNVPYGHYASPYFPLAEIHAFAEKARRAKFICA
                     AFGETLQLIRPGDVVYCDPPYIPQTPTASFTSYHTDGFTHNDQYDLCSELSRLSERGIP
                     VIASNSDTHHAHSLYHRFDICRFTAPRSVGVAAGESKQAGEIIAKRLPIPAARSLSKVC
                     DGCGYEGGGHCPDCGPVMGDATYQEMVASGALDAEPF"
     CDS             9163..11571
                     /codon_start=1
                     /product="Phage replication protein # Replication gene A 
                     protein"
                     /label=Phage replication protein # Replication gene A
                     /db_xref="SEED:fig|6666666.356830.peg.16"
                     /translation="MVKRALAAPGDDLNLNQAVAQLEHWEPNGTQLHIRRGLAEIVRRD
                     HQEAVSGWMKTPEGVEARLHEQPFFIRDVYRQKIEWLRANREPRHISAFFMGTVKKALL
                     RLDAVRAQQGVRDGFASELAAYWGPRWVHLAEFTRHEVINAAHTLATAIAEMFETECGH
                     TSPEDMTDNKIQWLYRHLGYELLALRVTPPCWGLVIGDEQARHRIYSAILRITSPEWWG
                     RKLWRLRCEWRENQFRAIGVIHKKRMPYVSLDALNQWQEQRRKNRAFFQTHELVDEDGN
                     ITSLENMVYGSISNPAIRRHELMTRMAGVEMVAIARGDEGVFLTITCPSRYHANIQNGH
                     QNPKWDHASPRQGQRYLCRTWARAMSALNRRGLRPYGFRVAEPHHDATPHWHVLLFMPP
                     ADRKAITDILREYFITEDRAELGRNTGARFKAKKLDPRKGSATAYVAKYISKNIDGYAL
                     DGELDNETGKPLRETAKFAMAWASQHNIRQFQPFGLPPVTVWRELRRLANQLTAAQKES
                     GTFKRGAAQLVDPAMDAVLASADAGCFATYIEKQGGVLIPRERYTVRIAYEDADEQNTY
                     GETPEKIFGVFSPRLGAISRICTRLIKWKIRKKQSADDGASIGTGSGLAVTSPTGDAWS
                     SVNNSTGDEKTAIPAGIDGDDYGSCEAPDGEPGDTSAQTFADFERMTDPERRALLSRLR
                     TQPTDRRNNQHSSTTQRNTSAEKQVVGKLPDEWRASIADFARSIGWDINTGELQRLAAG
                     NAITFADHSYVASTDGCLYRTQTRKQKETEYQDKATALLQRIAVLRDVS"
     CDS             11986..12663
                     /codon_start=1
                     /product="Methyltransferase"
                     /label=Methyltransferase
                     /db_xref="SEED:fig|6666666.356830.peg.17"
                     /translation="MGYLGSKAAAGAYQKIIAAMPPHDTYIETHLGGGAVMLRKPPTLR
                     NVGIDIDEDALKNFAFTHKLANVNLVRRDAVEYLSMFDFSRAGRVLIYADPPYLPETRT
                     SRNSYRYEYTADDHRALIAKLRRVPASVMVSGYPSALYDELLYDWRAIEFQVMTRGGVR
                     TEKLWMNYPESAAYSASFAGQDYIDRQRIKRKAERWAAKYRAMPPAERLAIMAEIMKID
                     GEA"
     CDS             12766..13026
                     /codon_start=1
                     /product="hypothetical protein"
                     /label=hypothetical protein
                     /db_xref="SEED:fig|6666666.356830.peg.18"
                     /translation="MVKVIWTRKALKQRSTIDRRYQDTISEKVAELENFPAVKLDITAL
                     KGEAGKFRLRVGDYRVIFEIIKGEPVVCEVQAVKRRTSTTY"
     CDS             13097..13465
                     /codon_start=1
                     /product="putative regulator"
                     /label=putative regulator
                     /db_xref="SEED:fig|6666666.356830.peg.19"
                     /translation="MSKLQFINDVNGKPQFVVLPIGEYEKLMSDSDAGYEEIPYLADEH
                     DNETVPNDVVEIMFRDDISLLAAWRVYRGLSQYDVAERLGTTQSAVSQWEAKDSRPQKK
                     TRQKLAELYGCRPEQMIL"
     CDS             complement(13918..14970)
                     /codon_start=1
                     /product="Phage-related capsid packaging protein"
                     /label=Phage-related capsid packaging protein
                     /db_xref="SEED:fig|6666666.356830.peg.20"
                     /translation="MKRKDKTGTRRVVTASQPDMAAALKSDPGLSAFTFDGPYPVRDGH
                     DLLDNMYCADNGRYYDTPVDWYGLARAFGSASWHQSALYFKRNALTGCFIPHPLLSRQA
                     FSAFVLDWFVFGNGYLERRVNRLGGVLALRHVPAKYTRRGSDLDTYWFIRQWKDEHTFD
                     TDSVCHVINPDIHQEIYGMPEYMGALLSASLSHSADMFRKLYYDNGSHAGCIIYIGASQ
                     VDTESMDNVKKTLKEARGKGAFKNLLLHAPGGGEKGVQIIPFSQISAKDEFLNIKSVTR
                     DDILAAHRVPPQLMGAMPEGNGSFGDVEKAARVFAINELMPVMEALKHVNDWLGMEVIR
                     FNPYALLKTE"
     CDS             complement(14970..16697)
                     /codon_start=1
                     /product="Terminase, ATPase subunit"
                     /label=Terminase, ATPase subunit
                     /db_xref="SEED:fig|6666666.356830.peg.21"
                     /translation="MIQDAFVRQRAKQLYWQGYPPAEISRLMGINQNTVYAWKKRDEWD
                     ETPPIQRVTHSIDARLCQLAQKPTKTGGDLKEMDALTRQLKTLNDGQPGNAAGGKKPRQ
                     RKVKNHFSDEQISALRTNILDSLAWHQNGWYEQRHHRNRMILKSRQIGATWYFAREALL
                     RALRDDVAYPYQRHQIFLSASRRQAHQFRGFIQKVAEEVDVELKGGDKIVLSNGAELHF
                     LGTSAATAQSYTGNLYFDEFFWVSNFANLRKVAGAMATLKGLTRTYFSTPSSETHEAYP
                     FWTGARWNEKRSKAQKVAFDVSWKALNSGLLCPDKTWRQIVTLQDVIDHGWEYTDLEEI
                     RDENNPDEYNNLYGCEFVRDGESAFNLNLLFSCGADGYDEWPDWKPFASRPMADRGVWV
                     GYDANGSSGNGDSGAISVVVPPLVAGGKFRTIETQQIRGLEFEEQAKVIEALTFKYNVQ
                     HIAIDGTGIGEAVYQIVKKFFPAAVCFLMSVSSKRALVLKMLQVIRAGRWEYDRSEQAL
                     INAFNAVRRVKTPGGIMTYDTDRARGSNHGDLAWATMLAVINEPLGQEQGGGGFAMEF"
     CDS             16820..17695
                     /codon_start=1
                     /product="Phage capsid scaffolding protein # Fam Scf032"
                     /label=Phage capsid scaffolding protein # Fam Scf032
                     /db_xref="SEED:fig|6666666.356830.peg.22"
                     /translation="MMSQIPQDRTTGMSGTAKPTRKKFRVAVSGSTVDGREIGRDHLYA
                     MAESYNPQVYGARVNVEHILSPYPGSDFSAMGDVIALSAEDITDGPLKGRAALYAEIEP
                     TERMKQLTGEGKKIYSSIEIDPQFAATGKPYLRGLAMTDTPASLGTDRLKFAAQQRAQV
                     QAFNNLPGEPVMFTEAMEAELVELSEQHSDEGKQWFSRVMGIIGKGRKSDSEQFNQMRE
                     AVENVAQSHADLLDSFNTLKTQQQQDSRTIQTLTSELAALTQKLATQDNSYSQRPAASG
                     GNSGAQLADF"
     CDS             17721..18776
                     /codon_start=1
                     /product="Phage major capsid protein #Fam0066"
                     /label=Phage major capsid protein #Fam0066
                     /db_xref="SEED:fig|6666666.356830.peg.23"
                     /translation="MENTTRNLFDQYISRQAQLNGVQPNAVAMTFSVEPAIQQRMEQAA
                     QESDEFLKQINVFGVKDQEGQKILIGSKGPIASTNNSSDGTSRRNPTDNHSKEPNDYHC
                     RKVNYDSAVSYPQLDVWASQPNFQALISQANARQIGLDRIMIGFNGTTYAEKSNRSANP
                     LLQDCGVGWLQKIRNDAGHRIIKNVTLTARDEDNKIVTKGTYGNLDTAVFDAKNSLLDP
                     WHRRAPDLVVIMASDLLTSSNFPRLNALSQSNPNTELLAGQLIVSQERVGGLPTFLAPY
                     FPSNAVLITSFKNLSVYYLLGALRRSIVEEPEYNRVATYQSSNDDFVVEDYGKVALIDG
                     IQFAQAAVDGQ"
     CDS             18820..19686
                     /codon_start=1
                     /product="Phage terminase, endonuclease subunit"
                     /label=Phage terminase, endonuclease subunit
                     /db_xref="SEED:fig|6666666.356830.peg.24"
                     /translation="MLTPAQRHFQRVMAERRGQADTETVVSRTAHEQILHRLRLHQATL
                     KQVQSDATKAEMKKAMLPEYDGWIDGTLEGDSGRQDEVIVTLMVWAIDCQDSALTLRLG
                     RYVVKHGLSLPADKFRRDAVTVLAEEVSNPVLTLATTDADADLSGYTAVLDEVAAIVDG
                     KDMPDEVRAKLCKARAFSRRAAVDAQTKAEALTLFREAMARNPNAGVKREIATLTRELK
                     KLMPGSSNEPEDGPPGDDETTTETPPAASADATQPAVKKAAVRNTTARKTTRPTGKSKA
                     ARQSAKR"
     CDS             19785..20276
                     /codon_start=1
                     /product="Phage head completion-stabilization protein"
                     /label=Phage head completion-stabilization protein
                     /db_xref="SEED:fig|6666666.356830.peg.25"
                     /translation="MSLVAQKRVSDSGDVPEIDDGAAAVSTGAFWPVIVLRDLRLAARI
                     TGGITTTRLMHVTTEAVVHVTDQLASWQQTQQATGYAALADVPAGQVNGESIKVYRFRR
                     AVYAIARALLLEGYRDVDTTAKGDKATDTFDNQRDDLWRDARWSIADIRGAQRLFAELC
                     "
     CDS             20276..20476
                     /codon_start=1
                     /product="Phage protein"
                     /label=Phage protein
                     /db_xref="SEED:fig|6666666.356830.peg.26"
                     /translation="MVVRALQGDTVDLLCYRHYGTSAGVTEQVIAANPGLSRQMFLAAG
                     QAITLPDIPRQTEQETVQLWD"
     CDS             20467..20769
                     /codon_start=1
                     /product="hypothetical protein"
                     /label=hypothetical protein
                     /db_xref="SEED:fig|6666666.356830.peg.27"
                     /translation="MGLNDLQRLNDGVTYGLSVMVTGIGVMTVSEKVALAGLVIGVVTA
                     WRAWLFRRRIERAQRRRNELIEQILQQSERRTLNTSERRAVAILHQGDVDDENRD"
     CDS             20753..21298
                     /codon_start=1
                     /product="Phage lysin (EC 3.2.1.17) # Phage lysozyme or 
                     muramidase (EC 3.2.1.17)"
                     /EC_number="3.2.1.17"
                     /label=Phage lysin
                     /db_xref="SEED:fig|6666666.356830.peg.28"
                     /translation="MKTAIKRCSIALIVALGVTLSPGTLRTSPEAQQKTASWEDCRASS
                     YYCPAGVLTVGIGSTGNVQNRAYSNDEIARRWVNDMQRAENCVNGNFNGAAMPQSAFEA
                     MTDTAFNLGCSGLMWFTNRQGSKQRTTIWKHAQAHEWPAMCERLTDFVNSGGQRSTGLV
                     NRRSDFKAWCLRDLAGVP"
     CDS             21295..21729
                     /codon_start=1
                     /product="hypothetical protein"
                     /label=hypothetical protein
                     /db_xref="SEED:fig|6666666.356830.peg.29"
                     /translation="MKLTATLAVLLVLAVSGVLWQTYQRGIDRAHTEALTDSAQQQREL
                     LTEFRALADDARNVLAQVREREQQRYAEGEERREKMREGMQPDTCANTVVPVAVSDSLQ
                     KRAAVQRADTARPGTAQPDGTHTDARTENTGDLGRGRALE"
     CDS             21698..21835
                     /codon_start=1
                     /product="hypothetical protein"
                     /label=hypothetical protein
                     /db_xref="SEED:fig|6666666.356830.peg.30"
                     /translation="MTWGAVALWSDQLLDALDTCNADKAAINDLYLRRLQRLKDAAATP
                     "
     CDS             21846..22304
                     /codon_start=1
                     /product="Phage tail protein # FIG072132 and FIG003673"
                     /label=Phage tail protein # FIG072132 and FIG003673
                     /db_xref="SEED:fig|6666666.356830.peg.31"
                     /translation="MLKTDSLRDALTASNTWCRANPEAFTVFVEEGGIETTGETPSFLY
                     RYSLVLFVMNFTGDIDDFTLPLMAWLWQNQPDLLLNPQKNREVKFTTLINNDDSADILF
                     EIPVRERVKVTRDDNGILRAEHLPEPRPRLTGGVWDAVLDDATGETAT"
     CDS             22301..22939
                     /codon_start=1
                     /product="Phage tail completion protein"
                     /label=Phage tail completion protein
                     /db_xref="SEED:fig|6666666.356830.peg.32"
                     /translation="MTDKLFHALDQVFDDILSGLSPAGRLKTARQVGQALRRSQQQRIR
                     AQRNPDGSAYATRRRKVLRSQQGMIFVWEGQVRHLKNWHGGRGKHGRTITGFDEDRNAI
                     RTFYRSDIERYIEINTQAVRRTTSKTTPMFQRLRGYRFLKMQADTEGASVGFDGIAARI
                     ARVHQYGERDKVGPGAFARYPVRELLGISPADERLIHETVINSLGSAAT"
     CDS             22936..23517
                     /codon_start=1
                     /product="Phage baseplate assembly protein V"
                     /label=Phage baseplate assembly protein V
                     /db_xref="SEED:fig|6666666.356830.peg.33"
                     /translation="MSAELMRLLENLLRVGVVTAVDPESWRVRVKSGELLTDWLRWNTT
                     RAGAFNVWFPPAVGEQVLLGCLGGNPETAVILGSLFSEAHPAPGSSLKEIVITAPDGAR
                     FRYDAVAGALEATGMKTVNVVASVSVTLSTPVVECTQHLKARTVEITHGGTLAGNVAHS
                     GGAMTSNGVQVDSHRHGGIQPGGSWTSGTQ"
     CDS             23514..23882
                     /codon_start=1
                     /product="Phage baseplate assembly protein"
                     /label=Phage baseplate assembly protein
                     /db_xref="SEED:fig|6666666.356830.peg.34"
                     /translation="MTATYTGMNPHGTGTLTDADQLWQSVRDILTTPLASRVMRRDYGS
                     LIPDLLDAPQNAVTRLQLMSAAVIALTRWEPRISLNAVDIRYSASGTVEAELSGLITET
                     MQAASSTLTLRSHGDGDG"
     CDS             23869..24765
                     /codon_start=1
                     /product="Phage baseplate assembly protein J"
                     /label=Phage baseplate assembly protein J
                     /db_xref="SEED:fig|6666666.356830.peg.35"
                     /translation="MATVDLSQLPQPQIIEVLDFEVILQDVKAVMITAFPAAQQASVTA
                     ALSLESEPLTVIAQVIAYREMMLRQRINEGAEACLLSHAVSSDLDNLAANLNTQRLTIT
                     EATDTADAVMEGDSALRLRAQAAFDGLSVAGPTGAYEYFAKSASGKVADAKAISPSPAV
                     VVVSVLSTEGDGSASADLLAAVDAALSTDDKRPVGDRLTVQSAGIVRYAITAVLYRYPG
                     PESEPIQQAAQQALTSWLGTQGRIGRDVARSAIMAALHVQGVQRVELLEPAQDIVISDT
                     QAAYCTGFTVTEGGSDE"
     CDS             24758..25366
                     /codon_start=1
                     /product="Tail protein I"
                     /label=Tail protein I
                     /db_xref="SEED:fig|6666666.356830.peg.36"
                     /translation="MSNSLLPPSASDFMRNVANSTLRLSEIAVCLDTLWDAERCPAQLL
                     PYLAWALSVDRWDKRWSEQTKRQVIKAAWLVHRQKGTLAALRRVVEPFGYLIRITEWWQ
                     TGGQPGTFRLDIGVQDAGITEETYLELERLIADAKPVSRHLLGLNIVMDCAGDIPLAAG
                     QYSGDALTVYPYFPETITISGADKCGGAIHLSDNVSVNA"
     CDS             25363..25908
                     /codon_start=1
                     /product="Tail fiber protein"
                     /label=Tail fiber protein
                     /db_xref="SEED:fig|6666666.356830.peg.37"
                     /translation="MTTKYFALLTNTGAALLANATALGRQLSITQMALGDGSGTLPTPD
                     PAQTKLVNERRRAPLNSLNVDPANPGQIIAEQVIPEDEGGWWIREIGLYDANGNLIAVA
                     NCPETYKPKLQEGSGRVQTVRMILIVSSTDAVTLKIDPSVVLATRKSVDDKAVEAKAHA
                     DGTMASHVNDANPHKQYA"
     CDS             25901..26812
                     /codon_start=1
                     /product="alternative bacteriophage tail fiber C-terminus"
                     /label=alternative bacteriophage tail fiber C-terminus
                     /db_xref="SEED:fig|6666666.356830.peg.38"
                     /translation="MRDWEQIYTTGFRPSPADIGALSVAEFNQSIKSYAPIASPALTGV
                     PTAPTVNSGNNSSQLATTAFVHNALTDNAFVLDFTGTVQNFDVPWDAKSGFYKADVGSH
                     TDAVLHFHGPDASCSALQFAAHYGNGGLSYRTSRDSRGFEHDWEQIYTTGFRPSPADIG
                     AISVSELTGIPLPWPQVTAPSGWLKCNGQAFDKNRYPRLAQVYPSGVLPDLRGEFIRGW
                     DDGRGVDAGRAILSAQTQSIQLHTHDGGITGPATGVIEGYGDGSSGGAPGVDNYNPAAT
                     GAAGGAETRPRNIAFNYIVRAA"
     CDS             26812..27435
                     /codon_start=1
                     /product="Tail fiber assembly protein"
                     /label=Tail fiber assembly protein
                     /db_xref="SEED:fig|6666666.356830.peg.39"
                     /translation="MSEKYSVAVQSARMGKSGLAECAGWLTVYHVDQQTREYTGASYEY
                     MMVGTGLPADSYADTPDLPAAGQALRRSADGAGWEHVPDLRGKTAYRTADGQPQTVTAL
                     GELPDGLTLFSPSTAFDKWNGEIWVTDVAAQHAAAVAAAQQEQAARKATATARITELSY
                     AVELGIATDVEQAALKTWKTYLVQLSRIDTSAATDIDWPEIPST"
     CDS             complement(27464..27973)
                     /codon_start=1
                     /product="Phage tail protein"
                     /label=Phage tail protein
                     /db_xref="SEED:fig|6666666.356830.peg.40"
                     /translation="MMMVYGLFVFELQTLPYQQLQQSRAWRHVKNERINRSAKWQYIGA
                     GEDQITLSGVLYPEITGGEVSLTALTTQAYSGRPWPLIDGTGQIYGMYVLTGMQTTRTE
                     LNRYGKAKKIEFSLSFQRCDEDLREKLQSSSFSDMMDNARSSATKAMNTVSTAMTDTVN
                     TLKGLV"
     CDS             complement(27986..30958)
                     /codon_start=1
                     /product="Phage protein"
                     /label=Phage protein
                     /db_xref="SEED:fig|6666666.356830.peg.41"
                     /translation="MKSLDIRVAFSAIDRLTRPVNAARQSAGGLSESLKRTQAAIKDLD
                     TQSRTFNRLRDSVQKTSRKIDEASRSLDGLKKAQQNNTVLTDKQREHMAALAVKLERLN
                     ITRDQEMVKLRAASQALRGHGVSLVGSNATIQSAIRRTEQYNQTLERERRQLAAVTQAR
                     ARYERMQQTAGKLRGSGTMAVAGGAAAGYAGGQFLAPAVGFDEEMSRVQALTRLDKGDQ
                     QLAALRAQAKKLGAETAFTTRDAASGQAFLAMAGFTPQAIQAALPGVLNMALAGGMELG
                     ETADIGSNILSQFNLDASQMDRVGDVLTGTFTRTNTDLFSLGETMKYTGPVAAKLGISL
                     EYAAAMAGMLANNGIRGSDAGTAMRASLARLASPPKAAAEALKELGVSVADAKGKMRPM
                     QDVLRDLYKATKKYGQVDQVSFFKDIAGEEAFVGLQTLVQSAGSGKLDKLFQELLKAKG
                     ESATVGKKMADNLGGDLKNLDSAWEGFRIQVEETADRPLRNLTQGLSDVITNVSGWVKE
                     NPRLTQTLLLAVGGAAAFAVAIGGTSLAIGLLMGPLAKLQLGFSLLLGARGVGGAVSMF
                     SGLSSLLGGPMARIGGWLQLFSGSTGRLTATLTPLRGMLLAVFTSPVSALGSLVRGVGG
                     LLLRLSGLPALWSLITGAVSVLGGVLSLLLSPIGLIGAAFVAAGLLIWRFWEPVRTFFS
                     GMFTGIVISLGPIRQAFTGLAPVFDVIVSAVSRLWDRFTQLFQPIQTTKKTLDDCAVAG
                     YGFGKVLGSALDMLLLPLQKLMEGIGWILEKLGLIPSGLDAAQKKADQLKELTPEGKDR
                     LQGLVANLTGDLKEATTAPPPAPKPPLTGDSGTQRRLQKIADNTGGVLEETKKRIGPGD
                     IVFKNLPKALAVRGEWQESRLTGGTPSAPSQPAQTMQALSDRPAVVAATQPVKQADASP
                     VSRPAARTPAAGGFNGEIHIHLHGVERQDARELGRIVADAVSAELARRDRLQRGSFRDR
                     E"
     CDS             complement(30945..31103)
                     /codon_start=1
                     /product="hypothetical protein"
                     /label=hypothetical protein
                     /db_xref="SEED:fig|6666666.356830.peg.42"
                     /translation="MQFDQIDDLVADIAVVFNWPPSELFSMDLGEVIAWRTRAAIRSGA
                     SEADEKP"
     CDS             complement(31109..31426)
                     /codon_start=1
                     /product="putative phage tail protein"
                     /label=putative phage tail protein
                     /db_xref="SEED:fig|6666666.356830.peg.43"
                     /translation="MNTPNNNTVTLATPIMRGDSTISQVTITDDIKQAGSLRGLRLVNV
                     LNMDVDSITTLLTRVTSPKLKLAEINAMDTRDFMRLAEAITPFLVHVEPGEPNAEVTEE
                     A"
     CDS             complement(31474..31989)
                     /codon_start=1
                     /product="Major tail tube protein"
                     /label=Major tail tube protein
                     /db_xref="SEED:fig|6666666.356830.peg.44"
                     /translation="MAVPHKLRLFTCFVNGNNQIGKVTSVTLPKLTRKTEDFQGAGMIG
                     SVAVDLGMDSGALEAQMVVGGMEKKLLLEYGGDIDDVRLRFAGEYYTDGDSQLVEVEMR
                     GRITEIDGGESKQGEDTSVTYALKNTYYKLSIDDQSVLEIDLLNFIYKKNGKNIYPDRI
                     TSALGLGN"
     CDS             complement(31990..33168)
                     /codon_start=1
                     /product="Major tail sheath protein"
                     /label=Major tail sheath protein
                     /db_xref="SEED:fig|6666666.356830.peg.45"
                     /translation="MSETRFHGVRVRENTDLVTAINDIDSSVIGVVAVAEDADADTFPL
                     NTPVLITRVNSVLGKAGKTGSLYKTLKAISDQTSPKVIVVRVAAATEGGDKTQSQLIIG
                     GTAADGSYTGMYALLTAEAKVNYRPRILAVPDYDTAEVTSALCVIAQNLRAFVYAGCHG
                     CTTMAEAITYRAQFAYRELMLIWPDFIAYNPLSGSNETFPASAYACGLRAAIDNDQGWH
                     KSLSNVAVNNVLGISRDVFWSLQAEDSDANELNNQEITTLIKRNGFRFWGNRTTDIHDY
                     LFEVYTRTAQILADSIAEAQFEAVDEPLTPANVKDVVNGINGKLSALVTAGRLIGGECW
                     FDIQDNPTTGLRQGQVRVRYKYTPVPPLEDLTLYQTFTDDYFDSAFSSLGGV"
     CDS             33298..34461
                     /codon_start=1
                     /product="Gene D protein"
                     /label=Gene D protein
                     /db_xref="SEED:fig|6666666.356830.peg.46"
                     /translation="MRENKGETMAITDLADSLITTAKRYDDALTEAVKSPAFSITLGGK
                     SLKELSDRLISLSLTDNRGFEADQLTLSIDDSDGRVELPPRGAQIALSIGWQGEALTYK
                     GLYTVDEISHEGPPDVLGVTARSADFREEFNVKREVSWHDVTVERVVSAIAHRYGMKAQ
                     ISNILMNIEIDHADQTEESDMSFLTRMAEQLGAIATIKNGTLLFILPGGGVTASGKALP
                     SASITRSSGDGHRFRIADRDAYTGVRAYWLDLKFGKKKKVSVKRRRTKPKPKKEKSSSR
                     EGDYITGAEGNVFVLRKTYQNEETAKRAAAAKWRQLQRGAAEFSITLARGRAELYPEMH
                     LTVSGFKPDIDNQDWIIARAEHVIDGNGFTTRLELEAKIPDWIAESE"
     CDS             34525..34746
                     /codon_start=1
                     /product="hypothetical protein"
                     /label=hypothetical protein
                     /db_xref="SEED:fig|6666666.356830.peg.47"
                     /translation="MARTRTSRRLSDITIRQYHQCQNLECSETFTTLNTIERRVSKRTR
                     EDPLPPDFIPQDAFPASHYGRDQLNLAL"
     CDS             complement(35027..35164)
                     /codon_start=1
                     /product="hypothetical protein"
                     /label=hypothetical protein
                     /db_xref="SEED:fig|6666666.356830.peg.48"
                     /translation="MRTVVIGFILHFCPFNQSLDLAKITQTMAPNNLFGKLRGYSANNE
                     "
     CDS             complement(35367..35480)
                     /codon_start=1
                     /product="hypothetical protein"
                     /label=hypothetical protein
                     /db_xref="SEED:fig|6666666.356830.peg.49"
                     /translation="MSVIWQVAAKWQQSGSTRFSGTKKAVFNQLLLLTLIE"
     tRNA            complement(35550..35633)
                     /product="tRNA-Leu-TAA"
                     /label=tRNA-Leu-TAA
                     /label=/transl_table=11
                     /note="/transl_table=11"
                     /db_xref="SEED:fig|6666666.356830.rna.1"
     tRNA            complement(35645..35715)
                     /product="tRNA-Cys-GCA"
                     /label=tRNA-Cys-GCA
                     /label=/transl_table=11
                     /note="/transl_table=11"
                     /db_xref="SEED:fig|6666666.356830.rna.2"
     tRNA            complement(35744..35816)
                     /product="tRNA-Gly-GCC"
                     /label=tRNA-Gly-GCC
                     /label=/transl_table=11
                     /note="/transl_table=11"
                     /db_xref="SEED:fig|6666666.356830.rna.3"
     CDS             complement(35849..35968)
                     /codon_start=1
                     /product="hypothetical protein"
                     /label=hypothetical protein
                     /db_xref="SEED:fig|6666666.356830.peg.50"
                     /translation="MNIDRLALKNSKRSKRGDNFIDSPRQVSRMHRIDRNIVY"
     CDS             complement(35974..36507)
                     /codon_start=1
                     /product="CDP-diacylglycerol--glycerol-3-phosphate 
                     3-phosphatidyltransferase (EC 2.7.8.5)"
                     /EC_number="2.7.8.5"
                     /label=CDP-diacylglycerol--glycerol-3-phosphate 3-phos
                     /db_xref="SEED:fig|6666666.356830.peg.51"
                     /db_xref="GO:0008444"
                     /translation="MRFNIPTWLTLFRVVLIPFFVLAFYLPFSWAPMVCASIFVFAAVT
                     DWFDGFLARLWRQTTRFGAFLDPVADKVMVAVALVLVSEHYHSWWITLPAATMIAREII
                     ISALREWMAELGKRSSVAVSWIGKIQNYCADGCAGRFVVATGAHGGGCWRGCFVCGRCI
                     DVLVDVSISERSLA"
     CDS             complement(36565..38397)
                     /codon_start=1
                     /product="Excinuclease ABC subunit C"
                     /label=Excinuclease ABC subunit C
                     /db_xref="SEED:fig|6666666.356830.peg.52"
                     /db_xref="GO:0003677"
                     /db_xref="GO:0004518"
                     /db_xref="GO:0005622"
                     /db_xref="GO:0006281"
                     /db_xref="GO:0006289"
                     /translation="MTERFDAQAFLKTVTSQPGVYRMYDASDTVIYVGKAKDLKKRLSS
                     YFRAHVASRKTEALVKSIRQIDVTITHTETEALLLEHNYIKRYQPRYNVLLRDDKSYPM
                     IFLSGDEHPRLSVHRGAKHAKGEYFGPFPNGNAVRETLMLLQKLFPIRQCENSVYRNRS
                     RPCLQYQIGRCLGPCVSGLVSDEEYQQQVEYVRLFLSGKDQQVLTRLIDRMETASSKLR
                     FEEAARIRDQIQAVRRVTEKQFVSGDGDDLDVIGVAFDAGMACVHVLFIRQGKVLGSRS
                     YFPKVPGGTELAEVVQTFVGQFYLQGSVFRTLPSEILLDFSLPEHQLLAESLTDQAGRK
                     IQIQTRPRGDRARYLKLARTNAHTALTTKLSQQSTIQQRLTALASVLGIEKIKRMECFD
                     ISHTMGEQTVASCVVFNADGPVRSEYRRYNITGITPGDDYAAMNQVLRRRYGKSIDEDK
                     IPDVIVIDGGKGQLAQAKGVFASLQVPWDTSRPLLLGVAKGSDRKAGLETLFFEATGEG
                     VALPADSPALHVIQHIRDDSHNHAISGHRKQRAKVKSTSSLETIEGVGPKRRQILLKYM
                     GGLQPLMNASVEDIANVPGISHALAEKIFHALKH"
ORIGIN
        1 atgaatgaaa cagataaaag tatcgtctcc ttatttatta ttggcacact gattgccgtc
       61 ggcaaagtat tgtcgggtag tgaacccatc acactccgat tatttattgg ccgagtaatg
      121 ctgggcggct ttgtctcaat gatggcaggt atcgcactgg tacaattccc cgatctgtcg
      181 cctgtcgcca tcaatggcat tggcgcagct cttggcatcg ctggttacca agctattgaa
      241 ctgcttatcc aacgtcgtat tcggcaactg ggtgaacagg ctgcaccgga gagaaaagat
      301 aatgctcagt aactccccaa acctgactgc gtttttggat atgctggctt tttctgaggg
      361 tacagcgacg catctactca cccgaaaccg cggttacgac gtcattgtca ctggcatcga
      421 tggcaaacca gaaatattca ccgactacca agatcatcca ttcgctaatg gtcgaccagg
      481 taaagtattc aataaacaag gacagcgatc caccgcagcc ggtcgctatc agcaactcta
      541 cctctattgg ccaacttaca aggcacagtt gaaactaccg gatttcggcc ctaattcgca
      601 agatacgcta gctattcaac tcattcgtga gcaacgtgca ctggatgaca ttattcaagg
      661 ccgaattgcc catgccatca cccaatgcaa caacatctgg gcttccttgc cgggggctgg
      721 ctatggccaa cacgagcatg acatcgaaca cctgctcacg gtataccaac aagcaggtgg
      781 ggaggtggca tgaaaagcag catgatcatc gcggtcatca tgatgctgct tagcgccggc
      841 gtgggtgtgc agtcctggcg gctgcacacc actctccagt taactgagca acaggcacaa
      901 acgttgtcac tgcagcaaac cgagctggat gaaaagtctg gtcagttaaa aacgctgtct
      961 gagcaagctg aacgtaacaa cattgaacag gcacgattac gcaacatggc tgcagatact
     1021 caagcagcgc tctctgaacg gcagaaagtg ataatgagat tacaacatga aaacgaagaa
     1081 cttaaccgct gggctagcac tacccttcct gctgatatta tccggttgcg ccagcgcccc
     1141 gccctcacaa gtggccgtgc ttaccgtgaa tggctgtccc agactgactc cgtgcagatt
     1201 tccagtagcc aacccacaaa ccaacggtga actaaataat cttttggatg aaacagaagc
     1261 tgcgttggcg acatgcgcag accaggtgga tactattatt gcctgtcaga ccaaaaacat
     1321 taccaccgta gcaggtatac aagccacatc ccctgcactt ccaaccgaaa aaaggagtat
     1381 ccctggagag agcagatgga ctgatattcc tgagtaaaac gatatctgtt cgaccagctt
     1441 actgaataaa gacaagcagt ttttggacaa aaatatcaag caggaggagc acgctcacgt
     1501 tactttagtt caatacattt tttgatttca ggatttccat catcagtggg cattattatt
     1561 cagggactca tggaagtgat cgttgccata ttcatacaat cacacaccgt gatttccctg
     1621 acgtcactca atcttctgaa ccagtagaaa cgccttactg gcttcacagt aatcatgcaa
     1681 aatgacaaat aaacgttgac tataaaaatt tcatacagaa aaaaacatta ttaaagaatg
     1741 gcccagacac aaaaaaaccg cctcgtggcg gtcatgttat tttaattatt tctttatatc
     1801 acaagcactt atcgcatggt gcccagagcg ggacttgaac ccgcacagcg cgaacgccga
     1861 gggattttaa aaagttaatg cctgcttttt atatcataga gttacgttaa ttcaatacgt
     1921 tagcagtatt caattcaggt taatgcgagc taatacggaa atctgctgcc atcgatttaa
     1981 cgtggcagcg ccccatgatt attcatctgt ggttaaagaa tcaaacgggt tgagagttac
     2041 cgccgcatcc agatgatccg gcgcgaaatg cgcataccgc atggtcatag tgatagagct
     2101 atggcccaat atctgctgca acaccagaat attgccgccg cgcatcatga agtggctggc
     2161 aaagctgtgc ctgagaacgt gggtcaactg cccctcaggt aattcaatgt gcgctttctt
     2221 taaggcgtgc ttaaatgcct catacgctgg tttgaagagt tggccgcgcc gcttgggcaa
     2281 caaggcgtgc attctttcag aaataggaat ggttcggttt ttctttcctt tggttttgac
     2341 gaatgtaatc ctgccgggaa ggatttgcga ttgtttcagg gtttgggcct cgccccaacg
     2401 cgcccccgtc gccaggcaca agcgaacgat gataccgaga tctttattct ctgattcatc
     2461 gcaggcagca agcaggcgct taatttcatc cgggtagaga aaagccagtt cctgatcgcc
     2521 ttccttaaac tggcgtatgc catccagcgg gttttctttt tcccactccc ccatgcgctt
     2581 cagctcagag aacaccgccc gcaggtagga atattcgcgg ttaactgtgg cctctttgat
     2641 ggccgtcttc ccttttgggt tccattcacc ttttaaccgg cgttcgcggt aaacagcgaa
     2701 catattttta tcaacgtcta ccgcaaaggg attacccagc cgaacacaga ttgccatcag
     2761 tttagcgtag cggtcttcac ctgactccag cgtctggcca tgcatgtcgt accatcgctg
     2821 gatcaggtct tgcagcgttg tgctgttggt ttcggttgat atcccttttt tatccgccat
     2881 caggcggcgc tcatacgcga gtgcctcacc tctggtagta aattgtttac gaacgcgctg
     2941 accatcgcgc ccatagggga agcattggca aagccatttg ccggacggaa gtttgcttac
     3001 agccatataa tattatccag taaagctctg ccattgttct tcactgatta ttttcagtgg
     3061 aatgccgcga ttatcccggt agtctattgc tttttcgatt ttccgaccgt gagcctgata
     3121 tctccaatgt ttacaactca atgtaccaat aataagaaaa tcaagttttg ctgttatatt
     3181 atcaatcacc ttcccgcctg catcttcaat cagtttttta cacactgatc tttttccata
     3241 aaggaattca cctgtcagac aaactgttgc attggaaaga actaagctct ctatatcatc
     3301 cactggtaag cgagttgcca gcccatccac tacaccggaa tcgacatcac ttccggtaaa
     3361 agcgattaac gcttttttca attcatcacg ttcttctgat gtaatgatcc catcggcaag
     3421 aatccggtta accaatgcgt ataactcttt tccagggtaa ttaactttga gcgaagcatt
     3481 agatgatagc caccaattta agtatcttat ttctgaatca ttaagctcat gattcgccat
     3541 cattccttta cataggcctt ccaataaatg cttgtccgct tcatcagagt acaaatcaag
     3601 ctcaggtaaa tcagacagct ctttttgcac cttgatcaaa tcagctttca aataattcaa
     3661 ttcatacggc tcaataacgc catcagacaa tatatcggaa agtctatttg aaatcatccg
     3721 cacacaatag tttttgctga ttaaatcagc atcttttatc catgtatcaa gaaacaaaac
     3781 ttctttctca tctatatgac catcacagtt tatgccctca atgatattga taaggttaat
     3841 aattaattta tctttattcc ttttatagtt aaaaaaatct agtttttcat ctgccatgag
     3901 gttttccttt ggtattaatt ataatttcaa agtcaactta taactacatt cccaaccggg
     3961 aaattactta ctcagaacaa tattggcaaa tgtttctagt taccaccaaa taaatttaca
     4021 cgcactggtt tttttccttc atccttcttc cagtagtagc ctgactgaag taatgagata
     4081 agttcgtcct gagttatttt tatcgtatca aacaggtcaa ttttacttct atcaatacta
     4141 ggtttgaata tatccagtgt tattttgccc ggatcataac tctgactttc tatcatgatt
     4201 ggcaggttgg ttaacttttt aggcgttagt tggtgatatg gaataaaatc acctgaaaag
     4261 aaaccatcaa tagttgcaac cggatcataa ccagaaaaac actcatattt gacttgtagt
     4321 acaacagcat ctggtatttt taaaaattca ctccactcac tataacccag tttatcacta
     4381 taaaagacat cacctctacc gaaagaaaaa gaactacctt gcgtccaatc ctcatattga
     4441 tgcttattaa aaacaaattt agttaatttt atatctagtg catcacggtg ggattctctt
     4501 attgcaaagc gccaaccaga ggcataacca tcaacaaaac gagcaataag ggctgtgctc
     4561 ctgcgcggtt ctctgatagt tcgaaatgtt gaagttactt cattgtgcaa attttctatt
     4621 ttttcatgta tatctttttc gtcagattca taagcctctg tcgattctat tggaatctcg
     4681 cctgtgtcaa taaataacaa gaattgatct ttggacagaa taaagcagtt tttctcattt
     4741 gcctgtttta ttttcttcca tccagcatta gggccacaac acaggaaata taatttggct
     4801 gtaatccctt ttctgactga cagtcctttc ttttctgcga gtgactctag atcatcttta
     4861 atctctttag aaaaacctgt aaaacaaatc tccaaaccac gaggagtatt tttctcacgt
     4921 cgatcttcaa tcttgagatc tgcgatagtt aaaggactag cggcagaaat catttcttca
     4981 tttgaagagt aaacatccag tactctttca agtttgaagg ttctaaaacc tttcttgttg
     5041 atgcaatacc cttgaagata attatcttta tatactgcat cggaaacgta attattagac
     5101 acctcattat tagcattaat ataagtaaag aatatttctt tctcgttttt tgaaatccat
     5161 tcttcaaatg tcataaaaag cccttctata aatagctatt tgatttatct atctttagag
     5221 ttgagatatt ttttatgtta cttatcgata cgtctaacga aaaaaaatag cgcccataat
     5281 tattccagca gtaaacactg cactgaaaat caatggttct gctttaagta catcttgcca
     5341 gctctggcga gtattaggcg tggtttgacc gggaacggcc gaacactgac gatcatccaa
     5401 ccatgaaagc gcctgctgga gctgcgatcg ggtcagttca gttaatcgtc cagtaccgaa
     5461 atgaatatgg cagtaatgaa ttaattgctg ccgctgttct acctgctgag tgttcttcaa
     5521 cagcagatgc accagcgcat tactggcatc tttttcccga tatctgtcgc gcaacgcctg
     5581 aagataactg accgccgttt gatactggtt gaccgtcata tcctcaatgc ttttgacgcc
     5641 aatttcagcg tgaacgcgct gccacactga aaacccctct tcatagccgc cgtcagcaat
     5701 ttcttttacc agttggttta actgcttacg ctgcgcggga accagtgggc gtttttcttc
     5761 attggccgcc ggaatggcga tattgatctt atcgaccgtg atgctgcttt cgtaaaaatc
     5821 ccgcccggct acccggtttt catttccatg agattcaaca ctcattcctg gagcgttccc
     5881 ttattttttg ttttcgtgat agtccctgcc agcaacacgc tggccgctac cggttatgtt
     5941 tattgatcct gctgatgcgg aactgcctgc cgttaatgcg gccagtgcag cggctttaac
     6001 cgccaacggc gcaacacgat aaatttttat cagttctaat tcatcgttag atatgtcacc
     6061 gagatcaggc gtccgctttc cggtaagaat atacgaaaca tccataccat accgagcact
     6121 gagaagagct agagtcactc cgtctggagc ggtttcccct ctctcatact tgccccaagt
     6181 ccttgttgtc gtgcctagct cttcggcaat cgcactttga cttttaccaa tcgtttcccg
     6241 ctcttcgcgc aaacgctctc caataaggaa taaaaattcc tctttcgatg ttgacatagg
     6301 aagttttctt cactagattg tgttgaacag gaacttagtg gatcacaaca taccattatg
     6361 acacaagaaa atcatgatca gcggtcgcgt ttaccgcggg ggattgcatc gcgcaaccct
     6421 actcccatga ggctttccga agatgaacgc gccaggctgg ccgcgttggc tgaaaaagaa
     6481 agccgttccc tctccagcat ggcgagactg gtttttctcc gggggctgga gtcgtttaac
     6541 gctgaaggat aggcgatatg agtaaaggat taaccatcaa tatcaatgtc ccgacgccgt
     6601 atgtttctct caggaaatac tcagaattaa cgggtatccc ctttgaaact tgtcggggca
     6661 tggtaaaaag cggaaaaatc attatccggc caaaagaaaa agcaaacgag aaagtagagg
     6721 tgaatctcgt tgctatgctg cgcgatgcca ttgccagcag tgaaatataa aggagccaca
     6781 tggagaataa aaaatcaggc caccaatacg caataacaca attaagcaaa cacacaaatg
     6841 tatatcgggg cttctcgatt attaaatgcc cgcgaacaac attaaacccg attacccgat
     6901 atcgtgttag tcaggctggg caatcttacg gtttatttga tgcgctggca ttagccaccg
     6961 gttatatcga taacctttac acagtgaggc gataatatga tttccatagc tcgtctatta
     7021 acttctcagt caccatcacc agtaatacct agtcagggta aaggctggct ggaactgcca
     7081 aacggccaac gcgttaagcc gtccgttaat caggtctatt tcgcaccctg gagccaaaag
     7141 ccctacatgc cagcgcctaa gcaaaagcgc cgctggtttt cccgcctcat gggtattgcg
     7201 gcgtagcgtc atggctaata ccgaacccgc tcgcgccatt ccgctgagta tcgcggaaag
     7261 aacagacggg ctaaaccaca tagcaatgct gcgagggaaa cacttcaaga caaacagtga
     7321 gaaagaaatg tgccgcttta ttgatgatat gcgggacaag attgatgacg attaccataa
     7381 gaatatgcgc gtactgtcgg caatatttga attagcggat attgataagg aacggcatca
     7441 cctgaaattt aatgaactga ccactgacga gaaagaaagg ctgattaaag caatgaataa
     7501 gctccgcgca gttgtgagtt tattccccaa aaacttaatt cttccactgt aataaaaaac
     7561 ccatttttag gcgtaaaccc gccgggcttt ctattacctg aaaaaaggaa accgcaatga
     7621 aaaatgccga agtaacccac atcactgtcg ccgctgatgg cgcactggct gagctgctga
     7681 aaaaagccag actggaggaa cgcaaagacc agcatttgtc cttctctgtg cgccttgccg
     7741 cgctggctat ccatgcccag caaaaaagcc tgtctgccgc cgaagtggtg gagctgatgc
     7801 gccaggaatc agaacgtttt gagcactccg ttcaggggtt gagctgatgg actccatgga
     7861 catggctcag gaacgcgaag cgttcatccg tgaaacacaa atccaacagg cccggcaaca
     7921 gtcgggctgt gccgtttctg cattcatctg tgaaagctgt gacgccccta tccctgaagc
     7981 ccgtcgcgtg gccgttccgg gtgtgcgtct gtgcgtgtac tgccagggcg atgcagaact
     8041 taaaaacaaa cactatcggg gtgctttatg agcattattg ccacaccgct gaaatgggtc
     8101 ggcagcaagg cccgcgtgat ggatatcctg cgcgaacatt taccggctgg tgatcgtctg
     8161 gttgagccgt tcgccgggtc gtgctcggtc atgatgaata ccgattaccc ggaatacctg
     8221 attgctgaca tcaaccctga cctgattaac ctgtatcagg tcatcaaaga ggatttgaag
     8281 gagtttattg atactgcaga aggtctgttt cgcacggcga atacagcaga aagctattac
     8341 cgcttccgtc aggtatttaa ccgcagcaaa gagaatcgca ccacctcagc ggcactgttt
     8401 ctttatctga accggcacgg ttaccggggc gtttgtcgct ataaccgcgc cggtgggttt
     8461 aacgttcctt acgggcatta tgcatcgcct tattttccat tggccgagat tcatgcattt
     8521 gccgaaaaag cccgccgtgc aaaattcatc tgtgctgcgt ttggcgaaac attgcaactg
     8581 atccgccccg gcgatgtggt gtattgcgat ccgccataca tcccgcaaac accaacagcc
     8641 agcttcacca gttatcacac cgatggtttt acccacaatg atcagtatga cctgtgcagc
     8701 gagttatcgc gcctgtccga gcgcggaatc cctgtcatcg catcaaacag cgacactcac
     8761 catgcacaca gcctttacca ccggtttgat atctgccgct tcaccgcgcc gcgtagcgtc
     8821 ggtgttgcgg ctggggagag caagcaggcc ggggaaatca ttgctaagcg tctgccgatt
     8881 cctgccgccc gaagcctgtc gaaagtttgc gacgggtgcg gctatgaagg tggtgggcac
     8941 tgccctgact gtgggccagt tatgggtgat gccacctatc aggaaatggt ggcatccggc
     9001 gcgttggatg cggagccgtt ctgaatgcct gaacagtggg cctacccttg gaacgctcca
     9061 cgcccggcga tctccgcacc gtcgggcgtg gctgatcttc gcccttctct actcgttacc
     9121 gatgctgaac cgcatcccac tgtcacacgg catctgagcc ggatggttaa acgcgctctg
     9181 gctgcgccag gtgatgacct gaatcttaat caagccgtag cacagttgga gcactgggag
     9241 ccgaacggca ctcagttgca tatccggcgc ggtctggcgg aaatagtgcg ccgggatcat
     9301 caggaagcgg tcagcggttg gatgaaaacg ccggaaggcg tagaagcccg cttgcacgaa
     9361 caaccgtttt ttatccgtga cgtttaccgc caaaaaatcg aatggctacg tgcaaaccgc
     9421 gagccgcgac acatcagcgc ctttttcatg ggaaccgtga aaaaagccct gctgcgtctg
     9481 gatgctgtgc gcgcacagca aggtgtgcgt gatggctttg catcggaact ggcggcctat
     9541 tgggggccgc gctgggtgca tctggcagag tttaccaggc atgaggtgat caatgccgcg
     9601 catacccttg cgaccgccat cgccgaaatg tttgaaacag agtgcggcca cacatcaccg
     9661 gaagacatga ccgacaataa aattcagtgg ctgtatcgcc atttggggta cgaactgctg
     9721 gcattgcgtg taacgccacc atgctggggg ttggttatcg gcgatgaaca agcccggcac
     9781 cgcatctatt ccgccatttt acgcatcact tcacctgaat ggtgggggcg gaaactgtgg
     9841 cgactgcgtt gtgaatggcg ggaaaatcag tttcgcgcca tcggtgtgat ccacaaaaaa
     9901 cgaatgccgt atgtcagcct tgatgccctc aaccagtggc aagagcagcg ccgcaagaat
     9961 cgcgcttttt tccagacaca tgaactggtt gatgaagatg gcaacatcac atctctggaa
    10021 aacatggtgt acggcagtat cagtaacccg gctatccgcc gtcatgaact aatgacccgt
    10081 atggctggcg ttgaaatggt ggcaatcgcg cggggtgatg aaggtgtttt ccttactatc
    10141 acctgcccgt cgcgttacca cgctaacatc cagaacggtc atcaaaatcc taaatgggat
    10201 catgcctctc cccgtcaggg gcagcggtat ttgtgccgca cctgggcgcg tgccatgtct
    10261 gcgttgaatc gtcgtggctt gcgcccttat ggctttcgcg ttgccgagcc gcaccacgat
    10321 gccaccccgc actggcatgt gttgctgttt atgccacctg ccgacagaaa ggccatcact
    10381 gatatcttgc gtgaatattt tattactgaa gaccgtgcgg agctggggcg caacaccggc
    10441 gcacgattca aggctaaaaa gctcgatcca agaaaaggca gcgctacggc ttacgtggcg
    10501 aagtacatca gtaaaaatat cgacggttac gcgctggatg gcgagctgga taacgaaacc
    10561 ggcaagccat tacgcgaaac ggcaaagttt gcgatggcct gggcatcaca acataacatc
    10621 cgacagtttc agccgttcgg tctgccgccg gtaacggtat ggcgtgaact gcgtcgcctg
    10681 gcaaaccaac ttaccgcagc ccagaaagaa agcggcacgt ttaaacgcgg ggccgcgcag
    10741 cttgttgacc cggcaatgga tgcggtgctg gcatcggctg acgccggttg ttttgccaca
    10801 tacatcgaaa aacaaggcgg cgtgttgatc ccacgcgagc gctacaccgt gcgcattgcc
    10861 tatgaagatg ctgacgaaca aaacacctac ggcgagacac cggaaaaaat cttcggtgtg
    10921 ttctctccac gtctgggggc gatatcccgt atctgcaccc ggttaatcaa atggaaaatc
    10981 cgcaagaagc agtccgctga cgatggtgcc agcattggca ccgggagtgg tttggccgtt
    11041 acgtcgccaa ccggcgacgc ttggagttct gtcaataact ctacgggcga tgaaaaaaca
    11101 gccattccgg caggtataga cggggatgac tatggtagct gtgaagcgcc agatggagag
    11161 cctggcgata catccgctca aaccttcgcc gacttcgagc gcatgacaga cccggaacgc
    11221 cgggcgctgc tgtccaggtt gcgaacacaa ccgacggatc ggcggaataa tcaacactcg
    11281 tccactactc aacggaacac atcggctgaa aaacaggtgg ttggcaaact gccggacgag
    11341 tggcgagcca gtattgccga tttcgcccgc tcaatcggct gggatatcaa caccggtgag
    11401 ttgcagcgac ttgcggcagg caatgcgatc acatttgccg atcattccta tgtcgccagt
    11461 actgatggtt gcctgtaccg cacgcagacg agaaagcaaa aagaaacgga atatcaggat
    11521 aaagcaacgg cattgctgca acgcatcgcc gtgttacgtg atgtttcata gtcataaccg
    11581 gctgtgctgg ccagagtcaa aacgactgcg ctgcagtaca gataaaaaca tctatgtggt
    11641 accacaaggg ggagttatgg caatgccagc aggtaaagaa gtgcctaaat acacaattaa
    11701 agaactgaaa ttaatgggtg tttcatcgcg attacagacc atcatgatca atgaaaattt
    11761 aacaccaggt gagcttgtag ggtgtgctga atctgtcagg aatggctacc aagctttgaa
    11821 atgtgaaggg atgaccgctg ttgacggtga attacggtgc tcattctgta atgtaccgag
    11881 ggctgaagct aagaaactcg tcgtcgggct ggggaatgta tgtatctgtg ataagtgcgt
    11941 ttggctttgt gtcggaatac tcaaaccaga tacggaggca aaataatggg ctatctgggg
    12001 agtaaggccg cggctggcgc atatcagaaa attatcgcgg cgatgcctcc gcatgatacg
    12061 tacatagaaa cgcacctggg cggcggcgca gtgatgttga gaaagccgcc gacattgcgg
    12121 aacgtcggga tagatatcga tgaagacgca ttgaaaaatt tcgcgtttac gcacaagtta
    12181 gcaaacgtca acctggtgcg ccgtgatgcg gtggaatatc tgagtatgtt cgacttttct
    12241 cgcgcgggcc gagtactgat ttatgcagat ccgccctatc tgcccgaaac ccgcaccagt
    12301 cggaacagtt accgctacga atacaccgcc gatgaccacc gggcattaat cgccaagctg
    12361 cgacgtgtcc cggccagcgt gatggtttca ggctaccctt ccgcgcttta tgatgaactg
    12421 ttgtatgact ggcgcgctat tgagtttcag gtgatgacgc gtggcggtgt caggacggaa
    12481 aagctatgga tgaattatcc agagagcgcg gcatatagcg cgtcgtttgc ggggcaagac
    12541 tatatcgatc ggcaacgcat caaacgcaag gcggagcgtt gggcagcaaa gtatcgggca
    12601 atgcccccgg ctgaacggtt agcaataatg gccgaaataa tgaaaataga cggcgaggca
    12661 taagatgatt agatttttaa ttagacaatt attgcattaa ttagataaat atcttattat
    12721 cagttcatcc caagcggata tgctctttaa aaaccgagga aacagatggt aaaggtaatc
    12781 tggacaagga aagcgttgaa acaacgttca acgatagacc gaagatatca ggacaccatt
    12841 agtgagaaag tcgccgagtt ggagaatttt cccgctgtca aactcgatat taccgcgttg
    12901 aaaggtgagg ccggtaaatt taggttacgc gtgggagatt acagagttat tttcgagatc
    12961 attaagggtg aacctgttgt ttgcgaggtg caggcggtca agcgcagaac ctcaacaact
    13021 tactgactat caggcggggt agcccgccag tttccttatg acatacaccg cgactcactg
    13081 acacccggat gaaattatgt caaaactaca atttatcaat gacgtgaacg gcaagcctca
    13141 gtttgtagtg ctgccaatcg gcgaatatga aaagttgatg tctgatagcg atgcaggcta
    13201 tgaagagatc ccttatcttg ctgatgagca tgataacgaa accgtgccta acgacgtggt
    13261 agaaatcatg tttcgtgacg atatcagcct gctcgctgcg tggcgtgttt atcgtgggct
    13321 gtctcagtac gatgtcgctg aaaggctggg tacaacacaa tcagcagttt cgcagtggga
    13381 agcgaaagat tcgcgaccgc aaaagaaaac ccgtcagaag cttgctgaac tgtatggatg
    13441 ccgtcctgaa cagatgattt tgtaaattta taaccttctc tgaaacctgc ttcggcaggt
    13501 tttttttgcc ccaaatgcgc cgcacaaacc cgcacaattt tgcacaactt ttttgatgct
    13561 atttttcccc tttccgcccg gtacgcacgc gcgccgggcc ggtttctgca cttgcacaaa
    13621 aaatgaagcg aaagcagcgc gcaggtgacg ggggaacagc ccccgcgatg ggggtaggta
    13681 gggatcccct ttgatgtgcc aaatctggca catttcccgg cctactgcgt gcgtatttcc
    13741 gttcgggaga cacggcgcgg catccggtga gagcgcccga tagcgtagcg ctgaggcggt
    13801 tttatgcggg tggataattg tggcgttagc cgttgatctg aaaagggatt gcgtgcaggt
    13861 gacgtgaaag tttttgaata aaaaccgccg cgtgagtgcg acggcagtgg cgggatatca
    13921 ctcggttttc aacagggcgt aagggttaaa gcggatcacc tccatcccca gccagtcatt
    13981 cacatgcttc agtgcttcca tcaccggcat cagttcgttg atggcgaaca cccgcgcggc
    14041 cttctccaca tcgccaaagg agccgttgcc ttccggcata gcgcccatca gttgcggcgg
    14101 tacacggtgc gctgccagaa tgtcatcgcg cgtcaccgat ttgatattca ggaattcatc
    14161 tttggcagat atctggctga agggaataat ctgtacccct ttttcaccgc cgcccggcgc
    14221 atgtaacagc aggtttttaa acgcgccttt accgcgcgct tctttgagcg ttttcttcac
    14281 attatccatg ctttcggtat ccacctggga tgcgccgatg tagataatgc acccggcgtg
    14341 cgaaccgttg tcatagtaga gcttgcggaa catatcggca gagtgtgaca ggctggccga
    14401 cagcaacgcg cccatgtact ccggcatacc gtagatctcc tggtgaatat ccgggttgat
    14461 gacgtggcac acgctgtcgg tatcaaacgt gtgttcatct ttccactgcc ggataaacca
    14521 ataggtatcc agatcgctgc cgcgccgggt gtacttggcc ggaacgtgac gcagggccag
    14581 cacgccgccc agccggttga cccgtcgttc aagataaccg ttgccgaaaa caaaccagtc
    14641 gagcacgaag gcggagaacg cctgacgcga caataacggg tgcgggataa agcacccggt
    14701 cagcgcattg cgtttgaagt acagcgcgga ctggtgccat gacgcactac caaacgcgcg
    14761 agccagcccg taccagtcca ccggggtgtc gtaataacgg ccattgtcgg cgcaatacat
    14821 attatccagc aggtcatggc catccctgac cggatagggg ccgtcaaagg taaacgcgct
    14881 cagccccgga tcgcttttca gggccgcggc catatctggc tgactagcgg taaccacccg
    14941 gcgtgtgccg gttttatctt ttcttttcat cagaactcca tcgcaaagcc accaccgccc
    15001 tgctcctggc cgagtggttc attgatgacg gccagcatgg ttgcccaggc cagatcgcca
    15061 tgattagagc cgcgtgcgcg gtcggtgtcg taagtcatga tgccgcctgg cgtcttgaca
    15121 cgccgcacgg cgttgaacgc gttgatcagt gcctgctcgc tgcggtcgta ttcccagcga
    15181 ccagcacgaa tgacctgaag cattttcagc actagggcgc gtttggatga caccgacatc
    15241 aggaagcaca ccgccgccgg gaagaatttc ttaacaatct ggtagaccgc ttcaccgata
    15301 ccggtgccat cgatggcgat atgctgcacg ttgtatttga aggtcagtgc ctcgataacc
    15361 ttcgcctgct cttcgaactc caggccacgt atctgctggg tttcgatggt gcggaatttg
    15421 ccgcccgcca ccagtggcgg taccaccact gagatcgcgc cgctgtcgcc gttaccgcta
    15481 ctgccgttgg cgtcataacc aacccagacg ccgcgatcag ccatcgggcg tgacgcgaaa
    15541 ggtttccagt ccggccactc gtcgtaaccg tcggcaccgc agctaaataa caggttgagg
    15601 ttaaaggcgg actcaccatc acggacgaac tcgcagccgt acaggttgtt gtattcatcc
    15661 gggttgtttt cgtcgcggat ttcttccagg tcggtgtatt cccagccgtg atcgatgaca
    15721 tcctgtagcg tcacaatctg acgccaggtt ttatccgggc atagcaaacc gctattgagt
    15781 gctttccatg acacatcaaa cgcgaccttt tgcgccttac tgcgcttctc attccagcgt
    15841 gcgcctgtcc agaacgggta ggcttcatgg gtttcactcg atggggtgga aaagtaggtg
    15901 cgcgtcaacc ccttcagggt cgccatcgcc ccggccacct tgcgcaagtt ggcaaagtta
    15961 ctgacccaga aaaattcatc gaaatacagg ttgccggtgt aggactgcgc cgtcgcggca
    16021 gacgtcccca gaaaatgcag ctcagccccg ttgctcagga cgattttgtc gccgcctttt
    16081 agttcgacgt ccacctcttc cgccaccttc tggataaagc cccggaactg gtgtgcctga
    16141 cggcgcgagg cagaaagaaa aatctggtgg cgctgataag ggtaagccac gtcatcacgc
    16201 agcgcccgca ataacgcttc acgggcaaaa taccaggtgg caccaatctg gcgtgacttc
    16261 aggatcatgc gatttcggtg gtgacgttgc tcataccagc cgttttgatg ccaggccagt
    16321 gagtcgagaa tgttggttcg caacgcggaa atctgttcgt cagaaaagtg atttttcacc
    16381 ttgcgctggc ggggtttctt gccgcctgcg gcattgcccg gctggccgtc attcagcgtt
    16441 ttcaactgcc gggtcagcgc gtccatttcc ttcaggtcgc caccggtttt agtcggcttc
    16501 tgggccaact ggcacaaccg tgcatcgata gaatgcgtca cgcgctggat aggcggcgtc
    16561 tcgtcccatt cgtcgcgctt tttccaggca tacaccgtgt tttgattaat ccccatcagg
    16621 cgcgaaattt ccgctggcgg gtagccctgc cagtaaagct gttttgctcg ctgccgtaca
    16681 aatgcgtcct gaatcatgcg cggtttcccc ctttgccggg aagattaccc cgcgcgcgat
    16741 ccgcctttcg ctcactttcg gctctggccc tccgccgaca acaaaacagc gttgagacag
    16801 ggagttaggc tctgcaatca tgatgtcaca gataccacag gacaggacta caggcatgag
    16861 cggtacagct aaaccgaccc gcaaaaaatt ccgggttgcc gtctccggct ccaccgttga
    16921 cgggcgtgaa atcggacgcg accacctcta tgcaatggcg gaaagctaca acccgcaggt
    16981 atacggtgcc cgcgttaacg ttgagcatat tctttctccc tatccgggca gtgatttcag
    17041 tgcgatgggt gatgttattg cgctaagcgc ggaagacatc accgacggcc cgctaaaagg
    17101 ccgtgccgcg ttgtatgcgg aaatcgaacc caccgagcga atgaagcagc tcaccggcga
    17161 agggaagaag atttattcca gtatcgaaat cgacccgcag tttgccgcga ccggcaagcc
    17221 gtatctgcgc ggcctggcga tgacggatac cccggccagc ctgggcaccg atcgcctgaa
    17281 attcgccgca caacaacggg cacaggtgca ggcattcaac aatctgcccg gtgagccggt
    17341 catgttcacc gaagcgatgg aagcggagct ggtcgagctg tccgaacagc acagcgacga
    17401 ggggaagcaa tggttttccc gcgtgatggg gattatcggc aaaggccgta aatcggacag
    17461 tgagcagttt aaccagatgc gtgaggcggt ggaaaacgtt gcccagtccc atgctgacct
    17521 gctggacagt ttcaacacgt tgaaaaccca acaacagcag gacagccgaa ccattcagac
    17581 gctgaccagc gaactggccg cactcacgca aaagctggcg acgcaggata acagttacag
    17641 ccagcgccca gcagccagcg gcggcaacag cggcgcgcaa ctggctgact tttaagtacc
    17701 gttaagcgag acaagcgaac atggaaaaca cgacccgtaa cctttttgat cagtatattt
    17761 cacgtcaggc gcagcttaac ggggtgcagc cgaatgccgt ggcgatgacc ttcagcgtcg
    17821 aaccggccat ccagcagcgt atggagcagg ccgcacagga aagcgatgaa ttcctgaaac
    17881 agattaacgt gtttggcgtg aaggatcagg aaggtcagaa aatcctgatc ggtagcaaag
    17941 ggccgattgc cagcaccaac aacagcagcg acggcacgtc ccgccgcaat ccgactgaca
    18001 accattctaa agagcctaac gactatcatt gccgtaaggt gaattatgac tcggcagtca
    18061 gctacccgca gttggatgtc tgggcatcac agcctaactt tcaggcgctg atcagccagg
    18121 ccaatgcgcg gcaaatcggc cttgaccgca tcatgatcgg tttcaacggt accacctatg
    18181 ccgagaaatc caaccgtagc gccaatccgc tgttgcagga ttgcggtgtc ggctggctgc
    18241 aaaaaatccg caacgatgcg gggcaccgca ttatcaaaaa cgtcacgctg accgcccgcg
    18301 acgaagacaa caagattgtc accaaaggca cctacggcaa cctcgacacc gctgtgtttg
    18361 acgccaaaaa cagcctgctg gatccgtggc atcgcagggc accggatctg gtggtgatca
    18421 tggcgtccga cctgctgacg tccagcaact ttccgcgcct taatgcactg agccagagca
    18481 accccaatac cgagttgctg gccggtcagt tgattgtcag tcaggagcgt gtgggcggtc
    18541 tgccgacctt cctggcaccg tacttcccgt ccaacgcggt gctgatcacc tcgttcaaga
    18601 atctgtcggt gtactacctg ttgggggcgc tgcgccgcag catcgtggaa gaaccggagt
    18661 acaaccgggt cgccacctac cagtcgtcca acgatgattt tgtggtggag gactacggca
    18721 aggtcgccct gatcgacggg attcagtttg cgcaggcagc agtcgacggc cagtaacagc
    18781 caggcggggt aacaccccgc cccaaccgga gaacacacca tgctgacacc ggcacaacga
    18841 cattttcagc gggtcatggc cgagcgccgg ggccaggcgg acaccgaaac ggtggtgtca
    18901 cgcactgccc atgagcaaat ccttcaccgt ctgcgcctgc atcaggccac gctgaaacag
    18961 gtgcaatctg atgcgaccaa agcagagatg aaaaaagcca tgctgccgga atatgacggc
    19021 tggattgatg gcacgctgga aggcgacagc ggccgacagg atgaagtgat cgtcaccctg
    19081 atggtatggg cgattgactg ccaggatagc gcactgacac tgaggctggg gcgttacgtc
    19141 gttaagcatg gcctgtcttt gcctgccgac aagttccgcc gcgatgcggt aacggtactg
    19201 gctgaggaag tgagcaaccc ggtgttgacg ctggcaacca ccgatgcaga tgccgacctg
    19261 agcgggtata ccgccgtgct ggatgaagtg gccgcgattg tggatggcaa agacatgccg
    19321 gatgaagtgc gcgccaagtt gtgcaaagcc cgcgccttct cacgccgtgc ggcagtggat
    19381 gcacaaacca aagctgaggc actgacactg ttccgggaag cgatggcccg caatccgaac
    19441 gcgggagtga aacgggagat cgccaccctg acgcgggagc tgaaaaagct catgccgggc
    19501 agcagtaacg agccggaaga cggcccaccc ggcgacgatg aaacgaccac ggagacaccg
    19561 cctgcggctt cagccgacgc cacgcagcca gcggtaaaaa aagccgccgt gcgtaacacc
    19621 acggcgcgga aaaccacacg gccgacgggc aaaagtaaag ccgcccgtca gtctgccaaa
    19681 cgttaacgac ttcggccccg tccgacaggc ggcgcgccgg gtgatctgcc cgtatacggt
    19741 ctttttgccc ggtgcccacc gcctgacttt tgggagagtt gagcatgagc ctggtagctc
    19801 aaaaacgtgt cagcgacagc ggtgacgtac cggagattga cgacggcgcg gcggcagtca
    19861 gcaccggggc gttctggccg gtgatcgtcc tgcgtgatct gcgcctggcc gcccgcatca
    19921 ccggcggtat caccaccacc cgcctgatgc acgtcaccac ggaagcggtg gtgcatgtga
    19981 ctgaccagct ggcgagctgg cagcagacgc aacaggccac cggatatgcc gcactggcgg
    20041 acgttccggc cggacaggtc aacggcgaaa gtatcaaggt gtaccgcttc aggcgtgcgg
    20101 tttatgccat cgcccgtgcg ctgttgctgg agggataccg cgatgtggat accacggcca
    20161 aaggcgacaa ggcaacagac acctttgata accagcgtga cgatttatgg cgtgatgcgc
    20221 gctggagcat cgccgatata cgcggtgccc agcggctttt tgcggagttg tgctgatggt
    20281 ggtccgggcg cttcagggcg atacggtgga cttgctctgt tatcgccatt acggcacatc
    20341 cgccggtgtc accgagcagg tgatcgccgc caatccgggg ttaagccgcc agatgtttct
    20401 ggcagccggg caggctatca cgctgcctga tattccccgt cagacagaac aggaaacggt
    20461 gcagttatgg gattaaacga tcttcagcgc ctcaatgatg gggtgaccta tggcctgtcc
    20521 gtgatggtga ccggcatcgg ggtgatgacc gtcagtgaaa aagttgcgct ggcgggcctg
    20581 gttatcggtg ttgtcaccgc gtggcgtgcc tggttgttcc ggcgtcgtat cgagcgcgca
    20641 cagcgacgcc gcaatgaact gattgaacag attttacagc agtccgagcg ccgcacgctg
    20701 aatacatcgg aacgccgtgc ggtggctatt ttgcatcagg gtgacgttga cgatgaaaac
    20761 cgcgattaaa cgctgttcga ttgcgctgat tgtggcgctc ggcgtcacgc tgtcccccgg
    20821 caccctgcgc acgtcgccgg aagcacagca gaaaacggcc agttgggaag actgccgggc
    20881 gtcgtcgtat tactgccccg ccggtgtgct gacggtgggc attggttcta ccggtaacgt
    20941 gcaaaaccgg gcgtacagca atgacgagat cgcccgccgc tgggtcaacg atatgcagcg
    21001 agcagagaac tgcgtcaacg gtaattttaa tggtgctgcc atgccgcaat cggcgttcga
    21061 agccatgacc gacacggcgt ttaacctcgg ttgcagtggc ctgatgtggt ttaccaaccg
    21121 gcagggcagc aagcagcgta ccaccatctg gaaacatgcg caggcgcacg aatggcctgc
    21181 aatgtgtgag cggctgaccg attttgtcaa cagcggcggc cagcgctcca ccgggctggt
    21241 caatcgtcgc agcgacttta aagcctggtg cctgcgtgat ctggcgggtg tgccatgaag
    21301 ctgaccgcca cccttgccgt gctgctggtg ctggccgtca gtggtgtgct ctggcaaacc
    21361 taccaacgcg gcattgaccg ggcacatacc gaggcactga ccgacagcgc tcaacaacag
    21421 cgcgagctgt taaccgaatt tcgggcactg gccgacgatg ccagaaacgt gctggcacag
    21481 gtgcgcgagc gtgagcaaca acgttatgcc gaaggggaag aacgccgtga aaagatgcgt
    21541 gaggggatgc agcccgatac gtgcgctaac actgtggtgc ctgttgctgt cagcgacagc
    21601 ctgcaaaaac gcgccgccgt ccagcgtgca gatactgcac gacccggtac cgcccagcct
    21661 gacggcaccc acaccgacgc ccgtactgaa aacaccggtg acctggggcg cggtcgcgct
    21721 ttggagtgat cagctgttgg atgcgctgga cacctgcaat gcagacaagg ccgccatcaa
    21781 cgatttatac ctgcgtcgtc ttcagcgcct gaaggacgcc gccgccacac cataggggaa
    21841 tgctcatgct gaaaaccgat tcgctgcgtg atgcgctgac ggcatccaat acctggtgcc
    21901 gggccaaccc ggaagccttc acggtatttg tggaagaagg cggtattgaa accaccgggg
    21961 aaacgccgtc gtttctgtac cgctactcgc tggtgctgtt tgtgatgaac ttcaccggtg
    22021 atatcgacga tttcacctta ccgttaatgg cctggctgtg gcagaaccag cccgacctgt
    22081 tgctgaaccc gcaaaagaac cgcgaggtga aattcaccac gcttatcaac aacgacgaca
    22141 gcgccgatat tctgtttgaa atcccggtgc gcgagcgggt taaggtcacg cgggacgata
    22201 acggcatcct gcgtgccgaa cacctgcctg agcctcgtcc gcgcctcacc ggcggggtat
    22261 gggatgcggt gcttgacgat gccaccgggg agacagcgac atgacggata aactgtttca
    22321 cgcactggat caggtgtttg atgacatcct ttccggcctg tcacccgccg ggcggctgaa
    22381 aacagcccgt caggtcgggc aggcactacg ccgcagtcag cagcagcgca tcagggcgca
    22441 gaggaacccg gacggctcgg cctatgcgac ccgccgccgc aaggtgttgc gctcgcagca
    22501 gggaatgatt tttgtctggg aaggtcaggt gcgccacctg aaaaactggc acggtggccg
    22561 gggaaaacac ggccgcacga tcaccggctt tgatgaagac cgcaacgcca tccgcacgtt
    22621 ttaccgcagt gatattgagc gttatatcga gatcaacacg caggcagtgc gccgcacgac
    22681 cagcaagaca accccgatgt ttcagcgcct gcgcggttat cgttttctca aaatgcaggc
    22741 cgataccgaa ggggccagcg tcggctttga tggtatcgcc gcccgtatcg ctcgcgtgca
    22801 tcagtatggc gagcgtgaca aggtcgggcc gggtgccttt gcccgctacc cggtgcgcga
    22861 actgctgggg atctccccgg ctgatgagcg actgatccat gaaacggtga tcaacagtct
    22921 ggggagtgcc gccacatgag tgctgaactg atgcgattac tggaaaacct gttgcgtgtc
    22981 ggcgttgtca cggcggttga cccggaaagc tggcgagtgc gcgttaagag cggtgaattg
    23041 ctcaccgact ggctacgctg gaacaccaca cgcgccgggg cgtttaacgt ctggttcccg
    23101 cctgctgtcg gggaacaggt gttgctgggg tgccttggcg gtaacccgga aaccgccgtg
    23161 attctcggta gccttttcag cgaggcccac ccggcaccgg gcagcagcct gaaggaaatt
    23221 gtgatcaccg cgccggacgg tgcccggttt cggtatgacg ccgtggccgg tgcgctggaa
    23281 gccaccggca tgaaaaccgt caacgtggtg gcctcggtca gcgtcacact gagcacgccg
    23341 gtggtggaat gcactcagca cctgaaggcc cgcaccgtcg agatcaccca cggcggcacc
    23401 ctggccggta acgtggcgca ttctggcggc gcgatgacct ctaacggcgt tcaggtggat
    23461 agccatcgcc acggtggcat tcagcccggc ggtagctgga cgagtggcac acaatgaccg
    23521 cgacctatac cggcatgaat ccgcatggta ccggcaccct gaccgatgca gatcagctct
    23581 ggcagtcagt gcgcgacatt ctgactacgc cgctggcatc cagggtgatg cgccgggatt
    23641 acggcagcct gatccctgac ctgttggatg cgccgcagaa cgctgtgacg cggcttcagt
    23701 tgatgagtgc tgccgttatc gccctgacgc gctgggagcc gcgtatctcg ctgaatgccg
    23761 tcgatattcg ttattcagca tcgggaacgg tggaagcgga gttatcaggg ttgattaccg
    23821 aaacgatgca ggcggccagc tctaccctta cgctcaggag tcacggtgat ggcgacggtt
    23881 gatttatcgc agttacccca gccgcagatc attgaagtgc tggacttcga agtcatcctt
    23941 caggacgtga aagcggtgat gattaccgcc tttccggccg ctcagcaggc gtctgtgacc
    24001 gctgcgctgt cgctggagtc cgagccgtta accgtgatag cgcaggtgat cgcctaccgg
    24061 gaaatgatgc tacgccagcg gattaacgaa ggcgcggaag cctgcctgct tagtcatgcc
    24121 gtgtcatccg atttggataa tctggcggcc aacctgaaca cccagcgact aaccattacc
    24181 gaagcgactg acaccgccga tgccgtgatg gaaggtgaca gcgcgctacg tttacgggcg
    24241 caggcagctt ttgacgggct gagcgtggcg gggccaaccg gtgcgtatga gtatttcgcc
    24301 aaaagtgcca gcggcaaggt agcggatgcc aaggcgatca gcccgtcccc ggcggtagtg
    24361 gtggtgtcgg tgttatccac cgagggtgat ggcagcgctt cggctgactt gctggcggct
    24421 gtcgatgccg cgctgtccac cgatgataaa cgcccggttg gtgaccgcct gacggtgcaa
    24481 agcgccggga ttgtgcgcta tgccattacg gcggtgttgt accgctatcc ggggccggaa
    24541 tcggagccga tccagcaggc cgcacagcag gcgttaacgt catggctcgg tacgcagggg
    24601 cgcatcgggc gcgatgtggc tcgctcggcc atcatggcgg cgctgcatgt gcaaggggtg
    24661 caacgcgttg aactgctgga accggcgcag gacatcgtga tcagcgacac gcaggcggcg
    24721 tactgcaccg ggttcacggt caccgagggc ggcagcgatg agtaacagtc tgctaccccc
    24781 atcagccagc gactttatgc gcaacgtcgc taactccacc ctgcgcctga gtgagatagc
    24841 ggtctgtctg gatacgttat gggacgctga gcgctgcccg gcacaattac tgccgtacct
    24901 cgcctgggcg ctgtcggttg atcgctggga taaacgctgg tcagaacaga ccaagcgcca
    24961 ggtgatcaag gcggcctggc tggtacaccg ccagaagggc accctcgcgg cattgcgccg
    25021 ggtagtggag ccgttcggct atctgattcg gatcacggag tggtggcaga ccggcggcca
    25081 gccgggcacc ttccggctgg atatcggcgt gcaggatgct ggcatcactg aggaaaccta
    25141 tctggagctg gagcgcctga ttgccgacgc caaaccggta agtcgccact tgctggggct
    25201 aaatatcgtt atggactgcg cgggtgatat cccgctggct gctggtcagt acagtggcga
    25261 tgcacttacc gtttacccct actttcccga aaccattacg atcagcggcg ctgacaagtg
    25321 cggcggtgcg atacatcttt ctgataacgt gagcgtgaat gcatgacgac aaaatatttt
    25381 gccttgctga caaacaccgg cgcggcactg ctggcgaacg ccaccgcgct gggacggcaa
    25441 ctatcgatta cacaaatggc gcttggcgat ggcagcggca cgttgccaac tcccgacccg
    25501 gcgcaaacaa aactggtgaa tgagcgccgc cgggcaccac ttaattcgct gaatgttgac
    25561 ccggcaaacc ccggtcagat catcgctgag caggtgatcc cagaagatga aggcggctgg
    25621 tggatacgtg agatcggcct gtacgacgcc aatggcaatc tgattgccgt cgccaactgc
    25681 ccggaaacct acaagccgaa attacaggaa ggctctggcc gggtgcagac ggtgcgcatg
    25741 attttgattg tcagcagcac tgacgcggta acgctgaaaa tcgacccgtc ggtggtgctg
    25801 gcaacgcgta agtcggttga tgacaaggcg gttgaggcga aagcccatgc cgatgggacg
    25861 atggccagcc atgtgaatga cgcgaatccg cataagcagt atgcgtgact gggagcagat
    25921 ttacaccacc ggattcaggc catcacctgc ggatattggg gcgctctctg ttgccgagtt
    25981 taatcagtca attaaatcgt atgcgccgat tgcaagcccg gcgctgacgg gagtgcctac
    26041 cgcgccaaca gtaaattccg ggaataactc atcccagtta gcgacaactg catttgtgca
    26101 taacgcgctc actgataacg cctttgtact ggattttacg ggtacagtgc agaatttcga
    26161 tgtgccgtgg gatgccaaaa gcgggtttta taaggcagat gtcgggtcac atacagatgc
    26221 tgttttgcat tttcacggac cagatgcgag ttgtagtgcc cttcagtttg ctgcgcatta
    26281 cggtaacggt gggttgagtt atcggacgtc ccgcgatagc aggggctttg agcatgactg
    26341 ggagcagatt tacaccaccg gattcaggcc atcgcctgcg gatattgggg ctatttctgt
    26401 atctgagcta accggcatcc cactgccgtg gccgcaagtg accgccccgt cgggctggct
    26461 gaaatgtaac ggccaagcgt ttgataaaaa ccgctatcca cggctggcgc aggtctaccc
    26521 atcgggtgtg ctgccggatc tgcgcggcga atttattcgc ggctgggatg atgggcgtgg
    26581 ggtggatgcg ggtcgagcga tactgagcgc acagactcaa tcgatacagt tgcatacgca
    26641 tgatggtgga ataactggac cagcaaccgg ggtaatcgaa gggtacggag acggctctag
    26701 cggcggtgct cccggcgttg acaactacaa tcctgcggca actggcgccg cgggaggcgc
    26761 agaaacccga cccagaaata tcgcattcaa ctacatcgtg agagctgcat aatgagtgag
    26821 aaatattctg ttgctgtaca gagtgcccgc atgggaaaaa gtgggttggc agaatgcgca
    26881 ggatggctga ctgtttatca cgttgatcag cagacgcgtg aatatactgg cgcgagttat
    26941 gaatacatga tggtcggcac ggggttacca gccgatagtt atgctgacac gcctgatctg
    27001 ccagctgcgg ggcaagcttt acggcgtagc gctgatggtg cgggatggga gcatgtaccg
    27061 gacctgcgcg gcaaaacggc gtaccgcacg gcggatggtc aaccgcagac agtgacagct
    27121 ctcggtgaat tgcctgacgg gttgacgctg ttttccccct cgactgcatt cgataaatgg
    27181 aatggcgaaa tctgggtaac tgatgttgca gcccaacacg ccgcagccgt ggccgcagcg
    27241 cagcaggaac aggcggcacg aaaagcaaca gcaacggcgc ggatcactga actgagttac
    27301 gccgtggaac tggggatagc aactgacgta gagcaagcgg cgctgaagac gtggaaaacc
    27361 tatctggtgc aattaagccg cattgataca tccgccgcca cagatatcga ctggccggaa
    27421 atcccttcta cctgatctgc ccggccctgc ttcgacaggg ccgttaaacc agccctttca
    27481 acgtgttgac ggtgtccgtc atggctgtgc tgacggtgtt catcgctttg gttgcactgc
    27541 tgcgcgcgtt gtccatcatg tcgctaaagg atgaagattg cagcttttcc cgcaggtctt
    27601 catcacagcg ctgaaagctc agcgaaaact caatcttctt tgcctttccg tagcgattca
    27661 gctctgtgcg cgtggtctgc ataccagtca gcacgtacat accgtaaatc tgcccggtac
    27721 cgtcaatcaa cggccagggg cggccactgt aggcttgcgt agtcagcgcg gttaacgaca
    27781 cctcgccgcc ggtaatttcc gggtacagca caccgctcag tgtaatctga tcttcaccgg
    27841 caccgatgta ttgccatttc gcagagcggt taatccgctc attcttcaca tgccgccagg
    27901 cacgcgactg ctgaagctgc tggtaaggca gcgtttgcag ctcaaacaca aacaacccgt
    27961 ataccatcat catcggtttt tctccttact ctctgtctct gaaactgcca cgctgaagcc
    28021 tgtcgcggcg ggccagttcg gcactgactg catcggccac aatacggccc agctcgcggg
    28081 cgtcctgccg ttcaacgccg tgcaggtgta tatgaatttc cccattgaaa ccgcccgccg
    28141 ccggtgttct ggccgccgga cgactgaccg gggacgcgtc ggcttgtttg acgggctgtg
    28201 tcgccgcaac cacggcgggg cggtcgctga gcgcctgcat ggtctgcgca ggctgtgagg
    28261 gggcagaagg tgtgccgcca gtaagccggg attcctgcca ttcgccacgc acagccagcg
    28321 ctttcggcag gtttttgaaa acgatatcgc cggggccgat gcgctttttg gtttcttcca
    28381 gcacgccgcc ggtgttgtca gcaatcttct gcaaacggcg ctgggtaccg ctgtccccgg
    28441 tcaggggtgg cttaggcgcg ggtggtggtg cggtggtggc ctctttcagg tcgccggtca
    28501 ggttggcgac cagaccttgc agtcggtctt tcccttccgg cgtcagctct ttcaactgat
    28561 cggctttttt ctgcgccgca tccagtccgg acgggattaa accgagcttt tccagaatcc
    28621 agccgatccc ctccatcagc ttttgcagcg gcaataacag catgtccagt gccgacccca
    28681 gcaccttgcc gaaaccgtag cccgcaactg cgcagtcatc cagcgtcttc tttgtggtct
    28741 ggataggctg aaaaagctgc gtaaatcgat cccacaggcg cgacacggcc gacacaatca
    28801 catcaaagac gggagccagg cccgtaaatg cctgccgaat ggggccaagg ctgataacaa
    28861 tgccggtaaa catcccgctg aaaaacgttc tgacaggctc ccagaatcgc cagataagca
    28921 gcccggccgc cacaaacgcc gcgccaatca atccgatcgg gcttaacagc agcgacagca
    28981 cgccgcctaa caccgagaca gcgccggtga tcaggctcca tagcgcaggc aggccgctca
    29041 gccgcaacaa cagcccgcct acgcccctga ccagtgaacc caatgccgac accggcgagg
    29101 taaacacggc cagtaacatg ccacgcagcg gggtcagtgt cgcggtcagt cggcctgtgc
    29161 tgccagagaa aagctgtagc cagccaccta tgcgtgccat cggcccgccg agcaggctgc
    29221 ttaacccgga aaacatcgac accgcaccac cgacgccccg tgcgcccagc agcagcgaaa
    29281 agccgagctg gagcttagcc agcggaccca tcagcagacc gattgccagt gaggtgccac
    29341 cgatcgccac cgcgaatgcc gccgcaccgc cgacagccag taacagcgtt tgcgtcagcc
    29401 tgggattctc tttcacccag ccgctcacgt tggtaatcac atcgcttagc ccctgcgtca
    29461 ggttgcgcag tggccggtct gccgtttctt caacctgaat acgaaaccct tcccaggcac
    29521 tgtcgaggtt tttcaggtca ccacccaggt tatccgccat ctttttacca acggtcgccg
    29581 attcaccttt agcttttagc aactcctgga ataacttatc cagcttgcca ctgcctgccg
    29641 actgaaccag cgtttgcaga ccgacaaagg cctcttcccc ggcaatatct ttgaagaagg
    29701 acacctgatc gacctggccg tattttttgg tagctttgta gagatcacgt aatacgtcct
    29761 gcattggccg catcttgcct ttggcatcgg ctaccgacac gcccagctct ttcaatgctt
    29821 ccgctgcggc tttcggcggt gaagccagac gggccaggct ggcacgcatg gcggtaccgg
    29881 catcactgcc gcgaataccg ttattcgcca gcataccggc catcgccgcc gcatattcaa
    29941 ggctaatccc cagcttggcc gccaccgggc cggtgtattt catggtttcg ccgaggctga
    30001 acaggtcggt gttggtacgg gtaaaggtgc cggtcagtac gtcacccacg cgatccatct
    30061 ggctggcatc cagattgaac tgtgaaagaa tgtttgaccc gatatcagcg gtttcgccca
    30121 gctccatgcc accggccagc gccatattca gcacacctgg caatgccgct tgtatggcct
    30181 gcggcgtaaa cccggccatt gccagaaacg cctgaccgct ggctgcgtcg cgggtggtga
    30241 atgcggtttc cgcgccgagc tttttggcct gcgcccgcag ggccgccagt tgctgatcgc
    30301 ctttatccag ccgggtcagc gcctgaacgc gtgacatctc ttcatcaaac ccaaccgccg
    30361 gggccagaaa ctgcccgcct gcgtatccgg ctgccgcccc gcctgctacc gccatcgtgc
    30421 cgctaccacg tagtttgccc gcggtctgct gcattcgctc ataacgggcg cgtgcctgcg
    30481 taacggcagc cagttgccgc cgctctcgct ccagggtctg gttatattgt tcggtacgcc
    30541 ggatggcgct ctggatagtg gcattactgc caaccagtga cacaccgtga ccgcgcaacg
    30601 cttgtgaggc agcgcgcagc ttgaccattt cctgatcgcg ggtgatgttc agccgctcta
    30661 gtttgacggc cagtgcggcc atgtgttccc gttgcttatc ggtcagcaca gtgttgtttt
    30721 gctgggcctt tttcagcccg tccaggctgc ggctggcttc atcaatcttg cgtgaggtct
    30781 tttgtacgct gtcgcgcagg cggttgaagg tcctggactg agtgtccaga tccttaatag
    30841 cggcctgggt gcgtttgagg gattcagaca aaccgcccgc actctggcgg gcggcgttga
    30901 ccgggcgggt cagccggtcg atagcgctga aggctacgcg gatatcaagg cttttcatcg
    30961 gcttcactgg ctccacttcg gatagccgcc cgcgtacgcc aggctatcac ctcgcccaga
    31021 tccatgctga acagttcaga gggcggccag ttaaaaacaa cggcgatatc agcgaccaga
    31081 tcgtctatct gatcgaactg caagacggtt acgcttcctc cgtcacctcc gcgttcggct
    31141 cgccaggctc cacatgcact aaaaaaggcg tgattgcctc cgccagtcgc atgaaatcgc
    31201 gggtatccat cgcgttgatc tcggccagtt tcagttttgg cgaggtaacg cgtgttaaca
    31261 gggtggtgat ggaatccaca tccatattca agacgttgac cagccgcagg ccacgcaatg
    31321 agccagcctg tttgatatcg tcggtaatgg tcacctggct gatagtgctg tcgccccgca
    31381 taataggcgt cgccagggtt acggtgttgt tgttcggtgt gttcatggtg acaggctccg
    31441 ggcggctaat gtggccgcca tgattcaggt tgttcagtta cccagcccca gcgcagacgt
    31501 gatgcgatcc gggtagatgt ttttgccgtt tttcttgtag atgaaattca gcaggtcaat
    31561 ttccagcacc gattgatcgt caatcgacag cttgtaatag gtgtttttca gcgcataggt
    31621 gacagatgtg tcttcgccct gcttggactc gccgccgtca atctcggtaa tacgcccgcg
    31681 catctctact tcgaccagct ggctatcgcc gtcggtgtag tattcccccg cgaagcgcag
    31741 gcgaacgtca tcgatatcgc cgccgtattc cagcagcaac tttttctcca tgccgccgac
    31801 aaccatctgc gcttccagcg cgccggaatc cataccgaga tcgaccgcta ccgagccaat
    31861 catgcccgcg ccctgaaagt cttcagtctt gcgggtcagc tttggcagcg tgacggatgt
    31921 gaccttgccg atctggttgt tgccgttcac aaaacaggtg aacaggcgca atttatgcgg
    31981 tacggccatt tacacacctc ccagtgacga gaacgcggaa tcaaaatagt catcggtgaa
    32041 ggtctggtat aacgtcaggt cttccagcgg cggcaccggc gtgtacttgt aacgcacgcg
    32101 cacctgtccc tgccgcaggc cggttgtggg gttgtcctga atatcgaacc agcattcccc
    32161 gccgatcagc ctgcccgccg tgaccagcgc gctcagcttg ccgttgatgc cgttcaccac
    32221 gtctttcacg ttggccggag tcagtggctc gtcaacggct tcaaactgcg cttccgcgat
    32281 actgtcagcg aggatttgcg cggtgcgggt gtacacctca aacaggtaat catggatatc
    32341 ggtggtgcgg ttgccccaga agcggaatcc gttgcgctta atcagcgtgg tgatctcctg
    32401 gttgttaagt tcattggcgt cgctgtcttc ggcctgaagc gaccagaaca catcccgcga
    32461 gatacccagc acgttattca ctgccacgtt cgacagcgac ttatgccagc cctgatcgtt
    32521 atcaatcgct gcgcgcaggc cgcaggcata ggccgacgcc ggaaaggttt cattgctgcc
    32581 gctaagcggg ttataagcga taaaatccgg ccagatcagc atcagctcac ggtaggcaaa
    32641 ctgcgcacgg taggtgatgg cctccgccat cgtggtgcag ccgtgacaac cggcatagac
    32701 aaacgcccgc agattctgcg caatcacaca cagcgctgac gtcacttcgg cggtgtcata
    32761 gtccggtacc gccagaatcc ggggccggta attaactttt gcttctgccg tcagcaaggc
    32821 atacatgccg gtataactgc cgtctgccgc tgtcccgccg ataatcagtt gggactgggt
    32881 tttgtcgccg ccttcggttg ctgctgccac ccgcaccacg atcactttcg ggctggtctg
    32941 gtcagaaatg gctttcagcg tcttgtagag tgagccggtt ttacccgcct tgcccagcac
    33001 gctattcacc cgtgtgatga gcaccggcgt attcagggga aaggtgtctg cgtccgcatc
    33061 ctccgccacg gccaccacgc caatcacact ggaatcaatg tcattgattg cggttaccag
    33121 gtcggtattt tcacgaacgc gcacaccgtg gaaacgtgtc tcggacatgt tcgccaccat
    33181 tacgttattg agttcatggc gataatcccc gatatccgcc gcacactcac gcgttgccgg
    33241 gtctggccgt ccggcgacaa caaaaagcca tttttcccca cgcgtgcgcg tgaaatcatg
    33301 cgcgaaaaca agggggaaac gatggctatc accgatctgg ctgactcact tatcactacg
    33361 gcgaaacgct acgatgatgc gctaaccgag gcggtaaaaa gcccggcctt cagcattacg
    33421 ctgggtggga aatcgctgaa ggaactgagc gaccggctaa tctcgctgtc actgaccgac
    33481 aaccggggct ttgaagccga ccagctcacg ctgtcgatag acgacagtga cggacgcgtg
    33541 gaactaccgc cgcgtggcgc tcagattgca ctgtccatcg gctggcaggg tgaagcgctg
    33601 acttacaaag ggctgtatac cgtggatgag atttcccacg aaggcccacc cgatgtgctg
    33661 ggtgttacgg ccagaagtgc ggatttccgc gaagaattca acgtgaaacg tgaggtttcc
    33721 tggcatgacg tgacggtaga gcgtgttgtg tcggcgattg cgcaccgcta cggcatgaag
    33781 gcgcaaatca gcaacatact gatgaatatc gaaatcgacc acgcagacca gacggaagag
    33841 agtgatatgt cattcctgac ccggatggcc gagcaactgg gggcgattgc caccatcaaa
    33901 aacggcacct tgctgtttat tctgcccggt ggtggtgtaa cggcatccgg caaggcgctg
    33961 ccgtcggcca gtatcacccg cagtagtggt gatggtcacc gttttcgcat tgcggatcgg
    34021 gatgcctaca ccggtgtgcg cgcctactgg ctggatctga aattcggtaa aaagaagaag
    34081 gtcagcgtaa agcgccgccg gacaaagccc aaaccgaaaa aagagaaaag cagcagtcgt
    34141 gaaggcgatt acatcaccgg cgcagaaggc aacgtgttcg tactgcggaa aacctatcag
    34201 aatgaagaaa ccgcaaaacg tgccgcggcg gctaaatggc gacagttgca acgcggggcc
    34261 gctgaatttt cgattaccct ggcgcgtggc cgtgctgagc tgtatcccga aatgcacctg
    34321 acagtaagcg gctttaaacc ggatatcgac aatcaggact ggattatcgc ccgcgcggaa
    34381 cacgttattg atggcaacgg ctttaccacc cgtctggaac tggaagcaaa aatccctgac
    34441 tggatagcag aaagtgaata aaatggcggc gagttcaact cccacagggg agccattatg
    34501 ttcagatgtc ctttttgcgg ggcaatggcc cgcacccgta ccagtcgccg cctgagcgat
    34561 atcaccatcc ggcagtacca ccagtgccaa aatctggaat gtagtgagac atttaccacc
    34621 ctcaacacga tagaacggcg cgtatcaaag cgtacacggg aagacccact accgcctgac
    34681 tttatcccac aggacgcctt tccggcttcg cattacggac gggatcaatt gaatctggcg
    34741 ttgtaaaaca aaagccccgc aggatgattg cggggctttt caaagttatt ttaattgctg
    34801 tgtgtatggg cagcgataac gcttcacctc tgtcaccttt tgctttgcca acttcctcac
    34861 aagaagattt cgggatttca aaaacaaacc cagaatagtt atttcggttt aatacctgta
    34921 tctcttttat gttgcttata tatgcagttt tctttgcctc aaaccagagc gaagtacaat
    34981 cctcattgat ataactgctt catagatttc attgctcaca cggtcttcat tcattgttag
    35041 ccgaataacc ccgcaatttt ccgaaaaggt tattgggtgc catggtttga gtgatttttg
    35101 caagatcgag tgattgattg aatgggcaga agtgcagaat gaagccaata acaacagtgc
    35161 gcatgtgtat tttttaatga gatatatcct gatttattaa ttcttttatt ttttgctttg
    35221 tatgtataac agagagatta acaataggag agaatgattg tggtgacaat ccaggttttt
    35281 caaggtaatg ccgatttacg gagggtgaaa taaagggggc attgacatat tgctcaccct
    35341 ctttttccac atcttttaag cgctaattat tcaattaaag ttaacaataa cagctgattg
    35401 aagactgcct tttttgtacc cgaaaaacgg gtgctgccac tctgctgcca ttttgctgcc
    35461 acttgccaaa tgacagacac aaaaaaaccg cctcgtggcg gtcatgttat tttaattatt
    35521 tccttatatc acaagcactt atcgcatggt gcccagagcg ggacttgaac ccgcacagcg
    35581 cgaacgccga gggattttaa atcccttgtg tctaccgatt tcaccatctg ggctcagata
    35641 ttggaggcgc gtcccggagt cgaaccgagg tggacggatt tgcaatccgc tgcatggcca
    35701 ctctgccaac gcgccctata ttggggctac taaatcgatt tggagcggga aacgagactc
    35761 gaactcgcga ccccgacctt ggcaaggtcg tgctctacca actgagctat tcccgcattt
    35821 tacagaacag gttgtttatt aagtattttc aataaactat gttcctgtcg atgcggtgca
    35881 ttctacttac ctgacgcggt gagtcaataa aattatcacc ccgcttggat cgtttgctgt
    35941 tttttaaggc gagacgatca atgttcaagc aaatcacgcc aggctgcgct cagatattga
    36001 aacatcgacc agaacgtcaa tacagcggcc acatacaaag cagccacgcc agcagcctcc
    36061 accatgcgct ccggtcgcca caacaaaccg accagcgcaa ccatctgcgc agtagttttg
    36121 aatcttacca atccaggaaa ccgccacgct gctgcgctta cccagctccg ccatccattc
    36181 gcgcaaggca gaaataatga tctcacgcgc aatcatcgta gcggcgggca aggtaatcca
    36241 ccatgaatga taatgctcag ataccagcac caaagcaacc gcgaccatga ctttgtcagc
    36301 aacaggatcc aaaaaagcac caaaccgggt agtttgtctc cataagcggg caagaaaacc
    36361 atcaaaccag tctgtcacgg ctgcaaaaac aaaaatgcta gcacagacca tcggtgccca
    36421 actgaatggc agataaaacg ccagcacaaa gaatgggatg agaacaacac gaaacagggt
    36481 aagccacgtt ggtatattaa atcgcatagc gtctgggtaa ctgtctggcc cgaaagataa
    36541 tagggctatg ttgctacatt gcctctagtg tttcaatgca tgaaagattt tttctgccag
    36601 cgcatgtgaa attcccggta cgttggcaat gtcctccaca cttgcattca tcagcggctg
    36661 taaccccccc atgtacttca gcaaaatctg acgtcgctta ggccctactc cttcgatagt
    36721 ctccagagaa ctggtgcttt tgaccttggc gcgctgttta cggtgaccac tgatagcatg
    36781 attatgtgaa tcgtcgcgaa tatgctgaat cacatgtaat gctggtgaat cagcgggcaa
    36841 ggccacaccc tcgcctgtcg cttcaaaaaa tagcgtctca agcccagcct tacgatcact
    36901 acctttcgca acacccaaca gtaaaggtcg ggatgtatcc cacggtacct gcaatgatgc
    36961 aaaaacaccc ttggcctgcg ccagttgccc ttttccgcca tcgattacaa ttacatcagg
    37021 aatcttatct tcgtcaattg acttaccata gcgacgtctc agcacttgat tcattgctgc
    37081 atagtcgtcc cctggtgtga taccggtaat gttgtagcga cgatattccg agcgtactgg
    37141 cccatctgca ttgaacacaa cacaggaggc caccgtctgc tctcccatag tatggctaat
    37201 atcaaaacac tccatacgct tgattttttc aatgccaagc accgatgcta acgccgtcag
    37261 acgttgctgg atagtcgact gttgtgacaa cttcgtcgtt agtgctgtat gggcgttggt
    37321 acgcgccagt ttaaggtagc gtgcgcggtc accccgagga cgggtttgaa tctgaatttt
    37381 acggcccgcc tgatcggtta gcgactcagc cagcaactga tgctcaggca aagaaaaatc
    37441 cagcaagatt tcagacggta gggtacgaaa aacactgcct tgcaaataga actgccccac
    37501 aaatgtctgc accacttccg ccagctcagt cccaccagga actttgggaa aatagctgcg
    37561 actgcccaga acctttccct gacgaataaa gagcacatgc acacatgcca tgccagcatc
    37621 gaaggccacg ccgattacgt caagatcatc accatcgcca gagacaaatt gtttttcagt
    37681 gacacggcgt acagcctgaa tttgatcacg gatacgtgcg gcctcttcaa accttaattt
    37741 actgctcgct gtttccatac ggtcaatcaa tcgggttagc acctgctgat ctttgcctga
    37801 cagaaaaaga cgcacatatt caacctgttg ttggtactct tcatcactaa caaggccact
    37861 gacgcaaggt ccaaggcagc gaccaatctg atattgcagg caagggcgag aacggttgcg
    37921 gtatacgcta ttttcacact gacggatagg gaatagtttt tgtaataaca tcagcgtttc
    37981 acgaacagca ttgccattag gaaacggacc aaaatattcg cctttggcgt gtttggcacc
    38041 acggtgaaca gacaaccggg gatgctcatc cccactgagg aaaatcatcg ggtatgactt
    38101 atcatcacgt aacaacacgt tgtaacgtgg ctgatagcgt ttgatatagt tgtgctcaag
    38161 taatagagcc tcggtttcag tatgcgtgat cgtcacatcg atctgccgga tacttttcac
    38221 caaagcctct gttttacggc tagcaacatg agcacgaaaa taacttgaaa ggcgtttctt
    38281 cagatctttg gctttaccga cgtagataac cgtgtcgcta gcatcataca tacgataaac
    38341 cccaggctga ctggttacag tcttcagaaa agcctgggca tcaaaacgtt cagtcac
//

YKUnique 6+ CuttersHO��E����Y�?
