# Supplementary material for: May the Phage be With You? Prophage-Like Elements in the Genomes of Soft Rot Pectobacteriaceae: Pectobacterium spp. and Dickeya spp
Source: Front Microbiol. 2019 Feb 14;10:138. doi: 10.3389/fmicb.2019.00138 (PMC6385640; doi:10.3389/fmicb.2019.00138)
Supplement: Supplementary file 2 [file Data_Sheet_2.ZIP › Supplementary_prophagesGENBANK_files/Genbank FILES _SRP_prophages/phiD6.gb]

LOCUS       Exported               63832 bp ds-DNA     linear   UNK 02-AUG-2018
DEFINITION  phiD6.
ACCESSION   .
VERSION     .
KEYWORDS    .
SOURCE      phiD6
  ORGANISM  phiD6
REFERENCE   1  (bases 1 to 63832)
  AUTHORS   .
  TITLE     Direct Submission
  JOURNAL   Exported Aug 2, 2018 from SnapGene Viewer 4.2.3
            http://www.snapgene.com
FEATURES             Location/Qualifiers
     source          1..63832
                     /organism="prophage phiD6"
                     /mol_type="genomic DNA"
                     /note="/genome_id=6666666.356832"
                     /note="/genome_md5="
                     /note="/project=robertczajkowski_6666666"
                     /db_xref="taxon:6666666"
     CDS             complement(272..433)
                     /codon_start=1
                     /product="hypothetical protein"
                     /label=hypothetical protein
                     /db_xref="SEED:fig|6666666.356832.peg.1"
                     /translation="MADNKKTEATETKLARDDNYKFCPICGSEMRQIVEYNRQWWYCDE
                     CGYQEPVD"
     CDS             complement(446..1036)
                     /codon_start=1
                     /product="Tail fiber assembly protein"
                     /label=Tail fiber assembly protein
                     /db_xref="SEED:fig|6666666.356832.peg.2"
                     /translation="MTDKQYTTLDEHGFAVSDGWIVIYHANSVTGEYVGSGEEFLMTGT
                     GIPANSYTDAPPISQSGTAIVRSLDHLTWEIVTDYRGQTAYDTQTRQPQVVSTLGELPS
                     NLTLLIPETQYDEWDGNAWVTNTAAQRADAVSATLAVLATEYKNDMNDLNQAYLAAIVA
                     DGPQEATKQTIVRNRIADRKNKYVSDVAAAKQQ"
     CDS             complement(1033..2421)
                     /codon_start=1
                     /product="alternative bacteriophage tail fiber C-terminus"
                     /label=alternative bacteriophage tail fiber C-terminus
                     /db_xref="SEED:fig|6666666.356832.peg.3"
                     /translation="MNRSDAPKKQPVPFGVNGQRENILSTTPAGDNTASYDAGFPPVTM
                     ILKAAGGLPPKGQDMNQILYELSNLSRWFSAGALNSYDATFSAAIAGYPKGAVILGDDG
                     TSIYVSTTDANTNNPNSVSTGWFNLTAAYQPRDSTLTAFAGLSGGANKLPYFTGVDVLA
                     QADITSVGRDIIGQASIANVLSYLSAAPLASPALTGTPTAPTASSATSTTQIATTEFVH
                     NSSFGLDFTGAVSGFNVPWDAKSGVYRADVDGASEMVVHFHGSSASCTALQFQALFGNR
                     GLSYRSSIGNSGFPNPWEQIYTTAFKPLPADIGAISVSEIVGIPLPWPQSTAPSGWLKC
                     NGQSFNTSTYPKLAQVYPGGVLPDLRGEFIRGWDDGRGVDAGRGIGTSQGDAIRDITGS
                     MVGYNIGMTSGAFVTDTGTSAPFSAASGPNGFYYKYFRASAVVPTASENRPRNVAFNYI
                     VRAA"
     CDS             complement(2424..3068)
                     /codon_start=1
                     /product="Phage protein"
                     /label=Phage protein
                     /db_xref="SEED:fig|6666666.356832.peg.4"
                     /translation="MNNWESTIYAQYANSTALLSIINTFNQAVSIDEFTNEFINKVWDL
                     TANESYGLDVWGKIVGIGRYITAPIDSDAFGFYESNAGASDYPLPFNDSPFYAGVQETT
                     SVRLSDDAYRTLIMCKAFSNISIATIPEINKFLVMLFAGRGRAYCVNYRDMTIGITFEF
                     ALAPYEKSILTDYNVVPVPSGVQLNISQIAPPYFGFADDAYPFNDGTFYKG"
     CDS             complement(3065..4300)
                     /codon_start=1
                     /product="Phage protein"
                     /label=Phage protein
                     /db_xref="SEED:fig|6666666.356832.peg.5"
                     /translation="MATTTIETSVPSVSFSTSGLAVPDEADILSGRITDFSTALGSAMS
                     QDLSTPQGQISVSDSAIIADKNDQLLAIVNQINPDYASGRFQDAIGRVYFMERIAATGT
                     AVTATCSGLVGTIIPAGSLAQDVNGYIYASTSAATISSDGTVSVIFQNQTAGAIACPIG
                     ALTAIYQAVPGWSGVINNSAGVLGSLEESRANFEYRRKESVARNARNMDGAVLSAVLEV
                     NGVLDAYVWSNRTASVVNKGTTNFHVLGHSIYICAYGGSDSDVANAIFKTYNPGADMNG
                     NTTYTVYDSTNYGTPYPEYVMQWQKASPTRVYFTVNIDSTLNPPSNITQLVKNMVTTVF
                     TGGYEGIGKARIGASINAGKYYAPVISISPDTVSVLSIEISLTGSSYAPSVTMGIDQIP
                     TIQDSDITVNLV"
     CDS             complement(4307..4666)
                     /codon_start=1
                     /product="Phage protein"
                     /label=Phage protein
                     /db_xref="SEED:fig|6666666.356832.peg.6"
                     /translation="MQNRTLSLNSDTWDIQLDDSGNLAVVNNPYSVAQDVATACSLYLG
                     ECVYDNTIGIPYNTQIMGFIPGSGLIQSYLQNEAMRLDYVSTAQATIINDQQKRQSYGV
                     ITIVDTNGTTSTVNM"
     CDS             complement(4635..5282)
                     /codon_start=1
                     /product="Phage protein"
                     /label=Phage protein
                     /db_xref="SEED:fig|6666666.356832.peg.7"
                     /translation="MKKICELINSELSFFPELGIGHYPVPKNRPYDEGYFSKYASMAST
                     EMGRELTKFRINFVKKYHAGDVVDVGIGCGQFVSKCENAKGFDVNPAGVEWLHKNGKFH
                     DIYNEKASALTFWDVLEHIDNPEQAISQATEWVFVSIPIFDNAEHILKSRHFRKDEHIW
                     YFTDVGLRKWFLENGFECVDHCKTETELGRDGIDTYAFRRVANAKQDIITQF"
     CDS             complement(5266..6150)
                     /codon_start=1
                     /product="Orf12"
                     /label=Orf12
                     /db_xref="SEED:fig|6666666.356832.peg.8"
                     /translation="MQKLYIDGMQGIGDNIFQRAFIKRLCQTREIYLKTSIPEFYSDLP
                     NVNFIRSDTTLRTQRKNEQSSTIRYVQLPPVQMESRRIFYGNADLMRPGGIFSAARRVF
                     GCEPDGFDLPKFALPDIGLPKGRKIALIRPTTERSEWHHKSRGPLNKNIDAAAKLLHRR
                     GYFCVSVADTVPGAEWIPDLEPYADLKLHNGELKITELMALVNHADIVVTGPCLISQAA
                     LAYRTKMIFIGGGCGGSNHHSRITDASIMDLSQCLFVYPDNYCMCQEMKHNCDKRISNL
                     TEKITGWLNEKNL"
     CDS             6592..6723
                     /codon_start=1
                     /product="hypothetical protein"
                     /label=hypothetical protein
                     /db_xref="SEED:fig|6666666.356832.peg.9"
                     /translation="MLTAIIWQPEAAASRQSLAVSDGPEAMHIKFIGNKKPAGAGWV"
     CDS             complement(6741..7226)
                     /codon_start=1
                     /product="Death on curing protein, Doc toxin"
                     /label=Death on curing protein, Doc toxin
                     /db_xref="SEED:fig|6666666.356832.peg.10"
                     /translation="MAEFIDGVHYLSEDDLIFINKSLIEAQTPSEPVCVLNPNNLSSSQ
                     SRPSLTRYYQQTDDMFVLAAALIESLIQNHPFANANKRTAMMGGYIFLLINGYELTAPG
                     DDIVTMAEGLACKTYTCRELEDWLAYWSRTYDSRELCHPSDMSISDILQQRGGVNQP"
     CDS             complement(7236..7457)
                     /codon_start=1
                     /product="hypothetical protein"
                     /label=hypothetical protein
                     /db_xref="SEED:fig|6666666.356832.peg.11"
                     /translation="MDYTILLVITEVYIMSHALRKSERLYIPPRDKGVVASPRAAMGSD
                     CAHADQVKNAFAFGFARYEKAMEDLSKV"
     CDS             complement(7488..7631)
                     /codon_start=1
                     /product="hypothetical protein"
                     /label=hypothetical protein
                     /db_xref="SEED:fig|6666666.356832.peg.12"
                     /translation="MYKWGFDYALLIFLFACESKPWLDSVFTINLALRLLDALQVILTI
                     GL"
     CDS             7934..8566
                     /codon_start=1
                     /product="hypothetical protein"
                     /label=hypothetical protein
                     /db_xref="SEED:fig|6666666.356832.peg.13"
                     /translation="MQTAAKNTTMPYMIPEADFDRKLSVIKNNIEHTSSFLQKGIEDFS
                     LPGFVVPFGYRLVKSRDNEHYRLITDSQDSETVYAVKLLFRHDIINAKKTCTQILVWRT
                     IQAQHDSAVRGLPQVFFEFFLESYSIVVSDEEQTPDGRRFWERMISWAMSATGYHVYVS
                     DGTQESRPLTFMTSWDDFYTTWSEFCWGHDKECHRHRLLVISKDKLH"
     CDS             complement(8898..9056)
                     /codon_start=1
                     /product="hypothetical protein"
                     /label=hypothetical protein
                     /db_xref="SEED:fig|6666666.356832.peg.14"
                     /translation="MAGRSKPQTVGGHIPLSGVVLAARPAIYPKFRHKKSASLSGAVSA
                     VCGVLST"
     CDS             complement(9093..9329)
                     /codon_start=1
                     /product="hypothetical protein"
                     /label=hypothetical protein
                     /db_xref="SEED:fig|6666666.356832.peg.15"
                     /translation="MSAPRNPQFNVRIHPELKEKVAALAERNKRSINAEIVAALEAWVE
                     AAFTTNPAGSLTEIARSLEGLKLLIEKQQTPKQ"
     CDS             9482..10378
                     /codon_start=1
                     /product="Phage antirepressor protein"
                     /label=Phage antirepressor protein
                     /db_xref="SEED:fig|6666666.356832.peg.16"
                     /translation="MKSMAKVNADITIFKFDDRDIRVVMKKGDPWFVAADLCDALNLTN
                     SRVSLMALDDDEKDVSLIYTRGGRQIMSVVSESGMYTLILRCRDAVKPGTVPYRVRKWV
                     TADVLPSIRETGKYTKNYEDIEKTTVDDRTPLRSLVNRIMGKYGIPYQPIYKMIHREFG
                     VNHIDELSPKQAAEAMDYLAAKVIEGEFLGKQSLPATPPSPALTVQEMNRLVWLWDYAN
                     RSQAIFRELMPVMQQLQSSYHGVCCDYGYEFSAILSLSRDAVLKLTSGVDVQAPSDSIN
                     ISAWIRLKNNELPARLR"
     CDS             complement(10459..10839)
                     /codon_start=1
                     /product="hypothetical protein"
                     /label=hypothetical protein
                     /db_xref="SEED:fig|6666666.356832.peg.17"
                     /translation="MSIKGKDFVSAAKSCLDSGTESGLRSAISRAYYAFYHETCGILTH
                     CPPTTHDGVVEYLTKDARRKNEPFEFIALVQLGAVLKQQKMQRKRADYKLDETISASEA
                     ITSIAVVERMLAKIEEMKAKAA"
     CDS             complement(10836..11606)
                     /codon_start=1
                     /product="hypothetical protein"
                     /label=hypothetical protein
                     /db_xref="SEED:fig|6666666.356832.peg.18"
                     /translation="MAQTQKKGFRDTTIMLISHIETGSILDAFTLKRVLSDVEKIQDEP
                     TKLMISALAYGAAAQHEKAVSFFKEAASYRDEISAQNYLTYLGHTGHFEDYQNEAVRLG
                     REINSFNLCITARNAAYADGDGELTLFFARKAISMISDDNERNEMQMDVLNKKKQLEDF
                     IEVTSLYPSELKSLSLIASTIAKNHNALATSHDYYTSDDGDAAIICNVLCDDAEKLANM
                     DIDIAIALATNDSFASKNLTAWYRGNIETEISAS"
     CDS             complement(11666..11788)
                     /codon_start=1
                     /product="hypothetical protein"
                     /label=hypothetical protein
                     /db_xref="SEED:fig|6666666.356832.peg.19"
                     /translation="MTGKSHSGFNIGRHRDRTNTVTDAVLSNHVGKSLVGSNHE"
     CDS             complement(11760..12404)
                     /codon_start=1
                     /product="hypothetical protein"
                     /label=hypothetical protein
                     /db_xref="SEED:fig|6666666.356832.peg.20"
                     /translation="MNKKIVLLLALSAAGCAMTPEQIKEYQRTESETYEPVKEFWPNGH
                     GRTWYKSVKELKQDYLSHTGSNLTADTSKCGTDKNCYHTAYLSAFDNGIREFDEKEKQA
                     ADKKEKDCQASKECMDNRSITKYSQQLQMRYQYLLSSNPYQQSDIDYAVRTICERAAGQ
                     QSIGVPLDEVVTRLQDAPGLDPNSRIAIVDIAKSCWNLQQLKYDWKKSLRV"
     CDS             complement(12404..13006)
                     /codon_start=1
                     /product="Phage protein"
                     /label=Phage protein
                     /db_xref="SEED:fig|6666666.356832.peg.21"
                     /translation="MNPINQTPADISCEGNSLAFVFRQMLSRCSFVELAQVTAITGSTL
                     TVRRFVNPVDASGKKINDTDLIYNVPFMRLQHGQSAVIMNPSVGDVGLILVCDRDISLV
                     KSSGAQAIPGSKREHNLADAVYLGGIGLLNPTPTQYIEFADGGITIMAPNGMHIIGPVT
                     TTSTITAAGDIRAGNISVENHAHGGVQSGGSLTSGPQ"
     CDS             complement(13003..13857)
                     /codon_start=1
                     /product="Phage protein"
                     /label=Phage protein
                     /db_xref="SEED:fig|6666666.356832.peg.22"
                     /translation="MTYERRDIEIKFKLSEGSFDDKKENDTITLKGFKCEVSVSAYGGA
                     TGTVANARIYGLSMDIIAKLTSRTRRIIAQKQNQIEIIANDERIFSGSITSPMINANMM
                     PEAPIEIIAQATAYERTIPFPATSVAGKTTAQDLIKGIAGAAGFSFYNADVDVAVDNQR
                     FDGSAIDQIQSIARAYGFNADIDVGKVTIYTGKNPIDDKVVLISADHGMIGYPIFTELG
                     ISVTCLYSPLIKVCRKIRIESDLPHVSGDYLIQVGTSHYLSSQIEGGPWFSVITATPTE
                     WVQ"
     CDS             complement(13854..14153)
                     /codon_start=1
                     /product="hypothetical protein"
                     /label=hypothetical protein
                     /db_xref="SEED:fig|6666666.356832.peg.23"
                     /translation="MLSIAIAAEKSQEISITLGGQSCRIKIHQRTTGLYMDLYVGEKAI
                     MQGVICLNCNRMVRYKYLGFIGDLVFSDMEGDTDPVWDGLGSRYKLYYLEASDL"
     CDS             complement(14153..15025)
                     /codon_start=1
                     /product="hypothetical protein"
                     /label=hypothetical protein
                     /db_xref="SEED:fig|6666666.356832.peg.24"
                     /translation="MDLSGDVMSFSLNETTLLSAVKSRSIFSVINGAFAPTYGIYYNTI
                     DKNNTDKTKVVGQKVFTPSGWGSIEQSADAVIVNSPIEKGSYTSYNKVKKPREIRVQFL
                     LEGWSAFSGALPNLTNFSMLSRSNLIDILDEMRTSASTYNIETPDGVFESYDLAHYDYS
                     VTAKNGQTLLKVSAVFQAVMQTGEVVISSSTTKEQKTDNQRGTRNGAISTSKTISNTTP
                     VTLDEAKKAWASANSATAFAKALSTTGSAIVSGVVSAAETVSEAYDEATNANAEQIKDY
                     VSRFVKEIL"
     CDS             complement(15080..16327)
                     /codon_start=1
                     /product="Putative phage protein"
                     /label=Putative phage protein
                     /db_xref="SEED:fig|6666666.356832.peg.25"
                     /translation="MKIRKTIADIVDKEALGRLFLSKLSARDDGCLVWTGFTGFTGYGQ
                     LSFEGRVWSAHRISYEMSNGVIPQGANKWWVLHTCDNPCCCNPDHLYLGDAKDNAKDMI
                     DRKRQRMGFKRHGWGEQERFGRVFYEISGEIKTIFEWAEFFDVNPCTLEQRIAAGWPEK
                     DLGMSSKSYKRHLKSDGKTKYKRFSGLKEVEDYKNEASIAATNEASISTNRDGIIDMNT
                     LAKNTTSSTNEVANSGFIFEGSEIRAVMRDGEPWFIASDVCKSLDLSNPSKSVASLDDD
                     EKQIFNGDPNFKLGSAGNGAQSMIIINESGLYTLILRCRDSIKQGTLPWRFRKWVTNEV
                     LPSIRKTGRYQIEEKRQVVPVFRYVITLHYRDIVTGQEETISGGANTPEEIVRGTAKKF
                     GIFIPEMLNMPVNAYY"
     CDS             16308..16841
                     /codon_start=1
                     /product="hypothetical protein"
                     /label=hypothetical protein
                     /db_xref="SEED:fig|6666666.356832.peg.26"
                     /translation="MVFRIFIYHHQKYFTVSNSRDRIIIDSIYSLSQYYKELFMTKENH
                     FIKRMIARRVDQGLSQEDLSKRSGVAAAQISRYELGKSKPRPNVIARLAEALNVPFEWL
                     AYGDNDADPITIPGIPTRQIELPEDLVNIIKKKADEMGIPEYELIERMLAESLVHDGVI
                     ENVDDYYLLKKPDR"
     CDS             complement(17067..17264)
                     /codon_start=1
                     /product="Phage Rha protein"
                     /label=Phage Rha protein
                     /db_xref="SEED:fig|6666666.356832.peg.27"
                     /translation="MMLVMGFNGAKADAIKEAYINAFNWMTAELRKHSESYEAERNAVM
                     LEYIDEFSQGMTMVIESVTK"
     CDS             complement(17406..17915)
                     /codon_start=1
                     /product="Phage protein"
                     /label=Phage protein
                     /db_xref="SEED:fig|6666666.356832.peg.28"
                     /translation="MQYPTVSVNGVSVRVDDAGRYNLNDLHAAAVAEGKATESQRPSNF
                     IKSAQIKKFVQELTKATKIASVRVIKGGTQPGIWGLELVAIRYAAWLNVEFEIKVYQIF
                     QAVIRNGISAMSRLNKIDHIINTETKEISQCARKMASWGVGGRKRLLHSVREMVVDEVQ
                     MYLPGV"
     CDS             17936..18082
                     /codon_start=1
                     /product="hypothetical protein"
                     /label=hypothetical protein
                     /db_xref="SEED:fig|6666666.356832.peg.29"
                     /translation="MNLCRTGNQPIEGSPALADFLKGSFQRDWFDVDECACEALDELAN
                     LIR"
     CDS             18164..18430
                     /codon_start=1
                     /product="hypothetical protein"
                     /label=hypothetical protein
                     /db_xref="SEED:fig|6666666.356832.peg.30"
                     /translation="MNDKRIVELENQNRELKIRLRALEYAFMLSVVDMTPDGCRQISDG
                     FGHLQSDILKSMTDAEARENAAVTKQLKFLLRHVFIQGSTPSQ"
     CDS             complement(18596..20575)
                     /codon_start=1
                     /product="lytic transglycosylase"
                     /label=lytic transglycosylase
                     /db_xref="SEED:fig|6666666.356832.peg.31"
                     /translation="MPTVVDALVVTFGLDASGFNKGKKDVADGMKSTRDNSEQTAKFME
                     QQGKRASSFFGLIQKELLALVGLSLTATGVTSFVKNTTNGLMEISTQSKALRMSAQELD
                     GWRKAAEAAGSSAEKMSGTLGGLQTNLEAMRQGKSTPMSEALAMLTASTGVTVDYNDNA
                     SQAMAKIASGLQKEKNQDRARTIAQMLGIDDATLQSIQRGEFMPNVQKYTAKSGITDQD
                     IDTARKFNVQWTELHQNLEKTGYVIFNALSPYVQQFTNYLQELATWLSSHPQEIKSAIR
                     SVLDTFSEIASYVHKGVEAVSGWKNAFEILIGLKVASWVLGVVGAFGSLLKLGAGAAAG
                     SGAAAAGSGVVMAIAKRVGLLSLLAPSDTQSQTEEMSELERLKRKNWSANNPGIAYPES
                     QSQHQLEQINDTQQQGNSAQDRQHQDEKSFWSKALDMLGKIGDAIITPAGAASMTPNIP
                     GVTAPQASGKGKAMLDWMSGEFGQLEAKYGLPAGLLKSVATVESGGNQYAVSGAGAQGL
                     FQLMPGTARDLGLSGNDSFDPHKSAQAAAKYLNQLLSQTGGDLNKALAAYNWGIGNVQR
                     KGLGNAPLETQMYVPKVLAGMPTGAAATAPRYQSPITQQSAAPVYNFGQVTVTSNPTSA
                     SALSKDLQQQAGNRSRVLGFTAGN"
     CDS             complement(20575..20772)
                     /codon_start=1
                     /product="hypothetical protein"
                     /label=hypothetical protein
                     /db_xref="SEED:fig|6666666.356832.peg.32"
                     /translation="MVSDEIRGLADYVNIPRTIATVISANRATLHELDTVYGLEDLWAL
                     LEIITIDNYNAEVARRRSEQ"
     CDS             complement(20784..21251)
                     /codon_start=1
                     /product="hypothetical protein"
                     /label=hypothetical protein
                     /db_xref="SEED:fig|6666666.356832.peg.33"
                     /translation="MARKTLTFKVEAKNRDEGKTFLITEMPARQIEEWAIRVVSALMAA
                     NVEVPQPVYSAIQKLSAGAPENEADNELYNAVLVSGMAALAKFALTALGKIPFAESRPL
                     MDELMSCIQFQATPTTTIPLDDSHIEEMSTRFRLKTEVLKLHVGFLSAVAN"
     CDS             complement(21253..21687)
                     /codon_start=1
                     /product="Phage protein"
                     /label=Phage protein
                     /db_xref="SEED:fig|6666666.356832.peg.34"
                     /translation="MANSLTAADAIIQLTVTNLYPSGFQMESFEAQNIFDMGDTDLAET
                     IRTADGKLTGGFIFGDLPWTFHLTADSPTRSKLDTWYTTQQTSKAIFRCNGIVWLPSLG
                     MKYTMTNGILKRWKVIPAAARILQPVTGLIEWETVTPENA"
     CDS             complement(21690..23183)
                     /codon_start=1
                     /product="Phage protein"
                     /label=Phage protein
                     /db_xref="SEED:fig|6666666.356832.peg.35"
                     /translation="MSISLSKIVQILPGVLAASGSALDVNGLILSGDTRIPTGAVLNFT
                     TADDVKSYFGALSTEYTMAAKYFSGYNNASRLPGELLFAQYNELGVSAWLRSGSMASVT
                     IAQLQAMSGTLSLSINNTTVTTGNINLSAVTSFAAAATVIENAINTVKSSAQVSVRFDT
                     TQKKFYITTVSSGSNSAIGYASGTLSASLLLTSATGASLSHGANAAVVADLFTTILDQN
                     QNWVLFTTSFMPTKSQGEALAAWVTGQNNRFAYILMDNSVYAVTSGSTNAYAYDIINTY
                     NDGGTIPVYGTQEYAASLLAIPASFNFDLTNGRRSIAFRVQSGLASNVNTNADYSSLIT
                     NGYNFYGKYAANNIVTNQWYPGSITGSYKWIDAYIGQIWLNANLQSDIITLFQSEIYLP
                     YNDAGRAAIQNCMTSTVEQFKSWGGISAGTTLDDNQILAINSIVGTDVSTSLTTKGYYI
                     YIGPFTAAMRNARTSPTVYLWYCDGGFIQKLIVNSVEVQ"
     CDS             complement(23187..23609)
                     /codon_start=1
                     /product="Phage protein"
                     /label=Phage protein
                     /db_xref="SEED:fig|6666666.356832.peg.36"
                     /translation="MPEIGTDYIVMTPIDSVATSTNKWVHDGENGQKKTNRNSQWRCQI
                     DFYGPNAQNNAVIISTMIRDEYAAGWFSSNGSALSPLYSNDPHQTTMINGEQQYEPRWT
                     MDFIGQTNPVITTPQQYMTSANPNAVPVNVQFPPQG"
     CDS             complement(23720..24088)
                     /codon_start=1
                     /product="Phage protein"
                     /label=Phage protein
                     /db_xref="SEED:fig|6666666.356832.peg.37"
                     /translation="MDLFNITSGAVSLVNDYVPAVIKINTGYVTAPSGKRTPSYSQADV
                     SVQLQELSSMDLKQMDSLNVQGITRVAYVHGNFSAINRANQTGGDILVVNGNEWLIVKI
                     AELWYDWCKLIINLQRKT"
     CDS             complement(24075..24554)
                     /codon_start=1
                     /product="hypothetical protein"
                     /label=hypothetical protein
                     /db_xref="SEED:fig|6666666.356832.peg.38"
                     /translation="MGISGGDKMLSALQAIAEKTQISLSAGILAGATNEDMGELIAPYA
                     AANEYGTKTIPPRPFMRTSIDNHAKDWSQQLAKSLDGIGADPGVVKKGFDRLGLTIVQD
                     IRDSIESSIPPANAKSTIDAKIRKGRKEPDKTLIDSGSMQRAVDYEINGGDDGSV"
     CDS             complement(24558..24971)
                     /codon_start=1
                     /product="Phage protein"
                     /label=Phage protein
                     /db_xref="SEED:fig|6666666.356832.peg.39"
                     /translation="MGVVVFDAAEFLTSYPNFSTLTTGQLTNAFSTACLYLDNTDGSIS
                     PYDPDNGEIERKTLLYLLTAHVSQSLQWAAKGVSSPLSSASQGSVSSSFATAVPGTKSW
                     FMLTGYGQQYWQATRKYVVGGRYHVQRYYHPWG"
     CDS             complement(24974..25330)
                     /codon_start=1
                     /product="hypothetical protein"
                     /label=hypothetical protein
                     /db_xref="SEED:fig|6666666.356832.peg.40"
                     /translation="MSGKIHVRLNHPHGIHFDGTGVTLKGNAFHLLGQEKGVLPTGLFG
                     HTVVDADKWELVKSTYPDLIRNLERNNTLVYHAEDASSVAAAKERRESRHGREPVDVEK
                     DPTVKTKEVTDEVA"
     CDS             complement(25410..26420)
                     /codon_start=1
                     /product="Phage capsid and scaffold"
                     /label=Phage capsid and scaffold
                     /db_xref="SEED:fig|6666666.356832.peg.41"
                     /translation="MNITFDQAKQYGFVFPGGRMWITPENRAAIAQDAALITSANSTVP
                     AELLAYIDPTVIEIMTAPRNARELYPEEKKGDWTAPYFKWRASEITGNTAAYSDFGQFG
                     VAGVNQEWFTREQYRFQTIIQYGDLEADMASQAKINLAADKQRAAATIIDIDANKFYLL
                     GVSGKEIYGVLNDPNLTAAITAAATGTGSSTAWSAKTTVQRYNDILTLFTRLVNQLQGL
                     VSEKDELILTMSPGLRTLLGGATDFNVSVLKMLETYFSNLTIVSLPQLSSGGVETMMFI
                     APKVLGNETGLLGFGEKMRMGRIIPGLSSYSQKVTSTTYGGVIRVPAAVAQMTGM"
     CDS             complement(26494..26988)
                     /codon_start=1
                     /product="hypothetical protein"
                     /label=hypothetical protein
                     /db_xref="SEED:fig|6666666.356832.peg.42"
                     /translation="MGLQSQVNQFYAPAVKGDRASQNPVVYLPFNPRAENTVYVGQFVF
                     AGSDNTQVKSSTSGSDAPVGFIERLLNYYNFTLTSGSTMTLPDNTSLTVAKIGEFYVTY
                     DNSSVPTVGQKAFASKTNGSVHFAAAGATVSGFVETTFVCKGVDSTSGLAVISNWNPAS
                     A"
     CDS             complement(27002..28516)
                     /codon_start=1
                     /product="Phage protein"
                     /label=Phage protein
                     /db_xref="SEED:fig|6666666.356832.peg.43"
                     /translation="MPVHKKNGRWWFGSKGPFPTREKAEEAEKAAYANGYIGDRKIALD
                     SEPSRRRIDENGYLHVSQTHLTKEQVAPYLGKEIPGWQELNLEPERVYYGYRSGEELEK
                     ARDTFNGMPLLREHRQDSADAPLKEFRIGSIGTTPVWSAPYLDNALIVTDSDAIEKINN
                     GTLREISCGYFFEPDFTPGEFNGVNYDFVMRNLRGNHVALVEKGRAGPDVYVHDAMPSN
                     LSQKKVIDTMKKLNRKGVALRSALAAHLKPLLAQDAAPGELTALVRANKTPVAIAKAAV
                     QKFAPLLAQDIEIDPTELAEALEAAEQVVEPEEKQIGDGVEEEPQQEEESPAYDAESPA
                     ESIKQILEQASVPPETIDAVLKCLMVPANDENGSAGGAEGGQENQEKKDVVTQAVMDAA
                     IKSATEKVAQAERERAKALTTAASKVEGLCGKVDAMAFDSAADIYAHALKAKGIDTSKF
                     EPAGYAGMVEIMLQQKQSQPAPVGDSAFNKPAKLDGKFAGLANIRL"
     CDS             complement(28601..29293)
                     /codon_start=1
                     /product="plasmid-related protein"
                     /label=plasmid-related protein
                     /db_xref="SEED:fig|6666666.356832.peg.44"
                     /translation="MNNSVNYWLVAEYKRQESKIVGDASPAKSVHSRLLEIMAGWQKKF
                     DERAKEIALWFVNRSNTYASTSVSNKLRAAGMTVNFKVTPEVKNVLDSLYETQVTLIKS
                     IPEQYLTQIGVLVQESVTRGRDVGYLKDELKKRYGVTERRAKVIARDQNAKASNAIAVE
                     RCKSAGITEAIWVHRAGGSKTYRESHVKMNGEVFSISKGCWDPHERQHVMPGQLVNCKC
                     DMRPVIPK"
     CDS             complement(29277..30764)
                     /codon_start=1
                     /product="Phage protein"
                     /label=Phage protein
                     /db_xref="SEED:fig|6666666.356832.peg.45"
                     /translation="MSDPTYALPTIEQIKSMYGPARTLHTPDSARMAMDHSMEDAGGYA
                     LIQHAFEMGQGYSLGPSFMGYAALSSLMQNGLIRACIETVADDMTREWIEISAVDTNGD
                     GDSSDEKKTLDDALIDFCVRQVFHKAAEFDGYFGGCLIYIDTGADDRDLLTPLDISEMS
                     AELKNLKRFTVIEPINVFPGLYQSTNPLQSDYFEPRTWWVLGKEVHASRIIRICGNEVP
                     VLLKANYNFLGVPQAQVLYDYVIHFQDARVAESRLLDKFSQTVLMTDMQDILTNPNSTK
                     SLDSRLAYMSAYRSNDGILAIDKEMEEYVNINTPLSGVTDIVRQQLEMIVAINRTPAVK
                     LLGISPAGFNTGDADLKNYNDHISTQQEKVFRKGLQKVLDILQIVKLGKLNRSVTFDFV
                     SLNESDDKAAAEAQSIRAQTHATYLENGVLDAMEVRKLLANDPASGFAGIDADAVPEMQ
                     NEEAETENSQGDVSERGSGNGISPEVDIANQGNEQLG"
     CDS             30763..30924
                     /codon_start=1
                     /product="hypothetical protein"
                     /label=hypothetical protein
                     /db_xref="SEED:fig|6666666.356832.peg.46"
                     /translation="MDSIFAIIAADVVNPRRVLGVASPRRADAVFLFLRDIVPLAEWTT
                     RPMLGLFD"
     CDS             complement(30880..32166)
                     /codon_start=1
                     /product="Phage terminase large subunit"
                     /label=Phage terminase large subunit
                     /db_xref="SEED:fig|6666666.356832.peg.47"
                     /translation="MSVARIELPPKLIPVFSGEARYRGAYGGRGSAKTRSFALMTAIRA
                     YMFAEAGVSGVILGAREFMNSLEDSSMEEIKQAIRSVSWLSDYFDIGDRYIRTKNRRVW
                     YAFSGLRHNLDSIKSKARILIAWIDEAETVSEIAWQKLLPTVREEGSEVWVTWNPEKDG
                     SPTDTRFRKKKPDGAKIVELNYTDNPWFPDVLDQERLNDRDRLDDQTYAWIWDGAYREN
                     SDAQILAGKYRVAEFEPEAHWDGPYYGIDWGFSQDPTAGVKCWVGNDRLWIEYEAGKVG
                     LENDDIADFMIQRLPEIEEHVIRADSARPETISHVKSTGNGKRNNLPKITGVEKWTGSV
                     EDGIAHLRSYKEIIIHSRCKEWLKEARLYSYKTDRLTGDVLTDIVDAHNHFIDATRYAL
                     APMIKGKGKININPALIKQAQHRARRPFR"
     CDS             complement(32147..32572)
                     /codon_start=1
                     /product="Phage terminase, small subunit"
                     /label=Phage terminase, small subunit
                     /db_xref="SEED:fig|6666666.356832.peg.48"
                     /translation="MTGLTIKQETFCQAYIETGNASEAYRTAYAADKMKPEAIHVNASK
                     LLDNAKVALRVSELQGEIKQRHNVTVDSLLAELEEARQAALGAETPQSSAAVAATLGKA
                     KLTGLDKQIVDHISSDGSMSPKPSVIKLVAPDVSSTD"
     CDS             complement(32704..33003)
                     /codon_start=1
                     /product="hypothetical protein"
                     /label=hypothetical protein
                     /db_xref="SEED:fig|6666666.356832.peg.49"
                     /translation="MEVTKELLTALYWGGGLSVAGVALRLGCSEESARRLSFQPASPLL
                     AFWARLCQTRNKSFFPFMMAKSGEAVYVGDNTTGTVTNLTTAQFTSKYGIAPFN"
     CDS             complement(32994..33383)
                     /codon_start=1
                     /product="Adenine-specific methyltransferase (EC 2.1.1.72)"
                     /EC_number="2.1.1.72"
                     /label=Adenine-specific methyltransferase
                     /db_xref="SEED:fig|6666666.356832.peg.50"
                     /translation="MTYTLHNSDCLDVLRTMPESSVDSIITDPPYGLKFMGKKWDYDVP
                     DVDVWAECLRVLKPGGHLLAFAGTRTQHRMAARIEDAGFEIRDMIAWVYGSGFPKSRDL
                     WRVDIRAEVERQLRAKGVEGDIEWK"
     CDS             complement(33621..33764)
                     /codon_start=1
                     /product="hypothetical protein"
                     /label=hypothetical protein
                     /db_xref="SEED:fig|6666666.356832.peg.51"
                     /translation="MVVDTSCNWVKPIYLTVNDVKVLDTQTKKDILAHNRSWQANCEGK
                     SK"
     CDS             complement(33754..34035)
                     /codon_start=1
                     /product="hypothetical protein"
                     /label=hypothetical protein
                     /db_xref="SEED:fig|6666666.356832.peg.52"
                     /translation="MSIDMILTAIAAVIAAIAAAFGLGHSKGKNEAKSAAGKAESESVI
                     TATKTVAERQVKVTKEASDVKETINHLSDSAVDNELLNNWTRPGSGGR"
     CDS             complement(34032..34238)
                     /codon_start=1
                     /product="hypothetical protein"
                     /label=hypothetical protein
                     /db_xref="SEED:fig|6666666.356832.peg.53"
                     /translation="MKIIEDWKQAWRWFSVHALAISGAIPAMWVSLPDEFKTAIPAGAM
                     SIITAVVAVAGIVGRVIQQGQQS"
     CDS             complement(34235..34717)
                     /codon_start=1
                     /product="Phage lysin, 1,4-beta-N-acetylmuramidase (EC 
                     3.2.1.17) or lysozyme #Protein S in phage lambda"
                     /EC_number="3.2.1.17"
                     /label=Phage lysin, 1,4-beta-N-acetylmuramidase
                     /db_xref="SEED:fig|6666666.356832.peg.54"
                     /translation="MNKNLTAFLDVLAFSEGTSTHPITRNRGYDVIVTGIDGKPEIFTD
                     YQNHPFANGRPGKIFNKQGQRSTASGRYQQLYRYWPTYKAQLKLPDFGPNSQDALATQL
                     IRERKALDDVIAGRIQSAIGKCCNIWASLPGAGYGQREHSIDTLIVVYKQSGGVVA"
     CDS             complement(34725..35024)
                     /codon_start=1
                     /product="hypothetical protein"
                     /label=hypothetical protein
                     /db_xref="SEED:fig|6666666.356832.peg.55"
                     /translation="MVGNNDIKIFGKYSIRFMPLLFIALTAFCGYQIGQESSAMTRRLT
                     AANMQNSRLSSENAKLTTQQNQPNVTVIVPSEQQRSQSVQRNYAELRNSSDIRF"
     CDS             complement(35008..35301)
                     /codon_start=1
                     /product="hypothetical protein"
                     /label=hypothetical protein
                     /db_xref="SEED:fig|6666666.356832.peg.56"
                     /translation="MYDGQQLIAALIAAAMTLIGSVAKYAYTSSKNVPIRNHIVISAFA
                     GAMMYLLGIQQGWSLPLVGMCCGLAGWHGASIIRRINPPGVNINGDDDGRKQ"
     CDS             complement(35330..35461)
                     /codon_start=1
                     /product="hypothetical protein"
                     /label=hypothetical protein
                     /db_xref="SEED:fig|6666666.356832.peg.57"
                     /translation="MVNISTTMRKLRVVIVLDLFVAIKRIQTPAQLLGFFISALHGR"
     CDS             complement(35532..35696)
                     /codon_start=1
                     /product="hypothetical protein"
                     /label=hypothetical protein
                     /db_xref="SEED:fig|6666666.356832.peg.58"
                     /translation="MLDDDTVGTVNEDTIDGDLNDFIGETLNVHLRDENGNPIEKTGKI
                     VEILDEENI"
     CDS             complement(35807..35989)
                     /codon_start=1
                     /product="hypothetical protein"
                     /label=hypothetical protein
                     /db_xref="SEED:fig|6666666.356832.peg.59"
                     /translation="MKLADYIDQNFGGSRAEFARHMGVPPQKITKWLSSETIVHIDDDG
                     RAFLCTVRREIPVTK"
     CDS             complement(35991..36488)
                     /codon_start=1
                     /product="hypothetical protein"
                     /label=hypothetical protein
                     /db_xref="SEED:fig|6666666.356832.peg.60"
                     /translation="MKLFHGSCSTVAPAIKVGAFEMLGASENVFDGIFASGDWDAAASH
                     GNGNIFTYIVDEERVAESRDLDANFEEIVRFLLDQYEINSENMDRVNELARAIVDDENQ
                     DDEFADVLLFPRLGSDIGGAYSWEIQRLRGRVAAHLGFDAVEMRDEHGTSYLIVNPKIT
                     AE"
     CDS             complement(36647..37492)
                     /codon_start=1
                     /product="Phage antitermination protein Q"
                     /label=Phage antitermination protein Q
                     /db_xref="SEED:fig|6666666.356832.peg.61"
                     /translation="MGCISRAEEIQVNLESIPKFFSPKSPKLSDESPATASDRLGISDV
                     MAAIGMSHQSSGIGMDLFLAKIGVSSPDKAIEGLIEIAKSLAGHCKPLSELDADSKLRA
                     LQLLATFAYHDYARSAASVKRCPDCDDGFIDVEVFSLKAAYGKRVIDAMPKIEMLDKPL
                     ACNVTHERREIVRVQCPTCKGRGLVSNSCRCRGRGIVIDERATAINGGIPVTKECERCH
                     GTGYSRLPAESVRRALCAAGVEISQPTWSRHVKPMYERLVSACHQAESTAEINLRRVTS
                     "
     CDS             complement(37563..37712)
                     /codon_start=1
                     /product="hypothetical protein"
                     /label=hypothetical protein
                     /db_xref="SEED:fig|6666666.356832.peg.62"
                     /translation="MIDKIPTHVTAELLRLEKEISDHEKSIEWKNERRREIINRYSLNK
                     GDKS"
     CDS             complement(37728..37913)
                     /codon_start=1
                     /product="hypothetical protein"
                     /label=hypothetical protein
                     /db_xref="SEED:fig|6666666.356832.peg.63"
                     /translation="MFTNINAAIEEARYLRATEKHHHCVIQKRDGTMRVSQEMSTTRER
                     LRKKKYTQHGKIDSEL"
     CDS             complement(37913..38140)
                     /codon_start=1
                     /product="hypothetical protein"
                     /label=hypothetical protein
                     /db_xref="SEED:fig|6666666.356832.peg.64"
                     /translation="MTKIIYPCETAAIFQDVIFIIRAQSRSDLFNEIDKAENFYLSYFP
                     YATLENIWDGIRYSFNGLYLNAMQANREAA"
     CDS             complement(38137..38499)
                     /codon_start=1
                     /product="Holliday junction resolvase / Crossover junction 
                     endodeoxyribonuclease rusA (EC 3.1.22.-)"
                     /label=Holliday junction resolvase / Crossover junctio
                     /db_xref="SEED:fig|6666666.356832.peg.65"
                     /translation="MTEYHLKLPWPPSLNTYWRHARHGHYISEKGKEYRQRIIQIIQQQ
                     NLDINTPARLKISIIASAPDKRRRDLDNLQKAVFDSLTHAGFMLDDEQIDDFRVRRGDQ
                     VKGGSLDIVIIELGKV"
     CDS             complement(38503..38991)
                     /codon_start=1
                     /product="Phage-associated homing endonuclease"
                     /label=Phage-associated homing endonuclease
                     /db_xref="SEED:fig|6666666.356832.peg.66"
                     /translation="MLSHRQLIELINYDESTGIFTWNVDRTGGVKKGDEAGYINNLGYR
                     MIKLFGELHLAHRLAWFYKHKYWPSNLDHLDRNKDNNSLNNLRECSKSENQMNRAVPSN
                     NTSGVKGVVWNKRTSKWQAQAGLNGKRYYLGLFNELSDAKNAYISFCKENHGEFYAGD"
     CDS             complement(38985..39275)
                     /codon_start=1
                     /product="Phage protein"
                     /label=Phage protein
                     /db_xref="SEED:fig|6666666.356832.peg.67"
                     /translation="MANLRKEARGRECQVRLQGICNGNAETVVLAHYRMSGICGTGMKP
                     DDLFGAWTCSSCHDEIDRRTRLTDADSAHLAHLEGVIRTQAVLLAEGKIKC"
     CDS             complement(39268..39558)
                     /codon_start=1
                     /product="hypothetical protein"
                     /label=hypothetical protein
                     /db_xref="SEED:fig|6666666.356832.peg.68"
                     /translation="MAELRIGGMAIIVYSINHENIGRVVNLFEFLGAVDYGPHKNRNDI
                     WRVNSTNSPLYGVKGIIQPGQNCKCPGAWLMPIDGDDFTHEDEREKELMNG"
     CDS             complement(39551..39727)
                     /codon_start=1
                     /product="hypothetical protein"
                     /label=hypothetical protein
                     /db_xref="SEED:fig|6666666.356832.peg.69"
                     /translation="MLTQNQITDYQRQCIERAGYCIQCGGGLKENEVYACEKCTDELLG
                     GDVMDIVREENNG"
     CDS             complement(39702..40013)
                     /codon_start=1
                     /product="Phage protein"
                     /label=Phage protein
                     /db_xref="SEED:fig|6666666.356832.peg.70"
                     /translation="MTTKNDVGKWRFSLLPLGAIKSVVDVLEFGAKKYAIDNWKTVPDA
                     RRRYFDASIRHITAWWDGERLDDESGLPHLAHAICCLLFLMWIDENPEKYNANSESNN"
     CDS             complement(40152..40625)
                     /codon_start=1
                     /product="Protein NinB"
                     /label=Protein NinB
                     /db_xref="SEED:fig|6666666.356832.peg.71"
                     /translation="MKQTYLLRNEAIRNNAIDTILALPIDDKSPHEIHVKEPKRSKAQN
                     DRMWPMLQDVSRQVLWHGKRYDESDWKDIFTALWLKTKRQEQRSAPGIDGGVVLFGVRT
                     SKMRKASMTELIEIIFWFGSERSVKWSDESRREYEWAQRSGGEGDEKPNPSSL"
     CDS             complement(40728..40991)
                     /codon_start=1
                     /product="hypothetical protein"
                     /label=hypothetical protein
                     /db_xref="SEED:fig|6666666.356832.peg.72"
                     /translation="MRSEFEAWFKPQKEEMMRNGASLLSIKKLHKSSWEAWQASRAALV
                     VEIPAAMGAHQVAWEGDDWNMMREHAANAIRAAGITVQGRKP"
     CDS             complement(41069..41200)
                     /codon_start=1
                     /product="hypothetical protein"
                     /label=hypothetical protein
                     /db_xref="SEED:fig|6666666.356832.peg.73"
                     /translation="MSAWLPVVGKHGHGFDVCIATSRRINIRTHVLGAGYNDTGDGV"
     CDS             complement(41202..41552)
                     /codon_start=1
                     /product="hypothetical protein"
                     /label=hypothetical protein
                     /db_xref="SEED:fig|6666666.356832.peg.74"
                     /translation="MTDRELLELAAKAAGMGPLDFDYAEREGHGLYFGPRLPAPKNKIM
                     AAMHSYWNPLTNDGDAFRLAVELRMRVSITTESALAETIAGLSVRVNGADELAATRRAI
                     VEAAAEIGRRMV"
     CDS             complement(41545..41961)
                     /codon_start=1
                     /product="hypothetical protein"
                     /label=hypothetical protein
                     /db_xref="SEED:fig|6666666.356832.peg.75"
                     /translation="MKTSELSGAALDWAVATADGHEIKYDPMDFGIGANGGYWIWGDEL
                     SDPKLKIGSFDKMGYSPSTHWKECAPLIEKYGIWLSDDEDENRLTHIASIHPHVDNAIQ
                     RGETQLIAICRAVVASVLGEEVEVPQELVEVGHD"
     CDS             complement(41983..42183)
                     /codon_start=1
                     /product="hypothetical protein"
                     /label=hypothetical protein
                     /db_xref="SEED:fig|6666666.356832.peg.76"
                     /translation="MQIELNEFEQDELTQLITCFFQDGFESEHLESVLKRLTQDEDAEP
                     YVCPKCGGVGWSAGCDECIPY"
     CDS             complement(42226..42405)
                     /codon_start=1
                     /product="hypothetical protein"
                     /label=hypothetical protein
                     /db_xref="SEED:fig|6666666.356832.peg.77"
                     /translation="MKTTYQELILALQSFFGVEQSFSVIEILGQMSTGDIIDVIVDALN
                     EYHAVGEGNINKQE"
     CDS             complement(42402..42887)
                     /codon_start=1
                     /product="hypothetical protein"
                     /label=hypothetical protein
                     /db_xref="SEED:fig|6666666.356832.peg.78"
                     /translation="MNVIKLSQVHLIQSAGIDGQERIEYEPIYIQPSHIESFFSAGRTV
                     LRMTSGDRIEVKETPEYIISHMHVTLGDSMQNEREMLDAIMAEQRSRKSLWTPKVNIKP
                     ALKQTHRQAIAQAKIESLNSALAIVRDKLRLEKSERMRIGMLSAISEIERIRDEVRP"
     CDS             complement(42912..43121)
                     /codon_start=1
                     /product="hypothetical protein"
                     /label=hypothetical protein
                     /db_xref="SEED:fig|6666666.356832.peg.79"
                     /translation="MAEIIDFLSRTRAISNRKDAIEFKELVMGQLNGVKCADAESAENL
                     QQAKASIERVFDLIIEFSDWDVDA"
     CDS             complement(43121..43714)
                     /codon_start=1
                     /product="hypothetical protein"
                     /label=hypothetical protein
                     /db_xref="SEED:fig|6666666.356832.peg.80"
                     /translation="MNDTEKPKFAQSMAAIGEIYGKEISEVMIGIYWNALKPYPSEDVQ
                     RAFQGHTRDTDNGQFFPKPADLLRHIEGNKDGRALQAWSKAYKAICSYGRRNSVVFDDP
                     AIHAVISEMGGWIEFAGVTEEELPFRAREFEKRYRAMLITGVQKCETILIGMDDAQNIR
                     SGFQEAPKPFLLGDVTKAKQIRNGMFLIENKGAA"
     CDS             complement(43714..44637)
                     /codon_start=1
                     /product="Origin specific replication initiation factor 
                     #replication protein O"
                     /label=Origin specific replication initiation factor #
                     /db_xref="SEED:fig|6666666.356832.peg.81"
                     /translation="MNTAEVIKFPGPEPGQEKRVADLDDGYTRTANELLEAVMLSGLTQ
                     HQLLIVMAVWRKTYGYNKKMDWIGNEQFAELTGMAATKCSTARNELIRMGVLVQQGRQV
                     GMNKAVSEWKTKFNGFSKTFTESVKKTFPKSVKSDLPKRSNTKDNITKDNKDSITPIVP
                     AGDACEKPPEQDEEKPPEQPASQAIKTVFSHWQAEHNHLTSKLDQKRRKRINARLDEGF
                     TVADLCKAISGAKYDSWLMGKNPSNKRYDGIETILRDAAQVEKLRDLDDNEHAKAIAAG
                     KYSATTARNLDRLQRWAGEGDSGAPF"
     CDS             complement(44647..45183)
                     /codon_start=1
                     /product="Phage protein"
                     /label=Phage protein
                     /db_xref="SEED:fig|6666666.356832.peg.82"
                     /translation="MILTVSKTALLSAMIFQAKADVRYYLNGICFAPDKKLYSTDGHRA
                     FIGQHETDGLEDRVIVAIKGAKPTRFEKAEIDTDTGNVSYLDAHGLRVGAGLCEVIDAR
                     FPDIERLTSKFESKPTDEIGFNAGYLADIEKAAKLYNPKFCGIKIKPNGNTEASIVEFN
                     SAFGNGTLVIMPMRI"
     CDS             complement(45202..45495)
                     /codon_start=1
                     /product="Phage repressor protein C1"
                     /label=Phage repressor protein C1
                     /db_xref="SEED:fig|6666666.356832.peg.83"
                     /translation="MERAKTRKEALHIESALLNKIAVKGVSAIAEAVGVNPSQITRWKE
                     TLIPRMSLLLAVLEWGVDDDELAHLAKQVALLLIKKKSASGKDTDSQISMEF"
     CDS             complement(45598..45813)
                     /codon_start=1
                     /product="hypothetical protein"
                     /label=hypothetical protein
                     /db_xref="SEED:fig|6666666.356832.peg.84"
                     /translation="MINTQTTPLEKAVAAVGGSQKNLAEKVGVTPQAINMIKRRGGRLP
                     ARKMNKFLAATGLSKEELYPDIFSAA"
     CDS             45931..46644
                     /codon_start=1
                     /product="Transcriptional regulator"
                     /label=Transcriptional regulator
                     /db_xref="SEED:fig|6666666.356832.peg.85"
                     /translation="MKTAEDRIEYIIDSEGIRQKDLARMVNATPQTVNNWKKRNSISKD
                     AAKKIAEMYGYSLEWVLDGTGSPKPIINRESTVPPESEWDTVDAWDKKTPLPSDEVEVP
                     FLRDIELAAGDGRISEDDYNGFKLRFSKATLRRVGANTDGSGIFCFPARGNSMEPNIPD
                     GTTVAVNIDDKKIVDGKIYAINQDGWKRIKLLYRTGPDTLSIRSYNSAEHPPEEAAISN
                     VEIIGRVFWWSVIDY"
     CDS             46727..47668
                     /codon_start=1
                     /product="hypothetical protein"
                     /label=hypothetical protein
                     /db_xref="SEED:fig|6666666.356832.peg.86"
                     /translation="MEASGIAETDDMKFRIVYDGPALDNHEMDVRDLAPALLSLSDALE
                     EAGKTIYGKERRVSVKVNASFKAGSFGVDLIAQSSSLTSQIIGAFSGNSASAACNIISL
                     VGFGYLASKQSYKGLLQLIKWLGPRKIKRIEPTFDGCTEIFTDGESEVFESQVIELYKN
                     KKLRRSLENVITKPLERDGIDSFAVTIDNGKTFVEVSKDEAIFFKVDNIEESIISESIT
                     EKALQPLDISFREGHKWQFSDGASPFQAEVSDERFLKAIDDQSIAFAKGDLLLVDLKVT
                     QYLAEKGIKTTYEIVNVKKIINPQRQIEFPFE"
     CDS             complement(47628..47741)
                     /codon_start=1
                     /product="hypothetical protein"
                     /label=hypothetical protein
                     /db_xref="SEED:fig|6666666.356832.peg.87"
                     /translation="MLIYVFKTKGIEDGHKKPGAEPGGITRRGIQFAVVGL"
     CDS             47986..48225
                     /codon_start=1
                     /product="hypothetical protein"
                     /label=hypothetical protein
                     /db_xref="SEED:fig|6666666.356832.peg.88"
                     /translation="MPRNTHKNLARAIAHRAAQQADIRLARKIEAAISGCSERVTKALI
                     ELPRVTEVDSGATCIPDVALFRAGYRKSENISAR"
     CDS             48228..48458
                     /codon_start=1
                     /product="hypothetical protein"
                     /label=hypothetical protein
                     /db_xref="SEED:fig|6666666.356832.peg.89"
                     /translation="MKDRPNKILLTCIQNNEHSPERLINQKRMVEMAISAWSIGGNCYD
                     ENKHIAGYCEEQRGYFYEALNLINNLLVKFN"
     CDS             complement(48485..48661)
                     /codon_start=1
                     /product="hypothetical protein"
                     /label=hypothetical protein
                     /db_xref="SEED:fig|6666666.356832.peg.90"
                     /translation="MFRCCYLFGYIQRIYRPYPLTQLLIGCNKLYGDAVRYKQCLYIRT
                     PVLASPHPIEFMW"
     CDS             48667..48834
                     /codon_start=1
                     /product="hypothetical protein"
                     /label=hypothetical protein
                     /db_xref="SEED:fig|6666666.356832.peg.91"
                     /translation="MDGTTLPVYVDADFGLYAIEEYEKGEPCNHSLQDLREDGVDFTLV
                     NINNLISTER"
     CDS             48838..49119
                     /codon_start=1
                     /product="hypothetical protein"
                     /label=hypothetical protein
                     /db_xref="SEED:fig|6666666.356832.peg.92"
                     /translation="MGKYIIVWNENKTQGILLSQENETIDTYDDAFHAGGGMEQGNVAS
                     LADAFRNIYGEEQQCSYQCVDIENENSIPIEHDSSTWDDDWDYEDANN"
     CDS             49189..49455
                     /codon_start=1
                     /product="hypothetical protein"
                     /label=hypothetical protein
                     /db_xref="SEED:fig|6666666.356832.peg.93"
                     /translation="MTKKEKQFVDDMIRCRGIDFARIGMMVEVYGDIGTIVGMNGSANL
                     DVVFTNQLKYGKHPENCHPICEVKYFDADGKVIADYTTKNTAA"
     CDS             49543..49734
                     /codon_start=1
                     /product="hypothetical protein"
                     /label=hypothetical protein
                     /db_xref="SEED:fig|6666666.356832.peg.94"
                     /translation="MAYTNVGAIPMGSSQPVFEFDAIKSIQHARVNILASSSFTTKSWL
                     QRLFEQIVATVNQKGCPL"
     CDS             49731..49925
                     /codon_start=1
                     /product="hypothetical protein"
                     /label=hypothetical protein
                     /db_xref="SEED:fig|6666666.356832.peg.95"
                     /translation="MSQSVETLFPKTRVAAASWHHHCLIMAGECRKMGNIGAAANHLYS
                     AAIARLNFQHFTPSGKEPF"
     CDS             49936..50799
                     /codon_start=1
                     /product="DNA, complete sequence"
                     /label=DNA, complete sequence
                     /db_xref="SEED:fig|6666666.356832.peg.96"
                     /translation="MKFERAVRKKARLRLALTGPSGSGKTYSALLVAKGIGGKIAVIDT
                     EKGSASLYSDIADFDVLELEPPFSPERFIEAIHAAEIAEYDTLIIDSITHEWAGVGGCL
                     ELVDTIAKNKFRGNSWSVWSEINPRHRLFLDAILRSNMHIIATMRSKTETAQVEENGRK
                     KVAKLGMKSEQRDGVEYEFTTVLDIGHETHHAIASKDRTKIFSNADPVILSEAVGARLL
                     EWLDSGVNQHDEALKHFTEAAASAKSVDELKSAFEEAWRTLRGSTQQSDAKSVYDIRKS
                     ELEESA"
     CDS             50800..51399
                     /codon_start=1
                     /product="Single-stranded DNA-binding protein"
                     /label=Single-stranded DNA-binding protein
                     /db_xref="SEED:fig|6666666.356832.peg.97"
                     /db_xref="GO:0003697"
                     /translation="MASRGVNKVILIGNLGQDPEVRYMPNGGAVANLTLATSDSWRDKQ
                     TGEQKERTEWHRIALYGKLAEIAGEYLRKGSQVYIEGQLRTRKWQDQSGQDRYTTEVVV
                     DISGSMQMLGGRAGGGAPAGGGIGGNMGGGNAPQGGWGQPQQPQQANQFSGGGQSQSRP
                     QQSAPMPGNEPPMDFDDDIPFAPIGLQFNKHSIHSI"
     CDS             51496..52101
                     /codon_start=1
                     /product="Exodeoxyribonuclease VIII (EC 3.1.11.-)"
                     /label=Exodeoxyribonuclease VIII
                     /db_xref="SEED:fig|6666666.356832.peg.98"
                     /translation="MVIHNAWWNKLNNIMIDLETMGTNPHSPIVAIGAVFFNPVTGELG
                     KTFYRTVDLESSMKLGLTPTANTIKWWMNQDKKVVEEVIKAKSSITDALTALSQFAVFA
                     YSPAANYGGSLLKIWGNGSAFDNVILRESYKACHLTPFWEFWNDMDVRTIVDMGRCVGF
                     DPKRDIPFDGDRHNALADAVHQAKYVSAIYKKLLNKPN"
     CDS             52171..52401
                     /codon_start=1
                     /product="hypothetical protein"
                     /label=hypothetical protein
                     /db_xref="SEED:fig|6666666.356832.peg.99"
                     /translation="MMLEYQLDKKNKSEAIKKIQLGFGGELKKESNYDRWLKMIVYRTS
                     FHPLPKQDNKFFIQDSFGKYRGYGQGRVMGD"
     CDS             52415..52603
                     /codon_start=1
                     /product="hypothetical protein"
                     /label=hypothetical protein
                     /db_xref="SEED:fig|6666666.356832.peg.100"
                     /translation="MNTAYTTAANKAVAHERAYEFHNAGMMWLAAQRYASGKNIEHCEL
                     RAEFCQKFGKYLERDND"
     CDS             52596..52787
                     /codon_start=1
                     /product="hypothetical protein"
                     /label=hypothetical protein
                     /db_xref="SEED:fig|6666666.356832.peg.101"
                     /translation="MTEIIDQANELVEMTIQHAINSRPAPLPFTGKCRNCDEKISVGSF
                     CDADCRNDFELRRKNERK"
     CDS             52774..53757
                     /codon_start=1
                     /product="hypothetical protein"
                     /label=hypothetical protein
                     /db_xref="SEED:fig|6666666.356832.peg.102"
                     /translation="MNANNETACLIEKIKSHLEIQDDSIKNGKIANWQYMYQRYTAPVV
                     LHQIIEYIESVESQLTALRQAQQEPVAYMCDDDAGREYNGHNQFSCGRRGIPLYIHPTA
                     VPSVNEQEPAAFRWRHRADGEFPASKWEYLPADLADRFIERVVSKDRDVECEYVYTAPV
                     ITDSAPIITDSERQSAIAALLAHPDSYFGEMACRQIADCLRQLETAEGQRAGAFIACNR
                     WHDMFREAEKQLAELQGIPTPPAPAVPDELKELADNINERLRNGGLSGRETEKLEYAWA
                     LVETARADRDNACRAAMIKQSTNTCQLSGNSEQLGNAGIKSNVEGE"
     CDS             53934..54098
                     /codon_start=1
                     /product="hypothetical protein"
                     /label=hypothetical protein
                     /db_xref="SEED:fig|6666666.356832.peg.103"
                     /translation="MGYSRSVIRLSKLGETFRCPKCVNGRTFEGSENPDETVECKHCVS
                     GIRIDNGKN"
     CDS             54100..55053
                     /codon_start=1
                     /product="hypothetical protein"
                     /label=hypothetical protein
                     /db_xref="SEED:fig|6666666.356832.peg.104"
                     /translation="MKDKDIQSRIDAAVELLKQAAPQMLAVKGPDGALVGPLKATEQLS
                     AAEPVNKRDEFPAILPCDVELKPGLRIGKGCPISTLHLALKRRAEYLAMREYIKPAEHE
                     AGVAAMRNFIRDCAPTTGKPLKDLEPDEIVELFGRKFRVDCRHDYHGRGETRFDFRRAE
                     DGLSPICVTIGIDNDLGLVVSNHPGLPDGWKIVPVEPTEAMLLVLGMSGSLESMIARYH
                     KMLAAAPLPDHSAKKVGADQFPDFTKMGNGLLPCPFCGSGDVEAFAQDKDDCPNMSAIV
                     RCHNCNAQSAQMVGKNKISMASNSWNRRASEVNRGK"
     CDS             55043..55900
                     /codon_start=1
                     /product="Phage protein"
                     /label=Phage protein
                     /db_xref="SEED:fig|6666666.356832.peg.105"
                     /translation="MENKMSAGRADQYRAEALAVRKALGFSPDAEDVSPSDLVAVINNL
                     RINATWTDEQCVEFLSVAFRHCEIKGDVVFDEIRQGVQFALAAAPQPDQLRDNVPDATK
                     MVPVDTPAKDLIERCKQVVDNAVQNSGLTYGMSRIADYHHVALSALNSSGIANTTEIST
                     DDSEHLLELVEIPVERDGNGYWSHHVWSALFGDREGMPLDELKATLAAKNLECTYVELE
                     LDHSAKAEAVAYHYFENGDTDISEWNPMRPEGDGWFIVSIHETDEGPVCYWVRPIPQSE
                     GGEA"
     CDS             55897..56232
                     /codon_start=1
                     /product="hypothetical protein"
                     /label=hypothetical protein
                     /db_xref="SEED:fig|6666666.356832.peg.106"
                     /translation="MSDEFLRRINQLEDELGNCTTTEVELVSYVKNRETGTSEARYYVR
                     HSNQTTVLEQGLVISRDQFGYYKADLVITDFPKLGSAEEAALKLAAWLKRMGEAIESSF
                     NREGGEA"
     CDS             56314..56562
                     /codon_start=1
                     /product="hypothetical protein"
                     /label=hypothetical protein
                     /db_xref="SEED:fig|6666666.356832.peg.107"
                     /translation="MKSADDWLNECIESEHGIFKKRKDALDLSIGRENFIRHIFRSIQS
                     TVEVCVPQPILNESAHSYRKRVIDEIHRAGGTVATLK"
     CDS             56795..57958
                     /codon_start=1
                     /product="Phage integrase"
                     /label=Phage integrase
                     /db_xref="SEED:fig|6666666.356832.peg.108"
                     /translation="MSIKQRNGVWHCDFTTPDGKRVRQSLGTEDKREAQELHDKLKADS
                     WRSAKLGEAPVKLFDEACIRWLREKSHKRSLDADKSKITFFLDHFHGRELSTITNDHIQ
                     VAISKAYDRKHRERWEEMRDRLKREGKSVPAYSPKPISESTKYSFQAFMRALLRIAANE
                     WGWLNSVPVVKARQPRNKRIRWLTHDEARQLIDCLPDHLKSVVTFALATGLRRSNILDL
                     EWSQVDMQRKMAWIHPENAKGGKAIGVALNDTACGVLRGQIGKHHRWVFVHEISTTKPN
                     GEKTPEIRKLRVDGNKAWNAALKRAGIENFRFHDLRHTWASWLVQSGVPLSALQEMGGW
                     ESIEMVRRYAHLSPNHLTQHAKQIDSIFAKNGKNTAQGIIGEIKNAM"
     tRNA            complement(57979..58051)
                     /product="tRNA-Lys-CTT"
                     /note="/transl_table=11"
                     /db_xref="SEED:fig|6666666.356832.rna.1"
     CDS             complement(58109..58261)
                     /codon_start=1
                     /product="hypothetical protein"
                     /label=hypothetical protein
                     /db_xref="SEED:fig|6666666.356832.peg.109"
                     /translation="MMRCSASPVSQEQTFPSEDEYVLILTIGILLRPEGKIVIGYKMFE
                     EYSDF"
     CDS             58376..59785
                     /codon_start=1
                     /product="D-serine/D-alanine/glycine transporter"
                     /label=D-serine/D-alanine/glycine transporter
                     /db_xref="SEED:fig|6666666.356832.peg.110"
                     /db_xref="GO:0006810"
                     /db_xref="GO:0016020"
                     /translation="MTEQTHHAPGTTGHSDLRRNLTNRHIQLIAIGGAIGTGLFMGSGK
                     TISLAGPSIIFVYMIIGFMLFFVMRAMGELLLSDLNYKSFSDFAADLLGPWAGFFTGWT
                     YWFCWVVTGIADVVAISAYAQFWFPELSQWLSSLLCVLLLLTLNLATVKLFGEMEFWFA
                     MIKIVAIVTLIIIGVGLVIMNFTSPSGAVASVTNLWQDGGLFPKGLSGFFAGFQIAVFA
                     FVGIELVGTTAAETKNPTVVLPRAINAIPIRIIMFYVFALMMIMSVTPWSHIAADRSPF
                     VEMFVLVGFPAAASVINFVVLTSAASSANSGVFSTSRMLFGLARQGDAPARFGKLSKRA
                     VPSAGLLFSCLCLLSGVVLIYLIPNVMTVFTLVTTVSAILFMFVWSIILCSYLVYRKHR
                     PQLHQASSYKMPWGIMMSWACLAFFAFVLILLTLQPDTLQALIVTPMWFVVLAITYFFI
                     RRGRANADSQA"
     CDS             complement(59868..60143)
                     /codon_start=1
                     /product="Nitrogen assimilation regulatory protein Nac"
                     /label=Nitrogen assimilation regulatory protein Nac
                     /db_xref="SEED:fig|6666666.356832.peg.111"
                     /translation="MNLRRLKYFVKIVDIGSLTQAAEMLHIAQPALSQQVATLESEMEK
                     QLLVRSRRGVTPTEAGKILYSHAQTILNQCEQAKNAVNGVRQTVSV"
     CDS             60311..60625
                     /codon_start=1
                     /product="hypothetical protein"
                     /label=hypothetical protein
                     /db_xref="SEED:fig|6666666.356832.peg.112"
                     /translation="MSALSHVAPNWCGNCYLKVHALVNHSSSGAKNTNHLSNFNNLIIS
                     SSNSYTLRHHALTSNQAIAIIHTTSDSSVVQSVERRTVNPYVTGSSPVRGANLKKADVH
                     "
     tRNA            60524..60596
                     /product="tRNA-Asn-GTT"
                     /note="/transl_table=11"
                     /db_xref="SEED:fig|6666666.356832.rna.2"
     CDS             60779..62056
                     /codon_start=1
                     /product="Integrase"
                     /label=Integrase
                     /db_xref="SEED:fig|6666666.356832.peg.113"
                     /translation="MSLTDTKVKNAKPSEKAVKLTDGFGLYLLVHPNGSKYWQLGYRFE
                     GKQKVFSIGVYPAVSLADARQRRDEAKKLLAAGVDPSAKKQADNKTIQERRNNTRAFKT
                     VAKSWFATKTTWSEDYQRSVWTRIETYLFPDIGNKDIAELDTGDLLVPIKKIEKLGYLE
                     IAMRVKQYATAIMRYAVQQKMIRFNPAYDLEGAVQKPQTEHRPAIELEEIPTLLERIEG
                     YQGRSRLTLLAIKLTLLIFIRSSELRFARWSEIDFKSGLWVIPEQREAIEGIKHSGRGA
                     KMRRKHYVPLCHQALAILEELKGLTYDVNGDDGFILTGCYDAMKPMSENTINKALRKMG
                     YDTKTDLCGHGFRTLACSALIESGIWPEDVVELQMSHMEKNNVRAAYTHKAKHLEQRRL
                     MLQWWADFLDANRNGMVRPFEFAQKG"
     CDS             62091..62204
                     /codon_start=1
                     /product="hypothetical protein"
                     /label=hypothetical protein
                     /db_xref="SEED:fig|6666666.356832.peg.114"
                     /translation="MRLNKSRAIGYHGDIGSIVWIVRFTDLMVAVIVNASL"
     CDS             complement(62304..62795)
                     /codon_start=1
                     /product="hypothetical protein"
                     /label=hypothetical protein
                     /db_xref="SEED:fig|6666666.356832.peg.115"
                     /translation="MNRHNNKLMEIPADYVFHENHNILHPVNNTEHWGEVKITSKQFNQ
                     LGGKIFLRAGKHIGPHKGFGVRHIWSERGSKLIQWGFPTIHDVPRFVSEIIVHQAGIVC
                     EFSEMGGYHRVVVLRGRKGCAVLAAFDSPNDEGSLIYSVVTAYRNINPNGTLVAQVSVL
                     "
     CDS             63098..63307
                     /codon_start=1
                     /product="hypothetical protein"
                     /label=hypothetical protein
                     /db_xref="SEED:fig|6666666.356832.peg.116"
                     /translation="MDERYIIIPHKTNLSYRFDGNEEVTIELEMHLIFDTVNQRVITVC
                     NSLEEAQIKIEELKRQVSSRPRMK"
     CDS             complement(63282..63710)
                     /codon_start=1
                     /product="hypothetical protein"
                     /label=hypothetical protein
                     /db_xref="SEED:fig|6666666.356832.peg.117"
                     /translation="MKILINVQNNWPDNVKELDSAKYDQNKIPWCGKELFFLHKDGKVY
                     QRYVKMPFIVDVEEFSLFSLTMKDDNSFLIEKITDWPEGVNIRKGFFREEWGHKSNGCC
                     WYVFPDGSNMYAYFDAPLIKEHHRIYNVMPFISYEVLS"
ORIGIN
        1 tcaattaatt tcccaaaaat aacaattaaa tcagttttga aatcaaatgg caggaattgt
       61 ttgatgaaac ttgctttagg caattaaaag aagtgttggt gggtcgtata gggctcgaac
      121 ctatgaccaa ttgattaaga gtccatagat agtccaatta acctatctaa tatcaacaag
      181 ttacctgcat tcacaccgca tttttacgtt gtagatcgtc acaatgcgac aaaaagcgcc
      241 gctctacgtc acaatgacgg cacgcgcatg atcagtctac aggctcctga tatccgcatt
      301 catcacagta ccaccattgc cggttgtact cgacgatctg ccgcatttca ctgccgcaaa
      361 ttgggcagaa tttatagttg tcatcccgtg ctaatttagt ctcagttgct tccgtttttt
      421 tgttatcagc catgttttaa ttccctcact gttgttttgc cgcggcaaca tcggatacat
      481 atttgttttt gcgatcggct atgcgattac gcacaattgt ttgttttgtc gcctcctgtg
      541 gcccgtcagc aacaattgct gcaagatacg cctgatttaa gtcgttcatg tcgtttttgt
      601 attctgtggc caacacagct aacgtggcag aaacggcatc ggcacgttgc gccgcggtat
      661 tcgtaaccca tgcattacca tcccactcgt catattgagt ttccggaatt aataaagtca
      721 gatttgacgg caattcacca agcgtgctaa ccacctgcgg ttgacgtgtt tgcgtgtcat
      781 atgcagtttg accacgatag tcagtaacga tttcccatgt taaatgatcg aggctacgca
      841 cgatggctgt tccggattgt gaaataggtg gagcatctgt gtagctattt gctgggatgc
      901 cagtcccggt catcaaaaat tcctccccgc taccaacata ctcaccagtc acgctatttg
      961 cgtgataaat cacaatccag ccgtcactga ctgcgaatcc atgctcatcg agcgtggtat
     1021 attgtttatc tgtcatgctg ctctcactat gtagttgaat gcgacgttgc gcgggcggtt
     1081 ttccgatgca gtaggaacga ctgcactagc tcggaaatat ttgtagtaaa aaccattagg
     1141 gccagacgcg gcagaaaatg gcgcagatgt gcctgtgtca gttacaaacg cgccagacgt
     1201 catcccgata ttgtacccaa ccatcgaacc agtaatatcc ctgatcgcgt ccccctgtga
     1261 cgttccaatc ccccgccccg catccacccc ccgcccatca tcccagccgc gaataaattc
     1321 gccgcgcaga tccggcagta caccgccggg gtagacttgt gccagtttcg gatatgttga
     1381 tgtgttgaat gattgtccgt tgcatttcag ccagccagat ggcgctgtgg actgcggcca
     1441 cggtaacggt atgccgacta tttcagaaac ggaaatggcc ccaatgtccg ccggcaacgg
     1501 cttaaatgcg gtggtgtaaa tctgttccca cgggttcgga aaaccagagt ttccaattga
     1561 cgatctgtag ctcaacccgc ggttgccaaa aagtgcttga aattgcagag ctgtgcaact
     1621 ggccgacgat ccgtgaaagt gcaccaccat ctctgatgcg ccatctacat cagcacgata
     1681 tacgccgctc ttagcgtccc atggaacatt aaatccggaa acggcaccag taaagtccaa
     1741 tccgaacgag ctattatgaa caaactcggt ggtggcgatt tgcgtagtgc tggttgccga
     1801 tgatgcggtt ggcgccgttg gcgtcccagt taacgcagga ctggcgagcg gggcggctga
     1861 caaatatgac aacacattgg caatcgatgc ctggccgatt atgtctcgac cgactgaggt
     1921 aatatcggcc tgtgccagca catcaacgcc agtgaaatac ggcaatttat ttgcaccacc
     1981 ggaaagcccc gcaaatgctg ttaatgtcga atcccttggt tgataagccg cagttaaatt
     2041 aaaccatcca gttgatactg agtttgggtt attggtattt gcgtcagtag tgctgacata
     2101 aatagatgtt ccgtcatcac cgaggattac cgcacctttg ggataacccg ctatagcggc
     2161 agaaaatgtt gcgtcatatg aatttaatgc gccagcgctg aaccatctac ttagatttga
     2221 taattcatat agaatctggt tcatgtcctg cccttttggg ggtaggccac cagccgcttt
     2281 cagtatcatc gttactggcg gaaatccagc atcatatgat gccgtgttat ctccggctgg
     2341 agtcgtgctt aatatgtttt ctcgctgccc gttaacgccg aacggcacgg gttgtttctt
     2401 gggtgcatca gagcgattca taattaacct ttataaaatg ttccatcgtt gaatgggtat
     2461 gcatcatcag caaatccaaa atacggaggg gcaatttgtg aaatatttaa ctgaacacca
     2521 cttggcaccg gaaccacatt ataatccgtc aggattgatt tttcatatgg tgccaatgca
     2581 aattcgaatg ttatgccgat cgtcatatct cgataattga cgcaatacgc acgtccacga
     2641 ccagcaaata acataaccag aaatttgttt atctccggta ttgtagcaat gctaatatta
     2701 gaaaacgcct tgcacattat tagtgtgcga taggcatcat cagacagtct gactgatgtg
     2761 gtttcctgaa cacctgcata aaatggtgaa tcattaaatg gtagtggata atctgatgcc
     2821 cccgcattgg actcatagaa tccaaacgca tcactatcga ttggcgcagt tatatacctg
     2881 cctattccta ctatttttcc ccacacgtct aatccataag actcattagc agtcaaatcc
     2941 cacactttat tgataaattc attggtaaac tcatcaatac tcacggcctg attaaatgtg
     3001 ttgatgatag ataacaatgc agtactgttt gcgtactgcg cgtatattgt cgattcccaa
     3061 ttattcatac aagatttacc gtaatgtcag aatcctgaat tgttggtatc tgatcaatcc
     3121 ccattgtaac cgagggtgca tacgatgacc cggtcagaga tatttcaatt gataacacgc
     3181 taaccgtgtc gggcgatatg gatatcaccg gagcatagta tttaccggcg ttaatcgatg
     3241 cgccgattcg tgcctttcct attccctcat accctccggt aaaaacagtg gttaccatgt
     3301 tttttaccag ttgcgtaatg ttgctaggag ggtttagtgt gctatcaata ttgacagtaa
     3361 aatacactcg cgttggcgag gctttttgcc attgcatcac atattcagga tatggagttc
     3421 catagtttgt gctgtcataa acagtatatg tagtattgcc attcatgtca gcgccggggt
     3481 tgtaggtttt gaatatagca ttagctacat cactatcaga ccccccataa gcgcaaatat
     3541 aaatagaatg ccccaataca tgaaaatttg ttgtcccttt attcactacg ctggcggttc
     3601 tgtttgacca cacataggca tcaaggacgc cattcacctc aagcacggca gataatacag
     3661 ctccatccat atttcttgcg tttctcgcca cagattcctt tcggcgatat tcaaaattag
     3721 ctcttgattc ctcaagactg ccaagcacac cagcagaatt gttaataacg ccagaccatc
     3781 cggggactgc ctgataaatc gcagttagcg caccaatcgg gcaggcaatc gcaccagcgg
     3841 tttggttttg gaaaatcacc gacacggtgc catcagatga tattgttgcc gccgatgttg
     3901 atgcataaat gtagccgtta acatcctgag ccagactccc ggcaggaata atagtaccga
     3961 ccagccctga gcatgtagca gttaccgccg ttccggtggc ggcgattcgc tccatgaaat
     4021 aaacgcgacc aatagcgtcc tgaaatcgcc cggatgcata gtcaggattg atttgattta
     4081 ctattgccag tagctgatcg tttttatcag caatgattgc cgaatctgat acggatattt
     4141 gcccttgcgg ggttgataaa tcctgactca ttgcgctacc gagcgcagta gaaaagtccg
     4201 tgatgcgacc cgataaaata tctgcctcat ctggaacagc taacccggat gttgaaaatg
     4261 acactgacgg gacggaggtt tctattgtcg ttgttgccat attcactcac atatttactg
     4321 ttgatgtggt tccgttcgtg tccacaatag ttattacgcc atatgattgg cgcttctgtt
     4381 gatcatttat gattgtggct tgtgctgttg atacataatc cagcctcata gcctcattct
     4441 gcaaataaga ttgaataaga ccggaacccg gaataaatcc cataatttgg gtattgtacg
     4501 ggatgcctat tgtgttgtca tatacacact caccgagata taaactacag gctgtagcca
     4561 catcctgtgc gacggaatag ggattgttta caacggcgag gttaccagaa tcatccagct
     4621 gaatatccca cgtatcagaa ttgagtgata atgtcctgtt ttgcatttgc taccctcctg
     4681 aatgcatagg tgtcgattcc atctctacct agctctgttt ctgttttgca gtgatcgacg
     4741 cattcaaacc cgttttccaa aaaccatttt cgtaaaccta cgtcagtgaa ataccaaatg
     4801 tgttcgtctt tcctgaaatg tcgagatttt aaaatatgct cagcattatc aaaaataggg
     4861 atggatacga aaacccactc tgtagcctga gatatggcct gttctgggtt gtctatatgc
     4921 tccagcacat cccaaaatgt tagcgcggaa gccttttcat tgtagatatc atgaaatttc
     4981 ccgtttttat gcagccattc tacaccagct ggattaacgt caaacccctt agcgttttcg
     5041 cactttgata caaactgacc gcacccaatc cccacatcga caacatcacc ggcgtggtac
     5101 ttttttacaa aattgatgcg gaattttgtt aactctcgtc ccatttcagt gcttgccatt
     5161 gatgcatatt ttgagaaata accttcatca tatggcctgt tttttggtac agggtagtga
     5221 cctattccca gctcagggaa aaatgacaat tcactattaa tgagttcaca aatttttttc
     5281 atttaaccat ccggttattt tctctgtcag gtttgaaatt cttttatcgc aattgtgttt
     5341 catctcctga cacatgcagt aattgtcagg gtatacaaac aagcattgac tcaaatccat
     5401 aatagatgca tctgttatgc gcgagtgatg attactacca ccacaaccac caccaataaa
     5461 aatcattttg gtgcgatatg ctaacgccgc ttgagatatg aggcatgggc ccgtcacgac
     5521 aatatcagcg tggtttacca gtgccattaa ctcggtgatt ttcaattcac cattatgcaa
     5581 tttcagatcg gcatatggtt ctaaatctgg tatccactcc gcgcccggaa ctgtatccgc
     5641 cacactgacg caaaaatagc cgcgtctgtg cagtaatttc gcggcggcat cgatattttt
     5701 attcaatggc ccacgcgatt tgtgatgcca ttctgaccgc tctgttgtgg gtcggattaa
     5761 cgctattttt ctacctttcg gcaatccgat gtcaggcagc gcgaattttg gtaaatcgaa
     5821 cccatcaggc tcgcagccaa aaacgcgtct ggcggctgaa aatatcccac cgggccgcat
     5881 caggtcagca ttgccataga atattcttct cgactccatc tgaactggag ggagttgaac
     5941 atatctgata gttgatgatt gctcattttt acgctgagtg cgcaatgtgg tatctgagcg
     6001 gatgaaattg acgttcggca gatcggaata aaattcaggg atggaggttt ttaggtaaat
     6061 ctctcgcgtt tggcataacc gcttgataaa cgctcgctga aatatgttgt cccctatccc
     6121 ctgcataccg tcgatgtaga gtttttgcat aacgataatt gttcctcaaa attcccggtc
     6181 gggaaggcat tcagttctgt atgtcgggag cagttgatca ccttggtttt tcccatgcga
     6241 gcagatgcac gcaggaaatc atcgtgccag cgccgcacaa ggtttatatc ggggttttgt
     6301 aacactccag agtgatcgct atgccagtgc ataccgttgg atagcgaaca gtcataaccg
     6361 atcagtagaa tgcgcgtcgc gccaaggtgc tttgctagca agatggcccg ttgcccggaa
     6421 ttaaagccgc cttgtagttc tggcgggaat agccgcaagc caaacaatgc cgaagtggtt
     6481 tcgtttgaag cccaccgcat agcatctgaa cgtatgattt tgtggttttg ctcccaccat
     6541 tcatggtcac cggcataaat atggtggcac tctggtatca atgaccatga gttgttaact
     6601 gcaataattt ggcagccaga ggccgccgca agtcggcagt cattggctgt tagcgatggc
     6661 ccggaggcaa tgcatataaa gttcataggc aataaaaaac ccgccggagc gggttgggtg
     6721 tgatgatgtc gcgagtaagc tcaaggctga tttacgccgc cacgttgctg caatatatcg
     6781 gagatcgaca tgtcagatgg atggcaaagt tcacgtgaat cataagtccg cgaccagtaa
     6841 gcaagccaat cttccaattc tctacaggtg tacgtcttgc aggccagccc ctcagccata
     6901 gtgacaatgt catcacccgg tgccgtcagc tcgtagccat tgattagcaa aaatatataa
     6961 ccacccatca tagccgtacg cttgttggcg ttcgcaaacg ggtgattttg tatcaggctt
     7021 tcaataagag ccgcggccaa gacaaacatg tcatctgttt gctgataata tctcgtcagg
     7081 cttggtctgg attgcgatga actgagattg tttggattga gaacgcaaac aggctcggat
     7141 ggtgtttgcg cctcaatcaa acttttattg ataaaaatca gatcatcttc ggaaaggtaa
     7201 tgaactccat caataaactc ggccatgcgt gtgctttaca ccttagagag atcttccatc
     7261 gccttttcgt aacgagcaaa accaaaagca aaggcgttct ttacctgatc tgcgtgtgcg
     7321 cagtcgcttc ccattgccgc acgtggagat gccaccacgc ctttgtcacg cggggggatg
     7381 tacaaccgct cggactttct cagtgcgtga ctcataatat aaacctctgt aattactaac
     7441 aatattgtgt aatccattaa cataagacca ccagtgcgcg ccattcacta cagcccaatg
     7501 gttagaatga cctgtaatgc atctagtaat cttagggcta agtttatagt aaacaccgag
     7561 tcaagccatg gtttactttc acaggcaaac aaaaaaatca atagcgcata atcaaatccc
     7621 catttgtaca agggatttca ttaacctggc tcaatcatag ttagcaatcg gtctgacgcc
     7681 acacaaatga agtgcgtaga caaaaactcg cgttaggtaa agactgatcg cctgtacagg
     7741 gtttatttgt aatcaaccat caaaaggtgc ggttctcgtt tgcgttttac aaaaaaaata
     7801 tgattcttgc gttgcgcggt taaccatttt cggtcaagct ttgatttaac aagtaaaggt
     7861 tttgatttgc caaatccagt agctaatcta gtacgcgcaa aacgaaagga ctcccgatca
     7921 ttgtggggga catatgcaaa cagcagctaa gaatacaact atgccataca tgatcccgga
     7981 agcggacttc gacagaaagc tcagcgttat caaaaacaac atcgagcata ccagctcttt
     8041 tttgcaaaaa ggcatagagg atttctcgtt gccgggcttt gttgtgccat ttggctatcg
     8101 actggttaaa tctcgtgata acgaacacta ccgactgatt actgattcgc aagattcaga
     8161 aaccgtttac gccgttaaac tgctgtttcg gcatgacatc ataaacgcta aaaaaacatg
     8221 cacgcagata ttggtatggc gaaccattca ggcccagcat gacagtgccg tccgaggtct
     8281 tccccaagtt ttctttgagt tttttttaga aagctactcg attgtcgtat ctgatgaaga
     8341 gcaaactcct gatggacgcc gcttttggga acgaatgatt tcgtgggcca tgtctgcaac
     8401 tggatatcat gtatatgtat cagatggcac gcaagaatcg cgtccgttga catttatgac
     8461 atcatgggac gacttctata ctacgtggtc tgaattctgc tggggtcatg acaaagagtg
     8521 tcatcgccac aggctgctag tgatcagcaa agacaagctg cactaatcac caaactaaac
     8581 ccggcttgcc gggtttatta ttgtcattca aataaccttg ttgacgccca gatcactatc
     8641 agctacattc tgtgtcacga ggcgtagaaa cctctccaaa agcggtccta accaaccccg
     8701 atagcgttgg attttttatg cctgtcattc agtgggcgca gtgcgcgacc acaccccgaa
     8761 taatgtcggg agggcaacga atacaacacc cagcaatggg gaataagttc gcggtatctt
     8821 ttgggccgtt tctaacctcc cgacaccaca ccatctgtgg taattgacaa tctaattaat
     8881 ttcagaatat agttccgtca ggtgctcaaa acaccacaaa cagcggatac cgcacccgat
     8941 agacttgcgg attttttgtg cctgaatttt ggatatatgg ccgggcgtgc ggctaataca
     9001 acacccgaaa ggggaatatg cccgccgact gtttgcggtt ttgagcgccc ggccacccta
     9061 cgcaacgccg gttattgccc atcacattaa tcctattgtt ttggcgtttg ctgcttctca
     9121 attaacaact ttaacccttc tagtgatcta gcaatctcag taagactacc cgcaggatta
     9181 gtggtaaacg cggcctcaac ccacgcctct aaggcggcaa caatttcagc gtttatggat
     9241 ctcttattcc tttctgcaag agccgccacc ttctctttta attccggatg gattctgacg
     9301 ttgaactgtg gatttctagg tgctgacata aaaattacct tgctcaaata ttgagttgac
     9361 atgatagccc acggatacta acatttcaac attggtagcc actggctact aacacgacga
     9421 agccccaact acttgcgata gctggggcct ctaatttgcc agtaacctgt gagaaaccga
     9481 catgaagagt atggcaaaag taaatgctga tatcaccatt tttaagtttg acgatagaga
     9541 tattcgcgtt gtgatgaaaa aaggtgatcc ttggtttgtt gccgcggatt tatgtgacgc
     9601 cttgaatctg actaactccc gcgtttcgct tatggctctg gatgatgatg aaaaggatgt
     9661 aagtttaatt tacacccgtg gaggtcggca gataatgtct gttgttagtg agtctggcat
     9721 gtacacactg attcttcgct gtcgtgatgc tgttaaaccc ggaaccgttc cgtatcgcgt
     9781 tagaaaatgg gtcactgctg atgttttacc atcaatccgt gaaactggga aatacactaa
     9841 aaattacgaa gatatcgaaa agactactgt tgatgaccgc accccgctgc gcagcttagt
     9901 aaaccggatt atgggtaagt acggcatccc atatcagccc atctacaaaa tgatccaccg
     9961 agaatttggc gttaaccata tcgatgagct ttcgccaaaa caggcagcag aagcgatgga
    10021 ctatttggcc gcaaaggtca tagagggtga attcctcggc aagcaatctc taccagcaac
    10081 acctccatca ccagcgctta ccgtgcagga aatgaatcgt ctggtgtggc tatgggatta
    10141 cgccaaccgc tcacaggcca ttttcaggga gctaatgcca gtcatgcagc aattgcaatc
    10201 ctcgtatcat ggggtgtgct gcgattacgg atatgagttc tcagcaatcc tgtcactatc
    10261 gcgtgacgct gtgctgaagc tgaccagtgg cgtagatgtt caggcgccca gcgactcaat
    10321 aaacatatca gcatggatca ggctaaagaa taacgagcta ccggcaagac tgcgttaact
    10381 tggaattact cacagaccac gctgcgcagg gacgcgcaac aaaaaaccga tggtcgggct
    10441 atagatatta aaagtttatt atgctgcctt tgctttcatt tcttctattt ttgccagcat
    10501 tctttcaacc acagctatag aagtgatggc ctctgatgca ctaatcgttt cgtcaagctt
    10561 gtaatcagcc cgttttcttt gcattttttg ctgcttcaaa acagcgccaa gttgaactaa
    10621 tgcaatgaac tcaaacggct cattttttct cctggcatct ttggtgaggt attcaacaac
    10681 accatcatgt gtagttggag ggcaatgggt aagtattccg caagtttcat ggtaaaaggc
    10741 ataataagca cgagaaatcg cgcttctcaa tccagattcg gttccagaat ccaagcagga
    10801 ttttgcggca gagacaaaat ctttcccttt tatgctcatg atgctgaaat ctccgtttct
    10861 atgtttcctc gataccaagc tgtaagattt ttgcttgcaa aagaatcatt tgttgccagc
    10921 gcaattgcaa tgtctatatc catgttagcc agcttctccg catcatcgca aagaacattg
    10981 cagatgatcg cagcatctcc atcatcacta gtgtagtaat catgtgatgt tgctaatgcg
    11041 ttgtgatttt ttgcgatggt tgaggcaata agcgaaagag attttagctc agacggataa
    11101 aggcttgtaa cctctataaa atcttctaat tgctttttct tatttaaaac atccatttgc
    11161 atttcattgc gctcattatc atcacttatc atggatatgg ccttccttgc aaaaaataat
    11221 gtaagctcgc catcgccatc agcatacgcg gcgtttcttg ccgtaatgca tagattaaag
    11281 ctgtttattt cacggccaag ccttaccgct tcattttgat aatcctcaaa atgaccagta
    11341 tgcccaagat aagtaagata attctgtgct gagatctcgt cacgatatga tgctgcttct
    11401 ttgaaaaatg aaaccgcctt ttcgtgttgt gctgcagctc cgtaagccaa agccgatatc
    11461 atcagctttg ttggctcatc ttgaatcttt tcaacatctg atagaacgcg cttaagagta
    11521 aaagcgtcca gaatgctacc ggtctctatg tgagagatta gcattatcgt agtgtcacga
    11581 aatccttttt tttgtgtctg agccatttaa cccctcccta ttccacaaac ttagcattag
    11641 gaaggggaac caacaacctg ttgttttatt catgattgct gccaaccaat gatttcccca
    11701 catgattact caatactgca tcagtaacag tattggtgcg gtctcgatgt ctgccgatgt
    11761 taaaccctga gtgacttttt ccagtcatat ttcaattgtt gcaggttcca gcacgactta
    11821 gctatatcaa caatcgcaat gcgcgagtta gggtcaagcc ccggcgcgtc ttgcaatctc
    11881 gttacgactt catctagcgg aacgccaatt gactgttgcc ctgcggcacg ctcgcatatc
    11941 gtgcgcactg cataatctat gtcagattgc tgatagggat ttgatgacag caggtattga
    12001 tagcgcatct gcaactgctg gctgtatttt gtaatggatc ggttgtccat gcactccttg
    12061 cttgcctgac agtctttctc ttttttgtcg gcagcttgtt tttctttttc atcaaattca
    12121 cggatgccgt tatcaaacgc ggacagataa gcggtgtggt aacaattctt atccgtcccg
    12181 cacttgctgg tatcagctgt caaattgctg cccgtatgag aaagataatc ttgtttcagc
    12241 tctttaaccg atttatacca tgtccttccg tgaccattgg gccaaaattc ttttactggc
    12301 tcatacgttt ccgattcagt cctttgatac tcttttattt gctccggcgt cattgcgcat
    12361 ccagcggcag acaatgcaag taacagcacg atttttttat tcattattgc ggccctgagg
    12421 ttagcgatcc ccccgattgt acgccgccat gagcatgatt ttccactgat atattacccg
    12481 ccctaatgtc tcccgcggcg gtaattgtgc tggttgttgt caccgggcct ataatgtgca
    12541 ttccattagg agccatgata gtgataccac catcagcgaa ttcgatatac tgcgtgggtg
    12601 tagggttcag taacccgatt ccgccgaggt ataccgcgtc agcaaggttg tgctctcttt
    12661 tgctgccggg gatggcttgc gccccactgc ttttaaccag actgatatcc cggtcacaga
    12721 ccaaaatcag cccaacatca cccacagacg gattcatgat taccgcgctt tgcccatgct
    12781 gtaaccgcat aaacggaacg ttgtaaatca ggtctgtatc gttgattttt ttaccggacg
    12841 catcaacagg attaacaaac cgccttaccg tcagggtcga gcctgtaata gcggtcacct
    12901 gagccaattc gacaaatgag catcttgata gcatttgccg aaacacgaac gccagcgaat
    12961 tgccctcaca cgatatatct gccggggttt gattgatcgg attcattgca cccactccgt
    13021 aggcgtcgca gttatcacag aaaaccacgg gccaccttca atttgagacg ataggtaatg
    13081 tgacgtaccc acctgaatga gataatcccc actaacgtgt ggtaaatcgc tctctatgcg
    13141 aattttgcgg cacaccttaa ttaacggcga atacagacag gtgactgata tccccaattc
    13201 agtaaatatg ggataaccaa tcatgccgtg gtcagcagaa atcaatacga ctttgtcatc
    13261 aatcggattt ttgccggtat aaatggttac cttgccaacg tcaatatcag cattaaaacc
    13321 atatgcacgg gcaatgcttt gtatctggtc tatagcgctg ccatcaaaac gctgattatc
    13381 aacagcaaca tcaacgtcag cgttgtaaaa cgaaaatcca gctgccccgg ctatgccttt
    13441 tattaaatcc tgagccgtgg tcttcccggc cactgacgtg gccgggaatg gtattgtccg
    13501 ttcatacgcc gtggcctgcg cgataatttc tatcggagct tctggcatca tgttagcatt
    13561 aatcattgga ctggtgattg agccggaaaa aatacgctcg tcattggcga taatttcaat
    13621 ctggttttgt ttctgagcga taatccggcg cgttcttgat gtcaacttgg ctatgatatc
    13681 catcgacagt ccgtaaatac gcgcattggc tacggtgccg gtagcgccac cgtatgccga
    13741 cacactcacc tcacacttga aaccctttag cgtgatagtg tcattttctt ttttatcatc
    13801 gaacgaaccc tctgacagtt tgaattttat ttcaatgtcg cggcgttcgt atgtcataaa
    13861 tcagatgcct ctaaatagta gagtttgtat cgactaccaa ggccatccca taccgggtcg
    13921 gtatcacctt ccatatcaga aaaaaccaga tcgccgataa aaccgaggta tttatatctc
    13981 accattcgat tgcaattcag gcatataacg ccttgcatta ttgctttttc accaacgtag
    14041 agatccatat aaaggccggt agttctttgg tgtattttta ttcggcaaga ttgaccgcct
    14101 agtgtaatgc ttatttcttg tgatttttcc gccgcaatag caatactcaa cattataaaa
    14161 tctccttaac aaacctagaa acatagtctt ttatctgttc ggcattagca ttggtggctt
    14221 cgtcatatgc ctcactaaca gtttcagcgg cagacacaac accggaaaca attgcgcttc
    14281 cggttgttga aagggctttg gcaaatgcag ttgcagagtt ggcagaggcc cacgcttttt
    14341 tagcttcatc taatgttaca ggtgtcgtat ttgatatagt tttgcttgtt gaaattgcac
    14401 cattccgggt tcccctttgg ttgtctgtct tttgttcttt ggttgttgag cttgatataa
    14461 ccacttcacc ggtttgcatg acggcctgaa ataccgcact gacttttagc agtgtctggc
    14521 catttttcgc ggtaaccgag taatcataat gagccaggtc atacgattca aaaacaccgt
    14581 ccggcgtttc gatattgtac gtgctcgcac tggtacgcat ttcatcaaga atatcaatga
    14641 ggtttgagcg gctcagcata ctgaaattgg tcaggttagg taatgccccg ctaaatgctg
    14701 accatccctc aagcaagaat tgaacgcgga tttctctcgg cttcttaact ttgttgtatg
    14761 aagtataaga gcctttttca attggtgaat tcacgattac agcatcggcg gattgctcaa
    14821 tagaacccca accgctagga gtaaaaacct tctgtccgac tacttttgtc ttgtcggtat
    14881 tattcttatc aatcgtgttg taataaatgc cataagtagg tgcaaatgcg ccattaatga
    14941 cagagaaaat acttctgctt ttaacagcgg ataacagggt tgtttcgtta agcgagaaag
    15001 acattacatc tcctgataaa tccataggta ataaacccgt ctaaacgggt ttggtgtgtt
    15061 cgattatttt gccactaaat cagtagtatg cgttaactgg catatttagc atttcaggaa
    15121 tgaaaatccc gaatttctta gccgttccgc gcacaatctc ctctggagtg tttgctcccc
    15181 cactgatagt ttcctcttgt ccggtgacaa tatctcggta atgaagagtg ataacgtagc
    15241 ggaatactgg aacaacttga cgcttttctt caatctgata acgaccagtt tttcgaatgg
    15301 atggtagtac ttcattggtc acccatttgc ggaagcgcca aggtaaggta ccttgtttta
    15361 ttgaatcacg gcagcggaga ataagagtgt acaggccgga ttcattgatg atgatcatgc
    15421 tctgcgctcc gttacctgcc gaccctaact tgaagttagg gtcgccgttg aagatttgtt
    15481 tttcatcatc gtccaacgat gctactgatt ttgaagggtt tgataggtct aaagacttac
    15541 aaacatcaga ggcaataaac cacggttctc catcgcgcat aaccgcgcgt atttcacttc
    15601 cttcaaaaat gaaacctgaa tttgcaactt cattggtgct ggatgtcgta ttttttgcta
    15661 aggtattcat atcaataatt ccatcacgat ttgttgatat cgaggcctcg ttagttgcag
    15721 ctatcgaggc ttcatttttg tagtcttcca cttctttcaa tccagaaaat ctcttgtatt
    15781 ttgttttccc atcgcttttc aggtgtcttt tgtaggattt agatgacatg ccaaggtctt
    15841 tttcaggcca tccggctgca atcctttgct ctagggtgca tggattaaca tcaaaaaact
    15901 cagcccattc aaaaattgtt tttatctctc cgctaatctc ataaaaaact cgaccgaacc
    15961 tttcctgttc tccccatccg tgccttttga accccatccg ctgccgtttg cggtcaatca
    16021 tgtctttagc gttgtctttg gcgtccccca agtacaagtg atctgggttg caacagcatg
    16081 ggttatcaca cgtatgaagc acccaccatt tgttagcacc ctgaggtatc acaccatttg
    16141 acatttcata agaaattcta tgggctgacc atactctccc ctcaaacgat aattgtccgt
    16201 atccggtgaa tccggtgaat ccagtccaaa ctaggcaacc atcatcgcga gcacttagct
    16261 tggatagaaa aaggcgccca agtgcctcct tatcaacaat atctgctatg gtcttccgaa
    16321 tcttcatata tcatcaccaa aagtatttta cagtatcgaa tagtcgtgac agaatcataa
    16381 tagattccat ttacagcctt agtcaatact ataaagaact atttatgacc aaagaaaacc
    16441 atttcataaa aagaatgatt gccagaaggg ttgatcaggg gctttcccaa gaagatctga
    16501 gcaagagatc tggggtggca gctgcacaaa tttctcgcta cgagctagga aaaagcaagc
    16561 caaggccaaa cgtaatcgct aggttagctg aggcgttgaa cgtgcccttt gagtggcttg
    16621 cttatggaga taatgatgct gacccaataa caattcccgg catacccacg cgccaaatag
    16681 aattacctga ggatttggtt aacataatca aaaagaaagc cgatgaaatg ggtattcctg
    16741 aatatgaact tatagaaaga atgctggctg aatcactcgt tcatgatgga gtgatagaaa
    16801 atgtagatga ctattacctc ttaaaaaaac cggatcgttg agtgctcgtg cggtatcaaa
    16861 aataggaact gcaatctttt tttccagctc ctgccagcgg tcaaccagtc tggcagtaaa
    16921 ctccggcgac aactgagcta ctactacgat gctgtctcgt ttgccttgct caccctcaaa
    16981 aagataagca tcaacaaacc ggtttgggct atttgattgt ttattttcaa ctttccccgt
    17041 tggggtaagt tgaatcacgc cacgatctac ttggtcactg attcaatgac cattgtcatc
    17101 ccctgagaaa actcgtctat gtattcaagc atcacagcat ttcgttccgc ttcgtagctc
    17161 tcgctatgtt ttcgtaactc tgcggtcatc cagttgaagg cgttgatata cgcctcttta
    17221 atcgcatcag ccttggcgcc attgaaaccc atgaccagca tcacgaagcc gctaaaatcc
    17281 attcggtagt atttctgttt cttgtcaaaa atacctaact cattgatttt atcgacagcg
    17341 caaaaatgcg ctctcctgaa ttcatcagaa aatagactgg cgcagggacg cgatacgcat
    17401 cacgcctata cccccggcaa atacatctgc acctcatcaa ccaccatttc cctcacggaa
    17461 tgaagcagcc gtttgcgtcc accaacaccc caactagcca tttttctggc gcactggctg
    17521 atctccttgg tttcagtatt gatgatgtga tcgattttat tcagacgcga catggcgctg
    17581 atgccattac ggattactgc ctgaaagatc tggtaaacct tgatttcaaa ctcaacattg
    17641 agccacgcgg cataacgaat ggcgaccaat tcaagacccc aaatacccgg ctgagtgcca
    17701 cctttgataa ctctaaccga agctattttc gtagctttgg tcagttcttg tacaaatttc
    17761 ttgatttgag cgcttttgat gaagttactt ggtcgttgtg attcagtggc ctttccctca
    17821 gccacggcgg cagcgtgcaa gtcattgaga ttgtagcgcc cggcgtcatc gacgcgaacg
    17881 gaaacgccgt ttacggatac ggttgggtat tgcatggcga ttaccttact ttgaaatgaa
    17941 cctttgccgc acaggaaatc agcccatcga aggctcgcca gcactagccg acttcctcaa
    18001 aggctcattt caaagggatt ggttcgatgt ggatgaatgc gcgtgcgaag cgctcgatga
    18061 attggctaat ttaatacgct gatcgtttat caggatttac caatcctgaa tgtgttgtta
    18121 tggtcaagcc ctatattttt tcacatagca aaaaggcgtc atcatgaacg acaaaaggat
    18181 tgtcgagtta gaaaaccaga atcgtgaact aaaaatacgg ctaagagcat tagagtacgc
    18241 cttcatgctg tctgttgttg atatgacgcc agatgggtgc aggcagatat cagatggatt
    18301 cggtcacctt cagagcgata tccttaaatc catgactgac gctgaagccc gtgaaaacgc
    18361 agccgtcaca aaacaattga aatttcttct tcggcatgtc ttcattcagg gtagtacacc
    18421 ctcccaatag catcattaaa ccttttagtt ccttcgtcaa agcttgttgc acaaaaagtg
    18481 ctctcagctc tacatgaaga tcgctttctt gcgcccaacc taagcgcaag ccagtaaagt
    18541 ttccttgcaa taaattctct catgatttcc tcgatattcc ccgccgaagc ggggcttagt
    18601 ttccggcagt aaaccccagc acgcgagagc gattacccgc ctgctgttgc aggtcttttg
    18661 acagcgccga ggcgctagtc ggatttgatg tgacggttac ctgaccaaaa ttatagacag
    18721 gggccgctga ttgctgcgtt atcggagatt gatatctcgg tgcagttgct gcggcgccag
    18781 tcggcatacc agccaatacc ttcggcacat acatttgagt ttccagcggt gcattgccca
    18841 accctttacg ctgcacattg ccaatccccc aattgtaagc tgccaatgct ttattgaggt
    18901 ctccgccagt ttgcgataac aactgattaa ggtattttgc agccgcctgc gcagatttgt
    18961 gcgggtcgaa cgagtcattg ccactcaatc ccaaatcacg cgcagtaccc ggcatcaact
    19021 gaaataatcc ctgagcacca gcgccagaaa cagcatattg attaccgcca gactcaacag
    19081 tagcgacact tttaagcagt ccagcaggaa gcccgtattt cgcctcaagt tgcccgaact
    19141 cgccagacat ccagtcaagc atggccttac ctttgccgga tgcctgtggt gcggtaacgc
    19201 cggggatgtt tggcgtcatt gacgcagccc cagccggggt gatgatggca tcgccaattt
    19261 tccccagcat gtcaagcgcc ttgctccaaa atgatttttc atcctgatgc tgccggtctt
    19321 gagccgaatt tccctgctgc tgagtgtcgt ttatctgctc taattgatgc tgtgattgtg
    19381 attccggata agcaatgccg gggttatttg cactccaatt tttgcgctta agtcgttcta
    19441 actcagacat ttcttccgtc tggctttgcg tgtcagacgg agccagcagc gacagtaatc
    19501 ccacacgctt agcgatggcc atgacgacgc cggaaccggc agcagcagcg ccagagccag
    19561 cggcggcacc agcaccaagc ttcagcaatg acccaaacgc gccgacaacc ccaagaaccc
    19621 aacttgctac tttcaatcca atcagaattt caaatgcatt tttccatcca cttaccgctt
    19681 caactccttt atgcacgtat gatgcgattt cgctgaacgt atccagcact gagcggatag
    19741 cggatttaat ttcctgcgga tgactggata accacgtcgc cagctcctgt aggtaattgg
    19801 tgaactgctg aacatacgga gatagtgcgt taaatatgac gtagccggtt ttttccagat
    19861 tttgatgtag ttctgtccac tgcacgttaa atttacgcgc ggtgtcgata tcctgatctg
    19921 ttatccccga tttagccgtg tacttctgca cattcggcat gaattcgcca cgctggattg
    19981 attgcagtgt ggcgtcatca atacccagca tttgcgcgat tgttctggcg cggtcttggt
    20041 ttttttcttt ctgcaatcca gatgcgattt tcgccatcgc ttgactggca ttgtcattgt
    20101 aatcaacggt aacgcccgtg ctggccgtga gcatcgccag tgcttctgac atcggcgttg
    20161 acttgccctg ccgcatcgcc tcaaggttgg tctgcaatcc acctagcgtg ccactcattt
    20221 tttcagcgga cgaacctgca gcctcggcag cttttcgcca tccatccagc tcctgagccg
    20281 acatgcgcag cgctttggat tgggtggata tctccatcaa tccatttgtg gtgtttttta
    20341 caaaactcgt gacgccggta gcagtaagtg aaagaccaac aagagccaaa agttctttct
    20401 gaatcagccc gaaaaacgat gacgctcgtt taccctgctg ctccatgaat tttgcagttt
    20461 gctctgaatt atcgcgggtg gatttcatgc cgtccgcgac atccttttta cccttattga
    20521 atccagatgc atccagacca aatgttacaa ccagcgcgtc aacaacagtt ggcattattg
    20581 ttcactccgt cgccgcgcta cttcggcgtt gtaattgtcg atagtgatta tttcaagcag
    20641 cgcccacaaa tcctctaatc cgtagacggt atccagctca tgcagcgtgg cccgatttgc
    20701 cgaaatgacc gtcgcaatag tccggggtat gttgacataa tcagccaacc cccggatttc
    20761 atcgctcacc attggcgcga tgtctagttt gcgacggcgc tcaagaaacc cacgtggagt
    20821 ttcaacacct ccgttttcag gcggaatcgc gttgacattt cctcaatatg agagtcatcg
    20881 agcgggatcg ttgtggtggg tgtagcctgg aactgaatgc atgacatcag ctcatccatc
    20941 agaggcctcg attccgcaaa cggaattttc cccagtgcgg taagtgcgaa ttttgctaat
    21001 gccgccattc ccgaaacgag gacggcgtta tatagctcat tatccgcctc attttctggc
    21061 gctccagcgc tcaatttttg gattgcggaa tatactggtt gtggcacctc gacatttgca
    21121 gccattaacg cactgacaac gcgaatagcc cactcctcaa tttgtctggc aggcatttca
    21181 gtgatgagaa aagtttttcc ctcatcgcgg tttttcgcct ctactttgaa tgttaacgtt
    21241 ttgcgagcca tattatgcat tctccggcgt cacggtttcc cattcaatta gcccggtaac
    21301 aggctgcaaa atacgagcgg cggcgggaat gactttccac cgttttaata tcccgttagt
    21361 catcgtgtat ttcatgccaa gcgacggaag ccaaacaatt ccattgcagc gaaaaatcgc
    21421 tttgctggtt tgctgcgtcg tataccacgt atctaattta gatcgcgtcg gggaatcagc
    21481 cgtcaggtga aatgtccatg gcaggtcacc aaaaataaaa ccgccagtta atttgccatc
    21541 tgcggtacga atggtttctg ccaaatcagt gtcgcccatg tcaaaaatat tctgagcctc
    21601 aaatgattcc atctgaaaac cagatggata gagatttgtt acagtcaact gaataatggc
    21661 atcagcagcc gttaatgaat ttgccataat tattgaacct caactgaatt cacgatcagc
    21721 ttctgaataa atccaccgtc gcaataccac aaataaactg ttggtgatgt acgcgcatta
    21781 cgcattgcag cagtaaacgg tcctatataa atgtaatacc cctttgtcgt taatgatgtc
    21841 gatacatcag ttccgacgat agagttaata gccagaatct gattatcatc cagcgtagtg
    21901 ccagcagaaa tgccacccca agatttaaac tgctcaactg tactggtcat gcaattttga
    21961 atagccgctc gaccagcgtc gttgtacggc aaataaattt cagactggaa tagcgtgata
    22021 atgtcacttt gcaaattagc attaagccaa atctgaccaa tgtaagcgtc gatccactta
    22081 tatgaaccag ttattgaacc cggataccac tgattggtta cgatgttatt tgcagcgtat
    22141 tttccgtaga aattatatcc atttgtaatc aacgaagaat aatcagcgtt agtatttaca
    22201 ttcgatgcca gaccactttg cacgcgaaat gcaatcgacc gacgcccatt agtcaggtcg
    22261 aaattaaatg atgcgggaat tgccagcaaa gatgccgcat attcctgcgt tccataaacg
    22321 ggaatagtac cgccatcgtt gtatgtattg ataatgtcgt atgcatatgc attcgtgctg
    22381 ccgctggtca cggcataaac cgaattatcc atcaggatgt acgcaaatcg gttgttttgt
    22441 ccggttaccc atgctgctaa tgcctcaccc tgtgattttg tcggcatgaa tgacgtagta
    22501 aacagcaccc aattttgatt ctggtcgaga atggttgtga acaaatcagc aaccacggca
    22561 gcgttagcgc catgagacaa gcttgccccg gtcgccgatg tcagcagcag gcttgcagac
    22621 agcgtgccag atgcataacc gatggctgaa ttagagccgg atgaaacggt tgtaatataa
    22681 aattttttct gtgttgtatc gaatcgaacg ctaacctgag ccgatgattt caccgtgtta
    22741 attgcattct cgatgacggt cgcggctgcg gcaaaactgg ttaccgctga cagattaata
    22801 ttacctgtag ttacggtggt attgttaatc gacagcgata atgtgccgct catagcctgc
    22861 aattgagcaa tcgttaccga tgccatggag ccagatcgca accacgcaga tactcccaat
    22921 tcattatatt gagcaaacag caattcaccc ggcaagcgtg atgcattgtt atatccgctg
    22981 aaatattttg ctgccatcgt gtattcagtg gacagtgcgc caaaataaga ttttacgtca
    23041 tcggcggttg tgaaatttaa cacagctccg gtagggatgc gtgtgtctcc ggacagaatt
    23101 aacccattaa catcaagtgc agatccagat gcagccagta caccgggcag aatctgcacg
    23161 attttactta acgaaatcga cattttttat ccttgaggtg gaaattgaac gtttacaggt
    23221 acggcatttg gatttgcgct ggtcatatat tgctgaggtg ttgttattac cgggtttgtt
    23281 tgtccgataa aatccatcgt ccatcgcggc tcatattgct gctcaccgtt aatcattgtt
    23341 gtttggtgcg ggtcatttga atacagaggc gatagcgcgg aaccatttga agaaaaccat
    23401 ccagccgcat actcatctct aatcatggtt gaaattatga ccgcattgtt ttgtgcgtta
    23461 ggcccgtaaa aatcgatctg acatcgccat tgactatttc tgtttgtttt tttctgtcca
    23521 ttttcaccgt catgaaccca tttgtttgtt gacgtggcta cggaatcaat aggcgtcatt
    23581 acaatgtaat cagtgccaat ttccggcatt ggaacattat tttcctgacc aaggacacaa
    23641 tcagaaacat caacgagaga caataaaaaa ccacggagag ccgtggttaa atcatcctct
    23701 gatattgata tcgtagccgt catgttttcc tctgcaaatt gattatcagt ttgcaccagt
    23761 cataccagag ttctgctatt ttaacgatca gccactcatt tccattcacg accaaaatat
    23821 ccccaccagt ttgattggca cgatttatag cgctgaaatt cccgtgtaca tacgcaacgc
    23881 gagtaatccc ctgcacattc aatgaatcca tttgcttcaa atccattgat gacaattcct
    23941 gcaattgaac tgaaacatca gcctgagaat aagacggcgt gcgcttaccg ctgggtgcag
    24001 taacataacc ggtgtttatt tttattaccg cagggacata atcattgacg agtgacaccg
    24061 cgccggatgt gatattaaac agatccatca tcacccccat tgatttcata atccactgcg
    24121 cgttgcattg aaccggagtc aatcagcgtt ttatctggct ctttacggcc ttttctgatt
    24181 tttgcatcga tagttgattt ggcgttagcg ggaggtatcg atgattcaat cgaatctcga
    24241 atatcctgaa ctatggttaa tcccaaccta tcgaaccctt ttttaaccac gcctggatcg
    24301 gcaccaatac catccaatga cttagccagt tgctgtgacc agtctttagc gtggttatca
    24361 atcgatgtac gcatgaatgg acgagggggg atggttttag tgccgtattc atttgcagca
    24421 gcatacggag caattagctc ccccatatcc tcatttgtcg cccccgccag aataccggca
    24481 ctcagactaa tctgcgtctt ttctgcgata gcctggagtg ccgacagcat tttatcgccg
    24541 ccagaaatac ccataaatca cccccaaggg tggtaatatc gctgcacatg atatctgcca
    24601 ccaaccacat atttccgcgt agcctgccag tattgctggc catatcccgt caacataaac
    24661 catgatttgg ttcccggaac tgccgtagca aatgacgaac tcaccgaccc ctgagatgcg
    24721 cttgataatg ggctcgaaac gcctttagcg gcccactgta gtgattgcga cacatgagcg
    24781 gttagcaaat agagcaacgt cttacgctca atctcaccgt tatccgggtc atacggacta
    24841 atcgacccat cggtgttatc gagatacaga catgcggtgc tgaatgcgtt agtcaattgc
    24901 ccggtggtca gcgtggaaaa attggggtaa ctcgtcagga attcggcagc gtcaaacacc
    24961 acgacgccca taattatgca acctcgtcgg tgacttcttt agtcttgacg gtggggtctt
    25021 tctcaacatc aacaggctcg cggccatgtc gagattcccg gcgctctttt gcagcagcaa
    25081 cggaacttgc atcttctgcg tgataaacca gtgtgttatt gcgctccaga tttctaatta
    25141 aatcggggta ggttgatttg accaactccc atttatcggc gtcgacaacg gtgtggccaa
    25201 acagtccggt tggcagcacg cctttttcct gtcccagcaa gtggaacgcg ttgcctttaa
    25261 gggtcactcc cgtgccatca aaatgaatac cgtgcgggtg attgaggcga acatgaattt
    25321 tacctgacat agaatttcct gattcagaaa aagaagcggc ctctaatgag gccgaattgt
    25381 cttgttgctt acgtggacgt ccgcgcatat cacatgcccg tcatctgagc gacagcagcc
    25441 ggaacccgaa taacgccgcc gtaggtggtc gaggtcactt tctggctgta tgaggacaga
    25501 cccggaatga tacgacccat gcgcattttc tcaccaaaac ctaataggcc cgtttcattg
    25561 ccgagaacct tgggcgcgat aaacatcatt gtctcaacac caccgcttga cagctggggc
    25621 aggctgacaa tggtcaaatt gctgaaatag gtttccagca ttttcagtac cgacacattg
    25681 aaatcggtcg cgccacccag cagagtgcgc aggccgggcg acatggtcag gatcagctca
    25741 tctttttccg acaccagacc ctgcaactga ttaaccagac gtgtaaacag cgtcaggata
    25801 tcgttgtaac gctggacagt ggttttagct gaccacgcag ttgaactgcc tgtgccagtt
    25861 gcagcggcgg taattgccgc agtcagattc ggatcattca gaacgccata gatttccttt
    25921 cctgacacgc ccagcagata gaatttattg gcgtcgatgt cgataatcgt cgcagcagca
    25981 cgctgtttgt cagcagccag attgattttt gcctgcgatg ccatatctgc ttccaaatca
    26041 ccatactgaa taatggtttg gaaccgatac tgttcgcggg taaaccactc ttggttaacg
    26101 cctgcaacgc cgaattgccc gaaatcactg tatgcagcgg tattaccggt aatttcagat
    26161 gcacgccatt tgaaatacgg tgctgtccag tcgccctttt tctcttccgg gtaaagttca
    26221 cgcgcattac gcggcgcggt catgatttcg atgacagttg ggtcaatgta cgccagcagt
    26281 tcagccggta cggttgagtt cgcggaggtg attaacgcgg catcctgtgc gattgctgcg
    26341 cggttttccg gggtaatcca catgcgaccg ccgggaaaca cgaacccgta ttgttttgcc
    26401 tgatcaaacg taatattcat tttgtctcca tgcaggcgcg acaaatacca ctcttatttc
    26461 agagtgtgca cgtcacgcca gattatttag tgtttatgcg gaagctgggt tccagttgga
    26521 aatgacagca aggccagaag ttgagtcaac gcctttacaa acaaacgtgg tctcgacgaa
    26581 tcctgacacg gtggcaccag cagcggcaaa gtgcaccgaa ccattggttt ttgatgcaaa
    26641 tgctttctga cctactgtag gcactgaact gttgtcgtat gtgacataaa actcgccgat
    26701 ttttgccacg gtcaacgatg tgttatctgg cagcgtcata gtcgaaccag acgtcagcgt
    26761 aaaattgtag tagttcagca ggcgctcaat gaacccaacc ggcgcgtcag agccggatgt
    26821 ggatgatttg acctgtgtgt tatcactgcc agcgaataca aactgaccca catacacggt
    26881 attttctgct cgtggattga acggcagata cacaaccgga ttttgtgacg cccgatcgcc
    26941 ctttactgcc ggggcgtaaa actgatttac ctgagattgc agacccattt acaggctccc
    27001 attaaagacg aatatttgcc aaaccggcga atttgccatc cagtttcgcg ggtttgttga
    27061 atgctgagtc accgaccggc gcaggttgag attgtttctg ctgcagcata atttctacca
    27121 taccagcgta accagcaggt tcgaatttac tggtgtcgat gcccttcgct ttcagtgcgt
    27181 gagcatagat gtcggcagcg gagtcaaacg ccattgcatc aactttgccg cacaagccct
    27241 caaccttgct tgccgccgtg gtcagcgcct tagcccgttc gcgctcggcc tgagccactt
    27301 tctcggttgc tgatttgatt gcggcatcca tgacggcctg tgtcaccacg tcttttttct
    27361 cctgattttc ttgaccgcct tccgcgccgc cagcagaacc gttttcgtca ttggctggaa
    27421 ccatcaggca tttcaacacc gcatcaatag tttcaggcgg tacgctggcc tgctccagaa
    27481 tttgtttgat gctctcagcc ggtgattccg catcatatgc cggtgattcc tcttcctgtt
    27541 gcggctcttc ttccacgccg tcgccgattt gtttttcctc tggctcaaca acttgctcgg
    27601 cggcctctag cgcttcagcc agttctgtag gatcgatttc aatatcctgc gccaacagcg
    27661 gcgcaaattt ctgcactgcg gctttagcaa tcgcaacagg ggttttgttt gctcgcacca
    27721 gagcagttaa ttcgcccggt gcggcgtctt gcgccagcag tggtttcagg tgagctgcca
    27781 gcgcagaacg caacgccacc cctttacgat tcaatttctt catcgtatct attacctttt
    27841 tttgtgagag attagacggc attgcgtcat gtacatatac atccgggcca gcccggcctt
    27901 tttccaccag cgcaacatgg tttcccctca aattgcgcat gacaaaatca taattgacac
    27961 cgttgaattc acccggagtg aagtccggtt cgaaaaaata tccgcaacta atttcacgca
    28021 gcgtgccgtt attgattttt tcaatcgcgt ccgaatcagt gacaatcaac gcattatcaa
    28081 gatacggagc actccagaca ggcgttgtgc cgattgatcc gatccgaaat tctttgagcg
    28141 gagcatctgc gctatcctgt cggtgttcgc gcagcagggg cattccatta aatgtgtctc
    28201 tggccttttc cagctcttcg ccagacctgt aaccgtagta gacgcgctca ggttcgaggt
    28261 ttaattcctg ccagcctgga atctccttgc ccaaatacgg agcgacttgt tcttttgtta
    28321 gatgggtctg actaacgtgc aagtagccgt tttcatcaat tcggcggcgc gatggctcag
    28381 aatctagtgc tatttttctg tcaccaatat aaccattggc atatgctgcc ttttctgctt
    28441 cttctgcttt ttcgcgtgtg gggaatggcc cttttgaccc aaaccaccag cggccatttt
    28501 ttttatgtac tggcatggaa tcaccttttt atggcaataa aaaagaccac ctaggtggtc
    28561 ttgattgcgt taacttttat ttctatgcat cgcgcataga ttatttgggt atcaccggtc
    28621 tcatatcaca cttgcagtta acgagctgac ccggcatcac atgctgtctt tcatgcggat
    28681 cccaacaccc ctttgagatg ctgaatacct cgccattcat tttgacatgt gactctcgat
    28741 aggttttgct gccacctgca cgatgcaccc atattgcctc ggtaatacca gctgatttac
    28801 aacgctcaac agcaattgca ttcgaggctt tggcgttttg gtcacgggct atcacttttg
    28861 ctcttctctc ggtaacgccg tagcgctttt ttaactcgtc tttgagatat ccgacatcac
    28921 gcccacgcgt cacgctttcc tgaaccagca cccctatttg cgttaggtat tgctcaggta
    28981 tggacttgat tagcgttacc tgtgtttcat aaagcgaatc gaggacattt ttcacctctg
    29041 gcgtaacttt gaaattgaca gtcataccag cggcgcggag tttattgctc actgacgttg
    29101 atgcgtaggt atttgagcga ttgacgaacc acagagcgat ttcctttgcg cgttcatcaa
    29161 atttcttttg ccaccccgcc attatctcca gcaatcggct atgcaccgat tttgccggtg
    29221 atgcgtcgcc gactattttt gactcctgtc gtttgtattc cgcgacaagc cagtagttaa
    29281 ccgagttgtt catttccttg gttagcgata tcaacctccg gcgatattcc atttccagac
    29341 ccgcgttcgg agacgtcgcc ttggctgttt tcggtttccg cttcttcatt ttgcatctcc
    29401 ggcacagcat cagcatcaat tccagcaaat ccgctggctg ggtcgttagc caataatttg
    29461 cgaacctcca ttgcatccag cacaccgttt tccagataag tggcatgtgt ctgggcgcgg
    29521 atagattgag cctcagccgc cgctttgtcg tcggattcat tcagactgac aaaatcaaac
    29581 gtcactgagc gattcaattt ccccagcttg actatctgta aaatgtcgag gactttttgc
    29641 agacctttgc ggaatacttt ttcctgctgc gtgctgatgt ggtcgttgta attcttgagg
    29701 tcagcgtcgc ccgtattaaa tccggcgggt gatataccga gtaatttaac agccggagta
    29761 cggttaatgg cgacaatcat ttccagttgc tgacgcacaa tatcagttac accagatagc
    29821 ggtgtgttga tattgacgta ttcctccatt tccttatcaa tcgccagaat cccatcattt
    29881 gagcgatacg cagacatata ggccagccgc gaatcgagag attttgttga gttcggattg
    29941 gtcagaatat cctgcatatc agtcatcaat acagtctgac tgaatttatc cagcaacctg
    30001 gactctgcta cacgagcatc ctgaaaatgg attacatagt catacagcac ctgcgcttgc
    30061 ggaacgccga ggaaattata gttcgccttt aacaataccg gcacctcatt gccgcagatg
    30121 cgaattatcc ggctagcgtg aacctctttc cccagcaccc accatgtgcg cggctcaaaa
    30181 taatcagact gcaatggatt tgtggactga tacagtccgg gaaatacgtt gattggctca
    30241 ataacagtaa accgcttgag gtttttcagt tccgccgaca tttcggaaat gtccaacggg
    30301 gtgagtaaat cccgatcatc tgcacctgta tcgatgtaga ttaagcaccc gccgaaatat
    30361 ccgtcaaatt ccgccgcctt gtggaacacc tgccgaacgc agaaatcaat cagcgcatca
    30421 tccagtgttt ttttctcgtc agaactgtcg ccgtctccat ttgtatcaac cgcgctaatc
    30481 tctatccatt cgcgtgtcat atcatcagcg acggtctcaa tgcaggcacg gattaggccg
    30541 ttttgcatca gcgatgatag cgcggcatat cccatgaatg acgggcctag cgaatatccc
    30601 tgccccatct caaaagcgtg ctgaatcaac gcataaccgc cagcgtcttc catcgagtga
    30661 tccattgcca ttctggccga atctggcgta tgcagcgttc tggccgggcc gtacattgat
    30721 ttgatttgct caattgtcgg caaggcatat gtgggatctg acatggattc tatttttgcc
    30781 atcatcgcgg cggatgtggt taatccgcgt cgagtattag gcgtagcaag tccccgccga
    30841 gcagacgcgg tgtttctgtt tttgcgtgac atagtgcctc tagcggaatg gacgacgcgc
    30901 ccgatgttgg gcttgtttga ttaatgctgg attgatgttt attttcccct tgcccttaat
    30961 catcggcgcg agggcatacc ttgtggcatc aataaaatgg ttgtgagcat cgacaatatc
    31021 agtcagaaca tcaccggtaa gcctgtcggt cttgtaactg tatagcctcg cctcttttag
    31081 ccattccttg cagcgagagt ggataatgat ttctttgtaa ctgcgcaaat gagcaatacc
    31141 atcctctacg cttcccgtcc atttctcaac accggtaatt tttggcagat tattgcgttt
    31201 accattacct gttgatttga cgtgactgat agtttccggt ctcgcagaat cggcgcgaat
    31261 aacatgctct tcaatttcag gaaggcgctg aatcataaaa tcagcaatgt catcgttttc
    31321 caacccgact tttccagcct cgtattcgat ccaaagcctg tcattaccga cccagcactt
    31381 aacgccagcg gtcgggtctt ggctaaatcc ccagtcaata ccgtaatatg gaccatccca
    31441 atgggcttct ggctcaaatt cagccacacg atatttacca gccagaattt gtgcatcgct
    31501 attttcccga tatgcgccgt cccaaatcca tgcatacgtc tggtcgtcca atctgtctcg
    31561 gtcattcagc cgttcttggt cgagaacatc gggaaaccac ggattatctg tgtaattcag
    31621 ttcgacaatt ttcgcgccat ctggtttttt tttcctgaat cgcgtatctg tggggctacc
    31681 gtccttttca gggttccacg ttacccaaac ttccgaaccc tcttcacgca cggttggcag
    31741 caatttttgc cacgctatct cgctgactgt ttcggcttca tcaatccatg ctatcagtat
    31801 gcgggctttg gatttgatgc tgtcgagatt atgccgcaag ccggaaaacg cataccaaac
    31861 ccggcgattt ttggtgcgaa tgtatctgtc accaatatca aaataatcac tcagccagga
    31921 tacggaacga atagcctgct taatttcctc catactggag tcttcaagcg agttcataaa
    31981 ctcacgagcg ccgagaataa caccagaaac gccagcttcg gcgaacatat acgcccgaat
    32041 agcagtcatc aaggcaaatg atcgagtttt cgccgatcct cgaccaccgt atgcgccgcg
    32101 ataacgcgct tcgccgctaa ataccgggat tagcttcggt ggtaattcaa tccgtgctac
    32161 tgacatctgg agccaccaat ttaattactg atggttttgg ggacatagag ccatctgacg
    32221 agatatgatc aacgatctgc ttatccagcc cggtaagttt tgctttcccc agcgtggcgg
    32281 caaccgcagc agatgattgc ggggtttcag cgcccagtgc tgcctgtcgg gcttcttcaa
    32341 gttcagccag caacgaatca accgtgacat tgtgacgctg tttaatttca ccctgcaatt
    32401 cagataccct tagtgccacc ttagcgttat caagcagctt gcttgcgttt acatgtattg
    32461 cttccggctt catcttgtca gcagcatacg ccgtgcgata agcctcggaa gcgttacccg
    32521 tttcgatgta tgcctgacag aaagtctctt gctttatagt cagacctgtc attcagaata
    32581 tcctgctggt tttgcttgat gcttgcccgg tgatttttga taccaccctc aatgagactt
    32641 atataaaact ctaaaatgca ccccaataag acgcgcattg tggaatttta taaattgatg
    32701 gaatcaatta aacggggcaa tcccgtattt cgatgtgaat tgcgcggtgg tgagattagt
    32761 tacggtgccg gtagtgttat cgccgacata aaccgcttca ccagatttcg ccatcatgaa
    32821 cggaaaaaat gatttatttc ttgtctggca gagccgcgcc caaaacgcca gcagcggtga
    32881 tgccggctga aatgacaagc gcctagcaga ttcctctgag cagccaagac gcaaggcaac
    32941 gccagcaaca gatagcccac caccccagta aagcgcagtc aacagctcct tagtcacttc
    33001 cattcgatat caccctcaac gcctttggct cttagctgcc gctctacttc tgctcggata
    33061 tcgactcgcc aaaggtctcg gcttttcggg aaccccgacc cgtacaccca tgcgatcatg
    33121 tcgcggattt caaatcctgc gtcctcaata cgcgcagcca ttcgatgctg tgtacgtgta
    33181 ccagcaaacg ctagcaggtg gccgccaggc ttcaaaacgc gcagacattc agcccagaca
    33241 tcaacgtctg gcacatcgta gtcccatttt ttacccatga atttcaggcc gtaaggcggg
    33301 tcagtaatga tgctatcgac tgagctctct ggcattgtgc gcagtacatc taaacagtcg
    33361 gagttgtgca atgtgtaggt catgacaaaa acatctcgcg ttcagcggcg tcagtaagcc
    33421 aagtgctctc cgcatagatc acgacgaaga tagaaaaggt tttcttgatg acgttgacac
    33481 acagccagca cttgtcagca aaaatccgga gttaatcagc ggttccgatt tatcggatta
    33541 tttacgcaga gaaaacaaca aaacagtaat cagcagtcca gcgcagaaaa caagaaatcc
    33601 gggcgccatc agatagcccg tcattttgat ttaccctcgc aattggcttg ccagctacga
    33661 ttatgagcca gaatgtcttt tttggtctgc gtatcgagaa ccttgacatc attgactgtc
    33721 agatatattg gcttgaccca gttacatgac gtatcaacga ccaccggagc cggggcgtgt
    33781 ccagttgttg agcagctcgt tatcgacagc gctatcagag aggtgattaa tagtttcttt
    33841 aacatctgac gcctctttcg ttactttaac ttgccgttcc gcgacagttt ttgttgccgt
    33901 tataaccgat tccgattccg cctttcccgc cgctgacttt gcctcattct tgccttttga
    33961 gtggccgaga ccgaacgcag cggcaatggc agcaattacg gcagcaatcg cagtcagtat
    34021 catgtcaatg ctcatgattg ctggccctgc tgaatgacgc gcccaacgat accggccaca
    34081 gccactacag cagtgatgat gctcattgcg cctgccggaa ttgccgtctt gaattcgtct
    34141 ggcaatgaaa cccacattgc aggaattgcg ccggaaatag ccagggcgtg cacgctaaac
    34201 catcgccacg cctgtttcca gtcttcgatt attttcatgc gactactccg ccactttgtt
    34261 tataaaccac aatcaacgta tcgatagaat gctcgcgctg gccgtaaccc gctcccggca
    34321 gtgacgccca tatattgcag catttgccga tagccgactg aatccgtcca gcgataacat
    34381 catccaatgc tttccgctct cggattaact gtgtcgccaa agcgtcctgc gaattagggc
    34441 caaaatctgg cagttttaac tgcgccttgt atgtcggcca gtagcggtaa agttgttgat
    34501 agcggccaga ggccgtggag cgctgccctt gtttgttgaa gatttttccc ggacgaccat
    34561 tagcgaatgg atgattttgg tagtcagtaa atatctccgg tttaccatca ataccagtaa
    34621 caatgacatc gtaaccgcga ttacgagtga tcggatgtgt tgaggttccc tcggaaaatg
    34681 ccagcacatc caaaaacgca gtcagatttt tattcacgct tacctcaaaa acgaatatcg
    34741 ctactattac gcaactcagc gtaattacgc tgaacagact gagagcgctg ctgctcagac
    34801 gggactatca ctgtcacgtt gggctggttt tgctgcgtcg tcaattttgc gttttccgat
    34861 gaaagcctgg aattttgcat atttgccgcc gtcaatcgtc gagtcatcgc tgatgactct
    34921 tgcccgattt gatacccgca aaatgcggtc agcgcgataa ataacagcgg cataaatctg
    34981 atgctgtatt taccaaaaat tttgatgtca ttgtttccga ccatcgtcat caccgttaat
    35041 gttcacaccg ggcggattta ttcgccggat aatcgatgcc ccatgccacc cagccaaccc
    35101 gcaacacata ccaaccaaag gcaagctcca gccttgctga atgccgagca aatacatcat
    35161 tgccccagca aacgctgaaa taactatgtg atttcgaatc ggaacatttt ttgatgatgt
    35221 gtatgcatat ttggctacag accctatcag ggtcatagcg gcagcgatca gggcagcaat
    35281 gagttgctgt ccatcgtaca tgtgctccac ccgttaggcg gccagagaat tagcgcccgt
    35341 ggagcgcgga aataaaaaac cccagcaatt gagctggggt ttgaattctt tttattgcta
    35401 caaataaatc cagtacaata acaacacgca atttccgcat tgttgtgctt atattaacca
    35461 aatctattca ggtgtcaata tatacaaaat aaaaaccccg ctggagcggc gtgtactggg
    35521 ttgtcatggg tttatatgtt ttcttcatcc agaatctcaa cgattttccc agttttttct
    35581 atcggattgc cattctcatc gcgcaagtgg acattaagag tctctccgat aaaatcattc
    35641 aggtcgccgt cgattgtgtc ttcattaact gtaccaacgg tgtcatcatc cagcaaaact
    35701 gtccattttt catgatgtag cccttatttg tgattgaatg tgtgtcgctt cgtcttgatg
    35761 gcttcaatat aaccccttaa tggttatgtg tcaacgtgcg gatggtttat tttgtgacgg
    35821 gtatctctct tctgacggtg cagaggaatg cccttccatc atcgtcgatg tggactatcg
    35881 tttcagacga tagccacttt gtgatttttt gtggtggaac acccatgtgg cgagcgaatt
    35941 ctgcccggct accgccaaaa ttctgatcga tgtaatcggc taatttcata ttattctgcc
    36001 gttatttttg ggttaacgat taaataactg gtgccgtgct cgtctctcat ttctacagca
    36061 tcaaaaccaa ggtgcgccgc aacgcgaccg cgtaggcgtt gaatttccca cgaatatgca
    36121 cccccgatat cagatccgag ccgaggaaat aacaatacat cagcaaattc atcatcttga
    36181 ttttcgtcat caactattgc gcgggctaat tcattaactc tatccatgtt ttcagaatta
    36241 atttcatatt gatcgagcag aaatcttact atctcctcaa aattggcatc caagtcgcgt
    36301 gattcagcca ccctttcttc atcaacaata tatgtaaaaa tgttaccgtt tccgtgggat
    36361 gccgctgcgt cccagtcgcc gctggcaaag atgccatcaa atacgttttc gctagcaccg
    36421 agcatttcga atgcgccaac ttttattgct ggagctacgg tactgcatga gccgtgaaac
    36481 agtttcattt tttgggcctc aacctcgttt tgatggccta actataacca ctttatggtt
    36541 atacatcaag atggcggacg aattattttt ctctgcgcat tcagccaatt cgattagcgc
    36601 ccaaccatgt gagcgctatg tgagcacgca tcgacttcaa ggcgaattaa ctggtaacgc
    36661 gcctcaaatt aatctctgca gttgattccg cctgatgaca cgccgaaacg agccgctcat
    36721 acatcggttt tacatggcgt gaccatgtcg gctgtgatat ctcaacgcca gcggcacata
    36781 gcgccctgcg gacgctctca gctggcaatc gagagtatcc agtgccgtgg caccgctcac
    36841 attcttttgt caccggtatt ccgccattta tcgctgtagc ccgctcatca atcacaattc
    36901 cgcgtccacg gcaccggcat gaattactga ccaaccccct tcctttgcag gtcgggcatt
    36961 gcacacggac tatctcgcgc cgttcgtgag taacattgca agctagcggt ttatccagca
    37021 tttcgatttt cggcatagca tcaatgacgc gttttccata cgccgccttc agactgaaca
    37081 cctccacgtc gataaaccca tcatcgcagt cagggcaacg ctttacgctt gcagcactac
    37141 gcgcatagtc atgatatgca aatgttgcga gcaattgcag cgctcgcagt ttactatctg
    37201 catcgagttc tgaaagaggt ttgcagtgtc ccgccagact ttttgcaatc tctatcaacc
    37261 cctcaatggc tttatcaggg ctgcttaccc cgattttagc gagaaacaaa tccatcccaa
    37321 tgccgctaga ttggtgactc atgccgatag cggccatcac atcactgata cctaatctgt
    37381 cgcttgctgt tgccggtgat tcgtcggaga gttttggtga tttcggcgag aaaaatttag
    37441 gaattgattc tagattcact tggatttcct ccgctctgga tatgcatccc atgactgata
    37501 atgcgccggt ttaaccgccg gaattattgg tgcaaacaaa gtcagaatgt aaggaagata
    37561 tttcatgatt tatcaccctt gttcagtgag tatcgattga taatttcccg gcggcgctca
    37621 tttttccact caatcgactt ttcatgatcg gatatttctt tttccagtct aagtaattcc
    37681 gctgtcacat gcgtagggat tttatcgatc ataatccacc tcggtattca cagttccgaa
    37741 tctatcttgc cgtgttgtgt atattttttt ttgcgcaagc gctctcttgt tgtgctcatc
    37801 tcctgactga ctcgcatagt gccgtctctt ttttgaatga cacagtgatg atgcttttca
    37861 gttgcacgca ggtatcgcgc ttcttctatt gccgcgttga tatttgtaaa catcatgctg
    37921 cctccctgtt agcctgcatt gcattcagat ataggccgtt aaagctgtat cttatgccat
    37981 cccaaatatt ttccagcgta gcatatggga aataactcaa ataaaaattc tctgctttgt
    38041 ctatttcatt aaacaagtca ctgcggcttt gtgccctgat aatgaaaatg acatcttgaa
    38101 atatcgctgc cgtttcgcat gggtaaatta ttttggtcat accttcccca attcaataat
    38161 gacgatatcc aaactgccgc ctttaacttg atcgccacgc cttactctga aatcatctat
    38221 ctgttcatca tccagcatga atccggcgtg cgtgagcgaa tcaaaaaccg ccttttgcag
    38281 gttatcgagg tcacgtcttc gcttgtctgg agcgctggcg atgatggaaa ttttcagtct
    38341 tgcgggagta ttgatatcga ggttttgttg ctggattatc tggatgattc tttgacggta
    38401 ttctttgcct ttctcgctga tatagtgccc gtgtcgtgcg tgtcgccagt atgtgtttag
    38461 gcttggtggc cacggcaatt tgaggtgata ttcagtcatc gcttaatctc cggcatagaa
    38521 ttcaccatga ttttctttgc aaaatgatat gtaggcattt tttgcatctg ataattcatt
    38581 aaaaaggcca agataatatc ttttcccatt tagtccggcc tgagcttgcc atttacttgt
    38641 tcgcttattc cacacaaccc ctttaactcc tgatgtgttg tttgatggaa ctgctctatt
    38701 catttgattt tccgacttgc tgcattccct taaattattt aatgagttgt tatctttgtt
    38761 tctatccaag tggtctaagt ttgaaggcca atacttatgc ttgtaaaacc aggcgagacg
    38821 atgcgcaagg tgcaattctc caaataattt aatcatgcga taacctaggt tgtttatata
    38881 tccggcctcg tcaccttttt taacgccacc cgttctatcc acattccatg tgaaaattcc
    38941 tgtagattca tcgtaattaa tcaactcaat tagttgtcga tgacttagca tttgatcttt
    39001 ccctccgcca gtaacacggc ctgcgtcctg attacaccct caaggtgtgc cagatgtgcg
    39061 ctatctgcgt ctgtgaggcg tgtacggcgg tctatctcgt catggcacga cgagcatgtc
    39121 cacgcgccga aaaggtcatc aggcttcatt cctgtgccgc aaatgccaga cattcggtaa
    39181 tgcgccagca ccacggtttc agcattgccg ttacaaatgc cctgaagcct gacctgacac
    39241 tcgcggcctc tggcctcttt gcgtaaatta gccattcatt agctcctttt ctctctcgtc
    39301 ttcgtgagtg aagtcgtcgc cgtcaatggg catgagccat gcgccggggc atttgcagtt
    39361 ttgccccggc tgaataattc cctttactcc gtaaagcggt gagttagtgg aattgacgcg
    39421 ccaaatgtca tttctgtttt tgtgcgggcc ataatctacg gcacccaaaa actcaaacag
    39481 gtttacaacc ctgccaatgt tttcgtgatt tatactgtaa acaataatag ccatccctcc
    39541 aattcttaat tcagccatta ttttcctccc gcactatatc catcacatca ccgcccaata
    39601 attcatccgt gcatttttcg cacgcataaa cctcattttc cttcagaccg ccaccgcatt
    39661 gaatgcaata tcctgcacgc tctatgcact gtcgctgata gtcagttatt tgattctgag
    39721 ttagcattat atttctccgg gttctcatca atccacatca ggaatagcag gcagcaaatg
    39781 gcatgagcta aatgtggcaa tccgctctca tcatccagtc gctcaccatc ccaccatgct
    39841 gttatatgcc gtatgctggc atcaaaatag cgacgacgag catcaggaac ggttttccaa
    39901 ttatcaatag cgtatttctt tgctccgaat tccagaacat ccacaacgct ctttattgca
    39961 cctaatggca gtagactaaa tcgccattta ccgacatcgt tttttgtcgt catcgcgtaa
    40021 tcctgtttct ggttctgtcc cacatagcct ttttgagtcc gtagacataa tcgaatgtct
    40081 ggacttcact agctggcggg attttcttgg gtttatttcg actgctgcgg gtgggtctga
    40141 atatacaatt gtcacaaact acttgggttg ggcttctcat caccctcacc tcctgagcgt
    40201 tgcgcccatt catactcgcg tcgagattca tcgctccatt tgacactcct ctcagagcca
    40261 aaccaaaata tgatttctat caactctgtc atgctggcct tgcgcatctt gcttgtgcga
    40321 acgccgaaca gcacaacacc gccatcgata cccggcgcac tgcgttgctc ctgacgtttc
    40381 gttttcagcc atagcgctgt gaaaatgtcc ttccagtcgc tttcgtcata ccgcttacca
    40441 tgccaaagaa cttgccgtga aacgtcctgc agcatcggcc acatgcggtc gttttgcgct
    40501 ttacttcgct tgggttcttt gacgtgaatt tcgtgcggtg atttgtcgtc aattggtaat
    40561 gcgaggatgg tgtctattgc gttatttctg atcgcttcat tgcgaagcag gtaggtttgc
    40621 ttcactgttt attcctatat ttcgtgatta cgaatcaggg tgagtaaaat acagcagcgc
    40681 aataacaaaa attgcactga ttgctatttc aaaaaattct ataaatttca tggctttctg
    40741 ccttgcacgg tgatgccagc tgcgcggata gcatttgctg cgtgctctcg catcatattc
    40801 cagtcgtcac cttcccaagc gacttgatgc gcccccatcg ctgccggtat ctcaaccacc
    40861 agcgcagcgc ggctggcttg ccatgcctcc cagctgcttt tgtgcagttt tttaatggac
    40921 agtaggctag ccccattccg catcatttct tccttttgcg gcttaaacca cgcctcaaac
    40981 tcactgcgca tctggtctgt gctcatggcc tgcctcgctc aaatcgtcga ttagcaaaat
    41041 attataaatt acaggctggt acctgcgcct atactccatc accggtatca ttatacccag
    41101 cacccagaac atgagtccga atattaatcc gccgtgatgt ggcgatacag acatcaaaac
    41161 catgaccatg cttcccaacc acaggaagcc aagcagacat gtcataccat ccgcctccca
    41221 atctccgccg cagcctcgac gatggcacgg cgagtggcgg ctaattcatc cgctccgttg
    41281 accctgacgc tcaggcccgc aatggtttct gctagagccg attccgttgt aatgctaacc
    41341 cgcatacgca attctaccgc cagcctgaaa gcatcgccgt cgttggttag aggattccaa
    41401 tatgaatgca tcgcggccat gattttgttc tttggtgctg gcaaacgggg tccgaaatac
    41461 aagccgtggc cttctctttc ggcgtaatca aaatcaagcg gacccatccc ggcagccttc
    41521 gccgccagct ccagcaattc gcggtcagtc atgccccacc tccaccaact cctgcggcac
    41581 ttctacttct tccccaagca ccgatgcgac tacagcgcgg caaatggcga tcaactgcgt
    41641 ctcacctctc tggattgcgt tatccacgtg tggatgaatg ctggcaatgt gagttaatct
    41701 attttcgtcc tcgtcgtcac tgagccatat tccatatttc tcaataagcg gggcacattc
    41761 tttccaatgt gtgctggggc tgtatcccat cttgtcgaaa gagccgattt ttaatttcgg
    41821 gtctgatagc tcatcgcccc atatccaata tccgccgttt gctccaatcc caaaatccat
    41881 tggatcatac ttaatttcat gaccatcagc ggtcgctaca gcccaatcaa gcgccgctcc
    41941 actcaactca cttgttttca ctttcacttt tcaccccttt aatcagtaag gaatacattc
    42001 atcacaacca gcagaccagc caactccacc acatttaggg cagacatatg gctcggcatc
    42061 ttcatcctgc gtcagtcttt ttagaactga ttccaagtgc tcactttcga atccatcttg
    42121 gaaaaagcag gtgattagtt gcgtcagttc atcctgttca aattcattga gttcgatttg
    42181 catcgctttc acctttaact tttctcgcgc acaaactcgc gccgcctatt cctgtttgtt
    42241 tatattgcct tcaccaacgg cgtgatattc gtttagtgcg tcaacgatga catcgataat
    42301 atcccctgtt gacatttgtc cgagaatttc aataacgcta aaactttgtt caaccccaaa
    42361 aaaactttgt agcgccaaaa ttaattcttg gtatgtagtt ttcacggtct cacctcatct
    42421 ctaatgcgct ctatttcgct aattgctgat aacatcccga tccgcatacg ttccgatttt
    42481 tccaaccgca atttatctcg cacaattgcc agcgctgaat tgagtgattc aattttcgcc
    42541 tgtgcaattg cctgtctatg tgtttgtttt agtgctggct tgatatttac tttcggagtc
    42601 catagcgatt tacggcttct ttgctctgcc atgatagcgt ctaacatttc tcgctcgttt
    42661 tgcatagaat cacccaatgt cacatgcata tggcttatga tgtattccgg cgtttctttc
    42721 acctcaatcc tgtcaccgct agtcattctc agaactgttc tcccagcaga aaaaaatgat
    42781 tcgatgtggc taggctgaat ataaatcggc tcatactcga ttcgctcttg tccatcgatt
    42841 cctgccgatt gaattaggtg tacctgactt aatttgatta cgttcatatc acatcctcct
    42901 gtttattcgg tctaggcgtc aacgtcccaa tctgagaact cgataattaa atcgaatacc
    42961 cgttcgattg atgctttcgc ctgctgtaaa ttctccgctg attcagcatc agcgcactta
    43021 acgccgttaa gctgccccat aaccaactcc ttaaactcta tggcgtcttt gcggttgctg
    43081 attgctctgg ttctgctgag aaagtcgatg atttcagcca tcacgcagcc cctttgtttt
    43141 cgatgaggaa catcccgttg cggatctgct tggctttggt cacatcgccc agcaaaaacg
    43201 gctttggcgc ttcctgaaat ccagagcgga tgttttgggc atcgtccatg ccgatcagga
    43261 tggtttcgca cttctgcaca ccagtgatca gcatcgctcg gtagcgcttc tcaaactcac
    43321 gcgctcggaa cggcaactcc tcctcagtga cgccagcaaa ctcaatccag ccacccattt
    43381 cagaaatcac tgcgtgaatc gcgggatcat cgaatacaac gctgttgcgg cgtccgtagc
    43441 tgcaaatggc cttgtatgcc ttgctccatg cctgtaacgc tctgccgtcc ttgtttccct
    43501 cgatgtgccg tagcaggtca gcaggcttgg gaaagaattg cccgttgtcg gtgtcgcggg
    43561 tatgcccctg aaatgctctt tgcacgtcct cagacggata cggctttagg gcgttccagt
    43621 aaatcccgat catcacctcg gaaatctctt tcccgtatat ctcgccaatc gctgccatcg
    43681 actgagcgaa cttaggtttt tcagtgtcgt tcatcagaat ggtgctccgc tgtcgccctc
    43741 tcctgcccag cgctggagac ggtcaaggtt tcttgcagtg gttgccgagt atttcccggc
    43801 ggcgatcgcc ttcgcgtgct cgttgtcgtc aaggtcgcgt agcttttcga cctgagcggc
    43861 gtcacgcagg attgtctcga tgccgtcata gcgcttgttg gacgggtttt tgcccattag
    43921 ccaagagtcg tatttggcac cagatatcgc tttgcagagg tcagcaacgg tgaatccctc
    43981 atcgagacgg gcgttgattc gcttgcggcg cttctggtcg agttttgatg tcaggtggtt
    44041 atgctctgcc tgccagtggc tgaacacggt tttaatggct tgtgatgctg gttgttctgg
    44101 cggtttctct tcgtcctgct caggtggttt ttcacacgcg tccccagcgg ggactatagg
    44161 ggtaatactg tctttattgt cttttgtaat attgtctttt gtgtttgacc gtttcggtaa
    44221 atcgcttttt accgatttag gaaaggtttt ctttaccgat tcggtaaatg ttttactgaa
    44281 tccgttaaac ttggttttcc actcagaaac ggccttgttc atccctacct gacgcccttg
    44341 ttgtacaagg actcccatcc tgattaactc gtttcttgct gtagagcatt ttgttgccgc
    44401 catccctgtt agctctgcga actgctcatt gccgatccag tccatttttt tgttatagcc
    44461 gtaggtcttt ctccatacgg ccataacaat cagcagttgg tgttgcgtca ggccggataa
    44521 catcacggcc tccagcaatt cgttagcagt tcgcgtgtaa ccatcgtcga gatctgccac
    44581 tcttttctcc tgccccggct caggtccggg gaatttgatt acctcagcag tgttcatgcc
    44641 ccctccctag atgcgcatcg gcataatgac cagcgttcca ttgccgaaag cgctgttgaa
    44701 ctcaacgatt gatgcttctg tgttaccgtt tggcttgatc ttgatgccac agaatttcgg
    44761 gttgtatagc tttgcggctt tttcgatgtc agccagataa ccagcgttaa agccgatctc
    44821 gtcagtaggc ttactttcaa attttgaggt gaggcgttcg atgtcaggga atcgagcgtc
    44881 aattacttca cacaggccag cgccaacgcg caatccatga gcgtcaagat aagaaacgtt
    44941 acctgtatca gtatcaattt cggctttctc gaatctggta ggcttggcac ccttgatagc
    45001 gacgatcacg cgatcttcta ggccatcagt ttcatgttgg ccgataaacg ctctgtggcc
    45061 atctgtcgaa taaagctttt tgtcaggagc aaaacagatg ccattgaggt aataacgaac
    45121 atccgctttt gcttggaaaa tcattgcgct taacagcgcg gttttgctga cagttaaaat
    45181 catggtatta ttcctatcgg tttaaaattc catcgatatc tgagaatccg tgtccttgcc
    45241 cgacgcggat tttttcttta tgagcaacag agcaacttgt ttagccaaat gcgccaactc
    45301 atcgtcatca acgccccatt ccagcactgc cagtaacagg ctcatgcgcg gtatcagcgt
    45361 ttctttccac cgggtaatct gtgatggatt tacgcccact gcctcagcaa tagcgctgac
    45421 ccctttcaca gcaattttgt tcagtaaagc gctctcaatg tgcagagctt ctttgcgtgt
    45481 ttttgcacgt tccatttgtg atacttatcc gtgttgaata cataggcatc ccgtggggtg
    45541 ccactgtgtt tgtttggggt gaatcaccca catcaggctg ttaaagagcg gcgttactta
    45601 tgcggcactg aaaatatcag ggtaaagttc ttccttactg agtccggttg ctgccaaaaa
    45661 tttgttcatt tttcgtgctg gcaaccggcc accgcgccgt ttaatcatgt tgatggcctg
    45721 cggagttaca cccacttttt cagccaagtt cttttggctg ccaccaacag cggctacggc
    45781 tttttccagc ggtgtagtct gcgtgttgat catatctatc tccgtttatt taaatcaacg
    45841 taatgttaac tccttagctg gaataaatca acataatgat gatggatgtg aataaacaat
    45901 atgtttatat tttgtgatat ggagatcgcc atgaaaacag ctgaagacag aatcgaatac
    45961 atcattgata gtgaagggat taggcaaaaa gacctagccc gaatggtcaa tgccacacct
    46021 caaacagtaa ataactggaa aaaacgaaac tcgatcagca aggacgcagc aaaaaaaata
    46081 gctgaaatgt atggctattc cttagagtgg gttcttgatg ggacaggtag cccaaagcca
    46141 atcatcaata gagagtccac agttccaccg gaatcagagt gggatacagt tgatgcatgg
    46201 gataaaaaaa caccactacc tagcgacgag gtcgaagttc catttttgcg tgacatagaa
    46261 ctcgccgctg gagatggtcg aatatcagaa gacgattata acggattcaa attgagattt
    46321 tcgaaagcca ctttgcgccg ggttggcgct aatactgatg ggtctggaat tttctgtttt
    46381 cccgcaaggg gtaacagtat ggagcctaac ataccagacg gaacaactgt tgccgtcaac
    46441 attgacgaca aaaaaatagt tgatggaaaa atatacgcaa taaatcaaga tggctggaaa
    46501 cgcataaaac tactgtaccg gaccgggccg gatacattga gtatacgcag ctataacagc
    46561 gcagaacacc cgccagaaga agccgccatc tcaaatgtag agattatcgg gcgcgtattc
    46621 tggtggtctg taatagatta ctagccacag gcggtgggtg ttggtgcgaa cttcaatagg
    46681 cagcaaacag taaatttact gtatatgaga tcaggtgaat gccataatgg aagcaagtgg
    46741 aattgcggaa acagacgaca tgaagttcag aattgtttat gacggcccag ccctagacaa
    46801 ccatgagatg gatgtccgcg atttggcacc tgcccttctg tcgctatctg atgctttaga
    46861 ggaggcggga aagacaatct atggaaaaga aaggcgcgta tcagtaaagg taaatgcttc
    46921 ttttaaagct ggatctttcg gcgtcgatct catagctcaa tcatcatcac taaccagcca
    46981 aataatcgga gctttttctg gcaatagtgc ctctgctgcc tgcaacataa taagcctggt
    47041 tgggtttgga tatttagcat caaaacagtc ttataaaggt ctgctccagt taatcaaatg
    47101 gctggggcca agaaagataa aaagaataga accaacattt gatggctgca cagagatttt
    47161 cactgatggt gaaagtgagg tttttgagtc tcaagttatt gaattatata aaaacaaaaa
    47221 attaaggcga tctcttgaaa atgtaatcac taaaccttta gagagagatg gtatcgacag
    47281 tttcgccgtc accatcgaca acgggaaaac ttttgttgaa gtcagtaaag acgaagcgat
    47341 atttttcaaa gttgataaca tagaagaatc aataatatct gagtccatta ctgagaaagc
    47401 acttcaaccc ttagatatct cttttcgtga aggacacaag tggcagtttt cagatggagc
    47461 gagcccattt caagctgaag ttagtgatga acgattccta aaggctattg atgaccaatc
    47521 aatagccttt gctaagggtg atctcttgct agttgatttg aaagtaacgc agtatctagc
    47581 agagaaaggc atcaagacta cctatgaaat tgtgaatgtt aagaagatca taaacccaca
    47641 acggcaaatt gaattcccct tcgagtaatc ccacccggct ccgcgccggg ttttttatgc
    47701 ccatcctcaa tcccctttgt cttgaacaca taaatcaaca ctgataaaaa taaataaaca
    47761 taaaaatcaa cggaatgagc atttttataa aaaataaatc aacattatgt tgaccgagca
    47821 attcacatga tgtttaattg attcacagca ggacgctgac tcagtacaaa acggatttat
    47881 tgctctttaa caatacgcct gagggtgttt cacccccaaa aaaacaagcg atttcaccct
    47941 gctgctttac gaagcggcat gaatgaaacc actggagata tccatatgcc aagaaacaca
    48001 cacaagaatt tagcgcgagc gattgctcat cgtgcagcac agcaagccga tattcgactg
    48061 gctcggaaaa ttgaggcggc aatttcaggt tgttcagaac gcgtaacaaa ggctctgatt
    48121 gaattaccgc gagtgacaga agtagatagc ggtgctacat gcatacctga tgttgcgcta
    48181 tttcgagccg ggtatcgtaa atctgaaaat attagtgcga ggtgagtatg aaagacaggc
    48241 caaataaaat tttacttaca tgcattcaaa acaacgaaca ttctccggag cgattaataa
    48301 atcaaaaaag aatggttgag atggctatat cagcatggtc tattggtggc aattgttatg
    48361 atgagaacaa gcacatcgcc ggatattgcg aagaacaaag aggctatttt tacgaggcat
    48421 taaatctaat aaataatctg ctagttaagt ttaattgaaa ggccgcatag cgcggcctct
    48481 tttattacca cataaattct atgggatgcg gtgacgccaa caccggggtg cgaatataca
    48541 gacattgttt gtatctcacc gcatcgccat agagtttatt gcatccgatt aataactgag
    48601 tgaggggata tggacgatat atgcgttgga tatatccgaa taaataacag caacggaaca
    48661 tacttaatgg atggcacgac gcttccagtt tatgttgatg ccgattttgg actgtacgcc
    48721 attgaagagt atgagaaagg cgagccatgt aatcactctc tccaagattt acgagaggat
    48781 ggcgtagatt tcacgctggt aaatattaat aacttaatca gtacagagag gtgagagatg
    48841 ggtaaataca tcatcgtctg gaatgagaat aaaacgcaag ggattcttct cagccaagag
    48901 aacgaaacaa tagatacata cgatgacgca tttcatgcag gcgggggaat ggagcaaggt
    48961 aatgttgcgt cattggctga tgctttcaga aatatatatg gggaagaaca gcagtgctct
    49021 tatcagtgcg tagatattga aaacgaaaat agcattccga tcgaacatga tagctcaact
    49081 tgggatgatg attgggatta tgaagacgct aacaattaac caccaccccc gcgccaacac
    49141 cagataacgc gataacactt aacgccctat tgggcattgg agatagagat gacaaagaaa
    49201 gaaaagcaat tcgttgacga tatgattcgt tgccgtggta tcgattttgc ccgtatcgga
    49261 atgatggttg aagtttacgg agatatcgga accatcgtag gcatgaacgg cagcgctaat
    49321 ttagatgtgg ttttcaccaa tcagcttaaa tatggaaagc atcctgaaaa ctgccatcca
    49381 atttgtgaag ttaaatattt cgacgctgac gggaaagtta ttgctgatta cacaaccaaa
    49441 aatacggcgg catagttata aatcaacggg agggagtgat aagtaaaatt accatccctc
    49501 acatccgcat cacctactaa ttaatcaatc aggagttacc caatggcata taccaatgtc
    49561 ggggctatcc ctatgggtag ctcacagcca gtttttgagt ttgacgcaat taaatctatt
    49621 caacatgcga gagtgaatat tctcgctagt tcatcattta caactaagag ttggctgcaa
    49681 cggttattcg aacaaattgt cgcaacggtt aatcaaaagg ggtgtccgct atgagccagt
    49741 cagtagaaac cctattccca aaaacaagag ttgcagcggc atcttggcat catcactgtt
    49801 taatcatggc tggtgaatgc agaaaaatgg ggaatattgg ggctgctgca aaccatcttt
    49861 attctgcagc aattgcaaga ttaaattttc agcattttac accgagcggc aaagagccat
    49921 tttgaggaat aacaaatgaa atttgaaagg gctgtacgaa agaaagccag gctgcggctg
    49981 gcacttaccg ggccaagcgg atcggggaaa acatacagtg ctcttttggt agcaaaaggt
    50041 attggcggaa agatagcggt aatcgacaca gaaaagggta gcgcatcgct ttactctgat
    50101 atcgctgatt ttgatgtgct agagctcgaa ccaccattct ctcctgagcg ttttattgag
    50161 gctattcatg cggcagaaat cgcagaatac gacacgctga ttatcgacag catcacacat
    50221 gaatgggctg gtgttggcgg ctgtctggag ctggtagaca ccatcgcaaa gaacaaattc
    50281 cgtgggaata gctggtcagt gtggagtgaa atcaacccgc gccaccgcct attccttgat
    50341 gcaattttgc gctcaaacat gcacatcata gccactatgc ggagcaagac ggaaactgcg
    50401 caggttgaag aaaatggcag aaaaaaagtt gcaaaacttg ggatgaagtc agagcagcgt
    50461 gatggcgtgg agtatgaatt cactaccgtt cttgatatag ggcatgagac gcatcatgca
    50521 attgccagca aagatcgcac gaaaattttc tctaatgcag atccggtaat tctgagcgag
    50581 gcagtgggcg caaggctttt agagtggctt gactctggcg tcaatcagca cgacgaggcg
    50641 ctaaagcatt ttactgaagc cgccgcgtca gctaagagcg tggatgagct taaatcggca
    50701 ttcgaagagg cgtggcgaac cctgcgaggg tctacccagc agtcagatgc taagagcgtg
    50761 tacgacatac gcaaatctga attagaggag tcagcataaa tggccagcag aggcgttaac
    50821 aaagtgattc ttatcggcaa tctgggtcaa gacccggaag ttcgctacat gccgaacggc
    50881 ggtgcggtcg ccaacctgac tctggccacg tcggacagct ggcgcgacaa gcagaccggc
    50941 gagcagaaag agcgcaccga gtggcaccgc attgcccttt acggcaagct ggcggaaatc
    51001 gctggtgagt accttcgcaa aggctctcag gtgtatatcg aaggccagtt gcgcacccgc
    51061 aaatggcagg atcagagcgg tcaggatcgc tacaccaccg aagtggtggt cgatatctcc
    51121 ggtagtatgc agatgctggg tggccgcgca ggcggcggtg caccagccgg tggcggcata
    51181 ggcggtaata tgggtggtgg taacgcgcca caaggcggtt ggggtcaacc acaacaaccg
    51241 cagcaagcca accagttcag cggcggcggt cagtcccagt cccgcccgca gcaaagcgcg
    51301 ccgatgccag gcaacgaacc gccgatggat tttgacgacg atattccgtt cgcgcctatc
    51361 ggattgcaat ttaataaaca ttccattcac tcaatttaaa taaaattgac gcagaacact
    51421 gaaccactcc gtgggatttg tgccgcataa aattaaggaa attcattacc tatcaatttt
    51481 ctgttaattc tggaattggt tattcataac gcatggtgga ataaattgaa caacataatg
    51541 attgacctcg aaacgatggg gactaatcct cattcaccca tcgtcgctat tggcgctgta
    51601 ttcttcaatc cggttacagg tgagctgggg aagacattct atcgaaccgt agaccttgaa
    51661 agttccatga aacttggcct tacccctact gccaacacta ttaagtggtg gatgaatcaa
    51721 gataagaaag ttgttgagga agttattaag gcaaaatcaa gcattactga tgctcttacg
    51781 gcattatctc agtttgcagt ttttgcgtat tcacctgcag ctaattacgg tggtagtcta
    51841 ttaaagattt ggggtaatgg ttcagctttc gataacgtta ttctccgcga atcatacaaa
    51901 gcatgtcatt tgaccccgtt ctgggaattc tggaacgaca tggatgtgag aacgattgtc
    51961 gatatggggc gatgtgttgg cttcgaccct aaacgcgata taccatttga tggtgacaga
    52021 cataacgctc tagctgatgc ggtacatcag gcaaaatacg tttcagcgat ttataaaaaa
    52081 ttattaaata aacccaatta gatttacgcg caaagaatac gccaaattaa cttggcgtat
    52141 tatctatgca aaaaacaaat ggtgaacata atgatgctgg aatatcaact ggataaaaaa
    52201 aataagtcag aagctattaa aaaaatacaa cttgggtttg gcggagagtt aaagaaagaa
    52261 tcaaactatg atcgatggtt aaaaatgatt gtgtatagga cgtcatttca cccactacca
    52321 aaacaagata ataaattctt cattcaagat tcattcggta aatatcgcgg atacggtcaa
    52381 ggccgcgtca tgggcgacta atcaggaata aatcatgaac acagcatata ctacagctgc
    52441 aaataaagca gttgcgcacg aacgcgcata tgaatttcat aacgcaggaa tgatgtggtt
    52501 agctgcacag cgctatgctt ctggtaaaaa tatcgaacac tgcgaattac gtgctgaatt
    52561 ttgtcagaaa tttggtaaat atctggagag agacaatgac tgagataatt gatcaggcaa
    52621 atgaattagt tgaaatgaca attcagcacg ctattaatag ccgacctgct ccgttgccat
    52681 ttactggtaa atgccgtaat tgtgacgaga agatatcagt aggttcattc tgtgatgcag
    52741 actgtagaaa tgattttgag ctcaggagaa aaaatgaacg caaataatga aactgcctgc
    52801 ctgatagaaa aaataaaatc tcatctcgaa atacaagatg actcgataaa aaacggaaaa
    52861 atagcaaact ggcaatacat gtatcagaga tatacagcac cagtagtatt gcatcagatt
    52921 attgaataca tagaatcggt tgagagccag ctgacagctc tgcgtcaggc gcagcaagag
    52981 ccggttgcgt acatgtgcga tgatgacgct ggacgagaat acaacggaca caatcaattt
    53041 tcatgtggtc gccgaggcat tcctctatac atccacccca ccgcagttcc ctcggttaac
    53101 gaacaagagc ctgcggcttt ccggtggcgt caccgggcgg atggtgagtt tccggctagt
    53161 aaatgggaat acctaccggc agacctcgct gaccgcttca tcgagcgcgt agtcagcaaa
    53221 gacagggatg tagagtgcga atatgtatac accgcccccg tcatcacgga tagcgctcca
    53281 atcatcacgg atagtgagcg ccagtcggcg attgccgcgc tattggcgca cccggatagc
    53341 tattttggtg agatggcgtg tcgccagatt gccgattgcc tgcgccagct cgaaaccgct
    53401 gagggtcagc gagctggcgc ttttatcgcg tgtaaccgct ggcacgatat gttccgagag
    53461 gcagagaaac aactggcgga gttgcagggt attcccaccc cgccagcacc agctgtgccg
    53521 gatgagttga aggaacttgc cgacaacatc aatgagcgac tgcggaatgg cgggttgagc
    53581 ggaagagaaa cggaaaaact cgaatatgcg tgggccttag tagagacagc aagggcggac
    53641 agggacaacg cctgccgcgc cgcaatgatc aaacagtcaa ccaacacttg tcagttgtcc
    53701 ggtaattccg aacagctggg caatgctggc attaaaagca atgtcgaggg ggaataatgc
    53761 gacttagtaa gagggagatt gagtacataa agcccgcctt tctttactct tggcaaattt
    53821 acgttagcgc atacagaaaa acagcattgt gggatgacga cccgctagtg cctgtaaaag
    53881 ttggtgctgt agcggacggg ctgatacgga aaggggttct ggagctagtg catatgggat
    53941 atagccgctc tgttattcgc ctctcgaaac taggtgaaac attccgttgc cctaaatgcg
    54001 ttaatggccg cacttttgaa ggttccgaga atccagacga gacggtggaa tgtaaacatt
    54061 gcgtctctgg aatcagaatt gataacggaa aaaattaata tgaaagataa agacattcaa
    54121 tcccgcatcg acgcggctgt cgagctgctg aaacaagcgg ccccgcaaat gctggcggta
    54181 aaaggcccgg atggtgcgct tgttgggcca ttgaaagcta ccgaacaact gagtgctgct
    54241 gaacctgtaa ataaacgtga tgagttcccc gccattctgc cctgcgacgt tgaattaaag
    54301 ccgggactga gaattgggaa gggttgccca atcagcactc tgcacttggc cttaaagcgt
    54361 cgcgctgaat atctcgccat gcgagagtat ataaaacccg ctgaacacga agccggggtt
    54421 gcagcaatgc gcaatttcat ccgtgattgc gctcctacca ccggcaaacc gttgaaagac
    54481 cttgagcctg acgaaatcgt tgagctattc gggcgcaaat tccgagtgga ttgcagacac
    54541 gactaccacg gtagggggga aacccgtttc gactttcggc gagcagagga tgggctatcc
    54601 cctatctgtg taacgattgg catcgacaac gacctcggcc ttgtggtcag caaccatccg
    54661 ggattaccgg atggttggaa gattgttcct gttgagccga ccgaggctat gttgctcgtt
    54721 ctcggaatga gtggctcgct tgagtcgatg atagctaggt atcacaagat gctcgccgcc
    54781 gctcccctgc ctgaccattc cgccaaaaag gttggcgccg atcaatttcc tgacttcacg
    54841 aaaatgggca acggtctgct tccgtgtcca ttttgcggaa gcggtgacgt agaagcattt
    54901 gcacaagata aagatgattg cccgaatatg tcggctatcg ttcgttgcca taactgcaat
    54961 gctcagtcag cgcagatggt cggaaaaaac aaaattagta tggcatcaaa ttcgtggaat
    55021 cggcgcgcat cggaggtgaa tcgtggaaaa taaaatgtct gctgggcgcg ctgatcaata
    55081 tcgtgcagag gcactagcag tgagaaaagc gttagggttt tcgccagatg ccgaagatgt
    55141 ttcgccgtct gatttggtcg ccgttatcaa taatctgcgc attaacgcga catggactga
    55201 cgagcaatgc gttgaattct tatccgttgc gttcaggcat tgcgaaatta aaggtgatgt
    55261 tgtctttgat gaaatcaggc agggagttca gtttgcactc gccgccgctc ctcagcccga
    55321 tcaattgcgt gacaatgttc ctgacgccac gaaaatggtt ccagttgaca caccggcaaa
    55381 agacctaatt gaacgatgca agcaagtagt tgataacgcc gtgcaaaata gtgggctgac
    55441 atacggcatg tcacgcattg cggactatca ccacgtcgca ttatcagcac taaattccag
    55501 cggtatcgct aatactaccg aaatcagtac agacgattcc gagcacctgc tcgaattggt
    55561 cgaaatacca gttgagcgtg acggaaacgg atattggtcg caccatgtgt ggagtgcgct
    55621 tttcggcgat cgcgagggta tgccgctaga tgaactgaaa gccacgctgg cagcaaaaaa
    55681 tctcgaatgc acgtatgtcg agctggagtt agatcactcg gctaaagcgg aagccgtggc
    55741 atatcactac tttgagaatg gcgacacaga catcagcgaa tggaacccga tgcgcccaga
    55801 aggggatgga tggttcatcg tgtcaatcca cgaaactgat gaaggaccag tgtgctactg
    55861 ggttcgcccg attccacaga gcgaaggggg tgaagcgtga gtgatgaatt ccttcgccgc
    55921 attaaccaac tggaagatga attaggaaac tgcaccacca cggaggttga gctggtctca
    55981 tacgtaaaga accgtgaaac gggaacctct gaggctcgct attacgtgag gcatagcaat
    56041 cagacaacag ttcttgagca gggattagtt attagccgcg atcagttcgg ttactacaaa
    56101 gccgatctgg taataaccga ctttcctaag ttggggtcag cagaagaggc agcgttaaaa
    56161 ctggctgcat ggctcaaacg aatgggtgag gccattgagt ccagttttaa tagagaaggg
    56221 ggtgaagcgt gagctatgta tttctgattt ttgtaatcag ctctgcttgt aattagccgc
    56281 ctagtgcggc tttttattga tatagaggtc atcatgaaat cagcagacga ctggcttaat
    56341 gagtgcattg agtcagagca cggtattttc aaaaaacgca aagatgcgct ggatttatcg
    56401 attgggcggg aaaactttat tcgacacatt ttccgcagca ttcagtcaac agtagaggtg
    56461 tgtgtgccac agccaatttt aaacgaatct gcgcattcgt atcgaaagcg ggtaatcgat
    56521 gaaatacatc gggctggcgg aactgttgcg acacttaaat aaggggatat gaattgaatg
    56581 acgaggtttt gacactaaaa gaggtctcca cactattgaa agtccacccc gaaacaataa
    56641 agtcactcgt acagcgcggc atcctcccgg caactgacat cggcaccggg caacgtcata
    56701 aataccggtt cgtaaaatca gcgtgtcttg aagcgatgtc aaaaccgatc aacactgtcg
    56761 ccgtgaatgc gggtgacatg accgagaaaa aaccatgtca atcaaacaac ggaacggtgt
    56821 ctggcactgt gatttcacta cgccggacgg taagcgagtt agacagtctc ttggcacgga
    56881 agacaagcga gaggcgcagg aactccacga caagctgaaa gccgattcgt ggcggtctgc
    56941 aaagctgggt gaagcgccgg taaagctgtt cgatgaggcg tgcattcggt ggctgcgcga
    57001 gaaatcgcac aagcgttcac tggatgcaga caagtcgaag ataacgtttt ttctcgatca
    57061 ctttcacgga cgggagttat ctacgataac gaatgatcac attcaggtgg cgatatccaa
    57121 ggcgtacgat agaaagcaca gggagcgctg ggaagaaatg cgggacaggt tgaagcgaga
    57181 agggaaatca gttccagcgt acagtccaaa gccgatatct gaatcgacca agtattcgtt
    57241 tcaggccttc atgcgtgctc tgctacggat agcggccaac gaatggggat ggcttaactc
    57301 ggtgccagtg gtgaaagcgc ggcagccgag aaacaagcgg atacgttggc ttacgcatga
    57361 cgaggcacgg cagttgatcg actgccttcc agaccatttg aaatcggttg ttactttcgc
    57421 actggcaacc gggttgaggc ggtctaacat cctagatctt gagtggtcac aggtggacat
    57481 gcagagaaag atggcatgga ttcatccaga aaatgcaaaa ggaggaaagg cgatcggcgt
    57541 cgcgttgaac gatacggcgt gcggagtatt gagggggcag atcggaaagc atcaccgttg
    57601 ggtattcgtt catgaaatat caacgacaaa gcctaatggt gaaaaaacgc cagaaatacg
    57661 aaagttaaga gttgacggaa ataaggcttg gaatgctgcc ttaaaaaggg ccggaattga
    57721 aaactttcgc ttccacgatt tgcgtcatac gtgggcgagc tggttagttc aatccggcgt
    57781 acctttatct gcattacaag aaatgggcgg ctgggagtcg atagaaatgg tacgcagata
    57841 tgcacatctg tcgccaaatc atttaactca acacgccaaa caaatagaca gcatttttgc
    57901 caagaatggc aaaaatacgg cacaagggat aatcggggaa ataaagaatg cgatgtaaac
    57961 gattaaaaga agtgttggtg ggtcgtatag ggctcgaacc tatgaccaat tgattaagag
    58021 tcaactgctc taccaactga gctaacgacc caacgggacg gattattctc ttcttaacgt
    58081 catctgtcaa acagttcatt ttattttttc agaagtcaga gtattcctca aacatcttgt
    58141 aacctatcac gattttccct tctggcctca acaagatacc tatggttaat attaggacat
    58201 attcatcttc tgacggaaac gtttgctcct gactgactgg agaggcgctg caacgcatca
    58261 tcagatgaat accgtgttac tattaaacac tgtgactttt ttatatctca cgggtggcag
    58321 gaacagcaaa cctgtcaaac cccactatga cagacacaat ccggaataat attacatgac
    58381 agaacaaacg catcatgccc caggcacaac agggcacagc gacctacggc gcaatctgac
    58441 caatcgccat attcagttga tcgccatcgg tggcgccatt ggtacaggct tgtttatggg
    58501 gtcgggaaaa accatcagcc ttgctggccc atcaattatc tttgtttaca tgataatcgg
    58561 gttcatgctg ttttttgtca tgcgcgccat gggggaattg ttactttccg atctcaatta
    58621 caaatcgttc agtgacttcg ccgccgacct gctaggacca tgggcaggct tttttaccgg
    58681 ttggacttac tggttttgct gggttgtaac aggtattgcc gatgttgtcg ccatcagtgc
    58741 ttacgcacag ttctggttcc ctgagctgtc gcaatggctc agttctctgc tatgcgttct
    58801 gctacttttg accttaaatc tggctaccgt caagctgttt ggcgaaatgg aattttggtt
    58861 cgccatgatc aaaattgttg ctatcgtcac gctgatcatc attggcgttg ggctggtcat
    58921 catgaacttt acctcaccat ccggtgccgt ggcatccgtg accaacctgt ggcaggacgg
    58981 tggacttttt ccgaaaggac tcagcggttt tttcgctggt tttcaaatcg ctgtgtttgc
    59041 atttgtcggc attgaactgg tcggtactac agctgcggaa actaaaaatc cgacagtggt
    59101 tttgccacga gcaatcaacg ctataccgat acgtattatt atgttttatg tatttgcgtt
    59161 gatgatgatt atgtcggtta ctccatggag ccatattgca gcagaccgca gcccgtttgt
    59221 tgagatgttt gtattagtag gttttccggc cgcagccagc gtcattaact tcgtagtact
    59281 cacatcagca gcatcttcag ctaatagcgg cgtgttctcg actagccgta tgttatttgg
    59341 gctagccaga caaggtgatg caccagcgcg ttttggcaag ctatcaaaac gtgcggtgcc
    59401 ctcagcagga ctcctttttt cgtgcctgtg cctgctctca ggtgttgtgc tgatctactt
    59461 gattccgaat gtcatgacag tttttacgct ggtcaccacc gtatctgcca ttcttttcat
    59521 gttcgtgtgg agtattatcc tgtgctctta cctggtgtac cgcaagcatc ggccacagtt
    59581 gcaccaagca tcttcatata aaatgccatg gggaattatg atgagctggg cctgtctggc
    59641 tttctttgct ttcgtgctga tattactgac attgcaacca gatacgttgc aggcattgat
    59701 agtcacacct atgtggtttg tagttctggc gatcacctac ttcttcattc gccgtggtag
    59761 agccaacgct gattctcaag cgtagcactc agtaccagcg ccaatttaaa acagcgtcag
    59821 atccaatacg gtcagctaca cctgatgaca tagctgaccg tatccgatta gacacttact
    59881 gtttgtcgta caccattcac tgcgttttta gcctgttcgc actgattcaa aatagtttgt
    59941 gcgtgcgaat acagaatctt gcccgcttct gtcggcgtca cgccacgacg actacggacc
    60001 agcagttgct tctccatttc gctttcgagc gtagcaactt gctggctcag cgctggttgc
    60061 gcaatatgca acatttcagc agcttgggtc aggctaccaa tatcaacgat tttcacaaag
    60121 tatttgagcc gtctcagatt catgtgtacc tcccgaatag ttacagctaa gtaactgcaa
    60181 gaagcgcgcc agattatttt attattatcg aaaaaaatgc ggcgccgtct taacatgctt
    60241 aaaaataagt aaaagcaatg gcgatagcag caacagtaac aatgctaatc ctctcatcat
    60301 aattgatagt atgtcagcgc tgtctcatgt tgcaccaaac tggtgcggta attgctatct
    60361 gaaagtgcac gcattagtca atcactcatc atctggcgca aaaaacacca accacctcag
    60421 taatttcaac aatttgatta taagttcatc aaacagttac accttgcgtc atcatgcttt
    60481 gacaagtaat caggctatcg ctatcatcca caccactagc gattcctctg tagttcagtc
    60541 ggtagaacgg cggactgtta atccgtatgt cactggttcg agtccagtca gaggagccaa
    60601 tttaaagaaa gcagacgttc actgacgtct gcttttttgc tttatatcaa ttggttatcc
    60661 ccttcttcag gttcgccctc gttcaccaaa aaacgctcga agccataccc ttttgctggt
    60721 aaaaatactg gtaaagctgg ttcgatttcg tttttaccag caatcggagg gaaccgtcat
    60781 gtcacttact gatactaaag taaaaaatgc caagccgtca gaaaaggcgg tgaagctcac
    60841 tgacgggttc ggcctctact tgctggttca tcccaatggt tccaaatact ggcagttagg
    60901 ctatcgcttt gaaggaaaac agaaggtgtt ttccattggc gtctacccgg ctgtttcact
    60961 ggctgatgcc agacaacgac gggatgaggc aaaaaagctg ttagcggctg gcgttgaccc
    61021 cagcgctaaa aagcaggctg acaacaaaac tattcaagag cgacgtaaca atacccgcgc
    61081 tttcaaaact gttgctaaga gctggtttgc caccaaaacc acatggtcgg aagattatca
    61141 gcgttctgtt tggacacgta ttgaaaccta tctgtttcct gacatcggta acaaggacat
    61201 tgctgaactg gatacaggcg atctgctggt tcccatcaaa aagatagaaa agctgggcta
    61261 tctggaaatc gctatgcggg tgaaacagta cgccactgcc attatgcgct atgccgtcca
    61321 gcaaaagatg atccgcttta accctgccta tgatttggaa ggtgcggttc agaaaccaca
    61381 aacggaacac cgccccgcta tcgagctgga agagatacct accctgttgg aacgcattga
    61441 aggctatcag ggacgtagca ggctgaccct gctggcgata aaactcactc tgttgatatt
    61501 tattcgctcc agtgaactac gctttgcccg atggtcagag atcgatttca aaagcggttt
    61561 gtgggttatc cctgaacagc gtgaagccat tgaagggatc aaacattcgg gccgtggtgc
    61621 caaaatgcgc aggaagcatt atgttccctt atgccatcaa gcactggcaa ttttggaaga
    61681 gcttaaaggc ctcacctatg acgttaacgg tgatgacggc tttatcctga ctggctgtta
    61741 tgatgcgatg aagccaatga gtgaaaacac catcaataag gcactacgca aaatgggcta
    61801 tgacaccaaa accgatctgt gcggtcacgg ctttcgaacg ctggcctgta gtgccttgat
    61861 tgaatcgggt atctggcctg aagatgtggt agagcttcaa atgagccaca tggaaaagaa
    61921 caacgttcgc gctgcctaca ctcacaaggc caaacacctt gaacaacgcc gcctgatgct
    61981 gcaatggtgg gctgattttc tggacgctaa ccggaatggg atggtcaggc cgtttgagtt
    62041 tgcacagaag ggataaattt gactcttgct caaatttgag taagataact gtgaggctta
    62101 ataagagcag ggctatcgga tatcacggtg atattggttc gatagtgtgg attgtaaggt
    62161 tcaccgacct tatggtagcg gtaatcgtaa atgcaagttt atgattggca tgtgacccaa
    62221 ctcaaagaga gttagctaag caagcgctgc gactaccaac ctcaataatg aaaaaggtgt
    62281 tctgaaaaga gcaccttttt catttataga acagaaactt gtgctaccaa tgtaccgttt
    62341 gggtttatgt tacgatatgc cgtaacaacg ctataaataa ggctaccctc atcattgggg
    62401 ctgtcaaatg ccgctaacac agcacatcct ttacgccctc tcagaacaac cactcggtgg
    62461 tatcctccca tttccgagaa ttcacatact atccctgcct gatgaacaat aatctcggat
    62521 acaaaacgag ggacatcatg gatggtagga aatccccact gaataagctt agatcctcgc
    62581 tctgaccaga tatgcctaac accaaagcct ttgtgaggac caatatgctt acccgcacga
    62641 agaaaaatct tccctccgag ttggttgaac tgtttactgg ttatttttac ttcaccccaa
    62701 tgctcagtat tgttcaccgg atgcaaaata ttatgatttt catggaaaac ataatcagca
    62761 ggaatttcca ttaacttatt attatgtcta ttcaaactgc cattccctat gcattatcat
    62821 atcatcacaa tgaacgaaag attgtagcca gatccgtgat gctaaagcaa cgtcaaactc
    62881 ttatccagat caggttaggt caaacacctt gaacaacgcc gcctgatgct acaaaggaga
    62941 actgatgctt tatgttgccg gaaagcaata gtgagaccgt ttgagtttgc gcagaaggga
    63001 taaataaccg ccacggatgg ctgatattcc actcaactat ttcgttaatg atgcgctata
    63061 atcatcgtct aaataacaca tagtatgagg ccaaatcgtg gatgaaagat atatcattat
    63121 cccgcataaa accaatctat catatagatt tgacggcaat gaagaggtta ctattgaatt
    63181 agaaatgcac ctgattttcg ataccgttaa tcaacgagtt attactgttt gcaactcatt
    63241 ggaagaagca cagataaaga ttgaagagtt aaaaagacaa gttagctcaa gacctcgtat
    63301 gaaataaaag gcattacgtt atatatccta tgatgctctt taatcagtgg agcatcaaaa
    63361 tacgcataca tattgctacc atcaggaaat acataccaac agcagccatt ggatttatgt
    63421 ccccattctt cacgaaaaaa cccttttcga atattgacac cttcaggcca atcagtgatt
    63481 ttttctatca aaaaagagtt atcatctttc attgttaacg agaataaaga aaactcctca
    63541 acatcaacga taaaaggcat ctttacatat ctctgataaa cctttccatc tttatgcaaa
    63601 aagaacagtt ctttaccaca ccaagggatt ttattttgat catatttagc tgaatcgagt
    63661 tcttttacat tatcaggcca gttgttttgt acgttaatta atattttcat ttaaacacct
    63721 atgttatttg tgatttatta tttattatca atagcaagtt tttttgtcaa atttcactct
    63781 catcatataa catcgtaaca caagagttaa attcaatatc aaaaacatag gt
//
