# Supplementary material for: May the Phage be With You? Prophage-Like Elements in the Genomes of Soft Rot Pectobacteriaceae: Pectobacterium spp. and Dickeya spp
Source: Front Microbiol. 2019 Feb 14;10:138. doi: 10.3389/fmicb.2019.00138 (PMC6385640; doi:10.3389/fmicb.2019.00138)
Supplement: Supplementary file 2 [file Data_Sheet_2.ZIP › Supplementary_prophagesGENBANK_files/Genbank FILES _SRP_prophages/phiDch1.gb]

LOCUS       Exported               40125 bp ds-DNA     linear   UNK 02-AUG-2018
DEFINITION  phiDch1.
ACCESSION   .
VERSION     .
KEYWORDS    .
SOURCE      phiDch1
  ORGANISM  phiDch1
REFERENCE   1  (bases 1 to 40125)
  AUTHORS   .
  TITLE     Direct Submission
  JOURNAL   Exported Aug 2, 2018 from SnapGene Viewer 4.2.3
            http://www.snapgene.com
FEATURES             Location/Qualifiers
     source          1..40125
                     /organism="prophage phiDch1"
                     /mol_type="genomic DNA"
                     /note="/genome_id=6666666.356843"
                     /note="/genome_md5="
                     /note="/project=robertczajkowski_6666666"
                     /db_xref="taxon:6666666"
     CDS             1..1833
                     /codon_start=1
                     /product="Excinuclease ABC subunit C"
                     /label=Excinuclease ABC subunit C
                     /db_xref="SEED:fig|6666666.356843.peg.1"
                     /db_xref="GO:0003677"
                     /db_xref="GO:0004518"
                     /db_xref="GO:0005622"
                     /db_xref="GO:0006281"
                     /db_xref="GO:0006289"
                     /translation="MTERFDAQAFLKTVTSQPGVYRMYDASDTVIYVGKAKDLKKRLSS
                     YFRAHVASRKTEALVKSIRQIDVTITHTETEALLLEHNYIKRYQPRYNVLLRDDKSYPL
                     IFLSGDTHPRLSVHRGAKHAKGEYFGPFPNGNAVRETLMLLQKLFPIRQCENSVYRNRS
                     RPCLQYQIGRCLGPCVSGLVSEEDYQQQVEYVRLFLSGKDQQVLIRLVERMEAASHALK
                     FEDAARIRDQIQAVRRVTEKQFVSGDDDDLDVIGVAFDAGMACVHVLFIRQGQVLGSRS
                     YFPKVPGGTELAEVVQTFVGQFYLQGSASRTLPSDILLDFSLPEYQLLAESLSEQAGRK
                     IQIQTRPRGDRARYLKLARTNAHTALATKLSQQSTVQQRLTALASVLEIEKINRMECFD
                     ISHTMGEQTVASCVVFNADGPLRSEYRRYNITGITPGDDYAAMNQVLRRRYGKSIDESK
                     IPDVIVIDGGKGQLAQAKEVFASLQVSWDKNRPLLLGVAKGSDRKAGLETLFFEATGEG
                     VALPADSPALHVIQHIRDDSHNHAISGHRKQRAKVKSTSSLETIEGVGPKRRQMLLKYM
                     GGLQPLMNASIEDIAQVPGISHSLAEKIFHALKH"
     CDS             1891..2439
                     /codon_start=1
                     /product="CDP-diacylglycerol--glycerol-3-phosphate 
                     3-phosphatidyltransferase (EC 2.7.8.5)"
                     /EC_number="2.7.8.5"
                     /label=CDP-diacylglycerol--glycerol-3-phosphate 3-phos
                     /db_xref="SEED:fig|6666666.356843.peg.2"
                     /db_xref="GO:0008444"
                     /translation="MRFNIPTWLTLFRVVLIPFFVLAFYLPFSWAPMVCAGIFVFAAVT
                     DWFDGFLARRWKQTTRFGAFLDPVADKVMVAVALVLVSEHYHSWWITLPAATMIAREII
                     ISALREWMAELGKRSSVAVSWIGKIKTTAQMVSLVGLLWRPERMVEAAGVAALYVAAVL
                     TFWSMFQYLSAAWRDLLEH"
     tRNA            2581..2653
                     /product="tRNA-Gly-GCC"
                     /note="/transl_table=11"
                     /db_xref="SEED:fig|6666666.356843.rna.1"
     tRNA            2683..2753
                     /product="tRNA-Cys-GCA"
                     /note="/transl_table=11"
                     /db_xref="SEED:fig|6666666.356843.rna.2"
     tRNA            2765..2848
                     /product="tRNA-Leu-TAA"
                     /note="/transl_table=11"
                     /db_xref="SEED:fig|6666666.356843.rna.3"
     CDS             complement(2883..3041)
                     /codon_start=1
                     /product="hypothetical protein"
                     /label=hypothetical protein
                     /db_xref="SEED:fig|6666666.356843.peg.3"
                     /translation="MNKTFFKFGLITAYKTVIINAREKRCRHSAAILSPLAKLQAQKNR
                     LVAVMFF"
     CDS             complement(3051..3269)
                     /codon_start=1
                     /product="Prophage P2 OGR protein"
                     /label=Prophage P2 OGR protein
                     /db_xref="SEED:fig|6666666.356843.peg.4"
                     /translation="MMRCPLCHHAAHTRSSHEVTSHTKERYNQCTNINCGHTFITMETF
                     IRSIVVPASINSVPQHPKANGQTVLNF"
     CDS             complement(3333..4442)
                     /codon_start=1
                     /product="Gene D protein"
                     /label=Gene D protein
                     /db_xref="SEED:fig|6666666.356843.peg.5"
                     /translation="MSLLTQMSTGQASVPDYRITISGKDVTETLDKRLMSLTITDNRGF
                     EADQLDLELDDADGQLMLPRRGAQITVFLGWKGYSLTKKGTFVVDEIEHSGAPDRLTVR
                     ARSADFRQSLNIKREKSWHQTTVGEIVREIATRHKLTAALDEAMAAQQVDHIDQTNESD
                     CSFLMRLAKEHGAIAAVKDGRLLFLRQGQGKTASGKPLPAAIITRDDGDSHRFTLADRG
                     AYTGVVAHWLDTREAKKKKEVKVKRRRRRRRASTKKKKEPDPKQGEYLLGTDENVLVLS
                     RTYPTKKFAERWAKSYWEKLQRGVASFSIDLARGREDLFPELPVKVSGFKREIDQADWT
                     ITTVTHSLNDRGFVTSLELEVKIDGLDMQ"
     CDS             complement(4439..4972)
                     /codon_start=1
                     /product="Phage-related tail protein"
                     /label=Phage-related tail protein
                     /db_xref="SEED:fig|6666666.356843.peg.6"
                     /translation="MININLSVSVMMALGLFVFGLQTVPYQELQRQRNWRHVTNSRIGQ
                     RPAWQFIGPDADTLTLQGVLLPEITGGRLSLLMLEKMAESGKAWPLIEGTGTIYGMYVI
                     ESLNETRNMFFFNGSARRIEFTVTLKRVDGGFGDVTGSLSEQWASLQDSATGYADKVTT
                     AAGKAIDTVKGVFS"
     CDS             complement(4969..7821)
                     /codon_start=1
                     /product="Phage protein"
                     /label=Phage protein
                     /db_xref="SEED:fig|6666666.356843.peg.7"
                     /translation="MSNSSLRLQVVLDAVDKLTRPLRQAQAGSKGLSAAIKASQARLKE
                     LDTQATRIDGFRKASKQAAVVSNSLKGAREEAARLATQFAATERPTAQQARLLQQAKER
                     VNELQDKYNGLRVSVQRQREALNASGIDTKKLSDAQRQLRSEAQAVTDSLQRQQQALKR
                     LGERQQKLNAIKSRHEKTLEARNKLAGTGGTMVATGIATAAPMIAPIKAYADSEDAATQ
                     LAGAMMGPGAKVSAEFEKINTLAVSLGDRLPGTTADFQNMMTMLRRQGLSAQSILGGTG
                     EAAAYLGVQLKMAPTEAAEFAAKMQDATGTAEKDMMPLMDIIQKGFYAGVDPTNMLGGF
                     AKIGSAMSVIEKKGIDAAKAFAPLLVMADQQGMEGGSAGNAYRKVFQAGLKVDKVADAN
                     DILKESGFKGVKLDFTNGKGHFGGIEKMYAQFAKLATLQKNNPVKAQEVISTIFGDDAE
                     VAQVVNNMIEKGIDGYRETQAKLEQQASLRERVDAQLQTLGNKWDAATGSFTNAMASIG
                     ATVAPDLKRLIDELGEMAGALNDFVKTHPVLVGNLFKLAAGFAITATAVGILFVVVASV
                     MGPLSLLRMSLGMLGLQLPTLGGVVARFAGLFGGTGSVFTMLGRVLLWLVASPFALLRT
                     ALMFVGTFIGVLLSPVALFMAAVVAVGVAIYQHWEPINAFLAGVVEGFQAAAAPIVAAF
                     EPLKPVFAWVSEKVQSLWKGFTDLLEPVKWSAAELNNAAAMGHKFGEFLADGLSKVMHP
                     LDSLKSGVSWLLEKLGVVKTESDKLPSADVIQKAQDAKAAAAVPVNPTNATPWGAPPVY
                     SPFAGMYDSGGIIPAGQFGIVGENGPEIVNGPARITSRRRTAALAAAVLGAAASPLVAQ
                     PMHPFSLPASQYSSAGQAYSAGRLATAAPVTVNAPISIYTQPGQNATDIAREVARQLDE
                     RERRARAKSRSNYSDQGGIG"
     CDS             complement(7814..7933)
                     /codon_start=1
                     /product="hypothetical protein"
                     /label=hypothetical protein
                     /db_xref="SEED:fig|6666666.356843.peg.8"
                     /translation="MADIATVFHWPPAVTEGMSLTEVLTWRHKAILRSGAGDE"
     CDS             complement(7948..8250)
                     /codon_start=1
                     /product="GpE+E'"
                     /label=GpE+E'
                     /db_xref="SEED:fig|6666666.356843.peg.9"
                     /translation="MQELNTEKAVTLDSPLKRGEAVIESITVRKPTSGALRGVRLQALM
                     ELDVNAVMVVLPRVTTPALTAAEVLELDPADLVALSVEVVTFLLPKSARQDSPLS"
     CDS             complement(8312..8827)
                     /codon_start=1
                     /product="Major tail tube protein"
                     /label=Major tail tube protein
                     /db_xref="SEED:fig|6666666.356843.peg.10"
                     /translation="MALPRTLKYLNLFNDGNNFMGVVESFTPPKLTRKLEKFRGGGMSG
                     TVDIDMGLDDGALECEWQIGGWEPLIFKQLGTAKADGVQLRFTGSIQRDDTGEVQAVEI
                     VLRGRHKEVDSGEAKQGEKTTTKISTVCTYYKLTINGDVLAEIDILNMIENIGGEDRLA
                     EHRSAIGL"
     CDS             complement(8839..10011)
                     /codon_start=1
                     /product="Phage major tail sheath protein"
                     /label=Phage major tail sheath protein
                     /db_xref="SEED:fig|6666666.356843.peg.11"
                     /translation="MATDYHHGVRVTEINDGTRTITTVSTAIVGLVCTADDADAATFPL
                     NKPVLITDVLTASGKAGESGTLARSLDAIADQAKPVTVVVRVPQGESEAETTSSIIGGV
                     TADGKKTGMKALLAAQAQLGVKPRILGVPGHDNKAVAVELASVAQSLRAFAYVSAYGCK
                     TVADAIAYRGNFSQRELMVIWPDFVAWDTATDAEATAWATARALGLRAKIDEQTGWHKT
                     LSNVGVNGVTGLSADVFWDLQDPATDAGLLNQNAVTTLIRKDGFRFWGSRTCSDDPLFA
                     FESYTRTAQVLADTMADAHMWAVDKPLTPSLARDIIEGIRAKLRELVAQGYLLGGDCWI
                     DESVNSKDTLKAGKLAIDYNYTPVPPLENLLLRQRITDTYLMDFTGQVSG"
     CDS             complement(10105..10713)
                     /codon_start=1
                     /product="Tail fiber assembly protein"
                     /label=Tail fiber assembly protein
                     /db_xref="SEED:fig|6666666.356843.peg.12"
                     /translation="MAEQIITELDENGLAVDAGWITVYHADHVTREYTCKSEEFLMRGT
                     GIPADSYTDVPPSAVAGYAIRRRADGSAWETVADYRGQTAYRTTNGQAQTVTALGELPD
                     DLTLLAPSTEFDKWNGEQWVTDVAAQQAAAVAAAQQEQAARKATATARITELSYAVELG
                     IATDVEQAAMTEWKTYLVQLSRIDTSAAPDIDWPTPPEK"
     CDS             complement(10715..12076)
                     /codon_start=1
                     /product="Tail fiber protein"
                     /label=Tail fiber protein
                     /db_xref="SEED:fig|6666666.356843.peg.13"
                     /translation="MTTKYFALLTAKGAALLANATALGRQLQITQMALGDGGGALPTPD
                     PAQTRLTNERRRAPLNSLSVDPANTNQIIAEQVIPEDEGGWWIREIGLYDAAGNLIAVA
                     NCPETYKPQLQEGSGRVQTVRMILIVSSTDAVTLKIDPSVVLATRAYTDAKAAETKAYI
                     DDRAENTKGDAKNYTDAKTGSVEIEVKAHADNLMMMHVSAANPHPQYAPIASPSFIRGI
                     SVVADGASALLMRNETVKDIGLMMQSQSGAPLLQLLYQLSSHSVQMRNAAANSALVMYD
                     SGDISIAPPAGHATYVSSHLILNAPAGGDNSDSAITSAWFGAELAGIPLPWPGAIAPTG
                     WLKCNGQPFDRNRYPRLAQLYPSGMLPDLRGEFIRGWDDGRGVDSGRGILTAQSQSIQP
                     FNVGIRYSITRITGGDTPINAVDGNGVNTAYTTTFPGDETRPRNIAFNYIVRAA"
     CDS             complement(12073..12681)
                     /codon_start=1
                     /product="Tail protein I"
                     /label=Tail protein I
                     /db_xref="SEED:fig|6666666.356843.peg.14"
                     /translation="MNNSLLPPGSSALERRLAAACGDISALSVPIRQVWNPDTCPVSFL
                     PYLAWAFSVDRWDENWPEAVKRQVIKDAFFIHRHKGTLSALRRVVEPFGYLIRITEWWQ
                     AGGTPGTFRLDIGVQNSGITEETYLELERLIADAKPVSRHLLGLAIHLDSQGAMPIRAG
                     QYSGDALTVYPCFPETITTAGAEIHAAAVHLSDNVSVTA"
     CDS             complement(12674..13582)
                     /codon_start=1
                     /product="Phage baseplate assembly protein J"
                     /label=Phage baseplate assembly protein J
                     /db_xref="SEED:fig|6666666.356843.peg.15"
                     /translation="MSVIDLSQLPAPDIVTVPDFETVLTARKAAYLALFPADERDAVAA
                     TLALESEPVVKLLQENAYREILLLQRINEAAQACMVAYALGNDLDQLAANYNVERLTVT
                     PADETTVPPVDAVLESDDDLRQRIPAAFEGLSVAGPTGAYTFHALSADGKVADATAISP
                     SPAAVTVTVLSREGDGTASDELLTAVTDALNDESVRPVADRVTVQSAHVVPYSVTARLY
                     LYPGPEAEPIRQAAEARLIAYINAQRRLGRDIRRSALYAALHVEGVQRVELDSPPMDVV
                     LDDTQAAYCTGYQVTIGGNDE"
     CDS             complement(13579..13911)
                     /codon_start=1
                     /product="Putative phage protein"
                     /label=Putative phage protein
                     /db_xref="SEED:fig|6666666.356843.peg.16"
                     /translation="MNQQTGGRISEMAHLRQSIRDILLTPIGSRLARREYGSLLSELLD
                     QPQNAATRLQVMAAIYGALHRWEPRLQLTAIDLTTTLDGRMVADLTGELVSGQSAALSV
                     SLGSDV"
     CDS             complement(13926..14459)
                     /codon_start=1
                     /product="Phage baseplate assembly protein V"
                     /label=Phage baseplate assembly protein V
                     /db_xref="SEED:fig|6666666.356843.peg.17"
                     /translation="MNAQTTEIMRLLLNLIRVGVVIDVDPDNWLCRVQTGELQTGWLNW
                     LTTRAGRARTWWKPSPGEQVLLLAIGGELTTAFVLPAIFSNDNPPPSTSDDALVTVFPD
                     GARFEYEPDSGQLLINGVKSVVLNADTLTLNAAVTINGPVTQQNGSLSSNGVVVHTHQH
                     GGVQSGGSNSGGPV"
     CDS             14580..15290
                     /codon_start=1
                     /product="hypothetical protein"
                     /label=hypothetical protein
                     /db_xref="SEED:fig|6666666.356843.peg.18"
                     /translation="MDTIKQVNEIVGAPLWGVLFPIVVYFFRILIKKFNSVPKEKESLL
                     LIDGLKPWMLGFGYSFSATKAYRANNKIDYFSAVIFTVVFIVFLVSLATFVNQHALKVP
                     SGWADLYYENAGEREMFLLSQDKARNVYGGKMWGLDVSVCKRNNIELSNELHISKELIE
                     IICNSIGHKEYFDEIARKIEETNILKVVIYVSYFAFLLAFTYVIIDMWVSLYIRSKIFK
                     YYEKEKAKAYEYLT"
     CDS             complement(15282..15725)
                     /codon_start=1
                     /product="Phage tail completion protein"
                     /label=Phage tail completion protein
                     /db_xref="SEED:fig|6666666.356843.peg.19"
                     /translation="MDDFQHVEGWLAALLAKLTPAERKTLLREVARDLRKRQQDRIRLQ
                     QNPDGSAFEPRRVSPREKPGRIRRQMFRKLRTAKYLKATATANVAEVGFTGNVQRMARV
                     HHYGLRDKVRERGAVVKYPARQLLGMDSAVSNALLAKLTTLLR"
     CDS             complement(15718..16149)
                     /codon_start=1
                     /product="Phage tail protein # FIG072132 and FIG003673"
                     /label=Phage tail protein # FIG072132 and FIG003673
                     /db_xref="SEED:fig|6666666.356843.peg.20"
                     /translation="MKKPQSLRNALTSAVIHLRENPECLHLFVDEGAVISTLAPSLSWE
                     YRYTLNVIVTDYAGDPNLLMAPILSWLRDNQPDIMANTENREKGFTFEVDILNHTACDI
                     SINLKLTERIQVRADNGHQVVEALSEPGEPDDYWIDRRG"
     CDS             complement(16153..16326)
                     /codon_start=1
                     /product="hypothetical protein"
                     /label=hypothetical protein
                     /db_xref="SEED:fig|6666666.356843.peg.21"
                     /translation="MNYLLERLKEPSTWRGIIMVVAGVFGVQLGADTQALVISAGVTAA
                     GLLGAALPDTWK"
     CDS             complement(16366..16818)
                     /codon_start=1
                     /product="Phage lysin, 1,4-beta-N-acetylmuramidase (EC 
                     3.2.1.17) or lysozyme #Protein S in phage lambda"
                     /EC_number="3.2.1.17"
                     /label=Phage lysin, 1,4-beta-N-acetylmuramidase
                     /db_xref="SEED:fig|6666666.356843.peg.22"
                     /translation="MLAFSEGTANHPLTRNRGYDVIVTGSDGKPEVFTDYRDHPFASGR
                     PAKVFNKQGQRSTAAGRYQQLYRYWPTYKKLLRLPDFSPASQDTLAIQLIRERRALDDV
                     LAGRIACAIVACNNIWASLPGAGYGQREHALDRLLVVYQQSGGKLA"
     CDS             complement(16847..17143)
                     /codon_start=1
                     /product="Phage holin # possibly family II"
                     /label=Phage holin # possibly family II
                     /db_xref="SEED:fig|6666666.356843.peg.23"
                     /translation="MNESDKSIVTLFIIGMLIAVGKVLAGGEPITVRLFLGRVLLGGFV
                     STIAGVALVQFPDLSPLAINGIGAALGIAGYQTIELLIQRRARQLSDKAGRNE"
     CDS             complement(17147..17350)
                     /codon_start=1
                     /product="Phage tail completion protein"
                     /label=Phage tail completion protein
                     /db_xref="SEED:fig|6666666.356843.peg.24"
                     /translation="MQVRTQQHDTVDALCWRYYGRTAGLTEQVLAVNPGLADIGPILPH
                     GLLVELPDVAPVATQETLQLWD"
     CDS             complement(17350..17814)
                     /codon_start=1
                     /product="Phage head completion-stabilization protein"
                     /label=Phage head completion-stabilization protein
                     /db_xref="SEED:fig|6666666.356843.peg.25"
                     /translation="MSFIAPESAPSQPDLIKNTAFWPDLDMAHFRDAMRTDGTVTPPRL
                     RQAVLTAISEVNAELFDWRQRKLADGYTSLAAVPGEQLDGEPERLHLYRRAVWCWARAN
                     LAERYRDYDATATGNKRADALEPAIDDLWRDVRWALSRLQSQPHVIVELI"
     CDS             complement(17906..18568)
                     /codon_start=1
                     /product="Phage terminase, endonuclease subunit"
                     /label=Phage terminase, endonuclease subunit
                     /db_xref="SEED:fig|6666666.356843.peg.26"
                     /translation="MALNPFQRHTRFIQGQQAARTGGTARPLSGYDRMLMQLTEDQIRL
                     KRIQSQEKKAELKRQLLPVYAPWVAGVIAADGTHQDDVLMHVMVWRIDAGDYDGALTIA
                     RHVLRHDWVMPKRYTRTTACTVAEEFADAAMRAFMARQPFDAGLLQTALELTADADMPD
                     QSRARLHKSLGYALRLADHPAPALVNLRRALELDQRCGVKKDIEQLERQLRNAGNGG"
     CDS             complement(18571..19644)
                     /codon_start=1
                     /product="Phage major capsid protein #Fam0066"
                     /label=Phage major capsid protein #Fam0066
                     /db_xref="SEED:fig|6666666.356843.peg.27"
                     /translation="MKKETRFKFNAYLTQLAALNNVPVEDVGTKFTVEPSVSQTLEDKI
                     QESSAFLTMINIVPVDEQSGEVLGLGIGQTVAGTTDTTQKEREPTDPSYIDGSGYKCTQ
                     TNFDTALPYSKIDLWAKFQDFQTRIRNAIVQRQALDRIMIGWNGMKREKTSDRVKYPLL
                     QDVNIGWLEKIRQEAPTHVISNVVDDNGQEISKTIRVGKGGDFDNLDALVMAAVNEKIA
                     VQYQDDTDLVVICGRQLLADKYFPLVNKEQANSEKLAADLIISQKRMGGLQAVRVPFFP
                     ANALLVTRLDNLSIYWQDGTRRRAVIDNPKRDRVENFESVNEAYVVEDYDCTCLVENIA
                     LGEFAESAATDDANAGA"
     CDS             complement(19659..20513)
                     /codon_start=1
                     /product="Phage capsid scaffolding protein # Fam Scf032"
                     /label=Phage capsid scaffolding protein # Fam Scf032
                     /db_xref="SEED:fig|6666666.356843.peg.28"
                     /translation="MMNWSLNMAAKANARRFRIGVEGATTDGRTIERAWLEQMAANYDP
                     AVYTALINMEHIKGYTPDSPFRRYGKVEALETEEIQDGLLSGKLALYAYLAPTDDLIAL
                     TQKGQKLFTSMEVNPDFADTGSAYLVGLAVTDDPASLGTEMLTFSAGARQNPLAARKLS
                     PGNLFTAAEETPLVFEPDDNKPSLFSRISALFAKKQTSDDARFSDVHQAVELVAQEQQQ
                     LAGQVQQHSAQLARLASLEADLQAHKTKLASLKETLSQQDRNSAFRPLSTGGADTATVL
                     TDC"
     CDS             20594..22408
                     /codon_start=1
                     /product="Phage terminase, ATPase subunit"
                     /label=Phage terminase, ATPase subunit
                     /db_xref="SEED:fig|6666666.356843.peg.29"
                     /translation="MGKSGRAGGSGRSLAGMETTAQHTDLDPRRQAMFLWFQGLRIARI
                     AEMLGEKPATVHSWKKRDKWGDYGPLDQMQLTTAARYCQLIMKPVKEGKDFKEIDLLAR
                     QAERHARIGKYNNGGNEADLNPKVANRNSGPRKPPEKNVFTDEQIEKLVDVFHHGMFDY
                     QRHWWEAGNKYTVRNLLKSRQIGATYFFAREALIDALTTGRNQIFLSASKAQAHVFKQY
                     IIEFAREVDVELKGDPMTLPNGSTLYFLGTNARTAQSYHGNLYLDEYFWIPKFQELQKV
                     ASGMALHKQWRQTYFSTPSSLTHSAYPFWSGTLFNRGRAKADRIDIDLTHAHLAPGVLC
                     PDGQYRQIVTVEDAVRGGCNLFDLEQLRLRYSPADYQNLLMCEFIDDLASVFPLSDMQA
                     CMVDSWEVWEDFQPLLIRPFGHYPVWIGYDPAKGTQNGDSAGCVVLAPPRVPGGKFRIL
                     ERHQWRGMDFRAQAEAIKKLTEQYNVTYIGIDSTGVGHGVYQNVKQFFPAAREFVYNPN
                     VKNALVLKAYDVISHRRLEFDAGHTDIAQSFMSIRKAMTASGSRPTYEASRSEEASHAD
                     LAWATMHALFNEPLEGENANSHNIVEIF"
     CDS             22408..23433
                     /codon_start=1
                     /product="Phage-related capsid packaging protein"
                     /label=Phage-related capsid packaging protein
                     /db_xref="SEED:fig|6666666.356843.peg.30"
                     /translation="MAKRRKPQLPATLTAAPAGVEAFSFGDPIPVLDRRELLDYIECVR
                     TDRWYEPPISFEGLARTFRAAVHHSSPIFVKRNILTSTFIPHPLLSQQAFSRFVQDYLV
                     FGNAYLEKRTNRLGGLLSLQPALAKYTRRGLDLDTYWFARYGYNSQPYQFEPRSVFHLM
                     EPDLGQEIYGLPEYLSAIPSALLNESATLFRRKYYLNGSHAGFILYMSDGQQNQEDVNN
                     IRQAMKSAKGPGNFRNLFLYSPNGKPDSVKVIPVSEVAAKDEFLNIKNVSRDDMLAAHR
                     VPPQMMGIIPNNVGGFGDVEKASRVFVRNELISLQKRLEELNDWLGEEVILFSPYDLGT
                     D"
     CDS             complement(23453..24151)
                     /codon_start=1
                     /product="hypothetical protein"
                     /label=hypothetical protein
                     /db_xref="SEED:fig|6666666.356843.peg.31"
                     /translation="MATLVENCPRCGSQKIAFDIKGANCCAAYEESSGNYFFEYEVYCV
                     CRECQKTTMFLCEGINKNQALDSINWSLAFKLTDVVTVKHPITPADLNVEDPPDFLPQH
                     IDAAYKEGAKCLAIGCYNAAATMFRLCLDYATKGLLPDGDEGPAQKIRRSLGLRMEWLF
                     DNNILPEALRELAECVKDDGNDGAHEGILDQAAAEDLEEFTYLFLERLYTEPQRLAEAK
                     ARREGRRKTE"
     CDS             24150..24293
                     /codon_start=1
                     /product="hypothetical protein"
                     /label=hypothetical protein
                     /db_xref="SEED:fig|6666666.356843.peg.32"
                     /translation="MLRFSFILKSDVRIRHNHVLLLIFGSTDFVLRLDARNRGPAAPAR
                     FT"
     CDS             24293..24406
                     /codon_start=1
                     /product="hypothetical protein"
                     /label=hypothetical protein
                     /db_xref="SEED:fig|6666666.356843.peg.33"
                     /translation="MVFMHMHEPAGSAAGLEGIAVFRAVWIMRIHAQKGVF"
     CDS             complement(24443..24631)
                     /codon_start=1
                     /product="hypothetical protein"
                     /label=hypothetical protein
                     /db_xref="SEED:fig|6666666.356843.peg.34"
                     /translation="MDTLEHAQLALVRVQFIAEIALTADCDKKDLQMALATISHLVDVQ
                     LKEQHQAESTPAIGQKN"
     CDS             complement(24744..25415)
                     /codon_start=1
                     /product="Phage antirepressor protein"
                     /label=Phage antirepressor protein
                     /db_xref="SEED:fig|6666666.356843.peg.35"
                     /translation="MKTLPSNDSSHITPEALPSLKYHGVPVITTEALAVLYSADVNRIK
                     VNHSRNSHRFISGKHYYKLEGEALRTFKNRVTKSNPVAFRCVVGKNARSLLLWTERGAA
                     RHAKMLETEQAWDVFEKLEECYFRQSAALPTATASADLSLGFIDDRRVAVEGMTVTQLN
                     ALFSTVEYLQMEMWPHLMAVFPHLNQRYIDTFVTLRSLMFLMRELRNQCRHEAERQIYP
                     S"
     CDS             25569..25859
                     /codon_start=1
                     /product="hypothetical protein"
                     /label=hypothetical protein
                     /db_xref="SEED:fig|6666666.356843.peg.36"
                     /translation="MARKEPQINIRLSEDLKAKLHALAEKNKRSVNAEVVAAIEEALIK
                     DAMNTPALPGAGGMILSARSTDKFYTPREILEEVARMAAEQAVGLERSPKK"
     CDS             complement(25926..26306)
                     /codon_start=1
                     /product="hypothetical protein"
                     /label=hypothetical protein
                     /db_xref="SEED:fig|6666666.356843.peg.37"
                     /translation="MPVTVTVHPDVEFPDTAKQYAGLLQHWKRTDELPDMFGNEGRWEM
                     NRRTMDSQIYKLHIRMPDEVPWKKHKAQIDRHSNHYLVYTRHWLDSDRYQVISIMSPNG
                     HELARTSFLAELERRAEEFQNG"
     CDS             complement(26306..26926)
                     /codon_start=1
                     /product="hypothetical protein"
                     /label=hypothetical protein
                     /db_xref="SEED:fig|6666666.356843.peg.38"
                     /translation="MKAQIKTMTVPVIVSALLASLAPVPAASTVLPTTAIELHKSKRLV
                     PSLTFNLENGQVFLPLSEATAYLQSLNEHKQRILSEAIAQRQAKGSGSLFSNTSQLIKL
                     AQENIDHAVRIKEAIKIALSPEKLSLHYPDADDREEFRTELVKFGRAVATSEYTARDIL
                     SAITQSQPSEKVYHPDSLPAVEDVRAMITAEHKNLGLSAPEFL"
     CDS             complement(27039..29390)
                     /codon_start=1
                     /product="Replication gene A protein"
                     /label=Replication gene A protein
                     /db_xref="SEED:fig|6666666.356843.peg.39"
                     /translation="MSTPRAKQAKSPHTLPDKIKTPEPFIGVYPWNAPRPAIGPDERAL
                     TRDELHQGQAVLSRLHTLPRFLAAKFRTRFEFLKKNQGLRSAFRYLVLTVERRLWPRID
                     AINQRHSIDQHRALDEFDSFRYLPDMSDASLKKFARRIARQVGQAYEVLSDDYLAEHGP
                     DNTVLFTDTAQRELYGKIAGMSRAFNVRPLYWRKYRKGKLTMRDAFSALSRLCNEEWWE
                     RQLKAQRARWREAFLIAIGDVNKDISPYASAQAIRDVRARRLANLDFLKSCEVENTTTG
                     ERFDLIDKVMASISNPEIRRMELMSTIAGIERYAGQQGHVGMFVTITTPSKYHPTRIIG
                     KARRVQFNRSWDKEAFTPKDGQRYLVRVWSLMRTAFKDNDLQVYGMRVVEPHHDGTPHW
                     HMMLFCRKEQRQHIIDIMRRYALKEDGDEPGAWENRFDCKHLNKGGAAGYIAKYIAKNI
                     DGYALDGELDKDTGKPLKDTAAAVTAWAATWRIPQFHPIGIPTMGAYRECRRIRDCSLA
                     EQFDEQVEAVRAAADIGDFAAYIDAQGGANVPRDQQTLRVARTAAANLNAYDEEVQKVI
                     GIYSPRYGFSRVFTTRADEWRIVPKAVDVGGLPLKSGSAAPRSPVNNCGWAGRAPGENR
                     IIEAENRASDGLSGSPVNNCGWAGRAPGENRIIEAENRASDGLSGPLPVPFNWNDSELV
                     ASLAAFARAHTPRHRTLQRPIPPSTDIPRTPSARLSMAQRQQLARLQTALQQKGIQTSR
                     QEREALLRGATLRIEGEEIRYQPPDDGWEW"
     CDS             complement(29491..29715)
                     /codon_start=1
                     /product="Phage protein"
                     /label=Phage protein
                     /db_xref="SEED:fig|6666666.356843.peg.40"
                     /translation="MADHIDISQEQQETLLTAQIQKARMSPGMASQHTCEDCNAPIPEA
                     RRIAVPGVCCCVTCQEIRELKQRHYRGAL"
     CDS             complement(29708..29956)
                     /codon_start=1
                     /product="hypothetical protein"
                     /label=hypothetical protein
                     /db_xref="SEED:fig|6666666.356843.peg.41"
                     /translation="MLTIGEAYHQRLLEETRQHTLTQAINQARLEEKAHAATLFSSRLD
                     QLAAHAQKEHLSSVEIIELLRQEAERIQNQAGEQIDG"
     CDS             complement(30026..30535)
                     /codon_start=1
                     /product="GpB"
                     /label=GpB
                     /db_xref="SEED:fig|6666666.356843.peg.42"
                     /translation="MNQQYAFTAGHLQTMPANLRALIGKHFAGSRWHQSCDFYNHFSER
                     YRVTVCFHAGLNRAMAVYQLEEMEQEVCERVICALDELRKAFAKYRRHEISDSAFIKRL
                     SIGERRTLFFHAGLTATEFNQPIWRIESETCHWRAPLIRALQELLSAFDDAPAILTSVK
                     PEIYTR"
     CDS             complement(30779..30955)
                     /codon_start=1
                     /product="hypothetical protein"
                     /label=hypothetical protein
                     /db_xref="SEED:fig|6666666.356843.peg.43"
                     /translation="MNNLANKLRLAAVLLLAFMIVAVDFTNYLLSAVSDALFVGVLIAV
                     IWTPLTSRQKSQK"
     CDS             complement(30955..31389)
                     /codon_start=1
                     /product="Tellurite resistance protein TerB"
                     /label=Tellurite resistance protein TerB
                     /db_xref="SEED:fig|6666666.356843.peg.44"
                     /translation="MGFFGFGKKVAAAKVELKKVENRDLMEAIIGGCLLVAAADGEIEK
                     EESDKLDQLLRSNPQLAHFGNEITQVIGRFTEQLQAGFRVGRLNILRELDDVKNTAKDA
                     EEVFVNMLTIAEAGGEIEPAEQKVLEEVGRRLGLRVEDYL"
     CDS             31407..31550
                     /codon_start=1
                     /product="hypothetical protein"
                     /label=hypothetical protein
                     /db_xref="SEED:fig|6666666.356843.peg.45"
                     /translation="MVKGFIASPSERRSNKASVVAGMFHHARRVVSLVLLLFRYSMTRQ
                     SR"
     CDS             complement(31519..32025)
                     /codon_start=1
                     /product="Transcriptional regulator"
                     /label=Transcriptional regulator
                     /db_xref="SEED:fig|6666666.356843.peg.46"
                     /translation="MFDYQTAKQPLFDDACRKFANQQNLADVARAVNMRPQMLRNKLNP
                     EQPHKLTCEELLAITDATEDATLLDGLLAQLKCMPAVPMNEANAERITTYVLQATAAMG
                     AVAAESVSTERMSQSRRHAFISSINSGIKYLSLVGLSLQTRLQSNPALASTVDAISGIG
                     ASLNI"
     CDS             complement(32070..32285)
                     /codon_start=1
                     /product="hypothetical protein"
                     /label=hypothetical protein
                     /db_xref="SEED:fig|6666666.356843.peg.47"
                     /translation="MDKPLSITLATPYITLQEFSRLSGVPMSTCYEWVHQGKLPIREKA
                     AKKERVLVNILALTKEADLLSRLPAL"
     CDS             32263..32412
                     /codon_start=1
                     /product="hypothetical protein"
                     /label=hypothetical protein
                     /db_xref="SEED:fig|6666666.356843.peg.48"
                     /translation="MIESGLSIRHPVLLADDSYCQISFVIYRQDKIKNVICQCVKVENV
                     IYAI"
     CDS             32597..32989
                     /codon_start=1
                     /product="Phage immunity"
                     /label=Phage immunity
                     /db_xref="SEED:fig|6666666.356843.peg.49"
                     /translation="MGVGEMRSTLAKPTENSINNDTISLKKIRIVGGKLTDAGKWGVDS
                     TLLDDSVSEPAFIEKGNNAWIADMAVTQVSNGRWLLDIDGDVDVYDVARIPGNRLQVSG
                     NATKFECSIDDVKGVALVVITFERGS"
     CDS             33026..33223
                     /codon_start=1
                     /product="hypothetical protein"
                     /label=hypothetical protein
                     /db_xref="SEED:fig|6666666.356843.peg.50"
                     /translation="MKANAFFLVFFSLSLLPALSYAEKYAAPDELLDEFESIGFNEFEM
                     DEVAVDDGALVIMLDSDNAR"
     CDS             33213..33449
                     /codon_start=1
                     /product="hypothetical protein"
                     /label=hypothetical protein
                     /db_xref="SEED:fig|6666666.356843.peg.51"
                     /translation="MLDSDKVNNKRFHQIIKAVCSVAKKYPDIWDDTPFEKIEVINLYQ
                     SFSVVFYGGNKKCFDMPSGDSYQFIESRKKIRL"
     CDS             33461..33859
                     /codon_start=1
                     /product="hypothetical protein"
                     /label=hypothetical protein
                     /db_xref="SEED:fig|6666666.356843.peg.52"
                     /translation="MSLNKSKLVISLTLSISLFAMPGFAKNTQSPQEKSSKNHTISLKN
                     IRIVMTAKLTKAKKRWGVETTLPDDSVSEPTIIEKGNNAWIADMAVIQVSNGRWLLDID
                     GDVMCMTSPVSPAIGSRSLGMPPNSNAQ"
     CDS             33951..35639
                     /codon_start=1
                     /product="Chromosome segregation ATPase"
                     /label=Chromosome segregation ATPase
                     /db_xref="SEED:fig|6666666.356843.peg.53"
                     /translation="MSTGTFLLLAILFSSPIFLFLWIKEIKKKKVYKKEIDELKIQSQE
                     DSHRASVLAQALEEKSQELSDITKKAEPLWQYQELHDAIVTYENKIRSADITAKNIINN
                     AMSKAESIIDEANHQAELTISNASAEAISITKDARDARLKAKEKLDSANEKANEIINNA
                     HDNATSLIQSAENKAKEIAGAAYEAREFAEKFKDVAQSMKNKIHGYGDEWIIPNQSVLD
                     ELAEAYEFSDSGKELVKARQLTKSLIQSNKAADCDYVEPSRKDTAIKFVLDAFNGKVDT
                     ALSKVKNNNYGKLAQEIKDAFNLVNYNGAAFRSARITDTFLQARLNELKWAVAVHEIML
                     QEKEEQRRIKEQLREEEKARREYEKAIKEAEKEEKAIKQAIEKATKEMLDASEEQRLAL
                     EQQLQELQRKYDEAEAKNQRAISMAQQTRSGHVYVISNIGSFGEDVFKIGMTRRLEPLE
                     RIYELSDASVPFAFDVHAMIYSEDAPSLENNLHKVFKENQLNKVNNRKEFFNVTLKEIK
                     SAIDDMKINAHWTIFAEAKEYRESLALERENISSSENEQDELVVA"
     CDS             35731..36741
                     /codon_start=1
                     /product="Phage integrase"
                     /label=Phage integrase
                     /db_xref="SEED:fig|6666666.356843.peg.54"
                     /translation="MAIRKLPSGKWISETYPEGRAGKRVRKQFTTRGEAAAFERSLKLA
                     GYSIDTSQAEVAGQTLSELVQRWFDMHGRSLSDGEARLRKLQMLCENLNDPIANLFTKA
                     DFAAYRQQRLSGKFGRFDKPVKESTINREHAYLSAVFNELKRLGEWEGGNPLEGVRQYK
                     ESENELAFLYHDDIRLLLAECDASNNPDLGNVVRICLATGARWSEAQGIKQSQVVPYRV
                     TYTNTKGKRNRTVPISQALFQRLPQRRGALFSPCYDAFRQALKRARIELPEGQLTHVLR
                     HTFASHFMMNGGNILVLKEILGHTSIQMTMRYAHFAPDHLDAAVTLNPYDRLETM"
     CDS             36743..37432
                     /codon_start=1
                     /product="5-methylcytosine-specific restriction enzyme A 
                     (EC 3.1.21.-)"
                     /label=5-methylcytosine-specific restriction enzyme A
                     /db_xref="SEED:fig|6666666.356843.peg.55"
                     /translation="MEEKQRVGWSDEELKASVAAYVSMKQKRQAGEKFAKKAIYDDLAG
                     RFGRTAKSFEFRMQNISSVYQDMGRDWLPGLTPATNVGTKISQRIEVFINELDPIGELT
                     DQQFEAQVSRLLTQGVKAKPKGNVAPAQKVRETTVISRDPLVKAYVLQQSNGVCECCAS
                     PAPFQLTDGRPYLEVHHLKPLAEGGSDTVENAVALCPNCHRALHYAVNKDVLREGMYQA
                     LSRLIKE"
     CDS             37438..38019
                     /codon_start=1
                     /product="hypothetical protein"
                     /label=hypothetical protein
                     /db_xref="SEED:fig|6666666.356843.peg.56"
                     /translation="MFSWFKPKHNNREQVADRLRQIETVFAPEGWERRAEIAVGGLSEI
                     GFSKVTHHLLVVSSNGRGVIDCQTGERVARDYEEYGSWYDSLNMTCLGIGPLDGELISI
                     AGLCGGGLPVCNRYGESLEVAAPEWPDEDVYFCPPNKSAFINGHQTGCCRIFRDQILSM
                     GFSWNGEFMAVATSSDVTVWQRQSPLIHGA"
     CDS             38487..38624
                     /codon_start=1
                     /product="hypothetical protein"
                     /label=hypothetical protein
                     /db_xref="SEED:fig|6666666.356843.peg.57"
                     /translation="MYYTPVLYSGIVSMAISKLHIGEWISETCPEGRAGKWICKPFADM
                     "
     CDS             38630..38743
                     /codon_start=1
                     /product="hypothetical protein"
                     /label=hypothetical protein
                     /db_xref="SEED:fig|6666666.356843.peg.58"
                     /translation="MAKAWKLPSWNGRMKTFINLLSAIKLDAPLLSGSAPA"
     CDS             complement(38757..38882)
                     /codon_start=1
                     /product="hypothetical protein"
                     /label=hypothetical protein
                     /db_xref="SEED:fig|6666666.356843.peg.59"
                     /translation="MDETEAALAMCADQVDMVIDCQAKTTVDVSADRLARPSKEE"
     CDS             complement(38896..39336)
                     /codon_start=1
                     /product="Phage spanin Rz #LysB"
                     /label=Phage spanin Rz #LysB
                     /db_xref="SEED:fig|6666666.356843.peg.60"
                     /translation="MKSGMIIAAIIMLLIVGVGVQSWRLHATHQLAEQQAQTLSLQQTA
                     LNEKSTQLKTLTEQAERNNVEQARLRDMAADTQAALSERQKTVARLQHENETLKRWADT
                     DLPADIIRLRQRPALSGGHAYREWLPQTDSLPVSNRQPANQR"
     CDS             complement(39333..39824)
                     /codon_start=1
                     /product="Phage lysin, 1,4-beta-N-acetylmuramidase (EC 
                     3.2.1.17) or lysozyme #Protein S in phage lambda"
                     /EC_number="3.2.1.17"
                     /label=Phage lysin, 1,4-beta-N-acetylmuramidase
                     /db_xref="SEED:fig|6666666.356843.peg.61"
                     /translation="MLNNSPNLIAFLDMLAFSEGTATHPLTRNRGYDVIVTGIDGKPEI
                     FTDYHDHPFANGRPGKIFNKQGQRSTAAGRYQQLYRYWPAYKAQLKLQDFGPDSQDTLA
                     IQLIRERNALEDIRQGRIASAINRCNNIWASLPGAGYGQREHNTARLLDIYQQAGGELA
                     "
     CDS             complement(39814..40125)
                     /codon_start=1
                     /product="Phage holin # possibly family II"
                     /label=Phage holin # possibly family II
                     /db_xref="SEED:fig|6666666.356843.peg.62"
                     /translation="MNETDKSIVSLFIIGTLIAAGKVLAGSEPITLRLFVGRVMLGGFV
                     SMMAGIALVQFPDLSPVAINGIGAALGIAGYQTIELLIQRRVRQLDKQAKSEKSDDAQ"
ORIGIN
        1 gtgactgaac gttttgatgc ccaggctttt ctgaagaccg taaccagtca gcctggggtt
       61 taccgtatgt acgatgccag tgacacggtt atctacgtcg gtaaagctaa ggatctgaag
      121 aaacgccttt ccagttattt tcgtgctcat gttgccagcc gtaaaacaga ggctttggtg
      181 aaaagtattc ggcagatcga tgtaacgatc acgcatactg aaaccgaagc cttgttgctt
      241 gagcacaact atatcaaacg ttatcagccg cgttacaatg tgctgctgcg tgacgacaaa
      301 tcctacccgc tgattttcct tagtggagat acgcatcctc ggttatcggt tcatcgcggc
      361 gctaaacatg ccaaaggcga atactttggc ccgtttccga atggtaatgc cgttcgtgaa
      421 acgttgatgc tgctgcagaa gttattcccc atccgacagt gcgaaaatag cgtttatcgc
      481 aatcgttcgc gtccatgtct gcaatatcag attggccgtt gtttggggcc atgcgttagc
      541 ggcttggtga gcgaggaaga ttatcagcaa caggtcgagt atgtgcgcct ttttctatcg
      601 ggcaaggatc agcaagtgtt gatccgattg gtcgagcgaa tggaggcggc aagccatgcg
      661 ctgaagtttg aagacgccgc ccgtatccgt gatcagattc aggctgttcg tcgcgtgacc
      721 gaaaaacaat ttgtctctgg cgatgatgat gatcttgacg tgatcggtgt ggcattcgat
      781 gcggggatgg catgtgtaca cgtgctcttt attcgtcaag gacaggtttt gggtagccgc
      841 agctattttc ccaaagtgcc tggcgggacg gagctggcgg aagtggtgca gacatttgtc
      901 ggtcagttct atttacaggg tagtgcttcc cgcaccctgc catcggacat tctgctggat
      961 ttttcgctac cggagtacca actgctggcg gaatccctga gcgaacaggc ggggcgaaag
     1021 attcagattc aaacccgccc acgtggtgac cgcgcacgct atcttaaact cgcgcgcacc
     1081 aatgcccata cggcattggc aacgaaattg tctcaacaat caacggttca gcaacgtttg
     1141 acggcacttg cgtccgtgct tgagattgaa aaaatcaacc ggatggaatg tttcgatatc
     1201 agtcatacca tgggtgagca gacggttgct tcctgcgttg tttttaatgc tgatgggccg
     1261 ctgcgctcag agtaccgccg ctacaacatt accggtatca cgccaggtga tgactacgcg
     1321 gctatgaacc aagtacttag gcgccgctat ggcaagtcga ttgatgaaag caagattcca
     1381 gatgtcatcg tgattgatgg cggtaaaggc caattggcgc aggccaagga agtttttgcg
     1441 tcgttgcagg tatcctggga taagaatcgg cctttgctgt tgggcgttgc gaaaggcagt
     1501 gatcgcaaag caggcctgga aacgttgttt tttgaagcga caggcgaggg tgtcgctttg
     1561 cctgctgatt cacccgcatt acatgtgatt caacatattc gcgatgattc ccataaccat
     1621 gctatcagtg gtcaccgtaa acagcgtgcc aaagtcaaaa gcaccagctc actggagact
     1681 attgaagggg tggggccgaa acggcgccag atgctgttga aatacatggg agggctacag
     1741 ccgctgatga atgccagtat cgaagatatc gcccaagtac cgggaatttc gcattcgttg
     1801 gcagaaaaaa tctttcatgc attgaaacac tagaggcaat gtagcaacat aaccctatta
     1861 tctttcgggc cagacagtta cccagacgct atgcgattta atataccaac gtggcttacc
     1921 ctgtttcgtg ttgtgctaat tccatttttt gtattggcat tttatctgcc gtttagctgg
     1981 gcgccgatgg tatgtgccgg catatttgtc tttgccgcgg taaccgactg gtttgatggc
     2041 tttcttgccc ggcgatggaa acaaaccact cgtttcggcg cttttctgga tcctgttgct
     2101 gataaagtca tggtagcggt tgctctggtg ctggtatccg agcattacca ctcttggtgg
     2161 attacgttgc ctgccgcaac gatgattgcg cgtgagatca tcatttctgc attgcgcgaa
     2221 tggatggccg agctgggtaa acgtagcagc gtggcggtat cttggatagg caagattaaa
     2281 accaccgcgc aaatggtgtc tttggtcggt ttgttgtggc gaccagaacg gatggtagag
     2341 gctgccggag tggcggcgct gtatgtggct gccgtgttaa ccttctggtc gatgttccag
     2401 tatttgagcg ctgcctggcg cgatttgctg gaacattgat cgtctcgcct taaaaaacag
     2461 caaacgattc aggtgaggtg ataattttat tgactcggtg cgtcaggtaa gtagaatgca
     2521 ccgcatcgac agcaacacag tttattgaaa ttacttaata aacaaagtgt tctgaaagaa
     2581 gcgggaatag ctcagttggt agagcacgac cttgccaagg tcggggtcgc gagttcgagt
     2641 ctcgtttccc gctccaattt ttacttgtta tcgttaagtt aaggcgcgtt ggcagagtgg
     2701 ccatgcagcg gattgcaaat ccgtccacct cggttcgact ccgggacgcg cctccaaatt
     2761 ctgagcccag atggtggaat cggtagacac aagggattta aaatccctcg gcgttcgcgc
     2821 tgtgcgggtt caagtcccgc tctgggcacc atgcgttaac gccttgtaat ataagaaaat
     2881 aattaaaaga acatgaccgc cacgaggcgg tttttttgtg cctgtaattt ggcaagtggc
     2941 gacaaaatgg cggcagagtg gcgacagcgc ttttcgcggg cgttgataat gacggtttta
     3001 taagccgtaa taaggccgaa tttgaaaaaa gttttattca tgaattgtga ttaaaaattc
     3061 aggacagttt gtccgtttgc tttcggatgc tgtggtacgg aattaatgct ggcaggaaca
     3121 acgattgaac gtataaacgt ttccatcgta ataaaggtat gaccgcagtt gatatttgtg
     3181 cattggttat agcgttcttt cgtatgcgat gtaacttcgt gacttgagcg ggtatgtgct
     3241 gcgtgatggc acaatgggca tctcatcata gtagctatcc tctttgttat attcacaata
     3301 ttctatttaa agttcacaat tttgaatagt ggttattgca tatccaatcc gtcaatcttg
     3361 acttccagct caagtgatgt gacaaaacct cggtcattca atgaatgtgt aacggttgtg
     3421 atagtccaat ccgcctggtc aatctctctt ttaaagccac taactttgac tggtagctct
     3481 ggaaacagat cttcacggcc acgtgccagg tcgatagaga agctcgctac tcctcgttgt
     3541 aatttttccc aatatgactt tgcccaccgt tcagcaaatt ttttagtggg ataagtacgg
     3601 ctcaatacca agacgttttc atcagtaccg agtaagtatt ctccctgttt agggtctggc
     3661 tcttttttct tcttcgttga cgctcgacgc cgccgccgac gtcgctttac tttcacttct
     3721 ttctttttct tcgcttctct ggtgtctagc cagtgggcaa ccaccccggt ataagcgcct
     3781 cggtcagcca gggtaaagcg gtggctatcg ccatcatcac gggtaataat cgcggccggg
     3841 agtggttttc cgctggccgt ttttccctgg ccctgacgca aaaacagtaa tcgcccatcc
     3901 tttacggctg cgatcgcgcc atgctctttc gccaggcgca tcagaaaaga acagtcagac
     3961 tcattagtct ggtcgatatg atcaacttgt tgggccgcca ttgcctcatc cagtgcggca
     4021 gtcagtttgt gccgtgtggc aatctcccgg acgatttcac caacggtagt ttgatgccat
     4081 gacttttccc gtttgatgtt cagtgattga cggaaatccg cacttcttgc ccgtactgtc
     4141 agccggtccg gcgcgccgct gtgttcaatc tcatccacca cgaatgtgcc tttcttcgtc
     4201 agtgaatagc ctttccagcc gagaaaaacg gtgatttgag cgccacgtcg cggcagcatt
     4261 aattgcccgt ctgcatcgtc cagctccaaa tcaagctgat cggcctcaaa gccccggtta
     4321 tcggtgatag ttaatgacat caaccgctta tccagcgttt cggtcacatc cttaccgcta
     4381 atggtgatac ggtaatccgg tacggatgct tgccctgtgc tcatctgtgt cagcagactc
     4441 atgaaaatac ccccttcacg gtatcaattg cctttccggc ggcggtagtc actttatctg
     4501 cgtaccctgt cgcactgtct tgcaaggatg cccactgttc ggacaggctg ccggttacat
     4561 caccgaaacc accgtctact cgttttaagg tgacggtgaa ctcaatgcgc cgggcgctgc
     4621 cgttgaaaaa gaacatgttt cgggtttcgt tcaggctctc aatcacatac atgccgtaaa
     4681 tggtgccggt gccttctatc agcggccacg ctttaccgct ttccgccatc ttctccagca
     4741 tcaataacga taagcggcca ccggtgattt caggcagcag cacgccttgc agcgtcagcg
     4801 tgtcagcatc tggcccgata aactgccagg cggggcgctg gccgatgcgg ctgttagtca
     4861 catgtcgcca gttacgctga cgctgtaact cctgatatgg cacggtttgc aggccaaaca
     4921 cgaacaggcc cagcgccatc atgacgctga cgctcaaatt gatgttgatc atccaattcc
     4981 cccttgatcg ctgtaattgc tgcgtgattt cgccctggca cggcgctccc gttcatccag
     5041 ttggcgggca acttcgcggg cgatatccgt cgcgttctgg cctggctggg tataaatcga
     5101 aatgggtgca ttaacggtaa ccggagcggc ggtggctaac cgcccggcag agtatgcctg
     5161 tccagcactg ctgtactgac tggctggcag gctgaatgga tgcatgggct gtgcaacgag
     5221 tggcgaggcg gcggcaccca gaacggcggc cgccagtgct gcggtgcggc ggcggctggt
     5281 gatgcgcgcc gggccgttga cgatctccgg gccgttctcc ccgactatgc cgaactgacc
     5341 agcaggaata atcccgccgc tgtcatacat gcctgcaaag gggctgtaga ccggcggcgc
     5401 gccccagggg gttgcattgg tggggttaac cggaacggcc gccgcggctt tggcatcctg
     5461 cgctttttgg atcacatcgg ctgatggcag cttgtccgac tcagttttga ccacgcccag
     5521 cttttcaagc agccaggaca ccccggattt cagtgagtcc agcggatgca tgaccttgct
     5581 cagcccatcg gccaggaact ccccgaattt atggcccatt gctgcggcat tattcaactc
     5641 agcagcggac cacttcaccg gctccagtag gtcggtaaat cccttccaca gcgactgaac
     5701 cttctcactc acccatgcaa acaccggttt tagcggctca aacgccgcca caatcggtgc
     5761 agccgctgcc tggaaccctt cgactacacc ggccaggaac gcgttgatcg gctcccagtg
     5821 ctggtaaatt gcgaccccga cagcaacaac tgccgccata aatagcgcaa caggactgag
     5881 taatacccca atgaatgtgc ctacaaacat cagtgctgtg cgtaatagcg caaatggtga
     5941 ggctactagc cacagcagta cgcggcccaa catcgtgaac acagaaccgg tgccaccaaa
     6001 caagccagca aaacgtgcca cgacaccgcc cagtgtgggt aattgcaagc ccaacatccc
     6061 cagactcatt ctcagcagtg atagcggccc cattactgag gcaactacca cgaaaaggat
     6121 accaaccgct gtagcagtga tggcaaaacc cgctgcgagt ttaaacaggt tgccgacaag
     6181 taccgggtgg gttttcacaa agtcgttcag cgccccggcc atctcgccca gttcgtcaat
     6241 taaccgtttc aggtctgggg caactgtcgc gccaatgctt gccattgcgt tggtaaatga
     6301 gccggtggca gcatcccact tattgcccag cgtctgtaat tgcgcgtcta cgcgctcacg
     6361 cagtgatgcc tgttgctcca gcttggcctg ggtttcccta tagccgtcaa tacctttttc
     6421 aatcatgtta ttaacgactt gcgccacttc tgcatcatca ccaaaaattg tagagatgac
     6481 ctcctgcgct tttactgggt tgttcttttg taatgtcgct aattttgcaa actgggcgta
     6541 catcttctca atgccgccaa agtgcccttt accattggtg aaatccagct taacgccctt
     6601 aaagcccgac tctttaagga tgtcattcgc gtcagcgacc ttatccacct tcaggccagc
     6661 ctgaaaaacc ttgcggtagg cgttacctgc tgagccgcct tccatgcctt gttgatcggc
     6721 cataaccagc agaggagcaa aggctttagc agcatcaatg ccttttttct caatgactga
     6781 catggcgctg ccaatcttgg caaaaccgcc tagcatgttg gtcggatcca caccggcgta
     6841 aaatcccttc tggatgatat ccatcagcgg catcatgtct ttttcggctg tgccggtggc
     6901 atcctgcatc ttggcagcaa actctgccgc ctcggtgggt gccatcttca actgcacgcc
     6961 cagataggcc gctgcctcac cagtaccgcc gagaatactt tgtgcggata gcccctgacg
     7021 gcgcagcatg gtcatcatgt tctgaaaatc tgccgttgta ccgggtaacc tgtcgcccag
     7081 cgacacggcc aacgtattga tcttctcaaa ctccgctgac accttggccc ccggccccat
     7141 catggcgcca gccaattgtg tggcggcatc ttctgaatct gcatacgcct tgatcggcgc
     7201 aatcatcggg gcagcggtgg cgatgccggt cgctaccatc gttccaccag taccggccag
     7261 cttgttacgg gcctccagcg ttttttcatg ccgtgattta atcgcgttca gcttctgctg
     7321 gcgttctccc agtcgtttca gcgcttgttg ctgccgctgt agggagtctg tcaccgcctg
     7381 tgcttcactg cgcaattgcc gctgggcatc gcttagcttt ttggtgtcga tacctgatgc
     7441 gttcagtgcc tcacgctggc gttgcacgga tacgcgcagg ccgttgtatt tgtcctgtag
     7501 ttcgttaacc cgctctttgg cttgttgcag caggcgtgcc tgttgggcgg tggggcgttc
     7561 ggtagcggcg aattgcgttg ccagacgagc cgcctcttca cgggcacctt tcaggctgtt
     7621 gctgactacg gcggcctgct tactggcttt acgaaagcca tcaatccgag tggcttgcgt
     7681 gtccagctct ttcaaacggg cctgacttgc tttgatggca gcggatagcc ctttgctacc
     7741 cgcctgtgcc tgacgcaacg gccgggtcag cttgtctacc gcatctaaaa cgacttgcag
     7801 acgcagactg ctattactca tcaccggctc cgcttctcaa tatggcttta tgccgccatg
     7861 tcagcacttc ggttaatgac atcccctcag tgacggcagg cggccagtga aacacggtgg
     7921 cgatgtctgc caccaaatcc tctatagtca gctcagtggg gaatcctgcc gggccgactt
     7981 cggcaacaaa aaagtgacca cctcaacaga cagcgccacc aggtcggccg ggtccagctc
     8041 cagcacctcg gctgccgtca gcgccggagt ggtgacgcgg ggcagtacaa ccatcaccgc
     8101 gttgacgtcc aactccatca gcgcctgaag gcgcacgccg cgcagcgcgc cggatgtggg
     8161 cttgcgaacg gtaatagatt caatcactgc ctcaccgcgt ttcagcggac tatcgagcgt
     8221 gacggccttt tcagtgttca gttcctgcat gtgtttctcc gataaaaaat gtcagtggcc
     8281 gtacagacaa caccgtctgt gctgcagcgc attacagccc gatggcggat cggtgttcgg
     8341 ctagccggtc ctcaccaccg atgttttcaa tcatgttgag aatgtcgatc tcggccagca
     8401 cgtcgccgtt gatggtcagc ttgtagtaag tgcagaccgt agaaattttg gtggtggtct
     8461 tttcgccctg cttggcttcg ccgctgtcga cttctttgtg acggccgcgc agcacaatct
     8521 ctaccgcctg tacttcgccg gtgtcgtcac gctggataga gccagtaaag cgaagttgca
     8581 cgccatcggc ttttgccgtg ccaagttgct tgaagatcag cggctcccag ccgccaatct
     8641 gccattcaca ttccagagcg ccatcatcca gccccatatc gatatcgacc gtgccggaca
     8701 tgccgccgcc acggaatttc tccagtttgc gggtcagttt gggcggcgtg aacgactcga
     8761 ccacccccat aaagttgttc ccgtcattga acaggttcag gtatttcagt gtgcgtggta
     8821 atgccatgtt tcagcccctt agccgctcac ctggccggtg aagtccatca ggtaggtgtc
     8881 ggtgatacgc tggcgtaaca gcaggttttc cagcggtggt accggcgtgt agttgtaatc
     8941 aatggcgagt tttcccgctt tcagcgtgtc tttgctgttc acgctttcat caatccagca
     9001 gtcaccgccc agcaggtagc cctgtgcaac cagctcgcgc agcttggcgc ggatgccttc
     9061 aataatgtcg cgggccaatg agggggtgag cggcttatcg actgcccaca tgtgcgcgtc
     9121 ggccatcgta tcggccagca cctgcgcggt gcgggtgtac gattcaaagg cgaacagcgg
     9181 atcatctgaa caggtgcgac tgccccagaa gcgaaagcca tctttgcgga ttaaggtggt
     9241 cacggcgttc tggttcaaca gccccgcatc cgtggccggg tcttgcaaat cccagaacac
     9301 gtctgccgac aggccggtga cgccgttcac gccgacgtta gacagggttt tatgccagcc
     9361 ggtttgctcg tcgatttttg cacgcaggcc gagtgcgcga gcagtcgccc aggcagtcgc
     9421 ctcggcatct gtggcggtat cccaggctac aaaatccggc cagatcacca tcagttcacg
     9481 ctgactaaaa ttgccccggt aggcgatggc gtctgccacc gttttgcagc cgtaggcact
     9541 gacgtacgcg aaggcacgca ggctctgcgc aacgctcgcc agctcaaccg ccaccgcctt
     9601 gttatcatga cctggcacac cgagaatacg gggcttcacg cctaactgtg cctgcgctgc
     9661 cagcagggct ttcatgccgg ttttcttgcc gtcggcggta acgccgccaa tgatgcttga
     9721 tgtggtttcc gcttcgctct cgccctgtgg cacacgcaca acaacggtaa cgggcttagc
     9781 ctgatcggca atggcatcca acgagcgtgc cagcgtgccg gattcacccg ctttaccgct
     9841 ggccgttagc acatcggtga ttagcactgg tttgttgagg ggaaaggttg ccgcgtcggc
     9901 gtcgtcagcg gtacagacca gcccgacgat ggccgtcgat acagtggtga tagtgcgcgt
     9961 gccgtcgtta atttcggtga cacgcacacc gtgatgatag tcagttgcca tagcagcctc
    10021 cgtaattggg tgtctgctat ggtgtaatga ctgacacaac cgcgcattca ttacgccttg
    10081 tgtcagcgat ggtacaatgc agggttattt ttccgggggc gtgggccagt cgatatctgg
    10141 ggcggcggat gtatcaatgc ggcttaattg caccagatag gttttccatt ccgtcattgc
    10201 tgcctgctcc acatctgttg ctatccccag ctctacagcg taactcagtt cagtaatgcg
    10261 cgccgtggcc gttgcttttc gtgcagcctg ttcctgttgc gccgctgcca ctgcggccgc
    10321 ctgctgggct gcaacatccg ttacccattg ttcaccgttc cacttgtcga actcagtcga
    10381 tggcgccagt agcgtgaggt catcaggtaa ctcaccgagt gccgtcacgg tttgtgcctg
    10441 gccattagtc gtgcggtatg cagtctgccc gcgataatcc gccacagttt cccatgcgct
    10501 gccatctgcc cgtcggcgaa tggcataccc cgctactgct gaggggggaa cgtcagtata
    10561 actgtcagca gggatacccg ttccgcgcat caaaaactcc tcgcttttgc acgtgtactc
    10621 acgggtaacg tgatcggcgt gataaaccgt aatccatccc gcatcgacag ccaggccgtt
    10681 ttcatccagt tcagtaatga tttgttcagc catgttatgc agctctcact atgtagttaa
    10741 aggcgatatt tcgggggcgc gtttcgtcac ctggaaatgt tgttgtgtat gcagtattaa
    10801 cgccgtttcc gtcgacagca tttattggcg tgtcaccacc ggtaattctc gttatcgaat
    10861 acctaattcc aacattgaac ggctgaatac tctgtgactg agccgttagt ataccgcgcc
    10921 ctgaatccac ccccctccca tcatcccagc cacgaataaa ttcaccacgc agatccggca
    10981 acatgcctga tggatagagc tgtgccagcc gtggataacg attcctgtcg aacggctggc
    11041 cgttgcactt gagccaaccg gtcggagcaa tcgcacccgg ccacggcagc ggaatgcccg
    11101 ccagttctgc cccaaaccat gctgatgtaa tggcactgtc gctgttatct ccgcccgcgg
    11161 gagcgttcaa aatcagatgg ctcgacacat acgtggcatg accagcgggc ggggcaatgc
    11221 tgatatcgcc cgagtcatac ataaccagtg ctgagtttgc agctgcgtta cgcatctgca
    11281 cgctgtgtga cgacaactga tatagcaatt gcagtaacgg tgcgccggat tgcgattgca
    11341 tcatcaatcc aatgtctttg accgtttcat tcctcatcaa caacgcagat gcgccgtcgg
    11401 cgacaactga gatcccgcga ataaaactag ggctggcaat cggcgcatac tgcgggtgag
    11461 ggtttgcagc agatacatgc atcatcatca gattgtcagc atgggccttt acttcgattt
    11521 caacactgcc tgtctttgcg tctgtatagt tctttgcatc tcccttagtg ttttcggccc
    11581 gatcatcaat gtaggctttc gtctcagcag ctttagcatc ggtatacgca cgcgttgcca
    11641 gcaccaccga cgggtcgatt ttcagcgtta ccgcgtcagt gctgctgaca atcaaaatca
    11701 tgcgcaccgt ctgcacccgg ccggagcctt cctgtagctg cggcttatag gtttccgggc
    11761 agtttgcgac ggcgatcagg ttacccgcgg cgtcatacag accaatttcc cgaatccacc
    11821 agcccccctc gtcttcagga atcacctgtt cggcaataat ctggttggtg ttggccgggt
    11881 caacgctcaa ggaatttagc ggggcgcggc gccgttcgtt cgtcagccgg gtctgtgccg
    11941 ggtcgggggt cggcagcgcg ccgccgccgt cgcccagtgc catctgggta atttgcaact
    12001 gtcgcccgag cgcggttgcg tttgccagca gtgccgcgcc tttagccgtc agcagtgcga
    12061 aatattttgt tgtcatgcgg tcacgctcac attgtcagac agatgtaccg ccgctgcgtg
    12121 gatttccgca ccggcggtgg taatcgtttc aggaaagcag ggatagacag tcagggcatc
    12181 accgctgtat tgcccggcgc ggattggcat tgccccctga ctatcaaggt ggatagccag
    12241 ccccaagagg tggcggctta ccggcttggc atcggcgatc agccgctcca gctccagata
    12301 ggtttcttcg gtaatgccgc tgttctgcac gccgatatcc agccggaagg taccgggcgt
    12361 gccgccagcc tgccaccact ctgtaatgcg gatcagatag ccgaacggct ccaccacccg
    12421 gcgcagtgct gacagagtgc ctttatggcg gtggataaaa aacgcatcct tgatcacctg
    12481 acgtttcacg gcctccggcc agttctcatc ccagcggtca acagaaaacg cccacgccag
    12541 atacggcaga aacgacaccg ggcaggtatc ggggttccat acctgacgga taggcaccga
    12601 cagcgcactg atatcaccgc aggccgccgc cagacggcgt tcaagcgcag atgaccccgg
    12661 cggtaacagg ctgttattca tcattacccc cgatggtgac ctgatagccg gtgcagtagg
    12721 cggcctgggt atcgtccagc accacatcca tcggcggtga atccagttct acccgctgca
    12781 ctccctcgac gtgcagcgcg gcatagagtg cagagcggcg tatatcgcgg ccgagtcgcc
    12841 gctgggcgtt gatgtatgcg attaacctgg cttccgccgc ctggcgtatc ggctcggctt
    12901 ccgggccggg gtagagatat aaccgagccg tgactgaata gggcaccacg tgggccgact
    12961 gtacagtgac ccggtcagcc actggtcgca ccgattcatc attgagggcg tctgtcacgg
    13021 cggtcagtag ctcatcagac gcggtgccgt cgccctcgcg tgacagcacc gttacggtaa
    13081 ccgctgccgg tgaggggctg attgctgtag catccgccac cttgccatca gcgctcagcg
    13141 cgtggaacgt gtaggcaccg gtcggaccgg caacactcag cccctcgaat gcagccggga
    13201 tacgctggcg taagtcgtcg tcactctcca gcactgcatc taccggcggc acggttgttt
    13261 catccgccgg tgttaccgtc aggcgctcaa cgttgtaatt ggcggctaac tggtcaagat
    13321 cgttacccag cgcatacgcc accatgcacg cctgcgccgc ttcgttgata cgctgtagca
    13381 gcaatatttc ccggtaggcg ttttcctgta gcagtttgac caccggctct gattctaacg
    13441 ccagcgtggc ggctaccgcg tcgcgttcat cggccgggaa caacgccaga tacgccgctt
    13501 tgcgagccgt cagcacggtt tcaaaatccg gtaccgtgac gatatccggc gcgggcagtt
    13561 gcgacaggtc gataacactc atacatcact ccccagagaa acggacagag cggcagactg
    13621 gccgctgacc agttcgcctg tcaggtcggc caccatgcgg ccgtccagcg tcgtcgtcag
    13681 gtcaatcgcg gttaattgca aacgcggttc ccagcggtgc agcgcgccat aaatcgctgc
    13741 cattacctgc aaacgggtgg cggcgttctg cggttggtcc agcaactcgg aaagtaacga
    13801 gccgtattca cgacgcgcca gacgcgagcc gataggggtt agcagaatgt cgcggattga
    13861 ttgccgcagg tgcgccatct cgctgatccg tccgccggtc tgttgattca tgcctaagta
    13921 gcgcatcaga ccggccctcc gctattgctg ccgccgctct gtacaccgcc gtgctgatgg
    13981 gtatgcacga ctacaccgtt agacgacagg ctgccgttct gctgggtgac cgggccgttg
    14041 atagtcactg ccgcgttgag cgtcagcgta tccgcgttca gcacaacgct ttttaccccg
    14101 ttaatcagca actgtccgct gtccggttcg tactcaaagc gtgcaccgtc tgggaatacc
    14161 gtcaccagtg catcatccga ggtggacggc ggcgggttgt cgtttgaaaa aatggcgggt
    14221 agcacaaagg cggtagtcaa ttcgccgccg atcgccagca gcaacacctg ttcccccggc
    14281 gagggtttcc accaggtgcg ggcgcgcccg gcgcgggtag tcagccagtt caaccagccg
    14341 gtttgtaatt cacccgtttg aacccggcac agccagttat ctgggtcaac gtcgataacg
    14401 acgccgaccc ggatcaggtt cagcaatagg cgcatgattt cggtagtttg tgcgttcatg
    14461 gggagagaat cccatgagat aattttgata actaacagtt ggttttgtat ggctaatcaa
    14521 acaaaaatca cgctaccatt gttatttttc agttggttgc tttttagctt tggaaaatta
    14581 tggatacgat aaaacaggta aatgagattg taggtgctcc actgtggggg gtgttatttc
    14641 ctatcgttgt ttattttttt agaattttaa ttaagaaatt taattcagtc cccaaagaga
    14701 aagagagttt actactcatt gatggattga agccttggat gttagggttt ggttattcat
    14761 tctcagcaac aaaggcatat agagccaata acaaaataga ttatttctct gctgtaatat
    14821 tcactgtggt ttttattgtc tttctagtgt cacttgctac ctttgttaat cagcatgcct
    14881 tgaaggtgcc aagcggttgg gcagatttat attatgaaaa tgcgggtgag agggagatgt
    14941 ttctgttatc tcaagataaa gcgagaaatg tgtatggtgg taaaatgtgg gggcttgatg
    15001 tatcagtatg caaaagaaac aatatcgagc tatcaaatga gcttcatata tccaaagagc
    15061 ttattgagat tatttgtaat agtatagggc acaaggagta tttcgatgaa attgcaagaa
    15121 aaattgagga aactaatatt ttaaaagtgg ttatatatgt ttcttatttt gctttcttgc
    15181 ttgctttcac atatgtgata attgatatgt gggttagtct ttatattaga agtaagattt
    15241 ttaagtacta tgaaaaggag aaggctaaag cctacgaata tttaacgtaa aagcgttgtt
    15301 aacttagcta ataaagcgtt agatacagca ctatccatcc ccaacaactg ccgcgccggg
    15361 tatttcacca cggcgccgcg ctctcgcact ttatcccgca ggccataatg atgcacccgc
    15421 gccatgcgct ggacattgcc ggtaaaaccg acctcggcca cgttggccgt agcggtcgct
    15481 tttaggtatt tggcggtgcg tagtttacgg aacatctgcc gccggatgcg gccgggcttc
    15541 tcgcgtggtg acacccggcg cggctcaaat gcgctgccgt ccgggttctg ttgcaggcgg
    15601 atgcggtctt gctggcgttt gcgtaagtcg cgtgccactt cacgcagcag ggttttgcgt
    15661 tctgctggcg tgagttttgc cagtaaggcc gccagccacc cctcaacgtg ttgaaagtca
    15721 tccacggcga tctatccagt aatcgtctgg ctcaccgggt tctgacaggg cttcgaccac
    15781 ctgatgaccg ttatcggctc gcacctgaat gcgttcggtc agtttaaggt taatgctgat
    15841 gtcacacgcg gtatggttga gaatatcgac ttcaaaggta aagccttttt cccggttctc
    15901 cgtgttggcc atgatatcgg gttggttatc tctcagccag ctcaggatag gggccatcag
    15961 cagattcgga tctccggcgt aatccgtcac gatgacattc agggtgtagc gatattccca
    16021 ggagagcgaa ggggccagtg tactgatcac tgcgccctca tccacaaata agtgcaggca
    16081 ctccgggttc tcccgcagat ggatcacggc gcttgtcagt gcattacgga gtgactgcgg
    16141 ttttttcatc ggttatttcc aggtatccgg caacgccgca cccagtagcc cagcagccgt
    16201 gacaccggcg gagataacca gcgcctgggt gtcggcaccc agttgtacgc caaacacccc
    16261 agccactacc ataatgatac cgcgccaggt ggaaggttct ttcagtcttt caagtagata
    16321 gttcataacg acctcatgtt gttgtctgtg ataggtgtga gaggtttacg ccagctttcc
    16381 gcctgattgc tggtacacca ccagcagacg atcaagggcg tgttcgcgct ggccgtaacc
    16441 cgcgccgggc aacgatgccc agatgttatt gcaggcgacg atcgcgcagg cgatacgccc
    16501 ggccagtacg tcatccagcg cccggcgctc acggataagc tgaatcgcca gcgtatcctg
    16561 tgatgccggg ctgaaatccg gcaggcgtaa cagctttttg tacgtcggcc agtagcggta
    16621 caactgctgg taacgcccgg cggcggtgga gcgctggccc tgtttgttaa acactttcgc
    16681 cggccggcca ctagcgaacg gatgatcacg gtagtcggta aaaacctccg gcttgccgtc
    16741 tgaaccggtc acaatcacgt cgtagcctcg gttacgggtc agcgggtggt tggccgttcc
    16801 ttcagaaaac gccagcatgt ccaggaaccc ctgcaggtta gggtgattat tcattgcgac
    16861 ccgccttatc gctcagttgc ctggcacgcc gttggatcag cagttcgatg gtttgataac
    16921 ccgcaatacc caatgccgcg ccgatgccgt taatggcaag cggtgacagg tcgggaaatt
    16981 gcaccagtgc tacaccggct atcgtagaga caaagccgcc cagcagaaca cggccgagga
    17041 atagccgcac ggtgataggc tcaccaccgg ccagcacctt gccgacggca attaacatgc
    17101 cgatgatgaa cagcgtcaca atacttttat cactttcatt catacgttag tcccagagtt
    17161 gaagggtttc ttgcgtggcg accggtgcca cgtccggcag ttcgaccaac aacccgtgcg
    17221 gcaggatcgg gccgatatca gccagaccgg gattcaccgc taatacctgc tcggtcagcc
    17281 ctgccgtgcg gccgtagtaa cgccagcaca gcgcgtctac ggtgtcgtgt tgctgcgtcc
    17341 gtacctgcat taaatcagct cgacaatcac atgcggttgc gattgcagac ggctcaatgc
    17401 ccagcgaaca tcccgccaca ggtcatcgat cgcaggctcc agcgcatcgg ctcgcttgtt
    17461 accggtggct gtggcgtcat agtcacggta ccgctctgcc agattggccc gcgcccagca
    17521 ccacacggcg cgacggtaga ggtgcaggcg ctccggctcg ccgtccagtt gctcaccggg
    17581 tacggcggcg agtgaggtat acccgtcagc cagtttgcgt tgccgccagt cgaacagctc
    17641 cgcattgacc tcagaaatgg cggttagtac tgcctgccgc agccggggcg gtgtcaccgt
    17701 gccgtcagtg cgcatcgcat cacggaagtg ggccatatcc agatcgggcc aaaaggcggt
    17761 gtttttaatc aggtccggct gtgagggcgc ggactcaggc gcaataaagc tcatggcatc
    17821 ctcaaatggg tgggcggtgg acggggtatt gatacggcta atgcctgtcg ctaccccgtg
    17881 ccgcccggtg cgtgggcacg ttcggttatc cgccgtttcc ggcgttgcgc agttgtcgct
    17941 ccaactgctc aatgtctttt ttcacgccac accgttgatc cagctccagc gcccgccgca
    18001 ggttgaccag tgccggtgcc gggtgatcgg caagtcgcaa cgcatacccc aatgatttgt
    18061 gcagccgggc gcgagattgg tctggcatat cagcatcagc cgtaagttcc agcgctgttt
    18121 gcagcaaccc ggcatcgaac ggctgacgtg ccatgaatgc ccgcatcgcg gcgtcggcga
    18181 actcttccgc cacggtacag gcagtggttc gggtatagcg tttgggcatg acccaatcat
    18241 ggcgcagcac atggcgagca atcgtcagcg ccccgtcgta gtcgcccgca tcaatacgcc
    18301 agaccatgac atgcatcagc acatcgtcct gatgcgtacc gtcagcggcg atcacgcctg
    18361 ccacccaagg cgcgtagaca ggtagcaact ggcgtttcag ctcggctttt ttctcctgag
    18421 actgaatgcg tttgaggcgg atctggtctt cggtgagttg catcaacatg cggtcatagc
    18481 cggacagtgg gcgcgcagtg ccgccggttc gggcggcctg ttgcccctga ataaaccggg
    18541 tgtgacgctg gaatggatta agcgccatca ttacgccccg gcgttggcgt catcggtggc
    18601 agcgctttca gcaaactcac ccagcgcgat gttctccacc agacacgtgc agtcgtagtc
    18661 ttccaccacg taggcttcat tgaccgattc gaaattctcc acgcggtcgc gtttcggatt
    18721 atcgataacc gcacgacgac gggtgccgtc ctgccagtag atagagaggt tgtccagccg
    18781 tgttaccagc agtgcattgg ccgggaagaa gggcacgcgc actgcctgca atccgcccat
    18841 gcgtttctgg ctgataatca ggtctgctgc cagcttctcg ctgttcgcct gctctttgtt
    18901 gaccagtggg aaatacttgt cagccagcaa ctgacggcca caaatcacca ccaagtcggt
    18961 gtcgtcctgg tattgcacgg cgattttttc atttaccgct gccatcacca gcgcgtcgag
    19021 gttgtcaaag tcgccacctt tgccgacccg gattgttttg gaaatctcct ggccgttgtc
    19081 atccacaaca ttgctgatga cgtgggttgg ggcttcctgg cggatttttt ccagccagcc
    19141 aatattcaca tcctgcagca gcgggtattt cacacggtcg gatgttttct cgcgtttcat
    19201 accattccag ccgatcatga tgcggtccaa cgcctgacgc tggacaatcg cgttgcgaat
    19261 gcgggtctga aaatcctgga acttagccca caggtcgatt ttgctgtagg gcaaggcggt
    19321 atcgaaattg gtctgagtac acttgtagcc gctgccgtcg atgtaactcg ggtcggtcgg
    19381 ctcacgctct ttctgcgtcg tgtccgtggt tcctgccacc gtctgaccaa tacccaggcc
    19441 cagcacttcg ccggattgtt catccaccgg cacgatatta atcatggtca gaaacgcgga
    19501 tgactcctgg atcttgtctt ccagtgtctg gctgaccgac ggctctaccg tgaacttggt
    19561 gccgacatct tccactggga cgttgttcag ggcggccaat tgcgtcaggt aggcgttaaa
    19621 tttaaaacgg gtctctttct tcatcgggtc tgagttcctt agcaatcggt gagaacggtc
    19681 gcggtatctg caccgccggt ggacaacggg cgaaatgctg agttgcggtc ctgctggctc
    19741 aaggtttctt tcaggctcgc cagtttggtt ttatgcgcct gcaggtcggc ttccagcgag
    19801 gccagtcggg ccagttgcgc gctgtgttgc tgtacctgcc cggcaagttg ctgttgttcc
    19861 tgtgccacca gctccaccgc ctgatgcaca tcactgaatc gcgcatcgtc tgaggtttgt
    19921 tttttagcga acagcgcaga gatacggctg aataacgatg gcttgttatc gtcgggctca
    19981 aagaccagcg gggtttcttc ggcggcggta aacaggttgc ccggtgacag cttgcgggcg
    20041 gccagcggat tttgtctggc acccgcgcta aaggtcagca tttcagtacc gaggcttgcc
    20101 gggtcatcgg taaccgccag gccaaccaga tacgcagagc cggtgtcggc aaaatccggg
    20161 ttgacttcca tcgacgtgaa cagcttttgc cctttttggg tgagggcgat caggtcatca
    20221 gtcggggcga ggtaggcata cagcgccagc ttgccgctta gcaggccgtc ttgaatctct
    20281 tcggtttcca gcgcctcaac tttgccgtaa cggcgaaatg ggctgtccgg ggtatagcct
    20341 ttgatgtgct ccatgttgat cagcgcggta tagaccgccg gatcatagtt ggcggccatc
    20401 tgctccagcc aggcacgctc aatcgtgcgg ccgtcagtgg tggccccttc cacgccaatt
    20461 cggaatcgac gtgcgtttgc tttcgctgcc atgttcaggc tccagttcat catcaggaca
    20521 atcagagagc ctttagggtg cggtgacagt aggggaagag acaacgcggc ggcattgtgc
    20581 gccagacagc acaatgggca agagcggcag agcaggcggg tcaggccgta gtcttgcggg
    20641 catggaaacg acagcgcaac acaccgacct cgacccccgc cgtcaggcga tgtttttatg
    20701 gtttcaggga ttacgcatcg cccgcattgc cgaaatgctg ggggagaaac ctgcgaccgt
    20761 tcatagctgg aagaagcgcg acaagtgggg cgactacggc ccacttgacc aaatgcagct
    20821 caccacggcg gcgcgctatt gccagctcat catgaagccg gtcaaagagg ggaaagactt
    20881 taaggaaatc gacctgctgg cccggcaggc cgaacgacac gcccgcatcg gtaaatataa
    20941 caacggcggc aacgaggccg acctaaaccc caaggtggcg aaccgcaaca gcggcccgcg
    21001 taagccaccg gaaaaaaacg ttttcaccga tgaacagata gagaaactgg tcgatgtatt
    21061 ccatcacggc atgttcgact atcagcggca ctggtgggaa gccggtaata aatacaccgt
    21121 tcgcaacctg ctgaaatccc gccaaattgg cgcgacctac ttttttgccc gcgaggcgct
    21181 gattgatgcg ttgactacgg gccgcaacca gatatttctg tcagccagca aggcgcaggc
    21241 gcacgtattc aagcaataca tcattgagtt tgcgcgtgag gtggatgtcg agctgaaagg
    21301 cgacccgatg acgttgccca atggttcaac cctgtatttt ctcggtacca atgcccgcac
    21361 cgcccagagc taccacggca acctgtatct ggacgagtat ttctggatcc ccaaatttca
    21421 ggaattgcaa aaagtggcgt cagggatggc gttacacaaa cagtggcgac agacctattt
    21481 ttccacgcca tccagcctga cccacagcgc ctatccattc tggtctggca ccctgtttaa
    21541 ccggggccgc gccaaggccg accgtatcga cattgacctg acgcacgcgc atttggcccc
    21601 cggtgtgttg tgtccagacg ggcaataccg gcagatagtg acagtagaag acgctgtgcg
    21661 cggcggctgc aacctgttcg acctggaaca gttgcgcctg cgctacagcc cggccgacta
    21721 tcaaaacctg ctgatgtgcg agtttatcga cgacctggca tccgtgtttc cgctctcgga
    21781 tatgcaggcg tgcatggtgg acagttggga ggtttgggaa gactttcagc cgctgcttat
    21841 ccggcctttc gggcattatc cggtatggat tggttatgac ccggccaaag gcacccaaaa
    21901 cggtgacagt gccggttgcg tggtattagc tccaccgcgt gtgccgggcg gtaaattccg
    21961 catccttgag cgccaccagt ggcgtggtat ggattttcgc gcccaggcgg aagccatcaa
    22021 aaaactgacc gagcagtaca acgtgacgta tatcggtatc gattcaaccg gcgtcggcca
    22081 cggcgtctac cagaacgtga aacagttttt cccggcagcg cgggaattcg tctacaaccc
    22141 gaacgtcaaa aacgccctgg tgttgaaagc ctatgacgtg atcagccacc ggcggctgga
    22201 gttcgatgcc ggtcataccg acattgccca atcctttatg tccatccgca aagccatgac
    22261 cgccagcggc agccgaccaa cctatgaggc gagccgcagc gaagaagcca gccatgcaga
    22321 cctggcctgg gccaccatgc acgccttgtt taatgaaccg ctggaaggtg agaacgccaa
    22381 cagccataac atcgtggaga ttttctaatg gcgaaacgcc gcaaaccaca actgcccgca
    22441 acgctcaccg ccgcccctgc gggtgtggaa gccttttcct ttggtgaccc gatcccggtg
    22501 ctcgaccggc gcgagttgct ggactatatc gaatgcgtgc gcaccgatcg ctggtatgaa
    22561 ccgccaatca gttttgaagg actggcccgg acgttccgag cagcggtaca ccacagctcg
    22621 ccgattttcg tgaagcgcaa catcctgacc agcaccttta ttccgcaccc gctgttaagc
    22681 cagcaggcat tcagccggtt tgtgcaggat tatctggtgt tcggcaatgc ttacctggag
    22741 aagcgtacca accgcctcgg cggcttgctg tcactacaac cggccctggc gaaatacacc
    22801 cggcgcgggc tggatttgga cacctactgg tttgctcgct acggctacaa cagccaaccg
    22861 tatcagtttg aaccgcgcag cgtgtttcac ctgatggagc ctgacctggg gcaagaaatt
    22921 tatggtttgc cggaatacct gtccgccatt ccgtcggcac tgttgaacga gtccgccacg
    22981 ttattccggc gtaagtatta cctgaacggc agtcacgcag gttttatcct gtacatgagc
    23041 gatggccagc agaatcagga agacgtgaac aacatccgcc aggccatgaa aagcgccaaa
    23101 gggccgggca actttcgcaa tctgtttttg tactcaccga acggcaagcc ggattcggtg
    23161 aaggtgatcc cggtatccga agtggcggcc aaagacgagt tcctgaacat caagaacgtc
    23221 agccgtgatg acatgctggc cgcgcaccgc gtaccgccgc aaatgatggg gattatccca
    23281 aataatgtcg ggggatttgg ggatgtggaa aaggccagtc gcgtctttgt tcgtaacgag
    23341 ttaatttcat tacaaaagcg tcttgaagag ttaaacgact ggctcggaga agaggttatt
    23401 cttttttcac cttacgacct tggcaccgat taatgggtgg ccctcgggat tactactctg
    23461 tttttctacg tccttcacgt cttgctttgg cttcagcaag acgttgaggt tcggtataaa
    23521 gtctctcaag aaacagataa gtaaactctt caagatcttc tgccgccgct tggtctaaaa
    23581 tgccttcgtg tgctccatca ttaccatcat cttttacaca ctcagctaat tctctcagtg
    23641 cttcaggtaa tatgttgtta tcaaacaacc attccatcct taatcctaaa cttcttctta
    23701 tcttctgtgc tggcccctca tcaccatcgg ggagtaatcc cttagttgca taatcaagac
    23761 aaagcctaaa catagttgcg gccgcattgt agcagccaat cgctaaacat tttgctcctt
    23821 ctttgtaagc agcatcgata tgctgtggta gaaagtcagg tgggtcttca acattaagat
    23881 cagcaggggt tattggatgc ttgactgtaa caacatccgt gagtttgaaa gcaagagacc
    23941 aattgattga gtccagtgct tggtttttat taatgccctc gcaaaggaac attgtggttt
    24001 tttggcattc tctgcataca caatacactt catattcaaa aaaataatta ccagaagatt
    24061 cctcatatgc ggcacagcaa tttgcccctt ttatatcaaa cgctattttc tgtgagccac
    24121 atcttgggca attttcaacc agagttgcca tgctgcgatt ctcctttatt ctaaaaagtg
    24181 atgtcaggat tcgacacaat catgttctgt tacttatttt tggtagtaca gattttgttt
    24241 taaggcttga tgcgcgcaat cgtggccccg ccgcgcctgc ccgcttcacg tagtggtttt
    24301 catgcatatg catgaaccgg ccggaagcgc ggcagggctg gaagggattg cggttttccg
    24361 tgctgtctgg atcatgcgga tccatgcaca gaaaggcgtt ttttaggcta gccgattatg
    24421 caccggatag cgagacgatc agttaatttt tctgacctat agcgggagtg ctctctgcct
    24481 ggtgttgttc tttgagttgt acgtcaacca ggtgagaaat agtagcaagg gccatttgca
    24541 ggtctttttt atcgcagtca gccgttaacg ctatctcagc gataaattgc actcgaacca
    24601 gtgcaagctg tgcgtgttct aaggtgtcca tatctacctc tatactgtat ttatatacag
    24661 taaattacaa aatgtaatta tcgtcaatag gttgcgtaaa gagataggaa agaagcccag
    24721 ttgctgggct tctcttgtca tcatcaggac gggtaaatct ggcgttccgc ttcgtgcctg
    24781 cattggtttc gcagttcgcg cattaagaac atcagactac gcagcgtaac aaaggtatcg
    24841 atatagcgct gatttagatg cgggaatacg gccatcagat gcggccacat ctccatctgt
    24901 aagtattcaa cggtactaaa cagtgcgtta agttgcgtta ctgtcatacc ttcaaccgcg
    24961 acccggcgat cgtcgataaa acctaacgat aaatccgcgg atgccgtggc ggttggtagc
    25021 gctgctgatt ggcggaagta gcactcttct aacttttcga atacatccca ggcttgctct
    25081 gtttccagca tttttgcatg acgtgcagcg ccgcgctctg tccagaggag taaacttctg
    25141 gcgttcttgc caaccacgca tctgaatgca acagggttac ttttggtaac cctgttctta
    25201 aacgttcgca gcgcttcccc ttccaacttg taataatgtt taccagatat aaaccgatgg
    25261 ctatttcttg aatgatttac cttgatgcgg tttacatccg cgctatacaa aacggccagc
    25321 gcctcagtgg tgatgacagg tacgccgtga tatttaagtg aaggtagcgc ttctggcgtg
    25381 atgtgtgatg agtcatttga tggtagagtt ttcatgttcg ttttccttgc ctggatgcgg
    25441 acgattcaga agccccggct attgcgagta gtcggggctt cgccatgttt atggtatcac
    25501 cgttatacca ttcaaagcat attagcacgg tgctatcatg tcaataaaca tgcatggggg
    25561 agaaccagat ggctcggaaa gaacctcaaa taaacatccg tctttcggaa gacctaaagg
    25621 caaagttgca cgctttggct gagaaaaata agcgttcggt taatgcggag gttgttgcag
    25681 ctatcgaaga agcgctgatt aaagatgcga tgaatacgcc agcattaccg ggggctggag
    25741 ggatgatttt gtctgcacga tcaacagata aattttatac gccaagagaa attttagagg
    25801 aagtggcacg gatggccgca gaacaggcgg ttggtttgga acgctcccca aaaaaataat
    25861 cgaattagtc ctgtagttaa ccttaaccct accattctca gccgtcgtcc ggcggctgaa
    25921 caccatcagc cgttttggaa ctcttccgcc cggcgttcta actcagcaag aaaagaggtg
    25981 cgcgccagtt cgtgcccgtt ggggctcata atgctgatca cctgataacg atcgctatcc
    26041 aaccagtggc gggtatatac cagatagtgg ttagaatgcc ggtctatctg tgctttatgc
    26101 ttcttccacg gcacctcatc tggcatacgg atgtgaagtt tatagatttg ggaatccata
    26161 gtgcgtcggt tcatttccca acgcccttcg ttgccaaaca tatccggtaa ttcgtcggta
    26221 cgtttccaat gctgaagtaa tcctgcgtat tgcttggcgg tatcaggaaa ctctacatct
    26281 gggtgaacgg taacggtgac tggcattaca aaaattccgg tgccgataag cccagatttt
    26341 tgtgttcagc ggtgatcatg gcccgaacgt cttcgacagc cggtaacgag tcagggtgat
    26401 aaactttctc tgatggctgg ctctgtgtta tcgcggaaag aatatctcgt gcagtgtatt
    26461 cggatgtagc cacggcgcgg ccaaacttca ccaactcagt acggaattct tcacggtcat
    26521 ccgcatcggg gtagtgcaac gatagctttt caggtgaaag cgctatcttg atcgcttctt
    26581 tgatgcgaac ggcatgatca atattctctt gtgccagttt gataagctga ctggtattgc
    26641 tgaacaggct gccgctccct ttagcttgtc gctgtgcaat cgcttcggaa agtatgcgtt
    26701 gtttgtgctc gttcaggctt tgcagataag ccgtggcttc ggacaatggc aaaaatacct
    26761 gtccgttttc caggttgaac gtcaatgaag ggacgagcct tttcgattta tgtaactcga
    26821 tggctgttgt gggtaaaacc gtactggccg caggcacagg cgctaaagac gccagtaatg
    26881 ccgagacaat taccggaacc gtcattgttt taatctgtgc tttcataacc acaaccttca
    26941 actttcagaa aacgacactg ttatgccgga gtgcctcttt gacaaccgac ctataggcca
    27001 atagtagctt agaataccat caatttacag atgcgtgctc accactccca gccgtcatcc
    27061 ggcggctgat agcggatctc ttcaccctct atccgtaatg ttgcccctct tagcagtgct
    27121 tcccgttcct ggcggctggt ctggatgcct ttttgctgta gtgccgtttg caatcgggcc
    27181 agttgctggc gttgtgccat gctcaaccgg gcagacggcg tgcgcgggat gtccgttgag
    27241 ggaggaatag gccgttgtaa tgtgcgatgt cgtggcgtgt gcgccctggc aaacgcagcc
    27301 agcgacgcga caagctcact atcattccag ttgaaaggca ccggaagagg gccagaaagt
    27361 ccgtcagaag cccgattttc cgcctcaata atgcgatttt cccccggcgc tcgacctgcc
    27421 cacccacagt tattgacagg actcccagaa agtccgtcag aagcccgatt ttccgcctca
    27481 ataatgcgat tttcccccgg cgctcgacct gcccacccac agttattgac aggactccga
    27541 ggcgcggcag agccgctttt taacggcaac cccccaacgt caacggcttt aggaacaatg
    27601 cgccattcgt cggcacgggt ggtaaatacg cgggaaaaac cataacgcgg cgagtaaatc
    27661 ccgattacct tctgcacttc ttcatcgtag gcgttgagat tggcggcggc tgtccgggcg
    27721 acccgtagcg tttgctggtc gcgggggaca ttagcaccgc cctgagcgtc aatgtaggcg
    27781 gcaaagtcgc cgatgtcagc ggcagcacga acagcctcca cttgttcgtc aaactgttcg
    27841 gctagcgagc aatcacggat acgccgacat tcgcggtaag cgcccattgt cggaataccg
    27901 ataggatgga attgtgggat tcgccaggtg gccgcccagg cggttaccgc tgctgcagta
    27961 tctttcagcg gcttgccggt gtctttgtcc agttcgccat ccagcgcgta gccatcaatg
    28021 tttttggcga tgtacttggc gatatacccg gccgcgccgc ctttgttcag gtgcttgcag
    28081 tcaaagcggt tttcccatgc gcccggttcg tctccatcct ctttcaaggc ataacggcgc
    28141 atgatgtcga taatgtgctg gcgttgctct ttgcggcaaa aaagcatcat atgccagtgc
    28201 ggtgtgccat cgtggtgagg ttcaaccacg cgcataccat aaacctgaag gtcgttgtcc
    28261 ttaaaggcag tacgcatcag gctccacact cgcaccagat agcgctggcc gtctttcggg
    28321 gtgaaggctt ctttgtccca gcttcggttg aactgaacac ggcgggcctt accgatgatg
    28381 cgagtagggt gatacttgga aggcgtcgtg attgtcacaa acatgccgac gtggccttgc
    28441 tgaccggcgt agcgttcaat gcctgcaatg gtgctcatca gctccatgcg gcggatctcc
    28501 gggttggata tgctcgccat cactttgtct atcaggtcga agcgctcccc ggtggtggtg
    28561 ttctccacct cgcagctttt cagaaaatcg aggttggcca ggcggcgggc gcgcacgtca
    28621 cgtattgcct gagcgctggc ataaggtgag atatctttgt tgacgtcgcc gatcgcaatc
    28681 aggaacgctt cacgccagcg ggcacgctgg gctttcaatt ggcgctccca ccattcctca
    28741 ttgcacaggc gagatagcgc ggaaaaggca tcgcgcatgg tcagcttgcc tttgcgatat
    28801 ttccgccagt acagcgggcg cacgttaaag gcgcggctca ttccggcgat tttgccgtac
    28861 agctcgcgtt gtgcggtatc agtaaacaac accgtgttat ccggcccatg ctcggccaga
    28921 tagtcatcac tgagtacttc ataagcctgg cccacctgac gggcaatgcg gcgggcaaat
    28981 tttttcagcg aagcgtcgct catatccggc aggtaacgga aactgtcgaa ctcatccagc
    29041 gcccgatgct gatcaatgct gtggcgttgg ttaatggcgt caatcctcgg ccacaaccgg
    29101 cgctcaacag tcagcaccag ataacggaag gccgagcgga gcccttgatt ctttttcagg
    29161 aattcaaacc gggtacgaaa tttagccgcg agaaagcggg gcagggtatg aaggcgtgat
    29221 aaaaccgctt gcccctgatg gagttcatca cgggtaagcg ctctttcgtc ggggccaata
    29281 gccgggcggg gggcattcca ggggtaaacg ccgatgaatg gctccggcgt ttttatcttg
    29341 tctggtagcg tgtgtggtga cttggcttgt tttgcccgag gtgtgctcat gcgcggttgt
    29401 cccgccaatc cataatcatc atgagcaaac ggcaggcagc ggcccctgca agtaaaccgc
    29461 tgcccagtgc gatgatgggg agagcgtaaa tcataacgct ccccggtagt gccgctgttt
    29521 cagttcacgg atttcctggc aggtgacgca gcagcacaca cctggcaccg cgatacgacg
    29581 cgcttcgggg atcggcgcgt tgcagtcttc gcaagtatgc tgtgatgcca tgcctggtga
    29641 catccgcgct ttttgaattt gcgcggtcaa cagcgtttcc tgctgctcct gagaaatatc
    29701 gatatggtca gccatcaatc tgttctcctg cctggttctg gatgcgctcg gcttcctgcc
    29761 gtaacagttc gatgatttcc acactgctca agtgttcttt ctgagcgtgt gcggcgagct
    29821 ggtctaagcg gcttgaaaaa agcgtggcgg catgggcttt ttcttccaaa cgcgcctggt
    29881 tgatggcctg ggtcaacgta tgttgccggg tttcttcaag cagccgctga tggtatgcct
    29941 caccaatggt taacatggtg tattcctcgt ttttaggtaa tagaaagccc gacgcggtta
    30001 agcgccttaa tttttcgggc tgggattaac gggtataaat ttcgggttta acgctggtta
    30061 atatcgccgg tgcgtcgtca aaggcgctga gtaattcttg taacgcacga atcagtggcg
    30121 ctcgccaatg gcaagtttca ctttcgatac gccagatagg ttgattaaat tccgtggctg
    30181 tcagcccggc gtgaaaaaat aatgtccggc gttcaccaat cgataagcgc ttaataaaag
    30241 cactgtcgct gatttcatgc ctgcggtatt tggcaaaggc tttacgcaat tcatccaaag
    30301 cgcaaataac ccgttcgcaa acctcctgtt ccatttcctc cagttgataa accgccattg
    30361 cacggtttag cccagcatga aagcagacgg ttacccgata gcgctctgaa aagtggttat
    30421 agaaatcaca ggattgatgc caccggctac cggcaaagtg cttgccaatc aaggcccgca
    30481 gattggctgg catggtttgc aggtgaccag cggtaaaagc gtattgctga ttcatgatgc
    30541 cctcctgagt gaaccgttaa acgtaccttt gggtggtgcc cagcggcgac catcgggccg
    30601 aataatgatg cccggcttac ctttcccgtg acgaatatca gcgggtgtgc ggctttctgc
    30661 ctggtgatgc cagaggaaag gcgctatcga tattggcttg tacatgtttc ctcctattag
    30721 taaccgcccg tattcagaca gttgcgaata ggtgccggga tgttcccggc acagatggtt
    30781 atttctgaga tttctggcgt gacgttaacg gagtccagat aactgcaatg aggacaccga
    30841 caaatagcgc atcactaaca gcggaaagca ggtaattagt aaagtccacc gcgacaatca
    30901 tgaatgccag aagcagaacc gcagccagcc gcaatttatt ggctagatta ttcatcacag
    30961 ataatcttca acacgcaggc ccaaacggcg gccgacttct tccagcacct tctgttcggc
    31021 gggctcgatc tcgccgcctg cttccgcaat agtcagcata ttgacgaaaa cctcctcggc
    31081 atcttttgca gtgttcttca cgtcatccaa ttcacgcagt atgttcagac ggcctacgcg
    31141 aaagcccgct tgcaattgtt cggtaaaacg gccaatgacc tgggtgattt cattaccgaa
    31201 gtgtgccaat tgtggatttg agcgcagcag ttgatccaac ttgtcgcttt cctctttctc
    31261 gatctcgcca tcagcagccg cgaccagcaa acagccgccg ataatagctt ccatcagatc
    31321 gcggttttcg acctttttca gttcgacttt tgccgctgcg actttcttac caaagccaaa
    31381 aaatcccatt ggttacatcc tcattcatgg ttaaagggtt tattgcttcg ccttcagaaa
    31441 gaagaagcaa taaagcctca gtggttgccg ggatgtttca ccacgcccgg cgcgtggttt
    31501 ccctggtgtt gttgttattc agatattcaa tgacgcgcca atcccgctga tggcatctac
    31561 ggtggaggcc agtgccgggt ttgactggag tcgtgtttgc agtgacaggc caaccaatga
    31621 cagatacttg atgccggagt taatgctgct gataaatgca tggcggcggc tttggctcat
    31681 gcgttcggta gacacgcttt ccgctgcaac ggcacccata gcggcggttg cctgcaatac
    31741 ataggtagtg atgcgttcag cattggcctc gttcatggga accgcaggca tacatttcag
    31801 ttgtgctaac aggccatcta acaaggtggc atcttcggtg gcgtcggtaa ttgccagcag
    31861 ttcttcacaa gtgagcttgt gcggctgctc tgggttcagc ttgttgcgca gcatctgtgg
    31921 gcgcatgttt acggcgcgtg cgacgtctgc caggttctgc tggttggcga acttgcggca
    31981 cgcatcgtca aagagcggct gtttagcggt ctggtagtca aacatggtca aatttctcat
    32041 ccaatcgata ataaattcac aaatttgaat taaagggccg ggaggcgtga aagcaaatcg
    32101 gcttctttcg tcagtgcgag aatattgacc aacacccgct ctttcttcgc ggccttctcg
    32161 cggatcggca gttttccctg gtgaacccac tcataacagg tgctcattgg caccccgctc
    32221 aggcgtgaaa actcctgcag cgtgatatag ggcgttgcca gagtgattga aagtggcttg
    32281 tccataaggc atcctgttct gttagctgat gatagttact gtcagatatc atttgttata
    32341 tatcgccaag ataaaatcaa aaatgttatc tgtcaatgcg taaaagtgga aaatgttatc
    32401 tatgcgattt gacggtggga aagaagtagt acagcgaatt ttgagagctt acggcttcac
    32461 aactcagaag cagctacatg accatcttga tgtagggaat gggactgtaa gcacttggat
    32521 aaaaagaaat tactttcccg gtgaagtggt cattagatgt gctttggaaa ctggaacctc
    32581 gttagagtgg cttgctatgg gggttgggga aatgcggtca actcttgcaa agcccacaga
    32641 aaatagtatt aataatgata ctatctcttt gaaaaagatc aggattgttg gcggtaaatt
    32701 aaccgatgct ggaaagtggg gcgttgatag cacacttctt gatgattctg tctctgaacc
    32761 tgccttcatt gagaaaggga ataatgcctg gatcgctgat atggccgtaa cacaagtaag
    32821 taatggccgc tggttattag atattgacgg tgatgttgat gtgtatgacg tcgcccgtat
    32881 ccccggcaat cggctccagg tctctgggaa tgccaccaaa ttcgaatgct caatagacga
    32941 cgtaaaaggc gttgcactgg tggttattac gtttgagcga ggtagttgat tacctcgcta
    33001 attatataaa tggatgttaa taattatgaa ggcgaatgcc tttttcttag tattcttttc
    33061 cttatcactc cttcctgctc tttcgtatgc ggagaagtat gccgcacctg atgagcttct
    33121 cgatgagttt gaatcgatag ggtttaatga atttgaaatg gatgaagttg ctgtagatga
    33181 tggggcctta gtgataatgc tcgatagtga taatgctcga tagtgataaa gtcaataaca
    33241 aaagattcca tcagataatt aaagccgtat gttcagtggc gaagaaatat cctgatatat
    33301 gggatgatac tccttttgaa aaaatcgagg tcataaactt atatcaatca tttagtgttg
    33361 ttttttatgg tggtaataaa aagtgttttg acatgccatc tggcgattca tatcaattta
    33421 ttgaatcccg aaagaagatt agactttaat aggagatttt atgagcttga ataaatctaa
    33481 gttagtcatt tcactaacac tgagcatttc cttatttgct atgcctggat ttgctaagaa
    33541 cacacaaagc ccacaagaaa agagcagtaa gaatcatact atctcgctga aaaacatcag
    33601 gattgtaatg acggctaaat taaccaaggc taagaaaagg tggggcgttg aaacaacact
    33661 tcctgatgac tctgtctctg aaccgaccat cattgagaaa gggaataatg cctggatcgc
    33721 tgatatggcc gtaatacaag tgagtaatgg ccgctggtta ttagatattg acggtgatgt
    33781 gatgtgtatg acgtcacccg tatccccggc aatcggctct aggtctctgg gaatgccacc
    33841 aaattcgaat gctcaataga cgacgtaaaa ggtgttgcac tggtggttat tacgtttgag
    33901 cgaggtatct aactccttgt tctaaaattt agatataaat agaggatgaa atgagtacag
    33961 gaacgtttct tttattagct attttatttt cttcaccgat ttttctattt ttatggataa
    34021 aagagattaa gaagaaaaaa gtttataaga aagaaattga tgagctaaag atacaatccc
    34081 aagaagatag ccatcgagct tcagttctag ctcaagcttt agaagagaaa tcccaagagt
    34141 tgtcagatat aactaaaaaa gctgaacctc tttggcaata tcaagagctt cacgatgcta
    34201 ttgttactta tgagaataag ataagatcag ccgacattac agctaaaaat ataattaata
    34261 acgctatgtc aaaagctgaa agcataattg atgaagctaa tcatcaagca gagttgacta
    34321 ttagcaatgc atctgctgaa gctatttcaa ttactaaaga tgcaagggat gctcgtttaa
    34381 aagcaaaaga aaagttagac tcagctaacg aaaaagccaa tgaaataatt aataatgccc
    34441 atgataacgc aacatcatta attcagtcag cggaaaataa agcaaaggaa atagctggtg
    34501 ctgcgtatga ggctagagag tttgctgaga aatttaaaga tgttgcacaa tcaatgaaaa
    34561 ataaaataca tggatatggt gatgaatgga ttattccaaa ccaaagcgtt ttagatgaac
    34621 ttgccgaagc gtatgaattt tcagattcag gaaaggaatt ggttaaagca cggcagttaa
    34681 cgaaatcgtt aattcaatca aataaagctg ctgactgcga ttacgttgaa ccctcaagga
    34741 aagatactgc aattaaattt gtacttgatg cattcaatgg gaaagttgat acagccttat
    34801 ctaaggttaa aaataataac tatggtaaat tagctcaaga gattaaagat gcctttaacc
    34861 ttgtaaatta taatggtgct gctttccgat ctgctagaat aacggataca ttccttcagg
    34921 caagacttaa tgagttaaaa tgggctgtag ctgtacacga aatcatgctt caagaaaaag
    34981 aagagcaaag aagaataaaa gaacaactta gagaggaaga gaaagcaaga cgggaatatg
    35041 aaaaagccat aaaagaggcg gagaaagaag aaaaagcgat aaagcaagcc attgaaaaag
    35101 caacaaaaga aatgcttgat gcgagtgagg agcaacgatt agctcttgaa caacaacttc
    35161 aagaattaca acgtaaatat gatgaggctg aggcgaaaaa tcaacgagct atttcaatgg
    35221 ctcagcagac aagatcaggt catgtttatg tcattagtaa tattggttcg tttggtgagg
    35281 atgtattcaa aatcggtatg actcgcagac ttgaaccatt ggagcgtatt tatgaactca
    35341 gcgatgcgag tgtgccattt gcttttgacg tccacgctat gatttatagt gaagatgcac
    35401 catcactaga gaataattta cataaagtat ttaaagagaa tcagctaaat aaagtgaata
    35461 ataggaaaga gttctttaat gtaacgttaa aggaaatcaa atctgctatt gatgatatga
    35521 aaattaatgc acactggact atttttgctg aagctaaaga atatagggaa tctctcgcgc
    35581 ttgagagaga aaatattagc tctagtgaaa atgaacaaga tgagttagta gttgcataat
    35641 ttttatatgg tcagcactca attatacatt gataactgtt tttatataca gtaaaactat
    35701 cccgttttta caacgggata gtatcttact atggcaatca ggaagttacc cagcggcaag
    35761 tggattagtg aaacctaccc agaagggaga gcggggaagc gggttcgcaa gcagttcacc
    35821 acccgtggcg aggcggctgc gtttgagcgg tcgctgaaac tggcgggata ttctatcgat
    35881 accagccagg cggaagttgc cgggcaaaca ctctctgaac tggtgcaacg ctggtttgat
    35941 atgcatgggc gctcgttgtc agacggtgag gcgcggctgc gtaaattgca gatgctgtgt
    36001 gaaaacctga atgacccgat cgctaacctg tttaccaagg ctgattttgc tgcttatcgg
    36061 cagcagcggc taagtggcaa gtttggccgg tttgataagc cggtgaaaga atccaccatc
    36121 aaccgggaac atgcctacct aagcgcggta ttcaacgagt tgaaacgcct gggggaatgg
    36181 gaaggcggga atccacttga aggcgttcgc cagtacaagg aaagcgagaa tgaattggcg
    36241 ttcctgtatc acgacgatat ccgcttgttg ctggcagagt gcgatgcatc caacaatccc
    36301 gatctcggta acgttgtgcg catttgcctc gccaccggcg cacggtggag cgaagcacaa
    36361 gggataaagc aatctcaagt tgtgccgtat cgcgtgacct acaccaacac gaagggcaag
    36421 cgtaaccgca cggtaccaat ctcgcaggca ttatttcagc gtttaccaca gcggcgcggc
    36481 gcactgttca gcccttgtta tgacgccttt cgccaggcac tgaaacgggc gcgcattgag
    36541 ttaccggaag ggcagttaac ccacgttcta cggcatactt ttgccagcca ttttatgatg
    36601 aatggcggta atatactggt gctaaaagaa atcttagggc atacctcaat ccagatgaca
    36661 atgcgctacg cacactttgc ccccgatcac ctggatgccg ctgtgaccct gaacccttat
    36721 gaccgcttgg aaacgatgtg agatggaaga aaaacagcgt gttggctgga gtgatgagga
    36781 attaaaagcc tcggtagcag cgtatgtatc aatgaagcaa aaacggcagg ctggggaaaa
    36841 gtttgccaag aaagcgattt atgatgacct ggccgggcgt tttggccgta ccgcaaaatc
    36901 ctttgaattc cgaatgcaga atatttcatc cgtctatcag gatatggggc gtgattggtt
    36961 acccggttta acgcctgcga ctaacgttgg taccaagata tcccagcgca ttgaagtgtt
    37021 tattaacgag ttggacccta tcggcgaact gaccgatcag cagtttgaag cccaggttag
    37081 ccggttatta acccaaggag taaaagccaa gcccaagggg aacgtagccc cggcccagaa
    37141 ggtgcgagaa accaccgtga ttagtcgcga tccgctggtg aaagcctatg tactgcaaca
    37201 gtcgaatgga gtatgtgaat gctgtgcttc cccggcaccg tttcaactta ctgacgggcg
    37261 gccttacctg gaggtgcatc acctcaagcc cttggcggaa ggtggttccg acacggtaga
    37321 aaatgctgtg gcgctatgcc ccaattgcca ccgtgctttg cattatgccg tgaataaaga
    37381 tgtgctgcgc gaagggatgt atcaggcgct ttcacggcta attaaggaat agccatcatg
    37441 tttagttggt tcaaaccaaa gcataataac cgcgagcagg tcgctgatag gcttcgtcag
    37501 attgaaacgg tttttgctcc agaaggatgg gagcgacgcg cggaaattgc tgttggcgga
    37561 ttgagtgaaa tcggcttctc aaaagtgact catcacctgt tagtcgtttc atccaatggt
    37621 cgtggggtta tcgactgcca gacaggggag cgtgtagcca gagattatga agaatatggc
    37681 tcctggtatg actcgctgaa tatgacttgc cttggcattg gcccgcttga tggtgagctg
    37741 atctccattg ctgggttatg cggtggtgga ttaccggtat gtaaccgcta tggtgagagc
    37801 ctggaagtcg ctgcaccgga atggcctgat gaagacgttt atttttgccc gccaaataag
    37861 tcagcgttta ttaacggcca tcaaactggg tgctgccgta tcttccgtga ccagattctc
    37921 agcatgggct tttcctggaa tggggagttt atggcggtcg caacatccag cgatgttact
    37981 gtttggcaac gacaatcgcc tctgattcac ggtgcgtaga tatgcaaaac tctgggcggc
    38041 ggcttgatag cgatacgcca cctaaagcta gtgccatgct cagtggcgac agaaacacga
    38101 ctaatgttag ctatcgccaa taatcggaaa gacgaaacac tgatatttca gtaagttatt
    38161 gatctgtcta tacccttaca ggtttttaaa atccctcggc gttcgcgctg tgcgggttca
    38221 agtcccgctc tgggcaccat gcgttaacgc cttgtaatat aagaaaataa ttaaaagaac
    38281 atgaccgcca taggcggttt tttttgtgcc tgaaaatcat tttcctaata tcctttttat
    38341 acgcttatct tgatttctta ttttaatcat tggtaaccga cgctatcgat atatcttggt
    38401 cacatcacgc tgtttgactg atagttatat gtccggatat cgcctgattc ttattgtaac
    38461 aagtaaggcc gcgctattat ttttatatgt attacactcc cgttttatat agcgggatag
    38521 tttcaatggc aatcagcaag ttacacattg gtgagtggat tagcgaaacc tgcccagaag
    38581 gcagagcagg aaagtggatt tgtaaaccgt ttgccgatat gtagctgcta tggcaaaagc
    38641 ttggaaatta ccgagctgga atggccggat gaagacgttt attaatttat tatcggccat
    38701 caagctggat gctcccttac tctcaggcag cgcgcccgcg taagtcgcag actccatcac
    38761 tcttcttttg acggcctggc taatcggtcg gccgatacgt caactgtggt ttttgcctga
    38821 caatcgataa ccatgtccac ctggtcggca cacattgcta gtgccgcttc ggtttcgtcc
    38881 aacagggcgt tgagttcacc gttggtttgc gggttggcgg ttggaaaccg gcaaggagtc
    38941 agtctggggc agccattcac ggtaagcatg gccaccggag agggcggggc gctgacgcag
    39001 ccggataatg tcagcaggca gatcagtatc agcccagcgt ttaagcgttt cattttcatg
    39061 ttgtaatctc gctactgttt tttgccgttc ggagagtgct gcctgggtgt cggcggccat
    39121 gtcgcgtaga cgtgcttgct caacgttgtt gcgttcagct tgttcagtca gcgttttcag
    39181 ttgagttgat ttttcattca atgccgtttg ctgtagcgac agggtttgcg cttgctgctc
    39241 tgccagttga tgggtggcgt gcagccgcca ggactgcaca ccgacgccga cgataagtag
    39301 cattatgatg gcagcgatga tcatgccgct tttcatgcca actccccgcc tgcttgttga
    39361 tatatatcga gcagacgcgc tgtattgtgc tcgcgttgac cataacctgc gcccggtaaa
    39421 gaggcccata tgttattgca tcggttaatg gcgctggcaa tgcggccttg cctaatgtct
    39481 tccagtgcat ttcgttctct gatcaactga atagccagtg tgtcttgaga atcggggccg
    39541 aaatcctgca gttttaactg tgctttgtat gccggccaat aacgatagag ctgttgatag
    39601 cgcccggctg cggtggagcg ttgcccttgt ttgttgaata ttttacctgg gcgaccatta
    39661 gcgaacggat gatcatgata gtcggtgaaa atctccggtt taccatcaat acccgtcaca
    39721 atgacgtcgt aaccgcggtt acgggttaaa gggtgcgttg cggtgccttc ggaaaaagcc
    39781 agcatgtcca gaaatgcaat caggttgggg gaattattga gcatcgtcgc ttttctccga
    39841 tttggcttgc ttatccagtt gccgcacacg acgttgaatg agcagttcaa tcgtctgata
    39901 accggcgatg ccgagtgcgg cgccgatacc gttgatagcg acgggcgaca ggtcaggaaa
    39961 ttgaaccagt gcgataccgg ccatcattga gacaaaccca cccagcatca cacgaccgac
    40021 gaacagtcga agtgtgatgg gttcgctacc cgctagtact ttgccggcgg caatcagtgt
    40081 gccgatgata aatagggaga cgatgctttt atcagtttca ttcat
//
