# Supplementary material for: May the Phage be With You? Prophage-Like Elements in the Genomes of Soft Rot Pectobacteriaceae: Pectobacterium spp. and Dickeya spp
Source: Front Microbiol. 2019 Feb 14;10:138. doi: 10.3389/fmicb.2019.00138 (PMC6385640; doi:10.3389/fmicb.2019.00138)
Supplement: Supplementary file 2 [file Data_Sheet_2.ZIP › Supplementary_prophagesGENBANK_files/Genbank FILES _SRP_prophages/phiDda1.gb]

LOCUS       Exported               31922 bp ds-DNA     linear   UNK 02-AUG-2018
DEFINITION  phiDda1.
ACCESSION   .
VERSION     .
KEYWORDS    .
SOURCE      phiDda1
  ORGANISM  phiDda1
REFERENCE   1  (bases 1 to 31922)
  AUTHORS   .
  TITLE     Direct Submission
  JOURNAL   Exported Aug 2, 2018 from SnapGene Viewer 4.2.3
            http://www.snapgene.com
FEATURES             Location/Qualifiers
     source          1..31922
                     /organism="prophage phiDda1"
                     /mol_type="genomic DNA"
                     /note="/genome_id=6666666.357185"
                     /note="/genome_md5="
                     /note="/project=robertczajkowski_6666666"
                     /db_xref="taxon:6666666"
     CDS             complement(81..1172)
                     /codon_start=1
                     /product="Phage integrase"
                     /label=Phage integrase
                     /db_xref="SEED:fig|6666666.357185.peg.1"
                     /translation="MAVRKLASGKWLCECYPFGREGKRVRKQFATKGEALAFERFTMEE
                     SENKPWLGEKADNRSLREIIDLWFSLYGRTLADPKRMMAKLDIICTGLGNPKARELSAA
                     DFAHYRELRLAGQMTDSSGIPLAVVKPRTVNLEQRNLSAVFGTLKKLGHWDAPNPLSGL
                     PTFKIAQQELAFLAPNEIKRVLDACAESANPHLLLVTKICLATGARWSEAEGLSGQQVT
                     PYRITYTRTKGKKNRTVPISRELYDEIPRKSGKLFSPCRKAFERAINRTGIQLPDGQCT
                     HVLRHTFASHFMMNGGNILVLRDILGHADIKMTMIYAHFAPDHLEDAITKNPLNGLNWS
                     PKNGGRVAAANGNHSFSSPLTTG"
     CDS             complement(1280..1651)
                     /codon_start=1
                     /product="Phage protein"
                     /label=Phage protein
                     /db_xref="SEED:fig|6666666.357185.peg.2"
                     /translation="MKVLLSIKPEFVEKILDGSKKFEFRKGIFKNPDVKSVVIYSTMPV
                     GKVVGEFDIDAVIEDEPSKVWSKTKKYAGISKNFFDEYFGSKEKAFAIKIGDLRVYETP
                     LQLSALGENITAPQSYRYL"
     CDS             complement(1629..2702)
                     /codon_start=1
                     /product="Acetyltransferase, GNAT family"
                     /label=Acetyltransferase, GNAT family
                     /db_xref="SEED:fig|6666666.357185.peg.3"
                     /translation="MENLKYIPFGQVDFSDTFFDSLKSDYSHGFVEWFGKKCNSPQDKA
                     YVLYDENNKIDGFMYLKIEEGTVEDTEPQLTAHKHLKVGTFKFNQKGTLRGQRFLKKIF
                     DHALAEKVDDIYVTVFDKHSYLIRLFQLYGFVNVGTKTSLNGTENVLVRDMGTEELTGD
                     LLSDYPYINNRNKERKFLLSIYPTFHTRLFPDSKLITESPDIISDVSYANSIRKIYICA
                     MQDVLLMKAHDIIVIYRTSDNQGPAYYRSVATSLCVVEEVKTIDSFDNEEGFIKYCSRY
                     SIFTEPELRGFYKSRKYPYVISFTYNLALPKRLNRAKLIQDVGLDPNNYWGVLKLTDDQ
                     FDRITELGEINESIIVN"
     CDS             complement(2704..3486)
                     /codon_start=1
                     /product="hypothetical protein"
                     /label=hypothetical protein
                     /db_xref="SEED:fig|6666666.357185.peg.4"
                     /translation="MTDLPDPNDMLVSAQNNLLFFLKTLYLHFSPDWEQNFLPPIDETS
                     EQRIKRQIKEKESFLQSGLVILFNSAEIYIKSLIASENVFFLLKDIKDASRSKSFFDCQ
                     TIDAVDLNLIYEGISSKKIPDTFKETYEYLRKERNKVIHLGKSNNIEITNYFIKSFIVL
                     SKEIYKKPLIDMTHILFDSKNLSSEEIESSKKNYALAIIEIFKEFFPINKIIKEIYKLD
                     NEPRRWDRCIKCNIPDTTLAVISNKTSLCLACGFSNGV"
     CDS             complement(3490..4638)
                     /codon_start=1
                     /product="Repressor protein CI"
                     /label=Repressor protein CI
                     /db_xref="SEED:fig|6666666.357185.peg.5"
                     /translation="MLKAYDLPTKQALCEKLGISNSTLANRYLRDTFPADLVIQCALET
                     GVSLHWLVTGENDRTSQNEPIPSPEPFHSHETVDLSQEVEPEKKFSKSNIIDFKMGGRG
                     VIERLLEAYGFKTRQALCDHLGVSKSTLATRYMRDLFPAEWVIQCTIETGVSAQWLTTG
                     EGPMFNDTTNDSIAIQRQKLVDEKSHDPNCDFMNFGTGAKATIERLVEAYGFKNRQALC
                     DHLGVSKSTLANRYMRDSFPADWVIQAALETGVSLRWLATGEGPKFDDARNDVIAIPRQ
                     KLIDGKLYDSNYYMFDKAFLSDGLKDPVVILDGDITYIADRQFDEVVDGKWLVEIEGRT
                     SIRDLTRIPVGKVRVSGAGAEFDCGLGDIQIIAECKGFYKGL"
     CDS             4802..5023
                     /codon_start=1
                     /product="hypothetical protein"
                     /label=hypothetical protein
                     /db_xref="SEED:fig|6666666.357185.peg.6"
                     /translation="MRPQISITLAVPSVSIEKYSELTGLSIDTINDMLADGRLTRHRLR
                     KDKKREKVMINIAAMTVDALTDCDISLN"
     CDS             5056..5565
                     /codon_start=1
                     /product="Transcriptional regulator"
                     /label=Transcriptional regulator
                     /db_xref="SEED:fig|6666666.357185.peg.7"
                     /translation="MFDYQIAKQTHFDEACRAFSLCHNLAELARTAGMNQQILRNKLNP
                     DQPHKLTCEELLTLTDITEDATLIDGLLAQLNCLPAVPVNEARTERLTAYVLQATAAVG
                     KVAAESVSDERMTQTRRHSLISTISDGVRYLSLIGLTVQSRIQANPAMASTLDALSGLG
                     ASLTIG"
     CDS             5662..5817
                     /codon_start=1
                     /product="hypothetical protein"
                     /label=hypothetical protein
                     /db_xref="SEED:fig|6666666.357185.peg.8"
                     /translation="MQKPISIASFLRNNQAGASLPVEVRHGKGKQGIIIRPDGRRWNPP
                     KGAFNR"
     CDS             5830..6159
                     /codon_start=1
                     /product="hypothetical protein"
                     /label=hypothetical protein
                     /db_xref="SEED:fig|6666666.357185.peg.9"
                     /translation="MSQSVDHQKWIQRCRDIVFKGESRAQSFWERAAVDTREIILFSAK
                     PKLKSRHINYSWHQFTAEERAAIWSAIKRIRSICDETALFGPDDFLKTSNQSGTPNQPN
                     PSPIH"
     CDS             6230..6457
                     /codon_start=1
                     /product="hypothetical protein"
                     /label=hypothetical protein
                     /db_xref="SEED:fig|6666666.357185.peg.10"
                     /translation="MRNSELARATLADEALAELLTRARMEERKNQHLSVSMRLTSLTIH
                     AQRKGMSVSEVLELFRKESERFEHSAQELI"
     CDS             6457..6780
                     /codon_start=1
                     /product="hypothetical protein"
                     /label=hypothetical protein
                     /db_xref="SEED:fig|6666666.357185.peg.11"
                     /translation="MDMPQNPAYNRVDINGRYAIAKVGYDFALGEVQCDNRDGAQPYLS
                     TLAVYQTPITLVNDFVHRSLCAEIRRGTVTDITTMLTEAERLSLLCLNAFEQLENTGTG
                     LSE"
     CDS             6777..8819
                     /codon_start=1
                     /product="Phage replication protein # Replication gene A 
                     protein"
                     /label=Phage replication protein # Replication gene A
                     /db_xref="SEED:fig|6666666.357185.peg.12"
                     /translation="MNPEHNGAYHVVNQWRREQFTRNEPDGLTYVERSLWHLNPLDHQW
                     RQQYLAGMPDYLAKYFGQRYEKLFKSDGHKGRRRANTFLLRTLGKSVLPRLRTVTERYQ
                     TQQRAAGDLPFPFGDDLEKLPVYDRDNIRTLSQQVADFMAASLRDYTENRIRNTGNLTD
                     RHITLLSFRHLGLLTLQAGTQPPYWAQFTKGRRPLSTEKAESGLLRMMSPEWWRARLKR
                     RRDIQREHMAISVGQVQKAASPYVSRSTLDEWKEQKRRNREFFKAFELEDEEGNRVSLD
                     DKVNASNANPAIRRCELMVRMRGFEDLAQEIGCAGEFYTITAPSRYHAVHSGGGFVEQW
                     SGASPRDTQKYLCGVWARIRAELSREEISVFGFRVVEPHHDGTPHWHLLLFMRPEHIEQ
                     VRDIMAYHARREDADELNSEKAQTARFHYEPIDQEKGSATGYIAKYISKNIDGYALDGE
                     ADEETGESLRDMAKAVSAWASRWRIRQFQQIGGAPVTVYRELRRLGDKQLDNAAMDAVL
                     AAADVGDWAAYTQAQGGPLVSRDALVVRLSYEVTERANQYAEDVQKVQGVYSPLLGAHS
                     AIITRTVQWKIVPKQAAASAGTGVSGGPAAAWSSVNNCTPGLRRRLSELLRLRGFPPDP
                     GLIDVLIRGGNLAMSEGRALKLVNDRLEEVRMTGDCELWQGWSWG"
     CDS             complement(9186..10235)
                     /codon_start=1
                     /product="hypothetical protein"
                     /label=hypothetical protein
                     /db_xref="SEED:fig|6666666.357185.peg.13"
                     /translation="MPTHIKILLKDTKIKKGIRISLMDYRLVHIKKTKNKKRTVNYYWN
                     NRTKEIICGSGGLSKSKKIPSISHILKYKEETCNLSRKEIQLGDSVCVLFNATAADFIF
                     GTIVGFDKIGREKYFHILPHSKDFPFKKGAVIKVKYDKNKFILLKDGVNERYEKMSTKN
                     LVFAKYQYQVDFAELIISYINTYNLISSYMIDKRKKINESTIIECHKALFGKIYDWAGS
                     YRSHEVVVGDRERPTIEHADIKTSLKKSLRQCQENELAKIKNRNDLINKIVVLHAELAW
                     IHPFQDGNGRTIRLFLQIISATMGYNLNIEEIDGSLKKKKAYHYAVRRAIHNRKNNLIA
                     LISRAINEF"
     CDS             complement(10273..10413)
                     /codon_start=1
                     /product="hypothetical protein"
                     /label=hypothetical protein
                     /db_xref="SEED:fig|6666666.357185.peg.14"
                     /translation="MNLKTKSLTSTIKNTKHINHLKIIKINRFNSKHLQKKQNYTKVKK
                     S"
     CDS             10379..10504
                     /codon_start=1
                     /product="hypothetical protein"
                     /label=hypothetical protein
                     /db_xref="SEED:fig|6666666.357185.peg.15"
                     /translation="MVDVNDFVLRFMFYDAFLSTRLCCYVKKIMNFKWQDFSKIE"
     CDS             10713..10868
                     /codon_start=1
                     /product="hypothetical protein"
                     /label=hypothetical protein
                     /db_xref="SEED:fig|6666666.357185.peg.16"
                     /translation="MDREFEQSLIVERIAFLAKNAGMDGNDERDRQIALIWIAELAGQL
                     MTLQAA"
     CDS             complement(10875..11195)
                     /codon_start=1
                     /product="Phage protein"
                     /label=Phage protein
                     /db_xref="SEED:fig|6666666.357185.peg.17"
                     /translation="MGHKTLKFNHVLEAGAWNMRVLKIECPECGSKAVIRKTNRKHRQI
                     ADIYCACADVECGYTFVMNLTFSHTLSPSAKTGDQLLQTVLNNLKPEQRQMALDLLRTA
                     AA"
     CDS             complement(11195..12223)
                     /codon_start=1
                     /product="Phage portal protein"
                     /label=Phage portal protein
                     /db_xref="SEED:fig|6666666.357185.peg.18"
                     /translation="MKRTSHRRQKAQNAPRKKMSIITFGKPEPVLTTGTDYRDVWYDNE
                     FNHYTLPIDRLALAQLVNLNGQHGGILYARRNMVASDYQGGGLSHDDMLAAAFDYLTFG
                     DIAILKVRNGWGEVIALTPLPALYTRIRKTGEFVVLQKGEPLVYPPEDVIFIKMYDPQQ
                     QIYGLPDYIGGIHSALLNSEAVIFRRRYYHNGAHTGGILYTSDPNMTDEIEEEIERQLA
                     SSKGIGNFSTILVNIPNGDKEGVQFIQMGDISAKDEFANVKNISAQDVLNAHRFPAGLC
                     GIIPQNAAGLGDPEKARNTYRKDEVIPIQRRFMASINKDPEIPQNLHLIFDFADDTTIQ
                     GA"
     CDS             complement(12220..13995)
                     /codon_start=1
                     /product="Phage terminase, ATPase subunit"
                     /label=Phage terminase, ATPase subunit
                     /db_xref="SEED:fig|6666666.357185.peg.19"
                     /translation="MAKYSDELIGVARLLYLKRATPKEIAADLNLPNARIIYYWAQKFG
                     WADLLSAESTEEAIERRYQLLAGRDKKTELELQEMDMLIAHAVKLRAQSNKHKEKLAAA
                     GHGNTPGSRSNDDDERPAKKRQYRKNDISSLTKEDFDAWADEHLFGYQKHLRTNLGQQV
                     RNILKSRQIGATWYFAFEAFENAVLTGEPQIFLSASRAQAEVFRSYIVNIAQQYFDITL
                     TGNPIRLSNGAELRFLSTNKNTAQSYSGHLYCDEYFWVPNFARLNEVASAMATHDKWRT
                     TYFSTPSAKTHQAYPFWTGEEWKRGNKKRAGVNFPGFDELRDGGRLCPDGQWRYVITME
                     DAIRGGFNLASLEKLRNRYNVDTFNMLYMCVFVDNKDAVFSFDDLERCGVDPATWQDHD
                     PTAPRPFGNREVWGGYDPARSGDLSTLVIVAPPIYDGEKFRVLLVVNWHGMNFRYQANQ
                     IKKLFQRYHFTYIGIDVTGIGAGVFENIQHFAMRQATAIRYGVETKNRLVMKAADVVES
                     QRIEWDQDEKAIPASFMAIRRTTTASGNAMTFIADRSAETGHAEAFFAIAHALDNEPLN
                     YENKPQSRWRLKKAA"
     CDS             14152..14988
                     /codon_start=1
                     /product="Phage capsid scaffolding protein # Fam Scf032"
                     /label=Phage capsid scaffolding protein # Fam Scf032
                     /db_xref="SEED:fig|6666666.357185.peg.20"
                     /translation="MSQLMTNWICIATEGETVDKRVMERQWLIDAAETYDPQFYAALIW
                     PEHETWFGNMGEVLALKTETGDDGLLRLFAQLRPNHQLLQANRDGQLLFCSVELTPDGN
                     FRGTGKTYLEGLGVTNTPASVGTTRLRFSSKKRGRLFGALKPLVIDEVKEIKGNSMASK
                     SWHSLFGIKPKTFAEDEGENNEAGGDDKLQALAEALAELESRVTALESQQSQTNDAVEA
                     VQDDVDTVKEVVDTEDFATLRNNLPKILKNFGKLDRSITKLPQRQIGNKPKGFNFL"
     CDS             15043..16074
                     /codon_start=1
                     /product="Phage major capsid protein #Fam0066"
                     /label=Phage major capsid protein #Fam0066
                     /db_xref="SEED:fig|6666666.357185.peg.21"
                     /translation="MFLNQRAREYLSAYSAGLAQEYGVADTARYFALTDPKETQLRAAL
                     LERVDFLSMINVLDVDQLSGQVVSVGSSALHTGRKEGGRFIRQVGVEGNDYKLVETDSC
                     AALPWDLLSVWANAGGEDEFFQLVQAFSNEAFALDMLRIGFNGNSVAKSTNPDKNPNGE
                     DVNIGWHQRMKDFKDGQQIITDRVVLDENGDYKSLDAMASDLINAKIPQQYRNDPRLVV
                     LVGADLVAAEQYRLFQKADRPTEKIAAQMLDSTIAGRPAIVPPFMPGKRMTVTTLSNLH
                     IYTQRNTRQRKAEFVEDRKQFENKYLRNEGYAVEYPELYASFDESAVTVGTVAEPMEKP
                     AGA"
     CDS             16078..16779
                     /codon_start=1
                     /product="Phage terminase, endonuclease subunit"
                     /label=Phage terminase, endonuclease subunit
                     /db_xref="SEED:fig|6666666.357185.peg.22"
                     /translation="MALSPAQRHNARMVAEQQLSRCQAVSGDHSLHVQRRALENDVARL
                     RSQPTLRDRVEMKRRELLPRWLPTVQRYLDSGEVYQNPVFAHCVVWLFDVEEFDQGLAW
                     ADIAIAQGQSTPDNIRRTFAAFVADTVLAWAQQTADMGQSVEPYFSRTFKNVAENWRLH
                     EEITAKWFKFAGLLLLRDEQGQPRATAAADIDTLTAADALLHQAEQFYRQVGVGTMRRN
                     IAARIRALQKE"
     CDS             16876..17328
                     /codon_start=1
                     /product="phage head completion protein (GPL)"
                     /label=phage head completion protein
                     /db_xref="SEED:fig|6666666.357185.peg.23"
                     /translation="MFSGTPVDYQDEQLANNGFWPDLNVRDFQSQRTIPADLAADTVAQ
                     ALLAAVGEVNADLAEVEARSRAKGFARAQDVPGVSLKGQNVLCAQYQKAVFARAKADLL
                     GEFATIGRRESHPGQEGDDTRKGLLGEAAMVIRRMKGLKRATVRMV"
     CDS             17325..17822
                     /codon_start=1
                     /product="hypothetical protein"
                     /label=hypothetical protein
                     /db_xref="SEED:fig|6666666.357185.peg.24"
                     /translation="MSKLDDLTTFVSTHLPPRVMQGFDSFMDEVSFIPARRDLGEDQYQ
                     LAVMKFDAVLSWERWPYRVCDPRNLCALLLVWQEGQDDVPYMDAGLDMELPTLDVDVRD
                     QDSAIVVVSLQLAESLAIVADDDGIIPFDGRRWRLTSPEIWQATSGHLFGAGGDGAEVG
                     AS"
     CDS             17819..18523
                     /codon_start=1
                     /product="Phage protein"
                     /label=Phage protein
                     /db_xref="SEED:fig|6666666.357185.peg.25"
                     /translation="MIVHGELSQSQLAELRTALQRLTLPPKKRQRLLWRLAKYGVIAAA
                     KRNVRAQQAPDGSAWTARRGRRRGRMLRNLPNLLHIREMPEIQAVRIYLQGGAYRNGKT
                     PVPAGVVGYSQQNGMSVSVKRSQVGNGRPEPGRMATRRQARKLRALGYRVKRGARWKKP
                     PYREIEETLSFAQAGLLIRKLSGKAAKTAWTVDVPARPFLGMNDAEFTKALARQLQGIG
                     FGWDVKAQDIKG"
     CDS             18526..19641
                     /codon_start=1
                     /product="Conserved hypothetical phage protein"
                     /label=Conserved hypothetical phage protein
                     /db_xref="SEED:fig|6666666.357185.peg.26"
                     /translation="MSWPTVQVNQVNQLQGETSEIERVVLFIGEGAVDAVKTVPVNTQS
                     DLDQVLGAADSVLKRDVSAAMVNAGQNWSAFVCLLPPKGDWVSAVTAAQQVASVEGVVV
                     SLPASKNSIAQAASLRSALVSKFGRWVWFLLAIDGPKEGEGWDKYLQSLSNLQNGAAAP
                     AVQLVPRLWGNEPGVLAGRLCNRAVTIADSPARVQTGALLAMGRTDLPVDGTGVMLDLA
                     MLQALEKQRYSVPMWYPDYDGYYWSDGRTLDVEGGDYQAIENLRVVDKVARRIRLQAIA
                     KIADRSLNSTPGSIAAHQGYFAKTLREMSRSTQINGITFPGEVKPPKDGDVVIAWRSKT
                     AVEIYLVVRTYECPKGITVSLVLDMSLEGSA"
     CDS             19638..20093
                     /codon_start=1
                     /product="hypothetical protein"
                     /label=hypothetical protein
                     /db_xref="SEED:fig|6666666.357185.peg.27"
                     /translation="MTKRISGQSFDFNMDGALVHAEKVSLSITDNTAAAQTQGIPDGWV
                     AGDVAAEGEMELSTKSLAVVTAKASSAGSWRGIEPVDLMWYAKAGSEEMKVEAFGCKLI
                     LSDILDVDPKGGSVMSHKIKFVVTSPDFVRINGIPYLESELTEKLIG"
     CDS             20102..20407
                     /codon_start=1
                     /product="Holin"
                     /label=Holin
                     /db_xref="SEED:fig|6666666.357185.peg.28"
                     /translation="MQEYEKNALGLLVLGALIALGKLLASDEKITPRLFFGRMILGSAT
                     SMAAGAALVWVPGLPPMAVTGLGAALGVAGHQAVEIWLRRRGSSLLKGSDAKDDVK"
     CDS             20394..20735
                     /codon_start=1
                     /product="Phage protein"
                     /label=Phage protein
                     /db_xref="SEED:fig|6666666.357185.peg.29"
                     /translation="MTLSEKQQLFTQLVAQLIQWAGERGYRLTFGEAYRTPEQAKLNAR
                     NGSGIANSLHTQRLAVDLNLFIDGEYQTRTEAYLPLGEYWESLGGCWGGRFTSRPDGNH
                     FSLEHNGVR"
     CDS             20735..21091
                     /codon_start=1
                     /product="hypothetical protein"
                     /label=hypothetical protein
                     /db_xref="SEED:fig|6666666.357185.peg.30"
                     /translation="MDGLWRVVAGLAVAFAAGWLVASWQRDSVDLAVTRAATAAAEQSR
                     QALQALASQSGAALESKLEALRNVPNKTVYREIVKPVFTNVCLSAEFVSLYNDAVNHTE
                     RVLSGKPEKEMSGQ"
     CDS             21048..21227
                     /codon_start=1
                     /product="hypothetical protein"
                     /label=hypothetical protein
                     /db_xref="SEED:fig|6666666.357185.peg.31"
                     /translation="MSYQENLKKKCPVNNLPRLSGTTGNDAAQPLISWPQIYADCAARH
                     NQLIDEITQRENMQ"
     CDS             21224..21481
                     /codon_start=1
                     /product="Phage protein"
                     /label=Phage protein
                     /db_xref="SEED:fig|6666666.357185.peg.32"
                     /translation="MSKITLSVSGKELSFEPNTVAYNGMINDMAMDNKVAPAVTYLRRI
                     VVAKDKETLDELLKLPGAALQITEAVNAQYAPKLEIEVKN"
     CDS             complement(21543..21677)
                     /codon_start=1
                     /product="hypothetical protein"
                     /label=hypothetical protein
                     /db_xref="SEED:fig|6666666.357185.peg.33"
                     /translation="MLHESPFNASAIPFATEIRIFSQCVFASQTARARLSASSFSAGK"
     CDS             21669..23633
                     /codon_start=1
                     /product="Phage protein"
                     /label=Phage protein
                     /db_xref="SEED:fig|6666666.357185.peg.34"
                     /translation="MKQLDFTLSLIDKLTRPVKQAQAAVNGFAKSSRDAFSKIAVGGAG
                     LIGTAMSIQGALGPAVEMHGAMVEASARGVDDSALQKINANALKFSTQYGRSALEYVQS
                     TARINAAVGTLTKEDLPGVVRASNLMAAALKATADESSEFMGQMFANFRSDAESMGNVQ
                     FAEQLASKAAYMRNAFGVELGAIKDLMEGARGVGTNYGIGMDEQLAVMGELQRTLGTEA
                     SSSYEGFLSGAVKGAKKLGLSFEDANGKLLTMPAMLEKLRGKYGASIEGNLKAQSDLDD
                     AFGDSAAVIKQLYGNVGALQRHITELGSSDGMKRATEMAQKMASPWERLTAIWYAIRAA
                     MGATLLPVLYPLINKMADGGQVLVRWLNLFPNITRVIGYCVLAVMSLAAAGALVNIVLG
                     VGRFVLMGLRGLWAGLTAVIRIHVVAIWLYNKAVLAWAATMRILRGVLLAVRMASLLTG
                     VAFNIALWPVLLIIGAVALLVAGCYLLIKHWDGIKNAITQTDMWKTVTEKVQWVAEIFG
                     QAWQGIVDGWNRVVNAMGNFSLSETMGKMVDGVGEIFSGLWDGVLASFNASYRWIVEKL
                     NAIPGINIAMPESVPRPGGEGLLTGGKIKGIDSGGLQQDISNSNAKNYTDNSRKVENLT
                     IYANKGFTPEQLTEWEALR"
     CDS             23633..23962
                     /codon_start=1
                     /product="Phage protein"
                     /label=Phage protein
                     /db_xref="SEED:fig|6666666.357185.peg.35"
                     /translation="MDDVKYIDLLITERDFSLNAGREPIFCNNRISIGQDCVHAIIESG
                     LTTKLVAERSPTLRADVLTQMIILVEDDERIIPGTVVVSEESPTRLWVTAETYDFGPIT
                     ARVDV"
     CDS             23959..25143
                     /codon_start=1
                     /product="Putative bacteriophage protein"
                     /label=Putative bacteriophage protein
                     /db_xref="SEED:fig|6666666.357185.peg.36"
                     /translation="MTEKPKIDYEQALKEAGMPVTAEKVTEQFQAQVTASGLVTNTSRM
                     SPFWRLISVMVTTPVIWLKDVLISVVLANMYLATASGSFLNLFAWGVNLSRKAATAASG
                     VIRFYKSDAAQAVVIPAGTLIQTERINGTIFSLAVSADTVITAGQASADVPVIATAEGG
                     AFNLAPGYYRILPVGVAGIERVENQEDWLLTPGADEESDDELRERCRNQFNLVGNYHTD
                     AVYRSMIAAVAGLSIDRIFFQHDAPRGPGTANAYLLLDSGVVSQPFIDAVNDYITAQGY
                     HGHGDDLRCVALPETQHDLTVTVYVRNLVNMTDEALAALRTGCQDLVRCAFRENTGYDV
                     EKTWPWSRFSFSTLAQELHDTFPLIASLDFSLGDIVSGLSVPRLASLTVVIADA"
     CDS             25136..25768
                     /codon_start=1
                     /product="Phage protein"
                     /label=Phage protein
                     /db_xref="SEED:fig|6666666.357185.peg.37"
                     /translation="MPDFKEQLAGLRLPSWMDKGEPAGLLNASKAYWLQVNDWLRWPLQ
                     QLDVDTCAEPLLNVLAYQRDISRLKGEALDLFRRRVKYAFVNAQDAGSVAGFIAIFERL
                     GIGTVTLAERQPGYDWDVILVRINDEQLSGYNALMMSLVRQYGRTCRRYTFDLSNGETQ
                     SVRGGEFEHNAEYYHAISLMPVGTITARVALRYARASASTEYYSANV"
     CDS             25777..27198
                     /codon_start=1
                     /product="alternative bacteriophage tail fiber C-terminus"
                     /label=alternative bacteriophage tail fiber C-terminus
                     /db_xref="SEED:fig|6666666.357185.peg.38"
                     /translation="MAQSVITHAFETWNVQRVLDGVAARPDKVVFARIPGQDESVPVDR
                     NEGLPPADQIQHTAAITQAGVLNENAVVYSVVLDTTVGDWDYNWIGLLDSQTNTVLMIV
                     HVRTQQKLATRNGQQGNSLTRNLMMQFDGAAAATQINVTADTWQIDFSARLAGIDERIR
                     IENMDRYGSSAFFGNAYQVVKDGNAYVVKAGVAYAAGLRTSLSSDLKITVDALPTRVFL
                     DVCWRGEFTQAWAVDSQIVVANSADHEIRDGVQHYLLPVADIDENGNITDWRKQGSLAE
                     QNAQTLYLRKDDNLAALRDKEASRKNLGLGQLAVMDTDTARQTLRITQLENELVGIPLP
                     YPGATAPDGWLKCNGQSFNKSMYPLLAGRYPSGFLPDLRGEFIRGWDDGRGVDVGRGLL
                     SAQTQAIQDHRHVGTMVNSNPLQTGMNTGIGLLSQYTPTPTVGYSNEISSGGTVDGSKE
                     TRPRNIAFNYIVRAA"
     CDS             27198..27818
                     /codon_start=1
                     /product="Tail fiber assembly protein"
                     /label=Tail fiber assembly protein
                     /db_xref="SEED:fig|6666666.357185.peg.39"
                     /translation="MRNNSVMANETTLDENGHAVSSGWITVYHVDASTREYLGNSQEYL
                     LVGTGIPADSYADTPELPGTGQALCRTTDGQQWEYVPDYRGVTAYHTETREPFTVASLG
                     ELPAFATLQAPSSEFDVWSGKEWVTDKDVQKQAEIIAAQRDQGLRLETATTRIQMLGDA
                     VELNMATDDEVAALNAWKAYRVLLNRVDVNAAPDIDWPEAPAV"
     CDS             27815..28540
                     /codon_start=1
                     /product="hypothetical protein"
                     /label=hypothetical protein
                     /db_xref="SEED:fig|6666666.357185.peg.40"
                     /translation="MTWRCADICLTSALPPVTCSVLPVHPWVYGVGNVTDSGHYLSPVN
                     AVTYLADKLGAAADNVAVCVWMVCGNGLGEFLQALEALAEVFPTPVLSQVARQARAMAE
                     LSTVKMQLPAKSRTLPAAALLSVATCRQALTAQRMAVAQQQATAPMGLDALKGMAERFA
                     SQRDAALSEISQAMQQMAQRRAPAWVFTGRGTPGVIAVEMLKNIPRPSAIYTAAMMFTG
                     TELDALESMIREPDNYARP"
     CDS             28512..29039
                     /codon_start=1
                     /product="Phage protein"
                     /label=Phage protein
                     /db_xref="SEED:fig|6666666.357185.peg.41"
                     /translation="MSQIITLALDGEAIPLRGLTVTPSMQFEEKDQSGQTSSTANAEQG
                     IKPKELRVSGVIPFTEAKVLTRLFALAEAKEGNKLKRYRVANPTAQAINFRLATFTGSI
                     DAPKQDGKQAWLVTFTLREHISVSEKRDARAGNQTETKKQAPGKGSDAGESDEQLSWFE
                     RKVLKPVNDALG"
     CDS             29043..30695
                     /codon_start=1
                     /product="Hypothetical bacteriophage protein"
                     /label=Hypothetical bacteriophage protein
                     /db_xref="SEED:fig|6666666.357185.peg.42"
                     /translation="MRPITRLMLSGDAVHAVDVNMVLELNACGRGFITAETQQDYTGKL
                     VRLDVGYTDLVLRWFTGYVERSQPAENGYQRLFVRELAGVFDRMWPCAFQHPTLRQLAD
                     WLSEHSGLTVHLPDAGYVSQPIPHFTHSGSGHQLLANIGAAFGIDDYVWQPLPDGALYL
                     GSWDDSLLAGAPVNIPAEFSQAQAAGNSMTLPLIQSVRPGAVVNQQRLSRVQLLNENMT
                     IEWVPVSTVTGRAAQRSPAQRQIDTAYPELSAGLHLPKFARVEAPSEAVSSGNIADPFR
                     PRYAVDLQLLDADGKPAKDTPLYPAVPLPVPMAGSEAGLFQFPPPGTLVEVGFTGGRPD
                     KPFVRQTVASGQSLPDIKPGEQLQQQRAEVSQRVTVAGDWERKTDQAIRESSMHREVSA
                     DEERRTLVTRETLIKATDNATVLGTHILQAGAIVQIAQGDYSLATQAGYTASVGQSATV
                     EVGQSLTEKIGQLRRSIAGARQELVAPVVWVGSQQVNVMTLMLDTLDVIQELATQTASH
                     THNNTGTPLNAGEIQQTGRRTGTLKDKYSPIIG"
     CDS             30873..31064
                     /codon_start=1
                     /product="hypothetical protein"
                     /label=hypothetical protein
                     /db_xref="SEED:fig|6666666.357185.peg.43"
                     /translation="MTKSALHRTRLRFSDRKDFSVLFFYKTQRQPAPLPGFCGRASTEN
                     SEMNFSVFQLFGSGKDRL"
     CDS             complement(31246..31752)
                     /codon_start=1
                     /product="hypothetical protein"
                     /label=hypothetical protein
                     /db_xref="SEED:fig|6666666.357185.peg.44"
                     /translation="MALTKCKECKKEVSTSAKVCPHCGVKNPGTTAGQAIGGFVVLVLL
                     VWGAIKIFGGSDDNKPAAKADTPKNCAANDGQCLFDKNWIEAASRCRPLIEKSSKYDFE
                     WTDGMMTPMFSHFRLNEAKKQMTFIGDKVKFTNGFNAKITMTYNCTYDLQGKSIVDFGI
                     TEGKL"
ORIGIN
        1 gggagttgaa cccgcgtccg aaattcctac attccttctg gcgggtagta aaaacaacaa
       61 attacagtaa aaacaaaatg ttatcctgtg gtgagtggtg aggaaaagga gtgattgcca
      121 ttcgctgccg ccaccctgcc gccatttttt ggcgaccagt tcaggccgtt gagtgggttt
      181 ttagtgattg cgtcttccag atggtcgggc gcgaagtggg cgtagatcat ggtcattttg
      241 atgtcagcat gaccgaggat atcacgcagc accagtatat tgccgccgtt catcatgaaa
      301 tggctggcga aggtgtggcg cagtacgtgg gtgcattgtc catctggaag ctgaattccc
      361 gtccggttaa tggcacgctc aaaggctttg cggcagggag aaaacagctt gccgctttta
      421 cgtgggatct catcatacag ttcacggctg atgggaacgg ttcggttttt cttgcccttg
      481 gtgcgggtgt aggtgatgcg ataaggcgtg acttgctggc ctgatagccc ttccgcttcg
      541 ctccagcgcg cgcccgttgc cagacatatc tttgtgacta gcaacagatg cgggttagca
      601 gattcggcgc acgcatccag tacgcgcttt atctcattgg gagccagaaa cgccagttcc
      661 tgttgcgcta tcttgaatgt tggcagaccg gataacgggt tgggtgcatc ccagtggccc
      721 agttttttca gtgtgccgaa gacggcggat aagttgcgtt gttccagatt gaccgttcgt
      781 ggtttgacga cagccagagg gatgccgctt gagtcagtca tctgcccggc taaccgcagt
      841 tcgcggtaat gcgcgaaatc ggcggcgctc agttctctgg ctttggggtt gcccaaaccg
      901 gtgcagatga tatcaagttt cgccatcatc cttttagggt cggccagtgt acggccgtaa
      961 agagaaaacc acagatcgat aatctcccgc aggctacggt tatccgcttt ttcgccaagc
     1021 cagggcttgt tttcactctc ttccatcgtg aagcgctcaa atgccagcgc ctcacctttg
     1081 gtagcaaact gcttgcgtac ccgtttgcct tcacgcccga atgggtagca ctcacacaac
     1141 catttccctg atgccaactt acgaacagcc atacaccccc cttgtaaact gaggatgcat
     1201 acttactgtg tataaaaaca gtcatcaatg tatggatgtt gtgagagcaa acaaatggcg
     1261 aaaggtggcc aaggccacct tagaggtaac ggtaagactg aggagcggtg atgttttcac
     1321 ctaatgcact gagttgtagt ggtgtttcat aaacacgcag gtcgccgatt ttgatggcga
     1381 aagccttttc tttgctaccg aaatactcgt cgaaaaagtt tttactgatt ccagcgtact
     1441 ttttcgtttt gctccagact ttagatggtt catcttcgat tactgcatca atatcgaatt
     1501 caccaaccac ttttcctacc ggcattgtgg aataaatgac gactgatttt acatcagggt
     1561 ttttaaaaat ccctttacgg aattcaaatt tctttgaacc atcgagtatc ttctcgacga
     1621 actccggctt aattgacaat aatactttca ttgatttcac ctaattctgt tattctgtca
     1681 aattgatcat ccgttaattt caaaacaccc caatagttat ttggatctaa tccgacatcc
     1741 tgaattagtt tagcacggtt tagccgtttt ggtaaagcta gattataggt aaagctaatt
     1801 acataaggat attttctgct tttatagaag ccacgtagct caggctcagt aaatatgctg
     1861 tagcgtgaac aatatttaat gaatccttct tcattgtcaa agctatctat tgttttaact
     1921 tcttcaacaa cacataaaga tgtggctaca gaacgatagt aggctgggcc ttggttatca
     1981 ctcgttctat atatgacgat aatgtcatgt gctttcatca acagtacatc ctgcatcgca
     2041 catatgtaaa tctttctgat actgttggca tacgacacat cagatataat atcgggtgat
     2101 tcagtgatga gctttgagtc tgggaagagc cgggtgtgaa atgtggggta tatagaaaga
     2161 agaaatttac gttccttatt tctattgttg atatatggat agtcagaaag cagatcacct
     2221 gttagttctt ctgtccccat atctcttact aatacattct ctgtcccatt caggctagtt
     2281 tttgtcccta cgtttacaaa tccatataac tggaataatc tgataagata gctatgttta
     2341 tcaaaaaccg tgacgtaaat atcatccacc ttttcagcca gagcatggtc gaatatcttt
     2401 tttaagaaac gctggccccg taatgttcct ttttggttaa atttgaatgt gccaactttc
     2461 aaatgcttat gtgctgttaa ctgtggctca gtatcttcta cagtaccttc ttctattttc
     2521 agatacatga agccatcaat tttgttgttt tcatcgtaaa gcacatatgc tttgtcttgt
     2581 ggtgaattac atttcttccc aaaccattca acaaagccat gagagtaatc agattttagt
     2641 gagtcaaaaa aagtatcaga aaaatctacc tgaccgaatg ggatgtattt taaattttcc
     2701 atgtcaaact ccgttgctaa aaccacaggc taaacataat gatgttttat ttgatatgac
     2761 agctaatgtt gtatcaggta tgttacattt aatgcatcta tcccatcgtc tcggctcgtt
     2821 gtctaactta taaatctctt taattatttt attgatgggg aagaattcct taaatatttc
     2881 tattatggct aaagcataat tcttctttga tgattcaatt tcttctgatg ataggttttt
     2941 agagtcaaaa agtatatgtg tcatatctat caatggtttt ttgtatattt ctttagatag
     3001 gactatgaag gattttatga aataatttgt tatttcaatg ttattgcttt ttcctaaatg
     3061 gattacttta tttcgctctt ttctcaaata ttcataggtt tctttaaacg tatctggaat
     3121 tttttttgat gatatacctt cataaattaa gtttaaatcg acagcatcaa ttgtctgaca
     3181 gtcaaaaaaa gattttgacc tgcttgcatc tttaatgtct ttaagtaaaa agaaaacatt
     3241 ctctgatgca attaaagatt ttatataaat ctcggcagaa ttaaaaagaa taactaagcc
     3301 agattgtaag aagctttctt tttcctttat ctgtcgtttt atcctttgct cactggtttc
     3361 atcgatcggt ggtaaaaaat tttgctccca atctggagag aagtgaagat ataaagtttt
     3421 taaaaaaaat aataaattat tttgagctga tacaagcata tcgttagggt ctggcagatc
     3481 tgtcattttc tataatcctt tataaaaacc tttgcattcg gcaataattt gaatatctcc
     3541 cagcccacaa tcaaactccg ccccagcccc gctaacgcgc actttcccta ctggtatacg
     3601 ggtcagatct ctgatgctgg tccggccttc aatttcaacc agccacttac catcaactac
     3661 ttcgtcaaac tggcgatcgg caatgtaggt tatgtctcca tccagaatga caactgggtc
     3721 tttcagtcca tcggacagaa aagccttatc aaacatatag tagtttgaat cgtagagttt
     3781 tccatcgatc agcttttgcc ttggtatagc gatcacgtca tttcttgcgt catcaaactt
     3841 tgggccttca cctgtagcga gccagcgtaa agatacgccg gtttctaaag cagcctgaat
     3901 gacccaatca gcaggaaaag agtcacgcat gtatctgtta gctaaagtgc tttttgatac
     3961 accgagatgg tcacatagag cctgacgatt cttaaaccca tacgcctcga caagacgctc
     4021 aatcgtggcc tttgcaccag tcccaaaatt cataaagtcg cagtttggat cgtgggattt
     4081 ttcatcaacc agcttttgcc gttgtatagc aatcgagtca tttgttgtgt cattgaacat
     4141 tggcccttca cctgtcgtta gccattgagc agagacacca gtttcgattg tgcattgaat
     4201 aacccattct gctgggaata agtcgcgcat gtagcgtgta gcgagtgtgc tttttgatac
     4261 gcctaaatgg tcacacaaag cttgccttgt tttaaatccg taagcttcta gtaatctctc
     4321 aattacacct cggccaccca ttttgaaatc aatgatgttc gattttgaga actttttttc
     4381 tggttctact tcctgtgata gatcaactgt ttcatggctg tggaacggct ctggcgaagg
     4441 aataggctca ttttgactgg ttctatcgtt ctcaccggtc actaaccagt gtaaagaaac
     4501 tccggtttcc aaggcacact gaatcacgag atcggcaggg aaagtatctc tgagatagcg
     4561 gttagctaat gtactgttac ttatacctaa tttttcacac aaggcctgct tcgtcggtaa
     4621 atcatatgcc tttagcatac ggtcaatagc tgcttttcca cctcgacgta aatccataca
     4681 catcccgaat ggttaataaa tgtcttgact atctcttttc gggaatctat ttttatctcg
     4741 aaacaagata ctcataggta ctaaacacgg ctcaccacaa gccaataggg aatgttgcat
     4801 tatgagacct caaatatcaa tcaccctggc cgtgccgtct gtctcgattg agaaatacag
     4861 cgagctgacc ggcctttcta tcgacaccat caacgacatg ctggccgatg gccgcttaac
     4921 tcgtcaccgc ctgcgcaaag ataaaaagcg tgaaaaggtg atgatcaaca tcgccgctat
     4981 gaccgttgat gcgctcaccg attgtgatat ttcactcaat tagttcgata ttgggatttc
     5041 tggagttcgc aaaccatgtt tgattaccag atcgctaaac agacgcactt tgatgaagcc
     5101 tgccgggcct tttcactttg tcacaatctg gcggagctgg cgcgcacggc ggggatgaat
     5161 cagcaaatcc tgcgtaacaa gctgaatcca gatcagcccc acaagctgac ctgtgaagaa
     5221 ctgctgacgc tgaccgacat caccgaggat gccacgctga tcgatgggct tttggcgcaa
     5281 ctgaactgtc tgccagcggt gccagtgaat gaggccagaa cagagcggct taccgcctat
     5341 gtgctgcaag ccactgccgc agtagggaag gtagccgccg agagcgtatc ggatgagcgt
     5401 atgacgcaga cgcgacgcca tagcctaatt agcaccatca gcgacggggt gcgttacctg
     5461 tcgctgattg gcctgacggt gcaatcacgt attcaggcta acccggcgat ggcgtcaacg
     5521 ctggatgctc tgagcgggtt aggagcatcg ctgacaatcg gataataaca acaccaggga
     5581 aaccacgcgc cgggcgtggt gaaacatccc ggcacctatt tgcaaccgtc tatctgtggg
     5641 tggttaccaa taggaggaac aatgcaaaag ccgatctcaa ttgcctcttt cctgcggaat
     5701 aaccaggccg gggcatcgct tcccgtagag gtgcgtcatg gcaaaggcaa gcagggcatc
     5761 attattcggc cagatggccg ccgctggaac ccgccgaaag gggcgtttaa ccggtaatca
     5821 ggagggaata tgtctcaatc tgtcgatcat cagaaatgga tacagcgttg ccgggatatc
     5881 gtgtttaaag gagagtcccg cgctcagtct ttttgggaac gggccgcggt ggatacccgt
     5941 gaaataatcc tgttttctgc aaagccaaag ctgaaatcac gccatattaa ttactcatgg
     6001 catcagttta cggcggaaga gcgcgccgcc atctggagcg caattaagcg catccggtct
     6061 atttgcgatg aaaccgcgct atttggcccg gatgattttc tgaaaaccag taatcaaagc
     6121 ggcaccccga atcagccgaa cccgtcaccc attcattaat taacccatag caacgaataa
     6181 atgcctttta tcgggcaggg attcgtatta cctgaaaaag gaaaacacga tgagaaatag
     6241 cgaattagca agggccaccc tcgcggatga agcactggct gagctgctga cacgggcaag
     6301 aatggaagag cggaaaaacc agcatttatc tgtctctatg cgtctcacct ctttgacaat
     6361 tcacgcacag cgaaaaggga tgtccgtcag tgaagtactg gagctattcc gtaaagagtc
     6421 ggaacgtttc gaacattctg cccaggagct tatctaatgg atatgccaca aaacccagct
     6481 tataaccgtg tggatatcaa tgggcgttat gcgattgcga aagtgggtta tgactttgcg
     6541 ctgggggaag tgcaatgcga taaccgggac ggcgcacagc cttatctgtc caccctcgcg
     6601 gtataccaaa cgccgattac gctggtgaat gattttgtgc atcggtcgct ctgcgctgaa
     6661 attcggcgtg gaacggttac tgacatcacc accatgctga ccgaagcaga gcgcctttcc
     6721 ctgctgtgct tgaatgcctt tgaacagtta gaaaacactg gaaccgggtt aagtgaatga
     6781 acccggaaca caatggcgct tatcacgtcg tcaatcagtg gcgacgtgag cagtttaccc
     6841 gcaatgaacc ggacggctta acctatgttg agcgcagtct ctggcatctt aacccgctgg
     6901 atcaccagtg gcgtcagcag tacctggccg gaatgccgga ttatctggcg aagtatttcg
     6961 gccagcgtta tgaaaagctg tttaaatccg atgggcacaa gggccgccgc cgggccaata
     7021 cgtttttact ccgtaccctg gggaaaagcg tattgccacg cctgcgcacc gttaccgaac
     7081 gataccagac gcaacagcgt gcggcgggag atctgccttt cccgttcggt gatgatctgg
     7141 aaaaactgcc ggtttatgac cgtgacaaca tccgcaccct gtcgcaacag gtggccgact
     7201 tcatggccgc atcgttgcgc gactacaccg aaaaccgcat caggaacacc ggaaatctaa
     7261 ctgacagaca tatcaccctg ctgtcattcc gtcatcttgg cctgctgacc ttgcaggccg
     7321 gaacgcagcc gccgtactgg gcgcaattca ccaaaggccg ccgcccgtta tccaccgaga
     7381 aagccgaatc tggcttgtta cgcatgatgt cgcctgaatg gtggcgggcg cgattaaaac
     7441 gccgccgtga tatccagcgg gaacacatgg cgatctccgt tggccaagtg caaaaagcgg
     7501 cgtcgccgta tgtctcgcgc tccacgctgg acgaatggaa agagcagaaa cgccgtaacc
     7561 gggagttttt caaggcattt gagctggaag atgaagaggg taaccgtgtc tctcttgatg
     7621 acaaggttaa cgccagcaac gctaacccgg cgatccgtcg ctgtgagctg atggtgagaa
     7681 tgcgcggctt tgaggatttg gctcaggaaa ttggctgcgc cggggagttt tacaccatca
     7741 ccgcgccatc acggtatcac gcagtgcata gcggcggcgg gttcgtcgaa cagtggagcg
     7801 gggccagtcc acgcgataca cagaaatacc tgtgcggtgt ttgggcgcgt atacgggcgg
     7861 aactgtcacg tgaagagatt agcgtgtttg gcttccgggt cgtcgaaccg catcacgatg
     7921 gcacgccaca ttggcacttg ctgttgttca tgcgcccgga acatatcgaa caagtgcgcg
     7981 acatcatggc gtatcacgcc cgcagggaag atgccgatga actgaacagc gaaaaggcgc
     8041 aaacagcccg cttccactat gaaccgattg atcaggaaaa aggcagtgct acgggttata
     8101 tcgccaagta catcagcaag aatatcgatg gttacgcact ggatggagag gccgacgagg
     8161 aaaccgggga aagcctgcgc gacatggcaa aggcggtatc tgcctgggcg tcgcgctggc
     8221 gtatccggca gtttcagcaa attggcggcg cgccggtaac ggtttaccgc gagttgcgtc
     8281 gcctgggtga taagcaactg gataacgcgg cgatggatgc ggtactggcg gcggcagacg
     8341 tgggcgactg ggcggcatac acacaggcgc agggcgggcc gttagtttcg cgtgatgcgt
     8401 tggtggtgcg cctgtcctat gaagtgaccg agcgtgccaa tcagtacgcc gaagacgtgc
     8461 aaaaggttca gggggtgtac tcgccattat tgggggcgca ctccgcgatc atcacccgaa
     8521 cagtgcaatg gaagattgtc ccgaaacagg ccgccgcgtc agcggggacc ggggtttctg
     8581 gcggccccgc cgccgcttgg agttctgtca ataactgtac gccgggccta cggcgacgat
     8641 tatcggaatt gttgcgctta aggggttttc cacctgatcc ggggctgatc gatgtgctga
     8701 ttcgtggcgg caatctggca atgagtgagg gtagggcgct gaaactggtc aacgacaggc
     8761 tggaggaagt acgtatgacg ggagattgcg agctgtggca ggggtggagc tggggttaat
     8821 aatttgtttt atatgacata attcttccat tataagttta tgatgtgcca ctgtcagccg
     8881 taacgttgtt gttgaaaata tgagctcctg tgcatatact tatctataaa tatagggttt
     8941 tagtttttta agttacaatc accaggtgca gaaatatggg aagaaatagg atcatcattc
     9001 aggttagagg gaatggtgaa gttgttaaat ctgtaaatgg ttctacgctt agggatagtg
     9061 tagaacgttc tttgcgcgcc tctttctcat tggagggaag taatgtcagt gacgtttctt
     9121 gggagaaaat taagttttct gaaagttatc taactaaatc atataagtaa aatagcgttg
     9181 gaattttaaa attcattgat tgctctcgat ataagagcaa tcaggttgtt ctttctgtta
     9241 tgaattgctc tcctaacagc ataatgatag gcttttttct tttttaatga accatcgatt
     9301 tcttcaatat ttaaattata tcccatggtt gcagaaatta tttgaagaaa taatcgtatt
     9361 gtccttccat taccatcttg aaaaggatga atccaagcta gttctgcatg taatactaca
     9421 atcttattta tcaaatcatt tctatttttt atttttgcta attcattttc ttgacactgt
     9481 cttaagcttt tttttaaaga tgtttttata tcggcatgtt ctatagtcgg tctttctctg
     9541 tcacccacaa caacctcatg gcttcgataa ctcccagccc aatcataaat tttaccaaat
     9601 agtgccttgt ggcattcaat aatagtcgat tcatttattt tctttctctt gtctatcata
     9661 tatgatgaaa taaggttata agtgttgatg tacgagatta ttaattcggc aaaatcaacc
     9721 tgatattgat attttgcaaa gacaaggttc tttgttgaca ttttttcata tctttcattt
     9781 actccatctt ttagtaggat gaacttattt ttatcatatt ttacttttat tactgcacct
     9841 ttcttgaatg ggaaatcttt gctgtggggt aaaatgtgaa agtacttttc cctccctatt
     9901 ttgtcaaagc caacaatagt tccgaaaatg aaatcggcag ccgttgcgtt aaataaaaca
     9961 caaacggaat cacctagttg aatttctttt cttgataagt tacatgtttc ctctttatat
    10021 tttagtatat ggcttattga tggtattttc ttcgattttg ataagccacc actaccgcaa
    10081 ataatttcct ttgtcctatt gttccaataa taatttactg ttcttttttt gttttttgtc
    10141 ttttttatat gtactaaccg ataatccatt aggcttattc ttatgccttt ttttatcttt
    10201 gtatctttta gtaggatttt aatgtgtgtt ggcattttat taaagtgatt ggatgatgtt
    10261 aatttgccta aattacgatt ttttcacttt agtataattt tgtttttttt gcaaatgctt
    10321 agagttaaat ctatttatct ttatgatttt taaatgattt atgtgtttgg tgtttttgat
    10381 ggttgatgtc aatgatttcg ttttgagatt catgttttat gacgcctttt tatcaacaag
    10441 gttatgctgt tatgtgaaaa agataatgaa ttttaaatgg caagattttt caaaaataga
    10501 gtgaaattat tatttttgtt ttgtatgtat atcaatgtag ggtgtttttg cgggcgtaaa
    10561 tataaaaata aaattggtta aataagtgat gctttggtgc ctatctgttt gttgagcgag
    10621 ggataagaat ataaatataa actgtttgtt ggctatgcat ataagtttga actgtttttt
    10681 atgtgagcgc tattagctgc aggagatgac taatggatag ggagtttgaa cagtcactga
    10741 ttgtcgaacg gattgctttt ttggccaaaa acgccgggat ggacggaaat gacgaacggg
    10801 acaggcaaat tgcgctgatc tggattgctg aactggcggg gcaattgatg acgttacaag
    10861 ccgcgtaatg cggcttaggc ggcagcagtt ctcagcaggt ctaatgccat ttgtcgctgt
    10921 tcgggtttca ggttattcaa caccgtttgc agcaactgat cgccggtttt ggcgctgggg
    10981 ctgagtgtgt gggaaaaggt cagattcatc acaaaggtgt agccgcattc cacatctgca
    11041 caggcacagt aaatgtctgc aatctgtcgg tgtttgcggt ttgttttgcg gataacggct
    11101 tttgagccgc actccgggca ttcaattttt aatacccgca tattccatgc tccggcctct
    11161 aaaacatggt taaattttaa cgttttatgc cccattacgc accctgaatc gttgtatcat
    11221 cggcaaaatc aaaaattaaa tgcagatttt gcggtatttc ggggtcttta ttgatggaag
    11281 ccataaaacg gcgctgaatg gggatcacct cgtctttgcg gtacgtgttc cgcgcctttt
    11341 ccgggtcgcc cagcccggcg gcgttttgcg ggatgatgcc gcacagccca gccgggaaac
    11401 ggtgtgcatt gagtacatcc tgggcgctga tgtttttcac gttggcgaat tcgtccttgg
    11461 cgctgatatc ccccatttga ataaattgca ccccctcttt gtcgccgttc gggatgttta
    11521 ccaggatggt ggagaaattg ccgatccctt tgctgctggc taactggcgt tcaatttctt
    11581 cctcgatctc gtcggtcata ttcgggtcgc tggtgtagag gataccgccg gtgtgtgcgc
    11641 cgttgtggta gtagcggcgg cgaaaaatca ccgcttcact gttcagcagg gccgagtgaa
    11701 taccgccgat gtaatccggc aggccgtaga tctgctgttg tgggtcgtac atcttgatga
    11761 aaatcacgtc ttccggcggg taaaccagtg gttctccttt ctgcaatacc acaaattccc
    11821 cggttttacg gatgcgggta tacagtgcgg gtagcggcgt cagggcgatc acctctcccc
    11881 agccattgcg tactttaagg atggcgatat caccaaaggt caggtagtcg aacgcagcgg
    11941 ccagcatgtc atcgtgagac agaccacccc cctgataatc cgatgccacc atgttccggc
    12001 gggcatagag gataccgccg tgctggccgt tcaggttgac cagttgagcc agggcgagcc
    12061 ggtctatcgg cagggtgtag tgattaaatt cattgtcata ccacacatcg cggtaatcgg
    12121 tgccggtggt taataccggt tccggcttgc cgaacgtgat aatactcatc tttttacgcg
    12181 gggcgttttg tgccttctgg cggcggtgtg atgtcctttt catgctgctt ttttcagtct
    12241 ccatcgggat tggggtttgt tctcatagtt cagcggctcg ttatccagcg cgtgcgcgat
    12301 agcgaagaag gcttcggcat ggccggtttc cgcgctgcgg tcggcgatga acgtcatggc
    12361 gttgccgctg gccgtggtgg tgcgccgtat cgccataaat gatgccggga tagccttttc
    12421 atcctgatcc cactcaatgc gctgactttc caccacgtcg gccgctttca tcaccagccg
    12481 gtttttggtt tccacgccgt agcggatagc cgttgcctgc cgcatggcaa agtgctggat
    12541 gttctcaaac accccagcgc caatgccggt cacatcaatg ccgatatagg taaagtggta
    12601 acgctggaac agctttttga tctggttggc ctgataacga aagttcatgc cgtgccagtt
    12661 gacgaccagc aaaacgcgga atttctcgcc gtcgtaaatg ggcggggcga cgatcacaag
    12721 cgtggacagg tcgccggagc gggccgggtc gtagccgccc catacctcgc ggttgccgaa
    12781 cggacgcggc gcggtcgggt cgtgatcctg ccaggtggcc gggtctacgc cgcagcgctc
    12841 caggtcgtca aagctgaaca ccgcgtcttt gttgtccaca aacacgcaca tatacagcat
    12901 gttgaacgtg tccacgttgt agcggttgcg cagtttttcc aggctggcca gattgaagcc
    12961 gccccggatc gcgtcttcca tcgtgataac gtaccgccac tgaccgtccg ggcagagtcg
    13021 cccgccgtcg cgcagttcgt caaagccggg gaagttaacc ccggcgcgtt tcttgttgcc
    13081 gcgtttccat tcctcgcctg tccagaacgg gtacgcctgg tgcgttttag cgctgggggt
    13141 ggaaaagtag gttgtgcgcc atttgtcatg ggtggccatc gcgctggcca cttcgttaag
    13201 acgggcaaag ttcggcaccc aaaagtattc atcgcagtac agatgcccgc tgtaagattg
    13261 cgcggtgttc ttattggtgg ataaaaagcg cagttcggca ccgttgctca ggcggatcgg
    13321 gttgccggtc agggtgatat caaaatactg ctgcgcaatg ttgacgatgt acgagcggaa
    13381 aacttctgcc tgggcgcgac ttgctgacag gaagatttgc ggctcaccgg tcagcaccgc
    13441 attttcaaag gcttcaaagg caaaatacca ggtggctcca atctggcggc ttttgaggat
    13501 attacgcacc tgctggccga gattcgtgcg caggtgtttt tgatagccaa acaggtgttc
    13561 atccgcccag gcgtcaaagt cttctttggt caggctggaa atgtcatttt tgcggtactg
    13621 gcgctttttg gccgggcgtt catcgtcgtc attactacgt gaaccgggcg tgttgccgtg
    13681 accggcagcc gcgagttttt ctttgtgctt attgctttgc gcccgcagtt tgacggcgtg
    13741 ggcgatcagc atgtccattt cctgcaattc cagttcggtc tttttatccc gaccggccag
    13801 caactgataa cggcgctcta ttgcctcttc ggtactttcg gcgctgagta aatccgccca
    13861 gccgaatttt tgcgcccaat agtaaataat ccgcgcattg ggcagattta aatcagcggc
    13921 aatttctttc ggtgtggctc tttttaaata gagcagccgc gcaacaccga ttaattcatc
    13981 agaatattta gccatgccgg tattatgcgg cgcgattttt attttatgac cggtgtttat
    14041 ttcgctgtgt tcgtcaaagc gtcgttatcc gaatagaggc gaataaagcc ggtcgctgcc
    14101 ggtttcttat tccgtaataa tgccgttgtc cgacagaaac ggagtatgtc aatgtctcag
    14161 ttaatgacta actggatttg tatcgccacg gagggggaaa cggtcgataa gcgggtaatg
    14221 gaaagacagt ggctcattga tgccgctgaa acttatgacc cgcaattcta tgcggccctg
    14281 atttggccgg agcatgaaac atggttcggc aatatgggcg aagtgctggc attaaaaacc
    14341 gaaaccggtg atgacgggct gttgcgttta ttcgctcagt tacgcccgaa ccaccagcta
    14401 ttacaggcta accgggatgg tcagttgctg ttttgctcgg tggagctaac gccagacggg
    14461 aatttccgtg gtacggggaa aacctatctt gaagggctgg gtgtgaccaa taccccggcc
    14521 agcgtgggaa ccacgcggct acgtttcagt agcaaaaagc gcggccgttt attcggtgca
    14581 ttaaagccgc tggttattga tgaagtaaaa gaaatcaaag ggaatagcat ggcaagtaaa
    14641 tcatggcata gcctgttcgg tattaagccg aagaccttcg ctgaggacga aggcgaaaat
    14701 aacgaagcag gcggtgacga taaattgcag gcactggcgg aagcgctggc cgaactggaa
    14761 tcccgcgtaa ctgcgctgga aagtcagcaa agccagacca acgacgccgt ggaagccgtc
    14821 caggacgatg tggatacggt aaaagaggtg gtggataccg aagatttcgc cacgctgcgt
    14881 aataacctgc cgaagatttt gaaaaatttc ggcaagctgg atcgctctat tactaaattg
    14941 ccgcagcgtc aaattggcaa taaacccaaa gggtttaatt tcctgtaatt ccatttattg
    15001 ggtgatacct ctttttttat ctcgatatcg agaggacgca ttatgttttt aaatcagcgg
    15061 gcgcgggaat atctgagcgc ctacagtgcc ggtctggcgc aggaatatgg ggtagcggat
    15121 accgcccgtt atttcgcgct gaccgacccg aaagaaaccc agcttcgcgc tgccctgctg
    15181 gaacgcgtgg atttcctgtc catgattaac gttctggatg tggatcaact ctccgggcag
    15241 gtggtgtccg taggcagttc cgcgctgcat accggccgta aggaaggggg ccgttttatc
    15301 cgtcaggtcg gtgtggaagg caatgactat aagctggtcg agaccgattc ctgtgccgca
    15361 ttgccctggg atctgctgtc ggtgtgggct aacgccggtg gcgaagacga gtttttccag
    15421 ttggtacagg cgttttcaaa tgaagcgttt gcgctggata tgctgcgtat cggctttaac
    15481 ggtaacagcg tggccaaaag taccaacccc gacaaaaacc cgaacggcga agatgtcaac
    15541 attggctggc atcagcgcat gaaggatttc aaagatgggc aacaaattat cactgaccgg
    15601 gtggtactgg acgaaaacgg cgattacaaa tcactggatg cgatggcctc cgatttgatt
    15661 aacgccaaaa ttccccagca ataccgcaat gacccgcgtc tggtggtgct ggtcggggcg
    15721 gatttggtcg ctgccgaaca gtatcgcctg ttccagaagg ccgaccgccc gaccgagaag
    15781 atcgccgccc agatgctgga cagcaccatt gccgggcgtc ctgcgattgt gccgccgttt
    15841 atgccgggca aacgcatgac cgtcaccacg ctgtcgaacc tgcatatcta tacccagcgt
    15901 aatacccggc agcgtaaagc cgagttcgtt gaagaccgca aacagtttga aaacaagtat
    15961 ctgcgcaatg aagggtacgc cgtggaatac ccggaactgt atgcctcttt tgatgaaagc
    16021 gccgtcactg tcggtaccgt ggccgagcct atggaaaaac cggccggagc gtaaccgatg
    16081 gccctgtcac ctgcacaacg tcataacgcc cggatggttg ccgagcagca gctatcccgg
    16141 tgccaggcgg tatccggcga tcacagtctg catgtgcaac gccgtgcgct ggaaaacgac
    16201 gtggcacggc tgcgcagtca gcccacgtta cgcgacaggg tagagatgaa acgccgggag
    16261 ttgctgccgc gctggctgcc aacggtacag cgctatctgg acagcggcga ggtgtatcaa
    16321 aacccggtgt tcgcacattg cgtggtgtgg ctgtttgatg tggaagagtt tgatcagggg
    16381 ctggcgtggg cagatatcgc cattgcacag ggacagagca cccctgacaa catccggcgc
    16441 acgttcgcgg cgtttgttgc cgatacggtg ctggcctggg cgcagcagac ggcggacatg
    16501 gggcagagtg tggagccgta tttttcccgc acgtttaaga acgtggcaga aaactggcgg
    16561 ctacatgagg agatcaccgc taaatggttc aagttcgccg ggctgttact gctgcgtgat
    16621 gagcaggggc aaccacgggc aaccgcagcg gcggacattg acacactgac ggcggcggat
    16681 gccctgttac atcaggccga gcagttttac cgccaggttg gtgtaggcac gatgcgccgc
    16741 aatattgccg cccgcattcg ggcgctgcaa aaggaataaa agactaccgc aagccgggcg
    16801 ggcgcggctg aggcaatgca ccgggtgtgc gatgtgccgt ggaagccggt cagcccgcct
    16861 ttttacgggg gatgcatgtt cagtggaaca ccggttgatt atcaggatga acaactggcc
    16921 aacaatggat tttggccaga cctgaacgtc agggattttc agtcacagcg caccatcccc
    16981 gccgatctgg ctgccgatac cgtcgcacag gcgctactgg cggcggtggg cgaggtcaac
    17041 gctgatctgg ctgaggtgga ggcccgcagc cgggcgaagg ggtttgcgcg ggcgcaggat
    17101 gtgccgggtg tcagcctgaa aggccagaac gtgctgtgtg cgcagtatca aaaagcggtg
    17161 tttgccaggg caaaagccga tttgctgggc gagtttgcca ccattggccg ccgcgagtct
    17221 catccgggac aggaggggga cgacacacgc aagggattgc tgggggaagc ggcgatggtg
    17281 atccgccgca tgaaagggct gaaacgggcc acggtgcgga tggtatgagc aagctggatg
    17341 acctgaccac ctttgtttcg acgcatttgc cgccccgcgt gatgcagggg tttgacagct
    17401 tcatggatga agtgagcttt attcccgccc gccgtgacct gggcgaagac cagtatcaac
    17461 tggcggtgat gaagtttgat gctgtgttga gctgggagcg ctggccatac cgggtgtgtg
    17521 acccgcgcaa cctgtgcgct ctgttactgg tctggcagga ggggcaggac gatgtgccgt
    17581 acatggatgc cgggctggat atggagttgc ccacactgga tgtggacgtg cgcgatcagg
    17641 atagcgcgat tgtcgtggtg tcgctgcaac tggcggaatc actggcgatc gtggctgatg
    17701 acgacgggat cattccgttt gatggtcggc gctggcgtct gaccagcccg gaaatctggc
    17761 aggccacatc agggcatttg ttcggtgcag gcggcgatgg ggcggaggtc ggagcgtcat
    17821 gattgtgcat ggcgagctga gccagtcaca actggccgaa ctgcgcaccg cattgcaacg
    17881 gctgacgctg ccacccaaaa aacgccagcg tttactgtgg cggctggcga aatacggggt
    17941 gattgcggcg gcgaaacgga acgtccgggc gcagcaggca ccggacggca gcgcctggac
    18001 ggcacgacgc ggccgccgcc gtggcaggat gctgcgcaat ctgcccaacc tgttgcatat
    18061 ccgcgaaatg ccagagattc aggcggtacg gatttatcta cagggcggtg cgtatcgcaa
    18121 cgggaaaacg ccggtaccgg cgggcgtggt gggctacagc cagcaaaacg gcatgagtgt
    18181 atccgtcaag cgttcacagg tcggcaatgg acgccctgag ccgggacgga tggccacacg
    18241 gcgacaggcc cgcaaactgc gggcgctggg gtaccgggta aaacgcgggg cgcgatggaa
    18301 aaagccgcct taccgggaga ttgaggaaac cctgagcttt gcacaggcgg gattactcat
    18361 ccgtaagttg agcggcaagg cggcaaaaac cgcctggaca gtggatgttc ctgcccggcc
    18421 atttttgggc atgaacgatg cggagtttac aaaagcgctg gcacggcagc tacagggcat
    18481 tggctttggc tgggatgtga aagcgcagga tatcaagggg taagcatgag ttggccaacg
    18541 gttcaggtta accaggtaaa ccagctacaa ggcgaaacca gcgagattga gcgcgtggtg
    18601 ctctttatcg gtgagggggc ggtcgatgcg gtgaaaacag tgccggtgaa tacccaaagc
    18661 gatctggatc aggtgctggg ggcggcggat tcggtactga aacgtgacgt cagtgccgcg
    18721 atggtcaatg cggggcagaa ctggagcgcc tttgtttgtc tgctgccgcc aaaaggcgac
    18781 tgggtgagcg cggtcactgc cgcgcagcag gtggccagtg ttgaaggtgt cgttgtctcg
    18841 ttgcctgcca gcaaaaacag tatcgcccag gcggccagct tacggtctgc actggtgtct
    18901 aaatttggtc gctgggtgtg gtttctgctg gccattgacg ggccgaaaga aggcgagggc
    18961 tgggacaagt atttacagag cctgagtaat ttacagaacg gcgctgcggc tccggcggtg
    19021 caactggtgc cgcggctgtg gggcaatgag ccgggcgtgc tggctggccg cctgtgtaac
    19081 cgtgcggtga cgatcgccga cagcccggcg cgggttcaaa ccggtgcctt gctggcgatg
    19141 gggcgcacgg atttaccggt ggacggtacc ggcgtgatgc tcgatctggc gatgttacag
    19201 gcgttggaaa aacagcggta cagcgtgccg atgtggtatc ccgactatga cggctactac
    19261 tggtcagatg ggcgcaccct ggacgtggaa gggggcgact atcaggccat tgaaaacctg
    19321 cgcgtcgtgg acaaggtggc gcggcgcatc cggttgcagg cgattgccaa aattgccgat
    19381 cgcagcctga acagtacgcc gggcagtatc gccgcacatc aagggtactt tgccaaaacg
    19441 ttgcgtgaaa tgtcccgcag tacccaaatc aacggcatca cctttccggg ggaagtgaag
    19501 ccgccgaagg atggggatgt ggtgatcgcg tggcgctcta aaaccgccgt ggaaatttat
    19561 ctggttgtcc gtacttacga atgcccgaaa gggatcacgg tcagtctggt gctggatatg
    19621 tcactggagg gtagcgcatg acaaaacgga tttcgggcca gtcgtttgac ttcaacatgg
    19681 acggcgcact ggttcacgcg gaaaaagtct cgctgagcat cacggataac accgccgccg
    19741 cgcagacgca gggcatcccc gatggctggg tggccggtga cgtcgccgcc gaaggtgaaa
    19801 tggagctaag taccaagagc ctggcggtgg tgacggcgaa agccagcagc gccgggtcat
    19861 ggcggggtat cgagccggtg gacttgatgt ggtacgccaa ggcgggcagc gaggaaatga
    19921 aggtggaagc cttcggttgc aagctgatcc tgagtgacat tctggatgtt gacccgaagg
    19981 gcggcagcgt gatgtcacac aagattaagt ttgtggtcac cagcccggat tttgtgcgca
    20041 tcaacggtat cccctatctg gaatcggaac tgacggaaaa gctgatcggc taaggacagt
    20101 catgcaggaa tacgaaaaga acgcgctggg attactggtg ctgggtgcgc tgattgcgct
    20161 gggtaagctg ctggccagtg atgaaaaaat cacaccacgc ctgtttttcg gccggatgat
    20221 tttgggatcg gccacctcaa tggcggccgg ggcagcgctg gtgtgggtgc cggggttgcc
    20281 gccgatggcg gtcaccgggc tgggtgcggc gctgggagtg gccggacatc aggcggttga
    20341 aatctggctg cgccgccgtg gtagtagttt gctgaaaggg agtgacgcaa aagatgacgt
    20401 taagtgaaaa acagcagtta tttacccaac tggtcgcaca gctgatccag tgggcgggag
    20461 agcgggggta tcgcctgacg ttcggcgagg cataccgcac accggaacag gcaaaactga
    20521 atgcccgcaa cggctcaggc atcgccaaca gtttgcatac gcaacgtctg gccgtggatc
    20581 tgaatctgtt tatcgatggt gaataccaga ctcggacaga agcctatttg ccgctcggtg
    20641 aatactggga atcgctgggt gggtgctggg gcgggcgctt cacctcacgc cctgacggta
    20701 accatttcag cctggaacac aacggggtgc gttgatggat gggctatggc gggttgtggc
    20761 tgggttggct gttgcttttg ccgctggctg gctggtggcg agctggcagc gggatagcgt
    20821 tgatctggcg gtaacccgcg ccgctaccgc cgctgctgag caatcacgcc aggcgttaca
    20881 ggcactggcg agccagtccg gcgcagcgct ggaatccaaa ctggaggcat tacgcaatgt
    20941 gccgaataaa accgtttacc gggagatcgt taagccggtt tttactaacg tgtgcctgtc
    21001 tgctgaattt gtcagcctgt acaacgacgc cgttaatcac accgaacgtg tcttatcagg
    21061 aaaacctgaa aaagaaatgt ccggtcaata atctgccgcg cttatcaggt accaccggca
    21121 atgatgcggc gcagccgtta atcagttggc cgcaaattta tgcggattgt gccgcccggc
    21181 ataatcagtt aattgatgaa ataacccaac gggaaaacat gcaatgagca aaattacctt
    21241 atctgtttct ggcaaagagt tgtcgtttga accgaatacc gtcgcctata acggcatgat
    21301 taatgatatg gcaatggata ataaagtggc tccggcggtg acgtatcttc gccgtattgt
    21361 cgtagcaaaa gataaagaaa cgctggatga attattaaaa ctgccgggtg ccgcattgca
    21421 aattaccgaa gcggtgaatg cgcaatatgc accgaagctg gaaatcgaag taaaaaacta
    21481 acccagcggc tgcgggccat cgaaaataat tttcttgaac aggcattaac cctgcgacgg
    21541 cattatttac cggctgaaaa tgatgacgcc gataatctgg cccgcgccgt ctggctggca
    21601 aatacacact gggaaaatat gcgtatttcc gtggcgaacg ggattgcgct ggcattaaaa
    21661 ggcgattcat gaagcaactc gattttacat taagcctgat tgataagctg acccgcccgg
    21721 taaaacaggc gcaggcggcg gtcaacggtt ttgcgaaatc gtcgcgggac gccttttcta
    21781 aaatcgcggt tggcggtgcc gggcttattg gtaccgctat gtctatccag ggtgcgcttg
    21841 gcccggcggt agagatgcac ggcgcaatgg tcgaagcgtc ggcgcgtggc gtggatgatt
    21901 ccgccttgca gaagattaat gccaacgcgc tgaaattcag cacccagtac gggcgttcgg
    21961 cgctggagta tgtgcaatcg accgcccgga ttaatgcagc ggtcggcacc ctgaccaaag
    22021 aggatttgcc gggggtagtc agggcatcca atttgatggc ggcggcgctg aaagccacgg
    22081 cggacgagtc gtccgaattc atggggcaga tgttcgccaa ctttcgctct gatgccgagt
    22141 caatgggtaa tgtgcagttt gcggagcaac tggccagcaa ggccgcctat atgcgtaatg
    22201 ccttcggtgt tgagctgggg gcgataaaag acctgatgga aggggcgcgt ggggtcggca
    22261 ccaactatgg cattggtatg gatgagcagt tggccgtgat gggcgaacta cagcgtacat
    22321 taggcacgga agcttccagc tcttacgaag gctttttgtc tggggcggtt aaaggggcta
    22381 aaaagttggg gctgtcgttt gaagatgcca acggcaagtt actgacgatg cccgcgatgc
    22441 tggagaaatt gcgcgggaag tacggtgcca gcattgaggg taatctgaaa gcccagtctg
    22501 atctggatga tgcctttggt gacagtgcgg cggtcattaa gcagttgtat ggcaatgtcg
    22561 gtgccctgca acggcatatc accgaactgg gcagcagtga cggcatgaag cgtgccacgg
    22621 aaatggcgca gaagatggcc agcccctggg aacggctgac ggctatctgg tacgccattc
    22681 gcgccgcgat gggggccacc ttgctgccgg tgttgtaccc gctgatcaac aaaatggctg
    22741 atggcggaca ggtgctggtc aggtggctga atctgttccc gaatatcacg cgggtgatcg
    22801 gttattgcgt actggcggtg atgagcctgg cagcagccgg ggcgctggtc aatattgtgc
    22861 tgggcgtcgg gcgctttgtc ctgatgggct tgcgtggtct atgggccgga ctgacagcgg
    22921 ttatcaggat ccatgtggtg gctatctggc tgtataacaa agccgtgctg gcgtgggcgg
    22981 ctacgatgcg tattttgcgt ggtgtactgc tggccgttcg catggccagc ctgttaaccg
    23041 gagtagcatt caatatcgcg ctgtggccag tgctgctgat tatcggtgcc gtcgccttgc
    23101 tggtcgccgg gtgttatctg cttattaagc attgggatgg cataaaaaac gcgattactc
    23161 aaaccgatat gtggaaaacc gttacggaaa aggtgcaatg ggttgcggag atatttggtc
    23221 aggcatggca aggcatcgtt gacggatgga accgtgttgt aaatgcgatg ggtaatttct
    23281 ccctgtctga gacgatggga aaaatggttg atggcgtcgg ggagatcttt tccggtttat
    23341 gggacggtgt tttagcgtcg ttcaatgcgt cttatcgctg gattgttgaa aagctaaacg
    23401 cgattccggg gatcaatatt gctatgcctg aatctgttcc ccgaccgggt ggtgagggct
    23461 tattaacggg cgggaaaata aaggggattg attcgggcgg actgcaacag gatatcagta
    23521 atagcaatgc gaagaattac accgacaaca gccggaaagt agaaaatctg acgatttatg
    23581 ccaataaagg atttacccct gagcaattaa cggaatggga agcactgcgg taatggatga
    23641 cgtgaaatat attgacctgt taattacaga acgtgatttc agcctgaatg cggggcgtga
    23701 gccgatattt tgcaataacc ggatcagtat tggtcaggat tgcgttcacg ccattattga
    23761 aagcggactg accaccaaac tggtggccga gcgcagcccg acgctgcggg ccgatgtact
    23821 gacacaaatg attattctgg ttgaagacga tgaacgaatt atccccggta cggtcgtggt
    23881 cagtgaagaa agcccgaccc ggctgtgggt gacggcggaa acctatgatt tcgggccgat
    23941 tacggccagg gtggacgtat gacggaaaag ccgaagattg attatgagca ggcgctgaaa
    24001 gaggccggga tgccggtgac ggccgagaag gtaacggaac agtttcaggc gcaagtaacg
    24061 gcatccggtc tggtcactaa cacatcgcgg atgtcgccgt tttggcggct gatctcggtc
    24121 atggtgacaa cgccggttat ctggctgaaa gacgttctga tcagcgtagt gctggccaat
    24181 atgtatctgg ctacggcgtc cggctcgttc ctcaatctgt tcgcctgggg tgtcaatctg
    24241 tcacgcaagg cggccacagc ggcatcgggc gttatccgtt tctataagtc ggatgcggcg
    24301 caggcggtag tgatcccggc ggggacgctg attcagaccg aacgcattaa cggcacgatt
    24361 ttcagtttgg cggtgtcagc ggataccgtg attaccgccg ggcaggccag cgctgacgtc
    24421 ccggtgatcg ccacggcgga aggtggtgca ttcaatctgg cccccggtta ttaccggatt
    24481 ttgccggtgg gggttgccgg tattgagcgg gtggagaatc aagaggactg gttgctgacg
    24541 cctggtgcgg atgaggaatc cgatgatgag ctgcgcgagc gttgccgcaa ccagttcaat
    24601 ctggtcggga attatcacac cgacgcggtg taccgcagca tgatagcggc ggtggccgga
    24661 ttgagcatcg atcggatttt ctttcagcat gacgccccgc gtgggccggg tacagccaat
    24721 gcttatctgt tgctggattc gggggtggta tcgcagccct ttattgatgc ggtgaatgat
    24781 tacatcacgg cgcaggggta ccacggccac ggcgatgatt tgcgctgtgt ggcgctgccg
    24841 gaaacacagc acgatttaac cgtgacggtc tatgtgcgca atctggtgaa catgacggat
    24901 gaggcgttag ccgccttgcg taccgggtgc caggatctag tccgctgtgc ttttcgggaa
    24961 aacaccgggt atgacgtgga aaagacgtgg ccctggtcgc gcttctcatt ttccacgctg
    25021 gcacaggaat tacacgacac gtttccgctg attgcgtcac tggatttttc cctgggcgat
    25081 attgtcagcg ggctaagtgt gccgcgtctg gcctcgctga cggtggtgat agccgatgcc
    25141 tgattttaaa gagcaactgg ccggcctgcg gctaccgtca tggatggata agggcgaacc
    25201 agccggcctg ttgaatgcca gcaaagccta ttggttgcag gtgaatgact ggctgcgctg
    25261 gccgttgcag caactggacg tcgatacctg tgcggagccg ttgctaaacg tgctggcgta
    25321 tcagcgcgac atttcccggc tgaaagggga agcgctcgat ctttttcggc ggcgggtgaa
    25381 gtacgccttt gtgaatgcgc aggacgcggg cagtgtggcc gggtttatcg ctatttttga
    25441 gcggctgggg attggcactg tcaccctggc cgaacgtcag ccagggtatg actgggatgt
    25501 gatcctggtg cgtatcaacg atgagcagtt aagcgggtat aacgccttga tgatgagtct
    25561 ggtcaggcag tacggccgca cctgccgccg ctatacgttt gacctctcga atggggaaac
    25621 ccagtcagtt cggggcgggg agtttgagca caacgcagaa tactaccacg caatcagttt
    25681 gatgccggtt ggaacgataa cggcgcgtgt tgcgttgcgt tatgcgcgcg catccgcttc
    25741 gacagaatat tattcagcca acgtgtaaga gggattatgg cgcagagtgt gattacccat
    25801 gcgtttgaaa cgtggaatgt tcagcgggtt ttagatggcg tggcagcccg gcccgataaa
    25861 gtcgtttttg cgcggatacc gggtcaggat gaatcggtgc cggtagaccg aaacgaaggg
    25921 ttaccccctg ccgatcagat tcagcatacc gccgccatta cccaggcggg tgttctgaat
    25981 gaaaacgccg tggtttattc ggtggtgctg gataccaccg tgggggattg ggattacaac
    26041 tggatcggcc tgctggacag ccaaacgaat accgtgttga tgattgtgca tgtacgcacc
    26101 cagcagaaac tggcgacccg aaacggccag cagggcaaca gcctgacccg taatctcatg
    26161 atgcagtttg atggggctgc cgctgccaca caaatcaacg tgacagccga tacctggcag
    26221 attgattttt cagcccgtct ggcggggatt gatgagcgta tccgcattga aaatatggac
    26281 aggtatggtt catccgcgtt ttttggcaat gcatatcagg ttgtcaaaga tggcaatgcg
    26341 tatgttgtaa aagcgggggt agcctatgcc gctgggctta ggacttcgct gtcgagtgat
    26401 ctaaaaatta cggtggatgc attgccgact cgtgtctttc tggatgtgtg ctggcgtggt
    26461 gaattcacac aggcatgggc ggttgatagc cagatcgttg ttgccaactc ggcagatcat
    26521 gaaatacgcg atggtgttca gcactatttg cttcctgtcg cggatattga tgaaaacggc
    26581 aatatcaccg actggcgtaa acaaggaagc ctggcagaac aaaatgcgca gaccctctat
    26641 cttcgtaagg acgataatct ggccgcatta cgtgataaag aagccagccg aaaaaattta
    26701 gggttgggtc agcttgcggt aatggatacc gacacagcca gacaaacgct tcgtatcacc
    26761 caattagaaa atgaactggt aggtatcccc ttgccttatc ccggtgcaac agcccctgac
    26821 gggtggctga aatgtaatgg gcagtccttc aataaatcga tgtatcccct attagctggg
    26881 cgttacccgt cgggtttttt acctgacctg cgcggtgagt ttatccgtgg ctgggatgat
    26941 gggcggggcg ttgatgtcgg gcgcggttta ctgtctgcac agacccaggc tattcaagac
    27001 catagacacg ttggcacgat ggtaaacagt aatccgctac aaaccggtat gaataccggg
    27061 atcggtctgc tgtcccaata tacccctaca ccaacagtag gctattcaaa cgaaatcagc
    27121 agcggtggaa cggtggatgg gagtaaagaa acacgcccgc gtaacatcgc ctttaactac
    27181 atagtgaggg ccgcataatg cgaaataatt cggtaatggc gaatgaaacc acgctggacg
    27241 aaaacgggca cgcggtatcg tctggctgga tcacggtcta tcacgttgat gcgtcaaccc
    27301 gcgaatactt gggaaacagc caggaatatc tgttggtcgg tacgggtatt ccggctgaca
    27361 gctatgcgga cacccccgaa ttacccggca ccggtcaggc gctatgccga acaactgacg
    27421 ggcaacaatg ggagtatgtg cctgattatc gtggggtaac cgcatatcac acggaaaccc
    27481 gagagccttt taccgtagcg tcgctaggtg agttacccgc gtttgccacg ttgcaggctc
    27541 cctcttccga gtttgacgtc tggagtggga aggaatgggt aacggataag gatgtgcaga
    27601 aacaggctga gattattgcc gctcaacggg atcaagggct gcgattggag acggctacca
    27661 cccgcatcca gatgttaggt gatgcggttg aactgaatat ggctaccgat gatgaggtag
    27721 cggcactgaa tgcctggaaa gcctatcgcg tattgctaaa tcgggtagat gtaaatgccg
    27781 ccccagatat cgactggccg gaggctccgg cggtatgaca tggcggtgcg ctgatatctg
    27841 cctgacgtcc gcactgccgc cggtgacctg ttcggtgttg ccggttcatc cgtgggtcta
    27901 tggcgtgggc aacgtgaccg acagcggtca ttatttaagc ccggtcaatg cggtgactta
    27961 cctggctgac aagttaggcg ctgcggcgga taacgtggcg gtgtgcgtgt ggatggtctg
    28021 cgggaacggg ctgggggaat ttctacaggc gctggaggca ctggcggagg tttttcccac
    28081 cccggtattg agccaggttg cccgacaggc gcgggctatg gcggagttgt ccacggtaaa
    28141 gatgcaactc ccggctaaaa gccgcacgtt gcccgctgcg gcgctgttgt cggtggcgac
    28201 ctgtcggcag gcattgactg cccagcgtat ggcggttgcc cagcagcagg ctaccgcgcc
    28261 gatggggctg gatgctctga aagggatggc agagcgcttt gcatcccagc gcgatgccgc
    28321 cttatcggaa atcagccagg ccatgcagca gatggcacaa cgccgcgccc cggcgtgggt
    28381 ttttaccggt cgaggcacgc cgggtgtcat tgccgtcgaa atgctgaaaa atattcctcg
    28441 tccgtctgcg atttataccg ctgccatgat gtttacaggg acagaactgg atgccttgga
    28501 gagcatgatc cgtgagccag ataattacgc tcgcccttga tggcgaagct atccccctgc
    28561 gtggcctgac cgtcacgccc tcaatgcaat ttgaagaaaa agaccagtcc gggcagacgt
    28621 ccagtacggc caacgcggaa cagggtatca agcccaaaga gctgcgtgtg tcaggcgtga
    28681 tcccgtttac cgaggcgaag gtgttaaccc ggctgtttgc cctggctgaa gccaaagagg
    28741 gcaataagct gaaacgctac cgggtggcca accctaccgc gcaggcgatc aatttccgac
    28801 tggctacctt taccgggtcg attgacgcac cgaagcagga cggcaagcaa gcctggctgg
    28861 tgacgtttac gctgcgggaa catatcagcg tatcggaaaa gcgggatgcc cgcgcaggca
    28921 atcagacaga aacgaagaag caggcaccgg gtaaggggag cgatgccggt gaaagtgatg
    28981 aacaactgag ctggtttgag cgcaaagtgc tgaaaccggt gaatgatgcg ttggggtaag
    29041 ccatgcgacc gattacacga ctgatgttat ccggtgatgc ggtacatgct gtagacgtca
    29101 atatggtact ggagttaaac gcctgcggcc ggggatttat cacagcggag acgcagcagg
    29161 actataccgg caagctggtc aggctggatg tgggctatac cgatctggta ttgcgctggt
    29221 ttaccggtta cgtcgagcgg agccagccgg ccgaaaacgg ctatcagcgg ctgtttgtgc
    29281 gtgaactggc aggtgtgttt gaccggatgt ggccatgtgc atttcagcac ccgacgctca
    29341 ggcaactggc tgactggcta agcgagcaca gcgggttaac ggtgcatctg cctgatgccg
    29401 ggtatgtcag ccaacctatt ccgcatttta cccatagtgg cagcggtcat cagttgctgg
    29461 ccaacattgg ggcggcgttc gggattgatg attacgtctg gcaacctttg ccggatggcg
    29521 cgttgtatct cggtagttgg gatgattcgt tgctggccgg tgcgccggtc aacatcccgg
    29581 ctgagttcag ccaggcgcag gccgccggta atagcatgac gttgccgctg atacagtcag
    29641 ttcggcccgg cgcggtggtt aaccagcaac gtctttcccg cgtacagttg ctcaacgaaa
    29701 acatgacgat cgagtgggta ccagtgagca ctgtcacggg cagggcggca cagcgcagcc
    29761 ctgcccagcg tcagatcgac accgcttatc ccgaactgtc ggccggattg cacctgccga
    29821 agtttgcccg cgtggaagcg ccgtcagaag cggtcagcag cggtaatatc gctgaccctt
    29881 tccggccccg ttatgcggtt gacctacagt tactggatgc ggacggtaaa ccggcaaaag
    29941 atacgccgtt atatccggcg gtaccgctgc cggtaccgat ggccgggagt gaggccgggc
    30001 tgttccagtt tccgccgccg ggtacgctgg tggaagtcgg gtttaccggt ggacggccgg
    30061 ataagccgtt tgtgcgtcag actgtggcca gtggtcagtc cctgccggat atcaagccgg
    30121 gggagcagtt gcagcaacag cgggcggagg tttcgcagcg tgtgacggtc gccggggact
    30181 gggaacggaa gacggatcag gctatcaggg aatcgtcaat gcaccgggag gtgagcgccg
    30241 atgaggagcg gcgcacgctg gttaccaggg aaaccctgat taaagcgacg gataacgcta
    30301 cggtgctggg tacccacata ctccaagccg gtgccatcgt gcaaatcgcc cagggggatt
    30361 acagcctggc tacgcaggcc ggttatacgg ccagtgtggg ccagtcagcg acggtagagg
    30421 tagggcaatc gctgaccgag aaaatagggc aactgcgccg cagcattgcc ggtgcgcgtc
    30481 aggaactagt ggccccggtg gtctgggtcg gtagccaaca ggtcaacgtc atgacgctga
    30541 tgctggacac gctggacgtg attcaggaac tggcgacgca gacggccagc cacacgcaca
    30601 ataataccgg caccccattg aatgcgggcg agatacagca gaccggccgc cgcaccggca
    30661 cactcaaaga caagtacagc ccgataatcg gatgatcgat ctctacctac ccagcccgcc
    30721 gcgtgcgggc ttttttacgc cccctcgcct gacgcgctca gcgggccgct gagccacgcc
    30781 ctttcccggt tacctcgccg ccatgccaac accttgcgcc actgcctgta ccctgctgac
    30841 gcagccagcg caccaacaaa atgaacgctc acatgacaaa atcggcacta caccgcaccc
    30901 gcctgcggtt ttcggatcgc aaagattttt cagttttgtt tttctacaaa acccaacgcc
    30961 agcccgcgcc gctgccgggc ttttgcggga gagcgtccac tgaaaacagt gaaatgaatt
    31021 tcagcgtttt tcagcttttt ggatcaggaa aggatcgctt ataaattgca accataagaa
    31081 ataaaaggat tttgtgtgga tttggtcagt ttgaatggat ctctgaatgt gagtaggcgt
    31141 tatctgtagg tcacagtatt tgcagcaatc atgcgggttt gggtgtgatg aggctgcttg
    31201 caggaactga aaaggagtga accccgccag ggcggggcga ggtgcttaaa gtttgccttc
    31261 ggtaatccca aaatcgacga tgctcttacc ttgaaggtca taggtgcagt tgtatgtcat
    31321 cgtgattttt gcgttgaaac cgttggtaaa tttcactttg tcaccgatga acgtcatttg
    31381 ttttttggct tcgttcaggc ggaaatgtga aaacatgggg gtcatcatgc cgtcagtcca
    31441 ttcgaaatca tacttggatg acttttctat cagaggacgg cagcgtgatg ctgcttcaat
    31501 ccagttttta tcaaacaagc attgaccgtc atttgctgcg caattctttg gggtgtcggc
    31561 ttttgcggcg ggcttgttgt catcacttcc gccaaagatt tttatagctc cccaaaccag
    31621 taacaccaga actacaaaac caccgattgc ctgacctgct gtggtaccgg gattcttaac
    31681 gccgcagtgc gggcagactt ttgcagaggt tgatacttct ttcttacatt ctttgcattt
    31741 tgttaaagcc ataaaccaag tcccatttga ttcaaagaag ctaaataata tgacaagcaa
    31801 tgggggaagc tacagagaag gctgcgcgta tgatgaaagc ctgccgccat tttgtcgcta
    31861 caggtaataa aaaaggggtt ccgttttcac gtaacccctt gatttaattg gtggagctgg
    31921 cg
//
