# Supplementary material for: May the Phage be With You? Prophage-Like Elements in the Genomes of Soft Rot Pectobacteriaceae: Pectobacterium spp. and Dickeya spp
Source: Front Microbiol. 2019 Feb 14;10:138. doi: 10.3389/fmicb.2019.00138 (PMC6385640; doi:10.3389/fmicb.2019.00138)
Supplement: Supplementary file 2 [file Data_Sheet_2.ZIP › Supplementary_prophagesGENBANK_files/Genbank FILES _SRP_prophages/phiDda2.gb]

LOCUS       Exported               54468 bp ds-DNA     linear   UNK 02-AUG-2018
DEFINITION  phiDda2.
ACCESSION   .
VERSION     .
KEYWORDS    .
SOURCE      phiDda2
  ORGANISM  phiDda2
REFERENCE   1  (bases 1 to 54468)
  AUTHORS   .
  TITLE     Direct Submission
  JOURNAL   Exported Aug 2, 2018 from SnapGene Viewer 4.2.3
            http://www.snapgene.com
FEATURES             Location/Qualifiers
     source          1..54468
                     /organism="prophage phiDda2"
                     /mol_type="genomic DNA"
                     /note="/genome_id=6666666.356868"
                     /note="/genome_md5="
                     /note="/project=robertczajkowski_6666666"
                     /db_xref="taxon:6666666"
     CDS             complement(1..1854)
                     /codon_start=1
                     /product="VgrG protein"
                     /label=VgrG protein
                     /db_xref="SEED:fig|6666666.356868.peg.1"
                     /translation="MANSTGLQFTVKVGALPETTFAVVDFELSEALNQPFALSLSLASS
                     QPGIDFGAVLDQPCELLVWYEGELQRRVSGIVSRFAQGDTGFRRTRYQAEVRPALWRLG
                     LRTNARIFQTQKPDAIIGTLLEEAGITDFAFALRHEHAVREYCVQYRESDLAFINRLAA
                     EEGLFYFHEFEAGKHRVVFADDAGALTKGPELFFNLATQGLSEGAYVRRFRYAEAVSTA
                     EVALKDYSFKTPAYGLLHNRMSSELDHQRESYQHFDYPGRFKQDPSGKAFTGYRLDALR
                     AGAMTGSGESNAAELRPGGTFTLTEHPNPAFNLAWQVVAVTHSGQQPQALEEESGGEPT
                     TLSNSFEVVKATTTWRAAMPYKPMVDGPQIATVVGPAGEEIYCDQYGRVKLQFPWDRYG
                     ASDDQSSCWVRVSQGWAGGQYGLIAIPRIGHEVVVSFLEGDPDQPIVTGRTFHATNPSP
                     YPLPASKTRTSLRTSTHKGAGFNELRFEDQAGQEEVFIHAQKDMNTVVLNNRSTSVNAS
                     HTENVGGDQTVVVQHNQTVSVKENQVTEIQGEQTVAVTKNRHTTVDDNESLQVKNNIAI
                     QSQSGDILIATAGGFIAIDKDGNISITGKGLVLNGTRIDLN"
     CDS             complement(1967..2485)
                     /codon_start=1
                     /product="hcp"
                     /label=hcp
                     /db_xref="SEED:fig|6666666.356868.peg.2"
                     /translation="MPTPCYISIEGKTQGNITAGAFTSDSVGNIYVQGHEDEMLVQEFN
                     HVVTVPTDPQSGQPSGQRVHKPFKFTVALNKAVPLLYNALASGEMLPTVTLKWFRTSVE
                     GKQEHFFTTTLTDATIVDINNQMPHCQDPSKQDYTQLIEVSLAYRKVDWEHTVAGTSGS
                     DDWRAPIEA"
     tRNA            complement(3120..3192)
                     /product="tRNA-Asn-GTT"
                     /note="/transl_table=11"
                     /db_xref="SEED:fig|6666666.356868.rna.1"
     CDS             complement(3302..4093)
                     /codon_start=1
                     /product="Inner membrane protein"
                     /label=Inner membrane protein
                     /db_xref="SEED:fig|6666666.356868.peg.3"
                     /translation="MMKWQWKSPTPDAFSDWQQALSIPLLTPLAETERRHIVMLSRQFL
                     RQKRLVPLQGLALTELMAQRIALLFALPVLELGIEWLDGFHDVLIHPEPFMVDGEWMDE
                     FGLVHSGPSVQSGQSWDQGPLVLNWLEIQDSFDLSGFNLIIHEVAHKLDMRGNERPSGV
                     PAMPLRDVARWEQVLHAAMEELREEIELVGEDAASMDPYAATDPAECFAVLSEYFFSAP
                     DLLAERFPAVYQHFCGFYRQSPLERLQHWQANPPQVDLSPE"
     tRNA            4188..4274
                     /product="tRNA-Ser-CGA"
                     /note="/transl_table=11"
                     /db_xref="SEED:fig|6666666.356868.rna.2"
     CDS             complement(4378..5394)
                     /codon_start=1
                     /product="Mobile element protein"
                     /label=Mobile element protein
                     /db_xref="SEED:fig|6666666.356868.peg.4"
                     /translation="MGRKRLNPEDNKLPPRVRKNKYSYIFKPAKTKETITLGKIRDLSI
                     AQVWEKYEKIISSKRDVMTFGKLWVFFLNSEYYKDLSPRTQSDYLQHQKKLLHAFGNAK
                     ADSIKPEHVRRYLDIRGKKSRTQANQEKSSMSRVYRWGYERGYVKTNPCAGISKFSVKP
                     RDLYIDDDVYMAIYNEATLALQCAMEIAYLCAARSGDVRDLEWAQEMDLGLFIQQGKTG
                     KKQIKAYTDRLRAALNKAKELGGSRYIIANSKGGKYSKSGLNDLFRKARSAASEKLGRP
                     LTCHFHDIKAKGISDYEGSSRDKQLFSGHKTEAQVITYDRKVSVSPTLDLPLINNDE"
     CDS             complement(5400..5588)
                     /codon_start=1
                     /product="hypothetical protein"
                     /label=hypothetical protein
                     /db_xref="SEED:fig|6666666.356868.peg.5"
                     /translation="MELTGYKYASGQIKILTRNGISFIPNKDGHPRTTWAHVNAVLNGT
                     PAPELEDDDAGINFDGI"
     CDS             complement(5569..5787)
                     /codon_start=1
                     /product="hypothetical protein"
                     /label=hypothetical protein
                     /db_xref="SEED:fig|6666666.356868.peg.6"
                     /translation="MYKKWQPGARLLSDFDLKIGRLTRSARNKTLTQQDIDKACADADE
                     IIKSLGKNNGKRKRHFKRRRFNGADGL"
     CDS             complement(5832..6005)
                     /codon_start=1
                     /product="hypothetical protein"
                     /label=hypothetical protein
                     /db_xref="SEED:fig|6666666.356868.peg.7"
                     /translation="MMKRTHHPHKPTYITLPDGRVGRIVTHRRADVFYDLPSDVRVSNN
                     PPGEKLIIDNQK"
     CDS             complement(6030..6530)
                     /codon_start=1
                     /product="Phage protein"
                     /label=Phage protein
                     /db_xref="SEED:fig|6666666.356868.peg.8"
                     /translation="MSTTAIAIASDMAKLQRLLEESDELTPEMIADTMLGMEMELGDKL
                     DAIMIHTRNLQGQAKTCDDEARRLAERKCSFENREKQLKKYALDCLLAAGLSSLKTPRN
                     TFTARKGVASVIIDNESLLPDELVTVQTLVAPDKKAIKEAIDAGVDVPGAHIEIGQPSL
                     QVR"
     CDS             complement(6527..8587)
                     /codon_start=1
                     /product="Phage protein"
                     /label=Phage protein
                     /db_xref="SEED:fig|6666666.356868.peg.9"
                     /translation="MTMYVASFEPKKSAIKSGAKAMATLVEAKTQKLAAMAATMLIEEL
                     FPGSSDNFFNPTITEDRVGSPRPGIGKFSTDFMEENELVDGVWTRKPDPAPQRPAELSL
                     QEKIAALVLLGKTDLDDHDYSLVLDFFADDESGDDDTHTIVRVLSQYPAVAAMYPARVT
                     ELVAEIEKKFSPPIDAAQASAFVNNWIYGTSDRHTQSAPPADAPAVERVWTNMDRLDIG
                     IASCLVTDADTFDGVSASDVARAKELAKSDDQMFQRWSMAIRLQDGALSIPGDVLLGLL
                     REAKKRPELLNDANARQRLADEYLAAWREDDGTQHAGAATATRQPDIQNLGCGRFSIDG
                     LIGPESGASNQGEKTEASQPEPAVSVAQQARQELDEIGYGIYAGNDEGGVPAPADDFQA
                     RAAAVESAIAEKPVVEQENLSIWKRVQRTDPRYTKPLTGAGFEGTSINSEYMFMRATEI
                     FGPAGSGWGHRILEEKMLPGAPLSEAIYDDNKKFIGTKLLRDADGSLITELNHSMKIAF
                     WYINDDGGHSEIEAYGATPYMYKTQKGIKTDSEVIKKSLTDAIKKALSLLGFSADVWLG
                     MHDNPEYVAENEVEFGIKRASEKAVDVTRLREELDEKLGRAAETIKAAVSENEAAKVYG
                     VLAREVEVHRKNAEAKGDSDHAKYLSGRLRRLSELKDTRIAELKAKEGEKA"
     CDS             complement(8603..8908)
                     /codon_start=1
                     /product="hypothetical protein"
                     /label=hypothetical protein
                     /db_xref="SEED:fig|6666666.356868.peg.10"
                     /translation="MKAPDINVKLYIHHNRFNPAPFVATCDMSQWNGFTLIEVREITIP
                     APQLSADDLKNKYVEQLRRQQSSIIESAHLQASEIEDQIKTLQCIDHLSLSGITTA"
     CDS             9591..9884
                     /codon_start=1
                     /product="hypothetical protein"
                     /label=hypothetical protein
                     /db_xref="SEED:fig|6666666.356868.peg.11"
                     /translation="MCGVTRPLLNYYHHRNESNLCRLRYPASLYRPNQARIYDRTSGVS
                     AVFPAVRTHYPNYCGHWFCLGANHLPIRAPVAATSWASCLFAVVGITLTKGK"
     CDS             complement(9954..10355)
                     /codon_start=1
                     /product="Phage repressor protein C2"
                     /label=Phage repressor protein C2
                     /db_xref="SEED:fig|6666666.356868.peg.12"
                     /translation="MKTETLNERIRARRTEMDMSQQRLADAVKVSHVTIFKWENGDSQP
                     KGQNLFSLSRALRCSPTWLLYGDESSTPAAPEELPTELDDRQRKLLDLFDSLPESEKER
                     HLADLEQKVDGFNALFEELLMARKKSNKK"
     CDS             10435..10632
                     /codon_start=1
                     /product="Putative regulator of cell division encoded by 
                     prophage CP-933O"
                     /label=Putative regulator of cell division encoded by
                     /db_xref="SEED:fig|6666666.356868.peg.13"
                     /translation="MFKNDAIKFFGSKTKLAIAAGVSQASVSRWGDVIPERRAARLDRV
                     TNGALRYDPDLYQRHNDTQG"
     CDS             10683..11129
                     /codon_start=1
                     /product="Phage or Prophage Related"
                     /label=Phage or Prophage Related
                     /db_xref="SEED:fig|6666666.356868.peg.14"
                     /translation="MDIRDLKNEVEDWAAEAGQERVAIEISRALAELGGHPGIKLHDIE
                     CGDVWRAINNNRQQIFRWLRSDTRAADRKIQALAPAIKRALPAERRARLESSAMYLVSI
                     AIREFFEAVIAILLGDCDMSQRLATANAAIAAVAPVLQQRLTTV"
     CDS             11145..11357
                     /codon_start=1
                     /product="hypothetical protein"
                     /label=hypothetical protein
                     /db_xref="SEED:fig|6666666.356868.peg.15"
                     /translation="MTTITYCNGFRLNGDPAHIADIVPIFEARREAARSAWEQYEQRKA
                     ELCSENLTPDQYQDACRAIAEALGV"
     CDS             11365..12186
                     /codon_start=1
                     /product="putative replication protein"
                     /label=putative replication protein
                     /db_xref="SEED:fig|6666666.356868.peg.16"
                     /translation="MQLMAKAMSCKVGNPLRKLVLIKLADNANDKGECWPSYQHVADQC
                     ECSKSAVKSHITALIDMGFLSKENRIGENSGKGNKSNVYYLTLDNPVVPESTAPVPSKS
                     IGMSPCDPPVVPESTAPVPSKSTRTYHSSEPVNEPVIEPKTHGARDGNYSEQFELCWKA
                     YPKREGSNPKNHAFKHFQARVKEGVSPDDLLAGTRRYAAFCAAKGQVGTPYVMQAQRFY
                     GTSREFENSWEVSTTPAPAPRQQKPADTTQDMLARQYQGGGVNWKFRGESR"
     CDS             12183..12788
                     /codon_start=1
                     /product="DNA replication protein DnaC"
                     /label=DNA replication protein DnaC
                     /db_xref="SEED:fig|6666666.356868.peg.17"
                     /translation="MTTTTDVSEILAADCGVGRRFIRSTLQNFTPVSEQADGNLAVCRQ
                     FVSEWGQIYENGSSLVMNGRPGTGKTHLAVAIMRALIEQHGIDTYMTTAQRIIRAMRDS
                     WRQGSNRTEYEVLSFYCEKDLLVIDEVGMQHGTDSERLLVSEVINTRYERMLPNILISN
                     YTRDEMDGFLGYRAMDRVMESSAVLVFDWESYRTGQHG"
     CDS             12781..14199
                     /codon_start=1
                     /product="DNA helicase (EC 3.6.1.-), phage-associated"
                     /label=DNA helicase
                     /db_xref="SEED:fig|6666666.356868.peg.18"
                     /translation="MADMADFLPPHDLNAEQAVLGGLMLNDDEERRAAVMAMLKPESFY
                     SRAHERIYRGLQALAKTDRPTDAVTLSAELTASGDIELVGGFGYLVEICRVPAAANTAA
                     YARIVRDNAIARYTQRQLIACTEIIMASGGKPIDEKLASIQQIMGQMFEHAFNGKRGGL
                     RPFADVLAEWIDEVDRRFTDPNAGGLTLGFSGLDEIMAPKYVSRGALVVIGARPKMGKT
                     AFYNRVVGHFALNHQLPTLAFSLEMSAKKIVERMVSQEARVKSEIFYAGTNDEMEMARA
                     MAKAEELAETNLMIDDTPAVSLAHITNECRRVKRRRGAIGLIAVDYLTLMKGEQAERRD
                     ISYGEITKGLKSLAKELDCVVLLLTQLNRALEQRVDKRPLPSDSRDTGQIEQDCDVWVG
                     LYRDAVYNENADPQLTELILRMNREGPSGTAYTLLRDSYFVDTTPEDIAQKKSQSAAPQ
                     HERRYRKKEPIQPF"
     CDS             14247..14726
                     /codon_start=1
                     /product="hypothetical protein"
                     /label=hypothetical protein
                     /db_xref="SEED:fig|6666666.356868.peg.19"
                     /translation="MTTQTDVVFAKHAGMIDDGCDHTVVFLWEMNQRARAVSRSVYIPR
                     PQPIPVVKPRELAARKPARRQAESTQYRYANTLPLESLIAVMTGRWLSSQSIMSIIKNE
                     YPQHTISPRALAVRISSMMKSPSVDIESRDISVTEYRLNSVDPAYLERSKRGSGK"
     CDS             14798..14959
                     /codon_start=1
                     /product="hypothetical protein"
                     /label=hypothetical protein
                     /db_xref="SEED:fig|6666666.356868.peg.20"
                     /translation="MEWLDLRANQLIHALIDGKTDRHLVEAEISRTAEQHQEHFKRRLN
                     YWREYLKK"
     CDS             14971..16170
                     /codon_start=1
                     /product="Phage EaA protein"
                     /label=Phage EaA protein
                     /db_xref="SEED:fig|6666666.356868.peg.21"
                     /translation="MTELTKEALTDAIRSAAVKAASTDERRVLNYAAGEIERQGNEIER
                     LKSDMRELTEAMNRARRTAKELGEENHSLRNPASTEKITAQLEGLKYTRAEPNGWTCKT
                     LAHGRVTDDVAESWNGAIDATILTIADWDALRHAQQEPIITDSELASGPRGQIFIRKPT
                     PSPEVPEETGSSLQLRNLIRQRHAAWSQATFGDVGPVGPLRHLSKEALEAAAEPEDLSE
                     WADMQFLLWDAQRRAGICDGEITAAMEEKLKVNMARQWPEPKDGEPRLHIKEAGADHSE
                     HPIELVEIPVERDESGYWSHPAWSALFGEREGMPRDELNALLASKNLECTYIELECNYS
                     TESEGVAYRYFENGDTNISDWNPAPPEGDGWFIVSIHETDDGPVCWWVRPIPQIEGDKA
                     "
     CDS             16167..18338
                     /codon_start=1
                     /product="C-5 cytosine-specific DNA methylase family 
                     protein"
                     /label=C-5 cytosine-specific DNA methylase family protein
                     /db_xref="SEED:fig|6666666.356868.peg.22"
                     /translation="MSIWPTEVLQCASSVIPAHPMNNERREALLSHMNAMFLRRENPAD
                     IQRTAHMLARRQQIEGARPDADNGLVVVGFAGGGGSCEGIKQALGFEPHIAMNHNPVAM
                     AMHAMNHPRTLHYPEDIFSVDPIVSTGGLPVLLGWFSPDCRHFSKAKGGTPVKKEIRGL
                     AWVVLRWALAVRPRVLMMENVEEFRGWGPLVADRKGHLYPDPARAGETFQGFIGMLSTG
                     VPRDHPAIDEACEFLKIPRDGDEVKRLIAGLGYNVAHKELRASDHDTPTIRKRLFVVAR
                     RDGKPVQWPEPTHGDPVTASVINGLLKPWRTAAECIDWSIPTRSIFGRKKDLADNTLRR
                     IVRGLQRFVIDNPTPYIVRIGQTGFGGNGMQYSCDQPLTTITSKAEHCLIEPFVVKANH
                     TSTKTKYDCFRGRSMRRPLQTITKTHGFSVGAPVVVRQFGNSNAQRPDHPVGTIMPGGG
                     GKTQVASAVLVGAGGPAYSGKPRDINSPAITLTTESHTALVSANLIKHYGGNYSGAGVE
                     VDEPLHTITTTDHHALMTSHLVKLRGTCRDGQAIDEPMPTVTAGGNHVGEVRAFLTKYY
                     GNERDGVAVDDPMHTIPTRDRFGLTSVQCEPEPLTDDQRYGAWWCARLFDKFSDTNDDS
                     DLFPAPRQQYLSVGECVIVDICMRMLEPRELYTANGFPPDYIIDRDADGNVISKADQVA
                     HCGNVVCPPVARALVYANLPEYCIGEMAA"
     CDS             18919..19512
                     /codon_start=1
                     /product="Phage protein"
                     /label=Phage protein
                     /db_xref="SEED:fig|6666666.356868.peg.23"
                     /translation="MAQLSLVKSPGGILVPSTPDTRDYLNRLSVGAVICCEFKKARNPA
                     FHRKYFSLLGLGFDYWEPVGGAISQSERDFVRGFVRYLASYAGAEDAISAVADEYIETT
                     GRQRAANISATKSFDAFRRWVTVEAGHYDAYIMPDGSIQKEARSVSFAKMDDLEFNDLY
                     RATLDVLWNFILRRSFPTLQSAENAAAQLLEYAA"
     CDS             19509..19793
                     /codon_start=1
                     /product="hypothetical protein"
                     /label=hypothetical protein
                     /db_xref="SEED:fig|6666666.356868.peg.24"
                     /translation="MKTIYRSKKWLAAVGSIQQCVLCGAWGTQVAHRNEGKGMGIKADD
                     CATAAICTGCHTEIDNGKNLTREERRQQMDRAIVLTIIQIARQGLVVPK"
     CDS             19790..20146
                     /codon_start=1
                     /product="hypothetical protein"
                     /label=hypothetical protein
                     /db_xref="SEED:fig|6666666.356868.peg.25"
                     /translation="MKTYNITPIGKPRMTQRDKWQKRPPVLRYRAFCDEVRLNKITLPD
                     GGWHVTFVIPMPASWSKKKRAEFNGKPHQQKPDKDNLEKALLDAIFDDDSRIWDGRVSK
                     IWGEIGQIIICEDA"
     CDS             20143..20283
                     /codon_start=1
                     /product="hypothetical protein"
                     /label=hypothetical protein
                     /db_xref="SEED:fig|6666666.356868.peg.26"
                     /translation="MNHTNHITDILRLRWCRLRIYRYAGSVVIDYRILRNYQKTLVRAG
                     A"
     CDS             20280..20975
                     /codon_start=1
                     /product="Phage anti-termination"
                     /label=Phage anti-termination
                     /db_xref="SEED:fig|6666666.356868.peg.27"
                     /translation="MNNQFLQYVREEIMLATADFSGRTKGQLVALAEQLQYTNDRYPRK
                     RQFVIDPETEKKVMLKNPPIPGKQSRAKGSSIPLVIPVEYATASWRRAIGVIDEHQGAW
                     LRWNYAGDTDFQLQAIIVRFGWVEFSEGIKGRRIAKKTRERLRALIWLAAQDVKFQLAG
                     RNDDVYQHADLAALAGVSKSTWSETYQPHWLSMTRIFTEIDRAALISVSKTRSQQKSTN
                     CKSCIAKPN"
     CDS             21030..21203
                     /codon_start=1
                     /product="hypothetical protein"
                     /label=hypothetical protein
                     /db_xref="SEED:fig|6666666.356868.peg.28"
                     /translation="MSREEARLARVFAFLGDLNYVTAKRIDLGRCEKWQEFTASAFAGA
                     FLFLQHRSPRGR"
     CDS             21209..21532
                     /codon_start=1
                     /product="Phage holin #Lambda-like group I holin"
                     /label=Phage holin #Lambda-like group I holin
                     /db_xref="SEED:fig|6666666.356868.peg.29"
                     /translation="MRMPYKQDLLAALLAAKEQGAGAVLAFVMAYLRGRYNGGKFLRTL
                     IDALMCAMIAWFIRDLLDFVGLSTNLAYIASVFIGYIGTDSIGALIKKIINKRAGVEDA
                     NQQ"
     CDS             21516..21956
                     /codon_start=1
                     /product="Phage lysin (EC 3.2.1.17) # Phage lysozyme or 
                     muramidase (EC 3.2.1.17)"
                     /EC_number="3.2.1.17"
                     /label=Phage lysin
                     /db_xref="SEED:fig|6666666.356868.peg.30"
                     /translation="MQISNNGIALIKKSEGCRLSAYQDSVGVWTIAYGWTQPVDGKPVR
                     AGMQIDQATAERLLRCGVVQYEQAVNQLAKVRLTQNQFDALVSFAYNLGIRSLSTSTLL
                     KKLNAGDTAGAADELLKWNKAGSQILPGLVARRAAEREMFLS"
     CDS             21953..22531
                     /codon_start=1
                     /product="hypothetical protein"
                     /label=hypothetical protein
                     /db_xref="SEED:fig|6666666.356868.peg.31"
                     /translation="MNWSKSVIADVLLLMLAGVAAMAAYYHGQYRLQSERADKLQSEVN
                     AQQSVISQQSLQFQKFNQIAGHASRQAMAITAKSEERQIVYRTIIKTDAPGRQCVPDDV
                     AGRLLDYAHSLRTAAVPAAPGDANTAGVTTAAAGCRLTYAQAVYWLDPLLAAIERANGQ
                     LAAIRDVEHARKGISDGSKAADGAAVQAR"
     CDS             complement(22608..22754)
                     /codon_start=1
                     /product="hypothetical protein"
                     /label=hypothetical protein
                     /db_xref="SEED:fig|6666666.356868.peg.32"
                     /translation="MNDCGARGLFVAESLITEFSATSLNAPPGIYEIPDRENLYKTLSM
                     ALC"
     CDS             22708..23346
                     /codon_start=1
                     /product="hypothetical protein"
                     /label=hypothetical protein
                     /db_xref="SEED:fig|6666666.356868.peg.33"
                     /translation="MSDSATKRPRAPQSFITPADPYPYTRLTPANDIHDWISDNIISDA
                     GYLHNPDHVHLAEADIAFLWASNAFEKKGRAVLGQCEEVMMRAGGWQKARMEQQMHEWF
                     GRIPKFIITLAADYCSQCSDLEFCALVEHELYHIAQATDDFGAPKFNKETGQPVLTLRG
                     HDVEEFTGVVRRYGASKEVQELVDAANAPAEVAHIDIARSCGTCMLKLA"
     CDS             23379..23858
                     /codon_start=1
                     /product="Phage protein"
                     /label=Phage protein
                     /db_xref="SEED:fig|6666666.356868.peg.34"
                     /translation="MATLKGGVKAFIVQSLACFDTPSQVVELVKKEFGLSITRQQVESH
                     DPTKANGRGLAQKWVDMFNVTRERFQNEISDIPIANKAYRLRVLDRMATRAEGMKNLAL
                     TAEIIEQAAKECGDAYTNKHKYEHSGPNGGAIQTITMSKEEYKSARQEMMEDDDC"
     CDS             23845..25317
                     /codon_start=1
                     /product="Gene Transfer Agent terminase protein ## ORFG02"
                     /label=Gene Transfer Agent terminase protein ## ORFG02
                     /db_xref="SEED:fig|6666666.356868.peg.35"
                     /translation="MTTAEQRAFARKVECEEDGLYYARYFFKQRTGGKMIVAPHHKVIQ
                     QTLDRVIDGEIQRLIINVPPGYTKTELATINMMGRGLALNCRARFMHLSYSHNLALLNS
                     STARGMIKSQAYQSMWPMALRDDADSKAMWWTEHGGGVYASSAAGQVTGFRAGHMEPGW
                     QGALIIDDPVKPDDAYSEIVRDGVNNRFNETIKSRLAIETTPMIVIMQRIHYHDLSGYL
                     LRGGSGEKWHHLNLPVIIDSSRSYEETYPENTHAIPIDHGLADGWLWPFKHNESHRVSL
                     FSHRRTAEAQYMQNPKRFNAEGALWNEEMISAAHAMRITLELSRTVVAIDPQATNSEES
                     DESGIAVASVYGSGDERQYSLDADYSGKYSPNGWATKAIEAYEQHEADAIVIETNQGGD
                     MAEDTLRNAGFGGRIIRVHASKGKYARAEPISALYAQGRVAHRGSLYEVENQFMEYVPS
                     TAKKSPDRLDAAVYALTELSEPQSIGMLVRSR"
     CDS             25329..26780
                     /codon_start=1
                     /product="Phage portal protein"
                     /label=Phage portal protein
                     /db_xref="SEED:fig|6666666.356868.peg.36"
                     /translation="MTESEMKQQRASNSSVERERNKNLSMLFNGTSNTKRQRLYQEFGY
                     PLHLTFDDFYRAYRRNAVAGAAVTRMLDGCWEDYPDVYEGDQTKDASKQTAWDKRVNKL
                     LKRCWEQIKGADRRNLVGRYSAILLQIKDSQPWSEKVDKEVVGRLQEKALVKLIPAWEA
                     QIDPVTWDDNPDSETFGEVTMYSFTELPVDGNFDARPGRIINVHHDRVIILAEGSDDGV
                     MTSGKSLLEAGFNKLLDIEKVSGGASEGFLKNASRQLNYSFSEKTNFSALAKALGVAEG
                     QLAEALDQQVRRLNDSTDSASFMQAGTAEVLSVAAADPEPTWRTALSEFCATVPIPVKE
                     LVGMQTGERASTEDAKGWGRTRMSRRKGFLTDVITDVVSRFWTLGIIPLAQNEEITVGW
                     SDLLAPSQAEKIANMDKLADVAVKSTNAFGRSAIEENEIRAAGELQPLPELDDEVPPDG
                     NKPKPDPLADPQSEAEKSGDTTVES"
     CDS             26788..27708
                     /codon_start=1
                     /product="Phage head decoration protein"
                     /label=Phage head decoration protein
                     /db_xref="SEED:fig|6666666.356868.peg.37"
                     /translation="MSRKSVSKMERDIEDRYYAIKLALKSLLDQRLIGREREVNSHNWH
                     FLCHDNGADMRLYHVNAGKFIYDMSAQELADLLEAVQAILDDHLLEGGEQNLWAMDYVV
                     AEAQRGTLEAFNNLSQQSQVYASQTTLQQLLSSPGHLNQVAAARLTAFSDWKVISDTAR
                     GDLTNIITDAVARGVNPRETASVISKRLDVSMSKAKTIAQTEQVGALREAQWNETDWAS
                     ERLGLNTGLLHLSALKPTTRTTHAFWHGKVRTVQEVRDWYAVDGNKYHCYCGQIPVLLN
                     DDGSIFNEGLADKLTAERKQWAKAA"
     CDS             27726..29114
                     /codon_start=1
                     /product="Phage coat protein"
                     /label=Phage coat protein
                     /db_xref="SEED:fig|6666666.356868.peg.38"
                     /translation="MKLSSIHVKSLAINASNISTTTINGQEHYVIRGAVPIVDDIVMNG
                     GLYPAEEINNSYQTMERKLMPIGHPMVNGKYVSANDPQAVNDYYAGAWAQNVSKANDKV
                     VMDVYVNKAVADTKPDGKRLIQRLDDMISGNNADPIHVSTGLLLNKEQKAGESKQKKYS
                     WVAHNMQFDHIAILLDEPGAGTPDEGVGMFVNADGQQADVETTSLIDAANSMKDGWWNK
                     TKFYLSNASNYSFDEICAALRNKMSEGKPETYYFWPEAVWPDRFIYEENGKYLQQKYLI
                     DDDGKAELVGDPVEVVRKPTEYEVKTNGETNPMKEKMIAALNAAGVKTEGLTDDQVWDA
                     YNQQMQKKNGGGDPDQAQINSDVITAAVNAALTPLNEKLGKLETQLQANAESDLKTKRD
                     AVKAKFSFMTEAAINSLSGEALNDMYSQCQTSTPLNPSFQLVNSENDQWKDYDLNAGME
                     EGTK"
     CDS             29114..29548
                     /codon_start=1
                     /product="hypothetical protein"
                     /label=hypothetical protein
                     /db_xref="SEED:fig|6666666.356868.peg.39"
                     /translation="MANVIYRGPVEREPETINLPVASALNPGVAVKVASGKLAAAADTT
                     GRWLILGNRRFIGQAITTAYAANETGVAYRVEGEQEYNVRLAAAAYTVGQELTIGAGGV
                     FKAAATGNQVVATFDEKAGRTLAAEGFADVVILSTQYAKA"
     CDS             29560..30591
                     /codon_start=1
                     /product="Phage coat protein"
                     /label=Phage coat protein
                     /db_xref="SEED:fig|6666666.356868.peg.40"
                     /translation="MLKFTKQQQALILNARRRWDMMQRNMAAQHGFAVNDASGQFIAFD
                     ELVGNASVLPKDVWGEWDRSAITVQRDVLAVFNDLAASVSRPMALGKIVHYFMTLSDSG
                     DVNISLDGRSKAKTDQPVMDYEGTPLPIIDSELSFGWRQMLAAQTEGYSLDSDAISNHQ
                     RKVAEKLEDMVLNGDPNISVGGATIYGLRTAPNRGTGTHGLTLNGATGAQWVAAISNLI
                     NLLHAENFYAPVTIYLNYKDWFYASVNDYAANYPKTILARIMEIPGVASLVPASKVPTD
                     ELLGVVKRPDVVQILNGMPVTMRPKARLSPEDDYVFSVLAAAAPQFKRDANGQAGYVQL
                     TKA"
     CDS             30631..30924
                     /codon_start=1
                     /product="hypothetical protein"
                     /label=hypothetical protein
                     /db_xref="SEED:fig|6666666.356868.peg.41"
                     /translation="MAGKEQKWLLTHDSHELKKGEVYKGETLPLWLVGKAIPVSDQVLE
                     VATPDSEAVAKLQTELDEANGKVTTLTDANTKLQTELDEAQKQLTELQKKAK"
     CDS             30927..31307
                     /codon_start=1
                     /product="hypothetical protein"
                     /label=hypothetical protein
                     /db_xref="SEED:fig|6666666.356868.peg.42"
                     /translation="MAAQITADEASALLAELGYSIPSVVLGLLLDQVNAIDECLDAAGQ
                     DDNTQKLIKLYAAALLAASSGARRIKSRGAPSGSSQSFDYGEDGITWLRDSLIRLDTSG
                     CTGALPISAGNSVGLFMVVGGC"
     CDS             31468..31581
                     /codon_start=1
                     /product="hypothetical protein"
                     /label=hypothetical protein
                     /db_xref="SEED:fig|6666666.356868.peg.43"
                     /translation="MGVVGFVNAMAKPGTGYAAAIYGDDNQLTGFTVVGAD"
     CDS             31581..31751
                     /codon_start=1
                     /product="Phage protein"
                     /label=Phage protein
                     /db_xref="SEED:fig|6666666.356868.peg.44"
                     /translation="MTWVSVSVRLPRSFTRVWVMTDTGRQTTGYVKSDGAWFINCPRIR
                     AAGAIVLQWRE"
     CDS             31754..32104
                     /codon_start=1
                     /product="Phage protein"
                     /label=Phage protein
                     /db_xref="SEED:fig|6666666.356868.peg.45"
                     /translation="MSSAANWSYTAKATVWRKLAGNDEYGDPMGYAAPEVIMCDYQGGL
                     SKKLASLGAEIVVKNTVWTEYALADAGDYLLIGESTEADPVSAGADEVRQVIRYADTFE
                     RLADDFAILTGA"
     CDS             32107..32475
                     /codon_start=1
                     /product="Phage protein"
                     /label=Phage protein
                     /db_xref="SEED:fig|6666666.356868.peg.46"
                     /translation="MGAKVRGIAQSKRGLERIINDIQGRKAVRAIQSAMLIGAAQAALY
                     TPIDTSTLLNSQYRELNVRGTRLTGRVGYSANYAVYVHDPDVPQAFRRTTAEKEFLTKG
                     FADTWEQITEAMRKELAL"
     CDS             32472..32855
                     /codon_start=1
                     /product="Phage protein"
                     /label=Phage protein
                     /db_xref="SEED:fig|6666666.356868.peg.47"
                     /translation="MTPLIYERVRNMFGDAGLADGFTVQLLMYDDPGDLSKAVMVFRPN
                     GGTAIRNDLGAEHYVLVDIIGAKDKRRDAASAVQRIIDYVQANPMGDECVGFIQNMGGI
                     PPPVLTEDGRIVFRLQFACNYGE"
     CDS             32919..33662
                     /codon_start=1
                     /product="Putative phage protein"
                     /label=Putative phage protein
                     /db_xref="SEED:fig|6666666.356868.peg.48"
                     /translation="MSDCTNSNERLFGGAVVLEVADGCPDAKPAEADWKALAAGTSKGF
                     DFNPNTVTSDADDGAGFVETIITNSDFTISFEGEVRKKDRLDQYGIGKYIKYFSTELAA
                     KRQPGIWVRMDYGPVEFVGYMNITALSSDGGTNDIVTFSTEFKVGDASTIEVNETDTVA
                     VTGVTISPTTSTGAAGGTSTFTVTVAPTGATNKTFTVASTDPTKATATASGTTVTVSRV
                     AAGSAQIVISTADGNFVATHTVTVS"
     CDS             33724..34404
                     /codon_start=1
                     /product="Phage protein"
                     /label=Phage protein
                     /db_xref="SEED:fig|6666666.356868.peg.49"
                     /translation="MTPLKAIGECVISTRQRDYLLRPSFAAMTRIGEPAEVVRAFYDLH
                     NDEARQLIERAIDAYGTAPAWLITHVSRPIFSRQAVLAAITVLAACCDTDCSALTGELV
                     PRKTGKDGVIWRPGSMPAPDLVLVAQSLITHGIIGKAKVRRLQRHESAERTTEFHAVEY
                     INAARSHFGMSRQEAENLTMTEFIMLLAAKYPDQKGFTREEYDAVADDYLRRKAARLTK
                     ENTH"
     CDS             34608..35141
                     /codon_start=1
                     /product="Phage protein"
                     /label=Phage protein
                     /db_xref="SEED:fig|6666666.356868.peg.50"
                     /translation="MNYPTVSVNGVSVRVDDAGRYSLNDLHAAAVANGEATESQRPSVF
                     LRSAQVKRFIKALQAKALKSASEQNQPLRVTKGGDETGAWGVEILAIRYAAWIKPEFEI
                     EVYEVFRMAIRLGISAMSRLNKIDHIISTETKEISQCARKMAGWGAGGRKRLLQAARER
                     AADEVQMYLPGIEA"
     CDS             complement(35171..35926)
                     /codon_start=1
                     /product="Phage antirepressor protein"
                     /label=Phage antirepressor protein
                     /db_xref="SEED:fig|6666666.356868.peg.51"
                     /translation="MTTFTVETLPAISHNSIPVITTELLAQLYGTDSVRIRNNFQRNRD
                     RFVEGKHFFKLTGSELSEIKHRVSLRDSVKIPTNIRALTLWTERGAARHAKMLETDQAW
                     DVFEKLEDCYFNQCESRPEKTTTLERTPLRDAVNLLVGKTGMIYSDAYSLIHQRFNVER
                     IEDLTQTQMLQAIEYIHCLIIDNRPVSSPLFSGRVLLTFRDGRMDRAEIAREDEHLISV
                     KTMTELLQKRGFVIMTKDELTTRIAGILG"
     CDS             complement(36200..36454)
                     /codon_start=1
                     /product="hypothetical protein"
                     /label=hypothetical protein
                     /db_xref="SEED:fig|6666666.356868.peg.52"
                     /translation="MALSFQRIVELSQGCKPKSGEAQELAELIIDIATKAPRPVSYQWR
                     WRDHVIGCSHEWQFSAIPVNHPDVECRMVYDLPGAPVID"
     CDS             36609..37307
                     /codon_start=1
                     /product="hypothetical protein"
                     /label=hypothetical protein
                     /db_xref="SEED:fig|6666666.356868.peg.53"
                     /translation="MRKALITAIFFLSGSAMASDYLTCSYAKADISKGVGAPMMNMGSS
                     RVEVSGSSFKAYRPDGTYIMTPQLTTKKDGLLISDDGNKVFAASVDKSNFAVSDRISKT
                     TEQWASCRVVSDAIRDLENKENEIKSIEKMTVSQAKAYFMTEKHAFTTNCLVWDDVTMI
                     TGKNPAMIIAGGVQMGKGPKWNGEEYSFTFNNGSMIARFKPFEPRHKFLIQAGDKFYGC
                     GPSFIERGYD"
     CDS             37368..40949
                     /codon_start=1
                     /product="Phage tail length tape-measure protein"
                     /label=Phage tail length tape-measure protein
                     /db_xref="SEED:fig|6666666.356868.peg.54"
                     /translation="MPTKAGEIYYDIELETAQLLSSQREANSALDSLGRGFTRTTRSIE
                     ATETAMSSLSRVAVALTAALSVQQVSEYANAWTTVSNKLANSVRPHEQLVDVTQRVFSI
                     TQSTRSSLDATASLYARLERATRQYGTSAGDLARLTAIINQGFIVSGATTQEAENAIIQ
                     LSQGLASGTLRGEEFNSVNEQGNRLMVALADSLGVGIGQLRNMAAQGKLTTDVVVKGLL
                     SQGSKIGAEFAKTIATTSQSLELAKNNITKFFGESTSVQTGLSIFNNAVISASNHMEIM
                     GSALAAVAVVLGGRFAGALTMAAAQQVKSIAASIASAKAAAQSAAAAELDAAAQLRLAQ
                     ANKDTALSDLNLAQARLNVIRETNAAGVAEVALADSKAASIRTNLAQIEAEKALETQRL
                     KAQISEQGRIATATRMAELQRASTALTAQLATTEAAASQARATAIAQAEAQVSSARLAT
                     ADASGVAAAANGRYAASQEMATAATKAARTSIGLLNGALALIGGPSGFAMAAAATVFFL
                     YQRMQQAKQESIDFADKLDGVIAKMREMSFAQLDKEVAKGEKSLIAQADAISDLKTQLI
                     ELRAEESKYTGLISQYKSEGEWGKNLADIRRKIRIATGELDEAETKRSQTASKVGIIQA
                     QMNGQLKQGADLLQRNSQETGVAAGMMNNLGQMINFAAKSKERFNATSLKVTANPDAQK
                     EIDDLQEQVKLLGIVDKRQRAITEAQDKAKTKGGNTNQIREAGEYAAKLHDLKEAESDR
                     EKAQREAESEANKAANQQQSIALKLENLRQQTEMTAESTRELTREQAVLRAQQSLGGGA
                     TDEQIRLAGELAGKKWDVANAIRAEAAAQKMLPETAENKSYQDDLKDLKIALTSKKISQ
                     EQFNTTAERLEQEHQAKLAKIRSQQAVTPTQEALGQVDPVQQLANQHAQQLALIQQFEQ
                     QGVLAHENALALRNAADTQYEQQRIAAAWQIWEQQNTTNKLLGSAIDSMSSSASSALTG
                     LINGTQSLQQALANIGSTILNSVISALIEMGMQQVKNAIMGQAAATAALAATTAQATAA
                     ASAWAPAAISASIATMGAASTVGTTAYTGALAASKGLAIAGARYNGGPVSADSLYQVGE
                     HGKPEIFKASNGSQYMIPGDNGSVISNRDLAGSSGGGAAVTQTNHFTINTTGGIDDTTM
                     AKLAAMMKQVSLSTIKSEQRPNGLLRK"
     CDS             40951..41301
                     /codon_start=1
                     /product="Phage minor tail protein #tail protein M"
                     /label=Phage minor tail protein #tail protein M
                     /db_xref="SEED:fig|6666666.356868.peg.55"
                     /translation="MAEVFVWSPQASIQLTREPSVSVVKFGDGYEQRQVKGINSVMDKY
                     SLTFRGVSGMCGRENVAVAAEAFLKARGAVESFYWTPPHTGAPALFVCRSWTLTKNHGL
                     YELTADFEQVPR"
     CDS             41335..42039
                     /codon_start=1
                     /product="Phage minor tail protein #Phage minor tail 
                     protein L"
                     /label=Phage minor tail protein #Phage minor tail prot
                     /db_xref="SEED:fig|6666666.356868.peg.56"
                     /translation="MRDIPSELIIQSVDAGVGAFIDLFDVNLQPLGGDIIRFHAGTNDY
                     YGDVIWKGLAYSAYPIAVEGFETKNEGAYARPTMKVANITGLITGINADFDDALGAVVT
                     RRQVPVSALDAVNFPNGNPDADPTQEAVSRYVIEEMAEETFETVTYNLATPIDCDNAII
                     PARTILADVCQWLYRGDGCGYTGGPVADERDNPTGDASKDRCSHRKSGCRLRFPKPAVL
                     PIGTFPGSSKVS"
     CDS             42039..42767
                     /codon_start=1
                     /product="Phage tail assembly protein #Phage tail assembly 
                     protein K"
                     /label=Phage tail assembly protein #Phage tail assembl
                     /db_xref="SEED:fig|6666666.356868.peg.57"
                     /translation="MLEQECIDYAAGEPGREVCGLVVNDDQLVKCRNIHSNPAERFRIS
                     DDDWLKAEAAGEITAVFHSHPGNSLALSGADRQMQITTALPWWLVSCGVLRKFCPVPHL
                     LGRQFEHGVTDCYTLFRDAYHLCGIDLPDFERVNGWWVRGENLYLKNLTANGFRTIARQ
                     DIQPGDVIIRRPFPEADPCHAMIYLGGGQVLHHDCAGRLSRREPYRPAYVQQTHSIWRH
                     EQCSSLNLQGIYADISAKSY"
     CDS             42797..43243
                     /codon_start=1
                     /product="Phage tail assembly protein I"
                     /label=Phage tail assembly protein I
                     /db_xref="SEED:fig|6666666.356868.peg.58"
                     /translation="MLLAQCPAFKRDFYRTRVRMRIAGDDVSPDTLEFHMHRQPRDGST
                     VLFVPIVDGAIAAAPAWVIWTMVAVSVASVAYSIYSARNMKTKTSAEAAQTNSITNNSF
                     TSAENRVGQGRPVPILMGEMVVGSNVISLGIDTTNNKDWNISIS"
     CDS             43253..46417
                     /codon_start=1
                     /product="Phage tail fiber protein #Phage host specificity 
                     protein J"
                     /label=Phage tail fiber protein #Phage host specificit
                     /db_xref="SEED:fig|6666666.356868.peg.59"
                     /translation="MSSGGGGASTPTLLNDNLTSKQFYRVLDLISEGPIYGPVDQTYLS
                     SFLVNKTPVTSASGATNINGVSVAWRPGSMAQPPIMGFDAIEATTIVNNAVTFDTPLVR
                     TVTDDDVARVRVNLGVSGLVQQDTAGNQSNTSVTMVIETRAGSGGAYQIAKTVTISGKI
                     SGEYLEAHIIDAPDTKPFDIRIRRITPDSASDLLTNGTVWNSYTEITDDSLNYPYSAIA
                     GAVIDRSQYTDTPSRTYHLRGIIVDVPDNYDPTSRTYSGIWTGGFKSAWTDNPAWLFRA
                     LVKHQRYGLARRAGDIDVDDGALYVLSQFCDQSVNDGYGGTEPRLRLNAYITEPANARE
                     ILDKIASMFRGIAVWDGMRLSVMIDNPQDPVASITNANVVDGLFTGSSVPRSERYNAVV
                     VSWTNPANGWEQDKEYVSDDTLIGRYGYNETTLEAFGCTSRGQAYRAGRWLLETAKRES
                     RKVTFRMARDAIAFMPGDIVEVMDNNYAGTRLGGRILSHGGQAVTVDADISALVSSGDT
                     ISIMGSTGKLTRHEIQSVSGRVVTLKAAPAYVRDGTVFVISTGELAARLFRITSVKEDE
                     NNSTYTITAQHHDPNKQAVVDEGAVFDVPTDTLNGYRVPNVENLRIVNVASETVQVRAA
                     WETATTTRKLVFELYVYNESGAVVAQHETEQFQYEFYGLNAGNYTLGVRGRNDNGMKGA
                     ETQVSMVIGAPLAPSSVVWTPGIFSAGLVPVMSVSATTDTTFEFWYSSETRITDISSVT
                     TLAQYLGRATQWALHGLRAETTYYMYVRTKNAFGVSGFVEASGQASADIPGMLEYIDEA
                     IRDTGAFDNLQNGIDGNIEATLQNALATNAAVERQYAQYGEVRADVITIRTTVADLNGS
                     LAELTDIVQAQYGELTAAVNQKLTAEVTSSGAASAFYTLNLGVIRDGTKYNTGFGMGIE
                     PDGNGGYKSTVVFSADQFGVYSGSTPGNYQRAFFIYNGQVFINSAFIQDGSITNAKIAN
                     AAITNAKISGAIYSDNWNGVVGWNLDKAGGFQMGAIGTGRVKLDGTGLAIYTTAGAMVA
                     KLGWLS"
     CDS             46417..47418
                     /codon_start=1
                     /product="Phage protein"
                     /label=Phage protein
                     /db_xref="SEED:fig|6666666.356868.peg.60"
                     /translation="MVGLYVQPVDGGKLVDISNNVKCPSYLGYAAPQMSSNGDSITSHG
                     IFNGGQLFVIPRRTCLIYTIEGAVNPHVVACSGVSISGGDVYCSYSMFNQFWDKNRVAM
                     EYDVFQVINSQPQGFGLFLQNAANFFAISNQNVIGQCIKRISVTFAGSYALGVGSDAVV
                     FAHWNHPDASIYLDRGSMTIYAYNNNGEAVYTVTMDIVVFSNQPPTPHDGGLTLWREDG
                     VCVFSSRLPPLVWRGGYVDINSYPGAFVASNVPAEKPMVPLCSMGVHSSGPVLNGNYGM
                     MFYAGFKMVNNQVAAWRSRQYRSWYEGALSLTEPYYQITPMSLPVIDAADYL"
     CDS             47432..48643
                     /codon_start=1
                     /product="Phage tail fibers"
                     /label=Phage tail fibers
                     /db_xref="SEED:fig|6666666.356868.peg.61"
                     /translation="MSVGTITLTNGSVTATGAGTTFTSDLVAGDFVVAVVGGVTYTLPA
                     KTVDSATQVTLIRAYDGPTAAGAAWSAVPRDAMNAITAQLAADTAKAIRGLNYDKNNWQ
                     QVFSGTGTITITLPDGSTYSGLAWNSFTSALNTKAARGSNSDITSLSGLTTALSLVQGG
                     TGSTTASGARSNLGLGTAAIRNVGNTSGTVAAGDDGRFGSLEGKTGGTVSSEVVVNGLL
                     HATGFRPTNLSSESSGNARSIGINWTDAVGSIASTLEYYLVAGQYHSLRMLIDQASFSF
                     RGNGNAVAPGGAWIDGSDRRLKDKFEEIKDATSKTMMLTGYTYDMNGQRRAGIVAQDLQ
                     TVLPEAVELMGPGLDKDGNNVDDLLGVNYSSVTALLVNAFKEQQQMIEALTARVVSLES
                     AKSS"
     CDS             complement(48686..48907)
                     /codon_start=1
                     /product="hypothetical protein"
                     /label=hypothetical protein
                     /db_xref="SEED:fig|6666666.356868.peg.62"
                     /translation="MKIIDYHGTTVCVLDEDEMLDGCPMLSYAVFADFGGWLDVKIWPG
                     IAIPLHTDPLPTLEDVLDEIAYQENLIE"
     CDS             complement(49076..49231)
                     /codon_start=1
                     /product="hypothetical protein"
                     /label=hypothetical protein
                     /db_xref="SEED:fig|6666666.356868.peg.63"
                     /translation="MTVQPETSCNRVLGYVIRNFETDRHTAIRKKNDTQAGEKPMTEGS
                     GGERGI"
     CDS             49528..49875
                     /codon_start=1
                     /product="Phage protein"
                     /label=Phage protein
                     /db_xref="SEED:fig|6666666.356868.peg.64"
                     /translation="MTEEDIYPLLGKLANGHVYAYAVSCCDYHAPHRKYPFIIFSLSQE
                     NHYNASQQQTDQQITVGVDCYADTVAEARALREQVSAALAVLKPNQTAEYNDFDVEYEQ
                     FRMTLEMELSR"
     CDS             49966..52164
                     /codon_start=1
                     /product="hypothetical protein"
                     /label=hypothetical protein
                     /db_xref="SEED:fig|6666666.356868.peg.65"
                     /translation="MWYKSGSLSLFSGSKVVLGNNTAWADKNNSVVAGGMLLIFADCSI
                     KIYEIASVVSDTELVLASEYIGCTENGVNYAIPVLGSSDTFDHAAYVAQVAAMLAGYQS
                     QLAQWKQVLTEHGQVTLTDNGGQSVVVKTLPDLTDAVSRMMDKTLNGADIPDKAQFVAN
                     LGLSDVVRKSDLANHTHTVSQITDFTDAVRKVLVATLAAGRGVSLAYDNRNSQLSISAT
                     GAGSGSGQGGSGYTVVTRMGTTANQIFTFPISLNGQMDYSFDAYALKEEAGLTSQTVVI
                     DTFSSTSAANYEQTNNVVFDGQLKPYTGETYSMGSDGSFYSSIIKADGISLSVSSYSTS
                     TVVPAMTSANTPAGYIASASSVYNASYAAYYAFDGSVSGNGWISASAPTAAAPQWLEIE
                     LPSQTQITGYIITNPNSVIGGLASPKSWLLQGSNDGSVWTTVHAVSNSTNNTADIDQEF
                     PLSVAANYSKYRLYITDKNSSYAFVSIKKLKLVVGDKCLISESFGNFYTASSGVLTKVN
                     SPSSASEFSTVGFVYSGVISSSALSGKLPIKVWLASNPANNYVRTSYGPPPQIIVPKSL
                     TSVRSLQVISSAQLSATLSGKGVVSVAVSRDLNDWVVWSGSSWVSIGSLSADATGANKL
                     VASGMTASSLGQVTATQWALLFPNTNGVPDNLAFALVLSVPDPSVDGVVVDDLTLNVTN
                     GSAWKKQTEAEVEIRWYPDKVTFKTVAAGNYKLAYQQP"
     CDS             52337..52504
                     /codon_start=1
                     /product="hypothetical protein"
                     /label=hypothetical protein
                     /db_xref="SEED:fig|6666666.356868.peg.66"
                     /translation="MGFWRILFTIILPPFGVLLGKGLGWAFLLNVVLTLLGYLPGLIHA
                     FWIQTRPARY"
     CDS             complement(52578..53132)
                     /codon_start=1
                     /product="Multimeric flavodoxin WrbA"
                     /label=Multimeric flavodoxin WrbA
                     /db_xref="SEED:fig|6666666.356868.peg.67"
                     /translation="MSKIAVVYYSGYGHTKLIAELVAESAKASLIAIDNNGDITDADWE
                     TLNAADGIIFGAPTYMGNAPWQFKKFADASSKIWFTRGWQDKVFGGFVNSASLNGDKQV
                     TLIYLQTLAAQHGGIWVSLGQLPANALASTRNDANNLGGSGGALIQSPSDAGADAIPAG
                     DLETAKLYGARVAEITRRLHG"
     CDS             complement(53250..53441)
                     /codon_start=1
                     /product="hypothetical protein"
                     /label=hypothetical protein
                     /db_xref="SEED:fig|6666666.356868.peg.68"
                     /translation="MVFNVWFIEAPRHAATDLFFQRRHAKPNRLFIFFIIYFKTAWRYC
                     ITLISLIILPPSGYRKVT"
     CDS             complement(53416..54468)
                     /codon_start=1
                     /product="Glycosyl transferase, group 2 family protein"
                     /label=Glycosyl transferase, group 2 family protein
                     /db_xref="SEED:fig|6666666.356868.peg.69"
                     /translation="MISVCMIIKNEARHLAGTLASIAAYFDDIVIVDTGSTDDSRTIAS
                     QFTTNIHDFEWVADFSAARNASLNYARHDWVLVIDADEEIESIDIDALYALIKTHPQAI
                     GRVERINYLDEGTDTTTVRESINRLFRKDRYHYSGIIHEQVTPREISASPVPAFIAPIR
                     LNHVGYKKEILQETDKVARNITLLKQALEMQPDDPYLLFQLGKSYYLKRDYSSAIDYFR
                     QALRFETNFTYEYTEDLVETYGYALINQGDYATAMDILHYESHYSSTDFIFLKALILMN
                     NGQLQNAVDLFIQCTKMPPGNKEGVNAYKANYNVGVILECVGMKQKALEFYQKCGDYAL
                     ARDGIQRLVH"
ORIGIN
        1 tcagttcaaa tcgatacggg tgccgttcag caccaaccct ttaccggtaa tggaaatgtt
       61 gccgtccttg tcgatggcga tgaagccgcc ggcggtggca atcaggatgt cgccgctctg
      121 ggactggatg gcgatattgt ttttcacctg cagcgactcg ttgtcgtcga cggtggtgtg
      181 gcggtttttg gtgacggcga cggtctgctc gccctgaatc tcggtgacct gattttcctt
      241 caccgacacc gtctggttgt gctgcaccac caccgtctgg tcgccgccca cgttctcggt
      301 gtggctggcg ttgaccgacg tactacggtt gttcagcacc acggtattca tgtccttctg
      361 ggcgtggata aacacctctt cctgcccggc ctggtcttcg aagcgcagct cattgaaccc
      421 ggccccttta tgggtactgg tgcgcagcga ggtgcgggtc ttgctggccg gcagcgggta
      481 cggcgacggg ttggtggcgt gaaaggtgcg accggtgacg atgggctggt ccgggtcgcc
      541 ctccagaaag ctcaccacca cttcatggcc gatgcgcgga atggcgatta acccgtactg
      601 gccgccggcc cagccctgac tgacccgcac ccagcaggag ctctggtcgt cgctggcgcc
      661 gtagcggtcc cacgggaact gcagcttcac ccgtccgtac tggtcgcagt aaatctcttc
      721 acccgccggg ccgaccacgg tggcaatctg cgggccgtcc accatcggtt tgtacggcat
      781 ggccgcccgc caggtggtgg tggctttcac cacctcgaaa ctgttgctga gcgtggtcgg
      841 ctcgccgcca ctttcttctt ccagcgcctg tggctgctgg ccgctgtggg tcaccgccac
      901 cacctgccag gccaggttaa acgccgggtt cgggtgctcg gtgagggtaa aggtgccacc
      961 cggcctcagt tcggcggcgt tggattcgcc gctgccggtc atcgccccgg cacgcagcgc
     1021 atccagccgg taaccggtaa acgccttgcc gctcgggtcc tgcttgaagc ggccgggata
     1081 atcaaagtgc tggtaggatt cacgctgatg gtccagctcg ctgctcatcc tgttgtgcag
     1141 cagcccgtag gccggggttt tgaagctgta atccttcagc gccacctcgg cggtactgac
     1201 cgcttcggca taacggaaac gccgcacata agcgccttcg ctcagccctt gtgtagcgag
     1261 attgaagaac agttccgggc ctttggtcag tgcaccggcg tcatcggcga ataccacccg
     1321 gtgcttgccc gcttcgaact cgtgaaagta gaacagccct tcttccgccg ccagccggtt
     1381 gataaacgcc aggtcgcttt cgcggtactg cacgcagtat tcgcgcaccg cgtgctcatg
     1441 gcgcagggca aaggcaaagt cggtaatccc ggcttcttcc agcagggtgc cgataatcgc
     1501 gtccggtttt tgggtctgga aaatacgggc gttggtgcgc aagcccagtc gccacagcgc
     1561 cgggcgcacc tcggcctgat agcgggtgcg gcgaaagccg gtgtcgccct gggcaaagcg
     1621 gctgacgatg ccgctgaccc ggcgctgcag ctcgccttcg taccacacca gcagctcgca
     1681 cggctggtcc agcaccgcgc cgaaatcgat gccgggctgg ctgctggcaa gactcagcga
     1741 cagcgcaaac ggctggttca gcgcctcgct cagttcaaaa tccaccaccg cgaacgtcgt
     1801 ttccggcaac gcgccgacct tcacggtaaa ctgcaatccg gtactgttgg ccacctgact
     1861 tcctccttat tccctgtctg cgtccgcact cagcgatgac cgccgccatc gctcagggca
     1921 ggctgaaaac gacaacaccc ggaccggagt ccgggttaac aggcgattac gcttcgatcg
     1981 gcgcgcgcca gtcgtcggag ccggaggtcc cggcaacggt gtgctcccag tccaccttgc
     2041 ggtaggccag cgacacttcg atcagctggg tgtaatcctg cttggacggg tcctggcagt
     2101 gcggcatctg gttgttgatg tcgacgatgg tggcgtcggt cagggtggtg gtgaagaagt
     2161 gctcctgctt gccttccacc gaggtgcgga accacttcag ggtcacggtc ggcagcattt
     2221 caccggaggc cagcgcgtta tacagcagcg gcacggcctt gttcagggcg acggtgaatt
     2281 tgaacggttt gtgcacgcgc tgaccggacg gctggccgga ctgcgggtcg gtcggcacgg
     2341 tcacgacgtg gttgaattcc tgcaccagca tctcgtcttc gtggccctgc acgtagatgt
     2401 tgccgacgga gtcggaggtg aaggcaccgg cggtgatatt gccctgagtt ttaccttcga
     2461 tgctgatata gcatggagtt ggcatagtct tgctccttgt tgttgaacga taagtgtaac
     2521 ttcagtgttc ctggagcaat tcccgtgcca attaatatct tattgttttt aaatacaatt
     2581 cacttaagta aaattttccc taagtcaaat ttgagcaaaa agttgcgcag acttcccgaa
     2641 aaaacggcat ccattgctca aacagggatt tatgctggaa agtgagcaag aagttgcgca
     2701 gattttgcat ttgttctgat agtggttgtt tagtgagcgg atgttatcca tttttatgtg
     2761 atatttatca cataatgtgc tctgtgcgat cgctggatcc tggtggaaga gtgtgcgtcg
     2821 gggcgaggca gactggatga aaagggctgt gcgtttcact catgacatca tcatctgggg
     2881 aggtaacgcc ctgagctgtc atttcagttt ggtcagtgat ggatacattc ttttttaata
     2941 tggtaaaaca gggcagggaa gtcatcgaaa tgcgacttat tgggctggcg tgatactttt
     3001 tcgtgaaatt gtcagacttg gttttttatg cagtgtagcg aaaaggatat tctgaaatgg
     3061 ttttctgaaa gtattctgaa atgcaaaggg ctgcatacgc aaccccttga taaatttggc
     3121 tcctctgact ggactcgaac cagtgacata cggattaaca gtccgccgtt ctaccgactg
     3181 aactacagag gaatcgttgg aacggggcgc atcttatccg cggtgccctt acgctgtcaa
     3241 cgggcaaaac cgacattctg tgctgactgc ttggcttctg tacaatccgc aggattcggc
     3301 gtcattctgg tgacaaatca acctgcggcg ggttcgcttg ccagtgctgc aaacgttcca
     3361 gcgggctttg acggtaaaat ccgcaaaagt gctggtatac cgccgggaag cgttccgcca
     3421 gcaggtctgg tgcgctgaaa aaatactcgg acagcacggc gaagcactct gccggatcgg
     3481 ttgcggcgta agggtccata ctggcggcgt cttcgcctac cagctctatt tcttcgcgca
     3541 gttcctccat cgcggcatgc agcacctgct cccagcgtgc tacgtcacgc aatggcatgg
     3601 cgggaacccc ggacggccgc tcgttgccgc gcatatccag cttgtgcgcg acttcgtgga
     3661 taatcagatt gaatccggaa agatcaaacg agtcctgaat ctccagccag ttcagcacga
     3721 gcggcccctg atcccagctc tgacccgact gtacgctggg gccgctatgc accagaccga
     3781 actcgtccat ccattcgcca tcgaccataa agggttcggg gtgaatcagt acgtcatgaa
     3841 agccgtcaag ccattcaata cccagttcca gcaccgggag cgcaaacaat agcgcgatgc
     3901 gttgcgccat tagctccgtc agcgccagcc cctgtagcgg caccagacgt ttctggcgca
     3961 gaaactgcct ggacagcatg acgatatgcc ggcgttcagt ttctgccagc ggcgttaaca
     4021 gcgggatcga cagcgcctgc tgccagtccg aaaaagcgtc gggggtaggg gatttccatt
     4081 gccacttcat catggtgttg ctcgctaagt catcacttga attcaaaggc gtcggtttgt
     4141 tcttgttaac atgccataaa acagggcatt ataggcacca cttttacgga gagatgccgg
     4201 agcggctgaa cggaccggtc tcgaaaaccg gagtaggggc aactctaccg ggggttcaaa
     4261 tccccctctc tccaccacta ttcaataact tacggaagat aatttccgtg accgttatct
     4321 atattggtat attgttggta tatcgtgttg gtatatcaac tgactactat tgaataacta
     4381 ttcatcatta ttgattagcg gcagatctaa cgttggcgaa acgctgacct ttctatcgta
     4441 cgttatgacc tgcgcttcgg tcttgtgtcc gctgaaaagt tgcttatcgc gactgctgcc
     4501 ctcgtagtca gaaatgccct tggctttaat atcgtgaaaa tggcatgtta agggacgccc
     4561 cagcttctca cttgccgctg acctcgcttt ccgaaacaaa tcattcagac cagatttgct
     4621 gtattttcca ccctttgagt tagcaataat gtatctgctg ccgccaagct cctttgcttt
     4681 gtttaaagcc gcacgcaacc ggtctgtata agccttgatt tgtttttttc cggttttccc
     4741 ttgctgtata aataatccta aatccatttc ctgagcccat tcgagatcac gcacatcacc
     4801 gcttcttgcg gcacacagat acgctatctc cattgcgcat tgtagtgcca gcgtcgcttc
     4861 gttatagata gccatataaa catcgtcatc gatatagaga tccctgggct tgaccgagaa
     4921 ttttgatatt cctgcacacg gattcgtttt cacataaccc cgctcataac cccagcgata
     4981 aacccggctc atactgctct tttcctgatt tgcttgcgtg cgtgattttt tccccctgat
     5041 atcaagataa cgcctgacgt gctccggctt gatagaatca gccttagcgt taccaaacgc
     5101 gtgcagcagt tttttttgat gctgtaggta gtcagactga gtgcgcggcg acaaatcttt
     5161 gtaatactca ctattaagaa aaaataccca cagttttcca aacgtcatta cgtcacgttt
     5221 agagctaata atcttttcgt atttttccca aacctgcgct atggataaat cacgaatttt
     5281 ccctaacgtg atcgtctctt ttgtttttgc aggtttgaat atgtagctgt atttgttttt
     5341 cctgactcgc ggaggtagtt tgttatcctc aggattaagt ctctttcgtc ccattaaatc
     5401 taaattccat caaagtttat tccggcatca tcatcttcca gctcaggcgc tggcgttccg
     5461 tttaatacgg cgttaacatg cgcccatgtt gtgcgaggat gaccgtcttt atttggtata
     5521 aaggatattc cgttcctggt tagaattttt atctggcctg atgcgtactt ataacccgtc
     5581 agctccatta aatcgtcttc gcttaaaatg tcgttttctt ttcccattat ttttccccag
     5641 cgactttatt atttcgtcag catcggcgca ggccttgtct atatcctgct gagtcagagt
     5701 tttatttctg gcgctgcggg tcagtcggcc tatttttaaa tcaaaatcag ataataggcg
     5761 ggcgccaggt tgccattttt tatacatagt gacctccatt aagaggtcac tatcttattt
     5821 atgattgcgg gttatttctg attatcgata atcagttttt cgcccggcgg attgttactg
     5881 actcgaacat ctgagggtag gtcgtaaaac acatcagcgc gccgatgcgt cactatcctg
     5941 ccaaccctgc cgtctggcag ggtgatgtat gtcggtttgt gcgggtggtg agtccgtttc
     6001 atcattggtt ttgcctcggt gcgggatggt cagcggacct gcagcgacgg ctgcccgatc
     6061 tcaatgtgag cgccggggac gtcaacgcca gcatcgattg cctccttgat ggcctttttg
     6121 tccggagcaa ccagcgtttg gactgtaacg agttcatccg gcaaaaggct ctcattgtcg
     6181 atgatgacgc tggcaactcc tttgcgcgcc gtgaacgtgt tgcgcggcgt cttgagcgat
     6241 gacagaccgg cagccagcag gcaatccagt gcgtattttt tcagctgctt ttcccggttt
     6301 tcaaaagagc acttacgctc agccaggcgt ctggcttcat cgtcacacgt ctttgcctgc
     6361 ccctgcaggt tgcgggtatg gatcatgatg gcatccaatt tatcaccgag ctccatttcc
     6421 atgccgagca ttgtgtcggc gatcatttcc ggggtcagtt catccgactc ttccagcaac
     6481 cgctggagtt ttgccatatc gctggcaatt gcgatagcgg tagtgctcat gctttctctc
     6541 cttctttggc tttcagttcc gcgatgcggg tgtctttcag ttcgctcagg cggcgcaggc
     6601 ggccagacag gtatttagcg tggtcgctgt cgccttttgc ttcggcgttc ttgcggtgga
     6661 cctcaacctc acgcgccagc acgccgtaaa ccttggccgc ctcgttttcg ctgacggccg
     6721 ctttaatggt ttctgcggcg cgccccagtt tttcgtccag ctcttcgcgc aggcgggtga
     6781 catcaaccgc tttttcactg gctcgcttaa tgccgaactc gacttcgttt tctgctacat
     6841 attcagggtt atcatgcata cccagccaca cgtcagcact gaaaccgagc agggaaagtg
     6901 cctttttgat ggcgtcagta aggcttttct ttataacttc cgagtcggtt ttaatcccct
     6961 tctgcgtttt gtacatgtac ggagtggcac cgtacgcctc gatctctgag tgaccgccgt
     7021 catcgttgat gtaccagaat gcgattttca tcgagtgatt caattcggtg ataagcgaac
     7081 catccgcgtc acgcagcagc tttgtgccga tgaatttttt gttgtcgtca taaattgctt
     7141 cacttagtgg cgcgccaggt aacatctttt cttccaaaat gcggtgaccc catccgctgc
     7201 ccgccggacc aaaaatctcc gtagcccgca tgaacatgta ttcgctattg atgctggtgc
     7261 cttcaaagcc agcgcccgtc agcggtttgg tgtaacgagg gtctgtgcgc tgcacacgtt
     7321 tccagatgct gagattttct tgctcgacaa caggcttttc tgcgatagct gattccacgg
     7381 ccgcggcgcg ggcctgaaaa tcatccgcag gtgcaggcac cccaccttca tcattacccg
     7441 cgtaaatgcc atacccaatt tcatcgagct cctggcgggc ctgctgcgcg acgctgaccg
     7501 ccggctccgg ctggctcgct tccgtttttt ctccctgatt tgaggcgcca gattcggggc
     7561 cgatcaatcc gtcgatagag aaacgtccac agccgagatt ttggatgtcg ggctgccgtg
     7621 tggcggtagc cgcgccggca tgctgcgtac catcgtcttc gcgccatgcg gctaaatact
     7681 cgtcagccaa acgctggcgc gcgttcgcat cgttgagcag ttcggggcgt tttttcgctt
     7741 cgcgcagcag ccccagcaac acatcgccgg ggatggacag ggcgccatct tgcagtcgga
     7801 tcgccatcga ccagcgctga aacatctggt catcagattt agccagctcc ttcgctcgag
     7861 ccacatcaga cgcggacacg ccgtcgaacg tgtcggcatc agtcacgagg cacgacgcta
     7921 ttccgatgtc caaccgatcc atgttcgtcc acacgcgctc aactgctggc gcgtctgccg
     7981 gcggcgcgct ctgggtatgg cgatcagatg ttccgtatat ccagttattg acgaacgcgc
     8041 tggcctgcgc agcatcaatc ggcgggctaa attttttctc gatctcggca accagctcgg
     8101 ttacgcgagc agggtacatt gcggccacgg ctgggtactg cgacagcact ctaacgatag
     8161 tgtgcgtgtc gtcatcgcct gattcatcgt cagcaaaaaa atcgaggacg agagagtagt
     8221 cgtggtcatc caaatctgtt ttgcccagta gcaccagcgc tgcgattttc tcctgcaacg
     8281 acaactcagc ggggcgctga ggggccgggt ctggcttgcg cgtccacacg ccatctacca
     8341 gctcgttttc ttccatgaaa tcagtgctga acttaccgat tcccggacgc ggtgagccga
     8401 cgcgatcctc ggtaatggtc ggattaaaaa aattgtcact ggagccgggg aatagctctt
     8461 caatcagcat ggttgccgcc atagcggcca acttctgagt ctttgcttca acaagcgtag
     8521 ccattgcttt ggctccgctt tttatcgccg attttttcgg ctcgaatgat gcgacataca
     8581 tggtcattgg ttttgcctcg gtttaagcgg tggtaattcc gctgagggag agatggtcaa
     8641 tgcattgcag ggttttaatt tggtcttcaa tttccgacgc ctgcaggtga gcagattcga
     8701 taatgctgga ctgctggcgg cgtaactgct cgacgtattt gtttttgaga tcgtctgctg
     8761 acaactgagg agcgggaatt gtaatttcac gaacttctat gagcgtaaac ccgttccatt
     8821 gtgacatgtc acaggtggca acaaacggag cgggattaaa acgattgtga tggatgtaca
     8881 gcttgacgtt gatatctggc gctttcatag cgatcccttt atacttgagc ctccagtgac
     8941 ggcccttggt tgtcattggt tttgcctcgg cgcggggtgg ttcccgcgct gttcccgaaa
     9001 ggtttggtcg ccgatcgggg tgaagaagcc cgcgcaagcg ggcttttttg cttcacaaca
     9061 caacacactc tggcctttta aaaccgaata gacccgattt atcagagcgc gctgtggtgt
     9121 gaaaaagggc ggatagggaa ggtaataacc cacaccgcca aggtcttaca cgcagcttac
     9181 tggcaaggat cacggtccta acgtgatttg gttgtgacgc ccggagtcga accgggcggc
     9241 gggtagggtt tcccgccgat cacctgatcg tcaatttggt tgtggtgccg ggtgcctccc
     9301 ggttttgatc cccgctcaag aatcaaaggc tgagtgttgt taaacgaggt tttgctttga
     9361 acgcgccccg gcgcatagcc ggattcacca caacggtaag ggtattggga ttcggtaact
     9421 acctataatt actgatgtgc tggccgctca agcgcgggac acataacaaa ccaataccct
     9481 tacctgttgt gtgctccgta acgtggagca gacggtctgt ttttaagcct cacggggcat
     9541 tctttacgcg ggcggacgac tcaaccgcgt tcactgccgt gacagggggc ttgtgtggtg
     9601 ttacgcgccc attgctcaat tactaccacc accgcaacga atctaatctg tgccggttac
     9661 gctatccggc gtcgctttac cgacccaatc aggccagaat ttacgaccga acctctggtg
     9721 ttagcgcagt ctttcccgct gtcagaactc attacccaaa ctactgcggt cattggtttt
     9781 gcctcggtgc gaatcatcta cctattcgtg cgccggtagc ggctacttcg tgggcgtcct
     9841 gcctgttcgc tgtcgttgga ataaccttaa ctaaaggtaa gtgaaaaggc aagcaaaaat
     9901 actttcaaaa agttaagttg gcgagcggaa gttattatgc taatgatttt taattatttt
     9961 ttgtttgatt tttttctagc cattaacagc tcttcgaaga gtgcgttaaa tccatccact
    10021 ttctgctcaa ggtctgccag atgacgctct ttttccgact cgggtagaga gtcaaacaaa
    10081 tccaacagtt tacgctgtct gtcatccagc tctgtcggta attcttccgg tgccgccggg
    10141 gtgctggatt catcgccata cagaagccac gtgggtgaac atcggagcgc cctgctcagc
    10201 gagaagaggt tttggccctt aggctgagaa tcgccatttt cccacttgaa tatcgtcaca
    10261 tgggaaacct tcacagcatc ggccaggcgc tgctgtgaca tgtccatttc agttcgtcgc
    10321 gctctaatgc gctcattcag tgtttctgtc ttcatgcgct taatataaat tatgttgact
    10381 tagcttttat taagttttaa attccaaact aaagttacag gtacggaggt gttcgtgttt
    10441 aaaaatgacg caataaaatt tttcggcagt aaaacaaagc tggccattgc tgccggtgtg
    10501 tcgcaggcgt ccgtgtctcg ctggggtgac gtaatacctg agcgacgggc ggcgcggctc
    10561 gaccgcgtta ccaacggtgc gctgcgttat gaccctgatc tctaccagcg tcataacgat
    10621 acccagggtt aacccaaaaa tctgattatc aaaaatcaat gcgaatgcgt aggagacgcg
    10681 gaatggatat cagggattta aaaaacgagg ttgaggattg ggccgcagaa gcggggcagg
    10741 agcgagtagc gatagagata tcgcgggcgc tggcggagct gggaggtcat ccgggcatca
    10801 agttgcacga tatcgagtgc ggcgacgtct ggcgagctat caacaacaac cggcagcaga
    10861 tttttaggtg gttgcgtagc gacacgcgag cagctgacag aaaaattcag gcgctggcgc
    10921 cagccatcaa gcgggcattg ccagctgaac gccgggcgcg gctcgaatcg agcgcaatgt
    10981 acctggtgtc gatcgctatc cgtgagtttt tcgaggccgt gattgcaatc ctgttaggcg
    11041 actgtgacat gtcacagcgt ttggcaacag caaacgcagc aatagcagct gtggcgccag
    11101 tgctacaaca acggctgacc accgtttaaa ccgaggcaaa accaatgaca actatcacgt
    11161 attgcaatgg tttccgtctg aacggcgacc cggcacacat cgcagatatc gtgccaattt
    11221 ttgaagcgcg tcgcgaggct gcgcgctcgg cgtgggagca gtacgaacag cgcaaggctg
    11281 agctgtgcag cgaaaacctg acgcccgatc agtatcaaga cgcatgccgg gcaatcgctg
    11341 aggcgctggg ggtgtgacgt gagtatgcaa ttaatggcaa aggccatgag ctgcaaagta
    11401 ggtaacccgc tgcgaaagct ggtcctgatt aaactggcag ataacgcgaa tgacaaaggc
    11461 gagtgctggc cgtcatacca gcacgtggcc gatcagtgcg aatgcagcaa aagcgcggtg
    11521 aaatcccaca tcaccgcatt gatagatatg ggttttctct ctaaagaaaa ccgaatcggc
    11581 gaaaacagcg ggaaggggaa taaatcgaac gtttactatc tcacgctcga taaccctgtg
    11641 gtgccagaaa gcacagcccc tgtgccgtca aaaagcatag gtatgtcacc atgtgaccca
    11701 cctgtggtgc cagaaagcac agcccctgtg ccgtcaaaaa gcaccagaac ctatcactct
    11761 tctgaaccag tcaatgaacc agtcattgaa cctaaaacac atggtgcgcg agacggaaat
    11821 tattcagaac agtttgagtt gtgctggaag gcttatccaa aacgtgaggg atcaaaccca
    11881 aaaaaccacg cattcaagca ctttcaggcc cgcgtcaaag aaggcgtaag ccctgatgac
    11941 ctgctggcgg gcactcggcg ttacgccgcg ttctgcgcag caaaagggca ggttggcacg
    12001 ccgtatgtca tgcaagcgca gcggttttac ggcacaagcc gggagtttga aaacagttgg
    12061 gaagtatcga ccactccagc accagcgccg cgccagcaga aaccagcgga cacaacgcaa
    12121 gacatgctgg cccgccagta tcagggcggc ggagttaact ggaaattcag aggtgaatcg
    12181 cgatgacaac gactaccgac gtttctgaaa tcctggctgc agattgtggg gtggggcgcc
    12241 ggtttattcg gtcaaccctg cagaatttca cgcccgtcag tgagcaggcg gatggcaacc
    12301 tggctgtatg ccgacagttt gtcagcgagt ggggtcagat ttacgaaaac ggctccagcc
    12361 tggtcatgaa tggccgcccc ggtaccggga agacgcatct agctgtcgca attatgcgcg
    12421 cactgattga gcagcacggc atagacacgt acatgacgac ggcccagcgc atcattcgcg
    12481 caatgcgcga ctcgtggcga cagggcagca accggactga atacgaagtg ctgagttttt
    12541 attgcgaaaa agacctgctc gtcattgacg aagtcggcat gcaacacggt acggactcag
    12601 agcgcctgct ggtatccgaa gtaattaata ctcgctacga acgcatgtta cccaacatcc
    12661 tgatcagcaa ctacacacgc gatgaaatgg acggcttcct tggttaccgg gcgatggacc
    12721 gggtgatgga gagctcagct gtgctggtgt ttgactggga aagctacagg acggggcaac
    12781 atggctgaca tggctgattt tttaccgccg catgatctca atgctgaaca ggccgtactg
    12841 ggcggactga tgctcaacga tgacgaagag cgacgcgccg cggtaatggc gatgctcaag
    12901 ccggagtcgt tttattcacg ggcccatgag cggatttatc gcggactgca ggcgctggca
    12961 aaaacagacc ggccaactga cgcggtcacg ctgtcagctg agctgacggc cagcggtgat
    13021 attgagctgg tgggtggatt cggctatctc gtcgaaatat gccgagtgcc ggccgcagca
    13081 aacaccgcag catacgcgcg catcgttcgt gataacgcaa tagcgcgata cacgcagcgc
    13141 cagttgatcg cgtgtactga aattatcatg gccagcggcg gtaagccgat tgacgaaaaa
    13201 ctggcgtcaa tccagcagat catggggcag atgtttgagc acgcattcaa cggaaagcgc
    13261 ggcggcctac gcccgttcgc tgatgtgctc gctgagtgga tagacgaagt tgatcgcaga
    13321 ttcaccgacc caaacgctgg cgggttgaca ttaggatttt cagggctgga cgaaatcatg
    13381 gcgccgaaat acgtctcgcg cggagcgttg gttgttatcg gggcgcgccc caaaatgggt
    13441 aaaactgcat tctataaccg ggtagtcggg cactttgccc tgaatcatca attacccacg
    13501 ctggcattct cgctggaaat gtctgcaaaa aaaattgtcg agcgaatggt tagccaggag
    13561 gcgcgagtta aatcggagat tttttacgcc ggcacgaatg atgagatgga gatggctcgt
    13621 gcaatggcaa aagcggagga gctagcggaa acaaacctta tgatcgatga caccccagct
    13681 gtatccctgg ctcacatcac taacgaatgc cgacgggtga agcgccggcg tggcgccata
    13741 gggctgattg ccgtcgatta cctgaccctg atgaaagggg agcaagcgga gcggcgcgat
    13801 atcagctacg gcgaaatcac gaaggggttg aagtcgctgg cgaaagaatt ggactgcgtt
    13861 gtactactgc tgacccagct taaccgagcg cttgagcagc gagtagacaa gcggccactg
    13921 ccgtcagaca gtcgcgatac tgggcaaatc gagcaggact gtgatgtatg ggtcgggctg
    13981 tatcgcgacg cagtttataa cgaaaacgcc gacccccagc tgacagaatt gatattacgg
    14041 atgaaccgcg aaggtccgtc aggaacggca tacacgctac tgcgagacag ctatttcgtg
    14101 gacacaacac cggaggatat agcgcagaaa aaatcgcaat cagcagcacc gcagcacgag
    14161 cggcggtaca gaaaaaaaga accgattcaa ccgttttaaa tttaaaccgc gcctgaccag
    14221 cgccaaacaa aaaaagaggc aaaaccatga ctactcaaac tgatgttgta ttcgcaaaac
    14281 acgccggcat gatagatgac ggctgcgacc ataccgtcgt ctttctctgg gaaatgaatc
    14341 agcgggcccg cgccgtcagc cgatcggtat acattccacg tccacaaccg atccccgtcg
    14401 tcaagccgcg cgagctggcc gcaaggaagc cggcgcgccg ccaggccgaa tcaacgcagt
    14461 accgctacgc caatacgctg ccgctggagt ccctaattgc cgtcatgact ggtcgctggc
    14521 tcagcagcca atcaattatg agcatcatca aaaacgaata tccgcagcac actatcagcc
    14581 ctcgtgcgct ggccgtccgc atcagctcaa tgatgaagag ccccagcgtc gacatcgaga
    14641 gtcgggatat cagcgtaacc gagtatcggc tgaatagcgt cgacccggca tatctcgaac
    14701 gttcaaaacg tggcagtgga aaatgacgcg gcagtccgac tacctaccca gcggactgcc
    14761 gcacaatcgc gggctctggc ctcaagaata cagagaaatg gagtggctgg acctgcgggc
    14821 caaccagctt attcacgctc tgattgacgg caagaccgac cgccatctgg tcgaagcgga
    14881 gataagccgc acggcggaac agcatcagga acactttaaa cgccgcctaa attactggcg
    14941 ggaatatctc aagaaataag gcaaaaccaa atgacagaac tgacgaaaga ggcgctgacc
    15001 gacgccatta gatccgcagc agtcaaggcg gcatcaaccg atgaacgccg ggtactgaat
    15061 tacgctgcgg gtgaaattga gcggcagggt aatgaaattg aacgcttgaa atccgatatg
    15121 cgggaactta ctgaggcgat gaatcgcgcc cggcgtacag cgaaagaact gggtgaagaa
    15181 aatcactcat tacgcaatcc ggcatcgaca gaaaaaatca ccgctcagct ggaagggctg
    15241 aaatacacgc gcgccgaacc caatggctgg acatgtaaaa cgctcgctca tgggcgcgtt
    15301 accgacgatg tggccgagtc gtggaacggc gcaatcgatg cgacaattct gactatcgca
    15361 gattgggatg cgctgcgtca tgcgcagcaa gagccgatca taacggatag cgagcttgcc
    15421 agcggcccac gcggtcagat tttcatcaga aagccaacac catcaccaga ggtgccggaa
    15481 gaaactggtt catccttgca gttgcgcaat ctcatccgtc agcgccatgc ggcgtggtca
    15541 caggctacgt tcggtgatgt tggtcctgtt ggcccgctaa gacatctcag caaagaagca
    15601 ctggaagcag cggcggagcc tgaagacctc agcgagtggg ctgatatgca gttcctgctc
    15661 tgggatgccc agcgccgtgc cggtatctgc gatggtgaaa tcacagcagc gatggaagaa
    15721 aagctgaagg tgaatatggc gcgtcagtgg cccgagccaa aagatggcga gccgcgtctg
    15781 cacattaagg aggctggcgc tgaccattcc gagcacccga tcgaattggt cgaaatacca
    15841 gtggagcgtg acgaaagcgg ctactggtcg caccctgcgt ggagtgcgct tttcggcgaa
    15901 cgtgagggta tgccgcgaga cgaactgaac gcactgctgg cgtcaaaaaa cctcgaatgc
    15961 acatatatcg aactggaatg caattactcg accgaaagcg aaggggtggc ctaccgctat
    16021 tttgagaatg gcgacacgaa tatcagcgac tggaacccag caccgccgga aggtgatgga
    16081 tggttcatcg tgtctattca cgaaacggac gatggccctg tttgttggtg ggttcggcca
    16141 attccccaga ttgaagggga taaggcatga gtatttggcc caccgaggtt ttgcagtgcg
    16201 catcatcagt gatccccgca cacccaatga acaatgagcg ccgcgaggcg ctcctatctc
    16261 acatgaatgc aatgtttttg cgtcgcgaaa accccgccga cattcagcgc acggcccaca
    16321 tgctggcgcg ccgtcagcag atagagggtg ctcgcccgga tgcagataac gggctggtcg
    16381 tcgttgggtt tgctggcggt ggcggtagtt gtgagggcat taagcaggcg ctgggattcg
    16441 agccgcacat agcgatgaat cacaacccgg tcgcaatggc tatgcacgcg atgaatcacc
    16501 cgcgtacgct gcattatcct gaagatattt tcagcgttga cccgattgtt tccaccggcg
    16561 gcctgcctgt gcttttgggg tggttttccc cggattgccg ccacttctca aaagcaaagg
    16621 gcggcacgcc tgtcaaaaaa gagattcggg gattggcctg ggtagttctg cgctgggcgc
    16681 tggccgtgcg cccgcgcgtg ctgatgatgg agaatgtgga ggaattccgg ggctgggggc
    16741 cactggtcgc tgacagaaag gggcatttat acccagaccc agcgcgcgcc ggcgagacat
    16801 ttcaaggatt catcgggatg ctcagcaccg gcgtccctcg cgaccacccg gcgattgatg
    16861 aggcgtgtga atttctgaaa atcccgcgtg acggcgatga ggtgaagaga ctgatcgccg
    16921 ggttggggta caacgtagct cacaaagagc tacgcgcatc tgatcacgac acgccgacaa
    16981 tcagaaaacg cctttttgtt gtcgctcgcc gcgacggtaa gccggttcag tggccggagc
    17041 cgacgcacgg cgacccggtg acagcgtcag tgattaatgg gttgctcaaa ccgtggcgca
    17101 ccgcggcgga atgcatagac tggagcattc caacgagaag catttttggc cgaaagaaag
    17161 acctggctga caatacattg cggcgcattg tccgcgggct gcagcgattt gttatcgaca
    17221 accctacccc gtatatcgtg cggattgggc aaacggggtt cggcggaaac ggcatgcaat
    17281 attcctgcga tcagccgtta acaacgatca caagcaaggc cgagcattgc ctgattgagc
    17341 cgtttgtcgt caaagcaaat cacaccagca caaaaacaaa atacgactgt tttaggggcc
    17401 gatcgatgcg ccggccactg cagacaatca cgaaaacaca tgggttttcc gtgggcgcgc
    17461 cggtggttgt ccgccagttc ggtaacagca acgcccagcg cccagatcac cccgtcggta
    17521 caatcatgcc gggtggtggc ggtaaaacgc aggtggcatc tgctgttctt gtgggtgctg
    17581 gcggcccggc atactctggc aagccgcgag atatcaactc tccggcaatc acgctgacca
    17641 ccgaatcaca taccgcgctg gtttcggcaa acctgatcaa gcactacggc ggcaattatt
    17701 cgggcgccgg agttgaggtg gatgagccgc tacacacgat caccaccacc gatcaccacg
    17761 ccctaatgac ttcacacctg gtgaaactga gggggacatg ccgtgacggg caggccatcg
    17821 atgagccaat gccgacagta acggccggcg gaaaccacgt tggtgaggtg cgcgcctttc
    17881 tgaccaaata ctatggaaac gagagggacg gggtcgccgt tgatgatccg atgcacacca
    17941 tcccgacacg ggaccggttt ggtttgacgt cggttcaatg tgagcccgag ccattaactg
    18001 atgatcagcg atacggtgca tggtggtgcg ccaggctgtt cgataaattc agcgatacca
    18061 atgacgactc agatttgttt ccagcaccac gtcagcagta tctgtctgtc ggagaatgcg
    18121 tcattgtcga catctgcatg cgcatgctgg aaccccgcga gttgtacacc gctaacgggt
    18181 ttccgccgga ctacatcatc gacagagacg cagatggtaa cgtcatatcg aaagcggacc
    18241 aggtagcaca ctgcggcaat gtcgtatgcc cgcccgtcgc cagggcactg gtgtatgcaa
    18301 atttgccgga atactgcatt ggggagatgg cagcatgaat gatacacgtg agcgggctgc
    18361 gacccgctgc cggttgccaa ctgctgccta caaggcgatc tggcgtgctg ggttacacta
    18421 ggatggcacg acatcaagct aaccgtgtaa atccacaggt aaagagaaaa aggagcttaa
    18481 acgctccttt tttattgcaa aaactcatta tcaacagaat taataaaaaa cataaatgtt
    18541 tttatgcaat tttgtataat aacataagta attatacgga tatgatagaa gttgttaagt
    18601 ttggttcaag tattccaagt ggtactgttt ttatatacag tataaataat gtgggtcgtg
    18661 agtgggggtt tagtgtctga catcgagtct gtagctgagg ggctcccaga cggcagagcg
    18721 ctaataacga tagaacaggg aaagatagtt agcgttagaa tagttgatga taatgaacat
    18781 gtggcgagcc ttgcggcgct actcgacatt gcaaaacttg ctggatgtgt aattgtaaac
    18841 tctgggaaca agccgtataa ttaatgtgcc ggattgaaca cccggcaacc caaattactg
    18901 cgctatcgag aggataagat ggcgcagtta tcattagtaa aatctccggg cgggatactg
    18961 gttccgtcca cacctgacac ccgcgactat ctgaaccggc tctctgtcgg cgcagtaatt
    19021 tgttgcgagt ttaaaaaggc ccgcaacccc gcatttcacc gaaaatattt ctccctactg
    19081 ggtcttggtt ttgattactg ggaaccggta ggcggggcca tatctcaatc cgagcgcgat
    19141 ttcgttcgtg gattcgtgcg ttatctcgcc agctacgctg gcgcagaaga tgcaataagc
    19201 gctgtcgctg acgagtatat cgaaaccacg ggccgccagc gcgccgccaa tatctccgcc
    19261 acaaaatcat ttgacgcatt ccgccgctgg gtaacagtcg aggccggaca ttacgacgcc
    19321 tacatcatgc cagacggcag cattcagaaa gaggcgcgct cagtctcatt tgcaaaaatg
    19381 gatgacctgg aatttaacga tctgtaccgg gccacgctag acgtgctctg gaatttcatc
    19441 ctgcgccgat cattccccac cctgcagtca gcagaaaacg cggccgcgca gctgctggag
    19501 tatgcagcat gaaaaccatc tatcgcagta aaaagtggct ggccgccgtc ggtagcattc
    19561 agcagtgcgt tctgtgcggt gcttggggaa cccaagtcgc acatagaaat gaaggtaagg
    19621 gcatgggcat taaggccgac gattgcgcaa ctgccgccat ctgcacggga tgccacaccg
    19681 agatagacaa cgggaaaaac ctgacgcgtg aagagcgacg acagcaaatg gatcgcgcca
    19741 tcgtcttgac tattattcag atcgcccgcc agggtctggt ggtgccgaag tgaaaaccta
    19801 caacattacg ccgataggca agccgcgcat gacccagcgc gacaaatggc aaaagcggcc
    19861 accagtactt cggtaccggg cgttttgcga cgaggtcagg ctgaacaaaa tcacactgcc
    19921 ggacggcggc tggcacgtca cgttcgtcat accgatgcca gcaagctgga gcaaaaagaa
    19981 gcgtgcggag ttcaacggca aaccccacca gcagaaaccc gacaaagaca acctggagaa
    20041 agccctgctg gatgcgattt ttgatgacga tagccgcatc tgggatggcc gggtttcaaa
    20101 aatatggggt gaaatagggc agatcattat atgcgaggac gcatgaatca taccaaccac
    20161 atcaccgata tcttgcgcct ccgctggtgc cgcctgcgca tataccgcta cgccggctcg
    20221 gtcgtcattg attaccggat tctgcgcaat tatcaaaaaa cactggtgag ggctggcgcg
    20281 tgaataatca atttttgcag tacgttcgtg aagaaatcat gctggctacc gctgatttta
    20341 gtggcaggac aaaaggccaa ctggtggcgc tggcagaaca gttgcagtac acgaacgaca
    20401 gatacccacg taaacgccag ttcgtcatcg atccggaaac cgaaaagaaa gtcatgctga
    20461 aaaacccacc gatacccggc aagcagtcac gcgcaaaagg gagctctatc ccgctggtaa
    20521 tcccagtcga gtatgcaaca gcgtcgtggc gccgcgctat cggtgtgatt gatgagcatc
    20581 agggtgcatg gttgcgctgg aactatgcag gcgataccga ttttcaactc caggccatta
    20641 ttgtcagatt tggctgggtg gaattcagcg aaggcattaa agggcgacgc attgcgaaga
    20701 aaacgcgtga gcggttgcgg gcactgatct ggctggcggc gcaggacgta aaatttcagt
    20761 tggcagggcg caatgacgac gtttatcagc acgccgattt agcggctctg gcgggcgtaa
    20821 gcaagtcaac atggtcagaa acgtatcagc cgcactggct atctatgacc cggattttta
    20881 ctgaaattga tcgcgctgcg ttgatatcgg tttcaaaaac acgatcacag caaaaatcga
    20941 caaattgcaa atcatgtatt gcaaaaccga actaaatagg ccatatttaa gttcactttg
    21001 atattctgcc aaaactttaa gtggcggcaa tgagcagaga agaagcccgc cttgcgcggg
    21061 tttttgcgtt tctgggggat ctgaattatg tgacagcaaa acggatagac ctcggccgct
    21121 gcgagaagtg gcaagaattc acagcctcgg cattcgccgg ggctttttta tttctacagc
    21181 accgttcccc gcgcgggagg tagaggctat gagaatgcca tacaaacagg atttgctggc
    21241 tgcactgctg gctgcaaaag agcaaggcgc gggcgcggtt ttggcgttcg tcatggccta
    21301 tctcaggggg cgttataacg gcggtaaatt tctccgcacg ctcattgatg cacttatgtg
    21361 cgcaatgatc gcctggttca tccgcgacct tttggatttt gttgggctga gcacgaatct
    21421 ggcatacatc gcgagcgtgt ttatcggcta tatcggcacc gattcaattg gcgccctcat
    21481 caaaaagatc atcaacaaac gcgcgggggt tgaggatgca aatcagcaat aacggcattg
    21541 cgttgattaa gaaatccgag gggtgccggc tgtccgcata tcaggactcc gttggcgtgt
    21601 ggaccattgc atatggctgg actcagcccg ttgacggtaa accggtccgc gccggcatgc
    21661 agattgacca ggctaccgca gaacggttat tgcgctgcgg cgttgttcag tacgaacagg
    21721 ctgtaaatca actggcgaaa gtcaggctga cgcagaacca gtttgatgcg ctggttagct
    21781 ttgcatacaa cctcggcatt cgttccctgt ctacatcgac gttgctgaaa aaactgaatg
    21841 ccggcgatac tgctggtgcg gctgacgaac tcctgaaatg gaacaaagcc ggaagccaaa
    21901 tcctgccggg attggtggcg cgccgcgccg ccgaacgcga gatgtttttg tcatgaactg
    21961 gtcgaaatca gttatcgccg atgtgctgct tttgatgctg gccggcgtgg cggcgatggc
    22021 ggcgtactat cacggccaat acagactgca atctgagcgc gccgacaagc tgcaatctga
    22081 ggtcaacgct cagcagtccg ttatttctca gcagtcgctc cagtttcaaa agttcaacca
    22141 aatcgcaggc catgccagcc ggcaggccat ggcaatcacg gcaaaatcag aggagcggca
    22201 aattgtctac cgcacgatta tcaaaaccga tgcgcctggg cgccagtgtg ttcctgatga
    22261 tgttgctggc cggctgctcg actacgcgca cagtctacgt accgcagcag tgccagctgc
    22321 tcccggagac gctaacacag ccggtgttac caccgctgcc gccggctgcc gactgacata
    22381 cgctcaggcc gtttattggc ttgacccgct actggccgca attgagcgtg caaatgggca
    22441 actggcggcg attcgtgatg tggagcatgc aagaaaaggt attagcgatg ggtcgaaagc
    22501 agccgacggc gccgccgtac aagccaggtg atgtggtgag aaggccatct ccaccaccga
    22561 tgccaccacc gccactttgt tgattttata aaattctgca aatggtgcta acaaagcgcc
    22621 attgacagag ttttatatag gttttcgcga tcgggtattt cgtatattcc cggcggtgca
    22681 tttaacgagg tagcggaaaa ttctgttatg agtgactcag caacaaaaag accgcgcgca
    22741 ccgcagtcat tcatcacacc agcagacccg tatccgtaca cgcgtttaac cccggcaaac
    22801 gatattcacg actggataag cgacaacatc atcagcgatg ccggttattt gcataacccc
    22861 gatcacgtgc atctggcgga agctgacatt gcgtttttgt gggcatcgaa cgcattcgag
    22921 aaaaaggggc gcgccgttct cggccagtgt gaagaggtga tgatgcgcgc cggtggttgg
    22981 cagaaagcca gaatggaaca gcagatgcat gaatggttcg ggcgcatacc gaagttcatc
    23041 atcacgctgg cggccgacta ctgctcgcaa tgcagtgacc tcgagttctg cgctctggta
    23101 gagcatgagc tttaccacat cgcccaggcc accgatgatt tcggcgcgcc gaagttcaac
    23161 aaagagacgg ggcagccagt gcttacactg cgtggccacg acgtcgaaga attcacaggt
    23221 gtcgtgcgtc gatacggcgc cagcaaagaa gtacaggagc tcgttgatgc ggccaatgcg
    23281 ccagcagagg tggctcacat cgatatagcc aggtcatgcg gaacatgcat gctaaagctg
    23341 gcctaacaat atgactgatt atgacaggca ggtaatctat ggcgacactg aaaggtgggg
    23401 tcaaagcctt catcgttcag tcccttgcct gcttcgatac cccatcccag gtggttgagc
    23461 tggtcaaaaa agaatttggc ctgagcatca ctcgtcaaca ggtcgaatcc cacgacccga
    23521 cgaaagcaaa cggcaggggg ctggcgcaga aatgggtgga catgttcaat gtcacccgcg
    23581 aacgcttcca gaatgaaatc tccgatattc cgatcgccaa caaggcgtac cgccttcgag
    23641 tgctcgaccg tatggcaacg cgtgcggagg gcatgaagaa cctcgcgctt actgcagaga
    23701 ttatcgagca ggcggcgaag gaatgcggcg atgcctacac caataagcac aagtatgaac
    23761 attccggccc gaatggtggt gccatccaga cgatcaccat gagcaaagag gaatacaaat
    23821 ccgcacggca ggagatgatg gaggatgacg actgctgagc aaagggcatt tgcccgtaag
    23881 gttgaatgcg aagaggacgg gctctattac gctcgctact tcttcaagca gcgcaccggc
    23941 ggaaagatga ttgtcgcgcc tcaccacaag gtgatacagc aaacactgga ccgcgtcatt
    24001 gatggtgaga ttcagcgtct gatcatcaac gtcccgccgg ggtacacgaa aacagagctg
    24061 gctaccatca acatgatggg tcgcggactg gcgctgaact gccgggcccg cttcatgcac
    24121 ctgtcctatt cgcacaacct ggcgctgctg aactcctcaa ccgcgcgcgg catgattaag
    24181 tcgcaggcat accagtccat gtggccgatg gcgctgcgcg atgacgctga cagcaaggcg
    24241 atgtggtgga cagagcacgg tggcggcgtt tatgcgtcgt cagctgccgg gcaggttacc
    24301 ggctttcgtg ccgggcacat ggaacctggc tggcaaggtg cgctgattat cgatgacccg
    24361 gttaagccgg acgacgctta ctctgagatc gtccgcgacg gggtcaacaa ccgctttaac
    24421 gagacaatca aatcacgatt ggcgatcgag acgacgccga tgattgtcat catgcagcgg
    24481 atccactacc acgacctgag cggctatctg ctgcgtggcg ggagtggtga gaaatggcat
    24541 cacctgaatc tgccggtgat tatcgatagc agccgcagtt acgaagaaac ttacccggaa
    24601 aacacccacg ctatcccgat tgaccacggc ttggctgatg gctggctatg gccgtttaag
    24661 cataacgaat cgcaccgcgt atcgctgttc tctcaccggc gcaccgccga agctcagtat
    24721 atgcagaacc ctaaacgctt caatgcggag ggagcactgt ggaatgagga gatgatcagc
    24781 gccgcacatg cgatgcggat cacactggag ttgtcccgta cggtagtggc aatcgacccg
    24841 caggccacca acagcgaaga gagtgacgaa tcagggattg ccgtcgccag tgtttatggt
    24901 tccggcgatg aaagacagta cagcctagat gcggattaca gcggaaagta ttcgcctaac
    24961 ggctgggcta ccaaagccat tgaggcctac gagcagcacg aagctgatgc gatcgtcatc
    25021 gaaaccaacc agggcggcga tatggcggaa gatacgctgc gcaatgccgg gttcggcggc
    25081 cgcatcatcc gcgtgcacgc cagtaagggt aaatacgcac gtgcagagcc catttccgcg
    25141 ctttacgcac aggggcgcgt cgctcaccgc ggcagtctct acgaggtcga aaatcagttc
    25201 atggaatacg tgccatccac tgcgaaaaaa tcacctgacc gccttgatgc tgcggtttat
    25261 gcattaaccg aactatcaga accacaatcc attggcatgt tggtgcgatc gcgctgacgg
    25321 aggacatcgt gaccgaaagc gaaatgaaac aacagcgcgc cagtaactcc agtgttgaga
    25381 gggagcggaa taaaaacctc tcaatgctgt ttaacggcac cagtaatacc aaacgccagc
    25441 ggctctatca ggaattcggc tacccgctgc acctcacgtt tgatgacttc taccgggcgt
    25501 accggcgtaa tgcggtggct ggtgccgctg tgacgcgcat gctagacggg tgctgggaag
    25561 actaccctga tgtctacgaa ggcgaccaga caaaggacgc atcgaagcaa acggcgtggg
    25621 ataagcgcgt caacaagcta ctgaagcgct gctgggagca gattaaaggc gcagaccgtc
    25681 gtaacttggt tgggcgttac tctgcgatcc tgcttcagat taaggacagc cagccatggt
    25741 ccgagaaagt agataaggaa gtcgttggac gacttcagga aaaggcactc gttaaattaa
    25801 tcccggcatg ggaagcgcaa attgaccctg tgacctggga cgataatccg gacagtgaaa
    25861 cgttcggtga agtgacgatg tactcgttca ccgaattgcc ggttgacgga aactttgacg
    25921 cccgcccggg gcgaatcatc aacgtccacc atgatcgcgt aatcatcctg gccgagggct
    25981 ctgatgatgg cgtgatgacg tcgggcaaat cgctgcttga ggctggattc aacaagctgc
    26041 tggacatcga gaaagtgagc ggtggtgcgt ctgagggatt cctgaagaac gccagtcgcc
    26101 agcttaacta ctcgttcagt gagaagacta acttctccgc actggcgaaa gcgctaggcg
    26161 tggcggaagg gcagcttgct gaagcacttg atcagcaggt ccgtcgcctt aacgacagca
    26221 ccgacagcgc cagttttatg caggctggta ctgccgaggt gttgagtgtg gcagcagctg
    26281 acccagagcc gacctggcgt acagcgctga gcgagttctg cgcgaccgtt cctatccctg
    26341 tgaaagagct cgttgggatg cagacgggtg agcgcgccag cactgaggac gccaaaggtt
    26401 gggggcgcac caggatgagc cgccggaaag gcttcctgac cgacgtaatc accgatgtag
    26461 tttcgcgatt ctggacgctt ggcatcattc cactggctca gaatgaagaa atcactgtag
    26521 gttggtctga tctgctggcg ccgagccagg cagagaagat tgccaacatg gacaaactcg
    26581 cggacgtggc cgttaagtcg acaaacgcgt ttggacgctc ggctatcgaa gagaacgaaa
    26641 tccgcgctgc tggcgaactg cagccactgc ctgagcttga tgatgaggtt ccgcctgatg
    26701 gcaacaaacc aaaacctgat cctctggccg accctcagtc agaagccgaa aagtccggtg
    26761 ataccacggt cgaaagttga ccccacaatg tcgcgcaagt ccgtcagcaa gatggaacgc
    26821 gacattgagg atcggtatta cgcgataaag ttggcgctga aatccctgct tgaccagcgc
    26881 ctgatcgggc gagagcgaga ggtaaacagc cataactggc acttcctctg ccacgacaat
    26941 ggcgcggaca tgcggctcta ccatgtcaac gccggcaagt tcatctacga catgtcggcg
    27001 caggaactgg ctgacctgct ggaggcagtg caggccattc tcgatgacca tctgctggag
    27061 ggtggcgagc aaaacctgtg ggcgatggat tacgtcgtcg cagaagctca gcgcggcacg
    27121 ctggaggcat tcaacaacct ctcgcagcag tcgcaggtgt acgccagcca gacgacgcta
    27181 cagcagctct taagcagtcc cggtcacctt aatcaggtgg cggcagccag gctaacagcg
    27241 ttcagtgact ggaaggtcat cagcgataca gcccgcggag accttaccaa catcatcact
    27301 gacgcggtag cgcgcggcgt gaatcctcgc gagacggcca gcgtaatcag taagcgcctc
    27361 gatgtgtcga tgtcgaaggc gaagaccatc gctcagactg agcaggtcgg cgcgctgcgt
    27421 gaagctcaat ggaatgagac ggactgggct tccgagaggc tcgggctgaa tactggtctt
    27481 ctccatcttt ctgcgctgaa gcctaccacc aggacaacgc acgcattctg gcatggaaag
    27541 gtcagaaccg tgcaagaggt gcgcgactgg tatgcagtag atggtaataa ataccactgc
    27601 tattgcggcc agatcccggt gctgctcaac gacgacggca gcatcttcaa cgaagggctg
    27661 gctgataagc tgacagccga acgtaaacaa tgggctaaag cagcctgaaa atcagaggac
    27721 gcaacgtgaa gctatccagc atccacgtta aatccctcgc catcaacgcc tccaacatct
    27781 caacgaccac catcaacggc caggagcact acgtcattcg tggtgcggtc ccgatcgtcg
    27841 atgatatcgt catgaatggt ggcctgtacc cggcggagga gattaacaac agctaccaga
    27901 cgatggagcg caagttaatg ccgatcggcc acccgatggt gaacggcaaa tacgtgagcg
    27961 ccaacgaccc gcaggcggtc aacgattact acgccggggc atgggctcag aacgtcagca
    28021 aggccaatga caaggtcgtg atggacgttt acgtcaataa ggccgtggca gataccaagc
    28081 ctgacggtaa gcgccttatt cagcgcctgg acgacatgat ttccggcaat aacgccgacc
    28141 cgattcatgt ttctacaggt ctgctgctga acaaagagca aaaggccggg gagtcgaagc
    28201 agaagaaata ctcctgggtt gctcacaaca tgcagttcga ccacatcgca atcctgctcg
    28261 atgagcctgg tgccgggacg cctgatgaag gtgtcggcat gttcgtcaac gctgacgggc
    28321 agcaggccga tgttgaaacg acgagcctca tcgatgccgc caacagcatg aaagacggct
    28381 ggtggaacaa aaccaagttt tatttgagca acgcctcgaa ttactcattc gatgaaatct
    28441 gcgcggcgct gcgaaacaag atgagcgagg gtaagcctga aacatattac ttctggccgg
    28501 aagccgtctg gcctgatcgc ttcatttacg aggaaaacgg caaatacctc cagcaaaagt
    28561 acctcattga cgacgatggc aaggctgaac tcgtcggtga tccagtagaa gtcgtgcgca
    28621 aaccaactga gtacgaagtc aaaaccaacg gagaaacaaa cccgatgaaa gagaagatga
    28681 tcgccgcgct caatgccgca ggcgttaaaa ccgaggggct gaccgacgat caggtctggg
    28741 atgcctacaa ccagcagatg cagaagaaaa atggcggcgg cgacccggac caggctcaga
    28801 ttaactctga tgtgatcact gcggctgtta atgcggcgct aaccccgctg aatgaaaagc
    28861 tgggcaagct ggaaacccaa ctgcaggcga acgctgagag cgacctgaaa accaaacgtg
    28921 acgctgttaa ggcgaaattc tcgttcatga ccgaagcagc gatcaactcc ctttcaggcg
    28981 aagcgctgaa cgacatgtac tcacagtgcc agaccagcac tccgctgaac ccatcattcc
    29041 agctggtcaa ttctgaaaac gaccagtgga aagactacga ccttaacgca ggtatggaag
    29101 aggggactaa ataatggcta acgtcatcta tcgcggcccg gtcgagcgcg agccggaaac
    29161 catcaacctg ccggttgctt cggcgcttaa cccaggcgtg gcagtgaagg ttgcatcagg
    29221 aaagctcgca gcagccgctg atactaccgg ccgctggctc atccttggca accgtcgttt
    29281 catcggccag gcaatcacca ccgcatacgc ggccaatgaa accggcgtgg cgtaccgtgt
    29341 agaaggcgag caggaataca acgtccgtct ggcggccgca gcctacaccg taggccagga
    29401 gttgaccatc ggcgcgggtg gcgtgttcaa agcagccgct accggcaatc aggtcgtcgc
    29461 aacgttcgac gaaaaagcag ggcgcactct ggcggcggaa ggttttgccg acgtggtgat
    29521 cctctccact cagtacgcca aggcataagg aaaacacgaa tgttaaagtt caccaaacaa
    29581 cagcaggcgc tgattcttaa cgcccgccgc cgctgggaca tgatgcagcg caatatggct
    29641 gcacagcacg gatttgcggt taacgatgca agcggccagt tcatcgcctt cgacgaactg
    29701 gttggtaacg catccgtact gccgaaagac gtatggggcg aatgggaccg ctcggcgatt
    29761 accgttcagc gcgatgtgct ggcggtgttt aacgacctgg cggccagcgt atcgcgcccg
    29821 atggcactcg gtaagattgt ccattacttc atgacgttgt ccgattctgg cgacgtcaat
    29881 atcagcctgg atggtcgcag caaagcgaaa accgatcagc ctgtcatgga ttatgaaggt
    29941 acgccactgc caatcatcga tagcgagctt tcgtttggct ggcgccagat gctggcggcg
    30001 cagactgagg gctactctct ggacagcgat gccatttcta accatcagcg caaagttgcc
    30061 gaaaagctgg aagacatggt gctgaacggt gatccaaaca tcagcgtcgg tggcgccacc
    30121 atctacggtc tgcgtactgc gccaaaccgt ggcaccggca cgcacggcct gacccttaac
    30181 ggcgcgacgg gcgctcagtg ggttgcagct atttccaacc tgatcaactt gctgcatgcc
    30241 gaaaacttct atgcgccggt gaccatctac ctgaactaca aagactggtt ctacgcatcc
    30301 gttaacgatt acgcggcgaa ctatccgaaa accattctgg ctcgcatcat ggaaattcct
    30361 ggtgttgcgt cgctggttcc ggcctccaag gttccgaccg atgagttgct gggcgttgtt
    30421 aagcgccctg acgtcgtgca gatcctcaac ggcatgccgg taaccatgcg ccccaaagcg
    30481 cgactgagcc cggaagacga ttatgtcttc tctgtactgg ctgctgcggc gccgcagttc
    30541 aagcgcgacg caaacggcca ggcgggttat gtccaactga ccaaggcatg attcacgggg
    30601 ctgcggcccc atctttttta cggaggccgt atggctggta aagaacaaaa atggctgctc
    30661 acccatgaca gtcacgaact gaaaaagggc gaagtctata aaggtgaaac gctgccgctg
    30721 tggctggttg gtaaagccat acctgtcagc gatcaggtgc tggaggtggc aactcctgat
    30781 tccgaagcgg tagccaagct gcagacggag ctggatgaag caaacggaaa agttaccacg
    30841 ctgaccgatg ccaatacaaa gctgcagacg gagctggatg aagcgcagaa acagcttact
    30901 gaactgcaga aaaaggcgaa ataaccatgg cggcccagat aactgctgac gaagcgtctg
    30961 cgttgctcgc tgagctgggc tacagcatcc cgtctgtggt gctgggcttg ttactggatc
    31021 aggtcaatgc gatcgacgaa tgccttgatg ccgccggaca ggacgacaat acgcagaagc
    31081 tgatcaagct gtatgccgct gcgctgcttg ctgcctcgtc gggtgcccgg cgaattaaat
    31141 cgcgtggggc accgtccggt tcgtcccagt cattcgacta tggggaggac ggtatcacct
    31201 ggttgcgtga ttcgctgatc cgcctcgata ccagcggctg caccggggcg ttgccaatta
    31261 gtgccggcaa tagcgtgggt ttgtttatgg ttgtcggggg ctgctgatgc ttgaagcaaa
    31321 acaaatcgcc gagttgctta accagttatt tgcgaccgac ccttcggcgg cggctgccct
    31381 ggtcaatcat cgcgtggtat gtaacgacga attcctcggt agtgacattc cttcgtctgc
    31441 tcgcagtctc gtgatggtgt catcactatg ggtgtcgtcg ggtttgttaa tgcaatggcg
    31501 aagcccggca ctggctatgc cgctgcaatt tacggcgatg acaaccaatt gactggcttc
    31561 actgtcgtag gggctgattg atgacgtggg tatcagtaag cgtccggctg ccgcgttcgt
    31621 tcacccgcgt atgggtgatg accgacaccg ggcggcagac taccggctac gtcaaatcgg
    31681 acggcgcgtg gtttattaac tgcccgcgca ttcgggccgc cggcgctatc gtattgcagt
    31741 ggagggaata ggtatgtcgt cagcagcaaa ctggagctac acggcgaagg cgaccgtgtg
    31801 gcgcaagctt gcagggaatg atgagtacgg cgacccaatg ggctacgccg cgccggaagt
    31861 catcatgtgc gattaccagg gcgggctcag caagaagtta gccagtctgg gcgctgaaat
    31921 cgtcgtcaaa aatacggtgt ggacggaata tgcgctggcc gatgctggtg attatttgct
    31981 gatcggcgaa tcaacagagg ctgacccggt ttccgccggc gccgacgagg tgcggcaggt
    32041 tatacgatac gccgacacgt tcgagcgact ggcagacgat ttcgccattt tgacgggggc
    32101 ataatcatgg gggcaaaagt ccggggtata gcccaatcaa aacgcggact ggagcggatt
    32161 atcaacgata ttcaggggcg taaagccgtg cgcgccattc aatcggcaat gctgattggc
    32221 gcggcacagg cggcactgta caccccgatc gacacgtcta cgctgctgaa cagccaatac
    32281 cgggagctaa acgtccgcgg gacccggctg accgggcgcg tgggctactc ggccaactat
    32341 gccgtgtacg ttcatgaccc ggatgtgccg caggcattcc gacgaactac ggcggaaaaa
    32401 gagttcctga ctaagggttt tgccgatacg tgggaacaga tcaccgaagc aatgcgtaag
    32461 gagttggcgt tatgacaccg cttatatatg agcgcgtgcg caatatgttc ggtgatgccg
    32521 gactagctga cggctttacc gtccagttgc tgatgtacga cgacccaggc gatctatcaa
    32581 aagcagtgat ggtgttccgg ccgaacggcg gtaccgctat ccgtaacgac ctgggggctg
    32641 aacattatgt gctggtggat atcatcgggg ccaaagacaa gcgccgcgat gccgccagcg
    32701 cggtgcagcg catcatcgac tatgtacagg ccaacccgat gggcgatgag tgtgtgggct
    32761 ttatccagaa catgggcggc atcccgccgc cggtactcac agaggacggg cggatagtgt
    32821 ttcgtctgca attcgcctgc aattatgggg aataaaccac cccagaatta tcgccacccg
    32881 cgggtggctt ttttatttcc caaatcacgg agaacgcaat gagcgattgc actaactcta
    32941 atgagcgcct attcggcggc gcggtcgtgc tggaagttgc cgatgggtgc ccggacgcga
    33001 aaccggcaga ggccgactgg aaggcgctgg cggccggcac cagcaagggt tttgacttta
    33061 accccaacac ggtgacatct gacgctgacg atggggccgg ttttgttgaa accatcatca
    33121 ccaacagcga tttcaccatc agttttgaag gcgaggtgcg caagaaagac cggcttgatc
    33181 agtacggaat cggtaaatat atcaagtact tttcgactga gcttgcggcc aagcgccagc
    33241 ccggtatctg ggttcggatg gactatggcc cggtagagtt cgtcggctat atgaacatca
    33301 ccgcactgag ctctgacggt gggaccaatg atatcgtgac tttctcaacc gaattcaaag
    33361 tcggtgacgc gagcacgatc gaggttaacg aaactgacac cgtggctgta accggcgtca
    33421 caatctcgcc gactaccagc accggggccg ccggcggaac gagcacgttt acggttaccg
    33481 tagctccaac tggcgcgaca aacaaaacgt ttaccgtggc ctcaactgac ccaaccaaag
    33541 ccacagcgac ggcgtcagga acgacggtta cagttagccg tgttgccgcc gggtcggcgc
    33601 aaattgttat ctccaccgcc gacggaaatt ttgtagcaac ccatacggtc accgtcagtt
    33661 aacgggcatt acaaaggcca ccagctggtg gccttgataa tgcgtgttta cccaggggga
    33721 accatgactc cactgaaagc gatcggcgag tgcgtgattt cgacacgtca gcgcgattat
    33781 ctgctccgac cgtcattcgc agctatgacg cgaattggtg agccggctga ggtggtccgg
    33841 gctttttatg acctgcataa tgacgaggcg cgccagctca ttgaacgcgc cattgatgcc
    33901 tacggcacag caccagcatg gctgataact cacgtgtcca gaccgatatt cagcaggcag
    33961 gcggtgctgg cggcgataac ggtgctggcg gcgtgctgcg atactgattg ctcagccctg
    34021 accggggagc tggtgcccag gaagaccggt aaagacggcg ttatatggcg ccctggctca
    34081 atgccggctc ccgatctggt gctggtggcg cagtcgctga ttacccacgg cattattggt
    34141 aaggccaagg tgcggcgttt gcagcgtcac gagtctgccg agcgtacaac cgaattccac
    34201 gctgtcgagt acatcaatgc ggcgcgctcg catttcggca tgagtcgaca ggaggccgag
    34261 aacctgacga tgaccgaatt catcatgctg ctggccgcca aatatccaga ccagaagggg
    34321 ttcacgaggg aggaatacga cgcggtagcc gatgactact tgcggcgaaa ggcggcgaga
    34381 ctgacgaaag aaaacaccca ctgaactccg tcaactgatt tgaaatccat caacccacta
    34441 acttagcccc gtcagccgat ggggcttttt ttatccccgc gcttcacacg cgcacgttat
    34501 aatcccagag cctacagaaa gccgagcctg agagttgccg ttggtggcga ccttctggga
    34561 ggcggctgct ctgtgtgaca ggctctgctt tctataggca aatcgctatg aattatccaa
    34621 ccgtatcagt aaacggcgtt tccgttcgtg ttgatgacgc cgggcgctac agtctcaatg
    34681 atctccatgc cgcagcggtc gcaaatggtg aggctactga atctcaaagg ccaagcgtgt
    34741 tcttgcgtag tgcgcaagtt aaacgcttca ttaaggcatt acaggccaaa gcactaaaaa
    34801 gtgcttcgga acaaaatcag ccacttagag tgacgaaggg tggcgatgaa accggtgctt
    34861 ggggtgttga gatcttagcc atacgctatg cagcctggat taagccggaa tttgaaatcg
    34921 aggtatacga ggtgttcagg atggcgattc gcctcggtat cagtgccatg tcccgcctga
    34981 ataagattga ccacatcatc agcacagaaa ccaaagagat cagccagtgc gccagaaaaa
    35041 tggctggatg gggtgcgggt gggcgcaaaa gactgctcca ggctgcgcga gaacgggcag
    35101 ccgatgaagt gcagatgtac ctgccgggaa tagaggcgtg atgtcgtggc gcgtccatgc
    35161 gccgaaggcg tcaacctaaa ataccggcaa tgcgggttgt taactcatct tttgtcatga
    35221 tgacgaagcc gcgtttctgg agtagctcgg tcattgtttt tacgctgata aggtgctcat
    35281 cttcacgagc tatttcggct cgatccatcc ggccatctct aaaggtcagg agtacgcggc
    35341 cactaaatag cggagaggat accgggcgat tgtctattat caggcagtgg atgtactcaa
    35401 tcgcctgtag catttgtgtt tgagtcaggt cttcgatgcg ctcgacatta aaacgctggt
    35461 gaatgagtga ataggcatcc gaatagatca tcccggtttt gccgaccagc aggttaacag
    35521 cgtcacgcaa tggtgtgcgc tccagtgttg tggttttctc cgggcggctt tcgcactggt
    35581 tgaagtagca atcttccaat ttctcgaaca cgtcccacgc ttgatctgtc tccagcatct
    35641 tggcgtgacg ggcggcaccg cgttctgtcc atagcgttaa ggcgcgaata tttgtaggga
    35701 ttttcacaga gtctcttaaa gatactctgt gctttatttc gcttaattct gaaccggtta
    35761 gcttaaaaaa gtgcttccct tcaacaaagc gatcacggtt tctctgaaaa ttgttgcgga
    35821 tgcgaacgga gtcagtgccg taaagctgtg ccagcagttc agtggtgata accggtattg
    35881 agttgtggct gatggctggc agggtttcta ctgtgaatgt agtcatgacg acctcttttg
    35941 gtttctttct acggaaatcc acgcaagtgg gtgtcgggag gttagaaacg gcccaaaaga
    36001 taccgcgaac ttattcccca ttgctgggtg ttgtattcgt tgccctcccg acattattcg
    36061 gggtgtggtc gcgcactgcg cccactgaat gacaggcata aaaaatccaa cgctatcggg
    36121 gttggttagg accgcttttg gagaggtttc tacgcctcgt gacacagaat gtagcggata
    36181 gtgatcgggg cgtcaacgat tagtcaataa ctggcgctcc tggcagatcg taaaccatcc
    36241 ggcattcaac atcagggtga ttgacaggga ttgcactaaa ttgccactca tgtgaacagc
    36301 caatgacatg atcgcgccag cgccattgat agctaacggg gcgtggtgcc tttgttgcga
    36361 tatcaatgat taattcggcc agctcttggg cttcgccaga tttaggtttg caaccctgcg
    36421 atagctcaac tatccgttga aatgacagcg ccatagtgcc ctccgtgtcg atatgcgcag
    36481 cgcagattac tctacttctt gctgttgggg aatggcagga acgggagcct gacccggtaa
    36541 aaacaggcta tccacacggc caccggtagg tgctaacatt agtttcttta actgatgggg
    36601 atagggatgt gaggaaggca ttaattaccg ctatattttt tttatctggc agcgcgatgg
    36661 caagtgatta tctaacctgt tcttatgcca aggctgatat ctcaaaaggt gttggcgcgc
    36721 caatgatgaa tatgggaagc agtagagttg aggttagtgg ctcatcattc aaggcataca
    36781 ggccagatgg aacttatata atgacgccgc aacttacaac aaaaaaggac gggttactaa
    36841 ttagcgatga tggaaataaa gtatttgcag cgagtgtaga taaaagcaac tttgccgtat
    36901 ctgatagaat aagcaaaacc acagagcagt gggcatcatg cagagttgtt agcgatgcaa
    36961 tcagggattt ggaaaataaa gaaaacgaaa taaaatccat tgaaaaaatg actgtttctc
    37021 aggctaaagc atattttatg acagagaaac atgcattcac cactaactgt cttgtgtggg
    37081 acgatgtaac aatgattacg gggaaaaacc cagccatgat cattgcaggc ggtgttcaaa
    37141 tggggaaagg cccaaaatgg aacggtgagg aatattcatt tacattcaat aatggctcaa
    37201 tgatcgcgag atttaaacct tttgaacctc gccataaatt ccttatccaa gctggagata
    37261 agttttatgg ttgtggccct tcctttattg aacgtggtta tgattaattt aacgcagtat
    37321 agccaaaacc ccgctcgcgg ggttttttta tgcccggaga aaagtaaatg ccgactaaag
    37381 caggtgagat ttattacgat atcgagttag aaaccgcaca attactgtcg tcccaacggg
    37441 aggcaaattc cgcgctggac tctctggggc ggggcttcac gcgaacaacg cggagtattg
    37501 aagcgacaga aacggccatg tccagcctgt cacgtgttgc ggtggcgctg acggcggcat
    37561 tatccgttca gcaggtgtcc gaatatgcga atgcttggac gactgttagc aacaagctgg
    37621 ctaactctgt gcgtccacat gaacaactgg tagacgttac tcagcgtgta ttttcgatca
    37681 ctcaatccac tcgctccagc ctcgatgcta ccgcgtcact gtatgcccga ctcgaacgcg
    37741 ccactcggca atacggcacc agcgctggcg atttggcccg cctgaccgcc atcatcaatc
    37801 agggattcat cgtttctggt gccaccacgc aggaggcgga gaacgccatc atccagttat
    37861 cgcaggggtt ggcatctgga acactgcgcg gcgaggaatt taactccgtc aacgagcaag
    37921 gcaaccggct tatggtagcg ctggcggatt cgctcggcgt cggtattggg caactccgca
    37981 acatggctgc acagggcaaa ttgacaacag atgttgttgt taaggggttg ctgtctcagg
    38041 gttcaaaaat cggcgcagag ttcgccaaaa ccatcgcaac gacctcccaa tcgctggaat
    38101 tagccaaaaa caacatcact aaatttttcg gcgagagtac atccgttcaa accggactat
    38161 caatttttaa taacgcagta atctccgcca gtaaccatat ggagataatg ggcagtgcgc
    38221 ttgccgccgt agcggttgtg cttggtggtc gctttgctgg tgcgctgact atggctgcgg
    38281 cccagcaggt taaatccata gcggccagta ttgccagtgc aaaggcggcg gcacaatccg
    38341 cagcggctgc cgaattggat gcggcggcac agcttcgact ggctcaggct aacaaggaca
    38401 cggccctgtc cgatctgaat ctggcgcagg cgcggctgaa tgtcatccgc gaaacgaatg
    38461 cggcaggtgt ggctgaggtg gcgttagctg actccaaagc ggctagtatc aggacgaatt
    38521 tggctcaaat tgaagcggaa aaagcattag aaactcaacg gttgaaggcg cagatcagcg
    38581 agcagggccg cattgctact gcaacgcgca tggctgaact gcaacgcgca tctaccgctc
    38641 ttaccgctca actggcaaca accgaggccg ccgcgtctca ggctagggca acggcgatag
    38701 cgcaggcaga ggcgcaagtg tcctctgctc gtttagcgac tgctgatgcc tccggcgttg
    38761 ccgccgcagc gaatggtaga tacgcagcat cacaagagat ggctaccgcc gccacaaaag
    38821 ctgcaaggac atcaatagga ctgctaaacg gcgcgctggc attgatcggt ggcccgtctg
    38881 gttttgctat ggcagcggct gcaacagtgt tttttcttta ccagagaatg cagcaagcca
    38941 aacaagaaag catcgatttt gccgataagc tggatggtgt tatcgcgaaa atgcgcgaga
    39001 tgagcttcgc gcaactggat aaagaagtcg caaaagggga aaaatccctg attgctcagg
    39061 ctgatgcgat atctgattta aaaacgcaac tcatcgagtt gcgtgccgag gaatcgaaat
    39121 acactggttt gatatctcaa tataaatcag agggcgagtg ggggaaaaac cttgccgaca
    39181 tccggcgtaa aataaggatc gccaccggcg agctcgacga agcggagacc aagcgcagcc
    39241 agacggccag caaagtcggg atcattcagg ctcagatgaa tggtcagctg aagcaggggg
    39301 ctgacttgct ccagcggaac agtcaagaga ctggcgtagc tgctggcatg atgaataatt
    39361 taggccagat gattaatttt gcagctaaat cgaaggagag atttaacgcc acgtcgctga
    39421 aagtgacggc taacccggat gcacagaagg agatagatga cctgcaagag caggtcaaac
    39481 tgcttggcat tgtcgataaa cgccagcgcg ctatcacaga ggctcaggat aaagcgaaaa
    39541 ccaagggcgg aaacactaat cagattcgcg aggctgggga gtacgcggcc aaattgcacg
    39601 acctgaagga agcagaatca gatcgggaaa aagcccaacg tgaagctgaa tctgaggcca
    39661 acaaagccgc caatcagcag caatccatcg cgctgaaact tgaaaacctg cgtcaacaaa
    39721 cggaaatgac ggcagagtct acccgcgaac tgacccgtga acaggctgtg ctgcgtgccc
    39781 agcagtctct aggtggtggc gccactgatg agcagatcag gctggccggg gagttagccg
    39841 gtaaaaaatg ggacgtggct aacgccatcc gcgccgaggc ggctgctcag aagatgctac
    39901 cagaaacagc ggagaacaag agttatcagg atgatttgaa agacctgaag attgcgctga
    39961 ccagcaaaaa aatatctcag gagcagttta acactaccgc cgagcgactg gagcaggagc
    40021 accaggcgaa gctggcaaaa atccgctccc agcaagcggt aacgccaacc caggaggcgc
    40081 tggggcaggt tgaccctgtg cagcaactgg cgaatcagca tgcgcagcaa ctggcactaa
    40141 tccagcaatt tgaacagcag ggtgtactgg cgcatgaaaa tgcgctggca ctacgcaacg
    40201 ctgcagatac gcagtacgag caacagcgca tagcagcggc gtggcaaatc tgggagcagc
    40261 agaacaccac aaacaagctg ttggggtcag caatcgattc gatgagtagc tcggcctcaa
    40321 gtgcgctaac tgggttgatt aatggcactc agagcctgca gcaggcgctg gcaaacatcg
    40381 gatcaaccat tctcaacagc gtaatcagtg cattgattga aatgggaatg cagcaggtta
    40441 aaaacgcaat tatggggcag gcggcggcaa ccgccgcact tgctgccacc acagcgcaag
    40501 ccaccgccgc cgcatcggca tgggcgccag cggcgatcag cgcgtcaatt gccacgatgg
    40561 gggcggcatc cactgttggc acaaccgcat acactggcgc gctggcggca tcaaaaggct
    40621 tggctatcgc cggcgcccgc tacaacggcg gccccgtctc agcagacagc ttgtatcaag
    40681 tcggcgagca cggtaagccg gaaatattca aggctagcaa cggtagccag tacatgatcc
    40741 ccggagataa cggctctgtt atcagtaatc gggatctggc tggctcttct ggcggcggag
    40801 cggcggttac ccagacaaac catttcacca tcaacactac cggcggtatt gatgacacca
    40861 caatggcaaa gctggctgca atgatgaagc aggtcagttt gagcaccata aaaagcgagc
    40921 agcgcccgaa cgggctgtta aggaaatgac atggcggaag tgttcgtctg gtcgccacag
    40981 gccagtatcc agctcacgcg tgaaccaagc gtatctgtcg tgaagttcgg cgacggctat
    41041 gaacagcgac aagtgaaggg gatcaactcg gtgatggata aatactcgct gacgttccgt
    41101 ggtgtatctg gcatgtgtgg gcgagaaaac gtcgctgtgg ccgcagaagc attcttgaaa
    41161 gcacgaggtg cggtggagtc gttctattgg acgcctccgc ataccggcgc gccggcgctg
    41221 tttgtctgtc gaagttggac gttaacgaaa aatcacgggc tgtatgaact gacagctgat
    41281 tttgagcaag taccgcgata agcctcctta tgggggcttt ttaatggggt tgttatgcgc
    41341 gatataccat ctgaactcat tattcaaagc gttgatgccg gtgttggcgc attcatcgac
    41401 ctattcgacg ttaacctgca gccgctcggt ggcgacatta tccggtttca cgccggcacc
    41461 aatgactatt atggcgacgt gatctggaag gggttggcgt attcagctta tccgatcgcg
    41521 gtggaagggt tcgaaaccaa aaatgaaggc gcctacgccc gaccgacgat gaaagtcgcc
    41581 aatatcaccg ggcttatcac cggcatcaat gctgattttg atgatgcctt gggcgcagtg
    41641 gtgacgcggc gtcaggtacc cgtcagcgca ctggatgccg tgaactttcc gaacggcaat
    41701 ccagatgccg atcctacgca agaagcggtt tctcgttatg tcatagagga aatggcggaa
    41761 gagacgttcg aaaccgtgac ctacaacttg gcgacgccga tcgactgcga caacgccatc
    41821 atcccggctc gcacaattct ggccgacgtg tgtcagtggc tttaccgcgg tgacggctgc
    41881 ggttataccg gcggcccggt tgccgacgag cgggacaatc cgacgggtga tgcatcgaaa
    41941 gaccgttgtt cccaccgcaa gtccggctgc cgcctacgct tcccgaaacc cgccgtcctg
    42001 ccgattggca cattccccgg atcgtcgaag gtgtcgtgat gttggagcaa gaatgtatcg
    42061 actacgccgc cggtgagccg gggcgggaag tgtgcggatt ggttgttaat gatgatcaac
    42121 tggtgaaatg ccggaacata cactcaaacc cggcagagcg cttccgaata agcgacgatg
    42181 actggttaaa agcagaagcg gcgggagaaa tcaccgccgt ttttcattct catcccggta
    42241 actcgctggc gctatccggt gccgatcggc agatgcagat aacgaccgct ttgccgtggt
    42301 ggctggttag ctgcggggtg ctacgcaaat tctgtcccgt cccccatcta ttgggaaggc
    42361 agttcgaaca cggcgtgacg gactgctaca cgctgttccg ggacgcatat cacctatgcg
    42421 gcattgacct tccagatttt gagcgggtaa acggctggtg ggtacggggc gaaaatcttt
    42481 atctgaaaaa cctgacagct aacggattcc gcaccatagc gcggcaggat atccaacccg
    42541 gtgacgtgat tatccgccgc ccgttccccg aagccgatcc gtgccacgcc atgatttatc
    42601 ttggcggcgg acaggtgctg catcacgact gcgccggccg gctgagccgc cgggagccat
    42661 accgaccggc ctatgtccag caaacacatt cgatatggag gcacgaacag tgctcgtctt
    42721 taaatttgca gggcatctac gccgacattt ccgccaaatc gtactgaatg tggatacgcc
    42781 cgcacagggg ttacgtttgc tgctagcgca gtgcccggca ttcaaacgcg atttttaccg
    42841 cacccgcgtg cgtatgcgca ttgctgggga tgacgtctcg cctgatacgc tggagtttca
    42901 catgcaccgc cagccgcgcg atggctctac cgttttgttt gtcccaatag ttgatggggc
    42961 tattgccgcg gcgccggcct gggtgatttg gacgatggtg gcggtcagcg tggcatctgt
    43021 tgcgtattca atttattcgg ctcggaacat gaaaaccaaa acatcggccg aggcagcaca
    43081 aaccaactcg attaccaaca actcgttcac cagcgctgaa aaccgggttg ggcagggtcg
    43141 accggtgccg atcctgatgg gtgaaatggt ggtgggttca aacgtgattt ccctcggcat
    43201 cgatacaacg aacaacaaag actggaacat ttctatcagt taaggagcgc acatgtcttc
    43261 tggcggcggc ggggccagca ccccgactct tctcaatgat aacctcacat ctaaacagtt
    43321 ttaccgcgtt ctcgatctga tatctgaagg cccaatttat ggcccggtcg accagaccta
    43381 tctttcgtcg ttcttggtga acaaaacccc agtgactagc gcgtcaggtg caacgaatat
    43441 caatggggtc agtgtggcgt ggcggcctgg ctcgatggcc cagccgccga taatgggctt
    43501 tgatgccatt gaggctacca ccattgttaa caacgcggtg acgtttgaca cgccactggt
    43561 ccgtactgta actgatgacg atgtggctcg ggttcgcgta aatctcggcg taagcgggct
    43621 tgtccagcag gacacggcgg gcaatcagtc caatacatcg gtaacaatgg tgattgaaac
    43681 ccgcgccggt agcggcgggg cctatcaaat tgccaagacg gtgactatca gcgggaaaat
    43741 atccggcgag tacctggagg ctcacatcat cgacgccccg gacacgaagc cgttcgatat
    43801 ccgcattcgc cgcatcacac cggacagcgc cagcgatctg ttgacaaatg ggactgtatg
    43861 gaacagctat acggaaatta cggatgacag cctgaattac ccatattcag ccatagccgg
    43921 cgcggtgatt gaccgcagtc agtacacaga cacccccagc cgcacgtatc acctgcgcgg
    43981 aattatcgtt gatgtgccgg acaactatga cccgacaagc cggacatact ccggcatttg
    44041 gacgggtggt tttaaatccg catggactga taacccggca tggctattcc gggcgctggt
    44101 gaagcaccag cgctatgggt tggcgcgccg ggccggtgat attgacgtgg atgatggtgc
    44161 gctgtatgtg ctgtcgcagt tttgtgatca atcggtcaac gatggatacg gcggtaccga
    44221 accccgattg cgattgaatg catacatcac agagccggcc aacgctcgcg agatcctgga
    44281 caagatcgcc agcatgttcc gtggaatagc ggtgtgggat ggcatgcgcc tatctgtgat
    44341 gattgataac ccacaagacc cggtcgcatc tatcaccaac gccaacgttg tagatggcct
    44401 atttaccggc agttccgtgc cgcgctcaga gcgctataac gctgttgttg tgtcctggac
    44461 taatccagcg aacgggtggg agcaggataa agaatacgtt tccgatgaca cgctgatcgg
    44521 gcgttacggt tacaacgaaa ctacgcttga agcatttggc tgtacctctc gcggacaagc
    44581 ttaccgcgct ggccgttggc tgctggaaac cgctaagcgg gaatcgcgta aagtcacgtt
    44641 ccggatggcg cgagatgcga tcgccttcat gcccggcgac attgttgaag tcatggataa
    44701 caactacgca ggcacacggc tgggcgggcg tatcttgtcg cacggcgggc aggcggtaac
    44761 ggtcgatgcc gacatatcgg cgctggtcag cagcggagac accatatcga tcatgggatc
    44821 aaccggaaag ctgactcgcc atgaaattca gtctgtatct ggtcgtgttg taaccctgaa
    44881 agcggcaccg gcttatgtgc gtgacggtac cgtgttcgtg atctctactg gcgaactggc
    44941 ggcccggctg ttccgtatca caagcgtgaa agaggatgaa aacaactcga catatacaat
    45001 cactgcgcaa catcacgatc cgaataaaca ggcggtggtg gatgagggcg ctgtgtttga
    45061 tgtaccgacc gacaccctta acgggtaccg ggtgccgaac gtcgaaaatc tgcgcattgt
    45121 taacgtcgcg agtgagactg tgcaggttcg cgcggcatgg gaaactgcta caacaaccag
    45181 aaaattggtg tttgagctgt acgtgtataa cgaatctggc gcggttgtag cccagcatga
    45241 aaccgaacaa ttccagtatg aattttatgg actgaatgct ggtaactaca cgctgggcgt
    45301 gcgtggccgc aacgataacg gtatgaaggg ggcggaaacg caggtcagta tggtgatcgg
    45361 cgcgccgctg gcgccgtcca gcgttgtctg gacgcctggc atcttctctg ccggcttagt
    45421 gccggtgatg agcgtcagcg ctaccaccga cactacgttt gaattctggt attcatcgga
    45481 aacgcgaatc actgatatca gcagcgtgac gacgctggcg cagtacctgg ggcgtgcgac
    45541 ccagtgggcg ttacatggac tgcgggctga aacgacttac tacatgtacg tgcgcacgaa
    45601 aaacgcgttc ggagtgtccg ggttcgttga ggcatccggg caggcatcag cagacattcc
    45661 aggcatgctt gaatatatcg acgaggcaat tagggacact ggcgcattcg acaatctaca
    45721 aaatggcatt gatggaaata ttgaagccac actgcaaaac gccctggcga caaatgcggc
    45781 cgttgagcgg caatacgcac aatacggtga ggtgcgcgcg gatgtcatca caatacgcac
    45841 cacggtggcg gatcttaacg gctcgcttgc cgagttgact gatattgttc aggctcaata
    45901 tggagaactc acggctgcag ttaatcagaa actcacggcc gaagtgacca gttccggtgc
    45961 ggccagcgcg ttttatacgt taaatctcgg cgttattcgt gacggaacga aatacaacac
    46021 cgggtttgga atggggatag agccggacgg aaatggtggc tataaatcaa cagttgtatt
    46081 ttccgccgat cagtttggtg tttattctgg cagtacgccg ggtaattatc aaagggcgtt
    46141 ttttatttat aacggccagg tgtttattaa ttctgccttt attcaggacg gaagcatcac
    46201 aaacgcaaaa atagccaatg cggcaatcac gaatgcaaaa atatccgggg cgatctattc
    46261 ggacaactgg aatggggtag tcggctggaa tttggataag gccggaggtt ttcagatggg
    46321 tgcgatcggg actgggcgcg tgaaactgga tgggactgga ttggcaattt atacgacggc
    46381 tggcgcgatg gttgcaaaac ttggatggtt atcataatgg tcggtttata cgtgcagccg
    46441 gttgatggcg gtaaattggt tgatatatca aataacgtga aatgcccgtc atatctgggt
    46501 tatgcggcgc cgcaaatgag cagcaatggt gattcaataa ccagccacgg catattcaac
    46561 ggcggtcaat tatttgtaat ccctcgccgc acatgtctga tttataccat tgagggggct
    46621 gtaaacccgc atgttgttgc atgcagcggc gtgtctatat cgggcgggga cgtttactgt
    46681 tcatatagca tgtttaatca gttttgggat aaaaatcgcg tcgcaatgga atatgacgta
    46741 ttccaggtga tcaactctca accgcaggga ttcggtctat tcctgcaaaa cgccgccaat
    46801 tttttcgcca tatcaaatca gaacgtgata ggtcagtgca ttaaaagaat cagcgtaact
    46861 tttgctggct cttatgctct tggcgttggt tctgacgctg tagtttttgc gcactggaat
    46921 catcctgacg catcgatata tctcgatcgc gggtcgatga cgatctatgc atataacaat
    46981 aatggagagg ctgtttacac agtaacgatg gatattgtcg ttttctcaaa tcagccaccc
    47041 accccacacg atggcggcct aacgctctgg cgagaagacg gcgtttgcgt attttcgtcc
    47101 cgtctaccgc cgctggtatg gcgcggaggg tatgtcgata tcaacagcta tccgggtgca
    47161 tttgtggcgt caaacgtacc cgccgagaaa ccgatggtgc cgctatgttc tatgggcgtc
    47221 cacagtagcg ggccagtatt aaacggcaat tacgggatga tgttttatgc cgggttcaag
    47281 atggttaata accaggttgc ggcgtggcgc tctcgtcagt accgatcgtg gtatgaaggg
    47341 gctctgagcc tcaccgagcc atactatcag ataacgccga tgtccctgcc tgtcattgac
    47401 gcggcagatt atttataacc ggggaaataa tatgtccgtt ggaactatta cgctcactaa
    47461 cggctcagtt accgcaactg gggccggcac aacgttcacc tcagatttgg ttgccggtga
    47521 ttttgtcgtt gctgttgtcg gcggcgtgac atacacgctg ccggcgaaaa cggtcgattc
    47581 tgcaacgcag gtaacgctga ttcgggccta tgatggacct accgccgctg gcgcggcatg
    47641 gtccgccgtc ccacgcgacg cgatgaacgc aatcacggcc cagttggcag cagatacagc
    47701 gaaagcgatt cggggcctga actacgataa aaacaactgg cagcaagttt tcagcggaac
    47761 tggaacgatc acaataacac tgccggacgg ctcaacatat tccgggctcg cgtggaactc
    47821 attcaccagc gcgctgaata ctaaagccgc gcgcggctca aacagcgata taacgagcct
    47881 cagcggtctg actacagcgc tctcgctggt gcagggcggc actggttcaa ccaccgcatc
    47941 tggcgcccgt tctaatctcg gactaggaac agctgcgata cgaaacgtag ggaacacatc
    48001 aggcaccgtc gccgccggcg atgacggccg gttcggctcg ctggaaggga aaaccggagg
    48061 cacggtttca tccgaagtcg tcgtgaatgg gctgttgcat gccacgggtt tccgtccaac
    48121 gaacctatcc agcgaatcat ccggcaatgc ccggtcgata gggataaact ggacagatgc
    48181 tgtcggatca attgcatcaa cgctggaata ttatctcgtt gccggccagt accactcgct
    48241 gcgtatgctc attgatcagg ccagcttctc atttcgcggg aacggcaacg ctgtagcgcc
    48301 gggtggggcc tggattgacg gctcggaccg tcgcctgaaa gacaaatttg aggaaataaa
    48361 agacgcgacc agcaagacga tgatgctgac gggctacaca tacgacatga acggacagcg
    48421 cagagctggc attgtcgcgc aggacctgca gacggtattg ccggaggccg ttgagctgat
    48481 ggggccgggg ctggataagg acggcaataa tgtggatgat ttgctcggcg tgaactacag
    48541 ctcagtgacg gctctgttag tcaatgcatt caaagagcaa cagcagatga tagaggcgct
    48601 gactgcgcgg gtcgtttcgc tggagtcggc taaatcgtcg tgaaaatcag gcgctgacaa
    48661 aaagcccggc ggaatgccgg gccattcatt caatcaaatt ttcctgatat gcaatctcgt
    48721 cgagcacatc ttccagtgtc ggcagcggat cggtgtgcag tgggatagca atcccgggcc
    48781 agattttgac gtccagccag ccgccgaaat cggcgaaaac tgcatatgag agcatggggc
    48841 aaccgtccag catttcgtct tcatcgagta cgcaaaccgt cgttccgtga tagtcgataa
    48901 ttttcatttt tactcaatat aggtgttggt atttttctgt ttaatgcgga ttaaggtatt
    48961 gatattaata tatggttatt ttaaatatat accaacaaaa tgacgtaaaa cactgaaaat
    49021 aaacatattg cgtgccggtc tcgaaaaccg gagtaggggc aactctaccg ggggttcaaa
    49081 tccccctctc tccgccactt ccttcagtca ttggtttttc ccctgcctga gtatcatttt
    49141 tctttctgat agcagtatgc cgatctgtct caaaattacg tatgacatag cctaacaccc
    49201 ggttgcatga tgtttctggc tgcacggtca tgaaatcatc atttttacat tatgattatc
    49261 accgttgatg cgctgattga tgttaagcgt tttatttgag cgggtaacca ctatttctga
    49321 ctggttttta tcgctcgcta atgatttgca ttaataaccc ggcgtttttt atttctggtt
    49381 gatggcacac cagtgacagc gagaagagta gtcataaaag tcgttatgat aatggccgaa
    49441 gcgataagtt tctgaagaaa tctattttct ggttgctcca actggaagag gtttaattct
    49501 acttgttatc aatgaaggct ggttaaaatg actgaagaag atatctatcc actgctgggt
    49561 aaattggcta atggccatgt ttatgcctat gccgtgtcgt gttgtgatta tcatgcaccc
    49621 catcgtaaat atccgtttat tattttctcg ctgagccagg aaaaccatta taacgcgtca
    49681 caacaacaga ccgatcagca gattaccgtc ggtgttgatt gctatgctga taccgtcgcc
    49741 gaggctcggg cgttgcgtga acaggtcagc gcggcgttgg cggtattgaa accgaatcag
    49801 accgctgaat ataacgattt cgatgtggaa tatgagcaat tccgtatgac attggaaatg
    49861 gaactttctc gttaatcgtt taacactgta atttttaata aattcgtttc gccaataaat
    49921 aattgttggt gacggaaatc tatttttaaa ataaaggaag tatttatgtg gtataaatca
    49981 ggttcattat cacttttttc cggtagcaag gtggtgctgg gtaataatac ggcatgggcg
    50041 gataagaata atagtgtcgt tgccggtggc atgctgctga tttttgctga ttgcagcatt
    50101 aagatttatg aaattgcatc agtggtatcg gataccgaac tggtgctggc tagcgaatat
    50161 attggttgca cggaaaatgg cgtgaattac gccattccgg tgttgggcag cagtgacacg
    50221 tttgatcacg ccgcctatgt tgcgcaggtt gcggcgatgt tggccggcta ccagtcccaa
    50281 ctggctcaat ggaaacaggt gctgaccgag catggtcagg tgacgctgac ggacaacggt
    50341 ggtcagagcg tggtggtgaa aaccctgccg gacctgaccg acgccgtcag ccggatgatg
    50401 gataaaaccc tcaatggcgc tgatattccg gacaaagccc agtttgtcgc caatctggga
    50461 ctgagcgatg tggtgcgtaa gtccgacctt gctaaccata cccacaccgt ctcgcaaatt
    50521 accgacttta ccgacgcggt gcgcaaggtg ctggtggcga cgctggcggc tggccgaggt
    50581 gtttctctgg cgtatgacaa cagaaacagc caactgagca tcagcgcaac cggggcggga
    50641 agcggttcgg gccaaggtgg aagcggctat accgtggtga cgcgtatggg tacaacggcg
    50701 aaccagatat tcaccttccc gattagcctg aatggtcaga tggactatag cttcgatgct
    50761 tatgcgctga aggaggaagc ggggctaaca tcacagacgg tggttattga taccttttca
    50821 agcacaagtg ccgccaacta tgagcagaca aacaacgttg tatttgatgg gcaactgaag
    50881 ccgtacactg gtgaaaccta ttcaatgggt tccgacggtt ctttttattc ttcaattatc
    50941 aaagcggacg gcatttcatt atcagtgtcg agctactcaa cgtccacagt agtcccagca
    51001 atgacgtcag caaacacacc tgccggatat attgcctcgg cctcttcagt atacaacgca
    51061 tcatatgccg cctattacgc ctttgacggc agcgtatcag gtaatggctg gatcagcgct
    51121 agcgcgccta ctgctgctgc gccgcagtgg ttagagattg agttgccgtc tcaaactcag
    51181 atcacgggct acataataac gaacccaaac tcagtgattg gcggccttgc cagtccgaaa
    51241 tcttggttgt tgcagggtag caatgacggc agtgtttgga caaccgttca tgcggtcagc
    51301 aacagcacga ataatacggc tgacatcgat caagagttcc ctttatcggt tgccgcgaat
    51361 tattcgaaat atcgcttata tattactgat aaaaattctt cctatgcgtt tgttagtatc
    51421 aaaaaactga agctggttgt tggtgataag tgcctgattt ctgaatcctt cgggaatttc
    51481 tataccgcat catccggtgt gctaacgaaa gtaaactcgc catcctccgc gtcagaattt
    51541 tctacagttg gcttcgttta ctccggcgtt attagcagtt ccgcgctatc aggtaagctg
    51601 ccaatcaagg tttggctcgc gtcaaacccg gcaaacaatt acgttagaac atcctacggg
    51661 ccaccccctc agattattgt gccaaaatcg ttgaccagtg ttagatcctt gcaggtgatt
    51721 agctcagcac aattgtcagc aacgctgtcc ggcaaaggtg tggtatctgt agcggtgtcg
    51781 cgtgatttga atgactgggt tgtatggagt gggagttcct gggtgtctat tggttcatta
    51841 tctgcagatg caactggggc aaataagctg gtagcgagtg gtatgactgc atcgtccttg
    51901 ggccaggtca ctgcaacaca atgggctttg ctgtttccta ataccaatgg tgtgcctgat
    51961 aatctggcgt ttgctctggt gctcagtgtc cctgatccat cagtagacgg tgttgtggtc
    52021 gatgatctga ctcttaatgt gactaacggc tccgcctgga aaaaacagac tgaagccgaa
    52081 gtggaaatcc gctggtatcc cgacaaagtg acgtttaaaa ccgtggcggc gggtaactac
    52141 aagctggcct atcaacagcc ataatctctg aacgatatcc ctaagtatgc aggcggactg
    52201 aacttttcag tccgcttttt tcatctgtat taacgcatat cggcgacaaa accttacccg
    52261 ctgtcgtcag aaactgacat tcaaccgatt atgctggcgt atctgacccg attactggcc
    52321 gcaatggagg ttaccaatgg gtttctggcg tattctgttc accatcatcc tgccgccgtt
    52381 tggggttttg ctgggcaaag gtctgggctg ggcgtttttg ttgaatgtcg tgctgacgtt
    52441 gctgggttac ctgcctgggc tgatccatgc gttctggatt cagacgcgcc ccgcgcggta
    52501 ttagtcggga aggaatggcg aacaatgaaa aaatgcccgg gaaaccgggc atttgagttt
    52561 cagagggtat gacatgatta accgtgcagg cgacgggtaa tttcagccac gcgcgcgccg
    52621 tacagtttgg cggtttccag atcgcccgcc ggaattgcat cggcgccggc atcggacgga
    52681 gactgaatca gtgcgccgcc ggaaccaccg aggttgttgg cgtcgttgcg ggtggaagcc
    52741 agagcgttag ccggcagttg acccaggctg acccagatgc cgccgtgctg tgcggccagc
    52801 gtctgcagat aaatcagggt aacctgcttg tcgccgttca gactggcgct gttgacgaag
    52861 ccgccaaata ctttgtcctg ccagccgcgg gtgaaccaga ttttggagct ggcgtcggcg
    52921 aattttttga actgccaagg cgcgttgccc atataggtcg gcgcgccgaa aatgatgccg
    52981 tctgcggcgt tcagggtttc ccagtccgcg tcggtaatat cgccattatt gtcgatagcg
    53041 atcaggctgg ctttggcgct ttccgcaacc agttcagcga taagtttggt gtggccgtag
    53101 ccagaatagt agacaactgc aatcttgctc atagcatttc ctcaagtatg gccagatgaa
    53161 agcagaacgt aaaaatgata agttctgctc aggtatggcg acatattatc gcgccaaatt
    53221 tgcataaaca atgaattacc taaaagtgcc taggttactt tgcggtaacc agatggcggt
    53281 aatatgatca gggatattaa tgtaatgcag tagcgccacg ccgttttaaa atagattatg
    53341 aagaatatga ataaacgatt cggttttgca tgcctccgct gaaaaaatag gtcagtggcg
    53401 gcatgccggg gtgcttcaat gaaccagacg ttgaatacca tcgcgcgcca gcgcgtaatc
    53461 gccgcatttt tgatagaact ccagcgcttt ttgcttcatg ccgacacatt ccagaataac
    53521 gccgacatta taattggctt tataggcgtt aacgccctct ttatttcccg gcggcatctt
    53581 cgtgcactgg ataaacagat caaccgcgtt ttgaagctga ccgttattca tcagaatcaa
    53641 tgcctttaaa aatataaaat cagtggatga ataatgggat tcatagtgaa gaatatccat
    53701 ggccgttgcg taatcgccct gattgatcag cgcataaccg taggtttcga ccaggtcttc
    53761 ggtatattcg tacgtgaagt tggtttcaaa acgcaacgcc tgccggaaat agtcaatcgc
    53821 agaggagtaa tcccgtttca ggtaataact ttttcccagc tgaaacagca ggtaaggatc
    53881 gtcaggctgc atctcaagcg cctgtttcaa cagggtgatg ttccgtgcga ctttatcggt
    53941 ttcctgcagg atttcttttt tataccccac atgattcagc cgtatcgggg cgataaatgc
    54001 cgggacaggc gacgcgctga tttcccgcgg cgtaacctgt tcatgaataa tgccgctgta
    54061 gtgatagcga tctttacgaa ataaacggtt gatcgattcc cggacggtgg tggtgtcggt
    54121 tccttcatcc agataattga tgcgttccac gcggccgatt gcctgcggat gtgtttttat
    54181 cagtgcgtat agcgcatcga tatcaatgga ttcgatttct tcatcggcat cgatcaccag
    54241 cacccaatcg tggcgggcat aattcagcga tgcattgcgc gcggcggaga agtcggctac
    54301 ccattcgaaa tcatgaatat tggtggtgaa ctggctggcg atagttcggg agtcatcggt
    54361 ggagccggta tcgacaataa cgatatcgtc aaaataggcg gcgatggatg ccagcgtgcc
    54421 ggcaagatgc ctggcctcgt ttttgattat catgcagacg gaaatcat
//
