# Supplementary material for: May the Phage be With You? Prophage-Like Elements in the Genomes of Soft Rot Pectobacteriaceae: Pectobacterium spp. and Dickeya spp
Source: Front Microbiol. 2019 Feb 14;10:138. doi: 10.3389/fmicb.2019.00138 (PMC6385640; doi:10.3389/fmicb.2019.00138)
Supplement: Supplementary file 2 [file Data_Sheet_2.ZIP › Supplementary_prophagesGENBANK_files/Genbank FILES _SRP_prophages/phiDda3.gb]

LOCUS       Exported               43902 bp ds-DNA     linear   UNK 02-AUG-2018
DEFINITION  phiDda3.
ACCESSION   .
VERSION     .
KEYWORDS    .
SOURCE      phiDda3
  ORGANISM  phiDda3
REFERENCE   1  (bases 1 to 43902)
  AUTHORS   .
  TITLE     Direct Submission
  JOURNAL   Exported Aug 2, 2018 from SnapGene Viewer 4.2.3
            http://www.snapgene.com
FEATURES             Location/Qualifiers
     source          1..43902
                     /organism="prophage phiDda3"
                     /mol_type="genomic DNA"
                     /note="/genome_id=6666666.356869"
                     /note="/genome_md5="
                     /note="/project=robertczajkowski_6666666"
                     /db_xref="taxon:6666666"
     CDS             1432..1551
                     /codon_start=1
                     /product="hypothetical protein"
                     /label=hypothetical protein
                     /db_xref="SEED:fig|6666666.356869.peg.1"
                     /translation="MGGVIFMAQQIKHLELTIFSLTKKWPRLLMRSMNKNQKK"
     CDS             complement(1609..2973)
                     /codon_start=1
                     /product="Tail fiber protein"
                     /label=Tail fiber protein
                     /db_xref="SEED:fig|6666666.356869.peg.2"
                     /translation="MYRQAWRYLFHTLAWVPLSLILMRHVMSTKYTALLTQVGAARLAN
                     AIALGKQLEITQMGVGDAGGTLPTPDATQTKLINEKRRAPLNSLNVDPANANQIIAEQV
                     IPDHEGGFWLREIGLYDADDNLVAVANCPETYKPQMQEGSSRVQTVRMILAVGQTDAVS
                     LKIDPAVVLASRQYVDNMADGKLAKAQNGADITNKAQFIENLGVRNSFSGVIGMTRNAT
                     MNIPSASSSATFTADEIIVGTALGGNQYRIGLFKKTIDLTKNGVGGMDTGTVPDEGFVG
                     IYAIYNPATMASGLLTVNATSVKLPEIYNGTNMPDGYTASALLTVVPVKAGKFTVLSVF
                     GRQVHIPGVRVYSGLPNTSGVDIPVSKFIPLNTRTISGVLRQSSTGDGLVSITVSSNLS
                     PVSGQQMTNYVFANMEVSNNYADILIVDEGHIVAAASNATSGNATVIIGISKYAI"
     CDS             3018..3176
                     /codon_start=1
                     /product="hypothetical protein"
                     /label=hypothetical protein
                     /db_xref="SEED:fig|6666666.356869.peg.3"
                     /translation="MLTGQQKRASWGFAQSWHNSTKKRRHRVWTKKPAIKDGRKMGMVS
                     MARKTGY"
     CDS             3345..3542
                     /codon_start=1
                     /product="Mobile element protein"
                     /label=Mobile element protein
                     /db_xref="SEED:fig|6666666.356869.peg.4"
                     /translation="MTEWQNRPLNSLYPIVYLDCIVVKVRYSGSVINKAVLLALGISTE
                     GQKELLGMWLAEIGYVAGRK"
     CDS             3523..3891
                     /codon_start=1
                     /product="Mobile element protein"
                     /label=Mobile element protein
                     /db_xref="SEED:fig|6666666.356869.peg.5"
                     /translation="MWLAENEGAKFWLNVLTELKNRGLQDILIACVDGLKGFPDAINSV
                     YPQTHTQLCIIHMVRSSLKYVSWKDYKEVTSGLKAVYQAPTEEAALMALDTLFGYPPDI
                     RKAIYTTNAIESLNSVIR"
     CDS             3910..4029
                     /codon_start=1
                     /product="Mobile element protein"
                     /label=Mobile element protein
                     /db_xref="SEED:fig|6666666.356869.peg.6"
                     /translation="MFPTDDSVRKVVYLAIRAASKKWSMPIQNWRLAMSRFII"
     CDS             4064..4201
                     /codon_start=1
                     /product="hypothetical protein"
                     /label=hypothetical protein
                     /db_xref="SEED:fig|6666666.356869.peg.7"
                     /translation="MAVTQNYGQALKKWTMSVQNWNLTLPQLAIHFDERLNNMMALSSF
                     "
     CDS             complement(4277..5260)
                     /codon_start=1
                     /product="SAM-dependent methyltransferases"
                     /label=SAM-dependent methyltransferases
                     /db_xref="SEED:fig|6666666.356869.peg.8"
                     /translation="MDICIEEAVRQRILKMTKELRIERIVLGMDMSTPGIEISPLYNPI
                     TDKSKHNVYYTDYTSAEESRKKHADYEHDEIVDLDFIWDQKLTLSECVPAGNKFEWAIA
                     SHVLEHVPDPVGWMNEILDTLNDRGIISLVLPNADLIGDHLRKKTEVSDLIESWLYGRE
                     LPGPSQLYDFLRNTISQGSTSVASGDGRHYTKKQAIDFVIHSWTTGEYLDAHCSVFSPE
                     SFVELIEELTSLGIMNVKVVELCPAGQEFYVKLQKMGPPSLLLPQRFSPYSSMESADHQ
                     IACLTKDLQHARMAFNQAVEVQEKLKKEIENLQKGPLYFLKRILHK"
     CDS             5228..5371
                     /codon_start=1
                     /product="hypothetical protein"
                     /label=hypothetical protein
                     /db_xref="SEED:fig|6666666.356869.peg.9"
                     /translation="MPYSLFNTNIHIIYSISSTAQLAIYYSEYNINKDSEIEKKCAIVT
                     LN"
     CDS             5454..5720
                     /codon_start=1
                     /product="Mobile element protein"
                     /label=Mobile element protein
                     /db_xref="SEED:fig|6666666.356869.peg.10"
                     /translation="MRKARFTEHQIIAVLKSVEAGRTVKDVCREAGISEASYYNWKAKF
                     GGMETSDIKKMKDLEDENRRLKQMFADLSLENRALKDVIEKKL"
     CDS             5771..6277
                     /codon_start=1
                     /product="Mobile element protein"
                     /label=Mobile element protein
                     /db_xref="SEED:fig|6666666.356869.peg.11"
                     /translation="MSIHQACRTLSLSRTVYFYQPDTGRDEPVIQVLTEMAERYPRYGF
                     KKLFQVLRRQGSAWNHKRVHRIYCLLKLNFRRKGKQRLPVRSPAPLATSEALNQSWSID
                     FMHDALMCGRRFRTFNVVDDFNREALAIEIDPNIPAQRVIRILDKVVANRGYQLKMRMD
                     NGLPS"
     CDS             complement(6573..6917)
                     /codon_start=1
                     /product="Mobile element protein"
                     /label=Mobile element protein
                     /db_xref="SEED:fig|6666666.356869.peg.12"
                     /translation="MAESYLQDRADYRHLRSLPGVGPVIAMMIIAESGDLNRFAHYRQY
                     INYCGFNLSASQSGQRCSGYSLSKRGNARLRYAFWLAATVAIRMQENTLRNKYERYLNM
                     VIHLISVVRP"
     CDS             complement(7150..7359)
                     /codon_start=1
                     /product="hypothetical protein"
                     /label=hypothetical protein
                     /db_xref="SEED:fig|6666666.356869.peg.13"
                     /translation="MGQGVSSPFYDPLANEMMDIQEVSNTYYQISLARTRSLNSLVNHY
                     LTLYFPEAEQFYTSPGQNGFVSFC"
     CDS             complement(7486..7713)
                     /codon_start=1
                     /product="hypothetical protein"
                     /label=hypothetical protein
                     /db_xref="SEED:fig|6666666.356869.peg.14"
                     /translation="MIDITCCDTPVTWATIDIAKKYHDAKIKRSNGQVVYLRVENSLSG
                     YTRLINLARGAGEKRVAGFEPTADYHRNIA"
     CDS             7861..8109
                     /codon_start=1
                     /product="Mobile element protein"
                     /label=Mobile element protein
                     /db_xref="SEED:fig|6666666.356869.peg.15"
                     /translation="MLDFIKSGRPTQNAFIERFNRTYRTEILDFYLFRTLNEVREITER
                     WLHEYNSERPHESLNNLTPEEYRLIAENPEISKNVWN"
     CDS             complement(8121..8288)
                     /codon_start=1
                     /product="hypothetical protein"
                     /label=hypothetical protein
                     /db_xref="SEED:fig|6666666.356869.peg.16"
                     /translation="MSMPAVIIALDIIKHRCFHLFPTGNVLAVDTFNFSEWKNLSTQAL
                     SQQHLLALML"
     CDS             complement(8471..9826)
                     /codon_start=1
                     /product="Tail fiber protein"
                     /label=Tail fiber protein
                     /db_xref="SEED:fig|6666666.356869.peg.17"
                     /translation="MYRQAWRYLFHTLAWVPLSLILMRHVMSTKYTALLTQVGAARLAN
                     AIALGKQLEITQMGVGDAGGTLPTPDAAQTKLINEKRRAPLNSLNIDPTNANQIIAEQV
                     IPDHEGGFWLREIGLYDADDNLVAVANCPETYKPQMQEGSGRVQTVRMILAVGQTDAVS
                     LKIDPAVVLASRQYVDNMALAKAKNGEDIADKAQFIENLGVRSSFSGVIGMTRNATMNI
                     PSVSSNARFFADEIIVGTSLGGRQYRIGLFEKTIDLTKTGVGGMDTGTVPDEGFVGIYV
                     IYNPATMASGLLAVNATSVKLAEIYNGTNMPDGYTASALLTVVPVKAGKFIPLSVRERI
                     VSTPSRKIYSTLKGSVDFNIPISAIVPLNTKYLSGHARQGSTASGSLSMTISGSENGLS
                     GQQMTAYIMENGLISQNYADIVIVNDGYISIATSNATLGNATFDVYVSRYSI"
     CDS             9784..9921
                     /codon_start=1
                     /product="hypothetical protein"
                     /label=hypothetical protein
                     /db_xref="SEED:fig|6666666.356869.peg.18"
                     /translation="MQGYGTDTATPVDTRFSKRFQPVVAVEDIMLTGQQKRAQRGLEQR
                     "
     CDS             9972..10094
                     /codon_start=1
                     /product="hypothetical protein"
                     /label=hypothetical protein
                     /db_xref="SEED:fig|6666666.356869.peg.19"
                     /translation="MMISNIIGMTEISLPQKITGLKIATKPAIIIIFQTQHEER"
     CDS             10107..10595
                     /codon_start=1
                     /product="Transcriptional regulator"
                     /label=Transcriptional regulator
                     /db_xref="SEED:fig|6666666.356869.peg.20"
                     /translation="MKMNFPFLFLGLMAIIPSQASSLTTDNNEKKLEVGFGKPTYRQTL
                     HYRKLYEKKPFPDAEIFYYDNGIYKIISQGEEHYGVYVMQGNFQDQTYTIRYISLPSED
                     WGKKTAFHQLTFINGDKEKYFIQNAIVETGEAIAQQNGTFSLEENKISNPITQKWHKN"
     CDS             complement(10820..11614)
                     /codon_start=1
                     /product="hypothetical protein"
                     /label=hypothetical protein
                     /db_xref="SEED:fig|6666666.356869.peg.21"
                     /translation="MSNNNSHTNGSSATRQNTSAHQSVIENDQSLSSRSENLQSRTQEQ
                     SQAVQPNSFNINPGVVAPDSSGGATNPKLPLNDYDGPISDQHLKHSSDNHKDRRKMRWG
                     LFSVGLLASIGFLVTGAIMSYLIISNMLSTNEFIREGVNTIITNTSPEKTKEIILQLAP
                     NPPESLVHAHDAAKEVLIQTRTQQQDLLGKFLESTNWTSISPMITLVAFILGVGLTLAI
                     ALLRALFREDQAEKTNPLSDVASPLSKLIENFIDLIMSKFRK"
     CDS             complement(11683..12168)
                     /codon_start=1
                     /product="DUF955 domain-containing protein"
                     /label=DUF955 domain-containing protein
                     /db_xref="SEED:fig|6666666.356869.peg.22"
                     /translation="MEMKAVKSVLSSHWDGRLPVRPDIIAHRMGIDVNPLPVSYSGSEP
                     CGMAEITWDGRMAVYYNKSDSHSRIRFTLAHELGHHILGHTKYQAKFRDYPGTLNNTGN
                     SLDEREANRFAAELLMPEEAIDTMINNEGIHSIDALASTFDVSRDAMYWRLKNLNYV"
     CDS             12209..12382
                     /codon_start=1
                     /product="hypothetical protein"
                     /label=hypothetical protein
                     /db_xref="SEED:fig|6666666.356869.peg.23"
                     /translation="MKSVLIVKSTTKNLSSNWDKSKKHFVGLQPRTITKVHPKQQYQST
                     KNLQKCGLFSKK"
     CDS             complement(12627..12848)
                     /codon_start=1
                     /product="hypothetical protein"
                     /label=hypothetical protein
                     /db_xref="SEED:fig|6666666.356869.peg.24"
                     /translation="MARTRTSRRLSDITIRQYHQCQNLECSETFTTLNTVERRVSKRTR
                     EDPLPPDFIPQDAFPASHYGRDQLNLAL"
     CDS             complement(12912..14075)
                     /codon_start=1
                     /product="Gene D protein"
                     /label=Gene D protein
                     /db_xref="SEED:fig|6666666.356869.peg.25"
                     /translation="MRRKQGETMAITELTDTLINAAKRYDDALTEAVKSPAFSITLGGK
                     SLKELSDRLISLSLTDNRGFEADQLTLSIDDSDGRVELPPRGAQIALSIGWQGEALTYK
                     GLYTVDEISHEGPPDVLGVTARSADFREEFNVKREVSWHDVTVERVVSAIAHRYGMKAQ
                     ISDMLMNIEIDHADQTEESDMSFLTRMAEQLGAIATIKNGTLLFILPGGGVTASGKALP
                     SASLTRSSGDGHRFRIADRDAYTGVRAYWLDLKFGKKKKVSVKRRRTKPKPKKEKSSSR
                     EGDYITGAEGNVFVLRKTYQNEEVAKRAAAAKWRQLQRGAAEFSITLARGRAELYPEMH
                     LTVSGFKPDIDNQDWIIARAEHVIDGNGFTTRLELEAKIPDWIAESE"
     CDS             14074..14193
                     /codon_start=1
                     /product="hypothetical protein"
                     /label=hypothetical protein
                     /db_xref="SEED:fig|6666666.356869.peg.26"
                     /translation="MISRARVGKNGFLLSPDGQTRQRVSARRISGIIAMNSIT"
     CDS             14193..15383
                     /codon_start=1
                     /product="Major tail sheath protein"
                     /label=Major tail sheath protein
                     /db_xref="SEED:fig|6666666.356869.peg.27"
                     /translation="MVANMSETRFHGVRVRENTDLVTAINDIDSSVIGVVAVADDANAD
                     TFPLNTPVLITRVNSVLGKAGKTGSLYKTLKAIADQTSPKVIVVRVAAAVEGGEKTQSQ
                     LIIGGTAADGSYTGMYALLTAEAKVNYRPRILAVPDYDTAEVTSALCVIAQNLRAFVYA
                     GCHGCTTMAEAITYRAQFAYRELMVIWPDFIAYNPLSGSNETFPAPAYACGLRAAIDNA
                     QGWHKSLSNVAVNNVLGISRDVFWSLQAEDSDANELNNKEITTLIKRNGFRFWGNRTTD
                     THDYLFEVYTRTAQILADSIAEAQFEAVDEPLTPANVKDVVNGINGKLSALVTAGRLIG
                     GECWFDIQDNPTTGLRQGQVRVRYKYTPVPPLEDLTLYQTFTDDYFDSAFSSLGGV"
     CDS             15384..15899
                     /codon_start=1
                     /product="Major tail tube protein"
                     /label=Major tail tube protein
                     /db_xref="SEED:fig|6666666.356869.peg.28"
                     /translation="MAVPHKLRLFTCFVNGNNQIGKVTSVTLPKLTRKTEDFQGAGMIG
                     SVAVDLGMDSGALEAQMVVGGMEKKLLLEYGGDIDDVRLRFAGEYYTDGDSQLVEVEMR
                     GRITEIDGGESKQGEDTSVTYALKNTYYKLSIDDQSVLEIDLLNFIYKKNGKNIYPDRI
                     TSALGLGN"
     CDS             15947..16264
                     /codon_start=1
                     /product="probable tail protein"
                     /label=probable tail protein
                     /db_xref="SEED:fig|6666666.356869.peg.29"
                     /translation="MNTPNDNTVTLATPIARGDSTISQVAITDDIKQAGSLRGLRLVNV
                     LNMDVDSITTLLTRVTSPKLKLAEINAMDTRDFMRLAEAITPFLVHAEPGEPNAEATEE
                     A"
     CDS             16270..16428
                     /codon_start=1
                     /product="hypothetical protein"
                     /label=hypothetical protein
                     /db_xref="SEED:fig|6666666.356869.peg.30"
                     /translation="MQFDQIDDLVADIAVVFNWPPSELFSMDLGDVIAWRARAAIRSGA
                     SEADEKP"
     CDS             16415..19390
                     /codon_start=1
                     /product="Phage protein"
                     /label=Phage protein
                     /db_xref="SEED:fig|6666666.356869.peg.31"
                     /translation="MKSLDIRVAFSAIDRLTRPVNTARQSAGGLSESLKRTQAAIKDLD
                     QQSKSFNRLRDSVQKTSRKIDEASRSLDGLKKAQQSGTVLTDKQREHMASLAAKLERLN
                     ITRDQEVVKLRAASQAVRGHGVSLVGSNATIQSAIRRTEQYNQTLERERRQLAAVTQAR
                     ARYERMQQTAGKLRGSGTMAVAGGAAVGYAGGQFLAPAVGFDEEMSRVQALTRLDKGDQ
                     QLAALRAQAKKLGAETAFTTRDAASGQAFLAMAGFTPQAIQAALPGVLNMALAGGMELG
                     ETADIGSNILSQFNLDASQMDRVSDVLTGAFTRTNTDLFSLGETMKYAGPVAAKLGISL
                     EDAAAMAGMLANNGIRGSDAGTAMRASLSRLASPPKAAAAALKELGVSVADAKGKMRPM
                     QDVLRDLYKATQKYGQVDQVSFFKDIAGEEAFVGLQTLVQAAGSGALGKLSGELKKAKG
                     EADAVAKKMADNLGGDLKNLDSAWEGFRIQVEETTDKPLRSLTQGLSDVITNVSGWVKE
                     NPKLTQTLLLAGGGALALTVAIGGTSLAIGLLMGPLAKLQLGFSLLLGSRGVGGALSLF
                     SGLSSLLGGPMARMGGWLQLFSGSAGRLTTTLTPLRGMLLAVFTSPAAALGSLVRGVGG
                     LLLRLSGLPALWSLITGAVSMLGGVLSLLLSPIGLIGAAFVAAGLLIWRFWEPIKTFFS
                     GMFTGIVISLGPIRQTFTGLAPVFDVIVSAVSRLWDRFKQLFDPIQTTKKTLDDCAIAG
                     YGFGKVLGSALEMLLWPLQKLMEGIGWVLEKLGLIPSGLDAAQKKADQLKGELTPEGKN
                     RLQGLVTSLTGDLKGATTAPPPAPKPPLTGDSGTQRRLQKIADNTGGVLEETKKRIGPG
                     DIVFKNLPKALAVRGEWQESRLTGGTPSAPSQPAQTMQALSDRPAVVAATLPVKQADAS
                     PVSRPAARTPAASGFNGEIHIHLHGVERQDARELGRIVADAVSAELARRDRLQRGSFRD
                     RE"
     CDS             19403..19912
                     /codon_start=1
                     /product="Phage-related tail protein"
                     /label=Phage-related tail protein
                     /db_xref="SEED:fig|6666666.356869.peg.32"
                     /translation="MMMVYGLFVFELRTLPYQQLQQSRAWRHVKNERINRSAKWQYIGA
                     GEDQITLSGVLYPEITGGEVSLTALTTQAYSGRPWPLIDGTGQIYGMYVLTGMQTTRTE
                     LNRYGKAKKIEFSLSFQRCDEDLREKLQSSSFSDLMDTARSAATNAMKSVKDAATGAID
                     TVKGLF"
     CDS             complement(19938..20093)
                     /codon_start=1
                     /product="hypothetical protein"
                     /label=hypothetical protein
                     /db_xref="SEED:fig|6666666.356869.peg.33"
                     /translation="MIYVQFSDSSQTDVVAVFSCPQDEAAYQHQGQVPDNDARYLTFIS
                     KLEQVE"
     CDS             complement(20090..21484)
                     /codon_start=1
                     /product="Tail fiber protein"
                     /label=Tail fiber protein
                     /db_xref="SEED:fig|6666666.356869.peg.34"
                     /translation="MTTKYFALLTNTGAALLANATALGRQLSITQMALGDGGGTLPTPD
                     SAQTKLVNERRRAPLNSLGVDPANPSQIIAEQVIPEDEGGWWIREIGLYDAAGNLIAVA
                     NCPETYKPQLQEGSGRVQTVRMILIVSSTEAVTLKIDPSVVLATRAYTDGKATEAKTYT
                     DVQTNNAKIEVKAYADNLLDQLATTMTATLTEKMDKTQNGADIADVAKFLENIGLTAPR
                     FSGVVGTTRNAKMSITTASATATFTADEIIVAESLGGRQYRLSLFNASVNLAMTGAGGM
                     DTGAAPAAGFVALYAIYNPTSKAPALLAVNTTSAVSPEIYTGGNMPAGYSASALVSVWR
                     VSSSRFVVGYQSGRHINIMRSAALSSTTQHADLIPLSLAGLVPPNAHSVNGDGYTTTSD
                     GSTVAVNFAIASSATGINRYSATQFGSLSMPFSSVAIIDAQTVYYTATIVSGALTMAIN
                     VSGYEI"
     CDS             complement(21481..22089)
                     /codon_start=1
                     /product="Tail protein I"
                     /label=Tail protein I
                     /db_xref="SEED:fig|6666666.356869.peg.35"
                     /translation="MSNSLLPPSASDFMRNVASSTQLLSGIAVDLDTLWDAERCPVGLL
                     PYLAWALSVDRWDKRWSEQTKRQVIKAAWLVHRQKGTIAALRRVVEPFGYLIRITEWWQ
                     TGGTPGTFRLDIGVQDAGITEETYLELERLIADAKPVSRHLLGLNIVMDCAGNIPLAAG
                     QYSGDALTVYPYFPETITTGGADIHAAAIHLSDNVSVNA"
     CDS             complement(22082..22978)
                     /codon_start=1
                     /product="Phage baseplate assembly protein J"
                     /label=Phage baseplate assembly protein J
                     /db_xref="SEED:fig|6666666.356869.peg.36"
                     /translation="MATVDLSQLPQPQIIEVLDFEVILQDVKAVMIAAFPAAQQASVTA
                     ALALESEPLTAIAQVIAYREMMLRQRINEGAEACLLSYAVSSDLDNLAANLNTKRLTIT
                     EATDTADAVMESDSALRLRAQAAFEGLSVAGPTGAYEYFAKSASGKAADAKAISPSPAV
                     VVVSVLSTEGDGSASADLLAAVDAALSADDKRPVGDRLTVQSAEIVRYAITAVLYRYPG
                     PESEPIQQAAQQALTSWLSAQGRIGRDVARSAIMAALHVQGVQRVELLEPAQDIVISDT
                     QAAYCTGFTITEGGSDE"
     CDS             complement(22965..23333)
                     /codon_start=1
                     /product="Phage baseplate assembly protein"
                     /label=Phage baseplate assembly protein
                     /db_xref="SEED:fig|6666666.356869.peg.37"
                     /translation="MTATYTGMNPYGTGTLTDADQLWQSVRDILTTPLASRVMRRDYGS
                     LIPDLLDAPQNAVTRLQLMSAAVIALTRWEPRISLNAVDIRYSASGAVDVALSGLITET
                     MQAANAAITLRGDSDGNG"
     CDS             complement(23330..23911)
                     /codon_start=1
                     /product="Phage baseplate assembly protein V"
                     /label=Phage baseplate assembly protein V
                     /db_xref="SEED:fig|6666666.356869.peg.38"
                     /translation="MSAELMRLLENLLRVGVVTAVDPATWRVRVKSGELLTDWLRWNTT
                     RAGAFNVWFPPAVGEQVLLGCLGGNPETAVIIGSLFSEAHPAPGNSLKEIVITAPDGAR
                     FRYDAVAGSLEATGMKTVNVVASVSVTLNTPVVECTQHLKARTVEITHGGTLAGNVAHS
                     GGAMTSNGVQVDNHRHGGIQPGGSWTSGTQ"
     CDS             complement(23908..24546)
                     /codon_start=1
                     /product="Phage tail completion protein"
                     /label=Phage tail completion protein
                     /db_xref="SEED:fig|6666666.356869.peg.39"
                     /translation="MTDKLFHALDKVFDDILSGLSPAGRLKTARQVGQALRRSQQQRIR
                     AQKNPDGSAYATRRRKVLRSQKGMVFVWEGQVRHLKNWHGGRGKYGRTITGFDEDRNAI
                     RTFYRSDIERYIEINTQAVRRTTSKTTPMFQRLRGYRFLKMRADTDGASVGFDGIAGRI
                     ARVHQYGERDKVGSGAFARYPVRELLGISLADERLIQDAVINSLGSAAT"
     CDS             complement(24543..25001)
                     /codon_start=1
                     /product="Phage tail protein # FIG072132 and FIG003673"
                     /label=Phage tail protein # FIG072132 and FIG003673
                     /db_xref="SEED:fig|6666666.356869.peg.40"
                     /translation="MLKTNSLRTALTASNTWCRANPEAFTVFVEEGGIETTGETPSFLY
                     RYSLVLFVMNFTGDIDDFTLPLMAWLWQNQPDLLLNPQKNREVKFTTLINNDDSADILF
                     EIPVRERVKVTRDDNGILRAEHLPEPRPRLTGGVWDAVLDDATGEAAA"
     CDS             complement(25012..25146)
                     /codon_start=1
                     /product="hypothetical protein"
                     /label=hypothetical protein
                     /db_xref="SEED:fig|6666666.356869.peg.41"
                     /translation="MTWGAVALWSDQLLDALDTCNADKAAINDLYLRRLQRLKDAATP"
     CDS             complement(25115..25552)
                     /codon_start=1
                     /product="hypothetical protein"
                     /label=hypothetical protein
                     /db_xref="SEED:fig|6666666.356869.peg.42"
                     /translation="MKLTVTLAVLLVLAVSGVLWQTYQRGIDRAHTEALTDSARQQREL
                     LTEVRALADDARNVLAQVREREQQRYAEGEERRENLREVMQSDTCANTVVPAAVSDSLQ
                     KRAAVAQRADTARPGAAQPDGADTDARTENAGDLGRGRALE"
     CDS             complement(25549..26094)
                     /codon_start=1
                     /product="Phage lysin (EC 3.2.1.17) # Phage lysozyme or 
                     muramidase (EC 3.2.1.17)"
                     /EC_number="3.2.1.17"
                     /label=Phage lysin
                     /db_xref="SEED:fig|6666666.356869.peg.43"
                     /translation="MKTAIKRCSIALIVALGVTLSPGTLRTSPEAQQKTASWEDCRQSP
                     YYCPAGVLTVGIGSTGNVQNRAYSNDEIARRWVNDMQRAENCVNGNFNGAAMPQSAFDA
                     MTDTAFNLGCSGLMWFTNRQGSKQRTTIWKHAQAHEWPAMCERLTDFVNSGGQRSTGLV
                     NRRSDFKAWCLRDLAGVP"
     CDS             complement(26078..26380)
                     /codon_start=1
                     /product="hypothetical protein"
                     /label=hypothetical protein
                     /db_xref="SEED:fig|6666666.356869.peg.44"
                     /translation="MGLNDLQRLNDGVTYGLSVMVTGIGVMTVSEKVALAGLVIGVVTA
                     WRAWLFRRRIERAQRRRNELIEQILQQSERRTLNASERRAVAILHQGDVDDENRD"
     CDS             complement(26371..26571)
                     /codon_start=1
                     /product="Phage protein"
                     /label=Phage protein
                     /db_xref="SEED:fig|6666666.356869.peg.45"
                     /translation="MVVRALQGDTVDLLCYRHYGTSAGVTEQVIAANPGLSRQMFLTAG
                     QAITLPDIPRQTEQETVQLWD"
     CDS             complement(26571..27062)
                     /codon_start=1
                     /product="Phage head completion-stabilization protein"
                     /label=Phage head completion-stabilization protein
                     /db_xref="SEED:fig|6666666.356869.peg.46"
                     /translation="MSLVASKRVSDGGDVPEIDDGAAAVSAGEFWPVIVLRDLRLAARI
                     TGGITTTRLMHVTTEAVVHVTDQLASWQQTQQAAGYAALADVPAGQVNGESIKVYRFKR
                     AVYAIARALLLEGYRDVDTTAKGDKATDTFDSQRDDLWRDARWSIADIRGAQRLFAELC
                     "
     CDS             complement(27161..28042)
                     /codon_start=1
                     /product="Phage terminase, endonuclease subunit"
                     /label=Phage terminase, endonuclease subunit
                     /db_xref="SEED:fig|6666666.356869.peg.47"
                     /translation="MLTPAQRHFQRVMAERRGQADTETAVSRTAHEQILHRLRLHQAAL
                     KQVQSDATKAEMKKAMLPEYDGWIDGTLEGDSGRQDEVIVTLMVWAIDCQDNALTLRLG
                     RYVVKHGLSLPADKFRRDAVTVLAEEVSNPVLTLATTDADADLSGYTAVLDEVAAIVDG
                     KDMPDEVRAKLCKARAFSRRAAVDAQTKAEALKLFREAMARNPNAGVKREIATLTRELK
                     KLMPGSSNEPEDGAPGDDETTTETPAGETPPAASADAAQPAVKKAAVRNTTARKTTRTT
                     GKSKAARQSAKR"
     CDS             complement(28086..29141)
                     /codon_start=1
                     /product="Phage major capsid protein #Fam0066"
                     /label=Phage major capsid protein #Fam0066
                     /db_xref="SEED:fig|6666666.356869.peg.48"
                     /translation="MENSTRNLYNQYISRQAQLNGVQPNDVAMTFSVEPAAQQRMEQAA
                     QESDEFLKQINVFGVKAQEGQKILIGSKGPIASTNNSSDGTSRRNPTDNHSKESNTYHC
                     RKVNYDSAISYPQLDAWATQPNFQALISQANAQQIGLDRIMIGFNGTTYAETSNRSANP
                     LLQDCGVGWLQKTRNDAAHRIIKNVTLTARDEDNKIIAKGTYGNLDTAVFDAKNSLLDP
                     WHRKAPDLVVIMASDLLTSSNFPRLNALSQSNPNTELLAGQLIVSQERVGGLPTFLAPY
                     FPSNAVLITSFKNLSVYYQLGALRRSIAEEPQYNRIATYQSSNDDFVVEDYGKVALIDG
                     IQFAQAAGDGQ"
     CDS             complement(29167..30042)
                     /codon_start=1
                     /product="Phage capsid scaffolding protein # Fam Scf032"
                     /label=Phage capsid scaffolding protein # Fam Scf032
                     /db_xref="SEED:fig|6666666.356869.peg.49"
                     /translation="MASQTPQDRTTGMSGTAKPTRKKFRVAVSGSTVDGREIGRDHLYA
                     MAESYNPQVYGARVNVEHILSPYPGSDFSAMGDVVALSAEDITDGPLKGRAALYAEIEP
                     TERMKQLTGEGKKIYSSIEIDPQFAATGRPYLRGLAMTDTPASLGTERLKFAAQQRAQV
                     QAFNNLPGEPVMFTEAMEAELVELSEQRSDEGKQWFSRVMGIIGKGRKSDGEQFSQVRE
                     AVENVAQSHADLLDNFNALKNQQQQDSRTIQTLTSELAALTQKLATQDNSYSQRPPASG
                     GNSGAQLADF"
     CDS             30041..30256
                     /codon_start=1
                     /product="hypothetical protein"
                     /label=hypothetical protein
                     /db_xref="SEED:fig|6666666.356869.peg.50"
                     /translation="MIAEPNSLSQRGFVVGGGPEPKVSERRIARGVIFPAKGETAHDSG
                     RICTAASKTALLAGLPASGNFAPDGD"
     CDS             30246..31892
                     /codon_start=1
                     /product="Terminase, ATPase subunit"
                     /label=Terminase, ATPase subunit
                     /db_xref="SEED:fig|6666666.356869.peg.51"
                     /translation="MGINQNTVYAWKKRDEWDETPPIQRVTHSIDARLCQLAQKPTKTG
                     GDLKEMDALTRQLKTLNDGQPGNAAGGKKPRQRKVKNHFTDEQIAALREKILDSLSWHQ
                     RGWYEQRHHRNRMILKSRQIGATWYFAREALLDALRDDVKYPYQRNQIFLSASRRQAHQ
                     FRGFIQKVAEEVDVELKGGDKIVLSNGAELHFLGTSAATAQSYTGNLKFDEFFWVSNFT
                     NLRKVAGAMATLKGLTRTYFSTPSSETHEAYPFWTGARWNEKRSKAQKVAFDVSWKALN
                     SGLLCPDKTWRQIVTLQDVIDHGWEYTDLEEIQDENSGDDFLNLYMCEFVRDGESAFNL
                     NALIACGADGYDEWPDWKPFASRPMADRGVWIGYDANGSSGNGDSGAISVVVPPLVAGG
                     KFRTIETQQIRGLEFEEQAKVIEALTFKYNVQHIAIDGTGIGEAVYQIVKKFFPAAVCF
                     LMSVSSKRALVLKMLQVIRAGRWEYDRSERALINAFNAVRRVKTPGGIMTYDTDRARGS
                     NHGDLAWATMLAVINEPLGQEQGGGGFAMEF"
     CDS             31892..32944
                     /codon_start=1
                     /product="Presumed portal vertex protein"
                     /label=Presumed portal vertex protein
                     /db_xref="SEED:fig|6666666.356869.peg.52"
                     /translation="MKRKDKTGTHRAVTASQPDMAAALKSDPGLSAFTFDGPYPVRDGH
                     DLLDNMYCADNGRYYDTPVDWYGLARAFGSASWHQSALYFKRNALTGCFIPHPLLSRQA
                     FSAFVLDWFVFGNGYLERRVNRLGGVLSLRHVPAKYTRRGSDLNTYWFIRQWKDEHTFD
                     TDSVCHVINPDIHQEIYGMPEYMGALLSASLSHSADMFRKLYYDNGSHAGCIIYIGASQ
                     VDTESMDNVKKTLKEARGKGAFKNLLLHAPGGGEKGVQIIPFSQISAKDEFLNIKSVTR
                     DDILAAHRVPPQLMGAMPEGNGSFGDVEKAARVFAINELMPVMEALKHVNDWLGMEVIR
                     FNPYALLKAE"
     CDS             complement(33433..34074)
                     /codon_start=1
                     /product="hypothetical protein"
                     /label=hypothetical protein
                     /db_xref="SEED:fig|6666666.356869.peg.53"
                     /translation="MIVLSDNDVILKLAQCNLLSQLSTILNEQPDQIFINPAARYQLLP
                     DNPDKAIRKCGSQQIYEQLGAFIESVNDVPEIMNLSLLELLGDVPNIDVGEQFLLASCI
                     ENPDAIFMTGDRRCLSAIISNKATLATIHQRLIDAVVTFESSLLLCVHGSTVAHVHSQL
                     MGNPKPDVVLRMALANSGSAMCECLFSYTRDFYEYLAFKDRLPDREWGLQ"
     CDS             complement(34078..35076)
                     /codon_start=1
                     /product="Predicted Zn peptidase"
                     /label=Predicted Zn peptidase
                     /db_xref="SEED:fig|6666666.356869.peg.54"
                     /translation="MNDTNHMRSIYNKFQSAGFNLSYIRSLLPEWWDERLADTPSGRQY
                     ASLHLARMFSILPESLKDESEGICFNFGGNHKFKHRNNVADDDLDIATAIAYTAAKIVA
                     SNFKKPYDPQIVLDPELIRKDTMESNPWVSLGNLVEYCHSVGIPVIYLKKFPRGAKKMA
                     GLALMSCGRPVIILTQPQKYGYMLFDLAHELGHIAKGHLNAENGQCHVDEKIESASTSD
                     IEKEANEFAFQVLSGQKSLRIVPTGRFLKAPQLANAAKKFGSERGVDPTHIALNYGFVM
                     GHWGVAVNAVKAICNGHPTDQNFIKDMMKKGIDLESINEDDLNILENLIGE"
     CDS             complement(35510..37564)
                     /codon_start=1
                     /product="Putative replication protein"
                     /label=Putative replication protein
                     /db_xref="SEED:fig|6666666.356869.peg.55"
                     /translation="MIDLHVPEHNGAYHAVREWQREQFSPGEPAGLSFVERSLWHLNKV
                     DHYWRQQYLAGMPDYLAKYFGQRYEKLFKSDEHTGRRRANTFLLRTLGKSVLPRLRTVT
                     ERYQTQQRAAGDLPFPFCDDLEKMPVYDRDNIRALSQQVADFMAASLRDYTENRIRNTG
                     NLTDRYITLLSFRHLGLLTLQAGTQPPYWAQFTKGRRPLSTEKAESGLLRMMSPEWWRA
                     RLKRRRDIQREHMAIAVGQVQKAASPYVSRSTLDEWKEQKRRNREFFKAFDLEDEEGNR
                     VSLDDMVNASNANPAIRRCELMVRMRGFEDLAQEMGCAGEFYTITAPSRYHAVHSGGGF
                     VEQWSGASPRDTQKYLCGVWARIRAELSREEISVFGFRVVEPHHDGTPHWHLLLFMRPE
                     HIEQVRDIMAYHARREDSGELNSEKAQKARFHYEPIDPEKGSATGYIAKYISKNIDGYA
                     LDGEADEETGENLRDMAKAVSAWASRWRIRQFQQIGGAPVTVYRELRRLGDKQLDNAAM
                     DAVLAAADVGDWAAYTQAQGGPLVSRDELVVRLSYEVTERANQYAEDVQKVQGVYSPLL
                     GERSAIITRTVEWKIVPKQAAASAGAGVSGGPAAAWSSVNNCTSGLRRRLSELLRLRGF
                     PPDPGLVDVLIRGCNLAISEGRALKMVNGRLEEVGQTGDCELWPGWNWE"
     CDS             complement(37561..37848)
                     /codon_start=1
                     /product="Phage protein"
                     /label=Phage protein
                     /db_xref="SEED:fig|6666666.356869.peg.56"
                     /translation="MSILQLAVMGEYFAAMKAGMKPFEYRLDNAYWRRRLIGRDYEQLV
                     ITWGYPARSDMSRRLILPWLGYEMQTITHPHFGDKPVNVFAIRIGAGVCE"
     CDS             complement(37845..38759)
                     /codon_start=1
                     /product="Modification methylase ScrFIA (EC 2.1.1.37)"
                     /EC_number="2.1.1.37"
                     /label=Modification methylase ScrFIA
                     /db_xref="SEED:fig|6666666.356869.peg.57"
                     /translation="MRAIDLFAGFGGSSTGARMAGAHVVWAANHWPAAVEYHRLNHPDA
                     IHVCQDLHQADWSSVPAHDLMMASPCCQGHSRARGKTAGDPQHDASRSTAWAVVSAAEY
                     HKPSAVIVENVPEFLNWALYPAWAAAMAALGYALSPHVVDCADLGVPQNRVRLFLICTR
                     SRSPLSLDLPRLSHVPATTFIDFDDGRWSQINRPGRAISTLARIENGRRQFGERFIFSY
                     YGNTKSGRSIDRPIGTITTRDRWAVVDGDRMRMVTKREVLAAMSFSSSYITPDSHRLTV
                     NMAGNAVPPVAMCRVVEAIGGCL"
     CDS             complement(38759..39595)
                     /codon_start=1
                     /product="Methyl-directed repair DNA adenine methylase (EC 
                     2.1.1.72)"
                     /EC_number="2.1.1.72"
                     /label=Methyl-directed repair DNA adenine methylase
                     /db_xref="SEED:fig|6666666.356869.peg.58"
                     /db_xref="GO:0009007"
                     /translation="MSTIATPLKWVGSKARVMHILREHLPAGDRLVEPFAGSCAVMMNT
                     DYPEYLIADINPDLINLYQVIKEDVKDFIDTAEGLFRTANTAESYYRFRQVFNRSKENR
                     TTSAALFLYLNRHGYRGVCRYNRAGGFNVPYGHYASPYFPLAEIQAFAEKARRAKFICA
                     AFGETLQLIHPGDVVYCDPPYIPQTPTASFTSYHTDGFTHNDQYDLCSALSRLAERGIP
                     VIASNSDTHHAHSLYHRFDICRFTAPRSVGVAAGESKQAGEIIAKRLPVHGQRGAA"
     CDS             complement(39592..39816)
                     /codon_start=1
                     /product="Phage protein"
                     /label=Phage protein
                     /db_xref="SEED:fig|6666666.356869.peg.59"
                     /translation="MDSMDIAQERETFIRETQIQKARQQSGYAVSASVCESCDAPPPEA
                     RRVAVPGVRLCVYCQGDAELKNKHYRGAL"
     CDS             complement(39816..40046)
                     /codon_start=1
                     /product="hypothetical protein"
                     /label=hypothetical protein
                     /db_xref="SEED:fig|6666666.356869.peg.60"
                     /translation="MKNAEVKTMTVAADGALVELLKKARLEERKDQHFSFSLRLAALAV
                     RAQQRDLSAAEVVELIRQESERFEHSAQGLS"
     CDS             complement(40118..40396)
                     /codon_start=1
                     /product="hypothetical protein"
                     /label=hypothetical protein
                     /db_xref="SEED:fig|6666666.356869.peg.61"
                     /translation="MFKGESRAQSFWERAALETREIILFSAKPKLKSRHVNYSWHQFTA
                     EERAAIWGAIKRIRSICDETALFGPDDFLKTSNQNGTPNKPSQSPIH"
     CDS             complement(40460..40615)
                     /codon_start=1
                     /product="hypothetical protein"
                     /label=hypothetical protein
                     /db_xref="SEED:fig|6666666.356869.peg.62"
                     /translation="MQKPISIAPFLWQQQTESRIKPEIRHGEGKQGIIIRPDGRRWNPP
                     KGAFNR"
     CDS             complement(40729..40935)
                     /codon_start=1
                     /product="hypothetical protein"
                     /label=hypothetical protein
                     /db_xref="SEED:fig|6666666.356869.peg.63"
                     /translation="MVKKEFAVIRLSKHTSIYRGFSVVEYPRTITNSIKRYRVSREGQS
                     YGLFDALALATGYIDSLHNSVYQ"
     CDS             complement(40946..41221)
                     /codon_start=1
                     /product="Cox"
                     /label=Cox
                     /db_xref="SEED:fig|6666666.356869.peg.64"
                     /translation="MMSERVYEVRYPVDAVPYQKFAELIGKSEAAVKGMVDNGKLPLIP
                     WVNPENPNPRRGENWVYIPEFNRAMRDAFMNRPKEQRDAWLLWLGL"
     CDS             41473..41937
                     /codon_start=1
                     /product="hypothetical protein"
                     /label=hypothetical protein
                     /db_xref="SEED:fig|6666666.356869.peg.65"
                     /translation="MNEQQIHNIRFELAYSYQLEKITEVFNRRIDKLLCLIQFFLGSAV
                     VTEHGSGLLLGILIAIISALLFTLKPGEITGGAKQQAQKYRILLDDLDTSDIEIIKQKK
                     YVIEQTDSPHPYSLCGPAYHRAAVMLGLPANSKLTPMEKLFSFFCGGIPR"
     CDS             42071..42298
                     /codon_start=1
                     /product="hypothetical protein"
                     /label=hypothetical protein
                     /db_xref="SEED:fig|6666666.356869.peg.66"
                     /translation="MTKKRTVIPTYKVRCNTFDNLIEIEFSVPDDQIVAIRLNANQSRE
                     LIAQLNHHLDESMICSFVYPTKKNVLALRV"
     CDS             42559..42852
                     /codon_start=1
                     /product="C protein"
                     /label=C protein
                     /db_xref="SEED:fig|6666666.356869.peg.67"
                     /translation="MDIAQKIKLIRKAEGLTQIKFCEISGIALSTLKNYEGGHREPGLQ
                     VVLQITNTKQFQKYTLWLMTDKTAPEAGQIAPALAHIGPDETKSHQSNQNIG"
     CDS             42919..43902
                     /codon_start=1
                     /product="Phage integrase"
                     /label=Phage integrase
                     /db_xref="SEED:fig|6666666.356869.peg.68"
                     /translation="MAVKKLDDGRYEVDIRPIGRNGKRIRRRFEKKTEAVAFERYTLSR
                     ADKKEWQHGYGVEHRQLSELVELWWLYYGQNLKNGLIEKRHLKRTAAQMDDPEICRINK
                     RSILEFRTRRLYDGISSSTVNRDIYRLSGMFSALIKLEIYTGENPLKELPPLPEKQPTV
                     TFLTESEIARLLDTMEDDQYRLAVLCLSTGARWGEASTLRAEQVMHNRVTFTETKNGKN
                     RTIPISEEVTRIIKTRETGKLFKVDYSAFCEQIKAVKPDIPKGQASHILRHTFASHFVM
                     NGGNLVALQQILGHASIQQTMTYAHLAPDYLQNAITLNPLRGKIAV"
ORIGIN
        1 aaattgataa gagatatcag aagaaaattc gacagaacca ccattacgga caaaagcacc
       61 ataccctttt aacatttcct tggtactatt gctttgccca tagacagtca caccagtgta
      121 attccaccca acggaattat tttctgtaat gactactgag aaaaaattat tgggatatac
      181 aatagggaat gtttgattaa taacacctgc tgctaacgtt tttccaacac cccattgaat
      241 aataatacca gatggcaaca cctgataacc attcaatcct gcaccagcaa tccctactcc
      301 acctatcgct ctccattgcg gcccagtgga aagaaatttt acatttacgc cactttgaat
      361 tttcaacatc ttcgaaccag atggattatt cggtccgaga atatctacac tcgcgccaga
      421 aacagtaact gcgccattgg aaatattatt aaactcaatg actccgccag gacaaagtga
      481 tgcatcaggc aacgtaatcg tgataccggc tatttgcgac tcgatgaaac agccaaaggc
      541 atcactggta agtaccttat tttccctgac gccaaacgct gatttcatat ttcccaacgc
      601 acgttgtaca aacgcggtgg tggcgatact ggtgtcggca tcaaagaaag gcggtgtcgg
      661 cgcagtgggg ttaccaacaa ataccgggct atcaatcggc gcatattgtt tgtgcggatc
      721 ggccgcagca atatgctccg ctaacaagtt gtcagtatac gatttaactt cgatcacgtt
      781 cgtgtcggta tacgctagcg aggataatgt cttgtcatcg acatattgcc ggcttgccag
      841 cgccaccgtt gggtcaaacg tcatcatcac cgcatcagta tggctcacaa tcagaatcat
      901 gcgtaccgtc tgtacccgac cggagccttc cttcaattcc ggcttatagg tttccgggca
      961 attaccgact gcaatcagat caccatccac atcatacagg ccgatttcgc gtaaccaaaa
     1021 cccaccttca ttttccggga tcacctgttc ggcaataatc tggttggtgt tgttgggatc
     1081 aatcgtcagt gaattgatgg caccacgccg tttctcatta accagtttgg tctgtgtcgc
     1141 atccggcgtc ggcagagtac cgccgccatc tcccaccccc atttgggcaa tttgcagtgg
     1201 ttttccggtc aagatcgatg ctgccagttt gacctcgccg acccgggtaa gcaatgtaac
     1261 gtatttaata cccatatttg ctctctgcag gattatttat aaaggaaaag gtcatataac
     1321 accggtatga aatgcttatg aaagaaaatg gatcgtcata attttcaagt aattcatgcc
     1381 cattgttatc gttaaaaaca ttatgctgct cgcttaatga aataattcga tatgggaggt
     1441 gtgatattta tggcacaaca gataaaacac ttagaattaa caatattttc tcttacaaaa
     1501 aaatggcctc gattattaat gagatcaatg aataaaaacc aaaaaaaata atattaaaaa
     1561 acaggataat acagtaaaaa tctcataaac tcatcatcaa ccagaatttc atatagcata
     1621 tttagatatg ccaataataa ccgtcgcatt tcctgatgtt gcgttactcg cagcagccac
     1681 aatatgtccc tcatcaacaa tcagaatatc agcataatta tttgacacct ccatatttgc
     1741 aaacacataa tttgtcatct gctgaccaga aacaggactc agattactag atactgttat
     1801 ggatacaagg ccatctcccg tactactctg ccgtaatacc ccactaatag ttcttgtatt
     1861 caatggaatg aatttactaa cgggaatatc aacacctgat gtatttggta atccagaata
     1921 gactcgtact ccaggaatat gcacttgcct tccaaagaca gataatacgg taaacttacc
     1981 cgccttgacc ggcacaaccg tcaataatgc cgatgctgta tatccatccg gcatattggt
     2041 tccgttatag atttccggca atttaactga ggtggcgtta accgtgagca agcctgacgc
     2101 catcgtcgcc ggattataaa tggcataaat cccgacaaac ccctcatcag ggaccgttcc
     2161 ggtatccatt cccccaacgc cattttttgt cagatcgatc gtcttcttga ataaaccaat
     2221 ccgatattgg tttcccccca gagcagttcc aacaattatc tcatcggcag taaatgtggc
     2281 gctggaagaa gcggagggaa tattcatcgt ggcatttcgc gtcatgccaa ttacaccgga
     2341 gaatgagttc ctcacaccca aattctctat aaactgagct ttattcgtaa tatccgcacc
     2401 attttgagct ttagccagtt ttccgtcagc catgttatct acatactgcc ggctagccag
     2461 caccaccgcc gggtcgattt tcagcgatac cgcatcagtc tggccgaccg ccagaatcat
     2521 gcgtaccgtc tgcacgcggc tggagccttc ctgcatctgc ggtttatagg tttcggggca
     2581 gttggccacc gccaccagat tgtcatcggc gtcatacaaa ccgatttcac gcagccagaa
     2641 tccaccttcg tgatccggaa tcacctgctc ggcaataatc tgattggcgt tggccgggtc
     2701 gacgttcagt gaattgagcg gcgcgcgtcg tttttcgtta atcagtttgg tctgtgtcgc
     2761 atccggcgtc ggcagcgtgc caccagcgtc tcccaccccc atttgggtaa tttccagctg
     2821 ttttcccagc gcaatcgcat tcgccagcct ggctgcaccc acctgggtaa gcagagcggt
     2881 atattttgtg ctcataacgt gtctcatcag aattagcgac aaagggaccc atgcaagggt
     2941 atggaacaga taccgccacg cctgtcgata cacgcttttc caagcgattt cagcccgttg
     3001 tggcagtgga ggacattatg ctgacgggcc agcaaaaacg cgcgtcgtgg gggttcgcac
     3061 agtcatggca caacagtact aagaaaaggc ggcacagagt atggacaaaa aaacccgcca
     3121 tcaaagatgg gcgaaagatg gggatggtgt ctatggcaag gaaaacaggt tactgatcct
     3181 acccacctaa tgtggacacg gccctaagcg gggtcagtcc agattttatc tctgtatgcc
     3241 aaaggcatga ccacgcggga aatcgttgcc accttcaaag agatgtatga tgcagatgtt
     3301 tccccacgct gatatccaaa gtaactgatg cggttaaaga acaggtgaca gaatggcaaa
     3361 atcggccact gaactcgctg tatccgattg tttatcttga ttgtatcgtg gtaaaagttc
     3421 gttacagcgg cagcgtaatc aacaaagccg tgctcctcgc attgggcatc agtacagaag
     3481 gccagaaaga gttattgggt atgtggctgg ccgaaattgg gtatgtggct ggccgaaaat
     3541 gaaggcgcga agttctggct caatgtactg acggagctga aaaaccgggg gcttcaggac
     3601 atcctgattg cctgcgtgga cggtctgaag ggcttcccgg atgcgataaa cagcgtttat
     3661 cctcaaacac atacccagct ctgcatcatc cacatggtgc gtagcagcct gaaatacgtg
     3721 tcgtggaagg attacaaaga ggtcaccagc gggttgaagg cggtgtatca ggcccccaca
     3781 gaggaggcgg cgctgatggc actggacacg ctctttggct acccgcccga catccgtaag
     3841 gcgatatata ccaccaacgc aatagaatca ttgaacagcg ttatccgcta ggcaataaag
     3901 aaacgcagcg tgttcccaac ggacgactcg gtgcgcaagg ttgtttatct ggcgatacgg
     3961 gcggcgtcga aaaaatggag tatgccgatc caaaactggc ggctggcgat gagccgtttt
     4021 attatctagt tcggtgaccg cctgagcgat cacctttaat accgtggcag ttacacagaa
     4081 ttacggacaa gctcttaaaa aatggacaat gtccgtccag aactggaatt tgacattacc
     4141 ccagctagcc attcattttg acgagcggct gaataatatg atggcgctgt cgtcttttta
     4201 acgtgacaca gaattctgaa cgctttctca attagagaaa tagaattttt tgaggcggca
     4261 tacgccgcca actttactat ttatgaagta tacgcttaag aaaatagagt ggcccttttt
     4321 gcaaattctc tatttccttt ttaagttttt cctgtacttc aacggcttga ttaaatgcca
     4381 tccttgcatg ctgaaggtct ttagtaagac aggcgatctg gtgatctgcg gactccattg
     4441 aactataagg agaaaagcgt tggggtagca atagcgaagg gggccccatt ttttgtagtt
     4501 tcacataaaa ctcctgacct gccggacaaa gctcaacaac tttaacattc attatgccaa
     4561 gtgacgttaa ctcttcaatg agctcaacaa agctttccgg actgaacaca gagcaatgtg
     4621 cgtcaaggta ttcgccagtt gtccatgagt ggattacaaa gtcaattgct tgttttttcg
     4681 tatagtgcct gccgtcacct gaagcgacag acgtacttcc ttgagatatt gtgtttctaa
     4741 gaaagtcgta tagttgagat ggtccgggta attccctacc ataaagccat gactctatca
     4801 aatccgaaac ttctgttttt tttcttaaat gatctccaat taaatctgca ttaggaagta
     4861 cgagagaaat aattcctcga tcattcagtg tgtctaaaat ctcattcatc catccaacag
     4921 ggtcagggac atgctctaag acatgtgacg caattgccca ttcaaattta ttcccagcag
     4981 gaacacactc agaaagtgtt aatttctgat cccatatgaa atcgagatct acgatttcat
     5041 cgtgttcata gtcagcatgc tttttacgtg attcttcagc agatgtataa tcggtataat
     5101 atacgttatg ttttgattta tccgttattg gattataaag aggagaaatc tcaatacctg
     5161 gagtgctcat atccatacca agtactattc tctcaattct cagctcttta gtcatcttga
     5221 gaattctttg ccttacagcc tcttcaatac aaatatccat atcatctact ctattagttc
     5281 aacagcacag cttgcaattt attactctga atataacatt aataaagact cagaaataga
     5341 gaaaaaatgt gccatagtga cactgaactg atctgtaagc atcccgccaa accggaccat
     5401 tcacttttag agatctcccg acatactgat tatgtccctg agacgagctc gtcatgcgta
     5461 aagcccgatt caccgaacac cagatcatcg ccgttctcaa gtccgtcgaa gccggacgca
     5521 cagtcaaaga tgtctgccgg gaagcgggga tatccgaggc ctcgtactat aactggaaag
     5581 caaagtttgg cggtatggaa acctctgata tcaaaaagat gaaggatctt gaggacgaaa
     5641 atcgtcgcct caaacaaatg tttgccgatc tgagtctgga gaaccgggcg ttaaaagacg
     5701 ttatcgaaaa aaagctttaa aaccagcgat aaagcgtgag ctcgtcggtt acctgacaac
     5761 acaattttcg atgagcatcc accaggcatg caggacattg tcgctgagca ggacggtcta
     5821 tttttatcag ccggatacgg gcagggatga accggtgatc caggtactga ctgaaatggc
     5881 ggaacgctat ccgcgatacg gttttaagaa actgtttcag gtgcttcgca ggcagggcag
     5941 cgcctggaat cacaagcgtg ttcaccggat ttattgcctg ctgaaactga attttcgtcg
     6001 taagggaaag cagcgtctgc cggtgcgtag cccggcacca ctggctacgt cggaagcgct
     6061 caaccagagc tggtccatcg atttcatgca cgatgcgctg atgtgtggca gacgattccg
     6121 gactttcaat gtggtggatg actttaaccg cgaagcactg gccattgaaa tcgacccgaa
     6181 tatcccggca caacgggtta tccgtatact ggacaaggtc gtggcaaatc gcggctatca
     6241 gctgaagatg cggatggata acggactacc ttcttaatca atctgattta caaaaaaagg
     6301 tctgccagag cacatgccgg tttctgattg tgatattgct gtccgccgct ggccaggcgt
     6361 gcttaccatg atatacaagg gtccatatgg cccgacagga cttaacaaag catcaggaaa
     6421 agccatgggc attgagcatt atctggtggt cgcgatgcgc cttacgaccc gtttgaatca
     6481 cgtcccatgg cttatatcga aatacctctg ataatctaca tttcttttca ctacagaatg
     6541 cgctattcgt gcaagttttg ctgcaacagc cgttatggcc ttacgacgct gatcaggtgt
     6601 atcaccatgt taagatagcg ctcatatttg ttcctgaggg tgttttcctg cattctgatg
     6661 gcgactgtag cagcgagcca gaatgcatat ctcagccgtg catttccacg ttttgacagg
     6721 ctataaccac tacacctttg tccactctga ctggctgaaa ggttaaatcc gcagtaatta
     6781 atatactgac ggtaatgagc aaaacggttc agatcgccgc tttcagcaat gatcatcatt
     6841 gcaatcaccg ggcctacgcc gggtagcgag cgcagatggc ggtaatcagc gcgatcctgc
     6901 agatagcttt cagccatttt ttctaactgg agtcgttgaa gagtcagttc aacgtaccgc
     6961 cggatttgta gcttaaacgt ggtaacagcc aggcaatttt ccgtcagcgg cagggctaca
     7021 gaattcccgg caatgttata taactgttca agaaactgtt gtttgtatgt ttgcggccaa
     7081 taatgtccca ggcttcctca aaaaactggt gtttttccat tgaggtgatt gtcagtggtg
     7141 tggggaatct cagcagaaac tgacaaaacc attctgtccg ggactggtgt aaaactgttc
     7201 agcttcagga aaatataacg tcagataatg atttaccagg ctgttgaggc tgcgggttct
     7261 tgcaagggaa atctgataat aggtatttga tacctcctga atatccatca tttcattagc
     7321 caggggatca taaaaaggtg atgaaacccc ttgccccata agatagagaa tgacacaggt
     7381 atctttccgg tcatttttat cccaggtttt gaaaagtatt tcgcgcgccc tggcgcaggc
     7441 cagcgaggaa acaagatggc actcgacgcc ctgctcctga agccactagg caatattacg
     7501 gtgataatcg gcggtcggtt cgaaaccggc aaccctcttt tccccggctc cacgggcaag
     7561 attgattaac cgggtatacc cggagagtga gttttcgacg cgcagataaa caacctgacc
     7621 gtttgagcgt ttaatctttg catcgtgata ttttttagca atatcaatag tagcccatgt
     7681 taccggggta tcgcagcagg taatgtcaat catgatattt ctccagacgt tgcactcatt
     7741 cctggtgtag aaaatttatg acatgctgac cagtagctca tcagtcaggt attacacagg
     7801 taccacgacc ccgagctggt gtctctgacg ctggcgcagt gggcggagga gcatggtgtg
     7861 atgctggact ttattaagtc tggcaggccg acacaaaatg ccttcatcga gcggttcaac
     7921 cggacatacc ggacagaaat cctggatttt tatctgttca gaacactgaa tgaagtcagg
     7981 gaaatcacag agcgctggct gcacgaatac aacagcgaac ggcctcatga atccctgaat
     8041 aacctgacgc cggaagaata ccggctgata gctgaaaacc cggaaatctc aaaaaatgtg
     8101 tggaactaaa acgggtgagc ttacagcatg agtgccaaaa gatgttgttg tgataatgcc
     8161 tgcgtggaaa gatttttcca ttcgctgaaa ttgaatgtat ccacggcaag cacattgcca
     8221 gtcgggaaaa gatgaaaaca acggtgttta attatatcga gtgcgattat aaccgctggc
     8281 atcgacatag tgcttgcggc ggcctcaacc cggaacaatt tgaaaaccag aacctcgctt
     8341 agggctgtat ccactttacg tgggtaaaat cacgggtata ttctctaaaa aatggtctca
     8401 gttattaatg agaccaatat gtaatttaaa aatcaagtgg atttttatga aaaatcgttc
     8461 caatcatata ttatatcgag tatctagaaa cataaacgtc aaatgttgca tttcctaacg
     8521 ttgcattact tgtggcgata gaaatatagc catcattaac gattacaata tcagcataat
     8581 tctgcgagat aagtccattt tccataatat aggctgtcat ctgctgccca gataaaccat
     8641 tttcactacc agaaattgtc atcgataatg acccagaagc agtgctacct tgtcgagcat
     8701 gtccacttaa atatttagta tttaatggaa caatagcact aataggaata ttaaaatcta
     8761 ctgagccttt taaagtagaa tatattttcc ttgatggtgt agatacgatc cgctctcgaa
     8821 cagataatgg aataaactta cccgccttga ccggcacaac cgtcaataat gccgatgctg
     8881 tatatccatc cggcatattg gttccgttat agatctccgc caacttgacc gaagtggcgt
     8941 taaccgcgag caagcctgac gccatcgtcg ccggattata aatgacataa atcccgacaa
     9001 aaccctcatc agggaccgtt ccggtatcca tccccccaac gccagttttt gtcagatcga
     9061 tcgtcttttc gaataaacca attcgatact ggcgtcctcc caaagacgtt ccaacaatga
     9121 tttcatcggc aaaaaatctg gcattagaag aaacggaggg aatattcatc gtggcatttc
     9181 gcgtcatgcc aattacaccg gagaatgagc tcctcacgcc caaattctct ataaactgcg
     9241 ctttatccgc aatatcctcg ccatttttag ctttagccag ggccatgtta tccacatact
     9301 gccggctagc cagcaccacc gccgggtcga ttttcagcga caccgcatca gtctgaccga
     9361 ccgccagaat catgcgtacc gtctgcacgc ggccggagcc ttcctgcatc tgcggtttat
     9421 aggtttcggg gcagttggcc accgccacca gattgtcatc ggcgtcatac aaaccgattt
     9481 cacgcagcca gaatccacct tcgtgatccg gaatcacctg ctcggcaata atctgattgg
     9541 cgttggtcgg gtcgatgttc agtgaattga gcggcgcgcg tcgtttttcg ttaatcagtt
     9601 tggtctgtgc cgcatccggc gtcggcagcg tgccaccagc gtctcccacc cccatttggg
     9661 taatttccag ctgttttccc agcgcaatcg cattcgccag cctggctgcc cccacctggg
     9721 taagcagagc ggtatatttt gtgctcataa cgtgtctcat cagaattagc gataaaggga
     9781 cccatgcaag ggtatggaac agataccgcc acgcctgtcg atacacgctt ttccaagcga
     9841 tttcagcccg ttgtggcagt ggaggacatt atgctgacgg gccagcaaaa acgcgcgcag
     9901 cgagggttgg aacagcgata gcacaacaaa ccccgttcag ttttttataa ctatggagat
     9961 ctggaaagtg aatgatgatt agtaacatca ttggtatgac agaaatatca ctcccccaga
    10021 aaataaccgg gctgaaaata gcaactaagc cagcgattat tattattttt cagacacaac
    10081 atgaagaaag gtgaaggaga taagacatga aaatgaattt tccatttctc ttcctggggc
    10141 ttatggcaat aatccccagt caggcaagct cattaacaac ggataataat gaaaaaaaac
    10201 ttgaggttgg ctttggtaaa ccgacctaca ggcaaacact gcactaccgt aaactctatg
    10261 agaaaaaacc gttccccgat gcagaaatat tctattacga caacggtatt tataaaataa
    10321 tatcgcaagg tgaagagcat tatggcgttt acgtcatgca gggaaatttt caggatcaaa
    10381 cctataccat cagatatatc tcattgcctt cagaagactg ggggaaaaag actgcatttc
    10441 atcaactcac attcattaat ggcgacaaag aaaagtattt tatacaaaat gcgatcgttg
    10501 aaacgggaga ggcaatagcg caacagaatg ggaccttttc cctggaagag aacaaaatca
    10561 gtaatcccat cacacaaaaa tggcataaaa attaggatat ccgccatcct gcagaaaacg
    10621 gatggcttac gatcagggca ggatagtcac acaatcctat agctcgcccc aaaaaaaagc
    10681 cctccatcaa ggagggcgaa agacagggat ggtgtacaaa taattacacc atccacatga
    10741 aataaaagga tttatttctt acaatgtcca catatcgacc acatcgatac gatgcccacc
    10801 attggtgggc ataacatatt cacttcctaa atttgctcat aattaaatca ataaaatttt
    10861 ctatcaattt actgagaggt gatgcaacat ctgaaagtgg atttgttttt tctgcttgat
    10921 cttcgcgaaa taatgctctc agtaaagcga tagcaagtgt taggccaaca cctaaaataa
    10981 atgccaccag tgttatcatc gggctaatag aagtccagtt agtcgattcc aagaatttac
    11041 ccaatagatc ttgttgttgt gtccttgttt gtatcaacac ctctttcgca gcatcatgcg
    11101 catgaacaag gctttcaggt ggattaggag ccaattggag aataatttct tttgtttttt
    11161 ctggtgatgt attagtaatt attgtattaa ctccttccct aataaattca ttagttgaaa
    11221 gcatatttga aatgattagg taagacatta tcgcaccagt caccaaaaaa ccaatgctcg
    11281 ctaacaagcc gacactgaac aatccccagc gcatttttcg tctgtcttta tgattatcag
    11341 aagagtgctt gagatgttga tcagagatcg gtccatcgta gtcatttaga ggcaattttg
    11401 gattcgttgc accaccagaa gaatctggag ctactacacc agggtttata ttaaaagaat
    11461 tgggctgtac tgcttgagac tgttcttgtg ttcggctctg tagattttca cttctggaag
    11521 ataatgactg atcattttca attacagact gatgtgcaga tgtgttttga cgtgtagcag
    11581 aggaaccatt agtatgggaa ttattgtttg acataataag ccacccaaag attagaagtg
    11641 gctttatatt aatgaatcag tattgatact tacaattcaa acttaaacat aatttaagtt
    11701 ttttagccgc caatacattg cgtctctaga tacgtcaaac gtgctagcaa gcgcgtcaat
    11761 tgaatgaata ccttcattat taatcatagt atcaatagct tcttctggca ttagcagttc
    11821 agcagcaaaa cgattagcct ctcgctcgtc aagagaatta ccggtgttgt tcaacgttcc
    11881 aggataatcg cggaatttag cctgatattt tgtatggccc agtatgtgat gccctaattc
    11941 atgagcaagc gtgaacctta ttcgagaatg agaatcactc ttgttatagt agactgccat
    12001 cctaccatcc catgttatct cagccatacc acatggctcc gagcctgagt agcttacagg
    12061 caaaggattt acatctattc ccatacgatg ggcaatgata tcgggtctga caggcagacg
    12121 accatcccaa tgggaactaa gtacagactt aactgccttc atttccattt ttcaagtctc
    12181 caagctgaaa caccgttgat ccgagtcaat gaaatctgtt ctcatagtta aatctactac
    12241 aaaaaattta tccagtaact gggataaatc aaaaaaacat tttgttggtt tacaaccacg
    12301 cacgatcact aaagtacatc caaaacagca gtatcaatcc accaaaaacc tgcaaaaatg
    12361 cgggcttttc tccaaaaaat aaaaagccgc cttgaatatc acatttaaaa tgctaaatcc
    12421 agtcgatttt agagaagata agtatgagat aagggattga atggggcaca tactccaacg
    12481 agtagtttgg cactacgcaa tgtcaggaaa aattaaagaa aaaacaaatc attacattaa
    12541 atggtgtatg aggctaattc tctgtgccac ttttaccagt ttcctgttgt ttcaaagccc
    12601 cgcactcatc ctgcggggct ttggttttac aacgccagat tcaactgatc tcgcccgtaa
    12661 tgcgaagccg gaaaggcgtc ttgcgggata aagtcaggcg gtaacgggtc ttcccgcgta
    12721 cgctttgaca cgcgccgttc taccgtgttg agggtggtaa acgtctcgct gcattccagg
    12781 ttctgacact ggtgatactg ccggatggtg atatcgctca ggcggcgact ggtacgggtg
    12841 cgggccattg ctccgcagaa aggacatctg aacataatgg ctcccctgtg ggagttgaac
    12901 tcgctgccat tttattcact ttccgctatc cagtcaggga tttttgcttc cagttccaga
    12961 cgggtggtaa agccgttgcc atcaataacg tgttccgccc gggcgataat ccagtcctga
    13021 ttgtcgatat ccggtttaaa gccgcttact gtcaggtgca tttcgggata cagctcagca
    13081 cggccacgcg ccagggtgat cgagaactcg gcggcgccgc gttgcaactg gcgccattta
    13141 gccgcggcgg cccgtttggc gacctcttca ttctgatagg ttttgcgcag cacgaacacg
    13201 ttaccttccg cgccggtgat gtaatcgcct tcacggctgc tgctcttttc ctttttcggt
    13261 ttgggctttg tccggcggcg ctttacgctg accttcttct ttttaccgaa tttcagatcc
    13321 agccagtagg cgcgcacacc ggtgtaggca tcccgatccg cgatgcgaaa acggtgacca
    13381 tcaccactac tacgggtgag gctggccgac ggcagcgcct tgccggatgc cgtcacacca
    13441 ccgccgggca ggataaacag caaggtgccg tttttaatgg tggcaatcgc ccccaattgc
    13501 tcggccatac gggtcaggaa tgacatatca ctctcttcgg tctggtcggc gtggtcgatt
    13561 tcgatattca tcagcatgtc gctgatttgc gccttcatcc cgtaacggtg cgcgattgcc
    13621 gacaccacgc gctctacagt cacgtcatgc caggagactt cccgtttcac gttgaactct
    13681 tcgcggaaat ccgcacttct ggccgtcacg cccagtacat cgggcgggcc ttcgtgggaa
    13741 atctcatcca cggtatacag ccctttgtaa gtcagcgcct caccctgcca gccgatggat
    13801 agcgcaatct gggcgccgcg gggtggcagt tccacccgtc cgtcactgtc gtctatcgac
    13861 agcgtgagct ggtcggcctc aaagccccgg ttgtcggtca gcgacagcga gatcagccgg
    13921 tcgctcagct ccttcagtga tttcccaccc agcgtaatgc tgaaagccgg gctttttacc
    13981 gcctcggtca gcgcgtcatc gtagcgtttc gcagcattga taagtgtgtc agtcagttcg
    14041 gtgatagcca tcgtttcccc ctgttttcgc cgcatgattt cacgcgcacg cgtggggaaa
    14101 aatggctttt tgttgtcgcc ggacggccag acccgtcagc gcgtgagtgc gcgacggata
    14161 tcggggatta tcgccatgaa ctcaataacg taatggtggc gaacatgtcc gagacacgtt
    14221 tccacggtgt gcgtgttcgt gaaaataccg acctggtaac cgcaatcaat gacattgatt
    14281 ccagtgtgat tggcgtggtg gccgtggcgg atgatgcgaa tgcagacacc tttcccctga
    14341 atacgccggt gctcatcaca cgggtgaata gcgtgctggg caaggcgggt aaaaccggct
    14401 cgctctacaa gacgctgaaa gcgattgctg accagaccag cccaaaagtg atcgtagtgc
    14461 gggtagcggc agcagtcgaa ggcggcgaaa aaacccagtc ccaactgatc atcggcggga
    14521 cggcggcaga cggcagttat accggcatgt atgccttgct gacggcagag gcgaaggtca
    14581 attaccggcc gcgcattctg gcggtaccgg actatgacac cgccgaagtg acgtcagcgc
    14641 tgtgtgttat tgcgcaaaat ctgcgggcgt ttgtctacgc cggttgtcac ggctgcacca
    14701 cgatggcgga ggccatcacc taccgtgcgc aatttgctta tcgtgagctg atggtgatct
    14761 ggccggattt catcgcctat aacccactct ccggcagcaa tgaaaccttc ccggcgccgg
    14821 cgtatgcctg cggccttcgt gcggcgattg ataacgctca gggctggcat aagtcgctgt
    14881 cgaacgtggc ggtaaataac gtactgggca tctcgcgtga tgtgttctgg tcgcttcagg
    14941 ccgaagacag cgacgccaat gaactcaaca ataaagagat caccacgctg attaagcgca
    15001 acgggttccg gttctggggc aaccgcacca ccgacaccca tgattacctg tttgaggtgt
    15061 acacccgtac cgcgcaaatc ctcgccgaca gtatcgcgga agcgcagttt gaagccgttg
    15121 acgaaccgct taccccggcc aacgtgaaag acgtggtgaa cggcatcaac ggcaagctga
    15181 gcgcgctggt gaccgcaggc aggctgatcg gcggggaatg ctggttcgat attcaggaca
    15241 accccacaac cggcctacga cagggacagg tgcgcgtgcg ttacaagtac acgccggtac
    15301 cgccgctgga agacctgacc ttataccaga ccttcaccga tgactatttt gattccgcgt
    15361 tctcgtcgct gggaggtgtg taaatggccg taccgcataa attgcgcctg ttcacctgct
    15421 ttgtgaacgg caacaaccag atcggcaagg tcacctccgt cacgctgcca aagttgaccc
    15481 gcaaaacgga agactttcag ggcgccggca tgattggctc ggtggcggtc gatctcggca
    15541 tggactccgg cgcgctggaa gcgcagatgg tcgtcggcgg catggagaaa aagctgttgc
    15601 tggaatacgg cggcgatatc gatgacgttc gcctgcgctt tgcgggggaa tactacaccg
    15661 acggcgacag ccagcttgtt gaggtggaaa tgcgcggacg tattaccgag attgacggcg
    15721 gcgagtctaa gcagggcgaa gacacatccg tcacctatgc gctgaaaaac acctattaca
    15781 agctgtcgat tgacgatcaa tcggtgctgg aaattgacct gctgaatttc atctacaaga
    15841 aaaacggcaa aaacatctac ccggatcgca tcacctccgc gctcggactc ggtaactgaa
    15901 caatcttaac aatggcggcc acaccagccg cccggagcct gtgaccatga acacaccgaa
    15961 cgacaacacc gttaccctgg caacacccat cgcgcgtggc gacagcacca tcagccaggt
    16021 ggcaatcacc gacgacatca aacaggctgg ctcgctgcgc ggcctgcggc tggtcaacgt
    16081 cctgaatatg gacgtggatt ccatcaccac cctgttaacg cgcgtcacct cgccaaaatt
    16141 gaagctggcc gagatcaacg cgatggatac ccgcgatttc atgcggctgg cggaggccat
    16201 cacgcctttt ttagtacatg cggagcctgg cgagccgaac gcggaggcga cggaggaagc
    16261 ataaccgtct tgcagttcga ccagatagac gatctggtcg ccgatatcgc cgttgttttt
    16321 aactggccgc cctctgaact gttcagcatg gatctgggcg acgtgatagc ctggcgcgcg
    16381 cgggcggcta tccgaagtgg agccagtgaa gccgatgaaa agccttgata tccgcgtagc
    16441 cttcagcgct atcgaccgcc tgacccgccc ggtcaacacc gcccgccaga gtgcgggcgg
    16501 tttatctgaa tccctcaaac gtacccaggc cgccatcaag gatctggatc aacagtccaa
    16561 gtccttcaat cgcctgcgcg acagcgtaca aaagacctct cgcaagattg atgaagccag
    16621 ccgtagcctg gacgggctga aaaaggccca gcaaagcggc acggtgctga ctgacaagca
    16681 acgggagcac atggcctcac tggccgccaa actggagcgg ttgaacatca cccgcgatca
    16741 ggaagtggtc aagctgcgcg ctgcctcgca ggcggtacgc ggtcatggcg tgtcgctggt
    16801 cggcagtaat gccaccatcc agagcgccat ccggcgcacc gaacaatata accagacact
    16861 ggagcgagag cggcggcaac tggctgccgt cacgcaggcc cgcgcccgct atgagcggat
    16921 gcagcagacg gcgggcaagc tgcgcggcag cggcacaatg gcggtggcgg gcggggcggc
    16981 agtcggatac gcgggtgggc aatttctggc cccggcggtc gggtttgatg aagagatgtc
    17041 gcgcgttcag gcgctgactc gactggataa aggcgatcag caactggcgg ccctgcgggc
    17101 gcaggccaaa aagctcggcg cggaaaccgc attcaccacc cgcgatgcgg ccagcgggca
    17161 ggcgtttctg gcgatggccg gctttacgcc tcaagctatt caggcggcac tgccgggcgt
    17221 gctgaatatg gcgctggccg gtggcatgga gctgggcgaa accgccgata tcggctcaaa
    17281 tatcctgtcg cagttcaatc tggatgcgag ccagatggat agggtcagcg atgtgctgac
    17341 cggtgcgttt acccgcacca acaccgacct gttcagcctc ggcgaaacca tgaaatacgc
    17401 cgggccggtg gcggccaagc tggggatcag tctggaagat gcggccgcga tggccggcat
    17461 gctggcgaat aacggtattc gcggcagtga tgccggtacc gccatgcgtg ccagcctttc
    17521 gcggctggcc tcgccgccga aagccgcagc ggcggcgtta aaagagctgg gcgtgtcggt
    17581 ggccgatgcc aaaggcaaga tgcggccaat gcaggacgtg ttacgcgatc tgtacaaggc
    17641 gacccaaaaa tacggccagg tcgatcaggt gtccttcttc aaggatatcg ccggggagga
    17701 agcctttgtc ggcctgcaaa cactggtaca ggcggccggt agcggcgcgc tgggaaaact
    17761 gtctggggag ttgaaaaaag ccaagggtga agcggacgcc gttgctaaaa agatggcgga
    17821 caacctgggc ggcgacctga aaaacctcga cagcgcctgg gaaggcttcc gtattcaggt
    17881 tgaagagacg acagataagc cgctgcgtag cctgacgcag ggattaagtg atgtgatcac
    17941 caacgtgagc ggttgggtga aagaaaaccc caaactgacg cagacgctgt tactggccgg
    18001 cggcggtgcg ctggcactca cggtggcaat cggcggcacc tcgctggcaa ttggcctgtt
    18061 gatggggccg ctggctaagc tccagctcgg cttttcactg ctgctgggtt cgcggggcgt
    18121 cggtggcgcg ctgtcgctgt tttcggggtt aagtagcctg ctcggcgggc cgatggcacg
    18181 catgggcggc tggctacagc ttttttccgg cagcgcgggc cgactgacga cgacactgac
    18241 cccgctgcgc ggcatgttgc tggccgtgtt cacctcgccg gcggcggcgt taggttcact
    18301 ggtcaggggc gttggcggat tgttgttgcg gctaagcggc ttgcctgcgc tatggagcct
    18361 gatcaccggc gccgtctcga tgttaggcgg cgtgctgtca ttgctgttaa gcccgatcgg
    18421 gttgattggt gcggcgtttg tggcggcagg gctgcttatc tggcgcttct gggagcctat
    18481 caaaacgttt ttcagcggga tgtttaccgg cattgttatc agtcttggcc cgattcgtca
    18541 gacatttacc ggcctggccc ccgtctttga tgtgattgtg tcggccgtgt cgcgcctgtg
    18601 ggatcggttt aagcaactct ttgacccgat ccagaccaca aagaagacgc tggatgactg
    18661 cgcgatcgcg ggctatggat tcggtaaggt gctggggtca gcattggaaa tgctgttatg
    18721 gccgctgcaa aagctgatgg aggggattgg ctgggttctg gaaaagctcg gcctgatccc
    18781 gtcgggactg gatgcggctc agaaaaaagc cgaccagttg aagggcgaac tgacgccgga
    18841 aggaaaaaac cggcttcagg gtctggtcac cagcctgact ggcgatttga agggggccac
    18901 cactgcgcct ccacccgcgc ccaagccgcc cctgaccggg gacagcggca cccagcgccg
    18961 tttgcagaag attgccgaca acaccggcgg cgtgctggaa gaaaccaaaa agcgcatcgg
    19021 ccccggcgat atcgtattca aaaatctgcc gaaagcgctg gccgtgcgtg gcgagtggca
    19081 ggaatcccgg ctcactggcg gcacaccttc tgccccctca cagcctgcgc agaccatgca
    19141 ggcgctcagc gaccgccccg ccgtggtcgc ggcaacgctg cccgtcaaac aggccgatgc
    19201 gtccccggtc agtcgcccgg cggccagaac accggcggcg agtggtttca acggggaaat
    19261 ccatatacac ctgcacggtg ttgaacggca ggacgcccga gagctgggcc gtattgtggc
    19321 cgatgcggtc agtgccgaac tggcccgccg cgacagactt cagcgtggca gtttcagaga
    19381 cagagagtaa ggagaaaaac cgatgatgat ggtgtatggg ctgtttgtgt ttgagctgcg
    19441 taccttgcct tatcaacagc ttcagcagtc gcgtgcctgg cggcatgtaa agaatgagcg
    19501 gattaaccgt tccgcaaaat ggcaatacat tggcgccggg gaagatcaga tcacgctgag
    19561 cggcgtgctg taccctgaaa ttaccggtgg tgaagtgtcg ttaaccgcgc taaccacgca
    19621 agcctacagc ggccgcccct ggccgttgat tgacggcacc gggcagattt acggcatgta
    19681 cgtgttgaca ggtatgcaga ccacgcgcac agaactgaat cgctacggga aggcaaagaa
    19741 gattgagttt tcgctgagct ttcagcgctg tgatgaagac ctgcgggaga agctgcaatc
    19801 atcatccttt agcgacctga tggacactgc gcgcagtgcg gcaaccaacg cgatgaagag
    19861 tgttaaggat gcagcgacgg gcgctatcga tacggtgaaa gggctgtttt aacggcccga
    19921 cagggccgtg ttatctgtta ctcgacctgc tccagcttag agataaatgt cagatagcgt
    19981 gcgtcattgt ctggtacctg cccctgatgt tggtaagccg cttcatcctg cgggcaactg
    20041 aatacagcaa caacgtcagt ttgcgatgaa tcagaaaatt gaacgtaaat catatctcgt
    20101 acccactcac gtttatggcc atcgtcaacg ccccggaaac gatggttgcg gtgtaataaa
    20161 ccgtttgggc gtcaataatg gcgacggatg aaaaaggcat cgacagtgaa ccaaattgcg
    20221 tcgccgaata ccggttaata cctgttgccg atgatgcgat cgcgaaattc acggctaccg
    20281 tcgagccatc gctcgttgtc gtgtagccgt cgccattcac cgaatgggca tttggcggca
    20341 ccaacccggc cagagagagg gggatcaagt cagcatgctg cgttgtgctg ctgagcgcgg
    20401 cgctgcgcat aatattgata tggcgccctg actgatagcc caccacaaat cgtgatgatg
    20461 atactcgcca gacactgacc agtgctgatg cgctatagcc ggccggcatg ttgccgccag
    20521 tgtaaatttc aggtgatacc gcgctggtgg tattcactgc cagcagtgcc ggtgccttgc
    20581 tggttgggtt gtagatggcg taaagcgcca caaagcccgc cgccggtgcc gctcctgtgt
    20641 ccataccgcc agcgccggtc attgccagat tgacgctggc gttaaacaaa ctgaggcgat
    20701 attgccgccc gcccagcgac tcggccacaa tgatttcatc tgcggtaaag gtcgctgtcg
    20761 cggatgccgt tgtaatgctc attttggcgt tacgggttgt gccaaccaca ccgctaaacc
    20821 gtggcgctgt caggccgatg ttttccagaa attttgccac gtcggcaata tccgcgccgt
    20881 tctgcgtttt atccattttt tcggtcagcg ttgccgtcat cgtcgtcgcg agctgatcca
    20941 gcaggttatc ggcgtaagct ttcacttcaa ttttggcgtt gttcgtctga acatcggtgt
    21001 aggttttcgc ttcggtggcc ttaccgtcgg tatatgcacg cgtcgccagc actaccgacg
    21061 gatcgatttt cagcgttacc gcttcggtac tactgacaat caaaatcatg cgcaccgtct
    21121 gcacccggcc agagccttcc tgtaattgcg gcttgtaggt ttccgggcag ttggcgacgg
    21181 caatcaggtt acccgccgca tcatacagac cgatttcacg tatccaccag ccgccctcgt
    21241 cctctgggat cacctgttcg gcaataatct gactcgggtt cgccgggtca acgcccaggg
    21301 aattgagcgg cgcccggcgc cgttcgttca ccagtttcgt ttgtgccgag tctggggtcg
    21361 gcagtgtgcc gccgccatcg cccagcgcca tttgtgtaat cgacagttgc cgccccagcg
    21421 cagtagcgtt cgccagcagc gccgcgccgg tatttgtcag caaggcaaaa tattttgttg
    21481 tcatgcgttc acgctcacat tgtcagacag atgtatcgcc gctgcgtgta tatccgcacc
    21541 gccggtggta atcgtttcgg gaaaataggg gtaaacggtc agcgcatcgc cgctgtattg
    21601 cccggcggcc agcgggatat tacccgcgca gtccatgacg atatttagcc ccagcaagtg
    21661 gcgacttacc ggtttggcgt cagcgatcag ccgctcaagc tccagatagg tttcttcggt
    21721 gatgccagca tcctgcacgc cgatatccag ccggaaggtg ccgggcgtgc cgccagtctg
    21781 ccaccactcg gtaatgcgaa tcagatagcc gaacggctcc accacccggc gcaatgccgc
    21841 gatagtgccc ttctgacggt gtaccagcca ggccgccttg atcacctggc gtttggtctg
    21901 ttctgaccag cgcttatccc agcggtcaac cgacagcgcc caggcaaggt acggcaataa
    21961 cccgacgggg cagcgctcag cgtcccataa cgtatccaga tcgaccgcta tcccactcag
    22021 gagctgggtg gagctggcga cgttgcgcat aaagtcgctg gctgacgggg gcagcaggct
    22081 gttactcatc gctgccgccc tcggtgatcg tgaacccggt gcagtacgcc gcctgcgtgt
    22141 cgctgatcac gatgtcttgc gccggttcca gcagttcaac gcgttgcacc ccttgcacat
    22201 gcagcgccgc cataatggcc gagcgagcca catcgcgccc gatgcgcccc tgtgcgctga
    22261 gccatgatgt taatgcctgc tgtgcggcct gctggatcgg ctccgattcc ggccccggat
    22321 agcggtacaa caccgccgta atggcataac gcactatctc ggcgctttgt accgtcaggc
    22381 ggtcgccaac cgggcgttta tcatcggcag acagcgcggc atcgaccgcc gccagcaggt
    22441 cagccgaggc gctgccgtct ccctcggtgg ataacaccga caccaccact accgccgggg
    22501 acgggctgat cgctttggca tccgctgcct tgccgctggc acttttggca aaatactcat
    22561 acgcgccggt cggcccggcc acgctcagtc cctcaaaagc cgcctgcgcc cgcaagcgta
    22621 gcgcgctgtc gctttccatc acggcatcgg cggtgtcggt cgcttcggtg atagtcaatc
    22681 gtttggtgtt caggttggcg gccagattat ccagatcgga tgacacggcg tagctgagca
    22741 ggcaggcttc cgcgccttcg ttaatccgct ggcgtaacat catttcccgg taggcgatca
    22801 cctgcgcgat cgcggtgagt ggctcggact ccagcgctag cgcggcggtc acggacgcct
    22861 gctgagcggc cggaaaggcg gcaatcatca ccgctttcac gtcctgaagg atgacttcga
    22921 agtccagcac ttcaatgatc tgcggctggg gtaactgcga taaatcaacc gttgccatca
    22981 ctgtcacccc tgagcgtgat ggcagcgttg gccgcctgca tcgtttcggt aatcaacccc
    23041 gataacgcca cgtctaccgc tcccgatgct gaataacgaa tatcgacggc attcagcgag
    23101 atacgcggct cccagcgcgt cagggcgata acggccgcac tcatcaactg aagccgcgta
    23161 acggcattct gcggcgcatc cagcaagtcg gggatcaggc tgccgtaatc ccggcgcatc
    23221 acccgcgagg ccagcggcgt agtcagaatg tcacgcaccg actgccagag ctgatcggca
    23281 tcggtcaggg tgccggtgcc atacggattc atgccggtat aggtcgcggt cattgtgtac
    23341 cactcgtcca gctaccgccg ggctgaatgc cgccgtggcg atggttatcc acctggacgc
    23401 cgttagaggt catcgcgccg ccagaatgtg ccacattacc ggccagggtg ccgccgtggg
    23461 tgatctccac ggtgcgggcc ttcaggtgct gagtgcattc caccaccggc gtattcagtg
    23521 tgacgctgac cgaggccacc acgttgacgg ttttcatgcc ggttgcttcc agcgaacccg
    23581 ctacggcgtc ataccgaaac cgggcaccgt ccggcgcggt gatcacaatt tccttcaggc
    23641 tgttgccggg tgccgggtgg gcttcactga acaggctacc gataatcacg gcggtttccg
    23701 gattaccgcc aaggcaaccc agcaacacct gttctccgac ggcaggcggg aaccagacgt
    23761 taaacgcccc ggcgcgcgtg gtgttccagc gtagccagtc ggtgagcaat tcaccgctct
    23821 taacacgtac ccgccaggtt gccgggtcaa ccgccgtgac gacgccgacg cgcaacaggt
    23881 tttccagtaa tcgcatcagt tcagcgctca tgtggcggca ctccccagac tgttgatcac
    23941 cgcgtcctgg atcagacgct catcagccag ggagatcccc agcagttcac gcaccgggta
    24001 gcgggcaaag gcgcccgacc cgaccttgtc acgctcgccg tactgatgca cgcgggcgat
    24061 acgaccggcg atgccgtcaa atcctacgct ggcaccgtcg gtatcggccc gcattttgag
    24121 aaaacgataa ccgcgcaggc gctgaaacat cggggttgtc ttgctggtcg tgcggcgcac
    24181 cgcctgcgtg ttgatctcga tataacgctc aatatcgctg cggtaaaacg tgcggatggc
    24241 gttgcggtct tcatcaaagc cggtgatcgt gcggccgtat tttccccggc cgccgtgcca
    24301 gttcttcagg tggcgcacct ggccttccca gacaaagacc attccttttt gcgaacgcag
    24361 caccttgcgg cggcgggtcg cataagccga gccgtccggg tttttctgcg cccggatgcg
    24421 ctgctgctga ctgcggcgca gcgcctgtcc gacctgacgg gccgttttca gccgtccggc
    24481 aggtgacagg ccggaaagga tgtcatcaaa caccttatcc agcgcgtgaa ataatttatc
    24541 cgtcatgccg ctgcctcccc ggtggcatcg tcaagcaccg catcccatac cccgccggtg
    24601 agacgcggac gaggttcagg caaatgttcg gcacgcagga tgccgttatc gtcccgcgtg
    24661 accttaaccc gctcacgcac cggaatttca aacagaatgt cggcgctgtc gtcgttattg
    24721 atcagcgtgg tgaatttcac ctcgcggttc ttttgcgggt tcagcagcag gtcgggctgg
    24781 ttctgccaca accaggccat cagcggtaag gtgaaatcgt cgatatcgcc ggtgaagttc
    24841 atcacgaaca gcaccagcga gtagcggtac agaaacgacg gcgtttcccc ggtggtttca
    24901 atgccgcctt cttccacaaa caccgtgaag gcttccgggt tggcccggca ccaggtattg
    24961 gatgccgtca gcgcggtgcg tagcgagttg gttttcagca tgagcattcc cctatggtgt
    25021 ggccgcgtcc ttcaggcgct gaaggcgacg caggtataaa tcgttgatgg cggccttgtc
    25081 tgcgttgcag gtgtccagcg catccaaaag ctgatcactc cagagcgcga ccgcgcccca
    25141 ggtcaccggc gttttcagtg cgggcgtcgg tgtcggcgcc gtcaggctgg gcggcgccgg
    25201 gtcgtgcagt atctgcacgc tgagcgacgg cggcgcgttt ttgcaggctg tcgctgacag
    25261 cagcaggcac cacagtgtta gcgcacgtat cggactgcat aacttcgcgc agattttcac
    25321 ggcgttcttc cccttcggca taacgctgtt gctcacgctc gcgcacctgc gccagcacgt
    25381 ttctggcatc gtcggccagt gcccgtactt cggttaacag ttcgcgctgt tgccgggcgc
    25441 tgtctgtcag tgcctcggta tgtgcccggt cgataccgcg ctggtaggtt tgccagagca
    25501 cgccgctgac ggccagcacc agcagcacgg caagggtgac ggtcagcttc atggcacacc
    25561 cgccagatca cgcaggcacc aggctttaaa gtcgctgcgg cggttaacca gcccggtgga
    25621 gcgctggccg ccgctgttga caaaatcggt cagccgctca cacatcgcgg gccattcgtg
    25681 cgcctgcgca tgtttccaga tggtggtgcg ctgcttgctg ccctgccggt tggtaaacca
    25741 catcaggccg ctgcaaccga ggttaaacgc cgtgtcggtc atggcgtcaa acgccgattg
    25801 cggcatggca gcgccgttaa aattgccgtt gacgcagttc tctgcccgct gcatatcgtt
    25861 gacccagcgg cgggcgatct cgtcattgct gtacgcccgg ttttgcacgt tgccggtaga
    25921 gccaatgcca accgtcagca ccccggcggg gcagtaataa ggcgactggc gacagtcttc
    25981 ccaactggcc gttttctgct gtgcttccgg cgacgtgcgc agtgtgccgg gggacagcgt
    26041 gacgccgagc gccacaatca gcgcaatcga acagcgttta atcgcggttt tcatcgtcaa
    26101 cgtcaccctg atgcaaaata gccaccgcgc ggcgttccga cgcattcagc gtgcggcgtt
    26161 cggactgctg taaaatctgt tcgatcagtt cattgcggcg tcgttgtgcg cgctcgatac
    26221 gacgccggaa cagccaggcg cgccacgcgg tgacaacacc gataaccagg cccgccagcg
    26281 caactttttc actgacggtc atcaccccga tgccggtcac catcacggac aggccatagg
    26341 tcaccccatc attgaggcgc tgaagatcgt ttaatcccat aactgcaccg tttcctgttc
    26401 tgtctgacgg ggaatatcag gcagcgtgat agcctgcccg gccgtcagaa acatctggcg
    26461 gcttaacccc ggattggcgg cgatcacctg ctcggtgaca ccggcggatg tgccgtaatg
    26521 gcgataacag agcaagtcca ccgtatcgcc ctgaagcgcc cggactacca tcagcacaac
    26581 tccgcaaaaa ggcgctgggc gccgcgtata tcggcgatgc tccagcgcgc atcacgccat
    26641 aaatcgtcac gctggctgtc aaaggtgtcc gttgccttgt cgcctttggc cgtggtatcc
    26701 acatcgcggt atccctccag cagcagggcg cgggcgatgg cataaaccgc acgcttgaag
    26761 cggtacacct tgatgctttc gccgttgacc tgtccggccg ggacgtccgc cagtgcggca
    26821 tatccggcgg cctgttgtgt ctgctgccag ctcgccaact ggtcagtcac atgcaccacc
    26881 gcttcagtag tgacgtgcat caggcgggtg gtggtgatac cgccggtgat gcgggcggcc
    26941 aggcgcagat cgcgcaggac gatcaccggc cagaactccc cggcgctgac tgccgccgcg
    27001 ccgtcgtcaa tctccggcac gtcgccgccg tcactaacac gtttcgaagc caccaggctc
    27061 atgctcaact ctcccaaaag tcaggcggtg ggcgccgggc aaaaagaccg tatacgggca
    27121 gatcacccgg cgcgccgcct gtcggacggg gccgaagtcg ttaacgtttg gcagactgac
    27181 gggcggcttt gcttttgccc gtcgtccgtg tggttttccg cgccgtggtg ttacgcacgg
    27241 cggctttttt taccgctggc tgcgcggcgt cggctgaagc cgcaggcggt gtctccccgg
    27301 cgggtgtttc cgtggtcgtc tcatcgtcgc cgggcgcgcc gtcttccggc tcgttactgc
    27361 tgcccggcat gagctttttc agctcccgcg tcagggttgc gatctcccgt ttcactcccg
    27421 cgttcggatt gcgggccatc gcttcccgga acagtttcag tgcctcggct ttggtttgcg
    27481 catccaccgc tgcgcggcgc gagaaggcgc gggctttgca cagcttggcg cgcacttcat
    27541 ccggcatgtc tttgccgtcc acaatcgcgg ccacttcatc cagcacggcg gtatacccgc
    27601 tcaggtcggc atcggcatcg gtggttgcca gcgtcaacac cgggttgctc acttcctcag
    27661 ccagtaccgt taccgcatcg cggcggaact tgtcggcagg caaagacagg ccatgcttaa
    27721 cgacgtaacg ccccagcctc agtgtcagtg cgttatcctg gcagtcgatc gcccacacca
    27781 tcagggtgac gatcacctca tcctgtcggc cgctgtcgcc ttccagcgtg ccatcaatcc
    27841 agccgtcgta ttccggcagc atggcttttt tcatctccgc tttggtcgca tcagattgca
    27901 cctgtttcag cgcggcctga tgcaggcgca ggcggtgaag gatttgctca tgggcagtgc
    27961 gtgacaccgc cgtttcggtg tccgcctggc cccggcgctc ggccataacc cgctgaaaat
    28021 gtcgttgtgc cggtgtcagc atggtgtgtt ctccggttgg ggcggagtgt taccccgcct
    28081 ggctgttact ggccgtcgcc tgctgcctgc gcaaactgaa tgccgtcgat cagggccacc
    28141 ttgccgtagt cctccaccac aaagtcgtcg ttggacgact ggtaggtggc gatccggttg
    28201 tactgcggct cttcagcgat gctgcggcgc agtgccccca gttggtagta aaccgacagg
    28261 tttttgaacg aggtgatcag caccgcgttg gacgggaagt aaggtgccag aaaggtcggc
    28321 aggccgccca cacgctcctg actgacaatc aactgaccgg ccagtaactc ggtattgggg
    28381 ttgctctggc tcagcgcatt gaggcgcgga aaattgctgg acgtcagcag gtcggacgcc
    28441 ataatcacca ccagatccgg cgccttgcgg tgccacggat ccagcaggct gtttttggca
    28501 tcaaacacag cggtgtcgag gttgccgtag gtgcctttgg caataatctt gttgtcttcg
    28561 tcgcgggcgg tcagcgtgac atttttgata atgcggtgcg ccgcatcgtt gcgggttttt
    28621 tgcaaccagc cgacaccgca atcctgcaac agcggattgg cgctgcggtt ggacgtctcg
    28681 gcataggtgg tgccgttgaa accaatcatg atgcgatcga ggccgatttg ctgtgcattc
    28741 gcctgactga tcagcgcctg aaagttcggc tgcgtcgccc aggcatccaa ctgcgggtaa
    28801 ctgatcgctg agtcataatt caccttgcgg cagtggtagg tgttcgactc tttggaatgg
    28861 ttgtcggtcg ggttacggcg ggacgtgccg tcgctgctgt tgttggtact ggcgatcggt
    28921 cccttgctgc cgatcaggat cttctggcct tcctgggctt tcacgccaaa cacgttaatt
    28981 tgtttcagga attcatcgct ttcctgcgcg gcttgctcca tgcgctgctg ggcagccggt
    29041 tcgacgctga aggtcatcgc cacgtcattc ggctgcaccc cgttaagctg cgcctgacgg
    29101 gaaatgtatt ggttataaag attacgggta gagttttcca tgttcgcttg tctcgcttaa
    29161 cggtacttaa aagtcagcca gttgcgcgcc gctgttgccg ccactggccg gcggacgctg
    29221 gctgtagctg ttatcctgcg tcgccagctt ctgcgtgagc gcggccagct cgctggtcag
    29281 cgtctggatg gtgcggctgt cctgctgctg ttggtttttc agcgcgttga aattgtccag
    29341 caggtcagca tgggactggg cgacgttctc caccgcttcg cgtacctggg aaaattgttc
    29401 accgtctgac ttgcggcctt tgccgataat ccccatcacg cgggaaaacc actgcttacc
    29461 ctcgtcgctg cgctgttcgg acagttcgac cagctccgcc tccatcgctt cggtaaacat
    29521 gaccggctca ccgggcagat tgttgaatgc ctgcacctgc gcccgttgct gcgcggcgaa
    29581 cttcaggcgc tcggtgccca ggctggccgg ggtatccgtc atcgccagac cacgcagata
    29641 cggcctgccg gtcgcggcaa actgcggatc gatttcgata ctggaataaa tcttcttccc
    29701 ttccccggtg agctgcttca tccgctcggt gggttcgatt tccgcataca acgcggcgcg
    29761 gccttttagc gggccgtcgg taatgtcttc cgcgctcagc gcgacaacat cgcccatcgc
    29821 actgaaatca ctgcccggat agggcgaaag aatgtgctca acgttaacgc gggcgccgta
    29881 tacctgcggg ttgtagcttt ccgccattgc atagaggtgg tcgcgtccga tttcgcgccc
    29941 gtcaacggtg gaaccggaga cggcaacccg gaattttttg cgggtcggtt tggctgtacc
    30001 gctcatgcct gtagtcctgt cctgtggtgt ctgtgacgcc atgattgcag agcctaactc
    30061 cctgtctcaa cgcggttttg ttgtcggcgg agggccagag ccgaaagtga gcgaaaggcg
    30121 gatcgcgcgc ggggtaatct tcccggcaaa gggggaaacc gcgcatgatt caggacgcat
    30181 ttgtacggca gcgagcaaaa cagctttact ggcagggtta cccgccagcg gaaatttcgc
    30241 gcctgatggg gattaatcaa aacacggtgt atgcctggaa aaagcgcgac gaatgggacg
    30301 aaacgccgcc tatccagcgc gtgacgcatt ctattgatgc gcggttgtgc cagttggccc
    30361 agaagccgac taaaaccggt ggcgacctga aggaaatgga cgcgctgacc cggcagttga
    30421 aaacgctgaa tgacggccag ccgggcaatg ccgcaggcgg caagaaaccc cgccagcgca
    30481 aggttaaaaa tcacttcact gacgaacaga tcgccgcgct acgggaaaaa atactggatt
    30541 ccctttcgtg gcatcaacgt ggctggtatg agcaacgtca ccaccgaaac cgcatgatcc
    30601 tgaagtcacg ccagattggt gccacctggt attttgcgcg tgaagcgctg cttgatgcac
    30661 tgcgcgacga tgtgaaatac ccctatcagc gcaaccagat ttttctgtcg gcatcacgtc
    30721 ggcaggcgca ccagttccgg ggctttatcc agaaggtagc ggaggaggtg gacgttgagc
    30781 tgaaaggcgg tgacaaaatc gtcctgagca acggggctga gctgcatttc ctcggcacgt
    30841 ctgcggcaac ggcacagtcc tataccggga atctgaagtt tgacgagttt ttttgggtca
    30901 gcaacttcac caatttgcgc aaagtggcgg gcgctatggc gacgctgaag gggctgacgc
    30961 gcacttactt ttccacccca tcgagtgaaa cccatgaagc gtacccattc tggacgggcg
    31021 cacgctggaa tgagaaacgc agcaaggcgc aaaaggtcgc gtttgatgtg tcatggaaag
    31081 cactcaatag cggcctgctg tgcccggaca aaacctggcg tcagattgtg acgctacagg
    31141 atgtcatcga tcacggctgg gaatacaccg acctggaaga aattcaggat gaaaacagcg
    31201 gggatgattt tctcaacctg tatatgtgtg agttcgtccg tgatggtgag tcggcgttca
    31261 atctgaatgc acttatcgcc tgcggtgccg acggttacga cgaatggccg gactggaagc
    31321 ccttcgcgtc acgcccaatg gccgatcgcg gcgtctggat tggttatgac gccaacggca
    31381 gcagcggcaa cggcgacagc ggggcgatct cggtggtggt gccgccactg gtggcaggcg
    31441 gcaagttccg caccatcgaa acccagcaaa tacgcggtct ggagttcgaa gaacaggcga
    31501 aagtgatcga agcgctgacc ttcaaataca acgtgcagca tatcgccatt gatggcaccg
    31561 gcattggcga agcggtctac cagattgtga agaaattctt cccggcggcg gtgtgcttcc
    31621 tgatgtcggt gtcatccaaa cgcgccctag tgctgaaaat gcttcaggtc attcgtgccg
    31681 gccgctggga atacgaccgc agcgaacggg cgctaatcaa tgcgttcaac gccgtgcggc
    31741 gcgtcaagac gccgggcggc atcatgactt acgacaccga ccgcgcacgc ggctctaatc
    31801 atggcgatct ggcctgggca accatgctgg ccgtcatcaa tgaaccactc ggccaggagc
    31861 agggcggcgg tggctttgcg atggagttct gatgaaaaga aaagataaaa ccggcacaca
    31921 ccgggcggtt accgccagtc agccggatat ggcggcggcc ctgaaaagcg atccggggct
    31981 gagcgcgttt acctttgacg gcccctatcc ggtcagggat ggccatgacc tgctggataa
    32041 catgtattgc gccgacaatg gccgttatta cgacaccccg gtggattggt acgggctggc
    32101 tcgcgcgttt ggtagtgcgt catggcacca gtccgcgctg tacttcaaac gcaatgcgct
    32161 gaccgggtgc tttatcccgc acccgctatt gtcgcgtcag gcgttctccg ccttcgtgct
    32221 cgactggttt gttttcggca acggttacct tgaacgccgg gtcaaccggc tgggcggcgt
    32281 gttgtccctg cgccacgttc cggccaagta cacccggcgc ggcagcgatc tgaataccta
    32341 ttggtttatc cggcagtgga aagatgaaca cacgtttgat accgacagcg tgtgccacgt
    32401 catcaacccg gatattcacc aggagatcta cggtatgccc gagtacatgg gcgcgctgct
    32461 gtcggccagc ctgtcgcact ctgccgatat gttccgcaag ctctactatg acaacggttc
    32521 gcacgccggg tgcattatct acatcggcgc atcccaggtg gataccgaaa gcatggataa
    32581 cgtgaagaaa acgctgaagg aagcgcgcgg taaaggcgcg tttaaaaacc tgctgttaca
    32641 cgcgccgggc ggcggtgaaa aaggggtaca gattattccc ttcagccaga tatcggccaa
    32701 agatgaattc ctgaatatca aatcggtgac gcgtgacgat atcctcgcgg cgcaccgcgt
    32761 gccgccgcaa ctgatgggcg ccatgccgga gggtaacggc tcctttggcg atgtggagaa
    32821 agccgcgcgg gtgttcgcca tcaacgaact gatgccggtg atggaagcgc ttaagcatgt
    32881 gaatgattgg ctggggatgg aggtgatccg cttcaaccct tacgccctgt tgaaagccga
    32941 gtgatatccc accgccgccg ccgcactcac gcggcggttt tcattcaaaa actttcacgc
    33001 catctgcgaa caatctcttt tcagatcaac ggctaacacc accatttccc acacacataa
    33061 aaccgcctca gcgccgcgct gtcgggctct ctcaccggat gacgcgccgc atctcccgga
    33121 gggaaatacg cacgcagcag ggcgggaaat gggccggatt cggcacagca aaggggaacc
    33181 ctacctaccc cccatcgcgg gggctgttcc cccgtcacct gcgcgcgact ctcgcttcat
    33241 tttttgtgca agtgcagaaa ccggcccagc acgcgtgcgt accgggcgga aaggggaaaa
    33301 atagcatcaa aaaaattgtg caaaattgtg cgggtttgtg catacaaaac gtatagatat
    33361 aaagcagcta ttttagagat atgtattgat ttattataac caccaagtga cttattataa
    33421 gtttgctatt atttactgca gaccccactc cctatctggt aacctatctt taaaagcaag
    33481 gtattcataa aaatcacgag tgtaagaaaa taaacattca cacatggcac taccagaatt
    33541 agcaagggcc atcctaagta caacatccgg tttcggatta cccatcagct gactatgaac
    33601 atgagcaacc gttgagccat gaacacataa tagtagtgat gattcaaatg taacgacggc
    33661 atcaattaga cgctgatgaa tagtagccag agtggcttta ttcgaaataa ttgcagatag
    33721 gcatctacga tcacccgtca taaatatcgc atctggattc tcaatacagg aagcaagcaa
    33781 aaattgctca cccacgtcta tattaggcac atcacccaat aattccaaaa gggaaagatt
    33841 cataatttca ggaacatcat ttaccgattc aatgaaagcc cccagctgtt catatatttg
    33901 ctgacttcca cactttcgaa ttgctttatc tggattatca ggaagcagct ggtacctagc
    33961 tgctgggtta atgaaaattt gatcaggttg ctcatttaat atcgtagata attgtgatag
    34021 tagattacat tgagctaact tcaatatgac atcattgtca gaaagaacaa tcacgtatca
    34081 ttccccgata agattttcca gaatatttag atcatcttca ttgatgcttt ctaaatctat
    34141 tccctttttc atcatatcct tgatgaagtt ctgatcggtg gggtgtccgt tacaaatagc
    34201 cttcacggca tttactgcca ccccccagtg tcccataaca aaaccgtaat tcaaggcaat
    34261 atgggtaggg tcaacacctc tttcgctgcc aaattttttt gccgcatttg ccagttgagg
    34321 cgcttttaaa aagcgtcctg taggtacaat gcgaagagat ttttgtccag aaaggacttg
    34381 aaacgcaaac tcattagctt ctttttcaat atcactagtt gaggctgact caatcttctc
    34441 atccacatga cattgtccat tttcagcatt taaatgccct ttcgcaatat gccccaactc
    34501 atgcgccaaa tcaaaaagca tatacccata cttttgaggt tgggttaata taattactgg
    34561 tcttccgcaa ctcattaaag ctaaaccagc cattttctta gcaccacgag ggaatttctt
    34621 aagatatata acaggaattc ccactgagtg acaatattca accaaattcc caagtgaaac
    34681 ccatggatta ctttccatcg tatcttttct gattagttct ggatctagaa ctatctgcgg
    34741 gtcatatggt tttttaaaat tcgatgcaac aatttttgca gcagtataag caattgcagt
    34801 cgctatatct aaatcatcat cagcaacatt attccgatgc ttaaatttat gatttccacc
    34861 aaaattaaaa caaatccctt cgctctcatc cttaaggctt tcaggtaaaa tactaaacat
    34921 tcgagccaag tgcaggcttg cgtactgacg ccccgaaggg gtatcagcca atcgctcatc
    34981 ccaccattca ggcaataagc tcctgatgta cgacaggttg aaaccagcgc tttggaattt
    35041 attatatatg cttctcatat gattagtatc gttcatgaga gcctccagac tacatgtgtg
    35101 tgaacaaaat gccataatgt cttacctata tttatggcat aaaaatcgtg cgtactatag
    35161 ggaaaaaaga tcgaaaacgc atcttttttt gttctaaggt acgtatacaa tcaaagggaa
    35221 aaacaaagaa ccatcagatc tcattcactt agtaaccaca agagtaccct gtacttctat
    35281 ctcaccccca acactccatg ctccttgctt accagtcata gtactgagat aaaaatatat
    35341 taatattttc agttacttac atacgtcctc gcaaaatcag tcgattgcct aaccagtaat
    35401 aatcaaataa acattttatt tagtcagcta acttttacta aaaaataata ttaatatttt
    35461 taataaataa tcatactatt caaatatatc accagcattc aataaattat tactcccaat
    35521 tccaccccgg ccacagctcg caatcccctg tctggcctac ttcctccagc ctaccgttaa
    35581 ccattttcag cgccctgccc tcgcttattg ccagattgca gccacgaatc agcacatcga
    35641 ccagccccgg atcaggcgga aaaccgcgta agcgcaacag ttccgataat cgccgccgta
    35701 ggcccgacgt acagttattg acagaactcc aagcggcggc ggggccgcca gaaaccccgg
    35761 cccccgctga cgcggcggcc tgtttcggga caatcttcca ttccaccgtt cgagtgatga
    35821 tcgcggagcg ctcccctaat aatggcgagt acaccccctg aaccttttgc acgtcttcgg
    35881 cgtactgatt ggcacgctcg gtcacttcat aagacaggcg caccaccaac tcatcacgcg
    35941 agactaacgg cccgccctgc gcctgtgtgt atgccgccca gtcgcctaca tctgccgccg
    36001 ccagtaccgc atccatcgcc gcgttatcca gttgcttatc acccaggcga cgcaactcgc
    36061 ggtaaaccgt caccggcgcg ccaccgattt gctgaaattg ccggatacgc cagcgcgacg
    36121 cccaggcaga taccgccttt gccatgtcgc gcaggttttc cccggtttcc tcgtcggcct
    36181 cgccatccag tgcgtaaccg tcgatattct tgctgatgta cttggcgata taacccgtag
    36241 cactgccttt ttccgggtca atcggttcat agtggaagcg ggctttttgc gccttttcac
    36301 tgttcagctc gccggagtct tcccggcggg cgtgatacgc catgatgtca cgcacctgtt
    36361 caatgtgctc cgggcgcatg aataacaaca aatgccagtg cggcgtaccg tcgtgatgcg
    36421 gttcgacgac acggaagccg aacacgctaa tctcttcgcg tgacagctcc gcccggatac
    36481 gcgcccacac accgcacagg tatttctgtg tgtcgcgtgg gctggcaccg ctccactgct
    36541 caacgaaccc gccgccactg tgtacagcgt gataccgtga cggcgcggtg atggtgtaaa
    36601 actctccggc gcagcccatt tcctgcgcca aatcctcaaa gccgcgcatt ctcaccatca
    36661 gctcacaacg gcggattgcc gggttggcgt tgctggcatt aaccatgtca tccagagaaa
    36721 cacggttacc ctcttcatct tccagatcaa acgccttgaa aaactcccgg ttacgccgtt
    36781 tctgctcttt ccattcatcc agcgtggagc gggaaacata gggtgacgcc gccttttgca
    36841 cctggccgac cgcgatagcc atatgctccc gctggatatc gcggcggcgt tttagtcgcg
    36901 cccgccacca ctccggtgac atcatgcgta acaggccgga ttcggctttc tcggtggata
    36961 acgggcggcg gcctttggtg aattgcgccc agtaaggcgg ttgtgttccg gcctgcaagg
    37021 tcagcaagcc aaggtggcga aacgacagca gggtaatata cctgtccgtc agatttccag
    37081 tgtttctgat gcggttttcg gtgtagtcac gtaacgatgc ggccataaag tcggcaacct
    37141 gttgcgataa ggcgcggatg ttgtcacggt cataaaccgg catcttttcc agatcatcgc
    37201 agaacgggaa cggcagatct cccgccgcac gctgttgcgt ctggtatcgt tcggtaacgg
    37261 tgcgcaggcg tggcaatacg cttttcccca gggtacggag taaaaacgta ttggcccggc
    37321 ggcggccggt gtgctcatca gatttaaaca gcttttcata acgctggccg aaatacttcg
    37381 ccagataatc cggcattccg gccaggtact gctgacgcca ataatgatca accttattca
    37441 ggtgccacag gctgcgctca acgaaactca gcccggcagg ctcgccgggg gaaaactgct
    37501 cacgctgcca ttccctgaca gcgtgatacg cgccgttatg ttcagggaca tgtaaatcaa
    37561 tcactcacaa accccagcac cgatccgtat agcaaacacg tttaccggtt tatcgccaaa
    37621 atgcggatgt gtgatcgtct gcatttcata gccaagccag ggcaggatca ggcggcgtga
    37681 catatcagaa cgagccggat agccccatgt aatcaccagt tgctcataat cccgaccaat
    37741 gagccgacgc cgccagtagg cattgtccaa ccggtattca aatggcttca tcccagcctt
    37801 cattgcggcg aaatattccc ccatcaccgc gagttgcaga atgctcacag acaaccccct
    37861 atggcctcaa caacccggca catagcaacg gggggtacag cattacccgc catattgact
    37921 gtcaggcggt ggctgtctgg cgtgatatac gatgacgaaa aagacattgc ggccaatacc
    37981 tcgcgctttg tcaccatccg catacgatca ccatccacca ctgcccatct atcgcgggtt
    38041 gtaattgtgc ctatcggcct gtcaattgag cggcccgatt ttgtatttcc gtagtagctg
    38101 aaaatgaatc gttcaccgaa ctgacggcga ccgttttcga tgcgtgctag cgtcgatatt
    38161 gcacgacccg gacggtttat ctgtgaccat cttccgtcat caaaatcaat gaatgtggtg
    38221 gcagggacgt gactgaggcg aggcaggtcg agcgaaagtg gggagcgact gcgagtgcag
    38281 atcagaaaca atcggacgcg attctgagga acacccagat cggcacaatc aacaacatgt
    38341 ggcgataacg cataacccaa cgccgccatt gccgccgccc atgctggata caacgcccaa
    38401 tttagaaatt caggcacatt ctcaacaatc actgctgagg gcttgtgata ttcggctgcg
    38461 gacacaacag cccacgctgt cgagcgactc gcatcatgct gcggatcacc cgctgttttt
    38521 ccgcgtgccc ggctatgccc ctggcagcaa ggggaagcca tcatcaggtc atgtgccggg
    38581 acagaactcc agtcagcctg atgcaagtcc tgacaaacgt ggattgcatc gggatggttt
    38641 aaacgatgat attcaacggc agcgggccag tgattagcag cccataccac atgcgctcct
    38701 gccatacgcg cgccggttga tgagccgccg aatccagcga agagatcgat agccctcatt
    38761 atgcggcacc tcgctgccca tgcaccggca gacgcttagc aataatttcc ccagcttgtt
    38821 tgctttcccc agccgcaacg ccgacgctac gcggtgcggt gaagcggcag atatcaaacc
    38881 ggtggtaaag gctgtgcgcg tggtgagtgt cgctgtttga tgcgatgaca gggatcccgc
    38941 gctcggccag gcgtgataac gcgctgcaca ggtcatactg atcgttgtgg gtgaaaccat
    39001 cggtgtgata actggtgaag ctggccgttg gcgtttgcgg gatgtatggc ggatcgcagt
    39061 acaccacatc gccggggtga atcagttgca gcgtttcgcc aaacgcggcg cagatgaatt
    39121 ttgcacggcg ggctttttcg gcaaatgcct gaatctcggc cagtggaaaa taaggcgatg
    39181 cataatgccc gtaaggaacg ttaaacccac cggcgcggtt atagcgacaa acgccccggt
    39241 aaccgtgccg gttcagataa agaaacagtg ctgctgaggt ggtgcgattc tctttgctac
    39301 gattaaatac ctgccggaag cggtaatagc tttctgctgt attcgcagtg cgaaacagac
    39361 cttcggcggt atcaataaaa tccttcacat cctctttgat gacctgatac aggttaatca
    39421 ggtcgggatt gatatcggcg atcaggtatt ccgggtaatc ggtattcatc atgaccgcac
    39481 aagacccggc gaacggttcc accagacggt cgccggccgg taaatgctcg cgcaggatat
    39541 gcatcacgcg ggccttgctg ccgacccatt tcagcggtgt ggcgatagtg ctcataaagc
    39601 cccccgatag tgtttgtttt tcagttcagc atcaccctgg cagtacacgc acagacgcac
    39661 acccggaacg gccacgcggc gggcttcggg gggcggtgcg tcacagcttt cacagacgga
    39721 tgcagaaacg gcatagcccg actgttgccg ggccttctgg atttgcgttt cgcggatgaa
    39781 cgtttcgcgc tcttgagcta tgtccattga gtccatcagc tcagcccctg agcggagtgc
    39841 tcaaaacgtt ctgattcctg gcgtataagt tccaccactt cggcggcaga gaggtcgcgt
    39901 tgttgagcgc ggacagcaag cgcagcaagg cgcagtgaga aggaaaaatg ctggtctttg
    39961 cgttcctcca atcgggcctt tttcagcagc tcgaccagtg cgccatcagc ggcgacggtc
    40021 atagttttta cttcggcatt tttcattacg gtttcctttt ttcaggtaat acgaatccct
    40081 gcccgataaa gggcatttat tcgttgttat gggttaatta atgaataggt gactggctcg
    40141 gcttattggg tgtgccgttt tgattactgg ttttcagaaa atcatccggg ccaaatagcg
    40201 cagtttcatc gcaaatagac cggatgcgct taattgcccc ccaaatagcg gcgcgctctt
    40261 ccgccgtaaa ctgatgccat gagtaattga catggcgcga cttcagcttt ggctttgcgg
    40321 aaaaaaggat aatctcacgc gtttccagtg cagcacgctc ccaaaatgac tgagcgcggg
    40381 attcaccttt aaacacgata tccctgcaac gctgtatcca tttctgatga tcgacagatt
    40441 gagacatgct ccctcctgat taccgattaa acgccccttt cggcgggttc caacggcggc
    40501 catccggccg aataatgatg ccttgcttgc cctctccgtg gcgtatttct ggtttgatac
    40561 ggctttctgt ctgttgctgc cagaggaaag gcgcaattga gattggtttt tgcattgatc
    40621 ctcctattgg taaccgccca cagatagacg gttgcaaata ggtgccggga tatttagcca
    40681 cgcccggccg tggtttctct ggtgttgttt ttattcttta tcgctgcact attgatatac
    40741 gctgttatgt aagctgtcga tataaccggt agctaatgcc agcgcatcaa ataaaccgta
    40801 agactgccct tccctgctaa cgcgatatcg cttaattgag tttgtgattg ttcttggata
    40861 ttcaacaact gaaaagccac gatatatact ggtgtgctta ctcaggcgaa taacagcaaa
    40921 ttccttttta accataatta ttcacctata accccagcca taataaccat gcgtcacgct
    40981 gttctttcgg cctgttcata aaggcatcgc gcatagcacg gttaaattcc gggatataaa
    41041 cccaattttc accgcgacga ggattagggt tttcaggatt cacccacgga ataagcggca
    41101 attttccatt atcaaccatg cctttcactg ccgcttccga cttaccgatc aattccgcaa
    41161 atttctgata cggaacagca tcaaccggat agcgaacctc ataaacgcgt tcactcatca
    41221 caaccctcgc ttttcatttt gcgttattga atatgtaccg ggatttttag ccacgcccgg
    41281 cgcgtgcgct gtggtatcct cgctacgccc acacgttcca gccagaacgg gcataacacc
    41341 aactacagag gacgagtcat catgcttagc actgcatctt ccgcagaaca ggacaccgac
    41401 aattttcacg ttccaccccg tcccgccccg aagcctacaa agaagggcgg ataccaatag
    41461 ccaggagtcc atatgaacga gcaacaaatt cacaatattc gtttcgaact tgcctatagt
    41521 taccagcttg aaaaaattac agaggttttt aatcgacgta tcgataagct gctctgcctt
    41581 attcagtttt tcctcggtag cgctgttgta actgaacacg gttccggttt gttgctcggc
    41641 atcttaattg caatcatttc ggcgctactt tttacactca agcccggaga aataaccgga
    41701 ggtgcgaaac agcaggcaca aaaatatcga attctccttg atgatctcga caccagtgat
    41761 attgaaatca ttaagcagaa aaagtatgta atagaacaaa ccgatagccc acacccctat
    41821 tcactatgtg gccccgccta tcatcgggca gctgttatgc ttggccttcc ggctaatagc
    41881 aaattgacgc ctatggaaaa gctattttct ttcttttgcg gcggcatccc tcgttaacca
    41941 cccgcagaaa ctattagcca tttatctatt ttaattaaat tcatgccggg atatttcacc
    42001 acgcccggcg cgtggttttt gtggtagatt tcaagtgcca acaatcaacc aaccacacaa
    42061 ggaaaataac gtgacaaaga aacgtaccgt cattcccacc tataaagtgc gctgcaatac
    42121 ctttgataat cttattgaga ttgaattttc tgttcctgat gaccagattg ttgcgattcg
    42181 gctaaatgcc aatcaatcgc gcgagctgat tgctcaacta aatcatcatt tagatgaatc
    42241 aatgatttgt tctttcgtgt atccaacaaa aaagaacgta ctggcgctgc gggtctgagt
    42301 agcgccttcg ctaaccctcg cctttatctc aagagttacg gcatacgtat taattacggg
    42361 tgattccgct gtaacttcag cttcccgcac atcgtcttcc ttcatcctct ccccctcacc
    42421 gtgatactct ctttcgatca ccaaccgctt acatctgctt tcagttgctt atgttcgcgg
    42481 ttggtttttc gcgcctcaaa aggttttcaa ctgaatacct tttgagtgga atatagtctt
    42541 cacatgggaa ccatgtcaat ggatatagct caaaaaatca aattgataag aaaggctgag
    42601 ggacttacac aaataaaatt ttgtgaaatc agtggtatag cgttaagcac tctaaaaaac
    42661 tacgaaggcg gccataggga acctggactg caagtggtgt tacaaataac aaatacaaag
    42721 cagttccaaa aatacacact gtggttgatg acggataaaa cagcaccgga agctggtcag
    42781 atcgcaccgg ccctcgcaca cattgggcca gacgaaacaa aatctcacca atcaaaccag
    42841 aatattgggt aaatatttac ataagttaca tctttgatat tgcgtatcag gatgatgact
    42901 acatcggaga gtgttcttat ggcagttaag aaactcgatg atggtcgcta tgaagtggac
    42961 attcgcccga tcggacgtaa cggaaaacgc atccggcggc ggtttgaaaa aaagacagaa
    43021 gcggtagcct tcgaacgcta cacgctgtcc agagcggaca aaaaagagtg gcagcacggt
    43081 tatggcgttg aacatcgcca gctcagtgaa ctggttgaat tgtggtggct ttactacggc
    43141 cagaatttga agaatggttt gatagaaaag cgtcatctga aacggacagc ggcccagatg
    43201 gacgacccgg agatatgccg gataaacaag cgctcaattc tggagttccg tacccggcga
    43261 ttatacgacg gtatcagctc ttcaacggtc aaccgagaca tctatcggct ttccggaatg
    43321 ttttcggcac tgataaagct ggagatctac actggcgaga atcccttaaa ggaattgcca
    43381 ccattgccag aaaagcagcc aacagtcacc ttcctgacgg aatcggagat tgcgcgcctg
    43441 ctggatacaa tggaagacga tcagtaccgg ttggctgtgc tgtgcctgag caccggcgca
    43501 aggtggggag aagccagcac attacgggct gaacaggtga tgcataaccg ggtgacgttt
    43561 accgaaacca agaacggtaa aaacagaacc attccgatat cggaagaggt tacgcggatc
    43621 atcaaaaccc gcgaaaccgg aaagctgttt aaagtggact actcggcatt ttgcgagcaa
    43681 atcaaagcgg taaagcccga tattccgaaa ggccaggcat cacacatact gcggcacaca
    43741 tttgccagtc attttgtgat gaacggggga aatctggtgg cattacagca gattttaggt
    43801 catgccagca ttcagcaaac catgacttac gcgcatcttg caccggacta tctgcaaaac
    43861 gctataacac tcaacccatt acgggggaaa atagcggttt ag
//
