# Supplementary material for: May the Phage be With You? Prophage-Like Elements in the Genomes of Soft Rot Pectobacteriaceae: Pectobacterium spp. and Dickeya spp
Source: Front Microbiol. 2019 Feb 14;10:138. doi: 10.3389/fmicb.2019.00138 (PMC6385640; doi:10.3389/fmicb.2019.00138)
Supplement: Supplementary file 2 [file Data_Sheet_2.ZIP › Supplementary_prophagesGENBANK_files/Genbank FILES _SRP_prophages/phiDda6.gb]

LOCUS       Exported               32536 bp ds-DNA     linear   UNK 02-AUG-2018
DEFINITION  phiDda6.
ACCESSION   .
VERSION     .
KEYWORDS    .
SOURCE      phiDda6
  ORGANISM  phiDda6
REFERENCE   1  (bases 1 to 32536)
  AUTHORS   .
  TITLE     Direct Submission
  JOURNAL   Exported Aug 2, 2018 from SnapGene Viewer 4.2.3
            http://www.snapgene.com
FEATURES             Location/Qualifiers
     source          1..32536
                     /organism="prophage phiDda6"
                     /mol_type="genomic DNA"
                     /note="/genome_id=6666666.356856"
                     /note="/genome_md5="
                     /note="/project=robertczajkowski_6666666"
                     /db_xref="taxon:6666666"
     CDS             complement(94..1185)
                     /codon_start=1
                     /product="Phage integrase"
                     /label=Phage integrase
                     /db_xref="SEED:fig|6666666.356856.peg.1"
                     /translation="MAVRKLASGKWLCECYPFGREGKRVRKQFATKGEALAFERFTMEE
                     IENKPWLGEKADNRSLREIIDLWFSLYGRTLADPKRMMAKLDIICTGLGNPKARELSAA
                     DFAHYRELRLAGQMTDSSGIPLAVVKPRTVNLEQRNLSAVFGTLKKLGHWDAPNPLSGL
                     PTFKIAQQELAFLAPNEIKRVLDACAESANPHLLLVTKICLATGARWSEAEGLSGQQVT
                     PYRITYTRTKGKKNRTVPISRELYDEIPRKSGKLFSPCRKAFERAINRTGIQLPDGQCT
                     HVLRHTFASHFMMNGGNILVLRDILGHADIKMTMIYAHFAPDHLEDAITKNPLNGLNWS
                     PKNGGRVAAANGNHSFSSPLTTE"
     CDS             1221..1337
                     /codon_start=1
                     /product="hypothetical protein"
                     /label=hypothetical protein
                     /db_xref="SEED:fig|6666666.356856.peg.2"
                     /translation="MYKNSNQCMDVVRANKQRKVAKATLEVTVRLRSGDVFT"
     CDS             complement(1293..1664)
                     /codon_start=1
                     /product="Phage protein"
                     /label=Phage protein
                     /db_xref="SEED:fig|6666666.356856.peg.3"
                     /translation="MKVLLSIKPEFVEKILDGSKKFEFRKGIFKNPDVKSVVIYSTMPV
                     GKVVGEFDIDAVIEDEPSKVWSKTKKYAGISKNFFDEYFGSKEKAFAIKIGDLRVYETP
                     LQLSALGENITAPQSYRYL"
     CDS             complement(1642..2715)
                     /codon_start=1
                     /product="hypothetical protein"
                     /label=hypothetical protein
                     /db_xref="SEED:fig|6666666.356856.peg.4"
                     /translation="MENLKYIPFNHVDFSDDFFTSLKSDYSHGFVEWFEKKCNSPQEKA
                     YVLYDENKKIDGFMYLKIEEGNVEDTEPQLTAHRHLKVGTFKFNQKGTLRGQRFLKKIF
                     DHALTEKVDDIYVTVFDKHSYLIRLFQLYGFVNVGKKTSLNGIENVLVKDMGTEGLTGD
                     LLSDYPYINNRNKERKFLLSIYPTFHTRLFPDSKLVTESPDIISDVSYANSIRKIYICA
                     MQDVLLMKAHDIIVIYRTSDNQGPAYYRSVATSLCVVEEVKTIDSFDNEEEFIKYCSRY
                     SIFTEPELRGIYKSRKYPYLISFTYNLALPKRLNRAKLIQDVGLNPNNYWGVLKLTDDQ
                     FDRITELGEINESIIVN"
     CDS             complement(2747..3835)
                     /codon_start=1
                     /product="hypothetical protein"
                     /label=hypothetical protein
                     /db_xref="SEED:fig|6666666.356856.peg.5"
                     /translation="MEIIMSRSLAIWGCRDYSGSNHEEDINDPFIDDLHINFWNINSKK
                     LYCIDFGILFKKPEVDEISEKGAICIYIPFKKKKSEINDLSSYLNENDDLITAVFNEYL
                     NKKESIGNAFTKIHLTNKEAIIMNTKLDSDSGTFDNRLTLTERDDGTIIILKIKECISR
                     ESEHQHYIRFRIFIDKNEIKEIVRTFIPGDNFLKSNQERTDIIDFRINEQRNLPSGISS
                     TLSAAVCTPQKYHFFIIRDMSDEHSSAGKNYQGCRILEKETWQKYFQNRKALGDSSPII
                     YHWKLKVDTNKKERLTDFSAIARFKNTRTKFRKIIAYILYGLAISFSIKYIPADNSIIG
                     SSLLFLSIIYIAISISSYLKKD"
     CDS             complement(3887..4453)
                     /codon_start=1
                     /product="Repressor protein CI"
                     /label=Repressor protein CI
                     /db_xref="SEED:fig|6666666.356856.peg.6"
                     /translation="MNLGTGAKAAIERLVEAYGFKNRQALCDHLGVSKSTLANRYMRDS
                     FPADWVIQAALETGVSLRWLATGEGPKFDDARNDVIAIPRQKLIDGKLYDSNYYMFDKA
                     FLPDGLKDPVVILDGNITYIADRQFDEVVDGKWLVEIEGRTSIRDLTRIPVGKVRVSGA
                     GAEFDCGLGDISVLMKIIMICCKNI"
     CDS             4466..4804
                     /codon_start=1
                     /product="hypothetical protein"
                     /label=hypothetical protein
                     /db_xref="SEED:fig|6666666.356856.peg.7"
                     /translation="MYTFSLTKTKSDRKFRVYTKSGLITVHNGSPQANRECCIMRPQIS
                     ITLAVPSVSIEKYSELTGLSIDTINDMLADGRLTRHRLRKDKKREKVMINIAAMTVDAL
                     ADCDISLN"
     CDS             4837..5346
                     /codon_start=1
                     /product="Transcriptional regulator"
                     /label=Transcriptional regulator
                     /db_xref="SEED:fig|6666666.356856.peg.8"
                     /translation="MFDYQIAKQMHFDEACRAFSLRHNLAELARMAGMNQQILRNKLNS
                     DQPHKLTCEELLTLTDITEDATLIDGLLAQLNCLPAVPVNEARAERLTAYVLQATAAVG
                     KVAAESVSDERMTQTRRHSLMSTISDGVRYLSLIGLTVQSRIQANPAMASTLDALSGLG
                     ASLTIG"
     CDS             5443..5598
                     /codon_start=1
                     /product="hypothetical protein"
                     /label=hypothetical protein
                     /db_xref="SEED:fig|6666666.356856.peg.9"
                     /translation="MQKPISIAPFLRNNQAGASLPVEVRHGKGKQGIIIRPDGRRWSPP
                     KGAFNR"
     CDS             5611..5940
                     /codon_start=1
                     /product="hypothetical protein"
                     /label=hypothetical protein
                     /db_xref="SEED:fig|6666666.356856.peg.10"
                     /translation="MSQSVDHQKWIQRCRDIVFKGESRAQSFWERAALDTREIILFSAK
                     PKLKSRHVNYSWHQFTAEERAAIWGAIKRIRSICDETALFGPDDFLKTRNQNGASNTPN
                     PSPIH"
     CDS             6036..6242
                     /codon_start=1
                     /product="hypothetical protein"
                     /label=hypothetical protein
                     /db_xref="SEED:fig|6666666.356856.peg.11"
                     /translation="MNAAADGALIELLNKARREERKEQHFSFSLRLAALAVRAQQRDLS
                     AAEVVELIRQESERFEHSAQELI"
     CDS             6242..6565
                     /codon_start=1
                     /product="hypothetical protein"
                     /label=hypothetical protein
                     /db_xref="SEED:fig|6666666.356856.peg.12"
                     /translation="MDMPQNPAYNRVDINGRYAIAKVGYDFALGEVQCDNRDGAQPYLS
                     TLAVYQTPITLVNDFVHRSLCAEIRRGTVTDITTMLTEAERLSLLCLNAFEQLENTGTG
                     LSE"
     CDS             6562..8652
                     /codon_start=1
                     /product="Putative replication protein"
                     /label=Putative replication protein
                     /db_xref="SEED:fig|6666666.356856.peg.13"
                     /translation="MNPEHNGAYHVVNQWRREQFTRNEPDGLTYVERSLWHLNPLDHQW
                     RQQYLAGMPDYLAKYFGQRYEKLFTSDEHKGRRRANTFLLRTLGKSVLPRLRTVTERYQ
                     TQQRAAGDLPFPFGDDLEKLPVYDRDNIRALSQQVADFMAASLRDYTENRIRNTGELTD
                     RYITLLSFRHLGLLTLQAGTQPPYWAQFTKGRRPLSTEKAESGLLRMMSPEWWRARLKR
                     RRDIQREHMAIAVGQVQKAASPYVSRSTLDEWKEQKRRNREFFKAFELEDEEGNRVSLD
                     DKVNASNANPAIRRCELMVRMRGFEDLAQEMGCAGEFYTITAPSRYHAVHSGGGFVEQW
                     SGASPRDTQKYLCGVWARIRAELSREEISVFGFRVVEPHHDGTPHWHLLLFMRPEHIEQ
                     VRDIMAYHARREDADELNSEKAQKARFHYEPIDPEKGSATGYIAKYISKNIDGYALDGE
                     ADEETGENLRDMAKAVSAWASRWRIRQFQQIGGAPVTVYRELRRLGDKQLDNAAMDAVL
                     AAADVGDWAAYTQAQGGPLVSRDALVVRLSYEVTERANQYAEDVQKVQGVYSPLLGAHS
                     AIITRTVEWKIVPKLAAASAGAGVSGGPAAAWSSVNNCTPGLRRRLSELLHLRGFPPDP
                     GLVDVLIRGGNLAMSEGRTLKMVNGRLEEVRQTGDCELWAGWNWEAFPDHIDNLSLTEF
                     TV"
     CDS             complement(8859..8981)
                     /codon_start=1
                     /product="hypothetical protein"
                     /label=hypothetical protein
                     /db_xref="SEED:fig|6666666.356856.peg.14"
                     /translation="MKQNNKKKSLTIKYIYQYSAETNCLINNSRFGHTTKNHLF"
     CDS             9163..9567
                     /codon_start=1
                     /product="GepA protein"
                     /label=GepA protein
                     /db_xref="SEED:fig|6666666.356856.peg.15"
                     /translation="MKAQKLTYIAHGISLGHSGAGLLDEPVCAWRYGPVLPSLYHALKH
                     YGGGVITKAVPDSSFFIPSADIEAYTNSVVKLVYDTYGRYSGETLSEFTHRNGTPWHQT
                     YAAGKSIIDDQLIASYYQRLMSKDPSCIGL"
     CDS             9610..10137
                     /codon_start=1
                     /product="hypothetical protein"
                     /label=hypothetical protein
                     /db_xref="SEED:fig|6666666.356856.peg.16"
                     /translation="MSKSSQSRVLSEDVQATESTITGVVDLNSLHFQDLPSLGDLPEPP
                     PPIQGPSQKASNREGDCEESTTDEMQNAWLASLNGRIRYLEARAQAAVKHAEADGTLTD
                     NALRKDMADKTFSFMERWCIFVGLVIFIYIAKHDGDPPKEVILALLGTCTISIIGLVGF
                     VVSGLFKSSKKE"
     CDS             10431..10586
                     /codon_start=1
                     /product="hypothetical protein"
                     /label=hypothetical protein
                     /db_xref="SEED:fig|6666666.356856.peg.17"
                     /translation="MDREFEQSLIVERIAFLAKNAGMDGNDERDRQVALIWIAELAGQL
                     MTLQAA"
     CDS             complement(10593..10913)
                     /codon_start=1
                     /product="Phage protein"
                     /label=Phage protein
                     /db_xref="SEED:fig|6666666.356856.peg.18"
                     /translation="MGHKTLKFSHVLEAGAWNMRVLKIECPECGAKAVIRKTNRKHRQI
                     ADIYCACSDVECGYTFVMNLTFSHTLSPSAKTGDQLLQAVLNNLKPEQRQMALDLLKTA
                     AA"
     CDS             complement(10913..11962)
                     /codon_start=1
                     /product="Phage portal protein"
                     /label=Phage portal protein
                     /db_xref="SEED:fig|6666666.356856.peg.19"
                     /translation="METEKSSMKRTSHRRQKAQNAPRKKMSIITFGKPEPVLTTGTDYR
                     DVWYDNEFNHYTLPIDRLALAQLVNLNGQHGGILYARRNMVASDYQGGGLSHDDMLAAA
                     FDYLTFGDIAILKVRNGWGEVIALTPLPALYTRIRKTGEFAVLQKGEPLVYPPEDVIFI
                     KMYDPQQQIYGLPDYIGGIHSALLNSEAVIFRRRYYHNGAHTGGILYTSDPNMTDEIEE
                     EIERQLASSKGIGNFSTILVNIPNGDKEGVQFIQMGDISAKDEFANVKNISAQDVLNAH
                     RFPAGLCGIIPQNAAGLGDPEKARNTYRKDEVIPIQRRFMASINKDPEIPQNLHLIFDF
                     GDDTTIQGA"
     CDS             complement(11938..13713)
                     /codon_start=1
                     /product="Phage terminase, ATPase subunit"
                     /label=Phage terminase, ATPase subunit
                     /db_xref="SEED:fig|6666666.356856.peg.20"
                     /translation="MAKYSDELIGVARLLYLKRATPKEIAADLNLPNARIIYYWAQKFG
                     WADLLNAESTEEAIERRYQLLAGRDKKTELELQEMDMLIAHAVKLRAQSNKHKEKLAAA
                     GHGNSPGPRGNDDDERPAKKRQYRKNDISSLTKEDFDAWANEHLFGYQKHLRLNIGQQV
                     RNILKSRQIGATWYFAFEAFENAVLTGEPQIFLSASRAQAEVFRSYIVNIAQQYFDITL
                     TGNPIRLSNGAELRFLSTNKNTAQSYSGHLYCDEYFWVPNFARLNEVASAMATHDKWRT
                     TYFSTPSAKTHQAYPFWTGEEWKRGNKKRAGVNFPGFDELRDGGRLCPDGQWRYVITME
                     DAILGGFNLASLEKLRNRYNVDTFNMLYMCVFVDNKDAVFSFDDLERCGVDPATWQDHD
                     PTAPRPFGNREVWGGYDPARSGDLSTFVIVAPPIYDGEKFRVLLVVNWHGMNFRYQANQ
                     IKKLFQRYHFTYIGIDVTGIGAGVFENIQHFAMRQATAIRYGVETKNRLVMKAADVVES
                     QRIEWDQDEKAISASFMAIRRTTTASGNAMTFIADRSAETGHAEAFFAIAHALDNEPLN
                     YENKPQSRWRLKKAA"
     CDS             13723..13869
                     /codon_start=1
                     /product="hypothetical protein"
                     /label=hypothetical protein
                     /db_xref="SEED:fig|6666666.356856.peg.21"
                     /translation="MRRGFYFMTCVYFAMFVKESLSEWRRIKPVAVLFLFRNNAVVRQE
                     RSM"
     CDS             13870..14706
                     /codon_start=1
                     /product="Phage capsid scaffolding protein # Fam Scf032"
                     /label=Phage capsid scaffolding protein # Fam Scf032
                     /db_xref="SEED:fig|6666666.356856.peg.22"
                     /translation="MSQLMTNWICIATEGETVDKRVMERQWLIDAAETYDPQLYTALIW
                     PEHETWFGNMGEVLALKTETGDDGLLRLFAQLRPNHQLLQANRDGQLLFCSVELTPDGN
                     FRGTGKTYLEGLGVTNTPASVGTTRLRFSSKKRGRLFGALKPLVIDEVKEIKGNSMASK
                     SWHSLFGIKPKAFAEGEGESNDAGGDDKLQALAEALAELESRVTALESQQSQTTDAVEA
                     VQEDMDTVKEVVDTEDFATLRNNLPKILNNFGKLDRSITKLPQRQVGNKPKGFNFL"
     CDS             14761..15792
                     /codon_start=1
                     /product="Phage major capsid protein #Fam0066"
                     /label=Phage major capsid protein #Fam0066
                     /db_xref="SEED:fig|6666666.356856.peg.23"
                     /translation="MFLNQRAREYLSAYSVGLAQEYGVSDTARYFALTDPKETQLRAAL
                     LERVDFLSMINVLDVDQLSGQVVSVGSSALHTGRKEGGRFIRQVGVDGNDYKLVETDSC
                     AALPWDLLSVWANAGGEDEFFQLVQAFSNEAFALDMLRIGFNGTHVAKSTDPDENPNGE
                     DVNIGWHQRMKGFKDGQQIITDRVVLDEGGDYTSLDAMASDLINAKIPQQYRNDPRLVV
                     LVGADLVAAEQYRLFQKADRPTEKIAAQMLDSTIAGRPAMVPPFMPGKRMTVTTLSNLH
                     IYTQRNTRQRKAEFVEDRKQFENKYLRNEGYAVEYPELYASFDESAVTVGTVAEPTEKP
                     AGA"
     CDS             15832..16497
                     /codon_start=1
                     /product="Phage terminase, endonuclease subunit"
                     /label=Phage terminase, endonuclease subunit
                     /db_xref="SEED:fig|6666666.356856.peg.24"
                     /translation="MYAEQQLSRCQAVSGDHSLHVQLRALENDVARLRSQPTLRDRVEM
                     KRRELLPRWLPTVQRYLDSGEVYQNKVFAYCVVWLFDVEEFDQGLAWADIAIAQGQCTP
                     DNIRRTFAAFIADTVLAWAQQTADMGQSVEPYFSRTFKNVAENWRLHEEITAKWFKFAG
                     LLLLRDEQGQPRATAAADIDTLKAADALLHQAEQFYRQVGVGTMRRNIAARIRALQKE"
     CDS             16594..17046
                     /codon_start=1
                     /product="phage head completion protein (GPL)"
                     /label=phage head completion protein
                     /db_xref="SEED:fig|6666666.356856.peg.25"
                     /translation="MFSGTPVDYQDEQLANNGFWPDLNVRDFQSQRTIPADLDADTVAQ
                     ALLAAVGEVNADLADVEARNRAKGFARAQDVPGVSLKGQNVLCAQYQKAVFARAKADLL
                     GEFATIGRRESHPGQEGDDTRKGLLGEAAMVIRRMKGLKRATVRMV"
     CDS             17043..17540
                     /codon_start=1
                     /product="hypothetical protein"
                     /label=hypothetical protein
                     /db_xref="SEED:fig|6666666.356856.peg.26"
                     /translation="MSKLDDLTTFVSKHLPPRVMQGFDSFMDEVSFIPARRDLGEDQYQ
                     LAVMRFDAVLSWERWPYRVCDPRNLCALLLVWQEGQDDVPYMDAGLDMELPTLDVDVRD
                     QDSAIVVVSLQLAESLAIVADDDGIIPFDGRRWRLTSPEIWQVTSGHLFGAGGDGAEVG
                     AS"
     CDS             17537..18241
                     /codon_start=1
                     /product="hypothetical protein"
                     /label=hypothetical protein
                     /db_xref="SEED:fig|6666666.356856.peg.27"
                     /translation="MIVHGELSQSQLAELRTALQRLTLPPKKRQRLLWRLAKYGVIAAA
                     KRNVRAQQAPDGSAWTARRGRRRGRMLRNLPNLLHIREMPEIQAVRIYLKGGAYRNGKT
                     PVPAGVVGYSQQNGMSVSVKRSQVGNGRPEPGRMATRRQARKLRALGYRVKRGARWKKP
                     PYREIEEILSFAQAGLLIRKLSGKAAKTAWTVDVPARPFLGMNDAEFTKALARQLQGIG
                     FGWDVKAQDIKG"
     CDS             18244..19359
                     /codon_start=1
                     /product="Conserved hypothetical phage protein"
                     /label=Conserved hypothetical phage protein
                     /db_xref="SEED:fig|6666666.356856.peg.28"
                     /translation="MSWPTVQVNQVNQLQGETSEIERVVLFIGEGSVDAVKTVPVNTQS
                     DLDQVLGAADSVLKRDVSAAMVNAGQNWSAFVCLLPPKGDWVSAVTAAQLVASVEGVVV
                     SLPASKNSIAQAASLRSALVSKFGRWVWFLLAVDGPKEGEGWDKYLQSLSNLQNGAAAP
                     AVQLVPRLWGNEPGVLAGRLCNRAVTIADSPARVQTGALLAMGRTDLPVDGTGVMLDLA
                     MLQALEKQRYSVPMWYPDYDGYYWSDGRTLDVEGGDYQAIENLRVVDKVARRIRLQAIA
                     KIADRSLNSTPGSIAAHQGYFAKTLREMSRSTQINGITFPGEVKPPKDGDVVIAWRSKT
                     AVEIYLVVRTYECPKGITVSLVLDMSLEDSA"
     CDS             19356..19811
                     /codon_start=1
                     /product="hypothetical protein"
                     /label=hypothetical protein
                     /db_xref="SEED:fig|6666666.356856.peg.29"
                     /translation="MTKRISGQSFDFNMDGALVHAEKVSLSITDNTAAAQTQGIPDGWV
                     AGDVAAEGEMELSTKSLAVVTAKASSAGSWRGIEPVDLMWYAKAGSEEMKVEAFGCKLI
                     LSDILDVDPKGGSVMSHKIKFVVTSPDFVRINGIPYLESELTEKLIG"
     CDS             19820..20125
                     /codon_start=1
                     /product="Phage holin # possibly family II"
                     /label=Phage holin # possibly family II
                     /db_xref="SEED:fig|6666666.356856.peg.30"
                     /translation="MQEYEKNALGLLVLGALIALGKLLASDEKITPRLFFGRMILGSAT
                     SMAAGAALVWVPGLSSMAVTGLGAALGVAGHQAVEIWLRRRGSGLLKGSDAKDDVK"
     CDS             20112..20453
                     /codon_start=1
                     /product="Phage protein"
                     /label=Phage protein
                     /db_xref="SEED:fig|6666666.356856.peg.31"
                     /translation="MTLSEKQQLFTQLVAQLIQWAGERGYRLTFGEAYRTPEQAKLNAR
                     NGSGIANSLHTQRLAVDLNLFINGEYQTRTEAYLPLGEYWELLGGCWGGRFTSRPDGNH
                     FSLEHNGVR"
     CDS             20453..20809
                     /codon_start=1
                     /product="hypothetical protein"
                     /label=hypothetical protein
                     /db_xref="SEED:fig|6666666.356856.peg.32"
                     /translation="MDGLWRIVAGVAVAFVAGWKAASWQRDSVDLAVTRAATAAAEQSR
                     QALQALASQSGAALESKLEALRNVPNKTVYREIVKPVFTNVCLSAEFVSLYNDAVNNTE
                     RVLSGKPEKEMPGH"
     CDS             20766..20945
                     /codon_start=1
                     /product="hypothetical protein"
                     /label=hypothetical protein
                     /db_xref="SEED:fig|6666666.356856.peg.33"
                     /translation="MSYQENLKKKCPVTNLPRLSGTTGNDAAQPLISWPQIYADCAARH
                     NQLIDEITQRENMQ"
     CDS             20942..21199
                     /codon_start=1
                     /product="Phage protein"
                     /label=Phage protein
                     /db_xref="SEED:fig|6666666.356856.peg.34"
                     /translation="MSKVTLSVSGKELSFEPNTVAYNGMINDMAMDNKVAPAVTYLRRI
                     VVAKDKETLDELLKLPGAALQITEAVNAQYAPKLDIEVKN"
     CDS             complement(21261..21395)
                     /codon_start=1
                     /product="hypothetical protein"
                     /label=hypothetical protein
                     /db_xref="SEED:fig|6666666.356856.peg.35"
                     /translation="MLHESPFNASAIPFATEIRIFSQCVFASQTARARLSVSSFSAGK"
     CDS             21387..23351
                     /codon_start=1
                     /product="Phage-related tail protein"
                     /label=Phage-related tail protein
                     /db_xref="SEED:fig|6666666.356856.peg.36"
                     /translation="MKQLDFTLSLIDKLTRPVKQAQAAVTGFAKSSRDAFSKIAVGGAG
                     LIGTAMSIQGALGPAVEMHGAMVEASARGVDDSALQKINANALKFSTQYGRSALEYVQS
                     TARINAAVGTLTKEDLPGVVRASNVMAAALKATADESSEFMGQMFANFRSDAESMGNVQ
                     FAEQLASKAAYMRNAFGVELGAIKDLMEGARGVGTNYGIGMDEQLAVMGELQRTLGTEA
                     SSSYEGFLSGAVKGAKKLGLSFEDANGKLLTMPAMLEKLRGKYGASIEGNLKAQSDLDD
                     AFGDSAAVIKQLYGNVGALQRHITELGSSDGMKRATEMAQKMASPWERLTAIWYAIRAA
                     MGATLLPVLYPLINKMADGGQVLVKWLNLFPNITRVIGYCVLAVLSLAGAGAIANIVMG
                     VSVFVLGGLKGLWKGLTAIMKIHVGVIWLYNKAVLAWAATMRILRGVLLAVRMASLLTG
                     VAFNIALWPVLLIIGAVALLVAGCYLLIKHWDGIKNAITQTDMWKTVTEKVQWVAEIFG
                     QAWQGIVDGWNRVVNAMGNFSLSETMGKMVDGVGEIFSGLWDGILASFNASYRWIIEKL
                     NAIPGINIAMPESVPRPGGDGLLTGGKIKGIDSGGLQQDISNSNAKNYTDNSRKVENLT
                     IYANKGFTPEQLTEWEALR"
     CDS             23333..23680
                     /codon_start=1
                     /product="Phage protein"
                     /label=Phage protein
                     /db_xref="SEED:fig|6666666.356856.peg.37"
                     /translation="MGSTAVMDDVKYIDLLITERDFSLNAGREPIFCNNRISIGQDCVH
                     AIIESGLTTKLVAERSPTLRADVLTQMIILVEDDERIIPGTVVVSEESPTRLWVTAETY
                     DFGPITARVDV"
     CDS             23677..24861
                     /codon_start=1
                     /product="Putative bacteriophage protein"
                     /label=Putative bacteriophage protein
                     /db_xref="SEED:fig|6666666.356856.peg.38"
                     /translation="MTEKPKIDYEQALKEAGMPVTAETVTEQFQAQVTASGLVTNTSRM
                     SPFWRLISVMVTTPVIWLKDVLISVVLANMYLATASGPFLNLFAWGVNLSRKAATAATG
                     VIRFYKSDAAQAVVIPAGTLIQTERINGTIFSVAVSADTVITAGQASADVPVIATAEGG
                     AFNLAPGYYRILPVGVAGIERVENQEDWLLTPGADEESDDDLRERCRNQFNLVGNYHTD
                     AVYRSMIAAVAGLSIDRIFFLHDAPRGPGTANAYLLLDSGVVSQPFIDAVNDYITAQGH
                     HGHGDDLRCVALPETQHDLTITVYVRNLVNMTDEALAALRTGCQDLVRCAFRENTGYGV
                     EKTWPWSRFSFSTLAQELHDAFPLIASLDFSLGDIVSGLSVPRLASLTVVIADA"
     CDS             24854..25486
                     /codon_start=1
                     /product="Phage protein"
                     /label=Phage protein
                     /db_xref="SEED:fig|6666666.356856.peg.39"
                     /translation="MPDFKGQLAGLRLPSWMDKGEPAGLLNASKAYWLQVNDWLRWPLQ
                     QLDVDTCAEPLLNVLAYQRDISRLKGEALDLFRRRVKYAFVNAQDAGSVAGFIAIFERL
                     GIGTVTLAERQPGYDWDVILVRINDEQLSGYNALMMSLVRQYGRTCRRYTFDLSNGETQ
                     SVRGGEFEHNAEYYHAISLMPVGTVTARVALRYARASASTEYYSANV"
     CDS             25495..26916
                     /codon_start=1
                     /product="alternative bacteriophage tail fiber C-terminus"
                     /label=alternative bacteriophage tail fiber C-terminus
                     /db_xref="SEED:fig|6666666.356856.peg.40"
                     /translation="MAQSVITHAFETWNVQRVLDGVAARPDKVVFARIPGQDESVPVDR
                     NEGLPPADQIQHIATITQAGVLNENAVVYSVVLDTTVGDWDYNWIGLLDSQTNTVLMIV
                     HVRTQQKLATRNGQQGNSLTRNLMMQFDGAAAATQINVTADTWQIDFSARLAGIDERIR
                     IENMDRYGSSAFFGNAYQVVKDGNAYVVKAGVAYAAGLRTSLSSDLKITVDALPTRVFL
                     NVCWRGEFTQAWAVDSQIVVANSADHEIRDGVQHYLLPVADIDENGNITDWRKQGSLAE
                     QNAQTLYLRKDDNLAALRDKEASRKNLGLGQLAVMDTDTARQTLRITQLENELVGIPLP
                     YPGATAPDGWLKCNGQSFNKSMYPLLAGRYPSGFLPDLRGEFIRGWDDGRGVDVGRGLL
                     SAQTQAIQDHRHVGTMVNSNPLQTGMNTGIGLLSQYTPTPTVGYSNEISSGGTVDGSIE
                     TRPRNIAFNYIVRAA"
     CDS             26916..27536
                     /codon_start=1
                     /product="Tail fiber assembly protein"
                     /label=Tail fiber assembly protein
                     /db_xref="SEED:fig|6666666.356856.peg.41"
                     /translation="MRNNSVMANETTLDENGHAVSSGWITVYHVDASTREYLGNSQEYL
                     LVGTGIPADSYADTPELPGTGQALCRTTDGQQWEYVPDYRGVTAYHTETREPFTVASLG
                     ELPAFATLQAPSSEFDVWSGKEWVTDKDVQKQAEIIAAQRDQGLRLETATTRIQMLGDA
                     VELNMATDDEVAALNAWKAYRVLLNRVDVNAAPDIDWPEAPAV"
     CDS             27533..28258
                     /codon_start=1
                     /product="Phage protein"
                     /label=Phage protein
                     /db_xref="SEED:fig|6666666.356856.peg.42"
                     /translation="MTWRRADICLTSALPPVTCSVLPVHPWVYGVGNVTDSGHYLSPVN
                     AVTYLADKLGAAADNVAVCVWMVCGNGLGEFLQALDALTVVFPAPVLSQVARQARAMAE
                     LSTVKMQLPAKSRTLPAAALLSVASCRQALNAQRMSVAQQQATAPMGLDALKGMAERFA
                     SQREAALSEISQAMQQMAQRSAPAWVFTGQGAPGVIAAEMLKNIPQPSAIYTAAMMFTG
                     TELDALESMIREPDNYARP"
     CDS             28302..28757
                     /codon_start=1
                     /product="Phage protein"
                     /label=Phage protein
                     /db_xref="SEED:fig|6666666.356856.peg.43"
                     /translation="MQFEEKDQSGQTSSTANAEQGIKPKELRVSGVIPFTEAKVLTRLF
                     ALAEAKEGNKLKRYRVANPTAQAINFRLATFTGSIDAPKQDGKQAWLVTFTLREHISVS
                     EKRDARAGNQTETKKQAPGKGSDAGESDEQLSWFERKVLKPVNDALG"
     CDS             28782..30413
                     /codon_start=1
                     /product="Hypothetical bacteriophage protein"
                     /label=Hypothetical bacteriophage protein
                     /db_xref="SEED:fig|6666666.356856.peg.44"
                     /translation="MLSGDAVHAVDVNMVLELNACGRGFITAETQQDYTGKLVRLDVGY
                     TDLVLRWFTGYVERSQPAENGYQRLFVRELAGVFDRMWPCAFQHPTLRQLADWLSEHSG
                     LTVHLPDAGYVSQPIPHFTHSGSGHQLLANIGAAFGIDDYVWQPLPDGALYLGSWADSL
                     LAGAPVTIPAEFSQAQAAGNSMTLPLIQSVRPGAVVNQQRLSRVQLLNENMTIEWVPVS
                     TVTGRAAQRSPAQRQIDTAYPELSAGLHLPKFARVEAPSEAASSGNIADPFRPRYAVDL
                     QLLDADGKPAKDTPVYPAVPLPVPMAGSEAGLFQFPPPGTLVEVGFTGGRPDKPFVRQT
                     VASGQSLPDIKPGEQLQQQRAEVSQRVTVAGDWERKTDQAIRESSMHREVSADEELRTL
                     VTRETLIKATDNATVLGTHTLQAGAIVQIAQGDYSLATQAGYTADVGQSVTVEVGQSLT
                     EKIGQLRRSIAGARQELVAPVVWVGSQQVNVMTLMLDTLDVIQELATQTASHTHNNTGT
                     PLNAGEIQQTGRRTGTLKDKYSPIIG"
     CDS             complement(30453..30590)
                     /codon_start=1
                     /product="hypothetical protein"
                     /label=hypothetical protein
                     /db_xref="SEED:fig|6666666.356856.peg.45"
                     /translation="MSVHFVGALAASAGYRQRRKVLAWRRGDRERAWLSGPLSASGEGA
                     "
     CDS             30591..30854
                     /codon_start=1
                     /product="hypothetical protein"
                     /label=hypothetical protein
                     /db_xref="SEED:fig|6666666.356856.peg.46"
                     /translation="MTKSALHRTRLRFSDRKDFSVLFFYKTQRQPAPPQGFCGRTSTEN
                     SERNFSVFQLFGSGKDRLKIATIRNKRVLCGFGQFEWISECE"
     CDS             complement(30963..31466)
                     /codon_start=1
                     /product="hypothetical protein"
                     /label=hypothetical protein
                     /db_xref="SEED:fig|6666666.356856.peg.47"
                     /translation="MALTKCKECKKEVSTSAKVCPHCGVKNPSTTAGQAIGGFVVLVLL
                     VWGATKIFGGSDDKPTAKADTPKNCAANDGQCLFDKNWIEAASRCRPLIEKSSKYDFEW
                     TDGMMTPMFSHFRLNEAKKQMTFIGDKVKFTNGFNAKITMTYNCTYDLQGKSIADFGIT
                     EGKL"
     CDS             complement(32054..32536)
                     /codon_start=1
                     /product="tmRNA-binding protein SmpB"
                     /label=tmRNA-binding protein SmpB
                     /db_xref="SEED:fig|6666666.356856.peg.48"
                     /translation="MTKKKAHKPGSATIALNKRARHEYFIEEEIEAGLALQGWEVKSLR
                     AGKANISDSYVLMRDGEAYLFGATFTPLHGASSHVVCDPTRTRKLLLNQRELDSLYGRV
                     NREGYTVVALSLYWKNAWCKVKVGVAKGKKEHDKRDDIKEREWKLDKARIMKNAAR"
ORIGIN
        1 tggtggagct ggggggagtt gaacccccgt ccgaaattcc tacattcctt ctggtaggta
       61 gtaaaaacaa caaattgcaa taaaaacaaa atgttattct gtggtgagtg gtgaggaaaa
      121 ggagtgattg ccattcgctg ccgccaccct gccgccattt tttggcgacc agttcaggcc
      181 gttgagaggg tttttagtga tggcgtcttc cagatggtcg ggcgcgaaat gggcgtagat
      241 catagtcatt ttgatgtcag catggccaag gatatcacgc agcaccagta tattgccgcc
      301 gttcatcatg aagtggctgg cgaaggtgtg gcgcagtacg tgggtacatt gcccatctgg
      361 aagctgaatt cccgtccggt taatggcacg ctcaaaggct ttgcggcagg gagaaaacag
      421 cttgccgctt ttacgtggga tctcatcata cagttcacgg ctgataggaa cggttcggtt
      481 tttcttgccc ttggtgcggg tgtaggtgat gcgataaggc gtgacttgct ggcctgatag
      541 cccttccgct tcgctccagc gcgcgcccgt tgccagacat atctttgtga ctagcaacag
      601 atgcgggtta gcagattcgg cgcacgcatc cagtacgcgc tttatctcat tgggagccag
      661 aaaagccagt tcctgttgcg ctatcttgaa tgttggcaaa ccggataatg ggttgggtgc
      721 atcccagtgg cccagttttt tcagtgtgcc aaaaacggca gataagttgc gttgttccag
      781 attgacagtg cgtggtttga cgacagccag agggatgccg cttgagtcag tcatctgccc
      841 ggctaaacgc agttcgcggt aatgcgcgaa atcggcggcg ctcagttctc tggctttggg
      901 gttgcccaaa ccggtgcaga tgatatcaag tttcgccatc atccttttag ggtcggccag
      961 tgtgcggccg taaagagaaa accacagatc gataatctcc cgtaggctgc ggttatccgc
     1021 tttttcgcca agccagggct tgttttcaat ctcttccatc gtgaagcgct caaatgccag
     1081 cgcctcacct tttgtagcaa actgcttgcg tacccgcttg ccttcacgcc cgaatgggta
     1141 gcactcacac aaccatttcc ctgatgccaa cttacgaaca gccatacacc cccctgtaaa
     1201 ctgagggatg catatttact gtgtataaaa acagtaatca atgtatggat gttgtgagag
     1261 caaacaaaca gcgaaaggtg gccaaggcca ccttagaggt aacggtaaga ctgaggagcg
     1321 gtgatgtttt cacctaatgc actgagttgt agtggtgttt cataaacacg caggtcgccg
     1381 attttgatag cgaaagcctt ttctttgcta ccgaaatact catcgaaaaa atttttactg
     1441 attccggcgt actttttcgt tttgctccag actttagatg gttcatcttc gattactgca
     1501 tcaatatcga attcaccaac gacttttcct accggcattg tggaataaat gacgactgat
     1561 tttacatcag ggtttttaaa aatcccttta cggaattcaa atttctttga accatcgagt
     1621 attttttcga cgaattccgg cttaattgac aataatactt tcattgattt cacctaattc
     1681 tgttattctg tcaaattgat catccgttaa tttcaaaaca ccccaatagt tatttggatt
     1741 taatccgaca tcctgaatga gtttagcacg gtttagccgt tttggtaaag ccagattata
     1801 ggtgaagcta attagataag gatattttct gcttttatag atgccacgta gctcaggctc
     1861 agtaaatatg ctgtaacgtg aacagtattt aatgaattct tcttcattgt caaagctatc
     1921 tattgtttta acttcttcaa caacacataa agatgtagct acagaacgat agtaggctgg
     1981 gccttggtta tcactcgttc tatatatgac gataatgtca tgtgctttca tcaatagtac
     2041 atcctgcatc gcacatatgt aaatctttct gatactgttg gcatacgaca catcagatat
     2101 aatatcgggt gattcagtga cgagctttga gtctgggaag agccgggtgt gaaatgtggg
     2161 gtatatagaa agaagaaatt tacgttcctt atttctattg ttgatatatg gataatcaga
     2221 aagcagatca cctgttagcc cttctgttcc catatctttc accagcacat tctctattcc
     2281 attcaggctg gttttttttc ctacgtttac aaacccatat agctggaata atctgataag
     2341 atagctgtgt ttatcaaaaa ctgtgacata aatatcatcc accttttcag tcagagcatg
     2401 gtcgaatatc ttttttaaga aacgctggcc ccgtaacgtt cctttttggt taaatttgaa
     2461 tgtacccact ttcaagtgtc tatgtgctgt cagttgtggc tcagtatctt ctacattacc
     2521 ttcttctatt ttcagataca tgaaaccatc aatttttttg ttttcatcgt aaagcacata
     2581 tgctttttct tgtggtgagt tacatttttt ttcaaaccac tcaacaaaac catgagagta
     2641 atcagatttt agtgaggtaa aaaaatcatc agaaaaatca acatgattga aaggaatgta
     2701 tttaaggttt tccattttaa ttttccttca ttgtttttta taaaagttaa tctttcttta
     2761 aatacgaaga aatactaata gctatatata taattgatag aaatagaagg ctagagccta
     2821 ttattgaatt atctgctgga atgtatttga tggaaaatga tatagcaagc ccatataata
     2881 tataggctat tatttttcta aattttgttc ttgtgttttt gaatcttgct atagctgaaa
     2941 aatctgtgag tctttctttt ttgttggtgt ctacttttaa tttccagtga taaattatcg
     3001 gagaagaatc accaagagcc tttctgtttt gaaagtattt ttgccatgtt tctttttcaa
     3061 gaattctaca tccttgataa ttctttcctg cagatgagtg ctcgtcactc atgtctctaa
     3121 ttatgaaaaa atgatatttt tgaggagtac acacggcggc cgataaggtt gatgatattc
     3181 cagatggtag gtttctttgt tcatttattc taaagtcaat aatatctgtt ctttcttgat
     3241 tgcttttaag gaaattatcg ccaggaataa atgttctaac tatctctttt atttcgtttt
     3301 tatctataaa tattctaaat cttatatagt gttggtgttc actttcacga gaaatacatt
     3361 cttttatttt taatataata attgttccat catctctttc tgtaagtgtt agcctgttat
     3421 cgaatgtccc cgaatcagaa tctaactttg tgttcattat aatcgcttct ttgtttgtaa
     3481 gatgtatttt tgtaaaagcg ttaccaatac tttctttttt atttagatat tcgttaaata
     3541 ctgctgtaat taagtcatca ttttcattca gataagaact aagatcattt atttcacttt
     3601 tctttttctt aaaagggatg tatatacata tggctccctt ctctgatatt tcatcaacct
     3661 ctggtttttt gaacagaatt ccaaaatcaa tgcaatataa tttctttgaa tttatattcc
     3721 aaaaattaat gtgcaagtcg tctatgaatg gatcattgat atcttcttca tggttacttc
     3781 cagagtagtc tctacatccc catatggcta aacttcgtga cataattatc tccatcttga
     3841 atgattaatt ttaatttccc tagtaatgaa agttgatata ttatatttag atgtttttac
     3901 agcaaatcat tattatcttc atcaggactg atatatctcc cagcccacaa tcaaactctg
     3961 ccccagcccc gctaacacgt acttttccta ctggtatacg ggtcagatct ctgatgctgg
     4021 ttcggccttc aatttcaacc agccacttac catcaaccac ctcgtcaaac tggcgatcgg
     4081 caatgtaggt tatgtttcca tccagaatga caaccgggtc tttcagtcca tcgggcagaa
     4141 aagccttatc gaacatatag tagtttgaat cgtagagttt tccatcgatt agcttttgcc
     4201 ttggtatagc gatcacgtca tttctggcgt catcaaactt tgggccttca cctgtagcga
     4261 gccagcgtaa agatacgccg gtttctaaag ccgcctgaat gacccaatca gcaggaaaag
     4321 agtcacgcat gtatctatta gctaaagtgc tttttgatac accgagatgg tcacatagag
     4381 cctgacgatt cttaaaacca tacgcctcga caagacgctc aatcgctgct tttgcaccag
     4441 tccccaaatt cataaagttc accaaatgta tacttttagt ttgactaaaa ctaaaagtga
     4501 tcgtaaattc cgtgtgtaca caaaaagtgg actaatcaca gttcacaacg gctcaccaca
     4561 agccaatagg gaatgttgca ttatgagacc tcaaatatca atcaccctgg ccgtgccgtc
     4621 tgtctcgatt gagaaataca gcgagctgac cggcctttct atcgacacca tcaacgacat
     4681 gctggctgat ggtcgcttaa ctcgtcaccg cctgcgcaaa gataaaaagc gtgaaaaggt
     4741 gatgatcaac atcgccgcta tgacggttga tgcgctcgca gattgtgata tttcgctcaa
     4801 ttagtttgat attgagattt ttggagttca caaaccatgt ttgattacca gatcgctaaa
     4861 cagatgcact ttgatgaagc ctgtcgtgcc ttttcacttc gccacaatct ggcggagctg
     4921 gcgcgcatgg cggggatgaa tcagcaaatc ctgcgtaaca agctgaattc agaccagccc
     4981 cacaagctga cctgtgaaga attgctgacg ctgaccgaca tcaccgagga tgccacgctg
     5041 atcgatgggc ttttggcgca actgaactgt ctgccagcgg tgccagtgaa tgaggccaga
     5101 gcagagcggc ttaccgccta tgtgctgcaa gccactgccg cagtaggaaa ggtagccgcc
     5161 gagagcgtat cagatgagcg tatgacgcag acgcgacgcc atagcctaat gagcaccatc
     5221 agcgacgggg tgcgttacct gtcgctgatt ggcctgacgg tgcagtctcg cattcaggct
     5281 aacccggcaa tggcgtcaac gctggatgct ctgagcgggt taggcgcatc gctgacaatc
     5341 ggataataac aacactaggg aaaccacgcg ccgggcgtgg tgaaacatcc cggcacctat
     5401 ttgcaaccgt ctatctgtgg gcggttacca ataggaggaa caatgcaaaa gccgatctca
     5461 attgcccctt tcctgcggaa taaccaggcc ggggcatcgc ttcccgtaga ggtgcgtcat
     5521 ggcaaaggca agcagggcat tattattcgg ccagatggcc gccgatggag tccaccgaaa
     5581 ggggcgttta accggtaatc aggagggaat atgtctcaat ctgtcgatca tcagaaatgg
     5641 atacagcgtt gccgggatat cgtgtttaaa ggtgaatccc gcgctcagtc attttgggaa
     5701 cgtgctgcac tggatacccg tgaaattatc ctgttttctg caaaaccaaa gctgaaatcg
     5761 cgccatgtta attactcatg gcatcagttt acggcggaag aacgtgccgc tatttggggg
     5821 gcaattaagc gcatccggtc tatttgcgat gaaaccgcgc tatttggccc ggatgatttt
     5881 ttgaaaaccc gtaatcaaaa cggcgcaagc aatacgccga acccgtcacc cattcattaa
     5941 ttaatccata gcaacgaata aatgcccttt atcgggcagg gattcgtatt acctgaaaaa
     6001 aggaaaccgt aatgattgca accaaattaa ggcccatgaa tgccgccgct gatggcgcac
     6061 tgatcgaact gctgaataaa gcccgccggg aggagcgcaa agagcagcat ttttccttct
     6121 cactgcgcct tgctgcgctg gctgtccgtg ctcaacaacg tgacctctcc gccgccgaag
     6181 tggtggaact gatccgccag gaatcggaac gttttgagca ttccgctcag gagcttatct
     6241 aatggatatg ccacaaaacc ccgcttataa ccgtgtggat atcaatgggc gttatgcgat
     6301 tgcgaaagtg ggttatgact ttgcgctggg ggaagtgcaa tgcgataacc gggacggcgc
     6361 acagccttat ctgtccaccc tcgcggtata ccaaacgccg attacgctgg tgaatgattt
     6421 tgtacatcgg tcgctctgcg ctgaaattcg gcgcggaacg gttactgaca tcaccaccat
     6481 gctgaccgaa gcagagcgcc tttccctgct gtgcctgaat gcctttgaac agttagaaaa
     6541 tactggaacc gggttaagtg aatgaacccg gaacacaatg gcgcttatca cgtcgtcaat
     6601 cagtggcgac gtgagcagtt cacccgcaac gaaccggacg gcttaaccta tgttgagcgt
     6661 agtctatggc accttaaccc gctggatcac cagtggcgtc agcagtatct ggccggaatg
     6721 ccggactatc tggcgaagta tttcggccag cgttatgaaa agctgtttac atccgatgag
     6781 cacaagggcc gccgccgggc caatacgttt ttactccgta ccctggggaa aagcgtattg
     6841 ccacgcctgc gcaccgttac cgaacgatac cagacgcaac agcgtgcggc gggagatctg
     6901 ccgttcccgt tcggtgatga tctggaaaag ctgccggttt atgaccgtga caacatccgt
     6961 gccctgtcac agcaggtggc cgactttatg gctgcatcgt tgcgcgacta caccgaaaac
     7021 cgcatcagga acactgggga actaacagac aggtacatca ccttgctgtc attccgtcac
     7081 cttggcctgc tgaccttaca ggccggaaca cagccgccgt actgggcgca attcaccaag
     7141 ggccgccgcc cgttatccac cgagaaagcc gaatctggct tgttacgcat gatgtcgcct
     7201 gaatggtggc gggcgcgatt aaaacgccgc cgtgatatcc agcgtgagca tatggctatc
     7261 gcggtcggcc aggtgcaaaa ggcggcgtca ccctatgttt cccgctctac gctggatgaa
     7321 tggaaagagc agaaacggcg taaccgggag tttttcaagg cgtttgaact ggaggacgaa
     7381 gagggaaacc gcgtctctct ggacgacaaa gttaacgcca gcaatgctaa cccggcgatc
     7441 cgccgctgtg agctgatggt gagaatgcgc ggctttgagg atttggcgca ggaaatgggc
     7501 tgcgccggag agttttacac tattaccgcg ccgtcacggt atcacgcagt acacagcggt
     7561 ggtgggttcg ttgaacagtg gagtggtgcc agccctcgcg acacacagaa atatctgtgc
     7621 ggtgtgtggg cgcgtatccg ggcggaactg tcacgcgaag agattagcgt gtttggtttc
     7681 cgggtcgtcg agccacatca tgacggcacg ccgcactggc atttattgct attcatgcgc
     7741 cctgagcaca tcgaacaggt gcgcgacatt atggcgtatc acgcccgccg ggaagatgcc
     7801 gatgagctga acagcgaaaa ggcgcaaaaa gcccgcttcc actatgagcc gattgacccg
     7861 gaaaaaggca gcgccacggg ttatatcgcc aagtacatca gcaagaatat tgatggctac
     7921 gcactggatg gcgaggccga tgaagaaacc ggggaaaacc tgcgcgacat ggcaaaggcg
     7981 gtatcggcct gggcatcgcg ctggcgtatc cggcagtttc agcaaatcgg cggcgcgccg
     8041 gtgacggttt accgcgagtt gcgtcgcctg ggtgataagc aactggataa cgcggcgatg
     8101 gatgcggtac tggcggcggc agatgtaggc gactgggcgg catacacaca ggcgcagggc
     8161 gggccgttag tctcgcgtga tgcgttggtg gtgcgcctgt cctatgaagt gaccgagcgt
     8221 gccaatcaat acgccgaaga cgtgcaaaag gttcaggggg tgtactcgcc attattgggg
     8281 gcgcactccg ctatcatcac ccgaacggtg gaatggaaga ttgtcccgaa actggccgcc
     8341 gcgtcagcgg gggccggggt ttctggcggc cccgccgccg cttggagttc tgtcaataac
     8401 tgtacgccgg gccttcggcg acgattatcg gaactgttgc acttgagagg ttttccgcct
     8461 gatccggggc tggttgatgt gctcatacgg ggcggtaatc tggcaatgag tgagggcagg
     8521 acgctgaaaa tggtcaacgg caggttggag gaagtacgcc agacgggaga ctgcgagctt
     8581 tgggcggggt ggaactggga ggcgtttcct gaccatattg acaatttatc cttaacagaa
     8641 ttcacagttt aaaatttttc ccctatactg tttttatata cagtattcat ggcaaaaatc
     8701 tgagatacat gccatgctgg atagagttgt agctggttac acagcaaaca gccgaagggg
     8761 ttatcaagag aatgagtgta aaactttgag tgctgggata gtgagaaagg acgtgtcgaa
     8821 agatagtaca tcttttgttg ttttttctgc ttacgcttct aaaaaaggtg gttttttgtt
     8881 gtgtgaccaa agcgagaatt gtttattaaa cagtttgttt cggcagaata ttggtaaatg
     8941 tatttgatag ttaatgattt ttttttattg ttttgtttca attagcggca tataatgcgc
     9001 gcgctttttg attgacgcca tttaccactt aagttagcgt atatcaagag aaacgtgcat
     9061 tataaaactg catggaatta ggagggggag atgtatagtt cagagcaact agcgaacaag
     9121 ttcatagaac ttggtatctc tacaggtaac ttcgttactc ctatgaaagc gcaaaagtta
     9181 acctacattg cacatgggat ttctttgggg catagcgggg caggactact ggatgagccg
     9241 gtttgtgcgt ggcgatatgg ccctgttttg ccgtctctgt accatgcatt gaagcattat
     9301 ggaggcggag ttattaccaa ggctgtgcca gattccagct tttttattcc gtctgctgat
     9361 atagaggctt ataccaacag tgttgtgaag ctcgtttatg atacttatgg ccgttatagt
     9421 ggggagacat tgtcggagtt cacccaccgt aatggaacgc cgtggcatca aacatacgct
     9481 gcagggaagt caataataga tgatcagctt atcgctagtt attatcagcg cttaatgtct
     9541 aaagatccat cttgcatagg cctttgataa tatctaacat aaatcccgtt aatgtaacgg
     9601 gattttttta tgtccaaatc cagtcagtcg agagttctat ctgaagatgt acaagcaaca
     9661 gaaagcacga taacaggcgt ggtggatttg aattcccttc attttcaaga tcttccttct
     9721 ttgggagatt tgcctgagcc acctccacct atacagggac catctcaaaa agcaagtaat
     9781 cgcgaaggtg attgtgaaga atcaaccacg gatgaaatgc agaatgcatg gcttgctagt
     9841 ttaaatggac gtattcgtta tcttgaggct agggctcaag ccgcagtaaa acatgctgag
     9901 gctgatggca cattaactga taatgcctta cgaaaagata tggctgataa gacgttctct
     9961 tttatggagc gttggtgcat ttttgtaggg ttagttattt ttatttatat tgcgaaacat
    10021 gatggtgatc ccccgaaaga agtgatttta gctttgttgg gaacatgtac catcagtatt
    10081 attgggttgg ttggttttgt tgtaagtggg ctatttaaat cttctaaaaa agaataaaaa
    10141 tgtattttat gtctacacag catgaatcag cgtgatgcga aaagattttc caactccata
    10201 agcccgccag ttcaggtggg cttttttatg tcattaagac acctaaaacc cataacaaaa
    10261 tgtaggaacg actggcaata ttgccctact gtggccgtag tggaattgag aacaaggctc
    10321 aatgtccgtt ggctgatgag aaaaacggaa ccgctaatag tttgttagct tcgtatttat
    10381 attttgaaat atattgttac gtaggcgcta ttagctgtag gagatgacca atggataggg
    10441 agtttgaaca gtcactgatt gttgagcgga ttgctttttt ggccaaaaac gcggggatgg
    10501 acggtaatga cgaacgggac aggcaagttg cgctgatttg gattgcggaa ctggcggggc
    10561 aattgatgac gttacaagcc gcgtaatgcg gcttaggcgg cagcggtttt caacaggtct
    10621 aatgccattt gtcgctgttc gggtttcagg ttattcaaca ccgcttgcag cagctgatcg
    10681 ccggttttgg cgctggggct gagtgtgtgg gaaaaggtca gattcatcac aaaggtatag
    10741 ccgcattcca catctgaaca ggcacagtaa atgtctgcaa tctgtcggtg tttgcggttc
    10801 gttttgcgga taacggcttt tgcgccgcac tccgggcatt caatctttaa tacccgcata
    10861 ttccatgctc cggcctctaa aacatggcta aattttagcg ttttatgccc cattacgcac
    10921 cctgaatcgt tgtatcatcg ccaaaatcaa agattaaatg cagattttgc ggtatttcgg
    10981 ggtctttatt gatggaagcc ataaaacgac gctgaattgg gatcacctcg tctttgcggt
    11041 acgtgtttcg cgctttttcc gggtcgccca gtccggcagc gttttgcggg atgatgccgc
    11101 acaggccagc cgggaaacgg tgcgcattca gcacatcctg ggcgctgatg tttttcacat
    11161 tggcgaattc gtcttttgcg ctgatatcac ccatttgaat aaattgcacc ccctctttgt
    11221 cgccattcgg gatgttcacc aaaatagtgg agaagttgcc gatccccttg ctgctggcta
    11281 actggcgctc gatttcttcc tcgatctcgt cggtcatgtt cgggtcgctg gtgtagagaa
    11341 taccgccggt gtgtgcgccg ttatggtagt aacgacgccg aaaaatcacc gcctcactgt
    11401 tcagcaaggc cgagtgaata ccgccgatgt aatccggcag gccgtaaatc tgctgttgcg
    11461 ggtcgtacat cttgatgaaa atcacgtctt ctggcgggta aaccagtggt tcccctttct
    11521 gcaataccgc aaactccccg gttttacgga tgcgggtata cagcgcgggc agtggtgtca
    11581 gggcgatcac ctctccccag ccattgcgca ctttcaaaat ggcgatatca ccaaaggtca
    11641 ggtagtcgaa cgcggcggcc agcatgtcat cgtgggacag gccaccaccc tgataatccg
    11701 acgccaccat attacggcgg gcatagagga tgccgccgtg ctggccgttc aggttgacca
    11761 gttgagccag ggcgagccga tctatcggca gggtgtagtg attaaactca ttgtcatacc
    11821 acacatcacg gtaatcggtg ccggtggtca ataccggttc cggcttgccg aaggtgatga
    11881 tactcatctt tttacgcggg gcgttttgcg ccttctgacg gcggtgtgat gtccttttca
    11941 tgctgctttt ttcagtctcc atcgggattg gggtttgttt tcatagttca gcggctcgtt
    12001 atccagcgcg tgtgcgatag cgaagaacgc ttccgcatgg ccggtttccg cgctgcgatc
    12061 ggcaatgaac gtcatggcgt tgccgctggc cgtagtggtg cgtcgtatcg ccataaatga
    12121 cgctgagata gccttttcat cctgatccca ctcaatacgc tggctttcca ccacgtcagc
    12181 cgctttcatc accagccgat ttttggtttc cacgccgtag cggatagccg ttgcctgcct
    12241 catggcaaag tgctggatgt tctcaaatac cccggcaccg atgccggtca catcaatgcc
    12301 gatataggta aagtggtaac gctggaacag ctttttgatc tggtttgcct gataacgaaa
    12361 gttcatgccg tgccagttga cgaccagcaa aacgcggaat ttctcgccgt cgtaaatggg
    12421 cggggcaaca atcacaaacg tggacaggtc gccggagcgg gccgggtcgt agccgcccca
    12481 gacctcgcgg ttgccgaacg ggcgcggcgc ggttgggtcg tgatcctgcc aggtggccgg
    12541 gtctacgccg cagcgctcca ggtcgtcaaa gctgaacacc gcgtctttat tgtccacaaa
    12601 cacgcacata tacagcatgt tgaacgtgtc cacgttgtaa cggttgcgca gtttttccag
    12661 gctggccaga ttgaagccgc cgaggatcgc atcttccatt gtgataacgt accgccactg
    12721 accatccggg cagagccgcc cgccgtcgcg cagttcgtca aagccgggga agttaacccc
    12781 ggcgcgtttc ttgttgccgc gtttccattc ctcgcctgtc cagaacgggt aagcctggtg
    12841 cgttttggcg ctgggggtgg aaaagtaagt ggtgcgccat ttgtcatggg tggccattgc
    12901 gctggccact tcgttaaggc gggcaaagtt cggcacccaa aagtattcat cgcagtacag
    12961 atgcccgctg taagattgcg cggtgttctt gttggtggat aaaaagcgca gttcggcccc
    13021 gttgctcagg cggatcgggt tgccggtcag ggtgatatca aaatactgct gcgcaatgtt
    13081 gacgatgtac gagcggaaaa cctctgcctg ggcgcggctc gccgacagga agatttgcgg
    13141 ctcaccggtc agcaccgcat tttcaaaggc ttcaaaggca aaataccagg tggccccaat
    13201 ctggcggctt ttcaggatat tgcgcacctg ctggccaata ttaaggcgca ggtgtttttg
    13261 atagccgaac aggtgttcat tagcccaggc gtcaaagtct tctttggtca ggctggaaat
    13321 gtcgtttttg cggtactggc gctttttggc cgggcgttca tcgtcatcat tgccgcgtgg
    13381 gccgggtgag ttaccatgac cggcggcggc gagtttttct ttatgcttgt tgctctgcgc
    13441 acgcaatttg acggcgtgcg cgatcagcat gtccatttcc tgcaattcca gctcggtctt
    13501 tttatcccga ccggccagca actgataacg gcgctctatc gcctcttcgg tgctttcggc
    13561 gttgagtaaa tccgcccagc cgaatttttg cgcccaatag taaataatcc gcgcattggg
    13621 cagatttaaa tcagcggcaa tttctttcgg tgtggctctt tttaaataga gcagccgcgc
    13681 aacaccgatt aattcatcag aatatttagc catgccggta ttatgcggcg tggtttttat
    13741 tttatgacct gtgtttattt cgctatgttc gtcaaagaat cgttatccga atggaggcga
    13801 ataaagccgg tcgccgtcct ttttttattc cgtaataatg ccgttgtccg acaggaacgg
    13861 agtatgtaga tgtctcagtt aatgactaac tggatttgta tcgccacgga gggggaaacg
    13921 gttgataagc gggtcatgga aagacagtgg ctcattgatg ccgctgaaac ttatgacccg
    13981 caactctata ccgccctgat ttggccggag catgaaacat ggttcggcaa tatgggggag
    14041 gtactggcat taaaaaccga aaccggtgat gacgggctgt tgcgtttatt cgctcagtta
    14101 cgccctaacc accagttatt acaggctaac cgggatggtc agttgctgtt ttgctcggtg
    14161 gagttaacgc cagacggaaa ttttcgtggc acgggaaaaa cctatcttga agggctgggc
    14221 gtgaccaata ccccggccag cgtgggaacc acgcggctac gtttcagtag caaaaagcgc
    14281 ggccgtttat tcggtgcatt aaagccgctg gttattgatg aagtaaaaga aatcaaaggg
    14341 aatagcatgg caagtaaatc atggcatagc ctgtttggta ttaagccgaa ggcattcgct
    14401 gagggtgaag gcgaaagtaa cgatgcaggc ggtgacgata aattgcaggc actggcggaa
    14461 gcgctggccg aactggaatc ccgcgtaact gcgctggaaa gtcagcaaag ccagaccacc
    14521 gacgcagtgg aagccgttca ggaagatatg gacacggtaa aagaggtggt ggataccgaa
    14581 gatttcgcca cgctgcgtaa taacctgccg aagattttga ataatttcgg caagctggat
    14641 cgctctatta ccaaattgcc acagcgtcag gttggcaata aacccaaagg gtttaatttc
    14701 ctgtaattcc atttattggg tgatacctct ttttttatct cgatatcgag aggacgcatt
    14761 atgtttttaa atcagcgggc gcgggaatat ctgagcgcct acagtgtcgg tctggctcag
    14821 gaatatgggg tatcggatac cgcccgttat ttcgcgctga ccgacccgaa agaaacccag
    14881 cttcgcgctg ccctgctgga gcgcgtggat ttcctgtcca tgattaacgt tctggatgtg
    14941 gatcaactct ccgggcaggt ggtgtcggta ggtagctccg cactgcatac cggccgtaag
    15001 gaagggggcc gttttatccg tcaggttggc gtggatggca atgactataa gctggtcgag
    15061 acggattcct gcgcggcact gccctgggat ctgctgtcgg tgtgggctaa cgccggtggc
    15121 gaagatgagt ttttccagtt ggtgcaggcg ttttcgaacg aagcgtttgc gctggatatg
    15181 ctgcgtatcg gttttaacgg tactcacgtc gccaaaagta ccgacccgga cgaaaaccct
    15241 aacggcgaag acgtcaacat tggttggcat cagcgcatga agggtttcaa agacgggcag
    15301 caaattatca ccgaccgggt agtgctggat gaaggtggcg attatacgtc actggatgcg
    15361 atggcatccg atttgattaa cgccaaaatt ccccagcaat accgcaatga cccgcgtctg
    15421 gtggtgctgg tcggggcgga tttggtcgcc gccgaacagt atcgcctgtt ccagaaagcc
    15481 gaccgcccga ccgagaagat cgccgcccag atgctggata gcaccattgc cgggcgtcct
    15541 gcgatggtgc cgccgtttat gccgggcaag cgcatgaccg ttaccacgct gtcgaacctg
    15601 catatctata cccagcgtaa tacccggcag cgtaaagctg aattcgtgga agaccgcaaa
    15661 cagtttgaaa acaagtacct gcgcaatgaa gggtatgccg tggaataccc ggaactgtat
    15721 gcctcttttg atgaaagcgc cgtcactgtc ggtaccgtgg ccgagcctac ggaaaaaccg
    15781 gccggagcgt aaccgatggc cctgtcacct gcgcaacgcc ataacgcccg gatgtatgcc
    15841 gagcagcagc tatcccggtg ccaggcggta tctggcgatc acagcctgca tgtgcaactc
    15901 cgtgcgctgg aaaacgatgt ggcacggctg cgcagtcagc ccacgttacg cgacagggta
    15961 gagatgaaac gccgggagtt gctgccgcgc tggttgccaa cggtacaacg ctatctggac
    16021 agcggcgagg tgtatcaaaa caaggtgttc gcgtattgcg tggtgtggct gtttgatgtg
    16081 gaggagtttg atcaggggct ggcgtgggca gatatcgcca tcgcgcaggg acagtgcacc
    16141 cctgacaaca tccggcgcac gttcgcggcg tttattgccg atacggtgct ggcctgggcg
    16201 cagcagacgg cggacatggg gcagagtgtg gaaccgtatt tttcccgcac gtttaagaac
    16261 gtggcagaaa actggcggct gcatgaggag atcaccgcca agtggttcaa gttcgccggg
    16321 ctgctactgc tgcgtgatga gcaggggcaa ccacgggcga cagcggcggc ggatatcgac
    16381 acgctgaaag cggcggatgc cttgttgcat caggccgagc agttttaccg ccaggttggt
    16441 gtgggcacga tgcgccgcaa tattgccgcc cgcattcggg cgctgcaaaa agaataaccg
    16501 actaccgcaa gccgggcggg cgcggctgag gcaatgcacc gggggtgcga tgtgccgtgg
    16561 aagccggtca gcccgccttt ttacggggga tgtatgttca gtggaacacc ggttgattat
    16621 caggatgaac aactggccaa caatggattt tggccagacc tgaacgtcag ggattttcag
    16681 tcacagcgca ccattcccgc cgatctggat gctgataccg tcgcacaggc gctgctggca
    16741 gcggtgggcg aggtcaacgc cgatctggct gatgtcgagg cccgcaaccg ggcgaagggg
    16801 tttgcgcggg cacaggatgt gccgggcgtc agtttgaaag gccagaacgt cctgtgcgcg
    16861 cagtatcaaa aagcggtgtt tgccagggca aaagccgact tgctgggcga gtttgccacc
    16921 attggccgcc gtgagtctca tccgggacag gagggggacg acacacgcaa gggattgctg
    16981 ggggaagcgg cgatggttat tcgccgcatg aaagggctga aacgggcaac ggtgcggatg
    17041 gtatgagcaa gctggatgac ctgaccacct ttgtttcgaa gcatctgccg ccccgcgtga
    17101 tgcaggggtt tgacagcttc atggatgaag tgagctttat ccccgcccgc cgtgacttgg
    17161 gcgaagacca gtatcaactg gcggtgatga ggtttgatgc cgtgttgagc tgggagcgct
    17221 ggccataccg ggtgtgtgac ccgcgcaacc tgtgcgctct gttactggtc tggcaggaag
    17281 ggcaggacga tgtgccgtac atggatgccg ggctggatat ggagttgccc acactggatg
    17341 tggacgtgcg cgatcaggat agcgcgattg tcgtggtgtc gctgcaactg gcggaatcac
    17401 tggcgatcgt ggctgatgac gacgggatca ttccgtttga tggtcggcgc tggcgtctga
    17461 ccagcccgga aatctggcag gtcacatcag ggcatttgtt cggtgcaggc ggcgacgggg
    17521 cggaggtcgg agcgtcatga ttgtgcatgg cgagctgagc cagtcacaac tggccgaact
    17581 gcgcaccgca ttgcaacggc tgacgctgcc acccaaaaaa cgccagcgtt tactgtggcg
    17641 gctggcgaaa tacggggtga ttgcggcggc gaaacggaac gtccgggcgc agcaggcacc
    17701 ggacggcagc gcctggacgg cacgacgcgg ccgccgccgt ggcaggatgc tgcgcaatct
    17761 gcccaacctg ttgcatatcc gcgaaatgcc agagattcag gcggtacgga tttatctaaa
    17821 gggcggtgcg tatcgcaacg ggaaaacgcc ggtaccggcg ggcgtggtgg gctacagcca
    17881 gcaaaacggc atgagtgtat ccgtcaagcg ttcacaggtc ggcaatggac gccctgagcc
    17941 gggacggatg gccacacggc gacaggcccg caaactgcgg gcgctggggt accgggtaaa
    18001 acgcggggcg cgatggaaaa agccgcctta ccgggagatt gaggaaatcc tgagctttgc
    18061 acaggcggga ttactcatcc gtaagttgag cggcaaggcg gcaaaaaccg cctggacagt
    18121 ggatgttcct gcccggccat ttttgggcat gaacgatgcg gagtttacaa aagcgctggc
    18181 acggcagcta cagggcattg gctttggctg ggatgtgaaa gcgcaggata tcaaggggta
    18241 agcatgagtt ggccaacggt tcaggttaac caggtaaacc agctacaagg cgaaaccagc
    18301 gagattgagc gcgtggtgct ctttatcggt gaggggtcgg tcgatgcggt gaaaacagtg
    18361 ccggtgaata cccaaagcga tctggatcag gtgctggggg cggcggattc ggtactgaaa
    18421 cgtgacgtca gtgctgcgat ggtcaatgcg gggcagaact ggagcgcctt tgtttgtctg
    18481 ctgccgccaa aaggcgactg ggtgagcgct gtcactgccg cgcagctggt ggccagtgtt
    18541 gaaggtgtcg ttgtctcgtt gcctgccagc aaaaatagta tcgcccaggc ggccagccta
    18601 cggtctgcac tggtgtctaa atttggtcgc tgggtgtggt ttctgctggc cgttgacggg
    18661 ccgaaagaag gcgagggctg ggacaaatat ttacagagcc tgagtaattt acagaacggc
    18721 gccgcggctc cggcggtgca actggtgccg cggctgtggg gcaatgagcc gggcgtgctg
    18781 gctggccgcc tgtgtaaccg tgcggtgacg atcgccgaca gcccggcgcg ggttcaaacc
    18841 ggtgccttgc tggcgatggg gcgcacggat ttaccggtgg acggtaccgg cgtgatgctc
    18901 gatctggcga tgttgcaggc gctggaaaaa cagcggtaca gcgtgccgat gtggtatccc
    18961 gactatgacg gctactactg gtcagatggg cgcaccctgg acgtggaagg gggcgactat
    19021 caggccattg aaaacctgcg cgtcgtggac aaggtggcgc ggcgcatccg gttgcaggcg
    19081 attgccaaaa ttgccgatcg cagcctgaac agtacgccgg gcagtatcgc cgcacatcaa
    19141 gggtactttg ccaaaacgtt gcgtgaaatg tcccgcagta cccaaatcaa cggcatcacc
    19201 tttccggggg aagtgaagcc gccgaaggat ggggatgtgg tgatcgcgtg gcgctctaaa
    19261 accgccgtgg aaatttatct ggttgtccgt acttacgaat gcccgaaagg gatcacggtc
    19321 agtctggtgc tggatatgtc gctggaggat agcgcatgac aaaacggatt tcgggccagt
    19381 cgtttgattt caacatggac ggcgcactgg ttcacgcgga aaaagtctcg ctgagcatca
    19441 cggataacac cgccgccgcg cagacgcagg gcattcccga tggctgggtg gccggtgacg
    19501 tcgcagccga aggtgaaatg gagctaagta ccaagagcct ggcggtggtg acggcgaaag
    19561 ccagcagcgc cgggtcatgg cggggtatcg agccggtgga cttgatgtgg tacgccaagg
    19621 cgggcagcga ggaaatgaag gtggaagcct tcggttgcaa gctgatcctg agtgacattc
    19681 tggatgttga cccgaagggc ggcagcgtga tgtcacacaa gattaagttt gtggtcacca
    19741 gcccggattt tgtgcgcatc aacggcatcc cctatctgga atcggaactg acggaaaagc
    19801 tgatcggcta aggacagtca tgcaggaata cgaaaagaac gcgctggggt tactggtgct
    19861 gggggcgctg atcgcgctgg gtaagttgct ggccagtgat gaaaaaatca cgccgcgcct
    19921 gtttttcggc cggatgattt tggggtcggc cacttcaatg gccgccgggg cggcgctggt
    19981 gtgggtaccg gggttatcgt cgatggccgt caccgggttg ggtgcggcgc tgggggtggc
    20041 cgggcatcag gcagttgaaa tctggttgcg ccgtcgtggc agtggtttgc tgaaagggag
    20101 tgacgcaaaa gatgacgtta agtgaaaaac agcagttatt tacccaactg gtcgcacagc
    20161 tgatccagtg ggcgggagag cggggatatc gcctgacgtt cggtgaggca taccgcacgc
    20221 cggagcaggc gaagctgaat gcccgcaacg ggtcaggcat cgccaacagt ttgcatacgc
    20281 aacgcctggc tgtggatctg aatctgttta tcaatggcga ataccagacc cgaacggaag
    20341 cctatttgcc gctcggtgaa tactgggaat tgctgggtgg atgctggggc gggcgcttta
    20401 cctctcgccc agacggcaac catttcagcc tggaacataa cggggtgcgc tgatggatgg
    20461 gctatggcgg attgtggcag gggtggcggt ggcctttgtc gctggttgga aagcggcgag
    20521 ctggcagcgc gacagtgtgg atctggcggt gactcgcgcc gctaccgccg ccgctgagca
    20581 atcacgccag gcgttgcagg cactggcgag ccagtccggc gcggcgctgg aatccaaact
    20641 ggaggcatta cgcaatgtgc cgaataaaac cgtttaccgg gaaatcgtta aaccggtttt
    20701 tactaacgtg tgcctgtctg ctgagtttgt cagcctgtac aacgacgccg ttaataacac
    20761 cgaacgtgtc ttatcaggaa aacctgaaaa agaaatgccc ggtcactaat ctgccgcgct
    20821 tatcaggtac caccggcaat gatgcggcgc agccgttaat cagttggccg caaatttatg
    20881 cggattgtgc cgcccggcat aatcagttaa ttgatgaaat aacccaacgg gaaaacatgc
    20941 aatgagcaaa gttaccttat ctgtttctgg caaagagttg tcgtttgaac cgaataccgt
    21001 tgcctataac ggcatgatta atgatatggc aatggataat aaagtggctc cggcggtgac
    21061 gtatcttcgc cgtattgtcg tagccaaaga taaagaaacg ctggatgaat tattaaaact
    21121 gccgggtgcc gcgttgcaaa ttaccgaagc ggtgaatgcg caatatgcac cgaagctgga
    21181 tatagaagta aaaaactaac ccagcggctg cgggccatcg aaaataattt tcttgaacag
    21241 gcattaaccc tgcgacggca ttatttaccg gctgaaaatg atgataccga taatctggcc
    21301 cgcgccgtct ggctggcaaa tacacactgg gaaaatatgc gtatttccgt ggcgaacggg
    21361 attgcgctgg cattaaaagg cgattcatga agcaactcga ttttacatta agcctgattg
    21421 ataagctgac ccgcccggta aaacaggcgc aggcggcggt caccggcttt gcgaaatcgt
    21481 cgcgggacgc cttttctaaa atcgcggttg gcggtgccgg gcttattggt accgctatgt
    21541 ctatccaggg ggcgcttggc ccggcggtag agatgcacgg cgcaatggtc gaagcgtcgg
    21601 cgcgtggcgt cgatgattct gccttgcaga agattaatgc caacgcgctg aaattcagca
    21661 cccagtacgg gcgttcggcg ctggagtatg tgcaatcgac cgcccggatt aatgcagcgg
    21721 tcggtaccct gaccaaagag gatttgccgg gggtagtcag ggcatccaat gtgatggcgg
    21781 cggcgctgaa agccacggcg gacgagtcgt ccgaattcat ggggcagatg ttcgccaact
    21841 ttcgctctga tgccgagtca atgggtaatg tgcagtttgc ggagcaactg gccagcaagg
    21901 ccgcctatat gcgtaatgcc ttcggtgttg agctgggggc gataaaagac ctgatggaag
    21961 gggcgcgtgg ggtcggcacc aactatggca ttggtatgga tgagcagttg gccgtgatgg
    22021 gcgaactaca gcgcacatta ggcacggaag cctccagctc ttacgaaggc tttttgtctg
    22081 gggcggttaa aggggctaaa aagttggggc tgtcgtttga agatgccaac ggcaagttac
    22141 tgacgatgcc cgcgatgctg gagaaattgc gcgggaagta cggtgccagc attgagggta
    22201 atctgaaagc ccagtctgat ctggatgatg cctttggtga cagtgcggcg gtcattaagc
    22261 agttgtatgg caatgtcggt gccctgcaac ggcatatcac cgaactgggc agcagtgacg
    22321 gcatgaagcg tgccacggaa atggcgcaga agatggccag cccctgggaa cggctgacgg
    22381 ctatctggta cgccattcgc gccgcaatgg gggccacatt gctgccggtg ttgtacccgc
    22441 tgatcaacaa gatggcggac ggcgggcagg tactggtcaa gtggctgaat ctgttcccga
    22501 atatcacgcg ggtcattggt tattgcgtac tggctgtact cagtctggcc ggtgcagggg
    22561 ctatcgccaa tatcgtgatg ggtgtttctg tgtttgtgct tggtggcttg aaagggttat
    22621 ggaaagggct aaccgccatc atgaaaattc atgtcggtgt gatctggctg tataacaaag
    22681 ccgtgctggc gtgggcggct acgatgcgta ttttgcgtgg cgtactactg gctgttcgca
    22741 tggccagcct gttaactgga gtagcattca atatcgcgct gtggccagtg ctgctgatta
    22801 tcggtgccgt cgccttgctg gtcgccgggt gttatctgct tattaagcat tgggatggca
    22861 taaaaaacgc gattactcaa accgatatgt ggaaaaccgt tacggaaaag gtgcaatggg
    22921 tcgcggagat atttggtcag gcatggcaag gcatcgttga cggatggaac cgtgttgtga
    22981 atgcgatggg taatttctcc ctgtctgaga cgatgggaaa aatggttgat ggcgtcgggg
    23041 agatcttttc cggtttatgg gacggtattt tagcatcgtt caatgcgtct tatcgctgga
    23101 ttattgaaaa gctaaacgcg attccgggga tcaatattgc tatgcctgaa tctgttcccc
    23161 gaccgggtgg tgacgggtta ttaacgggcg ggaaaataaa ggggattgat tcgggcgggt
    23221 tgcaacagga tatcagtaat agcaatgcga agaattacac cgacaacagc cggaaagtcg
    23281 aaaacctgac gatttatgcc aataaaggat ttacccctga gcaattaacg gaatgggaag
    23341 cactgcggta atggatgacg tgaaatatat tgacctgcta attacagaac gtgatttcag
    23401 cctgaatgcg gggcgtgagc cgatattttg caataaccgg atcagtattg gtcaggattg
    23461 cgttcacgcc attattgaaa gcggactgac caccaaactg gtggccgagc gcagcccgac
    23521 gctgcgggcc gatgtactga cacaaatgat tattctggtt gaagacgatg aacggattat
    23581 ccccggtacg gtcgtggtca gtgaagaaag cccgacccgg ctgtgggtga cggcggaaac
    23641 ctatgatttc gggccgatta cggccagggt ggacgtatga cggaaaagcc gaagattgat
    23701 tatgagcagg cgctgaaaga ggccgggatg ccagtaacgg ccgagacggt aacggaacag
    23761 tttcaggcgc aagtgacggc atccggtctg gtcactaaca catcgcggat gtcgccgttt
    23821 tggcggctga tctctgtcat ggtaacaacg ccggttatct ggctgaaaga cgttctgatc
    23881 agcgtggtgc tggccaatat gtatctggct acggcgtccg gcccattcct caatctgttc
    23941 gcctggggtg tcaatctgtc acgcaaggcg gctacggccg ctacgggtgt tatccgtttt
    24001 tataagtcgg atgcagcgca ggccgtggtg atcccggcgg gtacgctgat tcagaccgaa
    24061 cgcattaacg gcacgatttt cagtgtggcg gtgtcagcgg ataccgtgat taccgccggg
    24121 caggccagcg ctgacgtccc ggtgatcgcc acggcggaag gtggtgcatt caatctggcc
    24181 cccggttatt accggatttt gccggtgggg gttgccggta ttgagcgggt ggagaatcaa
    24241 gaggactggt tgctgacgcc cggtgcggat gaggaatccg atgatgacct gcgcgagcgt
    24301 tgccgcaacc agttcaatct ggtcgggaat tatcacaccg acgcggtgta ccgcagcatg
    24361 attgcggcgg tggccgggtt aagcatcgat cggattttct ttctgcatga cgccccgcgt
    24421 gggccgggta ccgccaatgc ttatctgttg ctggattcgg gggtggtatc gcagcccttt
    24481 atcgatgcgg tgaatgatta catcacggca caggggcacc acggccacgg cgatgatctg
    24541 cgctgtgtgg cgctgccgga aacgcagcac gatttaacga taacggtcta tgtgcgcaat
    24601 ctggtgaaca tgacggatga ggcgttagcc gcattgcgta ccgggtgcca ggatttagtc
    24661 cgctgcgcct ttcgggaaaa caccgggtat ggcgtggaaa agacgtggcc ctggtcgcgc
    24721 ttctcatttt ccacgctggc acaggaatta cacgacgcgt ttccgctgat tgcgtcactg
    24781 gatttttccc tgggcgatat tgtcagcggg ctaagtgtgc cgcgtctggc ctcgctgacg
    24841 gtggtgatag ccgatgcctg attttaaagg gcaactggcc ggcctgcggc taccgtcatg
    24901 gatggataag ggcgaacctg ccggcctgtt gaatgccagc aaagcctatt ggttgcaggt
    24961 gaatgactgg ctgcgctggc cgttgcagca actggacgtc gatacctgtg cggagccgtt
    25021 gctaaacgtg ctggcgtatc agcgcgacat ttcccggctg aaaggggaag cgctagatct
    25081 ttttcggcgg cgggtgaagt acgcctttgt gaatgcgcag gacgcgggca gcgtggccgg
    25141 gtttatcgct atttttgagc ggctggggat tggcactgtc accctggccg aacgtcagcc
    25201 agggtatgac tgggatgtga tcctggtgcg tatcaacgat gagcagttaa gcgggtataa
    25261 cgccttgatg atgagtctgg tcaggcagta cggccgcacc tgccgccgct atacgtttga
    25321 cctctcgaat ggggaaaccc agtcagtccg gggcggggag tttgagcaca acgcagaata
    25381 ctaccacgca atcagtttga tgccggttgg aacggtaacg gcgcgtgttg cgttgcgtta
    25441 tgcgcgcgca tccgcttcga cagaatatta ttcagccaac gtgtaagagg gattatggcg
    25501 cagagtgtga ttacccatgc gtttgaaacg tggaatgttc agcgggtttt agatggcgtg
    25561 gcagcccggc ccgataaagt cgtttttgcg cggataccgg gtcaggatga atcggtgccg
    25621 gtagaccgaa acgaagggct accgcctgct gatcagattc agcacatcgc cactattacc
    25681 caagccggtg tcctgaatga aaacgcggtg gtttattcgg tggtgctgga taccaccgtg
    25741 ggggattggg attacaactg gatcggcctg ctggacagcc aaacgaatac cgtgttgatg
    25801 attgtgcatg tacgcaccca gcagaaactg gcgacccgaa acggccagca gggcaacagc
    25861 ctgacccgta atctcatgat gcagtttgat ggggctgccg ctgccacaca aatcaacgtg
    25921 acagccgata cctggcagat tgatttttca gcccgtctgg cggggattga tgagcgtatc
    25981 cgcattgaaa atatggacag gtatggttca tccgcgtttt ttggcaatgc atatcaggtt
    26041 gtcaaagatg gcaatgcgta tgttgtaaaa gcgggggtag cctatgccgc tgggcttagg
    26101 acttcgctgt cgagtgatct aaaaattacg gtggatgcat tgccgactcg tgtctttctg
    26161 aatgtgtgct ggcgtggtga attcacacag gcatgggcgg ttgatagcca gatcgttgtt
    26221 gccaactcgg cagatcatga aatacgcgat ggtgttcagc actatttgct tcctgtcgcg
    26281 gatattgatg aaaacggcaa tatcaccgac tggcgtaaac aaggaagcct ggcagaacaa
    26341 aatgcgcaga ccctctatct tcgtaaggac gataatctgg ccgcattacg tgataaagaa
    26401 gccagccgaa aaaatttagg gttgggtcag cttgcggtaa tggataccga cacagccaga
    26461 caaacgcttc gtatcaccca attagaaaat gaactggtag gtatcccctt gccttatccc
    26521 ggtgcaacag cccctgacgg gtggctgaaa tgtaatgggc agtccttcaa taaatcgatg
    26581 tatcccctat tagctgggcg ttacccgtcg ggttttttac ctgacttgcg cggtgagttt
    26641 atccgtggct gggatgatgg gcggggcgtt gatgtcgggc gcggtttact gtctgcacag
    26701 acccaggcta ttcaagacca tagacacgtt ggcacgatgg taaacagtaa tccgctacaa
    26761 accggtatga ataccgggat cggtctgctg tcccaatata cccctacacc aacagtaggc
    26821 tattcaaacg aaatcagcag cggtggaacg gtggatggga gtatagaaac acgcccgcgt
    26881 aacatcgcct ttaactacat agtgagggcc gcataatgcg aaataattcg gtaatggcga
    26941 atgaaaccac gctggacgaa aacgggcacg cggtatcgtc tggctggatc acggtctatc
    27001 acgttgatgc gtcaacccgc gaatacttgg gaaacagcca ggaatatctg ttggtcggta
    27061 cgggtattcc ggctgacagc tatgcggaca cccccgaatt acccggcacc ggtcaggcgc
    27121 tatgccgaac aactgacggg caacaatggg agtatgtgcc tgattatcgt ggggtaaccg
    27181 catatcacac ggaaacccga gagcctttta ccgtagcgtc gctaggtgag ttacccgcgt
    27241 ttgccacgtt gcaggctccc tcttccgagt ttgacgtctg gagtgggaag gaatgggtaa
    27301 cggataagga tgtgcagaaa caggctgaga ttattgccgc tcaacgggat caagggctgc
    27361 gattggagac ggctaccacc cgcatccaga tgttaggtga tgcggttgaa ctgaatatgg
    27421 ctaccgatga tgaggtagcg gcactgaatg cctggaaagc ctatcgcgta ttgctaaatc
    27481 gggtagatgt aaatgccgcc ccggatatcg actggccgga ggctccggcg gtatgacatg
    27541 gcggcgcgct gatatctgcc tgacgtccgc actgccgccg gtgacctgtt cggtgttgcc
    27601 ggttcatccg tgggtctatg gcgtgggcaa cgtgaccgac agcggtcatt atttaagccc
    27661 ggtcaatgcg gtgacttacc tggctgacaa gttaggcgct gcggcggata acgtggcggt
    27721 gtgcgtgtgg atggtctgcg ggaacgggct gggggaattt ctgcaagcgc tggatgcact
    27781 aacggtggtt ttccccgctc cggtattgag ccaggttgcc cgacaggcgc gggctatggc
    27841 ggagttgtcc acggtaaaga tgcaactccc ggctaaaagc cgcacgttgc ccgctgcggc
    27901 gctgttgtcg gtggcgagct gccgtcaggc attgaatgcc cagcgtatgt cggttgccca
    27961 gcagcaggct accgcgccga tggggctgga tgctctgaaa gggatggcag agcgctttgc
    28021 atcccagcgc gaggccgcct tatcggaaat cagccaggcc atgcagcaga tggcccagcg
    28081 cagcgcgccg gcgtgggttt ttaccgggca gggcgcgccg ggtgtgatcg cggcggagat
    28141 gctgaaaaat attccccagc cgtctgcaat ttataccgct gccatgatgt ttacagggac
    28201 agaactggat gccttggaga gcatgatccg tgagccagat aattacgctc gcccttgatg
    28261 gtgaagctat ccccctgcgt ggcctgaccg tcacgccctc aatgcaattt gaagaaaaag
    28321 accagtccgg gcagacgtcc agtacggcca acgcggaaca gggtatcaag cccaaagagc
    28381 tgcgtgtgtc aggcgtgatc ccgtttaccg aggcgaaggt gttaacccgg ctgtttgccc
    28441 tggctgaagc caaagagggc aataagctga aacgctaccg ggtggccaac cctaccgcgc
    28501 aggcgatcaa tttccgactg gctaccttta ccgggtcgat tgacgcaccg aagcaggacg
    28561 gcaagcaagc ctggctggtg acgtttacgc tgcgggaaca tatcagcgta tcggaaaagc
    28621 gggatgcccg cgcaggcaat cagacagaaa cgaagaagca ggctccgggt aaggggagcg
    28681 atgccggtga aagtgatgaa caactgagct ggtttgagcg caaagtgctg aaaccggtga
    28741 atgatgcgtt ggggtaagcc atgcgaccga ttacacgact gatgttatcc ggtgatgcgg
    28801 tacatgctgt agacgtcaat atggtactgg agttaaacgc ctgcggccgg ggatttatca
    28861 cagcggagac gcagcaggac tataccggca agctggtcag gctggatgtg ggctataccg
    28921 atctggtgtt gcgctggttt accggttacg tcgagcggag ccagccggcc gaaaacggct
    28981 atcagcggct gtttgtgcgt gaactggcgg gtgtgtttga ccggatgtgg ccatgtgcat
    29041 ttcagcaccc gacgctcagg caactggctg actggctaag cgagcacagc gggttaacgg
    29101 tgcatctgcc tgatgccggg tatgtcagcc agcctattcc gcattttacc catagtggca
    29161 gcggtcatca gttgctggcc aacattgggg cggcgttcgg gattgatgat tacgtctggc
    29221 aacctttgcc ggatggtgcg ttgtatctcg gcagttgggc ggattcgttg ctggccggtg
    29281 cgccggttac catcccagcg gagttcagcc aggcgcaggc cgccggtaat agcatgacgt
    29341 tgccgctgat acagtcagtt cggcccggcg cggtggttaa ccagcaacgt ctttcccgcg
    29401 tgcagttgct caacgaaaac atgacgatcg agtgggtacc ggtgagcact gtcacgggca
    29461 gggcggcaca gcgcagccct gcccagcgtc agatcgacac cgcttatccc gaactgtcgg
    29521 ccggattaca cctgccgaag tttgcccgcg tagaagcgcc gtcagaagcg gccagtagcg
    29581 gtaatatcgc cgaccctttc cggccccgtt atgcggttga cctacagtta ctggatgcgg
    29641 acggtaaacc ggcaaaagat acgccggtat atccggcggt accgctgccg gtaccgatgg
    29701 ccgggagtga ggccgggctg ttccagtttc cgccgccggg tacgctggtg gaagtcgggt
    29761 ttaccggtgg acggccggat aagccgtttg tgcgtcagac tgtggccagt ggtcagtccc
    29821 tgccggatat caagccgggg gagcagttgc agcaacagcg ggcggaggtt tcgcagcgtg
    29881 tgacggtcgc cggggactgg gagcggaaga cggatcaggc tatcagggaa tcgtcaatgc
    29941 accgggaggt gagcgccgat gaggagctgc gcacgctggt taccagggaa accctgatta
    30001 aagcgacgga taacgctacg gtgctgggta cccacacact ccaagccggt gccatcgtgc
    30061 aaatcgccca aggggattac agcctggcta cgcaggccgg ttatacggcc gatgtgggcc
    30121 agtcagtgac ggtagaggta gggcaatcgc tgaccgagaa aatagggcaa ctgcgccgca
    30181 gcattgccgg tgcgcgtcag gaactagtgg ccccggtggt ctgggtcggt agccaacagg
    30241 tcaacgtcat gacgctgatg ctggacacgc tggacgtgat tcaggaactg gcgacgcaga
    30301 cggccagcca cacgcacaat aataccggca ccccattgaa tgcgggcgag atacagcaga
    30361 ccggccgccg caccggcaca ctcaaagaca agtacagccc gataatcggg tgatcgatct
    30421 ctacctaccc agcccgccgc gtgcgggctt ttttacgccc cctcgcctga cgcgctcagc
    30481 gggccgctga gccacgccct ttcccggtca cctcgccgcc atgccaacac cttgcgccgc
    30541 tgcctgtacc ctgctgacgc agccagcgca ccaacaaaat gaacgctcac atgacaaaat
    30601 cggcactaca ccgcacccgc ctgcggtttt cggatcgcaa agatttttca gttttgtttt
    30661 tctacaaaac ccaacgccag cccgcgccgc cgcagggctt ttgcggaaga acgtccactg
    30721 aaaacagtga aaggaatttc agcgtttttc agctttttgg atcaggaaag gatcgcttaa
    30781 aaattgcaac cataagaaat aaaagggttt tgtgcggatt tggtcagttc gaatggatct
    30841 ctgaatgtga gtaggcgtta tcttgggcca cgttatttgc agcaatcatg cgggtttggg
    30901 tgtggtgagg ctgtttgcag gaactgaaaa ggaatgaacc ccgctagggc ggggcgaggt
    30961 gcttaaagtt tgccttcggt aatcccaaaa tcggcgatgc tcttaccttg aaggtcatag
    31021 gtgcagttgt atgtcatcgt gatttttgcg ttgaaaccgt tggtaaattt cactttgtca
    31081 ccgatgaacg tcatttgttt tttggcttcg ttcaggcgga aatgtgaaaa catgggggtc
    31141 atcatgccgt cagtccactc gaaatcatac ttggatgact tttctatcag agggcggcag
    31201 cgtgatgctg cttcaatcca gtttttatca aacaagcatt gaccgtcatt tgctgcgcaa
    31261 ttctttgggg tatcggcttt tgcggtgggc ttgtcatcac ttccgccaaa gatttttgta
    31321 gcaccccaaa ccagtaacac cagtaccaca aaaccgccga ttgcctgacc ggctgtggta
    31381 ctaggatttt taacgccgca gtgcgggcag acttttgcag aggttgatac ttctttctta
    31441 cattctttgc attttgttaa agccataaac caagtcctat ttgattcaaa gaagctaaat
    31501 aatgtgacaa gcaatagggg aggttacaga gaaggctgcg ggtatgatga aagcctgccg
    31561 ccattttgtc gccacaggta ataaaaaagg ggttccgttt tcacgtaacc ccttgattta
    31621 attggtggag ctggggggag ttgaaccccc gtccgaaatt cctacaccgt cggtactaca
    31681 tgcttagtct ggtctttaca ttcgcttgcc agctgcggac agacacgcca ctaacaaact
    31741 agcctgattg gatttaacgc ttcaacccca ggcagggcat ccacgcgatc tcttttaggt
    31801 ttgacctctc ttgatccccg tcctaagagc ggaggctagg gagagaggac accttcagtt
    31861 tcttaggctg attaagctgc taaagcagca ggtgcgaagt tttcgtcgtt tgcgactatt
    31921 tttttgcggc tttttacgag gccaaccgcc cctcggcatg caccttgggt ttcgcgaatc
    31981 ccgtcgaatc cagaatcagc cccaagatat tcttttatta taacagaaag atggcgtact
    32041 aagctagcga ccgttagcga gcggcatttt tcatgatgcg cgctttatcc agcttccatt
    32101 cgcgctcttt gatatcgtca cgcttgtcgt gctctttttt acccttggcg acgccaacct
    32161 tgaccttgca ccaggcattt ttccagtaca gcgacagcgc gactaccgta tagccttcac
    32221 gattgactcg gccgtacagc gaatccaact cgcgctggtt cagcagcagt ttgcgggtac
    32281 gcgtcggatc gcaaaccaca tggctggagg cgccgtgcag cggtgtgaat gtggcgccga
    32341 aaaggtaagc ttcgccatca cgcatcaaca catagctgtc gctaatattg gctttgcctg
    32401 cgcgcagtga tttgacttcc cacccctgaa gtgccaatcc cgcttcaatc tcttcttcta
    32461 tgaagtattc atggcgggcg cgcttgttga gcgcaatggt ggcagaaccg ggtttatgtg
    32521 cttttttctt tgtcat
//
