# Supplementary material for: May the Phage be With You? Prophage-Like Elements in the Genomes of Soft Rot Pectobacteriaceae: Pectobacterium spp. and Dickeya spp
Source: Front Microbiol. 2019 Feb 14;10:138. doi: 10.3389/fmicb.2019.00138 (PMC6385640; doi:10.3389/fmicb.2019.00138)
Supplement: Supplementary file 2 [file Data_Sheet_2.ZIP › Supplementary_prophagesGENBANK_files/Genbank FILES _SRP_prophages/phiDdd1.gb]

LOCUS       Exported               47864 bp ds-DNA     linear   UNK 02-AUG-2018
DEFINITION  phiDdd1.
ACCESSION   .
VERSION     .
KEYWORDS    .
SOURCE      phiDdd1
  ORGANISM  phiDdd1
REFERENCE   1  (bases 1 to 47864)
  AUTHORS   .
  TITLE     Direct Submission
  JOURNAL   Exported Aug 2, 2018 from SnapGene Viewer 4.2.3
            http://www.snapgene.com
FEATURES             Location/Qualifiers
     source          1..47864
                     /organism="prophage phiDdd1"
                     /mol_type="genomic DNA"
                     /note="/genome_id=6666666.356850"
                     /note="/genome_md5="
                     /note="/project=robertczajkowski_6666666"
                     /db_xref="taxon:6666666"
     CDS             8..514
                     /codon_start=1
                     /product="FIG070121: Phage capsid and scaffold protein"
                     /label=FIG070121: Phage capsid and scaffold protein
                     /db_xref="SEED:fig|6666666.356850.peg.1"
                     /translation="MKIQIRLALAHEYDGLLAQLEIDQLRQQATCHASAKACCHAHASV
                     LRDYAEWELSQALDRISTALIRVITLKRHMLGITTSEFTEGLSYQKPDKVVMEQVVNCL
                     IAKSNNYRFEMDNEPVLSVLGLDSPSLPHADFPPVVNPIGRMNFFRDLKEKEAALTTRG
                     RNTVD"
     CDS             complement(782..2413)
                     /codon_start=1
                     /product="hypothetical protein"
                     /label=hypothetical protein
                     /db_xref="SEED:fig|6666666.356850.peg.2"
                     /translation="METYKQDIKEKSRIEIWENAINRLTSNHESSRILETSYLEKLIDF
                     CWKDILPDVFNYEEKIILRNGYSWVKKIESSYKKKKPSDLRIAFFCGPEPENDLNILLS
                     LGIEIENIWAFEVENRTYNEALSKARKHFQKLKIFPGSIGEFFNTTHQTFDIIYLDFVS
                     SLLTKSNPPLGTIHSVFDNQALSDLGVLIVNSCEPDNNDGNAEFLSHYFYNHSMIESSV
                     LNNNDGSNDNEFSSFTESPICHGYDPASLKQEIEKNISGAYSAFSTNYICYYASMLSPT
                     IRFLKNNSLKRQLFSNNPDDIKNTFSELSSVDAIKNLLIGDSDLSIEYSPIAGDRFMDA
                     NSFPFWNFIESLSNESPSSYFKDLYRREKEGVSILKAAQFRESIHSMLTGGEKLLSKRI
                     LSALPQIMSTIPDARGGLFCDIPMPHLWLEVALNQLGAPYHINVKKHKRWKYKSKVRTM
                     HTDLFVFDRCRAFYDSLPMIDQYESILTNIEEQIYSRCCIDIIGKQSRWPISNLYFGSN
                     LICINDSDWSDFADFERRIEIKCDEA"
     CDS             complement(2431..3621)
                     /codon_start=1
                     /product="Phage integrase"
                     /label=Phage integrase
                     /db_xref="SEED:fig|6666666.356850.peg.3"
                     /translation="MARTTRPLTHTEVQKAKAADKDLTLHDGNGLFLLVKITGKKLWRF
                     RYQKPTTGQRTMIGFGAYPALSLADARAMRDEKLSLLAKGIDPQEKVAKEAEEAQIAVE
                     SLFINVARSWFTLKQATVSTDHAKDIWRSLEKDVLPAIENIPVQQIKARTLIQALEPIK
                     ARGALETVRRLVQRINEIMVYAVNTGLIDANPASGIGMAFERPKKQHMPTIRPEELPKL
                     MRTIAMSNLSIPTRCLLEWQLLTLIRPAEASATAWAEIDIEKKTWSIPAERMKAKRDHI
                     VPLSEQALELLDIMLPISGNREHVFPSRNDPKKPMNSQTANAALKRIGYGGKLVAHGLR
                     SIASTAMNEAGFNPDVIEAALAHCDKNEVRRAYNRSTYLEQRKELMDWWGIFSFKK"
     CDS             complement(3887..4978)
                     /codon_start=1
                     /product="Phage integrase"
                     /label=Phage integrase
                     /db_xref="SEED:fig|6666666.356850.peg.4"
                     /translation="MAVRKLASGKWLCECYPFGREGKRVRKQFATKGEALAFERFTMEE
                     SENKPWLGEKVDNRSLREIIDLWFSLYGRTLADPKRMMAKLDIICTGLGNPKARELSAA
                     DFAHYRELRLAGQMTDSSGIPLSVVKPRTVNLEQRNLSAVFGTLKKLGHWDAPNPLSGL
                     PTFKIAQQELAFLAPNEIKRVLDACAESANPHLLLVTKICLATGARWSEAEGLSGQQVT
                     PYRITYTRTKGKKNRTVPISRELYDEIPRKSGKLFSPCRKTFERAINRTGIQLPDGQCT
                     HVLRHTFASHFMMNGGNILVLRDILGHADIKMTMIYAHFAPDHLEDAITKNPLNGLNWS
                     PKTGGRVAAANGNHAFSSQLTTE"
     CDS             complement(5086..5457)
                     /codon_start=1
                     /product="Phage protein"
                     /label=Phage protein
                     /db_xref="SEED:fig|6666666.356850.peg.5"
                     /translation="MKVLLSIKPEFVEKILDGSKKFEFRKGIFKNPDVKSVVIYSTMPV
                     GKVVGEFDIDAVIEDEPSKVWSKTKKYAGISKNFFDEYFGSKEKAFAIKIGDLRVYETP
                     LQLSALGENITAPQSYRYL"
     CDS             complement(5435..6508)
                     /codon_start=1
                     /product="hypothetical protein"
                     /label=hypothetical protein
                     /db_xref="SEED:fig|6666666.356850.peg.6"
                     /translation="MENLKYIPFNHVDFSDDFFTSLKSDYSHGFVEWFEKKCNSPQDKA
                     YVLYDENNKIDGFMYLKIEDGTVEDTEPQLTAYKHLKVGTFKFNPKGTLRGQRFLKKIF
                     DHAITEQVNDIYVTVFDKHSYLIRLFQLYGFVKVGTKTGPNGTENVLVRDMGTEELTGD
                     LLSDYPYINNRNKERKFLLSIYPTFHTRLFPDSKLITESPDIISDVSYANSIRKIYICA
                     MQDVLLMKAHDIIVIYRTSDNQGPAYYRSVATSLCVVEEVKTIDSFDNEEEFIKYCSRY
                     SIFTEPELRGFYKSRKYPYVISFTYNLALPKRLNRAKLIQDVGLDPNNYWGVLKLTDDQ
                     FDRITELGEINESIIVN"
     CDS             complement(6540..7628)
                     /codon_start=1
                     /product="hypothetical protein"
                     /label=hypothetical protein
                     /db_xref="SEED:fig|6666666.356850.peg.7"
                     /translation="MEIIMSRSLAIWGCRDYSGSNHEEDINDPFIDDLHINFWNINSKK
                     LYCIDFGVLFKKPEADEISEKGAICIYIPFKKKKSEIDDLSSYLNENDDLITAVFNEYL
                     NKKESIGNAFTKIHLTNKEAIIMNTKLDSDSGTFDNRLTLTERDDGTIIILKIKECISR
                     ENEHQHYIRFRIFIDKSEIKEIVRTFIPGDNFLKSNQERTDIIDFRINEQRNLPSGISS
                     TLSAAVCTPQKYHFFIIRDMSDEHSSAGKNYQGCRILEKETWQKYFHNRKALGDSSPII
                     YHWKLKVDTNKKERLTDFSAIARFKNTRTKLRKIIAYILYGLAISFSIKYIPADNSIVG
                     YSILSLSILYVIISISSYLKKY"
     CDS             complement(7653..8246)
                     /codon_start=1
                     /product="Repressor protein CI"
                     /label=Repressor protein CI
                     /db_xref="SEED:fig|6666666.356850.peg.8"
                     /translation="MNFGTGAKAAIERLVEAYGFKNRQALCDHLGVSKSTLANRYMRDS
                     FPADWVIQAALETGVSLRWLATGEGPKFDDARNDVIAIPRQKLIDGKLYDSNYYMFDKA
                     FLPDGLKDPVVILDSDITYIADRQFDEVVDGKWLVEIEGRTSIRDLTRIPVGKVRVSGA
                     GAEFDCGLGDISVLMKIIMICCKNIINIITNYHY"
     CDS             8376..8597
                     /codon_start=1
                     /product="hypothetical protein"
                     /label=hypothetical protein
                     /db_xref="SEED:fig|6666666.356850.peg.9"
                     /translation="MRPQISITLAVPSVSIEKYSELTGLSIDTINDMLADGRLTRHRLR
                     KDKKREKVMINIAAMTVDALADCDISLN"
     CDS             8630..9139
                     /codon_start=1
                     /product="Transcriptional regulator"
                     /label=Transcriptional regulator
                     /db_xref="SEED:fig|6666666.356850.peg.10"
                     /translation="MFDYQIAKQMHFDEACRAFSLRHNLAELARTAGMNQQILRNKLNS
                     DQPHKLTCDELLTLTDITEDATLIDGLLAQLNCLPAVPVNEARAERLTAYVLQATAAVG
                     KVAAESVSDERMTQTRRHSLMSTISDGVRYLSLIGLTVQSRIQANPAMASTLDALSGLG
                     ASLTIG"
     CDS             9236..9391
                     /codon_start=1
                     /product="hypothetical protein"
                     /label=hypothetical protein
                     /db_xref="SEED:fig|6666666.356850.peg.11"
                     /translation="MQKPISIAPFLRNNQAGVSLPVEVRHGKGKQGIIIRPDGRRWNPP
                     KGAFNR"
     CDS             9404..9733
                     /codon_start=1
                     /product="hypothetical protein"
                     /label=hypothetical protein
                     /db_xref="SEED:fig|6666666.356850.peg.12"
                     /translation="MSQSVDHQKWIQRCRDIVFKGESRAQSFWERAALDTREIILFSAK
                     PKLKSRHVNYSWHQFTAEERAAIWSAIKRIRSICDETALFGPDDFLKTRNQNGTSNMPN
                     PSPIH"
     CDS             9805..10035
                     /codon_start=1
                     /product="hypothetical protein"
                     /label=hypothetical protein
                     /db_xref="SEED:fig|6666666.356850.peg.13"
                     /translation="MIATKLRPMNAAADGALIELLNKARLEERKDQHFSFSLRLAALAV
                     RAQQRDLSAAEVVALIRQESERFEHSAQELI"
     CDS             10035..10358
                     /codon_start=1
                     /product="hypothetical protein"
                     /label=hypothetical protein
                     /db_xref="SEED:fig|6666666.356850.peg.14"
                     /translation="MDMPQNPAYNRVDINGCYAIAKVGYDFALGEVQCDNRDGAQPYLS
                     TLAVYQTPITLVNDFVHRSLCAEIRRGTVTDITTMLTEAERLSLLCLNAFEQLENTGTG
                     LSE"
     CDS             10355..12397
                     /codon_start=1
                     /product="Putative replication protein"
                     /label=Putative replication protein
                     /db_xref="SEED:fig|6666666.356850.peg.15"
                     /translation="MNPEHNGAYHVVNQWRREQFTRNEPDGLTYVERSLWHLNPLDHQW
                     RQQYLAGMPDYLAKYFGQRYEKLFKSDGHKGRRRANTFLLRTLGKSVLPRLRTVTERYQ
                     TQQRAAGDLPFPFGDDLEKLPVYDRDNIRALSQQVADFMAASLRDYTENRIRNTGELTD
                     RYITLLSFRHLGLLTLQAGTQPPYWAQFTKGRRPLSIEKAESGLLRMMSPEWWRARLKR
                     RRDIQREHMAIAVGQVQKAASPYVSRSTLDEWKEQKRRNREFFKAFELEDEEGNRVSLD
                     DKVNASNANPAIRRCELMVRMRGFEDLAQEMGCAGEFYTITAPSRYHAVHSGGGFVEQW
                     SGASPRDTQKYLCGVWARIRAELSREEISVFGFRVVEPHHDGTPHWHLLLFMRPEHIEQ
                     VRDIMAYHARREDADELNSEKAQTARFHYEPIDPEKGSATGYIAKYISKNIDGYALDGE
                     ADEETGESLRDMAKAVSAWASRWRIRQFQQIGGAPVTVYRELRRLGDKQLDNAAMDAVL
                     AAADVGDWAAYTQAQGGPLVSRDALVVRLSYEVTERANQYAEDVQKVQGVYSPLLGAHS
                     AIITRTVQWKIVPKQAAASAGAGVSGGPAAAWSSVNNCTPGLRRRLSELLHLRGFQPDP
                     GLVDVLIRGSHLAMSEGRALKLVNGRLEEVRQTGDCELWPGWNWE"
     CDS             12513..12668
                     /codon_start=1
                     /product="hypothetical protein"
                     /label=hypothetical protein
                     /db_xref="SEED:fig|6666666.356850.peg.16"
                     /translation="MDREFEQSLIVERIAFLAKNAGMEGNDERDRQIALIWIAELAGQL
                     MTLQAA"
     CDS             complement(12675..12941)
                     /codon_start=1
                     /product="Phage protein"
                     /label=Phage protein
                     /db_xref="SEED:fig|6666666.356850.peg.17"
                     /translation="MRVLKIECPECGSKAVIRKTNRKHRQIADIYCACSDVECGYTFVM
                     NLTFSHTLSPSAKTGDQLLQTVLNNLKPEQRQMALDLLKTAAA"
     CDS             complement(12995..14044)
                     /codon_start=1
                     /product="Phage portal protein"
                     /label=Phage portal protein
                     /db_xref="SEED:fig|6666666.356850.peg.18"
                     /translation="METEKSSMKRTSHRRQKAQNAPRKKMSIITFGKPEPVLTTGTDYR
                     DVWYDNEFNHYTLPIDRLALAQLVNLNGQHGGILYARRNMVASDYQGGGLSHDDMLAAA
                     FDYLTFGDIAILKVRNGWGEVIALTPLPALYTRIRKTGEFAVLQKGEPLVYPPEDVIFV
                     KMYDPQQQIYGLPDYIGGIHSALLNSEAVIFRRRYYHNGAHTGGILYTSDPNMTDEIEE
                     EIERQLASSKGIGNFSTILVNIPNGDKEGVQFIQMGDISAKDEFANVKNISAQDVLNAH
                     RFPAGLCGIIPQNAAGLGDPEKARNTYRKDEVIPIQRRFMASINKDPEIPQNLHLIFDF
                     GDDTTIQGA"
     CDS             complement(14020..15795)
                     /codon_start=1
                     /product="Phage terminase, ATPase subunit"
                     /label=Phage terminase, ATPase subunit
                     /db_xref="SEED:fig|6666666.356850.peg.19"
                     /translation="MAKYSDELIGVARLLYLKRATPKEIAADLNLPNARIIYYWAQKFG
                     WADLLSAESTEEAIERRYQLLAGRDKKTELELQEMDMLIAHAVKLRAQSNKHKEKLAAA
                     GHGNTPDSRSNDDDERPAKKRQYRKNDISSLTKEDFDAWADEHLFGYQKHLRLNIGQQV
                     RNILKSRQIGATWYFAFEAFENAVLTGEPQIFLSASRAQAEVFRSYIVNIAQQYFDIVL
                     TGNPIRLSNGAELRFLSTNKNTAQSYSGHLYCDEYFWVPNFARLNEVASAMATHDKWRT
                     TYFSTPSAKTQQAYPFWTGEEWKRGNKKRAGVNFPGFDELRDGGRLCPDGQWRYVITME
                     DAIRGGFNLASLEKLRNRYNVDTFNMLYMCVFVDNKDAVFSFDDLERCGVDPATWQDHD
                     PTAPRPFGNREVWGGYDPARSGDLSTFVIVAPPIYDGEKFRVLLVVNWHGMNFRYQANQ
                     IKKLFQRYHFTYIGIDVTGIGAGVFENIQHFAMRQATAIRYGVETKNRLVMKAADVVES
                     QRIEWDQDEKAIPASFMAIRRTTTASGNAMTFIADRSAETGHAEAFFAIAHALDNEPLN
                     YENKPQSRWRLKKAA"
     CDS             15805..15951
                     /codon_start=1
                     /product="hypothetical protein"
                     /label=hypothetical protein
                     /db_xref="SEED:fig|6666666.356850.peg.20"
                     /translation="MRRGFYFMTCVYFAMFVKEALSEWRRIKPVAVLFLFRNNAVVRQE
                     RSM"
     CDS             15952..16788
                     /codon_start=1
                     /product="Phage capsid scaffolding protein # Fam Scf032"
                     /label=Phage capsid scaffolding protein # Fam Scf032
                     /db_xref="SEED:fig|6666666.356850.peg.21"
                     /translation="MSQLMTNWICIATEGETVDKRVMKRQWLIDAAETYDPQLYTALIW
                     PEHETWFGNMGEVLALKAEDGDDGLLRLFAQLHPNSQLLQANRDGQLLFCSVELTPDGN
                     FRGTGKTYLEGLGVTNTPASVGTTRLRFSSKKRGRLFGALKPLVIDEVKEIKGNSMASK
                     SWHSLFGIKPKAFAEGEGESNDAGGDDKLQALAEALAELESRVTALESQQSQTTDAVEA
                     VQEDMDTVKEVVDTEDFATLRNNLPKILNNFGKLDRSITKLPQRQVGNKPKGFNFL"
     CDS             16843..17874
                     /codon_start=1
                     /product="Phage major capsid protein #Fam0066"
                     /label=Phage major capsid protein #Fam0066
                     /db_xref="SEED:fig|6666666.356850.peg.22"
                     /translation="MFLNQRAREYLSAYSVGLAQEYGVSDTARYFALTDPKETQLRAAL
                     LERVDFLSMINVLDVDQLSGQVVSVGSSALHTGRKEGGRFIRQVGVDGNDYKLVETDSC
                     AALPWDLLSVWANAGGEDEFFQLVQSFSNEAFALDMLRIGFNGTHVAKSTDPDENPNGE
                     DVNIGWHQRMKGFKDGQQIITDRVVLDEGGDYTSLDAMASDLINAKIPQQYRNDPRLVV
                     LVGADLVAAEQYRLFQKADRPTEKIAAQMLDSTIAGRPAMVPPFMPGKRMTVTTLSNLH
                     IYTQRNTRQRKAEFVEDRKQFENKYLRNEGYAVEYPELYASFDESAVTVGTVAEPTEKP
                     AGA"
     CDS             17878..18579
                     /codon_start=1
                     /product="Phage terminase, endonuclease subunit"
                     /label=Phage terminase, endonuclease subunit
                     /db_xref="SEED:fig|6666666.356850.peg.23"
                     /translation="MALSPAQRHNARMYAEQQLSRCQAVSGDHSLHVQLRALENDVARL
                     RSQPTLRDRVEMKRRELLPRWLPTVQRYLDSGEVYQNTVFAYCVVWLFDVEEFDQGLAW
                     ADIAIAQGQCTPDNIRRTFAAFVADTVLAWAQQTADMGQSVEPYFSRTFKNVAENWRLH
                     EEITAKWFKFAGLLLLRDEQGQPRATAAADIDTLTAADALLHQAEQFYRQVGVGTMRRN
                     IAARIRALQKE"
     CDS             18676..19128
                     /codon_start=1
                     /product="phage head completion protein (GPL)"
                     /label=phage head completion protein
                     /db_xref="SEED:fig|6666666.356850.peg.24"
                     /translation="MFSGTPVDYQDEQLANNGFWPDLNVRDFQSQRTIPADLAADTVAQ
                     ALLAAVGEVNADLADVEARNRAKGFARAQDVPGVSLKGQNVLCAQYQKAVFARAKADLL
                     GEFATIGRRESHPGQEGDDTRKGLLGEAAMVIRRMKGLKRATVRMV"
     CDS             19125..19622
                     /codon_start=1
                     /product="hypothetical protein"
                     /label=hypothetical protein
                     /db_xref="SEED:fig|6666666.356850.peg.25"
                     /translation="MSKLDDLTTFVSKHLPPRVMQGFDSFMDEVSFIPARRDLGEDQYQ
                     LAVMKFDAVLSWGRWPYRVCDPRNLCALLLVWQEGQDDLPYMDAGLDMELPTLDVDVRD
                     QDSAIVVVSLQLAESLAIVADDDGIIPFEGRRWRLTSPEIWQATSGHLFGAGGDGAEVG
                     AS"
     CDS             19619..20323
                     /codon_start=1
                     /product="Phage protein"
                     /label=Phage protein
                     /db_xref="SEED:fig|6666666.356850.peg.26"
                     /translation="MIVHGELSQSQLAELRTALQRLTLPPKKRQRLLWRLAKYGVIAAA
                     KRNVRAQQAPDGSAWTARRGRRRGRMLRNLPNLLHIREMPEIQAVRIYLQGGAYRNGKT
                     PVPAGVVGYSQQNGMSVSVKRSQVGNGRPEPGRMATRRQARKLRALGYRVKRGARWKKP
                     PYREIEETLSFAQAGLLIRKLSGKAAKTAWTVDVPARPFLGMNDAEFTKALARQLQGIG
                     FGWDVKAQDIKG"
     CDS             20326..21441
                     /codon_start=1
                     /product="Conserved hypothetical phage protein"
                     /label=Conserved hypothetical phage protein
                     /db_xref="SEED:fig|6666666.356850.peg.27"
                     /translation="MSWPTVQVNQVNQLQGETSEIERVVLFIGEGSVDAVKTVPVNTQS
                     DLDQVLGAADSVLKRDVSAAMVNAGQNWSAFVCLLPPKGDWVSAVTAAQQVASVEGVVV
                     SLPASKNSIAQAASLRSALVSKFGRWVWFLLAVDGPKEGEGWDKYLQSLSNLQNGAAAP
                     AVQLVPRLWGNEPGVLAGRLCNRAVTIADSPARVQTGALLAMGRTDLPVDGTGVMLDLA
                     MLQALEKQRYSVPMWYPDYDGYYWSDGRTLDVEGGDYQAIENLRVVDKVARRIRLQAIA
                     KIADRSLNSTPGSIAAHQGYFAKTLREMSRSTQINGITFPGEVKPPKDGDVVIAWRSKT
                     AVEIYLVVRTYECPKGITVSLVLDMSLEGSA"
     CDS             21438..21893
                     /codon_start=1
                     /product="hypothetical protein"
                     /label=hypothetical protein
                     /db_xref="SEED:fig|6666666.356850.peg.28"
                     /translation="MTKRISGQSFDFNMDGALVHAEKVSLSITDNTAAAQTQGIPDGWV
                     AGDVAAEGEMELSTKSLAVVTAKASSAGSWRGIEPVDLMWYAKAGSEEMKVEAFGCKLI
                     LSDILDVDPKGGSVMSHKIKFVVTSPDFVRINGIPYLESELTEKLIG"
     CDS             21902..22207
                     /codon_start=1
                     /product="Phage holin # possibly family II"
                     /label=Phage holin # possibly family II
                     /db_xref="SEED:fig|6666666.356850.peg.29"
                     /translation="MQEYEKNALGLLVLGALIALGKLLASDEKITPRLFFGRMILGSAT
                     SMAAGAALLWVPGLSPMAVTGLGAALGVAGHQAVEIWLRRRGSGLLKGSDAKDDVK"
     CDS             22194..22535
                     /codon_start=1
                     /product="Phage protein"
                     /label=Phage protein
                     /db_xref="SEED:fig|6666666.356850.peg.30"
                     /translation="MTLSEKQQLFTQLVAQLIQWAGERGYRLTFGEAYRTPEQAKLNAR
                     SGSGIANSLHTQRLAVDLNLFINGEYQTRTEAYLPLGEYWESLGGCWGGRFTSRPDGNH
                     FSLAHNGVR"
     CDS             22535..22891
                     /codon_start=1
                     /product="hypothetical protein"
                     /label=hypothetical protein
                     /db_xref="SEED:fig|6666666.356850.peg.31"
                     /translation="MDGLWRVVAGVAVAFVAGWKAASWQRDSVDLAVTRAATAAAEQSR
                     QALQALASQSGAALESKLEALRNVPNKTVYREIVKPVFTNVCLSAEFVSLYNDAVNNTE
                     RVLSGKPEKEMPGH"
     CDS             22848..23027
                     /codon_start=1
                     /product="hypothetical protein"
                     /label=hypothetical protein
                     /db_xref="SEED:fig|6666666.356850.peg.32"
                     /translation="MSYQENLKKKCPVTNLPRLLGITGNDAAQQLISWPQIYADCAARH
                     NQLIDEITQRENMQ"
     CDS             23024..23281
                     /codon_start=1
                     /product="Phage protein"
                     /label=Phage protein
                     /db_xref="SEED:fig|6666666.356850.peg.33"
                     /translation="MSKITLSVSGKELSFEPNTVAYNGMINDMAMDNKVAPAVTYLRRI
                     VVAKDKETLDELLKLPGAALQITEAVNAQYAPKLEIEVKN"
     CDS             complement(23343..23477)
                     /codon_start=1
                     /product="hypothetical protein"
                     /label=hypothetical protein
                     /db_xref="SEED:fig|6666666.356850.peg.34"
                     /translation="MLHESPFNASAIPFATEIRIFSQCVFASQTARARLSASSFSAGK"
     CDS             23469..25433
                     /codon_start=1
                     /product="Phage-related tail protein"
                     /label=Phage-related tail protein
                     /db_xref="SEED:fig|6666666.356850.peg.35"
                     /translation="MKQLDFTLSLIDKLTRPVKQAQAAVTGFAKSSRDAFSKIAVGGAG
                     LIGTAMSIQGALGPAVEMHGAMVEASARGVDDSALQKINANALKFSTQYGRSALEYVQS
                     TARINAAVGTLTKEDLPGVVRASNVMAAALKATADESSGFMGQMFANFRSDAESMGNVQ
                     FAEQLASKAAYMRNAFGVELGAIKDLMEGARGVGTNYGIGMDEQLAVMGELQRTLGTEA
                     SSAYEGFLSGAVKGAKKLGLSFEDANGKLLTMPAMLEKLRGKYGASIEGNLKAQSDLDD
                     AFGDSAAVIKQLYGNVGVLQQHITELGSSDGMKRATEMAQKMASPWARLTAIWNAIRVA
                     MGLTLLPVLYPLINKMANAGQVLVRWLTLFPNIARVIGYCVLAVLSLAGAGAIANIVMG
                     VSVFVLGGLKGLWKGLTAIMKIHVGVIWLYNKAVLAWAATMRILRGVLLAVRMASLLTG
                     VAFNIALWPVLLIIGAVALLVAGCYLLIRHWDGIKNAITQTDMWKTVTEKVQWVAEIFG
                     QAWQGIVDGWNRVVNAMGNFSLSETMGKMVDGVGEIFSGLWDGILASFNASYRWIVEKL
                     NAIPGINIAMPESVPRPGGEGLLTGGKIKGIDSGGLQQDISNSNAKNYTDNSRKVENLT
                     IYANKGFTSEQLTEWEALR"
     CDS             25415..25762
                     /codon_start=1
                     /product="Phage protein"
                     /label=Phage protein
                     /db_xref="SEED:fig|6666666.356850.peg.36"
                     /translation="MGSTAVMDDVKYIDLLITERDFSLNAGREPIFCNNRISIGQDCVH
                     AIIESGLTTKLVAERSPTLRADVLTQMIILVEDDERIIPGTVVVSEESPTRLWVTAETY
                     DFGPITARVDV"
     CDS             25759..26943
                     /codon_start=1
                     /product="Putative bacteriophage protein"
                     /label=Putative bacteriophage protein
                     /db_xref="SEED:fig|6666666.356850.peg.37"
                     /translation="MTEKPKIDYEQALKEAGMPVTAETVTEQFQAQVTASGLVTNTSRM
                     SPFWRLISVMVTTPVIWLKDVLISVVLANMYLATASGPFLNLFAWGVNLSRKAATAATG
                     VIRFYKSDAAQAVVIPAGTLIQTERINGTIFSVAVSADTVITAGQASADVPVTATAAGG
                     AFNLAPGYYRILPVGVAGIERVENQEDWLLTPGADEESDDDLRERCRNQFNLVGNYHTD
                     AVYRSMIAAVAGLSIDRIFFQHDAPRGPGTANAYLLLDSGVVSQPFIDAVNDYITAQGH
                     HGHGDDLRCMALPETQHDLTVTVYVRNLVNVTDETLAALRTGCQDLIRSAFRENTGYDV
                     EKTWPWSRFSFSTLAQELHDAFPLIASLDFSLGDIVSGLSVPRLASLTVVITDA"
     CDS             26936..27568
                     /codon_start=1
                     /product="Phage protein"
                     /label=Phage protein
                     /db_xref="SEED:fig|6666666.356850.peg.38"
                     /translation="MPDFNEQLAGLRLPSWMDKGEPAALLNASKAYWQQVNDWLRWPLQ
                     QLDVDTCAEPLLNVLAYQRDISRLKGEALDLFRRRVKYAFVNAQDAGSVAGFIAIFERL
                     GIGTVTLAERQPGYDWDVILVRINDEQLSRYNVLMMSLVRQYGRTCRRYTYDLWNGETQ
                     SVRGGEFEHNAEYYHAISLMPVGTVTARVALRYARASASTEYYSANV"
     CDS             27577..28998
                     /codon_start=1
                     /product="alternative bacteriophage tail fiber C-terminus"
                     /label=alternative bacteriophage tail fiber C-terminus
                     /db_xref="SEED:fig|6666666.356850.peg.39"
                     /translation="MAQSVITHAFETWNVQRVLDGVAARPDKVVFARIPGQDESVPVDR
                     NEGLPPADQIQHIATITQAGILNENAVVYSVVLDTTVGDWDYNWIGLLDSQTNTVLMIV
                     HVRTQQKLATRNGQQGNSLTRNLMMQFDGAAAATQINVTADTWQIDFSARLAGIDERIR
                     IENMDRYGSSAFFGNAYQVVKDGNAYVVKAGVAYAAGLRTSLSSDLKITVDALPTRVFL
                     DVCWRGEFTQAWAVDSQIVVANSADHEIRDGVQHYLLPVADIDENGNITDWRKQGSLAE
                     QNAQTLYLHKDDNLAALRDKEASRKNLGLGQLAVMDTDTARQTLRITQLENELVGIPLP
                     YPGATAPDGWLKCNGQSFNKSMYPLLAGRYPSGFLPDLRGEFIRGWDDGRGVDVGRGLL
                     SAQTQAIQDHRHVGTMVNSNPLQTGMNTGIGLLSQYTPTPTVGYSNEISSGGTVDGSIE
                     TRPRNIAFNYIVRAA"
     CDS             28998..29618
                     /codon_start=1
                     /product="Tail fiber assembly protein"
                     /label=Tail fiber assembly protein
                     /db_xref="SEED:fig|6666666.356850.peg.40"
                     /translation="MRNNSVMANETTLDENGHAVSSGWITVYHVDASTREYLGNSQEYL
                     LVGTGIPADSYADTPELPGTGQALCRTTDGQQWEYVPDYRGATAYHTETREPFTVSSLG
                     ELPAFATLQAPSSEFDVWSGKEWVTDKDVQKQAEIIAAQRDQGLRLETATTRIQMLGDA
                     VELNMATDDEVATLNAWKAYRVLLNRVDVNAAPDIDWPEAPAV"
     CDS             29615..30340
                     /codon_start=1
                     /product="Phage protein"
                     /label=Phage protein
                     /db_xref="SEED:fig|6666666.356850.peg.41"
                     /translation="MTWRRADICLTSALPPVTCSVLPVHPWVYGVGNVTDSGHYLSPVN
                     AVTYLADKLGAAADNVAVCVWMVCGNGLGEFLQALDALTVVFPAPVLSQVARQARAMAE
                     LSTVKMQLPAKSRTLPAAALLSVASCRQALNAQRMSVAQQQATAPMGLDALKGMAERFA
                     SQREAALSEISQAMQQMAQRSAPAWVFTGQGAPGVIAAEMLKNIPQPSAIYTAAMMFTG
                     TELDALESMIREPDNYARP"
     CDS             30312..30839
                     /codon_start=1
                     /product="Phage protein"
                     /label=Phage protein
                     /db_xref="SEED:fig|6666666.356850.peg.42"
                     /translation="MSQIITLALDGEAIPLRGLTVTPSMQFEEKDQSGQTSSTANAEQG
                     IKPKELRVSGVIPFTEAKVLTRLFALAEAKEGNKLKRYRVANPTAQAINFRLATFTGSI
                     DAPKQDGKQAWLVTFTLREHISVSEKRDARAGNQTETKKQAPGKGSDAGESDEQLSWFE
                     RKVLKPVNDALG"
     CDS             30864..32495
                     /codon_start=1
                     /product="Phage protein"
                     /label=Phage protein
                     /db_xref="SEED:fig|6666666.356850.peg.43"
                     /translation="MLSGDAVHAVDVNMVLELNACGRGFITAETQQDYTGKLVRLDVGY
                     TDLVLRWFTGYVERSQPAENGYQRLFVRELAGVFDRMWPCAFQHPTLRQLADWLSEHSG
                     LTVHLPDAGYVSQPIPHFTHSGSGHQLLTNIGAAFGIDDYVWQPLPDGALYLGSWADSL
                     LAGAPVTIPAEFSQAQAAGNSMTLPLIQSVRPGAVVNQQRLSRVQLLNENMTIEWVPVS
                     TVTGRAAQRSPAQRQIDTVYPELSAGLHLPKFARVEAPSEDVSSGNIADPFRPRYAVDL
                     QLLDADGKPAKDTPVYPAVPLPVPMAGSEAGLFQFPPPGTLVEVGFTGGRPDKPFVRQT
                     VASGQSLPDIKPGEQLQQQRAEVSQRVTVAGDWERKTDQAIRESSMHREVSADEERRTL
                     VTRETLIKAADNATVLGTHTLQAGAIVQIAQGDYSLATQAGYTASVGKSATVEVGQSLT
                     EKIGQLRRSIAGARQELVAPVVWVGSQQVNVMTLMLDTLDVIQELATQTAGHTHPNTGT
                     PLNAGEIQQTGRRTGTLKDKYSPIIG"
     CDS             complement(33044..33547)
                     /codon_start=1
                     /product="hypothetical protein"
                     /label=hypothetical protein
                     /db_xref="SEED:fig|6666666.356850.peg.44"
                     /translation="MALTKCKECKKEVSTSAKVCPHCGVKNPGTTAGQAIGGFVVLVLL
                     VWGAIKIFGGSDDKPTAKADIPKNCAANDGQCLFDKNWIEAASRCRPLIEKSSKYDFEW
                     TDGMMTPMFSHFRLNEAKKQMTFIGDKVKFTNGFNAKITMTYNCTYDLQGKSIVDFGIT
                     EGKL"
     CDS             complement(34136..34618)
                     /codon_start=1
                     /product="tmRNA-binding protein SmpB"
                     /label=tmRNA-binding protein SmpB
                     /db_xref="SEED:fig|6666666.356850.peg.45"
                     /translation="MTKKKAHKPGSATIALNKRARHEYFIEEEIEAGLALQGWEVKSLR
                     AGKANISDSYVLMRDGEAYLFGATFTPLHGASSHVVCDPTRTRKLLLNQRELDSLYGRV
                     NREGYTVVALSLYWKNAWCKVKVGVAKGKKEHDKRDDIKEREWKLDKARIMKNAAR"
     CDS             34774..35208
                     /codon_start=1
                     /product="Putative oligoketide cyclase/dehydratase or lipid
                     transport protein YfjG"
                     /label=Putative oligoketide cyclase/dehydratase or lip
                     /db_xref="SEED:fig|6666666.356850.peg.46"
                     /translation="MPKISRSALVPFSAEQMYKLVNDVSSYPAFLPGCTGSRVLSSSRS
                     EMTAAVDVSKAGISKTFTTRNTLIDNQCILMQLVDGPFRQLTGDWRFTPLSDEACKVEL
                     NLDFEFKNVLIEMAFGKIFKELANNMVQAFTLRAKEVYCA"
     CDS             35201..35494
                     /codon_start=1
                     /product="UPF0125 protein yfjF"
                     /label=UPF0125 protein yfjF
                     /db_xref="SEED:fig|6666666.356850.peg.47"
                     /translation="MPEIRVEVVYALPERQYLRSLTLEEGSTAEQAIQASGLLALRPDI
                     DLGVNKIGIFSRPAKLTDVLSDGDRVEIYRPLLADPKELRRQRAERSKNKAR"
     CDS             complement(35551..35895)
                     /codon_start=1
                     /product="Outer membrane lipoprotein SmpA, a component of 
                     the essential YaeT outer-membrane protein assembly complex"
                     /label=Outer membrane lipoprotein SmpA, a component of
                     /db_xref="SEED:fig|6666666.356850.peg.48"
                     /translation="MRCKTLTVVAAVVVVMLTAGCSTLERVVYRPDINQGNYLAPADVA
                     KIRNGMTKQQVIYTLGTPMLQDPFGSDTWYYVFRQQPGHEAVKQQTLTLTFNSQGVLAN
                     VDNKPTLQTQ"
     CDS             complement(36007..37668)
                     /codon_start=1
                     /product="DNA repair protein RecN"
                     /label=DNA repair protein RecN
                     /db_xref="SEED:fig|6666666.356850.peg.49"
                     /db_xref="GO:0005524"
                     /db_xref="GO:0005694"
                     /db_xref="GO:0051276"
                     /translation="MLAQLTISNFAIVRELEIDFQAGMSVITGETGAGKSIAIDALGLC
                     LGNRSDASMVRPGASRADICARFSLADTPAALRWLEHNQLDDNNECLLRRVISADGRSR
                     AFINGTAVPLSQLRELGQHLIQLHGQHAHQLLLKPEHQRHLLDAYADESQLLSAMRQIW
                     QQWHQSCRELAQLQQATIEREARRELLQYQLKELNEFAPQSGEYEQIDVEYKRLANSGQ
                     LMSLSQQTLQILSESEDQNLLSMLHSARHQLSELVSLDEKLSGVFSMLEEAGIQISEAS
                     DELRHYCDSMDLDPIRLYELEQRLSRQLTLARKHHVTPEELPAFHQQLLQEQQQLEQQE
                     SDHETLNRAVQEFHQQALHVAEQLHARRSQHAGELAELITTNMHELAMPHGHFTIDVTF
                     TPDSLTANGADHIEFCVTTNPGQPHQPLIKVASGGELSRIALIIQVITARKMDTPALIF
                     DEVDVGISGPTAAIVGKMLRQLGQSTQVMCVTHLPQVAGCGHHHYFVSKHTDGAATETL
                     MQPLGKRERLQELARLLGGSAVTKNTLANARELLAA"
     CDS             complement(37752..38630)
                     /codon_start=1
                     /product="NAD kinase (EC 2.7.1.23)"
                     /EC_number="2.7.1.23"
                     /label=NAD kinase
                     /db_xref="SEED:fig|6666666.356850.peg.50"
                     /db_xref="GO:0003951"
                     /translation="MNRSFNCIGIVGHPRHPNALTTHEMLYHWLRAQGYHVVIEQQIAR
                     ELQLTDAATGSLSEIGQQADLAVVVGGDGNMLGAARVLSRYDINVIGVNRGNIGFLTDL
                     DPDHTQQQLSEVLAGRYIREQRFMLEAQVCRANHPNSSSTAINEVVLHPGKVAHMIEFE
                     VYIDDRFAFSQRSDGLIISTPTGSTAYSLSGGGPILTPSLDAIALVPMFPHTLSARPLV
                     INSSSSIRLKFSHITQDLEISCDSQISLPVQEGEEVLIQRSQYHLNLIHPENYSYFNTL
                     SSKLGWSKKLF"
     CDS             38757..39371
                     /codon_start=1
                     /product="Heat shock protein GrpE"
                     /label=Heat shock protein GrpE
                     /db_xref="SEED:fig|6666666.356850.peg.51"
                     /db_xref="GO:0000774"
                     /db_xref="GO:0006457"
                     /db_xref="GO:0042803"
                     /db_xref="GO:0051087"
                     /translation="MNAKNAENFMSSKEQKSPDEQVLDQKGAAEGQQTDAVPETTDVAD
                     PRDERIAELEAQLNDVQQRERESALRARAEMENIRRRAELDVEKAHKFALEKFAGEMLP
                     VIDNLERALEMADKSNEALSGMIEGVELTLKAMLSAVNKFGIEVVADVNVPFNPEIHQA
                     MTLLESADHAPNHVMMVMQKGYTLNGRLLRPAMVAVSKAKE"
     CDS             39499..39651
                     /codon_start=1
                     /product="hypothetical protein"
                     /label=hypothetical protein
                     /db_xref="SEED:fig|6666666.356850.peg.52"
                     /translation="MISRKHFPATYAFFPDVITWSLFIRIMPCRSFFCLYFVNLYVLKR
                     VSFVG"
     CDS             39785..41002
                     /codon_start=1
                     /product="Manganese transport protein MntH"
                     /label=Manganese transport protein MntH
                     /db_xref="SEED:fig|6666666.356850.peg.53"
                     /db_xref="GO:0005215"
                     /db_xref="GO:0006810"
                     /db_xref="GO:0016020"
                     /translation="MESVSRTSRKLKLSLMGPAFIAAIGYIDPGNFATNIQSGAAYGYQ
                     LLWVVVWANLMAMLIQLLSAKLGIATGKNLAEHIRDRFPKPAVWAYWVQAEIIAMATDL
                     AEFIGAAIGFKLLLGVSLLEGAILTGIATFLILTLQQRGQKPLEMVIGGLLLFVAAAYI
                     VELIFSRPELASLAKGMAVPSLPNSDAVLLAAGVLGATIMPHVIYLHSSLTQQQSNITR
                     AERYSATKVDVAVAMTIAGFVNLAMMATAAAAFHFSGNTSIAELDQAYLTLKPLLGQAA
                     ATIFGLSLVVAGLSSTVVGTLAGQVVMQGFVRFHIPLWVRRVVTMLPSFIVILSGMNPT
                     RVLVLSQVLLSFGIALALIPLLVFTGNRELMGCLVNSRRVQNIGKVIVCMVIALNLYLV
                     LDTLLG"
     CDS             41157..41744
                     /codon_start=1
                     /product="GDP-mannose pyrophosphatase YffH"
                     /label=GDP-mannose pyrophosphatase YffH
                     /db_xref="SEED:fig|6666666.356850.peg.54"
                     /translation="MMLSPITVLDKQLLSDHWFVLHKYVFDLKRKNGGMVRQVREVYDR
                     GNGAAILLYNRARGTVVLTRQFRMPTYLNGNESGMLLEACAGLLDDQSPEQCIRNEAIE
                     ETGYQIGEVEKLFEAYMSPGGITELVHFFAAEYDDSQRKTNGGGVDDEDIEVLELPFNN
                     ALAMIKDGRIRDGKTIMLLQHAQINGWFANVR"
     CDS             complement(41824..42774)
                     /codon_start=1
                     /product="Transaldolase (EC 2.2.1.2)"
                     /EC_number="2.2.1.2"
                     /label=Transaldolase
                     /db_xref="SEED:fig|6666666.356850.peg.55"
                     /db_xref="GO:0004801"
                     /translation="MNQLDALKQFTVVVADSGDIESIRHFSPQDATTNPSLILKAASLP
                     VYQPLFADALAYAHQQGGSRETLLINAGDRLAVNIGAEVLKSIPGRISTEVDARLSFDR
                     GMCVAKARKLVTMYEEKDVHRSRILIKLAATWEGIRAAEELEKEGINCNLTLLFSFAQA
                     RACAEAGVYLISPFVGRIYDWYQARQPSADYDAEQDPGVLSVRRIYEYYKQHRYRTIVM
                     GASFRKVEQILALAGCDRLTIAPPLLEQLKNSTAPVERILSPSTEGFHQPAPLSETEFR
                     WQHNQDPMAVEKLSEGIRLFAADQQKLEDLLAARL"
     CDS             complement(43019..43186)
                     /codon_start=1
                     /product="hypothetical protein"
                     /label=hypothetical protein
                     /db_xref="SEED:fig|6666666.356850.peg.56"
                     /translation="MEVQCALLQLFIHSLLPCLIALWVGWRVAQCTVSVIFETMKHYKI
                     HAGIPLNIVN"
     CDS             43148..45427
                     /codon_start=1
                     /product="NADP-dependent malic enzyme (EC 1.1.1.40)"
                     /EC_number="1.1.1.40"
                     /label=NADP-dependent malic enzyme
                     /db_xref="SEED:fig|6666666.356850.peg.57"
                     /db_xref="GO:0004473"
                     /translation="MDEQLKQSALDFHQYPVPGKIQVSPTKPLATQRDLALAYSPGVAA
                     PCLEIAEDPLAAYKYTARGNLVAVISNGTAVLGLGNIGALAGKPVMEGKGVLFKKFSGV
                     DVFDIEVDEQDPDKLIDVIAALEPTFGGINLEDIKAPECFYIEQKLRERMKIPVFHDDQ
                     HGTAIICTAAVLNGLRVVEKQISDVRLVVSGAGAASIACLNLLVALGLKHENIVVCDSR
                     GVIYKGREANMAETKAAYAIDDNGSRSLADVIPNADIFLGCSGPGVLTQDMVKTMAPRP
                     LIMALANPEPEILPPLVKEVRPDAIVCTGRSDYPNQVNNVLCFPFIFRGALDVGATTIN
                     EEMKLACVHAIADLALAEQSEVVASAYGDQDLSFGPEYLIPKPFDPRLIIKIAPAVAKA
                     AMESGVATRPIENFDDYIEKLTQFVYKTNLFMKPIFAQARTQPKRVVLAEGEDPRVLHA
                     TQELVSLGLAFPVLIGRPGVIEKRIQKLGLQIAIGKDFEVVNNESDPRFKAYWTEYFEM
                     MKRRGVSQEQAQRDMRGNPTLIGSIMVHRGEADAMICGTVGNYEEHFGVVEKVFGYRDG
                     VHVAGAMNALLLPSGNTFIADTYVNPDPTPEQLAEITLMAARTVRRFGIEPKVALLSHS
                     SFGTSDSPTAKKMRATLALVNQLAPELQIDGEMHGDAALVEAIRREQMPNSPLKGAANI
                     LIMPNMEAARISYNLLRVSSSEGVTIGPVLMGVAKPVHILTPIASVRRIVNMVALAVVE
                     AQTELL"
     CDS             complement(45485..45934)
                     /codon_start=1
                     /product="hypothetical protein"
                     /label=hypothetical protein
                     /db_xref="SEED:fig|6666666.356850.peg.58"
                     /translation="MTAIWVDADACPNVIKDVLYRAADRTATHLTLVANQPLRTPPSPH
                     IHSLRVAAGFDVADNEIVRRVQPGDLVITADIPLAAEVLEKHAIALNPRGERYTPDTIR
                     ERLTMRDFMDTLRASGVQTGGPATLSQRERQQFANELEKWLRQQA"
     CDS             complement(45931..46869)
                     /codon_start=1
                     /product="Coproporphyrinogen III oxidase, aerobic (EC 
                     1.3.3.3)"
                     /EC_number="1.3.3.3"
                     /label=Coproporphyrinogen III oxidase, aerobic
                     /db_xref="SEED:fig|6666666.356850.peg.59"
                     /db_xref="GO:0004109"
                     /translation="MSSPDINAIKHFLLTLQDDLCRQLELTDGSATFIEDAWQHASGGG
                     GRSRVLRQGRVFEQAGVNFSHVSGASLPPSASTHRPELAGRSFQAMGISLVIHPLNPYV
                     PTSHANIRFFIAEKPGEPAVWWFGGGFDLTPYYGFEEDAVHWHQTAFDLCKPFGDDVYP
                     RYKQWCDDYFFLKHRNEARGVGGLFFDDLNTPDFDTSFAFMRAVGEGFRHAYLPIVNRR
                     KDIPWGERERQFQLYRRGRYVEFNLVWDRGTLFGLQSGGRTESILMSLPPLVRWEYQYQ
                     PEPDSPEAALYRDFLPARDWLGLNTPSGAHK"
     CDS             47082..47507
                     /codon_start=1
                     /product="Acetyltransferase YpeA"
                     /label=Acetyltransferase YpeA
                     /db_xref="SEED:fig|6666666.356850.peg.60"
                     /translation="MEIRIFRQDDFEEVITLWERCDLLRPWNDPEMDIERKLNHDPDLF
                     LVAEVGGEVVGSVMGGYDGHRGSAYYLGVHPDYRGRGIANALISRLEKKLIARGCPKIH
                     LMVRQSNTAVISMYEKMNYDMVDSITLGKRLIEDQEY"
ORIGIN
        1 tattacgttg aaaattcaga ttcgtctggc gctggcgcac gagtatgatg ggttgctggc
       61 gcagttggaa atcgaccagc tccggcagca ggcaacgtgc catgcatcgg ccaaagcgtg
      121 ctgtcatgca catgccagcg tgctgcgtga ttacgccgag tgggaattaa gccaggcgtt
      181 agaccgtatc agtacagcgc tgattcgggt catcacgtta aagcggcaca tgctgggtat
      241 caccacgtct gaatttaccg aaggactttc ctatcaaaaa cccgataagg tggtcatgga
      301 acaggtagtc aactgcctga tagccaagtc gaataactat cgctttgaaa tggacaacga
      361 gccagtcttg tccgtgctgg ggcttgattc accttcgttg ccacatgcag attttccccc
      421 cgtggtaaat ccgatcggcc gaatgaattt tttccgcgac ttgaaagaaa aagaggctgc
      481 gttaacaacg cgcgggcgca atacggtgga ttgaattaat tagccgaatt atcatttcat
      541 taattttaat atcagcatat cgcccgccat cgcgcgggct ttttttttga gactttttct
      601 ctggctagca gttttttgat cgtgcatgca tacagtgcat gaatttgcat gtaaaactta
      661 cctctcaatt agccctgtcg cgccagtgct ggtgtggcct gagcttctcc atgcaactgc
      721 atgaaaagcg ctgcatgaag cgggcaggcg tggcggggat agcattgcgc gcagggggca
      781 atcatgcttc atcacattta atctctattc ttctctcaaa gtcagcaaaa tctgaccaat
      841 ctgaatcatt tatgcaaatt aaatttgatc cgaaatataa atttgatatt ggccatctag
      901 attgtttccc tattatatca atgcagcacc ttgaatatat ttgctcttca atattggtta
      961 gtattgactc atactgatca atcatgggta atgaatcgta aaatgctcta caacggtcaa
     1021 aaacaaataa gtctgtgtgc attgttctta cttttgattt atatttccat cttttatgtt
     1081 tttttacatt aatatgatat ggtgcgccta gttgatttag tgcaacttca agccataaat
     1141 ggggcatggg gatatcacaa aaaagaccac cccgagcatc tggtatggta ctcattattt
     1201 gaggcaatgc agacaaaatt ctttttgata ataatttctc tccccctgtc agcatagaat
     1261 ggattgattc tcgaaattgt gctgctttta aaatggacac cccttctttt tctcttcgat
     1321 aaagatcttt aaaatatgaa gatgggcttt cgttacttaa tgattcaatg aaattccaaa
     1381 atggaaaact attagcatcc ataaatctat ccccagctat aggcgaatat tctatgctga
     1441 ggtcactatc acctattaat agatttttta ttgcatcgac agaacttaac tcagaaaatg
     1501 tattctttat gtcatctggg ttattgctaa atagttgtct ttttaatgag ttgtttttta
     1561 agaatctgat ggtaggactt agcatgcttg cataataaca aatatagttt gtagaaaatg
     1621 ctgagtatgc ccctgatatg tttttctcta tttcttgttt taacgatgcc ggatcataac
     1681 catgacaaat aggcgactca gtaaaacttg aaaactcatt atcattacta ccatcattgt
     1741 tgtttaaaac ggaagactct atcattgaat gattataaaa ataatgagaa agaaattccg
     1801 cattcccatc attattatct ggttcacatg aattaactat aagaacacct aagtctgaaa
     1861 gggcttgatt atcgaataca gaatgtattg ttcctaatgg tgggtttgat ttcgttaata
     1921 acgaactaac gaaatcaaga tagattatat cgaaagtttg atgagtggta ttaaaaaact
     1981 cacctataga tccagggaat atttttaatt tttggaagtg tttccttgct tttgataatg
     2041 cttcattata agttctattt tcaacttcaa acgcccatat gttctctatt tcaatgccaa
     2101 gtgataatag tatatttaaa tcattctctg gctctgggcc acaaaaaaaa gcaattctta
     2161 ggtcgctagg ttttttcttt ttgtagctgg actctatttt tttaacccaa gaataaccat
     2221 ttctcaaaat aattttttct tcataattaa aaacatctgg caatatatcc ttccagcaga
     2281 agtcaattag tttttctaaa taagaggttt ctaatattcg tgaactttca tggtttgatg
     2341 ttaacctgtt tattgcgttt tcccatattt caatcctgga tttttctttt atgtcttgtt
     2401 tgtaagtttc cattgtgtgt attctttttc ctatttttta aaagaaaata tcccccacca
     2461 atccatcaac tctttacgct gttcaagata ggtagaacgg ttataagccc gccggacttc
     2521 attcttatca caatgcgcca acgccgcttc aatcacatca ggattaaaac cggcttcatt
     2581 catggcggta ctggctattg agcgtaatcc atgtgcaacc agttttccac cgtagccgat
     2641 gcgttttagt gctgcgttgg cggtctggct gttcatcggc tttttaggat cgttacggct
     2701 ggggaaaaca tgttcgcggt tgccgctgat agggagcatg atgtcgagca gttccagcgc
     2761 ctgttcgctg agcggcacaa tatgatcgcg cttggctttc attctttcag ccggaatgct
     2821 ccacgttttt ttctcgatat cgatctcagc ccatgctgtg gcggaggctt cagccgggcg
     2881 gataagtgtc agtaattgcc attccagcaa gcagcgggta ggaatggaga ggttagacat
     2941 cgcaatggtg cgcatcagct taggtagctc ttctggccgg atggtcggca tatgctgttt
     3001 tttggggcgt tcaaaggcca taccaatgcc ggaggcgggg ttagcgtcaa tcagcccggt
     3061 gttaaccgcg taaaccataa tttcgttgat gcgttgtact aaccgcctga cggtttccag
     3121 tgcgccacgg gctttaatcg gctccagcgc ctgtatcagt gtgcgggctt tgatttgttg
     3181 cacggggata ttttcaatcg ccgggagcac gtctttttcc agtgaccgcc aaatgtcttt
     3241 ggcgtggtcg gtgctaactg tggcctgttt cagcgtgaac cagctacgcg caacattaat
     3301 gaaaaggctt tctacggcga tttgcgcttc ttcggcttcc ttagccactt tttcctgtgg
     3361 atctatcccc ttggctaaca acgacagttt ttcgtctctc atggcgcggg catcggctaa
     3421 tgacaatgcc gggtaagcgc caaaaccaat catggtacgt tgacctgtgg ttggtttctg
     3481 gtaacggaac cgccacagtt ttttcccggt gattttgact aagagaaata acccgttgcc
     3541 gtcatgcagt gtcaggtctt tgtctgccgc tttggctttt tgcacttcgg tatgggtgag
     3601 ggggcgggtt gtccgtgcca ttgggagata tccttgatga ttggtatacg ccttttggta
     3661 tatatcgtac cgtataccaa taatcagcgg atttagccgg ctatcgtcgg acaatgacgg
     3721 aaacaaaaaa gcccacaaac ctagatggga tgcgggcttt aaggactttc ccggacgtat
     3781 ccggatatgt aagtggtgga gctgggggga tttgaacccc cgtccgaaat tcctacattc
     3841 cttccggtgg gtagtaaaaa caataaatta caataaaaac agaatgttat tctgtggtga
     3901 gttgtgagga aaaggcgtga ttgccattcg ctgccgccac cctgccgcca gtttttggcg
     3961 accagttcag gccgttgagt gggtttttag taatggcgtc ttccagatgg tcgggcgcga
     4021 agtgggcgta gatcatagtc attttgatgt cagcatggcc gaggatatca cgcagcacca
     4081 gtatattgcc gccgttcatc atgaaatggc tggcgaaggt gtggcgcagt acgtgggtac
     4141 attgcccgtc aggaagctga attcccgtcc ggttaatggc acgctcaaag gttttgcggc
     4201 agggagaaaa cagcttgccg cttttacgtg ggatctcatc atacagttca cggctgatag
     4261 gaacggttcg gttcttcttg cccttggtgc gggtgtaggt gatgcgataa ggcgtgactt
     4321 gctggcctga tagcccttcc gcttcgctcc agcgcgcgcc cgttgccaga catatctttg
     4381 tgactagcaa cagatgcggg ttagcagatt cggcgcacgc atccagtacg cgctttatct
     4441 cattgggagc cagaaacgcc agttcctgtt gcgctatctt gaacgttggc aagccggata
     4501 acgggttggg tgcatcccag tggcccagtt ttttcagtgt accgaagacg gcggataagt
     4561 tgcgttgttc cagattgaca gtgcgtggtt tgacgacaga cagagggatg ccgcttgagt
     4621 cagtcatctg cccggctaac cgcagttcgc ggtaatgcgc gaaatcggcg gcgctcagtt
     4681 ctctggcttt ggggttgccc aaaccggtgc agatgatatc aagtttcgcc atcatccttt
     4741 ttgggtcggc cagtgtgcgg ccgtaaagag aaaaccacag atcgataatc tcccgcaggc
     4801 tgcggttatc cactttttcg ccaagccaag gcttgttttc actctcttcc atcgtgaagc
     4861 gctcaaatgc caacgcttca cctttggtag caaactgctt gcgtacccgc ttgccttcac
     4921 gcccgaatgg gtagcactca cacaaccatt tccctgatgc caacttacga acagccatat
     4981 acccccctgt aaactgaggg aggcatattt actgtgtata aaaacagtca tcaatgtatg
     5041 gatgttgtga gagcaaacaa acagcgaaag gtggccaagg ccaccttaga ggtaacggta
     5101 agactgagga gcggtgatgt tttcacctaa tgcactgagt tgtagtggtg tttcataaac
     5161 acgcaggtcg ccgattttga tggcgaaagc cttttctttg ctaccgaaat actcgtcgaa
     5221 aaagttttta ctgattccag cgtacttttt cgttttgctc cagactttag atggttcatc
     5281 ttcgattact gcatcaatat cgaattcacc aaccactttt cctaccggca ttgtggaata
     5341 aatgacgact gattttacat cagggttttt aaaaatccct ttacggaatt caaatttctt
     5401 tgaaccatcg agtatcttct cgacgaactc cggcttaatt gacaataata ctttcattga
     5461 tttcacctaa ttctgttatt ctgtcaaatt gatcatccgt taatttcaaa acaccccaat
     5521 agttatttgg atctaatccg acatcctgaa ttagtttagc acggtttagc cgttttggta
     5581 aagctagatt ataggtaaag ctaattacat aaggatattt tctgctttta tagaagccac
     5641 gtagctcagg ctcagtaaat atgctgtagc gtgaacaata tttaatgaat tcttcttcat
     5701 tgtcaaagct atctattgtt ttaacttctt caacaacaca taaagatgtg gctacagaac
     5761 gatagtaggc tgggccttgg ttatcactcg ttctatatat gacgataata tcatgtgctt
     5821 tcatcaacag tacatcctgc atcgcacata tgtaaatctt tctaatgctg ttggcatacg
     5881 acacatcaga tataatatcg ggtgattcag tgatgagctt tgagtctggg aagagccggg
     5941 tgtgaaatgt ggggtatata gaaagaagaa atttacgttc cttatttcta ttgttgatat
     6001 atggatagtc agaaagcaga tcacctgtta actcttctgt tcccatatct cttactaata
     6061 cattctctgt tccattcggg ccggtttttg tccctacttt tacaaacccg tatagttgaa
     6121 ataatctgat aagatagcta tgtttatcaa aaaccgtgac gtaaatgtca tttacttgtt
     6181 cagttatagc gtggtcaaat atctttttta agaaacgctg gccacgcaat gttcctttgg
     6241 gattaaattt gaatgtgcca actttcaaat gtttatatgc tgttaactgt ggctcagtat
     6301 cttctacagt accatcttct attttcagat acatgaagcc atcaattttg ttgttttcat
     6361 cgtaaagcac atatgctttg tcttgtggtg aattacattt cttctcaaac cattcaacaa
     6421 agccatgaga gtaatcagat tttagtgagg taaagaaatc atcagaaaaa tcaacatgat
     6481 tgaaaggaat gtatttaaga ttttccattt tcattttcct tcattaatgt ttataagggt
     6541 taatatttct ttaaatacga cgaaatgcta atgattacat ataaaattga tagcgataga
     6601 atgctatagc ctactattga attatctgcg gggatgtatt taatggagaa agagatagca
     6661 agtccgtata atatataagc tattattttt ctaagttttg ttcttgtgtt tttgaatcta
     6721 gctatagccg aaaaatctgt gagtctttct tttttgttag tgtctacttt caatttccag
     6781 tgataaatta tcggagatga atcaccaaga gcttttctgt tatgaaaata cttttgccat
     6841 gtttcttttt caagaattct acatccttga taattctttc ccgcagatga gtgctcatca
     6901 ctcatgtctc taattatgaa aaaatgatat ttttgaggag tgcacacagc agctgataag
     6961 gttgatgata ttccagatgg tagatttctt tgttcattta ttctaaagtc aataatatct
     7021 gttctttctt gattgctttt aaggaaatta tcgcctggaa taaatgtcct aactatctct
     7081 tttatttcgc ttttatctat aaaaattctg aatcttatat aatgttggtg ttcgttttca
     7141 cgagaaatac attcttttat ttttaatata ataattgtcc catcatctct ttctgtaagc
     7201 gttagtctgt tgtcgaatgt ccccgaatca gaatctaact ttgtgttcat tataatggct
     7261 tctttgtttg taagatgtat ttttgtaaaa gcattaccaa tgctttcttt tttatttaaa
     7321 tactcgttaa atactgctgt gattaagtca tcattttcat tcagataaga actaagatca
     7381 tctatttcac ttttcttttt cttaaaaggg atgtatatac atatggctcc tttctctgat
     7441 atttcatctg cctctggttt tttgaacaga actccaaaat caatacaata taatttcttt
     7501 gaatttatat tccaaaaatt aatgtgcaag tcgtctatga atggatcatt gatatcttct
     7561 tcatggttac ttccagaata gtctctacat ccccatatag ctaaacttcg tgacataatt
     7621 atctccatct tgaatgatta attttaattt ccctagtaat gatagttagt tattatattt
     7681 atgatatttt tacagcaaat cattattatc ttcatcagga ctgatatatc ccccagccca
     7741 caatcaaact ccgccccagc cccgctaacg cgcactttcc ctactggtat acgggtcaga
     7801 tctctgatgc tggttcggcc ttcaatttca accagccact taccatcaac cacctcgtca
     7861 aactggcgat cggcaatgta ggttatgtcg ctatccagaa tgacaaccgg gtctttcagt
     7921 ccatcgggca ggaaagcctt atcgaacata tagtagtttg aatcgtagag ttttccatcg
     7981 atcagctttt gccttggtat agcgatcacg tcatttctgg cgtcatcaaa ctttgggcct
     8041 tcacctgtag cgagccagcg taaagatacg ccggtttcta aagcagcctg aatgacccaa
     8101 tcagcaggaa aagagtcacg catgtatctg ttagctaaag tgctttttga tacaccgaga
     8161 tggtcacata gagcctgacg attcttaaac ccatacgcct cgacaagacg ttcaatcgct
     8221 gcctttgctc cagtcccaaa attcataaag ttcaccaaat gtatactttt agtttgacta
     8281 acactaaaag tgatcgtaaa tttcgtttgt acacaaaaag tggactaatc acagttcaca
     8341 acggctcacc acaagccaat agggaatgtt gcattatgag acctcaaata tcaatcaccc
     8401 tggccgtgcc gtctgtctcg attgagaaat acagcgagct gaccggcctt tctatcgaca
     8461 ccatcaacga catgctggct gatggccgct taactcgtca ccgcctgcgc aaagataaaa
     8521 agcgtgaaaa ggtgatgatc aacattgccg ctatgacggt tgatgcgctc gcagattgtg
     8581 atatttcgct caattagttc gatgttgaga tttttggagt tcacaaacca tgtttgatta
     8641 ccagatcgct aaacagatgc actttgatga agcctgtcgg gccttttcac ttcgtcacaa
     8701 tctggcggag ctggcgcgca cggcggggat gaatcagcaa atcctgcgta acaagctgaa
     8761 ctcagaccag ccccacaagc tgacctgtga cgaactgctg acgctgaccg acatcaccga
     8821 agatgccacg ctgatcgatg ggcttttggc gcaactgaac tgtctgccag cggtgccagt
     8881 gaatgaggcc agagcagaac ggcttaccgc ctatgtgctg caagccactg ccgcagtagg
     8941 gaaggtagcc gccgagagtg tatcagatga gcgtatgacg cagacgcgac gccatagcct
     9001 gatgagcacc atcagcgacg gggtacgtta cctgtcgctg attggcctga cggtgcagtc
     9061 tcgcattcag gctaacccgg caatggcgtc aacgctggat gctctgagcg ggttaggcgc
     9121 atcgctgaca atcggataat aacaacacca gggaaaccac gcgccgggcg tggtgaaaca
     9181 tcccggcacc tatttgcaac cgtctatctg tgggcggtta ccaataggag gaacaatgca
     9241 aaagccgatc tcaattgccc ctttcctgcg gaataaccag gccggggtat cgcttcccgt
     9301 agaggtgcgt catggcaaag gcaagcaggg catcattatt cggccagatg gccgccgctg
     9361 gaacccaccg aaaggggcgt ttaaccggta atcaggaggg aatatgtctc aatctgtcga
     9421 tcatcagaaa tggatacagc gttgccggga tatcgtgttt aaaggtgaat cccgcgctca
     9481 gtcattttgg gaacgtgctg cactggatac ccgtgaaatt attctgtttt ctgcaaagcc
     9541 gaagctgaaa tcgcgccatg tcaattactc atggcatcag tttacggcgg aagagcgcgc
     9601 cgctatctgg agcgcaatta agcgcatccg gtctatttgc gatgaaaccg cgctatttgg
     9661 cccggatgat tttttgaaaa cccgtaatca aaacggcaca agcaatatgc cgaacccgtc
     9721 acccattcat taattaaccc atagcaacga ataaatgccc tttatcgggc agggattcgt
     9781 attacctgaa aaaaggaaac cgtaatgatt gcaaccaaat taaggcccat gaatgccgcc
     9841 gctgatggcg cactgatcga actgctgaat aaagcccgct tggaggagcg caaagaccag
     9901 catttttcct tctcactgcg ccttgctgcg ctggctgtcc gcgctcaaca acgtgacctc
     9961 tccgccgccg aagtggtggc gctgatccgc caggaatcgg aacgttttga gcattccgct
    10021 caggagctta tctaatggat atgccacaaa accccgctta taaccgtgtg gatatcaatg
    10081 ggtgttatgc gattgcgaaa gtgggttatg actttgcgct gggggaagtg caatgcgata
    10141 accgggacgg cgcacagcct tatctgtcca ccctcgcggt ataccaaacg ccgattacgc
    10201 tggtgaatga ttttgtgcat cggtcgctct gcgctgaaat tcggcgtgga acggttactg
    10261 acatcaccac catgctgacc gaagcagagc gcctttccct gctgtgcctg aatgcctttg
    10321 aacagttaga aaatactgga accgggttaa gtgaatgaac ccggagcaca atggcgctta
    10381 tcacgtcgtc aatcagtggc gacgtgagca gtttacccgc aatgaaccgg acggcttaac
    10441 ctatgttgag cgcagtctct ggcatcttaa cccgctggat caccagtggc gtcagcagta
    10501 cctggccgga atgccggatt atctggcgaa gtatttcggc cagcgttatg aaaagctgtt
    10561 taaatccgat gggcacaagg gccgccgccg ggccaatacg tttttactcc gtaccctggg
    10621 gaaaagcgta ttgccacgcc tgcgcaccgt taccgaacga taccagacgc aacagcgtgc
    10681 ggcgggagat ctgccgttcc cgttcggcga tgatctggaa aagctgccgg tttatgaccg
    10741 tgacaacatc cgtgccctgt cacagcaggt ggccgacttt atggccgcat cgttgcgcga
    10801 ctacaccgaa aaccgcatca ggaacaccgg ggaactaaca gacaggtaca tcaccctgct
    10861 gtcattccgt cacctcggcc tgctgacctt gcaggccgga acacagccgc cgtactgggc
    10921 gcaattcacc aagggccgcc gcccgttatc catcgagaaa gccgaatctg gcttgttacg
    10981 catgatgtcg ccagagtggt ggcgggcgcg attaaaacgc cgccgtgata tccagcggga
    11041 acacatggcg atcgcggttg gccaggtgca aaaagcggcg tcaccgtatg tctcacgctc
    11101 cacgctggat gaatggaaag agcagaaacg gcgtaaccgg gagtttttca aggcgtttga
    11161 actggaagac gaagagggaa accgtgtttc tctggatgac aaggttaacg ccagcaacgc
    11221 taacccggcg atccgccgct gtgagctgat ggtgagaatg cgcggctttg aggatttggc
    11281 tcaggaaatg ggctgcgccg gggagtttta caccatcacc gcgccatcac ggtatcacgc
    11341 agtgcatagc ggcggcgggt tcgtcgaaca gtggagcggg gccagtccac gcgatacaca
    11401 gaaatacctg tgcggtgttt gggcgcgtat acgggcggaa ctgtcacgtg aagagattag
    11461 cgtgtttggc ttccgggtcg tcgagccgca tcacgatggc acgccacatt ggcacttgct
    11521 gttgttcatg cgcccggaac atatcgaaca agtgcgcgac atcatggcgt atcacgcccg
    11581 cagggaagat gccgacgaac tgaacagcga aaaggcgcaa acagcccgct tccactatga
    11641 accgattgac ccggaaaagg gcagtgctac gggttatatc gccaagtaca tcagcaagaa
    11701 tatcgatggt tacgcactgg atggagaggc cgacgaggaa accggggaaa gcctgcgcga
    11761 catggcaaag gcggtatctg cctgggcgtc gcgctggcgt atccggcagt ttcagcaaat
    11821 tggcggcgcg ccggtaacgg tttaccgcga gttgcgtcgc ctcggtgata agcaactgga
    11881 taacgcggcg atggatgcgg tgctggcggc ggcagatgta ggcgactggg cggcatacac
    11941 acaggcgcag ggcgggccgt tagtctcgcg tgatgcgttg gtggtgcgcc tgtcctatga
    12001 agtgaccgag cgtgccaatc agtacgccga agacgtgcaa aaggttcagg gggtgtactc
    12061 gccattattg ggggcgcact ccgcgatcat cacccgaacg gtgcaatgga aaattgtccc
    12121 gaaacaggcc gccgcgtcag cgggggccgg ggtttctggc ggccccgccg ccgcttggag
    12181 ttctgtcaat aactgtacgc cgggcctacg gcgacgatta tcggaactgt tgcacctgag
    12241 aggttttcag cctgatccgg ggctggttga tgtgctgata cggggcagcc atctggcaat
    12301 gagtgagggc agggcgctga aactggtcaa cggcaggctg gaggaggtac gccagacggg
    12361 agattgcgag ctttggccgg ggtggaactg ggaatagtgg ttcgtgtccg ttggtgggtg
    12421 ataaaagcgg aacatctaat gatttgttag ctttgtattt atattttgaa atgttttgtt
    12481 acgtgagcgc tattagcggt aggagataac taatggatag ggagtttgag cagtctctga
    12541 ttgtcgaacg gattgccttt ctggccaaaa acgccggtat ggaggggaat gatgagcggg
    12601 acaggcaaat tgcgctgatt tggatagcgg agttggcggg gcaactgatg acgttacaag
    12661 ccgcataatg cggcttaggc ggcagcggtt ttcagcaggt ctaatgccat ctgccgctgt
    12721 tcaggtttca ggttattcaa caccgtttgc agcaactgat cgccggtttt ggcgctgggg
    12781 ctgagtgtgt gggaaaaggt cagattcatc acaaaggtat agccgcattc cacatctgaa
    12841 caggcgcagt aaatgtctgc aatctgtcgg tgtttacggt ttgtcttgcg gataacggct
    12901 tttgagccgc actccgggca ttcaattttt aatacccgca tattccatgc tccggcctct
    12961 aaaacatggc taaattttag cgttttatgc cccattacgc accctgaatc gttgtatcat
    13021 cgccaaaatc aaagattaaa tgcagatttt gcggtatttc ggggtcttta ttgatggaag
    13081 ccataaaacg gcgctgaatc gggatcactt catctttccg gtacgtgttc cgtgcttttt
    13141 ccgggtcgcc cagcccggcg gcgttttgcg ggatgatacc gcacaggccg gccgggaaac
    13201 ggtgcgcatt cagcacatcc tgggcgctga tgttcttcac gttggcgaat tcgtccttgg
    13261 cgctgatatc ccccatctgg ataaattgca ccccttcctt gtcgccgttc gggatgttca
    13321 ccaggatggt ggagaagttg ccgatcccct tgctgctggc taactggcgt tcaatttctt
    13381 cctcgatctc atcggtcatg ttcgggtcgc tggtgtagag aatgccgccg gtgtgtgcgc
    13441 cgttatggta gtaacgacgc cgaaaaatca ccgcctcact gttcagcaag gccgagtgaa
    13501 taccgccgat gtaatccggt aggccgtaaa tttgctgctg tgggtcgtac atcttgacga
    13561 aaatcacgtc ttccggcggg taaaccagcg gttccccttt ctgcaatacc gcaaactccc
    13621 cggttttacg gatgcgggta tacagcgcgg gcaggggtgt cagggcgatc acctctcccc
    13681 agccattgcg cactttcaaa atggcgatat caccaaaggt caggtagtcg aaagcggcgg
    13741 ccagcatgtc atcgtgggac aggccacctc cctgataatc cgacgccacc atgttacggc
    13801 gggcatagag gatgccgccg tgctggccgt tcaggttgac cagttgagcc agggcgagcc
    13861 gatctatcgg cagggtgtag tgattaaact cattgtcata ccacacatca cggtaatcgg
    13921 tgccggtggt caataccggt tccggcttgc cgaaggtgat gatactcatc tttttacgcg
    13981 gggcgttttg cgccttctga cggcggtgtg atgtcctttt catgctgctt ttttcagtct
    14041 ccatcgggat tggggtttgt tctcatagtt cagcggctcg ttatccagcg cgtgtgcgat
    14101 agcgaagaag gcttctgcgt ggccggtttc cgcgctgcgg tcggcaatga acgtcatggc
    14161 gttgccgctg gccgtcgtgg tgcgccgtat cgccataaat gacgccggga tagccttttc
    14221 atcctgatcc cactcaatgc gctgactttc caccacgtca gccgctttca ttaccaggcg
    14281 gtttttggtt tccacgccgt agcggatagc tgttgcctgc ctcatggcaa agtgctggat
    14341 gttctcaaac accccagcgc caatgccggt cacatcaata ccgatatagg taaagtggta
    14401 acgctggaat agctttttga tctggtttgc ctgataacga aagttcatgc cgtgccagtt
    14461 gacgaccagc aaaacgcgga atttctcgcc gtcgtaaatg ggcggggcaa caatcacaaa
    14521 cgtggacagg tcgccggagc gggccgggtc gtagccgccc catacctcgc ggttgccgaa
    14581 cgggcgcggt gcggttgggt cgtgatcctg ccaggtggcc gggtctacgc cgcagcgctc
    14641 caggtcgtca aagctgaaca ccgcgtcttt gttgtccaca aacacgcaca tatacagcat
    14701 gttgaacgta tctacgttgt agcggttgcg cagtttttcc aggctggcaa gattgaagcc
    14761 gccccggatg gcgtcttcca tcgtgataac gtaccgccac tgaccatccg ggcagagccg
    14821 cccgccgtcg cgcagttcgt caaagcctgg gaagttaacc ccggcgcgtt tcttgttgcc
    14881 gcgtttccat tcctcgcctg tccagaacgg gtaagcctgt tgcgttttgg cgctgggggt
    14941 ggaaaagtaa gtggtgcgcc atttgtcatg ggtggccatt gcgctggcca cttcgttaag
    15001 gcgggcaaag ttcggcaccc aaaagtattc atcgcagtac agatgcccgc tgtaagattg
    15061 cgcggtgttc ttattggtgg ataaaaagcg cagttcggcc ccgttgctca ggcggatcgg
    15121 gttgccggtc aggacgatat caaaatactg ctgcgcaatg ttgacgatgt acgagcggaa
    15181 aacctctgcc tgggcgcgac tcgccgacag gaagatttgc ggctcaccgg tcagcaccgc
    15241 attttcaaag gcttcaaagg caaaatacca ggtggcccca atctggcggc ttttcaggat
    15301 attgcgcacc tgctggccaa tattaaggcg caggtgtttt tgatagccaa acaggtgttc
    15361 atcagcccag gcgtcaaagt cttctttggt caggctggaa atgtcatttt tgcggtactg
    15421 gcgcttttta gccgggcgtt catcgtcatc attgctgcgt gagtcgggcg tgttgccgtg
    15481 accggcggca gcgagttttt ctttgtgctt gttgctttgc gcccgcagtt tgacggcgtg
    15541 cgcgatcagc atgtccattt cctgcaattc cagctcggtc tttttatccc gaccagccag
    15601 caactgataa cggcgctcta tcgcctcttc ggtgctttcg gcgctgagta aatccgccca
    15661 gccgaatttt tgcgcccaat agtaaataat ccgcgcattt ggcagattta aatcagcggc
    15721 aatttctttc ggtgtggctc tttttaaata gagcagccgc gcaacaccga ttaattcatc
    15781 agaatattta gccatgccgg tattatgcgg cgtggttttt attttatgac ctgtgtttat
    15841 ttcgctatgt tcgtcaaaga ggcgttatcc gaatggaggc gaataaagcc ggtcgccgtc
    15901 ctttttttat tccgtaataa tgccgttgtc cgacaggaac ggagtatgta gatgtcacag
    15961 ttaatgacta actggatttg tatcgccacg gagggggaaa cggttgataa gcgggtcatg
    16021 aaaagacagt ggctcattga tgccgctgaa acttatgacc cgcaactcta taccgccctg
    16081 atttggccgg agcatgaaac atggttcggc aatatggggg aggtactggc attaaaagcc
    16141 gaagacggtg atgacggcct gctgcgttta ttcgcccagt tacacccgaa cagtcaatta
    16201 ttacaggcta accgggatgg tcaattgctg ttttgctctg tggagttaac gccagacggg
    16261 aattttcgtg gcacgggaaa aacctatctt gaagggctgg gcgtgaccaa taccccggcc
    16321 agcgtgggaa ccacgcggct acgtttcagt agcaaaaagc gcggccgttt attcggtgca
    16381 ttaaagccgc tggttattga tgaagtaaaa gaaatcaaag ggaatagcat ggcaagtaaa
    16441 tcatggcata gcctgtttgg tattaagccg aaggcgttcg ctgagggtga aggcgaaagt
    16501 aacgatgcgg gcggtgacga taaattgcag gcactggcgg aagcgctggc cgaactggaa
    16561 tcccgcgtaa ctgcgctgga aagtcagcaa agtcagacca ccgacgcagt ggaagccgtt
    16621 caggaagata tggacacggt aaaagaggtg gtggataccg aagattttgc cacgctgcgt
    16681 aataacctgc cgaagatttt gaataatttc ggcaagctgg atcgctctat tacgaaattg
    16741 ccacagcgtc aggttggcaa taaacccaaa gggtttaatt tcctgtaatt ccatttattg
    16801 ggtgatacct ctttttttat ctcgatatcg agaggacgca ttatgttttt aaatcagcgg
    16861 gcgcgggaat atctgagcgc ctacagtgtc ggtctggctc aggaatatgg ggtatcggat
    16921 accgcccgtt atttcgcgct gaccgacccg aaagaaaccc agcttcgcgc tgccctgctg
    16981 gagcgcgtgg atttcctgtc catgattaac gttctggatg tggatcaact ttccgggcag
    17041 gtggtgtcgg taggcagctc cgcactgcat accggccgta aggaaggagg ccgttttatc
    17101 cgtcaggtcg gcgtggatgg caatgactat aagctggtcg agacggattc ctgcgcggca
    17161 ctgccctggg atctgctgtc ggtgtgggct aatgcaggcg gcgaagacga gtttttccaa
    17221 ctggtacagt cgttttcgaa tgaagcgttt gcgctggata tgctgcgcat tggctttaac
    17281 ggtacccacg tcgccaaaag caccgacccg gacgaaaacc ctaacggcga agacgtcaac
    17341 attggttggc atcagcgcat gaagggtttc aaagacgggc agcaaattat cactgaccgg
    17401 gtagtgctgg atgaaggtgg cgattatacg tcactggatg cgatggcatc cgatttgatt
    17461 aacgccaaaa ttccccagca ataccgcaat gacccgcgtc tggtggtgct ggtcggggcg
    17521 gatttggtcg ccgccgaaca gtatcgcctg ttccagaaag ccgaccgccc gaccgagaag
    17581 atcgccgccc agatgctgga cagcaccatt gccgggcgtc ctgcgatggt gccgccgttt
    17641 atgccgggca agcgcatgac cgttaccacg ctgtcgaacc tgcatatcta tacccagcgt
    17701 aatacccggc agcgtaaagc tgaattcgtg gaagaccgca aacagtttga aaacaagtac
    17761 ctgcgcaatg aagggtatgc cgtggaatac ccggaactgt atgcctcttt tgatgaaagc
    17821 gccgtcactg tcggtaccgt ggccgagcct acggaaaaac cggccggagc gtaaccgatg
    17881 gccctgtcac ctgcgcaacg ccataacgcc cggatgtatg ccgagcagca gctatcccgg
    17941 tgccaggcgg tatctggcga tcacagcctg catgtgcaac tccgtgcgct ggaaaacgat
    18001 gtggcacggc tgcgcagtca gcccacgtta cgcgacaggg tagagatgaa acgccgggag
    18061 ttgctgccgc gctggttgcc aacggtacaa cgctatctgg acagcggcga ggtgtatcaa
    18121 aacacggtgt tcgcgtattg cgtggtgtgg ctgtttgatg tggaggagtt tgatcagggg
    18181 ctggcgtggg cagatatcgc catcgcgcag ggacagtgca cccctgacaa catccggcgc
    18241 acgttcgcgg cgtttgtcgc cgatacggtg ctggcctggg cgcagcagac ggcggacatg
    18301 gggcagagtg tggaaccgta tttttcccgc acgtttaaga acgtggcaga aaactggcgg
    18361 ctgcatgagg agatcaccgc caagtggttc aagttcgccg ggctgctact gctgcgtgat
    18421 gagcaggggc aaccacgggc gacagcggcg gcggatatcg acacgctgac ggcggcagat
    18481 gccttgttgc atcaggccga gcagttttac cgccaggttg gtgtgggcac gatgcgccgc
    18541 aatattgccg cccgcattcg ggcgctgcaa aaagaataaa agactaccgc aagccgggcg
    18601 ggcgcggctg aggcaatgca ccgggggtgc tatgtgccgt ggaagccggt cagcccgcct
    18661 ttttacgggg gatgtatgtt cagtggaaca ccggttgatt atcaggatga acaactggcc
    18721 aacaatggat tttggccaga cctgaacgtc agagattttc agtcacagcg caccattccc
    18781 gccgatttgg ctgctgatac cgtcgcacag gcgctactgg cagcggtggg cgaggtcaac
    18841 gccgatctgg ctgatgtcga ggcccgcaac cgggcgaagg ggtttgcgcg ggcacaggat
    18901 gtgccgggcg tcagtttgaa aggccagaac gtgctgtgtg cgcagtatca aaaagcggtg
    18961 tttgccaggg caaaagccga cttgctgggc gagtttgcca ccattggccg ccgtgagtct
    19021 catccgggac aggaggggga cgacacacgc aagggattgc tgggggaagc ggcgatggtg
    19081 atccgccgca tgaaagggct gaaacgggca acggtgcgga tggtatgagc aagctggatg
    19141 acctgaccac ctttgtttcg aagcatctgc cgccccgcgt gatgcagggg tttgacagct
    19201 tcatggatga agtgagcttt attcccgccc gccgtgacct gggcgaagac cagtatcaac
    19261 tggcggtgat gaagtttgat gccgtgttga gctgggggcg ctggccatac cgggtgtgtg
    19321 acccgcgcaa cctgtgcgcg ctgttactgg tctggcagga ggggcaggac gatctgccgt
    19381 acatggatgc cgggctggat atggagttgc ccacactgga tgtggacgtg cgcgatcagg
    19441 atagcgcgat tgtcgtggtg tcgctgcaac tggcggaatc actggcgatt gtggccgatg
    19501 acgacgggat aatcccgttt gaggggcggc gctggcgttt gaccagcccg gaaatctggc
    19561 aggccacgtc tgggcatctg ttcggtgcag gcggcgacgg ggcggaggtc ggggcgtcat
    19621 gattgtgcat ggcgagctga gccagtcaca actggccgaa ctgcgcaccg cattgcaacg
    19681 gctgacgctg ccacccaaaa aacgccagcg tttactgtgg cggctggcga aatacggggt
    19741 gattgcggcg gcgaaacgga acgtccgggc gcagcaggca ccggacggca gcgcctggac
    19801 ggcacgacgc ggccgccgcc gtggcaggat gctgcgcaat ctgcccaacc tgttgcatat
    19861 ccgcgaaatg ccagagattc aggcggtacg gatttatcta cagggcggtg cgtatcgcaa
    19921 cgggaaaacg ccggtaccgg cgggcgtggt gggctacagc cagcaaaacg gcatgagtgt
    19981 atccgtcaag cgttcacagg tcggcaatgg acgccctgag ccgggacgga tggccacacg
    20041 gcgacaggcc cgcaaactgc gggcgctggg gtaccgggta aaacgcgggg cgcgatggaa
    20101 aaagccgcct taccgggaga ttgaggaaac cctgagcttt gcacaggcgg gattactcat
    20161 ccgtaagttg agcggcaagg cggcaaaaac cgcctggaca gtggatgttc ctgcccggcc
    20221 atttttgggc atgaacgatg cggagtttac aaaagcgctg gcacggcagc tacagggcat
    20281 tggctttggc tgggatgtga aagcgcagga tatcaagggg taagcatgag ttggccaacg
    20341 gttcaggtta accaggtaaa ccagctacaa ggcgaaacca gcgagattga gcgcgtggtg
    20401 ctctttatcg gtgaggggtc ggtcgatgcg gtgaaaacag tgccggtgaa tacccaaagc
    20461 gatctggatc aggtgctggg ggcggcggac tcggtactga aacgtgacgt cagtgccgcg
    20521 atggtcaatg cggggcagaa ctggagcgcc tttgtttgtc tgctgccgcc aaaaggcgac
    20581 tgggtgagcg cggtcactgc cgcgcagcag gtggccagtg ttgaaggtgt cgttgtctcg
    20641 ttgcctgcca gcaaaaacag tatcgcccag gcggccagct tacggtctgc actggtgtct
    20701 aaatttggtc gctgggtgtg gtttctgctg gccgttgacg ggccgaaaga aggcgagggc
    20761 tgggacaagt atttacagag cctgagtaat ttacagaacg gcgccgcagc tccggcggtg
    20821 caactggtgc cgcggctgtg gggcaatgag ccgggtgtgc tggctggccg cctgtgtaac
    20881 cgtgcggtga cgatcgccga cagcccggcg cgggttcaaa ccggtgcctt gctggcgatg
    20941 gggcgtacgg atttaccggt ggacggtacc ggcgtgatgc tcgatctggc gatgttgcag
    21001 gcgctggaaa aacagcggta cagcgtgccg atgtggtatc ccgactatga cggctactac
    21061 tggtcagatg ggcgcaccct ggacgtggaa gggggcgact atcaggccat tgaaaacctg
    21121 cgcgtcgtgg acaaggtggc gcggcgcatc cggttgcagg cgattgccaa aattgccgat
    21181 cgcagcctga acagtacgcc gggcagtatc gccgcacatc aggggtactt tgccaaaacg
    21241 ttgcgtgaaa tgtcccgcag tacccaaatc aacggcatca cctttccggg ggaagtgaag
    21301 ccgccgaagg atggggatgt ggtgatcgcg tggcgctcta aaaccgccgt ggaaatttat
    21361 ctggttgtcc gtacttacga atgcccgaaa gggatcacgg tcagtctggt gctggatatg
    21421 tcgctggagg ggagcgcatg acaaaacgga tttcgggcca gtcgtttgac ttcaacatgg
    21481 acggcgcact ggttcacgcg gaaaaagtct cgctgagcat cacggataac accgccgccg
    21541 cgcagacgca gggcatcccc gatggctggg tggccggtga cgtcgccgcc gaaggtgaaa
    21601 tggagctaag taccaagagc ctggcggtgg tgacggcgaa agccagcagc gccgggtcat
    21661 ggcggggtat cgagccggtg gacttgatgt ggtacgccaa ggcgggcagc gaggaaatga
    21721 aggtggaagc cttcggttgc aagctgatcc tgagtgacat tctggatgtt gacccgaagg
    21781 gcggcagcgt gatgtcacac aagattaagt ttgtggtcac cagcccggat tttgtgcgca
    21841 tcaacggcat cccctatctg gaatcggaac tgacggaaaa gctgatcggc taaggacagt
    21901 catgcaggaa tacgaaaaga acgcgctggg gttactggtg ctgggggcgc tgatcgcgct
    21961 gggtaagctg ctggccagtg atgaaaaaat cacgccgcgc ctgtttttcg gccggatgat
    22021 tttgggatcg gccacatcaa tggcggccgg agcggcgttg ctgtgggtgc cgggattgtc
    22081 gccgatggcg gttaccgggc tgggtgcggc gctgggggtg gccgggcatc aggcagttga
    22141 aatctggttg cgccgtcgtg gcagtggttt gctgaaaggg agtgacgcaa aagatgacgt
    22201 taagtgaaaa acagcagtta tttactcaac tagtcgcaca gctgatccag tgggcgggag
    22261 agcgggggta tcgcctgacg ttcggtgagg cataccgcac gccggagcag gcgaagctga
    22321 atgcccgcag cgggtcaggc atcgccaaca gtttgcatac gcaacgcctg gctgtggatc
    22381 tgaatctgtt tatcaatggc gaataccaga cccgaacgga agcctatttg ccgctcggtg
    22441 aatactggga atcgctgggt ggatgctggg gcgggcgctt tacctctcgc ccagacggca
    22501 accatttcag cctggcacac aacggggtgc gctgatggat gggctatggc gggttgtggc
    22561 aggggtggcg gtggcctttg tcgctggttg gaaagcggcg agctggcagc gcgacagtgt
    22621 ggatttggcg gtgactcgcg ccgctaccgc cgccgctgag caatcacgcc aagcgttgca
    22681 ggcactggcg agccagtccg gcgcggcgct ggaatccaaa ctggaggcat tacgcaatgt
    22741 gccgaataaa accgtttacc gggagatcgt taagccggtt tttactaacg tgtgcctgtc
    22801 tgctgaattt gtcagcctgt acaacgacgc cgttaataac accgaacgtg tcttatcagg
    22861 aaaacctgaa aaagaaatgc ccggtcacta atctgccgcg cttattaggt atcaccggca
    22921 atgatgcggc gcagcagtta atcagttggc cgcaaattta tgcggattgt gccgcccggc
    22981 ataatcagtt aattgatgaa ataacccaac gggaaaatat gcaatgagca aaattacctt
    23041 atccgtttct ggcaaagagt tgtcgtttga gccgaatacc gtcgcctata acggcatgat
    23101 taatgatatg gctatggata ataaagtggc tccggcggtg acgtatcttc gccgtattgt
    23161 cgtagccaaa gataaagaaa cgctggatga attattaaaa ctgccgggcg cagcattgca
    23221 aattaccgaa gcggtgaatg cgcaatatgc gccgaagctg gaaattgaag taaaaaacta
    23281 acccagcggc tgcgggccat cgaaaataat tttcttgaac aggcattaac cctgcgacgg
    23341 cattatttac cggctgaaaa tgatgatgcc gataatctgg cccgcgccgt ctggctggca
    23401 aatacacact gggaaaatat gcgtatttcc gtggcgaacg ggattgcgct ggcattaaaa
    23461 ggcgattcat gaagcaactc gattttacat taagcctgat tgataagctg acccgcccgg
    23521 taaaacaggc gcaggcggcg gtcaccggct ttgcgaaatc gtcgcgggac gccttttcta
    23581 aaatcgcggt tggcggtgcc gggcttattg gtaccgctat gtctatccag ggggcgcttg
    23641 gcccggcggt agagatgcac ggcgcaatgg tcgaagcgtc ggcgcgtggc gtcgatgatt
    23701 ctgccttgca gaagattaat gccaacgcgc tgaaattcag cacccagtac gggcgttcgg
    23761 cgctggagta tgtgcaatcg accgcccgga ttaatgcagc ggtcggtacc ctgaccaaag
    23821 aggatttgcc gggggtagtc agggcatcca atgtgatggc ggcggcgctg aaagccacgg
    23881 cggacgagtc gtccggattc atggggcaga tgttcgccaa ctttcgctct gatgccgagt
    23941 caatgggtaa tgtgcagttt gcggagcaac tggccagcaa ggccgcctat atgcgtaatg
    24001 ccttcggtgt tgagctgggg gcgataaaag acctgatgga aggggcgcgt ggggtcggca
    24061 ccaactatgg cattggtatg gatgagcagt tggccgtgat gggcgagcta caacgcacgt
    24121 taggtactga agcctccagc gcgtatgaag gctttttgtc cggggcggtt aagggggcca
    24181 aaaagctggg gctgtcgttt gaagatgcca acggcaagtt actgaccatg ccggcgatgc
    24241 tggagaaatt gcgcgggaag tacggggcca gcattgaggg caatctgaaa gctcagtctg
    24301 atctggatga tgcatttggt gacagtgcgg cggtcattaa gcagttgtat ggcaatgtcg
    24361 gtgtcttgca gcagcatatc accgagctgg gcagcagtga cggtatgaag cgggccaccg
    24421 aaatggcgca gaagatggcc agcccctggg cgcggctgac ggctatctgg aatgctatcc
    24481 gcgttgcgat ggggcttact ttgctgccgg tgctctaccc gttgattaac aagatggcta
    24541 acgccgggca ggtattggtc aggtggctga cgctgttccc gaacattgcc agggtgatcg
    24601 gttattgcgt actggctgta ctcagtctgg ccggtgcggg ggctatcgcc aatatcgtga
    24661 tgggtgtttc tgtgtttgtg ctcggtggcc tgaaagggtt atggaaaggg ctaaccgcca
    24721 tcatgaaaat tcatgtcggt gttatctggc tgtataacaa ggccgtgctt gcgtgggcgg
    24781 caacgatgcg tattttgcgc ggtgtactgc tggccgttcg catggccagc ctgttaaccg
    24841 gggtggcatt caatatcgcg ctgtggcctg tgttgctgat tatcggtgct gtcgccttgc
    24901 tggtcgctgg gtgttatctg ctgatccggc attgggatgg cataaagaac gccattactc
    24961 agaccgacat gtggaaaacc gttacggaaa aggtgcaatg ggttgcggag atatttggtc
    25021 aggcatggca aggcatcgtt gacggatgga accgtgttgt gaatgcgatg ggtaatttct
    25081 ccctgtctga gacgatggga aaaatggttg atggcgtcgg ggagatcttt tccggtttat
    25141 gggacggtat tttagcgtcg ttcaatgcgt cttatcgctg gattgttgaa aagctaaacg
    25201 cgattccggg gatcaatatt gctatgcctg aatctgttcc ccgaccgggt ggtgagggct
    25261 tattaacggg cgggaaaata aaggggattg attcgggcgg attgcaacag gatatcagta
    25321 atagcaatgc gaagaattac accgacaaca gccggaaagt cgaaaatctg acgatttatg
    25381 ccaataaagg atttacctct gagcaattaa cggaatggga agcactgcgg taatggatga
    25441 cgtgaaatat attgacctgt taattacaga acgcgatttc agcctgaatg cggggcgtga
    25501 gccgatattt tgcaataacc ggatcagtat tggtcaggat tgcgttcacg ccattattga
    25561 aagcggactg accaccaaac tggtggccga gcgcagcccg acgctgcggg ccgatgtact
    25621 gacacaaatg attattctgg ttgaagacga tgaacggatt atccccggta cggtcgtggt
    25681 cagtgaagaa agcccgaccc ggctgtgggt gacggcggaa acctatgatt tcgggccgat
    25741 tacggccagg gtggacgtat gacggaaaag ccgaagattg attatgagca ggcgctgaaa
    25801 gaggccggga tgccagtaac ggccgagacg gtaacggaac agtttcaggc gcaagtgacg
    25861 gcatccggtc tggtcactaa cacatcgcgg atgtcgccgt tttggcggct gatctctgtc
    25921 atggtaacaa cgccggttat ctggctgaaa gacgttctga tcagcgtggt gctggccaat
    25981 atgtatctgg ctacggcgtc cggcccattc ctcaatctgt tcgcctgggg tgtcaatctg
    26041 tcacgcaagg cggctacggc cgctacaggt gttatccgtt tttataagtc ggatgcagcg
    26101 caggccgtgg tgatcccggc gggtacgctg attcagaccg aacgcattaa cggcacgatt
    26161 ttcagtgtgg cggtgtcagc ggataccgtg attaccgccg ggcaggccag cgctgacgtc
    26221 ccggtgactg ctactgctgc cggcggggca tttaatctgg cccccggtta ttaccggatt
    26281 ttgccggtgg gcgttgccgg tattgagcgg gtggagaatc aagaggactg gttactgacg
    26341 cctggggcgg atgaggaatc cgatgatgac ctgcgcgagc gttgccgtaa ccagttcaat
    26401 ctggtcggga attatcacac cgacgcggtg taccgcagca tgatagcggc ggtggccgga
    26461 ttgagcatcg atcggatttt ctttcagcat gacgccccgc gtgggccggg taccgccaat
    26521 gcttatctgt tgctggattc gggggtggta tcgcagccct ttattgatgc ggtgaatgat
    26581 tacatcacgg cgcaggggca ccacggccac ggcgatgatt tgcgctgtat ggcgctgccg
    26641 gaaacacagc acgatttaac cgtgacggtc tatgtacgca atctggtgaa cgtaacggat
    26701 gagacattag ccgcattgcg taccgggtgc caggacttga tccgcagtgc ttttcgggaa
    26761 aacaccgggt atgacgtgga aaagacgtgg ccctggtcgc gcttctcatt ttccaccctg
    26821 gcacaggaat tacacgacgc gtttccgctg attgcgtcac tggatttttc cctgggcgat
    26881 attgtcagcg ggctaagtgt gccgcgtctg gcctcgctga cggtggtgat aaccgatgcc
    26941 tgattttaat gaacaactgg cgggcttgag actgccatca tggatggata aaggcgaacc
    27001 tgccgctttg ttgaatgcca gcaaagctta ctggcagcag gtgaatgact ggttgcgctg
    27061 gccgttgcag caactggacg tcgatacctg tgcggagccg ttgctaaacg tgctggcgta
    27121 tcagcgcgac atttcccggc tgaaagggga agcgctcgac cttttccggc ggcgggtgaa
    27181 gtacgccttt gtgaatgcgc aggacgcggg cagtgtggcc gggtttatcg ctatttttga
    27241 gcggctgggg attggcactg tcaccctggc cgaacgtcag ccagggtatg actgggatgt
    27301 gatcctggtg cgtatcaacg atgagcagtt aagcaggtat aacgtcctga tgatgagtct
    27361 ggtcaggcag tacggccgca cctgccgccg ctatacgtat gatctctgga atggggaaac
    27421 ccagtcagtc cggggcgggg agtttgagca caacgcagaa tactaccacg caatcagttt
    27481 gatgccggtt ggaacggtaa cggcgcgtgt tgcgttgcgt tatgcgcgcg catccgcttc
    27541 gacagaatat tattcagcca acgtgtaaga gggattatgg cgcagagtgt gattacccat
    27601 gcgtttgaaa cgtggaatgt tcagcgggtt ttagatggcg tggcagcccg gcccgataaa
    27661 gtcgtttttg cgcggatacc gggtcaggat gaatcggtgc cggtagaccg aaacgaaggg
    27721 ctaccgcctg ctgatcagat tcagcacatc gccactatta cccaggccgg tatcctgaat
    27781 gaaaacgccg tggtttattc ggtggtgctg gataccaccg tgggggattg ggattacaac
    27841 tggatcggcc tgctggacag ccaaacgaat accgtgttga tgattgtgca tgtacgcacc
    27901 cagcagaaac tggcgacccg aaacggccag cagggcaaca gcctgacccg taatctcatg
    27961 atgcagtttg atggggctgc cgctgccaca caaatcaacg tgacagccga tacctggcag
    28021 attgattttt cagcccgtct ggcggggatt gatgagcgta tccgcattga aaatatggac
    28081 aggtatggtt catccgcgtt ttttggcaat gcatatcagg ttgtcaaaga tggcaatgcg
    28141 tatgttgtaa aagcgggggt agcctatgcc gctgggctta ggacttcgct gtcgagtgat
    28201 ctaaaaatta cggtggatgc attgccgact cgtgtctttc tggatgtgtg ctggcgtggt
    28261 gaattcacac aggcatgggc ggttgatagc cagatcgttg ttgccaactc ggcagatcat
    28321 gaaatacgtg atggtgttca gcactatttg cttcctgtcg cggatattga tgaaaacggc
    28381 aatatcaccg actggcgtaa acaaggaagc ctggcagaac aaaatgcgca gaccctctat
    28441 cttcataagg acgataatct ggccgcatta cgtgataaag aagccagccg aaaaaattta
    28501 gggttgggtc agcttgcggt aatggatacc gacacagcca gacaaacgct tcgtatcacc
    28561 caattagaaa atgaactggt aggtatcccc ttgccttatc ccggtgcaac agcccctgat
    28621 gggtggctga aatgtaatgg gcagtccttc aataaatcga tgtatcccct attagctggg
    28681 cgttacccgt cgggtttttt acctgacttg cgcggtgagt ttatccgtgg ctgggatgat
    28741 gggcggggcg ttgatgtcgg gcgcggttta ctgtctgcac agacccaggc tattcaagac
    28801 catagacacg ttggcacgat ggtaaacagt aatccgctac aaaccggtat gaataccggg
    28861 atcggtctgc tgtcccaata tacccctaca ccaacagtag gctattcaaa cgaaatcagc
    28921 agcggtggaa cggtggatgg gagtatagaa acacgcccgc gtaacatcgc ctttaactac
    28981 atagtgaggg ccgcataatg cgaaataatt cggtaatggc gaatgaaacc acgctggacg
    29041 aaaacgggca cgcggtatcg tctggctgga tcacggtcta tcacgttgat gcgtcaaccc
    29101 gcgaatactt gggaaacagc caggaatatc tgttggtcgg tacgggtatt ccggctgaca
    29161 gctatgcgga cacccccgaa ttacccggca ccggtcaggc gctatgccga acaactgacg
    29221 ggcaacaatg ggagtatgtg cctgattatc gtggggcaac cgcatatcac acggaaaccc
    29281 gagagccttt taccgtatcg tcgctaggtg agttacccgc gtttgccacg ttgcaggctc
    29341 cctcttccga gtttgacgtc tggagtggga aggaatgggt aacggataag gatgtgcaga
    29401 aacaggctga gattattgcc gctcaacggg atcaagggct gcgattggag acggctacca
    29461 cccgcatcca gatgttaggt gatgcggttg aactgaatat ggctaccgat gatgaggtag
    29521 cgacactgaa tgcctggaaa gcctatcgcg tattgctaaa tcgggtagat gtaaatgccg
    29581 ccccggatat cgactggccg gaggctccgg cggtatgaca tggcggcgcg ctgatatctg
    29641 cctgacgtcc gcactgccgc cggtgacctg ttcggtgttg ccggttcatc cgtgggtcta
    29701 tggcgtgggc aacgtgaccg acagcggtca ttatttaagc ccggtcaatg cggtgactta
    29761 cctggctgac aagttaggcg ctgctgcgga taacgtggcg gtgtgcgtgt ggatggtctg
    29821 cgggaacggg ctgggggaat ttctgcaagc gctggatgca ctaacggtgg ttttccccgc
    29881 tccggtattg agccaggttg cccgacaggc gcgggctatg gcggagttgt ccacggtaaa
    29941 gatgcaactc ccggctaaaa gccgcacgtt gcccgctgcg gcgctgttgt cggtggcgag
    30001 ctgccgtcag gcattgaatg cccagcgtat gtcggttgcc cagcagcagg ctaccgcgcc
    30061 gatggggctg gatgctctga aagggatggc agagcgcttc gcatcccagc gcgaggccgc
    30121 cttatcggaa atcagccagg ccatgcagca gatggcccag cgcagcgcgc cggcgtgggt
    30181 ttttaccggg cagggcgcgc cgggtgtgat cgcggcggag atgctgaaaa atattcccca
    30241 gccgtctgca atttataccg ctgccatgat gtttacaggg acagaactgg atgccttgga
    30301 gagcatgatc cgtgagccag ataattacgc tcgcccttga tggcgaagct atccccctgc
    30361 gtggcctgac cgtcacgccc tcaatgcaat ttgaagaaaa agaccagtcc gggcagacgt
    30421 ccagtacggc caacgcggaa cagggtatca agcccaaaga gctgcgtgtg tcaggcgtga
    30481 tcccgtttac cgaggcgaag gtgttaaccc ggctgtttgc cctggctgaa gccaaagagg
    30541 gtaataagct gaaacgctac cgggtggcca accctaccgc gcaggcgatc aatttccgac
    30601 tggctacctt taccgggtcg attgacgcac cgaagcagga cggcaagcaa gcctggctgg
    30661 tgacgtttac gctgcgggaa catatcagcg tatcggaaaa gcgggatgcc cgtgcaggca
    30721 atcagacaga aacgaagaag caggcaccgg gtaaggggag cgatgccggt gaaagtgatg
    30781 aacaactgag ctggtttgag cgcaaagtgc tgaaaccggt gaatgatgcg ttggggtaag
    30841 ccatgcgacc gattacacga ctgatgttat ccggtgatgc ggtacatgct gtagacgtca
    30901 atatggtact ggagttaaac gcctgcggcc ggggatttat cacagcggag acgcagcagg
    30961 actataccgg caagctggtc aggctggatg tgggctatac cgatctggta ttgcgctggt
    31021 ttaccggtta cgtcgaacga agccagccgg ccgaaaacgg ctatcagcgg ttatttgtgc
    31081 gcgaattggc gggcgtgttt gatcggatgt ggccgtgcgc atttcagcac ccaacgctca
    31141 ggcaactggc tgactggctg agtgaacaca gcgggttaac ggtgcatctg cctgacgccg
    31201 ggtatgtcag ccagcctatt ccgcatttta cccatagtgg cagcggtcac cagttgctga
    31261 ccaacattgg ggcggcgttc gggattgatg attacgtctg gcaaccgttg ccggatggtg
    31321 cgttgtatct cggcagttgg gcggattcgt tgctggccgg tgcgccggtt accatccctg
    31381 cggagttcag ccaggcgcag gccgccggta atagcatgac gttgccgctg atacagtcag
    31441 ttcggcccgg cgcggtggtt aaccagcaac gtctttcccg cgtgcagttg ctcaacgaaa
    31501 acatgacgat cgagtgggta ccggtgagca ctgtcacggg cagggcggca cagcgcagcc
    31561 ctgcccagcg tcagatcgac accgtttatc ccgaactgtc ggccggattg cacctgccga
    31621 agtttgcccg cgtggaagca ccatcagagg atgtcagcag cgggaatatc gccgaccctt
    31681 ttcggccccg ctatgcggtt gacctgcaat tactggatgc ggacggtaaa ccggcaaaag
    31741 atacgccggt atatccggcg gtaccgctgc cggtaccgat ggccgggagt gaggccgggc
    31801 tgttccagtt tccgccgccg ggtacgctgg tggaagtcgg gtttaccggt ggacggccgg
    31861 ataagccgtt tgtgcgtcag actgtggcca gtggtcagtc cctgccggat atcaagccgg
    31921 gggagcagtt gcagcaacaa cgggcggagg tttcgcagcg tgtgacggtc gccggggact
    31981 gggagcggaa gacggatcag gctatcaggg aatcgtcaat gcaccgggag gtgagcgccg
    32041 atgaggagcg gcgcacgctg gttaccaggg aaaccctgat taaagcggcg gataacgcta
    32101 cggtgctggg tacccacaca ctccaggccg gtgccatcgt gcaaatcgcc caaggggatt
    32161 acagcctggc tacgcaggcc ggttatacgg ccagtgtggg caagtcagcg acggtagagg
    32221 tagggcaatc gctgaccgag aaaatagggc aactgcgccg cagcattgcc ggtgcgcgtc
    32281 aggaactagt ggccccggtg gtctgggtcg gtagccaaca ggtcaacgtc atgacgctga
    32341 tgttggacac gctggacgtg attcaggaac tggcgacgca gacagccggc catacacacc
    32401 ctaacaccgg taccccgtta aatgcgggcg agatacagca gaccggccgc cgcaccggca
    32461 cactcaaaga caagtacagc ccgataatcg ggtgatcgat ccccacctac ccagcctgcc
    32521 gcgtgcgggc ttttttacgc ccctcacctg acgcgctcag cgggccgcta tgccacgccc
    32581 tttcccagtc atctcgccga catgccaacc cattgcgccg ctgcctgtac tctgctgacg
    32641 cagccagcgc accaacaaaa tgaacgctca catgacaaaa tcggcactac accgcacccg
    32701 cctgcggttt ttggatcaca aagatttttc agttttattt ttctacaaaa cctaacgcca
    32761 gcccgcgccg ccgctgggct tttgcggaag aatgcccact gaaaacagcg aaaggaattt
    32821 cagcgttttt cagttttttg gatcaagaaa ggatcgcttt gaaattgcaa ctgtaagaaa
    32881 taaaagggtt ttgtgtggat ttggtcagtt tgaatggatc tctgaatgtg agcaggcgtt
    32941 atcttgggcc accttgtttg cagcaatcat gcgggtttgg gggtggtgag gctgtttgca
    33001 ggaactgaaa agcggtgaac cccgccaggg cggggcgagg tgcttaaagt ttgccttcgg
    33061 taatcccaaa atcgacgatg ctcttacctt gcaggtcata ggtgcagttg tatgtcatcg
    33121 tgatttttgc gttgaacccg ttggtaaatt tcactttgtc accgatgaac gtcatttgtt
    33181 ttttggcctc gttcaggcgg aaatgtgaaa acatgggggt catcatgccg tcagtccact
    33241 cgaaatcata tttggatgac ttttctatca gagggcgaca gcgtgatgct gcttcaatcc
    33301 agtttttatc aaacaagcat tgaccgtcat ttgctgcgca attctttggg atatctgctt
    33361 ttgcggtggg cttgtcatca cttccgccaa agatttttat agctccccaa accagtaaca
    33421 ccagaactac aaaaccgccg atagcttgac ctgctgtggt accgggattc ttaacgccgc
    33481 agtgcgggca gacttttgca gaggttgata cttctttctt acattctttg cattttgtta
    33541 aagccataaa ccaagtccca tttgattcaa agaaactaaa taatatgaca agcaatgggg
    33601 gaagctacag agaaggctgc gcgtatgatg aaagcctgcc gccattttgt cgccacaggt
    33661 aataaaaaag gggttccgtt ttcacgtaac cccttgattt aattggtgga gctggcggga
    33721 gttgaacccg cgtccgaaat tcctacaccg tcggtactac atgcttagtc tggtctttac
    33781 attcgcttgc cagctgcgga cagacacgcc actaacaaac tagcctgatt ggatttaacg
    33841 cttcaacccc aggcagggca tccacgcgat ctcttttagg tttgacctct cttgatcccc
    33901 gtcctaagag cggaggctag ggagagagga caccttcagt ttcttaggct gattaagctg
    33961 ctaaagcagc aggtgcgaag ttttcgtcgt ttgcgactat tttttttgcg gctttttacg
    34021 aggccaaccg cccctcggca tgcaccttgg gtttcgcgaa tcccgtcgaa tccagaatca
    34081 gccccaagat attcttttat tataacagaa agatggcgta ctaagctagc gaccgttagc
    34141 gagcggcatt tttcatgatg cgcgctttat ccagcttcca ttcgcgctct ttgatatcgt
    34201 cacgcttgtc gtgctctttt ttacccttgg cgacgccaac cttgaccttg caccaggcat
    34261 ttttccagta cagcgacagc gccactaccg tatagccttc acgattgaca cggccgtaca
    34321 gcgaatccag ctcgcgctgg ttcagcagca gtttgcgggt acgcgtcgga tcgcaaacca
    34381 catggctgga ggcgccgtgc agcggtgtga atgtggcgcc gaaaaggtaa gcttcgccat
    34441 cacgcatcaa cacatagctg tcgctgatat tggctttgcc tgcgcgcagt gatttgactt
    34501 cccacccctg aagtgccaat cccgcttcaa tctcttcttc tatgaagtat tcatggcggg
    34561 cgcgcttgtt gagcgcaatg gtggcagaac cgggtttatg tgcttttttc tttgtcatag
    34621 tgccgtcatt atactggttg tcgtcgtgaa tgaaatccct cgccgggatt cataccgttc
    34681 tttgtgaacg ggtgcgatgc ccctcgcaga atttttgtct gaccgctcat cgatggtatt
    34741 attttgcgcg ttttatgaat cacggaaaat tgtatgccta aaatcagccg gtctgcgctg
    34801 gtcccgttca gtgccgagca gatgtataaa ttagtgaatg atgtctcgtc ttacccggct
    34861 tttctgcctg gatgcactgg tagccgggta ttgtcttcct ccaggagtga aatgacggcg
    34921 gcggttgatg tgtcgaaagc cggtatcagt aagacgttta ccacccgcaa tacgcttatt
    34981 gataatcaat gtattttaat gcaactggtg gacggtccgt ttcgtcagtt gaccggcgac
    35041 tggcgtttta cgccactgag cgatgaggcc tgcaaggtcg agctgaatct ggattttgaa
    35101 ttcaagaatg tgttgattga aatggcattt ggcaaaattt tcaaagaatt ggccaataat
    35161 atggtgcagg cgttcaccct gcgcgccaaa gaggtttatt gtgcctgaaa ttcgtgtcga
    35221 agtggtctac gcgttgccgg aacgccagta cttgcgatcg ctgacgctgg aagaagggag
    35281 tacagcggag caggctattc aggcttccgg cttgctggcc ctgcgcccgg atatcgatct
    35341 tggcgtcaat aaaatcggca tttttagccg cccggcgaaa ctgaccgatg tactcagcga
    35401 tggcgatcgg gtggaaattt atcggccgtt actggcggac cccaaggagt tacgccgtca
    35461 gcgcgcggaa cgttcaaaaa ataaggcacg gtaacgtgcc ttattttttc tgggccagcc
    35521 agagaggcta acctcaccgg gcctgttcac ttactgcgtc tgcaacgtgg gcttgttgtc
    35581 cacattagcc aacacgccct gactgttgaa ggtcagagtc agcgtttgct gtttcacggc
    35641 ttcgtgaccc ggttgctgac ggaagacgta gtaccaggtg tctgatccaa acggatcctg
    35701 cagcatgggg gtgcccaacg tgtagataac ctgttgtttg gtcattccgt tgcggatctt
    35761 ggcaacgtca gcgggtgcca gatagttccc ctgattgatg tcaggccgat agactacacg
    35821 ttccagagtg gaacaaccgg cagtcaacat aacaacaacc accgcggcga cgacagtcag
    35881 cgttttacag cgcatagtga ttacattcct taagggcata ggttgcagat gataatagac
    35941 cttgcctgac ttgaaaacct gcaagacgtc tgtaagaccg cgggaattcg aaaaagttga
    36001 gcctcactat gccgccagca attctctggc gtttgccagc gtgtttttgg tgacggctga
    36061 accgccgagc aggcgcgcca gttcctgcag acgttcgcgt ttacccagtg gctgcatcag
    36121 cgtttcggtc gccgcgccgt cggtgtgctt gctgacaaag tagtggtgat gaccgcatcc
    36181 cgctacctgc ggcagatggg tgacgcacat cacctgagta gattgcccaa gctgacgcag
    36241 catcttgccg acaatcgccg cggtcgggcc gctgataccg acatccactt cgtcgaaaat
    36301 cagggctggg gtatccatct tgcgggcggt aataacctga ataattagcg cgatacgaga
    36361 cagttcaccg cccgacgcca ctttgatcag cggctgatgc ggctgaccgg ggttggtagt
    36421 gacgcagaac tcaatgtggt cggcgccgtt ggcggtcagc gaatccggcg tgaaggtcac
    36481 atcaatcgtg aaatggccgt gcggcatcgc cagctcatgc atattggtgg tgatcaattc
    36541 cgccagttcg ccggcgtgct gactgcgtcg ggcgtgaagt tgttcggcca catgcagggc
    36601 ttgctggtgg aactcttgca ccgcgcgatt cagggtttca tgatcgcttt cctgctgctc
    36661 cagctgttgt tgttcctgca ataactgctg atgaaacgcg ggaagttctt ccggcgtcac
    36721 gtgatgcttg cgtgccagcg ttaactgacg cgacaggcgc tgttccagtt cgtacagtcg
    36781 gattgggtcc agatccatac tgtcacagta atggcgtagt tcgtcgctgg cctcgctgat
    36841 ttggatgccg gcctcttcca gcatggaaaa cacgccggag agtttttcat ccaggctcac
    36901 cagttctgaa agttggtgtc tggcgctgtg cagcatgctc agcaggtttt gatcttcgct
    36961 ttcgctgaga atctgcaacg tctgctggct gagggacatc agttgtccgc tgttggcgag
    37021 ccgcttgtat tcgacgtcaa tctgctcgta ctcgcccgac tggggcgcaa attcgttcag
    37081 ctctttgagc tgatattgca gcaattcccg gcgcgcttcc cgctcgatgg tggcttgctg
    37141 gagctgcgcc agttcgcggc agctttgatg ccactgctgc cagatctggc gcatggcgct
    37201 gagcagttgc gattcatcgg cataggcatc cagcagatgg cgttgatgtt ccggcttgag
    37261 cagcaactgg tgggcatgct gcccatgaag ctgaatcaga tgctggccca gttcgcgcag
    37321 ttgcgacagc ggcaccgccg tgccgttgat gaaggcgcgg gagcggccgt cggcgctgat
    37381 aacccggcgc agcaggcatt cattgttgtc atcaagctgg ttgtgttcga gccagcgcaa
    37441 cgcggccggg gtgtccgcca gcgaaaagcg ggcgcagatg tcggcgcggc tggcgccggg
    37501 gcgaaccatg ctggcgtcgg agcgattgcc gagacagagg ccaagggcgt caatagcaat
    37561 ggattttccc gccccggtct cgccggtaat gacgctcatc cctgcctgaa aatcaatttc
    37621 cagttcgcgc acaatggcga agttactgat tgtgagttgc gccagcatga tagtttcctg
    37681 tatgtaacaa caactgttat tacgtacagt atagactggt tttttgtaca gtaaagtagc
    37741 aagcgctact ttcagaataa ttttttcgac cagccgagct tgctgcttaa tgtattgaaa
    37801 taactgtaat tttcagggtg tattaggttc aggtgatact ggctgcgctg gattagcact
    37861 tcttcgcctt cctgtaccgg cagcgaaatc tggctgtcgc agctgatttc caggtcctgg
    37921 gtgatgtggg aaaacttcag ccggatagaa ctgctgctgt tgatcaccag cggccgcgcc
    37981 gacaaggtgt gtgggaacat cggcaccagc gcgatcgcat ccagcgaagg ggttaggatc
    38041 gggccgccgc cggatagcga ataggcggtg gagccggtag gcgtagagat gatcaggccg
    38101 tcggagcgct gggaaaacgc gaatctatcg tcaatataga cttcaaattc aatcatgtgt
    38161 gctactttgc ccgggtgcag caccacctcg ttgatggcgg tgctgctgct gttggggtga
    38221 ttagcgcggc acacctgtgc ttccagcata aaacgctgtt cgcggatgta acgcccggcc
    38281 agcacttcgc ttagctgttg ttgggtatga tccggatcga gatcggtcag gaaaccgata
    38341 ttgccgcggt tgacgccaat gacgttgata tcgtagcgcg acagcacccg cgccgcgccc
    38401 agcatgttgc cgtcgccgcc gaccaccacc gccaggtccg cctgctgacc gatttccgac
    38461 aggctgccgg tggcggcgtc cgttagctgc aactcgcggg cgatctgctg ctcgattacc
    38521 acgtggtaac cctgtgcgcg cagccagtga tacagcattt cgtgggtggt cagggcattt
    38581 ggatgacgcg ggtgaccgac gatgccaatg cagttaaacg atctgttcat ttgggtgcct
    38641 tatcctcatg agagcaccgg aggctcacgg tttttggacc gatagccgga ccaacaatat
    38701 gtgagtggtt cccttgaaac cccggttttg atccccataa taagcgaact agcgagatga
    38761 atgcgaaaaa cgcggagaat ttcatgagta gtaaagaaca gaagtcgcct gacgagcaag
    38821 tcttggatca aaagggagca gcggaaggtc agcaaacgga tgccgtgcct gagacgacag
    38881 atgtcgctga cccgcgtgat gagcgtatcg cagaattgga agcacagctg aacgatgttc
    38941 agcagcgtga acgtgaaagc gcgctgcgcg cccgcgccga aatggagaac attcgccgcc
    39001 gtgccgagct ggatgtggaa aaagcacata aatttgccct ggagaagttt gcgggcgaaa
    39061 tgttgccggt gatcgacaat ctggagcgtg cgctggagat ggcggacaaa tccaatgaag
    39121 cactgtcggg catgattgaa ggggtcgagc tgacgctgaa agcgatgctt tccgccgtga
    39181 acaagttcgg tattgaggta gtggcggatg tgaacgtgcc gtttaatccg gaaattcatc
    39241 aggccatgac cctgcttgaa tccgccgatc acgcgccgaa ccatgtcatg atggtgatgc
    39301 agaagggtta taccctgaat ggccgtttgt tgcgcccggc gatggttgcg gtgtccaaag
    39361 ccaaggaata atcgttttcc agctttctcc gggaagcggc cggcaggctt cttcccggat
    39421 gcgtgttgag tgaatcgact ctggtcggtc tttctcttcc tttatttccc ctggtatttc
    39481 cctcgccgct ctctcccggt gatttcacga aaacattttc ctgctactta tgcgtttttt
    39541 cctgacgtca tcacatggtc gttatttatc cgcataatgc cgtgccggtc gtttttttgt
    39601 ttatattttg ttaatcttta tgtattaaaa cgtgtgtcgt ttgtcgggtg aatgcatcat
    39661 tatcatagcc tatcagagca atcatcgttt ccattctaaa tgcacttgat aatcattatc
    39721 aactttgcga gagtaataaa acaatagtgt tagaagggtt actcatatgc cggggagtcg
    39781 tgtagtggaa tcagtcagcc gtacgtcaag gaagctcaag ctttcactga tggggccggc
    39841 ctttatcgcg gcgatcgggt atatcgatcc cggtaatttc gccaccaata ttcagtcggg
    39901 cgccgcctac ggatatcagt tgctgtgggt ggtggtgtgg gccaacctga tggcgatgtt
    39961 gattcaatta ctctccgcca agctggggat cgctaccggc aagaatctgg cggagcatat
    40021 tcgcgatcgc tttccgaaac ctgcggtctg ggcctactgg gtgcaagccg aaatcatcgc
    40081 tatggcgacc gacctggcgg agttcatcgg cgcggcgatt ggctttaagt tgttgcttgg
    40141 cgtgtcgttg ctggaaggcg cgattctcac cgggattgcc acttttctga ttctgacgtt
    40201 gcaacaacgc gggcaaaaac cgctggagat ggtgatcggc gggttgttgc tgttcgtggc
    40261 ggcggcctat atcgtcgagc tgattttctc tcgcccggag ctggcgtcgc tggcaaaagg
    40321 catggcggta ccgagcctgc ccaattccga cgcggtgctg ctggccgccg gcgtgctggg
    40381 cgcgaccatt atgccgcacg tgatttacct gcattcgtcg ctgacgcagc aacaaagcaa
    40441 catcacccgt gccgagcgct attccgctac caaggtggat gtcgcggtgg cgatgactat
    40501 cgccgggttt gttaatctgg cgatgatggc gacggcggcg gcggcgtttc acttcagcgg
    40561 caatacgtcg attgccgagc tggatcaggc gtatctgacg ctgaagcctt tgctgggtca
    40621 ggcggcggcg acgattttcg gcctgagtct ggtggtggcg gggctgtctt ccacggtggt
    40681 ggggacgctg gccggccagg tagtgatgca agggtttgtg cgcttccata ttccgctgtg
    40741 ggttcgccgc gttgtgacca tgctgccgtc ttttatcgtc attctgtccg ggatgaatcc
    40801 cacccgggtg ttggtgttaa gccaggtgct gttgagtttc ggtattgcgc tggcgttgat
    40861 tccgctgctg gtgtttaccg gtaaccgcga actgatgggg tgcctggtga acagccgccg
    40921 ggtacagaac attggtaaag tgatcgtctg tatggtgatc gcgctcaatc tgtatctggt
    40981 gctggatacg ctgctgggtt aacccactcg cttgtggttt gcgacgcctc cgccggtgat
    41041 ggtcgggggc gtttgttttt tccggttacg acttttctgc tttcatttac gatcacgtgc
    41101 attccggcag gctccgtcct attatctgag actgattttt ttgatacaga gattcaatga
    41161 tgttgtcgcc cattactgtt cttgataagc aactgttatc cgatcactgg tttgtgcttc
    41221 ataaatatgt gtttgattta aaacgtaaaa atggcggaat ggtgcgccag gtgcgggaag
    41281 tgtatgaccg tggtaacggt gccgccattc tgctttacaa ccgtgcccgg ggaaccgttg
    41341 tactgacaag acagttcagg atgccgacat acctgaatgg caatgaaagc gggatgctgc
    41401 tggaagcgtg cgccggtttg ctggatgatc agtcgccgga acagtgcatt cgtaatgagg
    41461 cgatcgaaga aaccggctac cagataggcg aagtggagaa gttgtttgaa gcctacatgt
    41521 cgccgggcgg aatcaccgag ctggtgcact tttttgccgc ggaatatgac gattcacagc
    41581 gtaaaaccaa cggcggcggc gtggacgatg aagatatcga agtgctggaa ctgccgttta
    41641 acaatgcgct ggcgatgatc aaggacgggc gtatccgtga tggtaaaacc atcatgctgc
    41701 tgcagcacgc acagattaac ggctggttcg ccaacgtgcg ctaacgacat ataaaactgt
    41761 aatatcaata tgatagatga caaggggccg acaggcccct tgttgtttgt ggctgaaccg
    41821 tgtttacaac cgggcggcca acagatcttc cagtttttgc tggtcggcgg cgaacaggcg
    41881 gatgccttcg gacagtttct ctaccgccat cggatcctga ttatgctgcc agcggaattc
    41941 ggtttccgac agcggcgccg gctgatggaa gccttcggtt gacgggctga gaatccgttc
    42001 caccggcgcg gtgctgtttt tcagctgttc cagtaacggc ggggcaatgg tcagacgatc
    42061 gcacccggcc agcgccagaa tctgttccac cttgcggaag ctggcgccca tcacgatggt
    42121 gcgatagcga tgctgtttgt agtactcgta aatacgccgc accgacagca cgcccgggtc
    42181 ctgttcggca tcgtagtcgg cggagggttg tctggcctga taccagtcgt agatgcggcc
    42241 gacaaacggc gaaatcagat agacgccggc ttcggcgcag gcgcgggcct gtgcaaacga
    42301 aaacagtagc gtcaggttgc agttaatccc ttccttttcc agctcttcgg cagcgcggat
    42361 cccttcccag gtggccgcca gtttgatcag aatacgtgag cgatgtacgt ctttttcctc
    42421 gtacatcgtc accagtttgc gcgctttagc cacacacatt ccgcgatcga acgacaaacg
    42481 ggcgtccact tcggtggaaa ttctcccagg aatgctcttc agcacttcgg cgccgatatt
    42541 gaccgccaga cgatcgccgg cgttgatgag cagggtttct ctggacccgc cctgctggtg
    42601 ggcgtaagcc agcgcatcgg caaacagcgg ctgataaacc ggcaaactgg cggcttttag
    42661 aatcagggat gggttggtgg tggcgtcctg cggtgaaaag tgacgaatag attcgatatc
    42721 gccgctgtct gccactacca cggtgaattg tttcaatgcg tctagttggt tcatggtttg
    42781 gctcccagaa gagaaaattg gcggaaccac cctgcaggat tctgtagcgc aatgacatgc
    42841 gttttttctg attgcagtca tcggcaggtc gatccccctt tgccttaaca caggctaagc
    42901 atagtcaatc tgtgtcgggc gtgctggtga caagggaggg tacagggagc gatatcatcg
    42961 gtatttggtg atgtttggcc gggaaaacag tcgttatggt gagtgatttt caatctcatt
    43021 aattaactat attaagcggt attccggcgt ggattttgta atgcttcatg gtttcgaaaa
    43081 tcacagacac ggtacactga gcgactcgcc accctaccca caaagcgata agacaaggta
    43141 ataaactatg gatgaacaac tgaagcaaag cgcactggac ttccatcaat atccggtgcc
    43201 gggaaaaatt caggtctccc cgaccaaacc gctggccacg cagcgcgacc tggcgctggc
    43261 ctattccccg ggcgttgctg cgccttgtct ggaaatcgct gaagacccgc tggcggctta
    43321 caaatatacc gcgcgcggca atctggtggc ggtgatctcc aacggtaccg cggtgctggg
    43381 gctgggcaat atcggcgcgc tggccggcaa gccggtgatg gaaggcaaag gggtgctgtt
    43441 caagaagttc tccggcgtcg atgtgttcga tatcgaagtg gacgagcagg atccggacaa
    43501 gctgatcgac gtgatcgcgg cgctggaacc caccttcggc ggcatcaacc tggaagatat
    43561 caaggcgccg gagtgcttct acatcgagca gaagctgcgt gagcgcatga agattccggt
    43621 attccacgac gatcagcacg gcaccgccat catctgtacc gcggcggtgc ttaacggcct
    43681 gcgcgtggtg gaaaaacaga tttccgacgt ccggctggtg gtgtccggcg cgggcgcggc
    43741 atccatcgcc tgcctgaacc tgctggtggc gctgggtctg aaacatgaaa acatcgtggt
    43801 gtgtgactct cgcggcgtga tctacaaagg ccgtgaagcc aacatggcgg aaaccaaagc
    43861 ggcttacgct atcgatgata acggcagccg ttcgctggcc gacgttattc cgaacgcgga
    43921 cattttcctc ggctgttccg gtccgggcgt gttgacgcag gatatggtga aaaccatggc
    43981 gccgcgtccg ctgatcatgg cgctggccaa cccggagccg gaaattctgc cgccgctggt
    44041 gaaagaagtg cgcccggacg ccatcgtgtg caccggtcgt tccgactatc cgaaccaggt
    44101 caacaacgta ctgtgtttcc cgttcatctt ccgcggcgcg ctggatgtgg gcgcgaccac
    44161 catcaatgaa gagatgaagc tggcctgcgt gcatgccatt gccgatctgg cgctggcgga
    44221 gcagagcgaa gtggtggcgt ccgcctacgg cgatcaggat ctctccttcg ggccggaata
    44281 cctgatcccc aaaccgttcg atccgcgctt gatcatcaag atcgcgccgg cggtggcgaa
    44341 agcggcgatg gagtccggcg tggcgacccg cccgattgaa aacttcgacg attacatcga
    44401 gaagctgacg cagttcgtct acaaaaccaa cctgtttatg aagcccatct tcgctcaggc
    44461 ccgcacccag ccgaaacgcg tggtgctggc ggaaggggaa gacccgcgcg tgctgcacgc
    44521 tacgcaggaa ctggtgtcgc tggggctggc gttcccggtg ctgatcggcc gtccgggcgt
    44581 gatcgaaaaa cgcatccaga agctgggctt gcagatcgcc atcggcaagg atttcgaagt
    44641 ggtgaacaac gaatccgacc cgcgcttcaa agcctactgg accgaatatt tcgagatgat
    44701 gaaacgccgc ggcgtgtctc aggagcaggc gcagcgcgac atgcgcggca acccgacgct
    44761 gatcggttcc atcatggttc accgcggcga agcggatgcg atgatctgcg gtacggttgg
    44821 taactatgaa gagcacttcg gcgtggtgga gaaggtgttc ggctaccgtg acggcgtgca
    44881 tgtggcgggg gcgatgaacg cgctgctgct gccgagcggc aacaccttta tcgccgatac
    44941 ctatgtcaat ccggacccga cgccggaaca gctggcggaa atcaccctga tggcggcccg
    45001 caccgtgcgc cgtttcggga tcgaaccgaa ggtggcgcta ctgtcgcatt ccagcttcgg
    45061 cacctccgat tcgccgacgg cgaagaaaat gcgcgccacg ctggcactgg tgaaccaact
    45121 ggcgccggaa ctgcaaattg acggcgaaat gcacggcgac gccgcgctgg tggaagcgat
    45181 tcgtcgtgaa cagatgccga acagcccgct gaaaggcgcc gccaacatcc tgatcatgcc
    45241 gaacatggaa gccgcccgca tcagttacaa cctgctgcgc gtctcttctt ccgaaggcgt
    45301 gaccatcggg ccggtactga tgggcgttgc caaaccggtg cacatcctga cgccgatcgc
    45361 ttccgtgcgc cgtatcgtca acatggtcgc gctggccgta gtggaagcac agaccgaact
    45421 gctgtaattc ggcgcgttgc cagtagcgaa aagaccaaac cggcagggta acctgccggt
    45481 ttttttacgc ctgttggcgt agccacttct ccagctcgtt ggcgaactgc tggcgttcgc
    45541 gctggcttag cgtagccggg ccgccggtct gtactccgct ggcgcgcaac gtatccatga
    45601 aatcccgcat cgtcagccgc tcgcggatgg tatccggggt gtagcgttcg ccgcgtgggt
    45661 tgagcgcgat cgcgtgtttt tccagtactt cggccgccag tgggatatcc gcggtgatca
    45721 ccaggtcgcc cggctgaacg cggcgcacga tttcgttatc cgctacatcg aatccggcgg
    45781 cgacgcgcag actgtgaatg tgcggcgaag gcggcgttct gagcggctgg ttggcgacca
    45841 gcgtcaggtg ggtcgcggtg cgatcggcgg cgcggtagag cacgtcttta atcacattgg
    45901 gacaggcgtc ggcgtccacc cagatggcgg tcatttgtgt gctcccgacg gcgtattcag
    45961 acccagccag tcacgggcgg gcaggaagtc gcggtacagc gccgcttccg ggctgtccgg
    46021 ctctggttgg tactggtatt cccagcgcac cagcggcggc agcgacatca ggatcgactc
    46081 ggtgcgcccg ccgctttgca ggccgaacaa cgtgccccgg tcccacacca ggttgaattc
    46141 cacatagcgc ccgcgacgat aaagctggaa ctggcgctcc cgctcgcccc acggaatgtc
    46201 tttgcggcga ttgacgatcg gcaaataagc gtgccggaaa ccttcgccca ccgcgcgcat
    46261 gaaggcaaag ctggtgtcga agtccggtgt gttgaggtcg tcgaagaaca ggccgccgac
    46321 gccgcgcgct tcgttgcggt gtttgaggaa gaagtagtcg tcgcaccact gcttgtaacg
    46381 cgggtagacg tcgtcgccga acggtttaca caaatcgaac gcggtctgat gccagtggac
    46441 ggcgtcttct tcgaaaccgt aatacggggt gagatcgaaa ccgccgccga accaccatac
    46501 cgccggttcg cccggttttt cggcgatgaa gaagcggatg ttggcgtggc tggtcggtac
    46561 atacgggttc aacggatgga tcaccagcga tatgcccatc gcctgaaaac tgcgtccggc
    46621 cagttccggg cggtgggtgc tggccgacgg cggcagcgaa gcgccggaaa cgtgagagaa
    46681 attcacgccg gcctgctcaa atacccgccc ctgacgcagc acgcggctgc gtccgccgcc
    46741 gccggaagca tgctgccagg cgtcttcgat aaacgtggcg gagccatcgg tcagttccaa
    46801 ctgccggcac aggtcgtcct gtaacgtgag cagaaagtgc ttgatcgcgt tgatgtcagg
    46861 tgagctcata atgtccctta tgattgaggt tgaaaggcgg ttgggcttat tccctggttg
    46921 attagtctta gtatatcgaa attcggcagc tcgcctatca ccggtcatgc cgccggcgag
    46981 aatcggcctc attgctgaaa agtgtatgac ggagatattg cgtctgcggt gaatcacggg
    47041 ataatcgggt atcacctatt gactctagat ggcgagcagc gatggaaatc cgcatattca
    47101 ggcaagatga ctttgaagaa gtgatcaccc tctgggaacg ttgcgatttg ctgcgcccct
    47161 ggaatgatcc ggaaatggat attgagcgca agctcaacca tgaccccgac ctgtttctgg
    47221 tggcggaagt cggcggtgag gtggtcggct cggtgatggg gggctatgac ggtcaccgcg
    47281 gctcggccta ctatctgggg gtgcatcccg attaccgtgg ccgcggcatc gccaacgcgc
    47341 tgattagccg tctggagaaa aaattgatcg cgcgtggttg cccgaagatc cacctgatgg
    47401 tgcgtcaaag caacacggcc gtcatcagca tgtatgaaaa gatgaattac gacatggtcg
    47461 atagcatcac gctgggcaag cgcctgattg aagaccagga gtattgaccg ctcccccttt
    47521 gaccgtgttt gcaatccgtc ggttgttgac ggggagatgc cgccttatct ccgtctgacg
    47581 ccgagcgcta tccctagcct gtcggctgca tttttccttt ctttttctgt ctctgtttct
    47641 gttcgcgcat ccgcgcaatg ttctcgctag cggttttcta cctgtcctaa aggtcaggtt
    47701 tgtgctggcg taatgtaaaa acaattgata ataggtttta tttgtaaaat aattctcatt
    47761 atctataaag ggacgtttct gcttgttttt gggatgggaa atcagggggc gccgctgttg
    47821 tcctgtccat gatttgatac ttatttctat aaataaaaca tggt
//
