# Supplementary material for: May the Phage be With You? Prophage-Like Elements in the Genomes of Soft Rot Pectobacteriaceae: Pectobacterium spp. and Dickeya spp
Source: Front Microbiol. 2019 Feb 14;10:138. doi: 10.3389/fmicb.2019.00138 (PMC6385640; doi:10.3389/fmicb.2019.00138)
Supplement: Supplementary file 2 [file Data_Sheet_2.ZIP › Supplementary_prophagesGENBANK_files/Genbank FILES _SRP_prophages/phiDdd2.gb]

LOCUS       Exported               35297 bp ds-DNA     linear   UNK 10-SIE-2018
DEFINITION  phiDdd2.
ACCESSION   .
VERSION     .
KEYWORDS    phiDdd2
SOURCE      phiDdd2
  ORGANISM  phiDdd2
REFERENCE   1  (bases 1 to 35297)
  AUTHORS   .
  TITLE     Direct Submission
  JOURNAL   Exported piatek, 10 sierpnia 2018 from SnapGene 2.7.3
            http://www.snapgene.com
FEATURES             Location/Qualifiers
     source          1..35297
                     /organism="prophage phiDdd2"
                     /mol_type="genomic DNA"
                     /note="/genome_id=6666666.356851"
                     /note="/genome_md5=;/project=robertczajkowski_6666666"
                     /db_xref="taxon:6666666"
     CDS             1..312
                     /codon_start=1
                     /product="Phage holin # possibly family II"
                     /label=Phage holin # possibly family II
                     /note="Phage holin # possibly family II"
                     /db_xref="SEED:fig|6666666.356851.peg.1"
                     /translation="MNETDKSIVSLFIIGTLIAAGKVLAGSEPITLRLFIGRVMLGGFV
                     SMMAGIALVQFPDLSPVAINGIGAALGIAGYQTIELLIQRRVRQLGKKNTPEKNNDAQ"
     CDS             302..790
                     /codon_start=1
                     /product="Phage lysin, 1,4-beta-N-acetylmuramidase (EC 
                     3.2.1.17) or lysozyme #Protein S in phage lambda"
                     /EC_number="3.2.1.17"
                     /label=Phage lysin, 1,4-beta-N-acetylmuramidase
                     /note="Phage lysin, 1,4-beta-N-acetylmuramidase"
                     /db_xref="SEED:fig|6666666.356851.peg.2"
                     /translation="MLNNPNLIAFLDMLAFSEGTATHPLTRNRGYDVIVTGIDGKPEIF
                     TDYQDHPFANGRPGKIFNKQGQRSTAAGRYQQLYRYWPAYKTQLALPDFEPDSQDTLAI
                     QLIREQRALDDIMQGRLTSAITRCNNIWASLPGAGYGQREHNAERLIAVYQQAGGKLA"
     CDS             787..1227
                     /codon_start=1
                     /product="Phage spanin Rz #LysB"
                     /label=Phage spanin Rz #LysB
                     /note="Phage spanin Rz #LysB"
                     /db_xref="SEED:fig|6666666.356851.peg.3"
                     /translation="MKNAMIIAAIMMALSAGVGVQFWRLQNARQLTEQQAQTLSLQQIA
                     LDEKSGQLKALSEQAERNNLEQARLRDMAAETQAALSERQKVVMRLQHENDALKRWADT
                     DLPADIIRLRQRPAFAGGRAYREWLPQTDALPVPGGQSANQR"
     CDS             1283..1402
                     /codon_start=1
                     /product="hypothetical protein"
                     /label=hypothetical protein
                     /note="hypothetical protein"
                     /db_xref="SEED:fig|6666666.356851.peg.4"
                     /translation="MDAIIACQAKSDATPGATVASGKQTGKQDSTGIGTPAPQ"
     CDS             1399..1737
                     /codon_start=1
                     /product="hypothetical protein"
                     /label=hypothetical protein
                     /note="hypothetical protein"
                     /db_xref="SEED:fig|6666666.356851.peg.5"
                     /translation="MNSPLRQGKPLKKTLGSDVSDWDVRATEPGNRGIPIQVGRSCFHP
                     KSARVFSDAVWSLSENSLHIPLYGNTGKKTGLEVAPCSHFDPVVTLLQWVCRGGNKKPP
                     EGGHDASR"
     CDS             complement(1738..1935)
                     /codon_start=1
                     /product="hypothetical protein"
                     /label=hypothetical protein
                     /note="hypothetical protein"
                     /db_xref="SEED:fig|6666666.356851.peg.6"
                     /translation="MLKNYFYDQHDVARSDEEKREIVVSAILEIIKEGASESGVQVALD
                     AIRTRITQTADIIQRALEND"
     CDS             complement(2663..3670)
                     /codon_start=1
                     /product="Phage integrase"
                     /label=Phage integrase
                     /note="Phage integrase"
                     /db_xref="SEED:fig|6666666.356851.peg.7"
                     /translation="MAVSKLPSGKWLCQCFPYGRDGQRVRKQFATRGEALSYERRLMAE
                     KKGISTETNSTTLQDLIQRWYDMHGQTLESGEDRYSKLMAICVRLGNPFAIDVDKNMFA
                     VYRERRLKGEWNPKGKTAIKEATVNREYSYLRAVFSELKRMGEWEKENPLDGIRQFKEG
                     DQELAFLYPDEIKRLLAACDESENKDLGIIVRLCLATGARWGEAQTLKQSQILPGRITF
                     VKTKGKKNRTIPISERMHALLPKRRGQLFKPAYEAFKHALKKAHIELPEGQLTHVLRHS
                     FASHFMMRGGNILVLQQILGHSSITMTMRYAHFAPDHLDAAVTLNPFDSLTTDE"
     CDS             complement(3677..4561)
                     /codon_start=1
                     /product="hypothetical protein"
                     /label=hypothetical protein
                     /note="hypothetical protein"
                     /db_xref="SEED:fig|6666666.356851.peg.8"
                     /translation="MADEKLDVFNYKRNKDKLLINLINIIEGINSDGHIDEKEVLFLDT
                     WIKNAELISKNYCVRMISNRLSDILADGIIEQHELRYLKADLIKVQKELSDLPELDLYS
                     DEADKHLLEGLCKGMMANHELNDSEIRYLNWWLSSNAALKANYPGKELYALVNRILADG
                     IITSEERDELKKALIAFTGSDVDSGVVDGLATRLPVDDIDSLVLANTTVCLTGEFLYGK
                     RSVCKKLIEDAGGNVIDNITAKLDFLIIGTLSCKHWRYQAHGRKIEKAIDYRDNRGIPL
                     KIISEEQWQSFTG"
     CDS             complement(4659..5837)
                     /codon_start=1
                     /product="hypothetical protein"
                     /label=hypothetical protein
                     /note="hypothetical protein"
                     /db_xref="SEED:fig|6666666.356851.peg.9"
                     /translation="MTFEEWISKTEKEIFFTYINANNEVSNNYVVDAVYKDNYLQGYCI
                     NKKGFRTFKLERIMDVYSSNEEMVSAASPLAIADLKIESRRVKDTPRGLEICFTGFDKD
                     IKDELESLAEKKGLLVRKGITAKLYFLCCGPNAGWKKIKQANEKNCFILSKDQFFSFVD
                     TGEIPIEPTEVYESDEKDIHEKIEILHNEVTSTFRTIREPRRSSALIARFVDGYAAGWR
                     FAIKESHRNALDIKLTKFVFNKYQYEDWTQGSSFSFGRGDVFYSDKLGYIEWSEFLKTP
                     DAVMLQVKYECFSGYDPVARIDGFFSGDFIPYNQLTPKKLTNLPIMIDSQSYDPGKITL
                     DIFKPSIDRSKFDLFDTVRITQDELISLLQSGYYWNKDEGKKPVRVNLFGDN"
     CDS             complement(5917..6528)
                     /codon_start=1
                     /product="hypothetical protein"
                     /label=hypothetical protein
                     /note="hypothetical protein"
                     /db_xref="SEED:fig|6666666.356851.peg.10"
                     /translation="MSVESHGNENRVAGRDFYESSITVDKINIAIPAANEEKRPLVPAQ
                     RKQLNQLVKEIADGGYEEGFSVWQRVHAEIGVKSIEDMTVNQYQTAVSYLQALRDRYRE
                     KDASNALVHLLLKNTQQVDQRQQLIHYCHIHFGTGRLTELTRSQLQQALSWLDDRQCSS
                     VPGQTTPNTRQSWQEVLKAEPLVFSAVFVAGIILGAIFFR"
     CDS             complement(6544..6930)
                     /codon_start=1
                     /product="Transcriptional regulator"
                     /label=Transcriptional regulator
                     /note="Transcriptional regulator"
                     /db_xref="SEED:fig|6666666.356851.peg.11"
                     /translation="MENYIGTRLREERERLGLSQVAMGDIGGVKKLTQLNYEKGDRMPD
                     AAYLNAVSKIGVDVQYVVTGVRSAATLTDEEQQLLGNYRTAPLTVKAAVLAALTAGSSV
                     STGSINVTGSGQRVAGRDYHENKK"
     CDS             7077..7202
                     /codon_start=1
                     /product="hypothetical protein"
                     /label=hypothetical protein
                     /note="hypothetical protein"
                     /db_xref="SEED:fig|6666666.356851.peg.12"
                     /translation="MRLSEDERARLAALAEKESRSLSSMARLVFLRGLESFNAEG"
     CDS             7208..7420
                     /codon_start=1
                     /product="hypothetical protein"
                     /label=hypothetical protein
                     /note="hypothetical protein"
                     /db_xref="SEED:fig|6666666.356851.peg.13"
                     /translation="MSKALTINITVPTAYVSLRKYSELTGIPFETCRGMVKSGKIIIRP
                     KEKANEKVEVNLVAMLRDAITSSEI"
     CDS             7868..8140
                     /codon_start=1
                     /product="hypothetical protein"
                     /label=hypothetical protein
                     /note="hypothetical protein"
                     /db_xref="SEED:fig|6666666.356851.peg.14"
                     /translation="MKINHNPEIWLQAADDAAESFLSQPTDVRESGSDNSYTRINVLSS
                     LEALADAVYYLNHNLCIFIKNRANQWYRDGMMHAPEFAINWAKKG"
     CDS             8145..8486
                     /codon_start=1
                     /product="Phage protein"
                     /label=Phage protein
                     /note="Phage protein"
                     /db_xref="SEED:fig|6666666.356851.peg.15"
                     /translation="MANTESARAIPLSIAERTEGLNHIAMLRGKYFKTNSEKEMCRFID
                     DMRDKIDDDYYKNMRVLSAIFELADIDKERHHLKFNELTTDEKERLIKAMNKLRAVVSL
                     FPKNLILPL"
     CDS             8551..8781
                     /codon_start=1
                     /product="hypothetical protein"
                     /label=hypothetical protein
                     /note="hypothetical protein"
                     /db_xref="SEED:fig|6666666.356851.peg.16"
                     /translation="MKDVEVKTMTVANDGALVELLKKARLEERKDQHFSFSLRLAALAV
                     RAQQRDLSAAEVVELIRQESERFEHSAQGLS"
     CDS             8796..9005
                     /codon_start=1
                     /product="Phage protein"
                     /label=Phage protein
                     /note="Phage protein"
                     /db_xref="SEED:fig|6666666.356851.peg.17"
                     /translation="MAQEREAFIRETQIQHARQQSGFTVSAFVCESCDAPIPEARRVAV
                     PGVRLCVYCQGDAELKNKHYRGAL"
     CDS             9002..9958
                     /codon_start=1
                     /product="Methyl-directed repair DNA adenine methylase (EC 
                     2.1.1.72)"
                     /EC_number="2.1.1.72"
                     /label=Methyl-directed repair DNA adenine methylase
                     /note="Methyl-directed repair DNA adenine methylase"
                     /db_xref="SEED:fig|6666666.356851.peg.18"
                     /db_xref="GO:0009007"
                     /translation="MSIIATPLKWVGSKARVMDILSEHLPAGNRLIEPFAGSCAVMMNT
                     NYPEYLIADINPDLINLYQVIKEDAKDFIDTAEGLFRTANTAESYYRFRQVFNRSKENR
                     ITSAALFLYLNRHGYRGVCRYNRAGGFNVPYGHYASPYFPLAEIQALAEKSRRAKFICA
                     AFGETLQLTRPGDVVYCDPPYIPQTPTANFTSYHTDGFTHNDQYDLCSALSSLAERGIT
                     VIASNSDTHHAHSLYHRFDICRFTAPRSVGVAAGEGKQAGEIIAKRLPVSAARSMSKVC
                     DGCEHEGGGHCPDCGPAMGDATYQEMVASGALNEEPF"
     CDS             9958..10995
                     /codon_start=1
                     /product="DNA-cytosine methyltransferase (EC 2.1.1.37)"
                     /EC_number="2.1.1.37"
                     /label=DNA-cytosine methyltransferase
                     /note="DNA-cytosine methyltransferase"
                     /db_xref="SEED:fig|6666666.356851.peg.19"
                     /translation="MQPLAYYNEIDKFAAQWLRNLIDAGHIAPGIVDTRSIEDVTPNDL
                     KGFSQYHFFAGIGVWSYALRRAGWPDSRPAWTGSCPCQPFSAAGKKGGVADERHLWPSF
                     FHLIQQCRPDVVFGEQVASSDGRAWFDTVQTDMENVGYACAALDLCAAGVGAPNIRQRL
                     FWVADDQRSGLRSSSSECVNSVQFDQKATADAGTCCGVDGMDNAVRIGRETGRDRYHTG
                     YDWQQLGTTGESCRVAHANGNKQRQGGETGECNECTPLGRQQDPTAASGLCGDMRPLEV
                     NGFWRDADWICCRDGKWRPVESGSFPLANGVTGRVGRLRAYGNAINAEVATAFVSAYMG
                     RADNA"
     CDS             complement(11072..11197)
                     /codon_start=1
                     /product="hypothetical protein"
                     /label=hypothetical protein
                     /note="hypothetical protein"
                     /db_xref="SEED:fig|6666666.356851.peg.20"
                     /translation="MIQLCYGLIKIPVITWRCQSAFNHPAQMPCDGRMRFSIGNE"
     CDS             11189..13528
                     /codon_start=1
                     /product="Phage replication protein # Replication gene A 
                     protein"
                     /label=Phage replication protein # Replication gene A
                     /note="Phage replication protein # Replication gene A"
                     /db_xref="SEED:fig|6666666.356851.peg.21"
                     /translation="MDHREPNGTQLRIRRGLAEIVRRDYQKTLSDWMKTPEGVEARLHE
                     QPFFIRDVYRQKIEWLRANREPRHISAFFMGTVKKALLRLDAVRAQQGVRDGFTSELAA
                     YWGPRWAYLAGFTKHEVINAAHTLAAAIAEMFETECGHTSPEDMTDDEIQWLYRHLGRE
                     LLALRVTPPCWGLVIGDQQARHRIYSAILRITSPEWWGRKLWRLRCEWRENQFRAIGVI
                     HKKRMPYVSLDALNLWQEQRRKNRAFFQTHELVDEDGNIASLENMVYGSISNPAIRRHE
                     LMTRMAGVEMVAIARGDEGVFLTITCPSRYHANIQNGHRNPKWDHTSPRQGQRYLCCTW
                     ARAMSALNRRGLRPYGFRVAEPHHDATPHWHVLLFMPPADRKAITDILREYFIAEDRAE
                     LGRNTGARFKAKKLDPRKGSATAYVAKYISKNIDGYALDGELDNETGKPLRETAKFAMA
                     WASQHNIRQFQPFGLPPVTVWRELRRLANQLTAAQKENGTFKRGAAQLADPAMDAVLAS
                     ADAGCFATYIEKQGGVLIPRERYTVRIAYEDADEQNTYGETPEKIFGVFSPRLGAISRI
                     CTRLIKWKIRKKQAIDDGASISTGSGLAVTSPTGDAWSSVNNSTGDEKTAIPSGIDGDD
                     YGRCELPDGEPGDTSAQTFADFERMTDPERRALLSRLRTQPPDRRNNQHSSTTQRNKPV
                     EKQVVVNIPDEWRASIADFALSIGWDVSIGEASRLAAGHPIDFCGHRYYARRNGELYRE
                     AEKQQVDKAGLMQRVAALRELSQRKD"
     CDS             13626..13877
                     /codon_start=1
                     /product="hypothetical protein"
                     /label=hypothetical protein
                     /note="hypothetical protein"
                     /db_xref="SEED:fig|6666666.356851.peg.22"
                     /translation="MIWSKKALKQRLTIDKRYQTAISEKVTELENFPAVRLDIVPLKGK
                     EGAFRLRVGDYRIIFQITKGEPVICEIKEVKRRTSTTY"
     CDS             13951..14319
                     /codon_start=1
                     /product="FIG043818: putative DNA binding protein"
                     /label=FIG043818: putative DNA binding protein
                     /note="FIG043818: putative DNA binding protein"
                     /db_xref="SEED:fig|6666666.356851.peg.23"
                     /translation="MSKLQYINDVNGNPQFVVLPIDVYESLLSNDDSGYESIPYAADEH
                     DDETVPNEVVNIMFRDDISLLAAWRVYRGLSQYDVAERLGTTQSAVSQWEAKDSRPQKK
                     TRQKLAELYGCRPEQMIL"
     CDS             complement(14772..15824)
                     /codon_start=1
                     /product="Phage-related capsid packaging protein"
                     /label=Phage-related capsid packaging protein
                     /note="Phage-related capsid packaging protein"
                     /db_xref="SEED:fig|6666666.356851.peg.24"
                     /translation="MSRKKKTGTHLAVTTGQPDMADALKSDSGLSAFTFDGPYPVRDGY
                     DLLDNMYCADNGRYYDTPVDLYGLARAFGSASWHQSALYFKRNALTGCFIPHPLLSRQA
                     FSAFVLDWFVFGNGYLERRVNRLGGVLSLRHVPAKYTRRGSDLDTYWFIRQWKDEHAFD
                     TGSVCHVINPDIHQEIYGMPEYMGALLSASLSHSADMFRKLYYDNGSHAGCIIYIGASQ
                     VDNESMEGVKKTLKEARGKGAFKNLLLHAPGGGDKGVQIIPFSQISAKDEFLNIKSVTR
                     DDILAAHRVPPQLMGAMPEGNGSFGDVEKAARVFAINELMPVMEALKHVNDWLGMEVIR
                     FNPYALLKAE"
     CDS             complement(15824..17551)
                     /codon_start=1
                     /product="Terminase, ATPase subunit"
                     /label=Terminase, ATPase subunit
                     /note="Terminase, ATPase subunit"
                     /db_xref="SEED:fig|6666666.356851.peg.25"
                     /translation="MIQDAFVRQRAKQLYWQGYPPAEISRLMGINQNTVYAWKKRDEWD
                     ETPPIQRVTHSIDARLCQLAQKPTKTGGDLKEMDALTRQLKTLNDGQLGNAAGGKKPRK
                     RKVKNHFTEEQIAALRTNILDSLAWHQNGWYAQQDQRNRMLLKSRQIGATWYFAREALL
                     RALRDDVAYPYQRHQIFLSASRRQAHQFRGFIQKVAEEVDVELKGGDKIVLSNGAELHF
                     LGTSAATAQSYTGNLYFDEFFWVSNFANLRKVAGAMATLKGLTRTYFSTPSSETHEAYP
                     FWTGARWNEKRSKAQKVAFDVSWKALNSGLLCPDKTWRQIVTLQDVIDHGWEYTDLEEI
                     RDENSPDEYNNLYGCEFVRDGESAFNLNLLFSCGADGYDEWPDWKPFASRPIADRGVWI
                     GYDANGSSGNGDSGAISVVVPPLVAGGKFRTIETQQIRGLEFEEQAKVIEALTFKYNVQ
                     HIAIDGTGIGEAVYQIVKKFFPAAVCFLMSVSSKRALVLKMLQVIRAGRWEYDRSEQAL
                     INAFNAVRRAKTPGGIMTYDTDRARGSNHGDLAWATMLAVINEPLGQEQGGGGFAMEF"
     CDS             17710..18549
                     /codon_start=1
                     /product="Phage capsid scaffolding protein # Fam Scf032"
                     /label=Phage capsid scaffolding protein # Fam Scf032
                     /note="Phage capsid scaffolding protein # Fam Scf032"
                     /db_xref="SEED:fig|6666666.356851.peg.26"
                     /translation="MSGTAKPTRKKFRVAVSGSTVDGREIGRDQIYAMAESYNPQVYGA
                     RVNVEHILSPYPGSDFGAMGDVEALSAEDITDGPLKGRAALYAEIEPTERMKQLTGEGK
                     KIYSSIEIDPQFAATGRPYLRGLAMTDTPASLGTERLKFAAQQRAQVQAFNNLPGEPVM
                     FTEAMEAELVELSEQRNDEGKQWFSRVMGIIGKGRKSEGEQFSQVREAVENVAQSHADL
                     LDNFNALKNQQQQNSRTIQTLTSELAALTQKLATQDNSYNQRPAASGGNSGAQLADF"
     CDS             18575..19630
                     /codon_start=1
                     /product="Phage major capsid protein #Fam0066"
                     /label=Phage major capsid protein #Fam0066
                     /note="Phage major capsid protein #Fam0066"
                     /db_xref="SEED:fig|6666666.356851.peg.27"
                     /translation="MENSTRNLYNQYISRQAQLNGVQPNDVAMTFSVEPAAQQRMEQAA
                     QESDEFLKQINVFGVKAQEGQKILIGSKGPIASTNNSSDGTSRRNPTDNHSKEPNTYHC
                     RKVNYDSAISYPQLDAWASQPNFQALISQANAQQIGLDRIMIGFNGITYAEKSNRSANP
                     LLQDCGVGWLQKTRNDAAHRIIKNVTLTARDEDNKIIAKGTYGNLDTAVFDAKNSLLDP
                     WHRKAPDLVVIMASDLLTSSNFPRLNALSQSNPNTELLAGQLIVSQERVGGLPTFLAPY
                     FPSNAVLITSFKNLSVYYQLGALRRSIAEEPEYNRISTYQSSNDDFVVEDYGKVALIDG
                     IQFAQAAGDGQ"
     CDS             19710..20555
                     /codon_start=1
                     /product="Phage terminase, endonuclease subunit"
                     /label=Phage terminase, endonuclease subunit
                     /note="Phage terminase, endonuclease subunit"
                     /db_xref="SEED:fig|6666666.356851.peg.28"
                     /translation="MAERRGQADTETEVSRTAHEQILHRLRLHQAALKQVQSDATKAEM
                     KKAMLPEYDGWIDGTLEGDSGRQDEVIVTLMVWAIDCQDNALALKLGRYVVKHGLSLPA
                     DKFRRDAVTVLAEEVSNPVLTLATTDADADLSGYTAVLDEVAAIVDGKDMPDEVRAKLC
                     KARAFSRRAAVDAPTKGEALKLFREAMARNPNAGVKRDIATLTRELKKLMPASSNEPEE
                     GAPGDDEAATEPPAGETTPATPTDAAQPAAKQAAVRNTTARKTTRTTGKSKAARQSAKR
                     "
     CDS             20654..21145
                     /codon_start=1
                     /product="Phage head completion-stabilization protein"
                     /label=Phage head completion-stabilization protein
                     /note="Phage head completion-stabilization protein"
                     /db_xref="SEED:fig|6666666.356851.peg.29"
                     /translation="MSLVASKRVSDSGDVPEIDDGAAAVSAGEFWPVIVLRDLRLAARI
                     TGGITTTRLMHVTTEAVVHVTDQLAGWQQAQQAAGYAALADVPAGQVNGESIKVYRFKR
                     AVYAIARALLLEGYRDVDTTAKGDKATDTFDSQRDDLWRDARWSIADIRGAQRLFAELC
                     "
     CDS             21139..21345
                     /codon_start=1
                     /product="Phage protein"
                     /label=Phage protein
                     /note="Phage protein"
                     /db_xref="SEED:fig|6666666.356851.peg.30"
                     /translation="MLMVVRALQGDTVDLLCYRHYGTSAGVTEQVIAANPGLSRQMFLT
                     AGQAITLPDIPRQTEQETVQLWD"
     CDS             21336..21638
                     /codon_start=1
                     /product="hypothetical protein"
                     /label=hypothetical protein
                     /note="hypothetical protein"
                     /db_xref="SEED:fig|6666666.356851.peg.31"
                     /translation="MGLNDLQRLNDGVTYGLSVMVTGIGVMTVSEKVALAGLVIGVVTA
                     WRAWLFRRRIERAQRRRNELIEQILQQSERRPLNASERRAVAILHQGDVDDESRD"
     CDS             21622..22167
                     /codon_start=1
                     /product="Phage lysin (EC 3.2.1.17) # Phage lysozyme or 
                     muramidase (EC 3.2.1.17)"
                     /EC_number="3.2.1.17"
                     /label=Phage lysin
                     /note="Phage lysin"
                     /db_xref="SEED:fig|6666666.356851.peg.32"
                     /translation="MKAAIKRCSIALIVAIGVTLAPGTLRTSPEAQQKTASWEDCRASP
                     YYCPAGVLTVGIGSTGNVQNRPYSNDEIARRWVNDMQRAENCVNGNFNGAAMPQSAFEA
                     MTDTAFNLGCSGLMWFTNRQGSKQRTTIWKHAQAHEWPAMCERLTDFVNSGGQRSTGLV
                     NRRTDFKVWCLRDIAGAP"
     CDS             22164..22601
                     /codon_start=1
                     /product="hypothetical protein"
                     /label=hypothetical protein
                     /note="hypothetical protein"
                     /db_xref="SEED:fig|6666666.356851.peg.33"
                     /translation="MKLTATLAALLVLAVSGVLWQTYQRGIDRAHTEALTDSARQQHEL
                     LTEVRALADDARNVLAQVREREQQRYAEGEERREKMREVMRPDRCANTVVPAAVSDSLQ
                     KRASVNRHADTERSGAARPDGADTDAHAKNAGDLGRGRALE"
     CDS             22570..22704
                     /codon_start=1
                     /product="hypothetical protein"
                     /label=hypothetical protein
                     /note="hypothetical protein"
                     /db_xref="SEED:fig|6666666.356851.peg.34"
                     /translation="MTWGAVALWSDQLRDALDTCNADKAAINDLYLRRLQRLKDAATP"
     CDS             22715..23173
                     /codon_start=1
                     /product="Phage tail protein # FIG072132 and FIG003673"
                     /label=Phage tail protein # FIG072132 and FIG003673
                     /note="Phage tail protein # FIG072132 and FIG003673"
                     /db_xref="SEED:fig|6666666.356851.peg.35"
                     /translation="MLKTDSLRDALTASSTWCRANPEAFTVFVEEGGIETTGETPSFLY
                     RYSLVLFVMNFTGDIDDFTLPLMAWLWQNQPDLLLNPQKNREVKFTTLINNDDSADILF
                     EIPVRERVRVTRDDNGTLRAEHLPEPRPRLTGGVWDAVLDDATGETTT"
     CDS             23170..23808
                     /codon_start=1
                     /product="Phage tail completion protein"
                     /label=Phage tail completion protein
                     /note="Phage tail completion protein"
                     /db_xref="SEED:fig|6666666.356851.peg.36"
                     /translation="MTDNLFHALDTVFDDILYGLSPAGRLKTARQVGQALRRSQQQRIR
                     AQKNPDGSAYATRRRKVLRSQQGMIFVWEGQVRHLKNWHGGRGKYGRTLTGFDEDRNAI
                     RTFYRSDIERYIEINTQAVRRTTSKKAPMFQRLRGYRFLKMRADTDGASVGFDGIAARI
                     ARVHQYGERDKVGPGAFARYPVRELLGISPTDERLIQDTVINGLGSAAT"
     CDS             23805..24386
                     /codon_start=1
                     /product="Phage baseplate assembly protein V"
                     /label=Phage baseplate assembly protein V
                     /note="Phage baseplate assembly protein V"
                     /db_xref="SEED:fig|6666666.356851.peg.37"
                     /translation="MSAELMRLLENLLRVGVVTAVDPESWRVRVKSGELLTDWLRWNTT
                     RAGAFNVWFPPAVGEQVLLGCLGGNPETAVIIGSLFSEAHPAPGNSLKEIVITAPDGAR
                     FRYDAAAGALEATGMKTVNVVASVSVTLNTPVVECTQHLKARTVEITHGGTLAGNVAHS
                     GGAMTSNGVQVDNHRHGGIQPGGSWTSGTQ"
     CDS             24383..24751
                     /codon_start=1
                     /product="Phage baseplate assembly protein"
                     /label=Phage baseplate assembly protein
                     /note="Phage baseplate assembly protein"
                     /db_xref="SEED:fig|6666666.356851.peg.38"
                     /translation="MTATYTGMNPHGTGTLTDADQLWQSVRDILTTPLASRVMRRDYGS
                     LIPDLLDAPQNAVTRLQLMSAAVIALTRWEPRISLNAVDIRYSASGTVEAELSGLITET
                     MQAASSTLTLRSDSDGDG"
     CDS             24738..25634
                     /codon_start=1
                     /product="Phage baseplate assembly protein J"
                     /label=Phage baseplate assembly protein J
                     /note="Phage baseplate assembly protein J"
                     /db_xref="SEED:fig|6666666.356851.peg.39"
                     /translation="MATVDLSQLPQPQIIEVLDFEVLLQEVKAVMIAAFPTAQQASVTA
                     ALALESEPLTVIAQVIAYREMMLRQRINEGAEACLLSYAVSSDLDNLAANLNTQRLTIT
                     KATDTADAVMESDSALRLRAQAAFEGLSVAGPTGAYEYFAKSASGKVADAKAISPSPAV
                     VVVSVLSTEGDGSASADLLATIDAALSADDKRPVGDRLTVQSAEIVRYTITAVLYRYPG
                     PESEPIQQAAQQALTSWLNTQGRIGRDVARSAIMAALHVQGVQRVELLEPAQDIVIGDT
                     QAAYCTGFTVTEGGSDE"
     CDS             25627..26235
                     /codon_start=1
                     /product="Tail protein I"
                     /label=Tail protein I
                     /note="Tail protein I"
                     /db_xref="SEED:fig|6666666.356851.peg.40"
                     /translation="MSNSLLPPSASDFMRHVASSTQLLSEIAVNLDTLWDAERCPAQLM
                     PYLAWALSVDRWDKRWSEQTKRQVIKAAWLVHRQKGTIAALRRVVEPFGYLIRITEWWQ
                     TGGVPGTFRLDIGVQDAGITEETYLELERLIADAKPVSRHLLGLNIVMDCAGNIPLAAG
                     QYSGDALTVYPYFPETITTAGADVRGVVVHLSDNVSVSA"
     CDS             26232..27626
                     /codon_start=1
                     /product="Tail fiber protein"
                     /label=Tail fiber protein
                     /note="Tail fiber protein"
                     /db_xref="SEED:fig|6666666.356851.peg.41"
                     /translation="MTTRYFALLTTTGAALLANATALGRQLQITQMGLGDGGGTLPTPD
                     PTQTKLVNERRRAPLNSLSIDPANTNQIIAEQVIPEDEGGWWIREIGLYDANGNLIAVA
                     NCPETYKPQLQEGSGRVQTVRMILIVSSTDAVTLKIDPAVVLATRAYTDSKSTEAKTYT
                     DAQTSSAKIEVKAYADNLLDQLATTMTATLTEKMDKTQNGADITDVAKFLENIGLTAPR
                     FSGVVGTTRNAKMSIATASATATFTADEIIVAESLGGRQYRLSLFNASVNLTMTGAGGM
                     DTGTAPAAGFVALYAIYNPTSKAQALLAVNTTSAVSPEIYAGGNMPAGYSASALVSVWR
                     VSSSRFVVGYQSGRHINIMRSAALSSTTQHADLIPLSLAGLVPPNAHSVNGDGYTTTSD
                     GSTVAVNFSIASSATGINRYSATQFGSLSMPFSSVAIIDAQTVYYTATIVSGALTMAIN
                     VSGYEI"
     CDS             27623..27778
                     /codon_start=1
                     /product="hypothetical protein"
                     /label=hypothetical protein
                     /note="hypothetical protein"
                     /db_xref="SEED:fig|6666666.356851.peg.42"
                     /translation="MIYVQFSDSSQTDVVAVFSCPQNEAAYQHQGQVPDNDARYLTFIS
                     KLEQVE"
     CDS             complement(27804..28313)
                     /codon_start=1
                     /product="Phage-related tail protein"
                     /label=Phage-related tail protein
                     /note="Phage-related tail protein"
                     /db_xref="SEED:fig|6666666.356851.peg.43"
                     /translation="MMMVYGLFVFELRTLPYQQLQQSRAWRHVKNERINRSAKWQYIGA
                     GEDQITLSGVLYPEITGGEVSLTALTTQAYSGRPWPLIDGTGQIYGMYVLTGMQTTRTE
                     LNRYGKAKKIEFSLSFQRCDEDLREKLQSSSFSDLMDTARSAATNAMNNVKDAATGAID
                     TVKGLF"
     CDS             complement(28326..29366)
                     /codon_start=1
                     /product="Phage protein"
                     /label=Phage protein
                     /note="Phage protein"
                     /db_xref="SEED:fig|6666666.356851.peg.44"
                     /translation="MLWSLITGAVSVLGGVLSLLLSPIGLIGAAFVAAGLLIWRFWEPI
                     RTFFSGMFTGIVISLGPIRQAFTGLAPVFDVIVSAVSRLWDRFTQLFQPIQTTKKTLDD
                     CAIAGYGFGKVLGSALELLFWPLQKLMEGIGWVLEKLGLIPSGLDAAQKKADQLKELTP
                     EGKDRLQGLVANLTGDLKGATTAPPPAPKPPLTGDSGTQRRLQKIADNTGGVLEETKKR
                     IGPGDIVFKNLPKALAVRGEWQESRLTGGTPSAPSQPAQTMQALSDRPAVVAATQPVKQ
                     ADASPVGRPAARTPAASGFNGEIHIHLHGVERQDARELGRIVADAVSAELTRRDRLQRG
                     SFRDRE"
     CDS             complement(29420..31297)
                     /codon_start=1
                     /product="Phage protein"
                     /label=Phage protein
                     /note="Phage protein"
                     /db_xref="SEED:fig|6666666.356851.peg.45"
                     /translation="MKSLDIRVAFSAIDRLTRPVNAARQSAGGLSESLKRTQAAIKDLD
                     NQSRTFNRLRDSVQKTSRKIDEASRSLDGLKKAQQNNTVLTDKQREHMAALAAKLERLN
                     ITRDQEMVKLRAVSQALRGHGVSLVGSNATIQSAIRRTEQYNQTLERERRQLAAVTQAR
                     ARYERMQQTAGKLRGSGTMAVAGGAAVGYAGGQFLAPAVGFDEEMSRVQALTRLDKGDQ
                     QLAALRAQAKKLGAETAFTTRDAASGQAFLAMAGFTPQAIQAALPGVLNMALAGGMELG
                     ETADIGSNILSQFNLDASQMDRVSDVLTGAFTRTNTDLFSLGETMKYTGPVAAKLGISL
                     EDAAAMAGMLANNGIRGSDAGTAMRASLARLASPPKAAAEALKELGVSVADAKGKMRPM
                     QDVLRDLYKATKKYGQVDQVSFFKDIAGEEAFVGLQTLVQAAGSGALGKLSGELKKAKG
                     EADAVAKKMADNLGGDLKNLDSAWEGFRIQVEETTDRPLRSLTQGLSDVITTVSNWVRE
                     NPRLTQTLLLAVGGAAAFAVAVGGTSLAIGLLMGPLAKLQLGFSLLLGSRGVGGAVSMF
                     SGLSSLLGGPMARMGGWLQLFSGSTGRLTATLTHCVACYWPCLPRRCLH"
     CDS             complement(31284..31442)
                     /codon_start=1
                     /product="hypothetical protein"
                     /label=hypothetical protein
                     /note="hypothetical protein"
                     /db_xref="SEED:fig|6666666.356851.peg.46"
                     /translation="MQFDQIDDLVADIAVVFNWPPSELFSMDLGDVIAWRARAAIRSGA
                     SEADEKP"
     CDS             complement(31448..31765)
                     /codon_start=1
                     /product="probable tail protein"
                     /label=probable tail protein
                     /note="probable tail protein"
                     /db_xref="SEED:fig|6666666.356851.peg.47"
                     /translation="MNTPNDNTVTLATPIARGDSTISQVAITDDIKQAGSLRGLRLVNV
                     LNMDVDSITTLLTRVTSPKLKLAEINAMDTRDFMRLAEAITPFLVHAEPGEPNAEATEE
                     A"
     CDS             complement(31813..32328)
                     /codon_start=1
                     /product="Major tail tube protein"
                     /label=Major tail tube protein
                     /note="Major tail tube protein"
                     /db_xref="SEED:fig|6666666.356851.peg.48"
                     /translation="MAVPHKLRLFTCFVNGNNQIGKVTSVTLPKLTRKTEDFQGAGMIG
                     SVAVDLGMDSGALEAQMVVGGMEKKLLLEYGGDIDDVRLRFAGEYYTDGDSQLVEVEMR
                     GRITEIDGGESKQGEDTSVTYALKNTYYKLSIDDQSVLEIDLLNFIYKKNGKNIYPDRI
                     TSALGLGN"
     CDS             complement(32329..33573)
                     /codon_start=1
                     /product="Major tail sheath protein"
                     /label=Major tail sheath protein
                     /note="Major tail sheath protein"
                     /db_xref="SEED:fig|6666666.356851.peg.49"
                     /translation="MRECAADIRDYRHELNNVMVANMSETRFHGVRVRENTDLVTAIND
                     IDSSVIGVVAVAEDADADTFPLNTPVLITRVNSVLGKAGKTGSLYKTLKAIADQTSPKV
                     IVVRVAAAVEGGDKTQSQLIIGGTAADGSYTGMYALLTAEAKVNYRPRILAVPDYDTAE
                     VTSALCVIAQNLRAFVYAGCHGCATMAEAITYRAQFAYRELMVIWPDFIAYNPLSGSNE
                     TFPAPAYACGLRAAIDNAQGWHKSLSNVAVNNVLGISRDVFWSLQAEDSDANELNNKEI
                     TTLIKRNGFRFWGNRTTDTHDYLFEVYTRTAQILADSIAEAQFEAVDEPLTPANVKDVV
                     NGINGKLSALVTAGRLIGGECWFDIQDNPTTGLRQGQVRVRYKYTPVPPLEDLTLYQTF
                     TDDYFDSAFSSLGGV"
     CDS             33662..34801
                     /codon_start=1
                     /product="Gene D protein"
                     /label=Gene D protein
                     /note="Gene D protein"
                     /db_xref="SEED:fig|6666666.356851.peg.50"
                     /translation="MAITELTDSLINAAKRYDDALTEAVKSPAFSITLGGKSLKELSDR
                     LISLSLTDNRGFEADQLTLSIDDSDGRVELPPRGAQIALSIGWQGEALTYKGLYTVDEI
                     SHEGPPDVLGVTARSADFREEFNVKREVSWHDVTIERVVSAIAHRYGMKAQISDMLMNI
                     EIDHADQTEESDMSFLTRMAEQLGAIATIKNGTLLFILPGGGVTASGKALPSASLTRSS
                     GDGHRFRIADRDAYTGVRAYWLDLKFGKKKKVSVKRRRTKPKPKKEKSSSREGDYITGA
                     EGNVFVLRKTYQNEEVAKRAAAAKWRQLQRGAAEFSITLARGRAELYPEMHLTVSGFKP
                     DIDNQDWIIARAEHVIDGNGFTTRLELEAKIPDWIAESE"
     CDS             34865..35086
                     /codon_start=1
                     /product="hypothetical protein"
                     /label=hypothetical protein
                     /note="hypothetical protein"
                     /db_xref="SEED:fig|6666666.356851.peg.51"
                     /translation="MARTRTSRRLSDITIRQYHQCQNLECSETFTTLNTVERRVSKRTR
                     EDPLPPDFIPQDAFPASHYGRDQLNLAL"
     CDS             complement(35138..35272)
                     /codon_start=1
                     /product="hypothetical protein"
                     /label=hypothetical protein
                     /note="hypothetical protein"
                     /db_xref="SEED:fig|6666666.356851.peg.52"
                     /translation="MTATRRFFCACNLASGSKMAAEWQRPFFRYKKGGLQSVAIVNCC"
ORIGIN
        1 atgaatgaaa ctgataaaag catcgtctct ctatttatca tcggcacgct gattgccgcc
       61 ggcaaagtgc tggcaggcag tgagcccatc acactgcggc tgtttattgg tcgcgtgatg
      121 ctgggaggtt ttgtctcaat gatggcaggc atcgcgctgg tacagttccc tgacctgtcg
      181 cccgttgcta tcaacggcat tggtgccgca ctgggcatcg ccggctacca gactatcgaa
      241 ctgcttatcc agcgccgtgt tcgccagctg ggcaaaaaaa acacaccgga gaaaaataac
      301 gatgctcaat aatcctaacc ttattgcgtt tttggacatg ctggcttttt ccgaagggac
      361 cgcaacacat ccgctcaccc gtaatcgcgg ctacgacgtc attgttaccg ggattgatgg
      421 caaaccagag attttcaccg attaccagga tcatccattc gccaatggcc gtccggggaa
      481 aatcttcaat aagcaggggc agcgctccac cgctgccggg cgctatcaac agctctaccg
      541 ctactggcca gcctacaaaa cacagttggc gttgccggat ttcgaacctg attcgcagga
      601 tacgctggcg atccagctga ttcgggagca gcgcgcgttg gacgatatca tgcaaggccg
      661 gcttaccagc gccattaccc gatgcaacaa catttgggct tcgctgccgg gggctggcta
      721 tggccagcgc gagcataacg ccgagcggct gatcgccgtg taccagcaag cgggcgggaa
      781 actggcatga aaaacgccat gatcatcgcg gccatcatga tggcgcttag cgcaggggtc
      841 ggcgtgcagt tctggcggct gcaaaacgcc cgccagttaa ccgaacagca agcgcagacg
      901 ctgtcgttgc aacagatcgc gctggatgaa aaatccggcc agttaaaagc actgtccgag
      961 caggccgaac gcaacaatct tgagcaggcg cggctgcgcg acatggctgc cgagacgcag
     1021 gcagcgctct ctgaacggca aaaagtggtg atgaggttac aacatgaaaa cgacgcgctt
     1081 aaacgctggg ctgacactga cctgcctgct gatattatcc ggctgcgtca gcgccccgcc
     1141 ttcgccggtg gtcgtgctta ccgtgaatgg ctgccccaga ctgacgccct gccggttccc
     1201 ggcggccagt ccgcaaacca acggtgagct aaatagtctg ctggatgaaa ctgaagctgc
     1261 gctggcgact tgcgccgacc aggtggatgc cattattgcc tgccaggcaa aaagcgatgc
     1321 aacgcccggc gccactgtcg catcagggaa acaaacgggc aaacaggatt cgacagggat
     1381 tggtacgccg gcgccgcaat gaactcgccg ctgaggcaag gtaaaccact gaaaaaaacg
     1441 ttgggaagcg atgtttcaga ctgggatgtc agggcgactg agccaggaaa ccgaggtatt
     1501 cccattcaag tcggtcgctc atgctttcac cccaaatccg ctcgtgtttt ctctgacgca
     1561 gtctggtcgt tatcggagaa ctcgctacat attcctcttt acgggaacac gggtaaaaaa
     1621 acggggctgg aggtagcgcc ctgttcacat ttcgatccgg tggttacgct attgcaatgg
     1681 gtctgccgcg gcggcaataa aaaaccgccc gaaggcggcc atgacgcgtc gagataatta
     1741 atcgttctct aacgcacgct gaatgatatc ggcggtttga gtgattctag ttctgatcgc
     1801 atccagagca acttgcacac cactttcgct ggcaccctct ttgatgattt cgaggatagc
     1861 tgaaacgact atctctcttt tctcttcatc acttcttgca acatcatgtt gatcataaaa
     1921 ataattctta agcataagga ctccgtttca ttatcaatgg gcgcagcata tcgctaagat
     1981 tattccgaat aaagcattat cacaggtaat caatgagtgc ttgttgttat tttcggcgtt
     2041 tacatgccct tccctgctca atcaccgaac tcaacgtatg ggaaaaccgt tttgactatt
     2101 aagcaccgga gcaaaggcgg cgtgaccagg cataccaccc aaaacactgg cgattatgcg
     2161 ccgaatggca agtagtgcat cagagttttg atttcacgtt ctgaaagcaa aggggtttct
     2221 gattgggagg gacattagca aaggaacagg cgatatctgg acacatgaca atcagctaaa
     2281 cggcacgata cgaccgcaaa ataccgattg tgctggcggt cggcgatcag aataaaccat
     2341 taaagtcagt gcatatctaa cgatgaagaa gaattatttt aggaaaaata ttaggaaata
     2401 aaaatgacag gcataaaaaa accgcctcat ggcggtcatg ttcttttatt tattttatta
     2461 tttatcaagg cgttagcaca tggtgcccag agcgggactt gaacccgcac agcgcgaacg
     2521 ccgagggatt ttaaaaagtt aatgcccgct ttttatatca tagagttact ttaattcaat
     2581 acgttagcag tattcaattc aggttaatgc gagctaatgc ggaaatctgc tgccatcggt
     2641 ttaacgtggc agcgccccat gattattcat ctgtggttaa agaatcaaac gggttgaggg
     2701 tcacggccgc atccagatga tccggcgcga aatgcgcata gcgcatggtc atcgtgatag
     2761 agctatggcc cagtatctgc tgcaacacca gaatattgcc gccgcgcatc atgaagtggc
     2821 tggcaaagct gtgtctgaga acgtgggtca actgcccttc tggtaattca atgtgcgctt
     2881 tctttaaggc gtgcttaaat gcctcatacg ctggtttgaa gagttggccg cgccgcttgg
     2941 gcaacaaggc gtgcattctt tcagaaatag gaatggttcg gtttttcttc cctttggttt
     3001 tgacgaatgt gatcctgccg ggaaggattt gcgattgttt cagggtctgg gcctcacccc
     3061 acctcgcccc cgtcgccaga cacaaacgaa cgatgatacc gagatcttta ttctctgatt
     3121 catcgcaggc agcaagcagg cgcttaattt catctgggta cagaaaagcc agttcctgat
     3181 cgccttcctt aaactgtcgt atgccgtcca gcgggttttc tttttcccac tctcccatgc
     3241 gcttcagctc agagaacacc gcccgcaggt aggaatattc acggttgacc gtggcctctt
     3301 taatggccgt cttccctttt gggttccatt caccttttaa ccggcgttcg cggtaaacag
     3361 cgaacatatt tttatcaacg tctatcgcaa agggattacc caaccgaaca cagattgcca
     3421 tcagtttaga gtaacggtct tcacctgact ccagcgtctg gccgtgcatg tcgtaccagc
     3481 gctggatcag gtcttgtagc gttgtgctgt tggtttcggt cgatatccct tttttctccg
     3541 ccatcaggcg gcgctcgtat gaaagcgcct cacctctggt ggcaaactgc ttacgaacgc
     3601 gctgaccatc acgcccatag gggaagcatt ggcaaagcca tttgccagat ggaagtttgc
     3661 ttacagccat gtaatattat ccagtaaagc tctgccattg ttcttcactg attattttca
     3721 gtggaatgcc acgattatcc cggtagtcta ttgctttttc gattttccga ccgtgagcct
     3781 gatatctcca atgtttacaa ctcaatgtac caataataag aaaatcaagc tttgccgtta
     3841 tattatcaat cacatttccg cctgcatcct caatcagttt tttacatact gatctttttc
     3901 cataaaggaa ttcacctgtc aggcaaactg ttgtattggc aagaactaag ctatctatat
     3961 catccacggg taagcgagtt gccagcccat caactacacc agaatcaaca tcacttccgg
     4021 taaaggcgat tagcgctttt ttcaattcat cacgttcttc tgatgtaatg atcccatcgg
     4081 cgagaattcg attaaccaat gcgtataact ctttgccagg ataattagct ttgagagcgg
     4141 cattagatga taaccaccaa tttaaatatc ttatttctga atcattaagc tcatgattcg
     4201 ccatcattcc cttacatagc ccctccaata aatgcttatc cgcttcatcg gagtacaaat
     4261 caagctcagg taaatcagac agttcttttt gtaccttgat taaatcagct ttcaaatacc
     4321 ttaattcatg ctgctcaata atgccatcag ccaagatatc ggacagccta tttgaaatca
     4381 tccgcacgca atagttttta ctaattaact cggcattttt tatccatgta tcaagaaaca
     4441 agacttcttt ctcatctata tgaccatcac tgtttatgcc ttcaatgata ttgataaggt
     4501 taataagtaa tttatctttg tttcttttat agttaaaaac atctagtttt tcatctgcca
     4561 tgaggttttc ctttggtatt aattataatt tcaaagtcaa cttataacta ctttccaacc
     4621 gggaaatcac ttactaaaaa caataatgac aaatatttct aattatcacc gaataaattc
     4681 acacgcactg gtttttttcc ttcatcctta ttccagtagt agcctgactg aagtaatgaa
     4741 ataagttcat cctgagttat tcttaccgta tcaaacaagt caaatttact tctatcaata
     4801 ctaggcttga atatatccag tgttatttta cccggatcat aactctgact gtctatcatg
     4861 attggcagat tggttagttt tttaggcgtt agttgattat atggaataaa gtcccctgaa
     4921 aagaaaccat caattcgtgc aactggatca taaccagaaa aacactcata ttttacttgc
     4981 agcataacag catcaggtgt ttttaaaaat tcgctccatt cgatatagcc cagcttgtca
     5041 ctataaaaaa catcaccacg accaaaagaa aaagagctac cttgcgtcca atcttcatat
     5101 tgatacttat taaaaacaaa tttagttaac tttatatcta gtgcattacg gtgagattct
     5161 tttattgcaa agcgccaacc agcggcataa ccatcaacaa aacgagcaat aagcgcggaa
     5221 ctcctgcgtg gctctctgat agttcgaaat gttgaagtta cctcattgtg caaaatctct
     5281 attttttcat gtatatcctt ttcgtcagat tcataaacct ctgtcggttc tattggaatc
     5341 tcacctgtat caacaaatga aaagaattga tctttggaaa ggatgaaaca gtttttttca
     5401 tttgcctgtt ttattttctt ccatccagca ttagggccac aacacaggaa atataatttg
     5461 gctgtaatac cttttctgac taacagtcct tttttttcag cgagtgattc tagttcatcc
     5521 tttatgtctt tatcaaaacc agtaaaacaa atctccaaac cacggggagt atctttcact
     5581 cgccgacttt caatcttgag atctgctata gctaaaggac tagcggcaga aaccatttct
     5641 tcatttgaag agtatacatc cattattctt tcaagtttga aggttctaaa gcccttcttg
     5701 ttgatgcaat acccttgaag ataattatct ttatatactg catcgacaac gtaattgtta
     5761 gacacctcat tattagcatt gatataagta aagaatattt ctttctcggt ttttgaaatc
     5821 cattcttcaa atgtcataaa aagcccttct ataaatagct atttgattta tctatcttta
     5881 gagttgagat attttttatg ttacttatcg atacgtctaa cgaaaaaaaa tagcgccaag
     5941 aattattcca gcaacaaaca cagcactgaa aaccaatggt tctgctttaa gcacctcttg
     6001 ccagctctgg cgagtattag gcgtggtttg accgggaacg ctcgaacact ggcgatcatc
     6061 caaccatgaa agcgcctgct ggagctgcga tcgggtcagc tcggttaacc gtccagtacc
     6121 gaaatgaata tggcagtaat gaattaattg ctgccgctga tctacctgct gggtattctt
     6181 caacaacaga tgcaccagtg cattactggc atccttttcc cggtatctgt cgcgcaatgc
     6241 ctgaagataa ctgaccgccg tttgatactg gttgaccgtc atatcctcaa tgcttttgac
     6301 gccaatttca gcatggacgc gctgccacac tgaaaaacct tcttcatagc cgccgtcagc
     6361 aatttctttt accagttggt ttaactgctt acgctgcgcg ggaaccagtg ggcgtttttc
     6421 ttcattggcc gccggaatgg caatattgat cttatcgacc gtgatgctgc tttcgtaaaa
     6481 atcccgcccg gctacccggt tttcatttcc atgagattca acactcattc ctggagcgtt
     6541 cccttatttt ttgttttcgt gataatccct gccagcaaca cgctgaccac tacccgttac
     6601 gtttatcgag cctgttgata ctgagcttcc tgccgttaat gcggccagta cagcagcttt
     6661 tactgtaaga ggcgcagtcc gatagttacc aagcaactgt tgttcttcat cagttagcgt
     6721 ggcagcagaa cgaacacctg taacaacgta ctgcacatca acaccgattt ttgatacagc
     6781 attcagatat gccgcatctg gcatcctgtc gcctttttca taattcaact gggttagttt
     6841 ttttactccc ccaatatctc ccatcgctac ttggctaagg ccgaggcgtt cacgctcctc
     6901 tcgcaagcga gtgccgatat aattttccat accaaatctc ttgactggta tattttttta
     6961 taccaaaatg attttcacag gctaacagtg gatcacaaca taccattatg acacaagaaa
     7021 atcatgatca gcggtcgcgt ctgccgcggg ggattgcatc gcgcaaccct acccccatga
     7081 ggctttccga agatgaacgc gccaggctgg cagcgttggc tgaaaaagaa agccgttcac
     7141 tctccagcat ggcgagactg gtttttctcc gggggctgga gtcttttaac gctgaaggat
     7201 aagcgccatg agtaaagcgt taaccatcaa tatcaccgtc ccaacggcat atgtttctct
     7261 caggaaatac tcagaattaa ccggtatccc ctttgaaacc tgtcggggca tggtaaaaag
     7321 cggaaaaatc attatccggc caaaagaaaa agcaaacgag aaagtagagg tgaatctcgt
     7381 ggccatgctg cgcgatgcca ttaccagcag tgaaatataa aggggtgaca tggagaataa
     7441 aaagtcaggc caccaatacg caatcacaca attaagtaag catacaaacg tatatcgggg
     7501 tttctcaatt attaaatgcc cgcgaacgat atcaaacccg attacccgat atcgtgttag
     7561 tcaggcggga cagtcttacg gtttatttga tgcactggca ttagccaccg gttatatcga
     7621 taaccttcac acagcgaggc gataatatga tttctatagt tcgtctatta atttctcagt
     7681 caccatcacc aacaatccct aatcagggta aaggctggct ggaactgcca aacggccaac
     7741 gcgttaagcc gtccgttaat caggtctatt ttgcaccctg gagccaaaag ccctacatgc
     7801 cagtgcctaa gcaaaagcgc cgctggtttt cgcgccttat gggtattgca cgtagcaggt
     7861 ggtaatgatg aaaataaatc acaacccgga aatatggcta caggccgccg atgatgctgc
     7921 ggagagtttt ttatctcagc ctactgatgt gcgagagagc ggcagcgaca atagttacac
     7981 caggattaac gttttgtcgt cgctcgaagc attggcggat gctgtttatt acctcaatca
     8041 caacctgtgc atttttatca agaaccgtgc gaatcaatgg tatcgagacg gaatgatgca
     8101 tgcaccggaa tttgccatta attgggcaaa gaaaggctaa tatcatggct aacaccgagt
     8161 ccgctcgcgc aattccgctg agcatcgcgg aaagaacaga ggggctaaac cacatagcaa
     8221 tgctgcgagg gaaatacttc aaaacaaaca gtgaaaaaga gatgtgccgc tttattgacg
     8281 atatgcggga caagattgat gacgattact ataaaaatat gcgtgtgctg tcagcaatat
     8341 ttgaattggc ggatattgat aaggaacggc atcacctgaa atttaatgaa ctgaccactg
     8401 acgagaaaga aaggctgatt aaagcaatga ataagctccg cgcagttgtg agtttattcc
     8461 ccaaaaactt aattcttcca ctgtaataaa aacccaattt ttaggcgtaa acccgccggg
     8521 ctttctatta cctgaaaaaa ggaaactgca atgaaagatg tcgaagtaaa aaccatgacc
     8581 gtcgccaatg atggcgcatt ggtcgagctg ctgaaaaagg cccgattgga ggaacgcaaa
     8641 gaccagcatt tttccttctc actgcgcctt gctgcgctgg ctgtccgcgc tcaacaacgc
     8701 gacctctccg ccgcagaagt ggtggaactt atacgccagg aatcagaacg ttttgagcac
     8761 tctgctcagg ggttgagctg atggactcaa tggacatggc tcaggaacgc gaagcgttca
     8821 tccgtgaaac acaaatccag catgcccggc aacagtcggg cttcaccgtt tctgcattcg
     8881 tctgtgaaag ctgtgacgcc cctatcccgg aagcccgccg cgtggccgtt ccgggtgtgc
     8941 gtctgtgcgt gtactgccag ggcgatgcag aactgaaaaa caaacactat cggggtgcct
     9001 tatgagcatt attgccacac cgctgaaatg ggtcggcagc aaggcccgtg tgatggatat
     9061 cttgagtgag catttgccgg ccggcaatcg tctgattgag ccgttcgccg gatcgtgcgc
     9121 ggtcatgatg aataccaact acccggaata cctgatcgcc gatataaacc ccgacctgat
     9181 taacctgtat caggtcatca aagaggatgc gaaggatttt attgataccg ccgaaggcct
     9241 gtttcgcaca gcgaatacag cagaaagtta ttaccgcttc aggcaggtat ttaaccgcag
     9301 caaagagaat cgcattacat ctgcggcact atttctttac ctgaaccggc acggataccg
     9361 aggcgtttgc cggtataacc gcgctggtgg atttaacgtc ccctacgggc attacgcatc
     9421 accttatttc ccactggcag agattcaggc acttgccgaa aaatcacgcc gcgcaaaatt
     9481 tatctgcgcc gcgtttggcg aaacactgca actgacccgc cccggcgatg tggtgtactg
     9541 cgatccgccg tatatcccgc aaacgccaac ggccaacttc accagctatc acactgatgg
     9601 tttcacccat aacgatcagt atgacctgtg cagcgcgtta tccagcctgg ccgaacgcgg
     9661 gatcactgtc atcgcgtcca acagcgacac ccaccacgca cacagccttt accaccggtt
     9721 tgatatctgc cgtttcaccg cgccgcgtag cgtcggcgtt gctgccgggg aaggcaagca
     9781 ggccggggaa atcatcgcca agcgtctgcc ggtgtctgct gcccgcagca tgtcgaaagt
     9841 ttgcgacggg tgcgaacatg aaggcggtgg gcattgcccc gattgtgggc cggcgatggg
     9901 tgatgccacc tatcaggaaa tggtggcatc cggcgcgttg aacgaggagc cgttctgatg
     9961 cagccgttag cctactacaa cgaaatagat aagtttgcag cgcagtggct gcgcaatctg
    10021 atcgatgccg gccatatcgc gcccggcatc gttgatacca gatcaattga ggatgtcact
    10081 cctaatgacc ttaaaggatt cagccagtac cactttttcg ccgggatcgg tgtctggtct
    10141 tacgcactgc gtagagcagg atggccggac agccgccctg cctggacagg ttcatgccct
    10201 tgccaacctt tcagcgcggc aggcaaaaaa ggcggggttg ctgacgagcg gcacttatgg
    10261 ccgtcgttct tccacctcat ccagcagtgc cgacctgatg ttgtctttgg agaacaggtt
    10321 gcgagtagtg acggccgggc gtggttcgac actgtacaaa ctgacatgga aaacgtgggt
    10381 tacgcctgcg cagcgctcga tctctgcgct gcgggcgtcg gcgcgccgaa catcagacaa
    10441 cggctttttt gggtggccga cgaccagcgc tcaggactca gatcatcatc ctcggaatgc
    10501 gttaactcgg ttcaattcga tcaaaaagcg acagctgatg ctggcacatg ttgcggggtt
    10561 gacgggatgg acaacgccgt gcgcatcgga cgcgagacgg ggcgggatcg gtatcacacc
    10621 gggtatgact ggcagcagct tggcacaact ggtgaaagtt gccgggtggc ccacgccaat
    10681 ggcaacaaac aacgacaggg cggcgaaacc ggtgaatgca atgaatgtac gccgctcgga
    10741 cggcagcaag atccaacagc ggcttcagga ctttgcgggg atatgcggcc ccttgaggtt
    10801 aacggttttt ggcgtgatgc agactggatc tgctgccggg atggaaagtg gcggccagtt
    10861 gaatccggct cattcccgct ggctaatggg gttaccggtc gcgtgggacg cttgcgcgcc
    10921 tacgggaacg cgataaacgc agaagtcgcc actgcctttg tttcggcata tatggggcgc
    10981 gctgataatg cctgaacagt gggcctatcc ttggaacgct ccacgcccgg cgatctccgc
    11041 accatcgggc gtggctgatc tccgcccctc tctactcgtt accgatgctg aaccgcatcc
    11101 ggccgtcaca cggcatctga gccggatggt taaacgcgct ttggcagcgc caggtgatga
    11161 ccggaatctt aatcaagccg tagcacagtt ggatcaccgg gagccgaacg gcacccagtt
    11221 gcgtatccgt cgcggtctgg cggaaatagt acgccgggat tatcagaaaa cgctaagtga
    11281 ctggatgaaa acgccggaag gcgtggaagc ccgcttgcac gaacaaccgt tttttatccg
    11341 tgacgtttac cgccaaaaaa ttgaatggct gcgtgcgaac cgcgagccgc gacacatcag
    11401 cgcctttttc atgggaaccg tgaaaaaagc cctgctgcgt ctggatgctg tacgcgcaca
    11461 gcaaggtgtg cgcgatggct ttacatcgga actggcggcc tattgggggc cgcgttgggc
    11521 gtatctggcc gggtttacca agcatgaggt gatcaatgcc gcgcataccc ttgcggccgc
    11581 catcgccgaa atgtttgaaa ccgagtgcgg ccacacatcg ccggaagaca tgaccgacga
    11641 tgaaattcag tggctatatc gccatctggg gcgcgaactg ctggcattac gtgtgacacc
    11701 gccgtgctgg gggttggtta tcggtgatca acaagcccgg caccgcatct attccgccat
    11761 tttacgcatt acttcacctg aatggtgggg acggaaactg tggcgactgc gttgtgaatg
    11821 gcgggaaaat cagtttcgcg ccatcggcgt gatccacaaa aaacgcatgc cgtatgtcag
    11881 tcttgatgcc ctcaacctgt ggcaagaaca gcgccgcaag aatcgcgctt ttttccagac
    11941 acatgaactg gttgatgaag atggcaacat cgcatcactg gaaaacatgg tgtacggcag
    12001 tatcagtaat ccggctatcc gccgtcatga gctgatgacc cgcatggccg gtgttgaaat
    12061 ggtggcaatc gcgcggggtg atgaaggtgt tttcctcacc atcacctgcc cgtcgcgtta
    12121 ccacgctaac atccagaacg gtcaccgaaa ccctaagtgg gatcatacct ctccacgtca
    12181 ggggcagcgg tatttatgct gcacctgggc gcgtgccatg tctgcgttga atcgtcgcgg
    12241 cttgcgccct tatggttttc gcgttgccga gccgcaccac gatgcaacac cgcactggca
    12301 tgtgttgctg tttatgccac ctgccgacag aaaggccatc accgatatct tgcgtgaata
    12361 ttttattgct gaagaccgtg cggagctggg gcgcaacacc ggcgcacgat tcaaggctaa
    12421 aaagctcgat ccaagaaaag gcagcgcgac ggcttacgtg gcgaagtaca tcagtaaaaa
    12481 tatcgacggt tacgcgcttg atggtgagct ggataacgaa accggcaaac cattacgcga
    12541 aacggcaaag tttgcgatgg cgtgggcatc acaacataac atccgacagt ttcagccgtt
    12601 cggtctgccg ccggtcacgg tatggcgtga actgcgccgt ctggcaaacc aacttaccgc
    12661 agcccagaaa gaaaacggca cgtttaaacg cggggccgca cagcttgctg acccggcaat
    12721 ggatgctgtg ctggcatcgg ctgacgccgg ttgttttgcc acgtacatcg aaaagcaagg
    12781 cggcgtgtta atcccacgcg agcgctacac cgtgcgcatt gcctatgaag acgctgacga
    12841 acaaaacacc tacggcgaga cgccggaaaa aatcttcggt gtgttctctc cacgtctggg
    12901 ggctatctcc cgtatctgca cccggttaat caagtggaaa atccgcaaaa aacaggccat
    12961 tgacgatggt gccagcatta gcaccgggag tggtttagct gttacgtcgc cgaccggcga
    13021 cgcttggagt tctgtcaata actctacggg cgatgaaaaa acagccattc cgtcaggtat
    13081 agacggggat gactatggtc gttgtgaact gccagatgga gagcctggcg atacatccgc
    13141 tcaaaccttc gccgacttcg agcgcatgac agacccggaa cgccgggcac tgctgtccag
    13201 gttgcgaact caaccgccgg atcggcggaa taaccaacac tcgtccacta ctcaacggaa
    13261 caaacctgtt gaaaaacagg ttgttgtcaa tattccggac gagtggcgcg ccagtattgc
    13321 cgatttcgcc ctatcaatcg gctgggatgt cagcatagga gaggcaagca ggctagcagc
    13381 gggtcatccg attgattttt gtggacatcg ttattacgcc agaagaaacg gggaactgta
    13441 tcgtgaagca gagaagcagc aggttgataa ggctggtttg atgcagcgag tagcggcgct
    13501 gcgtgagttg agccagagaa aagattagat aataagttag tgttgttttt cttgtctaaa
    13561 tgtcttatta ttatcttatc cctagcggat atgctcttta aaaactgagg aaacagatgg
    13621 taagggtgat ctggtcaaag aaagcactga aacaacgtct gactatcgac aaacggtatc
    13681 agaccgccat aagtgaaaag gtgactgagc tggaaaattt ccctgctgtc aggctggata
    13741 ttgtcccatt gaaggggaaa gaaggtgcgt tcaggctgag ggttggcgac tatcggatca
    13801 ttttccaaat taccaaaggc gaaccggtga tctgcgaaat caaagaggtt aaacgcagaa
    13861 cgtcaacaac ctactaatca ggcggggaaa cccgcccgtt tcctcaatga cataacgaag
    13921 gccgcgactc atagataccc ggataaaaat atgtcaaaac tacaatatat caacgatgta
    13981 aacggcaatc cgcaattcgt tgtgttgccg atagatgtgt acgaaagcct gctctccaat
    14041 gatgatagcg ggtatgaatc cattccctat gccgccgacg agcatgatga tgaaaccgtg
    14101 ccaaatgagg tggtcaacat tatgtttcgt gacgatatca gcctgttggc cgcatggcgt
    14161 gtttaccgtg gactatctca gtacgatgtc gcggaacggc tggggacgac gcaatcagcg
    14221 gtgtctcagt gggaggcgaa agattctcga ccacagaaga aaacccgcca aaaactggct
    14281 gaactgtatg gatgtcgtcc tgaacagatg attttgtaaa tttataacct tctctgaaac
    14341 ctgcttcggc aggttttttt tgccccaaat gcgccgcaca aacccgcaca attttgcaca
    14401 acttttttga tgctattttt cccctttccg cccggtacgc gcgcgcgccg ggccggtttc
    14461 tgcacttgca caaaaaatga agcgggagca gcgcgcaggt gacgggggaa cagcccccgc
    14521 gatggggggt aggtagggat cccccttgat gtgccgaatc tgcccctttc tcgccctgct
    14581 gcgtgcgtat tttcatgcgg gagacgcggc gcggcatctg gtgagagcac ctgacagcgt
    14641 agcgctgagg cggttttata cgggtgggga atggtggcgt tagccgttga tctgaaaaga
    14701 gatagtgcac ggttgacgtg aaagtttttg aataaaaacc gccgcgtgag tgcggcggcg
    14761 gcggtggaat atcactcggc tttcaacagg gcgtaagggt tgaagcggat cacctccatc
    14821 cccagccagt cattcacatg cttaagcgct tccatgactg gcatcagttc gttgatggcg
    14881 aacacccgcg cggctttctc cacatcgcca aaggaaccgt tgccctccgg catggcgccc
    14941 atcagttgcg gcggcacgcg gtgtgcggcg aggatgtcat cacgcgtcac cgatttgata
    15001 ttcagaaatt catctttggc ggatatctgg ctgaagggaa taatctgcac ccctttatca
    15061 ccgccgcccg gtgcatgtaa cagcaggttt ttaaatgcgc ctttgccgcg cgcttccttt
    15121 agcgttttct tcacgccctc catgctttcg ttatccacct gggatgcacc gatgtagata
    15181 atgcacccgg cgtgtgaacc gttgtcatag tagagcttgc ggaacatatc ggcggagtgc
    15241 gacaggctgg ccgacagcaa cgcgcccata tactccggca tgccgtagat ctcctggtgg
    15301 atatccgggt tgatgacgtg gcacacgctg ccggtatcaa acgcgtgctc gtctttccac
    15361 tgccggataa accagtaggt atccagatcg ctaccacgcc gggtgtactt ggccggaacg
    15421 tggcgcaggg atagcacgcc gcccagccgg ttgacccggc gctcaagata accgttgccg
    15481 aacacaaacc agtcgagcac aaaggcggag aacgcctgac gcgacaataa cggatgcggg
    15541 ataaaacacc cggtcagtgc gttgcgcttg aagtacagcg ccgactggtg ccatgacgca
    15601 ctgccaaatg cgcgggccag cccgtacaag tccaccgggg tgtcgtagta acggccgttg
    15661 tcggcgcaat acatattatc cagcaggtcg taaccgtccc tgaccggata agggccgtca
    15721 aaggtgaagg cgctcagccc cgaatcgctt ttcagggcgt cagccatatc cggctgaccg
    15781 gtggtaaccg ccagatgtgt gccggttttc ttttttctgc tcatcagaac tccatcgcaa
    15841 agccaccgcc gccctgctcc tggccgagcg gttcattgat gacggccagc atggtcgccc
    15901 aggccagatc gccatgatta gagccgcgtg cgcggtcggt gtcgtaggtc atgatgccgc
    15961 ctggcgtctt ggcgcgccgc acggcgttga acgcgttgat cagcgcctgc tcgctgcggt
    16021 catattccca gcggccggca cggatcacct gaagcatttt cagcactaag gcgcgtttgg
    16081 atgacaccga catcaggaag cacaccgccg ccgggaagaa tttcttcaca atctggtaga
    16141 ccgcttcgcc gatgccggtg ccatcaatgg cgatatgctg cacgttgtat ttgaaggtta
    16201 gcgcctcgat cactttcgcc tgttcttcga actccaggcc acgtatctgc tgggtttcga
    16261 tggtgcggaa cttgccgccg gccaccagcg gcggtaccac caccgagatc gccccgctgt
    16321 cgccgttgcc gctgctgccg ttggcgtcat acccaatcca gacgccgcga tcggctatcg
    16381 ggcgcgacgc gaagggcttc cagtccggcc actcgtcgta accgtcggcg ccgcagctaa
    16441 ataacaggtt gagattaaag gccgattcac cgtcgcggac gaactcacag ccgtacaggt
    16501 tgttgtattc atccgggctg ttttcgtcgc ggatttcctc caggtcggtg tattcccagc
    16561 cgtgatcgat aacgtcctgt agcgtcacaa tctgacgcca ggttttatcc gggcataaca
    16621 ggccgctatt gagcgctttc catgacacat caaacgcgac cttttgcgcc ttgctgcgct
    16681 tctcattcca gcgtgcgccc gtccagaacg ggtacgcttc atgggtttcg ctcgacggag
    16741 tggaaaagta ggtgcgcgtc agccccttca gcgttgccat cgccccggct accttgcgca
    16801 ggttggcaaa gttactgacc cagaaaaatt catcaaaata caggttgccg gtgtaggact
    16861 gcgccgtcgc ggccgacgtc cccagaaaat gcagctcggc cccgttgctc aggactatct
    16921 tgtcaccgcc ctttagctcg acgtccacct cctccgccac cttctggata aagccccgga
    16981 actggtgcgc ctgacggcgc gaggcagaca gaaaaatctg gtggcgctgg taagggtaag
    17041 ccacgtcatc acgcaacgcc cgcaataacg cttcacgggc aaagtaccag gtggcgccaa
    17101 tctgacggga cttcaggagc atccggttgc gttgatcctg ctgggcatac cagccgtttt
    17161 gatgccaggc cagcgagtcg agaatgttgg ttcgcaacgc ggcaatctgt tcttcggtga
    17221 aatggttttt caccttgcgc ttacggggtt tcttgccgcc tgcggcattg cccagctggc
    17281 cgtcgttcag cgttttcaac tgccgggtca gcgcatccat ttccttcagg tcgccgccgg
    17341 ttttggtcgg cttctgggcc aactggcaca gccgcgcatc gatagaatgc gtcacgcgct
    17401 ggataggcgg cgtctcgtcc cattcgtccc gctttttcca ggcatacacc gtgttttgat
    17461 taatccccat caggcgcgaa atttccgctg gcgggtagcc ctgccagtaa agctgttttg
    17521 ctcgctgccg tacaaatgcg tcctgaatca tgcgcggttt ccccctttgc cgggaagatt
    17581 accccgcgcg cgatccgcct ttcgctcact ttcggctctg gccctccgcc gacaacaaaa
    17641 ccgcgttgag acagggagtt aggctctgca atcatggcgt cacagacacc acaggacagg
    17701 actacaggca tgagcggtac agccaaaccg acccgcaaaa aattccgggt tgccgtctcc
    17761 ggttccaccg ttgacgggcg cgaaatcgga cgcgaccaaa tctatgcaat ggcggaaagc
    17821 tacaacccgc aggtatacgg cgcccgcgtt aacgtagagc acattctttc gccctatccg
    17881 ggcagtgatt ttggcgcgat gggcgatgtg gaagcgctga gtgcggaaga cattaccgac
    17941 ggcccgctaa aaggccgtgc cgcgttgtat gcggaaatcg aacccaccga gcggatgaaa
    18001 cagctcaccg gggaagggaa aaagatttat tccagtatcg aaatcgatcc gcagtttgcc
    18061 gcgaccggta ggccgtatct gcgcggtctg gcgatgacgg ataccccggc cagcctgggc
    18121 accgagcgtc tgaagttcgc cgcgcagcaa cgggcgcagg tacaggcatt caataacctg
    18181 cccggtgagc cggtcatgtt taccgaagcg atggaagcgg agctggtcga actgtccgaa
    18241 cagcgcaacg acgaggggaa gcagtggttt tcccgcgtga tggggattat cggcaaaggc
    18301 cgcaagtcag aaggtgaaca gttttcccag gtacgtgaag cggtggagaa cgtcgcccag
    18361 tcccatgctg acctgctgga caatttcaac gcgctaaaaa accaacagca gcagaacagc
    18421 cgcaccatcc agacgctgac cagcgagctg gccgcgctca cgcaaaagct ggcgacgcag
    18481 gataacagct acaaccagcg tccggcggcc agcggtggta acagcggcgc gcaactggct
    18541 gacttttaag taccgttaag cgagacaagc gaacatggaa aactctaccc gtaatcttta
    18601 taaccagtac atttcccgtc aggcgcagct taacggagtg cagccgaatg acgtggcgat
    18661 gaccttcagc gtcgaaccgg ctgcccagca gcgcatggag caagcggcgc aggaaagcga
    18721 tgaattcctg aaacaaatta acgtgtttgg ggttaaagcc caggaaggcc agaagatcct
    18781 gatcggcagc aagggaccga tcgccagtac caacaacagc agcgacggca cgtcccgccg
    18841 taacccgacc gacaaccatt ccaaagagcc gaacacctac cactgccgca aggtgaatta
    18901 tgactcggcg atcagttacc cgcagttgga tgcctgggca tcgcagccga actttcaggc
    18961 gctgatcagt caggcgaatg cacagcaaat cggcctcgac cgcatcatga tcggtttcaa
    19021 cggcatcacc tatgccgaga agtccaaccg cagcgccaat ccgttgttgc aggattgcgg
    19081 cgtcggctgg ttgcaaaaaa ctcgcaacga tgcagcgcac cgcattatca aaaacgtcac
    19141 gctgaccgcc cgcgacgaag acaacaagat tattgccaaa ggcacctacg gcaacctcga
    19201 caccgctgtg tttgatgcca aaaacagcct gctggatccg tggcaccgca aggcgccgga
    19261 tttggtggtg atcatggcgt ccgacctgct gacgtccagc aatttcccgc gcctcaatgc
    19321 gctgagccag agcaacccca ataccgagtt gctggccggt cagttgattg tcagtcagga
    19381 gcgtgtgggc ggcctgccga cttttctggc gccttacttc ccgtccaatg cggtgctgat
    19441 cacctcgttc aaaaacctgt cggtttacta ccaactgggg gcgctgcgcc gcagcatcgc
    19501 tgaagagccg gagtacaacc ggatctccac ctaccagtcg tccaacgatg actttgtggt
    19561 ggaggactac ggcaaggtgg ccttgatcga cggcattcag tttgcgcagg ccgcaggcga
    19621 cggccagtaa cagcctggcg gggtaatact ccgccccaac cggagaacac accatgctga
    19681 caccggcaca acgacatttt cagcgggtca tggccgagcg tcggggccag gcggacaccg
    19741 aaacggaggt atcacgcacg gcccatgagc aaatccttca ccgcctgcgc ctgcatcagg
    19801 ccgcgctgaa acaggtgcaa tctgatgcga ccaaagcgga gatgaaaaaa gccatgctgc
    19861 cggaatacga cggctggatt gatggcacgc tggaaggcga cagcggccga caggacgaag
    19921 tgatcgtcac cctgatggtg tgggcgatcg actgccagga taacgcactg gcgctgaagc
    19981 tggggcgcta tgttgttaag catggcctgt ctttgcctgc cgacaagttc cgccgcgatg
    20041 cggtaacggt actggctgag gaagtgagca acccggtgct gacgctggca accaccgatg
    20101 cagatgccga cctgagcggt tataccgccg tgctggatga agtggccgcg attgtggatg
    20161 gcaaagacat gccggatgaa gtgcgcgcca agttgtgcaa agcccgcgcc ttctcacgcc
    20221 gtgcggcggt ggatgcgcca accaaaggcg aggcgctgaa actgttccgg gaagcgatgg
    20281 cccgcaatcc gaacgcgggg gtgaaacggg atatcgccac gctgacgcgg gagctgaaaa
    20341 agctcatgcc ggccagcagt aacgaaccgg aagaaggcgc gcccggcgac gatgaagcag
    20401 ccactgagcc gcctgccgga gagacgacgc cggcgacccc gaccgatgcc gcacagccag
    20461 cggcaaagca agctgccgtg cgtaacacca cggcgcggaa aaccacacgg acgacgggca
    20521 aaagcaaagc cgcccgtcag tctgccaaac gttaacgact tcggccccgt ccgacaggcg
    20581 gcgcgccggg tgatctgccc gtatacggtc tttttgcccg gcgcccaccg cctgactttt
    20641 gggagagttg agcatgagcc tggtggcttc gaaacgtgtt agcgacagcg gcgacgtgcc
    20701 ggagattgac gacggcgcgg ccgcggtcag cgccggggag ttctggccgg tgatcgtcct
    20761 gcgcgatctg cgcctggccg cccgcatcac cggcggtatc accaccaccc gcctgatgca
    20821 cgtcaccact gaagcggtgg tgcatgtaac tgaccagttg gcgggctggc agcaggcgca
    20881 acaggccgcc ggatatgccg cactggcgga cgtcccggcc ggacaggtca acggtgaaag
    20941 catcaaggtg taccgcttca agcgtgcggt ttatgccatc gcccgcgcct tgctgctgga
    21001 gggataccgc gatgtggata ccacggccaa aggcgacaag gcgacggaca cttttgacag
    21061 ccagcgtgac gatttgtggc gtgatgcgcg ctggagcatc gccgatatac gcggcgcaca
    21121 gcgccttttt gcggagttgt gctgatggta gttcgggcgc ttcagggcga tacggtggac
    21181 ctgctttgtt atcgccacta cggcacatcc gccggtgtca ccgagcaggt gatcgccgcc
    21241 aatccggggt tgagccgcca gatgtttctg acggccgggc aggctatcac gctgcctgat
    21301 attccccgtc agacagaaca ggaaacggtg cagttatggg attaaacgat cttcagcgcc
    21361 tcaatgatgg ggtgacctat ggcctgtccg tgatggtgac cggcatcggg gtgatgaccg
    21421 tcagtgaaaa agttgcgctg gcgggcctgg ttatcggtgt tgtcaccgcg tggcgcgcct
    21481 ggttgttccg gcgtcgtatc gagcgtgcac agcgacgccg caatgaactg attgaacaga
    21541 ttttacagca gtccgagcgc cgcccgctga atgcgtcgga acgccgcgcg gtggctattt
    21601 tgcatcaggg tgacgttgac gatgaaagcc gcgattaaac gttgttcgat tgcgctgatc
    21661 gtggcgatcg gtgtcacgtt ggcgcccgga acactgcgca cgtcgccgga agcacagcag
    21721 aaaacggcca gttgggaaga ctgccgggcg tcgccgtatt actgccccgc cggcgtgctg
    21781 acggttggca ttggctctac cggtaacgtg caaaaccggc cgtacagcaa tgacgagatc
    21841 gcccgccgct gggttaacga catgcagcgg gcagagaact gcgtcaacgg caattttaac
    21901 ggcgctgcca tgccgcaatc ggcgtttgaa gccatgaccg acacagcgtt taacctcggt
    21961 tgcagcggcc tgatgtggtt taccaaccgg cagggcagca agcagcgcac caccatctgg
    22021 aaacatgcgc aggcgcacga atggcccgcg atgtgtgagc ggctaaccga ttttgtcaac
    22081 agcggcggcc agcgctccac cgggctggtt aaccgtcgca ccgactttaa agtctggtgc
    22141 ctgcgcgata ttgcgggggc gccatgaagc tgaccgccac cctggccgcg ctgctggtgc
    22201 tggccgtcag tggcgtgctc tggcagacct accagcgcgg catcgaccgg gcgcataccg
    22261 aggcactgac cgacagcgcc cggcaacagc acgagctgtt aacggaagtc cgggcactgg
    22321 ccgacgatgc cagaaacgtg ctggcgcagg tgcgcgagcg tgagcaacag cgttatgccg
    22381 aaggggaaga acgccgtgaa aagatgcgtg aggttatgcg gcccgatagg tgcgctaaca
    22441 ctgtggtgcc tgctgctgtc agcgacagcc tgcaaaaacg cgcctccgtc aaccgccatg
    22501 cagatactga gcgatccggc gccgcccggc ctgacggcgc cgacaccgac gcccacgcta
    22561 aaaacgccgg tgacctgggg cgcggtcgcg ctctggagtg atcaacttcg ggatgcgctg
    22621 gacacctgca acgcagacaa ggccgccatc aacgatttat acctgcgtcg ccttcagcgc
    22681 ctgaaggacg ccgccacgcc ataggggaat gcacatgctg aaaactgact cgctgcgcga
    22741 cgcgctgacg gcatccagta cctggtgccg ggccaatccg gaagccttca cggtgtttgt
    22801 ggaagagggc ggcattgaaa ccaccgggga aacgccgtcg tttctgtacc gctactcgct
    22861 ggtgttattc gtgatgaact tcaccggcga tatcgacgat ttcaccttac cgctgatggc
    22921 ctggctgtgg cagaaccagc ccgacctgct gctgaacccg caaaagaacc gcgaggtgaa
    22981 attcaccacg cttatcaaca acgacgacag cgccgacatc ctgtttgaaa tcccggtgcg
    23041 cgagcgggtc agggtcacgc gggacgataa cggcacccta cgcgctgagc atctgccgga
    23101 acctcgtccg cgtctcaccg gcggggtatg ggatgcggtg cttgacgatg cgaccgggga
    23161 gacaacgaca tgacggacaa cctgtttcac gcgctggata cggtgtttga tgacatcctt
    23221 tacggcctgt caccggccgg gcgactgaaa acggcgcgcc aggttgggca ggcgctgcgc
    23281 cgcagccagc agcagcgcat ccgggcgcag aagaacccgg acggctcggc ctatgcgacc
    23341 cgccgccgca aggtgctgcg ctcgcagcag ggaatgattt ttgtctggga aggtcaggtg
    23401 cgccacctga aaaactggca cggcggccgg ggaaaatacg gccgcacgct caccggcttt
    23461 gatgaagacc gcaacgccat tcgcacgttt taccgcagcg atattgagcg ttatatcgag
    23521 atcaacacgc aggccgtgcg acgcacgacc agcaagaaag ccccgatgtt tcaacgcctg
    23581 cgcggctacc gctttctcaa aatgcgggcc gataccgacg gggccagcgt cggctttgac
    23641 ggcatcgccg cccgtatcgc ccgcgtgcat cagtacggcg agcgtgacaa ggttgggccg
    23701 ggtgcctttg cccgctaccc ggtgcgcgaa ctgctgggga tttccccaac tgatgaacgc
    23761 ctgatccagg acacggtgat caacggtctg gggagtgccg caacatgagc gccgaactga
    23821 tgcgattact ggaaaacctg ttgcgtgtcg gcgttgtcac ggcggttgac ccggaaagct
    23881 ggcgggtgcg cgttaagagc ggtgaattgc tcaccgactg gctacgctgg aacaccacgc
    23941 gcgccggggc gtttaacgtc tggttcccgc ctgccgtcgg agaacaggtg ttgctgggtt
    24001 gccttggcgg taatccggaa accgccgtga ttatcggcag tctgttcagt gaagcccacc
    24061 cggcacccgg caacagcctg aaggaaatcg tgatcaccgc gccggacggc gcccgctttc
    24121 ggtatgacgc cgccgccggt gcgctggaag caaccggcat gaaaaccgtc aacgtagtgg
    24181 cctcggtcag cgtcacactg aatacgccgg tggtggaatg cacccagcac ctgaaggccc
    24241 gcacggttga aatcacccac ggcggcaccc tggccggtaa cgtggcgcat tctggcggcg
    24301 ctatgacctc taacggcgtt caggtggata accaccgcca cggcggcatt cagcccggcg
    24361 gtagctggac gagtggcaca caatgaccgc gacctatacc ggcatgaatc cacatggcac
    24421 cggcaccttg accgatgccg atcagctctg gcagtcggtg cgcgacattc tgactacgcc
    24481 gctggcatcc agggtgatgc gccgggatta cggcagcctg atccccgacc tgctggatgc
    24541 gccgcagaac gccgttacgc ggcttcagtt gatgagtgcg gccgttatcg ccctgacgcg
    24601 ctgggagccg cgtatctcgc tgaatgccgt cgatattcgt tattcagcat cgggaacggt
    24661 ggaagcggag ctatcggggt tgattaccga aacgatgcag gcggccagct ctacccttac
    24721 gctcaggagt gacagtgatg gcgacggttg atttatcgca gttaccccag ccgcagatca
    24781 ttgaagtgct ggacttcgaa gtcctccttc aggaggtgaa ggcggtgatg attgccgcct
    24841 ttccgaccgc tcagcaggcg tctgtgaccg ctgcgctggc gctggaatcc gagccgctca
    24901 ccgtgatcgc gcaggtgatc gcctaccggg aaatgatgtt acgccagcgg attaacgaag
    24961 gcgcggaagc ctgcttgctc agctacgccg tatcatccga tctggataat ctggccgcca
    25021 acctgaacac ccagcgactg accattacca aagcgaccga caccgccgac gccgtgatgg
    25081 aaagcgacag cgcgctacgc ttgcgggcgc aggcggcttt tgaggggctg agcgtggccg
    25141 ggccgaccgg cgcgtatgag tattttgcca aaagtgccag cggcaaggtg gcggatgcca
    25201 aagcgatcag cccgtcgccg gcggtagtgg tggtgtcggt gttatccacc gagggcgacg
    25261 gcagcgcctc ggctgatctg ctggcgacca ttgatgccgc cctgtccgcc gacgataaac
    25321 gcccggttgg cgaccgcctg acggtgcaaa gcgccgagat tgtgcgctat accattacag
    25381 cggtgttgta ccgctatccg gggccggagt cggagccgat ccagcaggcg gcacagcagg
    25441 cgttaacgtc atggctcaac acgcagggac gcatcgggcg ggatgtggct cgctcggcca
    25501 tcatggcggc gctacatgtg caaggggtgc aacgtgttga actgctggag ccggcgcagg
    25561 atatcgtgat cggcgacacg caggcggcgt attgcaccgg atttactgtc accgagggcg
    25621 gcagcgatga gtaacagcct gttgcccccg tcagccagcg actttatgcg ccacgtcgcc
    25681 agttccaccc agctcctgag tgagatagcg gtcaatctgg atacgttatg ggacgctgag
    25741 cgctgccccg cccaattgat gccgtacctc gcctgggcgc tgtcggttga ccgctgggac
    25801 aaacgctggt cagaacagac caagcgtcag gtaatcaagg ctgcctggct ggtacaccgc
    25861 cagaagggca ccatcgcggc attgcgccgg gtggtggagc cgttcggtta cctcatccgc
    25921 attaccgagt ggtggcagac cggcggcgta cccggcacat tccggctgga tatcggcgtg
    25981 caggatgcgg gcatcaccga agaaacctat ctggagcttg agcgcttaat tgcggatgcc
    26041 aaaccggtga gccgtcacct gctggggcta aatatcgtca tggactgtgc gggtaatatc
    26101 ccgctggccg ccgggcagta cagcggcgat gcactgaccg tttaccccta tttccccgaa
    26161 accattacca ccgccggcgc tgacgtgcgc ggtgtagtgg tgcatctatc tgacaatgtg
    26221 agcgtatccg catgacgaca agatattttg ctttgctgac aaccaccggc gcggcgctgc
    26281 tggcaaacgc cacggcgctc gggcggcaac tgcaaattac ccaaatgggt ttgggcgatg
    26341 gcggcggcac gctgccaacc cctgacccaa cacaaaccaa actggtgaat gaacggcgcc
    26401 gggcgccgct caattccctg agcattgacc cggccaacac caaccagatt attgccgaac
    26461 aggtgatacc ggaggatgaa ggcggctggt ggattcgtga aatcggtctg tatgacgcca
    26521 acggcaatct gattgccgtc gccaactgcc cggaaaccta taagccgcag ttacaggaag
    26581 gctccggtcg ggtgcagacg gtacgcatga ttttgattgt cagcagtacc gacgcggtaa
    26641 cgctgaaaat cgacccggcg gtggtgctgg caacgcgggc atacaccgac agcaagagca
    26701 cagaggcaaa aacctacacc gatgctcaga cgagcagtgc caaaattgag gtgaaagctt
    26761 acgccgataa cctgctggat cagctcgcta cgacgatgac agcaacgctg accgaaaaaa
    26821 tggataaaac gcagaacggc gcggatatta ccgacgtggc gaaatttctg gaaaacatcg
    26881 gcctgacagc gccacggttt agcggtgtgg ttggcacaac ccgtaacgcc aaaatgagta
    26941 ttgcaacggc atccgcgacg gcgaccttta ccgcagatga aatcattgtg gccgagtcgc
    27001 tgggcggacg gcaatatcgc ctcagtttgt ttaacgccag cgtcaatctg acaatgaccg
    27061 gcgctggcgg tatggacaca ggaacggcac cggcggcggg ctttgtggcg ctttacgcca
    27121 tctacaaccc aaccagcaag gcacaggcac tgctggcagt gaataccacc agcgcagtat
    27181 cacctgaaat ttacgctggc ggcaacatgc cggccggcta tagcgcatca gcactggtca
    27241 gcgtctggcg agtatcatca tcacgatttg tggtgggcta tcagtcaggg cgccatatca
    27301 atattatgcg cagcgccgcg ctcagcagca caacgcagca tgctgacttg atccccctct
    27361 ctctggccgg gttggtgccg ccaaatgccc attcggtgaa tggcgacggc tacacgacaa
    27421 cgagcgatgg ctcgacggta gccgtgaatt tctcgatcgc atcatcggca acaggtatta
    27481 accggtattc ggcgacgcaa tttggttcac tgtcgatgcc tttttcatcc gtcgccatta
    27541 ttgacgccca aacggtttat tacaccgcaa ccatcgtttc cggggcgttg acgatggcca
    27601 taaacgtgag tgggtacgag atatgattta cgttcaattt tctgattcat cgcaaactga
    27661 cgttgttgct gtattcagtt gcccgcagaa tgaagcggct taccaacatc aggggcaggt
    27721 accagacaat gacgcacgct atctgacatt tatctctaag ctggagcagg tcgagtaaca
    27781 gataacacgg ccctgtcggg ccgttaaaac agtcctttca ccgtatcgat agcgcccgtc
    27841 gccgcatcct taacattatt catcgcgttg gttgccgcac tgcgcgcagt gtccatcagg
    27901 tcgctaaagg atgaagactg cagcttctcc cgcaggtctt catcacagcg ctgaaagctc
    27961 agcgaaaact caatcttctt tgcctttcca tagcgattca actctgtgcg cgtggtctgc
    28021 atgccggtca gcacgtacat gccgtaaatc tgcccggtgc cgtcaatcaa cggccagggg
    28081 cggccgctgt aggcttgtgt ggtcagcgcg gttaacgaca cctcgccacc ggtaatttcc
    28141 gggtacagca cgccgctcag cgtgatctga tcttccccgg cgccaatgta ttgccatttt
    28201 gcggaacggt taatccgctc attctttaca tgccgccagg cacgcgactg ctgaagctgt
    28261 tgataaggca aggtacgcag ctcaaacaca aacagcccat acaccatcat catcggtttt
    28321 tctccttact ctctgtctct gaaactgcca cgctgaagtc tgtcgcggcg ggtcagttcg
    28381 gcactgaccg catcggccac aatacggccc agctctcggg cgtcctgccg ttcaacgcca
    28441 tgcaggtgta tatggatttc cccattgaaa ccactcgccg ccggtgttct ggccgccgga
    28501 cgaccgaccg gggacgcgtc ggcttgtttg acgggctgtg ttgccgcgac cacggcgggg
    28561 cggtcactga gcgcctgcat ggtctgcgca ggctgtgagg gggcagaagg tgtgccgcca
    28621 gtaagccggg attcctgcca ttcgccacgc acagccagcg ctttcggcag gtttttgaaa
    28681 acgatatcgc cggggccgat gcgctttttg gtttcttcca gcacgccgcc ggtgttgtcg
    28741 gcaatcttct gtaaacggcg ttgggtaccg ctgtccccgg tcaggggtgg cttaggcgcg
    28801 ggtggcggtg ccgtggtggc tcctttcagg tcgccggtca ggttagcaac cagaccttgc
    28861 agccggtctt tcccttccgg cgtcagctct ttcaactgat cggctttttt ctgcgccgca
    28921 tccagtccgg acgggattaa accgagcttt tccagaaccc agccgatccc ctccatcagc
    28981 ttttgcagcg gccagaacag caattccagc gccgacccta gcaccttgcc gaacccatag
    29041 cccgcaattg cgcagtcatc cagtgtcttc tttgtggtct ggataggctg aaaaagctgc
    29101 gtaaatcgat cccacaggcg tgacacggcc gacacaatca catcaaagac gggagccagg
    29161 cccgtaaatg cctgccgaat ggggccgagg ctgataacaa tgccggtaaa catcccgctg
    29221 aaaaacgttc tgataggctc ccagaatcgc cagataagca gcccggccgc cacaaacgcc
    29281 gcgccaatca atccgatcgg gcttaacagc aatgacagca cgccacctaa caccgagacg
    29341 gcaccggtga tcaggctcca cagcacgggc aaaccgctca gccgcaacaa cagcccgcta
    29401 acgcccctga ccagtgaccc taatgcagac accggcgagg taaacacggc cagtaacatg
    29461 ccacgcagtg ggtcagtgtc gcggttagtc ggcctgtgct gccggagaaa agctgtagcc
    29521 agccgcccat gcgtgccatc ggcccaccga gcaggctact taacccggag aacatcgaca
    29581 ccgcgccacc gacaccccgc gaccccagca gtagcgaaaa gccgagctgg agcttagcca
    29641 gcggccccat cagcagaccg attgccagtg aggtaccacc gaccgccacc gcgaatgctg
    29701 ccgcaccgcc gacagccagt aacagcgttt gcgtcagcct gggattctcc ctcacccagt
    29761 tgctcacagt ggtgatcaca tcgcttaacc cctgcgtcag gctgcgcagt ggccggtctg
    29821 ttgtctcttc aacctgaata cgaaaccctt cccaggcact gtcgaggttt ttcaggtcac
    29881 cgcccaggtt atccgccatc tttttggcga cagcatccgc ttcacccttg gctttcttca
    29941 gctcaccaga cagcttaccc aatgcgccgc taccggccgc ttgtaccaac gtttgcagac
    30001 cgacaaaggc ctcttccccg gcaatatctt tgaagaaaga cacctgatcg acctggccgt
    30061 attttttagt cgccttgtac agatcacgta atacgtcttg cattggccgc atcttgcctt
    30121 tggcgtcagc taccgacacg cccagctctt ttaacgcctc cgctgccgct ttcggtggtg
    30181 aagccagacg ggccaggctg gcacgcatgg cggtaccggc atcactgccg cgaataccgt
    30241 tatttgccag catgccggcc atcgcggccg catcttccag gctgatcccc agcttggccg
    30301 ccaccgggcc ggtgtatttc atggtttcgc caaggctgaa gaggtcggtg ttagtgcggg
    30361 taaaggcacc agtcagcacg tcactgacgc gatccatctg gctggcatcc agattgaact
    30421 gtgaaagaat gtttgacccg atatcagcgg tttcgcccag ctccatgcca ccggccagag
    30481 ccatattcag cacgcccggc aatgccgctt gtatcgcctg cggcgtaaac ccagccattg
    30541 ccagaaacgc ctgcccgctg gctgcgtcgc gggtggtgaa tgcggtttcc gcgccgagct
    30601 ttttggcctg cgcccgcagt gcagccagtt gctgatcgcc tttatccagc cgggtcagcg
    30661 cctgaacgcg tgacatctct tcatcaaacc caaccgccgg ggccagaaac tgcccgcctg
    30721 catatccgac agctgcacca cccgccacag ccatcgtgcc gctgccacgc agtttgcctg
    30781 ccgtctgttg catgcgttca taacgggcgc gagcctgcgt aaccgcggcc agttgccgcc
    30841 gctctcgttc cagtgtctgg ttatattgtt cggtgcgccg gatggcgctc tggatagtgg
    30901 cgttactgcc gacaagcgat acaccgtgac cacgtagtgc ctgtgatacg gcgcgcagtt
    30961 tcaccatttc ctgatcgcgg gtgatgttca accgctccag tttggcggcc agtgcggcca
    31021 tgtgttcccg ttgcttatcg gtcagcacgg tattgttttg ctgggccttt ttcagcccgt
    31081 ccaggctgcg gctggcttca tcaatcttgc gtgaggtctt ttgtacgctg tcgcgcaggc
    31141 ggttgaaggt cctggactga ttatccagat ccttaatagc ggcctgggtg cgtttgaggg
    31201 attcagacaa accgcccgca ctctggcggg cggcgttgac cgggcgggtc agccggtcga
    31261 tagcactgaa tgctacgcgg atatcaaggc ttttcatcgg cttcactggc tccacttcgg
    31321 atagccgccc gcgcgcgcca ggctatcacg tcgcccagat ccatgctgaa cagttcagag
    31381 ggcggccagt taaaaacaac ggcaatatca gcgaccagat cgtctatctg gtcaaactgc
    31441 aagacggtta cgcttcctcc gtcgcctccg cgttcggctc gccaggctcc gcatgcacta
    31501 aaaaaggcgt gatggcctcc gccagtcgca tgaaatcgcg ggtatccatc gcgttgatct
    31561 cggccagctt caattttggc gaggtaacgc gcgttaacag ggtggtgatg gaatccacgt
    31621 ccatattcag gacgttgacc agccgcaggc cgcgcagcga gccagcctgt ttgatgtcgt
    31681 cggtgattgc cacctggctg atggtgctgt cgccacgcgc gatgggtgtc gccagggtaa
    31741 cggtgttgtc gttcggtgtg ttcatggtca caggctccgg gcggctggtg tggccgccat
    31801 tgttaagatt gttcagttac cgagtccgag cgcggacgtg atgcgatccg ggtagatgtt
    31861 tttgccgttt ttcttgtaga tgaaattcag caggtcaatt tccagcaccg attgatcgtc
    31921 aatcgacagc ttgtaatagg tgtttttcag cgcataggtg acggatgtgt cttcgccctg
    31981 cttggactcg ccgccgtcaa tctcggtaat acgcccgcgc atttccacct cgacaagctg
    32041 gctgtcgccg tcggtgtagt attcccccgc aaagcgcagg cgaacgtcat cgatatcgcc
    32101 gccgtattcc agcaacagct ttttctccat gccgccgacg accatctgcg cttccagcgc
    32161 gccggagtcc atgccgagat cgaccgccac cgagccaatc atgccggcgc cctgaaagtc
    32221 ttccgttttg cgggtcaact ttggcagcgt gacggaggtg accttgccta tctggttgtt
    32281 gccgttcaca aagcaggtga acaggcgcaa tttatgcggt acggccattt acacacctcc
    32341 cagcgacgag aacgcggaat caaaatagtc atcggtgaag gtctggtata acgtcaggtc
    32401 ttccagcggc ggtaccggcg tgtacttgta acgcacgcgc acctgtccct gtcgcaggcc
    32461 ggttgtgggg ttatcctgaa tatcgaacca gcattccccg ccgatcagcc tgcctgcggt
    32521 caccagcgcg ctcagcttgc cgttgatgcc gttcaccacg tctttcacgt tggccggggt
    32581 aagcggttcg tccacggctt caaactgcgc ttccgcgata ctgtcggcga ggatttgtgc
    32641 ggtacgggtg tacacctcaa acaggtaatc atgggtgtcg gtagtgcggt tgccccagaa
    32701 ccggaacccg ttacgcttaa tcagcgtggt gatctcttta ttgttgagtt cattggcgtc
    32761 gctgtcttcg gcctgaagcg accagaacac atcacgcgag atgcccagca cgttatttac
    32821 cgccacgttc gacagcgact tatgccagcc ctgagcgtta tcaatcgccg cacgaaggcc
    32881 gcaggcatac gccggcgccg ggaaggtttc attgctgccg gagagtgggt tataggcgat
    32941 gaaatccggc cagatcacca tcagctcacg ataagcaaat tgcgcacggt aggtgatggc
    33001 ttccgccatc gtggcgcagc cgtgacaacc ggcgtagaca aacgcccgca gattctgcgc
    33061 aatcacacac agcgctgacg tcacttcggc ggtgtcatag tccggtaccg ccagaatgcg
    33121 tggccggtaa ttgaccttcg cctctgccgt cagcaaggca tacatgccgg tataactgcc
    33181 gtctgcagcc gtcccgccga tgatcagttg ggactgggtt ttgtcgccgc cttcgactgc
    33241 tgccgctacc cgcactacga tcacttttgg gctggtctgg tcagcaatcg ctttcagcgt
    33301 cttgtagagc gagccggttt tacccgcctt gcccagcacg ctattcaccc gtgtgatcag
    33361 caccggcgta ttcaggggaa aggtgtctgc atccgcatcc tccgccacgg ccaccacgcc
    33421 aatcacactg gaatcaatgt cattgattgc ggttaccagg tcggtatttt cacgaacgcg
    33481 tacaccgtgg aaacgtgtct cggacatgtt cgccaccatt acgttattga gttcatggcg
    33541 ataatccctg atatccgccg cgcactcacg cactgacggg tctggccgtc cggtgacaac
    33601 aaaaagccat ttttccccac gcgtgcgcgt gaaatcatgc ggtgaaaaca aggggaagac
    33661 gatggctatc accgaactga ccgactcact tatcaatgcg gcgaaacgct acgatgacgc
    33721 gctgaccgag gcagtaaaaa gcccggcctt cagcattacg ctgggcggga aatcactgaa
    33781 ggaactgagc gaccggctga tctcgctgtc gctgaccgac aaccggggct ttgaggccga
    33841 ccagctcacg ctgtcgatag acgacagtga cggacgggtg gagctgccgc cacgcggcgc
    33901 ccagattgcg ctgtccatcg gctggcaggg tgaagcactg acctataaag ggctgtacac
    33961 cgtggacgag atttcccacg aaggcccgcc cgatgtgctg ggcgtgacgg ccagaagcgc
    34021 agatttccgc gaagagttca acgtgaaacg ggaagtctcc tggcatgacg tgacgataga
    34081 gcgcgtggtg tcggcaatcg cacaccgtta cgggatgaag gcgcaaatca gcgacatgct
    34141 gatgaatatc gaaatcgacc acgccgatca gaccgaagag agcgatatgt cattcctgac
    34201 ccggatggcc gaacaactgg gggccattgc caccatcaaa aacggtacgc tgctgtttat
    34261 cctgcccggc gggggtgtga ctgcatccgg taaggcgctg ccgtcggcca gcctcacccg
    34321 cagcagcggt gacggccacc gcttccgtat tgcggatcgg gatgcctaca ccggcgtgcg
    34381 cgcctactgg ctggatctga aattcggtaa aaagaaaaag gtcagcgtga agcgccgccg
    34441 gacaaagccc aaaccgaaaa aggagaagag cagcagccgt gaaggtgatt acatcacggg
    34501 cgcagaaggt aacgtgttcg tgctgcggaa aacctaccag aatgaagagg tcgccaaacg
    34561 ggccgccgcg gctaagtggc gacagttgca acgcggggcc gccgagtttt cgattaccct
    34621 ggcgcgtggc cgtgctgagc tgtatcccga aatgcacctg acggtaagcg gctttaagcc
    34681 ggatatcgac aatcaggact ggatcatcgc ccgggcggaa cacgttattg atggcaacgg
    34741 ctttaccacc cgtctggaac ttgaagcaaa aatccctgac tggatagcgg aaagtgaata
    34801 aaatggcagc gagttcaact cccacagggg agccattatg ttcagatgtc ctttttgcgg
    34861 agcaatggcc cgcacccgta ccagtcgccg cctgagcgat atcactatcc ggcagtatca
    34921 ccagtgtcag aaccttgaat gcagcgagac atttaccacc ctcaacacgg tagaacggcg
    34981 cgtatcaaag cgtacgcggg aagacccgct accgcctgac tttatcccgc aagacgcctt
    35041 tccggcctcg cattacggac gggatcaatt gaatctggcg ttgtaaaaca aaagccccgc
    35101 aggatgattg cggggctttt gtttgggtac cgattgttta acaacagtta acaatggcga
    35161 ctgattgaag tccgcctttt ttgtacctga aaaacgggcg ctgccactct gctgccattt
    35221 tgctgccact tgccaaatta caggcacaaa aaaaccgcct cgtggcggtc atgttctttt
    35281 atttattttc ttattca
//
