# Supplementary material for: May the Phage be With You? Prophage-Like Elements in the Genomes of Soft Rot Pectobacteriaceae: Pectobacterium spp. and Dickeya spp
Source: Front Microbiol. 2019 Feb 14;10:138. doi: 10.3389/fmicb.2019.00138 (PMC6385640; doi:10.3389/fmicb.2019.00138)
Supplement: Supplementary file 2 [file Data_Sheet_2.ZIP › Supplementary_prophagesGENBANK_files/Genbank FILES _SRP_prophages/phiDdi3.gb]

LOCUS       Exported               60824 bp ds-DNA     linear   UNK 02-AUG-2018
DEFINITION  phiDdi3.
ACCESSION   .
VERSION     .
KEYWORDS    .
SOURCE      phiDdi3
  ORGANISM  phiDdi3
REFERENCE   1  (bases 1 to 60824)
  AUTHORS   .
  TITLE     Direct Submission
  JOURNAL   Exported Aug 2, 2018 from SnapGene Viewer 4.2.3
            http://www.snapgene.com
FEATURES             Location/Qualifiers
     source          1..60824
                     /organism="prophage phiDdi3"
                     /mol_type="genomic DNA"
                     /note="/genome_id=6666666.356839"
                     /note="/genome_md5="
                     /note="/project=robertczajkowski_6666666"
                     /db_xref="taxon:6666666"
     CDS             1..864
                     /codon_start=1
                     /product="short-chain dehydrogenase/reductase SDR"
                     /label=short-chain dehydrogenase/reductase SDR
                     /db_xref="SEED:fig|6666666.356839.peg.1"
                     /translation="MDTTPAVLITGASSGIGAVYAERFAHRGHDLVLVARDSTRMDALA
                     VRLHQDYGVTVDVLPADLTQPDELAVVETRLREDSHIGILVNNADMSIAGNFLEQATND
                     IGRLVALNTVALVRLASAVAPRLAAAGEGAIINIGSVVGLAPEFGATVYGATKAFVLFL
                     SQGLSLELAPCGVYVQAVLPAATRTESGERSGTDINTLPPVMEAEELVDAALVGFDRRE
                     PVTIPPLHEFGQWEAYQHARQAMLPGFAQANTDARYRLMHSPILNCVRSAPVLFTQATD
                     SLMVNQ"
     CDS             1670..1783
                     /codon_start=1
                     /product="hypothetical protein"
                     /label=hypothetical protein
                     /db_xref="SEED:fig|6666666.356839.peg.2"
                     /translation="MWSNSAQRGTGRLGVKVQPSGSKVWSSLMYRKTSVST"
     CDS             1822..2193
                     /codon_start=1
                     /product="Integrase"
                     /label=Integrase
                     /db_xref="SEED:fig|6666666.356839.peg.3"
                     /translation="MKELTKESNSLYIFPLSTNGERPVRTDSLARSIMHFRAFNPEFKV
                     FTARDLRRTCKTLMGEAGISKEIRDRIQNHALNDVSSKHYDRYDYLTEKRRALEIWEDR
                     VNNYQRQQENNVVNLFGRR"
     CDS             2198..2812
                     /codon_start=1
                     /product="Cell filamentation protein fic"
                     /label=Cell filamentation protein fic
                     /db_xref="SEED:fig|6666666.356839.peg.4"
                     /translation="MAKYELNSAEERYQPGSGDLVLANKLGIIDEQEMEALESGLLLML
                     YEQLFIEGQPPEMLAFEHISRWHRQWLGNVYDWAGRLRNANLTKDGFQFAAADRIPLLL
                     DGFEKQFLARSGELKSLARSELVNYLAECHVEFILIHPFREGNGRLSRLLCDVLSVLSG
                     KGLLDYSLWDEHKAFYFKAIQAGVSGNYSPMMQLVSDILPD"
     CDS             complement(2809..2967)
                     /codon_start=1
                     /product="hypothetical protein"
                     /label=hypothetical protein
                     /db_xref="SEED:fig|6666666.356839.peg.5"
                     /translation="MTKKTAHTQITKTQIYRAVASSTAIETGVSVQKIEQQLKKNQAQA
                     KAVGLAR"
     CDS             complement(3126..3965)
                     /codon_start=1
                     /product="Mobile element protein"
                     /label=Mobile element protein
                     /db_xref="SEED:fig|6666666.356839.peg.6"
                     /translation="MPEKRELVRYVMKEHQASERRGCRIIGINRSLLHYCPNTARDLPV
                     VEALQKLAHQYPAYGFGLMFSKLRQAGLLWNAKRVYRIYRLLKLNLRRKGKECLPNRHP
                     QPLVIPHKMNHCWSVDFMSDALIDGRRFRLFNVVDDFNREALAIEVDLNIPAHRVVRIL
                     ERLSAERGYPAFIRSDNGPELTAAALAEWAERHGVILDFIQPGKPMQNGFIERFNKTLR
                     TEILDMYLFRTLSEVRELTEDWRTEYNEERPHSSLGDMPPVIYARKKLAGDPHCRWY"
     CDS             complement(3968..4234)
                     /codon_start=1
                     /product="Mobile element protein"
                     /label=Mobile element protein
                     /db_xref="SEED:fig|6666666.356839.peg.7"
                     /translation="MKKVRFTETQILRVLKEVEGGRHVKDVCRENGVSEASYYNWKAKY
                     GGMVSSDIKRMKELEEENRRLKQMYASLSLDHEILKDVVSKKL"
     CDS             complement(4539..5573)
                     /codon_start=1
                     /product="Phage integrase"
                     /label=Phage integrase
                     /db_xref="SEED:fig|6666666.356839.peg.8"
                     /translation="MAVRKNPDGGWICELYPNGAKGKRIRKKFATKGEALAFEQYTVQN
                     PWNEEKEDQRTLKELVDSWYSAHGITLRDGLKRQGAMHHAFECMGEPLARDFDAQMFSR
                     YREGRLRGEYARSNRVREVSPRTLNLELIYFRATFNELSRLGEWKGENPLKNMRPFRTE
                     EMEMAWLNQDQIALLLSECKRHDHPDLETVVRICLATGARWSEAEKLKGTQAAKCKITY
                     TKTKGRKNRTVPVSKEIFDLLPVDKKGRLFSDCYGAFRSAIKRTGIELPAGQLSHVLRH
                     TFGAHFMMNGGNILVLQRVLGHTDIKMTMKYAHFAPDHLEQAVKLNPLATSGDKVATEK
                     ANDG"
     CDS             complement(5573..6208)
                     /codon_start=1
                     /product="Repressor protein CI"
                     /label=Repressor protein CI
                     /db_xref="SEED:fig|6666666.356839.peg.9"
                     /translation="MKSYNHFWLQSTGYTKMKIDLSEQNNVEILDRICETYGFSQKVQL
                     ANHYNIAASSLSNRYRRGPISYDFAVYCALETGASIHWLITGEGPKFSGDPIIDPSKNT
                     ISIPHFTIVEGRLSEMEPLSVSPFIFRKKITAPMSLEYDGHTYFIDRTHPLSDGSWLVD
                     IEGAISIRDLTVLPAKRLHVAGGKVPFECGVDEIKTLGRVVGVYSEVN"
     CDS             6581..7084
                     /codon_start=1
                     /product="Transcriptional regulator"
                     /label=Transcriptional regulator
                     /db_xref="SEED:fig|6666666.356839.peg.10"
                     /translation="MFDYQVDKQPHFNDACRQFAQRHNLEAVAAAVGMRPQMLRNKLNP
                     DQPHRLTCDELWHITDVTEDPTLIDGLLAQMKCMPAVPVNEAKPERLTTYVLEAAAAVG
                     AVAARSVSTERLTQTGRHDFIGSVNSGIRFLSLVGLSIQARIQQNPTISATVDVISGIG
                     AGLS"
     CDS             7214..7648
                     /codon_start=1
                     /product="Tellurite resistance protein TerB"
                     /label=Tellurite resistance protein TerB
                     /db_xref="SEED:fig|6666666.356839.peg.11"
                     /translation="MGFFGFGKKVAAAKVELKKVENRDLMEAIIGGCLLVAAADGEIEK
                     EETDKLDQLLRSNPQLSHFGNEITQVIGRFTEQLQAGFRVGRLNILRELDDVKNTAKDA
                     EEVFVNMLTIAEADGEIEPAEQKVLEEVGRRLGLRIEDYL"
     CDS             7648..7812
                     /codon_start=1
                     /product="hypothetical protein"
                     /label=hypothetical protein
                     /db_xref="SEED:fig|6666666.356839.peg.12"
                     /translation="MDGLTNKLRLAAAMVLAFMAVAVDFSSYLLSVASDAFFIGAMVAV
                     IWAPLTKKA"
     CDS             7878..8033
                     /codon_start=1
                     /product="hypothetical protein"
                     /label=hypothetical protein
                     /db_xref="SEED:fig|6666666.356839.peg.13"
                     /translation="MKQPISIAPFLWCHQTEKISSVEIRHGKGVQGIIIRPDGRRWNPP
                     KGAFNR"
     CDS             8097..8375
                     /codon_start=1
                     /product="hypothetical protein"
                     /label=hypothetical protein
                     /db_xref="SEED:fig|6666666.356839.peg.14"
                     /translation="MFKGESRAQSFWERAALETREIILFSAKPKLKSRHVNYSWHQFTA
                     EERAAIWSAIKRIRAICDETALFGPDDFLKTSNQNGTPNQPNPSPIH"
     CDS             8447..8677
                     /codon_start=1
                     /product="hypothetical protein"
                     /label=hypothetical protein
                     /db_xref="SEED:fig|6666666.356839.peg.15"
                     /translation="MKNAEVKTMTVAADGALIELLNKARLEERKDQHLSFSLRLAALAI
                     RAQQRDLSAAELVELMRQESERFEHSAQGLS"
     CDS             8677..8901
                     /codon_start=1
                     /product="Phage protein"
                     /label=Phage protein
                     /db_xref="SEED:fig|6666666.356839.peg.16"
                     /translation="MDSMDMAQEREAFIRETQIQQARQQSGCAVSAFVCESCDAPIPEA
                     RRVAVPGVRLCVYCQGDAELKNKHYRGAL"
     CDS             8898..9734
                     /codon_start=1
                     /product="Methyl-directed repair DNA adenine methylase (EC 
                     2.1.1.72)"
                     /EC_number="2.1.1.72"
                     /label=Methyl-directed repair DNA adenine methylase
                     /db_xref="SEED:fig|6666666.356839.peg.17"
                     /db_xref="GO:0009007"
                     /translation="MSIIATPLKWVGSKARVMDILREHLPAGDRLVEPFAGSCAVMMNT
                     DYPEYLIADINPDLINLYQVIKEDLKDFIDTAEGLFRTANTAESYYRFRQVFNRSKENR
                     TTSAALFLYLNRHGYRGVCRYNRAGGFNVPYGHYASPYFPLAEIQAFAEKARRAKFICA
                     AFGETLQLIRSGDVVYCDPPYIPQTPTASFTSYHTDGFTHNDQYDLCSALSRLAERGIP
                     VIASNSDTHHAHSLYHRFDICRFTAPRSVGVAAGESKQAGEIIAKRLPVHGQRGAA"
     CDS             9734..10648
                     /codon_start=1
                     /product="Modification methylase ScrFIA (EC 2.1.1.37)"
                     /EC_number="2.1.1.37"
                     /label=Modification methylase ScrFIA
                     /db_xref="SEED:fig|6666666.356839.peg.18"
                     /translation="MRAIDLFAGFGGSSTGARMAGVHVVWAANHWPAAVEYHRLNHPDA
                     IHVCQDLHQADWSSVPAHDLMMASPCCQGHSRARGKAAGNPQHDASRSTAWAVVSAAEY
                     HKPSAVIVENVPEFLNWALYPAWAAAMAALGYALSPHIVDCADLGVPQNRVRLFLICTR
                     SRSPLLLDLPRIGHVPAASFIDFEGGKWSPVNRPGRAISTLERIENGRQQFGDRFVFSY
                     YGNTKTGRSLSRPIGTITTRDRWAIVDGDRMRMMTKREVLAAMSFSSSYITPDSHRLTV
                     NMAGNAVPPVAMCRVVGAIGGCL"
     CDS             10645..10932
                     /codon_start=1
                     /product="Phage protein"
                     /label=Phage protein
                     /db_xref="SEED:fig|6666666.356839.peg.19"
                     /translation="MSILQLAVMGEYFAAMKAGLKPFEYRLDNAYWRRRLIGRDYEQLV
                     ITWGYPARSDMSRRLILPWLGYEMQTITHPHFGDKPVNVFAIRISDGVCE"
     CDS             10929..12986
                     /codon_start=1
                     /product="Putative replication protein"
                     /label=Putative replication protein
                     /db_xref="SEED:fig|6666666.356839.peg.20"
                     /translation="MTDLQILEHNGAYHAVREWQREQFSPGEPAGLSFVERSLWHLNKI
                     DHDWRQQYLAGMPDYLAKYFGQRYEKLFKSDEHKGRRRANTFLLRTVGKSVLPRLRTVT
                     ERYQTQQRAAGDLPFPFYDDLEKLPVYDRDNIRALSQQVADFMAASLRDYTENRIRNTG
                     ELTDRYITLLSFRHLGLLTLQAGTQPPYWAQFTKSRHPLSTEKAESGLLRMMSPEWWRA
                     RLKRRRDIQREHMAIAVGQVQKAASPYVSRSTLDEWKEQKRRNREFFKAFELEDEEGNR
                     VSLDDKVNASNANPAIRRCELMVRMRGFEDLAQEMGCAGEFYTITAPSRYHAVHSGGGF
                     VEQWSGASPRDTQKYLCGVWARIRAELSREEISVFGFRVVEPHHDGTPHWHLLLFMRPE
                     HIEQVRDIMAYHARREDADELNSEKAQKARFHYEPIDPEKGSATGYIAKYISKNIDGYA
                     LDGEADEETGENLRDMAKAVSAWASRWRIRQFQQIGGAPVTVYRELRRLGDKQLDNAAM
                     DAVLAAADVGDWAAYTQAQGGPLVSRDALVVRLSYEVTERANQYAEDVQKVQGVYSPLL
                     GAHSAIITRTVEWKIVPKQAAASAGAGVSGGPAAAWSSVNNCTPGLRRRLSELLRLRGF
                     PPDPVLVDVLIRGGNLAMSEGRALKMVNGRLEEVRKTGDCELWTGWNWES"
     CDS             13128..13823
                     /codon_start=1
                     /product="Methyltransferase"
                     /label=Methyltransferase
                     /db_xref="SEED:fig|6666666.356839.peg.21"
                     /translation="MGYLGSKAASGAYQKIIAAMPPHDTYIETHLGSGAVMVRKPAAVR
                     SVGIDIDGEALRHFSIGHSIGAGGLQHVTLIDADAVEYLREFDFASAGQVLIYADPPYL
                     PETRTSRARYRFEYTVEQHRELIAVLRSVPASVMISGYPSALYDELLGDWRSITFQVMT
                     RGGVRTEQLWVNYPEGAAYDATFAGENYVDRQRIKRKAQRWADNYRAMSRPERLAIMSA
                     LQGVDASDC"
     CDS             13985..14143
                     /codon_start=1
                     /product="hypothetical protein"
                     /label=hypothetical protein
                     /db_xref="SEED:fig|6666666.356839.peg.22"
                     /translation="MEVSVFVERVGLLAKLTEHGGADEHDKDVALAWINEMVNEFVSRE
                     VNGFERE"
     CDS             14524..14796
                     /codon_start=1
                     /product="hypothetical protein"
                     /label=hypothetical protein
                     /db_xref="SEED:fig|6666666.356839.peg.23"
                     /translation="MVAGDEVYNSAPYKKEGVMSSIAALRLGNPVERLARVLKENQDKL
                     NLSKDGFVSVDLSNEEALKAIRDQMDKLEGIKTSTVKAKHYYRTR"
     CDS             complement(14765..14887)
                     /codon_start=1
                     /product="hypothetical protein"
                     /label=hypothetical protein
                     /db_xref="SEED:fig|6666666.356839.peg.24"
                     /translation="MERLYLYRVESDRFTYKKPLTKITAKSNVAIIGFCNNVLL"
     CDS             14910..15638
                     /codon_start=1
                     /product="hypothetical protein; Hypothetical transmembrane 
                     protein"
                     /label=hypothetical protein
                     /db_xref="SEED:fig|6666666.356839.peg.25"
                     /translation="MAAWGIVFFLAGGFLTFALNISGGFRWLSNALNLTPDSFNGMLSA
                     TTDRSQRINEIKQIAWVVISIVLAALFGWLNKQRTSKGDRRWDALAKAVGNNAFESLLM
                     EASARQFPIIATLSSRKIYVGLVTCPALENGLSEHLEILPMLSGYRDKDDLTISITTNY
                     HQHYLESGIIGGMSRLNIQDFRVLIPKDEVETISFFDTETYNKFKEDEARDRKNCRNLG
                     GKKPSTRRRRTTDDAEQDSA"
     CDS             complement(15893..16957)
                     /codon_start=1
                     /product="Phage-related capsid packaging protein"
                     /label=Phage-related capsid packaging protein
                     /db_xref="SEED:fig|6666666.356839.peg.26"
                     /translation="MAKRRKPQPPATLAAAPTGPAGVEAFSFGDPIPVLDRRELLDYIE
                     CVRTDRWYEPPVSFEGLARTFRAAVHHSSPIFVKRNILTSTFIPHPLLSQQAFSRFVQD
                     YLVFGNAYLEMRTNRLGGLLSLQPTLAKYTRRGLDLDTYWFARYGYNSQPYAFEPGSVF
                     HLMEPDLGQEIYGLPEYLSAIPSALLNESATLFRRKYYLNGSHAGFILYMSDGQQNQED
                     VNNIRQAMKSAKGPGNFRNLFLYSPNGKPDSVKVIPVSEVAAKDEFLNIKNVSRDDMLA
                     AHRIPPQMMGIIPNNVGGFGDVGKASKVFVRNELMPLQRQILALNEWAGIEVIRFDSYQ
                     LDVEDGNLSVSISK"
     CDS             complement(16957..18771)
                     /codon_start=1
                     /product="Phage terminase, ATPase subunit"
                     /label=Phage terminase, ATPase subunit
                     /db_xref="SEED:fig|6666666.356839.peg.27"
                     /translation="MGRSGTAGGSGRSLADMETTAQHTDLDPRRQAMFLWFQGLRIARI
                     AEMLGEKPATVHSWKKRDKWGDYGPLDQMQLTTAARYCQLVMKPVKEGKDFKEIDLLAR
                     QAERHARIGKFNNGGNEADLNPKVANRNNSPRKPPEKNVFTDDQIEKLVDVFHRGMFDY
                     QRHWWEAGNKYTVRNLLKSRQIGATYFFAREALIDALTTGRNQIFLSASKAQAHVFKQY
                     IIEFAREVDVELKGDPMTLPNGTTLYFLGTNARTAQSYHGNLYLDEYFWIPKFQELQKV
                     ASGMALHKQWRQTYFSTPSSLTHSAYPFWSGTLFNRGRAKADRIDIDLTHAHLSPGVLC
                     PDGQYRQIVTVEDAVRGGCNLFDLDQLRLRYSPADYQNLLMCDFIDDLASVFPLSDMQA
                     CMVDSWEVWDDFQPLLLRPFGRYPVWIGYDPAKGTQNGDSAGCVVLAPPQALGGKFRIL
                     ERHQWRGMDFRAQAEAIRKLTEQYNVTYIGIDSTGVGHGVYQNVKQFFPAAREFVYNPN
                     VKNALVLKAYDVISHRRLEFDAGHTDIAQSFMSIRKAMTASGSRPTYEASRSEEASHAD
                     LAWATMHALFNEPLEGENANSHNIVEIF"
     CDS             18869..19702
                     /codon_start=1
                     /product="Phage capsid scaffolding protein # Fam Scf032"
                     /label=Phage capsid scaffolding protein # Fam Scf032
                     /db_xref="SEED:fig|6666666.356839.peg.28"
                     /translation="MAAKANARRFRIGVEGATTDGRTIERAWLEQMAANYDPAVYTALI
                     NMEHIKGYTPDSPFRRYGKIEALETEEIQDGLLSGKLALYAYLAPTDDLIALTQKWQKI
                     FTSMEVNPDFADTGAAYLVGLAVTDDPASLGTEMLTFSAGAKHNPLAARKQAPGNLFTA
                     AEETSLVFELDDNKPSLFGRISALFAKKQTSDDARFGDVHQAVELVAQEQQQLAGQVQQ
                     HGAQLARLSTLETDLQAQKTELASLKETLGKQDRNPAFRPLSTGGADIATVLTDC"
     CDS             19717..20826
                     /codon_start=1
                     /product="Phage major capsid protein #Fam0066"
                     /label=Phage major capsid protein #Fam0066
                     /db_xref="SEED:fig|6666666.356839.peg.29"
                     /translation="MKKDTRFKYNAYLTQLAALNNVPVEDVGTKFTVEPSVSQTLEDKI
                     QESSAFLTLINIVPVDEQSGEVLGLGIGQTVAGTTDTTQKEREPTDPTYIDGSGYKCTQ
                     TNFDTALPYSKIDLWAKFQDFQTRIRNAIVQRQALDRIMIGWNGVQREKNSNRVKYPLL
                     QDVNIGWLEKIRQEAPAHVIGNIVDDNGQEISRKIRVGKGGDFDNLDALVMAAVNEKIA
                     VQYQDDTELVVICGRQLLADKYFPLVNKEQDNSEKLAADLIIGQKRMGGLQAVRVPFFP
                     ANALLVTRLDNLSIYWQDGTRRRAVIDNPKRDRVEDFESVNEAYVVEDYDCTCLIENIT
                     LGEFAASAAAQVAENGGTPATPDDPNAGA"
     CDS             20829..21491
                     /codon_start=1
                     /product="Phage terminase, endonuclease subunit"
                     /label=Phage terminase, endonuclease subunit
                     /db_xref="SEED:fig|6666666.356839.peg.30"
                     /translation="MALNPFQRHTRFIQGQQAAHSGGTARPLSGYDRMLMQLTEDQMRL
                     KRIQSQEKKAELKRQLLPAYAPWVAGVIAADGQRQDDVLMHVMVWRIDAGDYDGALTIA
                     RHVLRHDWVMPKRYTRTTACTVAEEFADAAIRAFLARQSFDAGLLQAALDLTADADMPD
                     QSRARLYKSLGYAQRLADCPAPALDNLRRALELDQRCGVKKDIEQLERQLRNAENGG"
     CDS             21584..22048
                     /codon_start=1
                     /product="Phage head completion-stabilization protein"
                     /label=Phage head completion-stabilization protein
                     /db_xref="SEED:fig|6666666.356839.peg.31"
                     /translation="MSFIAPESAPAQQDLIKNTAFWPDLDIAHFRDAMRTDGTVTPPRL
                     RQAVLTAISEVNAELFDWRQRQLADGYTSLADVPGEQLDGEPERLHLYRRAVWCWARAN
                     LAERYRDYDATAAGNKRADALEPAIDDLWRDVRWALSRLQSQPHVIVELI"
     CDS             22048..22251
                     /codon_start=1
                     /product="Phage tail X"
                     /label=Phage tail X
                     /db_xref="SEED:fig|6666666.356839.peg.32"
                     /translation="MQVRAQQHDTVDALCWRHYGRTAGLTEQVLAINPGLADIGPILPH
                     GLLVELPDVALAATQETLQLWD"
     CDS             22255..22551
                     /codon_start=1
                     /product="Phage holin # possibly family II"
                     /label=Phage holin # possibly family II
                     /db_xref="SEED:fig|6666666.356839.peg.33"
                     /translation="MNETDKSIVTLFIIGMLIAVGKVLAGGEPVTLRLFLGRVLLGGFV
                     STVAGVALVQFPDLSPLAINGIGAALGIAGYQTIELLIQRRAKQLSDKAGGNE"
     CDS             22577..23029
                     /codon_start=1
                     /product="Phage lysin, 1,4-beta-N-acetylmuramidase (EC 
                     3.2.1.17) or lysozyme #Protein S in phage lambda"
                     /EC_number="3.2.1.17"
                     /label=Phage lysin, 1,4-beta-N-acetylmuramidase
                     /db_xref="SEED:fig|6666666.356839.peg.34"
                     /translation="MLAFSEGTANHPLTRNRGYDVIVTGADGAPEIFTDYRDHPFANGR
                     PAKVFNKQGQRSTAAGRYQQLYRYWPTYKKQLRLPDFSPASQDTLAIQLIRERRALDDV
                     LAGRIACAIVACNNIWASLPGAGYGQREHDAVRLLSVYQQAGGRLA"
     CDS             23026..23460
                     /codon_start=1
                     /product="Phage spanin Rz #LysB"
                     /label=Phage spanin Rz #LysB
                     /db_xref="SEED:fig|6666666.356839.peg.35"
                     /translation="MSLWLKVAALMVLLVAAVAVQSWRLSHAQQLADQQAQTLTAQHAA
                     LTEQASQLKSLADLAERNNAEQARLRSLAADTQEALTERQKTLARLQRENEALKRWADT
                     ALPDDIIRLRQRPALTGGRTYREWLSQANALPVSGGQPAN"
     CDS             23553..23984
                     /codon_start=1
                     /product="Phage tail protein # FIG072132 and FIG003673"
                     /label=Phage tail protein # FIG072132 and FIG003673
                     /db_xref="SEED:fig|6666666.356839.peg.36"
                     /translation="MNKPRLLRNALSSAVPHLRDNPDRLHVFVESGTVVGTLAPSLSWE
                     YRYTLTLIVTDYAGNEDLLVAPVMAWLREHQPDLLANPEKREKGVEFETEILNNGSVDI
                     SISLKLTERVQVRAGSGNQVVEPLLEPGEPDDYWIDRRG"
     CDS             23977..24420
                     /codon_start=1
                     /product="Phage tail completion protein"
                     /label=Phage tail completion protein
                     /db_xref="SEED:fig|6666666.356839.peg.37"
                     /translation="MDNLQRIDDWLAALLAKLTPAERKALLRGVARDLRKRQQERIRLQ
                     QNPDGTAFEPRRVSLKDKKGRIRRQMFSKLRAAKYLKASATATEADVGFIGSAQRLARV
                     HHYGLRDRVREHGPVVKYAARQLLGMDTELINHILNKLHVSIK"
     CDS             complement(24430..26064)
                     /codon_start=1
                     /product="hypothetical protein"
                     /label=hypothetical protein
                     /db_xref="SEED:fig|6666666.356839.peg.38"
                     /translation="MLQVSNGNFFNPDDDIQESVHRAPIYTNAIFFDDNIETPIGKLLN
                     TTINSSYKIIIAEMNCKQKNKFNNGESNPLSCMGGNEMIADISAIFSFSMNATCTTSSH
                     LIESLLQGDTSNSYKRPFLFISQFFDQDVILKDREIKHFKNLISMMLKMNRKDYEVALK
                     SIHRYVSAMYRILDDSHAAYSLLVASLEALAQTEKGNYQASWNDYDKAKRNLIDQEIAT
                     LPPEKQDLIRNEIIKEKHAKIGKNYVNYIISNIEDDFYRVDRRDYRKISRDDLLLALKN
                     AYDLRSSYIHELKKIPKEISGFPTHDMRVLIDDKPFLTFNGLAVVAREVIKNFIIKSKK
                     EERKEEIYDEVIHGIFDIKKTDEYWIANPNKYTKSEIKRYLNIIIDMIEKNRLNPCGNK
                     IIDMHGLMVEIEKKIKGENNKDDKAIMVLTFLLIKKFFHLHEDIKSKINIENSRKLFSE
                     LNINSLVFIALLREKFIFQPRDAYEFMEKYRANRYEKPSINISEYAEYNIMIKIMTESF
                     RIGDTQTHAHTMEFISGMPNYDKLIGK"
     CDS             26201..26734
                     /codon_start=1
                     /product="Phage baseplate assembly protein V"
                     /label=Phage baseplate assembly protein V
                     /db_xref="SEED:fig|6666666.356839.peg.39"
                     /translation="MNAQTTEIMRLLLNLIRVGVVIDVDPNNWLCRVQTGELQTGWLNW
                     LTTRAGRARTWWKPSQGEQVLLLAIGGELTTAFVLPAIFSNDNPPPSASDDALVTVFPD
                     GARFEYEPANGQLLIDGVKSVVLNADTLTLNAAVTINGQVTQQGGDMSSNGVVVHTHQH
                     GGVQGGGSNTGGPV"
     CDS             26734..27081
                     /codon_start=1
                     /product="Putative phage protein"
                     /label=Putative phage protein
                     /db_xref="SEED:fig|6666666.356839.peg.40"
                     /translation="MRYLGMNQQTGGRISEMAHLRQSVRDILITPLGSRLARREYGSLL
                     SELLDQPQNAATRLQVMAAIYGALHRWEPRLQLTAIDLTTTLDGRMVADLTGELVSGQS
                     AALSVSLGSDA"
     CDS             27078..27986
                     /codon_start=1
                     /product="Phage baseplate assembly protein J"
                     /label=Phage baseplate assembly protein J
                     /db_xref="SEED:fig|6666666.356839.peg.41"
                     /translation="MSVIDLSQLPAPDIVTVPDFETVLAARKAAYLALFPADERDAVAA
                     TLALESEPVVKLLQENAYREILLLQRINEAAQACMVAYALGNDLDQLAANYNVDRLTVT
                     PADETAVPPVDAVLESDDDLRQRIPAAFEGLSVAGPTGAYAFHALSADGRVSDATAISP
                     SPAAVTVTVLSRESDGAAPDDLLAAVAAALNDESVRPVADRVTVQSARVVPYAVTARLY
                     LYPGPEAEPIRQAAEAKLTAYISAQRRLGRDIRRSALYAALHVEGVQRVELDSPAADVV
                     LDDTQAAYCTGNQVTIGGNDE"
     CDS             27979..28587
                     /codon_start=1
                     /product="Tail protein I"
                     /label=Tail protein I
                     /db_xref="SEED:fig|6666666.356839.peg.42"
                     /translation="MNNSLLPPGSSALERRLAAACGDISALSVPIRRVWNPDTCPASFL
                     PYLAWAFSVDRWDEHWPEAVKRQVIKDAFFIHRHKGTIGALRRVVEPFGYLIRITEWWQ
                     IGGTPGTFRLDIGVQDAGITEETYLELERLIADAKPVSRHLLGLAIHLDSRGALPVSAG
                     QYSGDALTVYPYFPEILTTGGADRRAAAVHLSDNVSVSA"
     CDS             28584..29723
                     /codon_start=1
                     /product="Tail fiber protein"
                     /label=Tail fiber protein
                     /db_xref="SEED:fig|6666666.356839.peg.43"
                     /translation="MTTKYYAILTNTGAALLANATALGRQLPITQMALGDGGGTLPTPD
                     TAQTKLVNERRRAPLNSLSVDPVNPSQIIAEQVIPEDEGGWWIREIGLYDAGGNLIAVA
                     NCPETYKPQLQEGSGRVQTVRMILIVSSTDAVTLKIDPSVVLATRAYTDGKAAEAKAYT
                     DAQTGGAKIEVKAYTDNMLTAHLAAANPHPQYAVSADVAVAMKAKLDVADVVGIPLPWP
                     QAVAPSGWLKCNGQAFDKALYPKLATAYPSGVLPDLRGEFIRGWDDGRGVDSGRGLLSA
                     QRATLLRTAMIDYAGTDLDNSSVLNGLAYAEADGSTKSIYPASAIYAPNGDNLSNTAAA
                     DNAVSGTSSFAAFQTGVTPPNWISVRSRNVAFNYIVRAA"
     CDS             29723..30346
                     /codon_start=1
                     /product="Tail fiber assembly protein"
                     /label=Tail fiber assembly protein
                     /db_xref="SEED:fig|6666666.356839.peg.44"
                     /translation="MSEKYSVAVQNAGLGKNGLAERAGWLTVYHVDPLTREYTGASYEY
                     LMIGTGLPADSYVDAPDLPGAGQALRRTADGSVWEHVPDLRGKTAYSTTNGQAQTVQDI
                     GALPGGLTLLAPATAFDAWNGDQWVTDTGAQQAAAIAVAAQTLADRKAVAVARINELNY
                     AVTLGMATRAEKDALTDWQTYLVQLSRIDTAAAPDIDWPAAPEK"
     CDS             30440..31612
                     /codon_start=1
                     /product="Phage major tail sheath protein"
                     /label=Phage major tail sheath protein
                     /db_xref="SEED:fig|6666666.356839.peg.45"
                     /translation="MATDYHHGVRVTEINDGTRTITTVSTAIVGLVCTADDADAATFPL
                     NKPVLITDVLTASGKAGESGTLARALDAIADQAKPVIVVVRVPQGESEAETTSNIIGGV
                     TADGKKTGMKALLAAQAQLGVKPRILGVPGHDNKAVAVELASIAQSLRAFAYVSAHGCK
                     TVADAIAYRGNFSQRELMVIWPDFVAWDTVADAEATAWATARALGLRAKIDEQTGWHKT
                     LSNVGVNGVTGLSADVFWDLQDSATDAGLLNQNAVTTLIRKDGFRFWGSRTCSDDPLFA
                     FESYTRTAQVLADTMAEAHMWAVDKPLTPSLARDIIEGIRAKLRELVAQGYLLGGDCWI
                     DESVNSKDTLKAGKLAIDYNYTPVPPLENLLLRQRITDTYLMDFTGQVSG"
     CDS             31624..32139
                     /codon_start=1
                     /product="Major tail tube protein"
                     /label=Major tail tube protein
                     /db_xref="SEED:fig|6666666.356839.peg.46"
                     /translation="MALPRTLKYLNLFNDGNNFMGVVESFTPPKLTRKLEKFRGGGMSG
                     TVDIDMGLDDGALECEWQIGGWEPLIFKQLGTAKADGVQLRFTGSIQRDDTGEVQAVEI
                     VLRGRHKEVDSGEAKQGEKTTTKISTVCTYYKLTINGDVLVEIDILNMIENIGGEDRLA
                     EHRSAIGL"
     CDS             32200..32502
                     /codon_start=1
                     /product="GpE+E'"
                     /label=GpE+E'
                     /db_xref="SEED:fig|6666666.356839.peg.47"
                     /translation="MQELNTEKTVTLDSPLKRGDTVIDSITIRKPTSGALRGVRLQALM
                     EMDVNAVMVVLPRVTAPALTATEVLELDPADLVALAVEVVTFLLPKSARQDSPAS"
     CDS             32517..32636
                     /codon_start=1
                     /product="hypothetical protein"
                     /label=hypothetical protein
                     /db_xref="SEED:fig|6666666.356839.peg.48"
                     /translation="MADIATVFHWPPAVTADMPLTEVLTWRHKAILRSGAGDE"
     CDS             32629..35466
                     /codon_start=1
                     /product="Phage protein"
                     /label=Phage protein
                     /db_xref="SEED:fig|6666666.356839.peg.49"
                     /translation="MSNSLRLQVVLDAVDKLTRPLRQAQAGSKGLSTAIKESQVRLKAL
                     DTQAARIDGFRKASAQAAVVSNSLKGAREEAARLATQFAATERPTAQQARLLQQAKDRV
                     NELQDKYNGLRVSVQRQREALSASGIDTKKLSDAQRQLRSEAQSVTDSLQRQQQALKQL
                     GERQQKLNAIKARHEKTLDTRNKLAGTGGTMVATGVATAAPMIAPIKAYADSEDAATQL
                     AGSMMGPGAKVSAEFEKINTLAVSLGDRLPGTTADFQNMMTMLRRQGLSAQSILGGTGE
                     AAAYLGVQLKMAPTEAAEFAAKMQDATGTAEKDMMPLMDIIQKGFYAGVDPTNMLGGFA
                     KIGSAMSIIKKDGIEAAKIFAPLLVMADQASMEGGAAGNAYRKIFQAAMKTDKVKDVND
                     DLKDKKIKIKFDFTNGKGEFGGLEKMYAQLGQLQKLNTETRLKVLKDIFGDDAETLQAL
                     NIMITKGLDGYRETQAKLEQQASLRERVDAQLQTLGNKWDAATGSFTNAMASIGATVAP
                     DLKQLIDGLGELAGKLNDFVKAHPVLVSSLFKSAAGFAIAATAIGILFVAIASVMGPLS
                     LLRMSLGMLGLKLPTLGGAVARFAGLFGSVGSVFSGLGRLLLWLVASPFALLRPALMFV
                     GGILGALLSPVALFMAAVVAVGVAIYQHWEPIKAFLGGVVDGFTAAAGPIVAAFEPLKP
                     VFAWVGDKVQALWKWFTDLLEPVKWSAAELDNAAAMGRKFGEFLADGLSKVMHPLDSLK
                     SGVSWLLEKLGVVKTESDKLPSADVIQKAQDAKAAATAPVNPTNATPWGAPPVYSPFAG
                     MYDSGGIIPSGQFGIVGENGPEIVNGPARITSRRHTAALAAAVLGAAASPVLAQPLHPF
                     SLPASQYGSAGQEYSAGRLATAAPVTVNAPISIYTQPGQNATDIAREVARQLDERERRA
                     RAKSRSNYSDQGGIG"
     CDS             35463..35996
                     /codon_start=1
                     /product="Phage-related tail protein"
                     /label=Phage-related tail protein
                     /db_xref="SEED:fig|6666666.356839.peg.50"
                     /translation="MININLSVSVMMALGLFVFGLQTVPYQELQRQRNWRHVTNSRIGQ
                     RPSWQFIGPDSDTLTLQGVLLPEITGGRLSLLMLEKMAESGKAWSLIEGTGTIYGMYVI
                     ESLSETRTLFFFNGSARRIEFTITLKRVDGDFGAVTGSLSEQWTSLKDSATGYADKVTA
                     AAGQAVDAVKGVFS"
     CDS             35993..37102
                     /codon_start=1
                     /product="Gene D protein"
                     /label=Gene D protein
                     /db_xref="SEED:fig|6666666.356839.peg.51"
                     /translation="MSLLDQMSTGRESAPDYRITISGKDVTETLDKRLMSLTITDNRGF
                     EADQLDLELDDADGQLMLPRRGAQITVFLGWKGYALTKKGTFVVDEIEHSGAPDRLTVR
                     ARSADFRQTLNIKREKSWHQTTVGAIVREIADRHKLVAALDEATAAQKVEHIDQTNESD
                     CSFLVRLAKDHGAIAAVKDGRLLFLRQGQGKTASGKPLPAAIITREDGDSHRFTLADRG
                     AYTGVVANWLHTKEPKKKQEVKVKRRRRRRRTSTKKKKEPEAKQGEYLIGTDENVLVLS
                     RTYANKANAERAAKMHWERLQRGTASFSIDLARGREDLFPELPVKVSGFKQEIDMADWT
                     ITTVTHSLNDRGFITSLEFEVKIDNLDME"
     CDS             37182..37397
                     /codon_start=1
                     /product="Prophage P2 OGR protein"
                     /label=Prophage P2 OGR protein
                     /db_xref="SEED:fig|6666666.356839.peg.52"
                     /translation="MMKCPLCGNAAHTRSSFEVTDTTKERYNQCTNINCGHTFISHETF
                     VRSIARPGVVQHVAPHPKGQQVVMNL"
     CDS             complement(38020..38442)
                     /codon_start=1
                     /product="hypothetical protein"
                     /label=hypothetical protein
                     /db_xref="SEED:fig|6666666.356839.peg.53"
                     /translation="MAIDFFNKSMQEQPLMKKFLLSVLIAATFSAAADPVPQKIEELIK
                     VYQTKSHSLEGGKLTIVIKKPQITEETIRLFFNGVCSGQFDKNPWPPETITSVVMLNAD
                     GNQGYTVKGGGKECKKLGPMLGDEADAYIKSLIYAN"
     tRNA            complement(38525..38597)
                     /product="tRNA-Met-CAT"
                     /note="/transl_table=11"
                     /db_xref="SEED:fig|6666666.356839.rna.1"
     CDS             complement(38859..40694)
                     /codon_start=1
                     /product="RNA polymerase sigma factor RpoD"
                     /label=RNA polymerase sigma factor RpoD
                     /db_xref="SEED:fig|6666666.356839.peg.54"
                     /db_xref="GO:0003677"
                     /db_xref="GO:0003700"
                     /db_xref="GO:0006352"
                     /db_xref="GO:0016987"
                     /db_xref="GO:0030528"
                     /db_xref="GO:0045449"
                     /translation="MEQNPQSQLKLLVTRGKEQGYLTYAEVNDHLPEDIIDSDQIEDII
                     QMINDMGIQVMEEAPDADDLMLAENTADEDAAEAAAQVLSSVESEIGRTTDPVRMYMRE
                     MGTVELLTREGEIDIAKRIEDGINQVQCSVAEYPEAITYLLDQYDRVEAGESRLSDLIT
                     AFVDPNAEEDLAPNTTPENAEPADDGIDDDDDESEEDEDDTDDDNSIDPELARQKFAEL
                     RDQYEATRVSIKAHGRSHPTAIDEINKLSEVFKQFRLVPKQFDLLVNNMRAMMDRVRAQ
                     ERQIMKLCVELCKMPKKNFVTLFTGNETNRKWFDAALSMGKPWCEKLREVEDDVHRGLQ
                     KLQQIEDETGLTIEQVKDINRRMSIGEAKARRAKKEMVEANLRLVISIAKKYTNRGLQF
                     LDLIQEGNIGLMKAVDKFEYRRGYKFSTYATWWIRQAITRSIADQARTIRIPVHMIETI
                     NKLNRISRQMLQEMGREPTPEELAERMLMPEDKIRKVLKIAKEPISMETPIGDDEDSHL
                     GDFIEDTTLELPLDSATSESLRSATHDVLAGLTAREAKVLRMRFGIDMNTDHTLEEVGK
                     QFDVTRERIRQIEAKALRKLRHPSRSEVLRSFLDD"
     CDS             complement(40851..42605)
                     /codon_start=1
                     /product="DNA primase (EC 2.7.7.-)"
                     /label=DNA primase
                     /db_xref="SEED:fig|6666666.356839.peg.55"
                     /db_xref="GO:0003676"
                     /db_xref="GO:0003677"
                     /db_xref="GO:0003896"
                     /db_xref="GO:0006260"
                     /db_xref="GO:0006304"
                     /db_xref="GO:0008270"
                     /translation="MAGRIPRVFINDLLARTDIIDLIDARVKLKKQGKNYHACCPFHHE
                     KTPSFTVNGDKQFYHCFGCGAHGNAIDFLMNYDRLEFVESIEELAAMHSLDVPYEAGTG
                     PTQLERHQRQSLYELMEQLSAFYQHTLNQPAGTPAREYLSRRGLSDEVIRQFAIGCTPP
                     GWDNALKRFGRSSENRTTLTDAGMLVTNENGRTYDRFRDRVMFPIRDKRGRVIAFGGRV
                     MGEGMPKYLNSPETEIFHKGRQLYGLYEAQQKNPELKRLLVVEGYMDVVALAQFGIDYA
                     VASLGTSTTADHIQLLFRATDQVVCCYDGDRAGRDAAWRALETALPYLDDGRQLRFMFL
                     PDGEDPDTLVRQEGKAAFEQRIEQAMPLSAFLFDSLLQQVDMSTPDGRTKLSTLALPLI
                     GQVPGETLRLYLRQQLGNKLGLLDDSQLDRLLPKAAEQTSSYQPPRLKVTTMRILIGLL
                     VQNPRLSFEVPELALDGVEENKVAGLELFLDLVKTCNESPGMNMGLLLEKYRESKYRKQ
                     LETLAAWDHMIEEEELEEKFRVSLTELYDQLLQLRMDTLIARERTHGLNMNERKELWSL
                     QLALTRKN"
     CDS             complement(42733..42948)
                     /codon_start=1
                     /product="SSU ribosomal protein S21p"
                     /label=SSU ribosomal protein S21p
                     /db_xref="SEED:fig|6666666.356839.peg.56"
                     /db_xref="GO:0003735"
                     /db_xref="GO:0005622"
                     /db_xref="GO:0005840"
                     /db_xref="GO:0006412"
                     /translation="MPVIKVRENEPFDVALRRFKRSCEKAGVLAEVRRREFYEKPTTER
                     KRAKASAVKRHAKKLARENARRTRLY"
     CDS             42975..43124
                     /codon_start=1
                     /product="hypothetical protein"
                     /label=hypothetical protein
                     /db_xref="SEED:fig|6666666.356839.peg.57"
                     /translation="MLLALCQPFQNGAEFYCNCGAFVKRISDHKTRGAGSLVCGLAYDR
                     LCSA"
     CDS             43195..44208
                     /codon_start=1
                     /product="TsaD/Kae1/Qri7 protein, required for 
                     threonylcarbamoyladenosine t(6)A37 formation in tRNA"
                     /label=TsaD/Kae1/Qri7 protein, required for threonylca
                     /db_xref="SEED:fig|6666666.356839.peg.58"
                     /translation="MRVLGIETSCDETGVAIYDTQAGLLANQLYSQVTLHADYGGVVPE
                     LASRDHVRKTVPLIQAALKEAGLQRSEIDGVAYTAGPGLVGALLVGATVGRSLAFAWNV
                     PAIPVHHMEGHLLAPMLEDNPPAFPFVALLVSGGHTQLISVTGIGEYRLLGESIDDAAG
                     EAFDKTAKLLGLDYPGGPLLSKMAQNGHSKRFVFPRPMTDRPGLDFSFSGLKTFAANTI
                     RENGSDAQTQADIARAFEDAVVDTLAIKCRRALDDTGFSRLVMAGGVSANRTLRQRLAD
                     IMAKRGGDVFYARPEFCTDNGAMIAYAGAVRLAQGVTDELGITVRPRWPLAELPAL"
     CDS             complement(44254..44724)
                     /codon_start=1
                     /product="Arginine pathway regulatory protein ArgR, 
                     repressor of arg regulon"
                     /label=Arginine pathway regulatory protein ArgR, repre
                     /db_xref="SEED:fig|6666666.356839.peg.59"
                     /translation="MRNSTKQEDLVKAFKALLKEEKFSSQSEIVQALQDDGFENINQSK
                     VSRMLTKFGAVRTRNAKMEMVYCLPAELGVPTTTSPLKNLVLDVDYNDAVVVIHTSPGA
                     AQLIARLLDSLGKSEGILGTIAGDDTIFTTPARGFSVKQLYEAILVLFEQEL"
     CDS             44704..44823
                     /codon_start=1
                     /product="hypothetical protein"
                     /label=hypothetical protein
                     /db_xref="SEED:fig|6666666.356839.peg.60"
                     /translation="MFRGVTHSAPCPGKVEYAAIMHLNEFLCNMSAYKTELSA"
     CDS             45215..46156
                     /codon_start=1
                     /product="Malate dehydrogenase (EC 1.1.1.37)"
                     /EC_number="1.1.1.37"
                     /label=Malate dehydrogenase
                     /db_xref="SEED:fig|6666666.356839.peg.61"
                     /db_xref="GO:0030060"
                     /translation="MKVAVLGAAGGIGQALALLLKTQLPSGSELSLYDIAPVTPGVAVD
                     LSHIPTDVKIKGFSGEDATPALEGADIVLMSAGVARKPGMDRSDLFNVNAGIVRNLVSQ
                     IARTCPNACIGIITNPVNTTVAIAAEVLEQAGVYNKDKLFGVTTLDIIRSSTFVAELKD
                     KQPQAIDVPVIGGHSGVTILPLLSRIPGVSFTEQEVADLTKRIQNAGTEVVEAKAGGGS
                     ATLSMGQAAARFGLSLVRALQGESGVVECAYVEGDGKHARFFAQPLLLGKNGVAERKDI
                     GTLSAFEQQALVSMLDTLKQDIALGEEFVNKK"
     CDS             complement(46227..46508)
                     /codon_start=1
                     /product="Ner-like regulatory protein"
                     /label=Ner-like regulatory protein
                     /db_xref="SEED:fig|6666666.356839.peg.62"
                     /translation="MNSRKNDWHPADIIAALRKKGTTLAAVSRAAGLSSSTLANALSRP
                     WPKGEWLIADALGIHPSEIWPSRYYDPETQELLDRKKLIRPQSDPQSE"
     CDS             46853..47083
                     /codon_start=1
                     /product="hypothetical protein"
                     /label=hypothetical protein
                     /db_xref="SEED:fig|6666666.356839.peg.63"
                     /translation="MPQSVQQTLLIQETSGEYSAKPSDMLSVWIQIYHQLSVPEREKLI
                     AYIMREGVSSTLKQLGLANTASATLIKDFSD"
     CDS             47304..47684
                     /codon_start=1
                     /product="hypothetical protein"
                     /label=hypothetical protein
                     /db_xref="SEED:fig|6666666.356839.peg.64"
                     /translation="MMMEKAWFTTNELLGVAGLPKSRQGLNKRAKENGWEKRRRKGVQG
                     KGVEYAIWSLPTEVKTTLMQETAPDYAGKSATVQEHTWVQIYHQLSAEERTRLIGHILR
                     EGVMGMLARLENGPQEYKNKGE"
     CDS             complement(47686..48657)
                     /codon_start=1
                     /product="Octaprenyl diphosphate synthase (EC 2.5.1.90)"
                     /EC_number="2.5.1.90"
                     /label=Octaprenyl diphosphate synthase
                     /db_xref="SEED:fig|6666666.356839.peg.65"
                     /translation="MNLEQITALSAQDMAAVNQTILDQLNSDVVLINQLGNYIISGGGK
                     RIRPMIAVLTARALNYQGDKHITIAALIEFIHTATLLHDDVVDESDMRRGKATANAAFG
                     NAASVLVGDFIYTRAFQMMTSLASLRVMSVMSDAVNVIAEGEVLQLMNCNDPDITEDSY
                     MRVIYSKTARLFEAAAQASAILSDASSEQELALQEYGRYLGTAFQLIDDLLDYSADGET
                     LGKNTGDDLNEGKPTLPLLHAMHHGNEEQRTMIRQAIEEGNGRHLLEPVLAAMQSCGSL
                     AYTRQRAEEEADKAITAIQCLPASDFRTALEGLAHLAVQRDF"
     CDS             48918..49229
                     /codon_start=1
                     /product="LSU ribosomal protein L21p"
                     /label=LSU ribosomal protein L21p
                     /db_xref="SEED:fig|6666666.356839.peg.66"
                     /db_xref="GO:0003723"
                     /db_xref="GO:0003735"
                     /db_xref="GO:0005622"
                     /db_xref="GO:0005840"
                     /db_xref="GO:0006412"
                     /translation="MYAVFQSGGKQHRVSEGQTVRLEKLDIATGEAIEFDQVLMVANGE
                     DVKIGVPFVDGGKIKAEVVAHGRGEKVKIVKFRRRKHYRKQAGHRQWFTDVKITGISA"
     CDS             49249..49506
                     /codon_start=1
                     /product="LSU ribosomal protein L27p"
                     /label=LSU ribosomal protein L27p
                     /db_xref="SEED:fig|6666666.356839.peg.67"
                     /db_xref="GO:0003735"
                     /db_xref="GO:0005622"
                     /db_xref="GO:0005840"
                     /db_xref="GO:0006412"
                     /translation="MAHKKAGGSTRNGRDSESKRLGVKRFGGESVLAGSIIVRQRGTKF
                     HAGSNVGCGKDHTLFALSDGKVKFEVKGPNNRKFISIVAE"
     CDS             49544..50554
                     /codon_start=1
                     /product="Membrane protein, putative"
                     /label=Membrane protein, putative
                     /db_xref="SEED:fig|6666666.356839.peg.68"
                     /translation="MLQGFLHLRSTIKKSIKRTGDVMKQNAVIGFCLALTTAICWGALP
                     IAMKQVLVAMEPYTIVWYRFLIASVGLGIFLYSKGALPTSQAFDHQRWWILLLIATGGL
                     LGNFVLFSSSLQYLSPTASQVIGQLSTVGLMVASVVILKEKMRPSQIIGAGVLICGLLM
                     FFNNSLVELFTRLTDYTFGILLGVAASSVWVAYGVAQKVLLRRLTSQQLLFLLYTLCVL
                     FITPLAKPGVIFQLTSWQLACLLFCGANTLVGYGALAEAMARWQAAQVSTIITLTPLFT
                     LFFSDLLALAWPAVFAAPALDLLGYVGAFVVVTGAMFSAVGHRLIALKRDKRPMV"
     CDS             complement(50607..50735)
                     /codon_start=1
                     /product="hypothetical protein"
                     /label=hypothetical protein
                     /db_xref="SEED:fig|6666666.356839.peg.69"
                     /translation="MTDNRSMSPATEKPTHQNCSDKRALIVPAWRKDFTCIKNNQP"
     CDS             50821..51996
                     /codon_start=1
                     /product="GTP-binding protein Obg"
                     /label=GTP-binding protein Obg
                     /db_xref="SEED:fig|6666666.356839.peg.70"
                     /translation="MKFVDEATILVVAGDGGNGCVSFRREKYIPNGGPDGGDGGDGGDV
                     YLLADENLNTLIDYRFEKNFRAERGQNGQSRDCTGKRGKDITIKVPVGTRVLDKSTGEV
                     LGDMTRNQQKLMVAKGGWHGLGNSRFKSSVNRAPRQKTNGTPGEERELMLELLLLADVG
                     MLGLPNAGKSTFIRAVSAAKPKVADYPFTTLVPSLGVVRMDSEKSFVVADIPGLIEGAS
                     EGAGLGIRFLKHLERCRVLLHLIDLAPIDESDPIENAKVIVNELQQYSASLAEKPRWLV
                     FNKVDLLEKGEAEKRAKEIAAALGWEGKYYLISAANREGVNSLCWDVMNFLNTQPKALS
                     EVENKAPEKVDFMWDDYHREQLEAAKAEAEEEWDDDWDEEDDEGVEIVYQR"
     CDS             complement(52100..53533)
                     /codon_start=1
                     /product="D-alanyl-D-alanine carboxypeptidase (EC 
                     3.4.16.4)"
                     /EC_number="3.4.16.4"
                     /label=D-alanyl-D-alanine carboxypeptidase
                     /db_xref="SEED:fig|6666666.356839.peg.71"
                     /db_xref="GO:0009002"
                     /translation="MRFLSILTGFSCAVALQANAVPIDEYTKYLPDGANLALVVQKIGA
                     STPTVDYHSQQMALPASTQKVITALAALLQLGPDYRFVTTMESSGTLTNGVLRGNLAVR
                     FSGDPSLKRQQLHNMVQELKKRGIREISGDVLIDTSVFASHDKAPGWPWNDMTQCFSAP
                     PAAAIVDKNCFSISLYSAPKAGDNAFIRVASYYPVQMFSEVRTLPKGSPDAQYCELDVV
                     PGELSRFTVTGCLTQRAEPLPLAFAIQDGASYAGAIVKDELQQADIRIAGSLRRQSLPG
                     AHGTVLAQTESEPLHELLTTMLKKSDNMIADTVFRTIGHERFKVPGTWRAGADAVRQIL
                     RQKAGIDLGNTIIVDGSGLSRHNLIAPATMMQVLQYIAQHDNELNYIKMLPLAGYDGTL
                     RYRAGLHEAGLDGKVSAKTGALQGVYNLAGFITTASGQRMAFVQYLSSYAVPPEDQKER
                     RIPLVRFESRVYKDIYQNN"
     CDS             53798..54274
                     /codon_start=1
                     /product="Transcription elongation factor GreA"
                     /label=Transcription elongation factor GreA
                     /db_xref="SEED:fig|6666666.356839.peg.72"
                     /db_xref="GO:0003677"
                     /db_xref="GO:0003711"
                     /translation="MKQFPMTLRGAEKLREELDFLKMVRRPEIIAAIAEAREHGDLKEN
                     AEYHAAREQQGFCEGRIQEIEAKLSNAQVIDVTKMAANGRVIFGATVTVMNVDTEEEQT
                     YRIVGDDEADFKQNLISVNSPIARGLIGKEGDDVVTISTPGGVVEYEILKVEYL"
     CDS             complement(54398..54691)
                     /codon_start=1
                     /product="FIG004454: RNA binding protein"
                     /label=FIG004454: RNA binding protein
                     /db_xref="SEED:fig|6666666.356839.peg.73"
                     /translation="MNLSNKQKQHLKGLAHPLKPVVMLGNNGLTEGVLAEIEQALEHHE
                     LIKVKIAAEDRETKGLIVDAILRETGASNVQVIGHTLVLYRASKERKIVLPR"
     CDS             54849..55478
                     /codon_start=1
                     /product="Cell division protein FtsJ / Ribosomal RNA large 
                     subunit methyltransferase E (EC 2.1.1.-) ## LSU rRNA 
                     Um2552"
                     /label=Cell division protein FtsJ / Ribosomal RNA larg
                     /db_xref="SEED:fig|6666666.356839.peg.74"
                     /translation="MANKKRSASSTRWLQEHFSDKYVQQAQKKGLRSRAWFKLDEIQQT
                     DRLFKPGMTVVDLGAAPGGWSQYVVSQNGGKGRIIACDLLPMDPIVGVDFLQGDFRDEL
                     VLKTLLERVGAEKVQVVMSDMAPNMSGTPAVDIPRAMYLVELALDMCRDILAPGGSFVV
                     KVFQGVGFDEYLREIRSLFATVKIRKPDASRARSREVYIVATGRKL"
     CDS             55526..57478
                     /codon_start=1
                     /product="Cell division protein FtsH (EC 3.4.24.-)"
                     /label=Cell division protein FtsH
                     /db_xref="SEED:fig|6666666.356839.peg.75"
                     /translation="MSDMAKNLILWLVIAVVLMSVFQSFGPSESNGRRVDYSTFLTEVN
                     QDQVREARINGREINVVKKDSSRYTTYIPVNDPKLLDNLLTKSVKVVGEPPEEPSLLAS
                     IFISWFPMLLLIGVWIFFMRQMQGGGGKGAMSFGKSKARMLTEDQIKTTFADVAGCDEA
                     KEEVAELVEYLREPSRFQKLGGKIPKGVLMVGPPGTGKTLLAKAIAGEAKVPFFTISGS
                     DFVEMFVGVGASRVRDMFEQAKKAAPCIIFIDEIDAVGRQRGAGLGGGHDEREQTLNQM
                     LVEMDGFEGNEGIIVIAATNRPDVLDPALLRPGRFDRQVVVGLPDVRGREQILKVHMRR
                     VPLSPDIDASVIARGTPGFSGADLANLVNEAALFAARGNRRVVSMVEFEKAKDKIMMGA
                     ERRSMVMTEAQKESTAYHEAGHAIIGRLVPEHDPVHKVTIIPRGRALGVTFFLPEGDAI
                     SASRQKLESQISTLYGGRLAEEIIYGFEHVSTGASNDIKVATSIARNMVTQWGFSEKLG
                     PLLYAEEEGEVFLGRSVAKAKHMSDETARIIDQEVKALIERNYQRARELLMANMDILHS
                     MKDALMKYETIDAPQIDDLMSRKDVRPPAGWEEPTSGNTPSSSDNGGAPKAPTPADEPH
                     TPTPGNTMSGPLNDK"
     CDS             57560..58417
                     /codon_start=1
                     /product="Dihydropteroate synthase (EC 2.5.1.15)"
                     /EC_number="2.5.1.15"
                     /label=Dihydropteroate synthase
                     /db_xref="SEED:fig|6666666.356839.peg.76"
                     /db_xref="GO:0004156"
                     /translation="MDEFKKQNMKLNARGLTLDLTCPQIMGILNVTPDSFSDGGKHNTL
                     NTALIHAEQMISAGATFIDVGGESTRPGADEVSTNEELERVVPVVEALAQRFETWISVD
                     TSKPEVITASAQAGAHLINDIRALREPGALEAAAATGLPVCLMHMQGLPRTMQHTPHYD
                     DVVGEVSAFFEHHIARCVAAGIPRDQLLLDPGFGFGKNLQHNYRLLGHLEALHRFGLPL
                     LVGMSRKTMIGQLLGVPPLERVHGSVACAVIAAMKGAHIIRVHDVKATVDAIRVVEATL
                     SAKE"
     CDS             58426..59763
                     /codon_start=1
                     /product="Phosphoglucosamine mutase (EC 5.4.2.10)"
                     /EC_number="5.4.2.10"
                     /label=Phosphoglucosamine mutase
                     /db_xref="SEED:fig|6666666.356839.peg.77"
                     /db_xref="GO:0008966"
                     /translation="MSSRKYFGTDGIRGKVGDLPITPDFVLKLGWAAGKVLARHGSRKI
                     IIGKDTRISGYMLESALEAGLAAAGLSASFTGPMPTPAVAYLTRTFRAEAGIVISASHN
                     PYYDNGIKFFSIDGTKLPDEVEEAIEAEMEKTLTCVESAELGKANRIVDAAGRYIEFCK
                     GTFPSELSLSGLKIVVDCANGATYHIAPSVLRELGAQVIAIGCEPDGMNINEQCGATDV
                     TQLQARVLSEKADVGLAFDGDGDRLIMVDHQGNKVDGDQILYIIAREALRQGQLRGGAV
                     GTLMSNMGLELALKQLGVPFARAKVGDRYVLELMQSKGWRLGAENSGHVILLDKTTTGD
                     GVIAGLQVLTAIVRNHMSLHDLCSGMKLFPQILVNVHFSGEGDPLESESVKQATQAVEE
                     QLAGRGRVLLRKSGTEPLIRVMVEGEDEAMVMQMAHRIADAVKAAG"
     CDS             60050..60397
                     /codon_start=1
                     /product="Preprotein translocase subunit SecG (TC 
                     3.A.5.1.1)"
                     /label=Preprotein translocase subunit SecG
                     /db_xref="SEED:fig|6666666.356839.peg.78"
                     /db_xref="GO:0009306"
                     /db_xref="GO:0015450"
                     /db_xref="GO:0016021"
                     /translation="MGTTMYEALLVIFLIVAIGLVGLIMLQQGKGADMGASFGAGASAT
                     LFGSSGSGNFMTRMTALFATLFFVLSLILGNMSSNHSKQGSEWENLNQPAAPEKAEQSK
                     APAAPSSDIPK"
     tRNA            60452..60535
                     /product="tRNA-Leu-GAG"
                     /note="/transl_table=11"
                     /db_xref="SEED:fig|6666666.356839.rna.2"
     tRNA            60598..60671
                     /product="tRNA-Met-CAT"
                     /note="/transl_table=11"
                     /db_xref="SEED:fig|6666666.356839.rna.3"
ORIGIN
        1 atggatacga ctccagcggt tctcatcact ggtgcctcat cggggattgg cgctgtttat
       61 gccgaacgtt ttgcgcatcg cggccatgat ctggtgttgg ttgcccgtga cagtacgcga
      121 atggacgcgc tggctgttcg tctgcatcag gactacggcg tgacggttga tgttctgcct
      181 gcggatctta ctcaacctga cgagctcgcc gtggtggaga cgcgactgcg cgaagacagt
      241 catatcggga tcctcgtgaa taacgcggac atgagtatcg ctgggaactt ccttgaacag
      301 gcgacgaacg atatcgggcg gcttgtcgcg ctcaacacgg tggcgcttgt acggcttgcc
      361 agcgcggttg ctccacggct ggcggcggca ggcgaaggcg ccatcatcaa tattggctca
      421 gtggttggcc tggccccgga attcggggcg accgtttacg gtgcgaccaa ggcgttcgtg
      481 ctgtttctgt ctcagggact cagccttgag ctggctccct gtggtgtcta cgtccaggct
      541 gtgcttcctg cggcgacgcg cacagagagt ggggagcgct caggcaccga catcaatacg
      601 cttcctccag tgatggaagc cgaagaactg gtggatgccg cgctggttgg ttttgatcgc
      661 cgcgaaccgg taaccatccc gccgctccac gaattcgggc aatgggaggc ctatcaacac
      721 gcccggcaag ctatgctgcc ggggtttgcg caggcgaata ccgacgcgcg ttatcgactg
      781 atgcattcgc cgatactgaa ttgcgtccgc agcgcgccgg ttttatttac tcaggcaaca
      841 gacagcctga tggtgaacca atagacttga tggtgaatta atagacttga tggtgaacca
      901 atagaccaga tatttaatga catcaaataa actcatcgca ctgattaccg tcgcctcatc
      961 gaggatcgat gaagcgacag tggaactgct ggtaccggcc ggcgattaag gtagttcggc
     1021 gtagttatca tcagtgccag aatatgttgt gtggttactg ttttacgagc atgacgcata
     1081 ttgatgaatc attaaacgaa acgcgaccgg ctccaggtgc gcatgttccg gcctgtgctt
     1141 ttccgcgtag tcatcggggg gagagtcagc tcgatttggt tttgtagaat ctgtattact
     1201 gatcggatgg agtttcagaa gcccgcgaaa gcgggttttt tgttgttcga gctttacggt
     1261 aataaagtaa agtgctgcga cactcggcaa tagatacaaa aaagccaccg ttgagaggtg
     1321 gcttaattat atgattttaa atctaaaatt tggtgacccc tgttgggttt gaaccaacga
     1381 ccaagcgatt atgagtcata aaattggcat gtttttaatt gttcgctatt gtctctgttt
     1441 gtatttttaa ttgtctacaa tcaattggtt atgaagttat ttttgtttct gattggttct
     1501 ctcatttccc cattgtacta tccttacctg acccattacc tgacccatta cctgacccaa
     1561 aatgggcatt gggtcaggta acgtttatcc tcagaaaggt aacctcatgg ccgctaatct
     1621 taccgagact gctatacgtg gattgaagac aaaaagtacg tcgtactacg tgtggagcaa
     1681 cagtgctcaa cgtggcaccg gcaggcttgg cgttaaggtt cagccgtcag gcagcaaagt
     1741 ctggtcatcg ctgatgtatc gaaaaacaag cgtgagcacc tgatcccgct gactgaatcg
     1801 gcattacggg aattaacctc agtgaaagag ctgactaagg aaagtaacag tctctatatt
     1861 ttcccgctat cgaccaacgg tgagagaccg gtacgcactg atagcctggc gcgttccatc
     1921 atgcatttcc gtgcttttaa tcctgagttt aaagttttca ctgcgcgaga tttacgccgg
     1981 acctgtaaaa cgctgatggg ggaggcgggg atcagtaaag agatccgtga ccgtattcag
     2041 aatcacgctt taaatgacgt cagctcgaaa cactatgacc gctatgatta tctgactgaa
     2101 aagcgcaggg cgcttgagat ctgggaagat cgggttaata actatcaacg gcagcaggaa
     2161 aacaacgttg ttaacttgtt tgggcggagg tgagagcttg gcgaaatatg agcttaattc
     2221 agcagaagag cggtatcagc cgggctctgg agacctggtg ctggctaata agctgggaat
     2281 cattgatgaa caggaaatgg aggcgctgga gtctggcttg ctgctgatgc tgtatgagca
     2341 gctatttatt gagggccagc cgcctgagat gctggctttt gagcacatca gcaggtggca
     2401 tcgccaatgg ctggggaatg tgtatgactg ggcggggagg ctgcgtaatg ccaacctgac
     2461 taaagatggc ttccagtttg ctgccgcaga caggattccg cttcttcttg atggtttcga
     2521 gaagcagttt ctcgctcggt ctggcgagct taaatctctg gcacgttcgg agctggtcaa
     2581 ttatctggct gaatgccacg tggagtttat tttgatccat ccattcagag aaggtaacgg
     2641 gcgtctgtcg cgactgcttt gcgatgtgct gtcggttctg tcagggaagg gcttactgga
     2701 ttacagctta tgggatgaac acaaggcgtt ttacttcaag gcaatacagg caggcgtatc
     2761 agggaactac agtcctatga tgcagctggt gagcgatatc ttgccagatt agcgggcgag
     2821 gccaacggct ttcgcctgtg cctgattttt tttgagttgc tgctcaattt tttgcacaga
     2881 aacgccggtt tcgatcgcag ttgagctggc aacggcgcgg tagatttgag ttttagtgat
     2941 ctgagtatgc gctgtttttt ttgtcatgtt taaagcctca ttttgttgca ctgattctag
     3001 tgtggatagg gatagcccgc aaggctggta tcacttggga tagcacggtg aatgcctgca
     3061 tcgttcacag agtagcgctg tacatctctc gatttgagat gatgataatg tagtccctcc
     3121 ggtttttagt accaccggca atgaggatct ccggccagtt ttttccgcgc atagataaca
     3181 ggtggcatat cacccagtga gctatgtggg cgttcctcgt tatattctgt gcgccagtct
     3241 tctgtgagtt cgcgcacttc agacaatgtt ctgaacagat acatatcgag tatttctgtt
     3301 cgtagcgttt tgttaaatcg ctcgataaat ccgttctgca tcggctttcc gggctgaata
     3361 aaatcgagta tcacaccgtg gcgttctgcc cattcggcta aggcggcggc ggtgagctct
     3421 ggcccgttat cacttcgtat aaaagccggg tagcctcgtt ctgcgcttaa tcgttccaga
     3481 atgcgcacaa cacgatgagc cggtatattc aaatcaactt cgatggccag cgcttcccga
     3541 ttaaagtcat caacgacgtt aaataacctg aatcgccgcc cgtcgatcaa ggcatcactc
     3601 ataaaatcaa ctgaccaaca gtggttcatt ttatgcggaa taaccaacgg ctgtggatgc
     3661 ctgttaggta agcattcttt ccctttgcgc cgaaggttga gttttaacaa tcgatagatc
     3721 cggtaaaccc gctttgcatt ccacagtaac cctgcctgtc gtaacttact gaacataagt
     3781 ccaaaaccat aggccggata ctgatgcgcc agtttttgta gcgcctcgac tacaggcaga
     3841 tcccgtgccg tgttcgggca ataatgcaac agacttcgat tgataccgat aatccggcac
     3901 ccgcgtcgtt cactggcctg atgttccttc ataacgtaac gcaccagctc acgcttctca
     3961 ggcaccgtta aagttttttt gaaacaacat ccttaagaat ttcatgatct aagctcaggg
     4021 atgcgtacat ttgctttaat cggcgattct cttcttccag ctctttcatt cgcttaatat
     4081 cggaggacac catgccacca tatttggctt tccagttgta atagctggct tccgacacac
     4141 cgttttcgcg gcagacatcc ttcacatgcc gaccaccttc aacctctttc aaaacccgca
     4201 ggatctgagt ttcagtgaaa cgcactttct tcatgatgag cctccgttgg ttgtatttta
     4261 accagagagc tccattacgc ggtaagacta aattcacggg ggactacaaa atcggtttga
     4321 ctcaaaaaac agtgcgacac ttttgagaca ctcaccagta gatacaaaaa agccacccgc
     4381 tagtaggtgg cttaattata tgattttaaa gctaaaattt ggtggcccct gttgggtttg
     4441 aaccaacgac caagcgatta tgagttccta caatgattat gcgaaatcaa taatttacat
     4501 tatttatcaa tgatatagat tgccattatt tgccagtgtt agccgtcatt cgccttttct
     4561 gtcgccactt tatcgccact agtggctagt gggttgagct taaccgcctg ctctaggtgg
     4621 tcaggtgcaa agtgcgcgta tttcattgtc atttttatat ctgtatgtcc cagcacgcgc
     4681 tgaagaacca gtatgtttcc accattcatc atgaaatgtg cgccgaatgt atggcgtaat
     4741 acatgagata gctgcccggc gggtaattct atgcctgttc gtttaattgc agagcggaat
     4801 gccccataac aatcactgaa taaccgccct tttttatcga cggggagcaa atcaaaaatt
     4861 tctttgctaa caggaacggt gcggtttttt cttccctttg tttttgtgta cgtgattttg
     4921 cattttgcag cctgagttcc ttttaatttt tcggcctctg accacctcgc tccggttgcc
     4981 agacatattc ttactacggt ttccaggtcg gggtgatcat gccgtttgca ttccgaaagc
     5041 agcagtgcga tctggtcctg atttagccat gccatttcca tttcttcggt gcgaaatggg
     5101 cgcatgtttt ttagaggatt ttcgcctttc cattcaccga gtctacttag ctcgttaaac
     5161 gttgcccgga agtaaattag ttctaaattt agtgtgcgag gagatacttc tcggactctg
     5221 tttgatcgtg cgtattcacc tcttaacctc ccctctctgt agcgcgaaaa catttgcgca
     5281 tcgaagtcgc gtgcgagtgg ttcgcccata cattcaaatg cgtgatgcat agcgccttgg
     5341 cgtttgagtc catcgcgtag cgttatgccg tgcgcgctat accatgaatc aaccagctct
     5401 tttagcgtgc gttggtcttc tttctcttca ttccacgggt tttgtacggt gtactgctcg
     5461 aacgccagcg cttcgccttt tgtagcgaac tttttacgaa tgcgctttcc tttcgcgccg
     5521 ttcgggtaca actcgcatat ccagccgcca tcaggatttt tgcgtaccgc catcagttaa
     5581 cctcgctgta tacgccaaca acgcgcccca gcgttttaat ctcgtcaact ccgcattcaa
     5641 acggcacttt gccgcctgca acatgcaatc gctttgccgg gagaacggtc agatcgcgga
     5701 tactgatagc cccttcaata tctaccagcc atgaaccatc agacaagggg tgggttcggt
     5761 caatgaagta tgtatgcccg tcgtactcta atgacatggg cgcggtgatc ttttttctga
     5821 aaatgaatgg tgaaaccgaa aggggttcca tttcggaaag tctgccttcg actatcgtga
     5881 agtgagggat gctaattgtg ttcttcgatg ggtctatgat cgggtcacct gaaaactttg
     5941 gtccttcacc tgttatcagc cagtgaatac ttgcgccggt ttccagtgcg caataaacgg
     6001 caaagtcata ggaaattggg ccgcgcctgt agcgattcga tagggagctt gccgcgatgt
     6061 tgtaatggtt tgccaactgg actttttggg aaaacccgta ggtttcacag attcgatcaa
     6121 gaatttccac gttgttttgt tctgataaat ctatcttcat tttggtatat ccagttgact
     6181 gcaaccagaa atggttgtag cttttcataa atcgaattca ttgatggcgt aagttggcaa
     6241 acggtggcaa tcaatgggta tttattaaca aacttaggat aatgccttat ggcttctgaa
     6301 atcgcaataa ttaggctccc tgcgcctgtt gtgactcttc agcagttcgc cgaacttgag
     6361 ggtgtttcag agcgcactgc ttaccgttgg acgactggcg ataacccccg cgtacctatc
     6421 gaacctcgta agatcaacaa gggctgtaaa aaagctggtg gcccgattcg tatctactac
     6481 gcgcgctaca aagaagcgca gatgcgtgag gctttggggc attctcgttt tcaaatcgtg
     6541 tttgataatt cactttatgg gaatcacaga ggcgtaggcc atgtttgatt atcaagtgga
     6601 taaacaaccg catttcaatg acgcctgccg ccagttcgcc cagcgtcaca acctcgaagc
     6661 ggtcgcggcg gcggttggta tgcgcccgca gatgctgcgc aacaagctga acccagacca
     6721 gccgcaccgg ctgacctgtg acgaactttg gcacattacc gatgttaccg aagaccccac
     6781 gctgattgat ggcctgctgg cgcagatgaa gtgcatgccg gccgtaccgg tgaacgaagc
     6841 caagccggaa cggctgacga catacgtttt agaagccgcc gccgccgtcg gcgctgttgc
     6901 tgctcgcagc gtgtcaactg agcgcctgac gcagaccggg aggcacgatt tcatcggtag
     6961 cgtgaattcc ggtattcgat ttttgtcact cgtcgggctg tctatccagg cccgcataca
     7021 gcaaaacccc acgatttccg ccactgttga cgttatcagc ggcatcggcg cgggtttgag
     7081 ctgaaagaat aaaaacaaca tcagctcaaa cccgcgccgg gcgtgtcgaa acatcccggc
     7141 acattgaggc tttattgctt cttcttttcg aaggtgcagc aacaaaccct taaacaacat
     7201 gaggatgtaa ccgatgggat tctttggctt tggtaagaaa gtggcggccg caaaggttga
     7261 gctgaaaaag gtcgaaaacc gcgacctgat ggaggcgatt atcggcggct gcctgctggt
     7321 cgctgccgca gatggcgaga tcgagaagga agaaaccgac aagctggatc agctgctgcg
     7381 ctcgaatccg cagttgtcgc acttcggcaa tgagattacc caggtgattg gccgctttac
     7441 agagcagttg caggcggggt ttcgtgtcgg ccgcctgaac atcctgcgcg agctggatga
     7501 cgtgaagaac acggcgaaag acgccgagga ggtttttgtg aacatgctga ccatcgcaga
     7561 agccgacggc gagatcgagc cggcagaaca gaaggtgttg gaagaggttg gccgccgtct
     7621 gggtctgcgt attgaagatt atctgtgatg gatggtctga ccaataaatt acggctggcc
     7681 gccgcaatgg ttctggcgtt tatggccgtg gcggtggatt tctccagtta cctgctttct
     7741 gttgccagtg atgcgttttt tatcggtgcg atggtcgcgg taatttgggc gccgctgacc
     7801 aagaaagcct aataatcggc cgggatgccc ggccccattc gcaagcgccc agcggggcgt
     7861 ttactaatgg gggaacgatg aaacagccaa tatctattgc tccttttttg tggtgtcacc
     7921 agacagagaa aataagttct gtggagatcc gtcatggtaa gggcgtacag ggcatcatta
     7981 ttcggccgga tggccgccgc tggaacccgc cgaaaggggc gtttaatcgg taatcaggag
     8041 ggaacatgtc tcaatctgtc gatcatcaga aatggataca gcgttgcagg gatatcgtgt
     8101 ttaaaggtga atcccgcgct cagtcatttt gggagcgtgc tgcactggaa acgcgtgaga
     8161 ttatcctttt ttccgcaaag ccaaagctga aatcacgcca tgtcaattac tcatggcatc
     8221 agtttacggc ggaagagcgt gcagctatct ggagtgccat taagcgcatc cgtgctattt
     8281 gcgatgaaac cgcgctattt ggcccggatg attttctgaa aaccagtaat caaaacggca
     8341 ccccgaatca gccgaacccg tcacccattc attaattaac ccatagcaac gaataaatgc
     8401 cctttatcgg gcagggattc gtattacctg aaaaaaggaa aacgtaatga aaaatgccga
     8461 agtaaagacc atgaccgtcg ctgctgatgg cgcactgatc gaactgctga ataaagccag
     8521 actggaggag cgcaaagacc agcatttgtc cttctcactg cgtcttgctg cgctggctat
     8581 ccgcgcccag caaagagatc tctctgccgc tgaactggtg gaactgatgc gccaggagtc
     8641 agaacgtttt gagcactccg ctcaggggtt gagctgatgg actccatgga tatggctcag
     8701 gaacgcgaag cgttcatccg tgaaacacaa atccaacagg cccggcaaca gtcgggttgt
     8761 gccgtttctg cattcgtctg tgaaagctgt gacgccccta tcccggaagc ccgccgcgtg
     8821 gccgttccgg gtgtgcgtct atgcgtgtac tgccagggcg atgctgaatt gaaaaacaaa
     8881 cactatcggg gtgccttatg agcattatcg ccacaccgct gaaatgggtc ggcagcaagg
     8941 cccgcgtgat ggatatcctg cgtgagcatt taccggctgg tgatcgtctg gttgagccgt
     9001 tcgccgggtc ttgtgcggtc atgatgaata ccgattaccc ggaatacctg atcgccgata
     9061 tcaaccccga cctgattaac ctgtatcagg tcatcaaaga ggatttgaag gatttcattg
     9121 ataccgccga aggtctgttt cgcactgcga atacagcaga aagttattac cgcttccggc
     9181 aggtatttaa ccgcagcaaa gaaaatcgca ccacctcagc ggcactgttt ctttatctga
     9241 accggcacgg ttaccggggc gtttgtcgct ataaccgcgc cggtgggttt aacgttcctt
     9301 acgggcatta tgcatcgcct tattttccac tggccgagat tcaggcattt gccgaaaaag
     9361 cccgccgtgc aaaattcatc tgtgctgcgt ttggcgaaac attgcaactg atccgctccg
     9421 gcgatgtggt gtactgcgat ccgccataca tcccgcaaac gccaacggcc agcttcacca
     9481 gttatcacac cgatggtttt acccacaacg atcagtatga cttgtgcagc gcgttatcac
     9541 gcctggccga gcgcgggatc cctgtcatcg cctcaaacag cgacactcac cacgcacaca
     9601 gcctttacca caggtttgat atctgccgtt tcactgcgcc gcgtagcgtc ggcgttgcgg
     9661 ctggggaaag caaacaggcc ggggaaatca tcgccaagcg tctgccggtg catgggcagc
     9721 gaggtgcagc ataatgaggg ctatcgatct cttcgctgga tttggcggct catcaaccgg
     9781 cgcacgtatg gcgggagtgc atgtggtatg ggctgctaat cactggcccg ctgccgttga
     9841 atatcatcgt ttaaaccatc ctgatgcaat ccacgtttgt caggacttgc atcaggctga
     9901 ctggagttct gtcccggcac atgacctgat gatggcttcc ccttgctgtc agggacatag
     9961 ccgggcacgt ggaaaagcag caggtaatcc gcagcacgat gcgagtcgct cgacagcatg
    10021 ggctgttgtg tctgccgccg aatatcacaa gccctcagcg gtgattgttg agaatgtgcc
    10081 tgaatttcta aactgggcgt tatatccggc atgggcggca gcaatggcag cgttgggtta
    10141 tgcattatcg ccacatattg ttgattgtgc cgatctgggg gttcctcaga atcgggtccg
    10201 cttatttctg atctgcactc gtagtcgttc cccgctatta ctcgatctgc cacgcatcgg
    10261 ccatgttcct gccgcctcgt tcattgattt tgaaggtggt aaatggtcac cagtaaatcg
    10321 tccgggtcgt gcgatatcaa cgcttgagcg tatcgaaaat gggcgtcagc aattcggcga
    10381 tcgattcgtt tttagttact acggcaatac aaaaacaggc cgcagcctga gccgacccat
    10441 cggaacaatc acaaccagag acagatgggc catcgtggat ggtgaccgta tgcggatgat
    10501 gacaaagcgg gaggtactgg ccgcaatgtc tttttcgtca tcgtatatca cgccagacag
    10561 tcaccgcctg accgtcaata tggcgggtaa tgctgtgcca cccgttgcca tgtgccgggt
    10621 tgttggggcc atagggggtt gtctgtgagc attctgcaac tcgcggtgat gggggaatat
    10681 ttcgccgcaa tgaaggctgg gctaaagccc tttgagtacc ggttggacaa tgcttactgg
    10741 cgacgtcggc tcattggtcg ggattatgag caactggtga ttacatgggg ctatccggcc
    10801 cgttctgata tgtcacggcg tctgatcctg ccttggcttg gctatgaaat gcagacgatt
    10861 acacatccgc attttggcga taaaccggta aacgtgtttg ccatacggat aagtgacggg
    10921 gtttgtgagt gactgattta cagatcctgg aacataacgg cgcgtatcac gctgtcaggg
    10981 aatggcagcg tgagcagttc tcccccggtg aacccgccgg gctgagtttc gttgagcgta
    11041 gtctatggca cctgaataaa attgatcatg attggcgtca gcagtacctg gccggaatgc
    11101 cggattatct ggcgaagtat ttcggccaac gttatgaaaa actgtttaaa tccgatgagc
    11161 acaagggccg ccgccgggcc aatacgtttt tactccgcac cgtggggaaa agcgtattgc
    11221 cacgcctgcg caccgttacc gaacgatacc agacgcaaca gcgtgcggcg ggagatctgc
    11281 cgttcccatt ctacgatgat ctggaaaagc tgccggttta tgaccgtgac aacatccgcg
    11341 ccctgtcaca gcaggtggcc gactttatgg ccgcatcgtt gcgcgactac accgaaaacc
    11401 gcatcaggaa caccggggaa ctaactgaca ggtacatcac cctgctgtca ttccgtcacc
    11461 ttggcctact gaccttacag gccggaacgc agccgcccta ctgggcgcaa ttcaccaaaa
    11521 gccgccaccc gttatccact gaaaaagctg aatccggctt gctacgcatg atgtcaccag
    11581 agtggtggcg ggcgcgtcta aagcgccgtc gtgatatcca gcgggagcat atggctatcg
    11641 cggtcggcca ggtgcaaaag gcggcgtcgc cgtatgtctc gcgctccacg ctggatgaat
    11701 ggaaagagca gaaacggcgt aaccgagagt ttttcaaggc gtttgaactg gaggacgaag
    11761 agggaaaccg cgtctctctg gacgacaaag ttaatgccag caacgccaac ccggcaatcc
    11821 gccgttgtga gctgatggtg agaatgcgcg gttttgagga tttggcgcag gaaatgggct
    11881 gcgccgggga gttttatacc atcaccgcac cgtcacggta tcacgctgta cacagcggtg
    11941 gcgggtttgt tgaacagtgg agtggtgcca gccctcgcga cacacagaaa tatctgtgcg
    12001 gtgtgtgggc gcgtatccgg gcggaactgt cacgcgaaga gattagcgtg tttggtttcc
    12061 gggtcgtcga gccacatcat gacggcacgc cgcactggca tttattgcta ttcatgcgcc
    12121 ctgagcacat cgaacaggtg cgcgacatca tggcgtatca cgcccgccgg gaagatgccg
    12181 atgagctgaa cagcgaaaag gcgcaaaaag cccgcttcca ctatgagccg attgacccgg
    12241 aaaaaggcag cgccacgggt tatatcgcca agtacatcag caagaatatt gatggctacg
    12301 cactggatgg cgaggccgat gaggaaaccg gggaaaacct gcgcgacatg gcaaaagcgg
    12361 tatcagcctg ggcatcacgc tggcgtatcc ggcagtttca gcaaatcggc ggcgcaccag
    12421 tgacggttta ccgcgagttg cgccgcctgg gtgataagca actggataac gcggcgatgg
    12481 atgcggtact ggcggcggca gacgtgggcg actgggcggc atacacacag gcacagggcg
    12541 ggccgttagt ctcgcgtgat gcgttggtgg tgcgcctgtc ctatgaagtg accgagcgtg
    12601 ccaaccagta cgccgaagat gtgcaaaagg ttcagggggt gtactcgccg ttactggggg
    12661 cgcactccgc aattatcacc cgcacggtgg agtggaagat tgtcccgaaa caggccgccg
    12721 cgtcagcggg ggccggggtt tctggcggcc ccgccgccgc ttggagttct gtcaataact
    12781 gtacgccggg tttacggcga cgattatcgg aattgttgcg cttaagaggt tttccgcctg
    12841 atccggtgct ggtcgatgtg ctgatccgtg gcggcaatct ggcaatgagt gagggcaggg
    12901 cgctgaaaat ggttaacggc aggctggagg aagtacggaa gacgggagat tgcgagctgt
    12961 ggacggggtg gaactgggaa tcataggcgg taatgactgt atttgccggt gtgctggatg
    13021 cgtatttgta gtccggatcc ttgcaacaca gacggtgtta tctgtgttgg ccataactgc
    13081 gctgcagtac agacggcgat atctatgtgg taccacaagg gggagttatg ggctatctgg
    13141 ggagtaaggc cgcgtcgggt gcatatcaga aaattatcgc agcgatgccg ccgcatgaca
    13201 catatataga gactcatctg gggagcggcg cggtgatggt gaggaagcca gcagcggtgc
    13261 ggagcgtcgg aatagatatc gacggtgagg cgttgagaca tttttctatc gggcattcta
    13321 tcggggcggg cgggttgcaa cacgttactc tgatcgatgc tgacgcggtg gagtacctgc
    13381 gcgagtttga ttttgctagc gcaggtcagg tgttgatcta tgccgatccg ccatatctgc
    13441 cggaaacacg taccagccgc gcgcgctacc ggtttgagta tacagttgaa cagcataggg
    13501 agctgattgc agtgctgcgc agtgtgccgg ccagcgtcat gatctccggc tatccgtccg
    13561 cgctgtacga tgagttactg ggggattggc ggtcaatcac gtttcaagtg atgacgcgcg
    13621 gaggggtgcg cacggaacag ctgtgggtga attacccgga gggagcggcg tacgatgcca
    13681 catttgcagg tgagaactac gttgatcggc agcgtattaa gcggaaggcg cagcgctggg
    13741 ctgataatta ccgggcgatg tctcggccgg aacggctggc gatcatgtcg gcgcttcagg
    13801 gtgtcgatgc atcggattgt taagcatttt tttagttatt ttttgtcatc ttttcgcgtg
    13861 attcgtaatc acagataaaa acactatttc aattatgtaa tatttggaat tgaaatttat
    13921 gcttagtaat tattatactg tacctatata cagttgtaca gtgaggtgcg atgtgttagg
    13981 aagtatggaa gtatctgttt ttgttgagcg tgttggattg ttagcaaaac tgactgagca
    14041 tggcggtgct gatgaacatg ataaagatgt ggcgctggca tggattaatg aaatggttaa
    14101 tgaatttgtt tcgcgcgagg taaatggttt cgaaagggaa tgattagata aaaaataatt
    14161 aacatattaa gaaacccgct gtaagcgggt ttctacttta cgtgatgagt gtaagaaatg
    14221 tttgacgtgg atccgtgaca tggttgcgga gtttgctgat cgcgatggat gttgtgcagt
    14281 tggccatcaa tttgataatt caggctgcta taacacataa ttagataaca aggttgaaca
    14341 atgagccttg cgaggcgtta gaaattgtct ttgttagtgc ctacttctca taagaggcac
    14401 tacatatgct aaatgcaacg cgttaaggca gaaacatctt gcgcgattag gggcaatgaa
    14461 cttaagttaa gtaacgcaac caacagttaa aaaggttgtc ttagttataa ggaatttgct
    14521 gttgtggttg ctggtgacga agtgtacaat tccgcgccgt ataaaaagga gggggttatg
    14581 tcaagtatcg ccgcattgag gctgggtaat ccagttgaac gtttggcacg ggttctaaaa
    14641 gagaatcagg acaaactcaa tctgagtaaa gatggttttg tgtccgtaga tttgtccaac
    14701 gaagaagctt tgaaagccat cagagatcag atggataagc ttgaaggcat caaaacgagc
    14761 accgttaaag caaaacatta ttacagaacc cgataatggc aacattactt ttagcagtga
    14821 ttttggttag cggtttttta tatgtaaacc tatcactttc aacacgatac agatataagc
    14881 gttccaacgg ttgggacgct tatttttttg tggctgcatg gggaatcgtg tttttccttg
    14941 ctggcggctt tcttaccttc gctcttaaca tcagcggtgg gtttcgctgg ctctctaatg
    15001 cgctgaacct aacgcccgac agctttaacg ggatgttatc cgccacaacc gatagatcac
    15061 agcgtatcaa tgaaattaag cagattgcat gggttgtgat ttcaatagta ctggcggccc
    15121 tgttcggttg gcttaacaaa cagcgtactt caaaaggtga tcgccgttgg gatgcactgg
    15181 caaaggccgt ggggaacaat gcttttgagt cactgctcat ggaagcatcg gcgcgtcagt
    15241 tccctatcat tgctacactt tcatcacgca aaatctatgt aggtctggtg acttgccctg
    15301 cgctggaaaa tgggttgtcg gaacaccttg aaatactccc catgctgagc ggctatcgtg
    15361 ataaagatga cctcacgata agtatcacga ctaactacca tcagcactat cttgaaagtg
    15421 gcatcattgg tggaatgtct cgtctgaata ttcaggattt ccgcgtgctg attccaaaag
    15481 atgaagttga aactatctcg ttctttgaca ctgaaacgta caacaaattt aaagaagatg
    15541 aagcgcgaga cagaaaaaac tgccgcaatc tgggtggcaa aaagccatca acccgcaggc
    15601 gaaggactac tgacgatgcg gaacaggata gtgcatgact acgccgcatg agatcgcatg
    15661 atcgtttgag gatcgttttt gctgaggccc gccagaactg gcgggctttt gcttatgttc
    15721 atgcaggtgc atgaaaacca ctacgcaaag cgggcaggcg cggcggggcc tcgattgcgc
    15781 gcgctggggt ggtatttggg gtttcggtcg cagatctgcg ggtgaggagg ggcagggcgg
    15841 gggcaaaaaa aaccgcctgg cggcggtcgg gtctgggggc tgggtggtgc ggttacttgc
    15901 tgatggacac agagaggttg ccgtcttcaa cgtcgagctg gtacgagtca aagcgaatca
    15961 cttctattcc cgcccattcg tttaacgcca ggatctggcg ttgcagtggc atcagttcat
    16021 tgcgtacaaa aactttactg gctttgccga cgtccccaaa cccccctaca ttattcggga
    16081 tgatgcccat catctgcggc ggtatgcggt gtgcggccag catgtcatcg cggctgacgt
    16141 tcttgatatt cagaaactcg tctttggccg ccacttcgga caccgggatc accttcaccg
    16201 aatccggctt gccgttcggt gagtacagaa acaggttacg gaagttgccc ggccctttgg
    16261 cgcttttcat ggcctggcgg atgttgttca cgtcttcctg attctgctgg ccgtcgctca
    16321 tatacagaat aaaaccggcg tgactgccgt tcaggtaata cttacggcgg aacaacgtgg
    16381 cggactcgtt aagtagtgcc gacggaatgg cggacaggta ttccggcagg ccgtagattt
    16441 cctgccccaa atcaggctcc atcaaatgaa acacgctgcc cggctcaaac gcatacggct
    16501 ggctgttgta gccgtagcgt gcaaaccagt aggtgtctaa atccagcccg cgccgggtgt
    16561 atttcgccaa tgtcggttgc agcgacaaca ggccgccaag gcggttggtt cgcatctcca
    16621 gatacgcatt gccgaacacc aggtaatcct gcacaaaccg gctgaatgcc tgctggctta
    16681 acagcgggtg agggataaag gtgctggtca ggatgttacg cttcacgaaa atcggtgagc
    16741 tgtggtgtac cgccgcccgg aacgtccggg ccagaccctc gaagcttacc ggcggttcat
    16801 accagcgatc ggtgcgcacg cattcgatat agtccagcaa ctcgcgccgg tcgagcaccg
    16861 ggatcgggtc accaaaggaa aaggcttcca cgcctgccgg gccagtcggg gcggcggcca
    16921 gcgtagcggg tggttgcggt ttgcggcgtt tcgccattag aaaatctcca cgatgttatg
    16981 gctgttggca ttctcgcctt ccagcggttc attaaacagg gcgtgcatgg tggcccaggc
    17041 caggtcggca tggctggctt cctcgctacg gctcgcctca tacgttggac ggctaccgct
    17101 ggcggtcatg gccttgcgga tggacataaa ggattgggcg atatcggtgt ggccggcgtc
    17161 gaattccagc cggcgatggc tgatcacgtc ataggctttc aaaaccaagg cgtttttgac
    17221 gtttgggttg tagacgaatt cccgcgccgc cgggaaaaac tgtttcacat tctgatagac
    17281 gccgtggccg acgccggtcg agtcgatacc gatatacgtc acattgtact gttcggtcag
    17341 ctttctgatg gcttccgcct gggcgcggaa gtccatccct cgccactggt ggcgctccag
    17401 aatacggaac ttaccgccca gcgcctgcgg cggagccaac accacacaac cggcgctgtc
    17461 gccgttctgg gttcccttgg ccgggtcgta accaatccat accgggtaac gcccgaatgg
    17521 ccggagcagc agcggctgga agtcgtccca cacttcccaa ctgtcaacca tacacgcctg
    17581 catatccgag agcgggaaca cggacgccag gtcgtcgata aaatcgcaca tcagcaggtt
    17641 ttgatagtcg gccgggctgt agcgcaggcg caactgatcc aggtcgaaca ggttacagcc
    17701 gccgcgcaca gcgtcttcta ccgtgactat ctggcggtat tgcccgtccg gacacagtac
    17761 gccaggggac aggtgggcgt gcgtcaggtc aatgtcgata cggtcggcct tggcgcggcc
    17821 ccggttaaac agggtgccag accagaacgg ataggcgctg tgggtcaggc tggacggcgt
    17881 ggaaaaatag gtctgccgcc actgcttgtg taacgccatc cccgacgcca ccttttgcag
    17941 ttcctgaaac ttggggatcc agaaatattc gtcaagatac aggttgccgt gatagctctg
    18001 ggcggtgcgg gcgttggtgc cgagaaaata caacgtggtg ccgttgggca gcgtcatcgg
    18061 gtcgcctttc agttcgacgt caacctcgcg cgcaaactca atgatgtatt gcttgaatac
    18121 gtgcgcctgc gctttgctgg ctgacagaaa gatctggttg cggccggtgg tcagcgcatc
    18181 gatcagcgcc tcgcgggcga aaaagtaggt ggcgccgatt tggcgggatt tcagcaggtt
    18241 gcgaacggtg tatttattgc cggcttccca ccagtgccgc tgatagtcga acatgccacg
    18301 atggaacaca tcgaccagtt tctctatctg atcgtcggtg aagacgttct tttccggcgg
    18361 cttgcgcggg ctgttgttgc ggttcgcaac cttcggattt agatcggcct cgttgccgcc
    18421 gttattgaat ttaccgatgc gggcgtgtcg ttcggcctgc cgggccagca ggtcgatttc
    18481 cttaaagtct ttcccttcct tgaccggctt catgacgagc tggcaatagc gcgccgcggt
    18541 ggtgagctgc atctgatcaa gcgggccgta atctccccac ttgtcgcgct tcttccaact
    18601 gtgaacggtt gcgggtttct ctcccagcat ttcggcaatg cgggcgatac gtaatccctg
    18661 aaaccataaa aacatcgcct gacggcgggg atcgaggtcg gtgtgttgcg ctgtcgtttc
    18721 catgtccgca agactacggc ctgacccgcc cgccgtgccg ctcctgccca ttgtgccgtc
    18781 tggcgcacaa tgcccccgcg ttgtctcggt ccctgctgac gccgcaccct aaaggctctg
    18841 attgtcctga tgaactggag cctgaacaat ggcagcgaaa gcaaacgcac gtcgattccg
    18901 gatcggcgtg gaaggggcca ccactgacgg ccgcacgatt gagcgtgcct ggctggagca
    18961 gatggccgcc aactatgacc cggcggtcta taccgcgctg atcaacatgg agcacatcaa
    19021 gggctatacc ccggacagcc catttcgccg ttacggcaaa attgaggcgc tggaaaccga
    19081 agagattcag gacggcctgc tgagcggtaa gctggcgctg tatgcctacc tcgccccgac
    19141 cgatgacctg atcgccctga cccagaaatg gcaaaaaatt ttcacgtcga tggaggtcaa
    19201 cccagatttt gccgacacag gcgccgcgta tctggtcggt ctggcggtta ccgatgaccc
    19261 ggcgagcctg ggtactgaaa tgctcacctt tagcgccggc gccaagcata acccgctggc
    19321 cgcccgcaaa caggcgccgg gcaacctgtt taccgccgct gaagaaacct cgctggtatt
    19381 tgaactcgat gacaacaagc cgtctctatt cggccgtatc tcagcgctgt tcgccaaaaa
    19441 acagacctcg gacgatgcgc gattcggtga tgtgcatcag gcggtagagc tggtggcaca
    19501 agagcaacag cagcttgccg ggcaggtaca gcagcacggc gcacaactgg cccggctgtc
    19561 gacgctggaa accgacctgc aggcgcaaaa aaccgagctg gcgagcctga aagagacgtt
    19621 aggcaagcag gaccgcaacc cagcatttcg tccgctgtcc acaggcggcg cagatatcgc
    19681 gaccgttctc accgattgct aaggaatttc caccccatga agaaagacac ccgctttaaa
    19741 tataacgcct acctgacgca gcttgccgcc ttgaacaacg ttccggtgga agatgtcggc
    19801 accaagttca ccgttgaacc gtccgtcagc cagacgctgg aagacaagat ccaggagtcg
    19861 tccgcgttcc tgaccctaat taacatcgtg ccggtggatg agcagtccgg cgaagtgctg
    19921 gggttgggta tcggccagac cgtagccggg acgaccgaca cgacccagaa agagcgcgaa
    19981 ccgaccgacc cgacgtatat cgacggcagc ggctacaaat gcacccagac caatttcgac
    20041 accgccttgc cgtacagcaa gatcgacctg tgggccaagt ttcaggattt ccagacccgc
    20101 attcgcaacg cgattgtgca gcgtcaggcg ctggaccgca tcatgatcgg ctggaacggc
    20161 gtgcaacgtg agaaaaactc taatcgcgtg aaatacccgc tgcttcagga cgtcaacatc
    20221 ggctggctgg aaaaaatccg tcaggaagcc ccggcgcacg tcatcggcaa tatcgtggat
    20281 gacaacggcc aggagatttc caggaaaatc cgggtcggca aggggggcga ctttgacaac
    20341 ctcgacgcgc tggtgatggc ggcagtgaat gaaaaaatcg ccgtgcagta tcaggacgac
    20401 accgagctgg tagtcatttg cggccgtcaa ttgctggctg acaagtattt cccgctggtg
    20461 aacaaagagc aggacaacag cgagaagctg gctgcagacc tgatcatcgg tcagaagcgc
    20521 atgggcggct tgcaagcggt gcgcgtaccg ttcttcccgg ccaatgcact gctggtaacg
    20581 cgactggaca acctctctat ctactggcag gacggcaccc gccgccgcgc ggtcattgat
    20641 aacccgaaac gcgaccgcgt ggaagatttc gagtcggtca atgaggccta tgtggttgaa
    20701 gactacgact gcacctgtct gattgaaaac atcacgctgg gtgagtttgc cgcgagtgcc
    20761 gccgcccagg tggctgagaa cggcggtact ccggctactc ccgatgaccc caacgctggg
    20821 gcgtgacgat ggcgctaaac ccgttccagc gtcacacccg gtttattcag ggacaacagg
    20881 ccgcccactc gggcggcacg gcgcggccgc tatccggcta tgaccgcatg ttgatgcaac
    20941 tcacagaaga ccagatgcgc cttaagcgta ttcagtctca ggagaaaaag gccgagctga
    21001 aacgccagtt gttaccggcc tatgcgccgt gggtggcggg cgtgatcgcc gccgatggtc
    21061 agcggcagga cgatgtgctg atgcatgtga tggtctggcg cattgacgcg ggcgactacg
    21121 acggggcgct gacgattgcc cgtcatgtgc tgcggcacga ctgggtaatg cccaaacgtt
    21181 acacccgaac caccgcctgt actgtggcgg aagagttcgc cgacgcagcg atacgagcct
    21241 ttctggcccg tcagtcgttc gatgccgggt tgttgcaggc ggcgctggac ctgacggccg
    21301 acgcagatat gccggaccag tcccgcgcgc ggctgtacaa gtcgctgggg tacgcgcaac
    21361 ggctggctga ctgcccggcg ccggcgctgg ataacctgcg gcgggcgctg gaactggatc
    21421 aacggtgtgg cgtgaaaaaa gatatcgagc agttggagcg acaactgcgc aacgccgaaa
    21481 acggcggata accgaacgtg cccacgcacc gggcggcacg gggtagcgac aggcatttgc
    21541 cgcatcaaca ccccgtccac cgcccaccca ttcagaggat gccatgagct ttattgcccc
    21601 tgagtccgcg cccgcgcagc aggacctgat taaaaacacc gccttctggc ccgatctgga
    21661 tatagctcac ttccgtgacg cgatgcgcac cgacggcacg gtgacaccgc ctcggctgcg
    21721 gcaggcggta ctgaccgcca tatctgaggt gaatgcggag ctgttcgact ggcggcaacg
    21781 ccaactggct gacgggtata cctcacttgc cgacgtaccc ggtgagcaac tggacggcga
    21841 gccagaacgc ctgcacctct accgccgcgc ggtgtggtgt tgggcgcggg ccaatctggc
    21901 ggagcgttac cgcgactatg acgccaccgc tgccggcaac aaacgcgccg acgcactgga
    21961 gccggccatt gatgatctgt ggcgggatgt ccgctgggca ttgagccgtc tgcaatcgca
    22021 accgcatgtg attgtggagt tgatttaatg caggtgcggg cgcagcaaca cgacaccgta
    22081 gacgcactgt gctggcgtca ctacggccgc acagcggggc tgaccgagca ggtattggcg
    22141 ataaatcccg gtctggcgga tatcggcccg atcctgcctc acggtctgct tgtggaactg
    22201 ccggacgtgg cgctggccgc cacgcaagaa actcttcaac tctgggactg acgtatgaat
    22261 gaaaccgata aaagtattgt gaccctgttc atcatcggga tgctgattgc cgtcggcaag
    22321 gtgctggccg gcggcgagcc ggtcaccctg cggctgtttc tcggccgtgt tctgctgggc
    22381 ggctttgtct caacggtggc cggggtggcg ctggtgcagt tccccgacct gtcgccactg
    22441 gctatcaacg gtatcggcgc ggcgctggga attgcgggtt atcaaaccat cgagctgctg
    22501 atccagcggc gcgccaagca gctgagcgat aaggcgggcg gtaatgaata atccaaacct
    22561 gcaggcattt ttggacatgc tggcgttttc cgaaggcacg gccaaccatc cgctgacccg
    22621 taatcggggc tatgacgtga ttgtgaccgg cgccgacggc gcgccggaga tttttaccga
    22681 ctaccgcgat catccgttcg ccaatggccg accggcgaaa gtcttcaaca aacagggcca
    22741 gcgctccacc gccgctgggc gctatcagca gttgtaccgt tactggccga cgtataagaa
    22801 acagttgcgc ctgccggatt tcagtccggc atcacaggat acgctggcaa tccagcttat
    22861 ccgcgagcgc cgggcgctgg atgacgtact ggccgggcgt attgcctgcg cgatcgtcgc
    22921 ctgcaataac atctgggcct cgctgccagg tgcgggctac ggccagcgag agcatgacgc
    22981 cgttcggctg ctgagcgtgt atcaacaggc cggcgggagg ctggcgtgag cctctggctg
    23041 aaagtcgccg ccctgatggt gttactggtg gctgccgtgg cggtgcaatc ctggcgattg
    23101 agtcacgcgc agcaactggc cgaccagcag gcgcagacgc tgaccgctca acacgcggcg
    23161 ctgactgaac aggccagcca gttgaaaagc ctggctgacc tggccgagcg caacaacgcc
    23221 gagcaggcgc ggctgcgcag tctggccgcc gatactcagg aggcactaac cgaacgtcag
    23281 aaaacccttg cgaggttgca acgtgaaaat gaggcgctta aacgctgggc tgacactgct
    23341 ttgcctgatg atattatccg gctgcggcag cgtcccgccc tcaccggtgg ccgtacttac
    23401 cgtgaatggc tgtcccaggc taacgccctg ccggtttccg gcggccagcc cgcaaactaa
    23461 cggcgagctg aataaccaat tggatctgac tgaggctgcg ctggccgact gcgccgatca
    23521 ggtggatatc actattgctt gtcaggaaca ccatgaacaa accgcgatta ctacgaaacg
    23581 cgctgagtag cgccgtgcca cacctgcgtg ataatcccga ccggctgcat gtatttgtgg
    23641 aatcgggaac ggtggtagga acactggccc cgtctctctc ttgggaatat cgctacaccc
    23701 tgactctgat tgtcaccgac tatgccggga atgaagattt gctggtggcg ccggtgatgg
    23761 cctggctgcg cgagcatcag ccggacctgc tggcgaaccc ggagaaacgg gaaaaaggcg
    23821 ttgaatttga aaccgaaatc ctgaacaacg gcagcgtgga tatctccatc agcctgaagc
    23881 tgaccgaacg tgtccaggtg cgcgccggct ctggcaatca ggtggttgag ccgttgctgg
    23941 agccaggcga accagacgac tactggatag atcgccgtgg ataacctgca gcgcattgat
    24001 gactggctcg ccgccctgct ggcgaaactc acgcctgccg agcgtaaggc attgttgcgt
    24061 ggcgtagccc gcgatctacg caaacggcag caagagcgta tccgcctgca gcagaacccg
    24121 gacggtacag catttgagcc gcgtcgggtg tcgctgaaag ataagaaagg tcgcatccgt
    24181 cggcagatgt tcagcaagct acgtgccgcc aaatacctga aagccagcgc gaccgcgacc
    24241 gaggcggatg tggggttcat cggcagcgca caacgactgg cgcgggtgca tcactatggc
    24301 ttgcgcgacc gggtacgcga gcacggcccg gtagtgaaat acgctgcgcg tcaactgctg
    24361 gggatggata ctgagttaat aaatcacatc cttaataaat tacatgtatc aattaagtaa
    24421 aatttacggc tatttcccta ttagtttgtc gtagttaggc atacctgata taaactccat
    24481 agtatgggcg tgtgtttggg tatctcctat tctaaatgac tcagtcatta tttttatcat
    24541 tatgttatac tcggcatatt ctgatatatt tatggatggt ttttcatacc tattggccct
    24601 gtatttctcc atgaattcat aagcatccct tggttgaaag atgaatttct ctctcagtaa
    24661 ggctataaaa accagagaat taatatttag ctctgagaat aattttctgc tattttctat
    24721 gtttattttg ctttttatat cctcatggag gtggaaaaac tttttaatga gaaggaaagt
    24781 taaaaccatt atggctttgt catccttatt gttttctcct tttatctttt tctctatttc
    24841 aaccatcaaa ccatgcatgt ctattatttt attaccacat ggatttaatc tgtttttttc
    24901 tatcatatct attataatat ttagatatct ctttatttct gattttgtat atttattcgg
    24961 gtttgcaatc caatactcat cggttttctt tatatcgaaa atgccatgaa taacttcatc
    25021 gtaaatttct tcttttcttt cctctttttt agatttaata atgaaatttt ttataacctc
    25081 acgtgctaca acggctaatc cgttaaatgt aagaaaaggt ttatcatcaa ttaataccct
    25141 catatcatgc gttgggaatc ctgatatttc cttcggtatt ttttttaatt catgaatata
    25201 agaggacctt aagtcatagg cgttttttaa cgccaacaat aaatcatccc tgcttatttt
    25261 tctgtaatct cttctatcaa ctcgataaaa atcatcttca atattactta tgatataatt
    25321 tacataattt tttcctattt tagcatgttt ttctttaatt atttcatttc ttattaagtc
    25381 ttgtttttca ggaggtagtg tggcgatttc ctgatcgatt aaatttcttt tcgctttatc
    25441 gtaatcattc catgatgctt gatagttacc tttttcagtc tgtgctaatg cttctagtga
    25501 tgctaccaga agagaatagg ccgcatgact atcatctaag attctataca ttgcagaaac
    25561 atacctatga atagatttta atgctacctc gtaatccttt ctattcattt ttaacatcat
    25621 agatatgagg tttttgaaat gttttatctc tcgatccttt aaaatgacat cctgatcaaa
    25681 gaattgactt ataaataaaa atggcctttt gtatgaattt gaggtgtcgc cttgaagtaa
    25741 actttctatc agatgcgaag atgttgtgca agtggcattc attgagaatg aaaagattgc
    25801 agatatgtca gcaatcattt cattacctcc catacaagat aacgggtttg actcaccatt
    25861 attgaattta tttttctgtt tacagttcat ctcggcaatt attattttat aggatgaatt
    25921 tattgttgtg tttaatagtt ttcctatcgg ggtttcaata ttgtcatcaa aaaatatagc
    25981 atttgtatat ataggagccc gatgcactga ttcttgaata tcatcatcgg gattaaaaaa
    26041 attaccatta cttacttgga gcatatgtcc tcctatggaa tttaagatgt ttttacaggc
    26101 caaccattag tatagcttgt agattagccc tgtattgtgt gtttgctcat acatggtgct
    26161 ggaactgcag ctttgtttca catcatgcag gctatccccc atgaacgcac aaactaccga
    26221 aatcatgcgc ctgttgctga acctgatccg ggttggcgtc gttatcgacg ttgacccgaa
    26281 taactggctg tgccgggttc aaacgggtga attacaaacc ggctggctga actggctgac
    26341 tacccgcgcc gggcgcgccc gcacctggtg gaaaccctcg cagggggaac aggtgttgct
    26401 gctggctatc ggtggcgagc tgaccaccgc ctttgtgctg cccgccatct tctccaatga
    26461 caacccgcca ccgtccgcct cggatgatgc actggtgacg gtgtttcctg acggcgcgcg
    26521 ctttgagtac gaacctgcca acggccagtt gctgattgac ggcgtaaaaa gcgtggtgct
    26581 gaacgcggat acgctgacgc tcaacgcggc cgtgaccatc aacggccagg tcacccagca
    26641 aggcggcgac atgtcatcta acggcgtggt ggtgcatacc catcagcatg gcggcgtaca
    26701 gggtggcggc agcaataccg gggggccggt ctgatgcgct atctgggcat gaatcaacaa
    26761 accggcggac ggataagcga aatggcacac ttgcggcagt cggtccgcga catactgata
    26821 acgcccctcg gctcgcgcct ggcgcgtcgt gaatacggct cgttgttgtc cgaattgctg
    26881 gaccagccgc agaacgccgc cacccgcttg caggtgatgg cggcgattta tggcgccctg
    26941 caccgctggg agccgcgttt gcaactaacc gccattgatc tgaccactac gctggatggt
    27001 cgtatggtag cggacctgac cggcgaactg gtcagcggtc agtcggcggc actgtccgtt
    27061 tctctgggga gcgatgcatg agtgtgatcg acctgtcgca actgcccgca ccggatatcg
    27121 tcacggtgcc ggattttgaa accgtgctgg cggctcgcaa agcggcctat ctggcgctgt
    27181 tcccagccga tgaacgcgac gcggtagccg ccacgctggc gctggaatca gagccggtgg
    27241 tcaagctgct acaggaaaac gcttaccggg aaatattgct gctgcagcgc atcaacgaag
    27301 cggcgcaagc gtgcatggtg gcgtatgcgc tgggtaacga tcttgaccag ttggccgcca
    27361 attacaacgt tgaccgccta acggttaccc cggcggatga aacagcggtg ccgccggtag
    27421 acgcggtgtt agagagtgac gacgacttac gccagcgtat cccggccgcg tttgaggggc
    27481 tgagtgtcgc cgggccgacc ggcgcctatg ccttccacgc cctgagcgct gatgggcgcg
    27541 tgtcggatgc gacggcgatc agtccctcac cagccgcggt gacggtgacg gtgttgtcac
    27601 gcgagagcga cggcgccgcc ccggatgatt tgctggccgc ggtggcggct gcacttaatg
    27661 atgagtcggt gcgaccggtg gcggatcggg tcaccgtgca gtcggcccgc gtggtgcctt
    27721 atgcggtcac cgcacggttg tacctttatc ccggtccgga ggccgagccg atacgccagg
    27781 cggcagaagc caagttgacc gcctacatca gcgcccagcg gcgactgggc cgcgatattc
    27841 gccgctctgc actctatgcc gcgctgcatg tggagggagt acagcgggtg gagctggact
    27901 ccccggcggc ggacgtggtg ctggacgata cccaggccgc ctactgcacc ggtaatcagg
    27961 tcaccatcgg gggcaatgat gaataacagc ctgttgccgc cggggtcgtc tgcgcttgag
    28021 cgtcggctgg cagcggcctg cggtgatatc agtgcgctgt cggtgcctat ccgtcgggta
    28081 tggaaccccg acacctgccc ggcgtctttt ctgccgtatc tggcgtgggc gttttctgtt
    28141 gaccgctggg atgaacactg gccggaggcc gtgaaacgtc aagtgatcaa ggatgcgttt
    28201 tttatccacc gccacaaggg caccatcggc gcgctgcgcc gggtggtgga gccgttcggc
    28261 tatctgatcc ggatcacaga gtggtggcag atcggcggca cgcccggcac cttccggctg
    28321 gatatcggcg tgcaggatgc cggcatcacc gaggaaacct atctggagct ggagcgcctg
    28381 attgccgacg ccaaaccggt aagtcgccac ctactggggc tggctatcca cctcgacagc
    28441 cggggcgcgc tgccggtcag cgccgggcag tacagcggcg atgcgctgac cgtctacccc
    28501 tatttccccg aaatccttac taccggcggc gcggatagac gcgcggcggc agtacatctt
    28561 tctgacaacg tgagcgtaag cgcatgacaa ccaaatacta tgcgatcctg actaacaccg
    28621 gcgcggcgct gctggcaaac gccaccgcgc tcggacggca actaccgatt acacaaatgg
    28681 cgctgggcga tggcggtggc accctgccga ctcccgacac ggcacaaacc aaactggtga
    28741 atgaacggcg ccgggcgccg ctcaattctc tgagcgtaga cccggtgaac cccagccaga
    28801 ttattgccga gcaggtgatc ccagaagacg agggcggctg gtggatacgt gaaatcggtc
    28861 tgtatgacgc cggcggcaat ctgattgccg tcgccaactg cccggaaacc tacaagccgc
    28921 agctacagga aggctccggc cgggtgcaga cggtgcgcat gattttgatt gtcagcagca
    28981 ctgacgcggt aacgctgaaa atcgacccgt cggtggtgct ggcgacgcgg gcgtataccg
    29041 acggcaaagc tgccgaggct aaagcctaca ccgatgccca gacgggcggc gcaaaaattg
    29101 aagtgaaagc ctacaccgat aacatgctga ccgcgcatct ggcggcggca aatcctcacc
    29161 cgcagtatgc ggtgtccgct gatgttgccg ttgccatgaa agcgaagctg gatgttgccg
    29221 acgtggtggg gatcccgctg ccgtggccgc aggccgtcgc accgagcggc tggctaaagt
    29281 gcaacggtca ggctttcgat aaagccctct atccaaaact ggcgacggct tatccgtctg
    29341 gtgtgctgcc ggatttacgt ggtgagttta tccgcggctg ggatgacgga cgcggagtag
    29401 acagcgggcg cgggttgcta tcagcacagc gcgccacatt actacgcact gcaatgatcg
    29461 actacgccgg aaccgattta gacaattcca gtgttttaaa cggactggcg tatgccgagg
    29521 ccgatggttc taccaaatcc atctatccag cgtcggccat ttatgcgccg aatggtgaca
    29581 atctgagtaa cacggcagcg gcggataatg ccgtatcggg cacatcatca tttgctgcat
    29641 ttcagacggg tgttacgcca ccaaactgga tttccgttcg ttcccgcaac gtcgccttta
    29701 actacattgt gagagctgca taatgagcga aaaatattct gttgctgtac aaaacgccgg
    29761 attgggcaaa aacgggctgg ctgaacgggc gggctggctg acggtctatc atgttgaccc
    29821 gctgacccgt gaatataccg gtgccagtta cgagtatctg atgatcggca ctggcctacc
    29881 ggctgacagt tacgtcgacg cacccgatct gcccggtgcg ggccaggcat tacgcagaac
    29941 ggcggacggt agcgtctggg aacatgtgcc agacctgcgt ggtaaaacgg cgtacagcac
    30001 aacgaacgga caggcgcaga cagtacagga tatcggcgcg ttgccgggcg ggttaacgtt
    30061 gctggcaccg gcgacggcgt ttgatgcgtg gaacggtgac cagtgggtga ccgacaccgg
    30121 cgcccagcag gcggccgcta tcgcggtagc ggcgcaaacg ctggcagacc gtaaagcggt
    30181 ggccgtcgcc cgcatcaatg agctgaacta cgcggtaacg ctggggatgg cgacccgcgc
    30241 ggagaaagac gcactgaccg actggcaaac ctacctggtg caattaagcc gtatcgacac
    30301 cgccgccgcg ccggatatcg actggcccgc cgccccggaa aaataacccc accttgtacc
    30361 atcgctgaca caaggcgtaa tgaatgcgcg gttgtgtcag gcattacacc atagcagaca
    30421 cccaattacg gaggctgcta tggcaactga ctatcatcac ggtgtgcgtg tcaccgaaat
    30481 caacgacggc acgcgcacta tcaccaccgt atccacggcc attgtcgggc tggtctgtac
    30541 cgccgacgat gccgacgcgg caacctttcc cctcaataag ccggtgctga tcaccgacgt
    30601 gctgacggcc agcggcaagg cgggcgagtc tggcacgctg gcgcgtgcgc tggatgccat
    30661 cgccgatcag gccaagcccg ttatcgtggt ggtgcgtgtg ccgcagggcg agagcgaggc
    30721 ggaaaccacg tcaaatatca ttggcggcgt caccgccgac ggcaagaaaa ccggcatgaa
    30781 agccctgttg gccgcgcaag cgcagctggg cgtaaagccg cgcattctcg gcgtgccggg
    30841 ccatgataac aaggcggtgg cggttgagtt ggcgagcatc gcccagagtc tgcgcgcctt
    30901 cgcctacgtc agcgcccacg gctgcaaaac ggtggcggac gccatcgcct accggggcaa
    30961 ttttagtcaa cgtgaactga tggtgatctg gccggacttt gtggcctggg ataccgtcgc
    31021 cgatgccgag gcgaccgcct gggcgaccgc tcgcgcactc ggtctgcgcg caaaaatcga
    31081 cgaacaaacc ggctggcata aaaccctgtc taacgtcggc gtgaacggcg tcaccggcct
    31141 gtcggcggat gtgttctggg atttgcaaga ctcggccacg gatgcggggc tgttgaacca
    31201 gaacgccgtg accacgctga tccgcaaaga cggcttccgc ttctggggca gccgcacctg
    31261 ttcggatgat ccgctatttg cctttgaatc ctacacccgc accgcgcagg tgctggccga
    31321 tacgatggct gaggcgcata tgtgggcggt cgataagccg ctgacgccct cgctggcccg
    31381 agacattatc gaaggcatcc gcgccaagct gcgcgagctg gtcgcgcagg gctacctgct
    31441 gggcggtgac tgctggattg atgagagcgt gaacagcaaa gacacgctga aagcgggcaa
    31501 actcgccatt gactacaact acacgccggt gccgccgctg gaaaacctgc tgttacgcca
    31561 gcgcatcacc gacacatacc tgatggactt caccggccag gtgagcggct aaggggctga
    31621 gacatggcat taccacgcac actgaaatac ctgaacctgt tcaacgacgg gaacaacttt
    31681 atgggggtgg tcgagtcgtt cacgccgccg aaactgaccc gcaagctgga gaaattccgg
    31741 ggcggcggca tgtccggcac ggttgatatc gatatggggc tggacgatgg cgccctggaa
    31801 tgtgaatggc agattggcgg ctgggagccg ctgatcttca agcagttggg cacggcaaaa
    31861 gccgacggtg tgcaactgcg atttaccggc tctatccagc gtgacgacac cggcgaggta
    31921 caggcggtgg agattgtatt gcgcggtcgt cataaggaag tcgacagcgg cgaagccaag
    31981 caaggcgaga aaaccaccac caagatctca accgtctgta cctattacaa gctgaccatc
    32041 aacggcgatg tgctggtcga gatcgacatt ctcaacatga ttgaaaacat cggcggagag
    32101 gaccgactag ccgaacaccg ttcagccatc gggctgtaat gcgctgcagc acagacagtt
    32161 ttgtctgtgc tggccactga tattttaccg gagaacccca tgcaggaact gaacactgaa
    32221 aagaccgtca cgctcgacag cccactgaaa cgcggtgaca cggtgattga ctccattacc
    32281 atccgcaagc ccacctccgg cgcgctgcgg ggcgtgcgcc tgcaggcgtt aatggagatg
    32341 gacgtcaacg cggtaatggt ggtactgccc cgcgtcacag ccccggccct gaccgccacc
    32401 gaggtgctgg agctggaccc ggccgacctg gtggcgctgg cggtcgaggt ggtcactttt
    32461 ttgttgccga agtcggcccg gcaggattcc ccggcgagct gacggtagag gatttggtgg
    32521 cggacattgc taccgtgttt cactggccgc ccgccgtcac tgcggatatg ccgttaaccg
    32581 aggtgctgac gtggcggcat aaggccattt tgagaagcgg agccggtgat gagtaacagt
    32641 ctgcgtctgc aggtcgttct ggatgcagta gataaactga cccgcccgct ccgtcaggcg
    32701 caggcgggca gcaaagggct atccactgcc atcaaagaaa gtcaggtgcg cctgaaagcg
    32761 ctggacacgc aggccgcccg aattgatggc ttccgtaaag ccagcgcgca ggctgccgtg
    32821 gtcagtaaca gcctgaaggg cgcccgcgag gaagcggccc gcctggcaac ccaatttgcc
    32881 gccaccgagc gccccaccgc ccagcaggcg cgcctgctgc aacaagccaa agaccgggtt
    32941 aacgaactgc aggataagta caacggcctg cgcgtatccg tgcagcggca gcgcgaggcg
    33001 ctgagcgcct ccggcatcga caccaaaaaa ttgagcgacg cccagcggca actgcgcagc
    33061 gaagcacagt cggtgaccga ttccctgcaa cgtcagcagc aggcgctgaa acagttgggc
    33121 gagcggcagc agaagctgaa cgccatcaag gcgcggcatg aaaagacgct ggacacccgc
    33181 aacaagctgg ccggcaccgg cggcacgatg gtggcgaccg gcgtcgccac ggcggccccg
    33241 atgattgcgc cgatcaaggc gtatgccgat tcagaagatg ccgccacaca attggctggc
    33301 tccatgatgg ggccgggcgc caaggtgtcg gcggagtttg agaaaatcaa cacgttggcc
    33361 gtgtcgctgg gcgacaggtt acccggtaca acggcagatt ttcagaacat gatgaccatg
    33421 ctgcgccgtc aggggctgtc tgcgcaaagc atcctcggcg gcaccggcga ggcagcggct
    33481 tatctgggcg tgcagttgaa aatggcgccc accgaggcgg ccgagtttgc agccaagatg
    33541 caggatgcga ccggcaccgc cgaaaaggac atgatgccgc tgatggatat catccagaag
    33601 gggttttacg ccggggtaga tccgaccaac atgctgggcg ggtttgccaa gattggcagc
    33661 gccatgtcca tcattaagaa agacgggata gaagcggcaa agatttttgc gcccctactg
    33721 gtcatggcgg atcaggcatc tatggaaggt ggtgcagccg ggaacgccta ccgcaagatt
    33781 tttcaggcgg cgatgaagac cgataaagtt aaagatgtga acgacgacct gaaagataaa
    33841 aaaatcaaaa ttaagttcga tttcactaac ggcaaaggcg agtttggcgg gctggaaaaa
    33901 atgtacgccc agttggggca gttgcagaaa ctgaacacgg aaacccggct gaaggtgctg
    33961 aaagatatct ttggcgacga tgcggaaacc ctgcaagcgc tgaacatcat gatcaccaaa
    34021 gggctggacg gctaccggga aacccaggcc aaactggagc agcaggcatc cctgcgtgag
    34081 cgtgtagacg cgcagttgca gacgctgggc aataaatggg atgcggctac tggttcattt
    34141 accaacgcaa tggcaagcat tggcgccacc gtcgccccag acctgaaaca gttgattgac
    34201 gggctgggcg aattggccgg aaagctcaac gactttgtga aagcccaccc ggtactggtc
    34261 agcagcctgt ttaaatctgc ggccgggttt gccattgccg ccaccgcgat cggcatcctg
    34321 tttgttgcga tagcctcagt gatggggccg ctgtcgttgc tgagaatgag tctgggtatg
    34381 ctcggtttga aactacccac tctgggcggt gccgtggcgc gttttgccgg tctgttcggt
    34441 agcgtcggct ctgtgtttag tggcctgggg cgtctgctgc tgtggctggt ggcctcgccg
    34501 tttgctctgc tgcgcccggc gttgatgttt gtcggcggga tcctgggagc gttgcttagc
    34561 cccgttgcgt tgtttatggc ggcggttgtt gctgtcgggg tagcgattta ccaacattgg
    34621 gagccgatca aggcattcct gggcggcgtg gtagacggtt ttacagcggc tgccggcccg
    34681 attgtggcag cgtttgagcc gttaaagccg gtgtttgcgt gggtgggcga taaagtccag
    34741 gcgctgtgga aatggtttac cgacctgctg gagccggtga agtggtccgc tgccgaactg
    34801 gataacgccg ccgcaatggg gcgtaaattc ggggagttct tagccgacgg gctgagcaag
    34861 gtcatgcacc cgctggattc gctgaaatct ggggtgtcgt ggctgcttga aaagttgggc
    34921 gtggtcaaaa ccgagtcgga caagctgcca tccgccgatg tgatccagaa agcccaggat
    34981 gccaaagccg cggcgaccgc cccggttaat cctaccaatg cgacaccctg gggcgcgccg
    35041 ccggtctaca gcccatttgc gggcatgtat gatagcggcg ggattatccc cagcggccaa
    35101 ttcggcatcg tcggggagaa cggcccggag atcgtcaacg gcccggcgcg catcaccagc
    35161 cgccgccata cagcagcact ggccgcggct gtactgggtg ctgccgcttc gccggtactg
    35221 gcccagccgc tgcacccgtt cagcctgcca gccagtcagt acggcagtgc tggacaggaa
    35281 tactcagccg ggcggttagc caccgccgcc ccggttaccg tcaatgcacc catttcgatt
    35341 tatacccagc cgggccagaa cgcgacggat atcgcccgcg aagttgcccg gcagttggat
    35401 gaacgggaac gccgggccag agcgaaatca cgcagtaatt acagcgacca gggggggatc
    35461 ggatgatcaa tattaacttg agtgtcagtg tcatgatggc gctgggcctg ttcgtgtttg
    35521 gcctgcaaac cgtgccgtac caagagctgc agcggcaacg taactggcgg catgtcacca
    35581 atagccgcat cggtcagcgt ccatcctggc agtttatcgg gccggacagt gacacgctga
    35641 cgctgcaggg cgtgctgcta ccggaaatca ccggcggccg gctatcgcta ttgatgctgg
    35701 agaagatggc ggagagcggg aaggcatggt cactgattga aggcaccggc acgatttacg
    35761 gcatgtatgt gatcgaaagc ctgagcgaaa cccgcaccct gttttttttc aatggcagcg
    35821 cccggcgcat tgagttcacc atcacgttaa aacgggtgga tggagatttt ggggcggtga
    35881 ccggtagtct gtcggaacag tggacctcac tgaaagacag tgcgaccggc tacgccgaca
    35941 aggtgaccgc cgctgctggt caggctgttg atgcggtgaa gggggtgttt tcatgagcct
    36001 gctggaccag atgagcaccg gccgggagtc cgcgccggat taccgtatca ccatcagcgg
    36061 caaggatgtg accgaaacgc tggacaagcg actgatgtcg ttgaccatca ctgataaccg
    36121 ggggtttgag gccgaccagt tggatttaga actggacgac gccgacgggc aactgatgct
    36181 gccgcgtcgt ggcgcccaaa ttaccgtttt tctcggctgg aaggggtatg cgctgacgaa
    36241 aaaaggcacc ttcgtggtgg atgagattga gcacagcggc gcgccggacc ggctgacggt
    36301 gcgggcgaga agcgcggact ttcggcagac gctgaacatc aagagggaaa agtcgtggca
    36361 tcagaccacc gtcggcgcca tcgtgcggga aattgccgac cggcacaagc tggttgctgc
    36421 actggatgag gctaccgccg cccagaaggt cgaacatatc gaccagacca acgagtcaga
    36481 ctgttcattt ctggtgcgac tggcaaaaga tcacggcgcg attgccgccg taaaagatgg
    36541 gcggctgcta ttcctgcgtc agggccaggg aaaaacagcc agcggaaagc cactgccggc
    36601 agcgattatt acccgtgaag acggcgacag tcaccgcttt acccttgcgg atcgtggcgc
    36661 ttacaccggt gtagtcgcta actggctgca taccaaagag ccgaagaaaa aacaggaagt
    36721 taaagtgaag cgccgccgac gtcgccgccg aacgtcaacg aaaaagaaaa aggagccgga
    36781 ggccaaacag ggcgagtacc tgatcggtac tgacgaaaac gtgctggtac tcagtcgaac
    36841 ctacgccaat aaagctaacg ccgagcgcgc agctaagatg cactgggagc ggctgcagcg
    36901 aggaacggcc agtttctcta tcgatctggc gcgcggccgt gaagacttgt tcccggagtt
    36961 accggtcaaa gtcagcggct ttaagcagga gattgacatg gccgactgga cgatcacaac
    37021 ggttacgcat tcactgaatg accggggttt tatcacgtct ctggaatttg aagtaaaaat
    37081 cgacaacttg gatatggagt aaaattatct ttatgtgaat tttattctgt ataattagta
    37141 aaacgtgaat ttatggctct ttcgtttgag gattcagcaa aatgatgaaa tgcccactgt
    37201 gtggcaatgc agcacacacc cgctcgtcgt ttgaggtcac cgacacgaca aaggagcgtt
    37261 acaaccagtg caccaacatt aactgcggac atacgttcat cagtcatgaa acctttgttc
    37321 gctcaattgc gcgccccggg gtcgttcagc acgttgcgcc acatccgaaa gggcaacagg
    37381 tggtaatgaa tctgtaatga gcagtataaa agcccgtttt tgacgggctt ttatactaaa
    37441 aatacgagcc gatattctaa cctctatgca caatagcttc attcagagcg ttaataacat
    37501 cattgatgta tttcccatct tggcttgata gggcttgtga ttctcctgaa gcactattga
    37561 gaaaaacaat ataatttgga cggatagact taaaccaagc aattgcaatt ataaatatta
    37621 ccaccccaat agctttgaat agtaatgttc ccgcagcgaa agcagttata atgcctattg
    37681 ccgctagcac aacagcgcct gttttggggg gatttgtctg tccgcgttta actgatgtta
    37741 caccattcat cgcataagtc gttgagccaa ccctaaacct tgcatttgtg atgcttacat
    37801 tgccgtcatt ataaaattct gtttcttcca tttttgcccc agcctataac ttattgtgag
    37861 tagtgttctt agtataaaaa atattaaaaa ataagaatag ttctaaaatt tcatatcaaa
    37921 ttgttagtgt taaaagataa cgcccgatga aaatggcata agcaggtttt gtatcgtggg
    37981 tgtatctgat actcagacga aaagaagatg catgaatttt taattagcgt atatcagact
    38041 tttgatatat gcatcagctt catcgccaag catagggcct agttttttgc actccttccc
    38101 gccgcctttc actgtgtagc cttggtttcc atcggcgttc agcattacca cgctggtgat
    38161 tgtttctggc ggccaaggat ttttatcaaa ctggccagag caaaccccat taaaaaataa
    38221 gcggatagtt tcctctgtga tctgtggttt ctttatcaca attgtgagct tgccgccttc
    38281 aagggagtgg gactttgttt ggtagacctt gatcagctcc tcaatctttt gcggaacggg
    38341 gtcggccgct gcgctgaatg ttgcggcaat caagactgac agtaagaatt ttttcatcag
    38401 aggttgctcc tgcattgatt tgttgaagaa atctatcgcc attttatcgc caccattggt
    38461 agcatcaata aaaaagccac cgcgtgaggt ggcttaatta tatgattttt atgctgaaat
    38521 ttggtggccc ctgttgggtt tgaaccaacg accaagcgat tatgagtcgc ctgctctaac
    38581 cactgagcta aggggccaag cggatgttga ttataggtaa tccggctggt ggggtctata
    38641 gcctggcggc catatggttg ttttgtatcc agtattcagc agattgttat tattaagaat
    38701 ttattatgtt tatagtggtg atgggcggta attgcgagta agggcaggga agccgaacgt
    38761 ggcggccaag tgttatgctg tgagtagcca ctgatgtgag aaataaaaac ccccggtcag
    38821 gaccgggggt gataacactg attcaataaa aaattttatt aatcgtccag gaagctacga
    38881 agtacttcgg aacggctcgg gtggcgcaat ttacgcagcg cttttgcttc aatttgacga
    38941 atacgctcgc gggtcacgtc gaactgtttg ccgacttctt ccagcgtatg gtcggtattc
    39001 atgtcgatac cgaaacgcat acgcagcact ttggcttcgc gtgcggtcag gccggccagc
    39061 acgtcgtggg tggcggaacg caggctttcc gaggtggcgg aatccagcgg cagttccagc
    39121 gtggtatctt cgatgaaatc ccccagatgt gaatcttcat catcaccgat cggggtttcc
    39181 atagagatcg gctctttggc gatcttcaag accttgcgga tcttgtcttc cggcatcagc
    39241 atacgctcgg ccagctcttc cggcgtcggc tcgcggccca tttcctgcag catctggcgg
    39301 gaaatacgat tgagtttgtt gatagtctca atcatatgca ccggaatacg gatggtgcgc
    39361 gcctggtcgg cgatggaacg ggtgatcgcc tgacgaatcc accaggtggc gtaggtggag
    39421 aacttgtagc cgcggcggta ttcgaatttg tctaccgctt tcatcaggcc aatgttacct
    39481 tcctgaatca gatccaggaa ctgcaggccg cggttggtgt atttcttggc gatcgagata
    39541 accagacgca ggttcgcctc caccatctct ttcttggcgc ggcgagcttt ggcttcgcca
    39601 atcgacatac gacggttgat gtctttgacc tgttcaatgg tcaaaccagt ttcgtcttcg
    39661 atctgttgca gtttctgcag accgcgatgc acgtcgtctt ccacttcgcg cagtttttca
    39721 caccagggtt tgcccattga aagcgcagca tcgaaccatt tacgattggt ttcattgccg
    39781 gtgaacagcg tcacgaagtt tttcttcggc attttgcaca gttcgacgca cagtttcatg
    39841 atctggcgtt cctgcgcacg cacgcggtcc atcatggcac gcatgttgtt caccagcagg
    39901 tcaaactgct tcggcaccag acggaactgt ttgaacactt cagacagctt gttgatttcg
    39961 tcaatagcag tcgggtggct gcggccgtgc gccttgatgc ttacgcgagt cgcttcatac
    40021 tgatcgcgca gttcggcgaa tttctgacgc gccagctccg ggtcgatgct gttgtcatca
    40081 tcggtgtcgt cttcgtcttc ttcgctttcg tcgtcgtcat catctatacc gtcgtcagcc
    40141 ggctcggcgt tctcgggcgt ggtattcggc gccagatctt cttcggcgtt cggatccaca
    40201 aaggcggtga tcaaatcgga caggcgactt tctcccgctt cgacgcgatc atattgatcc
    40261 aacagatagg tgatggcttc cggatattcg gcaacggagc actgtacctg attgataccg
    40321 tcttcgattc gcttggcgat atcgatttcc ccttcacggg tcagcagttc gacggtaccc
    40381 atctcacgca tgtacatgcg aaccggatcg gttgtgcggc caatctcaga ttcaacgctg
    40441 gacaatacct gcgccgctgc ttcggcagcg tcttcatcgg cggtattctc ggccagcatc
    40501 agatcatcgg catccggcgc ttcttccatc acctggatgc ccatgtcgtt aatcatctgg
    40561 atgatgtctt cgatctgatc ggagtcgatg atatcttccg gcagatggtc attgacctcg
    40621 gcataggtca ggtagccttg ctccttacca cgggtgacaa gtagcttgag ctgtgactgc
    40681 gggttttgct ccataagacg gtatccacac ttcagaatat tggggttggt gtcggtcagc
    40741 gtaagtcgct aacaataaca ttaggggaat ttttcttatc gccgcagccc ccgtagcggc
    40801 acactgtagg gctcaaccct actatttatc ggcaattaag ccgcgggaaa tcagtttttt
    40861 cgcgtcagcg ccagttgcag cgaccacagt tccttgcgct cgttcatgtt cagcccatgc
    40921 gttctctcgc gggctatcag cgtgtccatc cgcaactgca gcaactggtc gtagagctcg
    40981 gtcaggctga ccctgaattt ttcttcgagc tcttcctctt caatcatatg gtcccaggcg
    41041 gccagagttt caagctgctt gcgatattta ctttcgcgat atttctccag cagcagtccc
    41101 atgttcatgc ctgggctttc attgcaggtt ttcaccagat ccaaaaacag ctccagtcct
    41161 gcaactttgt tctcttccac accgtcgagc gccagttccg gcacttcgaa ggacagcctc
    41221 ggattttgta ctaaaagtcc tatcagtata cgcatagttg tgacttttag ccgtggaggc
    41281 tggtaggacg atgtttgctc cgccgctttc ggcagcaggc gatccaactg gctgtcgtcc
    41341 aacagcccca gtttattgcc aagttgttga cgtaagtata atcgcaacgt ttcgcccggc
    41401 acctgcccaa ttagaggtag agccagcgta ctgagcttgg tgcgcccgtc cggggtactc
    41461 atgtccacct gctgcagtag cgagtcgaac aaaaacgccg acagcggcat tgcctgctcg
    41521 atgcgttgct cgaaagccgc cttgccttcc tgacgcacca gcgtatctgg gtcttcgccg
    41581 tcgggcagaa acataaagcg caactgccga ccatcatcca gatagggtag cgcggtttcc
    41641 agcgcacgcc aggcggcgtc gcgtccggcg cggtcaccat cgtaacagca caccacctga
    41701 tcggtggcgc ggaacaacaa ctggatatgg tccgccgtcg ttgatgttcc tagcgaagct
    41761 accgcgtaat cgatgccaaa ctgggccagc gcgaccacat ccatataacc ttcgacgacc
    41821 agcagccgct tcaattccgg atttttctgt tgtgcctcgt acaagccgta caactggcga
    41881 cctttgtgaa aaatctcggt ttccggcgag ttcaggtact tgggcatacc ctcgcccatc
    41941 acccgaccgc caaaagcgat aacccgccca cgcttgtcac ggatcgggaa catcacccga
    42001 tcgcggaaac gatcgtaagt acggccgttc tcgttggtca ccagcatgcc ggcgtcggtc
    42061 aacgtggtcc gattttcgct gctgcggcca aaacgcttta acgcattgtc ccaccccggc
    42121 ggcgtacatc cgatagcgaa ttgccggatc acctcatcac tcaggccgcg tctggacaga
    42181 tactctctgg ccggcgtacc cgcaggttgg ttcagggtat gttggtaaaa agcgcttaat
    42241 tgttccatca gctcgtataa actttgccgc tggtggcgtt cgagctgggt cggaccggtg
    42301 cctgcttcgt aaggaacgtc caggctgtgc attgcagcca gttcttcaat actttcaaca
    42361 aattccagac gatcataatt catcaggaaa tcaatggcgt tgccgtgggc gccgcagccg
    42421 aagcaatggt agaactgctt gtcaccgtta acggtgaacg aaggggtttt ctcgtggtgg
    42481 aacgggcaac acgcgtgata atttttgccc tgctttttca atttgacgcg cgcatcgatc
    42541 aagtcaatga tgtcggtgcg agccagcagg tcattaataa atacgcgggg aatacgtcca
    42601 gccataagcc ccttatctat acacgtttat aaacgacaat aagccgcgca ttcctttcgg
    42661 aaagcacggc cttcgtatgc aactgctaag tctgcggatt aatcacgcgg tggaggacaa
    42721 acctccagaa aattaataca gacgagtgcg gcgtgcgttt tctcgagcca gcttcttggc
    42781 gtgacgtttc acagcagaag ctttagcgcg cttacgttcg gtagtcggtt tttcatagaa
    42841 ttcacgacga cgaacttcgg ccaaaacacc tgctttttcg caggaacgct tgaaacgacg
    42901 cagagcgacg tcgaacggct cgttttcacg tactttaatt accggcatgt gcctctcacc
    42961 ttagtaaatt cggtttgctg ctggccttgt gccagccttt tcaaaatggt gcggaattct
    43021 actgcaactg tggcgcattt gtaaagcgca tcagcgatca taaaacgcgc ggcgccggtt
    43081 cgctcgtctg cggactggct tatgatagac tatgctccgc ttgaatcaag ccgccgtggc
    43141 gggccgccgt aaatgtaacc gccgccgtaa gtgtaaccga gagtgaaaac agcaatgcgc
    43201 gtattaggta ttgaaacatc ctgcgatgaa accggggtcg cgatttatga cacgcaggcc
    43261 gggctactgg cgaatcagct ttacagccag gtgacgttgc atgccgatta tggcggcgtg
    43321 gtgcctgagc tggcctcccg cgaccatgtc cgcaagaccg tgccattgat tcaggcggcg
    43381 ttgaaagagg ctgggctaca gcgcagtgag attgatggtg tcgcttacac ggccggccca
    43441 ggtttggtgg gggcgctgct ggtcggcgca acggtagggc gttcgctggc gtttgcctgg
    43501 aacgtgcctg ctataccggt gcatcacatg gaagggcact tgctggcgcc gatgctggaa
    43561 gacaatccgc cggcgtttcc gtttgtcgcg ctgctggtgt ccggtggtca tacccagttg
    43621 atcagcgtta ccggcattgg cgaataccgt ttgctgggcg aatccattga cgatgcggcc
    43681 ggcgaggcgt tcgataaaac cgccaaactg ctggggctgg attatccggg tggaccgttg
    43741 ctgtcgaaaa tggcgcaaaa tgggcattct aagcgttttg ttttcccccg gccgatgacc
    43801 gaccgacccg gcctggattt cagtttttcc gggctgaaga cattcgccgc caataccatc
    43861 cgtgaaaacg gcagcgatgc gcagacgcag gcggatatcg cgcgggcgtt tgaagacgcg
    43921 gtggtggata cgctggccat caaatgccgg cgtgcgcttg acgataccgg gttcagccgg
    43981 ttggtgatgg ccggcggcgt gagcgccaac cggacattgc gtcagcggct ggcggacatc
    44041 atggctaaac gaggcggcga cgtattctat gcccgtcctg aattttgtac cgacaacggc
    44101 gccatgattg cttatgcggg agcggttcgt cttgcccagg gcgtgacgga tgaacttggc
    44161 atcacggttc ggccgcgctg gccactggct gaattgccgg cgctgtgatg ttctgactat
    44221 tccgccccaa ccgcatagcg gggcggagaa gcattacaat tcctgttcaa acaagaccag
    44281 tattgcttca tacagttgct tgacgctgaa gccccgggct ggcgtagtga aaatggtatc
    44341 gtcgccggcg atggtgccga gaatcccttc cgatttaccc agagaatcca gtagtcgggc
    44401 gataagctgt gctgcgccgg ggctggtgtg aatcacgact accgcgtcgt tgtaatccac
    44461 gtccagcacc aggtttttca gcgggctggt ggtggtagga acacccagtt cggcaggcag
    44521 gcaataaacc atctccatct tcgcgttgcg ggtacgcacc gcgccaaatt tggtcagcat
    44581 gcgggatact ttggactggt tgatgttctc gaacccatcg tcctgcagcg cctgcacaat
    44641 ctcgctttgc gagctgaact tctcttcttt taacagcgct ttgaacgcct taaccagatc
    44701 ttcttgtttc gtggagttac gcattctgca ccgtgtccgg gaaaagtgga atatgcggcc
    44761 attatgcatt tgaatgaatt tttatgcaat atgagcgcgt ataaaaccga attatcggcc
    44821 tgagatatcg gactgaaatg cgcggtgggg caatacttta ccagggtgtc aaaaaatgtg
    44881 ctcgtcatca cataaaagta aaataaatgt tatcaaaatg atgttgtttg gaggctgatg
    44941 gtcggtgtaa tgtaacacac ccgttaatca gtcgtgggct tatgctgggg tgcatcgcaa
    45001 ttgcctgtta ctttaattac ctttcagata tcaggcagat tgttagttta ttattaatca
    45061 catagtgcgt tatcgctgcg tgcctattta tcgccgcgga cctatgtagt gcccctctgg
    45121 aaacaggtct gacgcctggc ttctctcgcg agcataaccg tttttaacta aacgcatcca
    45181 cggtaatttt acttaacata ataaggagtt taggatgaaa gttgcagttc tcggagccgc
    45241 aggtggtatt ggtcaagccc ttgcccttct cctcaaaacc cagcttcctt caggttcaga
    45301 gctctctctt tatgatatcg cccccgttac gccgggtgtg gcggtcgatc tgagccacat
    45361 tcccaccgat gtgaaaatca aaggtttcag cggtgaagat gctactcctg ctctggaagg
    45421 cgcggatatt gtgctgatgt ccgccggggt ggcccgtaag ccagggatgg atcgttccga
    45481 tctgtttaac gtgaacgcag ggattgtgcg taacctggtt tcgcagattg cccgtacgtg
    45541 tcctaacgct tgtatcggca ttatcaccaa cccggtcaat accacggtgg cgattgctgc
    45601 cgaagtactg gaacaggccg gcgtgtataa caaagacaaa ctgtttggcg tcacgacgct
    45661 ggacattatc cgttccagta cttttgttgc cgaactgaaa gacaaacagc cgcaggccat
    45721 tgacgtgccg gttatcggcg gtcactctgg cgtcactatc ctgccgttgc tgtcccggat
    45781 tccgggcgtg agcttcaccg agcaggaagt ggccgatctg actaaacgta ttcagaatgc
    45841 gggcacagag gttgtggaag cgaaagccgg cggcgggtca gcaaccctgt ctatgggcca
    45901 ggcagccgca cgctttggtc tatctctggt tcgtgctttg cagggtgaaa gcggcgtggt
    45961 cgagtgcgct tatgtggaag gcgacggcaa gcacgctcgt ttctttgctc aaccgctgtt
    46021 gctgggcaaa aacggcgttg ccgagcgtaa agacatcggt acgttgagcg cgtttgaaca
    46081 gcaggctctg gttagcatgc tggataccct gaaacaggat atcgcgctgg gcgaagagtt
    46141 tgttaacaag aaataatcac cttcgtgtga caagttctgt tgataaggcc ggagtctatt
    46201 ctccggcctt tctttttccg gaagtattat tcggattgcg gatcagattg tggacggatc
    46261 agttttttgc gatcgagtag ttcttgcgtt tcaggatcat aatagcggct gggccatatt
    46321 tccgatggat gaatacccag cgcgtcggct attaaccatt cgcccttcgg ccacgggcga
    46381 gataaggcat tggccagcgt ggaagagctt aacccggcag cacgtgatac agcagcgagc
    46441 gttgtccctt tctttctcag tgccgcaata atatcggcgg gatgccagtc atttttcctt
    46501 gaattcataa tccttccctt attgctatta agacgacagc gtattaatgg tataactaac
    46561 ggctcatggt gaatggtttc gctaaccaaa agccattatt tggaaataat atagcaccaa
    46621 tttccttaat atttccaaat taatttccaa atggatctga ataggtaacg agtatcacta
    46681 tcgggatgaa aaggacatga aaaaagagtg gtttgcgacc agcgaattgg ttggtattgg
    46741 cggactccct aaatcgcggc aaggattgaa taagcgagcc cgagaagatg gttgggaaaa
    46801 gcgtcgccgt aaaggtgtac aaggacgagg ggtagaatat tctatccata gcttgcctca
    46861 gtctgttcag caaacactgc tgatacagga aacgtcaggt gaatattcgg caaagccgtc
    46921 agatatgctg tcagtctgga tccagattta ccatcagcta tctgtcccgg aacgggaaaa
    46981 actgattgcg tatatcatgc gcgaaggcgt gtcttccacg ttgaaacagc tgggtcttgc
    47041 caatacggca agtgcgactt tgataaaaga tttttctgat taagtgactc agccattccc
    47101 gattttctct attgcggaat ggctttttcc ccgcttcttc ctcaccttat ttcttgctgt
    47161 ggaactttcc tgaacacaat taatgctacc tttaacacca ttgcattagt ggtttgaata
    47221 aaattagtct attatatgga aacgtaattg ctgttttagt catctgattg cgtattcgta
    47281 tcaggaaaga gatgaaaggg agaatgatga tggaaaaggc atggtttacc accaatgaat
    47341 tgttaggcgt ggcagggttg ccgaaatctc gccaggggct caataaaaga gccaaggaga
    47401 atggctggga gaaacggcgt cgcaaaggcg ttcagggtaa aggcgtcgaa tacgccatct
    47461 ggagcttgcc gacagaggta aaaaccaccc tcatgcagga aactgcgccc gactacgccg
    47521 ggaaatcggc gactgttcaa gagcacacct gggtacagat ttaccaccag ctttctgcgg
    47581 aagagcgcac ccggttgatt gggcatattc tgcgcgaagg ggtgatggga atgctggccc
    47641 gcctggaaaa cgggccgcag gaatataaaa ataagggaga atgactcaga agtcgcgttg
    47701 tactgcgaga tgagccaggc cttcaagcgc ggtgcgaaaa tcactggcag gcaggcattg
    47761 aatagcggta atagccttgt cggcttcttc ttcggctctc tgtcgggtgt aagccagaga
    47821 gccgcaggat tgcatggccg ccagcacggg ctccagcaaa tggcgaccat taccttcttc
    47881 tatcgcctga cggatcatgg tgcgctgctc ttcgttgccg tgatgcatgg catgcagcaa
    47941 cggcaaggta ggcttgcctt cattcaggtc gtcgccggta tttttcccca gtgtttcgcc
    48001 gtcggcgctg taatcgagta aatcgtcaat cagctggaag gcggtgccga ggtaacggcc
    48061 gtattcctgt aaggcaagtt cctgctcgct gctggcgtcc gacaggatgg cggacgcctg
    48121 cgcagccgct tcgaacagcc gggccgtttt gctgtaaatt acccgcatgt aactgtcttc
    48181 ggtaatatcc ggatcgttgc agttcatgag ctggagcact tcgccttccg cgatcacgtt
    48241 aacggcatcg gacatcaccg acatgacgcg cagcgaggcc aggctggtca tcatctgaaa
    48301 agcacgagta taaatgaagt cgcctaccag cacactggcg gcattgccga acgcggcatt
    48361 tgccgtggct tttccccgac gcatgtcgga ttcgtcgacc acatcgtcgt gaagaagagt
    48421 agcggtgtgg ataaattcaa tcagcgcggc aatagtgatg tgtttgtcac cctggtagtt
    48481 cagcgctctg gcggttaata ccgcaatcat aggccggata cgcttgccgc caccgctgat
    48541 gatgtaattt cctaactgat tgatcaggac aacgtcggag ttgagctgat ccagtatggt
    48601 ctggttgacg gcggccatat cctgtgcgct taacgctgtg atttgctcta agttcattgt
    48661 ttctgccagc tgattgcttc tgtttctgcc gtgaaaatac tgatggtgtc ggcactgaaa
    48721 aggggaatgt taggcctgat tgtacttgaa aaatggcaca gataaacggc agttcatggg
    48781 ttgtatcctt tttcttcaca ttgattgatt ctaggcttgt catcagtagg ttttttgcgt
    48841 agaattcgcg ccctattgtg aatatttata gcgcgcttca catcattcaa agaagcacgc
    48901 ggaaagcgga gttttatatg tacgcggttt tccaaagtgg tggtaaacaa caccgagtaa
    48961 gcgaaggcca gaccgttcgc ttggaaaagc tggacatcgc aaccggtgaa gctattgagt
    49021 ttgaccaggt tctgatggtt gccaatggtg aagatgtcaa gatcggcgtt cctttcgtcg
    49081 atggcggcaa aatcaaggct gaagtcgttg ctcacggccg tggcgagaaa gttaaaatcg
    49141 ttaagtttcg tcgccgtaaa cattaccgta agcaggctgg ccaccgtcag tggttcactg
    49201 acgtgaaaat caccggcatc agcgcttaag tcttaggaga gcggattaat ggcacacaaa
    49261 aaagctggcg gttctactcg taacggccgc gactcagaaa gcaaacgtct tggcgtaaaa
    49321 cgcttcggcg gtgaatcagt tctggctggc agcatcatcg tccgtcagcg tggcaccaaa
    49381 ttccacgcag gcagcaacgt aggctgtggt aaagaccaca ccctgtttgc tctgtctgac
    49441 ggtaaagtca aattcgaagt taaaggcccg aacaaccgta aatttatcag catcgtcgct
    49501 gagtaatttc ccggtatcag gttgaatcaa aaagccctgc aacttgttgc agggcttttt
    49561 acatttacgc agcacaataa agaaatcgat aaaaagaaca ggtgatgtga tgaaacagaa
    49621 tgctgtcatc gggttttgtc tggcactgac taccgccata tgctgggggg cgttgccaat
    49681 cgcgatgaaa caggttctgg tggcgatgga gccttatact atcgtctggt atcgcttttt
    49741 gatcgcatcc gtcgggctgg ggattttcct gtacagcaaa ggcgcgttgc caacgtcgca
    49801 ggcatttgat catcagcgct ggtggatcct gctgttgatc gccaccggcg ggttgctggg
    49861 caatttcgtg ctgtttagtt cgtcgttgca atatctgagc cctacggcat cacaggtgat
    49921 cgggcagttg tcgacggtgg ggttgatggt tgccagcgtt gtgatcctca aggaaaagat
    49981 gcgcccgagc cagatcatcg gcgctggagt gctgatttgc ggattattga tgtttttcaa
    50041 caatagtctg gtcgagcttt ttacccggct gacggattac accttcggaa tattgctggg
    50101 agtggcggct tcctcggtat gggtggccta tggcgtggcg caaaaggtgt tgctgcgtcg
    50161 tctgacttcg caacagctgc tttttctgct gtatacgctc tgtgtactgt ttattacccc
    50221 actggcaaaa ccgggggtga ttttccaatt gactagctgg caactggcct gtttattgtt
    50281 ctgcggcgcg aacacgctgg tgggatacgg ggcgctggct gaggctatgg cgcgctggca
    50341 ggccgcgcag gtgagtacca tcattacttt aacaccgttg tttacgctgt ttttttcgga
    50401 tttattggca ttggcctggc ctgcggtatt tgcggcgccg gcactcgacc tgctggggta
    50461 tgtcggcgcc tttgtcgtag tgacaggcgc gatgttctct gcggttgggc atcgtctgat
    50521 cgcattaaaa cgcgacaaac gcccgatggt ttgatgaggt aggaataaga tgcgcggata
    50581 ccctgaacaa ggggtgatga agcgaatcag ggctgattat ttttaataca ggtgaaatcc
    50641 tttcgccaag caggtacaat cagcgccctt ttatcggaac agttctgatg cgtcggtttt
    50701 tcagtggcag gtgacatact gcggttatct gtcatcgacc caattcgttg agccaaagag
    50761 aaccaataaa ttattcaaac gcgtcggtca ttctctattg gttttttgcg gagacagttc
    50821 atgaagtttg tagatgaagc caccattctg gtcgtggcag gtgacggtgg caacggctgt
    50881 gtcagcttcc gtcgtgaaaa atatattccc aatggcgggc ctgacggcgg tgacggcggt
    50941 gacggcggcg atgtctacct gctggcggat gaaaacctca ataccctgat tgactaccgc
    51001 tttgagaaaa atttccgtgc cgaacgcggc cagaatggcc agagccgtga ctgcaccggc
    51061 aagcgtggca aagacatcac tattaaggtc cctgtcggta cgcgtgtgct ggataaaagc
    51121 acgggcgaag tactgggtga tatgacccgt aatcagcaga aactgatggt cgcgaaaggc
    51181 ggatggcacg ggctgggtaa tagccgcttc aaatcctccg tcaatcgcgc gccgcgacag
    51241 aaaaccaacg gtacgccggg cgaagagcgc gagttgatgt tggaactgct gctgctggcg
    51301 gatgtcggta tgctgggtct gccgaatgcc gggaaatcaa cgtttattcg cgcggtgtcg
    51361 gccgccaagc cgaaggtggc ggattatccg tttaccacgc tggtgccgag cctgggcgtg
    51421 gtgcgtatgg acagcgagaa gagcttcgtg gtggcggata tccccgggct tatcgagggc
    51481 gcatccgaag gcgctgggct ggggattcgt ttcctgaagc atctggagcg ctgccgtgtg
    51541 ctgctgcacc tgatcgatct ggcgccgatc gatgaatccg atccgatcga aaatgccaaa
    51601 gtgatcgtta atgaattgca gcaatacagc gcctctctgg cggaaaaacc gcgctggctg
    51661 gtgttcaaca aggttgatct gctggagaaa ggcgaagcgg aaaaacgcgc gaaagaaatc
    51721 gcggctgcgc ttggctggga aggtaaatat tacctgattt ccgcggctaa ccgggaaggg
    51781 gtaaacagcc tgtgctggga tgtaatgaat ttcctcaata ctcagccgaa agcgctgtcc
    51841 gaagtggaga acaaggcgcc ggagaaagtc gacttcatgt gggatgatta ccaccgcgaa
    51901 cagctggaag ccgctaaggc ggaagctgaa gaggagtggg atgacgactg ggatgaagaa
    51961 gacgacgaag gcgttgaaat tgtttaccag cgttaatcgc cataaggcca tctgagcgac
    52021 ggccgaaaag aaacttgctt gttagttgtg aatatttccc ttatctgttt atcagataag
    52081 ggaatttttt atcagtcggc taattgttct ggtatatatc tttgtaaacg cggctttcga
    52141 agcgaaccag cggaatgcga cgttctttct gatcttccgg cggaactgcg taactggaga
    52201 gatactgcac aaaggccatt cgctggccgc tggcggtggt gataaagccc gccagattgt
    52261 acactccttg cagcgcgccg gttttggctg agactttgcc atcaagtccg gcttcatgca
    52321 ggccggcacg atagcgtaat gtcccgtcat agcccgccaa tggcaacatc ttaatgtaat
    52381 tcaattcgtt atcgtgctga gcgatatatt gtagcacctg catcatggtt gccggtgcga
    52441 tcaggttatg tctggacagc cccgagccgt caacgatgat ggtattgccc aggtcgattc
    52501 cggctttctg acgcaggatc tgacgaacgg cgtcagcgcc ggcgcgccag gttccgggaa
    52561 ccttgaaacg ctcatgccca atagtgcgaa agacggtatc ggcaatcatg ttgtccgatt
    52621 ttttcagcat ggtggtcagc aattcatgca acggctctga ttcggtttgc gccagtacgg
    52681 tgccgtgagc gccaggcaac gattgccggc gcaggctgcc agcgatgcgg atatccgcct
    52741 gctgcagttc gtctttcacg atcgcgccgg cgtaactggc gccgtcttgt atggcgaacg
    52801 ccagcggcaa cggttcggca cgttgtgtca gacaaccagt aacggtaaag cggctgagtt
    52861 cacccggcac cacatccagc tcgcaatact gagcgtccgg cgaccctttc ggcagggtgc
    52921 gaacttcgct gaacatttgc accggataat aggacgcgac gcggatgaat gcgttatcgc
    52981 ctgccttggg agcgctatag agcgagatgg agaagcagtt tttgtcgaca atcgccgcgg
    53041 cgggcggcgc actgaaacac tgagtcatat cgttccaggg ccagccgggc gccttgtcgt
    53101 ggctggcgaa cacggatgtg tcgatcagta cgtcgccgct gatttcacga attccccgtt
    53161 tcttcagttc ctgtaccatg ttgtggagtt gctgtcgttt cagcgatgga tcgccgctaa
    53221 agcgcaccgc cagattgccg cgtaacaccc cgttggtgag tgtaccgctg ctttccatcg
    53281 tggtgacgaa acggtaatcc ggccccagtt gcaacaacgc cgccagcgcg gtgatgactt
    53341 tctgcgtact ggcgggcagc gccatctgct ggctgtggta atcgacagtc ggggtagatg
    53401 cgccgatttt ttgcaccacc agcgccagat tggctccatc gggcaaatat ttggtgtatt
    53461 cgtcaatggg gacggcgttg gcctgcaggg caactgcgca ggaaaaaccg gtcagaatcg
    53521 ataaaaaacg cataatctca attaagtaca gggtaacgtg gtggtcatac tacggcgcat
    53581 caagggataa agtaaacgat gaccctggtg gaactctggg gtaaaatgcg tatcaaaatg
    53641 caaaaacgtg tctgacctgg aaggaatgtt ccgggctagg ctgtttttgt ttaaattgtc
    53701 aggatgcact ggcatggaaa cattccgtcg caggtgattt atcacgtcag gatgacggta
    53761 acgtgagccg tacggatttt ttagaggtag tgacgatatg aaacaatttc cgatgacgtt
    53821 gcgtggtgct gaaaagttac gcgaagagct ggacttcctg aagatggtgc gccggcccga
    53881 aattattgcg gcgattgccg aggcgcgcga gcacggcgat ttgaaggaaa acgcagaata
    53941 ccatgccgct cgtgagcagc aaggattctg tgaaggccga attcaggaaa ttgaagccaa
    54001 actgtccaac gcccaggtta ttgatgttac caagatggcg gcgaatggcc gcgtgatctt
    54061 tggcgctacg gtaaccgtga tgaacgtgga cactgaggaa gaacagacct accgtattgt
    54121 gggtgacgac gaagccgact tcaaacagaa ccttatttcc gtcaactcgc cgattgctcg
    54181 ggggctgata ggcaaagaag gggacgatgt ggtgacgatc agcacgccgg gtggggtcgt
    54241 agagtacgaa atcctgaaag tggaatatct ctgattccgg ttgactggca agaccagtct
    54301 cgattgtaaa gaaaggaaaa aggccgatat cggccttttt tctcaccagc gggtcatgga
    54361 accttgctgg gaaacagggt aacctgaatc aaaaatgtta acgaggcagc acaatcttgc
    54421 gttcttttga cgcacgatag agcaccagag tgtggccgat gacctggaca ttactggcgc
    54481 cggtttcgcg cagaatggca tcgacaatca ggcccttggt ttcacgatcc tcagcggcga
    54541 ttttcacctt gatcagttcg tgatgttcca aagcctgctc gatttcagct agcacacctt
    54601 cagtgaggcc gttgttgccc agcataacga ctggctttaa cggatgagcc aagcctttca
    54661 ggtgctgttt ttgtttgtta ctcagattca ttgtcttttt tgcttaggtt gggattgaaa
    54721 acgggccatt ctaccgccat ctcatgatta tcaccaatcc agctataaag attggctgtc
    54781 gttgagacgt tttgcccgcc gcaggcactt aattaacact agttagaaaa atcatagttg
    54841 gaaaatcgat ggctaacaaa aagcgttctg caagttccac ccgctggttg caggaacact
    54901 ttagcgataa atatgtacag caggcgcaga aaaaagggct tcgctcgcgc gcttggttta
    54961 aacttgatga gatacaacag actgaccggc tgttcaaacc cggtatgacc gtggtggatc
    55021 ttggcgcggc gccaggcgga tggtctcagt atgttgtcag tcagaacggt ggaaaagggc
    55081 gcattatcgc gtgcgatctt ttaccgatgg atcctattgt tggagtcgat ttccttcaag
    55141 gggattttcg tgatgaatta gtgcttaaaa ccctgctgga gcgggttgga gccgaaaagg
    55201 ttcaggtggt gatgtccgac atggccccga acatgagcgg tactccggcg gtggatattc
    55261 ctcgcgccat gtatctggtt gaacttgcgc tggacatgtg tcgggatata ttagcgccgg
    55321 gcggcagttt cgtagtgaaa gtatttcagg gagtgggctt cgatgagtat ctgcgtgaga
    55381 ttcgctccct gtttgcgacg gtgaagattc gtaagccaga tgcctcgcga gcccggtccc
    55441 gtgaggtgta cattgtagcg acaggccgta aactgtagta ccctgacgct attttttaac
    55501 acagttgtaa tatgaggtta atcccttgag tgacatggcg aaaaacctga ttctctggtt
    55561 ggtcatcgcg gtagtgctga tgtccgtatt ccagagcttt gggcccagcg agtcgaatgg
    55621 ccgtagggtg gattattcaa cctttttgac tgaagtgaat caggatcagg ttcgtgaagc
    55681 gcgtatcaac gggcgcgaga ttaatgttgt caaaaaagac agcagccgct acaccacgta
    55741 cattcctgtc aacgatccta aactgctgga taaccttctg accaaaagtg tgaaagtggt
    55801 tggcgaaccg ccggaagaac caagtctgct ggcttcgatc ttcatttcct ggttcccgat
    55861 gctgttgctg attggtgtct ggattttctt catgcgccag atgcagggcg gcggcggcaa
    55921 aggcgccatg tcttttggta aaagcaaggc acggatgctg actgaagatc agattaaaac
    55981 tacgttcgcc gatgtggcgg gctgtgatga agccaaagaa gaagttgccg agttggtgga
    56041 gtacctgcgc gagccgagtc gctttcagaa actgggtggt aaaattccga aaggcgtact
    56101 gatggttggt cctccgggga ctggtaaaac cttgttggcg aaagccattg ccggtgaagc
    56161 caaagtgccg tttttcacca tttccggttc tgactttgtg gaaatgtttg tgggtgtcgg
    56221 tgcttctcgc gtgcgagaca tgttcgagca agccaagaaa gctgcgcctt gcatcatctt
    56281 tattgatgaa atcgacgccg taggccgcca gcgtggcgcg ggtctgggcg gtggtcatga
    56341 cgaacgcgag cagacgctga accagatgct ggttgagatg gatggttttg aaggcaacga
    56401 aggtatcatt gttatcgctg cgactaaccg tcctgacgtg ctggatccgg cgctgctgcg
    56461 tcctggtcgt tttgaccgtc aggtggtggt tggtttgccg gatgtccgtg gtcgtgaaca
    56521 gattctgaaa gtccatatgc gtcgcgtacc gctgtcgccg gatattgatg cttccgttat
    56581 cgcgcgcggc acgccgggtt tttccggcgc agatttggct aacctggtga acgaggcggc
    56641 gttgtttgcg gctcgcggca accgtcgggt ggtttcgatg gtggagttcg agaaagccaa
    56701 ggacaaaatc atgatggggg cggaacgccg ctctatggtg atgaccgaag cacagaaaga
    56761 atccaccgct tatcacgagg ccggccatgc gattattggc cgtttggtgc cggaacacga
    56821 tccggtacac aaggtgacga tcattccgcg cggccgtgct ttaggtgtga ctttcttcct
    56881 gcccgagggg gatgcgatca gcgccagccg tcagaaactg gaaagccaga tttctacgct
    56941 gtacggcggc cgtctggctg aagaaatcat ctacggtttc gagcatgttt ctaccggcgc
    57001 ttccaacgac atcaaagtgg ccacatccat cgcccgcaac atggtgacgc aatggggttt
    57061 ttcggaaaag ttgggaccgt tgctgtatgc ggaagaagag ggtgaagtgt tcctcggtcg
    57121 ttctgtcgcc aaagccaagc atatgtcgga tgaaacggcg cgtatcatcg atcaggaagt
    57181 taaggcgctg attgagcgta attaccagcg tgctcgcgaa ttgctgatgg ctaatatgga
    57241 tattctgcat tcgatgaagg acgcgttgat gaagtatgag actatcgatg cgccgcaaat
    57301 cgacgatctg atgtcgcgta aagacgttcg tccgcccgct ggttgggagg aaccgacttc
    57361 gggtaatacc ccttcgtcgt ctgacaatgg cggggccccc aaggcaccga cgccggcgga
    57421 cgagcctcac acgccgacac cgggtaatac catgtctggg cccttgaacg acaagtaatg
    57481 gtatgacggc tccaggcggg ccatagttcc ccttcaaccc cggcttgccg gggtttttta
    57541 ctccgggaag gcatgctggt tggacgaatt taagaagcaa aacatgaaac tgaacgctcg
    57601 cggattgacg ttggatctca cctgccccca gattatgggg attttgaatg taaccccgga
    57661 ttctttctct gacggcggta aacacaacac gctgaacact gctttgatcc atgccgagca
    57721 gatgatttct gcaggcgcca cgttcattga tgtggggggg gagtctaccc ggccgggcgc
    57781 agatgaagtc agtaccaatg aagagctgga acgggtcgtg ccggtggtgg aagcgttggc
    57841 gcaacgcttt gaaacctgga tttcagtgga tacatccaag ccagaagtga ttaccgccag
    57901 cgcgcaggct ggcgcacacc tgatcaacga tattcgggcg cttagggaac cgggagcgct
    57961 ggaggcggcg gcggcaacag gccttcctgt atgcctgatg catatgcagg gattgccaag
    58021 aaccatgcaa catacgccgc attatgacga cgtggtaggt gaggtttcgg cgttttttga
    58081 gcatcatatt gcccgttgtg tcgcagccgg tattccgcgc gaccagttac tgctggatcc
    58141 ggggttcggc ttcggcaaga atctacagca taattatcgg ttgctggggc acttggaagc
    58201 attacatcgc ttcggtttgc cgctgctggt cggtatgtcc agaaaaacca tgattgggca
    58261 attgctgggt gttccgccgc ttgagcgggt tcatggcagc gtcgcatgcg cggttattgc
    58321 cgcaatgaag ggcgcccata ttatccgtgt tcatgatgtg aaagcgacgg tggatgcaat
    58381 acgtgtagtc gaagcaactc tatcagcgaa ggaataacaa caattatgag tagccgcaaa
    58441 tattttggca ctgacggtat tcggggcaag gtgggtgatc tgccgattac gcctgatttt
    58501 gtattgaagc tgggatgggc tgccggcaaa gttctggcgc gtcatggttc cagaaaaatt
    58561 attattggta aagatacccg tatttccggc tatatgctgg agtccgcact tgaggccggg
    58621 ctggcggcgg ctggtttgtc cgcctcgttt accggaccta tgccaacccc ggcggtggct
    58681 tatctgaccc gcacctttcg tgctgaagcc gggatcgtaa tttcggcgtc acataacccc
    58741 tactacgaca acggcatcaa gttcttttcg attgacggca ccaagctgcc ggacgaagtg
    58801 gaagaggcga tcgaagcgga aatggaaaaa acattgacct gcgtcgaatc cgccgaattg
    58861 ggcaaggcga accgtatcgt tgatgctgcc gggcgctata tcgaattttg taaaggcacg
    58921 tttcccagtg aactgagcct cagcggcctt aaaatcgtgg tggattgcgc aaatggcgct
    58981 acctatcata ttgcacccag cgtattgcgt gaattgggcg cccaggtaat tgccattggc
    59041 tgtgaacctg atggcatgaa catcaatgaa cagtgcgggg ctacagatgt cacgcaactg
    59101 caggcgcggg tactgtctga aaaagcagat gtcggtctgg cgtttgatgg tgatggcgat
    59161 cgcctgatta tggtcgatca ccagggcaac aaagtcgatg gcgatcagat cctgtacatt
    59221 atcgcgcgcg aagcgttgcg tcagggtcaa ctgcgcggtg gtgcggtcgg tacattgatg
    59281 agtaacatgg ggctggagct ggcgttaaaa cagttagggg tcccgtttgc ccgagccaag
    59341 gtgggagacc gctatgtgct ggagctgatg cagtcaaaag gctggcgtct gggcgctgaa
    59401 aactcaggcc acgttatcct gttggataaa actactaccg gtgatggcgt tatcgcaggt
    59461 ttgcaggtac tgacagctat agtccgcaac catatgagcc tgcatgacct gtgcagcggt
    59521 atgaaactct ttccgcaaat actggtcaat gtgcattttt caggggaagg cgacccgctg
    59581 gaaagcgagt cggtgaaaca ggccacacaa gcggtggaag agcaattggc cggtcgcggc
    59641 cgggtactgc tgcgcaagtc cggtactgaa cccttgatcc gggtaatggt ggaaggggaa
    59701 gacgaagcga tggtgatgca gatggcacac cgaattgccg atgcggtaaa agcggcaggt
    59761 taagcggcag aataatgcat cgaccgtgtg acaggcagcg aatgcgcgtc acacggcatg
    59821 atagcgtgaa tgctgtgtaa tcaagtcggc tagtcgctct ctggtctttc tttcccggtc
    59881 gctgtttttt tcctcaatca gtgggttggc gccaaattac ccttgcgtac gcccagtgct
    59941 ttagttagta ttcagacccg ctttatgggg gagttatctc tccttatacg ggttgtcgcg
    60001 ggtaagccgc aagaattagc gatgcctcgc caggtggcgg ggataaataa tgggtacgac
    60061 tatgtacgaa gctcttctgg taattttcct gattgtggcg attggcctgg ttggtcttat
    60121 catgctgcag caaggtaaag gtgcagatat gggagcgtcg ttcggagcag gggcttccgc
    60181 taccttgttt ggttcaagcg gatccggtaa tttcatgacc cgaatgacgg cgctgtttgc
    60241 cacgctgttt ttcgtactca gcctgattct ggggaacatg agttccaacc acagcaagca
    60301 aggcagcgag tgggaaaacc tgaatcagcc ggctgcgccc gaaaaagcag agcagtcaaa
    60361 agcaccggct gcaccgtcaa gcgatattcc taaataatcg cagacgtttc atcggcgggt
    60421 gaatgccgct gatgataaaa acagttgtga tgccgaggtg gtggaattgg tagacacgct
    60481 accttgaggt ggtagtgccc gattgggctt acgggttcaa gtcccgtcct cggtaccaat
    60541 cctatagata acttgcattt tcgaagttgt cagcgtagta tttgccacgt tttcggacgc
    60601 ggggtggagc agcttggtag ctcgtcgggc tcataacccg aaggtcgtcg gttcaaatcc
    60661 ggcccccgca accacttaac ttcccgaaag agtttttttt caaataaact gtattgtatc
    60721 aagcgcgtta tctacggtga attctgaaag aatacttgat ggtagttatg ccgcagtagt
    60781 ttgcggtaaa tagggtccag ttgcacaaag ccccgatata tcgg
//
