# Supplementary material for: May the Phage be With You? Prophage-Like Elements in the Genomes of Soft Rot Pectobacteriaceae: Pectobacterium spp. and Dickeya spp
Source: Front Microbiol. 2019 Feb 14;10:138. doi: 10.3389/fmicb.2019.00138 (PMC6385640; doi:10.3389/fmicb.2019.00138)
Supplement: Supplementary file 2 [file Data_Sheet_2.ZIP › Supplementary_prophagesGENBANK_files/Genbank FILES _SRP_prophages/phiDdi5.gb]

LOCUS       Exported               66828 bp ds-DNA     linear   UNK 02-AUG-2018
DEFINITION  phiDdi5.
ACCESSION   .
VERSION     .
KEYWORDS    .
SOURCE      phiDdi5
  ORGANISM  phiDdi5
REFERENCE   1  (bases 1 to 66828)
  AUTHORS   .
  TITLE     Direct Submission
  JOURNAL   Exported Aug 2, 2018 from SnapGene Viewer 4.2.3
            http://www.snapgene.com
FEATURES             Location/Qualifiers
     source          1..66828
                     /organism="prophage phiDdi5"
                     /mol_type="genomic DNA"
                     /note="/genome_id=6666666.356836"
                     /note="/genome_md5="
                     /note="/project=robertczajkowski_6666666"
                     /db_xref="taxon:6666666"
     CDS             complement(267..707)
                     /codon_start=1
                     /product="Phage integrase"
                     /label=Phage integrase
                     /db_xref="SEED:fig|6666666.356836.peg.1"
                     /translation="MAKIAKKLTDTEIKNTKPAEKEINLFDGDGLMLRIAPLSVGGKKN
                     WYFRYAVPVTKKRTKMSLGTYPHLTLAKARTLRDEYLSLLANGIDPQTHNNDKANALKD
                     ATEHTLKAVAKKWLDEKVNPLVSHKIMQKTSGEASNEISSPV"
     CDS             1009..1554
                     /codon_start=1
                     /product="hypothetical protein"
                     /label=hypothetical protein
                     /db_xref="SEED:fig|6666666.356836.peg.2"
                     /translation="MDRITAIERLNAFDKQGRYVFTSRDLAKIFHEDRPRAFNAGLTRL
                     VKDGILTRAIRGVYVYNHAKSKDAYTLERIVLALRRGEYNYLSLESALSEYGVISQIPI
                     GRITVMTTGRSEEHKTPFGVIEFTHTKRPPEQILQDTYLGNSPLRQATKQTAVRDLRRV
                     GRNTHLIDESELYHESES"
     CDS             1538..2455
                     /codon_start=1
                     /product="hypothetical protein"
                     /label=hypothetical protein
                     /db_xref="SEED:fig|6666666.356836.peg.3"
                     /translation="MNQKVNFAELVSKAMESAELEGLRNVVEKELLHYDILYCLDSAGL
                     LEQLTFQGGTSLRLCHGGNRFSEDLDFAGGIAFSGADLKNMKACIEDYLGNRYGLEVNV
                     KEPNELRNEPGYEEVRIDKWQVSVTTAPEKRDMPKQRVKIEIANIPAYTRMPMALKRNY
                     DVLPDGYSDTLVMCETLNEVMCDKLVSLVATTKYIRYRDVWDLPWLIQQNATYDLDLIR
                     KKIQDYRIPNYDELLAHRIQSIEQIVGDGRFSAEMRRFLPQAVFDRTLGREAFSQYLSG
                     ELKTLLSTLQQELNGQGGKAPFIM"
     CDS             complement(2984..5308)
                     /codon_start=1
                     /product="DNA primase (EC 2.7.7.-), phage related"
                     /label=DNA primase
                     /db_xref="SEED:fig|6666666.356836.peg.4"
                     /translation="MAQPTVTQAVKRASGHWPQLLPLLGISVDAAGRHSACPVCGGKDR
                     FRFDNKEERGTWFCNQCGAGDGLNLVEKALNLTPTDAALKVSALLGTLPDSPAASTSDD
                     DDNDAARQRAAVQAQAKIKETVTQSGNAYLSAKGWPDVEVLTLQGKPLRMGGIVYQSGD
                     VLVPLTTHDGEVVNIQLINAQGDKRTLKGGQVKGTFYCFSGKHTTVIWLAEGYATGLTL
                     YQLTGDTVYVALSANNLSSLARELKTRHPAATLLIAADRDENGTGQSKAGQAASAVHGR
                     VALPPIFGDWNDVYRREGADVTRHYLTEFIQPEKASPFESLGEAEFKAMSASEKAEKIR
                     DHYRNTLAIDAFGETFFQYQNGAWKALPYRLLSRDIAVLFQKIQAPFTASSIGSVLDTL
                     KLIIPMQAKPQRRLIGFRNGVFDTVSGEFKPHRRENGLHTVNDVDYTPLKAGENLADNA
                     PHFWRWLTRAAGHNEDKQARILAALFMVLANCYDWQLFLEVTGPGGSGKSILAEIATML
                     SGEDNTTAATINTIESSRERASLIGFSFIVLPDQEKWSGDGAGIKAITGGDAVMVDPKY
                     RDAYSTRIPAVILAVNNTPMRFSDRSGGVSRRRVIIHFSEPIPASERDPKLKEKIRAEL
                     AVIVRHLMKRFADPNNARTLLQAQQHSAEALEIKRQADPLVDFCGYLQAHSGTTGLYMG
                     NANITPRNPRKYLYHAYLSFMESHGHQKPISLTAFGKVLPNIMSEYGLVYLKGRTKQGI
                     QTNLELKGESDADWLPKCDRA"
     CDS             complement(5319..5531)
                     /codon_start=1
                     /product="hypothetical protein"
                     /label=hypothetical protein
                     /db_xref="SEED:fig|6666666.356836.peg.5"
                     /translation="MFDVTPLTAEEITDQCRALTYAVIELDNPMAKEVLLFVLAERLEV
                     LSATLDMPDAIDNLNDPGQTDSTLH"
     CDS             complement(5524..5721)
                     /codon_start=1
                     /product="hypothetical protein"
                     /label=hypothetical protein
                     /db_xref="SEED:fig|6666666.356836.peg.6"
                     /translation="MATTPTPSHPQFTFLFLAVRRAELRALPHREAVIAPDEISARRLL
                     ARDYVLSFAGRLPLRGARHV"
     CDS             complement(6076..6222)
                     /codon_start=1
                     /product="hypothetical protein"
                     /label=hypothetical protein
                     /db_xref="SEED:fig|6666666.356836.peg.7"
                     /translation="MITLAIAGQSTTLDERETLSLCDQLLAAASDSPRHYCTSRAGDAL
                     TNC"
     CDS             complement(6219..6404)
                     /codon_start=1
                     /product="Transcriptional regulator, AlpA like"
                     /label=Transcriptional regulator, AlpA like
                     /db_xref="SEED:fig|6666666.356836.peg.8"
                     /translation="MRLPEVLHVTGISRSTLYELSSRNAFPARVPLGGKNVAWVESEIH
                     HWVAERIAARQQENHA"
     CDS             6466..6597
                     /codon_start=1
                     /product="hypothetical protein"
                     /label=hypothetical protein
                     /db_xref="SEED:fig|6666666.356836.peg.9"
                     /translation="MADNIGRYLVNVRPALAGWRWIYLVARYYVNICSGGNKGKKGD"
     CDS             6597..6722
                     /codon_start=1
                     /product="hypothetical protein"
                     /label=hypothetical protein
                     /db_xref="SEED:fig|6666666.356836.peg.10"
                     /translation="MDKKRSGTTVNSQRCPIFANISQFYTFDKNQIIGGYLYGLN"
     CDS             7023..7754
                     /codon_start=1
                     /product="FIG070121: Phage capsid and scaffold protein"
                     /label=FIG070121: Phage capsid and scaffold protein
                     /db_xref="SEED:fig|6666666.356836.peg.11"
                     /translation="MSQTTPQSDIPDVLKKMADNYLKAREAHLANASELDNIMTAMRRA
                     KAQQTATEAENQLSDTEWRARFLKARGEMTEELKALQLQRLAQRELAHEYDGLLAQLEI
                     DQLRQQATCHASAKACCNAHASALRDYAEWELSQALDRISTALIRAIKLKQHMLGITTS
                     EFTEGLSYQKPDKVVMEQVVNCLIAKSNNYRFEMDNEPVLSVLGLDSPSLPHADFPPVA
                     NPIARHRAGFFLRLFLWLALF"
     CDS             7786..7971
                     /codon_start=1
                     /product="hypothetical protein"
                     /label=hypothetical protein
                     /db_xref="SEED:fig|6666666.356836.peg.12"
                     /translation="MKLTSQLALSRQYWHGLSDFMQLHENCYIKWVGVAGAQLRAGSFS
                     VYGCDWYHFYIQMNYR"
     CDS             8377..8868
                     /codon_start=1
                     /product="hypothetical protein"
                     /label=hypothetical protein
                     /db_xref="SEED:fig|6666666.356836.peg.13"
                     /translation="MIEGPTEEIISRAFFQEFPPKKTIFVLNCGTVNNIPFYQKIFSRF
                     NIKYHVICDTDKAKIVEYDQAGNPSFDSGIQKTISDQYRSDYDVTNGNIGLLRVHNVTF
                     EPAHQNVDIPEILRFADFGDRSKPFNANLYWKNVLKPNIAHQDINKVPIIRYLKEIMAH
                     "
     CDS             complement(8903..10090)
                     /codon_start=1
                     /product="Phage integrase"
                     /label=Phage integrase
                     /db_xref="SEED:fig|6666666.356836.peg.14"
                     /translation="MARTTRPLTHIEVQKAKAADKDLTLHDGNGLFLLVKTTGKKLWRF
                     RYQKPTTGQRTMIGFGAYPALSLADVRAMRDEKLSLLAKGIDPQEKVAKEVEEAQIAVE
                     SLFINVARSWFTLKQATVSTDHAKDIWRSLEKDVLPAIENIPVQQIKARTLIQALEPIK
                     ARGALETVRRLVQRINEIMVYAVNTGLIDANPASGIGMAFERPKKQHMPTIRPEELPAL
                     MRTIAMSNLSIPTRCLLEWQLLTLIRPAEASATAWAEIDIEKKTWSIPAERMKAKRDHI
                     VPLSEQALELLDIMRPISGNRDYVFPSRNDPKKPMNSQTANAALKRIGYGGKLVAHGLR
                     SIASTAMNEAGFNPDVIESALAHCDKNEVRRAYNRSTYLEQRKELMDWWGLGVHK"
     CDS             complement(10368..11426)
                     /codon_start=1
                     /product="Phage integrase"
                     /label=Phage integrase
                     /db_xref="SEED:fig|6666666.356836.peg.15"
                     /translation="MCECYPFGREGKRVRKQFATKGEALAFERFTMEESENKPWLGEKA
                     DNRSLREIIDLWFSLYGRTLADPKRMMAKLDIICTGLGNPKARELSAADFAHYRELRLA
                     GQMTDASGIPLSVVKPRTVNLEQRNLSAVFGTLKKLGHWDAPNPLSGLPTFKIAQQELA
                     FLAPNEIKRVLDACAESANPHLLLVTKICLATGARWSEAEGLSGQQVTPYRITYTRTKG
                     KKNRTVPISRELYDEIPRKSGKLFSPCRKTFERAINRTGIQLPDGQCTHVLRHTFASHF
                     MMNGGNILVLRDILGHADIKMTMIYAHFAPDHLEDAITKNPLNGLNWSPKNGGKLAAAN
                     GNQAFSSPLITK"
     CDS             complement(11655..12311)
                     /codon_start=1
                     /product="Repressor protein CI"
                     /label=Repressor protein CI
                     /db_xref="SEED:fig|6666666.356836.peg.16"
                     /translation="MNCDQSTFCVQAKFTITFGFSQTKSIHLVNFMDFGTGAKAAIERL
                     VEAYGFKNRQALCDHLGVSKSTLANRYMRDSFPADWVIQAALETGVSLRWLATGEGPKF
                     DDARNDVIAIPRQKLIDGKLYDSNYYMFDKAFLSDGLKDPVVILDGDITYIADRQFDEV
                     VDGKWLVEIEGRTSIRDLTRIPVGKVRVSGAGAEFDCGLGDIQIIAECKGFYKGL"
     CDS             12348..12569
                     /codon_start=1
                     /product="hypothetical protein"
                     /label=hypothetical protein
                     /db_xref="SEED:fig|6666666.356836.peg.17"
                     /translation="MRPQISITLAVPSVSIEKYSELTGLSIDTINGMLADGRLTRHRLR
                     KDKKREKVMINIAAMTVDALADCDISLN"
     CDS             12602..13111
                     /codon_start=1
                     /product="Transcriptional regulator"
                     /label=Transcriptional regulator
                     /db_xref="SEED:fig|6666666.356836.peg.18"
                     /translation="MFDYQITKQTHFDEACRAFSLRHNLAELARTAGMNQQILRNKLNP
                     DQPHKLTCEELLTLTDITEDATLIDGLLAQLNCLPAVPVNEARAERLTAYVLQATAAVG
                     KVAAESVSDERMTQTRRHSLMSTISDGVRYLSLIGLTVQSRIQANPAMASTLDALSGLG
                     ASLTIG"
     CDS             13512..13841
                     /codon_start=1
                     /product="hypothetical protein"
                     /label=hypothetical protein
                     /db_xref="SEED:fig|6666666.356836.peg.19"
                     /translation="MSQSVDHQKWIQRCRDIVFKGESRAQSFWERAALDTREIILFSAK
                     PKLKSRHVNYSWHQFTAEERAAIWSAIKRIRAICDETALFGPDDFLKTSNQNGTPNQPN
                     PSPIH"
     CDS             13986..14207
                     /codon_start=1
                     /product="hypothetical protein"
                     /label=hypothetical protein
                     /db_xref="SEED:fig|6666666.356836.peg.20"
                     /translation="MKNAEVKTMTVAADGALIELLNKARLEERKDQHLSFSLRLAALAI
                     RAQQRDLSAAELVELMRQEFVLPEKRKP"
     CDS             14207..14437
                     /codon_start=1
                     /product="hypothetical protein"
                     /label=hypothetical protein
                     /db_xref="SEED:fig|6666666.356836.peg.21"
                     /translation="MIATKLKPMNAAADGALIELLNKARLEERKDQHLSFSLRLAALAV
                     RAQQRDLSAAEVVELIRQESERFEHSAQGLS"
     CDS             14437..14712
                     /codon_start=1
                     /product="Phage protein"
                     /label=Phage protein
                     /db_xref="SEED:fig|6666666.356836.peg.22"
                     /translation="MDSMDMAQEREAFIRETQIQQARQQSGCAVSAFVCESCDAPIPEA
                     RRVAVPGVRLCVYCQGDAELKNKHYNVLSTPLRSCTDGQQYQGERQ"
     CDS             14681..14911
                     /codon_start=1
                     /product="hypothetical protein"
                     /label=hypothetical protein
                     /db_xref="SEED:fig|6666666.356836.peg.23"
                     /translation="MANSIRENVSDELLREICNGSPFTGAFENEVVEMARELIEFRTAA
                     ARDMQKLADLERAVEVLSHKVGSVSISRGAL"
     CDS             14908..15030
                     /codon_start=1
                     /product="hypothetical protein"
                     /label=hypothetical protein
                     /db_xref="SEED:fig|6666666.356836.peg.24"
                     /translation="MSIIATPLKWVGSKARVMDILREHLPAGDRLVGPRDGYPA"
     CDS             15014..15427
                     /codon_start=1
                     /product="Methyl-directed repair DNA adenine methylase (EC 
                     2.1.1.72)"
                     /EC_number="2.1.1.72"
                     /label=Methyl-directed repair DNA adenine methylase
                     /db_xref="SEED:fig|6666666.356836.peg.25"
                     /db_xref="GO:0009007"
                     /translation="MDILREHLPAGDRLVEPFAGSCAVMMNTDYPEYLIADINPDLINL
                     YQVIKEDLKDFIDTAEGLFRTANTAESYYRFRQVFNRSKENRITSAALFLYLNRHGYRG
                     VCRYNRAGGFNVPYGHYASPYFPHQLSHRWFHP"
     CDS             15627..15773
                     /codon_start=1
                     /product="hypothetical protein"
                     /label=hypothetical protein
                     /db_xref="SEED:fig|6666666.356836.peg.26"
                     /translation="MPVASNIAKVCDGCGYEGGGHCPDCGPVMGDATYQEMVASGALDA
                     DPF"
     CDS             15773..16063
                     /codon_start=1
                     /product="Cytosine methylase, phage-associated"
                     /label=Cytosine methylase, phage-associated
                     /db_xref="SEED:fig|6666666.356836.peg.27"
                     /translation="MQPLAYYNEIDPFAAQWLRNLIDAGHIAPGIVDTRSIEDVTPNDL
                     KGFSQHHFFAGIGVWSYALRRAGWPDGQPVWTGSCPCQPFSAAGKKKRVCR"
     CDS             16598..17239
                     /codon_start=1
                     /product="Methyl-directed repair DNA adenine methylase (EC 
                     2.1.1.72)"
                     /EC_number="2.1.1.72"
                     /label=Methyl-directed repair DNA adenine methylase
                     /db_xref="SEED:fig|6666666.356836.peg.28"
                     /db_xref="GO:0009007"
                     /translation="MTDLQIPEHNGAKVTLSGNDSESSFTASGRYLTAAKRNRITAAAL
                     WLYLNRQGYRGVCRYNRAGGFNVPYGNYASPYFPLAEIQAFAEKARRAKFICAAFGETL
                     QLIRTGDVVYCDPPYIPQTPTASFTSYHTDGFTHNDQYDLCSALSRLAERGIPVIASNS
                     DTHHAHSLYHRFDICRFTAPRSVGVAAGESKQAGEIIAKRLPVHGQRGAA"
     CDS             17239..18153
                     /codon_start=1
                     /product="Modification methylase ScrFIA (EC 2.1.1.37)"
                     /EC_number="2.1.1.37"
                     /label=Modification methylase ScrFIA
                     /db_xref="SEED:fig|6666666.356836.peg.29"
                     /translation="MRAIDLFAGFGGSSTGARMAGVHVVWAANHWPAAVEYHRLNHPDA
                     IHVCQDLHQADWSSVPAHDLMMASPCCQGHSRARGKAAGNPQHDASRSTAWAVVSAAEY
                     HKPSAVIVENVPEFLNWALYPAWAAAMAALGYALSPHIVDCADLGVPQNRVRLFLICTR
                     SRSPLLLDLPRIGHVPAASFIDFEGGKWSPVNRPGRAISTLERIENGRQQFGDRFVFSY
                     YGNTKTGRSLSRPIGTITTRDRWAIVDGDRMRMMTKREVLAAMSFSSSYITPDSHRLTV
                     NMAGNAVPPVAMCRVVGAIGGCL"
     CDS             18150..18437
                     /codon_start=1
                     /product="Phage protein"
                     /label=Phage protein
                     /db_xref="SEED:fig|6666666.356836.peg.30"
                     /translation="MSILQLAVMGEYFAAMKAGLKPFEYRLDNAYWRRRLIGRDYEQLV
                     ITWGYPARSDMSRRLILPWLGYEMQTITHPHFGDKPVNVFAIRISDGVCE"
     CDS             18434..19345
                     /codon_start=1
                     /product="Phage replication protein # Replication gene A 
                     protein"
                     /label=Phage replication protein # Replication gene A
                     /db_xref="SEED:fig|6666666.356836.peg.31"
                     /translation="MTDLQILEHNGAYHAVREWQREQFSPGEPAGLSFVERSLWHLNKI
                     DHDWRQQYLAGMPDYLAKYFGQRYEKLFTSDEHKGRRRANTFLLRTLGKSVLPRLRTVT
                     ERYQTQQRAAGDLPFPFYDDLEKLPVYDRDNIRALSQQVADFMAASLRDYTENRIRNTG
                     ELTDRYITLLSFRHLGLLTLQAGTQPPYWAQFTKGRHPLSTEKAESGLLRMMSPEWWRA
                     RLKRRRDIQREHMAIAVGQVQKAASPYVSRSTLDEWKEQKRRNREFFKAFELEDEEGNR
                     VSLDDMVNASNANPAPRVFQGV"
     CDS             19299..19883
                     /codon_start=1
                     /product="Putative phage protein"
                     /label=Putative phage protein
                     /db_xref="SEED:fig|6666666.356836.peg.32"
                     /translation="MPATPTQRREFFKAFELEDEEGNRVSLDDKVNASNANPAIRRCEL
                     MVRMRGFEDLAQEMGCAGEFYTITAPSRYHAVHSGGGFVEQWSGASPRDTQKYLCGVWA
                     RIRAELSREEISVFGFRVVEPHHDGTPHWHLLLFMRPEHIEQVRDILAYHARREDADEL
                     NSEKAQKARFHYEPIDPEKGSAVTSLSTRVN"
     CDS             20102..20233
                     /codon_start=1
                     /product="hypothetical protein"
                     /label=hypothetical protein
                     /db_xref="SEED:fig|6666666.356836.peg.33"
                     /translation="MPALASTQKQLRDIRAHHARREDADELNREKRAKSPRPLRATS"
     CDS             20267..20575
                     /codon_start=1
                     /product="hypothetical protein"
                     /label=hypothetical protein
                     /db_xref="SEED:fig|6666666.356836.peg.34"
                     /translation="MRPKHIEQVRDIMAYHARREDADELNSEKAQKARFHYGRLNRKKA
                     APRVISPSTSARILMATHWMARPTRKPGKTYATWQKRYQRGHHAGVSGSFSKSVARR"
     CDS             20630..21196
                     /codon_start=1
                     /product="Phage replication protein # Replication gene A 
                     protein"
                     /label=Phage replication protein # Replication gene A
                     /db_xref="SEED:fig|6666666.356836.peg.35"
                     /translation="MTVYRELRRLGDKQLDNAAMDAVLAAADVGDWAAYTQAQGGPLVS
                     RDALVVRLSYEVTERANQYAEDVQKVQGVYSPLLGAHSAIITRTVEWKIVPKQAAASAG
                     AGVSGGPAAAWSSVNNCTPGLRRRLSELLRLRGFPPDPVLVDVLIRGGNLAMSEGRALK
                     MVNGRLEEVRKTGDCELWTGWNWES"
     CDS             21338..22033
                     /codon_start=1
                     /product="Methyltransferase"
                     /label=Methyltransferase
                     /db_xref="SEED:fig|6666666.356836.peg.36"
                     /translation="MGYLGSKAASGAYQKIIAAMPPHDTYIETHLGSGAVMVRKPAAVR
                     SVGIDIDGEALRHFSIGHSIGAGGLQHVTLIDADAVEYLREFDFASAGQVLIYADPPYL
                     PETRTSRARYRFEYTVEQHRELIAVLRSVPASVMISGYPSALYDELLGDWRSITFQVMT
                     RGGVRTEQLWVNYPEGAAYDATFAGENYVDRQRIKRKAQRWADNYRAMSRPERLAIMSA
                     LQGVDASDC"
     CDS             22228..22353
                     /codon_start=1
                     /product="hypothetical protein"
                     /label=hypothetical protein
                     /db_xref="SEED:fig|6666666.356836.peg.37"
                     /translation="MLAKLTEHGGADEHDKDVALAWINEMVNEFVSREVNGFERE"
     CDS             22734..23006
                     /codon_start=1
                     /product="hypothetical protein"
                     /label=hypothetical protein
                     /db_xref="SEED:fig|6666666.356836.peg.38"
                     /translation="MVAGDEVYNSAPYKKEGVMSSIAALRLGNPVERLARVLKENQDKL
                     NLSKDGFVSVDLSNEEALKAIRDQMDKLEGIKTSTVKAKHYYRTR"
     CDS             complement(22975..23097)
                     /codon_start=1
                     /product="hypothetical protein"
                     /label=hypothetical protein
                     /db_xref="SEED:fig|6666666.356836.peg.39"
                     /translation="MERLYLYRVESDRFTYKKPLTKITAKSNVAIIGFCNNVLL"
     CDS             23138..23848
                     /codon_start=1
                     /product="hypothetical protein; Hypothetical transmembrane 
                     protein"
                     /label=hypothetical protein
                     /db_xref="SEED:fig|6666666.356836.peg.40"
                     /translation="MFFLAGGFLTFALNISGGFRWLSNALNLTPDSFNGMLSATTDRSQ
                     RINEIKQIAWVVISIVLAALFGWLNKQRTSKGDRRWDALAKAVGNNAFESLLMEASARQ
                     FPIIATLSSRKIYVGLVTCPALENGLSEHLEILPMLSGYRDKDDLTISITTNYHQHYLE
                     SGIIGGMSRLNIQDFRVLIPKDEVETISFFDTETYNKFKEDEARDRKNCRNLGGKKPST
                     RRRRTTDDAEQDSA"
     CDS             complement(24103..25167)
                     /codon_start=1
                     /product="Phage-related capsid packaging protein"
                     /label=Phage-related capsid packaging protein
                     /db_xref="SEED:fig|6666666.356836.peg.41"
                     /translation="MAKRRKPQPPATLAAAPTGPAGVEAFSFGDPIPVLDRRELLDYIE
                     CVRTDRWYEPPVSFEGLARTFRAAVHHSSPIFVKRNILTSTFIPHPLLSQQAFSRFVQD
                     YLVFGNAYLEMRTNRLGGLLSLQPTLAKYTRRGLDLDTYWFARYGYNSQPYAFEPGSVF
                     HLMEPDLGQEIYGLPEYLSAIPSALLNESATLFRRKYYLNGSHAGFILYMSDGQQNQED
                     VNNIRQAMKSAKGPGNFRNLFLYSPNGKPDSVKVIPVSEVAAKDEFLNIKNVSRDDMLA
                     AHRIPPQMMGIIPNNVGGFGDVGKASKVFVRNELMPLQRQILALNEWAGIEVIRFDSYQ
                     LDVEDGNLSVSISK"
     CDS             complement(25167..26981)
                     /codon_start=1
                     /product="Phage terminase, ATPase subunit"
                     /label=Phage terminase, ATPase subunit
                     /db_xref="SEED:fig|6666666.356836.peg.42"
                     /translation="MGRSGTAGGSGRSLADMETTAQHTDLDPRRQAMFLWFQGLRIARI
                     AEMLGEKPATVHSWKKRDKWGDYGPLDQMQLTTAARYCQLVMKPVKEGKDFKEIDLLAR
                     QAERHARIGKFNNGGNEADLNPKVANRNNSPRKPPEKNVFTDDQIEKLVDVFHRGMFDY
                     QRHWWEAGNKYTVRNLLKSRQIGATYFFAREALIDALTTGRNQIFLSASKAQAHVFKQY
                     IIEFAREVDVELKGDPMTLPNGTTLYFLGTNARTAQSYHGNLYLDEYFWIPKFQELQKV
                     ASGMALHKQWRQTYFSTPSSLTHSAYPFWSGTLFNRGRAKADRIDIDLTHAHLSPGVLC
                     PDGQYRQIVTVEDAVRGGCNLFDLDQLRLRYSPADYQNLLMCDFIDDLASVFPLSDMQA
                     CMVDSWEVWDDFQPLLLRPFGRYPVWIGYDPAKGTQNGDSAGCVVLAPPQALGGKFRIL
                     ERHQWRGMDFRAQAEAIRKLTEQYNVTYIGIDSTGVGHGVYQNVKQFFPAAREFVYNPN
                     VKNALVLKAYDVISHRRLEFDAGHTDIAQSFMSIRKAMTASGSRPTYEASRSEEASHAD
                     LAWATMHALFNEPLEGENANSHNIVEIF"
     CDS             27079..27912
                     /codon_start=1
                     /product="Phage capsid scaffolding protein # Fam Scf032"
                     /label=Phage capsid scaffolding protein # Fam Scf032
                     /db_xref="SEED:fig|6666666.356836.peg.43"
                     /translation="MAAKANARRFRIGVEGATTDGRTIERAWLEQMAANYDPAVYTALI
                     NMEHIKGYTPDSPFRRYGKIEALETEEIQDGLLSGKLALYAYLAPTDDLIALTQKWQKI
                     FTSMEVNPDFADTGAAYLVGLAVTDDPASLGTEMLTFSAGAKHNPLAARKQAPGNLFTA
                     AEETSLVFELDDNKPSLFGRISALFAKKQTSDDARFGDVHQAVELVAQEQQQLAGQVQQ
                     HGAQLARLSTLETDLQAQKTELASLKETLGKQDRNPAFRPLSTGGADIATVLTDC"
     CDS             27927..29036
                     /codon_start=1
                     /product="Phage major capsid protein #Fam0066"
                     /label=Phage major capsid protein #Fam0066
                     /db_xref="SEED:fig|6666666.356836.peg.44"
                     /translation="MKKDTRFKYNAYLTQLAALNNVPVEDVGTKFTVEPSVSQTLEDKI
                     QESSAFLTLINIVPVDEQSGEVLGLGIGQTVAGTTDTTQKEREPTDPTYIDGSGYKCTQ
                     TNFDTALPYSKIDLWAKFQDFQTRIRNAIVQRQALDRIMIGWNGVQREKNSNRVKYPLL
                     QDVNIGWLEKIRQEAPAHVIGNIVDDNGQEISRKIRVGKGGDFDNLDALVMAAVNEKIA
                     VQYQDDTELVVICGRQLLADKYFPLVNKEQDNSEKLAADLIIGQKRMGGLQAVRVPFFP
                     ANALLVTRLDNLSIYWQDGTRRRAVIDNPKRDRVEDFESVNEAYVVEDYDCTCLIENIT
                     LGEFAASAAAQVAENGGTPATPDDPNAGA"
     CDS             29039..29701
                     /codon_start=1
                     /product="Phage terminase, endonuclease subunit"
                     /label=Phage terminase, endonuclease subunit
                     /db_xref="SEED:fig|6666666.356836.peg.45"
                     /translation="MALNPFQRHTRFIQGQQAAHSGGTARPLSGYDRMLMQLTEDQMRL
                     KRIQSQEKKAELKRQLLPAYAPWVAGVIAADGQRQDDVLMHVMVWRIDAGDYDGALTIA
                     RHVLRHDWVMPKRYTRTTACTVAEEFADAAIRAFLARQSFDAGLLQAALDLTADADMPD
                     QSRARLYKSLGYAQRLADCPAPALDNLRRALELDQRCGVKKDIEQLERQLRNAENGG"
     CDS             29794..30258
                     /codon_start=1
                     /product="Phage head completion-stabilization protein"
                     /label=Phage head completion-stabilization protein
                     /db_xref="SEED:fig|6666666.356836.peg.46"
                     /translation="MSFIAPESAPAQQDLIKNTAFWPDLDIAHFRDAMRTDGTVTPPRL
                     RQAVLTAISEVNAELFDWRQRQLADGYTSLADVPGEQLDGEPERLHLYRRAVWCWARAN
                     LAERYRDYDATAAGNKRADALEPAIDDLWRDVRWALSRLQSQPHVIVELI"
     CDS             30258..30461
                     /codon_start=1
                     /product="Phage tail X"
                     /label=Phage tail X
                     /db_xref="SEED:fig|6666666.356836.peg.47"
                     /translation="MQVRAQQHDTVDALCWRHYGRTAGLTEQVLAINPGLADIGPILPH
                     GLLVELPDVALAATQETLQLWD"
     CDS             30465..30761
                     /codon_start=1
                     /product="Phage holin # possibly family II"
                     /label=Phage holin # possibly family II
                     /db_xref="SEED:fig|6666666.356836.peg.48"
                     /translation="MNETDKSIVTLFIIGMLIAVGKVLAGGEPVTLRLFLGRVLLGGFV
                     STVAGVALVQFPDLSPLAINGIGAALGIAGYQTIELLIQRRAKQLSDKAGGNE"
     CDS             30787..31239
                     /codon_start=1
                     /product="Phage lysin, 1,4-beta-N-acetylmuramidase (EC 
                     3.2.1.17) or lysozyme #Protein S in phage lambda"
                     /EC_number="3.2.1.17"
                     /label=Phage lysin, 1,4-beta-N-acetylmuramidase
                     /db_xref="SEED:fig|6666666.356836.peg.49"
                     /translation="MLAFSEGTANHPLTRNRGYDVIVTGADGAPEIFTDYRDHPFANGR
                     PAKVFNKQGQRSTAAGRYQQLYRYWPTYKKQLRLPDFSPASQDTLAIQLIRERRALDDV
                     LAGRIACAIVACNNIWASLPGAGYGQREHDAVRLLSVYQQAGGRLA"
     CDS             31236..31670
                     /codon_start=1
                     /product="Phage spanin Rz #LysB"
                     /label=Phage spanin Rz #LysB
                     /db_xref="SEED:fig|6666666.356836.peg.50"
                     /translation="MSLWLKVAALMVLLVAAVAVQSWRLSHAQQLADQQAQTLTAQHAA
                     LTEQASQLKSLADLAERNNAEQARLRSLAADTQEALTERQKTLARLQRENEALKRWADT
                     ALPDDIIRLRQRPALTGGRTYREWLSQANALPVSGGQPAN"
     CDS             31763..32194
                     /codon_start=1
                     /product="Phage tail protein # FIG072132 and FIG003673"
                     /label=Phage tail protein # FIG072132 and FIG003673
                     /db_xref="SEED:fig|6666666.356836.peg.51"
                     /translation="MNKPRLLRNALSSAVPHLRDNPDRLHVFVESGTVVGTLAPSLSWE
                     YRYTLTLIVTDYAGNEDLLVAPVMAWLREHQPDLLANPEKREKGVEFETEILNNGSVDI
                     SISLKLTERVQVRAGSGNQVVEPLLEPGEPDDYWIDRRG"
     CDS             32187..32630
                     /codon_start=1
                     /product="Phage tail completion protein"
                     /label=Phage tail completion protein
                     /db_xref="SEED:fig|6666666.356836.peg.52"
                     /translation="MDNLQRIDDWLAALLAKLTPAERKALLRGVARDLRKRQQERIRLQ
                     QNPDGTAFEPRRVSLKDKKGRIRRQMFSKLRAAKYLKASATATEADVGFIGSAQRLARV
                     HHYGLRDRVREHGPVVKYAARQLLGMDTELINHILNKLHVSIK"
     CDS             complement(32640..33116)
                     /codon_start=1
                     /product="hypothetical protein"
                     /label=hypothetical protein
                     /db_xref="SEED:fig|6666666.356836.peg.53"
                     /translation="MIEKNRLNPCGNKIIDMHGLMVEIEKKIKGENNKDDKAIMVLTFL
                     LIKKFFHLHEDIKSKINIENSRKLFSELNINSLVFIALLREKFIFQPRDAYEFMEKYRA
                     NRYEKPSINISEYAEYNIMIKIMTESFRIGDTQTHAHTMEFISGMPNYDKLIGK"
     CDS             33341..33496
                     /codon_start=1
                     /product="hypothetical protein"
                     /label=hypothetical protein
                     /db_xref="SEED:fig|6666666.356836.peg.54"
                     /translation="MDREFEQSLIVERIAFLAKNAGMEGNDERDRQIALIWIAELAGQL
                     MTLQAA"
     CDS             complement(33503..33823)
                     /codon_start=1
                     /product="Phage protein"
                     /label=Phage protein
                     /db_xref="SEED:fig|6666666.356836.peg.55"
                     /translation="MGHKTLKFSHILEAGAWNMRVLKIECPECGAKAVIRKTNRKHRQI
                     ADIYCACADVECGYTFVMNLTFSHTLSPSAKTGDQLLQTVLNNLKPEQRQMALDLLRTA
                     AA"
     CDS             complement(33823..34872)
                     /codon_start=1
                     /product="Phage portal protein"
                     /label=Phage portal protein
                     /db_xref="SEED:fig|6666666.356836.peg.56"
                     /translation="METEKSSMKRTSHRRQKAQNAPRKKMSIITFGKPEPVLTTGTDYR
                     DVWYDNEFNHYTLPIDRLALAQLVNLNGQHGGILYARRNMVASDYQGGGLSHDDILAAA
                     FDYLTFGDIAILKVRNGWGEVIALTPLPALYTRIRKTGEFVVLQKGEPLVYPPEDVIFI
                     KMYDPQQQIYGLPDYIGGIHSALLNSEAVIFRRRYYHNGAHTGGILYTSDPNMTDEIEE
                     EIERQLASSKGIGNFSTILVNIPNGDKEGVQFIQMGDISAKDEFANVKNISAQDVLNAH
                     RFPAGLCGIIPQNAAGLGDPEKARNTYRKDEVIPIQRRFMASINKDPEIPQNLHLIFDV
                     GDDTTIQGA"
     CDS             complement(34848..36623)
                     /codon_start=1
                     /product="Phage terminase, ATPase subunit"
                     /label=Phage terminase, ATPase subunit
                     /db_xref="SEED:fig|6666666.356836.peg.57"
                     /translation="MAKYSDELIGVARLLYLKRATPKEIAADLNLPNARIIYYWAQKFG
                     WADLLSAESTEEAIERRYQLLAGRDKKTELELQEMDMLIAHAVKLRAQSNKHKEKLAAA
                     GHGNTPGSRSNDDDERPAKKRQYRKNDISSLTKEDFDAWADEHLFGYQKHLRLNIGQQV
                     RNILKSRQIGATWYFAFEAFENAVLTGEPQIFLSASRAQAEVFRSYIVNIAQQYFDITL
                     TGNPIRLSNGAELRFLSTNKNTAQSYSGHLYCDEYFWVPNFARLNEVASAMATHDKWRT
                     TYFSTPSAKTHQAYPFWTGEEWKRGNKKRAGVNFPGFDELRDGGRLCPDGQWRYVITME
                     DAIRGGFNLASLEKLRNRYNVDTFNMLYMCVFVDNKDAVFSFDDLERCGVDPATWQDHD
                     PTAPRPFGNREVWGGYDPARSGDLSTFVIVAPPIYDGEKFRVLLVVNWHGMNFRYQANQ
                     IKKLFQRYHFTYIGIDVTGIGAGVFENIQHFAMRQATAIRYGVETKNRLVMKAADVVES
                     QRIEWDQDEKAIPASFMAIRRTTTASGNAMTFIADRSAETGHAEAFFAIAHALDNEPLN
                     YENKPQSRWRLKKAA"
     CDS             36654..36779
                     /codon_start=1
                     /product="hypothetical protein"
                     /label=hypothetical protein
                     /db_xref="SEED:fig|6666666.356836.peg.58"
                     /translation="MTGVYFAVFVKASLSEWRRIKPVAARFLFRNNAVIRQKRSM"
     CDS             36780..37616
                     /codon_start=1
                     /product="Phage capsid scaffolding protein # Fam Scf032"
                     /label=Phage capsid scaffolding protein # Fam Scf032
                     /db_xref="SEED:fig|6666666.356836.peg.59"
                     /translation="MSQLMTNWICIATEGETVDKRVMERQWLIDAAETYDPQLYTALIW
                     PEHETWFGNAGEVLALKAENGDDGLLRLFAQLRPNHQLLQANREGQLLFCSVELTPDGN
                     FRGTGKTYLEGLGVTNTPASVGTTRLRFSSKKRGRLFGALKPLVIDEVKEIKGNSMASK
                     SWHSLFGIKPKAFAEGEGESNDAGGDDKLQALAEALAELESRVTALESQQSQTTDAVEA
                     VQDDMDTVKEVVDTEDFATLRNNLPKILNNFGKLDRSITKLPQRQVGNKPKGFNFL"
     CDS             37671..38699
                     /codon_start=1
                     /product="Phage major capsid protein #Fam0066"
                     /label=Phage major capsid protein #Fam0066
                     /db_xref="SEED:fig|6666666.356836.peg.60"
                     /translation="MFLNQRAREYLSAYSVGLAQEYGVADTARYFALTDPKETQLRAAL
                     LERVDFLSMINVLDVDQLSGQVVSVGSSALHTGRKEGGRFIRQVGVEGNDYKLVETDSC
                     AALPWDLLSVWANAGGEDEFFQLVQAFSNEAFALDMLRIGFNGNSVAKSTDPDENPNGE
                     DVNIGWHQRMKDFKDGQQIITDRVVLDENGDYKSLDAMASDLINAKIPQQYRNDPRLVV
                     MVGADLVAAEQYRLFQKADRPTEKIAAQMLDSTIAGRPAIVPPFMPGKRMTVTTLSNLH
                     IYTQRNTRQRKAEFVEDRKQFENKYLRNEGYAVEYPELYASFDESAVTIGTVAEPAEKE
                     PA"
     CDS             38703..39404
                     /codon_start=1
                     /product="Phage terminase, endonuclease subunit"
                     /label=Phage terminase, endonuclease subunit
                     /db_xref="SEED:fig|6666666.356836.peg.61"
                     /translation="MALSPAQRHNARMVAEQQLSRCQAVSGDHSLHVQLRALENDVARL
                     RSQPTLRDRVEMKRRELLPRWLPTVQRYLDSGEVYQNPVFAHCVVWLFDVEEFDQGLAW
                     ADIAIAQGQHTPDNIRRTFAAFVADTVLAWAQQTADIGQSVEPYFSRTFKNVAENWRLH
                     EEITAKWFKFAGLLLLRDEQGQPRATAAADIDTLTAADALLHQAEQFYRQVGVGTMRRN
                     IAARIRALQKE"
     CDS             39501..39953
                     /codon_start=1
                     /product="phage head completion protein (GPL)"
                     /label=phage head completion protein
                     /db_xref="SEED:fig|6666666.356836.peg.62"
                     /translation="MFSGTPVDYQDELLANNGFWPDLNVRDFQSQRTIPADLAADTVAQ
                     ALLAAVGEVNADLAEVEASRRAKGFMRAQDVPGVSLKGQNVLCAQYQKAVFARAKADLL
                     GEFATIGRRESHPGQEGDDTRKGLLGEAAMVIRRMKGLKRATVRMV"
     CDS             39950..40447
                     /codon_start=1
                     /product="hypothetical protein"
                     /label=hypothetical protein
                     /db_xref="SEED:fig|6666666.356836.peg.63"
                     /translation="MSKLDDLTTFVSTHLPPRVMQGFDSFMDEVSFIPARRDLGEDQYQ
                     LAVMKFDAVLSWERWPYRVCDPRNLCALLLVWQEGQDDVPYMDAGLDMELPTLDVDVRD
                     QDSAIVVVSLQLAESLAIVADDNGIIPFDGRRWRLTSPEVWQATSGHLFGAGDDGAEVG
                     AS"
     CDS             40444..41148
                     /codon_start=1
                     /product="hypothetical protein"
                     /label=hypothetical protein
                     /db_xref="SEED:fig|6666666.356836.peg.64"
                     /translation="MIVHGELSQSQLAELRTALQRLTLPPKKRQRLLWRLAKYGVIAAA
                     KRNVRAQQAPDGSAWAARRGHRRGRMLRNLPNLLHIREMPEIQAVRIYLQGGGYRNGKT
                     PVPAGVVGYSQQNGMSVSVKRSQVGNGRPEPGRMATRRQARKLRALGYRVKRGARWKKP
                     PYREIEESLSFAQAGLLIRKLSGKAAKTAWTVDVPARPFLGMNDAEFTKALARQLQGIG
                     FGWDVKAQDIKG"
     CDS             41151..42266
                     /codon_start=1
                     /product="Conserved hypothetical phage protein"
                     /label=Conserved hypothetical phage protein
                     /db_xref="SEED:fig|6666666.356836.peg.65"
                     /translation="MSWPTVQVNQVNQLQGETSEIERVVLFIGEGSVETVKTVPVNTQS
                     DLDQVLGAADSVLKRDVSAAMVNAGQNWSAFVCLLPPKGDWVSAVTAAQQVASVEGVVV
                     SLPATKGIIAQASSLRSTLVSAFGRWVWFLLAVDSPKEGEGWDKYLQSLSNLQNGAAAP
                     AVQLVPRLWGNEPGVLAGRLCNRAVTIADSPARVQTGALLAMGRTDLPMDGAGVTLDLA
                     MLQALEKQRYSVPMWYPDYDGYYWSDGRTLDVEGGDYQAIENLRVVDKVARRIRLQAIA
                     KIADRSLNSTPGSIAAHQGYFAKTLRDMSRSTQINGITFPGEVKPPKDGDVVIAWRSKT
                     AVEIYLIVRTYECPKGITVSLVLDMSLEGSA"
     CDS             42263..42718
                     /codon_start=1
                     /product="hypothetical protein"
                     /label=hypothetical protein
                     /db_xref="SEED:fig|6666666.356836.peg.66"
                     /translation="MTKRISGQSFDFNMDGALVHAEKVSLSITDNTAAAQTQGIPDGWV
                     AGDVAAEGEMELSTKSLAVVTAKASSAGSWRGIDPVDLMWYAKAGSEEMKVEAFGCKLI
                     LSDILDVDPKGGSVMSHKIKFVVTSPDFVRINGIPYLESELTEKLIG"
     CDS             42727..43032
                     /codon_start=1
                     /product="Phage holin # possibly family II"
                     /label=Phage holin # possibly family II
                     /db_xref="SEED:fig|6666666.356836.peg.67"
                     /translation="MQEYEKNALGLLVLGALIALGKLLASDEKITPRLFFGRMILGSAT
                     SMAAGAALVWVPGLPPMAVTGLGAALGVAGHQAVEIWLRRRGSGLLKGSDAKDDVK"
     CDS             43019..43360
                     /codon_start=1
                     /product="Phage protein"
                     /label=Phage protein
                     /db_xref="SEED:fig|6666666.356836.peg.68"
                     /translation="MTLSEKQQLFTQLVAQLIQWAGERGYRLTFGEAYRTLEQAKLNAH
                     SGSGIANSLHTQRLAVDLNLFIDGEYQTRTEAYLPLGEYWESLGGCWGGRFTSRPDGNH
                     FSLEHNGVR"
     CDS             43360..43716
                     /codon_start=1
                     /product="hypothetical protein"
                     /label=hypothetical protein
                     /db_xref="SEED:fig|6666666.356836.peg.69"
                     /translation="MDGLWRVVAGLTVAFAAGWQTASWQRDSIDLAVTRAATAAAEQSR
                     QALQALASQSGEALESKLEALRNVPNKTVYREIVKPVFTNVCLSAEFVSLYNDAVNHTE
                     RVLSGKPEKEMSGQ"
     CDS             43673..43852
                     /codon_start=1
                     /product="hypothetical protein"
                     /label=hypothetical protein
                     /db_xref="SEED:fig|6666666.356836.peg.70"
                     /translation="MSYQENLKKKCPVNNLPRLSGTTGNDAAQPLISWPQIYADCAARH
                     NQLIDEITQRENMQ"
     CDS             43849..44106
                     /codon_start=1
                     /product="Phage protein"
                     /label=Phage protein
                     /db_xref="SEED:fig|6666666.356836.peg.71"
                     /translation="MSKITLSVSGKELSFEPNTVAYNGMINDMAMDNKVAPAVTYLRRI
                     VVAKDKETLDELLKLPGAALQITEAVNAQYAPKLEIEVKN"
     CDS             44294..46258
                     /codon_start=1
                     /product="Phage-related tail protein"
                     /label=Phage-related tail protein
                     /db_xref="SEED:fig|6666666.356836.peg.72"
                     /translation="MKQLDFTLSLIDKLTRPVKQAQAAVTGFAKSSRDAFSKIAVGGAG
                     LIGTAMSIQGALGPAVEMHGAMVEASARGVDDSALQKINANALKFSTQYGRSALEYVQS
                     TARINAAVGTLTKEDLPGVVRASNVMAAALKATADESSEFMGQMFANFRSDAESMGNVQ
                     FAEQLAGKAAYMRNAFGVELGAIKDLMEGARGVGTNYGIGMDEQLAVMGELQRTLGTEA
                     SSAYEGFLSGAVKGAQKLGLSFEDSNGKLLTMPAMLEKLRGKYGASIEGNLKAQSDLDD
                     AFGDSAAVIKQLYGNVGVLQRHITELGSNDGMTRATEMAQKMTSPWERLTAIWYAIRAA
                     MGATLLPVLYPLINKMADGGQVLVRWLNLFPNITRVIGYCVLAVLSLAGAGAIANIVMG
                     VSVFMLGGLKGLWKGLTAIMKIHVGVIWLYNKAVLAWAATMRILRGVLLAVRMASLLTG
                     MAFNIALWPVLLIIGAVALLVAGCSLLIRHWDGIKNAITQTDMWKTVAEKVQWVAEIFS
                     QTWKAIIDGWNRVVNAMGSFSLTETMGKMADGVGEIFSGLWDGILASFNSSYRWIIGKL
                     NAIPGINIAMPESVPRPGGEGLLTGGKIKGIDSGGLQRDISNSNAKNYTDNSRKVENLT
                     IYANKGFTPEQLTEWEALR"
     CDS             46258..46587
                     /codon_start=1
                     /product="Phage protein"
                     /label=Phage protein
                     /db_xref="SEED:fig|6666666.356836.peg.73"
                     /translation="MDDVKYIDLLITERDFSLNSGREPIFCNNRISIGQDCVHAIIESG
                     LTTKLVAERSPTLRADVLTQMIILVEDDERIIPGTVVISEESPTRLWVTAETYDFGPIT
                     ARVDV"
     CDS             46584..47768
                     /codon_start=1
                     /product="Putative bacteriophage protein"
                     /label=Putative bacteriophage protein
                     /db_xref="SEED:fig|6666666.356836.peg.74"
                     /translation="MTEKPKIDYEQVLKEAGMPVTAETVTEQFQAQVTASGLVTNTSRM
                     SPFWRLISVMATTPVIWLKDVLISVVLANMYLATASGPFLNLFAWGVNLSRKAATAAAG
                     VVRFYKSDAAQAVVIPAGTLIQTERINGTVFSVAVSVDTVIAAGLASADVPVTATADGG
                     AFNLAPGYYRILPVGVAGIERVENQEDWLLTPGADEESDDDLRERCRNQFNLVGNYHTD
                     AVYRSMIAAVAGLSIDRIFFQHDAPRGPGTANAYLLLDSGVVSQPFIDAVNDYITAQGH
                     HGHGDDLRCMALPETQHELTVTVYVRNLVNVTDEALAALRSGCQDLVRCAFRENTGYDV
                     AKTWPWSRFSFSTLAQELHDAFPLIASLDFSLGDIVSGLNVPRLASLTVVIADA"
     CDS             47761..48393
                     /codon_start=1
                     /product="Phage protein"
                     /label=Phage protein
                     /db_xref="SEED:fig|6666666.356836.peg.75"
                     /translation="MPDFKEQLSGLRLPSWMDKGEPAALLNASKAYWLQVNDWLRWPLQ
                     QLDVDTCAEPLLNVLAYQRDISRLKGEALTLFRRRVKYAFVNAQDSGSVAGFIAIFERL
                     GIGAVTLAERQPGYDWDVILVRINDEQLSGYNALMMSLVRQYGRTCRRYVFDLWNGETQ
                     SVRCGEFEHNAEYYHAVSLMPAGTVTARVALHPVRTSASTEYYSANV"
     CDS             48402..49823
                     /codon_start=1
                     /product="alternative bacteriophage tail fiber C-terminus"
                     /label=alternative bacteriophage tail fiber C-terminus
                     /db_xref="SEED:fig|6666666.356836.peg.76"
                     /translation="MAQSVITHAFETWNVQRVLDGTAARPDQVVFARVPGQDESVPVDR
                     NEGLPPADQIQHTAAITQAGVLNENAVVYSVVLDTTVGDWDYNWIGLLDSKTNTVLMIV
                     HVRTQQKLATRNGQQGNSLTRNLMMQFDGAAAATQINVTADTWQIDFSARLAGIDERIR
                     IENMDRYGSSAFFGNAYQVVKDGNAYVVKAGVAYAAGLRAWLSSDLKITVDALPTRVFL
                     DVCWRGEFTQAWAVDSQIVVANSADHEIRDGVQHYLLPVADIDENGNITDWRKQGSLAE
                     QNAQTLYLRKDDNLAALRDKEASRKNLGLGQLAVMDTDTARQTLRITQLENELVGIPLP
                     YPGATAPDGWLKCNGQSFNKSMYPLLAGRYLSGFLPDLRGEFIRGWDDGRGVDAGRSLL
                     SAQTQTVQDHKHVGTMVNSNPLQTGMNTGIGLLSQYTSTPTVGYSNEISSGGTAEGSKE
                     TRPRNVAFNYIVRAA"
     CDS             49823..50443
                     /codon_start=1
                     /product="Tail fiber assembly protein"
                     /label=Tail fiber assembly protein
                     /db_xref="SEED:fig|6666666.356836.peg.77"
                     /translation="MANYSVNVKETTLDKDGHAMMAGWITVFHVDAKTREYRGASYEYL
                     MAGVGIPADSYSDAPELPPEGKALCRAADGLSWMSVPDYRGRVAYDTQTRLSTEITVPG
                     QLPETLTLLAPVSEFDIWNGKKWVTDTDAQHQAYVNSAMQELNERFTTANTRIQALSDA
                     VDMELATEEEKALLGKWKEYRVLLNRVDVNTAPDIVWPETPAV"
     CDS             50530..51165
                     /codon_start=1
                     /product="Phage protein"
                     /label=Phage protein
                     /db_xref="SEED:fig|6666666.356836.peg.78"
                     /translation="MGNVTDNGHYLSPANAVAYLAERLGTAADNLTVCVWMVCGSGLGE
                     FLQALDALTVVFPAPALSQVARQARAMAELATVKMQIPAKNCTFPAAAPLSVASCRQAL
                     NAQRMAAAQQQAAVPMGLNALKGMAERFTSQREAALSEISKTMQQMAQRSALAWVFTGQ
                     GAMGVIAAEMLKNIPQPSAIYTAAMMFTGKELDALESMIREPDNYTRP"
     CDS             51137..51664
                     /codon_start=1
                     /product="Phage protein"
                     /label=Phage protein
                     /db_xref="SEED:fig|6666666.356836.peg.79"
                     /translation="MSQIITLALDGEAIPLRGLTVTPSMQFEEKDQSGQTSSTANAEQG
                     IKPKELRVSGVIPFTEAKVLTRLFALAEAKEGDQLKRYRVANLTAQAINFRLATFTGSI
                     DAPKQDGKQAWLVTFTLREHISVSEKRDARAGNQTETKKQAPGQGSAAGEGGEKLSWFE
                     RKVLKPVNDALG"
     CDS             51668..53320
                     /codon_start=1
                     /product="Hypothetical bacteriophage protein"
                     /label=Hypothetical bacteriophage protein
                     /db_xref="SEED:fig|6666666.356836.peg.80"
                     /translation="MRPITRLMLSGDAVHVVDANVVLELNACGRGFITVETEQDYTGKL
                     VRLDVGYTDLVLRWFTGYVERSQPAENGYQRLFVRELAGVFDRMWPCSFQHPTLRQLAD
                     WLSEHSGLTVQLPDAAYVSKPIPHFTHSGSGHQLLANIGAAFGIDDYVWQPLPDGALYL
                     GSWADSLLAGAPVSIPAEFSQAQAAGNSMTLPLIQSVRPGAVVNQQRLSRVQLLNESMT
                     IEWVPVSTVTGKAAQRSPAQRQIDTAYPELSAGLHLPKFARVEAPSEAVSSGNIADPFR
                     PRYAVDLQLLDADGKPAKDTPVYPAVPLPVPMAGSEAGLFQFPPPGTLVEVGFTGGRPD
                     KPFVRQTVASGQSLPDIKPGEQLQQQRAEVSQRVTVAGDWERKTDQAIRESSMHREVSA
                     DEERRTLVTRETLIKATDSATVLGTHTLQAGAIVQIAQGDYSLATQAGYTASVGQSATV
                     EIGQSLTEKIGQLRRSIAGARQELMAPVVWVGSQQVNVMTLMLDTLDVIQELATQTASH
                     THPNTGTPLNAGEIQQTGRRTGTLKDKYSPIIG"
     CDS             complement(53557..53682)
                     /codon_start=1
                     /product="hypothetical protein"
                     /label=hypothetical protein
                     /db_xref="SEED:fig|6666666.356836.peg.81"
                     /translation="MVIKPRSKKLKNAEIPFTVFSGRSSAKARRRRGLALGFVEK"
     CDS             complement(53866..54369)
                     /codon_start=1
                     /product="hypothetical protein"
                     /label=hypothetical protein
                     /db_xref="SEED:fig|6666666.356836.peg.82"
                     /translation="MALTKCKECKKEVSTSAKVCPHCGVKNPSTTAGQAIGGFVVLVLL
                     VWGAIKIFGGSDDKPTAKADTPKNCAANDGQCLFDKNWIEAASRCRPLIEKSSKYDFEW
                     TDGMMTPMFSHFRLNEAKKQMTFIGDKVKFTNGFNAKITMTYNCSYDLQSKSIVDFGIT
                     EGKL"
     CDS             complement(54957..55439)
                     /codon_start=1
                     /product="tmRNA-binding protein SmpB"
                     /label=tmRNA-binding protein SmpB
                     /db_xref="SEED:fig|6666666.356836.peg.83"
                     /translation="MTKKKAHKPGSATIALNKRARHEYFIEEEIEAGLALQGWEVKSLR
                     AGKANISDSYVLMRDGEAYLFGATFTPLHGASSHVVCDPTRTRKLLLNQRELDSLYGRV
                     NREGYTVVALALYWKNAWCKVKVGVAKGKKEHDKRDDIKEREWKLDKARIMKNAAR"
     CDS             55595..56029
                     /codon_start=1
                     /product="Putative oligoketide cyclase/dehydratase or lipid
                     transport protein YfjG"
                     /label=Putative oligoketide cyclase/dehydratase or lip
                     /db_xref="SEED:fig|6666666.356836.peg.84"
                     /translation="MPKISRSALVPFSAGQMYKLVNDVSSYPAFLPGCTGSRVLSSSGS
                     EMTAAVDVSKAGISKTFTTCNTLIDNQCILMRLVDGPFRQLTGDWRFTPLSDDACKVEL
                     NLDFEFKNALIEMAFGKIFKELANNMVQAFTLRAKEVYCA"
     CDS             56043..56315
                     /codon_start=1
                     /product="UPF0125 protein yfjF"
                     /label=UPF0125 protein yfjF
                     /db_xref="SEED:fig|6666666.356836.peg.85"
                     /translation="MVYALPERQYLRPLTLEAGSTAEQAIQASGLLALRPDIDLGVNKI
                     GIFSRPAKLTDVLSDGDRVEIYRPLLADPKELRRQRAERSKNKAR"
     CDS             complement(56432..56776)
                     /codon_start=1
                     /product="Outer membrane lipoprotein SmpA, a component of 
                     the essential YaeT outer-membrane protein assembly complex"
                     /label=Outer membrane lipoprotein SmpA, a component of
                     /db_xref="SEED:fig|6666666.356836.peg.86"
                     /translation="MRCKTLTVVAAVVVVMLTAGCSTLGRVVYRPDINQGNYLAPADVA
                     KIHNGMTKQQVIYTLGTPMMQDPFGSDTWYYVFRQQPGHEAVKQQTLTLTFNSQGVLAN
                     VDNKPTLQTQ"
     CDS             complement(56888..58549)
                     /codon_start=1
                     /product="DNA repair protein RecN"
                     /label=DNA repair protein RecN
                     /db_xref="SEED:fig|6666666.356836.peg.87"
                     /db_xref="GO:0005524"
                     /db_xref="GO:0005694"
                     /db_xref="GO:0051276"
                     /translation="MLAQLTISNFAIVRELEIDFQAGMSVITGETGAGKSIAIDALGLC
                     LGNRSDANMVRPGTGRADICARFSLADTPAALRWLEHNQLDDNNECLLRRVISADGRSR
                     AFINGTAVPLSQLRELGQHLIQLHGQHAHQLLLKPEHQRHLLDAYADESQLLSAMRQIW
                     QQWHQSCRELAQHQQATIEREARRELLQYQLKELNEFAPLAGEYEQIDVEYKRLANSGQ
                     LMSLSQQTLQILSENEDQNLLGMLHSARHQLSELVSMDEKLSSVFSMLEEAGIQISEAS
                     DELRHYCDSMELDPIRLYELEQRLSRQLTLARKHHVTPEALPTFYQQLLQEQHLLEQQE
                     SDHETLNRTVQEFHQQALHVAEQLHARRCQHASELAELITTNMHELAMPNGHFTIDVTF
                     TPDSLTANGADHIEFCVTTNPGQPHQPLIKVASGGELSRIALIIQVITARKMDTPALIF
                     DEVDVGISGPTAAIVGKMLRQLGQSTQVMCVTHLPQVAGCGHHHYFVSKHTDGAATETL
                     MQPLGKRERLQELARLLGGSAVTKNTLANARELLAA"
     CDS             complement(58633..59511)
                     /codon_start=1
                     /product="NAD kinase (EC 2.7.1.23)"
                     /EC_number="2.7.1.23"
                     /label=NAD kinase
                     /db_xref="SEED:fig|6666666.356836.peg.88"
                     /db_xref="GO:0003951"
                     /translation="MNRSFNCIGIVGHPRHPNALTTHEMLYHWLRAQGYHVVIEQQIAR
                     ELQLTDAATGSLSEIGQQADLAVVVGGDGNMLGAARVLSRYDINVIGINRGNLGFLTDL
                     DPDHTQQQLSEVLAGRYIREQRFMLEAQVCRANHPNSSSTAINEVVLHPGKVAHMIEFE
                     VYIDDKFAFSQRSDGLIISTPTGSTAYSLSGGGPILTPSLDAIALVPMFPHTLSARPLV
                     INSSSAIRLKFSHITQDLEISCDSQISLPVQEGEEVLIQRSQYHLNLIHPENYSYFNTL
                     SSKLGWSKKLF"
     CDS             59657..60271
                     /codon_start=1
                     /product="Heat shock protein GrpE"
                     /label=Heat shock protein GrpE
                     /db_xref="SEED:fig|6666666.356836.peg.89"
                     /db_xref="GO:0000774"
                     /db_xref="GO:0006457"
                     /db_xref="GO:0042803"
                     /db_xref="GO:0051087"
                     /translation="MNAKNAENFMSSKEQKSPDEQVLDQKEAAEGQQADAVPETTAVAD
                     PRDERIAELEAQLNDAQQRERESALRARAEMENVRRRAELDVEKAHKFALEKFAGEILP
                     VIDNLERALEMADKSNDALSGMIEGVELTLKAMLSAVNKFGIEVVADVNVSFNPEIHQA
                     MTLLESADHAPNHVMMVMQKGYTLNGRLLRPAMVAVSKAKE"
     CDS             60445..60558
                     /codon_start=1
                     /product="hypothetical protein"
                     /label=hypothetical protein
                     /db_xref="SEED:fig|6666666.356836.peg.90"
                     /translation="MEGIYSCDGIYSRNAVPVVFCLYFVNLYVLKRVSFVG"
     CDS             60730..61965
                     /codon_start=1
                     /product="Manganese transport protein MntH"
                     /label=Manganese transport protein MntH
                     /db_xref="SEED:fig|6666666.356836.peg.91"
                     /db_xref="GO:0005215"
                     /db_xref="GO:0006810"
                     /db_xref="GO:0016020"
                     /translation="MPGSRVVESVSRTSRKLKLSLMGPAFIAAIGYIDPGNFATNIQSG
                     AAYGYQLLWVVVWANLMAMLIQLLSAKLGIATGKNLAEHIRDRLPKPAVWAYWVQAEII
                     AMATDLAEFIGAAIGFKLLLGVSLLEGAILTGIATFLILMLQQRGQKPLEMVIGGLLLF
                     VAAAYIVELIFSSPELASLAKGMAVPSLPNSDAVLLAAGVLGATIMPHVIYLHSSLTQQ
                     QSNITRAERYSATKVDVAVAMTIAGFVNLAMMATAAAAFHFSGNTSIAELDQAYLTLKP
                     LLGQAAATIFGLSLVVAGLSSTVVGTLAGQVVMQGFVRFHIPLWVRRVVTMLPSFIVIL
                     SGMNPTRVLVLSQVLLSFGIALALIPLLVFTGDRELMGGLVNSRRVQNIGKVIVCMVIA
                     LNLYLVLDTLLG"
     CDS             62124..62708
                     /codon_start=1
                     /product="GDP-mannose pyrophosphatase YffH"
                     /label=GDP-mannose pyrophosphatase YffH
                     /db_xref="SEED:fig|6666666.356836.peg.92"
                     /translation="MSSPITILDKQLLSDHWFVLHKYVFDLKRKNGGIVRQMREVYDRG
                     NGAAILLYNRVRGTVVLTRQFRMPTYLNGNESGMLLEACAGLLDDQSPEQCIRNEAIEE
                     TGYQIGEVEKLFEAYMSPGGVTELVHFFAAEYDDSQRKTNGGGVDDEDIEVLELPFNDA
                     LAMIKDGRIRDGKTIMLLQHAQINGWFANMR"
     CDS             62982..65261
                     /codon_start=1
                     /product="NADP-dependent malic enzyme (EC 1.1.1.40)"
                     /EC_number="1.1.1.40"
                     /label=NADP-dependent malic enzyme
                     /db_xref="SEED:fig|6666666.356836.peg.93"
                     /db_xref="GO:0004473"
                     /translation="MDEQLKQSALDFHQYPVPGKIQVSPTKPLATQRDLALAYSPGVAA
                     PCLEIAEDPLAAYKYTARGNLVAVISNGTAVLGLGNIGALAGKPVMEGKGVLFKKFSGV
                     DVFDIEVDEQDPDKLIDVIAALEPTFGGINLEDIKAPECFYIEQKLRERMKIPVFHDDQ
                     HGTAIICTAAVLNGLRVVEKQISDVRLVVSGAGAASIACLNLLVALGLKHENIVVCDSR
                     GVIYKGREANMAETKAAYAIDDNGSRSLADAIPNADIFLGCSGPGVLTQDMVKTMAPRP
                     LIMALANPEPEILPPLVKAVRPDAIVCTGRSDYPNQVNNVLCFPFIFRGALDVGATTIN
                     EEMKLACVHAIADLALAEQSEVVASAYGDQDLSFGPEYLIPKPFDPRLIIKIAPAVAKA
                     AMASGVATRPIENFDDYIEKLTQFVYKTNLFMKPVFSQARTQPKRVVLAEGEDPRVLHA
                     TQELVSLGLAFPVLIGRPGVIEKRIQKLGLQIAIGKDFEVVNNESDPRFKAYWTEYFEM
                     MKRRGVSQEQAQRDMRGNPTLIGSIMVHRGEADAMICGTVGNYEEHFSVVEKVFGYRDG
                     VHVAGAMNALLLPSGNTFIADTYVNPDPTSEQLAEITLMAASTVRRFGIEPKVALLSHS
                     SFGTSDSPTAKKMRATLERVNKLAPELQIDGEMHGDAALVEAIRREQMPNSPLKGAANI
                     LIMPNMEAARISYNLLRVSSSEGVTVGPVLMGVAKPVHILTPIASVRRIVNMVALAVVE
                     AQTELL"
     CDS             complement(65319..65768)
                     /codon_start=1
                     /product="probable P23 protein"
                     /label=probable P23 protein
                     /db_xref="SEED:fig|6666666.356836.peg.94"
                     /translation="MTAIWVDADACPNVIKDVLYRAADRTATRLTLVANQPLKTPPSPH
                     IHSLRVAAGFDVADNEIVRRVQPGDLVITADIPLAAEVLEKQAVALNPRGERYTPDTIR
                     ERLTMRDFMDTLRASGVQTGGPAALNQRDRQQFANELEKWLRQQA"
     CDS             complement(65765..66703)
                     /codon_start=1
                     /product="Coproporphyrinogen III oxidase, aerobic (EC 
                     1.3.3.3)"
                     /EC_number="1.3.3.3"
                     /label=Coproporphyrinogen III oxidase, aerobic
                     /db_xref="SEED:fig|6666666.356836.peg.95"
                     /db_xref="GO:0004109"
                     /translation="MSSPDINAIKHFLLTLQDNLCRQFELTDGTATFIEDAWQHASGGG
                     GRSRVLRQGQVFEQAGVNFSHVSGTSLPPSASTHRPELAGRSFQAMGVSLVVHPLNPYV
                     PTSHANIRFFIAEKPGEPAVWWFGGGFDLTPYYGFEEDAVHWHQTAFDLCKPFGDDVYP
                     RYKQWCDDYFVLKHRNEARGVGGLFFDDLNTPDFDASFAFMRAVGEGFRHAYLPIVNRR
                     KDIPWGERERQFQLYRRGRYVEFNLVWDRGTLFGLQSGGRTESILMSLPPLVRWEYQYQ
                     PEPDSPEAALYRDFLPARDWLGLNTPSGARG"
ORIGIN
        1 tatggatgca ttagccagag caatcataaa tctcggtagt tcgctgaggg gaagggctgg
       61 catattctgc tttttaggct tactgaaacg ctgtccaagg ttatccgctg ggttgaactc
      121 tatgagttct tctgttgcgg catagcggaa aatttcattc aggcgggaaa tgatacgacg
      181 tagggtttct agtacgcccc gttgttcaat ggggtcaagg tgttgtttta agagcttagg
      241 tcggatcttt ttgataggaa aattgcctaa accggggaag atatttcgtt cgaggcttcg
      301 ccagatgtct tctgcatgat cttgtgagat accagaggat taaccttttc atctaaccac
      361 ttcttcgcga cagcctttag cgtgtgctct gtagcgtcct taagagcatt ggctttatcg
      421 ttgttgtgag tctgcggatc gataccgttt gcgagcaatg acaaatattc atcacgtaaa
      481 gttcgtgcct tggcaagggt aagatgagga taagttccta aactcatctt agttcgcttt
      541 ttagttactg gtaccgcata cctgaaatac cagtttttct tgccacctac agagagagga
      601 gcgatccgta gcatcaggcc gtcgccatca aaaaggttga tctccttttc tgctggcttg
      661 gtatttttga tttcggtgtc agtaagtttc ttagcgatct ttgccatttt aggaccctcg
      721 agctggggga atctgaattt tcaacgtaat attatgatat taattatata aatatgaatt
      781 catactttgc gtgtatacct aaacgtatac caatgctgaa aagtgatggg ccttcttatc
      841 tgcggtgcgc cttgtctggc aacgcctttt catcacctta ttccgcgcta ttttttataa
      901 gtacacgcga atatcacttt ttagtggttt tcgtgtgtac ttgactgggt gaaattgttc
      961 aagtatacgt gaataacaca attatgtggt tttcatgtgg acttatgaat ggacagaatc
     1021 acggctattg aacgtttaaa cgcattcgat aagcaagggc gctatgtttt cacttcccgc
     1081 gatttagcca aaatttttca tgaagatcgc cccagagcgt ttaatgctgg gctaactcgg
     1141 ctggtgaaag atggcattct gacccgtgcg attcgagggg tgtacgtcta taaccatgcc
     1201 aaaagcaaag acgcctatac gcttgagcgc atcgtgttag cgctgcgacg tggcgagtat
     1261 aactatctca gccttgaatc agctttgtct gagtatggcg tcatttctca aatcccgatt
     1321 ggccggatca cggtaatgac aaccggacgt tcagaagaac ataaaacgcc tttcggtgtg
     1381 atcgaattta cccataccaa gcggccacct gagcagattt tgcaggatac ctatttgggt
     1441 aattccccat tgcggcaagc aacgaaacaa accgcggtga gggatttacg ccgcgtcgga
     1501 cgtaacaccc atctgatcga cgaatcggag ctataccatg aatcagaaag ttaactttgc
     1561 cgagctggtc agcaaagcga tggaatcagc cgagcttgaa ggtcttcgta acgtggtgga
     1621 aaaggagctt ttgcactatg acattcttta ctgtctggat agtgcgggtc tgctggagca
     1681 gcttactttt cagggcggga catcgttaag gctgtgtcat ggcggaaatc ggttcagcga
     1741 ggatttggat tttgccgggg ggatcgcatt ttccggtgca gacctgaaga acatgaaagc
     1801 ctgtattgaa gattatctgg ggaatcggta cggccttgag gtcaacgtga aagagccaaa
     1861 tgagctacgg aatgaacccg gctatgagga agtacgtatc gacaaatggc aggtatccgt
     1921 gaccactgca ccggaaaaac gtgatatgcc aaagcagcga gtcaagattg agatcgccaa
     1981 tattcccgct tatacaagaa tgccgatggc gttaaaacgt aactatgatg ttttaccgga
     2041 tggttactcc gatacattgg ttatgtgtga aacactgaat gaagtgatgt gcgacaaact
     2101 ggtttctctc gtcgcaacca caaaatatat ccgctaccgt gacgtttggg acttaccgtg
     2161 gttaatccag cagaacgcaa cctatgatct cgacctgatc cgaaagaaaa tacaggacta
     2221 ccgaatcccc aattatgatg agctattggc acatcggata cagagcattg agcagattgt
     2281 cggggatggc cgctttagtg cagaaatgcg gcgattcctg ccacaagcgg tatttgacag
     2341 aacactgggg cgtgaggcat ttagccaata tttgagtggc gagttaaaaa cactcttgag
     2401 cacgttacag caggagctaa atgggcaggg agggaaagcg cctttcatca tgtgaacatc
     2461 cacgcccaaa taaaaagatt cttcgaaaaa ctgttcaccc tcttcactgg agagttttat
     2521 tattaataat caatgtatta atggatgatg agtcactcag aaagtgacag gtgactcatc
     2581 attcttttct gataagctaa gagggataaa gactgagact attagtgaga acaataatga
     2641 gtggtatagt actaagatag tagaaatttt taacgtccct gttaaatggt attaacagca
     2701 attgatgaaa actcagcaac gcctagtgat ggcatagtat tctccatatt gtcattgtta
     2761 tgagagaaaa tatcattggt taataatttg ggcaataatt tgttaaggaa tgttctttaa
     2821 attaatttgt gattatttca ataatattta atattcaact aatatatcaa tcatgagata
     2881 atttttactt ataaaaatgt aaattaatta tattctaaat gttttgtgaa aaaggatttg
     2941 tggcaaaacc ggccgaagca ggtttgccac tgttgatgag gtatcaggcc ctgtcacatt
     3001 tgggcagcca gtcggcgtct gactcgcctt tcagttcaag gttggtttgt atgccctgct
     3061 tggttctgcc tttgaggtag accagaccgt attccgacat gatgttaggt agcactttgc
     3121 caaaagccgt caggcttatg ggcttttgat ggccgtgcga ctccataaat gacagatagg
     3181 cgtggtacag gtatttacgg ggattacggg gcgtgatgtt ggcgtttccc atatacagcc
     3241 cggtggtgcc actgtgtgcc tgcaggtagc cgcaaaaatc aaccaatgga tcggcctgac
     3301 gtttgatttc cagcgcttcg gcggaatgtt gttgtgcctg tagcaatgtc cgggcgttgt
     3361 tggggtcggc aaagcgcttc atcaggtgac gcacaattac ggccaattct gcccgaattt
     3421 tctctttcag cttagggtcg cgttcgctgg ccggaatggg ctcgctgaaa tgaataatca
     3481 cccggcgacg agacacgccg ccgctgcggt cgctaaagcg catcggggtg ttgttgacgg
     3541 ccagaatcac cgccggaatt cgggtggaat aggcgtcacg gtatttcggg tcaaccatca
     3601 ccgcatcgcc gccggtaatg gccttgatac cggcaccgtc accgctccat ttctcttgat
     3661 caggcagtac gatgaatgag aaaccaatca gtgacgcgcg ctcacgggaa gattcaatgg
     3721 tgttgatggt cgccgccgtg gtgttgtcct cgccggacag catagtagca atctcggcca
     3781 gaatactttt cccgctgccg ccggggccgg tgacttcaag gaacagttgc cagtcatagc
     3841 agtttgccag caccataaac agcgcggcca gaatacgtgc ctgtttatct tcgttgtgtc
     3901 ctgccgcacg ggtcagccag cgccagaagt gcggagcatt gtcggcaagg ttttctcctg
     3961 ccttaagcgg cgtgtagtcc acgtcattaa cggtatgcaa cccgttctcc cggcggtgcg
     4021 gcttaaactc cccgctgaca gtatcaaaca cgccgttacg aaagccgatt aaccggcgct
     4081 ggggcttggc ctgcatgggg ataatcagtt tcagggtgtc taacacgctg ccaatgctgg
     4141 acgcggtaaa gggagcctgt atcttctgaa acagcacggc gatatcccgg cttaacaagc
     4201 ggtagggtaa ggctttccat gcaccgtttt gatactggaa gaaggtttcc ccaaaagcat
     4261 caatagccag cgtgttgcgg taatggtcgc gtatcttctc cgctttctca ctggcgctca
     4321 tggccttgaa ttcggcctcg cccagcgact caaacgggct ggccttttcc ggctggataa
     4381 actcagtcag gtagtgccgg gtgacgtctg cgccttcacg gcggtacaca tcgttccagt
     4441 caccaaatat cggcggcaga gcgacacgtc catgtacagc agaagcggcc tgaccggctt
     4501 tggactggcc ggtgccgttc tcatcccggt cagcggcgat cagcaaggtc gccgccgggt
     4561 ggcgtgtttt cagttcacgg gcaagggatg acagattgtt agcgctgagc gcgacataca
     4621 cggtatcacc ggttagctgg tacagcgtta acccagtggc atagccctca gccagccaga
     4681 taacggtggt gtgtttgcca ctgaaacagt aaaacgtgcc tttaacctgt ccgcctttta
     4741 gcgtgcgttt gtctccctgt gcattaatca actggatgtt caccacctcg ccatcgtgcg
     4801 tagtcagtgg taccagtaca tcaccggact gatagactat gccgcccatg cgcagcggtt
     4861 tgccctgtag agtgagtacc tccacgtctg gccagccttt ggcgctcagg taggcattac
     4921 cggactgtgt aaccgtttct ttgattttgg cctgtgcctg aaccgccgcc cgttgccggg
     4981 cagcgtcgtt atcatcgtcg tcggaagttg atgctgccgg gctatccggc agcgtaccca
     5041 gcaacgcgct cactttcagg gcggcgtcgg ttggcgtcag gttcagggct ttctcaacca
     5101 gattcagtcc gtcacccgcg ccacactggt tacagaacca tgtgccgcgc tcctctttgt
     5161 tatcgaagcg gaagcggtcc ttgccaccgc ataccgggca ggcgctatgc cgcccggctg
     5221 cgtcaacgga aatccccagc agggggagga gttgcggcca gtggccgctg gcgcgtttca
     5281 cggcctgtgt cacggtaggt tgtgccatgt gttgcccttc agtgcagtgt ggagtcggtc
     5341 tggccggggt cgttcaggtt atcgatagca tcgggcatat ccagcgtggc cgagagcact
     5401 tctaagcgtt ctgccagcac aaacagcagc acttcttttg ccatcgggtt atccagctca
     5461 atcacggcat aggtcagggc gcggcactgg tcggtaattt cttccgcggt caggggcgtg
     5521 acatcaaaca tggcgggcac cccgcagcgg caggcggcca gcaaacgaca acacgtagtc
     5581 acgtgccagc aaacggcggg cgctgatttc atccggggcg ataaccgctt cacggtgcgg
     5641 taaggcgcgt aattccgcgc ggcgcacggc cagaaacaga aaggtaaatt gcgggtgtga
     5701 cggggttggg gtcgtagcca tgtggcagtc tccgttgagt agctaaaact gctaccacca
     5761 gaaacgccaa tttcaagggt ggtagcccag acggggttgg cgtaaccggc ctcaacgaac
     5821 accggccagc ccgaaggctg ccccgcctga gccaccataa tttggatgca gtggcggcat
     5881 aaagtgtgcc gcacattgtg caggtgtgct aaggctgcga cgtaaaaaaa gacgcatggc
     5941 gcgtctggtg tcgccgttga gttgttcagg acgccaatcc cggctatcga ttttgcgaca
     6001 gcgacggaac tatagcgcca aaaagccccg gcaggcaagc cggggaaagg gataaattgc
     6061 acgctcatag cagcctcagc agttggtcag cgcatcaccg gcacgggatg tgcagtaatg
     6121 ccggggtgaa tcagaggctg cggccagcag ttgatcgcac aggctgaggg tttcccgttc
     6181 atcgagtgtg gtcgactgac cggcgatagc taaggtgatc atgcgtgatt ctcctgttga
     6241 cgggcggcga tacgttcagc cacccaatga tgaatttcgg actcaaccca tgcaacgttc
     6301 ttcccaccca aaggaacacg ggcgggaaat gcattgcggc tgctcagttc gtacagcgtc
     6361 gagcgggaaa taccggtgac gtgcagcact tccggcaggc gcattaagcg ctctctggct
     6421 ggagcctgtg gcatcggagg cactgcggga aggggggctt ggggtgtggc tgacaacatt
     6481 gggcgctacc tcgttaatgt ccgcccggct ctggccggat ggcgctggat ttatctggta
     6541 gctcgctatt atgtgaatat ttgcagtggt ggcaacaagg ggaaaaaagg agattgatgg
     6601 acaaaaagcg gtcgggaact accgtcaatt ctcaacgttg cccaatattt gccaatataa
     6661 gtcaatttta cacattcgat aaaaatcaaa ttattggtgg ctatttatat ggcctgaatt
     6721 gatagtaaaa aacatctgaa aaccgctcgc cagaaaaaag cgccaacaat tcaggtggac
     6781 agtatgaaca ccgggtgatg agtgttatat ccactcttca tccctttatc tattgattta
     6841 tctgtttttt ctctcaggtg aagagtagtg aacagtttta taaaagtgtg gcggttgata
     6901 gagggaggca acctgtcata aacacgctct tgtgtgggaa tgggcacaat cggcccagat
     6961 agcggcgttg tgtggtgaat tgcaccatag ctgccagatg ataacccata cggagaacga
     7021 ctatgagcca gacaacgcca caaagtgata tcccagatgt tttgaaaaaa atggctgaca
     7081 actatctgaa ggcgcgagaa gctcacctcg ctaacgccag tgaactggat aacatcatga
     7141 cggcgatgag gcgagccaaa gcgcagcaga ccgctaccga agcagaaaat cagctttctg
     7201 ataccgaatg gcgcgcccgt tttctcaaag cgcgtgggga aatgacggag gaactgaaag
     7261 ccctgcagtt acagcgtctg gcacagcgcg aactggcgca cgagtatgat gggttgctgg
     7321 cgcagttgga aatcgaccag ctccggcagc aggcaacgtg ccatgcatcg gccaaagcgt
     7381 gctgtaatgc acatgccagc gcgctgcgtg attacgccga gtgggaatta agccaggcgt
     7441 tagaccgtat cagtacagcg ctgattcggg ccatcaagtt aaagcagcac atgctgggta
     7501 tcaccacgtc tgaatttacc gaaggacttt cctatcaaaa acccgataaa gtggtcatgg
     7561 aacaggtggt caactgcctg atagccaagt cgaataatta tcgctttgaa atggataacg
     7621 agccagtctt gtccgtgctg gggcttgatt caccttcgtt gccacatgca gattttcccc
     7681 ccgtggcaaa tccgatcgcc cgccatcgtg cgggcttttt tttgaggctt ttcctctggc
     7741 tagcgctttt ttgatcgtgc atgtatacag tgcatgaatt tgcatgtgaa acttacctct
     7801 caattagccc tgtcgcgcca gtattggcac ggcctgagcg acttcatgca actgcatgaa
     7861 aactgctaca taaagtgggt aggcgtggcg ggggcacaat tgcgcgcggg gagtttttca
     7921 gtgtatggct gtgactggta tcatttttat attcaaatga actataggta aattagtata
     7981 aatgatattt tatgattttc atcggatatt aataaaaacg ttatatactc atcatacttc
     8041 aagttgcatg tacgttggct acgttcagtc acccgaatca tttacctgat taagctcgtc
     8101 gtgatcacct tcacttgcta ccttcttgca actcgaatta tttaggatat atatagttat
     8161 tagactacac attagttagc tcaatgagga aaaatatgaa aatatctttt tttggtgtaa
     8221 acaactttag agctatttca ggtggcattg ataataacaa aataatattt aaagatacca
     8281 atactctctt tgtttatggg gcaaataatg tcggaaagtc aactttttta aaggcatatc
     8341 tattttttta tagtaatgaa aaacctataa gttcttttga ttgagggtcc aactgaagag
     8401 ataatatcta gagctttctt tcaagagttt ccgccaaaaa aaactatatt tgtattaaac
     8461 tgtggcactg ttaataatat cccattctat cagaaaatat tttcacgttt taatataaaa
     8521 tatcatgtca tttgtgatac agataaagcg aaaatagttg aatatgatca ggctggtaat
     8581 cctagttttg attctggaat acagaaaaca atctctgatc aatataggtc tgattatgat
     8641 gtaacgaatg gaaatatagg gttacttcga gttcataatg taacatttga accagcacat
     8701 caaaatgtag atattccaga aatactacgg tttgctgatt ttggtgatag aagtaaacca
     8761 tttaatgcga acttgtattg gaaaaatgta ctaaaaccaa acattgccca tcaagatata
     8821 aataaagttc ctattatacg gtatttaaaa gagataatgg cccattaatg taaaaaggct
     8881 gagcgatata tgctcagccc ttctatttat gcacacctaa accccaccaa tccatcaact
     8941 ctttcctctg ttcaaggtag gtagagcgat tataagcccg tctaacctca ttcttatcac
     9001 aatgcgctaa cgccgattca atcacatcag gattaaaacc ggcttcattc atggcggtgc
     9061 tggctattga gcgtaaacca tgagcaacca gttttccacc gtagccgatg cgttttagtg
     9121 ctgcgttggc ggtctggctg ttcatcggct ttttaggatc gttacggctg gggaaaacat
     9181 aatcccggtt gccgctgata gggcgcatga tgtcgagcag ttccagcgcc tgttcgctga
     9241 gcggcacaat atgatcgcgt ttggctttca ttctttcagc cgggatgctc cacgtctttt
     9301 tctcgatatc gatctcagcc catgctgtgg cggaggcttc agccgggcgg ataagtgtca
     9361 gtaattgcca ttccagcaag cagcgggtag gaatggagag attagacatc gcaatggtgc
     9421 gcatcagcgc gggtagctct tctggccgga tggtcggcat atgctgtttt ttagggcgct
     9481 cgaaggccat accaatacca gaggcggggt tagcgtcaat cagcccggtg ttaaccgcgt
     9541 aaaccatgat ttcgttgatg cgttgtacta accgcctgac ggtttccagt gcgccacggg
     9601 ctttaatcgg ctccagcgct tgtatcagtg tgcgggcttt gatttgctgc acggggatat
     9661 tttcaatcgc cgggagcacg tctttttcca gtgatcgcca aatgtctttg gcgtggtcgg
     9721 tgctgactgt agcctgtttc agcgtgaacc agctacgcgc cacattgatg aaaaggcttt
     9781 ctacggcgat ttgcgcttct tcgacttcct tagccacctt ttcctgtgga tctattccct
     9841 tggctaacaa cgacagtttt tcgtctctca tggcgcggac atcggctaat gacaatgccg
     9901 ggtaagcacc aaacccaatc atggtacgtt ggcctgtggt tggtttctgg taacggaacc
     9961 gccacagttt tttcccggtg gttttgacta agagaaatag cccgttgccg tcatgcagcg
    10021 ttaggtcttt atctgccgct ttggcttttt gcacttcgat gtgggtaagg gggcgagttg
    10081 tccgtgccat tgggagatat ccttaatgat tggtatacgc tttttggtat atatcgtacc
    10141 gtataccaat tcgtatacca atcatcagcg gatttagccg gatatcgtcg gataatgatg
    10201 gaaacaaaaa agcccgcaaa cctaggtggg atgcgggctt taaggacttt ctcggacgta
    10261 tccggatatg taagtggtgg agctgggggg agttgaaccc ccgtccgaaa ttcctacatt
    10321 ccttctggta ggtagtaaaa acaacaaatt acaataaaaa caaaatgtta ttttgtgatg
    10381 agtggtgagg aaaaggcttg attgccattc gctgccgcca acttgccgcc attttttggc
    10441 gaccagttca ggccgttgag tgggttttta gtgatggcgt cttccagatg gtcgggcgca
    10501 aagtgggcgt agatcatggt cattttgatg tcagcatggc cgaggatatc acgcagcacc
    10561 agtatattgc cgccgttcat catgaaatgg ctggcgaaag tgtggcgcag tacgtgggta
    10621 cattgcccgt caggaagctg aattcccgtc cggttaatgg cgcgctcaaa ggtttttcgg
    10681 cagggagaaa acagcttgcc gcttttacgt gggatctcat catacagttc acggctgatg
    10741 ggaacggttc ggtttttctt gcccttggtg cgggtgtagg tgatgcgata aggcgtgact
    10801 tgctggcctg atagcccttc cgcttcgctc cagcgcgcgc ccgttgccag acatattttg
    10861 gtaactagca acagatgagg gttagcagat tcggcgcacg catccagtac gcgctttatc
    10921 tcattgggag ccagaaacgc cagttcctgt tgcgctatct tgaatgttgg caagccggat
    10981 aacgggttgg gtgcgtccca gtggcccagt tttttcagtg tgccaaatac ggcggataag
    11041 ttgcgctgtt ccagattgac tgtgcgcggt ttgacgacag acagagggat gccgcttgcg
    11101 tcagtcatct gcccggctaa ccgcagttcg cggtaatgcg cgaaatcggc ggcgctcagt
    11161 tctctggctt tggggttgcc taaaccggtg cagatgatat caagtttcgc catcatcctt
    11221 ttagggtcgg ccagtgtgcg gccgtaaaga gaaaaccaca gatcgataat ctcccgcagg
    11281 ctgcggttat ctgctttttc accaagccag ggcttgtttt cactctcttc catcgtgaag
    11341 cgctcaaatg ctaacgcctc acctttggta gcaaactgct tgcgtacccg cttgccttca
    11401 cgcccgaatg ggtagcactc acacaaccat ttccctgatg ccaatttacg aacagccata
    11461 cacccccctg taaactgagg gtggcatatt tactgtgtat aaaaacagta atcaatgtat
    11521 ggatgttgtg agagcaaaca aatggcgaaa ggtggccaag gccaccttta gaggtaacgg
    11581 taagactgag gagcggtgat gttttcacct aatgcactga gttgcagcgg cgtttcaggt
    11641 agaactgtca ttttttataa tcctttataa aaacctttgc attcggcaat aatttgaata
    11701 tcacccagcc cacaatcaaa ctccgcccca gccccgctaa cgcgcacttt ccctactggt
    11761 atacgggtca gatctctgat gctggttcgg ccttcaattt caaccagcca cttaccatca
    11821 acaacctcgt caaactggcg atcggcaatg taggttatgt ctccatccag aatgacaacc
    11881 gggtctttca gtccatcgga cagaaaagcc ttatcaaaca tatagtagtt tgaatcgtag
    11941 agttttccat cgatcagctt ttgccttggt atagcgatca cgtcatttct tgcgtcatca
    12001 aactttgggc cttcacctgt agcgagccag cgtaaagata cgccggtttc taaagccgcc
    12061 tgaatgaccc aatcagcagg aaaagagtca cgcatgtatc tgttagctaa agtgcttttt
    12121 gatacaccga gatggtcaca tagagcctga cgattcttaa aaccatacgc ctcgacaaga
    12181 cgctcaatcg ctgcctttgc accagtccca aaatccataa agttcaccaa atgtatactt
    12241 ttggtttgac taaaaccaaa agtgatcgta aatttcgctt gtacacaaaa agtggactga
    12301 tcacagttca caacggctca ccacaagcca atagggaatg ttgcattatg agacctcaaa
    12361 tatcaatcac cctggccgtg ccgtctgtct cgattgagaa atacagcgag ctgaccggcc
    12421 tttctatcga caccatcaac ggcatgctgg ctgatggccg cttaactcgt caccgcctgc
    12481 gcaaagataa aaagcgtgaa aaggtgatga tcaacattgc cgctatgacg gttgatgcac
    12541 tcgcagattg tgatatttcg ctcaattagt tcgatattga gatttttgga gttcacaaac
    12601 catgtttgat taccagatca ctaaacagac gcactttgat gaagcctgcc gggccttttc
    12661 acttcgtcac aacctggcgg agctggcacg cacggcgggg atgaatcagc aaatcctgcg
    12721 taacaagctg aatccggatc aaccccacaa gctgacctgt gaagaactgc tgacgctgac
    12781 cgacatcacc gaggatgcca cgctgatcga tgggctttta gcgcaactga actgtctgcc
    12841 agcggtgcca gtgaatgagg ccagagcaga acggcttacc gcctatgtgc tgcaagccac
    12901 tgccgcagta gggaaggtag ccgccgaaag cgtatcggat gagcgtatga cgcagacacg
    12961 acgccatagc ctaatgagca ccatcagcga cggggtgcgt tacctgtcgc tgattggcct
    13021 gacggtgcag tctcgcattc aggctaaccc ggcaatggcg tcaacgctgg atgctctgag
    13081 cgggttaggc gcatcgctga caatcggata agaacaacac cagggaaacc acgcgccggg
    13141 cgtggtgaaa catcccggca cctatttgca accgtctgaa aacaggcggt taccaatggg
    13201 actgtttgga gtttttatgt caaatcacaa cccggaaata tggctacagg ccgccgatga
    13261 tgctgcacag agttttttat ctcaacctgc tgatgtgcga gagaacggaa gcgacaatgg
    13321 ttacaaccgg attagcgttt tgtcgtcgat ggagtcattg gctgatgctg tctattacct
    13381 caatcatcct ctgtatcaat ttatcaagag ccattcgaat caatggtttc gagatggaat
    13441 gacgcaggca ccggaattca ccgcaagttg gatgtgtcgg cagcaagggt aaagcataat
    13501 caggagggaa tatgtctcaa tctgtcgatc atcagaaatg gatacagcgt tgccgggata
    13561 tcgtgtttaa aggtgaatcc cgcgctcagt cattttggga gcgggctgcg ctggataccc
    13621 gtgaaattat cttgttttct gcaaagccaa agctgaaatc gcgccatgtc aattactcat
    13681 ggcatcagtt tacggcggaa gagcgggcag ctatctggag cgcaattaag cgcatccggg
    13741 ctatttgcga tgaaaccgcg ctatttggcc cggatgattt tctgaaaacc agtaatcaaa
    13801 acggcacccc gaatcagccg aacccgtcac ccattcatta attaacccat agcaacgaat
    13861 aaatgccctt tatcgggcag ggagcatcag tttacggcgg aagagcgggc cgctatctgg
    13921 agcgcaatta agcgcatccg gtctatttgc gatgatttcg tattacctga aaaaaggaaa
    13981 acgtaatgaa aaatgccgaa gtaaagacca tgaccgtcgc tgctgatggc gcactgatcg
    14041 aactgctgaa taaagccaga ctggaggagc gcaaagacca gcatttgtcc ttctcactgc
    14101 gtcttgctgc gctggctatc cgcgcccagc aaagagatct ctctgccgct gaactggtgg
    14161 aactgatgcg ccaggagttc gtattacctg aaaaaaggaa accgtaatga ttgcaaccaa
    14221 attaaaaccc atgaatgccg ccgctgatgg cgcactgatc gagctgctga ataaagccag
    14281 attggaggag cgtaaagacc agcatttgtc cttctcactg cggctggcgg cgctggctgt
    14341 ccgcgctcaa caacgcgacc tctccgccgc cgaagtggtg gaactgatac gtcaggaatc
    14401 agaacgtttt gagcactccg ctcaggggtt gagctgatgg actccatgga tatggctcag
    14461 gaacgcgaag cgttcatccg tgaaacacaa atccaacagg cccggcaaca gtcgggttgt
    14521 gccgtttctg cattcgtctg tgaaagctgt gacgccccta tcccggaagc ccgccgcgtg
    14581 gccgttccgg gtgtgcgtct atgcgtgtac tgccagggcg atgctgaatt gaaaaacaaa
    14641 cactataacg ttttgagcac tccgctcagg agttgcactg atggccaaca gtatcaggga
    14701 gaacgtcagt gacgagctgt tgcgagaaat ctgcaacggc tcgccattca ccggcgcgtt
    14761 tgaaaatgag gtcgttgaga tggctcgtga attaattgaa ttcagaaccg cagcggccag
    14821 agacatgcag aaattagccg atctggagcg ggctgttgag gtgttgagcc acaaggttgg
    14881 ttctgtatcg atatcgcggg gtgccttatg agcattatcg ccacaccgct gaaatgggtc
    14941 ggcagcaagg cccgcgtgat ggatatcctg cgcgagcatt taccggccgg cgatcgtctg
    15001 gtgggcccgc gtgatggata tcctgcgtga gcatttaccg gctggtgatc gtctggttga
    15061 gccgttcgcc gggtcttgtg cggtcatgat gaataccgat tacccggaat acctgatcgc
    15121 cgatatcaac cccgacctga ttaacctgta tcaggtcatc aaagaggatt tgaaggattt
    15181 cattgatacc gccgaaggtc tgtttcgcac ggcgaataca gccgaaagct attaccgctt
    15241 ccggcaggta tttaaccgca gcaaagaaaa tcgcatcacc tcagcggcac tgtttcttta
    15301 cctgaaccgg cacggctacc ggggcgtttg tcgctataac cgcgccggtg ggtttaacgt
    15361 tccttacggg cattatgcat cgccttattt tccacaccag ttatcacacc gatggtttca
    15421 cccgtaacga tcagtatgac ctgtgcagcg cgttattacg cctggctgaa cgtgggatac
    15481 ctgtcatcgc ctccaacagc gacacccacc acgcacacag catttaccac cggtttgata
    15541 tctgccgctt caccgcaccg cgtagcgttg gtgttgcggc aggggagagc aaacaggccg
    15601 gggaaatcat cgccaagcgt ctgccggtgc ctgtcgccag caacatagcg aaggtttgcg
    15661 acgggtgcgg ctatgaaggt ggtgggcact gccctgactg tgggccggtg atgggcgatg
    15721 ccacctatca ggaaatggtg gcatccggtg cgttggatgc ggatccattc tgatgcagcc
    15781 attggcctac tacaacgaaa tcgacccatt cgctgcccaa tggctgcgca acttaattga
    15841 tgccggccat atcgcgcccg gcatcgttga taccagatca attgaggatg tcacccctaa
    15901 tgaccttaaa ggattcagcc agcaccactt tttcgccggg atcggcgtct ggtcttacgc
    15961 actgcgtaga gcaggatggc cggacggtca accagtctgg accggttcat gcccttgcca
    16021 acctttcagc gcggcgggca aaaaaaagag ggtttgccga tgagcggcac ttatggccca
    16081 gcttttaccg gctcatcagc cagtgcaaac ctccagtcat ttttggagag caggttgcga
    16141 gcaaggatat cgatgtgtgg atcgaccttg tacaaattga cgtggagaaa atgggttacg
    16201 cctttgggtg tgtgccgttt ccggctgcga gcctcggtgc tcccaatatc agagagcgag
    16261 cgtactgggt ggcctactcc aaggacttgc aaaaatgggc accgaaaggg gaatccgagc
    16321 agagcaatca aaaacaaggg gaaattagag gatgcaatat tcctcatcct gcgaagtcag
    16381 gaaatccagt tagctactgg agaaattgtg tttgggtgcg tggggctaac ggacgactat
    16441 tcccagttga gtccggaaca ctgccgttgg ttgatgggga taccaaaaga gtggggcgaa
    16501 ttagcgccta cggaaacgcc atcaacgcgg aggcggcaaa agcattcata gaagccgcag
    16561 ctgattatat gtctgcgtac tcgctcgggg tctgtgagtg actgatttac agatcccgga
    16621 gcataacggc gcgaaggtca cgctgtcagg gaatgacagc gagagcagtt ttaccgcttc
    16681 cggcaggtat ttaaccgcag caaagagaaa tcgcatcacc gcagcggcac tatggcttta
    16741 cctgaaccgg caaggttacc ggggcgtttg tcgctataac cgcgccggtg gatttaacgt
    16801 cccctacggg aattacgcat cgccttattt cccgctggcc gagattcagg catttgccga
    16861 aaaagcccgc cgcgcaaaat tcatctgtgc tgcgtttggc gaaacattgc aactgatccg
    16921 caccggcgat gtggtgtact gcgaccctcc atacatcccg caaacgccaa cggccagctt
    16981 caccagttat cacaccgatg gttttaccca caacgatcag tatgacttgt gcagcgcgtt
    17041 atcacgcctg gccgagcgcg ggatccctgt catcgcctca aacagcgaca ctcaccacgc
    17101 acacagcctt taccacaggt ttgatatctg ccgtttcact gcgccgcgta gcgtcggcgt
    17161 tgcggctggg gaaagcaaac aggccgggga aatcatcgcc aagcgtctgc cggtgcatgg
    17221 gcagcgaggt gcagcataat gagggctatc gatctcttcg ctggatttgg cggctcatca
    17281 accggcgcac gtatggcggg agtgcatgtg gtatgggctg ctaatcactg gcccgctgcc
    17341 gttgaatatc atcgtttaaa ccatcctgat gcaatccacg tttgtcagga cttgcatcag
    17401 gctgactgga gttctgtccc ggcacatgac ctgatgatgg cttccccttg ctgtcaggga
    17461 catagccggg cacgtggaaa agcagcaggt aatccgcagc acgatgcgag tcgctcgaca
    17521 gcatgggctg ttgtgtctgc cgccgaatat cacaagccct cagcggtgat tgttgagaat
    17581 gtgcctgaat ttctaaactg ggcgttatat ccggcatggg cggcagcaat ggcagcgttg
    17641 ggttatgcat tatcgccaca tattgttgat tgtgccgatc tgggggttcc tcagaatcgg
    17701 gtccgcttat ttctgatctg cactcgtagt cgttccccgc tattactcga tctgccacgc
    17761 atcggccatg ttcctgccgc ctcgttcatt gattttgaag gtggtaaatg gtcaccagta
    17821 aatcgtccgg gtcgtgcgat atcaacgctt gagcgtatcg aaaatgggcg tcagcaattc
    17881 ggcgatcgat tcgtttttag ttactacggc aatacaaaaa caggccgcag cctgagccga
    17941 cccatcggaa caatcacaac cagagacaga tgggccatcg tggatggtga ccgtatgcgg
    18001 atgatgacaa agcgggaggt actggccgca atgtcttttt cgtcatcgta tatcacgcca
    18061 gacagtcacc gcctgaccgt caatatggcg ggtaatgctg tgccacccgt tgccatgtgc
    18121 cgggttgttg gggccatagg gggttgtctg tgagcattct gcaactcgcg gtgatggggg
    18181 aatatttcgc cgcaatgaag gctgggctaa agccctttga gtaccggttg gacaatgctt
    18241 actggcgacg tcggctcatt ggtcgggatt atgagcaact ggtgattaca tggggctatc
    18301 cggcccgttc tgatatgtca cggcgtctga tcctgccttg gcttggctat gaaatgcaga
    18361 cgattacaca tccgcatttt ggcgataaac cggtaaacgt gtttgccata cggataagtg
    18421 acggggtttg tgagtgactg atttacagat cctggaacat aacggcgcgt atcacgctgt
    18481 cagggaatgg cagcgtgagc agttctcccc cggtgaaccc gccgggctga gtttcgttga
    18541 gcgtagtcta tggcacctga ataaaattga tcatgattgg cgtcagcagt acctggccgg
    18601 aatgccggat tatctggcga agtatttcgg ccagcgttat gaaaagctgt ttacatccga
    18661 tgagcacaag ggccgccgcc gggccaatac gtttttactc cgcaccctgg ggaaaagcgt
    18721 attgccacgc ctgcgcaccg ttaccgaacg ataccagacg caacagcgtg cggcgggaga
    18781 tctgccgttc ccattctacg atgatctgga aaagctgccg gtttatgacc gtgacaacat
    18841 ccgcgccctg tcacagcagg tggccgactt tatggctgca tcgttgcgcg attacaccga
    18901 aaaccgcatc aggaacactg gggagctaac tgacaggtac atcaccctgc tgtcattccg
    18961 tcaccttggc ctgctgacct tacaggcagg aactcagccg ccctactggg cgcaattcac
    19021 caaaggccgc cacccgttat ccactgaaaa agctgaatcc ggcttgctac gcatgatgtc
    19081 accagagtgg tggcgggcgc gtctaaagcg ccgtcgtgat atccagcggg agcatatggc
    19141 tatcgcggtc ggccaggtgc aaaaagcggc atcaccctat gtctcccgct ccacgctgga
    19201 tgaatggaaa gagcagaaac ggcgtaaccg agagtttttc aaggcgtttg agctggaaga
    19261 tgaagagggt aaccgtgttt ctcttgatga catggttaat gccagcaacg ccaacccagc
    19321 gccgagagtt tttcaaggcg tttgaactgg aggacgaaga gggaaaccgc gtctctctgg
    19381 acgacaaagt taatgccagc aacgccaacc cggcaatccg ccgttgtgag ctgatggtga
    19441 gaatgcgcgg ctttgaggat ttggcgcagg aaatgggctg cgccggggag ttttatacca
    19501 tcaccgcacc gtcacggtat cacgctgtac acagcggtgg cgggtttgtt gaacagtgga
    19561 gtggtgccag ccctcgcgac acacagaaat atctgtgcgg tgtgtgggcg cgtatccggg
    19621 cggaactgtc acgcgaagag attagcgtgt ttggtttccg ggtcgtcgag ccacatcatg
    19681 acggcacgcc gcactggcat ttattgctat ttatgcgccc ggagcacatc gaacaggtgc
    19741 gcgacattct ggcgtatcac gcccgccggg aagatgccga tgagctgaac agcgaaaagg
    19801 cgcaaaaagc ccgcttccac tatgaaccga ttgacccgga aaaaggcagt gctgtcacga
    19861 gtttatcaac gcgtgtaaac tagaggacga agagggaaac cgcggagcac tggacgacaa
    19921 agttaatgcc agccaacgcc acacacagaa atacgccgtt gtgagctgat ggtgagaatg
    19981 cgcagacggg aggaactggc acagcaaatg agatgagccg gggagtttga taccatcacc
    20041 gcaccgtcga gccacatcac gacggcacac agcactggcg gatttattga acagtggagt
    20101 gatgccagcc ctcgcgagca cacagaaaca gctgcgcgac atcagggcgc atcacgcccg
    20161 ccgggaagat gccgatgagc tgaacagaga aaagcgcgca aaaagcccgc gtccactacg
    20221 agccacatca tgacccggaa aaacgcaccg ccatttaggg ctattcatgc gccctaagca
    20281 catcgaacag gtgcgcgaca tcatggcgta tcacgcccgc cgggaagatg ccgatgagct
    20341 gaacagcgaa aaggcgcaaa aagcccgctt ccactatggc cgattaaacc ggaaaaaggc
    20401 agcgccacgg gttatatcgc caagtacatc agcaagaata ttgatggcta cgcactggat
    20461 ggcgaggccg acgaggaaac cggggaaaac ctacgcgaca tggcaaaagc ggtatcagcg
    20521 tgggcatcac gctggcgtat ccggcagttt cagcaaatcg gtggcgcgcc ggtgacggtt
    20581 taccgcgagt tgcgttatcc ggcagtttca gcaaatcggc ggcgcaccag tgacggttta
    20641 ccgcgagttg cgccgcctgg gtgataagca actggataac gcggcgatgg atgcggtact
    20701 ggcggcggca gacgtgggcg actgggcggc atacacacag gcacagggcg ggccgttagt
    20761 ctcgcgtgat gcgttggtgg tgcgcctgtc ctatgaagtg accgagcgtg ccaaccagta
    20821 cgccgaagat gtgcaaaagg ttcagggggt gtactcgccg ttactggggg cgcactccgc
    20881 aattatcacc cgcacggtgg agtggaagat tgtcccgaaa caggccgccg cgtcagcggg
    20941 ggccggggtt tctggcggcc ccgccgccgc ttggagttct gtcaataact gtacgccggg
    21001 tttacggcga cgattatcgg aattgttgcg cttaagaggt tttccgcctg atccggtgct
    21061 ggtcgatgtg ctgatccgtg gcggcaatct ggcaatgagt gagggcaggg cgctgaaaat
    21121 ggttaacggc aggctggagg aagtacggaa gacgggagat tgcgagctgt ggacggggtg
    21181 gaactgggaa tcataggcgg taatgactgt atttgccggt gtgctggatg cgtatttgta
    21241 gtccggatcc ttgcaacaca gacggtgtta tctgtgttgg ccataactgc gctgcagtac
    21301 agacggcgat atctatgtgg taccacaagg gggagttatg ggctatctgg ggagtaaggc
    21361 cgcgtcgggt gcatatcaga aaattatcgc agcgatgccg ccgcatgaca catatataga
    21421 gactcatctg gggagcggcg cggtgatggt gaggaagcca gcagcggtgc ggagcgtcgg
    21481 aatagatatc gacggtgagg cgttgagaca tttttctatc gggcattcta tcggggcggg
    21541 cgggttgcaa cacgttactc tgatcgatgc tgacgcggtg gagtacctgc gcgagtttga
    21601 ttttgctagc gcaggtcagg tgttgatcta tgccgatccg ccatatctgc cggaaacacg
    21661 taccagccgc gcgcgctacc ggtttgagta tacagttgaa cagcataggg agctgattgc
    21721 agtgctgcgc agtgtgccgg ccagcgtcat gatctccggc tatccgtccg cgctgtacga
    21781 tgagttactg ggggattggc ggtcaatcac gtttcaagtg atgacgcgcg gaggggtgcg
    21841 cacggaacag ctgtgggtga attacccgga gggagcggcg tacgatgcca catttgcagg
    21901 tgagaactac gttgatcggc agcgtattaa gcggaaggcg cagcgctggg ctgataatta
    21961 ccgggcgatg tctcggccgg aacggctggc gatcatgtcg gcgcttcagg gtgtcgatgc
    22021 atcggattgt taagcatttt tttagttatt ttttgtcatc ttttcgcgtg attcgtaatc
    22081 acagataaaa acactatttc aattatgtaa tatttggaat tgaaatttat gcttagtaat
    22141 tattatactg tacctatata cagttgtaca gtgaggtgcg atgtgttagg aagtatggaa
    22201 gtatctgttt ttgttgagcg tgttggattg ttagcaaaac tgactgagca tggcggtgct
    22261 gatgaacatg ataaagatgt ggcgctggca tggattaatg aaatggttaa tgaatttgtt
    22321 tcgcgcgagg taaatggttt cgaaagggaa tgattagata aaaaataatt aacatattaa
    22381 gaaacccgct gtaagcgggt ttctacttta cgtgatgagt gtaagaaatg tttgacgtgg
    22441 atccgtgaca tggttgcgga gtttgctgat cgcgatggat gttgtgcagt tggccatcaa
    22501 tttgataatt caggctgcta taacacataa ttagataaca aggttgaaca atgagccttg
    22561 cgaggcgtta gaaattgtct ttgttagtgc ctacttctca taagaggcac tacatatgct
    22621 aaatgcaacg cgttaaggca gaaacatctt gcgcgattag gggcaatgaa cttaagttaa
    22681 gtaacgcaac caacagttaa aaaggttgtc ttagttataa ggaatttgct gttgtggttg
    22741 ctggtgacga agtgtacaat tccgcgccgt ataaaaagga gggggttatg tcaagtatcg
    22801 ccgcattgag gctgggtaat ccagttgaac gtttggcacg ggttctaaaa gagaatcagg
    22861 acaaactcaa tctgagtaaa gatggttttg tgtccgtaga tttgtccaac gaagaagctt
    22921 tgaaagccat cagagatcag atggataagc ttgaaggcat caaaacgagc accgttaaag
    22981 caaaacatta ttacagaacc cgataatggc aacattactt ttagcagtga ttttggttag
    23041 cggtttttta tatgtaaacc tatcactttc aacacgatac agatataagc gttccaacgg
    23101 ttgggacgct tatttttttg tggctgcatg gggaatcgtg tttttccttg ctggcggctt
    23161 tcttaccttc gctcttaaca tcagcggtgg gtttcgctgg ctctctaatg cgctgaacct
    23221 aacgcccgac agctttaacg ggatgttatc cgccacaacc gatagatcac agcgtatcaa
    23281 tgaaattaag cagattgcat gggttgtgat ttcaatagta ctggcggccc tgttcggttg
    23341 gcttaacaaa cagcgtactt caaaaggtga tcgccgttgg gatgcactgg caaaggccgt
    23401 ggggaacaat gcttttgagt cactgctcat ggaagcatcg gcgcgtcagt tccctatcat
    23461 tgctacactt tcatcacgca aaatctatgt aggtctggtg acttgccctg cgctggaaaa
    23521 tgggttgtcg gaacaccttg aaatactccc catgctgagc ggctatcgtg ataaagatga
    23581 cctcacgata agtatcacga ctaactacca tcagcactat cttgaaagtg gcatcattgg
    23641 tggaatgtct cgtctgaata ttcaggattt ccgcgtgctg attccaaaag atgaagttga
    23701 aactatctcg ttctttgaca ctgaaacgta caacaaattt aaagaagatg aagcgcgaga
    23761 cagaaaaaac tgccgcaatc tgggtggcaa aaagccatca acccgcaggc gaaggactac
    23821 tgacgatgcg gaacaggata gtgcatgact acgccgcatg agatcgcatg atcgtttgag
    23881 gatcgttttt gctgaggccc gccagaactg gcgggctttt gcttatgttc atgcaggtgc
    23941 atgaaaacca ctacgcaaag cgggcaggcg cggcggggcc tcgattgcgc gcgctggggt
    24001 ggtatttggg gtttcggtcg cagatctgcg ggtgaggagg ggcagggcgg gggcaaaaaa
    24061 aaccgcctgg cggcggtcgg gtctgggggc tgggtggtgc ggttacttgc tgatggacac
    24121 agagaggttg ccgtcttcaa cgtcgagctg gtacgagtca aagcgaatca cttctattcc
    24181 cgcccattcg tttaacgcca ggatctggcg ttgcagtggc atcagttcat tgcgtacaaa
    24241 aactttactg gctttgccga cgtccccaaa cccccctaca ttattcggga tgatgcccat
    24301 catctgcggc ggtatgcggt gtgcggccag catgtcatcg cggctgacgt tcttgatatt
    24361 cagaaactcg tctttggccg ccacttcgga caccgggatc accttcaccg aatccggctt
    24421 gccgttcggt gagtacagaa acaggttacg gaagttgccc ggccctttgg cgcttttcat
    24481 ggcctggcgg atgttgttca cgtcttcctg attctgctgg ccgtcgctca tatacagaat
    24541 aaaaccggcg tgactgccgt tcaggtaata cttacggcgg aacaacgtgg cggactcgtt
    24601 aagtagtgcc gacggaatgg cggacaggta ttccggcagg ccgtagattt cctgccccaa
    24661 atcaggctcc atcaaatgaa acacgctgcc cggctcaaac gcatacggct ggctgttgta
    24721 gccgtagcgt gcaaaccagt aggtgtctaa atccagcccg cgccgggtgt atttcgccaa
    24781 tgtcggttgc agcgacaaca ggccgccaag gcggttggtt cgcatctcca gatacgcatt
    24841 gccgaacacc aggtaatcct gcacaaaccg gctgaatgcc tgctggctta acagcgggtg
    24901 agggataaag gtgctggtca ggatgttacg cttcacgaaa atcggtgagc tgtggtgtac
    24961 cgccgcccgg aacgtccggg ccagaccctc gaagcttacc ggcggttcat accagcgatc
    25021 ggtgcgcacg cattcgatat agtccagcaa ctcgcgccgg tcgagcaccg ggatcgggtc
    25081 accaaaggaa aaggcttcca cgcctgccgg gccagtcggg gcggcggcca gcgtagcggg
    25141 tggttgcggt ttgcggcgtt tcgccattag aaaatctcca cgatgttatg gctgttggca
    25201 ttctcgcctt ccagcggttc attaaacagg gcgtgcatgg tggcccaggc caggtcggca
    25261 tggctggctt cctcgctacg gctcgcctca tacgttggac ggctaccgct ggcggtcatg
    25321 gccttgcgga tggacataaa ggattgggcg atatcggtgt ggccggcgtc gaattccagc
    25381 cggcgatggc tgatcacgtc ataggctttc aaaaccaagg cgtttttgac gtttgggttg
    25441 tagacgaatt cccgcgccgc cgggaaaaac tgtttcacat tctgatagac gccgtggccg
    25501 acgccggtcg agtcgatacc gatatacgtc acattgtact gttcggtcag ctttctgatg
    25561 gcttccgcct gggcgcggaa gtccatccct cgccactggt ggcgctccag aatacggaac
    25621 ttaccgccca gcgcctgcgg cggagccaac accacacaac cggcgctgtc gccgttctgg
    25681 gttcccttgg ccgggtcgta accaatccat accgggtaac gcccgaatgg ccggagcagc
    25741 agcggctgga agtcgtccca cacttcccaa ctgtcaacca tacacgcctg catatccgag
    25801 agcgggaaca cggacgccag gtcgtcgata aaatcgcaca tcagcaggtt ttgatagtcg
    25861 gccgggctgt agcgcaggcg caactgatcc aggtcgaaca ggttacagcc gccgcgcaca
    25921 gcgtcttcta ccgtgactat ctggcggtat tgcccgtccg gacacagtac gccaggggac
    25981 aggtgggcgt gcgtcaggtc aatgtcgata cggtcggcct tggcgcggcc ccggttaaac
    26041 agggtgccag accagaacgg ataggcgctg tgggtcaggc tggacggcgt ggaaaaatag
    26101 gtctgccgcc actgcttgtg taacgccatc cccgacgcca ccttttgcag ttcctgaaac
    26161 ttggggatcc agaaatattc gtcaagatac aggttgccgt gatagctctg ggcggtgcgg
    26221 gcgttggtgc cgagaaaata caacgtggtg ccgttgggca gcgtcatcgg gtcgcctttc
    26281 agttcgacgt caacctcgcg cgcaaactca atgatgtatt gcttgaatac gtgcgcctgc
    26341 gctttgctgg ctgacagaaa gatctggttg cggccggtgg tcagcgcatc gatcagcgcc
    26401 tcgcgggcga aaaagtaggt ggcgccgatt tggcgggatt tcagcaggtt gcgaacggtg
    26461 tatttattgc cggcttccca ccagtgccgc tgatagtcga acatgccacg atggaacaca
    26521 tcgaccagtt tctctatctg atcgtcggtg aagacgttct tttccggcgg cttgcgcggg
    26581 ctgttgttgc ggttcgcaac cttcggattt agatcggcct cgttgccgcc gttattgaat
    26641 ttaccgatgc gggcgtgtcg ttcggcctgc cgggccagca ggtcgatttc cttaaagtct
    26701 ttcccttcct tgaccggctt catgacgagc tggcaatagc gcgccgcggt ggtgagctgc
    26761 atctgatcaa gcgggccgta atctccccac ttgtcgcgct tcttccaact gtgaacggtt
    26821 gcgggtttct ctcccagcat ttcggcaatg cgggcgatac gtaatccctg aaaccataaa
    26881 aacatcgcct gacggcgggg atcgaggtcg gtgtgttgcg ctgtcgtttc catgtccgca
    26941 agactacggc ctgacccgcc cgccgtgccg ctcctgccca ttgtgccgtc tggcgcacaa
    27001 tgcccccgcg ttgtctcggt ccctgctgac gccgcaccct aaaggctctg attgtcctga
    27061 tgaactggag cctgaacaat ggcagcgaaa gcaaacgcac gtcgattccg gatcggcgtg
    27121 gaaggggcca ccactgacgg ccgcacgatt gagcgtgcct ggctggagca gatggccgcc
    27181 aactatgacc cggcggtcta taccgcgctg atcaacatgg agcacatcaa gggctatacc
    27241 ccggacagcc catttcgccg ttacggcaaa attgaggcgc tggaaaccga agagattcag
    27301 gacggcctgc tgagcggtaa gctggcgctg tatgcctacc tcgccccgac cgatgacctg
    27361 atcgccctga cccagaaatg gcaaaaaatt ttcacgtcga tggaggtcaa cccagatttt
    27421 gccgacacag gcgccgcgta tctggtcggt ctggcggtta ccgatgaccc ggcgagcctg
    27481 ggtactgaaa tgctcacctt tagcgccggc gccaagcata acccgctggc cgcccgcaaa
    27541 caggcgccgg gcaacctgtt taccgccgct gaagaaacct cgctggtatt tgaactcgat
    27601 gacaacaagc cgtctctatt cggccgtatc tcagcgctgt tcgccaaaaa acagacctcg
    27661 gacgatgcgc gattcggtga tgtgcatcag gcggtagagc tggtggcaca agagcaacag
    27721 cagcttgccg ggcaggtaca gcagcacggc gcacaactgg cccggctgtc gacgctggaa
    27781 accgacctgc aggcgcaaaa aaccgagctg gcgagcctga aagagacgtt aggcaagcag
    27841 gaccgcaacc cagcatttcg tccgctgtcc acaggcggcg cagatatcgc gaccgttctc
    27901 accgattgct aaggaatttc caccccatga agaaagacac ccgctttaaa tataacgcct
    27961 acctgacgca gcttgccgcc ttgaacaacg ttccggtgga agatgtcggc accaagttca
    28021 ccgttgaacc gtccgtcagc cagacgctgg aagacaagat ccaggagtcg tccgcgttcc
    28081 tgaccctaat taacatcgtg ccggtggatg agcagtccgg cgaagtgctg gggttgggta
    28141 tcggccagac cgtagccggg acgaccgaca cgacccagaa agagcgcgaa ccgaccgacc
    28201 cgacgtatat cgacggcagc ggctacaaat gcacccagac caatttcgac accgccttgc
    28261 cgtacagcaa gatcgacctg tgggccaagt ttcaggattt ccagacccgc attcgcaacg
    28321 cgattgtgca gcgtcaggcg ctggaccgca tcatgatcgg ctggaacggc gtgcaacgtg
    28381 agaaaaactc taatcgcgtg aaatacccgc tgcttcagga cgtcaacatc ggctggctgg
    28441 aaaaaatccg tcaggaagcc ccggcgcacg tcatcggcaa tatcgtggat gacaacggcc
    28501 aggagatttc caggaaaatc cgggtcggca aggggggcga ctttgacaac ctcgacgcgc
    28561 tggtgatggc ggcagtgaat gaaaaaatcg ccgtgcagta tcaggacgac accgagctgg
    28621 tagtcatttg cggccgtcaa ttgctggctg acaagtattt cccgctggtg aacaaagagc
    28681 aggacaacag cgagaagctg gctgcagacc tgatcatcgg tcagaagcgc atgggcggct
    28741 tgcaagcggt gcgcgtaccg ttcttcccgg ccaatgcact gctggtaacg cgactggaca
    28801 acctctctat ctactggcag gacggcaccc gccgccgcgc ggtcattgat aacccgaaac
    28861 gcgaccgcgt ggaagatttc gagtcggtca atgaggccta tgtggttgaa gactacgact
    28921 gcacctgtct gattgaaaac atcacgctgg gtgagtttgc cgcgagtgcc gccgcccagg
    28981 tggctgagaa cggcggtact ccggctactc ccgatgaccc caacgctggg gcgtgacgat
    29041 ggcgctaaac ccgttccagc gtcacacccg gtttattcag ggacaacagg ccgcccactc
    29101 gggcggcacg gcgcggccgc tatccggcta tgaccgcatg ttgatgcaac tcacagaaga
    29161 ccagatgcgc cttaagcgta ttcagtctca ggagaaaaag gccgagctga aacgccagtt
    29221 gttaccggcc tatgcgccgt gggtggcggg cgtgatcgcc gccgatggtc agcggcagga
    29281 cgatgtgctg atgcatgtga tggtctggcg cattgacgcg ggcgactacg acggggcgct
    29341 gacgattgcc cgtcatgtgc tgcggcacga ctgggtaatg cccaaacgtt acacccgaac
    29401 caccgcctgt actgtggcgg aagagttcgc cgacgcagcg atacgagcct ttctggcccg
    29461 tcagtcgttc gatgccgggt tgttgcaggc ggcgctggac ctgacggccg acgcagatat
    29521 gccggaccag tcccgcgcgc ggctgtacaa gtcgctgggg tacgcgcaac ggctggctga
    29581 ctgcccggcg ccggcgctgg ataacctgcg gcgggcgctg gaactggatc aacggtgtgg
    29641 cgtgaaaaaa gatatcgagc agttggagcg acaactgcgc aacgccgaaa acggcggata
    29701 accgaacgtg cccacgcacc gggcggcacg gggtagcgac aggcatttgc cgcatcaaca
    29761 ccccgtccac cgcccaccca ttcagaggat gccatgagct ttattgcccc tgagtccgcg
    29821 cccgcgcagc aggacctgat taaaaacacc gccttctggc ccgatctgga tatagctcac
    29881 ttccgtgacg cgatgcgcac cgacggcacg gtgacaccgc ctcggctgcg gcaggcggta
    29941 ctgaccgcca tatctgaggt gaatgcggag ctgttcgact ggcggcaacg ccaactggct
    30001 gacgggtata cctcacttgc cgacgtaccc ggtgagcaac tggacggcga gccagaacgc
    30061 ctgcacctct accgccgcgc ggtgtggtgt tgggcgcggg ccaatctggc ggagcgttac
    30121 cgcgactatg acgccaccgc tgccggcaac aaacgcgccg acgcactgga gccggccatt
    30181 gatgatctgt ggcgggatgt ccgctgggca ttgagccgtc tgcaatcgca accgcatgtg
    30241 attgtggagt tgatttaatg caggtgcggg cgcagcaaca cgacaccgta gacgcactgt
    30301 gctggcgtca ctacggccgc acagcggggc tgaccgagca ggtattggcg ataaatcccg
    30361 gtctggcgga tatcggcccg atcctgcctc acggtctgct tgtggaactg ccggacgtgg
    30421 cgctggccgc cacgcaagaa actcttcaac tctgggactg acgtatgaat gaaaccgata
    30481 aaagtattgt gaccctgttc atcatcggga tgctgattgc cgtcggcaag gtgctggccg
    30541 gcggcgagcc ggtcaccctg cggctgtttc tcggccgtgt tctgctgggc ggctttgtct
    30601 caacggtggc cggggtggcg ctggtgcagt tccccgacct gtcgccactg gctatcaacg
    30661 gtatcggcgc ggcgctggga attgcgggtt atcaaaccat cgagctgctg atccagcggc
    30721 gcgccaagca gctgagcgat aaggcgggcg gtaatgaata atccaaacct gcaggcattt
    30781 ttggacatgc tggcgttttc cgaaggcacg gccaaccatc cgctgacccg taatcggggc
    30841 tatgacgtga ttgtgaccgg cgccgacggc gcgccggaga tttttaccga ctaccgcgat
    30901 catccgttcg ccaatggccg accggcgaaa gtcttcaaca aacagggcca gcgctccacc
    30961 gccgctgggc gctatcagca gttgtaccgt tactggccga cgtataagaa acagttgcgc
    31021 ctgccggatt tcagtccggc atcacaggat acgctggcaa tccagcttat ccgcgagcgc
    31081 cgggcgctgg atgacgtact ggccgggcgt attgcctgcg cgatcgtcgc ctgcaataac
    31141 atctgggcct cgctgccagg tgcgggctac ggccagcgag agcatgacgc cgttcggctg
    31201 ctgagcgtgt atcaacaggc cggcgggagg ctggcgtgag cctctggctg aaagtcgccg
    31261 ccctgatggt gttactggtg gctgccgtgg cggtgcaatc ctggcgattg agtcacgcgc
    31321 agcaactggc cgaccagcag gcgcagacgc tgaccgctca acacgcggcg ctgactgaac
    31381 aggccagcca gttgaaaagc ctggctgacc tggccgagcg caacaacgcc gagcaggcgc
    31441 ggctgcgcag tctggccgcc gatactcagg aggcactaac cgaacgtcag aaaacccttg
    31501 cgaggttgca acgtgaaaat gaggcgctta aacgctgggc tgacactgct ttgcctgatg
    31561 atattatccg gctgcggcag cgtcccgccc tcaccggtgg ccgtacttac cgtgaatggc
    31621 tgtcccaggc taacgccctg ccggtttccg gcggccagcc cgcaaactaa cggcgagctg
    31681 aataaccaat tggatctgac tgaggctgcg ctggccgact gcgccgatca ggtggatatc
    31741 actattgctt gtcaggaaca ccatgaacaa accgcgatta ctacgaaacg cgctgagtag
    31801 cgccgtgcca cacctgcgtg ataatcccga ccggctgcat gtatttgtgg aatcgggaac
    31861 ggtggtagga acactggccc cgtctctctc ttgggaatat cgctacaccc tgactctgat
    31921 tgtcaccgac tatgccggga atgaagattt gctggtggcg ccggtgatgg cctggctgcg
    31981 cgagcatcag ccggacctgc tggcgaaccc ggagaaacgg gaaaaaggcg ttgaatttga
    32041 aaccgaaatc ctgaacaacg gcagcgtgga tatctccatc agcctgaagc tgaccgaacg
    32101 tgtccaggtg cgcgccggct ctggcaatca ggtggttgag ccgttgctgg agccaggcga
    32161 accagacgac tactggatag atcgccgtgg ataacctgca gcgcattgat gactggctcg
    32221 ccgccctgct ggcgaaactc acgcctgccg agcgtaaggc attgttgcgt ggcgtagccc
    32281 gcgatctacg caaacggcag caagagcgta tccgcctgca gcagaacccg gacggtacag
    32341 catttgagcc gcgtcgggtg tcgctgaaag ataagaaagg tcgcatccgt cggcagatgt
    32401 tcagcaagct acgtgccgcc aaatacctga aagccagcgc gaccgcgacc gaggcggatg
    32461 tggggttcat cggcagcgca caacgactgg cgcgggtgca tcactatggc ttgcgcgacc
    32521 gggtacgcga gcacggcccg gtagtgaaat acgctgcgcg tcaactgctg gggatggata
    32581 ctgagttaat aaatcacatc cttaataaat tacatgtatc aattaagtaa aatttacggc
    32641 tatttcccta ttagtttgtc gtagttaggc atacctgata taaactccat agtatgggcg
    32701 tgtgtttggg tatctcctat tctaaatgac tcagtcatta tttttatcat tatgttatac
    32761 tcggcatatt ctgatatatt tatggatggt ttttcatacc tattggccct gtatttctcc
    32821 atgaattcat aagcatccct tggttgaaag atgaatttct ctctcagtaa ggctataaaa
    32881 accagagaat taatatttag ctctgagaat aattttctgc tattttctat gtttattttg
    32941 ctttttatat cctcatggag gtggaaaaac tttttaatga gaaggaaagt taaaaccatt
    33001 atggctttgt catccttatt gttttctcct tttatctttt tctctatttc aaccatcaaa
    33061 ccatgcatgt ctattatttt attaccacat ggatttaatc tgtttttttc tatcatatct
    33121 attataatat ttagatatat tttggtatct gaaaactgct atgaaaatta agagaagata
    33181 gcatgattga gatcactttt tgacttcgcg tataacaggg aatcaggctc aatgtccgtt
    33241 ggtggatgat aaacacggaa ccgctaatag tttgttagct tcgtatttat attttgaaat
    33301 gttttgttac gtgagcgcta ttagccgtag gagatgacca atggataggg agtttgaaca
    33361 gtcactgatt gttgagcgta ttgcctttct ggccaaaaat gccgggatgg aggggaatga
    33421 tgagcgggac aggcaaattg cgctgatctg gattgctgaa ctggcggggc aattgatgac
    33481 gttacaagcc gcgtaatgcg gcttaggcgg cagcggttct cagcaggtct aatgccattt
    33541 gtcgctgttc gggtttcagg ttattcaaca ccgtttgcag taactgatcg ccggttttgg
    33601 cgctggggct gagtgtgtgg gaaaaggtca ggttcatcac aaaggtgtag ccgcattcca
    33661 catctgcaca ggcgcagtaa atatctgcaa tctgtcggtg tttgcggttt gtcttgcgga
    33721 taacggcttt tgcgccgcac tccgggcatt caatctttaa tacccgcata ttccatgctc
    33781 cggcctctaa aatatggcta aattttaacg ttttatgccc cattacgcac cctgaatcgt
    33841 tgtatcatcg ccaacatcaa agattaaatg cagattttgc ggtatttcgg ggtctttatt
    33901 gatggaggcc ataaaacggc gctgaattgg gatcacctcg tctttgcggt acgtgttccg
    33961 cgccttttcc gggtcgccca gcccggcagc gttttgcggg atgatgccgc acagcccagc
    34021 cgggaaacgg tgtgcattca gtacatcctg ggcgctgatg tttttcacgt tggcgaattc
    34081 gtccttggcg ctgatatccc ccatctggat aaattgcacc ccttccttat cgccgtttgg
    34141 aatattcacc agaatagtgg agaagttgcc gatccctttg ctgctggcta actggcgctc
    34201 gatttcttct tcgatctcgt cggtcatgtt cgggtcgctg gtgtagagga taccgccggt
    34261 gtgtgccccg ttatggtagt aacgacgccg aaaaatcacc gcttcactgt tcagcaaggc
    34321 cgagtgaata ccgccgatgt aatccggcag gccgtaaatc tgctgttgcg ggtcgtacat
    34381 cttgatgaaa atcacgtctt ccggcgggta aaccagcggt tcgcctttct gcaataccac
    34441 aaattccccg gttttgcgga tgcgggtata cagcgcgggt agcggcgtca gggcgatcac
    34501 ctctccccag ccattgcgca ctttcaaaat ggcgatatca ccaaaggtca ggtagtcgaa
    34561 cgcggcggcc agtatgtcat cgtgagacag accaccgccc tgatagtcag aggccaccat
    34621 gttacggcgg gcgtagagaa tgccgccgtg ctggccgttc aggttgacca gttgagccag
    34681 ggcgagccgg tctatcggca gggtgtagtg attaaactca ttgtcatacc acacatcacg
    34741 gtaatcggtg ccggtagtca gtaccggttc cggcttgccg aaagtgataa tactcatctt
    34801 tttacgcggg gcgttttgcg ccttctggcg gcggtgtgat gtccttttca tgctgctttt
    34861 ttcagtctcc atcgggattg gggtttgttc tcatagttca gcggctcgtt atccagcgcg
    34921 tgcgcgatag cgaagaaggc ttctgcatgg ccggtttccg cgctgcggtc ggcgatgaac
    34981 gtcatggcgt tgccgctggc cgtggtggtg cgtcgtatcg ccatgaatga tgccgggata
    35041 gccttttcat cctgatccca ctcaatgcgc tgactttcca ccacgtcagc cgctttcatt
    35101 accagccggt ttttggtttc cacgccgtag cggatagccg ttgcctgccg catggcaaag
    35161 tgctggatgt tctcaaacac cccagcgccg atgccggtca catcaatgcc gatataggta
    35221 aagtggtaac gctggaatag ctttttgatc tggttggcct gataacggaa gttcatgccg
    35281 tgccagttga cgaccagcaa aacgcggaat ttctcgccgt cgtagatggg cggggcgaca
    35341 atcacaaacg tggacaggtc gccggagcgg gccgggtcgt agccgcccca aacttcacgg
    35401 ttgccgaatg ggcgtggcgc ggtcgggtcg tgatcctgcc aggtggccgg gtctacgccg
    35461 cagcgctcca ggtcgtcaaa gctgaacacc gcgtctttgt tgtccacaaa cacgcacata
    35521 tacagcatgt tgaacgtgtc cacgttgtag cggttgcgca gtttttccag gctggccaga
    35581 ttgaaaccgc cccggatcgc gtcttccatt gtgataacgt accgccactg accatccggg
    35641 cagagccgcc cgccgtcgcg cagttcgtca aagccgggga agttaacccc ggcgcgtttc
    35701 ttgttgccgc gtttccattc ttcgcctgtc cagaacgggt acgcctggtg agttttggcg
    35761 ctgggggtgg aaaagtaagt ggtgcgccat ttgtcatggg tggccattgc gctggccact
    35821 tcgttaaggc gggcaaagtt cggcacccaa aagtattcat cgcagtacag atgcccgctg
    35881 taggattgcg cagtgttctt gttggtggat aaaaagcgca gttcggcccc gttacttaga
    35941 cggatcgggt tgccggtcag ggtgatatca aaatactgct gcgcaatgtt gacgatgtac
    36001 gagcggaaaa cctctgcctg ggcgcgactg gccgacagga agatttgcgg ctcaccggtc
    36061 agcaccgcat tttcaaaggc ttcaaaggca aaataccagg tggccccaat ctggcggctt
    36121 ttcaggatgt tgcgcacctg ctggccaata ttaaggcgca ggtgtttttg atagccaaac
    36181 aggtgttcat cagcccaggc gtcaaagtct tctttggtca ggctggaaat gtcgtttttg
    36241 cggtactggc gctttttggc cgggcgttca tcgtcgtcat tgctgcgtga gccgggcgtg
    36301 ttgccgtgac cggcggcggc gagtttttct ttatgcttgt tgctctgcgc ccgcagtttg
    36361 acggcgtggg cgatcagcat gtccatttcc tgcaattcca gctcggtctt tttatcccga
    36421 ccggccagca actgataacg gcgctctatc gcctcttcag tactttcggc gctgagtaaa
    36481 tccgcccagc cgaatttttg tgcccaatag taaataatcc gcgcattggg cagatttaaa
    36541 tcagcggcga tttctttcgg tgtggctctt tttaaataga gcagccgtgc aacaccgatt
    36601 aattcatcag aatatttagc catgccggta ttatgcggcg cgatttttat tttatgaccg
    36661 gtgtttattt cgctgtgttc gtcaaagcgt cgttatccga atggagacga ataaagccgg
    36721 tcgctgcccg tttcttattc cgtaataatg ccgttatccg acagaagcgg agtatgtaaa
    36781 tgtctcagtt aatgactaac tggatctgta tcgccacgga gggggaaacg gttgataagc
    36841 gggtaatgga aagacagtgg ttaattgatg ctgctgaaac ctatgacccg caactctata
    36901 ccgccctgat ttggccggag catgaaacat ggttcggcaa tgcgggggag gtactggcat
    36961 taaaagccga aaatggtgat gacgggttgc tgcggttatt cgcccagtta cgcccgaacc
    37021 accagttatt gcaggctaac cgggaggggc agttactgtt ttgctcggtg gagctaacgc
    37081 cagacgggaa ttttcgtggc acgggaaaaa cctatcttga agggctgggc gtgaccaata
    37141 ccccggccag cgtgggaacc acgcggctac gtttcagtag caaaaagcgc ggccgtttat
    37201 tcggtgcatt aaagccgctg gttattgatg aagtaaaaga aatcaaaggg aatagcatgg
    37261 caagtaaatc atggcatagc ctgttcggta ttaagccgaa ggcattcgct gagggtgaag
    37321 gcgaaagcaa cgatgcaggc ggtgacgata aattgcaggc actggcggaa gcgctggccg
    37381 aactggaatc ccgcgtaact gcgctggaaa gtcagcaaag ccagaccacc gatgcagtgg
    37441 aagccgttca ggacgatatg gacacggtaa aagaggtggt ggataccgaa gatttcgcca
    37501 cgctgcgtaa taacctgccg aagattttaa ataatttcgg caagttggat cgctctatca
    37561 ctaaattgcc gcagcgtcag gtcggcaata aacccaaagg gtttaatttc ctgtaagtcc
    37621 atttttttgg tgatacctct ttttttatct cgacatcgag aggacgcatt atgtttttaa
    37681 atcagcgggc gcgtgaatat ctgagcgcct acagtgtcgg tctggcgcag gaatatgggg
    37741 tagcggatac cgcccgttat ttcgcgctta ccgacccgaa agaaacccag cttcgtgctg
    37801 ccctgctgga gcgtgtggat ttcctgtcca tgattaacgt tctggatgtg gatcagctct
    37861 ccgggcaagt ggtgtccgtg ggcagttccg cgctgcatac cggccgtaag gaagggggcc
    37921 gctttatccg tcaggtcggc gtggaaggca acgactataa gctggtcgag acggattcct
    37981 gcgcggcact gccctgggat ctgctgtcgg tgtgggctaa cgccggcggc gaagatgagt
    38041 ttttccagtt ggtacaggcg ttttcgaatg aagcgtttgc gctggatatg ctgcggatcg
    38101 gctttaacgg taacagcgtt gccaaaagca ccgacccgga cgaaaacccg aacggcgaag
    38161 acgtcaacat tggctggcat cagcgcatga aggatttcaa agacgggcag caaattatca
    38221 ctgaccgggt ggtactggac gaaaacggcg attacaaatc actggatgcg atggcctccg
    38281 atttgattaa cgccaaaatt ccccagcaat accgcaatga cccgcgtctg gtggtgatgg
    38341 tcggggcgga tttggtcgcc gccgaacagt atcgcctgtt ccagaaggcc gaccgcccga
    38401 ccgagaagat cgccgcccag atgctggaca gtaccattgc cgggcgtccg gcgattgtgc
    38461 cgccgtttat gccgggcaag cgtatgaccg tcaccacgct gtcgaacctg catatctaca
    38521 cccagcgtaa tacccggcag cgtaaagctg aattcgtgga agaccgcaaa cagtttgaaa
    38581 acaaatattt gcgtaacgaa gggtacgccg tggaataccc ggaactgtat gcctcttttg
    38641 atgaaagcgc cgtcaccatc ggtaccgtgg ccgagcctgc agaaaaggaa ccagcgtaac
    38701 gcatggccct gtcacccgcg caacgtcata acgcccggat ggtcgccgag cagcagttat
    38761 cccggtgcca ggcggtatcc ggcgatcaca gcctgcatgt gcaactccgt gcgctggaaa
    38821 acgacgtggc acggctgcgc agtcagccca cgttacgcga cagggtagag atgaaacgcc
    38881 gggagttgct gccgcgctgg ttgccaacgg tacagcgcta tctggacagc ggcgaggtgt
    38941 atcaaaaccc ggtgttcgcg cattgcgtgg tgtggctgtt tgatgtggaa gagtttgatc
    39001 aggggctggc gtgggcggat atcgctatcg cgcagggaca gcacacccct gacaacatcc
    39061 ggcgcacgtt cgcggcgttt gttgccgata cggtactggc ctgggcacag cagacagcgg
    39121 acatagggca gagtgtggag ccgtattttt cccgcacgtt taagaatgtg gcagaaaact
    39181 ggcggctaca tgaggagatc accgccaaat ggttcaagtt cgccgggctg ttactgctgc
    39241 gtgatgagca ggggcaacca cgagcgaccg cagcggcgga tatcgacacg ctgacggcgg
    39301 cggatgccct gttgcatcag gccgagcagt tttaccgcca ggttggtgtg ggcacgatgc
    39361 gccgcaatat tgccgcccgc attcgtgcgc tgcaaaagga ataaaagact accgcaagcc
    39421 aggcgggcgc ggctgaggca atgcaccggg tgtgcgatgt gccgtggaag ccggtcagcc
    39481 cgccttttta cgggggatgc atgttcagtg gaacaccggt tgattatcag gatgagctac
    39541 tggccaacaa tggattttgg ccagacctga acgtcaggga ttttcagtca cagcgcacca
    39601 ttcccgccga tctggctgcc gataccgtcg cacaggcgtt actggccgca gtgggcgagg
    39661 tcaacgccga tctggctgag gtggaggcca gccgccgggc gaaggggttt atgcgggcgc
    39721 aggatgtgcc aggcgtcagc ctgaaaggcc agaacgtgct gtgtgcgcag tatcaaaaag
    39781 cggtgtttgc cagggcaaaa gccgatttgc tgggcgagtt tgccaccatt ggccgccgcg
    39841 agtctcatcc gggacaggag ggagacgaca cacgcaaggg attgctgggg gaagcggcga
    39901 tggtgatccg ccgcatgaaa gggctgaaac gggcaacggt gcggatggta tgagcaagct
    39961 ggatgacctg accacctttg tttcgacaca tctgccgccc cgcgtgatgc aggggtttga
    40021 cagcttcatg gatgaagtga gctttatccc cgcccgccgt gacctgggcg aagaccagta
    40081 tcaactggcg gtgatgaagt ttgatgctgt gttgagctgg gagcgctggc cataccgggt
    40141 gtgtgacccg cgcaacctgt gcgctctgtt actggtctgg caggaggggc aggacgatgt
    40201 gccgtacatg gatgccgggc tggatatgga gttgcccaca ctggatgtgg acgtgcgcga
    40261 tcaggacagc gcgattgtcg tggtgtcgct gcaactggcg gaatcactgg cgattgtggc
    40321 cgatgacaac gggatcatcc cgtttgatgg tcggcgctgg cgtctgacca gcccggaagt
    40381 ctggcaggcc acatccgggc atctgttcgg tgccggcgac gacggggcgg aggtcggggc
    40441 gtcatgatcg tgcatggcga actgagccag tcacagctgg ccgaactacg caccgcattg
    40501 caacggctga cgctgccgcc caaaaaacgc cagcgtttac tgtggcggct ggcgaaatac
    40561 ggggtgattg cggcggcaaa acggaacgtc cgggcgcaac aggcaccgga cggcagcgcc
    40621 tgggcggcac gacgcggcca ccgacgcggc aggatgctgc gcaatctgcc caacctgttg
    40681 catatccgcg aaatgccaga gattcaggcg gtacggattt atctacaggg cggcgggtat
    40741 cgcaacggga aaacgccggt accggcgggc gtggtgggct acagccaaca aaacggcatg
    40801 agcgtatccg tcaagcgttc acaggttggc aatggacgcc ctgagccggg acggatggcc
    40861 acgcggcgac aggcccgcaa actgcgggcg ctggggtacc gggtaaaacg cggagcgcga
    40921 tggaaaaagc cgccgtaccg ggagattgag gaaagcctga gctttgcgca ggcgggatta
    40981 ctcatccgta agttgagcgg caaggcggcc aaaaccgcct ggacagtaga tgttcctgcc
    41041 cggccatttt tgggcatgaa cgatgcggag tttacaaaag cgctggcacg gcagctacag
    41101 ggcattggct ttggctggga tgtgaaagcg caggatatca aggggtaagc atgagttggc
    41161 caacggttca ggttaaccag gttaaccaac tacagggcga aaccagcgag attgagcggg
    41221 tagtgctctt tatcggggaa gggagtgttg agacggtgaa aaccgtgccg gtcaataccc
    41281 aaagcgatct ggatcaggtg ctgggggcgg cggattcggt actgaaacgc gacgtcagcg
    41341 ccgcgatggt caatgcggga cagaactgga gcgcttttgt ctgtctgctg ccgccaaaag
    41401 gcgactgggt gagcgcggtt actgccgccc aacaggtcgc cagtgttgaa ggggtcgtgg
    41461 tgtccctgcc tgccaccaaa ggcattatcg cccaggcatc gagcttgcga tccacactgg
    41521 tgtcagcatt cgggcgctgg gtgtggtttc ttctggcggt tgacagcccg aaagaggggg
    41581 agggctggga taagtattta cagagcctga gtaatttaca gaacggtgca gcggcaccgg
    41641 cggtgcaact ggtgccgagg ctgtggggca atgagccggg cgtgctggct ggccgcttgt
    41701 gtaaccgtgc ggtgacgatt gccgacagcc cggcgcgggt gcaaaccggt gccttactgg
    41761 cgatggggcg cacggattta ccgatggacg gtgccggcgt gacattggat ctggcgatgt
    41821 tgcaggcact ggaaaaacag cggtacagcg tgccgatgtg gtatcccgac tatgacggct
    41881 actattggtc agatgggcgc accctggacg tggaaggggg cgactatcag gccattgaaa
    41941 acctgcgcgt cgtggacaag gtggcgcggc gcatccggtt gcaggcgatt gccaaaatcg
    42001 ccgatcgcag cctgaacagt acgccgggca gtatcgcggc gcatcagggg tactttgcca
    42061 aaacgttgcg tgacatgtcc cgcagcaccc aaatcaatgg catcaccttt ccgggggaag
    42121 tgaagccgcc gaaggatggg gatgtggtca tcgcgtggcg ctctaaaacg gcggtggaaa
    42181 tttatctgat tgtccgtacc tacgaatgcc cgaaagggat cacggtcagt ctggtgttgg
    42241 atatgtcgct ggagggtagc gcatgacaaa acggatttcg ggccagtcgt ttgatttcaa
    42301 tatggacggc gcactggttc acgcggaaaa agtctcgctg agtatcacgg ataacaccgc
    42361 cgccgcgcag acgcagggca tccccgatgg ctgggtggcc ggtgacgtcg ccgccgaagg
    42421 tgaaatggag ctaagtacca agagtctggc ggtggtgacg gcgaaagcca gcagcgccgg
    42481 gtcatggcgg ggtatcgatc cggtggactt gatgtggtac gccaaggcgg gcagcgagga
    42541 aatgaaggtg gaagccttcg ggtgcaagct gatcctgagt gacattctgg atgttgaccc
    42601 gaagggcggc agcgtgatgt cacacaagat taagtttgtg gtcaccagcc cggattttgt
    42661 gcgcatcaac ggtatcccct atctggaatc ggaactgacg gaaaagctga tcggctaagg
    42721 acagtcatgc aggaatacga aaagaacgcg ctgggattac tggtgctggg ggcgctgatt
    42781 gcgctgggta agttgctggc cagtgatgaa aaaatcacgc cgcgcctgtt tttcggccgg
    42841 atgattttgg gatcggccac ctcaatggcg gccggagcgg cgctggtgtg ggtgccgggg
    42901 ttgccgccga tggcggtcac cgggctgggt gcggcgctgg gagtggccgg gcatcaggcg
    42961 gttgaaatct ggctgcgccg ccgtggcagt ggtttgctga aagggagtga cgcaaaagat
    43021 gacgttaagt gaaaaacagc agttatttac ccaactggtc gcacagttga tccagtgggc
    43081 gggagagcgg gggtatcgcc tgacgttcgg cgaggcatac cgcacactgg aacaggcgaa
    43141 gctgaatgcc cacagcgggt ccggcatcgc caacagtttg catacgcaac gcctggccgt
    43201 ggatctgaat ctgtttatcg atggtgaata ccagacccga acggaagcct atttgccgct
    43261 cggtgaatac tgggaatcgc tgggtgggtg ttggggcggg cgctttacct cacgcccaga
    43321 tggtaaccat tttagcctgg aacacaacgg ggtacgctga tggatgggct atggcgggtt
    43381 gtggcgggat tgacggtggc ctttgccgct ggctggcaaa cggcgagctg gcagcgcgac
    43441 agtatcgatc tggcagtgac tcgcgccgct accgccgccg ctgagcaatc acgccaggcg
    43501 ttacaggcat tggcgagcca gtccggcgag gcgctggaat cgaaactgga ggcattacgc
    43561 aatgtgccga ataaaaccgt ttaccgggaa atcgttaaac cggtttttac taacgtgtgc
    43621 ctgtctgctg agtttgtcag cctgtacaac gacgccgtta atcacaccga acgtgtctta
    43681 tcaggaaaac ctgaaaaaga aatgtccggt caataatctg ccgcgcttat caggtaccac
    43741 cggcaatgat gcagcgcagc cgttaatcag ttggccgcaa atttatgcgg attgtgccgc
    43801 ccggcataat cagttaattg atgaaataac ccaacgggaa aacatgcaat gagcaaaatt
    43861 accttatctg tttctggcaa ggaattgtcg tttgaaccga ataccgttgc ctataacggc
    43921 atgattaatg atatggcaat ggataataaa gtggctccgg cggtgacgta tcttcgccgt
    43981 attgtcgtag ccaaagataa agaaacgctg gatgaattat taaaactgcc gggtgccgcg
    44041 ctgcaaatta ccgaagcggt taatgcgcaa tatgcaccga agttggaaat cgaagtaaaa
    44101 aactaaccca gcggctgcgg gccatcgaaa ataattttct tgaacaggca ttaaccctgc
    44161 gacggcatta tttaccggct gaaaatgatg atgccgataa tctggcccgc gccgtctggc
    44221 tggcaaatac acactgggaa aatatgcgta tttccgtggc gaacgggatt gcgctggcat
    44281 taaaaggcga ttcatgaagc aactcgattt tacattaagt ctgattgata agctgacccg
    44341 cccggtaaaa caggcgcagg cggcggtcac cggctttgcg aaatcgtcgc gggacgcctt
    44401 ttctaaaatc gcggttggcg gtgccggtct tattggtacc gctatgtcta tccagggggc
    44461 gcttggcccg gcggttgaga tgcacggcgc aatggtcgaa gcgtcagcgc gtggcgtcga
    44521 tgattcggcg ttacagaaga ttaatgccaa cgcgctgaaa ttcagcaccc agtacgggcg
    44581 ttcggcgctg gagtatgtgc aatcgaccgc ccggattaat gcggcggtcg gcaccctgac
    44641 caaagaggat ttgccggggg tggtcagggc atccaatgtg atggcggcag cgctgaaagc
    44701 cacagcggac gaatcgtccg aattcatggg gcagatgttt gccaactttc gctctgatgc
    44761 cgaatcaatg ggtaatgtgc agtttgcgga gcaactggcc ggcaaggccg cctatatgcg
    44821 taatgccttc ggtgttgagc tgggggcgat taaagacctg atggaaggcg cgcgcggggt
    44881 cggtaccaac tatggcattg gtatggatga gcagttggcc gtgatgggtg agctacaacg
    44941 cacattaggt acggaagcct ccagcgcgta tgaaggcttt ttgtccgggg cggtcaaggg
    45001 tgcccaaaaa ctggggctgt cgtttgaaga ttccaacggc aagttactga ccatgccggc
    45061 gatgctggag aaattgcgcg ggaaatacgg ggcgagcatt gagggcaatc tgaaagccca
    45121 gtctgatctg gatgatgcct ttggtgacag tgcggcggtc attaagcagt tgtatggcaa
    45181 tgtcggcgtc ttgcagcggc atatcaccga actgggcagt aatgacggta tgacgcgggc
    45241 cacggaaatg gcgcagaaga tgaccagccc ctgggaacgg ctgaccgcta tctggtacgc
    45301 catccgcgcc gcgatggggg ccacgttgct gccggtgttg tacccgctga tcaacaagat
    45361 ggcggacggc gggcaggtac tggtcaggtg gctgaatttg ttcccgaata tcacgcgggt
    45421 gattggttat tgcgtactgg ctgtactcag tctggccggt gcgggggcta tcgccaatat
    45481 cgtgatgggt gtttctgtgt ttatgctcgg tggcctgaaa gggttatgga aagggctaac
    45541 cgccatcatg aaaattcatg tcggtgttat ctggctgtat aacaaggccg tgctggcatg
    45601 ggcggcgacg atgcgtattt tgcgcggtgt actgctggcc gttcgtatgg ccagcctgtt
    45661 aaccggcatg gcattcaata tcgcgctgtg gccggtgttg ctgattatcg gtgccgtcgc
    45721 cttgctggtc gccgggtgct ctctgctgat ccggcattgg gatggcataa aaaacgccat
    45781 cactcagacc gacatgtgga aaaccgttgc ggaaaaagtg caatgggttg cggagatatt
    45841 tagccagacg tggaaagcca ttattgatgg ctggaaccgt gttgttaatg cgatggggag
    45901 tttctccctg accgagacga tgggaaaaat ggctgatggc gtcggggaga tattttccgg
    45961 gttgtgggac ggtattttag cgtcgttcaa ttcgtcttac cgctggatta ttggaaagct
    46021 aaacgcaatt ccggggatca atatcgccat gcctgagtct gttccccggc cgggcggtga
    46081 gggtttatta acgggtggga aaataaaggg gattgattcg ggcgggttgc aacgggatat
    46141 cagtaacagc aatgcgaaga attacaccga caacagccga aaagtcgaaa acctgacgat
    46201 ttacgccaat aaaggattta cccctgagca attaacggaa tgggaagcac tgcggtaatg
    46261 gatgacgtga aatatattga cctgctaatt acagaacgtg atttcagcct gaattcgggg
    46321 cgtgagccga tattttgcaa taaccggatc agtattggtc aggattgcgt gcatgccatt
    46381 attgaaagcg ggctgaccac caaactggtg gccgagcgca gcccgacgct gcgagccgat
    46441 gtgctgacgc aaatgattat tctggtggaa gacgatgaac ggattatccc cggcacggtg
    46501 gtgatcagcg aagaaagccc gacccggctg tgggtgacgg cggaaaccta tgatttcggg
    46561 ccgatcacgg ccagggtgga cgtatgacgg aaaagccaaa aattgattat gagcaggtgc
    46621 tgaaagaggc cggaatgccg gtgacggccg agacggtaac ggaacagttt caggcacaag
    46681 tgacggcatc cggtctggtc actaacacgt cgcggatgtc gccattctgg cggctgattt
    46741 cggttatggc gacaacgccg gttatctggc tgaaagatgt tctgatcagc gtggtactgg
    46801 ccaatatgta tctggctacg gcgtccggcc cattcctcaa tctgtttgcc tggggtgtca
    46861 atctgtcgcg caaggcggcc acggcggcag cgggcgttgt ccgtttctat aagtcggatg
    46921 cagcacaggc agtggtgatc ccggcgggta cgctgattca gactgaacgc attaacggca
    46981 cggttttcag tgtggcggta tcggtggata ccgtgattgc cgccggtctg gccagtgctg
    47041 acgtcccagt gaccgccacg gcagacggtg gggcattcaa tctggccccc ggttattacc
    47101 ggattttacc ggtaggggtt gccggtattg aacgggtgga gaatcaagaa gactggttgc
    47161 tgacgcccgg cgcggatgaa gaatccgatg atgatctgcg tgagcgctgc cgcaaccagt
    47221 tcaatctggt ggggaattac cacaccgacg cggtgtatcg cagcatgatt gcggcggtgg
    47281 ccggattgag cattgatcgg attttctttc agcatgacgc cccgcgtggg ccgggcaccg
    47341 ccaatgctta tttgttgctg gattcggggg tagtgtcaca gccctttatc gatgcggtga
    47401 atgattacat cacggcacag gggcaccacg gccacggtga tgatttgcgc tgtatggcat
    47461 tgccggaaac acagcatgag ttaaccgtga cggtttatgt gcgcaatctg gtgaacgtga
    47521 cggatgaggc gttagccgcg ttgcgtagcg gatgccagga tttagtccgc tgtgcctttc
    47581 gggaaaacac cgggtatgac gtggcaaaga cgtggccctg gtcgcgtttc tccttttcca
    47641 cgctggcaca ggaattacat gatgcgtttc cgctgattgc gtcactggat ttttccctgg
    47701 gcgatattgt cagcgggctt aatgtgccgc gtctcgcctc gctgacagtg gtaatagccg
    47761 atgcctgatt ttaaagaaca actgtcgggc ctgcgactgc cgtcatggat ggataagggc
    47821 gagcccgccg cgctgctgaa tgccagcaaa gcctattggt tgcaggtcaa tgactggctg
    47881 cgctggccgt tgcagcaact ggacgtcgat acctgcgcgg agccgttgct gaacgtactg
    47941 gcgtatcagc gcgatatttc gcggctgaaa ggggaagcgc taacgctttt ccgtcgccgg
    48001 gtgaagtacg cctttgtgaa tgcgcaggac tcggggagcg tcgcggggtt tatcgccatt
    48061 tttgagcggc tgggcattgg tgctgtcacc ctggccgagc gtcaaccggg gtatgactgg
    48121 gatgtgatcc ttgtacgtat caacgatgag cagttaagcg gttataacgc cctgatgatg
    48181 agtctggtca ggcagtacgg ccgcacctgc cgccgctatg tgtttgacct ctggaatggg
    48241 gaaacccagt cagtccggtg cggggagttt gagcacaacg cagaatacta ccacgcagtc
    48301 agcttgatgc cggccggaac ggtaacggcg cgtgttgcgt tgcaccctgt gcgcacatcc
    48361 gcttcgacag aatattattc agccaacgtg taagagggat tatggcgcag agtgtgatta
    48421 cccatgcgtt tgaaacgtgg aatgttcagc gggttttaga cggcacggca gcccggcccg
    48481 atcaggtcgt ttttgcgcgg gttccgggtc aggatgaatc ggtgccggta gaccgaaatg
    48541 aagggctacc gcctgccgat cagattcagc ataccgccgc cattacccag gccggtgtcc
    48601 tgaatgaaaa cgcggtggtt tattcggtgg tgctggatac caccgtgggg gattgggatt
    48661 acaactggat tggcctgctg gacagcaaaa cgaataccgt tttgatgatt gtgcatgtac
    48721 gcacccagca gaaactggcg acccgaaacg gccagcaggg caacagcctg acccgtaatc
    48781 tcatgatgca atttgatggc gcggccgctg ccacgcaaat caacgtgaca gccgatacct
    48841 ggcagattga tttttcggcc cgtctggcag ggattgatga gcgtatccgc attgaaaata
    48901 tggataggta tggttcatcc gcgttttttg gtaatgcgta tcaggttgtc aaagatggca
    48961 atgcgtatgt tgtaaaagcc ggagtggcgt atgccgctgg gctgcgtgct tggctgtcga
    49021 gtgatctaaa aattacggtg gatgccttgc cgactcgtgt ctttctggat gtgtgctggc
    49081 gtggtgaatt cacacaggca tgggcggttg atagccagat cgttgttgcc aactcggcag
    49141 atcatgaaat acgtgatggt gttcagcact atttgcttcc tgtcgcggat attgatgaaa
    49201 acggcaatat taccgactgg cgtaaacaag gaagcctggc agaacaaaat gcgcagaccc
    49261 tctatcttcg taaggacgat aatctggccg cattacgtga taaagaagcc agccgaaaaa
    49321 atttagggtt gggtcagctt gcggtaatgg ataccgacac agccagacaa acgcttcgta
    49381 tcacccaatt agaaaatgaa ctggtaggta tccccttgcc ttatcccggc gcaacagccc
    49441 ctgacgggtg gctgaaatgt aatgggcagt ccttcaataa atcgatgtat cccctattag
    49501 ctgggcgtta cctgtcgggt tttttacctg atctgcgcgg tgaatttatc cggggttggg
    49561 atgatggacg aggagttgat gccgggcgca gtttattgtc tgcacagacc caaaccgttc
    49621 aagaccataa acatgttggc acaatggtga acagcaatcc tctgcaaacc ggtatgaata
    49681 ccgggatcgg tttgttgtca caatatacgt caacgccaac agtcgggtat tcaaatgaaa
    49741 tcagcagcgg cggaacagca gaagggagta aagaaacccg gccccgcaac gttgcattca
    49801 actacatcgt gagggctgcc tgatggcgaa ttattcagtg aatgttaaag aaacgacgtt
    49861 agataaagac ggtcacgcta tgatggcggg gtggatcacc gtctttcatg ttgatgccaa
    49921 aacgcgggaa tatcgcgggg ccagctatga atatttgatg gccggggtag gcattccggc
    49981 tgacagctat agtgatgcac ccgagttacc gccagaagga aaggcgttat gccgtgctgc
    50041 cgatgggctt tcgtggatga gtgtaccgga ttatcgcggc agggtggcct atgatacgca
    50101 aacccgcctc agtactgaaa tcaccgtgcc tggccagttg ccggaaacgc taacgctgtt
    50161 agcgcccgtt tcggaatttg atatctggaa tggcaaaaaa tgggtgacgg atacggatgc
    50221 acagcatcag gcgtatgtga atagcgcaat gcaggaactg aacgagcggt ttactacggc
    50281 caatacccgc attcaggcgt taagcgatgc ggtggacatg gaactggcaa ccgaggaaga
    50341 aaaggcgttg ctgggtaaat ggaaagagta tcgcgtgctg ttaaaccggg tggatgtgaa
    50401 tacggccccg gatatcgtct ggccggagac tccggcggta tgacgtggcg acaggctgat
    50461 ctttgcctct cgtccgcttt gccgccgttg acctgttcgg tgttgccggt tcatccgtgg
    50521 atctatggcg tgggtaacgt gaccgataac ggccattatt taagtccggc caatgcggtg
    50581 gcttacctgg ctgaacggct aggcactgcg gcggataatc tgaccgtgtg cgtgtggatg
    50641 gtctgcggga gtgggctggg ggaattcctg caagcgctgg atgcactaac ggtagttttc
    50701 cccgctccgg cattgagcca ggttgcccga caggcgcggg ctatggcgga gctggctaca
    50761 gtgaaaatgc aaatcccggc caaaaactgc acgttccccg ccgccgcgcc gttgtcggtg
    50821 gccagctgcc gccaggcgtt gaatgcccag cgtatggcag cggcgcagca gcaggccgct
    50881 gtaccgatgg ggctgaatgc gctgaagggg atggctgagc gctttacatc ccagcgcgag
    50941 gccgctttat cggaaatcag taaaaccatg cagcagatgg cccagcgtag tgcgctggcg
    51001 tgggttttta ccgggcaggg tgcgatgggt gtgatagcgg cggagatgct gaaaaatatc
    51061 cctcaaccgt ctgcaattta taccgctgcc atgatgttta cagggaaaga gctggatgcg
    51121 ttggagagca tgatccgtga gccagataat tacactcgcc cttgatggcg aagctatccc
    51181 cttgcgtggc ttgaccgtca cgccctcaat gcaattcgaa gaaaaagacc agtccgggca
    51241 aacgtccagc acggctaacg ccgagcaggg tatcaagccc aaagagctgc gcgtgtcagg
    51301 tgtaattccg tttactgagg cgaaagtgtt aacccggctg tttgccctgg cggaagccaa
    51361 agaaggcgac cagttgaaac gctatcgcgt ggccaacctc accgcgcagg cgatcaactt
    51421 ccggctggcc accttcaccg ggtcgattga cgccccaaaa caggatggca aacaagcctg
    51481 gctggtgacg tttacgttgc gcgaacatat cagcgtatcg gaaaagcggg acgcccgcgc
    51541 aggcaatcaa acagaaacga agaagcaggc accggggcag gggagtgctg ccggtgaggg
    51601 tggtgaaaaa ttaagctggt ttgagcgcaa agtgctgaaa ccggtcaatg acgcgctggg
    51661 gtaagccatg cgaccgatta cgcgactgat gttatctggc gatgcggtac atgttgtgga
    51721 cgccaatgtg gtactggagt taaacgcctg tggccgggga tttatcacgg ttgagactga
    51781 gcaggattat accggcaaac tggtcaggct ggatgtgggc tataccgatc tggtgttgcg
    51841 ctggtttacc ggttacgtcg agcggagcca acccgccgaa aatggctatc aacgcttgtt
    51901 tgtgcgcgaa ctggcgggcg tatttgaccg gatgtggccg tgttcgtttc agcatccgac
    51961 gctccggcaa ctggcggact ggctgagtga gcacagcggg ttaacggtac aattgccgga
    52021 cgcggcgtat gtgagtaaac ctatcccgca ctttacccat agcggcagcg gccatcagtt
    52081 actggccaat atcggggccg cgttcgggat tgatgattac gtctggcaac cgttaccgga
    52141 tggtgcgtta tatctcggca gttgggcgga ttccctgctg gccggtgcgc cggtcagcat
    52201 tccggcggag ttcagccagg cgcaggccgc cggtaatagt atgacgttgc cactgataca
    52261 gtccgtcagg cccggcgcgg tggttaacca gcagcgcctt tcccgcgtgc agttgctcaa
    52321 cgaaagcatg acgatagagt gggtgccggt gagcactgtc accggcaagg cggcgcagcg
    52381 cagccctgcc cagcgtcaga tcgatactgc ttatcctgaa ctgtcggccg gattgcatct
    52441 gccgaagttt gcccgcgtgg aagcgccatc agaagcggtc agcagcggta atatcgccga
    52501 ccctttccgg ccccgttatg cggttgacct gcaattactg gatgcagacg gtaaaccggc
    52561 gaaagatacg ccggtgtatc cggcagtacc gctaccggta cctatggccg ggagtgaggc
    52621 cgggctattc cagtttccgc cgccgggtac gctggtcgag gtcgggttta ccggcggccg
    52681 gccggataaa ccgtttgtac gtcagaccgt ggccagtggt cagtcattgc ctgatatcaa
    52741 gccgggggag cagttacagc aacagcgggc ggaggtttcg cagcgtgtga cggtcgccgg
    52801 ggattgggag cggaagacgg atcaggccat cagggaatcg tcaatgcacc gggaggtgag
    52861 cgcagatgaa gaacggcgca cgctggttac cagagaaacc ctgattaaag cgacggatag
    52921 cgccacggtg ctgggtaccc acacgctcca ggccggtgcc atcgtgcaaa tcgcccaagg
    52981 ggattatagc ctggctacgc aggccggtta tacggccagt gtgggccagt cagcgacggt
    53041 agagatagga cagtcgctga ccgagaaaat agggcaactg cgccgcagca ttgccggtgc
    53101 gcgtcaggaa ctgatggcgc cagtggtgtg ggtcggtagc cagcaggtca acgtcatgac
    53161 gctgatgttg gacacgctgg acgtgattca ggaactggcg acgcagacgg ccagtcacac
    53221 gcaccctaac accggcaccc cgttaaatgc gggcgagata cagcagaccg gccgccgtac
    53281 cggcacactc aaagacaagt acagcccgat aatcgggtga tcgatcccca cctacccagc
    53341 ccgccgcgtg cgggcttttt tacgctcacc tgacgcgctt agcgggccgc tatgccacgc
    53401 cctttcccgg ccgcctcgcc gccatgccaa ccccttgcac cgctgcctgt accccgctga
    53461 cgcagccagc gcaccaacaa aatgaacgct cacatgacaa aatcggcact acaccgcacc
    53521 cgcctgcggt tttcggatcg caaagatttt tcagttttat ttttctacaa aacctaacgc
    53581 caacccgcgc cgccgccggg cttttgcgga agaacgccca ctgaaaacag tgaaaggaat
    53641 ttcagcattt ttcagttttt tggatctcgg cttaatcacc atgaaatttc aactatcaga
    53701 aatataatgg ttttttatgg atttggtcgt ttgggatgga tccctgaatg tccatgaggg
    53761 gttacctcgg ttggggcggt ttgcagcaat gatgcgggtt tggagtagtg aggctgtttg
    53821 caggaactga aacgatgtga accccgccag ggcggggcga ggtgcttaaa gtttgccttc
    53881 ggtaatccca aaatcgacga tgctcttact ttgaaggtca taggagcagt tgtatgtcat
    53941 cgtgattttt gcattgaaac cgttggtaaa tttcactttg tcaccgatga acgtcatttg
    54001 ttttttggct tcgttcaggc ggaaatgtga aaacatgggg gtcatcatgc cgtcagtcca
    54061 ctcgaaatca tacttggatg acttttctat cagaggacga cagcgtgatg ctgcttcaat
    54121 ccagttttta tcaaacaagc attgaccgtc atttgctgca caattctttg gggtatcggc
    54181 ttttgcggtg ggcttgtcat cacttccgcc aaagattttt atagcgcccc aaaccagtaa
    54241 caccaggacc acaaaaccgc cgattgcctg accggctgtg gtactaggat ttttaacgcc
    54301 gcagtgcggg cagacttttg cagaggttga tacttctttc ttacattctt tgcattttgt
    54361 taaagccata aaccaagtcc tatttgattc aaagaagcta aataatatga caagcaatag
    54421 gggaaactac agagaagacc gcgcgtatga tgaaagcctg tcgccatttt gtcgccacag
    54481 gtaataaaaa aggggttccg ttttcacgta accccttgat ttaattggtg gagctggggg
    54541 gagttgaacc cccgtccgaa attcctacac cgtcggtact acatgcttag tctggtcttt
    54601 acattcgctt gccagctgcg gacagacacg ccactaacaa actagcctga ttggatttaa
    54661 cgcttcaacc ccaggcaggg catccacgcg atctctttta ggtttgacct ctcttgatcc
    54721 ccgtcctaag agcggaggct agggagagag gacaccttca gtttcttagg ctgattaagc
    54781 tgctaaagca gcaggtgcga agttttcgtc gtttgcgact atttttttgc ggctttttac
    54841 gaggccaacc gcccctcggc atgcaccttg ggtttcgcga atcccgtcga atccagaatc
    54901 agccccaaga tattttttta ttataacaga aagatggcct gctaagctag tgaccgttag
    54961 cgggcggcat ttttcatgat gcgcgctttg tccagtttcc attcgcgctc tttgatatcg
    55021 tcgcgtttgt cgtgctcttt tttacctttg gctacgccaa ccttgacctt gcaccaggcg
    55081 tttttccagt acagcgccag cgctacaaca gtgtaacctt ctcggttgac tcggccgtac
    55141 agcgaatcca gctcacgctg gttgagcagc agcttacgag ttcgggtcgg gtcgcaaacc
    55201 acatggctgg aagcaccgtg cagcggtgtg aatgtggcgc cgaaaaggta agcttcgcca
    55261 tcacgcatca acacatagct gtcgctgata ttggctttgc ctgcgcgcag tgatttgact
    55321 tcccacccct gaagtgccaa tccggcttca atctcttctt ctatgaagta ttcatggcgg
    55381 gcgcgcttgt tgagcgcaat ggtggcagaa ccgggtttat gtgctttttt ctttgtcata
    55441 gtgccgtcat tatactggtt gtcgtcgtga atgaaatccc tcgccgggat tcataccgtt
    55501 ctttgtgaat gggtgcgatg cccctcgcag aatttttgtc tgaccgctca tcaatggtat
    55561 tattttgcgc gttttatgaa tcacggaaaa ttgtatgcct aaaatcagcc ggtctgcgct
    55621 ggtcccgttc agtgccgggc agatgtataa attagtgaat gatgtctcgt cttacccggc
    55681 ctttttgcct ggatgcacag gtagccgggt actgtcttcc tccgggagcg aaatgacggc
    55741 agcggttgat gtgtcgaaag ccggtatcag caagacgttt accacctgca atacgcttat
    55801 tgataatcaa tgtattttaa tgcgattggt tgacggtccg ttccgtcaat tgactggtga
    55861 ctggcgtttt acgccactga gcgatgacgc ttgtaaggta gagttgaatc tggattttga
    55921 attcaaaaat gcgttgattg aaatggcatt tggcaagatt ttcaaagaat tggccaacaa
    55981 catggtgcag gcgttcaccc tgcgcgccaa agaggtctat tgtgcctgag attcgtgtcg
    56041 aagtggtcta cgcgttgccg gaacgccagt atttgcgacc gctgacgctg gaagcgggga
    56101 gcacggcgga gcaggctatt caggcatccg gcttgctggc cctgcgcccg gatattgatc
    56161 ttggcgttaa taaaatcggc atttttagcc gcccggcgaa actgactgat gtactcagcg
    56221 atggcgatcg ggtggaaatt tatcgaccgt tgctggcaga ccctaaagag ttacgccgtc
    56281 agcgcgcgga gcgttcaaaa aacaaggcac gataacgtgt aatgccagtc agttaagcca
    56341 cttgatcctt aactgatcgg cattacacga taacgtgcct tgtttttttg tgggccagtc
    56401 agcgagtgtt agcctcgctg gacctgttca cttactgcgt ctgcaacgtg ggtttgttgt
    56461 ccacattagc cagcacgccc tggctgttga aggtcagggt cagcgtttgc tgtttcacgg
    56521 cttcgtgccc tggttgctga cggaagacgt agtaccaggt gtctgatcca aacgggtctt
    56581 gcatcatcgg ggtgcccaac gtgtagatga cctgttgttt ggtcattccg ttgtggattt
    56641 tggctacgtc ggcgggggcg agatagttcc cctgattgat gtcaggccga tagactacgc
    56701 gtcccagtgt ggaacaaccg gcagtcaaca taacaacaac caccgcggcg acgacagtca
    56761 gcgttttaca gcgcatagtg attacattcc ttaagggcat aggttgcaga tgataataga
    56821 ccttgcctga cttgaaaacc tgcaagacgt ttgtaagacc gcgggaattc gaaaaagttg
    56881 atcctcacta tgccgccagc aattctctgg cgttcgccag cgtgtttttg gtgacggccg
    56941 aaccgccgag caggcgagcc agttcctgca gacgttcgcg tttacccagc ggttgcatca
    57001 gggtttcggt cgctgcgccg tcggtgtgct tactgacaaa gtagtgatga tgaccgcatc
    57061 ccgctacctg cggcagatgg gtaacgcaca tcacctgagt agactgccca agctggcgca
    57121 gcatcttgcc gacaatcgct gcggttgggc cgctgatgcc gacatccact tcgtcgaaaa
    57181 tcagggctgg ggtatccatc ttgcgggcgg taatgacctg aataatgagc gcgatacgag
    57241 acagttcacc gcccgaagct actttgatca gcggttgatg cggctgacca gggttggtag
    57301 tgacgcagaa ttcgatgtgg tcggcgccgt tggcggtcag cgagtccggc gtgaaggtca
    57361 catcaatcgt gaaatgaccg ttcggcatcg ccagttcatg catgttggtc gtgatcaatt
    57421 ccgccagttc gctggcgtgc tgacagcgtc gggcgtgaag ttgttcggcc acatgcagtg
    57481 cttgctgatg gaattcttgc accgtgcgat tcagggtttc gtgatcgctt tcctgctgct
    57541 ccagtagatg ttgttcctgc aatagctgct gataaaacgt gggaagcgct tccggcgtca
    57601 cgtgatgctt gcgcgccagc gttagctggc gcgacaggcg ttgttccagt tcgtacaatc
    57661 ggattggatc cagttccata ctgtcgcaat aatggcgcag ttcatcgctg gcttcgctga
    57721 tttggatgcc ggcttcttcc agcatggaaa acacgctgga gagtttttca tccatgctca
    57781 ccagttctga aagctgatgt ctggcgctgt gcagcatgcc aagcaggttc tgatcttcgt
    57841 tttcgctgag aatttgcaac gtctgctggc tgagggacat cagttgtccg ctgttggcga
    57901 gccgcttgta ttcaacgtcg atctgttcgt actcgcccgc aaggggcgca aactcgttca
    57961 gctctttgag ctgatattgc agcaattccc ggcgcgcttc ccgctcgatg gtggcttgct
    58021 gatgctgcgc cagctcgcgg cagctttgat gccattgttg ccagatctgg cgcatggcgc
    58081 tgagtagttg cgattcatcg gcgtaggcat ccagcagatg gcgttgatgt tccggtttta
    58141 gcagcaactg gtgggcgtgc tgcccatgaa gctgaatcag atgctggccc agttcgcgca
    58201 gttgcgacag cggcaccgcc gtaccgttga tgaatgcgcg ggagcggccg tcggcgctga
    58261 tgacccgacg cagcaggcat tcgttgttgt catcaagctg gttgtgttca agccagcgca
    58321 gcgcggccgg tgtatctgcc agcgagaagc gggcgcagat atcggcgcgg ccggtgccgg
    58381 gccgaaccat gttggcgtcg gaacggttgc cgagacagag gccgagggcg tcaatagcaa
    58441 tggatttccc cgccccggtc tcgccggtaa tgacgctcat ccctgcctga aaatcaattt
    58501 ccagttcgcg cacaatggcg aagttactga ttgtgagttg cgccagcatg atagtgtcct
    58561 gtatgtaaca ataactgtta ttacatacag tatagactgg ttttttgtac agtaaagtag
    58621 caagcgctac tttcagaata attttttcga ccagccgagc ttgctgctta gtgtattgaa
    58681 ataactgtaa ttttcagggt gaattaggtt caggtgatac tggctgcgtt ggatcagcac
    58741 ttcttcgcct tcctgcaccg gcagcgaaat ctggctgtcg cagctgatct ctaggtcctg
    58801 ggtgatgtgg gaaaacttca gtcggatagc gctgctgctg ttgatcacca gcggccgcgc
    58861 cgacaaggtg tgcgggaaca tcggcaccag cgcgatcgca tccagcgacg gggtcaggat
    58921 cgggccgccg ccggatagcg aataggcggt ggagccggtg ggcgtggaga taatcaggcc
    58981 gtcggagcgt tgggagaatg cgaatttatc gtcaatatag acttcaaatt caatcatatg
    59041 cgccactttg cctgggtgca gcaccacctc gttgatggca gtgctgctgc tgttggggtg
    59101 gttggcgcgg cacacctgtg cttccagcat aaaacgctgc tcgcggatat aacgcccggc
    59161 cagcacttcg cttagctgct gctgggtatg atccggatcg agatcggtaa ggaagccaag
    59221 attgccgcgg ttgatgccaa tgacgttgat atcgtagcgc gacagcaccc gcgccgcgcc
    59281 cagcatgttg ccgtcgccgc cgaccaccac cgccaggtcc gcctgctgac cgatttccga
    59341 caggctgccg gtggcggcgt ccgttagctg caactcgcgg gcgatctgct gttcgataac
    59401 cacgtggtaa ccttgtgcgc gtagccagtg atacagcatt tcgtgggtgg tcagggcgtt
    59461 tggatgacgc ggatgaccga cgatgccaat gcagttaaac gatctgttca tttgggtgac
    59521 ttatcctcat gagagcaccg gaggctcacg gtttttggac cgatagccgg gccaacaata
    59581 tgtgagtggt tcccttgaat gtgagtggtt ctcttgaaac cccggttttg atccccataa
    59641 taagcgaact agcgagatga atgcgaaaaa cgcggagaat ttcatgagta gtaaagaaca
    59701 gaagtcgcct gacgagcaag tcttggatca aaaggaagca gcggaaggtc agcaagcaga
    59761 tgccgtacca gagacgacag ctgtcgctga cccgcgtgat gagcgtattg cagaactgga
    59821 agcgcaactg aacgacgctc agcagcgtga gcgtgaaagc gcgctgcgtg cccgcgccga
    59881 aatggaaaac gttcgccgtc gtgccgagct ggatgtggaa aaagcgcata aatttgcgtt
    59941 ggaaaaattt gcgggcgaaa tactgccggt gatcgacaat cttgaacgtg cgctggagat
    60001 ggcggacaaa tccaatgacg cgctgtcagg catgattgaa ggggttgaac tgacgctgaa
    60061 agcgatgctt tccgccgtga ataagttcgg cattgaggtg gtggcggacg tgaacgtgtc
    60121 gtttaatccg gaaattcatc aggccatgac gctgcttgaa tctgccgatc acgcgccgaa
    60181 ccacgtcatg atggtgatgc agaagggtta taccctgaac ggccgtttgt tgcgcccggc
    60241 gatggtcgcg gtgtccaaag ccaaggaata attgtttccc ggctttctcc ggggagcagc
    60301 ccgcaggctt cttcccggaa tgggccgtga atctgatgtt tgttggtctt tctttctctt
    60361 tctttctctt tctttatttt ccttccttcc tttatttctc ttgctgcttt atcccgttta
    60421 cgcatttttt cctggcgtca tcgcatggaa ggtatttatt cgtgtgacgg tatttattcg
    60481 cgtaatgccg tgccagtcgt tttttgttta tattttgtta atctttatgt attaaaacgt
    60541 gtgtcgtttg tcggttgaat gcatcattat cataacctat cagagcaatc atcacttcca
    60601 tcctaaacgc acttgataat cattatcgac tctgcgaagg taataaacag tttcgaaggt
    60661 aataaacagt ttcgaaggta ataaaccatt gcgaagctaa taaaaaatag tgttagaagg
    60721 gttactcata tgccggggag tcgtgtagtg gagtcagtca gccgtacgtc gaggaagctc
    60781 aagctttcac tgatggggcc ggcttttatc gcggcgatcg gttatatcga tcccggtaat
    60841 ttcgccacca atattcagtc gggcgcagcc tacggatatc agttgctgtg ggtggtggtg
    60901 tgggccaacc tgatggcgat gttgattcaa ttactctccg ctaaactggg gatcgctacc
    60961 ggcaagaatc tggcggagca tattcgcgat cgtttgccga aacccgcggt ctgggcctac
    61021 tgggtgcagg ctgaaattat cgctatggcg accgacctgg cagagttcat tggcgcggcg
    61081 atcggcttta agctattgct cggcgtgtcg ctgctggaag gcgcgatcct caccgggatt
    61141 gctacttttc tcatcctgat gttgcagcaa cgcgggcaaa aaccgctgga gatggtgatc
    61201 ggcgggttgc tgttgtttgt ggcggcggcc tatattgtcg aactgatttt ctctagcccg
    61261 gaactggcgt cgctggcgaa aggcatggca gtgccgagcc tgcccaattc cgatgcggtg
    61321 ctgctggccg ccggcgtgct gggtgcaacc attatgccgc acgtgattta tctgcattcg
    61381 tcgctgacgc agcaacaaag caacatcacc cgcgccgagc gctattccgc caccaaggtg
    61441 gatgtcgcgg tggcgatgac catcgccggg tttgtgaatt tggcgatgat ggcgacggcg
    61501 gcggcggcgt ttcacttcag cggcaacacc tcgattgccg agctggatca ggcgtatctg
    61561 acgctgaaac ccttgctggg gcaagcggcg gcgacgattt tcggcctgag tctggtggtg
    61621 gcggggctgt cgtccacggt ggtggggacg ctggccggtc aggtggtgat gcaggggttt
    61681 gtgcgctttc atattccgct gtgggttcgc cgcgtggtga ccatgttgcc gtccttcatc
    61741 gtgattctgt ccggtatgaa cccgacccgg gtgctggtgt taagccaggt gctgttgagt
    61801 ttcggtattg cgttggcgtt gattccgctg ctggttttta ccggcgaccg cgaattgatg
    61861 ggggggctgg tgaatagccg tcgggtacag aatattggca aggtgatcgt ctgtatggtt
    61921 atcgcgctca atctgtatct ggtgctggat acgctgctgg gttaacgcgc tcgcctgttc
    61981 tttacgacgc ctccgccggg ttatggtcgg gggcgtttgc tttttctgct tacgactatt
    62041 ctgctttcat cttacgatca cgtgcattcc ggcaagctcc gtcctattat ctgggactga
    62101 ttttttgata cagagattca atgatgtcgt cgcccattac tattcttgat aagcaactgt
    62161 tatccgatca ctggtttgtg ctgcataaat atgtgttcga tttgaaacgt aagaatggcg
    62221 gcatagtgcg ccagatgcgg gaagtgtatg accgcggcaa cggcgccgcc atcctgctgt
    62281 acaaccgtgt tcgggggacc gtcgtgctga cgagacaatt ccgaatgccg acttacctga
    62341 atggcaatga aagcggaatg ttgctggagg cgtgcgccgg tttgctggac gatcagtcgc
    62401 cggaacagtg catccgtaat gaggcaatcg aagaaaccgg ttaccagata ggcgaagtgg
    62461 aaaagttgtt tgaagcctac atgtcaccgg gtggtgtaac cgagctggtg catttttttg
    62521 ccgcggaata tgacgattca cagcgtaaaa cgaacggcgg cggtgtggat gatgaggata
    62581 tcgaagtgct ggagttgccg tttaacgacg cgctggcgat gattaaggac gggcgtatcc
    62641 gtgatggtaa aaccatcatg ctgttgcagc acgcgcagat taacggctgg tttgccaaca
    62701 tgcgctaacg gcatataaag actgtaaaca tcaagggggc cggtaggctc ccttgttgtt
    62761 tgtggcggag ccgtgttgac aagcgatacc ctcggtatct ggtgatattt ggccgggtaa
    62821 accgtcgtta tggtaagtga ttttcaatct tattaattaa ttatattaag cgatattccg
    62881 gcgtggattt tgtaatgctt catagtttcg aaaatcacag acacgataca ctgggcaacc
    62941 tgccacccta ctaacaaagc gataagacaa ggtaataaac tatggatgaa caactgaagc
    63001 aaagcgcact ggacttccat caatatccgg tgccgggaaa aatccaggtt tccccgacta
    63061 aaccgctggc cacgcagcgc gacctggcgc tggcctattc cccgggcgtt gctgcgcctt
    63121 gtctggaaat cgctgaagat ccgctggcgg cttacaaata taccgcgcgc ggcaatctgg
    63181 tggcggtgat ctccaacggt accgccgtgc tggggctggg caacatcggc gcgctggccg
    63241 gtaagccggt gatggaaggc aaaggggtgc tgttcaagaa attctccggt gtcgatgtgt
    63301 ttgatatcga agtggacgag caggatccgg acaagctgat cgacgtgatc gcggcgctgg
    63361 agccgacctt tggcggcatc aacctggaag atatcaaggc gccggagtgc ttctacattg
    63421 agcagaagct gcgcgagcgc atgaagattc cggtattcca cgacgaccag cacggcaccg
    63481 ccattatctg taccgcggcg gtgttgaacg gcttgcgcgt ggtggaaaaa cagatttccg
    63541 acgtccggct agtggtgtcc ggcgcgggcg cggcatccat cgcctgcctg aatctgctgg
    63601 tggcgctggg gctgaagcat gaaaacatcg tggtgtgtga ttcccgcggc gttatctaca
    63661 aaggccgtga agccaacatg gcggaaacca aagcggcgta cgctattgat gataacggca
    63721 gccgttcgct ggccgacgcc attccaaatg cggacatttt cctcggttgt tccggtccgg
    63781 gcgtgctgac gcaggacatg gtcaagacga tggcgccgcg tccgctgatc atggcgctgg
    63841 ctaacccgga gccggaaatt ctgccgccgc tggtgaaagc agtgcgtccg gatgccatcg
    63901 tctgcaccgg ccgttccgac tatccgaacc aggtcaacaa cgtactgtgt ttcccgttca
    63961 tcttccgcgg cgcgctggat gtgggcgcga ccaccatcaa tgaagagatg aagctggcct
    64021 gcgtacacgc cattgccgac ctggcgctgg cggagcagag cgaagtggtg gcatccgctt
    64081 atggcgatca ggatctctcc ttcgggccgg aatacctgat ccctaaaccg ttcgatccgc
    64141 ggctgatcat caagatcgcg ccggcggtgg cgaaggcggc gatggcgtcc ggtgtggcga
    64201 cccgcccgat tgaaaacttc gacgattaca tcgagaaact gacgcagttc gtctacaaaa
    64261 ccaacctgtt catgaagcct gtcttctctc aggcccgcac ccagccgaaa cgcgtggtgt
    64321 tggcggaagg ggaagacccg cgcgtgctgc acgccacgca ggaactggtg tcgctggggc
    64381 tggcgtttcc ggtattgatc ggccgtccgg gcgttatcga aaaacgcatc cagaagctgg
    64441 gcttgcagat tgccatcggc aaggatttcg aggtggtgaa caacgaatcc gacccgcgct
    64501 tcaaagccta ctggaccgaa tattttgaga tgatgaaacg tcgcggcgtg tctcaagagc
    64561 aggcgcaacg cgacatgcgc ggcaacccga cgttgatcgg ctccatcatg gttcaccgcg
    64621 gcgaagcgga tgcgatgatc tgcggtacgg tcggtaacta tgaagagcac ttcagcgtgg
    64681 tagagaaagt gttcggctat cgtgatggcg tgcatgtggc gggcgcgatg aacgcgttgc
    64741 tgttgccgag cggcaatacc tttatcgccg atacctacgt caacccggac ccgacgtcgg
    64801 aacagctggc ggagatcacc ctgatggcgg ccagcaccgt gcgccgtttc ggtatcgaac
    64861 ccaaagtggc attgctgtcg cattccagtt tcggcacgtc tgattcgccg acggcgaaga
    64921 aaatgcgcgc cacgctggaa cgggtgaaca agctggcgcc ggagctgcaa atcgacggcg
    64981 aaatgcacgg cgacgccgcg ctggtggagg ctatccgtcg tgagcagatg ccgaacagcc
    65041 cgctgaaagg cgcggccaat atcctgatca tgccgaacat ggaagccgcc cgcatcagct
    65101 acaacctgct gcgcgtgtct tcctccgaag gcgtgaccgt cgggccggtg ctgatgggcg
    65161 ttgccaagcc ggtacacatt ctgacgccga tcgcctccgt gcgccgtatc gtcaacatgg
    65221 tcgcgctggc ggtggtggaa gcacagaccg agctgctgta atccggcaga ctgctgacaa
    65281 cgaaaagacc aaaccggcag attaccctgc cggttttttt acgcctgctg gcgcagccat
    65341 ttctccagtt cgttagcgaa ctgctggcgg tcgcgctgat ttaatgcagc cgggccgccg
    65401 gtttgtaccc cgctggcgcg cagcgtatcc atgaaatccc gcatcgttag ccgctcgcgg
    65461 atggtatccg gcgtgtaacg ttcgccgcgc gggttgagcg cgaccgcctg tttttccagc
    65521 acttcggccg ccagcgggat atccgcggtg atcaccagat cgcccggctg aacgcggcgc
    65581 acgatttcgt tatccgccac atcgaatccg gcggcgacgc gcaaactgtg aatgtgcggc
    65641 gaaggcggcg ttttaagcgg ctggttggcg accagcgtca ggcgcgtcgc ggtgcgatcg
    65701 gcggcgcgat agagcacgtc tttaatcaca ttgggacagg cgtcggcgtc cacccagatg
    65761 gcggtcatcc gcgtgctccc gacggcgtat tcaggccgag ccagtcgcga gcgggcagga
    65821 agtcgcggta cagcgccgct tccgggctgt ccggctccgg ttggtactgg tattcccagc
    65881 gcaccagcgg cggcagcgac atcaggatcg actcagtgcg cccgccgctt tgcaggccga
    65941 acagcgtgcc ccggtcccac accaggttga attctacata gcgcccgcgg cgataaagct
    66001 ggaactggcg ctcccgctcg ccccacggaa tgtctttgcg gcgattgacg atcggcaaat
    66061 aggcgtgccg gaaaccttcg cccaccgcgc gcatgaaggc aaagctggcg tcgaaatccg
    66121 gtgtgttgag gtcgtcgaag aacaagccgc caacaccgcg cgcttcgttg cggtgtttga
    66181 ggacgaagta gtcgtcgcac cactgcttgt aacgcgggta gacgtcgtcg ccgaacggtt
    66241 tacacaaatc gaacgcggtc tgatgccagt gaacggcgtc ctcttcaaaa ccgtagtacg
    66301 gggtgagatc gaaaccaccg ccgaaccacc ataccgccgg ttcgcccggt ttttcggcga
    66361 tgaaaaagcg gatgttggca tggctggtcg ggacatacgg attcagcgga tggacaacca
    66421 gcgaaacgcc catcgcctga aaactgcgtc cggccagttc cggacggtgg gtgctggccg
    66481 acggcggcag cgaggtgccg gaaacgtgag agaaattcac tccggcctgc tcaaatacct
    66541 gcccctgacg cagaacgcgg ctgcgtccgc cgccgccgga ggcatgctgc caggcgtctt
    66601 caataaaggt ggcggtgcca tcggttagtt caaactgtcg gcacaggttg tcctgtaacg
    66661 tgagcaaaaa gtgcttgatc gcgttgatat caggtgagct catagtgtcc cttatgatga
    66721 tgttgaaagg cgattgggct tattccctgg gtttattagt cctagtatat cggaattcgg
    66781 caggccgcct atcgccggct aatgccgtcg gcgtgaattg gcgccatt
//
