# Supplementary material for: May the Phage be With You? Prophage-Like Elements in the Genomes of Soft Rot Pectobacteriaceae: Pectobacterium spp. and Dickeya spp
Source: Front Microbiol. 2019 Feb 14;10:138. doi: 10.3389/fmicb.2019.00138 (PMC6385640; doi:10.3389/fmicb.2019.00138)
Supplement: Supplementary file 2 [file Data_Sheet_2.ZIP › Supplementary_prophagesGENBANK_files/Genbank FILES _SRP_prophages/phiDdi6.gb]

LOCUS       Exported               56282 bp ds-DNA     linear   UNK 02-AUG-2018
DEFINITION  phiDdi6.
ACCESSION   .
VERSION     .
KEYWORDS    .
SOURCE      phiDdi6
  ORGANISM  phiDdi6
REFERENCE   1  (bases 1 to 56282)
  AUTHORS   .
  TITLE     Direct Submission
  JOURNAL   Exported Aug 2, 2018 from SnapGene Viewer 4.2.3
            http://www.snapgene.com
FEATURES             Location/Qualifiers
     source          1..56282
                     /organism="prophage phiDdi6"
                     /mol_type="genomic DNA"
                     /note="/genome_id=6666666.356837"
                     /note="/genome_md5="
                     /note="/project=robertczajkowski_6666666"
                     /db_xref="taxon:6666666"
     CDS             complement(267..707)
                     /codon_start=1
                     /product="Phage integrase"
                     /label=Phage integrase
                     /db_xref="SEED:fig|6666666.356837.peg.1"
                     /translation="MAKIAKKLTDTEIKNTKPAEKEINLFDGDGLMLRIAPLSVGGKKN
                     WYFRYAVPVTKKRTKMSLGTYPHLTLAKARTLRDEYLSLLANGIDPQTHNNDKANALKD
                     ATEHTLKAVAKKWLDEKVNPLVSHKIMQKTSGEASNEISSPV"
     CDS             1009..1554
                     /codon_start=1
                     /product="hypothetical protein"
                     /label=hypothetical protein
                     /db_xref="SEED:fig|6666666.356837.peg.2"
                     /translation="MDRITAIERLNAFDKQGRYVFTSRDLAKIFHEDRPRAFNAGLTRL
                     VKDGILTRAIRGVYVYNHAKSKDAYTLERIVLALRRGEYNYLSLESALSEYGVISQIPI
                     GRITVMTTGRSEEHKTPFGVIEFTHTKRPPEQILQDTYLGNSPLRQATKQTAVRDLRRV
                     GRNTHLIDESELYHESES"
     CDS             1538..2455
                     /codon_start=1
                     /product="hypothetical protein"
                     /label=hypothetical protein
                     /db_xref="SEED:fig|6666666.356837.peg.3"
                     /translation="MNQKVNFAELVSKAMESAELEGLRNVVEKELLHYDILYCLDSAGL
                     LEQLTFQGGTSLRLCHGGNRFSEDLDFAGGIAFSGADLKNMKACIEDYLGNRYGLEVNV
                     KEPNELRNEPGYEEVRIDKWQVSVTTAPEKRDMPKQRVKIEIANIPAYTRMPMALKRNY
                     DVLPDGYSDTLVMCETLNEVMCDKLVSLVATTKYIRYRDVWDLPWLIQQNATYDLDLIR
                     KKIQDYRIPNYDELLAHRIQSIEQIVGDGRFSAEMRRFLPQAVFDRTLGREAFSQYLSG
                     ELKTLLSTLQQELNGQGGKAPFIM"
     CDS             complement(2694..3287)
                     /codon_start=1
                     /product="hypothetical protein"
                     /label=hypothetical protein
                     /db_xref="SEED:fig|6666666.356837.peg.4"
                     /translation="MPSLGVAEFSSIAVNTSPQTKINKIKSIANRPEYHPGKDFYKKIR
                     DAIKRLIVKKGHISELYDLCRKEKNSSKKIYFEKIVNVFNEWQSGKNITGFPAPKRYYH
                     YAKTDISCNPELNVNFQGRSKLVKLHFSNSEKMTQERANFICFLMERAIGDQGFEYSVL
                     DLTSGKEFFFSGNKEKQEIRVNKEIQFIEAHWED"
     CDS             complement(3536..5860)
                     /codon_start=1
                     /product="DNA primase (EC 2.7.7.-), phage related"
                     /label=DNA primase
                     /db_xref="SEED:fig|6666666.356837.peg.5"
                     /translation="MAQPTVTQAVKRASGHWPQLLPLLGISVDAAGRHSACPVCGGKDR
                     FRFDNKEERGTWFCNQCGAGDGLNLVEKALNLTPTDAALKVSALLGTLPDSPAASTSDD
                     DDNDAARQRAAVQAQAKIKETVTQSGNAYLSAKGWPDVEVLTLQGKPLRMGGIVYQSGD
                     VLVPLTTHDGEVVNIQLINAQGDKRTLKGGQVKGTFYCFSGKHTTVIWLAEGYATGLTL
                     YQLTGDTVYVALSANNLSSLARELKTRHPAATLLIAADRDENGTGQSKAGQAASAVHGR
                     VALPPIFGDWNDVYRREGADVTRHYLTEFIQPEKASPFESLGEAEFKAMSASEKAEKIR
                     DHYRNTLAIDAFGETFFQYQNGAWKALPYRLLSRDIAVLFQKIQAPFTASSIGSVLDTL
                     KLIIPMQAKPQRRLIGFRNGVFDTVSGEFKPHRRENGLHTVNDVDYTPLKAGENLADNA
                     PHFWRWLTRAAGHNEDKQARILAALFMVLANCYDWQLFLEVTGPGGSGKSILAEIATML
                     SGEDNTTAATINTIESSRERASLIGFSFIVLPDQEKWSGDGAGIKAITGGDAVMVDPKY
                     RDAYSTRIPAVILAVNNTPMRFSDRSGGVSRRRVIIHFSEPIPASERDPKLKEKIRAEL
                     AVIVRHLMKRFADPNNARTLLQAQQHSAEALEIKRQADPLVDFCGYLQAHSGTTGLYMG
                     NANITPRNPRKYLYHAYLSFMESHGHQKPISLTAFGKVLPNIMSEYGLVYLKGRTKQGI
                     QTNLELKGESDADWLPKCDRA"
     CDS             complement(5871..6083)
                     /codon_start=1
                     /product="hypothetical protein"
                     /label=hypothetical protein
                     /db_xref="SEED:fig|6666666.356837.peg.6"
                     /translation="MFDVTPLTAEEITDQCRALTYAVIELDNPMAKEVLLFVLAERLEV
                     LSATLDMPDAIDNLNDPGQTDSTLH"
     CDS             complement(6076..6273)
                     /codon_start=1
                     /product="hypothetical protein"
                     /label=hypothetical protein
                     /db_xref="SEED:fig|6666666.356837.peg.7"
                     /translation="MATTPTPSHPQFTFLFLAVRRAELRALPHREAVIAPDEISARRLL
                     ARDYVLSFAGRLPLRGARHV"
     CDS             complement(6628..6774)
                     /codon_start=1
                     /product="hypothetical protein"
                     /label=hypothetical protein
                     /db_xref="SEED:fig|6666666.356837.peg.8"
                     /translation="MITLAIAGQSTTLDERETLSLCDQLLAAASDSPRHYCTSRAGDAL
                     TNC"
     CDS             complement(6771..6956)
                     /codon_start=1
                     /product="Transcriptional regulator, AlpA like"
                     /label=Transcriptional regulator, AlpA like
                     /db_xref="SEED:fig|6666666.356837.peg.9"
                     /translation="MRLPEVLHVTGISRSTLYELSSRNAFPARVPLGGKNVAWVESEIH
                     HWVAERIAARQQENHA"
     CDS             7018..7149
                     /codon_start=1
                     /product="hypothetical protein"
                     /label=hypothetical protein
                     /db_xref="SEED:fig|6666666.356837.peg.10"
                     /translation="MADNIGRYLVNVRPALAGWRWIYLVARYYVNICSGGNKGKKGD"
     CDS             7149..7274
                     /codon_start=1
                     /product="hypothetical protein"
                     /label=hypothetical protein
                     /db_xref="SEED:fig|6666666.356837.peg.11"
                     /translation="MDKKRSGTTVNSQRCPIFANISQFYTFDKNQIIGGYLYGLN"
     CDS             7575..8306
                     /codon_start=1
                     /product="FIG070121: Phage capsid and scaffold protein"
                     /label=FIG070121: Phage capsid and scaffold protein
                     /db_xref="SEED:fig|6666666.356837.peg.12"
                     /translation="MSQTTPQSDIPDVLKKMADNYLKAREAHLANASELDNIMTAMRRA
                     KAQQTATEAENQLSDTEWRARFLKARGEMTEELKALQLQRLAQRELAHEYDGLLAQLEI
                     DQLRQQATCHASAKACCNAHASALRDYAEWELSQALDRISTALIRAIKLKQHMLGITTS
                     EFTEGLSYQKPDKVVMEQVVNCLIAKSNNYRFEMDNEPVLSVLGLDSPSLPHADFPPVA
                     NPIARHRAGFFLRLFLWLALF"
     CDS             8326..8523
                     /codon_start=1
                     /product="hypothetical protein"
                     /label=hypothetical protein
                     /db_xref="SEED:fig|6666666.356837.peg.13"
                     /translation="MNLHVKLTSQLALSRQYWHGLSDFMQLHENCYIKWVGVAGAQLRA
                     GSFSVYGCDWYHFYIQMNYR"
     CDS             complement(8514..8633)
                     /codon_start=1
                     /product="hypothetical protein"
                     /label=hypothetical protein
                     /db_xref="SEED:fig|6666666.356837.peg.14"
                     /translation="MIRVTERSQRTCNLKYDEYITFLLISDENHKISFILIYL"
     CDS             8748..10496
                     /codon_start=1
                     /product="predicted ATP-dependent endonuclease, OLD family"
                     /label=predicted ATP-dependent endonuclease, OLD family
                     /db_xref="SEED:fig|6666666.356837.peg.15"
                     /translation="MKISFFGVNNFRAISGGIDNNKIIFKDTNTLFVYGANNVGKSTFL
                     KAYLFFYSNEKPIIDDFFRRDDKNSIEFELEVKLDDLDKERIEDKAPKQKESYKRYLNN
                     DYIRIKKVWSKNGAKIEDKNYTFDYSKGEGGEYDEVGYATIGLHQVFQSCLPKPVFIKA
                     MPTEEEAKKILNEILKMMAESTLKKSELEELKVAQDKIKELQDKMYDSDLIETYQNSVN
                     GYFNKIFFDTTICFKDQKDRVVWTENKLGRDFEIEFMKRNSDGEYDGSIPSSYSSVGHG
                     AIRTAIFTLLLMRDVAERFERRQGRKDYMVLFEEPELFLYPRMIKELRELIYQVSVEDL
                     PYQVLCASHSSSMIDLSKPKSSIIRLVKNSNGTKSYQINDQFLKEAKGIATNDELKQEM
                     YEVLRFNPYICESFYADEVLLIEGPTEEIISRAFFQEFPPKKTIFVLNCGTVNNIPFYQ
                     KIFSRFNIKYHVICDTDKAKIVEYDQAGNPSFDSGIQKTISDQYRSDYDVTNGNIGLLR
                     VHNVTFEPAHQNVDIPEILRFADFGDRSKPFNANLYWKNVLKPNIAHQDINKVPIIRYL
                     KEIMAH"
     CDS             complement(10531..11718)
                     /codon_start=1
                     /product="Phage integrase"
                     /label=Phage integrase
                     /db_xref="SEED:fig|6666666.356837.peg.16"
                     /translation="MARTTRPLTHIEVQKAKAADKDLTLHDGNGLFLLVKTTGKKLWRF
                     RYQKPTTGQRTMIGFGAYPALSLADVRAMRDEKLSLLAKGIDPQEKVAKEVEEAQIAVE
                     SLFINVARSWFTLKQATVSTDHAKDIWRSLEKDVLPAIENIPVQQIKARTLIQALEPIK
                     ARGALETVRRLVQRINEIMVYAVNTGLIDANPASGIGMAFERPKKQHMPTIRPEELPAL
                     MRTIAMSNLSIPTRCLLEWQLLTLIRPAEASATAWAEIDIEKKTWSIPAERMKAKRDHI
                     VPLSEQALELLDIMRPISGNRDYVFPSRNDPKKPMNSQTANAALKRIGYGGKLVAHGLR
                     SIASTAMNEAGFNPDVIESALAHCDKNEVRRAYNRSTYLEQRKELMDWWGLGVHK"
     CDS             complement(11996..13087)
                     /codon_start=1
                     /product="Phage integrase"
                     /label=Phage integrase
                     /db_xref="SEED:fig|6666666.356837.peg.17"
                     /translation="MAVRKLASGKWLCECYPFGREGKRVRKQFATKGEALAFERFTMEE
                     SENKPWLGEKADNRSLREIIDLWFSLYGRTLADPKRMMAKLDIICTGLGNPKARELSAA
                     DFAHYRELRLAGQMTDASGIPLSVVKPRTVNLEQRNLSAVFGTLKKLGHWDAPNPLSGL
                     PTFKIAQQELAFLAPNEIKRVLDACAESANPHLLLVTKICLATGARWSEAEGLSGQQVT
                     PYRITYTRTKGKKNRTVPISRELYDEIPRKSGKLFSPCRKTFERAINRTGIQLPDGQCT
                     HVLRHTFASHFMMNGGNILVLRDILGHADIKMTMIYAHFAPDHLEDAITKNPLNGLNWS
                     PKNGGKLAAANGNQAFSSPLITK"
     CDS             complement(13283..13939)
                     /codon_start=1
                     /product="Repressor protein CI"
                     /label=Repressor protein CI
                     /db_xref="SEED:fig|6666666.356837.peg.18"
                     /translation="MNCDQSTFCVQAKFTITFGFSQTKSIHLVNFMDFGTGAKAAIERL
                     VEAYGFKNRQALCDHLGVSKSTLANRYMRDSFPADWVIQAALETGVSLRWLATGEGPKF
                     DDARNDVIAIPRQKLIDGKLYDSNYYMFDKAFLSDGLKDPVVILDGDITYIADRQFDEV
                     VDGKWLVEIEGRTSIRDLTRIPVGKVRVSGAGAEFDCGLGDIQIIAECKGFYKGL"
     CDS             13976..14197
                     /codon_start=1
                     /product="hypothetical protein"
                     /label=hypothetical protein
                     /db_xref="SEED:fig|6666666.356837.peg.19"
                     /translation="MRPQISITLAVPSVSIEKYSELTGLSIDTINGMLADGRLTRHRLR
                     KDKKREKVMINIAAMTVDALADCDISLN"
     CDS             14230..14739
                     /codon_start=1
                     /product="Transcriptional regulator"
                     /label=Transcriptional regulator
                     /db_xref="SEED:fig|6666666.356837.peg.20"
                     /translation="MFDYQITKQTHFDEACRAFSLRHNLAELARTAGMNQQILRNKLNP
                     DQPHKLTCEELLTLTDITEDATLIDGLLAQLNCLPAVPVNEARAERLTAYVLQATAAVG
                     KVAAESVSDERMTQTRRHSLMSTISDGVRYLSLIGLTVQSRIQANPAMASTLDALSGLG
                     ASLTIG"
     CDS             15140..15469
                     /codon_start=1
                     /product="hypothetical protein"
                     /label=hypothetical protein
                     /db_xref="SEED:fig|6666666.356837.peg.21"
                     /translation="MSQSVDHQKWIQRCRDIVFKGESRAQSFWERAALDTREIILFSAK
                     PKLKSRHVNYSWHQFTAEERAAIWSAIKRIRSICDDTALFGPDDFLKTSNQSGTPNQPN
                     PSPIH"
     CDS             15541..15771
                     /codon_start=1
                     /product="hypothetical protein"
                     /label=hypothetical protein
                     /db_xref="SEED:fig|6666666.356837.peg.22"
                     /translation="MIATKLKPMNAAADGALIELLNKARLEERKDQHLSFSLRLAALAV
                     RAQQRDLSAAEVVELIRQESERFEHSAQELH"
     CDS             15771..16001
                     /codon_start=1
                     /product="hypothetical protein"
                     /label=hypothetical protein
                     /db_xref="SEED:fig|6666666.356837.peg.23"
                     /translation="MANSIRENVSDELLREICNGSPFTGAFENEVVEMARELIEFRTAA
                     ARDMQKLADLERAVEVLSHKVGSVSISRGAL"
     CDS             15998..16954
                     /codon_start=1
                     /product="Methyl-directed repair DNA adenine methylase (EC 
                     2.1.1.72)"
                     /EC_number="2.1.1.72"
                     /label=Methyl-directed repair DNA adenine methylase
                     /db_xref="SEED:fig|6666666.356837.peg.24"
                     /db_xref="GO:0009007"
                     /translation="MSTIATPLKWVGSKARVMDILREHLPAGDRLVEPFAGSCAVMMNT
                     DYPEYLIADINPDLINLYQVIKEDLKDFIDTAEGLFRTANTAESYYRFRQVFNRSKENR
                     ITSAALFLYLNRHGYRGVCRYNRAGGFNVPYGNYASPYFPLAEIQAFAEKARRAKFICA
                     AFGETLQLIRTGDVVYCDPPYIPQTPTASFTSYHTDGFTRNDQYDLCSALLRLAERGIP
                     VIASNSDTHHAHSIYHRFDICRFTAPRSVGVAAGESKQAGEIIAKRLPVPVASNIAKVC
                     DGCGYEGGGHCPDCGPVMGDATYQEMVASGALDADPF"
     CDS             16954..17244
                     /codon_start=1
                     /product="Cytosine methylase, phage-associated"
                     /label=Cytosine methylase, phage-associated
                     /db_xref="SEED:fig|6666666.356837.peg.25"
                     /translation="MQPLAYYNEIDPFAAQWLRNLIDAGHIAPGIVDTRSIEDVTPNDL
                     KGFSQHHFFAGIGVWSYALRRAGWPDGQPVWTGSCPCQPFSAAGKKKRVCR"
     CDS             17779..19833
                     /codon_start=1
                     /product="Putative replication protein"
                     /label=Putative replication protein
                     /db_xref="SEED:fig|6666666.356837.peg.26"
                     /translation="MTDLQIPEHNGAYHAVREWQREQFSPGEPAGLSYVERSLWHLNPL
                     DHQWRQQYLAGMPDYLAKYFGLRYEKLFKSDEHKGRRRANTFLLRTLGKSVLPRLRTVT
                     ERYQTQQHAAGDLPFPFYDDLEKLPVYDRDNIRALSQQLADFMAASLRDYTENRIRNTG
                     KLTDRHITLLSFRHLGLLTLQAGTQPPYWAQFTKGRHPLSTEKAESGLLRMMSPEWWRA
                     RLKRRRDIQREHMAIAVGQVQKAASPYVSRSTLDEWKEQKRRNREFFKAFELEDDEGNR
                     VSLDDKVNASNANPAIRRCELMVRMRGFEDLAQEMGCAGEFYTITAPSRYHAVHSGGGF
                     VEQWSGASPRDTQKYLCGVWARIRAELSREEISVFGFRVVEPHHDGTPHWHLLLFMRPE
                     HIEQVRDIMAYHARREDANELNSEKAQKARFHYEPIDPEKGSATGYIAKYISKNIDGYA
                     LDGEADEETGENLRDMAKAVSAWASRWRIRQFQQIGGAPVTVYRELRRLGDKQLDNAAM
                     DAVLAAADVGDWAAYTQAQGGPLVSRDALVVRLSYEVTERANQYAEDVQKVQGVYSPLL
                     GAPSAIITRTVQWKIVPKQATASAGAGVSGGSAAAWSSVNNCTPGLRRRLSELLRLRGF
                     PPDPGLVDVLMRGGHLAMSEGRALKMVSGRLEEVRQTGDCELWLGWNWG"
     CDS             20133..21653
                     /codon_start=1
                     /product="hypothetical protein"
                     /label=hypothetical protein
                     /db_xref="SEED:fig|6666666.356837.peg.27"
                     /translation="MYQYKSININDLMLDVQNSRFGDNVDGQREAIKVMVENQGQKIVK
                     LAKDIAENGVDPSERMIVVESDDEEKGFIVKEGNRRVTALKLIENPSLVQNKTLELTFE
                     KIKKSRKIRVLNVDCVVYDNEEYNHWINLKHTGQNEGAGRVGWTTPEQLRYMARNGKES
                     FANQLYSFIDLFPEHFENIIKNKSKVKITNLDRLIGDPSFRKSLNLNGVDGLLFCSQPL
                     NRFISELKKILDVMILTDDNGRPEFTVNRIRSKDDRANFISELGLTSFSPALEKEWRLL
                     EPPKSSSKDDGRQNEKGSQNDTNHEKNTAGDVDTGHEKSSGEHSTTGDGEGKNSGGSSD
                     TDDKAKGKKGSNPAGVKRNHMIPMGVSLKFGTKHKRCHRIFTELKRMTHEDHQNSLAVM
                     LRVFIELSLNTYIDINNLVYQDKKNPHKTPGLHDKVVMVSSNLFEKKIIDGPKKTAIQS
                     YSKQMTSSSASLQQYVHNANLIPEKEFVNTEWDNFQPLIEAIWGSIAS"
     CDS             21738..22598
                     /codon_start=1
                     /product="DNA-methyltransferase"
                     /label=DNA-methyltransferase
                     /db_xref="SEED:fig|6666666.356837.peg.28"
                     /translation="MRFYTPLRYPGGKGKLSYYIKSLLEANLITDGYYVEPYAGGAAIA
                     LDLVVNEYVRNIIINDADPAVYSFWHSVMHETDALCTMIEECNVTMDTWYEQKEVISSD
                     NPENSLALGFAAFFLNRTNRSGILKAGVIGGKAQSGEWKMDVRFKKDDLISRINKISGY
                     KNRIKVTNLDAIELLLNIKNLTSGSDKLLVYLDPPYYVKGQDLYRNYYEHKDHVAVKNA
                     LSESGINNWLVSYDNAEEIKEIYSAFRQSEYSLSYTAQSKRVGKEVMIFSDSLIIPDVN
                     LGKAA"
     CDS             22862..23017
                     /codon_start=1
                     /product="hypothetical protein"
                     /label=hypothetical protein
                     /db_xref="SEED:fig|6666666.356837.peg.29"
                     /translation="MDREFEQSLIVERIAFLAKNAGMEGNDERDRQIALIWIAELAGQL
                     MTLQAA"
     CDS             complement(23024..23344)
                     /codon_start=1
                     /product="Phage protein"
                     /label=Phage protein
                     /db_xref="SEED:fig|6666666.356837.peg.30"
                     /translation="MGHKTLKFSHILEAGAWNMRVLKIECPECGAKAVIRKTNRKHRQI
                     ADIYCACADVECGYTFVMNLTFSHTLSPSAKTGDQLLQTVLNNLKPEQRQMALDLLRTA
                     AA"
     CDS             complement(23344..24372)
                     /codon_start=1
                     /product="Phage portal protein"
                     /label=Phage portal protein
                     /db_xref="SEED:fig|6666666.356837.peg.31"
                     /translation="MKRTSHRRQKAQNAPRKKMSIITFGKPEPVLTTGTDYRDVWYDNE
                     FNHYTLPIDRLALAQLVNLNGQHGGILYARRNMVASDYQGGGLSHDDMLAAAFDYLTFG
                     DIAILKVRNGWGEVIALTPLPALYTRIRKTGEFVVLQKGEPLVYPPEDVIFIKMYDPQQ
                     QIYGLPDYIGGIHSALLNSEAVIFRRRYYHNGAHTGGILYTSDPNMTDEIEEEIERQLA
                     SSKGIGNFSTILVNIPNGDKEGVQFIQMGDISAKDEFANVKNISAQDVLNAHRFPAGLC
                     GIIPQNAAGLGDPEKARNTYRKDEVIPIQRRFMASINKDPEIPQNLHLIFDVGDDTTIQ
                     GA"
     CDS             complement(24369..26144)
                     /codon_start=1
                     /product="Phage terminase, ATPase subunit"
                     /label=Phage terminase, ATPase subunit
                     /db_xref="SEED:fig|6666666.356837.peg.32"
                     /translation="MAKYSDELIGVARLLYLKRATPKEIAADLNLPNARIIYYWAQKFG
                     WADLLSAESTEEAIERRYQLLAGRDKKTELELQEMDMLIAHAVKLRAQSNKHKEKLAAA
                     GHGNTPGSRSNDDDERPAKKRQYRKNDISSLTKEDFDAWADEHLFGYQKHLRLNIGQQV
                     RNILKSRQIGATWYFAFEAFENAVLTGEPQIFLSASRAQAEVFRSYIVNIAQQYFDITL
                     TGNPIRLSNGAELRFLSTNKNTAQSYSGHLYCDEYFWVPNFARLNEVASAMATHDKWRT
                     TYFSTPSAKTHQAYPFWTGEEWKRGNKKRAGVNFPGFDELRDGGRLCPDGQWRYVITME
                     DAIRGGFNLASLEKLRNRYNVDTFNMLYMCVFVDNKDAVFSFDDLERCGVDPATWQDHD
                     PTASRPFGNREVWGGYDPARSGDLSTFVIVAPPIYEGEKFRVLLVVNWHGMNFRYQANQ
                     IKKLFQRYHFTYIGIDVTGIGAGVFENIQHFAMRQATAIRYGVETKNRLVMKAADVVES
                     QRIEWDQDEKAIPASFMAIRRTTTASGNAMTFIADRSAETGHAEAFFAIAHALDNEPLN
                     YENKPQSRWRLKKAA"
     CDS             26154..26300
                     /codon_start=1
                     /product="hypothetical protein"
                     /label=hypothetical protein
                     /db_xref="SEED:fig|6666666.356837.peg.33"
                     /translation="MRRDFYFMTGVYFAVFVKASLSEWRRIKPVAARFLFRNNAVIRQK
                     RSM"
     CDS             26301..27137
                     /codon_start=1
                     /product="Phage capsid scaffolding protein # Fam Scf032"
                     /label=Phage capsid scaffolding protein # Fam Scf032
                     /db_xref="SEED:fig|6666666.356837.peg.34"
                     /translation="MSQLMTNWICIATEGETVDKRVMERQWLIDAAETYDPQLYTALIW
                     PEHETWFGNAGEVLALKAENGDDGLLRLFAQLRPNHQLLQANREGQLLFCSVELTPDGN
                     FRGTGKTYLEGLGVTNTPASVGTTRLRFSSKKRGRLFGALKPLVIDEVKEIKGNSMASK
                     SWHSLFGIKPKAFAEGEGESNDAGGDDKLQALAEALAELESRVTALESQQSQTTDAVEA
                     VQDDMDTVKEVVDTEDFATLRNNLPKILNNFGKLDRSITKLPQRQVGNKPKGFNFL"
     CDS             27192..28220
                     /codon_start=1
                     /product="Phage major capsid protein #Fam0066"
                     /label=Phage major capsid protein #Fam0066
                     /db_xref="SEED:fig|6666666.356837.peg.35"
                     /translation="MFLNQRAREYLSAYSVGLAQEYGVADTARYFALTDPKETQLRAAL
                     LERVDFLSMINVLDVDQLSGQVVSVGSSALHTGRKEGGRFIRQVGVEGNDYKLVETDSC
                     AALPWDLLSVWANAGGEDEFFQLVQAFSNEAFALDMLRIGFNGNSVAKSTDPDENPNGE
                     DVNIGWHQRMKDFKDGQQIITDRVVLDENGDYKSLDAMASDLINAKIPQQYRNDPRLVV
                     MVGADLVAAEQYRLFQKADRPTEKIAAQMLDSTIAGRPAIVPPFMPGKRMTVTTLSNLH
                     IYTQRNTRQRKAEFVEDRKQFENKYLRNEGYAVEYPELYASFDESAVTIGTVAEPAEKE
                     PA"
     CDS             28224..28925
                     /codon_start=1
                     /product="Phage terminase, endonuclease subunit"
                     /label=Phage terminase, endonuclease subunit
                     /db_xref="SEED:fig|6666666.356837.peg.36"
                     /translation="MALSPAQRHNARMVAEQQLSRCQAVSGDHSLHVQLRALENDVARL
                     RSQPTLRDRVEMKRRELLPRWLPTVQRYLDSGEVYQNPVFAHCVVWLFDVEEFDQGLAW
                     ADIAIAQGQHTPDNIRRTFAAFVADTVLAWAQQTADIGQSVEPYFSRTFKNVAENWRLH
                     EEITAKWFKFAGLLLLRDEQGQPRATAAADIDTLTAADALLHQAEQFYRQVGVGTMRRN
                     IAARIRALQKE"
     CDS             29022..29474
                     /codon_start=1
                     /product="phage head completion protein (GPL)"
                     /label=phage head completion protein
                     /db_xref="SEED:fig|6666666.356837.peg.37"
                     /translation="MFSGTPVDYQDELLANNGFWPDLNVRDFQSQRTIPADLAADTVAQ
                     ALLAAVGEVNADLAEVEASRRAKGFMRAQDVPGVSLKGQNVLCAQYQKAVFARAKADLL
                     GEFATIGRRESHPGQEGDDTRKGLLGEAAMVIRRMKGLKRATVRMV"
     CDS             29471..29968
                     /codon_start=1
                     /product="hypothetical protein"
                     /label=hypothetical protein
                     /db_xref="SEED:fig|6666666.356837.peg.38"
                     /translation="MSKLDDLTTFVSTHLPPRVMQGFDSFMDEVSFIPARRDLGEDQYQ
                     LAVMKFDAVLSWERWPYRVCDPRNLCALLLVWQEGQDDVPYMDAGLDMELPTLDVDVRD
                     QDSAIVVVSLQLAESLAIVADDNGIIPFDGRRWRLTSPEVWQATSGHLFGAGDDGAEVG
                     AS"
     CDS             29965..30669
                     /codon_start=1
                     /product="hypothetical protein"
                     /label=hypothetical protein
                     /db_xref="SEED:fig|6666666.356837.peg.39"
                     /translation="MIVHGELSQSQLAELRTALQRLTLPPKKRQRLLWRLAKYGVIAAA
                     KRNVRAQQAPDGSAWAARRGHRRGRMLRNLPNLLHIREMPEIQAVRIYLQGGGYRNGKT
                     PVPAGVVGYSQQNGMSVSVKRSQVGNGRPEPGRMATRRQARKLRALGYRVKRGARWKKP
                     PYREIEESLSFAQAGLLIRKLSGKAAKTAWTVDVPARPFLGMNDAEFTKALARQLQGIG
                     FGWDVKAQDIKG"
     CDS             30672..31787
                     /codon_start=1
                     /product="Conserved hypothetical phage protein"
                     /label=Conserved hypothetical phage protein
                     /db_xref="SEED:fig|6666666.356837.peg.40"
                     /translation="MSWPTVQVNQVNQLQGETSEIERVVLFIGEGSVETVKTVPVNTQS
                     DLDQVLGAADSVLKRDVSAAMVNAGQNWSAFVCLLPPKGDWVSAVTAAQQVASVEGVVV
                     SLPATKGIIAQASSLRSTLVSAFGRWVWFLLAVDSPKEGEGWDKYLQSLSNLQNGAAAP
                     AVQLVPRLWGNEPGVLAGRLCNRAVTIADSPARVQTGALLAMGRTDLPMDGAGVTLDLA
                     MLQALEKQRYSVPMWYPDYDGYYWSDGRTLDVEGGDYQAIENLRVVDKVARRIRLQAIA
                     KIADRSLNSTPGSIAAHQGYFAKTLRDMSRSTQINGITFPGEVKPPKDGDVVIAWRSKT
                     AVEIYLIVRTYECPKGITVSLVLDMSLEGSA"
     CDS             31784..32239
                     /codon_start=1
                     /product="hypothetical protein"
                     /label=hypothetical protein
                     /db_xref="SEED:fig|6666666.356837.peg.41"
                     /translation="MTKRISGQSFDFNMDGALVHAEKVSLSITDNTAAAQTQGIPDGWV
                     AGDVAAEGEMELSTKSLAVVTAKASSAGSWRGIDPVDLMWYAKAGSEEMKVEAFGCKLI
                     LSDILDVDPKGGSVMSHKIKFVVTSPDFVRINGIPYLESELTEKLIG"
     CDS             32248..32553
                     /codon_start=1
                     /product="Phage holin # possibly family II"
                     /label=Phage holin # possibly family II
                     /db_xref="SEED:fig|6666666.356837.peg.42"
                     /translation="MQEYEKNALGLLVLGALIALGKLLASDEKITPRLFFGRMILGSAT
                     SMAAGAALVWVPGLPPMAVTGLGAALGVAGHQAVEIWLRRRGSGLLKGSDAKDDVK"
     CDS             32540..32881
                     /codon_start=1
                     /product="Phage protein"
                     /label=Phage protein
                     /db_xref="SEED:fig|6666666.356837.peg.43"
                     /translation="MTLSEKQQLFTQLVAQLIQWAGERGYRLTFGEAYRTLEQAKLNAH
                     SGSGIANSLHTQRLAVDLNLFIDGEYQTRTEAYLPLGEYWESLGGCWGGRFTSRPDGNH
                     FSLEHNGVR"
     CDS             32881..33237
                     /codon_start=1
                     /product="hypothetical protein"
                     /label=hypothetical protein
                     /db_xref="SEED:fig|6666666.356837.peg.44"
                     /translation="MDGLWRVVAGLTVAFAAGWQTASWQRDSIDLAVTRAATAAAEQSR
                     QALQALASQSGEALESKLEALRNVPNKTVYREIVKPVFTNVCLSAEFVSLYNDAVNHTE
                     RVLSGKPEKEMSGQ"
     CDS             33194..33373
                     /codon_start=1
                     /product="hypothetical protein"
                     /label=hypothetical protein
                     /db_xref="SEED:fig|6666666.356837.peg.45"
                     /translation="MSYQENLKKKCPVNNLPRLSGTTGNDAAQPLISWPQIYADCAARH
                     NQLIDEITQRENMQ"
     CDS             33370..33627
                     /codon_start=1
                     /product="Phage protein"
                     /label=Phage protein
                     /db_xref="SEED:fig|6666666.356837.peg.46"
                     /translation="MSKITLSVSGKELSFEPNTVAYNGMINDMAMDNKVAPAVTYLRRI
                     VVAKDKETLDELLKLPGAALQITEAVNAQYAPKLEIEVKN"
     CDS             33815..35779
                     /codon_start=1
                     /product="Phage-related tail protein"
                     /label=Phage-related tail protein
                     /db_xref="SEED:fig|6666666.356837.peg.47"
                     /translation="MKQLDFTLSLIDKLTRPVKQAQAAVTGFAKSSRDAFSKIAVGGAG
                     LIGTAMSIQGALGPAVEMHGAMVEASARGVDDSALQKINANALKFSTQYGRSALEYVQS
                     TARINAAVGTLTKEDLPGVVRASNVMAAALKATADESSEFMGQMFANFRSDAESMGNVQ
                     FAEQLAGKAAYMRNAFGVELGAIKDLMEGARGVGTNYGIGMDEQLAVMGELQRTLGTEA
                     SSAYEGFLSGAVKGAQKLGLSFEDSNGKLLTMPAMLEKLRGKYGASIEGNLKAQSDLDD
                     AFGDSAAVIKQLYGNVGVLQRHITELGSNDGMTRATEMAQKMTSPWERLTAIWYAIRAA
                     MGATLLPVLYPLINKMADGGQVLVRWLNLFPNITRVIGYCVLAVLSLAGAGAIANIVMG
                     VSVFMLGGLKGLWKGLTAIMKIHVGVIWLYNKAVLAWAATMRILRGVLLAVRMASLLTG
                     MAFNIALWPVLLIIGAVALLVAGCSLLIRHWDGIKNAITQTDMWKTVAEKVQWVAEIFS
                     QTWKAIIDGWNRVVNAMGSFSLTETMGKMADGVGEIFSGLWDGILASFNSSYRWIIGKL
                     NAIPGINIAMPESVPRPGGEGLLTGGKIKGIDSGGLQRDISNSNAKNYTDNSRKVENLT
                     IYANKGFTPEQLTEWEALR"
     CDS             35779..36108
                     /codon_start=1
                     /product="Phage protein"
                     /label=Phage protein
                     /db_xref="SEED:fig|6666666.356837.peg.48"
                     /translation="MDDVKYIDLLITERDFSLNSGREPIFCNNRISIGQDCVHAIIESG
                     LTTKLVAERSPTLRADVLTQMIILVEDDERIIPGTVVISEESPTRLWVTAETYDFGPIT
                     ARVDV"
     CDS             36105..37289
                     /codon_start=1
                     /product="Putative bacteriophage protein"
                     /label=Putative bacteriophage protein
                     /db_xref="SEED:fig|6666666.356837.peg.49"
                     /translation="MTEKPKIDYEQVLKEAGMPVTAETVTEQFQAQVTASGLVTNTSRM
                     SPFWRLISVMATTPVIWLKDVLISVVLANMYLATASGPFLNLFAWGVNLSRKAATAAAG
                     VVRFYKSDAAQAVVIPAGTLIQTERINGTVFSVAVSVDTVIAAGLASADVPVTATADGG
                     AFNLAPGYYRILPVGVAGIERVENQEDWLLTPGADEESDDDLRERCRNQFNLVGNYHTD
                     AVYRSMIAAVAGLSIDRIFFQHDAPRGPGTANAYLLLDSGVVSQPFIDAVNDYITAQGH
                     HGHGDDLRCMALPETQHELTVTVYVRNLVNVTDEALAALRSGCQDLVRCAFRENTGYDV
                     AKTWPWSRFSFSTLAQELHDAFPLIASLDFSLGDIVSGLNVPRLASLTVVIADA"
     CDS             37282..37914
                     /codon_start=1
                     /product="Phage protein"
                     /label=Phage protein
                     /db_xref="SEED:fig|6666666.356837.peg.50"
                     /translation="MPDFKEQLSGLRLPSWMDKGEPAALLNASKAYWLQVNDWLRWPLQ
                     QLDVDTCAEPLLNVLAYQRDISRLKGEALTLFRRRVKYAFVNAQDSGSVAGFIAIFERL
                     GIGAVTLAERQPGYDWDVILVRINDEQLSGYNALMMSLVRQYGRTCRRYVFDLWNGETQ
                     SVRCGEFEHNAEYYHAVSLMPAGTVTARVALHPVRTSASTEYYSANV"
     CDS             37923..39344
                     /codon_start=1
                     /product="alternative bacteriophage tail fiber C-terminus"
                     /label=alternative bacteriophage tail fiber C-terminus
                     /db_xref="SEED:fig|6666666.356837.peg.51"
                     /translation="MAQSVITHAFETWNVQRVLDGTAARPDQVVFARVPGQDESVPVDR
                     NEGLPPADQIQHTAAITQAGVLNENAVVYSVVLDTTVGDWDYNWIGLLDSKTNTVLMIV
                     HVRTQQKLATRNGQQGNSLTRNLMMQFDGAAAATQINVTADTWQIDFSARLAGIDERIR
                     IENMDRYGSSAFFGNAYQVVKDGNAYVVKAGVAYAAGLRAWLSSDLKITVDALPTRVFL
                     DVCWRGEFTQAWAVDSQIVVANSADHEIRDGVQHYLLPVADIDENGNITDWRKQGSLAE
                     QNAQTLYLRKDDNLAALRDKEASRKNLGLGQLAVMDTDTARQTLRITQLENELVGIPLP
                     YPGATAPDGWLKCNGQSFNKSMYPLLAGRYLSGFLPDLRGEFIRGWDDGRGVDAGRSLL
                     SAQTQTVQDHKHVGTMVNSNPLQTGMNTGIGLLSQYTSTPTVGYSNEISSGGTAEGSKE
                     TRPRNVAFNYIVRAA"
     CDS             39344..39964
                     /codon_start=1
                     /product="Tail fiber assembly protein"
                     /label=Tail fiber assembly protein
                     /db_xref="SEED:fig|6666666.356837.peg.52"
                     /translation="MANYSVNVKETTLDKDGHAMMAGWITVFHVDAKTREYRGASYEYL
                     MAGVGIPADSYSDAPELPPEGKALCRAADGLSWMSVPDYRGRVAYDTQTRLSTEITVPG
                     QLPETLTLLAPVSEFDIWNGKKWVTDTDAQHQAYVNSAMQELNERFTTANTRIQALSDA
                     VDMELATEEEKALLGKWKEYRVLLNRVDVNTAPDIVWPETPAV"
     CDS             40051..40686
                     /codon_start=1
                     /product="Phage protein"
                     /label=Phage protein
                     /db_xref="SEED:fig|6666666.356837.peg.53"
                     /translation="MGNVTDNGHYLSPANAVAYLAERLGTAADNLTVCVWMVCGSGLGE
                     FLQALDALTVVFPAPALSQVARQARAMAELATVKMQIPAKNCTFPAAAPLSVASCRQAL
                     NAQRMAAAQQQAAVPMGLNALKGMAERFTSQREAALSEISKTMQQMAQRSALAWVFTGQ
                     GAMGVIAAEMLKNIPQPSAIYTAAMMFTGKELDALESMIREPDNYTRP"
     CDS             40658..41185
                     /codon_start=1
                     /product="Phage protein"
                     /label=Phage protein
                     /db_xref="SEED:fig|6666666.356837.peg.54"
                     /translation="MSQIITLALDGEAIPLRGLTVTPSMQFEEKDQSGQTSSTANAEQG
                     IKPKELRVSGVIPFTEAKVLTRLFALAEAKEGDQLKRYRVANLTAQAINFRLATFTGSI
                     DAPKQDGKQAWLVTFTLREHISVSEKRDARAGNQTETKKQAPGQGSAAGEGGEKLSWFE
                     RKVLKPVNDALG"
     CDS             41189..42841
                     /codon_start=1
                     /product="Hypothetical bacteriophage protein"
                     /label=Hypothetical bacteriophage protein
                     /db_xref="SEED:fig|6666666.356837.peg.55"
                     /translation="MRPITRLMLSGDAVHVVDANVVLELNACGRGFITVETEQDYTGKL
                     VRLDVGYTDLVLRWFTGYVERSQPAENGYQRLFVRELAGVFDRMWPCSFQHPTLRQLAD
                     WLSEHSGLTVQLPDAAYVSKPIPHFTHSGSGHQLLANIGAAFGIDDYVWQPLPDGALYL
                     GSWADSLLAGAPVSIPAEFSQAQAAGNSMTLPLIQSVRPGAVVNQQRLSRVQLLNESMT
                     IEWVPVSTVTGKAAQRSPAQRQIDTAYPELSAGLHLPKFARVEAPSEAVSSGNIADPFR
                     PRYAVDLQLLDADGKPAKDTPVYPAVPLPVPMAGSEAGLFQFPPPGTLVEVGFTGGRPD
                     KPFVRQTVASGQSLPDIKPGEQLQQQRAEVSQRVTVAGDWERKTDQAIRESSMHREVSA
                     DEERRTLVTRETLIKATDSATVLGTHTLQAGAIVQIAQGDYSLATQAGYTASVGQSATV
                     EIGQSLTEKIGQLRRSIAGARQELMAPVVWVGSQQVNVMTLMLDTLDVIQELATQTASH
                     THPNTGTPLNAGEIQQTGRRTGTLKDKYSPIIG"
     CDS             complement(43078..43203)
                     /codon_start=1
                     /product="hypothetical protein"
                     /label=hypothetical protein
                     /db_xref="SEED:fig|6666666.356837.peg.56"
                     /translation="MVIKPRSKKLKNAEIPFTVFSGRSSAKARRRRGLALGFVEK"
     CDS             complement(43387..43890)
                     /codon_start=1
                     /product="hypothetical protein"
                     /label=hypothetical protein
                     /db_xref="SEED:fig|6666666.356837.peg.57"
                     /translation="MALTKCKECKKEVSTSAKVCPHCGVKNPSTTAGQAIGGFVVLVLL
                     VWGAIKIFGGSDDKPTAKADTPKNCAANDGQCLFDKNWIEAASRCRPLIEKSSKYDFEW
                     TDGMMTPMFSHFRLNEAKKQMTFIGDKVKFTNGFNAKITMTYNCSYDLQSKSIVDFGIT
                     EGKL"
     CDS             complement(44478..44960)
                     /codon_start=1
                     /product="tmRNA-binding protein SmpB"
                     /label=tmRNA-binding protein SmpB
                     /db_xref="SEED:fig|6666666.356837.peg.58"
                     /translation="MTKKKAHKPGSATIALNKRARHEYFIEEEIEAGLALQGWEVKSLR
                     AGKANISDSYVLMRDGEAYLFGATFTPLHGASSHVVCDPTRTRKLLLNQRELDSLYGRV
                     NREGYTVVALALYWKNAWCKVKVGVAKGKKEHDKRDDIKEREWKLDKARIMKNAAR"
     CDS             45116..45550
                     /codon_start=1
                     /product="Putative oligoketide cyclase/dehydratase or lipid
                     transport protein YfjG"
                     /label=Putative oligoketide cyclase/dehydratase or lip
                     /db_xref="SEED:fig|6666666.356837.peg.59"
                     /translation="MPKISRSALVPFSAGQMYKLVNDVSSYPAFLPGCTGSRVLSSSGS
                     EMTAAVDVSKAGISKTFTTCNTLIDNQCILMRLVDGPFRQLTGDWRFTPLSDDACKVEL
                     NLDFEFKNALIEMAFGKIFKELANNMVQAFTLRAKEVYCA"
     CDS             45543..45836
                     /codon_start=1
                     /product="UPF0125 protein yfjF"
                     /label=UPF0125 protein yfjF
                     /db_xref="SEED:fig|6666666.356837.peg.60"
                     /translation="MPEIRVEVVYALPERQYLRPLTLEAGSTAEQAIQASGLLALRPDI
                     DLGVNKIGIFSRPAKLTDVLSDGDRVEIYRPLLADPKELRRQRAERSKNKAR"
     CDS             complement(45895..46239)
                     /codon_start=1
                     /product="Outer membrane lipoprotein SmpA, a component of 
                     the essential YaeT outer-membrane protein assembly complex"
                     /label=Outer membrane lipoprotein SmpA, a component of
                     /db_xref="SEED:fig|6666666.356837.peg.61"
                     /translation="MRCKTLTVVAAVVVVMLTAGCSTLGRVVYRPDINQGNYLAPADVA
                     KIHNGMTKQQVIYTLGTPMMQDPFGSDTWYYVFRQQPGHEAVKQQTLTLTFNSQGVLAN
                     VDNKPTLQTQ"
     CDS             complement(46351..48012)
                     /codon_start=1
                     /product="DNA repair protein RecN"
                     /label=DNA repair protein RecN
                     /db_xref="SEED:fig|6666666.356837.peg.62"
                     /db_xref="GO:0005524"
                     /db_xref="GO:0005694"
                     /db_xref="GO:0051276"
                     /translation="MLAQLTISNFAIVRELEIDFQAGMSVITGETGAGKSIAIDALGLC
                     LGNRSDANMVRPGTGRADICARFSLADTPAALRWLEHNQLDDNNECLLRRVISADGRSR
                     AFINGTAVPLSQLRELGQHLIQLHGQHAHQLLLKPEHQRHLLDAYADESQLLSAMRQIW
                     QQWHQSCRELAQHQQATIEREARRELLQYQLKELNEFAPLAGEYEQIDVEYKRLANSGQ
                     LMSLSQQTLQILSENEDQNLLGMLHSARHQLSELVSMDEKLSSVFSMLEEAGIQISEAS
                     DELRHYCDSMELDPIRLYELEQRLSRQLTLARKHHVTPEALPTFYQQLLQEQHLLEQQE
                     SDHETLNRTVQEFHQQALHVAEQLHARRCQHASELAELITTNMHELAMPHGHFTIDVTF
                     TPDSLTANGADHIEFCVTTNPGQPHQPLIKVASGGELSRIALIIQVITARKMDTPALIF
                     DEVDVGISGPTAAIVGKMLRQLGQSTQVMCVTHLPQVAGCGHHHYFVSKHTDGAATETL
                     MQPLGKRERLQELARLLGGSAVTKNTLANARELLAA"
     CDS             complement(48096..48974)
                     /codon_start=1
                     /product="NAD kinase (EC 2.7.1.23)"
                     /EC_number="2.7.1.23"
                     /label=NAD kinase
                     /db_xref="SEED:fig|6666666.356837.peg.63"
                     /db_xref="GO:0003951"
                     /translation="MNRSFNCIGIVGHPRHPNALTTHEMLYHWLRAQGYHVVIEQQIAR
                     ELQLTDAATGSLSEIGQQADLAVVVGGDGNMLGAARVLSRYDINVIGINRGNLGFLTDL
                     DPDHTQQQLSEVLAGRYIREQRFMLEAQVCRANHPNSSSTAINEVVLHPGKVAHMIEFE
                     VYIDDKFAFSQRSDGLIISTPTGSTAYSLSGGGPILTPSLDAIALVPMFPHTLSARPLV
                     INSSSAIRLKFSHITQDLEISCDSQISLPVQEGEEVLIQRSQYHLNLIHPENYSYFNTL
                     SSKLGWSKKLF"
     CDS             49120..49734
                     /codon_start=1
                     /product="Heat shock protein GrpE"
                     /label=Heat shock protein GrpE
                     /db_xref="SEED:fig|6666666.356837.peg.64"
                     /db_xref="GO:0000774"
                     /db_xref="GO:0006457"
                     /db_xref="GO:0042803"
                     /db_xref="GO:0051087"
                     /translation="MNAKNAENFMSSKEQKSPDEQVLDQKEAAEGQQADAVPETTAVAD
                     PRDERIAELEAQLNDAQQRERESALRARAEMENVRRRAELDVEKAHKFALEKFAGEILP
                     VIDNLERALEMADKSNDALSGMIEGVELTLKAMLSAVNKFGIEVVADVNVSFNPEIHQA
                     MTLLESADHAPNHVMMVMQKGYTLNGRLLRPAMVAVSKAKE"
     CDS             49898..50011
                     /codon_start=1
                     /product="hypothetical protein"
                     /label=hypothetical protein
                     /db_xref="SEED:fig|6666666.356837.peg.65"
                     /translation="MEGIYSCDGIYSRNAVPVVFCLYFVNLYVLKRVSFVG"
     CDS             50184..51419
                     /codon_start=1
                     /product="Manganese transport protein MntH"
                     /label=Manganese transport protein MntH
                     /db_xref="SEED:fig|6666666.356837.peg.66"
                     /db_xref="GO:0005215"
                     /db_xref="GO:0006810"
                     /db_xref="GO:0016020"
                     /translation="MPGSRVVESVSRTSRKLKLSLMGPAFIAAIGYIDPGNFATNIQSG
                     AAYGYQLLWVVVWANLMAMLIQLLSAKLGIATGKNLAEHIRDRLPKPAVWAYWVQAEII
                     AMATDLAEFIGAAIGFKLLLGVSLLEGAILTGIATFLILMLQQRGQKPLEMVIGGLLLF
                     VAAAYIVELIFSSPELASLAKGMAVPSLPNSDAVLLAAGVLGATIMPHVIYLHSSLTQQ
                     QSNITRAERYSATKVDVAVAMTIAGFVNLAMMATAAAAFHFSGNTSIAELDQAYLTLKP
                     LLGQAAATIFGLSLVVAGLSSTVVGTLAGQVVMQGFVRFHIPLWVRRVVTMLPSFIVIL
                     SGMNPTRVLVLSQVLLSFGIALALIPLLVFTGDRELMGGLVNSRRVQNIGKVIVCMVIA
                     LNLYLVLDTLLG"
     CDS             51575..52162
                     /codon_start=1
                     /product="GDP-mannose pyrophosphatase YffH"
                     /label=GDP-mannose pyrophosphatase YffH
                     /db_xref="SEED:fig|6666666.356837.peg.67"
                     /translation="MMSSPITILDKQLLSDHWFVLHKYVFDLKRKNGGIVRQMREVYDR
                     GNGAAILLYNRVRGTVVLTRQFRMPTYLNGNESGMLLEACAGLLDDQSPEQCIRNEAIE
                     ETGYQIGEVEKLFEAYMSPGGVTELVHFFAAEYDDSQRKTNGGGVDDEDIEVLELPFND
                     ALAMIKDGRIRDGKTIMLLQHAQINGWFANMR"
     CDS             52436..54715
                     /codon_start=1
                     /product="NADP-dependent malic enzyme (EC 1.1.1.40)"
                     /EC_number="1.1.1.40"
                     /label=NADP-dependent malic enzyme
                     /db_xref="SEED:fig|6666666.356837.peg.68"
                     /db_xref="GO:0004473"
                     /translation="MDEQLKQSALDFHQYPVPGKIQVSPTKPLATQRDLALAYSPGVAA
                     PCLEIAEDPLAAYKYTARGNLVAVISNGTAVLGLGNIGALAGKPVMEGKGVLFKKFSGV
                     DVFDIEVDEQDPDKLIDVIAALEPTFGGINLEDIKAPECFYIEQKLRERMKIPVFHDDQ
                     HGTAIICTAAVLNGLRVVEKQISDVRLVVSGAGAASIACLNLLVALGLKHENIVVCDSR
                     GVIYKGREANMAETKAAYAIDDNGSRSLADAIPNADIFLGCSGPGVLTQDMVKTMAPRP
                     LIMALANPEPEILPPLVKAVRPDAIVCTGRSDYPNQVNNVLCFPFIFRGALDVGATTIN
                     EEMKLACVHAIADLALAEQSEVVASAYGDQDLSFGPEYLIPKPFDPRLIIKIAPAVAKA
                     AMASGVATRPIENFDDYIEKLTQFVYKTNLFMKPVFSQARTQPKRVVLAEGEDPRVLHA
                     TQELVSLGLAFPVLIGRPGVIEKRIQKLGLQIAIGKDFEVVNNESDPRFKAYWTEYFEM
                     MKRRGVSQEQAQRDMRGNPTLIGSIMVHRGEADAMICGTVGNYEEHFSVVEKVFGYRDG
                     VHVAGAMNALLLPSGNTFIADTYVNPDPTSEQLAEITLMAASTVRRFGIEPKVALLSHS
                     SFGTSDSPTAKKMRATLERVNKLAPELQIDGEMHGDAALVEAIRREQMPNSPLKGAANI
                     LIMPNMEAARISYNLLRVSSSEGVTVGPVLMGVAKPVHILTPIASVRRIVNMVALAVVE
                     AQTELL"
     CDS             complement(54773..55222)
                     /codon_start=1
                     /product="probable P23 protein"
                     /label=probable P23 protein
                     /db_xref="SEED:fig|6666666.356837.peg.69"
                     /translation="MTAIWVDADACPNVIKDVLYRAADRTATRLTLVANQPLKTPPSPH
                     IHSLRVAAGFDVADNEIVRRVQPGDLVITADIPLAAEVLEKQAVALNPRGERYTPDTIR
                     ERLTMRDFMDTLRASGVQTGGPAALNQRDRQQFANELEKWLRQQA"
     CDS             complement(55219..56157)
                     /codon_start=1
                     /product="Coproporphyrinogen III oxidase, aerobic (EC 
                     1.3.3.3)"
                     /EC_number="1.3.3.3"
                     /label=Coproporphyrinogen III oxidase, aerobic
                     /db_xref="SEED:fig|6666666.356837.peg.70"
                     /db_xref="GO:0004109"
                     /translation="MSSPDINAIKHFLLTLQDNLCRQFELTDGTATFIEDAWQHASGGG
                     GRSRVLRQGQVFEQAGVNFSHVSGTSLPPSASTHRPELAGRSFQAMGVSLVVHPLNPYV
                     PTSHANIRFFIAEKPGEPAVWWFGGGFDLTPYYGFEEDAVHWHQTAFDLCKPFGDDVYP
                     RYKQWCDDYFVLKHRNEARGVGGLFFDDLNTPDFDASFAFMRAVGEGFRHAYLPIVNRR
                     KDIPWGERERQFQLYRRGRYVEFNLVWDRGTLFGLQSGGRTESILMSLPPLVRWEYQYQ
                     PEPDSPEAALYRDFLPARDWLGLNTPSGARG"
ORIGIN
        1 tatggatgca ttagccagag caatcataaa tctcggtagt tcgctgaggg gaagggctgg
       61 catattctgc tttttaggct tactgaaacg ctgtccaagg ttatccgctg ggttgaactc
      121 tatgagttct tctgttgcgg catagcggaa aatttcattc aggcgggaaa tgatacgacg
      181 tagggtttct agtacgcccc gttgttcaat ggggtcaagg tgttgtttta agagcttagg
      241 tcggatcttt ttgataggaa aattgcctaa accggggaag atatttcgtt cgaggcttcg
      301 ccagatgtct tctgcatgat cttgtgagat accagaggat taaccttttc atctaaccac
      361 ttcttcgcga cagcctttag cgtgtgctct gtagcgtcct taagagcatt ggctttatcg
      421 ttgttgtgag tctgcggatc gataccgttt gcgagcaatg acaaatattc atcacgtaaa
      481 gttcgtgcct tggcaagggt aagatgagga taagttccta aactcatctt agttcgcttt
      541 ttagttactg gtaccgcata cctgaaatac cagtttttct tgccacctac agagagagga
      601 gcgatccgta gcatcaggcc gtcgccatca aaaaggttga tctccttttc tgctggcttg
      661 gtatttttga tttcggtgtc agtaagtttc ttagcgatct ttgccatttt aggaccctcg
      721 agctggggga atctgaattt tcaacgtaat attatgatat taattatata aatatgaatt
      781 catactttgc gtgtatacct aaacgtatac caatgctgaa aagtgatggg ccttcttatc
      841 tgcggtgcgc cttgtctggc aacgcctttt catcacctta ttccgcgcta ttttttataa
      901 gtacacgcga atatcacttt ttagtggttt tcgtgtgtac ttgactgggt gaaattgttc
      961 aagtatacgt gaataacaca attatgtggt tttcatgtgg acttatgaat ggacagaatc
     1021 acggctattg aacgtttaaa cgcattcgat aagcaagggc gctatgtttt cacttcccgc
     1081 gatttagcca aaatttttca tgaagatcgc cccagagcgt ttaatgctgg gctaactcgg
     1141 ctggtgaaag atggcattct gacccgtgcg attcgagggg tgtacgtcta taaccatgcc
     1201 aaaagcaaag acgcctatac gcttgagcgc atcgtgttag cgctgcgacg tggcgagtat
     1261 aactatctca gccttgaatc agctttgtct gagtatggcg tcatttctca aatcccgatt
     1321 ggccggatca cggtaatgac aaccggacgt tcagaagaac ataaaacgcc tttcggtgtg
     1381 atcgaattta cccataccaa gcggccacct gagcagattt tgcaggatac ctatttgggt
     1441 aattccccat tgcggcaagc aacgaaacaa accgcggtga gggatttacg ccgcgtcgga
     1501 cgtaacaccc atctgatcga cgaatcggag ctataccatg aatcagaaag ttaactttgc
     1561 cgagctggtc agcaaagcga tggaatcagc cgagcttgaa ggtcttcgta acgtggtgga
     1621 aaaggagctt ttgcactatg acattcttta ctgtctggat agtgcgggtc tgctggagca
     1681 gcttactttt cagggcggga catcgttaag gctgtgtcat ggcggaaatc ggttcagcga
     1741 ggatttggat tttgccgggg ggatcgcatt ttccggtgca gacctgaaga acatgaaagc
     1801 ctgtattgaa gattatctgg ggaatcggta cggccttgag gtcaacgtga aagagccaaa
     1861 tgagctacgg aatgaacccg gctatgagga agtacgtatc gacaaatggc aggtatccgt
     1921 gaccactgca ccggaaaaac gtgatatgcc aaagcagcga gtcaagattg agatcgccaa
     1981 tattcccgct tatacaagaa tgccgatggc gttaaaacgt aactatgatg ttttaccgga
     2041 tggttactcc gatacattgg ttatgtgtga aacactgaat gaagtgatgt gcgacaaact
     2101 ggtttctctc gtcgcaacca caaaatatat ccgctaccgt gacgtttggg acttaccgtg
     2161 gttaatccag cagaacgcaa cctatgatct cgacctgatc cgaaagaaaa tacaggacta
     2221 ccgaatcccc aattatgatg agctattggc acatcggata cagagcattg agcagattgt
     2281 cggggatggc cgctttagtg cagaaatgcg gcgattcctg ccacaagcgg tatttgacag
     2341 aacactgggg cgtgaggcat ttagccaata tttgagtggc gagttaaaaa cactcttgag
     2401 cacgttacag caggagctaa atgggcaggg agggaaagcg cctttcatca tgtgaacatc
     2461 cacgcccaaa taaaaagatt cttcgaaaaa ctgttcaccc tcttcactgg agagttttat
     2521 tattaataat caatgtatta atggatgatg agtcactcag aaagtgacag gtgactcatc
     2581 attcttttct gataagctaa gagggataaa gactgagact attagtgaga acaataatga
     2641 gtggtatagt actaagatag tagaaatttt taacgtccct gttaaatgaa ttatcaatcc
     2701 tcccagtggg cttcaatgaa ctgtatttct ttattaactc taatctcttg cttctcttta
     2761 tttcctgaaa agaagaattc tttccctgac gtaagatcaa gcactgagta ttcaaaacct
     2821 tgatcgccaa ttgctctttc cattaaaaaa caaatgaaat tagctctctc ttgagtcatt
     2881 ttctcactat tgctaaaatg taattttact aactttgacc tcccttgaaa gtttacattt
     2941 aattcagggt tgcatgatat atctgttttt gcatagtgat agtatctttt gggagcgggg
     3001 aatccggtaa tgttttttcc tgattgccac tcattgaata cgttaactat tttttcaaag
     3061 tatatctttt ttgaggaatt tttttctttt ctgcataaat catagagctc tgatatatgc
     3121 ccttttttca ctattaatct ttttattgca tctcttattt tcttataaaa atccttgcct
     3181 ggatgatatt ctggcctgtt tgctatggat tttattttgt tgatctttgt ttggggtgag
     3241 gtattaacag caattgatga aaactcagca acgcctagtg atggcatagt attctccata
     3301 ttgtcattgt tatgagagaa aatatcattg gttaataatt tgggcaataa tttgttaagg
     3361 aatgttcttt aaattaattt gtgattattt caataatatt taatattcaa ctaatatatc
     3421 aatcatgaga taatttttac ttataaaaat gtaaattaat tatattctaa atgttttgtg
     3481 aaaaaggatt tgtggcaaaa ccggccgaag caggtttgcc actgttgatg aggtatcagg
     3541 ccctgtcaca tttgggcagc cagtcggcgt ctgactcgcc tttcagttca aggttggttt
     3601 gtatgccctg cttggttctg cctttgaggt agaccagacc gtattccgac atgatgttag
     3661 gtagcacttt gccaaaagcc gtcaggctta tgggcttttg atggccgtgc gactccataa
     3721 atgacagata ggcgtggtac aggtatttac ggggattacg gggcgtgatg ttggcgtttc
     3781 ccatatacag cccggtggtg ccactgtgtg cctgcaggta gccgcaaaaa tcaaccaatg
     3841 gatcggcctg acgtttgatt tccagcgctt cggcggaatg ttgttgtgcc tgtagcaatg
     3901 tccgggcgtt gttggggtcg gcaaagcgct tcatcaggtg acgcacaatt acggccaatt
     3961 ctgcccgaat tttctctttc agcttagggt cgcgttcgct ggccggaatg ggctcgctga
     4021 aatgaataat cacccggcga cgagacacgc cgccgctgcg gtcgctaaag cgcatcgggg
     4081 tgttgttgac ggccagaatc accgccggaa ttcgggtgga ataggcgtca cggtatttcg
     4141 ggtcaaccat caccgcatcg ccgccggtaa tggccttgat accggcaccg tcaccgctcc
     4201 atttctcttg atcaggcagt acgatgaatg agaaaccaat cagtgacgcg cgctcacggg
     4261 aagattcaat ggtgttgatg gtcgccgccg tggtgttgtc ctcgccggac agcatagtag
     4321 caatctcggc cagaatactt ttcccgctgc cgccggggcc ggtgacttca aggaacagtt
     4381 gccagtcata gcagtttgcc agcaccataa acagcgcggc cagaatacgt gcctgtttat
     4441 cttcgttgtg tcctgccgca cgggtcagcc agcgccagaa gtgcggagca ttgtcggcaa
     4501 ggttttctcc tgccttaagc ggcgtgtagt ccacgtcatt aacggtatgc aacccgttct
     4561 cccggcggtg cggcttaaac tccccgctga cagtatcaaa cacgccgtta cgaaagccga
     4621 ttaaccggcg ctggggcttg gcctgcatgg ggataatcag tttcagggtg tctaacacgc
     4681 tgccaatgct ggacgcggta aagggagcct gtatcttctg aaacagcacg gcgatatccc
     4741 ggcttaacaa gcggtagggt aaggctttcc atgcaccgtt ttgatactgg aagaaggttt
     4801 ccccaaaagc atcaatagcc agcgtgttgc ggtaatggtc gcgtatcttc tccgctttct
     4861 cactggcgct catggccttg aattcggcct cgcccagcga ctcaaacggg ctggcctttt
     4921 ccggctggat aaactcagtc aggtagtgcc gggtgacgtc tgcgccttca cggcggtaca
     4981 catcgttcca gtcaccaaat atcggcggca gagcgacacg tccatgtaca gcagaagcgg
     5041 cctgaccggc tttggactgg ccggtgccgt tctcatcccg gtcagcggcg atcagcaagg
     5101 tcgccgccgg gtggcgtgtt ttcagttcac gggcaaggga tgacagattg ttagcgctga
     5161 gcgcgacata cacggtatca ccggttagct ggtacagcgt taacccagtg gcatagccct
     5221 cagccagcca gataacggtg gtgtgtttgc cactgaaaca gtaaaacgtg cctttaacct
     5281 gtccgccttt tagcgtgcgt ttgtctccct gtgcattaat caactggatg ttcaccacct
     5341 cgccatcgtg cgtagtcagt ggtaccagta catcaccgga ctgatagact atgccgccca
     5401 tgcgcagcgg tttgccctgt agagtgagta cctccacgtc tggccagcct ttggcgctca
     5461 ggtaggcatt accggactgt gtaaccgttt ctttgatttt ggcctgtgcc tgaaccgccg
     5521 cccgttgccg ggcagcgtcg ttatcatcgt cgtcggaagt tgatgctgcc gggctatccg
     5581 gcagcgtacc cagcaacgcg ctcactttca gggcggcgtc ggttggcgtc aggttcaggg
     5641 ctttctcaac cagattcagt ccgtcacccg cgccacactg gttacagaac catgtgccgc
     5701 gctcctcttt gttatcgaag cggaagcggt ccttgccacc gcataccggg caggcgctat
     5761 gccgcccggc tgcgtcaacg gaaatcccca gcagggggag gagttgcggc cagtggccgc
     5821 tggcgcgttt cacggcctgt gtcacggtag gttgtgccat gtgttgccct tcagtgcagt
     5881 gtggagtcgg tctggccggg gtcgttcagg ttatcgatag catcgggcat atccagcgtg
     5941 gccgagagca cttctaagcg ttctgccagc acaaacagca gcacttcttt tgccatcggg
     6001 ttatccagct caatcacggc ataggtcagg gcgcggcact ggtcggtaat ttcttccgcg
     6061 gtcaggggcg tgacatcaaa catggcgggc accccgcagc ggcaggcggc cagcaaacga
     6121 caacacgtag tcacgtgcca gcaaacggcg ggcgctgatt tcatccgggg cgataaccgc
     6181 ttcacggtgc ggtaaggcgc gtaattccgc gcggcgcacg gccagaaaca gaaaggtaaa
     6241 ttgcgggtgt gacggggttg gggtcgtagc catgtggcag tctccgttga gtagctaaaa
     6301 ctgctaccac cagaaacgcc aatttcaagg gtggtagccc agacggggtt ggcgtaaccg
     6361 gcctcaacga acaccggcca gcccgaaggc tgccccgcct gagccaccat aatttggatg
     6421 cagtggcggc ataaagtgtg ccgcacattg tgcaggtgtg ctaaggctgc gacgtaaaaa
     6481 aagacgcatg gcgcgtctgg tgtcgccgtt gagttgttca ggacgccaat cccggctatc
     6541 gattttgcga cagcgacgga actatagcgc caaaaagccc cggcaggcaa gccggggaaa
     6601 gggataaatt gcacgctcat agcagcctca gcagttggtc agcgcatcac cggcacggga
     6661 tgtgcagtaa tgccggggtg aatcagaggc tgcggccagc agttgatcgc acaggctgag
     6721 ggtttcccgt tcatcgagtg tggtcgactg accggcgata gctaaggtga tcatgcgtga
     6781 ttctcctgtt gacgggcggc gatacgttca gccacccaat gatgaatttc ggactcaacc
     6841 catgcaacgt tcttcccacc caaaggaaca cgggcgggaa atgcattgcg gctgctcagt
     6901 tcgtacagcg tcgagcggga aataccggtg acgtgcagca cttccggcag gcgcattaag
     6961 cgctctctgg ctggagcctg tggcatcgga ggcactgcgg gaaggggggc ttggggtgtg
     7021 gctgacaaca ttgggcgcta cctcgttaat gtccgcccgg ctctggccgg atggcgctgg
     7081 atttatctgg tagctcgcta ttatgtgaat atttgcagtg gtggcaacaa ggggaaaaaa
     7141 ggagattgat ggacaaaaag cggtcgggaa ctaccgtcaa ttctcaacgt tgcccaatat
     7201 ttgccaatat aagtcaattt tacacattcg ataaaaatca aattattggt ggctatttat
     7261 atggcctgaa ttgatagtaa aaaacatctg aaaaccgctc gccagaaaaa agcgccaaca
     7321 attcaggtgg acagtatgaa caccgggtga tgagtgttat atccactctt catcccttta
     7381 tctattgatt tatctgtttt ttctctcagg tgaagagtag tgaacagttt tataaaagtg
     7441 tggcggttga tagagggagg caacctgtca taaacacgct cttgtgtggg aatgggcaca
     7501 atcggcccag atagcggcgt tgtgtggtga attgcaccat agctgccaga tgataaccca
     7561 tacggagaac gactatgagc cagacaacgc cacaaagtga tatcccagat gttttgaaaa
     7621 aaatggctga caactatctg aaggcgcgag aagctcacct cgctaacgcc agtgaactgg
     7681 ataacatcat gacggcgatg aggcgagcca aagcgcagca gaccgctacc gaagcagaaa
     7741 atcagctttc tgataccgaa tggcgcgccc gttttctcaa agcgcgtggg gaaatgacgg
     7801 aggaactgaa agccctgcag ttacagcgtc tggcacagcg cgaactggcg cacgagtatg
     7861 atgggttgct ggcgcagttg gaaatcgacc agctccggca gcaggcaacg tgccatgcat
     7921 cggccaaagc gtgctgtaat gcacatgcca gcgcgctgcg tgattacgcc gagtgggaat
     7981 taagccaggc gttagaccgt atcagtacag cgctgattcg ggccatcaag ttaaagcagc
     8041 acatgctggg tatcaccacg tctgaattta ccgaaggact ttcctatcaa aaacccgata
     8101 aagtggtcat ggaacaggtg gtcaactgcc tgatagccaa gtcgaataat tatcgctttg
     8161 aaatggataa cgagccagtc ttgtccgtgc tggggcttga ttcaccttcg ttgccacatg
     8221 cagattttcc ccccgtggca aatccgatcg cccgccatcg tgcgggcttt tttttgaggc
     8281 ttttcctctg gctagcgctt ttttgatcgt gcatgtatac agtgcatgaa tttgcatgtg
     8341 aaacttacct ctcaattagc cctgtcgcgc cagtattggc acggcctgag cgacttcatg
     8401 caactgcatg aaaactgcta cataaagtgg gtaggcgtgg cgggggcaca attgcgcgcg
     8461 gggagttttt cagtgtatgg ctgtgactgg tatcattttt atattcaaat gaactatagg
     8521 taaattagta taaatgatat tttatgattt tcatcggata ttaataaaaa cgttatatac
     8581 tcatcatact tcaagttgca tgtacgttgg ctacgttcag tcacccgaat catttacctg
     8641 attaagctcg tcgtgatcac cttcacttgc taccttcttg caactcgaat tatttaggat
     8701 atatatagtt attagactac acattagtta gctcaatgag gaaaaatatg aaaatatctt
     8761 tttttggtgt aaacaacttt agagctattt caggtggcat tgataataac aaaataatat
     8821 ttaaagatac caatactctc tttgtttatg gggcaaataa tgtcggaaag tcaacttttt
     8881 taaaggcata tctatttttt tatagtaatg aaaaacctat aattgatgat ttctttagac
     8941 gagatgataa aaactccatt gagtttgagt tagaggttaa actagacgac ttagataaag
     9001 aaagaataga agataaagca ccaaaacaaa aagagagtta taaaagatat ttaaataatg
     9061 attatataag aattaagaag gtatggagta aaaatggagc taaaatagaa gataaaaact
     9121 atacctttga ttatagtaaa ggtgaaggtg gtgagtatga tgaagttgga tatgcaacga
     9181 ttggtttgca tcaagtattt caatcatgct taccaaaacc tgtttttata aaagcaatgc
     9241 caacagaaga agaagcgaaa aaaatactga atgaaattct aaagatgatg gctgaaagta
     9301 cacttaaaaa atccgagctt gaggaattga aagtagccca agataaaata aaagaactgc
     9361 aagataaaat gtatgattct gacctgattg aaacctatca aaattcagtg aatggatatt
     9421 ttaataagat attttttgat acgacgatat gttttaaaga ccagaaagat agggttgttt
     9481 ggacggaaaa taagcttgga agagattttg aaattgagtt catgaagaga aatagtgatg
     9541 gagaatatga tggaagcatt ccttcctcat atagcagtgt aggacatggg gcaatcagaa
     9601 cagcaatatt tacattgctg ttaatgagag atgtagctga acggttcgaa agaaggcaag
     9661 gtcgtaaaga ttacatggtt ctatttgagg aacctgagtt gtttctgtac cctaggatga
     9721 tcaaagaact gcgtgaacta atatatcagg tgagtgttga agatcttcct tatcaggtgc
     9781 tttgtgcatc gcactcatct tcgatgatag atctttctaa accgaaatca tcaataatac
     9841 gattggtaaa aaactctaac ggcactaaat catatcaaat taatgaccag tttttgaagg
     9901 aagcaaaggg catagctaca aatgacgaac tcaagcaaga aatgtatgaa gttttaagat
     9961 ttaatccata tatatgcgaa tctttttatg ctgatgaagt tcttttgatt gagggtccaa
    10021 ctgaagagat aatatctaga gctttctttc aagagtttcc gccaaaaaaa actatatttg
    10081 tattaaactg tggcactgtt aataatatcc cattctatca gaaaatattt tcacgtttta
    10141 atataaaata tcatgtcatt tgtgatacag ataaagcgaa aatagttgaa tatgatcagg
    10201 ctggtaatcc tagttttgat tctggaatac agaaaacaat ctctgatcaa tataggtctg
    10261 attatgatgt aacgaatgga aatatagggt tacttcgagt tcataatgta acatttgaac
    10321 cagcacatca aaatgtagat attccagaaa tactacggtt tgctgatttt ggtgatagaa
    10381 gtaaaccatt taatgcgaac ttgtattgga aaaatgtact aaaaccaaac attgcccatc
    10441 aagatataaa taaagttcct attatacggt atttaaaaga gataatggcc cattaatgta
    10501 aaaaggctga gcgatatatg ctcagccctt ctatttatgc acacctaaac cccaccaatc
    10561 catcaactct ttcctctgtt caaggtaggt agagcgatta taagcccgtc taacctcatt
    10621 cttatcacaa tgcgctaacg ccgattcaat cacatcagga ttaaaaccgg cttcattcat
    10681 ggcggtgctg gctattgagc gtaaaccatg agcaaccagt tttccaccgt agccgatgcg
    10741 ttttagtgct gcgttggcgg tctggctgtt catcggcttt ttaggatcgt tacggctggg
    10801 gaaaacataa tcccggttgc cgctgatagg gcgcatgatg tcgagcagtt ccagcgcctg
    10861 ttcgctgagc ggcacaatat gatcgcgttt ggctttcatt ctttcagccg ggatgctcca
    10921 cgtctttttc tcgatatcga tctcagccca tgctgtggcg gaggcttcag ccgggcggat
    10981 aagtgtcagt aattgccatt ccagcaagca gcgggtagga atggagagat tagacatcgc
    11041 aatggtgcgc atcagcgcgg gtagctcttc tggccggatg gtcggcatat gctgtttttt
    11101 agggcgctcg aaggccatac caataccaga ggcggggtta gcgtcaatca gcccggtgtt
    11161 aaccgcgtaa accatgattt cgttgatgcg ttgtactaac cgcctgacgg tttccagtgc
    11221 gccacgggct ttaatcggct ccagcgcttg tatcagtgtg cgggctttga tttgctgcac
    11281 ggggatattt tcaatcgccg ggagcacgtc tttttccagt gatcgccaaa tgtctttggc
    11341 gtggtcggtg ctgactgtag cctgtttcag cgtgaaccag ctacgcgcca cattgatgaa
    11401 aaggctttct acggcgattt gcgcttcttc gacttcctta gccacctttt cctgtggatc
    11461 tattcccttg gctaacaacg acagtttttc gtctctcatg gcgcggacat cggctaatga
    11521 caatgccggg taagcaccaa acccaatcat ggtacgttgg cctgtggttg gtttctggta
    11581 acggaaccgc cacagttttt tcccggtggt tttgactaag agaaatagcc cgttgccgtc
    11641 atgcagcgtt aggtctttat ctgccgcttt ggctttttgc acttcgatgt gggtaagggg
    11701 gcgagttgtc cgtgccattg ggagatatcc ttaatgattg gtatacgctt tttggtatat
    11761 atcgtaccgt ataccaattc gtataccaat catcagcgga tttagccgga tatcgtcgga
    11821 taatgatgga aacaaaaaag cccgcaaacc taggtgggat gcgggcttta aggactttct
    11881 cggacgtatc cggatatgta agtggtggag ctggggggag ttgaaccccc gtccgaaatt
    11941 cctacattcc ttctggtagg tagtaaaaac aacaaattac aataaaaaca aaatgttatt
    12001 ttgtgatgag tggtgaggaa aaggcttgat tgccattcgc tgccgccaac ttgccgccat
    12061 tttttggcga ccagttcagg ccgttgagtg ggtttttagt gatggcgtct tccagatggt
    12121 cgggcgcaaa gtgggcgtag atcatggtca ttttgatgtc agcatggccg aggatatcac
    12181 gcagcaccag tatattgccg ccgttcatca tgaaatggct ggcgaaagtg tggcgcagta
    12241 cgtgggtaca ttgcccgtca ggaagctgaa ttcccgtccg gttaatggcg cgctcaaagg
    12301 tttttcggca gggagaaaac agcttgccgc ttttacgtgg gatctcatca tacagttcac
    12361 ggctgatggg aacggttcgg tttttcttgc ccttggtgcg ggtgtaggtg atgcgataag
    12421 gcgtgacttg ctggcctgat agcccttccg cttcgctcca gcgcgcgccc gttgccagac
    12481 atattttggt aactagcaac agatgagggt tagcagattc ggcgcacgca tccagtacgc
    12541 gctttatctc attgggagcc agaaacgcca gttcctgttg cgctatcttg aatgttggca
    12601 agccggataa cgggttgggt gcgtcccagt ggcccagttt tttcagtgtg ccaaatacgg
    12661 cggataagtt gcgctgttcc agattgactg tgcgcggttt gacgacagac agagggatgc
    12721 cgcttgcgtc agtcatctgc ccggctaacc gcagttcgcg gtaatgcgcg aaatcggcgg
    12781 cgctcagttc tctggctttg gggttgccta aaccggtgca gatgatatca agtttcgcca
    12841 tcatcctttt agggtcggcc agtgtgcggc cgtaaagaga aaaccacaga tcgataatct
    12901 cccgcaggct gcggttatct gctttttcac caagccaggg cttgttttca ctctcttcca
    12961 tcgtgaagcg ctcaaatgct aacgcctcac ctttggtagc aaactgcttg cgtacccgct
    13021 tgccttcacg cccgaatggg tagcactcac acaaccattt ccctgatgcc aatttacgaa
    13081 cagccataca cccccctgta aactgagggt ggcatattta ctgtgtataa aaacagtaat
    13141 caatgtatgg atgttgtgag agcaaacaaa tggcgaaagg tggccaaggc cacctttaga
    13201 ggtaacggta agactgagga gcggtgatgt tttcacctaa tgcactgagt tgcagcggcg
    13261 tttcaggtag aactgtcatt ttttataatc ctttataaaa acctttgcat tcggcaataa
    13321 tttgaatatc acccagccca caatcaaact ccgccccagc cccgctaacg cgcactttcc
    13381 ctactggtat acgggtcaga tctctgatgc tggttcggcc ttcaatttca accagccact
    13441 taccatcaac aacctcgtca aactggcgat cggcaatgta ggttatgtct ccatccagaa
    13501 tgacaaccgg gtctttcagt ccatcggaca gaaaagcctt atcaaacata tagtagtttg
    13561 aatcgtagag ttttccatcg atcagctttt gccttggtat agcgatcacg tcatttcttg
    13621 cgtcatcaaa ctttgggcct tcacctgtag cgagccagcg taaagatacg ccggtttcta
    13681 aagccgcctg aatgacccaa tcagcaggaa aagagtcacg catgtatctg ttagctaaag
    13741 tgctttttga tacaccgaga tggtcacata gagcctgacg attcttaaaa ccatacgcct
    13801 cgacaagacg ctcaatcgct gcctttgcac cagtcccaaa atccataaag ttcaccaaat
    13861 gtatactttt ggtttgacta aaaccaaaag tgatcgtaaa tttcgcttgt acacaaaaag
    13921 tggactgatc acagttcaca acggctcacc acaagccaat agggaatgtt gcattatgag
    13981 acctcaaata tcaatcaccc tggccgtgcc gtctgtctcg attgagaaat acagcgagct
    14041 gaccggcctt tctatcgaca ccatcaacgg catgctggct gatggccgct taactcgtca
    14101 ccgcctgcgc aaagataaaa agcgtgaaaa ggtgatgatc aacattgccg ctatgacggt
    14161 tgatgcactc gcagattgtg atatttcgct caattagttc gatattgaga tttttggagt
    14221 tcacaaacca tgtttgatta ccagatcact aaacagacgc actttgatga agcctgccgg
    14281 gccttttcac ttcgtcacaa cctggcggag ctggcacgca cggcggggat gaatcagcaa
    14341 atcctgcgta acaagctgaa tccggatcaa ccccacaagc tgacctgtga agaactgctg
    14401 acgctgaccg acatcaccga ggatgccacg ctgatcgatg ggcttttagc gcaactgaac
    14461 tgtctgccag cggtgccagt gaatgaggcc agagcagaac ggcttaccgc ctatgtgctg
    14521 caagccactg ccgcagtagg gaaggtagcc gccgaaagcg tatcggatga gcgtatgacg
    14581 cagacacgac gccatagcct aatgagcacc atcagcgacg gggtgcgtta cctgtcgctg
    14641 attggcctga cggtgcagtc tcgcattcag gctaacccgg caatggcgtc aacgctggat
    14701 gctctgagcg ggttaggcgc atcgctgaca atcggataag aacaacacca gggaaaccac
    14761 gcgccgggcg tggtgaaaca tcccggcacc tatttgcaac cgtctgaaaa caggcggtta
    14821 ccaatgggac tgtttggagt ttttatgtca aatcacaacc cggaaatatg gctacaggcc
    14881 gccgatgatg ctgcacagag ttttttatct caacctgctg atgtgcgaga gaacggaagc
    14941 gacaatggtt acaaccggat tagcgttttg tcgtcgatgg agtcattggc tgatgctgtc
    15001 tattacctca atcatcctct gtatcaattt atcaagagcc attcgaatca atggtttcga
    15061 gatggaatga cgcaggcacc ggaattcacc gcaagttgga tgtgtcggca gcaagggtaa
    15121 agcataatca ggagggaata tgtctcaatc tgtcgatcat cagaaatgga tacagcgttg
    15181 ccgggatatc gtgtttaaag gtgaatcccg cgctcagtca ttttgggagc gggctgcgct
    15241 ggatacccgt gaaattatct tgttttctgc aaagccaaag ctgaaatcgc gccatgtcaa
    15301 ttactcatgg catcagttta cggcggaaga gcgggccgct atctggagcg caattaagcg
    15361 catccggtct atttgcgatg ataccgcgct atttggcccg gatgattttc tgaaaaccag
    15421 taatcaaagc ggcaccccga atcagccgaa cccgtcaccc attcattaat taacccatag
    15481 caacgaataa atgcccttta tcgggcaggg attcgtatta cctgaaaaaa ggaaaccgta
    15541 atgattgcaa ccaaattaaa acccatgaat gccgccgctg atggcgcact gatcgagctg
    15601 ctgaataaag ccagattgga ggagcgtaaa gaccagcatt tgtccttctc actgcggctg
    15661 gcggcgctgg ctgtccgcgc tcaacaacgc gacctctccg ccgccgaagt ggtggaactg
    15721 atacgtcagg aatcagaacg ttttgagcac tccgctcagg agttgcactg atggccaaca
    15781 gtatcaggga gaacgtcagt gacgagctgt tgcgagaaat ctgcaacggc tcgccattca
    15841 ccggcgcgtt tgaaaatgag gtcgttgaga tggctcgtga attaattgaa ttcagaaccg
    15901 cagcggccag agacatgcag aaattagccg atctggagcg ggctgttgag gtgttgagcc
    15961 acaaggttgg ttctgtatcg atatcgcggg gtgccttatg agcactatcg ccacaccgct
    16021 gaaatgggtc ggcagcaagg cccgcgtgat ggatatcctg cgcgagcatt taccggccgg
    16081 cgatcgtctg gtggagccgt tcgccgggtc ttgtgcggtc atgatgaata ccgattaccc
    16141 ggaatacctg attgctgata tcaaccctga cctgattaac ctgtatcagg tcatcaaaga
    16201 ggatttgaag gatttcattg ataccgccga aggtctgttt cgcacggcga atacagccga
    16261 aagctattac cgcttccggc aggtatttaa ccgcagcaaa gaaaatcgca tcacctcagc
    16321 ggcactgttt ctttacctga accggcacgg ctaccggggc gtttgtcgct ataaccgcgc
    16381 cggtggattt aacgtcccct acgggaatta cgcatcgcct tatttcccgc tggccgagat
    16441 tcaggcattt gccgaaaaag cccgccgcgc aaaattcatc tgtgctgcgt ttggcgaaac
    16501 attgcaactg atccgcaccg gcgatgtggt gtactgcgac cctccataca tcccgcaaac
    16561 gccaacggcc agcttcacca gttatcacac cgatggtttc acccgtaacg atcagtatga
    16621 cctgtgcagc gcgttattac gcctggctga acgtgggata cctgtcatcg cctccaacag
    16681 cgacacccac cacgcacaca gcatttacca ccggtttgat atctgccgct tcaccgcacc
    16741 gcgtagcgtt ggtgttgcgg caggggagag caaacaggcc ggggaaatca tcgccaagcg
    16801 tctgccggtg cctgtcgcca gcaacatagc gaaggtttgc gacgggtgcg gctatgaagg
    16861 tggtgggcac tgccctgact gtgggccggt gatgggcgat gccacctatc aggaaatggt
    16921 ggcatccggt gcgttggatg cggatccatt ctgatgcagc cattggccta ctacaacgaa
    16981 atcgacccat tcgctgccca atggctgcgc aacttaattg atgccggcca tatcgcgccc
    17041 ggcatcgttg ataccagatc aattgaggat gtcaccccta atgaccttaa aggattcagc
    17101 cagcaccact ttttcgccgg gatcggcgtc tggtcttacg cactgcgtag agcaggatgg
    17161 ccggacggtc aaccagtctg gaccggttca tgcccttgcc aacctttcag cgcggcgggc
    17221 aaaaaaaaga gggtttgccg atgagcggca cttatggccc agcttttacc ggctcatcag
    17281 ccagtgcaaa cctccagtca tttttggaga gcaggttgcg agcaaggata tcgatgtgtg
    17341 gatcgacctt gtacaaattg acgtggagaa aatgggttac gcctttgggt gtgtgccgtt
    17401 tccggctgcg agcctcggtg ctcccaatat cagagagcga gcgtactggg tggcctactc
    17461 caaggacttg caaaaatggg caccgaaagg ggaatccgag cagagcaatc aaaaacaagg
    17521 ggaaattaga ggatgcaata ttcctcatcc tgcgaagtca ggaaatccag ttagctactg
    17581 gagaaattgt gtttgggtgc gtggggctaa cggacgacta ttcccagttg agtccggaac
    17641 actgccgttg gttgatgggg ataccaaaag agtggggcga attagcgcct acggaaacgc
    17701 catcaacgcg gaggcggcaa aagcattcat agaagccgca gctgattata tgtctgcgta
    17761 ctcgctcggg gtctgtgagt gactgattta cagatcccgg agcataacgg cgcgtatcac
    17821 gctgtcaggg aatggcagcg tgagcagttt tcccccggcg agcctgctgg gttgagttat
    17881 gttgagcgca gtctatggca ccttaacccg ctggatcacc aatggcgtca gcagtacctg
    17941 gccggaatgc cggattatct ggcgaagtat ttcggtctgc gttatgaaaa gctgtttaaa
    18001 tccgatgagc acaagggccg ccgccgggcc aatacgtttt tactccgtac cctggggaaa
    18061 agcgtattgc cacgcctgcg caccgttacc gaacgatacc agacgcaaca gcatgcggcg
    18121 ggagatctgc cgttcccgtt ctacgatgat ctggaaaagc tgccggttta tgaccgtgac
    18181 aacatccgtg ccctgtcaca gcagttggcc gactttatgg ccgcatcgtt gcgtgattac
    18241 accgaaaacc gaatcaggaa caccgggaaa ctaacagaca ggcacatcac cctgctgtca
    18301 ttccgtcatc ttggcctgct gaccttacag gcaggaactc agccgcccta ctgggcgcaa
    18361 ttcactaaag gccgccaccc gttatccact gaaaaagctg aatccggctt gctacgcatg
    18421 atgtcaccag agtggtggcg ggcgcgtcta aagcgccgtc gtgatatcca gcgggagcat
    18481 atggctatcg cggtcggcca ggtgcaaaag gcggcgtcgc cgtatgtctc gcgctccacg
    18541 ctggatgaat ggaaagagca gaaacggcgt aaccgagagt ttttcaaggc gtttgaactg
    18601 gaggacgacg agggtaaccg cgtctctctg gacgacaaag ttaacgccag caacgccaac
    18661 ccggcgatcc gccgctgtga gctgatggtg agaatgcgcg gctttgagga tttggcgcag
    18721 gaaatgggct gcgccgggga gttttacacc atcaccgcgc cgtcacggta tcacgctgta
    18781 cacagcggcg gtgggttcgt tgagcagtgg agcggggcca gtccacgcga cacacagaaa
    18841 tacctgtgtg gtgtgtgggc acgcatccgg gcggaactgt cacgcgaaga gattagtgtg
    18901 tttggctttc gggtcgtcga gccgcatcac gacggcacac cacactggca tttattgcta
    18961 ttcatgcgcc cggagcacat cgaacaggtg cgcgacatca tggcgtatca cgcccgccgg
    19021 gaagatgcca atgagctgaa cagcgaaaag gcgcaaaaag cccgcttcca ctatgagccg
    19081 attgacccgg aaaaaggcag cgccacgggt tatatcgcca agtacatcag caagaatatc
    19141 gatggttacg cactggatgg tgaggccgac gaggaaaccg gggaaaacct gcgtgatatg
    19201 gcaaaggcgg tatcggcctg ggcgtcacgc tggcgtatcc ggcagtttca gcaaatcggc
    19261 ggcgcaccag tgacggttta ccgcgagttg cgtcgcctgg gtgataagca actggacaat
    19321 gcggcgatgg atgcggtact ggcggcggca gacgtgggcg actgggcggc atacacacag
    19381 gcacagggcg ggccgttagt ctcgcgtgat gcgttggtgg tgcgcctgtc ctatgaagtg
    19441 accgaacgtg ccaatcaata cgccgaagac gtgcaaaagg ttcagggggt gtattcgcca
    19501 ttattgggag cgccctccgc gatcatcacc cgaacagtgc aatggaagat tgtcccgaaa
    19561 caggccaccg cgtcagcggg ggccggggtt tctggcggct ccgccgccgc ttggagttct
    19621 gtcaataact gtacgccggg ccttcggcga cgattatcgg agttgctgcg cttaaggggt
    19681 tttccacctg atccggggct ggttgatgtg ctgatgcggg gcggccatct ggccatgagt
    19741 gagggcaggg cgctaaaaat ggtcagtggc aggctggagg aagtacgcca gacgggagac
    19801 tgcgagcttt ggctggggtg gaactggggc tgatttgttg accatattgg tgagtagtgt
    19861 ctcacactta tagcaactaa aatggcttac ggagaatagg aaaagatatg attgtaagct
    19921 tatctgatag agatttagtg tgtgattagt gagagctgaa tccttggtaa atcagtgcaa
    19981 caatatcatt gtatttttat gtggaatctt tctacttgtt gctgcgtgat ttttacgtaa
    20041 actacagttc atgccatcta tgtttgagcc aatccttctg aattgttata aacggttttg
    20101 ttctgaattt ttacagcaat aaggatatta gaatgtatca atataaaagt atcaatataa
    20161 atgatttaat gctggatgta caaaattctc gcttcggtga taatgttgat ggacagcgag
    20221 aagcaattaa ggttatggtg gagaatcaag ggcaaaaaat agtcaagtta gcgaaagata
    20281 ttgctgaaaa tggggttgat ccttcagaga gaatgattgt tgttgagagt gatgatgagg
    20341 aaaagggctt tattgttaaa gaggggaata gaagggttac ggcacttaaa ttaattgaaa
    20401 atccctcgtt agtccaaaat aaaactctcg aattaacgtt tgagaaaata aaaaaatcaa
    20461 gaaaaatcag agtcttaaat gttgattgtg ttgtgtatga taatgaagag tataaccatt
    20521 ggataaactt gaaacatacc ggtcaaaatg aaggcgcagg ccgtgtaggt tggactactc
    20581 cagagcaatt aaggtatatg gccagaaatg gtaaagaatc ttttgctaac caactatatt
    20641 ccttcattga tcttttcccc gagcatttcg aaaatattat taaaaataaa agcaaagtaa
    20701 aaataactaa ccttgaccgt ttaattggag atccaagctt taggaaaagc ttaaatctta
    20761 atggtgttga tgggttactt ttttgctccc aacctttaaa tagatttatt agcgagctta
    20821 agaaaatatt agatgtaatg attttgactg atgataatgg tagaccggaa ttcactgtaa
    20881 atcgtattag atcaaaagac gaccgtgcaa attttatttc tgaacttggc ctaacttctt
    20941 tctctcctgc cttagaaaag gaatggcgtc tattagaacc accaaaatca tcatctaaag
    21001 atgatggtag acagaatgag aaaggttcac agaacgatac caatcatgaa aaaaatactg
    21061 ctggcgatgt agatactggt catgaaaaat ctagtgggga gcattctact actggtgatg
    21121 gtgagggaaa aaattctggt ggatcttctg atacagatga taaagcaaag ggtaaaaaag
    21181 gttcaaaccc tgcaggggta aaacgtaatc atatgatccc aatgggagtg tcactaaaat
    21241 ttggtactaa acacaaaaga tgtcatagaa tttttacaga gctaaaaaga atgactcatg
    21301 aagatcatca aaactcgcta gctgtaatgt tacgggtttt tattgagctt tctttaaata
    21361 cctatattga tattaataat cttgtgtatc aagataaaaa aaacccacat aaaaccccag
    21421 ggttgcatga taaagtagtt atggtttcaa gtaatttgtt tgaaaagaaa ataattgatg
    21481 gtcctaagaa gactgccatt caaagttatt ctaagcagat gactagctcc agcgcctcat
    21541 tgcaacaata tgttcataat gcaaatctca ttccagaaaa agaattcgta aatacggaat
    21601 gggacaactt tcagccttta atcgaggcaa tttggggtag tattgcatca taactatatg
    21661 ttatgaaatg gatttttcac agggaatgtg ttaaaatagt ctatcgacga tgattgtgag
    21721 ttaagggatt gtattatatg agattttata cgccactaag atatcccgga ggtaagggaa
    21781 agctatcgta ttatataaaa tctctgcttg aggcgaattt aatcactgat ggatattacg
    21841 tcgaaccata tgctggtggt gcggcaattg cattggattt agttgtaaat gaatatgtga
    21901 gaaatatcat aattaatgat gcagatcccg ctgtatatag tttttggcat tccgtgatgc
    21961 atgaaacaga tgcgctttgt acaatgattg aagaatgtaa tgtaacaatg gatacgtggt
    22021 atgagcagaa agaagttatt agctctgata atcccgaaaa ttcattagca ctgggtttcg
    22081 ctgcattctt tttaaataga actaaccgtt ctggaatcct aaaggctggt gtcatcggtg
    22141 ggaaagctca atctggcgaa tggaagatgg atgttcgatt taaaaaggat gatttgatat
    22201 cgagaattaa taaaatatct ggatataaaa atagaataaa agttacaaat ctagacgcaa
    22261 ttgagttgct tttaaatata aaaaacttaa cctcaggaag tgataagttg ctggtctatt
    22321 tagatccgcc ttattatgtt aaaggacagg atttatatag aaactattat gagcataagg
    22381 atcatgtcgc tgttaagaat gctttgagtg aatcaggaat aaataactgg cttgtctcgt
    22441 atgataatgc tgaagaaatt aaagaaatat attctgcgtt taggcagtca gaatattcat
    22501 tgagttatac agcccagagt aaaagagtag gaaaagaagt tatgattttc tctgattcat
    22561 tgataatccc tgatgtgaat ttagggaagg cagcataatt ttacgtttaa tattttttat
    22621 cacatgatta tgctacatga gtccagtttc ctacctgcta aaaatggcag gtttttttat
    22681 gtcattaata cacctaagag catcacaaaa gcggtatcgc ccgctgtgtc cgggatagcg
    22741 gagtaaggct caatgtccgt tggtagacga caaaaacgga accgctaata gtttgttagc
    22801 ttcgtattta tattttgaaa tgttttgtta cgtgagcgct attagccgta ggagatgacc
    22861 aatggatagg gagtttgaac agtcactgat tgttgagcgt attgcctttc tggccaaaaa
    22921 tgccgggatg gaggggaatg atgagcggga caggcaaatt gcgctgatct ggattgctga
    22981 actggcgggg caattgatga cgttacaagc cgcgtaatgc ggcttaggcg gcagcggttc
    23041 tcagcaggtc taatgccatt tgtcgctgtt cgggtttcag gttattcaac accgtttgca
    23101 gtaactgatc gccggttttg gcgctggggc tgagtgtgtg ggaaaaggtc aggttcatca
    23161 caaaggtgta gccgcattcc acatctgcac aggcgcagta aatatctgca atctgtcggt
    23221 gtttgcggtt tgtcttgcgg ataacggctt ttgcgccgca ctccgggcat tcaatcttta
    23281 atacccgcat attccatgct ccggcctcta aaatatggct aaattttaac gttttatgcc
    23341 ccattacgca ccctgaatcg ttgtatcatc gccaacatca aagattaaat gcagattttg
    23401 cggtatttcg gggtctttat tgatggaggc cataaaacgg cgctgaatgg ggatcacctc
    23461 gtctttgcgg tacgtgttcc gcgccttttc cgggtcgccc agcccggcag cgttttgcgg
    23521 gatgatgccg cacagcccag ccgggaaacg gtgtgcattc agtacatcct gggcgctgat
    23581 gtttttcacg ttggcgaatt cgtccttggc gctgatatcc cccatctgga taaattgcac
    23641 cccttcctta tcgccgtttg gaatattcac cagaatagtg gagaagttgc cgatcccttt
    23701 gctgctggct aactggcgct cgatttcttc ctcgatctcg tcggtcatgt tcgggtcgct
    23761 ggtgtagagg ataccgccgg tgtgtgcccc gttatggtag taacgacgcc gaaaaatcac
    23821 cgcttcactg ttcagcaagg ccgagtgaat accgccgatg taatccggca ggccgtaaat
    23881 ctgctgttgc gggtcgtaca tcttgatgaa aatcacgtct tccggcgggt aaaccagcgg
    23941 ttcgcctttc tgcaatacca caaattcccc ggttttgcgg atgcgggtat acagcgcggg
    24001 tagcggcgtc agggcgatca cctctcccca gccattgcgc actttcagga tggcaatatc
    24061 accaaaggtc aggtagtcga atgcggcggc cagcatgtca tcgtgagaca ggccaccccc
    24121 ctgataatcc gacgctacca tgttacggcg ggcatagagg atgccgccgt gctggccgtt
    24181 caggttgacc agttgagcca gggcgagccg gtctatcggc agggtgtagt gattaaattc
    24241 attgtcatac cacacgtcgc ggtaatcggt gccggtagtt agcaccggtt ccggcttgcc
    24301 gaaagtgata atactcatct ttttacgcgg ggcgttttgt gccttctggc ggcggtgtga
    24361 tgtccttttc atgctgcttt tttcagtctc catcgggatt gaggtttgtt ctcatagttc
    24421 agcggctcgt tatccagtgc gtgcgcgata gcgaagaacg cttccgcatg gccggtttcc
    24481 gcgctgcgat cggcgatgaa cgtcatggcg ttgccgctgg ccgtggtggt gcgtcgtatc
    24541 gccataaatg acgccgggat agccttttca tcctgatccc actcaatgcg ctgactttcc
    24601 accacgtcgg ccgctttcat caccaggcgg tttttggttt ccacgccgta gcggatagcc
    24661 gttgcctgcc tcatggcaaa gtgctggatg ttctcaaaca ccccggcacc gatgccggtc
    24721 acatcaatgc cgatataggt aaagtggtaa cgctggaaca gctttttgat ctggttggcc
    24781 tgataacgga agttcatgcc gtgccagttg acgaccagca aaacgcggaa tttctcgccc
    24841 tcgtaaatgg gcggggcgac aatcacaaac gtggacaggt cgccggagcg ggccgggtcg
    24901 tagccgcccc agacttcgcg gttgccgaac gggcgcgacg cggtcgggtc atgatcctgc
    24961 caggtggccg ggtctacgcc gcagcgctcc aggtcgtcaa agctgaatac ggcgtctttg
    25021 ttgtccacaa acacgcacat atacagcatg ttgaacgtgt ccacgttgta gcggttgcgc
    25081 agtttttcca ggctggccag attgaaaccg ccgcggatcg cgtcttccat cgtgataacg
    25141 taccgccact gaccatccgg gcagagccgc ccgccgtcgc gcagttcgtc aaagccgggg
    25201 aagttaaccc cggcgcgttt cttgttgccg cgtttccatt cttcgcctgt ccagaacggg
    25261 tacgcctggt gagttttggc gctgggggtg gaaaagtaag tggtgcgcca tttgtcatgg
    25321 gtggccattg cgctggccac ttcgttaagg cgggcaaagt tcggcaccca aaagtattca
    25381 tcgcagtaca gatgcccgct gtaggattgc gcagtgttct tgttggtgga taaaaagcgc
    25441 agttcggccc cgttacttag acggatcggg ttgccggtca gggtgatatc aaaatactgc
    25501 tgcgcaatgt tgacgatgta cgagcggaaa acctctgcct gggcgcgact ggccgacagg
    25561 aagatttgcg gctcaccggt cagcaccgca ttttcaaagg cttcaaaggc aaaataccag
    25621 gtggccccaa tctggcggct tttcaggatg ttgcgcacct gctggccaat attaaggcgc
    25681 aggtgttttt gatagccaaa caggtgttca tcagcccagg cgtcaaagtc ttctttggtc
    25741 aggctggaaa tgtcgttttt gcggtactgg cgctttttgg ccgggcgttc atcgtcgtca
    25801 ttgctgcgtg agccgggcgt gttgccgtga ccggcggcgg cgagtttttc tttatgcttg
    25861 ttgctctgcg cccgcagttt gacggcgtgg gcgatcagca tgtccatttc ctgcaattcc
    25921 agctcggtct ttttatcccg accggccagc aactgataac ggcgctctat cgcctcttca
    25981 gtactttcgg cgctgagtaa atccgcccag ccgaattttt gtgcccaata gtaaataatc
    26041 cgcgcattgg gcagatttaa atcagcggcg atttctttcg gtgtggctct ttttaaatag
    26101 agcagccgtg caacaccgat taattcatca gaatatttag ccatgccggt attatgcggc
    26161 gcgattttta ttttatgacc ggtgtttatt tcgctgtgtt cgtcaaagcg tcgttatccg
    26221 aatggagacg aataaagccg gtcgctgccc gtttcttatt ccgtaataat gccgttatcc
    26281 gacagaagcg gagtatgtaa atgtctcagt taatgactaa ctggatctgt atcgccacgg
    26341 agggggaaac ggttgataag cgggtaatgg aaagacagtg gttaattgat gctgctgaaa
    26401 cctatgaccc gcaactctat accgccctga tttggccgga gcatgaaaca tggttcggca
    26461 atgcggggga ggtactggca ttaaaagccg aaaatggtga tgacgggttg ctgcggttat
    26521 tcgcccagtt acgcccgaac caccagttat tgcaggctaa ccgggagggg cagttactgt
    26581 tttgctcggt ggagctaacg ccagacggga attttcgtgg cacgggaaaa acctatcttg
    26641 aagggctggg cgtgaccaat accccggcca gcgtgggaac cacgcggcta cgtttcagta
    26701 gcaaaaagcg cggccgttta ttcggtgcat taaagccgct ggttattgat gaagtaaaag
    26761 aaatcaaagg gaatagcatg gcaagtaaat catggcatag cctgttcggt attaagccga
    26821 aggcattcgc tgagggtgaa ggcgaaagca acgatgcagg cggtgacgat aaattgcagg
    26881 cactggcgga agcgctggcc gaactggaat cccgcgtaac tgcgctggaa agtcagcaaa
    26941 gccagaccac cgatgcagtg gaagccgttc aggacgatat ggacacggta aaagaggtgg
    27001 tggataccga agatttcgcc acgctgcgta ataacctgcc gaagatttta aataatttcg
    27061 gcaagttgga tcgctctatc actaaattgc cgcagcgtca ggtcggcaat aaacccaaag
    27121 ggtttaattt cctgtaagtc catttttttg gtgatacctc tttttttatc tcgacatcga
    27181 gaggacgcat tatgttttta aatcagcggg cgcgtgaata tctgagcgcc tacagtgtcg
    27241 gtctggcgca ggaatatggg gtagcggata ccgcccgtta tttcgcgctt accgacccga
    27301 aagaaaccca gcttcgtgct gccctgctgg agcgtgtgga tttcctgtcc atgattaacg
    27361 ttctggatgt ggatcagctc tccgggcaag tggtgtccgt gggcagttcc gcgctgcata
    27421 ccggccgtaa ggaagggggc cgctttatcc gtcaggtcgg cgtggaaggc aacgactata
    27481 agctggtcga gacggattcc tgcgcggcac tgccctggga tctgctgtcg gtgtgggcta
    27541 acgccggcgg cgaagatgag tttttccagt tggtacaggc gttttcgaat gaagcgtttg
    27601 cgctggatat gctgcggatc ggctttaacg gtaacagcgt tgccaaaagc accgacccgg
    27661 acgaaaaccc gaacggcgaa gacgtcaaca ttggctggca tcagcgcatg aaggatttca
    27721 aagacgggca gcaaattatc actgaccggg tggtactgga cgaaaacggc gattacaaat
    27781 cactggatgc gatggcctcc gatttgatta acgccaaaat tccccagcaa taccgcaatg
    27841 acccgcgtct ggtggtgatg gtcggggcgg atttggtcgc cgccgaacag tatcgcctgt
    27901 tccagaaggc cgaccgcccg accgagaaga tcgccgccca gatgctggac agcaccattg
    27961 ccgggcgtcc ggcgattgtg ccgccgttta tgccgggcaa gcgtatgacc gtcaccacgc
    28021 tgtcgaacct gcatatctac acccagcgta atacccggca gcgtaaagct gaattcgtgg
    28081 aagaccgcaa acagtttgaa aacaaatatt tgcgtaacga agggtacgcc gtggaatacc
    28141 cggaactgta tgcctctttt gatgaaagcg ccgtcaccat cggtaccgtg gccgagcctg
    28201 cagaaaagga accagcgtaa cgcatggccc tgtcacccgc gcaacgtcat aacgcccgga
    28261 tggtcgccga gcagcagtta tcccggtgcc aggcggtatc cggcgatcac agcctgcatg
    28321 tgcaactccg tgcgctggaa aacgacgtgg cacggctgcg cagtcagccc acgttacgcg
    28381 acagggtaga gatgaaacgc cgggagttgc tgccgcgctg gttgccaacg gtacagcgct
    28441 atctggacag cggcgaggtg tatcaaaacc cggtgttcgc gcattgcgtg gtgtggctgt
    28501 ttgatgtgga agagtttgat caggggctgg cgtgggcgga tatcgctatc gcgcagggac
    28561 agcacacccc tgacaacatc cggcgcacgt tcgcggcgtt tgttgccgat acggtactgg
    28621 cctgggcaca gcagacagcg gacatagggc agagtgtgga gccgtatttt tcccgcacgt
    28681 ttaagaatgt ggcagaaaac tggcggctac atgaggagat caccgccaaa tggttcaagt
    28741 tcgccgggct gttactgctg cgtgatgagc aggggcaacc acgagcgacc gcagcggcgg
    28801 atatcgacac gctgacggcg gcggatgccc tgttgcatca ggccgagcag ttttaccgcc
    28861 aggttggtgt gggcacgatg cgccgcaata ttgccgcccg cattcgtgcg ctgcaaaagg
    28921 aataaaagac taccgcaagc caggcgggcg cggctgaggc aatgcaccgg gggtgcgatg
    28981 tgccgtggaa gccggtcagc ccgccttttt acgggggatg catgttcagt ggaacaccgg
    29041 ttgattatca ggatgagcta ctggccaaca atggattttg gccagacctg aacgtcaggg
    29101 attttcagtc acagcgcacc attcccgccg atctggctgc cgataccgtc gcacaggcgt
    29161 tactggccgc agtgggcgag gtcaacgccg atctggctga ggtggaggcc agccgccggg
    29221 cgaaggggtt tatgcgggcg caggatgtgc caggcgtcag cctgaaaggc cagaacgtgc
    29281 tgtgtgcgca gtatcaaaaa gcggtgtttg ccagggcaaa agccgatttg ctgggcgagt
    29341 ttgccaccat tggccgccgc gagtctcatc cgggacagga gggagacgac acacgcaagg
    29401 gattgctggg ggaagcggcg atggtgatcc gccgcatgaa agggctgaaa cgggcaacgg
    29461 tgcggatggt atgagcaagc tggatgacct gaccaccttt gtttcgacac atctgccgcc
    29521 ccgcgtgatg caggggtttg acagcttcat ggatgaagtg agctttatcc ccgcccgccg
    29581 tgacctgggc gaagaccagt atcaactggc ggtgatgaag tttgatgctg tgttgagctg
    29641 ggagcgctgg ccataccggg tgtgtgaccc gcgcaacctg tgcgctctgt tactggtctg
    29701 gcaggagggg caggacgatg tgccgtacat ggatgccggg ctggatatgg agttgcccac
    29761 actggatgtg gacgtgcgcg atcaggacag cgcgattgtc gtggtgtcgc tgcaactggc
    29821 ggaatcactg gcgattgtgg ccgatgacaa cgggatcatc ccgtttgatg gtcggcgctg
    29881 gcgtctgacc agcccggaag tctggcaggc cacatccggg catctgttcg gtgccggcga
    29941 cgacggggcg gaggtcgggg cgtcatgatc gtgcatggcg aactgagcca gtcacagctg
    30001 gccgaactac gcaccgcatt gcaacggctg acgctgccgc ccaaaaaacg ccagcgttta
    30061 ctgtggcggc tggcgaaata cggggtgatt gcggcggcaa aacggaacgt ccgggcgcaa
    30121 caggcaccgg acggcagcgc ctgggcggca cgacgcggcc accgacgcgg caggatgctg
    30181 cgcaatctgc ccaacctgtt gcatatccgc gaaatgccag agattcaggc ggtacggatt
    30241 tatctacagg gcggcgggta tcgcaacggg aaaacgccgg taccggcggg cgtggtgggc
    30301 tacagccaac aaaacggcat gagcgtatcc gtcaagcgtt cacaggttgg caatggacgc
    30361 cctgagccgg gacggatggc cacgcggcga caggcccgca aactgcgggc gctggggtac
    30421 cgggtaaaac gcggagcgcg atggaaaaag ccgccgtacc gggagattga ggaaagcctg
    30481 agctttgcgc aggcgggatt actcatccgt aagttgagcg gcaaggcggc aaaaaccgcc
    30541 tggacagtag atgttcctgc ccggccattt ttgggcatga acgatgcgga gtttacaaaa
    30601 gcgctggcac ggcagctaca gggcattggc tttggctggg atgtgaaagc gcaggatatc
    30661 aaggggtaag catgagttgg ccaacggttc aggttaacca ggttaaccaa ctacagggcg
    30721 aaaccagcga gattgagcgg gtagtgctct ttatcgggga agggagtgtt gagacggtga
    30781 aaaccgtgcc ggtcaatacc caaagcgatc tggatcaggt gctgggggcg gcggattcgg
    30841 tactgaaacg cgacgtcagc gccgcgatgg tcaatgcggg acagaactgg agcgcttttg
    30901 tctgtctgct gccgccaaaa ggcgactggg tgagcgcggt tactgccgcc caacaggtcg
    30961 ccagtgttga aggggtcgtg gtgtccctgc ctgccaccaa aggcattatc gcccaggcat
    31021 cgagcttgcg atccacactg gtgtcagcat tcgggcgctg ggtgtggttt cttctggcgg
    31081 ttgacagccc gaaagagggg gagggctggg ataagtattt acagagcctg agtaatttac
    31141 agaacggtgc agcggcaccg gcggtgcaac tggtgccgag gctgtggggc aatgagccgg
    31201 gcgtgctggc tggccgcttg tgtaaccgtg cggtgacgat tgccgacagc ccggcgcggg
    31261 tgcaaaccgg tgccttactg gcgatggggc gcacggattt accgatggac ggtgccggcg
    31321 tgacattgga tctggcgatg ttgcaggcac tggaaaaaca gcggtacagc gtgccgatgt
    31381 ggtatcccga ctatgacggc tactattggt cagatgggcg caccctggac gtggaagggg
    31441 gcgactatca ggccattgaa aacctgcgcg tcgtggacaa ggtggcgcgg cgcatccggt
    31501 tgcaggcgat tgccaaaatc gccgatcgca gcctgaacag tacgccgggc agtatcgcgg
    31561 cgcatcaggg gtactttgcc aaaacgttgc gtgacatgtc ccgcagcacc caaatcaatg
    31621 gcatcacctt tccgggggaa gtgaagccgc cgaaggatgg ggatgtggtc atcgcgtggc
    31681 gctctaaaac ggcggtggaa atttatctga ttgtccgtac ctacgaatgc ccgaaaggga
    31741 tcacggtcag tctggtgttg gatatgtcgc tggagggtag cgcatgacaa aacggatttc
    31801 gggccagtcg tttgatttca atatggacgg cgcactggtt cacgcggaaa aagtctcgct
    31861 gagtatcacg gataacaccg ccgccgcgca gacgcagggc atccccgatg gctgggtggc
    31921 cggtgacgtc gccgccgaag gtgaaatgga gctaagtacc aagagtctgg cggtggtgac
    31981 ggcgaaagcc agcagcgccg ggtcatggcg gggtatcgat ccggtggact tgatgtggta
    32041 cgccaaggcg ggcagcgagg aaatgaaggt ggaagccttc gggtgcaagc tgatcctgag
    32101 tgacattctg gatgttgacc cgaagggcgg cagcgtgatg tcacacaaga ttaagtttgt
    32161 ggtcaccagc ccggattttg tgcgcatcaa cggtatcccc tatctggaat cggaactgac
    32221 ggaaaagctg atcggctaag gacagtcatg caggaatacg aaaagaacgc gctgggatta
    32281 ctggtgctgg gggcgctgat tgcgctgggt aagttgctgg ccagtgatga aaaaatcacg
    32341 ccgcgcctgt ttttcggccg gatgattttg ggatcggcca cctcaatggc ggccggagcg
    32401 gcgctggtgt gggtgccggg gttgccgccg atggcggtca ccgggctggg tgcggcgctg
    32461 ggagtggccg ggcatcaggc ggttgaaatc tggctgcgcc gccgtggcag tggtttgctg
    32521 aaagggagtg acgcaaaaga tgacgttaag tgaaaaacag cagttattta cccaactggt
    32581 cgcacagttg atccagtggg cgggagagcg ggggtatcgc ctgacgttcg gcgaggcata
    32641 ccgcacactg gaacaggcga agctgaatgc ccacagcggg tccggcatcg ccaacagttt
    32701 gcatacgcaa cgcctggccg tggatctgaa tctgtttatc gatggtgaat accagacccg
    32761 aacggaagcc tatttgccgc tcggtgaata ctgggaatcg ctgggtgggt gttggggcgg
    32821 gcgctttacc tcacgcccag atggtaacca ttttagcctg gaacacaacg gggtacgctg
    32881 atggatgggc tatggcgggt tgtggcggga ttgacggtgg cctttgccgc tggctggcaa
    32941 acggcgagct ggcagcgcga cagtatcgat ctggcagtga ctcgcgccgc taccgccgcc
    33001 gctgagcaat cacgccaggc gttacaggca ttggcgagcc agtccggcga ggcgctggaa
    33061 tcgaaactgg aggcattacg caatgtgccg aataaaaccg tttaccggga aatcgttaaa
    33121 ccggttttta ctaacgtgtg cctgtctgct gagtttgtca gcctgtacaa cgacgccgtt
    33181 aatcacaccg aacgtgtctt atcaggaaaa cctgaaaaag aaatgtccgg tcaataatct
    33241 gccgcgctta tcaggtacca ccggcaatga tgcagcgcag ccgttaatca gttggccgca
    33301 aatttatgcg gattgtgccg cccggcataa tcagttaatt gatgaaataa cccaacggga
    33361 aaacatgcaa tgagcaaaat taccttatct gtttctggca aggaattgtc gtttgaaccg
    33421 aataccgttg cctataacgg catgattaat gatatggcaa tggataataa agtggctccg
    33481 gcggtgacgt atcttcgccg tattgtcgta gccaaagata aagaaacgct ggatgaatta
    33541 ttaaaactgc cgggtgccgc gctgcaaatt accgaagcgg ttaatgcgca atatgcaccg
    33601 aagttggaaa tcgaagtaaa aaactaaccc agcggctgcg ggccatcgaa aataattttc
    33661 ttgaacaggc attaaccctg cgacggcatt atttaccggc tgaaaatgat gatgccgata
    33721 atctggcccg cgccgtctgg ctggcaaata cacactggga aaatatgcgt atttccgtgg
    33781 cgaacgggat tgcgctggca ttaaaaggcg attcatgaag caactcgatt ttacattaag
    33841 tctgattgat aagctgaccc gcccggtaaa acaggcgcag gcggcggtca ccggctttgc
    33901 gaaatcgtcg cgggacgcct tttctaaaat cgcggttggc ggtgccggtc ttattggtac
    33961 cgctatgtct atccaggggg cgcttggccc ggcggttgag atgcacggcg caatggtcga
    34021 agcgtcagcg cgtggcgtcg atgattcggc gttacagaag attaatgcca acgcgctgaa
    34081 attcagcacc cagtacgggc gttcggcgct ggagtatgtg caatcgaccg cccggattaa
    34141 tgcggcggtc ggcaccctga ccaaagagga tttgccgggg gtggtcaggg catccaatgt
    34201 gatggcggca gcgctgaaag ccacagcgga cgaatcgtcc gaattcatgg ggcagatgtt
    34261 tgccaacttt cgctctgatg ccgaatcaat gggtaatgtg cagtttgcgg agcaactggc
    34321 cggcaaggcc gcctatatgc gtaatgcctt cggtgttgag ctgggggcga ttaaagacct
    34381 gatggaaggc gcgcgcgggg tcggtaccaa ctatggcatt ggtatggatg agcagttggc
    34441 cgtgatgggt gagctacaac gcacattagg tacggaagcc tccagcgcgt atgaaggctt
    34501 tttgtccggg gcggtcaagg gtgcccaaaa actggggctg tcgtttgaag attccaacgg
    34561 caagttactg accatgccgg cgatgctgga gaaattgcgc gggaaatacg gggcgagcat
    34621 tgagggcaat ctgaaagccc agtctgatct ggatgatgcc tttggtgaca gtgcggcggt
    34681 cattaagcag ttgtatggca atgtcggcgt cttgcagcgg catatcaccg aactgggcag
    34741 taatgacggt atgacgcggg ccacggaaat ggcgcagaag atgaccagcc cctgggaacg
    34801 gctgaccgct atctggtacg ccatccgcgc cgcgatgggg gccacgttgc tgccggtgtt
    34861 gtacccgctg atcaacaaga tggcggacgg cgggcaggta ctggtcaggt ggctgaattt
    34921 gttcccgaat atcacgcggg tgattggtta ttgcgtactg gctgtactca gtctggccgg
    34981 tgcgggggct atcgccaata tcgtgatggg tgtttctgtg tttatgctcg gtggcctgaa
    35041 agggttatgg aaagggctaa ccgccatcat gaaaattcat gtcggtgtta tctggctgta
    35101 taacaaggcc gtgctggcat gggcggcgac gatgcgtatt ttgcgcggtg tactgctggc
    35161 cgttcgtatg gccagcctgt taaccggcat ggcattcaat atcgcgctgt ggccggtgtt
    35221 gctgattatc ggtgccgtcg ccttgctggt cgccgggtgc tctctgctga tccggcattg
    35281 ggatggcata aaaaacgcca tcactcagac cgacatgtgg aaaaccgttg cggaaaaagt
    35341 gcaatgggtt gcggagatat ttagccagac gtggaaagcc attattgatg gctggaaccg
    35401 tgttgttaat gcgatgggga gtttctccct gaccgagacg atgggaaaaa tggctgatgg
    35461 cgtcggggag atattttccg ggttgtggga cggtatttta gcgtcgttca attcgtctta
    35521 ccgctggatt attggaaagc taaacgcaat tccggggatc aatatcgcca tgcctgagtc
    35581 tgttccccgg ccgggcggtg agggtttatt aacgggtggg aaaataaagg ggattgattc
    35641 gggcgggttg caacgggata tcagtaacag caatgcgaag aattacaccg acaacagccg
    35701 aaaagtcgaa aacctgacga tttacgccaa taaaggattt acccctgagc aattaacgga
    35761 atgggaagca ctgcggtaat ggatgacgtg aaatatattg acctgctaat tacagaacgt
    35821 gatttcagcc tgaattcggg gcgtgagccg atattttgca ataaccggat cagtattggt
    35881 caggattgcg tgcatgccat tattgaaagc gggctgacca ccaaactggt ggccgagcgc
    35941 agcccgacgc tgcgagccga tgtgctgacg caaatgatta ttctggtgga agacgatgaa
    36001 cggattatcc ccggcacggt ggtgatcagc gaagaaagcc cgacccggct gtgggtgacg
    36061 gcggaaacct atgatttcgg gccgatcacg gccagggtgg acgtatgacg gaaaagccaa
    36121 aaattgatta tgagcaggtg ctgaaagagg ccggaatgcc ggtgacggcc gagacggtaa
    36181 cggaacagtt tcaggcacaa gtgacggcat ccggtctggt cactaacacg tcgcggatgt
    36241 cgccattctg gcggctgatt tcggttatgg cgacaacgcc ggttatctgg ctgaaagatg
    36301 ttctgatcag cgtggtactg gccaatatgt atctggctac ggcgtccggc ccattcctca
    36361 atctgtttgc ctggggtgtc aatctgtcgc gcaaggcggc cacggcggca gcgggcgttg
    36421 tccgtttcta taagtcggat gcagcacagg cagtggtgat cccggcgggt acgctgattc
    36481 agactgaacg cattaacggc acggttttca gtgtggcggt atcggtggat accgtgattg
    36541 ccgccggtct ggccagtgct gacgtcccag tgaccgccac ggcagacggt ggggcattca
    36601 atctggcccc cggttattac cggattttac cggtaggggt tgccggtatt gaacgggtgg
    36661 agaatcaaga agactggttg ctgacgcccg gcgcggatga agaatccgat gatgatctgc
    36721 gtgagcgctg ccgcaaccag ttcaatctgg tggggaatta ccacaccgac gcggtgtatc
    36781 gcagcatgat tgcggcggtg gccggattga gcattgatcg gattttcttt cagcatgacg
    36841 ccccgcgtgg gccgggcacc gccaatgctt atttgttgct ggattcgggg gtagtgtcac
    36901 agccctttat cgatgcggtg aatgattaca tcacggcaca ggggcaccac ggccacggtg
    36961 atgatttgcg ctgtatggca ttgccggaaa cacagcatga gttaaccgtg acggtttatg
    37021 tgcgcaatct ggtgaacgtg acggatgagg cgttagccgc gttgcgtagc ggatgccagg
    37081 atttagtccg ctgtgccttt cgggaaaaca ccgggtatga cgtggcaaag acgtggccct
    37141 ggtcgcgttt ctccttttcc acgctggcac aggaattaca tgatgcgttt ccgctgattg
    37201 cgtcactgga tttttccctg ggcgatattg tcagcgggct taatgtgccg cgtctcgcct
    37261 cgctgacagt ggtaatagcc gatgcctgat tttaaagaac aactgtcggg cctgcgactg
    37321 ccgtcatgga tggataaggg cgagcccgcc gcgctgctga atgccagcaa agcctattgg
    37381 ttgcaggtca atgactggct gcgctggccg ttgcagcaac tggacgtcga tacctgcgcg
    37441 gagccgttgc tgaacgtact ggcgtatcag cgcgatattt cgcggctgaa aggggaagcg
    37501 ctaacgcttt tccgtcgccg ggtgaagtac gcctttgtga atgcgcagga ctcggggagc
    37561 gtcgcggggt ttatcgccat ttttgagcgg ctgggcattg gtgctgtcac cctggccgag
    37621 cgtcaaccgg ggtatgactg ggatgtgatc cttgtacgta tcaacgatga gcagttaagc
    37681 ggttataacg ccctgatgat gagtctggtc aggcagtacg gccgcacctg ccgccgctat
    37741 gtgtttgacc tctggaatgg ggaaacccag tcagtccggt gcggggagtt tgagcacaac
    37801 gcagaatact accacgcagt cagcttgatg ccggccggaa cggtaacggc gcgtgttgcg
    37861 ttgcaccctg tgcgcacatc cgcttcgaca gaatattatt cagccaacgt gtaagaggga
    37921 ttatggcgca gagtgtgatt acccatgcgt ttgaaacgtg gaatgttcag cgggttttag
    37981 acggcacggc agcccggccc gatcaggtcg tttttgcgcg ggttccgggt caggatgaat
    38041 cggtgccggt agaccgaaat gaagggctac cgcctgccga tcagattcag cataccgccg
    38101 ccattaccca ggccggtgtc ctgaatgaaa acgcggtggt ttattcggtg gtgctggata
    38161 ccaccgtggg ggattgggat tacaactgga ttggcctgct ggacagcaaa acgaataccg
    38221 ttttgatgat tgtgcatgta cgcacccagc agaaactggc gacccgaaac ggccagcagg
    38281 gcaacagcct gacccgtaat ctcatgatgc aatttgatgg cgcggccgct gccacgcaaa
    38341 tcaacgtgac agccgatacc tggcagattg atttttcggc ccgtctggca gggattgatg
    38401 agcgtatccg cattgaaaat atggataggt atggttcatc cgcgtttttt ggtaatgcgt
    38461 atcaggttgt caaagatggc aatgcgtatg ttgtaaaagc cggagtggcg tatgccgctg
    38521 ggctgcgtgc ttggctgtcg agtgatctaa aaattacggt ggatgccttg ccgactcgtg
    38581 tctttctgga tgtgtgctgg cgtggtgaat tcacacaggc atgggcggtt gatagccaga
    38641 tcgttgttgc caactcggca gatcatgaaa tacgtgatgg tgttcagcac tatttgcttc
    38701 ctgtcgcgga tattgatgaa aacggcaata ttaccgactg gcgtaaacaa ggaagcctgg
    38761 cagaacaaaa tgcgcagacc ctctatcttc gtaaggacga taatctggcc gcattacgtg
    38821 ataaagaagc cagccgaaaa aatttagggt tgggtcagct tgcggtaatg gataccgaca
    38881 cagccagaca aacgcttcgt atcacccaat tagaaaatga actggtaggt atccccttgc
    38941 cttatcccgg cgcaacagcc cctgacgggt ggctgaaatg taatgggcag tccttcaata
    39001 aatcgatgta tcccctatta gctgggcgtt acctgtcggg ttttttacct gatctgcgcg
    39061 gtgaatttat ccggggttgg gatgatggac gaggagttga tgccgggcgc agtttattgt
    39121 ctgcacagac ccaaaccgtt caagaccata aacatgttgg cacaatggtg aacagcaatc
    39181 ctctgcaaac cggtatgaat accgggatcg gtttgttgtc acaatatacg tcaacgccaa
    39241 cagtcgggta ttcaaatgaa atcagcagcg gcggaacagc agaagggagt aaagaaaccc
    39301 ggccccgcaa cgttgcattc aactacatcg tgagggctgc ctgatggcga attattcagt
    39361 gaatgttaaa gaaacgacgt tagataaaga cggtcacgct atgatggcgg ggtggatcac
    39421 cgtctttcat gttgatgcca aaacgcggga atatcgcggg gccagctatg aatatttgat
    39481 ggccggggta ggcattccgg ctgacagcta tagtgatgca cccgagttac cgccagaagg
    39541 aaaggcgtta tgccgtgctg ccgatgggct ttcgtggatg agtgtaccgg attatcgcgg
    39601 cagggtggcc tatgatacgc aaacccgcct cagtactgaa atcaccgtgc ctggccagtt
    39661 gccggaaacg ctaacgctgt tagcgcccgt ttcggaattt gatatctgga atggcaaaaa
    39721 atgggtgacg gatacggatg cacagcatca ggcgtatgtg aatagcgcaa tgcaggaact
    39781 gaacgagcgg tttactacgg ccaatacccg cattcaggcg ttaagcgatg cggtggacat
    39841 ggaactggca accgaggaag aaaaggcgtt gctgggtaaa tggaaagagt atcgcgtgct
    39901 gttaaaccgg gtggatgtga atacggcccc ggatatcgtc tggccggaga ctccggcggt
    39961 atgacgtggc gacaggctga tctttgcctc tcgtccgctt tgccgccgtt gacctgttcg
    40021 gtgttgccgg ttcatccgtg gatctatggc gtgggtaacg tgaccgataa cggccattat
    40081 ttaagtccgg ccaatgcggt ggcttacctg gctgaacggc taggcactgc ggcggataat
    40141 ctgaccgtgt gcgtgtggat ggtctgcggg agtgggctgg gggaattcct gcaagcgctg
    40201 gatgcactaa cggtagtttt ccccgctccg gcattgagcc aggttgcccg acaggcgcgg
    40261 gctatggcgg agctggctac agtgaaaatg caaatcccgg ccaaaaactg cacgttcccc
    40321 gccgccgcgc cgttgtcggt ggccagctgc cgccaggcgt tgaatgccca gcgtatggca
    40381 gcggcgcagc agcaggccgc tgtaccgatg gggctgaatg cgctgaaggg gatggctgag
    40441 cgctttacat cccagcgcga ggccgcttta tcggaaatca gtaaaaccat gcagcagatg
    40501 gcccagcgta gtgcgctggc gtgggttttt accgggcagg gtgcgatggg tgtgatagcg
    40561 gcggagatgc tgaaaaatat ccctcaaccg tctgcaattt ataccgctgc catgatgttt
    40621 acagggaaag agctggatgc gttggagagc atgatccgtg agccagataa ttacactcgc
    40681 ccttgatggc gaagctatcc ccttgcgtgg cttgaccgtc acgccctcaa tgcaattcga
    40741 agaaaaagac cagtccgggc aaacgtccag cacggctaac gccgagcagg gtatcaagcc
    40801 caaagagctg cgcgtgtcag gtgtaattcc gtttactgag gcgaaagtgt taacccggct
    40861 gtttgccctg gcggaagcca aagaaggcga ccagttgaaa cgctatcgcg tggccaacct
    40921 caccgcgcag gcgatcaact tccggctggc caccttcacc gggtcgattg acgccccaaa
    40981 acaggatggc aaacaagcct ggctggtgac gtttacgttg cgcgaacata tcagcgtatc
    41041 ggaaaagcgg gacgcccgcg caggcaatca aacagaaacg aagaagcagg caccggggca
    41101 ggggagtgct gccggtgagg gtggtgaaaa attaagctgg tttgagcgca aagtgctgaa
    41161 accggtcaat gacgcgctgg ggtaagccat gcgaccgatt acgcgactga tgttatctgg
    41221 cgatgcggta catgttgtgg acgccaatgt ggtactggag ttaaacgcct gtggccgggg
    41281 atttatcacg gttgagactg agcaggatta taccggcaaa ctggtcaggc tggatgtggg
    41341 ctataccgat ctggtgttgc gctggtttac cggttacgtc gagcggagcc aacccgccga
    41401 aaatggctat caacgcttgt ttgtgcgcga actggcgggc gtatttgacc ggatgtggcc
    41461 gtgttcgttt cagcatccga cgctccggca actggcggac tggctgagtg agcacagcgg
    41521 gttaacggta caattgccgg acgcggcgta tgtgagtaaa cctatcccgc actttaccca
    41581 tagcggcagc ggccatcagt tactggccaa tatcggggcc gcgttcggga ttgatgatta
    41641 cgtctggcaa ccgttaccgg atggtgcgtt atatctcggc agttgggcgg attccctgct
    41701 ggccggtgcg ccggtcagca ttccggcgga gttcagccag gcgcaggccg ccggtaatag
    41761 tatgacgttg ccactgatac agtccgtcag gcccggcgcg gtggttaacc agcagcgcct
    41821 ttcccgcgtg cagttgctca acgaaagcat gacgatagag tgggtgccgg tgagcactgt
    41881 caccggcaag gcggcgcagc gcagccctgc ccagcgtcag atcgatactg cttatcctga
    41941 actgtcggcc ggattgcatc tgccgaagtt tgcccgcgtg gaagcgccat cagaagcggt
    42001 cagcagcggt aatatcgccg accctttccg gccccgttat gcggttgacc tgcaattact
    42061 ggatgcagac ggtaaaccgg cgaaagatac gccggtgtat ccggcagtac cgctaccggt
    42121 acctatggcc gggagtgagg ccgggctatt ccagtttccg ccgccgggta cgctggtcga
    42181 ggtcgggttt accggcggcc ggccggataa accgtttgta cgtcagaccg tggccagtgg
    42241 tcagtcattg cctgatatca agccggggga gcagttacag caacagcggg cggaggtttc
    42301 gcagcgtgtg acggtcgccg gggattggga gcggaagacg gatcaggcca tcagggaatc
    42361 gtcaatgcac cgggaggtga gcgcagatga agaacggcgc acgctggtta ccagagaaac
    42421 cctgattaaa gcgacggata gcgccacggt gctgggtacc cacacgctcc aggccggtgc
    42481 catcgtgcaa atcgcccaag gggattatag cctggctacg caggccggtt atacggccag
    42541 tgtgggccag tcagcgacgg tagagatagg acagtcgctg accgagaaaa tagggcaact
    42601 gcgccgcagc attgccggtg cgcgtcagga actgatggcg ccagtggtgt gggtcggtag
    42661 ccagcaggtc aacgtcatga cgctgatgtt ggacacgctg gacgtgattc aggaactggc
    42721 gacgcagacg gccagtcaca cgcaccctaa caccggcacc ccgttaaatg cgggcgagat
    42781 acagcagacc ggccgccgta ccggcacact caaagacaag tacagcccga taatcgggtg
    42841 atcgatcccc acctacccag cccgccgcgt gcgggctttt ttacgctcac ctgacgcgct
    42901 tagcgggccg ctatgccacg ccctttcccg gccgcctcgc cgccatgcca accccttgca
    42961 ccgctgcctg taccccgctg acgcagccag cgcaccaaca aaatgaacgc tcacatgaca
    43021 aaatcggcac tacaccgcac ccgcctgcgg ttttcggatc gcaaagattt ttcagtttta
    43081 tttttctaca aaacctaacg ccaacccgcg ccgccgccgg gcttttgcgg aagaacgccc
    43141 actgaaaaca gtgaaaggaa tttcagcatt tttcagtttt ttggatctcg gcttaatcac
    43201 catgaaattt caactatcag aaatataatg gttttttatg gatttggtcg tttgggatgg
    43261 atccctgaat gtccatgagg ggttacctcg gttggggcgg tttgcagcaa tgatgcgggt
    43321 ttggagtagt gaggctgttt gcaggaactg aaacgatgtg aaccccgcca gggcggggcg
    43381 aggtgcttaa agtttgcctt cggtaatccc aaaatcgacg atgctcttac tttgaaggtc
    43441 ataggagcag ttgtatgtca tcgtgatttt tgcattgaaa ccgttggtaa atttcacttt
    43501 gtcaccgatg aacgtcattt gttttttggc ttcgttcagg cggaaatgtg aaaacatggg
    43561 ggtcatcatg ccgtcagtcc actcgaaatc atacttggat gacttttcta tcagaggacg
    43621 acagcgtgat gctgcttcaa tccagttttt atcaaacaag cattgaccgt catttgctgc
    43681 acaattcttt ggggtatcgg cttttgcggt gggcttgtca tcacttccgc caaagatttt
    43741 tatagcgccc caaaccagta acaccaggac cacaaaaccg ccgattgcct gaccggctgt
    43801 ggtactagga tttttaacgc cgcagtgcgg gcagactttt gcagaggttg atacttcttt
    43861 cttacattct ttgcattttg ttaaagccat aaaccaagtc ctatttgatt caaagaagct
    43921 aaataatatg acaagcaata ggggaaacta cagagaagac cgcgcgtatg atgaaagcct
    43981 gtcgccattt tgtcgccaca ggtaataaaa aaggggttcc gttttcacgt aaccccttga
    44041 tttaattggt ggagctgggg ggagttgaac ccccgtccga aattcctaca ccgtcggtac
    44101 tacatgctta gtctggtctt tacattcgct tgccagctgc ggacagacac gccactaaca
    44161 aactagcctg attggattta acgcttcaac cccaggcagg gcatccacgc gatctctttt
    44221 aggtttgacc tctcttgatc cccgtcctaa gagcggaggc tagggagaga ggacaccttc
    44281 agtttcttag gctgattaag ctgctaaagc agcaggtgcg aagttttcgt cgtttgcgac
    44341 tatttttttg cggcttttta cgaggccaac cgcccctcgg catgcacctt gggtttcgcg
    44401 aatcccgtcg aatccagaat cagccccaag atattttttt attataacag aaagatggcc
    44461 tgctaagcta gtgaccgtta gcgggcggca tttttcatga tgcgtgcttt gtccagtttc
    44521 cattcgcgct ctttgatatc gtcgcgtttg tcgtgctctt ttttaccttt ggctacgcca
    44581 accttgacct tgcaccaggc gtttttccag tacagcgcca gcgctacaac agtgtaacct
    44641 tctcggttga ctcggccgta cagcgaatcc agctcacgct ggttgagcag cagcttacga
    44701 gttcgggtcg ggtcgcaaac cacatggctg gaagcaccgt gcagcggtgt gaatgtggcg
    44761 ccgaaaaggt aagcttcgcc atcacgcatc aacacatagc tgtcgctgat attggctttg
    44821 cctgcgcgca gtgatttgac ttcccacccc tgaagtgcca atccggcttc aatctcttct
    44881 tctatgaagt attcatggcg ggcgcgcttg ttgagcgcaa tggtggcaga accgggttta
    44941 tgtgcttttt tctttgtcat agtgccgtca ttatactggt tgtcgtcgtg aatgaaatcc
    45001 ctcgccggga ttcataccgt tctttgtgaa tgggtgcgat gcccctcgca gaatttttgt
    45061 ctgaccgctc atcaatggta ttattttgcg cgttttatga atcacggaaa attgtatgcc
    45121 taaaatcagc cggtctgcgc tggtcccgtt cagtgccggg cagatgtata aattagtgaa
    45181 tgatgtctcg tcttacccgg cctttttgcc tggatgcaca ggtagccggg tactgtcttc
    45241 ctccgggagc gaaatgacgg cagcggttga tgtgtcgaaa gccggtatca gcaagacgtt
    45301 taccacctgc aatacgctta ttgataatca atgtatttta atgcgattgg ttgacggtcc
    45361 attccgtcaa ttgactggtg actggcgttt tacgccactg agcgatgacg cttgtaaggt
    45421 agagttgaat ctggattttg aattcaaaaa tgcgttgatt gaaatggcat ttggcaagat
    45481 tttcaaagaa ttggccaaca atatggtgca ggcgttcacc ctgcgcgcca aagaggtcta
    45541 ttgtgcctga gattcgtgtc gaagtggtct acgcgttgcc ggaacgccag tatttgcgac
    45601 cgctgacgct ggaagcgggg agcacggcgg agcaggctat tcaggcatcc ggcttgctgg
    45661 ccctgcgccc ggatattgat cttggcgtta ataaaatcgg catttttagc cgcccggcga
    45721 aactgactga tgtactcagc gatggcgatc gggtggaaat ttatcgaccg ttgctggcag
    45781 accctaaaga gttacgccgt cagcgcgcgg agcgttcaaa aaacaaggca cgataacgtg
    45841 ccttgttttt ttgtggacca gtcagcgagt gttagcctcg ctggacctgt tcacttactg
    45901 cgtctgcaac gtgggtttgt tgtccacatt agccagcaca ccctggctgt tgaaggtcag
    45961 agtcagcgtt tgctgtttca cggcttcgtg ccctggttgc tgacggaaga cgtagtacca
    46021 ggtgtctgat ccaaacgggt cttgcatcat cggggtgccc aacgtgtaga tgacctgttg
    46081 tttggtcatt ccgttgtgga ttttggctac gtcggcgggg gcgagatagt tcccctgatt
    46141 gatgtcaggc cgatagacta cgcgtcccag tgtggaacaa ccggcagtca acataacaac
    46201 aaccaccgca gcgacgacag tcagcgtttt acagcgcata gtgattacat tccttaaggg
    46261 cataggttgc agatgataat agaccttgcc tgacttgaaa acctgcaaga cgtctgtaag
    46321 accgcgggaa ttcgaaaaag ttgatcctca ctatgccgcc agcaattctc tggcgttcgc
    46381 cagcgtgttt ttggtgacgg ccgaaccgcc gagcaggcga gccagttcct gcagacgttc
    46441 gcgtttaccc agcggttgca tcagggtttc ggtcgctgcg ccgtcggtgt gcttactgac
    46501 aaagtagtga tgatgaccgc atcccgctac ctgcggcaga tgggtaacgc acatcacctg
    46561 agtagactgc ccaagctggc gcagcatctt gccgacaatc gctgcggttg ggccgctgat
    46621 gccgacatcc acttcgtcga aaatcagggc tggggtatcc atcttgcggg cggtaatgac
    46681 ctgaataatg agcgcgatac gagacagttc accgcccgaa gctactttga tcagcggttg
    46741 atgcggctga ccagggttgg tagtgacgca gaattcgatg tggtcggcgc cgttggcggt
    46801 cagcgagtcc ggcgtgaagg tcacatcaat cgtgaaatga ccgtgcggca tcgccagttc
    46861 atgcatgttg gtcgtgatca attccgccag ttcgctggcg tgctgacagc gtcgggcgtg
    46921 aagttgttcg gccacatgca gtgcttgctg atggaattct tgcaccgtgc gattcagggt
    46981 ttcgtgatcg ctttcctgct gctccagtag atgttgttcc tgcaatagct gctgataaaa
    47041 cgtgggaagc gcttccggcg tcacgtgatg cttgcgcgcc agcgttagct ggcgcgacag
    47101 gcgttgttcc agttcgtaca atcggattgg atccagttcc atactgtcgc aataatggcg
    47161 cagttcatcg ctggcttcgc tgatttggat gccggcttct tccagcatgg aaaacacgct
    47221 ggagagtttt tcatccatgc tcaccagttc tgaaagctga tgtctggcgc tgtgcagcat
    47281 gccaagcagg ttctgatctt cgttttcgct gagaatttgc aacgtctgct ggctgaggga
    47341 catcagttgt ccgctgttgg cgagccgctt gtattcaacg tcgatctgtt cgtactcgcc
    47401 cgcaaggggc gcaaactcgt tcagctcttt gagctgatat tgcagcaatt cccggcgcgc
    47461 ttcccgctcg atggtggctt gctgatgctg cgccagctcg cggcagcttt gatgccattg
    47521 ttgccagatc tggcgcatgg cgctgagtag ttgcgattca tcggcgtagg catccagcag
    47581 atggcgttga tgttccggtt ttagcagcaa ctggtgggcg tgctgcccat gaagctgaat
    47641 cagatgctgg cccagttcgc gcagttgcga cagcggcacc gccgtaccgt tgatgaatgc
    47701 gcgggagcgg ccgtcggcgc tgatgacccg acgcagcagg cattcgttgt tgtcatcaag
    47761 ctggttgtgt tcaagccagc gcagcgcggc cggtgtatct gccagcgaga agcgggcgca
    47821 gatatcggcg cggccggtgc cgggccgaac catgttggcg tcggaacggt tgccgagaca
    47881 gaggccgagg gcgtcaatag caatggattt ccccgccccg gtctcgccgg taatgacgct
    47941 catccctgcc tgaaaatcaa tttccagttc gcgcacaatg gcgaagttac tgattgtgag
    48001 ttgcgccagc atgatagtgt cctgtatgta acaataactg ttattacata cagtatagac
    48061 tggttttttg tacagtaaag tagcaagcgc tactttcaga ataatttttt cgaccagccg
    48121 agcttgctgc ttagtgtatt gaaataactg taattttcag ggtgaattag gttcaggtga
    48181 tactggctgc gttggatcag cacttcttcg ccttcctgca ccggcagcga aatctggctg
    48241 tcgcagctga tctccaggtc ctgggtgatg tgggaaaact tcagtcggat agcgctgctg
    48301 ctgttgatca ccagcggccg cgccgacaag gtgtgcggga acatcggcac cagcgcgatc
    48361 gcatccagcg acggggtcag gatcgggccg ccgccggata gcgaataggc ggtggagccg
    48421 gtgggcgtgg agataatcag gccgtcggag cgttgggaga atgcgaattt atcgtcaata
    48481 tagacttcaa attcaatcat atgcgccact ttgcctgggt gcagcaccac ctcgttgatg
    48541 gcagtgctgc tgctgttggg gtggttggcg cggcacacct gtgcttccag cataaaacgc
    48601 tgctcgcgga tataacgccc ggccagcact tcgcttagct gctgctgggt atgatccgga
    48661 tcgagatcgg taaggaagcc aagattgccg cggttgatgc caatgacgtt gatatcgtag
    48721 cgcgacagca cccgcgccgc gcccagcatg ttgccgtcgc cgccgaccac caccgccagg
    48781 tccgcctgct gaccgatttc cgacaggctg ccggtggcgg cgtccgttag ctgcaactcg
    48841 cgggcgatct gctgttcgat aaccacgtgg taaccttgtg cgcgtagcca gtgatacagc
    48901 atttcgtggg tggtcagggc gtttggatga cgcggatgac cgacgatgcc aatgcagtta
    48961 aacgatctgt tcatttgggt gacttatcct catgagagca ccggaggctc acggtttttg
    49021 gaccgatagc cgggccaaca atatgtgagt ggttcccttg aatgtgagtg gttctcttga
    49081 aaccccggtt ttgatcccca taataagcga actagcgaga tgaatgcgaa aaacgcggag
    49141 aatttcatga gtagtaaaga acagaagtcg cctgacgagc aagtcttgga tcaaaaggaa
    49201 gcagcggaag gtcagcaagc agatgccgta ccagagacga cagctgtcgc tgacccgcgt
    49261 gatgagcgta ttgcagaact ggaagcgcaa ctgaacgacg ctcagcagcg tgagcgtgaa
    49321 agcgcgctgc gtgcccgcgc cgaaatggaa aacgttcgcc gtcgtgccga gctggatgtg
    49381 gaaaaagcgc ataaatttgc gttggaaaaa tttgcgggcg aaatactgcc ggtgatcgac
    49441 aatcttgaac gtgcgctgga gatggcggac aaatccaatg acgcgctgtc aggcatgatt
    49501 gaaggggttg aactgacgct gaaagcgatg ctttccgccg tgaataagtt cggcattgag
    49561 gtggtggcgg acgtgaacgt gtcgtttaat ccggaaattc atcaggccat gacgctgctt
    49621 gaatctgccg atcacgcgcc gaaccacgtc atgatggtga tgcagaaggg ttataccctg
    49681 aacggccgtt tgttgcgccc ggcgatggtc gcggtgtcca aagccaagga ataattgttt
    49741 cccggctttc tccggggagc agcccgcagg cttcttcccg gaatgggccg tgaatctgat
    49801 gtttgttggt ctttctttct ctttctttat tttccttcct tcctttattt ctcttgctgc
    49861 tttctcccgt ttacgcattt tttcctggcg tcatcgcatg gaaggtattt attcgtgtga
    49921 cggtatttat tcgcgtaatg ccgtgccagt cgttttttgt ttatattttg ttaatcttta
    49981 tgtattaaaa cgagtgtcgt ttgtcggttg aatgcatcat tatcataacc tatcagagca
    50041 atcatcactt ccattctaaa tgcacttgat aatcattatc gactctgcga aggtaataaa
    50101 cagtttcgaa ggtaataaac cattgcgacg gtaataaaac cattgcgaag ctaataaaaa
    50161 atagtgttag aagggttact catatgccgg ggagtcgtgt agtggagtca gtcagccgta
    50221 cgtcgaggaa gctcaagctt tcactgatgg ggccggcctt tatcgcggcg atcggttata
    50281 tcgatcccgg taatttcgcc accaatattc agtcgggcgc agcctacgga tatcagttgc
    50341 tgtgggtggt ggtgtgggcc aacctgatgg cgatgttgat tcaattactc tccgctaaac
    50401 tggggatcgc taccggcaag aatctggcgg agcatattcg cgatcgtttg ccgaaacccg
    50461 cggtctgggc ctactgggtg caggctgaaa ttatcgctat ggcgaccgac ctggcggagt
    50521 tcattggcgc ggcgatcggc tttaagctat tgctcggcgt gtcgctgctg gaaggcgcga
    50581 tcctcaccgg gattgctact tttctcatcc tgatgttgca gcaacgcggg caaaaaccgc
    50641 tggagatggt gatcggcggg ttgctgttgt ttgtggcggc ggcctatatt gtcgaactga
    50701 ttttctctag cccggaactg gcgtcgctgg cgaaaggcat ggcagtgccg agcctgccca
    50761 attccgatgc ggtgctgctg gccgccggcg tgctgggtgc aactattatg ccgcacgtga
    50821 tttatctgca ttcgtcgctg acgcagcaac aaagcaacat cacccgcgcc gagcgctatt
    50881 ccgccaccaa ggtggatgtc gcggtggcga tgaccatcgc cgggtttgtg aatttggcga
    50941 tgatggcgac ggcggcggcg gcgtttcact tcagcggcaa cacctcgatt gccgagctgg
    51001 atcaggcgta tctgacgctg aaacccttgc tggggcaagc ggcggcgacg attttcggcc
    51061 tgagtctggt ggtggcgggg ctgtcgtcca cggtggtggg gacgctggcc ggtcaggtgg
    51121 tgatgcaggg gtttgtgcgc tttcatattc cgctgtgggt tcgccgcgtg gtgaccatgt
    51181 tgccgtcctt catcgtgatt ctgtccggta tgaacccgac ccgggtgctg gtgttaagcc
    51241 aggtgctgtt gagtttcggt attgcgttgg cgttgattcc gctgctggtt tttaccggcg
    51301 accgcgaatt gatggggggg ctggtgaata gccgtcgggt acagaatatt ggcaaggtga
    51361 tcgtctgtat ggttatcgcg ctcaatctgt atctggtgct ggatacgctg ctgggttaac
    51421 gcgctcgcct gttctttacg acgcctccgc cgggttatgg tcgggggcgt ttgctttttc
    51481 tgcttacgac tattctgctt tcatcttacg atcacgtgca ttccggcaag ctccgtccta
    51541 ttatctggga ctgatttttt gatacagaga ttcaatgatg tcgtcgccca ttactattct
    51601 tgataagcaa ctgttatccg atcactggtt tgtgctgcat aaatatgtgt tcgatttgaa
    51661 acgtaagaat ggcggcatag tgcgccagat gcgggaagtg tatgaccgcg gcaacggcgc
    51721 cgccatcctg ctgtacaacc gtgttcgggg gaccgtcgtg ctgacgagac aattccgaat
    51781 gccgacttac ctgaatggca atgaaagcgg aatgttgctg gaggcgtgcg ccggtttgct
    51841 ggacgatcag tcgccggaac agtgcatccg taatgaggca atcgaagaaa ccggttacca
    51901 gataggcgaa gtggaaaagt tgtttgaagc ctacatgtca ccgggtggtg taaccgagct
    51961 ggtgcatttt tttgccgcgg aatatgacga ttcacagcgt aaaacgaacg gcggcggtgt
    52021 ggatgatgag gatatcgaag tgctggagtt gccgtttaac gacgcgctgg cgatgattaa
    52081 ggacgggcgt atccgtgatg gtaaaaccat catgctgttg cagcacgcgc agattaacgg
    52141 ctggtttgcc aacatgcgct aacggcatat aaagactgta aacatcaagg gggccggtag
    52201 gctcccttgt tgtttgtggc ggagccgtgt tgacaagcga taccctcggt atctggtgat
    52261 atttggccgg gtaaaccgtc gttatggtaa gtgattttca atcttattaa ttaattatat
    52321 taagcgatat tccggcgtgg attttgtaat gcttcatagt ttcgaaaatc acagacacga
    52381 tacactgggc aacctgccac cctactaaca aagcgataag acaaggtaat aaactatgga
    52441 tgaacaactg aagcaaagcg cactggactt ccatcaatat ccggtgccgg gaaaaatcca
    52501 ggtttccccg actaaaccgc tggccacgca gcgcgacctg gcgctggcct attccccggg
    52561 cgttgctgcg ccttgtctgg aaatcgctga agatccgctg gcggcttaca aatataccgc
    52621 gcgcggcaat ctggtggcgg tgatctccaa cggtaccgcc gtgctggggc tgggcaacat
    52681 cggcgcgctg gccggtaagc cggtgatgga aggcaaaggg gtgctgttca agaaattctc
    52741 cggtgtcgat gtgtttgata tcgaagtgga cgagcaggat ccggacaagc tgatcgacgt
    52801 gatcgcggcg ctggagccga cctttggcgg catcaacctg gaagatatca aggcgccgga
    52861 gtgcttctac attgagcaga agctgcgcga gcgcatgaag attccggtat tccacgacga
    52921 ccagcacggc accgccatta tctgtaccgc ggcggtgttg aacggcttgc gcgtggtgga
    52981 aaaacagatt tccgacgtcc ggctagtggt gtccggcgcg ggcgcggcat ccatcgcctg
    53041 cctgaatctg ctggtggcgc tggggctgaa gcatgaaaac atcgtggtgt gtgattcccg
    53101 cggcgttatc tacaaaggcc gtgaagccaa catggcggaa accaaagcgg cgtacgctat
    53161 tgatgataac ggcagccgtt cgctggccga cgccattcca aatgcggaca ttttcctcgg
    53221 ttgttccggt ccgggcgtgc tgacgcagga catggtcaag acgatggcgc cgcgtccgct
    53281 gatcatggcg ctggctaacc cggagccgga aattctgccg ccgctggtga aagcagtgcg
    53341 tccggatgcc atcgtctgca ccggccgttc cgactatccg aaccaggtca acaacgtact
    53401 gtgtttcccg ttcatcttcc gcggcgcgct ggatgtgggc gcgaccacca tcaatgaaga
    53461 gatgaagctg gcctgcgtac acgccattgc cgacctggcg ctggcggagc agagcgaagt
    53521 ggtggcatcc gcttatggcg atcaggatct ctccttcggg ccggaatacc tgatccctaa
    53581 accgttcgat ccgcggctga tcatcaagat cgcgccggcg gtggcgaagg cggcgatggc
    53641 gtccggtgtg gcgacccgcc cgattgaaaa cttcgacgat tacatcgaga aactgacgca
    53701 gttcgtctac aaaaccaacc tgttcatgaa gcctgtcttc tctcaggccc gcacccagcc
    53761 gaaacgcgtg gtgttggcgg aaggggaaga cccgcgcgtg ctgcacgcca cgcaggaact
    53821 ggtgtcgctg gggctggcgt ttccggtatt gatcggccgt ccgggcgtta tcgaaaaacg
    53881 catccagaag ctgggcttgc agattgccat cggcaaggat ttcgaggtgg tgaacaacga
    53941 atccgacccg cgcttcaaag cctactggac cgaatatttt gagatgatga aacgtcgcgg
    54001 cgtgtctcaa gagcaggcgc aacgcgacat gcgcggcaac ccgacgttga tcggctccat
    54061 catggttcac cgcggcgaag cggatgcgat gatctgcggt acggtcggta actatgaaga
    54121 gcacttcagc gtggtagaga aagtgttcgg ctatcgtgat ggcgtgcatg tggcgggcgc
    54181 gatgaacgcg ttgctgttgc cgagcggcaa tacctttatc gccgatacct acgtcaaccc
    54241 ggacccgacg tcggaacagc tggcggagat caccctgatg gcggccagca ccgtgcgccg
    54301 tttcggtatc gaacccaaag tggcattgct gtcgcattcc agtttcggca cgtctgattc
    54361 gccgacggcg aagaaaatgc gcgccacgct ggaacgggtg aacaagctgg cgccggagct
    54421 gcaaatcgac ggcgaaatgc acggcgacgc cgcgctggtg gaggctatcc gtcgtgagca
    54481 gatgccgaac agcccgctga aaggcgcggc caatatcctg atcatgccga acatggaagc
    54541 cgcccgcatc agctacaacc tgctgcgcgt gtcttcctcc gaaggcgtga ccgtcgggcc
    54601 ggtgctgatg ggcgttgcca agccggtaca cattctgacg ccgatcgcct ccgtgcgccg
    54661 tatcgtcaac atggtcgcgc tggcggtggt ggaagcacag accgagctgc tgtaatccgg
    54721 cagactgctg acaacgaaaa gaccaaaccg gcagattacc ctgccggttt ttttacgcct
    54781 gctggcgcag ccatttctcc agttcgttag cgaactgctg gcggtcgcgc tgatttaatg
    54841 cagccgggcc gccggtttgt accccgctgg cgcgcagcgt atccatgaaa tcccgcatcg
    54901 ttagccgctc gcggatggta tccggcgtgt aacgttcgcc gcgcgggttg agcgcgaccg
    54961 cctgtttttc cagcacttcg gccgccagcg ggatatccgc ggtgatcacc agatcgcccg
    55021 gctgaacgcg gcgcacgatt tcgttatccg ccacatcgaa tccggcggcg acgcgcaaac
    55081 tgtgaatgtg cggcgaaggc ggcgttttaa gcggctggtt ggcgaccagc gtcaggcgcg
    55141 tcgcggtgcg atcggcggcg cgatagagca cgtctttaat cacattggga caggcgtcgg
    55201 cgtccaccca gatggcggtc atccgcgtgc tcccgacggc gtattcaggc cgagccagtc
    55261 gcgagcgggc aggaagtcgc ggtacagcgc cgcttccggg ctgtccggct ccggttggta
    55321 ctggtattcc cagcgcacca gcggcggcag cgacatcagg atcgactcag tgcgcccgcc
    55381 gctttgcagg ccgaacagcg tgccccggtc ccacaccagg ttgaattcta catagcgccc
    55441 gcggcgataa agctggaact ggcgctcccg ctcgccccac ggaatgtctt tgcggcgatt
    55501 gacgatcggc aaataggcgt gccggaaacc ttcgcccacc gcgcgcatga aggcaaagct
    55561 ggcgtcgaaa tccggtgtgt tgaggtcgtc gaagaacaag ccgccaacac cgcgcgcttc
    55621 gttgcggtgt ttgaggacga agtagtcgtc gcaccactgc ttgtaacgcg ggtagacgtc
    55681 gtcgccgaac ggtttacaca aatcgaacgc ggtctgatgc cagtgaacgg cgtcctcttc
    55741 aaaaccgtag tacggggtga gatcgaaacc accgccgaac caccataccg ccggttcgcc
    55801 cggtttttcg gcgatgaaaa agcggatgtt ggcatggctg gtcgggacat acggattcag
    55861 cggatggaca accagcgaaa cgcccatcgc ctgaaaactg cgtccggcca gttccggacg
    55921 gtgggtgctg gccgacggcg gcagcgaggt gccggaaacg tgagagaaat tcactccggc
    55981 ctgctcaaat acctgcccct gacgcagaac gcggctgcgt ccgccgccgc cggaggcatg
    56041 ctgccaggcg tcttcaataa aggtggcggt gccatcggtt agttcaaact gtcggcacag
    56101 gttgtcctgt aacgtgagca aaaagtgctt gatcgcgttg atatcaggtg agctcatagt
    56161 gtcccttatg atgatgttga aaggcgattg ggcttattcc ctgggtttat tagtcctagt
    56221 atatcggaat tcggcaggcc gcctatcgcc ggctaatgcc gtcggcgtga attggcgcca
    56281 tt
//
