# Supplementary material for: May the Phage be With You? Prophage-Like Elements in the Genomes of Soft Rot Pectobacteriaceae: Pectobacterium spp. and Dickeya spp
Source: Front Microbiol. 2019 Feb 14;10:138. doi: 10.3389/fmicb.2019.00138 (PMC6385640; doi:10.3389/fmicb.2019.00138)
Supplement: Supplementary file 2 [file Data_Sheet_2.ZIP › Supplementary_prophagesGENBANK_files/Genbank FILES _SRP_prophages/phiDpa1.gb]

LOCUS       Exported               36414 bp ds-DNA     linear   UNK 02-AUG-2018
DEFINITION  phiDpa1.
ACCESSION   .
VERSION     .
KEYWORDS    .
SOURCE      phiDpa1
  ORGANISM  phiDpa1
REFERENCE   1  (bases 1 to 36414)
  AUTHORS   .
  TITLE     Direct Submission
  JOURNAL   Exported Aug 2, 2018 from SnapGene Viewer 4.2.3
            http://www.snapgene.com
FEATURES             Location/Qualifiers
     source          1..36414
                     /organism="prophage phiDpa1"
                     /mol_type="genomic DNA"
                     /note="/genome_id=6666666.356833"
                     /note="/genome_md5="
                     /note="/project=robertczajkowski_6666666"
                     /db_xref="taxon:6666666"
     CDS             2..811
                     /codon_start=1
                     /product="Ferredoxin--NADP(+) reductase (EC 1.18.1.2)"
                     /EC_number="1.18.1.2"
                     /label=Ferredoxin--NADP
                     /db_xref="SEED:fig|6666666.356833.peg.1"
                     /db_xref="GO:0004324"
                     /translation="MVNEWRIVTSALRRHRKQEHDTMAEWVTGKVIEVEHWTENLFSLR
                     LEAPIAPFTAGQFAKLALERDGERVQRAYSYVNAPSNNRLEFYLVAVPDGQLSPYLHRC
                     QPGDEVLVTQEAAGFFVLEEVPDCDTLWMLATGTAIGPYLSILQEGRDLARFQHIVLVH
                     AARYARDLSYLPLMQQLQQRYGDKLRLQTIVSRETAPGSLTGRVPALIASGELESAVGL
                     PLDQTSHVMLCGNPQMVRDTQQLLKETRQMSKHLRRRPGHITSEHYW"
     CDS             complement(817..1182)
                     /codon_start=1
                     /product="conserved membrane protein"
                     /label=conserved membrane protein
                     /db_xref="SEED:fig|6666666.356833.peg.2"
                     /translation="MWMAIWLALTVGLFMLAGAGLLNTQTAAFMLVALIWPTAAVLVKR
                     LHDRGKSGWWALLLVLAWMLGNGNWYMLPDMGQWVLGRFLPMLIMVMTLLDCGMFAGTV
                     GANRFGKETELLQLRSW"
     CDS             1397..1990
                     /codon_start=1
                     /product="probable exported protein YPO0086"
                     /label=probable exported protein YPO0086
                     /db_xref="SEED:fig|6666666.356833.peg.3"
                     /translation="MKNALPIFYCLATALFGAFPAWGDPLFQQKPPTAAPYLLASAPTF
                     DMNIVQFRTRYNLSNPSLPISEYRVVDTGENSPTLTRAASRINDYLYSSTALEKGTGKI
                     RTMQITWLPRPKDTDESGRRKQAIDYMAALLRTFMPSLTNEQSLKKVDMLLGKGKGHRF
                     YQQTEGALRYVVADNGEKGLTFAVEPIKLTLSDS"
     CDS             2133..2882
                     /codon_start=1
                     /product="Triosephosphate isomerase (EC 5.3.1.1)"
                     /EC_number="5.3.1.1"
                     /label=Triosephosphate isomerase
                     /db_xref="SEED:fig|6666666.356833.peg.4"
                     /db_xref="GO:0004807"
                     /translation="MGNWKLNGSTNMVLELIAGLRKELSTVDGCGVAIAPPALYLDQAK
                     HQLSGSRIALGAQNVDVNLSGAFTGETSAAMLKDLGAKYIIIGHSERRTYHHESDEFIA
                     KKFAVLKETGLIPVLCIGETEAENEAGQTEAVCARQLDAVLNTLGAQAFENTVIAYEPV
                     WAIGTGKSATPAQAQAVHKFIRDHIAKQDAAIAAQVIIQYGGSVNAANAAELFTQPDID
                     GALVGGASLKADAFAVIVKAAAEAKKA"
     CDS             3153..4556
                     /codon_start=1
                     /product="Alkaline phosphatase (EC 3.1.3.1)"
                     /EC_number="3.1.3.1"
                     /label=Alkaline phosphatase
                     /db_xref="SEED:fig|6666666.356833.peg.5"
                     /db_xref="GO:0004035"
                     /translation="MIKKTLISSLVMTLVAANAIAADAAYVRQAAGDITQPGGARRLSA
                     DQTEMLKAALNAKTAKNVILLIGDGMGDSEITVARNYAMGAGGFFKGIDALPLTGQYTH
                     YSLDKKTRKPDYVTDSAASATAWSSGVKTYNGALGVDVDGKDHKTLLEIAKAAGKATGN
                     VSTAELEDATPAAMISHVTSRKCYGPEKTSQQCATNAQENGGRGSIAEQLLVARADVTL
                     GGGAATFKEVAKAGKYQGKTLLEQAQALGYNLVTDLDSLSAVNVASQNKPVLGLFADGN
                     MPVRWQGPKASYHGNLDKPVITCEPNAQRTAATPTLAQMTDKAIQLLSKNKNGFFLQVE
                     GASIDKQDHAANPCGQIGETVDLDEAVQKALEFARRDGNTLVIVTADHAHSSQIIENGA
                     KAPGLTQALNTKDNAVMTISYGNSEEESQGHTGTQLRIAAYGPHAANVVGLTDQTDLFY
                     TMKSAMGLK"
     CDS             complement(4648..5745)
                     /codon_start=1
                     /product="Agmatine deiminase (EC 3.5.3.12)"
                     /EC_number="3.5.3.12"
                     /label=Agmatine deiminase
                     /db_xref="SEED:fig|6666666.356833.peg.6"
                     /db_xref="GO:0047632"
                     /translation="MSELTTPLQDGFAMPAEWAPHEAVWMLWPYRRDNWRSQGDVIPAQ
                     RIFAAVAAAIAQTTPVIMGVPRDQMTLAKSVMPAGVTLVEMESDDAWMRDTGPTVVLNE
                     AGERRGVDWRFNAWGGALGGLYQDWRRDEQVAAQVLAYHGDARYAAPLILEGGSIHTDG
                     EGTLLTTAECLLNPNRNPHLNQAQIEQLLRDYLGVSSFIWLEEGVYNDETDGHIDNMCC
                     FVRPGEVALHWTDDETDPQYHRSQAAYRVLSQARDAKGRALNIWKLPAPGPLYATPEET
                     AGVDEGNAIERNAGSRLAGSYVNFLISNRQIIYPLLDTRTDADAHALLQQMFPDYLITG
                     VPAREILLGGGNIHCITQQIPSALR"
     CDS             complement(5749..6633)
                     /codon_start=1
                     /product="N-carbamoylputrescine amidase (3.5.1.53) / 
                     Aliphatic amidase AmiE (EC 3.5.1.4)"
                     /EC_number="3.5.1.4"
                     /label=N-carbamoylputrescine amidase
                     /db_xref="SEED:fig|6666666.356833.peg.7"
                     /translation="MTKVTVAATQMACTWDLPKNIENAEKLVRQAHAQGAQIILIQELF
                     AAPYFCIDQSPEHYALAQDLETSALIKHFAALAKALEVVLPLSFFERANNAYYNSLVMI
                     DADGSVLDVYRKTHIPNGPAYQEKQFFIPGDTGFKVWQTRYAKVGVGICWDQWFPETAR
                     CLALKGAELIFYPTAIGSEPAYPDIDSQPHWTRVQQGHAAANLVPVIASNRIGTEASKY
                     IDGLEMTFYGSSFIADQTGALVAQADKTAETVLVHEFDLDAIAAQRASWGLFRDRRPDM
                     YGVIGTSDGKTWR"
     CDS             complement(6855..6974)
                     /codon_start=1
                     /product="hypothetical protein"
                     /label=hypothetical protein
                     /db_xref="SEED:fig|6666666.356833.peg.8"
                     /translation="MRARPAMKSRSQGDVANVKHAIPPWAGFVINASTNTDQP"
     CDS             complement(6987..7949)
                     /codon_start=1
                     /product="6-phosphofructokinase (EC 2.7.1.11)"
                     /EC_number="2.7.1.11"
                     /label=6-phosphofructokinase
                     /db_xref="SEED:fig|6666666.356833.peg.9"
                     /db_xref="GO:0003872"
                     /translation="MINRIGVLTSGGDAPGMNAAIRGVVRAALTEGLEVFGIYDGYLGL
                     YEDRMKQLDRYSVSDVINRGGTFLGSARFPAFREESVRQVCVENMKRRGLDALVVIGGD
                     GSYMGAKRLTEMGFPCIGLPGTIDNDVAGTDYTIGYFTALETVVEAIDRLRDTSSSHQR
                     ISIVEVMGRHCGDLTLAAAIAGGCEFIVVPEVDFKKEDLVEEIKAGIAKGKKHAIVAIT
                     ELMCDVADLAHYIETETGRETRATVLGHIQRGGSPVAYDRILASRMGAYSIELLQQGYG
                     GRCVGIQNEKLVHHDIIDAIENMKRPFRGDWLDTAKKLF"
     CDS             complement(8159..9055)
                     /codon_start=1
                     /product="Cobalt-zinc-cadmium resistance protein"
                     /label=Cobalt-zinc-cadmium resistance protein
                     /db_xref="SEED:fig|6666666.356833.peg.10"
                     /db_xref="GO:0006812"
                     /db_xref="GO:0008324"
                     /db_xref="GO:0016020"
                     /translation="MNYHYARLVTMAAFLATATALFLFGMKVYAWWYTGSVSLLASLVD
                     SLVDIAASLVNLLVVRYSLQPADTEHTFGHGKAESLAALAQSMFISGSALFLLLNGVQR
                     LSTPQPLNGPELGMWITVFALVITILLVSFQRWVIRKTQSQAVRADMLHYQSDVLMNGA
                     ILVALFLSWRGIGWADAVFALGIGVYILSSALRMAYDAIQSLLDRALPDEERQEITRMI
                     ASWPGVNGAHQLRTRRSGPTRFIQLHLEMDDQLPLIESHSIADALEQALLKRFPGSDVI
                     IHQDPISIVPLEQRGRW"
     CDS             complement(9164..9640)
                     /codon_start=1
                     /product="hypothetical protein"
                     /label=hypothetical protein
                     /db_xref="SEED:fig|6666666.356833.peg.11"
                     /translation="MNSIKTLRLARAWSQEQLAELSSLSVRTIQRIENGERASLETLSA
                     IAAAFGVNVAELMTEESEQTVSGESLEQRIQDARRQVRQESRFWRSLILMVLVSVVLFI
                     VNQMTGSGHRWFFWVPLIWGGLVVLKGVKIFWLRGRMSRWEQERLQKLLRQRHE"
     CDS             complement(9627..9749)
                     /codon_start=1
                     /product="hypothetical protein"
                     /label=hypothetical protein
                     /db_xref="SEED:fig|6666666.356833.peg.12"
                     /translation="MPVGLLSCRGWEGWHKLASFFTAVFHHCFSQQQENEHEFD"
     CDS             9890..10345
                     /codon_start=1
                     /product="Nudix hydrolase family protein"
                     /label=Nudix hydrolase family protein
                     /db_xref="SEED:fig|6666666.356833.peg.13"
                     /translation="MRKRPASRFLVINAQLHVLLFRFEHKDDAMAGRAYWATPGGALEA
                     GESFTQAAIRELWEETGLNITDPGEEIAQREFVMMMPNGKEVLADERYFIIRIQYHDLD
                     CSQWTEHEKKIMRRYHWWGMDELRQTQETVYPDNLPALLEPYLSITR"
     CDS             complement(10415..11911)
                     /codon_start=1
                     /product="Tail fiber protein"
                     /label=Tail fiber protein
                     /db_xref="SEED:fig|6666666.356833.peg.14"
                     /translation="MTTKYIALLTQVGENKLANATALGKQLEIARMGVGDGGGSLPTPS
                     TTQTTLINEKRRAALNSLSVDSANPNQIIAEQVIPEDEGGWWIREIGLYDNDGNLIAVA
                     NCPETYKPLLQEGSGRVQTVRMILIVSSTDAVTLKIDPSVVLATRKYVDDSAVVVKAYA
                     DDAMAKHLADANPHKQYALLASPALTGTPTAPTAAAGANTTQLATTAFVSTATANHVAA
                     ANPHSQYALLASPALTGTPTAPTAAAGANTTQLATTAFVSTATANHVAAANPHPQYAPL
                     ASPALTGTPTAPTAAAGANTTQLATTAFVSTATANLSASTASGLAQKMNIADVVGIPLP
                     WPQATAPTGWLKCNGQSFDKALYPKLATVYPSGVLPDLRGEFIRGWDDGRGVDAGRAIL
                     TAQNPTYLRTGMMDYNGSDVDNIGVYIGMGYAEADTAAKSISAPAGAFRAPNNIDLTEQ
                     ASRDNGVNGTASNTVYASEGSVWVSTRPRNIAFNYIVRAA"
     CDS             12023..12142
                     /codon_start=1
                     /product="hypothetical protein"
                     /label=hypothetical protein
                     /db_xref="SEED:fig|6666666.356833.peg.15"
                     /translation="MLTVIRNGASWTLLPAYNNIAAQHQSQQIEKKILIRDKH"
     CDS             complement(12175..12798)
                     /codon_start=1
                     /product="Tail fiber assembly protein"
                     /label=Tail fiber assembly protein
                     /db_xref="SEED:fig|6666666.356833.peg.16"
                     /translation="MTKKYAITAQAAELGANGLTTVPGWLVVYFADPDTHEYLHAGYEY
                     LMQGTGLPAGGYLDAPSLPPDGLGLRRSDDGLCWVHVPDYRGQLAYNTQTRQPLRVTQM
                     GELPSELTVLAPTSAFDVWRDGRWVTDDAAKINAAIQAAKAEQEKRRRSANDRLNELTY
                     AINLGIATPEEASALSSWQAYLVLLSRVDFGHAPDIVWPTEPGM"
     CDS             complement(12798..14471)
                     /codon_start=1
                     /product="Tail fiber protein"
                     /label=Tail fiber protein
                     /db_xref="SEED:fig|6666666.356833.peg.17"
                     /translation="MTTKYFALLTTTGAALLANATALGKQLSITQMALGDGGGTLPTPD
                     AAQTKLVNERRRAPLNSLSVDTTNTNQIIAEQVIPEDEGGWWIREIGLYDAAGNLIAVA
                     NCPETYKPLLQEGSGRVQTVRMILIVSSTDAVTLKIDPSVVLATRKYVDDSAIVVKAYA
                     DDAMAKHLADANPHKQYAPLASPALTGTPTAPTAAAGASTTQLATTAFVSTATANHVAA
                     ANPHPQYAPLASPEFTGRVKVTADGAGAVLLKAATANAAVGISFQTNLGVQIAQLTYAG
                     TNTQFYSYLGGNSVALIDSGDITIAPKAGQSLKITTPVTVNGDGNQILLQQSTKAPSSG
                     SYIKGLNSDGVFLWTVGRSESNGWLELGGKGSNRIALADSGDVTIAPGTGKTTKITSTA
                     TLTAPAAGDNSTSAITSGWFAAEIAGIPLPWPQATAPTGWLKCNGQSFDKTLYPKLTAA
                     YPSGTLPDLRGEFIRGWDDGRGVDSGRAVLSVQDATWIQPNIESNTAATTIRIDNVDST
                     FNTDEYSAVSNLPSYEHNGSRARSYVRPRNVAFNYIVRAA"
     CDS             complement(14468..15037)
                     /codon_start=1
                     /product="Tail protein I"
                     /label=Tail protein I
                     /db_xref="SEED:fig|6666666.356833.peg.18"
                     /translation="MRNVASSTQHLSEIAVDLDTLWNPDTCPVSFLPYLAWALSVDRWD
                     KRWSEQTKRQVIKAAWRVHRQKGTIAALRRVVEPFGYLIRITEWWQTGGVPGTFRLDIG
                     VQDAGITEETYLELERLIADAKPASRHLLGLAIHLDSRGAAPVIVGQYSGDALTIYPYF
                     PETITTTGADVRGGAVHLSDNVSVNA"
     CDS             complement(15069..15965)
                     /codon_start=1
                     /product="Phage baseplate assembly protein J"
                     /label=Phage baseplate assembly protein J
                     /db_xref="SEED:fig|6666666.356833.peg.19"
                     /translation="MATVDLSQLPQPQIIEELDFEVIFQDVKAVMIAAFPADQQASVTA
                     ALELESEPLTVIAQVIAYREMMLRQRINEGAEACLLSYAVSSDLDNLAANLNTARLTIT
                     EETDTADAIMESDSALRLRAQAAFEGLSVAGPTGAYEYFAKSASGKVADAKAISPSPAV
                     VVVSVLSTEGDGSASADLLATVDAALSADDKRPVGDRLTVQSAEIVRYAITAVLYRYPG
                     PESEPIQQAAQQALTSWLGVQGRIGRDVARSAIMAALHVQGVQRVELLEPAQDMVISDT
                     QAAYCTGLTLTEGGSDE"
     CDS             complement(15952..16320)
                     /codon_start=1
                     /product="Putative phage protein"
                     /label=Putative phage protein
                     /db_xref="SEED:fig|6666666.356833.peg.20"
                     /translation="MTATYTGMNPHGTGTLTDADQLWQSVRDILTTPLASRVMRRDYGS
                     LIPDLLDAPQNAVTRLQLMSAAVIALTRWESRISLNAIDIRYSASGAVAAELSGVITAT
                     MQAASTTLTLRSNSDGNG"
     CDS             complement(16317..16898)
                     /codon_start=1
                     /product="Phage baseplate assembly protein V"
                     /label=Phage baseplate assembly protein V
                     /db_xref="SEED:fig|6666666.356833.peg.21"
                     /translation="MSAELMRLLENVLRVGVVTAVDPETWQVRVKSGELLTDWLRWNTI
                     RAGAFNVWFPPAVGEQVWLGCLGGNPETAVIIGSLFSEAHPAPGNSLKEIVITAPDGAR
                     FRYDAVAGALEATGMKTVNVVAAVSVTLNTPVVECTQHLKARTVEITHGGTLAGNVAHS
                     DGAMTSNGVQVDNHRHGGIQPGGSWTSGTQ"
     CDS             complement(16895..17533)
                     /codon_start=1
                     /product="Tail completion protein S"
                     /label=Tail completion protein S
                     /db_xref="SEED:fig|6666666.356833.peg.22"
                     /translation="MTDKRFHALDQVFDDILSGLSPAGRLKTARQVGQALRRSQQQRIR
                     AQKNPDGSAYATRRRKVLRSQKGMVFVWEGQVRHLKNWHGGRGKYGRTITGFDEDRNAI
                     RTFYRSDIERYIEINTQAIRRTTSKKTPMFQRLCSYRFLNMRADTNGASVGFGGMAARI
                     ARVHQYGERDQIGPGAFARYPVRKLLGISPADEQLIQDSVINSLGSAAT"
     CDS             complement(17530..17988)
                     /codon_start=1
                     /product="Phage tail protein # FIG072132 and FIG003673"
                     /label=Phage tail protein # FIG072132 and FIG003673
                     /db_xref="SEED:fig|6666666.356833.peg.23"
                     /translation="MLKTDSLRVALTASNTWCRANPEAFTVFVEEGGIETTGETPSFLY
                     RYSLVLFVMNFTGDIDDFTLPLMAWLWQNQPDLLLNPQKNREVTFTTLINNDDSADILF
                     EIPVRERVRVTRDDNGTLRAEHLPEPRPRLTGGVWDAVLEDATGETAV"
     CDS             complement(17999..18133)
                     /codon_start=1
                     /product="hypothetical protein"
                     /label=hypothetical protein
                     /db_xref="SEED:fig|6666666.356833.peg.24"
                     /translation="MTWGTVALWSDQLLDALDTCNADKAAINDVYLRRLQRLKDAATP"
     CDS             complement(18102..18539)
                     /codon_start=1
                     /product="hypothetical protein"
                     /label=hypothetical protein
                     /db_xref="SEED:fig|6666666.356833.peg.25"
                     /translation="MKLAATLAVLLVLAVGGVLWQTYQRGIDRAHTEALTDSAQQQREL
                     LNEVRALADDARTVLAQVREREQQRYVEGEERREKMREVMQPDTCANTVVPVAVSDSLQ
                     KRAAAVQRANTARPGTAQPDGTHTDARTENTGDVGHGRALE"
     CDS             complement(18536..19081)
                     /codon_start=1
                     /product="Phage lysin (EC 3.2.1.17) # Phage lysozyme or 
                     muramidase (EC 3.2.1.17)"
                     /EC_number="3.2.1.17"
                     /label=Phage lysin
                     /db_xref="SEED:fig|6666666.356833.peg.26"
                     /translation="MKTAIKRCSIALIVALGVTLSPGALRTSQEAQQKTASWEDCRASP
                     YYCPAGVLTVGIGSTGSVQNRPYGNDEIARRWVNDMQRAENCVNGNFNGAAMPQSAFEA
                     MTDTAFNLGCSGLMWFTNRQGSKQRTTIWKHAQAQEWPAMCERLTDFVNSGGQRSAGLV
                     NRRSDFKAWCLRDLAGVP"
     CDS             complement(19065..19367)
                     /codon_start=1
                     /product="hypothetical protein"
                     /label=hypothetical protein
                     /db_xref="SEED:fig|6666666.356833.peg.27"
                     /translation="MGLNDLQRLNDGVTYGLSVMVTGIGVMTVSEKVALAGLVIGVVTA
                     WRAWLFRRRIERAQRRRNELIEQILQQSERRTLNVSERRAVAILHQGDVDDENRD"
     CDS             complement(19336..19557)
                     /codon_start=1
                     /product="hypothetical protein"
                     /label=hypothetical protein
                     /db_xref="SEED:fig|6666666.356833.peg.28"
                     /translation="MVVWALQGDTVDLLCYRHYGTSAGVTEQVIAANPGLSRQMFLTAG
                     QAVTLPEISRSTEQETGSYGIKRSSAPE"
     CDS             complement(19557..20048)
                     /codon_start=1
                     /product="Phage head completion-stabilization protein"
                     /label=Phage head completion-stabilization protein
                     /db_xref="SEED:fig|6666666.356833.peg.29"
                     /translation="MSLVAPKRVSDSGDVPEIDDGAAAVSAGEFWPVIVLRDLRLAARI
                     TGGITTTRLMHVTTEAVVHVTDQLASWQQTQQAAGYTALADVPAGQVNGENIKVYRFKR
                     AVYAIARALLLEGYRDVDTTAKGDKATDTFDNQRDDLWRDARWSIADIRGAKRLFAELC
                     "
     CDS             complement(20147..20992)
                     /codon_start=1
                     /product="Phage terminase, endonuclease subunit"
                     /label=Phage terminase, endonuclease subunit
                     /db_xref="SEED:fig|6666666.356833.peg.30"
                     /translation="MAERRGQEDIETEVSRTAHEQILHRLRLHQAALKQVQSDATKAEM
                     KKAMLPEYDGWIDGTLEGDSGRQDEVIVTLMVWAIDCQDSALALKLGRYVVEHGLSLPA
                     DKFRRDAVTVLAEEVSNPVLTLAATDDRADLSGYTAVLDEVAAIVDGKDMPDEVRAKLC
                     KARAFSRRAAVDAQTKADALTLFREAMARNPNAGVKREIATLTRELKKLMPGSSDAPED
                     GAPGDDETTMETAAGETPPAASADAAQPAVKKAAVRNTTARKTTRPTGKSKAARQSAKR
                     "
     CDS             complement(21071..22126)
                     /codon_start=1
                     /product="Phage major capsid protein #Fam0066"
                     /label=Phage major capsid protein #Fam0066
                     /db_xref="SEED:fig|6666666.356833.peg.31"
                     /translation="MENTTRNLFEQYISRQAQLNGVQPNAVAMTFSVEPAIQQRMEQAA
                     QESDDFLEQINVFGVKDQEGQKILIGSKGPIASTNNSSDGTSRRNPTDNHSKEPNSYHC
                     RKVNYDSALSYPQLDAWASRPNFQALISQANARQIGLDRIMIGFNGATYAEKSDRRANP
                     LLQDCGVGWLQKIRNDTAHRIIKNVTLTARDEDNKIVAKGTYGNLDTAVFDAKNSLLDP
                     WHRKAPDLVVIMASDLLTSSNFPRLNALSQSNPNSELIAGQLIISQERVGGLPTFLAPY
                     FPSNAVLITSFKNLSVYYQLGALRRSIVEEPQYNRIATYQSSNDDFVVEDYGKVALIDG
                     IQFAQAAGDSE"
     CDS             complement(22152..22991)
                     /codon_start=1
                     /product="Phage capsid scaffolding protein # Fam Scf032"
                     /label=Phage capsid scaffolding protein # Fam Scf032
                     /db_xref="SEED:fig|6666666.356833.peg.32"
                     /translation="MSGTAKPTRKKFRVAVSGSTVDGREIGRDHLYAMAESYNPQVYGA
                     RVNVEHILSPYPGSDFSAMGDVIALSAEDITDGPLKGRAALYAEIEPTERMKQLTGEGK
                     KIYSSIEIDPQFAATGKPYLRGLAMTDTPASLGTDRLKFAAQQRAQVQAFNNLPGEPVM
                     FTEAMEAELVELSEQRSDEGKQWFSRVMGIIGKGRKSEGEQFAQVREAVENVAQSHADL
                     LDSFNTLKTQQQQDNRTIQTLTRELAALTQKLATQDNSYSQRPAASGGNSGAQLADF"
     CDS             23150..24877
                     /codon_start=1
                     /product="Phage terminase, ATPase subunit"
                     /label=Phage terminase, ATPase subunit
                     /db_xref="SEED:fig|6666666.356833.peg.33"
                     /translation="MIQDAFVRQRAKQLYWQGYPPAEISRLMGINQNTVYAWKKRDEWD
                     ETPPIQRVTHSIDARLCQLAQKPTKTGGDLKEMDALTRQLKTLNDGQPGNAAGGKKPRK
                     RKVKNHFTDEQIAALRTNILDSLAWHQNGWYAQQDQRNRMILKSRQIGATWYFAREALL
                     RALRDDVAYPYQRHQIFLSASRRQAHQFRGFIQKVAEEVDVELKGGDKIVLSNGAELHF
                     LGTSAATAQSYTGNLYFDEFFWVSNFANLRKVAGAMATLKGLTRTYFSTPSSETHEAYP
                     FWTGARWNEKRSKAQKVAFDVSWKALNSGLLCPDKTWRQIVTLQDVIDHGWQYTDLEEI
                     RDENSPDEYNNLYGCEFVRDGESAFNLNLLFSCGADGYDEWPDWKPFASRPMADRGIWI
                     GYDANGSSGNGDSGAISVVVPPLVAGGKFRTIETQQIRGLEFEEQAKVIEALTFKYNVQ
                     HIAIDGTGIGEAVYQIVKKFFPAAVCFLMSVSSKRALVLKMLQVIRAGRWEYDRSEQAL
                     INAFNAVRRVKTPGGIMTYDTDRARGSNHGDLAWATMLAVINEPLGQEQGGGGFAMEF"
     CDS             24877..25929
                     /codon_start=1
                     /product="Phage-related capsid packaging protein"
                     /label=Phage-related capsid packaging protein
                     /db_xref="SEED:fig|6666666.356833.peg.34"
                     /translation="MKRKYKPGARPAMTPGQPDMAATLKSDPGLSAFTFDGPYPVRDGH
                     DLLDNMYCADNGRYYDTPVDWYGLARAFGSASWHQSALYFKRNALTGCFIPHPLLSRQA
                     FSAFVLDWFVFGNGYLERRVNRLGSVLSLRHVPAKYTRRGSDLNTYWFIRQWKDEHAFD
                     TDSVCHVINPDINQEIYGMPEYMGALLSASLSHSADMFRKLYYDNGSHAGCIIYIGASQ
                     VDTESMDNVKKTLKEARGKGAFKNLLLHAPGGGEKGVQIIPFSQISAKDEFLNIKSVTR
                     DDILAAHRVPPQLMGAMPEGNGSFGDVEKAARVFAINELMPVMEALKHVNDWLGMEVIR
                     FNPYALLKAE"
     CDS             complement(26378..27490)
                     /codon_start=1
                     /product="Transcriptional regulator, XRE family"
                     /label=Transcriptional regulator, XRE family
                     /db_xref="SEED:fig|6666666.356833.peg.35"
                     /translation="MFNGSNLRLARLYHELSLEQVAERVDKTRQYIQRLESGSAVPTPD
                     LANKLAAVLLVMPEFFEVQEQSPVNEEIVHFRKRSSTRMATKWATLAKAELYRRLIEVF
                     DEYLNLPAVRFPEMRVHTQEDIEKAAEKCRTDWGLGFGPIDNMTRLAEKLGAFVTSFDS
                     VSDDVDALSVPLSRPFIVRNTAKKSPCRQRFDIAHEVAHLILHEGISTGDRVTESQANR
                     FASALLLPRSAMAKYFPRPIGGRIDWQGLSQFKLTWKVSKAAIIYRAHQLSLLTDAQYK
                     TAFFGLKRKGEAIDEKEDYLIPNEKPELFHKALRFLLTDLSVDIESLAQRLCITPAMLA
                     GLASDNTLDFVPEITTENVVSMSAYRMRTA"
     CDS             complement(27504..28097)
                     /codon_start=1
                     /product="hypothetical protein"
                     /label=hypothetical protein
                     /db_xref="SEED:fig|6666666.356833.peg.36"
                     /translation="MQDYPFPWTFHPQLTEERLSIIAEALLKVQEDTHELLSSSLDDNY
                     TRATCTFGRQKNRIVKLCMSKKYDWLGLSNPNNDYTITIGGIPIRSFSDDPTNPKKPNF
                     FRKNSVDQLFASEDTIPTIWRFVVEKPEFEGEGGRVHFAGYNALEEMLSLWTYGEERVT
                     VLHSTDDTPPAPVKIELDDISASVPEKEKKSDNE"
     CDS             complement(28277..30331)
                     /codon_start=1
                     /product="Phage replication protein # Replication gene A 
                     protein"
                     /label=Phage replication protein # Replication gene A
                     /db_xref="SEED:fig|6666666.356833.peg.37"
                     /translation="MTDLQILEHNGVYHAVREWQREQFSPGEPAGLSYVERSLWHLNKV
                     DHEWRQQYLAGMPDYLAKYFGQRYEKLFKSDEHKGRRRANTFLLRTLGKSVLPRLRTVT
                     ERYQTQQRAAGDLPFPFGDDLEKLPVYDRDNIRALSQRVADFMAASLRDYTENRIRNTG
                     SLTDRHITLLSFRHLGLLTLQAGTQPAYWAQFTKGRHPLSTEKAESGLLRMMSPEWWRA
                     RLKRRRDIQREHMAIAVGQVQKAASPYVSRSTLDEWKEQKRRNREFFKAFDLEDEEGNR
                     VSMDDKVNASNANPAIRRCELMVRMRGFEDLAQEMGCAGEFYTITAPSRYHAVHSGGGF
                     VEQWSGASPRDTQKCLCGVWARIRAELSREEISVFGFRVVEPHHDGTPHWHLLLFMRPE
                     HIEQVRDIMAYHARREDADELNSEKAQKARFHYEPIDPEKGSATGYIAKYISKNIDGYA
                     LDGEADEETGENLRDMAKAVSAWASRWRIRQFQQIGGAPVTVYRELRRLGDKQLDNAAM
                     DAVLAAADVGDWAAYTQAQGGPLVSRDALVVRLSYEITERANQYAEDVQKVQGVYSPLL
                     GERSAIVTRTVQWRIVPKQAAASAGAGVSGGPAAAWSSVNNCTPGLRRRLSELLRLRGF
                     PPDPGLVDVLIRGCSLAISEGRALKMVNGRLEEVGQTGDCELWPGWNWG"
     CDS             complement(30328..31554)
                     /codon_start=1
                     /product="Phage-related protein"
                     /label=Phage-related protein
                     /db_xref="SEED:fig|6666666.356833.peg.38"
                     /translation="MIDSRCFQNDTINVISVSGGKDSLAQWLLAIEHGVQHTAVFADTG
                     HEHPQTIEYLGYLESKLGPIKRVKADFSRQIEQKRKFITNNWYQGLITDLMVDRFEGRW
                     ALASGFRVQKIMLDEDDDTYFDEYLLYPNGRRERFVWPESVPDDRYNTAVLNGFQWIPS
                     VKGLNQQDAEVEAAARVKSALDNLRPTGNPFLDLCMLKGRFPSTKARFCTFELKHEPVR
                     TQVVLPALDEYDEVISWQGVRAQESPARAGLPVWEEDADNTPGLHVYRPILEWKHEDVF
                     AIAKRHGIKPNPLYQQGCSRVGCMPCIHARKSELAEIFSRWPEEIKRVAEWERLVAACS
                     RRGNSTFFPSTHDPRRAEQRIDIITVDEYGIESYRDWAMTTRGGAQFDLLAEANDKSVC
                     SSVYAGVCE"
     CDS             complement(31554..32510)
                     /codon_start=1
                     /product="Methyl-directed repair DNA adenine methylase (EC 
                     2.1.1.72)"
                     /EC_number="2.1.1.72"
                     /label=Methyl-directed repair DNA adenine methylase
                     /db_xref="SEED:fig|6666666.356833.peg.39"
                     /db_xref="GO:0009007"
                     /translation="MSIIATPLKWVGSKARVMDILREHLPVGDRLVEPFAGSCAVMMNT
                     DYPEYLIADINPDLINLYQVLKEDVKDFIDTAEGLFRTANTAESYYRFRQVFNRSKENR
                     ITSAALFLYLNRHGYRGVCRYNRNGGFNVPYGHYASPYFPLAEIQAFAEKARRAKFICA
                     AFGETLQLIRPGDVVYCDPPYIPQTPTASFTSYHTDGFTHNDQYDLCSELSRLAERGIP
                     VIASNSDTHHARSLYHRFDICRFTAPRSVGVAAGEGKQAGEIIAKRLPVSAARSLSKVC
                     DGCGYEGGRHCPDCGLGIGNAIHHVMAASGALNAEPF"
     CDS             complement(32507..32731)
                     /codon_start=1
                     /product="Phage protein"
                     /label=Phage protein
                     /db_xref="SEED:fig|6666666.356833.peg.40"
                     /translation="MDSMDMAQEREAFIRETQIQQARQQSGCAVSAFVCENCDAPIPEA
                     RRVAVPGVCLCVYCQGDAELKNKHYRGAL"
     CDS             complement(32731..32961)
                     /codon_start=1
                     /product="hypothetical protein"
                     /label=hypothetical protein
                     /db_xref="SEED:fig|6666666.356833.peg.41"
                     /translation="MKNAEVKTMTVAADGALIELLNKARLEERKDQHLSFSLRLAALAI
                     RAQQRDLSAAELVELMRQESERFEYSAQGLS"
     CDS             complement(33033..33362)
                     /codon_start=1
                     /product="hypothetical protein"
                     /label=hypothetical protein
                     /db_xref="SEED:fig|6666666.356833.peg.42"
                     /translation="MSQSVDHQKWIQRCRDIVFKGESRAQSFWERAALETREIILFSAK
                     PKLKSRHVNYSWHQFTAEERAAIWGAIKRIRAICDETALFGPDDFLKTSNQNGTPNKPN
                     QSPIH"
     CDS             complement(33375..33530)
                     /codon_start=1
                     /product="hypothetical protein"
                     /label=hypothetical protein
                     /db_xref="SEED:fig|6666666.356833.peg.43"
                     /translation="MQKPISIAPFLWQQQTESRIKPEIRHGEGKQGIIIRPDGRRWNPP
                     KGAFNR"
     CDS             complement(33644..33850)
                     /codon_start=1
                     /product="hypothetical protein"
                     /label=hypothetical protein
                     /db_xref="SEED:fig|6666666.356833.peg.44"
                     /translation="MVKKEFAVIRLSKHTSIYRGFSVVEYPRTITNSIKRYRVSREGQS
                     YGLFDALALATGYIDSLHNSVSQ"
     CDS             complement(33861..34133)
                     /codon_start=1
                     /product="Cox"
                     /label=Cox
                     /db_xref="SEED:fig|6666666.356833.peg.45"
                     /translation="MSERVYEVRYPVDAVPYQKFAELIGKSEAAVKGMVDNGKLPLIPW
                     VNPENPNPRRGENWVYIPEFNRAMRDAFMNRPKEQRDAWLLWLGL"
     CDS             34205..34726
                     /codon_start=1
                     /product="hypothetical protein"
                     /label=hypothetical protein
                     /db_xref="SEED:fig|6666666.356833.peg.46"
                     /translation="MVGLLCSHQSTTDKGVYFMDLNLTACFRVYEKTFNNIATALKINN
                     PDNTYLCAPLTLRTLVIFKINLILFEYRENLDKKREVLIGRNALTHYLFNKKGITFTEA
                     KNISLNDAVIILWNEINSYKIPENIINHIRNHSDNYHHTDNDISKFKKDYPSYIDEEWD
                     PNYADEELRK"
     CDS             complement(34695..34910)
                     /codon_start=1
                     /product="hypothetical protein"
                     /label=hypothetical protein
                     /db_xref="SEED:fig|6666666.356833.peg.47"
                     /translation="MEGENKVGPSIMRGDLTDDELIEFLLTFIKKLEARESLKERPEKL
                     RASADSAERELDELNEFISSVLHQHN"
     CDS             35224..35364
                     /codon_start=1
                     /product="C protein"
                     /label=C protein
                     /db_xref="SEED:fig|6666666.356833.peg.48"
                     /translation="MHPTFQKYTLWLMTDKTAPEAGQIAPALAHIGPEETKSHQSNQNI
                     G"
     CDS             35431..36414
                     /codon_start=1
                     /product="Phage integrase"
                     /label=Phage integrase
                     /db_xref="SEED:fig|6666666.356833.peg.49"
                     /translation="MAIKKLDDGRYEVDIRPIGRNGKRIRRRFEKKTEAVAFERYTLSR
                     ADKKEWQHGYGVEHRQLSELVELWWLYYGQNLKNGLIEKRHLKRTAAQMDDPEICRINK
                     RSILEFRTRRLYDGISSSTVNRDIYRLSGMFSALIKLEIYTGENPLKELPPLPEKQPTV
                     TFLTESEIARLLDTMEGDQYRLAVLCLSTGARWGEASTLRAEQVMHNRVTFTETKNGKN
                     RTIPISEEVTRIIKTRETGKLFKVDYSAFCEQIKAVKPDIPKGQASHILRHTFASHFVM
                     NGGNLVALQQILGHASIQQTMTYAHLAPDYLQNAITLNPLRGKIAV"
ORIGIN
        1 tgtggttaat gaatggcgta tcgtaacctc tgcgctacgc agacaccgga aacaggagca
       61 tgacaccatg gcagaatggg tgaccggcaa agtgattgag gttgaacact ggacggaaaa
      121 tttattcagt ctccggctgg aggcgccaat agcgcctttt accgccgggc agtttgccaa
      181 actggcgctg gagcgggatg gtgagcgcgt gcaacgcgcc tattcctacg tcaatgcgcc
      241 gagcaacaac agactggagt tctatctggt tgccgtcccg gatgggcagc tcagcccgta
      301 cctgcatcgc tgtcaaccgg gcgacgaagt gctggtaacg caggaagctg ccgggttttt
      361 cgtactggaa gaagtgccgg attgcgacac gctttggatg ctggccaccg gtaccgccat
      421 cggcccttat ctgtcgattt tgcaggaagg gcgcgacctg gcgcgtttcc agcatattgt
      481 cctggtgcat gccgctcgtt acgctcgcga tctgagctat ctgccgctga tgcaacagtt
      541 gcaacaacgt tacggcgata agctgcggct tcagaccatc gtcagccgcg aaacggcgcc
      601 cggttccctg actggacgtg ttccggcgtt gatcgccagc ggcgaactgg aatccgccgt
      661 cggattgccg ctcgaccaaa ccagccacgt catgctgtgc ggcaacccgc aaatggtgcg
      721 cgacacccag caattactga aagaaacgcg ccagatgagc aagcacctgc gccgccgccc
      781 cggtcatatc accagtgagc attactggta aggcgcttac caggaacgga gctgcaacag
      841 ctccgtctcc ttaccaaaac gattagcccc caccgtaccg gcaaacatac cgcaatccag
      901 cagggtcatg accataatca gcatcggcaa aaaacgcccc agcacccact ggcccatgtc
      961 cggcaacatg taccaattgc cgttgcccag catccaggcc agtaccagca acagtgccca
     1021 ccagccgctt ttgccgcgat cgtgcagcct tttcaccagt accgctgccg tcggccatat
     1081 cagcgccacc agcatgaatg ctgcggtctg cgtattcagc aatcctgcgc ccgccagcat
     1141 aaacaacccg accgtcaacg ccagccagat agccatccac aaccagaaat ctcgccgacc
     1201 ggtacggcct cgaaaggaaa aacaccattg ctgtatcgtc atcagttttt attcctgcca
     1261 ccgctttttg gtcacgattt taccttaagc aaaggattta cccgcttttt ttatccgttt
     1321 tttgacaacc gctcacgaat gccgcttaat cacacagcat atctgtcaca cgactgcgtt
     1381 aagtgatgaa gacgccatga aaaacgcctt gccgatcttt tactgtctcg ccaccgcgct
     1441 gttcggagcc ttcccggcgt ggggcgatcc gttgtttcag caaaaaccgc cgaccgcagc
     1501 gccttatctg ctggccagcg cccccacgtt cgatatgaac atcgtgcaat tccgaactcg
     1561 ctacaacctt agcaacccgt cattaccgat tagcgaatac cgggtagtgg ataccggcga
     1621 aaactccccg accctgaccc gagccgccag ccgcatcaac gattacctct actcatccac
     1681 tgcgttggaa aaaggcaccg gaaaaatcag aacgatgcag atcacctggt tgccgcgccc
     1741 caaagatacc gacgaaagcg gccgccgcaa gcaggccatc gactatatgg cggcgttgct
     1801 gcgcaccttc atgccctccc tgactaacga acagagcctg aaaaaggtcg atatgttgct
     1861 gggaaaaggc aaaggccacc gtttctatca gcaaacggaa ggcgcactac gttatgtggt
     1921 ggcagacaat ggtgaaaaag ggctaacttt cgctgttgaa ccgattaagc tcacgctatc
     1981 tgattcgtga tcgaagcagt aattagacac gaaaaacaga gccacagtag ggttcatctt
     2041 ttatactgtc atccagatgg gctgcctgac gcagcccgca ttgactaact cgctattccg
     2101 ctggaggaaa aaagatgcga catcccttag ttatgggcaa ctggaagctg aacggaagca
     2161 ccaacatggt tctcgagctg atcgccgggc tgcgtaaaga gctgagcacg gttgatggct
     2221 gtggtgtcgc cattgcgccg ccggccttgt atctggacca ggccaagcat caactgtcgg
     2281 gcagccgtat cgcgctgggc gcacagaatg tggacgtcaa tctttcaggc gcgtttaccg
     2341 gtgaaacctc tgcggcaatg ttgaaagatc tcggtgccaa atacatcatc atcggccact
     2401 ccgagcgccg gacataccac catgaaagcg atgaattcat tgccaaaaaa tttgccgttc
     2461 tgaaagaaac cggcctgatt ccggtactgt gcatcggtga aaccgaagcc gaaaacgaag
     2521 ccggccagac cgaagccgtc tgcgcccgtc agctggacgc cgtcctgaac acactcggcg
     2581 ctcaggcatt tgaaaatacc gtcattgcct acgaaccggt atgggctatc ggtaccggca
     2641 aatccgccac cccggcgcag gctcaggccg tgcacaaatt cattcgcgat cacatcgcta
     2701 aacaagatgc cgccattgca gcccaggtca tcatccagta cggcggttcc gtcaacgcgg
     2761 ccaacgccgc cgagctgttc acccagccag atatcgacgg cgcgctggtg ggcggcgcat
     2821 cgctgaaagc cgatgccttc gccgtcatcg tgaaagctgc ggcggaagcc aaaaaagcct
     2881 gataccacgc ggcaccggct tggcgggtta aggtgtaacg gaaccgagga ggccatcttc
     2941 tttccgtctc cctttaccag ccgcattgat ggctccactc cggagccatc aatgatttag
     3001 tccatccctc tccaccacga cgagtggcgt tccttctcca ccgccgcgac tatttttagc
     3061 cgttaccctt agattcatca ttctgtcatc tcttgccttt aggtttaccg cccacaacct
     3121 tcgtaacaat tctttaaggc gagtaaaaaa taatgatcaa gaagaccctg atttcctctc
     3181 tggtaatgac actggttgcc gctaatgcca tcgctgccga tgccgcctac gttcgtcagg
     3241 ccgcaggcga tatcactcag ccaggcggcg cacgccgtct cagtgccgat caaactgaaa
     3301 tgctgaaggc ggcgctcaat gccaaaacgg caaaaaacgt cattctgctg attggcgatg
     3361 gcatgggaga ctctgaaatt acggtagccc gcaactatgc aatgggcgcc ggcggttttt
     3421 tcaaaggcat tgacgctttg ccattaaccg gccaatacac ccattactca ctggataaaa
     3481 aaacccgcaa accggattac gtgaccgact ccgctgcgtc cgccacggcc tggtcaagcg
     3541 gtgtgaaaac ctacaacggc gcgctgggcg tggatgttga cggcaaagac cacaaaaccc
     3601 tgctggaaat cgccaaagca gcgggcaaag ccaccggcaa cgtctccacc gccgaattgg
     3661 aagacgctac cccagcagcc atgatctcgc acgtcacttc ccgtaaatgt tacggcccgg
     3721 aaaaaaccag ccaacaatgc gccaccaatg cgcaggaaaa cggcggccgc ggttctattg
     3781 ccgaacaact gctggttgcc cgcgccgacg tcacgctggg cggcggtgcg gcgacattca
     3841 aagaagtggc caaggcaggc aaatatcagg gtaaaacgct gctggaacag gcgcaggcgc
     3901 tgggctataa cctggtgact gatctggaca gccttagcgc agtgaacgtg gccagtcaga
     3961 acaaaccggt gctgggcctg tttgccgacg gcaatatgcc ggtacgctgg caggggccga
     4021 aagcctccta tcacggcaat ctcgacaagc cggttatcac ctgcgagcca aatgcacagc
     4081 gtacagctgc aacgccgaca ctggcacaaa tgacagacaa agccatccaa ttgttgagta
     4141 agaacaaaaa tgggtttttc ctgcaggttg aaggcgcgtc tatcgacaaa caagaccacg
     4201 ccgccaaccc atgcggccag atcggcgaaa cggtagatct ggatgaagcg gttcagaaag
     4261 cgctggaatt tgcccgtcgt gacggcaata cgctggtgat cgtcaccgcc gaccacgcgc
     4321 actccagcca gattatcgag aatggcgcca aagcgccggg tctgacgcag gcgctgaaca
     4381 ccaaagacaa cgccgtcatg accatcagct acggcaattc ggaagaggaa tcacagggtc
     4441 ataccggcac tcagctacgt atcgcggctt acggcccgca cgccgccaac gtggtagggc
     4501 tgactgacca gactgacctg ttctacacca tgaaaagcgc catgggcctg aaataaccct
     4561 cgggcagcca tccctacacc attgtcctaa aacaacgggc cggataacgg cccgttgttt
     4621 ttttatcgag ggttgacgca cgcaaaccta acgcaacgcg ctgggaatct gttgcgtaat
     4681 acaatgaata ttaccgccgc ccagcagaat ttcacgggca ggtacgccgg ttatcaaata
     4741 gtcgggaaac atctgttgca gcagcgcatg cgcatcggcg tcagtacgtg tatccagcaa
     4801 cggatagata atttgccggt tgctgatcag gaagttgaca taagaacccg ccagccgcga
     4861 cccggcgtta cgctcgatgg cattgccttc atcgacgccc gctgtttcct ccggcgtggc
     4921 gtacagtggc cccggcgccg gcaatttcca gatgttcaac gcccggcctt tagcatctcg
     4981 tgcctgtgag agcacccgat acgccgcctg cgaacggtgg tactgcgggt cggtttcatc
     5041 gtcagtccag tgcaaggcca cttcaccggg gcgcacgaaa cagcacatat tgtcgatatg
     5101 gccgtcggtt tcgtcgttat acacgccctc ttccagccag atgaaagaag acacgccgag
     5161 ataatcccgc aacagttgtt caatctgcgc ctggttcaag tgcggattgc ggttcgggtt
     5221 cagcagacac tcggcggtgg tcagcaacgt accttcgcca tcggtatgga tggaaccgcc
     5281 ttccagaatc agcggtgcgg cgtaacgcgc atcgccgtga tacgccagca cctgcgcggc
     5341 gacctgttcg tcacgacgcc agtcttggta caacccgccc aatgcgccgc cccaggcgtt
     5401 gaaccgccag tcgacgccgc ggcgttcgcc ggcctcattc agcaccacag tcggcccggt
     5461 gtcgcgcatc caggcgtcat cgctttccat ctccaccagc gtgacaccgg ccggcatgac
     5521 gcttttggcg agtgtcattt ggtcacgcgg cacgcccatg atgaccggcg tggtctgtgc
     5581 aatagcggcg gcaacggcgg caaaaatacg ctgcgctggg atgacgtcac cttgtgatcg
     5641 ccagttgtca cggcgatacg gccacaacat ccatacggcc tcatgcggcg cccattccgc
     5701 cggcatggcg aacccgtcct gcaacggcgt agtcagttcg gacatcattt atctccaggt
     5761 cttgccgtcg gacgtaccga tcacgccata catgtccgga cggcgatcgc ggaacagccc
     5821 ccaggacgcg cgctgtgcgg cgatggcgtc caggtcgaac tcgtgcacca gcaccgtttc
     5881 cgccgtcttg tcggcttgcg ccaccagcgc cccggtttga tcagcgatga atgacgaacc
     5941 gtagaacgtc atttccaggc catcgatata tttgctggcc tcggtaccga tacggttgga
     6001 ggcgatcacc ggaaccaggt tggcagcggc gtgcccctgc tgcacacgag tccagtgcgg
     6061 ctgactgtcg atatccggat acgccggttc ggaaccgatg gcggtcggat agaaaatcag
     6121 ctccgccccc ttgagtgcca gacagcgggc cgtttccggg aaccactgat cccaacagat
     6181 gcctacgccg actttggcgt agcgggtctg ccatactttg aaaccggtat cacccggaat
     6241 aaagaactgc ttttcctgat aggccgggcc gttcggaata tgggttttgc gatacacgtc
     6301 cagcacgctg ccgtcggcgt cgatcatcac cagcgaattg tagtaggcgt tattggcgcg
     6361 ctcgaagaaa ctcaacggca acaccacctc cagcgccttc gccagcgcgg cgaagtgttt
     6421 gataagcgcg ctggtttcca aatcctgggc cagcgcataa tgttccgggc tctgatcgat
     6481 gcagaagtaa ggcgcggcaa acagttcctg aatcaggatg atttgcgccc cctgagcatg
     6541 agcctgccgc accagttttt cggcattttc gatattcttt ggcaaatccc aggtgcaggc
     6601 catctgagtg gcggcgacgg taacttttgt catgcgagaa cctcaataat tttgtttctt
     6661 cccaccgtca gacggcaacg catgctgacg acgaaacccc ggtaaaaagt gtaggccaac
     6721 aatgaccccg atgcgccgaa acaaccatcg ccaacggcgt catgccgtat cgcgcaacaa
     6781 aaatccggcg acagcattat gcccgtgaat catgacggcg aggacatttc ccccgcttta
     6841 atgtcccgtc gtttttatgg ctgatcagtg tttgtagacg cattaataac aaatcccgcc
     6901 cagggaggta tggcgtgttt aacattcgcc acatccccct gcgagcggga tttcatcgcc
     6961 ggacgcgcac gcatccggcg gttacatcag aacaatttct tggcggtatc aagccaatcg
     7021 ccccggaatg ggcgcttcat gttctcgatg gcgtcgataa tatcatggtg aaccagtttt
     7081 tcattctgga taccgacgca acggccgccg tacccctgct gcagcagttc gatagagtag
     7141 gcgcccatgc gcgaggccag aatacgatca taggcgaccg gagaaccgcc gcgctggata
     7201 tggcccagta cggtggcgcg ggtttcacgc ccggtttccg tctcaatgta atgcgccaga
     7261 tcagcgacat cacacatcag ctcggtaatc gccacgatgg cgtgcttctt ccctttggcg
     7321 atacccgctt tgatctcttc caccaaatct tcttttttga agtccacttc cggtacgacg
     7381 atgaattcgc aaccaccggc gatcgcggcg gccagcgtca ggtcgccgca gtggcggccc
     7441 atcacttcga caatggagat acgctggtgg gaagacgagg tatcgcgcag gcggtcaatg
     7501 gcttccacca ccgtttccag cgccgtgaaa tagccgatgg tgtagtctgt ccccgccacg
     7561 tcattatcaa tagtgcccgg caggccgata cagggaaaac ccatttccgt caggcgtttg
     7621 gcccccatgt aggaaccgtc tccgccgata accaccaacg catccagacc acgtcgcttc
     7681 atgttttcca cacaaacctg acgcacagac tcctcacgga aagccggaaa acgcgcggaa
     7741 cccagaaacg tcccgccgcg gttgatgaca tcggacacgc tatagcggtc cagttgtttc
     7801 atacggtctt cgtacaaacc cagatagccg tcatagatcc cgaacacttc cagaccttcc
     7861 gtcagcgcag cgcgcaccac gccccggatg gcagcgttca tccccggcgc atcaccacca
     7921 ctcgttaaca ctccgattct attaatcatg acaacctctg gatttgtaga tgtaaattcg
     7981 cagattttct atcgcgaggc cgggtcaata ctggcgagcc tctaaccttt tataagcata
     8041 ttataacaaa aggccttagc tgaattgatt caggtcaggc ataagttcct ataaatatcc
     8101 attgcatgtc acacttttac aacacctttc aatgacagcg agatgaccga gcttagcgtt
     8161 accagcgtcc ccgctgctca agcggaacaa tcgaaatagg gtcttggtgg ataataacgt
     8221 cggaaccggg aaaacgtttg agcaatgcct gctccagcgc atccgcaata ctgtgagact
     8281 caatcaacgg cagttggtca tccatttcca ggtggagctg gataaaacgg gtcggccccg
     8341 aacggcgagt acgcagttgg tgcgcaccgt tgacgccggg ccatgaagcg atcattcggg
     8401 tgatttcctg ccgttcttca tccggcaggg cgcgatcgag caaagattgg atagcgtcat
     8461 aggccatacg caatgcactg gacaggatat agacgccaat ccccaatgca aataccgcat
     8521 ccgcccagcc aatgccgcgc cagctcaaga acaatgccac cagaatggcg ccgttcatca
     8581 gcacatcgga ctggtaatgc aacatgtccg cccgcaccgc ctggctttgg gtcttgcgga
     8641 tcacccaacg ctggaaactg accagcagaa tagtgatcac caatgcaaaa accgtaatcc
     8701 acatccccaa ttcagggccg ttcaatggtt gaggcgtact cagccgctgt accccgttaa
     8761 gcaacaggaa cagcgccgat ccggaaataa acatactttg tgccagcgcc gccaacgatt
     8821 cagccttacc atggccgaag gtatgttccg tatcggcagg ctgcaatgag taacgcacga
     8881 ccagcagatt caccagcgac gcggcgatgt ccaccagcga atccaccaat gacgccagca
     8941 aactcaccga accggtgtac caccaggcat acaccttcat accgaataaa aacagcgccg
     9001 tggcggtggc cagaaaagcg gccattgtca ccaggcgagc gtaatgataa ttcataccca
     9061 tctcctgcca aaacgaggaa acaagtataa cgaattccgg caccgaagaa ccgtgacact
     9121 ttacagagca cgccagccga cgtgccctat caccaagatc cggctactca tggcgctgcc
     9181 gcagcagttt ttgcaggcgc tcctgctccc agcgggacat cctcccgcga agccagaaaa
     9241 tcttgacgcc ttttaacacc accagccctc cccagatcag cggtacccag aaaaaccagc
     9301 ggtgccccga cccggtcatc tggttcacga taaacaacac cacgctgacc aacaccatga
     9361 ggatcaggct gcgccagaaa cggctttcct gacgtacctg ccgccgcgca tcttgaatgc
     9421 gctgttccag cgactcgccg ctaaccgtct gttcgctttc ttccgtcatc agttcggcca
     9481 cattgacgcc aaacgcggcg gcgatcgcgc tcaatgtctc caggctggcg cgctcgccat
     9541 tctcgatacg ctggatggtt ctgacgctca gggaggagag ctccgccaat tgttcctgag
     9601 accaggctcg ggcaaggcgt aatgtcttaa tcgaattcat gttcgttttc ctgttgttgt
     9661 gaaaaacagt ggtgaaaaac agctgtgaaa aacgatgcca gcttatgcca gccttcccac
     9721 ccgcgacacg acagcaaccc gacaggcaca cgacagtaac ccgacacctg ctggaatcag
     9781 ggccgaggcg ccttccacga cgcctcgaca aaccggaggg cgggcgtaaa atttcacgtc
     9841 acacacagga ttgcgcccgt tcggcgccat tagatagctt gaggatatca tgagaaaacg
     9901 ccccgcttcc cgctttctgg tcatcaatgc gcaactgcat gtgttgctgt ttcgctttga
     9961 acataaggat gacgccatgg ctggccgagc ctactgggca acgcccggcg gagcgctcga
    10021 agcgggtgaa tccttcactc aggcggctat ccgtgaactg tgggaagaaa cgggtctgaa
    10081 catcaccgac cctggagagg aaatcgccca acgggaattc gtcatgatga tgccgaatgg
    10141 caaagaagtc ttggcggacg agcgctactt cattattcgc attcagtatc acgatctgga
    10201 ttgcagccag tggaccgagc acgaaaaaaa aattatgcgg cgctaccact ggtggggaat
    10261 ggatgaacta cgccagacgc aggaaacggt gtatcccgac aatctgcccg cgttactgga
    10321 gccttatttg tcgataacgc ggtaaagacc ataaaaaacg gcccaatggg ccgttcagat
    10381 atcgtgttta ttgcaaacac attatgcgcg gtagtcacgc cgctctgaca atatagttaa
    10441 aagcgatgtt gcgggggcga gttgaaaccc agacagaacc ctcgctcgca taaacggtat
    10501 tgctcgctgt accgttaaca ccgttgtctc gggatgcctg ctctgtcagg tcaatattat
    10561 ttggtgcgcg gaaggcccct gccggagcag aaattgattt tgcagccgtg tcagcttcgg
    10621 catagcccat cccgatataa acgccaatgt tgtcaacatc actgccgttg taatccatca
    10681 tgccggttcg taaatacgtg ggattttgcg ctgtcaaaat cgccctgcca gcatcaacac
    10741 ccctaccatc atcccagccg cggataaatt cgccgcggag atcgggcaaa actccggagg
    10801 gatagaccgt cgccagcttc ggatacaggg ccttgtcgaa cgactgtcca ttacatttca
    10861 gccagccggt gggcgcggtc gcctgcggcc agggtagtgg gatacccaca acatcggcga
    10921 tattcatttt ttgagccaga cccgacgcgg tgctggctga caaattcgcc gttgcagtag
    10981 aaacaaacgc tgttgtcgcc aactgcgtgg tattggcacc ggctgccgcc gtcggtgccg
    11041 tcggcgtgcc ggtaagcgct gggctggcga gtggggcata ctgcggatgc ggatttgccg
    11101 ctgcgacatg attcgccgtt gcagtagaaa caaacgccgt tgtcgccaac tgcgtggtat
    11161 tggcaccggc tgccgccgtc ggtgccgtcg gtgtgccggt aagcgccggg ctagcgagta
    11221 gcgcatactg cgaatgcgga tttgccgctg cgacatgatt cgccgttgcg gtagaaacaa
    11281 acgccgttgt cgccaattgc gtggtattgg caccggctgc cgccgtcggt gccgtcggtg
    11341 tgccggtaag cgccgggctg gcgagtaggg catattgttt atggggattg gcgtcggcga
    11401 gatgtttcgc catcgcatca tcggcgtagg cttttaccac gacagcgctg tcatccacgt
    11461 acttgcgagt tgccagtacc accgacgggt caatttttag cgtgaccgcg tcggtactgc
    11521 tgacaatcaa gatcatgcgc accgtttgca cccggccgga gccttcctgt agcagcggtt
    11581 tgtaggtttc cgggcagttg gcgacggcaa tcagattgcc atcgttatca tacaggccga
    11641 tttcccggat ccaccacccg ccctcgtcct cggggatcac ctgttcagcg ataatctgat
    11701 tggggttggc ggaatcgaca ctcagcgaat tcagtgcggc gcgacgcttt tcattaatca
    11761 acgtggtttg tgtggtgctc ggcgttggca gcgaaccacc gccatcccct acgcccattc
    11821 gcgcgatttc cagttgcttc cccaatgccg tggcattggc cagcttgttt tcgcccactt
    11881 gagtgagcaa cgctatgtat tttgtcgtca tatcgtctcg tatctgaata agtgaaaaat
    11941 agtaacatca cgatatatgc agccaagatc accgcagctt tctgtcaaat cgtgatattt
    12001 cggtgaggag cgagacgtca ttatgctgac cgtcatcagg aatggcgcgt catggacgtt
    12061 gttaccggca tacaacaaca tcgcggcaca acatcaatca caacaaattg aaaaaaagat
    12121 attaatccga gataagcact gaaaagaaaa acggccctcg ggccgtttgc gttatcacat
    12181 tcccggctcc gtcggccaca caatgtctgg cgcatgaccg aaatccaccc ggcttaataa
    12241 caccagataa gcctgccaag aactcagtgc agacgcttct tccggcgtgg cgatccccaa
    12301 attgatggca taagttagtt cattcaaccg atcatttgcg ctgcgtcggc gtttttcctg
    12361 ttccgctttg gctgcctgta tcgccgcatt aattttggct gcgtcatccg ttacccacct
    12421 gccatcgcgc catacatcaa acgcactcgt cggcgccaac accgtcaact cgctgggtaa
    12481 ttcgcccatc tgagtcaccc gtaacggctg ccgggtttgt gtgttgtagg ccaattgccc
    12541 cctatagtcc ggtacatgca cccaacaaag cccgtcgtca ctgcggcgca aacccagccc
    12601 atcaggagga agcgaaggcg catcaagata tccccccgca ggcaagccag taccttgcat
    12661 caggtattca taaccggcgt gcagatattc atgcgtatcg ggatcagcga aatagaccac
    12721 cagccagccg ggtacggtag ttagcccgtt tgcccctaat tcagcagcct gcgctgtaat
    12781 ggcatatttt ttagtcatca tgcagccctc acgatgtagt taaaggcgac gttgcggggg
    12841 cgaacatacg aacgcgcccg tgatccgtta tgttcatatg acggcagatt actgaccgct
    12901 gaatactcgt cagtattgaa cgtgctatcg acattatcga ttctgattgt tgtcgcggca
    12961 gtgttgcttt cgatgttcgg ctgaatccac gttgcatcct gcacagacaa caccgcacgc
    13021 ccgctatcaa cccccctccc atcatcccag ccgcgaataa actcgccgcg taaatccggc
    13081 aatgtgcccg acggatacgc tgctgtcagt ttgggataga gggttttatc gaacgactga
    13141 ccgttacatt tcagccagcc ggtgggggcg gttgcttgcg gccagggcag cgggatgccg
    13201 gcaatctctg ctgcaaacca gcccgatgta atggcgctgg tgctgttatc tcccgccgcc
    13261 ggggcggtga gcgtggccgt gctggtaatt tttgtggttt tcccagttcc tggggcgata
    13321 gtgacatcgc cgctgtctgc caacgcgatg cggttgctcc ctttgccacc cagctcaagc
    13381 cagccgttgc tttcgctacg tccgacagtc cacaagaata cgccgtcact gttaagccct
    13441 ttaatatacg agccagacga tggtgccttt gtgctctgct gcaaaaggat ttgattaccg
    13501 tcgccgttga cggtgactgg tgtggtaatt ttcagtgact gacctgcttt aggggcaata
    13561 gtaatatcgc cgctgtctat gagcgcgacg ctattgccac ccaagtagct gtaaaactgc
    13621 gtgttcgtgc cggcatacgt cagttgcgct atctgaacac cgagattggt ctgaaacgat
    13681 atccctacag cagcattggc agttgcagct ttgagtaaca cggcgccggc gccatcagcg
    13741 gttactttta cacgcccggt aaactcaggg ctggcaagcg gcgcatactg aggatgcgga
    13801 tttgccgctg cgacatgatt cgccgttgcg gtagaaacaa acgcagtggt agccaactgc
    13861 gtggtactgg caccggctgc cgctgttggg gcggtgggtg tgcccgtcaa cgccgggctg
    13921 gcgagtgggg catattgttt atggggattg gcgtcggcga gatgtttcgc catcgcatca
    13981 tcggcgtagg ctttcaccac aatcgcgctg tcatccacgt acttgcgggt cgccaatact
    14041 acagatggat cgattttcag cgtgaccgcg tcggtgctgc tgacaatcaa aatcatacgc
    14101 accgtttgca cccggccgga gccttcctgt agcagcggtt tataggtttc cgggcagttg
    14161 gcgacggcga tcagattgcc cgctgcgtcg tacaagccga tttcccggat ccaccacccg
    14221 ccctcgtcct cggggataac ctgttcagcg ataatctgat tggtgttagt cgtgtcaacg
    14281 ctcagggagt tcaacggcgc ccggcggcgt tcgttgacca gtttggtttg tgctgcgtcg
    14341 ggagtcggca gggtgccgcc accgtcgccg agcgccattt gggtgataga caactgcttc
    14401 cccagcgcgg tagcgtttgc cagcagcgcg gcgccagtgg ttgtcagcag ggcaaaatat
    14461 tttgtggtca tgcgttcacg ctcacgttat cagaaagatg taccgcaccg ccacgcacgt
    14521 cggcgccggt tgtggtaatg gtttcaggaa agtagggata gatggtcagc gcgtcgccgc
    14581 tgtactgccc gacaatgacc ggcgccgcgc cccggctatc aagatggata gccagcccca
    14641 agagatggcg gctcgcaggc ttggcatcag caattaagcg ttccagctcc agataggttt
    14701 cttcggtgat gccggcatcc tgcacgccga tatccagccg gaaagtgccg ggtacgccgc
    14761 cggtttgcca ccactcggta atacgaatca gatagccgaa cggctcgacc acccggcgca
    14821 gggcggcgat ggtgcccttc tggcggtgta cccgccatgc cgccttgatc acctgacgtt
    14881 tggtctgttc tgaccagcgc ttatcccagc ggtcaactga caacgcccaa gcgagataag
    14941 gcaggaatga taccggacag gtgtcagggt tccataacgt atccagatcg accgctatct
    15001 cactcagatg ctgggtagaa ctggcgacat tgcgcataaa gtcactggcc gacggtggca
    15061 ataggctgtt actcatcgct gccgccctca gtgagagtca atccggtgca gtacgccgcc
    15121 tgcgtgtcgc tgatcaccat gtcttgcgcc ggttccagca gctcgacacg ttgcactccc
    15181 tgcacatgca gcgccgccat gatggccgag cgagccacat cacgcccgat gcgcccctgt
    15241 acgccaagcc atgacgttaa tgcctgctgc gcggcctgtt ggatcggttc cgattccggc
    15301 ccaggatagc ggtacaacac cgccgtaatg gcatagcgca caatctcggc gctttgcacc
    15361 gtcaggcggt cgccgaccgg gcgtttatcg tcggcggaca gggcggcatc aacggttgcc
    15421 agcagatcag ccgaggcact gccgtctccc tctgtggata acaccgacac cactaccacc
    15481 gctggggacg ggctgatcgc tttggcatcc gccaccttgc cgctggcact tttggcgaaa
    15541 tactcatacg cgccggtcgg cccggccacg ctcaacccct caaaggccgc ctgcgcccgc
    15601 aaccgtagcg cgctgtcgct ttccattatc gcgtcggcgg tgtcggtttc ctctgtaatg
    15661 gtcagccggg ccgtgttcag gttagccgcc agattatcca gatcggatga tacggcgtag
    15721 ctgagtaggc aggcttcggc gccctcgtta atccgctggc gtaacatcat ttcccgatag
    15781 gcgatcacct gcgctatcac ggttaacggt tcggactcca gttccaacgc ggcggttacg
    15841 gatgcctgtt gatcggcagg aaaggcagca atcatcaccg ctttcacatc ctgaaagatg
    15901 acttcgaagt ccagctcttc aatgatttgc ggctggggga gctgtgataa atcaaccgtt
    15961 gccatcgctg ttactcctga gcgtaagggt ggtgctggcc gcctgcatcg ttgcagtaat
    16021 aacgcccgat aactctgctg ctaccgcccc ggatgctgag taacgaatat cgatggcatt
    16081 cagcgagata cgcgactccc agcgcgtcag ggcgataaca gccgcactca tcaactgaag
    16141 ccgcgtcaca gcgttctgcg gcgcatccag caggtcaggg atcaggctgc cgtaatcccg
    16201 gcgcatcacc ctggatgcca gcggcgtagt cagaatgtcg cgcaccgact gccagagctg
    16261 atcggcatcg gtcagggtgc cggtgccatg cggattcatg ccggtatagg tcgcggtcat
    16321 tgtgtgccac tcgtccagct accgccgggc tgaatgccgc cgtggcggtg gttatccacc
    16381 tggacgccgt tagaggtcat cgcgccgtca gaatgcgcca cattaccggc cagggtgccg
    16441 ccgtgggtga tctccacggt gcgggccttc aggtgctgag tgcattccac caccggcgta
    16501 ttcagtgtga cgctgaccgc ggccaccacg ttgacggttt tcatgccggt ggcttccagc
    16561 gcaccagcca cagcgtcata ccgaaaccgg gcaccgtccg gcgcggtgat cacaatctcc
    16621 ttcaggctgt tgcccggtgc cgggtgggcc tcgctgaaca gactgccgat gatcacggcg
    16681 gtttccggat taccgccaag gcagcccagc cacacctgtt ccccgacggc gggcgggaac
    16741 cagacgttaa acgccccggc gcgtatggtg ttccagcgta gccagtcggt gagcaattca
    16801 ccgctcttaa cacgtacctg ccaggtttcc gggtcaactg ctgtgacgac gccgacgcgc
    16861 aagacgtttt ccagtaatcg catcagttca gcgctcatgt ggcagcactc cccaggctat
    16921 tgatcaccga gtcctggatc agctgctcat cagccgggga aatccccaac agtttacgca
    16981 ccgggtagcg ggcgaaggcg cccggcccga tctggtcacg ttcaccgtac tgatgcacgc
    17041 gggcgatacg ggcagccatg ccgccaaagc cgacgctcgc gccgttggta tcggcccgca
    17101 tgttgagaaa gcgatagctg cacaagcgct gaaacatcgg ggttttcttg ctggttgtgc
    17161 ggcgtatcgc ctgcgtgttg atctcgatat aacgctcaat atcgctgcgg taaaacgtgc
    17221 ggatagcgtt gcggtcttca tcaaaaccgg tgattgtgcg gccgtatttt ccccggccgc
    17281 cgtgccagtt tttcaggtgg cgcacctggc cttcccagac aaagaccatt cctttttgcg
    17341 aacgcaacac cttgcggcgg cgggttgcat aggccgagcc gtccgggttc ttctgcgcac
    17401 ggatgcgctg ttgctgactg cgtcgcagcg cctgcccgac ctgacgggcc gttttcagcc
    17461 gcccggcggg tgacaggccg gaaagaatgt cgtcaaacac ctgatccagt gcgtgaaacc
    17521 gtttatccgt cataccgctg tctccccggt cgcatcctca agcacagcgt cccatacccc
    17581 gccggtgagg cgcggacgag gttcaggcag atgttcagct cgcagggtgc cattatcatc
    17641 ccgcgtgacc ctgacccgct cgcgcaccgg gatttcaaaa aggatgtcgg cgctgtcgtc
    17701 gttgttgatc agcgtggtga atgtcacctc gcggttcttt tgcgggttca gcaacaggtc
    17761 gggctggttc tgccatagcc aggccattaa cggtaaggtg aaatcgtcga tatcaccggt
    17821 gaagttcatc acgaacagca ccagcgagta gcggtacaga aacgacggcg tttccccggt
    17881 ggtttcaatg ccgccctctt ccacaaacac cgtgaaggct tccgggttgg cccggcacca
    17941 ggtattggat gccgtcagtg caacgcgcag cgagtcggtt ttcagcatga gcattcccct
    18001 atggtgtggc ggcgtccttc aggcgttgaa gacgacgcag gtatacatcg ttgatggcgg
    18061 ctttgtccgc gttgcaggtg tccagcgcat ccagcagttg atcactccag agcgcgaccg
    18121 tgccccacgt caccggtgtt ttcagtgcgg gcgtcggtgt gggtgccgtc aggctgagcg
    18181 gtaccgggtc gtgcagtatt tgcacgctgg acggcggcgg cgcgtttttg caagctgtcg
    18241 ctgacagcaa caggcaccac agtgttagcg cacgtatcgg gctgcataac ctcacgcatc
    18301 ttttcacgac gttcttcccc ttcgacataa cgctgttgct cacgctcgcg cacctgcgcc
    18361 agcacggttc tggcatcgtc agccagtgcc cggacttcgt ttaacagttc gcgctgttgt
    18421 tgggcgctgt cggtcagtgc ctcggtatgc gctcggtcga tgccgcgctg gtaggtttgc
    18481 cagagcacgc caccgacggc cagcaccagc agcacggcaa gggtggctgc aagtttcatg
    18541 gcacacccgc cagatcgcgc aagcaccagg ctttaaagtc gctgcgacga ttgaccagcc
    18601 cggcggagcg ctggccgccg ctgttgacaa aatcggtcag ccgttcacac atcgcgggcc
    18661 attcctgcgc ctgggcatgt ttccagatag tggtgcgctg cttgctgccc tgccggttgg
    18721 taaaccacat caggccgctg caaccgaggt taaacgccgt gtcggtcatg gcttcaaacg
    18781 ccgattgcgg catggcggcg ccgttaaaat tgccgttgac gcagttctct gcccgctgca
    18841 tgtcgttaac ccagcggcgg gcaatctcgt cattgccgta cggccgattt tgtacgctac
    18901 cggtagagcc aatgcccacc gttagcacgc cggcggggca gtaatacggc gacgcccggc
    18961 agtcttccca actggctgtt ttctgctgtg cttcctgcga ggtgcgcaat gcgccggggg
    19021 acagcgtgac gccaagcgcg acaatcagcg caatcgaaca gcgtttaatc gcggttttca
    19081 tcgtcaacgt caccttgatg caaaatagcc accgcgcggc gttccgatac attcagcgtg
    19141 cggcgctcgg actgctgcaa aatctgttca atcagttcat tgcgacgtcg ttgtgcgcgc
    19201 tcgatacgac gccggaacag ccaggcgcgc cacgcggtga caacaccgat gaccagcccc
    19261 gccagcgcca ctttttcact gacggtcatt accccgatgc cagtcaccat cacggacagg
    19321 ccataggtca cgccatcatt caggcgctga agatcgttta atcccataac tgcccgtttc
    19381 ctgttctgtc gagcgggaaa tttcgggcag cgtgacagcc tgcccggccg tcagaaacat
    19441 ctggcggctc aatcccggat tggcggcgat cacctgctcg gtgacaccgg cggatgtgcc
    19501 gtaatggcga taacagagca aatccaccgt atcgccctga agcgcccaga ccaccatcag
    19561 cacaactccg caaaaaggcg tttggcgccg cgtatatcgg cgatactcca gcgcgcatca
    19621 cgccataaat cgtcacgctg gttgtcaaag gtgtccgttg ccttgtcgcc tttggccgtg
    19681 gtatccacat cgcggtatcc ctccagcagc agcgcgcggg caatggcata aaccgcacgc
    19741 ttgaagcggt acaccttgat gttttcgccg ttgacctgtc cggccggaac gtccgccagt
    19801 gcggtatatc cggcggcctg ttgcgtctgc tgccagctcg ccaactggtc agtcacatgc
    19861 accaccgctt ccgtggtgac gtgcatcagg cgagtggtgg tgataccgcc ggtgatacgg
    19921 gcggccagac gcagatcgcg caggacgatt accggccaga actccccggc gctgaccgcc
    19981 gccgcgccgt cgtcaatctc cggcacgtcg ccgctgtcgc tgacacgttt tggcgctacc
    20041 aggctcatgc tcaactctcc caaaagtcag gcggtgggca ccgggcaaaa agaccgtata
    20101 cgggcagatc acccggtgcg ccgcctgtcg gacggggccg aagtcgttaa cgtttggcag
    20161 actgacgggc ggctttactt ttgcccgtcg gccgtgtggt tttccgcgcc gtggtgttac
    20221 gcacggcggc tttttttacc gctggctgcg cggcgtcggc tgaagccgca ggcggtgtct
    20281 ccccggcggc tgtttccatg gtcgtctcat cgtcgccggg cgcaccgtct tccggcgcgt
    20341 cactgctgcc cggcatgagc tttttcagct cccgcgtcag ggtggcgatt tcccgtttta
    20401 cccctgcgtt gggattgcgg gccatcgctt cccggaacag tgtcagcgca tcggctttgg
    20461 tttgtgcatc caccgctgcg cggcgtgaga aggcgcgggc tttgcacagc ttggcgcgca
    20521 cttcatccgg catgtctttg ccgtccacaa tcgcggccac ttcatccagc acggcggtgt
    20581 aaccgctcag gtcagcgcgg tcgtcggtgg cggccagtgt cagtaccggg ttgctcactt
    20641 cctcagccag taccgttacc gcatcacggc ggaacttgtc ggcaggcaaa gacaggccat
    20701 gctcaacgac gtaacgcccc agttttagcg ccagtgcgct atcttggcag tcgatcgccc
    20761 acaccatcag ggtgacaatc acttcatcct gtcggccgct gtcgccttcc agcgtgccat
    20821 caatccagcc gtcgtattcc ggcagcatgg cttttttcat ctccgctttg gtcgcatcag
    20881 attgcacctg tttcagcgcc gcctgatgca ggcgcaggcg gtgaagaatt tgctcatggg
    20941 cggtgcgtga cacctccgtt tcgatgtcct cctggccccg gcgctcggcc atgacccgct
    21001 gaaaatgtcg ttgtgctggt gtcagcatgg tgtgttctcc ggttgggcgg agtgttaccc
    21061 cgccgggctg ttactcgctg tcgcctgctg cctgtgcgaa ctgaataccg tcgatcagtg
    21121 ccaccttgcc gtagtcctcc accacaaagt cgtcgttgga cgattggtag gtggcaatcc
    21181 ggttgtactg cggctcctcg acgatgctgc ggcgcaacgc ccccaactgg tagtaaaccg
    21241 acagattttt gaacgaggtg atcagcaccg cgttggacgg gaagtacggt gccaggaagg
    21301 tcggcaggcc gcccacacgc tcctggctga taatcaactg accggcgatc agttcactat
    21361 tggggttgct ctggctcagc gcattgaggc gcggaaagtt gctggacgtc agcaggtcgg
    21421 atgccatgat caccaccaga tccggcgctt tccggtgcca cggatccagc aggctgtttt
    21481 tggcgtcaaa cacagcggtg tcgaggttgc cgtaggtgcc tttggcgaca atcttgttgt
    21541 cttcgtcgcg ggcggtcagc gtgacgtttt taataatgcg gtgcgccgta tcattgcgga
    21601 ttttttgcag ccagcctacg ccgcaatcct gcaacagcgg attggctctg cggtcggatt
    21661 tctcggcata ggtggcgccg ttgaaaccga tcatgatgcg gtcaaggccg atttgccgcg
    21721 cattcgcttg gctgatcagc gcctgaaagt tcggccgcga tgcccaggcg tccaactgcg
    21781 ggtagctgag cgccgagtcg taattcactt ttcggcaatg gtagctgttc ggctctttgg
    21841 aatggttgtc cgtcggattg cggcgggacg tgccgtcgct gctgttattg gtgctggcaa
    21901 tcggcccttt gctaccgatc aggattttct gaccttcctg atccttcacg ccaaacacgt
    21961 taatctgttc caggaagtca tcgctttcct gtgctgcctg ctccatacgc tgctggatgg
    22021 ccggttcgac gctaaaggtc atcgccacgg cattcggctg caccccgtta agctgcgcct
    22081 gacgtgaaat gtactgttca aaaagattac gggtcgtgtt ttccatgttc gcttgtctcg
    22141 cttaacggta cttaaaagtc agccagctgt gcgccgctgt tgccgccgct ggccgccgga
    22201 cgctggctgt aactgttatc ctgcgtcgcc agcttctgcg tgagtgcggc cagttcgcgg
    22261 gtcaacgtct ggatagtgcg gttgtcctgc tgctgttggg ttttcagcgt gttgaaactg
    22321 tccagcaggt cagcatggga ctgggcgacg ttctccaccg cctcacgcac ctgggcgaac
    22381 tgttcacctt ccgatttacg gcctttgccg ataatcccca tcacgcggga aaaccattgc
    22441 ttcccctcgt cgctgcgctg ttcggacagc tcgaccagct ccgcttccat cgcttcggtg
    22501 aacatgaccg gctcaccggg cagattgttg aatgcctgca cctgtgcccg ttgctgtgct
    22561 gcgaatttca ggcgatctgt gcccaggctg gccggggtat ccgtcatcgc caggccgcgc
    22621 agatacggtt tgccggtcgc ggcaaactgc ggatcgattt cgatactgga ataaatcttc
    22681 ttcccttcgc cggtgagctg cttcattcgc tcggtgggtt cgatttccgc atacaacgcg
    22741 gcacggcctt ttagcgggcc gtcggtaatg tcttccgcgc tcagcgcaat aacatcaccc
    22801 atcgcactga aatcactgcc cggatagggg gaaagaatgt gctcaacgtt aacgcgggca
    22861 ccgtatacct gcgggttgta gctttccgcc attgcataga ggtggtcgcg tccgatttca
    22921 cgcccgtcaa cggtggaacc ggagacggca acccggaatt ttttgcgggt cggtttagct
    22981 gtaccgctca tgcctgtagt cctgtcctgt ggtatctgtg acatcatgat tgcagagcct
    23041 aactccctgt ctcaacgcgg ttttgttgtc ggcgtagggc cagagccgaa agtgagcgaa
    23101 aggcggatcg cgcgcggggt aatcttcccg gcaaaggggg aaaccgcgca tgattcagga
    23161 cgcatttgta cggcagcgag caaaacagct ttactggcag ggttacccgc cagcggaaat
    23221 ttcgcgcctg atggggatta atcaaaacac ggtgtatgcc tggaaaaagc gcgacgaatg
    23281 ggacgagacg ccgcctatcc agcgcgtaac gcattctatt gatgcgcggc tgtgtcagtt
    23341 ggcccaaaag ccgaccaaaa ccggcggcga cctgaaggaa atggacgcgc tgacccggca
    23401 gttaaaaacg ctgaacgacg gccagccagg caatgccgca ggcggcaaga aaccccgcaa
    23461 gcgcaaggtg aaaaatcact tcactgacga acagattgcc gcgttgcgaa ccaacattct
    23521 cgactcactg gcctggcatc aaaacggctg gtatgcccag caggatcaac gcaaccgtat
    23581 gatcctaaag tcccgccaga tcggcgccac ctggtacttt gcccgtgaag cgttattgcg
    23641 ggcgctgcgt gatgacgtag cttaccctta tcagcgccac cagatttttc tgtccgcctc
    23701 acgtcggcag gcgcaccagt tccggggctt tatccagaag gtggcggaag aggtggacgt
    23761 cgaactaaaa ggcggtgaca agatagtcct gagcaacggg gccgagctgc attttctggg
    23821 gacgtctgcc gcgacggcac agtcttacac cggcaacctg tatttcgatg agtttttctg
    23881 ggtcagtaac tttgccaacc tgcgcaaggt ggccggggcg atggcgaccc tgaaagggct
    23941 gacgcgcacc tacttttcca ccccgtcgag cgaaacccat gaagcgtacc cgttctggac
    24001 aggcgcacgc tggaatgaga agcgcagcaa ggcacaaaag gtcgcgtttg atgtgtcatg
    24061 gaaagcgctc aatagcggtt tgctatgtcc ggataaaacc tggcgtcaga ttgtgacgct
    24121 acaggacgtc atcgatcacg gctggcaata caccgacctg gaagaaatcc gcgacgaaaa
    24181 cagcccggat gaatacaaca acctgtacgg ctgtgagttc gtccgcgatg gtgagtccgc
    24241 ctttaacctc aacctgttat ttagctgcgg cgccgacggt tacgacgagt ggccggactg
    24301 gaagcccttt gcatcgcgcc caatggccga tcgcggcatc tggattggct atgacgccaa
    24361 cggcagcagc ggcaacggcg acagcggggc gatctcggtg gtggtaccgc cactggtggc
    24421 gggcggcaaa ttccgcacca tcgaaaccca gcagatacgc ggcctggagt ttgaagaaca
    24481 ggcgaaagtg atcgaagcgc tgaccttcaa atacaacgtg cagcatatcg ccattgatgg
    24541 caccggcatc ggcgaagcgg tctaccagat tgtgaagaaa ttcttcccgg cggcggtgtg
    24601 cttcctgatg tcggtgtcat ccaaacgcgc cttagtgctg aaaatgcttc aggtcattcg
    24661 tgccggtcgc tgggaatacg accgcagcga gcaggcgctg atcaatgcgt tcaacgccgt
    24721 gcggcgcgtc aagacgccgg gcggcatcat gacttacgac accgaccgcg cacgcggctc
    24781 taatcatggc gatctggcct gggcaaccat gctggccgtc atcaatgaac cactcggcca
    24841 ggagcaaggc ggcggtggct ttgcgatgga gttctgatga aaagaaaata taaacccggc
    24901 gcccgtccgg caatgacgcc tggtcagccg gatatggccg ccactctgaa aagcgatccg
    24961 gggctgagcg cgtttacctt tgacggccct tatccggtca gggacggcca cgacctgctg
    25021 gataacatgt attgcgccga taatggccgt tattacgaca ccccggtgga ctggtacggg
    25081 ctggctcgcg cgtttggtag tgcgtcatgg caccagtccg cgctgtactt caaacggaat
    25141 gcgctgaccg ggtgctttat cccgcacccg ttattgtcgc gtcaggcgtt ctccgccttc
    25201 gtgctcgact ggtttgtttt cggcaacggt tatcttgaac gccgggtcaa ccggctgggc
    25261 agcgtgttgt ccctgcgcca cgttccggca aagtacaccc ggcgcggcag cgacctgaat
    25321 acctattggt ttatccggca gtggaaggat gaacacgcgt ttgataccga cagcgtgtgc
    25381 cacgtcatca acccggatat taaccaagag atctacggta tgccggagta catgggcgcg
    25441 ctgctgtcgg ccagcctgtc gcactccgcc gatatgttcc gcaagctcta ctatgacaac
    25501 ggctcgcacg ccgggtgcat tatctacatc ggcgcatccc aggtggatac cgaaagcatg
    25561 gataacgtga aaaaaacgct gaaggaagca cgcggcaaag gcgcgtttaa aaacctgctg
    25621 ttacacgcgc cgggcggcgg tgaaaaaggg gtacagatta ttcccttcag ccagatatcc
    25681 gccaaagatg aattcctgaa tatcaaatca gtgacgcgcg atgacattct ggcagcgcac
    25741 cgcgtaccgc cgcaactgat gggcgccatg ccggaaggca acggttcttt tggcgatgtg
    25801 gagaaagccg cgcgggtgtt cgccatcaac gaactgatgc cggtgatgga agcgctgaag
    25861 catgtgaatg actggctggg gatggaggtg atccgcttca acccttacgc cctgttgaaa
    25921 gccgagtgat accccgccgc tgccgccgca ctcacgcggc ggtttttatt caaaaacttt
    25981 cacgtcacct gcgtactatc tcttttcagt tcaacggcta acgccaccat tccccgcccg
    26041 tataaaaccg tctcagcgcc gcgctgtcga gcgctctcac cggatgacgc gccgcgtctc
    26101 ctggagggaa atacacacgc agcagggcgg gaaatgggcc ggattcggca catcaaaggg
    26161 gatccctacc taccccccat cgcgggggct gttcccccgt caccagcgcg ctgctctcgc
    26221 ttcatttttt gtgcaagtgc agaaaccggc ccggcgcgcg agcgtaccgg gccgaaaggg
    26281 ggaaaatagc atcaaaaaag ttgtgcaaaa ttgtgcacta ttgtgcggta acttcaccaa
    26341 aaaaatcccg ccgaagcggg atacattagt gaaaaaacta ggcagttctc atgcgataag
    26401 cagacataga cacaacattt tctgtcgtga tttcaggtac aaaatctaaa gtattatcgc
    26461 ttgctaaccc cgctagcatg gctggagtga tgcataaacg ctgcgctaaa gattcaatat
    26521 caactgacag atccgttaga agaaacctca atgccttatg aaaaagctct ggcttttcat
    26581 ttgggattaa ataatcctct ttttcatcaa tagcttcccc cttacgtttc agaccaaaaa
    26641 atgccgtttt atactgagca tcagttaaga gagaaagctg atgcgccctg taaattattg
    26701 ctgctttact cactttccac gtcaatttaa actggctaag gccttgccag tcgatacgtc
    26761 cacctattgg gcgaggaaaa tactttgcca tcgccgagcg aggcagaagc aaggcggaag
    26821 caaatcggtt tgcttgcgat tccgttaccc tgtcccccgt cgaaatacct tcatgcaaaa
    26881 tcaaatgtgc aacttcgtgg gcaatatcaa aacgctgacg acacggtgac tttttagccg
    26941 tgttcctaac gataaatggg cgactcaaag gaacagacag cgcgtccaca tcatcagaaa
    27001 cagaatcgaa agatgtaaca aacgccccca acttttcagc aaggcgggtc atattatcga
    27061 tcggcccaaa gcctaacccc caatcagtac ggcatttttc agccgccttc tctatgtcct
    27121 cttgagtatg caccctcatt tcaggaaacc tgactgctgg caagtttaaa tactcatcga
    27181 aaacttcaat tagacggcga tacaattcag ctttagcaag cgtcgcccac ttagtagcca
    27241 tgcgtgtaga actacgtttg cggaagtgaa cgatctcttc attcactgga gactgctcct
    27301 gcacttcgaa aaattcgggc atgaccagca agacggcagc taatttattc gcaagatcag
    27361 gagtaggcac agcagagccg gattccagcc gctgaatata ctggcgggtc ttatcgaccc
    27421 gctcagctac ttgctccagt gataactcgt gatacagacg agccaatcgc aaattagaac
    27481 cgttaaacac ttttcaccta ctgttattcg ttatcgcttt tcttttcctt ttcaggaaca
    27541 gaagcgctga tatcatccag ctcaatctta acaggtgctg gcggggtatc atctgtagag
    27601 tgcagcactg ttacccgttc ttcgccataa gtccacaaag agagcatttc ttccagtgca
    27661 ttataacctg caaaatgcac gcgcccacct tcaccttcga actccggctt ctcaacaaca
    27721 aagcgccaaa tcgtagggat tgtatcctcc gacgcaaaca actgatcaac actattctta
    27781 cggaagaaat taggtttttt aggattagtt ggatcatcgc taaaagaacg aataggaatg
    27841 ccaccaatag ttattgtgta gtcattattc ggattagaga gtcccaacca gtcgtatttt
    27901 ttcgacatac acagcttcac gattcggttc ttttggcgtc caaaagtgca tgttgcgcgt
    27961 gtgtaattat catcaagcga agaagacaaa agttcatgtg tatcttcctg aactttaagg
    28021 agcgcctctg caatgatcga caggcgttct tcggttaact gtgggtgaaa cgtccaaggg
    28081 aatgggtaat cttgcatcgg gtcactttcc tttcagtgca aaaattaaac tttgtcaacc
    28141 ggaatgatgg tgcagttttt ttattttgtc aactaacccc tgttaatttt tacagcacat
    28201 ctcaaaatat aaatactaag ctaacaatct attagtggtt ccgtttttct catccaccaa
    28261 cgaacaccac cacaccttat ccccagttcc accccggcca cagctcgcaa tcccctgtct
    28321 ggcctacttc ctccagcctg ccgttaacca ttttcagcgc cctgccctcg cttattgcca
    28381 gactgcagcc acgaatcagc acatcgacca gccccggatc aggcggaaaa ccgcgtaagc
    28441 gcaacagttc cgataatcgc cgccgtaggc ccggcgtaca gttattgaca gaactccaag
    28501 ctgcggcggg gccgccagaa accccggccc ccgctgacgc ggcggcctgt ttcgggacaa
    28561 tcctccattg caccgttcgg gtgacgatcg cggagcgctc ccccagtaat ggcgaataca
    28621 ccccctgaac cttttgtacg tcttcggcat actggttcgc acgttccgta atctcatagg
    28681 acaaccgcac aacaagtgcg tcacgcgaca caagagggcc accctgcgct tgggtgtatg
    28741 cggcccagtc gcccacatct gctgccgcca gcaccgcatc catcgccgcg ttatccagtt
    28801 gcttatcacc caggcgtcgc agctcgcggt aaaccgttac cggcgcaccg ccgatttgct
    28861 gaaactgccg gatacgccag cgcgacgccc aggcagatac cgcctttgcc atgtcgcgca
    28921 ggttttcccc ggtttcctcg tcggcctcgc catccagtgc gtagccatca atattcttgc
    28981 tgatgtactt ggcgatataa cccgtggcgc tgcctttttc cgggtcaatc ggttcataat
    29041 gaaagcgggc tttttgcgcc ttttcactgt tcagctcatc ggcatcttcc cggcgggcgt
    29101 gatacgccat gatgtcgcgt acctgttcga tgtgctccgg gcgcatgaac aacaacaaat
    29161 gccagtgcgg cgtgccatcg tgatgcggct cgacgacccg aaagccaaac acgctaatct
    29221 cttcgcgtga cagctccgcc cggatacgcg cccacacacc gcacaggcat ttctgtgtgt
    29281 cgcgtgggct ggcaccgctc cactgttcga cgaacccgcc gccgctgtgt actgcgtgat
    29341 accgtgacgg cgcggtgatg gtgtaaaact ccccggcaca gcccatttcc tgcgccagat
    29401 cctcaaagcc gcgcattctc accatcagct cacaacggcg gatcgccggg ttggcgttgc
    29461 tggcgttaac cttgtcatcc atagagacac ggttaccctc ttcatcttcc agatcaaacg
    29521 ccttgaaaaa ctcccggtta cgccgtttct gctctttcca ttcatccagc gtggagcgcg
    29581 agacataggg tgacgccgct ttttgtacct ggccgaccgc aatcgccata tgctcccgct
    29641 gaatatcgcg gcggcgtttt agccgtgccc gccaccactc cggtgacatc atgcgtaaca
    29701 ggccggattc ggctttttcg gtcgataacg ggtggcggcc tttggtgaat tgcgcccagt
    29761 aagccggctg cgttccggcc tgcaaggtca gcaggccaag gtgacggaat gacagcaggg
    29821 tgatatgcct gtcagtcagg ctcccagtgt ttctgatgcg gttttcggtg tagtcgcgca
    29881 acgatgctgc catgaaatcg gccactcgtt gcgataaggc gcggatgttg tcacggtcat
    29941 aaaccggcag cttttccaga tcatcaccga acgggaacgg cagatctccc gcagcacgtt
    30001 gttgcgtctg gtatcgttcg gtaacggtgc gcaggcgtgg caatacgctt ttccccaggg
    30061 tacggagtaa aaacgtattg gcccggcggc gccccttgtg ctcatcggat ttaaacagct
    30121 tttcataacg ctggccgaaa tacttcgcca gataatccgg cattccggcc agatactgct
    30181 gacgccattc atgatcgacc ttattcaggt gccagaggct gcgttcaaca tagctcagcc
    30241 ctgcaggctc gccgggggaa aactgttcac gctgccattc cctgacagcg tgatacacgc
    30301 cgttatgctc cagaatctgt aaatcagtca ctcacaaacc ccggcataga cactgctaca
    30361 aaccgacttg tcgtttgcct ctgccaaaag gtcgaattgc gcccccccgc gtgtcgtcat
    30421 agcccaatcg cggtaagact caatgccgta ttcatcaacg gtaattatgt cgatccgctg
    30481 ttccgctcta cgtggatcat gggtggaagg aaaaaacgtt gaatttcctc tgcgtgagca
    30541 ggcggctacc agtctttccc actcagcaac acgctttatt tcttcaggcc agcggctgaa
    30601 tatttccgcc aattcagact tacgggcatg gatacacggc atacacccaa cccggctaca
    30661 gccttgttga tatagcgggt taggcttaat cccatgacgt ttagcaatgg cgaagacatc
    30721 ttcatgtttc cattcaagga tcgggcgata aacatgcaaa ccgggagtgt tatccgcatc
    30781 ttcttcccat actggcaaac cggcccgggc gggtgactct tgagcgcgaa ccccctgcca
    30841 gcttattacc tcgtcatatt catcaagcgc aggtagaact acctgagtac gcacaggttc
    30901 gtgcttaagt tcgaaggtgc aaaatcgagc tttagtgctg gggaatctac ccttcaacat
    30961 gcaaagatcg aggaatggat tgccagttgg ccggagatta tcaagagctg acttaaccct
    31021 agcagcagcc tcaacctcag catcttgctg gttcagaccc tttacagatg gaatccactg
    31081 aaacccattt aagacagcag tgttataacg atcatcaggc acagattcag gccatacaaa
    31141 acgctcccgc ctaccattag ggtataaaag atactcatca aaataagtat catcgtcctc
    31201 atctaacatt attttctgga cacggaaacc ggatgccagc gcccagcgac cctcgaatct
    31261 atccaccatc aggtcagtga tcagcccctg ataccagtta ttcgtaataa attttctttt
    31321 ctgctctatc tgtcttgaaa aatcagcctt tactcgtttg attgggccta atttgctttc
    31381 cagatagccc agatactcaa ttgtctgcgg gtgctcatgc cctgtatcag caaagacagc
    31441 ggtgtgctgc actccgtgtt caatggccag aagccactga gccaagctgt cttttccgcc
    31501 agacacgctg ataacgttga tggtgtcgtt ctgaaagcaa cgggaatcaa tcatcagaat
    31561 ggctccgcat ttaacgcgcc ggacgccgcc attacatgat gaatggcatt acctatcccc
    31621 agcccacagt cagggcagtg cctaccacct tcatagccgc acccgtcgca aactttcgac
    31681 agactgcggg cagcagacac cggcagacgc ttagcaatga tttccccggc ctgtttacct
    31741 tccccagcag caacgccgac gctacgcggc gcggtgaaac ggcagatatc aaaccggtga
    31801 taaaggctgc gtgcgtggtg ggtatcactg ttggacgcga tgacagggat cccgcgttcg
    31861 gccagacgtg ataactcact gcacaggtca tactgatcgt tgtgggtgaa accatcggtg
    31921 tgataactgg tgaagctggc cgttggcgtt tgcgggatat acggcggatc gcagtacacc
    31981 acatcgccgg ggcggatcag ttgaagtgtt tcgccaaacg cggcgcagat gaattttgca
    32041 cgacgggctt tttcggcaaa tgcctgaatc tcggccagtg gaaaataagg cgatgcataa
    32101 tgcccgtaag ggacgttaaa cccaccgttg cggttatacc tgcaaacgcc ccggtatccg
    32161 tgccggttca ggtaaagaaa cagtgccgca gatgtgatgc gattctcttt gctgcggtta
    32221 aatacctgcc ggaagcggta ataactttct gccgtgttcg cggtgcggaa cagaccttcg
    32281 gcggtatcaa taaaatcctt cacatcttct ttgaggacct gatacaggtt aatcaggtcg
    32341 gggttgatat cggcgatcag gtactccggg taatcggtat tcatcatgac cgcacaagac
    32401 ccggcgaacg gctcaaccag acgatcacca accggtaaat gctcacgcag gatatccatc
    32461 acgcgggctt tgctgccgac ccatttcagc ggtgtggcga taatgctcat aaggcacccc
    32521 gatagtgttt gtttttcagt tcagcatcac cctggcagta cacgcacaga cacacacccg
    32581 gaacggccac gcggcgggct tcgggtatgg gggcgtcgca gttttcacag acgaatgcag
    32641 aaacggcaca acccgactgt tgccgggcct gttggatttg tgtttcacgg atgaacgctt
    32701 cgcgttcctg agccatatcc atggagtcca tcagctcaac ccctgagcgg agtactcaaa
    32761 acgttctgac tcctggcgca tcagttccac cagttcagcg gcagagagat ctctttgctg
    32821 ggcgcggata gccagcgcag caagacgcag tgagaaggac aaatgctggt ctttgcgctc
    32881 ctccagtctg gctttattca gcagttcgat cagtgcgcca tcagcagcga cggtcatggt
    32941 ctttacttcg gcatttttca ttacggtttc cttttttcag gtaatgcgaa tccctgcccg
    33001 ataaagggca tttattcgtt gctatgggtt aattaatgaa taggtgactg gttcggctta
    33061 ttgggtgtgc cgttttgatt actggttttc agaaaatcat cagggccaaa tagcgcagtt
    33121 tcatcgcaga tagcccggat gcgcttaatt gcgccccaga tagcggcgcg ctcttccgcc
    33181 gtaaactgat gccatgagta attgacatgg cgcgatttca gctttggctt tgcggaaaaa
    33241 aggataatct cacgcgtttc cagtgcagca cgctcccaaa atgactgagc gcgggattca
    33301 cctttaaaca cgatatccct gcaacgctgt atccatttct gatgatcgac agattgagac
    33361 atgcgccctc ctgattaccg attaaacgcc cctttcggcg ggttccagcg gcggccatcc
    33421 ggccgaataa tgatgccctg cttgccttct ccgtggcgta tttctggttt gatacggctt
    33481 tccgtctgtt gctgccagag gaaaggcgca attgagattg gtttttgcat tgttcctcct
    33541 attggtaacc gcccacagat agacggttgc aaataggtgc cgggatattt agccacgccc
    33601 ggccgtggtt tctctggtgt tgtttttatt ctttatcact gcactattga gatacgctgt
    33661 tatgtaagct gtcgatataa ccggtagcta atgccagcgc atcaaataaa ccgtaagact
    33721 gcccttccct gctaacgcga tatcgcttaa ttgagtttgt gattgttctt ggatattcaa
    33781 caactgaaaa gccacgatat atactggtgt gcttactcag gcgaataaca gcaaattcct
    33841 ttttaaccat aattattcac ctataacccc agccataata accatgcgtc acgctgttct
    33901 ttcggcctgt tcataaaggc atcgcgcata gcacggttaa attccgggat ataaacccag
    33961 ttttcaccgc gacgaggatt ggggttttca ggattcaccc acggaataag cggcaatttg
    34021 ccattatcaa ccatgccttt tactgccgct tccgacttac cgatcaattc cgcaaatttc
    34081 tgatacggaa cagcatcaac aggatagcga acctcataaa cgcgttcact catcacaaac
    34141 ctcgcttttc attttgcgtt attgaatatg tgccgggatt tttagccacg cccggcgcgt
    34201 ggttatggta ggattgctgt gctcacatca atcaactacc gacaaaggag tctattttat
    34261 ggacttaaat ctaactgcat gttttagggt ttacgagaaa acattcaaca atatcgcaac
    34321 tgccctcaaa ataaataacc cagataacac ttatctttgc gcccctttaa ctcttcgaac
    34381 tcttgtgatc tttaaaatta accttatact ttttgagtac cgcgaaaacc ttgataaaaa
    34441 aagagaggtt ctcatcggta gaaatgcatt aactcattat ctttttaata aaaaagggat
    34501 aacatttact gaagcaaaaa atatttcact aaacgatgca gtaatcattt tatggaatga
    34561 aataaattca tataaaatcc ctgaaaatat tataaatcac attagaaacc atagtgataa
    34621 ttatcatcac accgataacg acatctctaa gttcaagaaa gactaccctt cctatataga
    34681 tgaagaatgg gatcctaatt atgctgatga agaactgagg aaataaattc attcagctcg
    34741 tctaactccc tttcagcact atctgcactg gcccgcaatt tttctggtct ttccttgaga
    34801 gattcgcggg cttccaattt cttaatgaaa gttagcaaga actcaatcaa ttcatcatca
    34861 gtaagatcac cacgcataat gctgggtcct actttattct caccttccat ccgttcaccc
    34921 ctccccctca ccgtgatact ctcttccgat caccaatcac ttacatcggc tttcagttgc
    34981 ttgtgttcgc ggttggtttt tcatgccctc attggaaccc atataggtgc caatgagggg
    35041 aatttagatc ctatatgggt tccatgtcaa atgaaactta gcgaaaaagt aaaggcacta
    35101 agagaagcag agggacttag ccagtcaaga ttttgtgaaa tcatagactt acctctaagc
    35161 actcttaaaa aatatgagac tggcaacttt gagccagggg gaaatgcttt gctcaaaatc
    35221 acaatgcatc ccactttcca aaaatacacc ctgtggttaa tgacggataa aacagcaccg
    35281 gaagctgggc agatcgcacc ggccctcgcg cacattgggc cagaagaaac aaaatctcac
    35341 caatcaaacc agaatattgg ataaatattt acataagtta catctttgat attgcatatc
    35401 aggatgatga ctgcatcgga gagtgttctt atggcaatta agaaactcga tgatggtcga
    35461 tatgaagtgg acattcgccc gataggacgt aacggaaaac gcatccggcg gcggtttgag
    35521 aaaaagacag aagcggtagc attcgaacgc tacacgttgt ccagagcgga caaaaaagag
    35581 tggcagcacg gttatggcgt tgaacatcgc cagctcagtg aactggttga attatggtgg
    35641 ctttactacg gccagaatct gaagaatggt ttgatagaaa agcgtcacct gaaacggaca
    35701 gcggcccaga tggacgaccc ggagatatgc cggataaaca agcgttcaat tctggaattc
    35761 cgtacccggc gattatatga cggtatcagc tcttcaacgg tcaatcggga catctaccgg
    35821 ctttccggga tgttttcggc actgataaaa ctggagatct acaccggcga gaatccctta
    35881 aaggaattgc caccgttgcc agaaaagcag ccaacagtca ctttcctgac tgaatcagag
    35941 attgcacgcc tgctggatac gatggaaggc gatcaatacc ggctggctgt gctgtgcctg
    36001 agtaccggcg caaggtgggg agaagccagc acattacggg ctgaacaggt gatgcataac
    36061 cgggtgacgt ttaccgaaac caagaacggt aaaaacagaa ccattccgat atcggaagag
    36121 gttacgcgga tcatcaaaac ccgtgaaacc ggaaagttgt ttaaagtgga ctactcggca
    36181 ttttgcgagc aaatcaaagc ggtaaaaccc gatattccga aaggccaggc atcacacata
    36241 ctacggcaca catttgccag ccattttgtg atgaacgggg gaaatctggt ggcattacag
    36301 cagattttag gtcatgccag cattcagcaa accatgactt acgcgcatct tgcaccggac
    36361 tatctgcaaa acgctataac actcaaccca ttacggggaa aaatagcggt ttag
//
