# Supplementary material for: May the Phage be With You? Prophage-Like Elements in the Genomes of Soft Rot Pectobacteriaceae: Pectobacterium spp. and Dickeya spp
Source: Front Microbiol. 2019 Feb 14;10:138. doi: 10.3389/fmicb.2019.00138 (PMC6385640; doi:10.3389/fmicb.2019.00138)
Supplement: Supplementary file 2 [file Data_Sheet_2.ZIP › Supplementary_prophagesGENBANK_files/Genbank FILES _SRP_prophages/phiDpa2.gb]

LOCUS       Exported               36416 bp ds-DNA     linear   UNK 02-AUG-2018
DEFINITION  phiDpa2.
ACCESSION   .
VERSION     .
KEYWORDS    .
SOURCE      phiDpa2
  ORGANISM  phiDpa2
REFERENCE   1  (bases 1 to 36416)
  AUTHORS   .
  TITLE     Direct Submission
  JOURNAL   Exported Aug 2, 2018 from SnapGene Viewer 4.2.3
            http://www.snapgene.com
FEATURES             Location/Qualifiers
     source          1..36416
                     /organism="prophage phiDpa2"
                     /mol_type="genomic DNA"
                     /note="/genome_id=6666666.356841"
                     /note="/genome_md5="
                     /note="/project=robertczajkowski_6666666"
                     /db_xref="taxon:6666666"
     CDS             2..811
                     /codon_start=1
                     /product="Ferredoxin--NADP(+) reductase (EC 1.18.1.2)"
                     /EC_number="1.18.1.2"
                     /label=Ferredoxin--NADP
                     /db_xref="SEED:fig|6666666.356841.peg.1"
                     /db_xref="GO:0004324"
                     /translation="MVNEWRIVTSALRRHRKQEHDTMAEWVTGKVIEVEHWTENLFSLR
                     LEAPIAPFTAGQFAKLALERDGERVQRAYSYVNAPSNNRLEFYLVAVPDGQLSPYLHRC
                     QPGDEVLVTQEAAGFFVLEEVPDCDTLWMLATGTAIGPYLSILQEGRDLARFQHIVLVH
                     AARYARDLSYLPLMQQLQQRYGDKLRLQTIVSRETAPGSLTGRVPALIASGELESAVGL
                     PLDQTSHVMLCGNPQMVRDTQQLLKETRQMSKHLRRRPGHITSEHYW"
     CDS             complement(817..1176)
                     /codon_start=1
                     /product="conserved membrane protein"
                     /label=conserved membrane protein
                     /db_xref="SEED:fig|6666666.356841.peg.2"
                     /translation="MAIWLALTVGLFMLAGAGLLNTQTAAFMLVALIWPTAAVLVKRLH
                     DRGKSGWWALLLVLAWMLGNGNWYMLPDMGQWVLGRFLPMLIMVMTLLDCGMFAGTVGA
                     NRFGKETELLQLRSW"
     CDS             1322..1990
                     /codon_start=1
                     /product="probable exported protein YPO0086"
                     /label=probable exported protein YPO0086
                     /db_xref="SEED:fig|6666666.356841.peg.3"
                     /translation="MTTAHECRLITQHICHTTALSDEDAMKNALPIFYCLATALFGAFP
                     AWGDPLFQQKPPTAAPYLLASAPTFDMNIVQFRTRYNLSNPSLPISEYRVVDTGENSPT
                     LTRAASRINDYLYSSTALEKGTGKIRTMQITWLPRPKDTDESGRRKQAIDYMAALLRTF
                     MPSLTNEQSLKKVDMLLGKGKGHRFYQQTEGALRYVVADNGEKGLTFAVEPIKLTLSDS
                     "
     CDS             2133..2882
                     /codon_start=1
                     /product="Triosephosphate isomerase (EC 5.3.1.1)"
                     /EC_number="5.3.1.1"
                     /label=Triosephosphate isomerase
                     /db_xref="SEED:fig|6666666.356841.peg.4"
                     /db_xref="GO:0004807"
                     /translation="MGNWKLNGSTNMVLELIAGLRKELSTVDGCGVAIAPPALYLDQAK
                     HQLSGSRIALGAQNVDVNLSGAFTGETSAAMLKDLGAKYIIIGHSERRTYHHESDEFIA
                     KKFAVLKETGLIPVLCIGETEAENEAGQTEAVCARQLDAVLNTLGAQAFENTVIAYEPV
                     WAIGTGKSATPAQAQAVHKFIRDHIAKQDAAIAAQVIIQYGGSVNAANAAELFTQPDID
                     GALVGGASLKADAFAVIVKAAAEAKKA"
     CDS             3153..3686
                     /codon_start=1
                     /product="Alkaline phosphatase (EC 3.1.3.1)"
                     /EC_number="3.1.3.1"
                     /label=Alkaline phosphatase
                     /db_xref="SEED:fig|6666666.356841.peg.5"
                     /db_xref="GO:0004035"
                     /translation="MIKKTLISSLVMTLVAANAIAADAAYVRQAAGDITQPGGARRLSA
                     DQTEMLKAALNAKTAKNVILLIGDGMGDSEITVARNYAMGAGGFFKGIDALPLTGQYTH
                     YSLDKKNPQTGLRDRLRCVRHGLVKRCEKPTTARWAWMLTAKTTKPCWKSPKQRAKPPA
                     TSPPPNWKTLPQQP"
     CDS             3683..4558
                     /codon_start=1
                     /product="Alkaline phosphatase (EC 3.1.3.1)"
                     /EC_number="3.1.3.1"
                     /label=Alkaline phosphatase
                     /db_xref="SEED:fig|6666666.356841.peg.6"
                     /db_xref="GO:0004035"
                     /translation="MISHVTSRKCYGPEKTSQQCATNAQENGGRGSIAEQLLVARADVT
                     LGGGAATFKEVAKAGKYQGKTLLEQAQALGYNLVTDLDSLSAVNVASQNKPVLGLFADG
                     NMPVRWQGPKASYHGNLDKPVITCEPNAQRTAATPTLAQMTDKAIQLLSKNKNGFFLQV
                     EGASIDKQDHAANPCGQIGETVDLDEAVQKALEFARRDGNTLVIVTADHAHSSQIIENG
                     AKAPGLTQALNTKDNAVMTISYGNSEEESQGHTGTQLRIAAYGPHAANVVGLTDQTDLF
                     YTMKSAMGLK"
     CDS             complement(4650..5750)
                     /codon_start=1
                     /product="Agmatine deiminase (EC 3.5.3.12)"
                     /EC_number="3.5.3.12"
                     /label=Agmatine deiminase
                     /db_xref="SEED:fig|6666666.356841.peg.7"
                     /db_xref="GO:0047632"
                     /translation="MMSELTTPLQDGFAMPAEWAPHEAVWMLWPYRRDNWRSQGDVIPA
                     QRIFAAVAAAIAQTTPVIMGVPRDQMTLAKSVMPAGVTLVEMESDDAWMRDTGPTVVLN
                     EAGERRGVDWRFNAWGGALGGLYQDWRRDEQVAAQVLAYHGDARYAAPLILEGGSIHTD
                     GEGTLLTTAECLLNPNRNPHLNQAQIEQLLRDYLGVSSFIWLEEGVYNDETDGHIDNMC
                     CFVRPGEVALHWTDDETDPQYHRSQAAYRVLSQARDAKGRALNIWKLPAPGPLYATPEE
                     TAGVDEGNAIERNAGSRLAGSYVNFLISNRQIIYPLLDTRTDADAHALLQQMFPDYLIT
                     GVPAREILLGGGNIHCITQQIPSALR"
     CDS             complement(5751..6635)
                     /codon_start=1
                     /product="N-carbamoylputrescine amidase (3.5.1.53) / 
                     Aliphatic amidase AmiE (EC 3.5.1.4)"
                     /EC_number="3.5.1.4"
                     /label=N-carbamoylputrescine amidase
                     /db_xref="SEED:fig|6666666.356841.peg.8"
                     /translation="MTKVTVAATQMACTWDLPKNIENAEKLVRQAHAQGAQIILIQELF
                     AAPYFCIDQSPEHYALAQDLETSALIKHFAALAKALEVVLPLSFFERANNAYYNSLVMI
                     DADGSVLDVYRKTHIPNGPAYQEKQFFIPGDTGFKVWQTRYAKVGVGICWDQWFPETAR
                     CLALKGAELIFYPTAIGSEPAYPDIDSQPHWTRVQQGHAAANLVPVIASNRIGTEASKY
                     IDGLEMTFYGSSFIADQTGALVAQADKTAETVLVHEFDLDAIAAQRASWGLFRDRRPDM
                     YGVIGTSDGKTWR"
     CDS             complement(6632..6799)
                     /codon_start=1
                     /product="hypothetical protein"
                     /label=hypothetical protein
                     /db_xref="SEED:fig|6666666.356841.peg.9"
                     /translation="MLSPDFCCAIRHDAVGDGCFGASGSLLAYTFYRGFVVSMRCRLTV
                     GRNKIIEVLA"
     CDS             complement(6857..6976)
                     /codon_start=1
                     /product="hypothetical protein"
                     /label=hypothetical protein
                     /db_xref="SEED:fig|6666666.356841.peg.10"
                     /translation="MRARPAMKSRSQGDVANVKHAIPPWAGFVINASTNTDQP"
     CDS             complement(6989..7903)
                     /codon_start=1
                     /product="6-phosphofructokinase (EC 2.7.1.11)"
                     /EC_number="2.7.1.11"
                     /label=6-phosphofructokinase
                     /db_xref="SEED:fig|6666666.356841.peg.11"
                     /db_xref="GO:0003872"
                     /translation="MNAAIRGVVRAALTEGLEVFGIYDGYLGLYEDRMKQLDRYSVSDV
                     INRGGTFLGSARFPAFREESVRQVCVENMKRRGLDALVVIGGDGSYMGAKRLTEMGFPC
                     IGLPGTIDNDVAGTDYTIGYFTALETVVEAIDRLRDTSSSHQRISIVEVMGRHCGDLTL
                     AAAIAGGCEFIVVPEVDFKKEDLVEEIKAGIAKGKKHAIVAITELMCDVADLAHYIETE
                     TGRETRATVLGHIQRGGSPVAYDRILASRMGAYSIELLQQGYGGRCVGIQNEKLVHHDI
                     IDAIENMKRPFRGDWLDTAKKLF"
     CDS             complement(8161..9063)
                     /codon_start=1
                     /product="Cobalt-zinc-cadmium resistance protein"
                     /label=Cobalt-zinc-cadmium resistance protein
                     /db_xref="SEED:fig|6666666.356841.peg.12"
                     /db_xref="GO:0006812"
                     /db_xref="GO:0008324"
                     /db_xref="GO:0016020"
                     /translation="MGMNYHYARLVTMAAFLATATALFLFGMKVYAWWYTGSVSLLASL
                     VDSLVDIAASLVNLLVVRYSLQPADTEHTFGHGKAESLAALAQSMFISGSALFLLLNGV
                     QRLSTPQPLNGPELGMWITVFALVITILLVSFQRWVIRKTQSQAVRADMLHYQSDVLMN
                     GAILVALFLSWRGIGWADAVFALGIGVYILSSALRMAYDAIQSLLDRALPDEERQEITR
                     MIASWPGVNGAHQLRTRRSGPTRFIQLHLEMDDQLPLIESHSIADALEQALLKRFPGSD
                     VIIHQDPISIVPLEQRGRW"
     CDS             complement(9166..9642)
                     /codon_start=1
                     /product="hypothetical protein"
                     /label=hypothetical protein
                     /db_xref="SEED:fig|6666666.356841.peg.13"
                     /translation="MNSIKTLRLARAWSQEQLAELSSLSVRTIQRIENGERASLETLSA
                     IAAAFGVNVAELMTEESEQTVSGESLEQRIQDARRQVRQESRFWRSLILMVLVSVVLFI
                     VNQMTGSGHRWFFWVPLIWGGLVVLKGVKIFWLRGRMSRWEQERLQKLLRQRHE"
     CDS             complement(9629..9751)
                     /codon_start=1
                     /product="hypothetical protein"
                     /label=hypothetical protein
                     /db_xref="SEED:fig|6666666.356841.peg.14"
                     /translation="MPVGLLSCRGWEGWHKLASFFTAVFHHCFSQQQENEHEFD"
     CDS             complement(9841..9966)
                     /codon_start=1
                     /product="hypothetical protein"
                     /label=hypothetical protein
                     /db_xref="SEED:fig|6666666.356841.peg.15"
                     /translation="MFKAKQQHMQLRIDDQKAGSGAFSHDILKLSNGAERAQSCV"
     CDS             9943..10338
                     /codon_start=1
                     /product="NUDIX hydrolase"
                     /label=NUDIX hydrolase
                     /db_xref="SEED:fig|6666666.356841.peg.16"
                     /translation="MLLFRFEHKDDAMAGRAYWATPGGALEAGESFTQAAIRELWEETG
                     LNITDPGEEIAQREFVMMMPNGKEVLADERYFIIRIQYHDLDCSQWTEHEKKLCGATTG
                     GEWMNYARRRKRCIPTICPRYWSLICR"
     CDS             complement(10416..11912)
                     /codon_start=1
                     /product="Tail fiber protein"
                     /label=Tail fiber protein
                     /db_xref="SEED:fig|6666666.356841.peg.17"
                     /translation="MTTKYIALLTQVGENKLANATALGKQLEIARMGVGDGGGSLPTPS
                     TTQTTLINEKRRAALNSLSVDSANPNQIIAEQVIPEDEGGWWIREIGLYDNDGNLIAVA
                     NCPETYKPLLQEGSGRVQTVRMILIVSSTDAVTLKIDPSVVLATRKYVDDSAVVVKAYA
                     DDAMAKHLADANPHKQYALLASPALTGTPTAPTAAAGANTTQLATTAFVSTATANHVAA
                     ANPHSQYALLASPALTGTPTAPTAAAGANTTQLATTAFVSTATANHVAAANPHPQYAPL
                     ASPALTGTPTAPTAAAGANTTQLATTAFVSTATANLSASTASGLAQKMNIADVVGIPLP
                     WPQATAPTGWLKCNGQSFDKALYPKLATVYPSGVLPDLRGEFIRGWDDGRGVDAGRAIL
                     TAQNPTYLRTGMMDYNGSDVDNIGVYIGMGYAEADTAAKSISAPAGAFRAPNNIDLTEQ
                     ASRDNGVNGTASNTVYASEGSVWVSTRPRNIAFNYIVRAA"
     CDS             complement(11909..12037)
                     /codon_start=1
                     /product="hypothetical protein"
                     /label=hypothetical protein
                     /db_xref="SEED:fig|6666666.356841.peg.18"
                     /translation="MTVSIMTSRSSPKYHDLTESCGDLGCIYRDVTIFHLFRYETI"
     CDS             12024..12143
                     /codon_start=1
                     /product="hypothetical protein"
                     /label=hypothetical protein
                     /db_xref="SEED:fig|6666666.356841.peg.19"
                     /translation="MLTVIRNGASWTLLPAYNNIAAQHQSQQIEKKILIRDKH"
     CDS             complement(12176..12802)
                     /codon_start=1
                     /product="Tail fiber assembly protein"
                     /label=Tail fiber assembly protein
                     /db_xref="SEED:fig|6666666.356841.peg.20"
                     /translation="MMTKKYAITAQAAELGANGLTTVPGWLVVYFADPDTHEYLHAGYE
                     YLMQGTGLPAGGYLDAPSLPPDGLGLRRSDDGLCWVHVPDYRGQLAYNTQTRQPLRVTQ
                     MGELPSELTVLAPTSAFDVWRDGRWVTDDAAKINAAIQAAKAEQEKRRRSANDRLNELT
                     YAINLGIATPEEASALSSWQAYLVLLSRVDFGHAPDIVWPTEPGM"
     CDS             complement(12799..14472)
                     /codon_start=1
                     /product="Tail fiber protein"
                     /label=Tail fiber protein
                     /db_xref="SEED:fig|6666666.356841.peg.21"
                     /translation="MTTKYFALLTTTGAALLANATALGKQLSITQMALGDGGGTLPTPD
                     AAQTKLVNERRRAPLNSLSVDTTNTNQIIAEQVIPEDEGGWWIREIGLYDAAGNLIAVA
                     NCPETYKPLLQEGSGRVQTVRMILIVSSTDAVTLKIDPSVVLATRKYVDDSAIVVKAYA
                     DDAMAKHLADANPHKQYAPLASPALTGTPTAPTAAAGASTTQLATTAFVSTATANHVAA
                     ANPHPQYAPLASPEFTGRVKVTADGAGAVLLKAATANAAVGISFQTNLGVQIAQLTYAG
                     TNTQFYSYLGGNSVALIDSGDITIAPKAGQSLKITTPVTVNGDGNQILLQQSTKAPSSG
                     SYIKGLNSDGVFLWTVGRSESNGWLELGGKGSNRIALADSGDVTIAPGTGKTTKITSTA
                     TLTAPAAGDNSTSAITSGWFAAEIAGIPLPWPQATAPTGWLKCNGQSFDKTLYPKLTAA
                     YPSGTLPDLRGEFIRGWDDGRGVDSGRAVLSVQDATWIQPNIESNTAATTIRIDNVDST
                     FNTDEYSAVSNLPSYEHNGSRARSYVRPRNVAFNYIVRAA"
     CDS             complement(14469..15077)
                     /codon_start=1
                     /product="Tail protein I"
                     /label=Tail protein I
                     /db_xref="SEED:fig|6666666.356841.peg.22"
                     /translation="MSNSLLPPSASDFMRNVASSTQHLSEIAVDLDTLWNPDTCPVSFL
                     PYLAWALSVDRWDKRWSEQTKRQVIKAAWRVHRQKGTIAALRRVVEPFGYLIRITEWWQ
                     TGGVPGTFRLDIGVQDAGITEETYLELERLIADAKPASRHLLGLAIHLDSRGAAPVIVG
                     QYSGDALTIYPYFPETITTTGADVRGGAVHLSDNVSVNA"
     CDS             complement(15070..15966)
                     /codon_start=1
                     /product="Phage baseplate assembly protein J"
                     /label=Phage baseplate assembly protein J
                     /db_xref="SEED:fig|6666666.356841.peg.23"
                     /translation="MATVDLSQLPQPQIIEELDFEVIFQDVKAVMIAAFPADQQASVTA
                     ALELESEPLTVIAQVIAYREMMLRQRINEGAEACLLSYAVSSDLDNLAANLNTARLTIT
                     EETDTADAIMESDSALRLRAQAAFEGLSVAGPTGAYEYFAKSASGKVADAKAISPSPAV
                     VVVSVLSTEGDGSASADLLATVDAALSADDKRPVGDRLTVQSAEIVRYAITAVLYRYPG
                     PESEPIQQAAQQALTSWLGVQGRIGRDVARSAIMAALHVQGVQRVELLEPAQDMVISDT
                     QAAYCTGLTLTEGGSDE"
     CDS             complement(15953..16321)
                     /codon_start=1
                     /product="Putative phage protein"
                     /label=Putative phage protein
                     /db_xref="SEED:fig|6666666.356841.peg.24"
                     /translation="MTATYTGMNPHGTGTLTDADQLWQSVRDILTTPLASRVMRRDYGS
                     LIPDLLDAPQNAVTRLQLMSAAVIALTRWESRISLNAIDIRYSASGAVAAELSGVITAT
                     MQAASTTLTLRSNSDGNG"
     CDS             complement(16318..16899)
                     /codon_start=1
                     /product="Phage baseplate assembly protein V"
                     /label=Phage baseplate assembly protein V
                     /db_xref="SEED:fig|6666666.356841.peg.25"
                     /translation="MSAELMRLLENVLRVGVVTAVDPETWQVRVKSGELLTDWLRWNTI
                     RAGAFNVWFPPAVGEQVWLGCLGGNPETAVIIGSLFSEAHPAPGNSLKEIVITAPDGAR
                     FRYDAVAGALEATGMKTVNVVAAVSVTLNTPVVECTQHLKARTVEITHGGTLAGNVAHS
                     DGAMTSNGVQVDNHRHGGIQPGGSWTSGTQ"
     CDS             complement(16896..17534)
                     /codon_start=1
                     /product="Tail completion protein S"
                     /label=Tail completion protein S
                     /db_xref="SEED:fig|6666666.356841.peg.26"
                     /translation="MTDKRFHALDQVFDDILSGLSPAGRLKTARQVGQALRRSQQQRIR
                     AQKNPDGSAYATRRRKVLRSQKGMVFVWEGQVRHLKNWHGGRGKYGRTITGFDEDRNAI
                     RTFYRSDIERYIEINTQAIRRTTSKKTPMFQRLCSYRFLNMRADTNGASVGFGGMAARI
                     ARVHQYGERDQIGPGAFARYPVRKLLGISPADEQLIQDSVINSLGSAAT"
     CDS             complement(17531..17995)
                     /codon_start=1
                     /product="Phage tail protein # FIG072132 and FIG003673"
                     /label=Phage tail protein # FIG072132 and FIG003673
                     /db_xref="SEED:fig|6666666.356841.peg.27"
                     /translation="MLMLKTDSLRVALTASNTWCRANPEAFTVFVEEGGIETTGETPSF
                     LYRYSLVLFVMNFTGDIDDFTLPLMAWLWQNQPDLLLNPQKNREVTFTTLINNDDSADI
                     LFEIPVRERVRVTRDDNGTLRAEHLPEPRPRLTGGVWDAVLEDATGETAV"
     CDS             complement(18000..18134)
                     /codon_start=1
                     /product="hypothetical protein"
                     /label=hypothetical protein
                     /db_xref="SEED:fig|6666666.356841.peg.28"
                     /translation="MTWGTVALWSDQLLDALDTCNADKAAINDVYLRRLQRLKDAATP"
     CDS             complement(18103..18540)
                     /codon_start=1
                     /product="hypothetical protein"
                     /label=hypothetical protein
                     /db_xref="SEED:fig|6666666.356841.peg.29"
                     /translation="MKLAATLAVLLVLAVGGVLWQTYQRGIDRAHTEALTDSAQQQREL
                     LNEVRALADDARTVLAQVREREQQRYVEGEERREKMREVMQPDTCANTVVPVAVSDSLQ
                     KRAAAVQRANTARPGTAQPDGTHTDARTENTGDVGHGRALE"
     CDS             complement(18537..19082)
                     /codon_start=1
                     /product="Phage lysin (EC 3.2.1.17) # Phage lysozyme or 
                     muramidase (EC 3.2.1.17)"
                     /EC_number="3.2.1.17"
                     /label=Phage lysin
                     /db_xref="SEED:fig|6666666.356841.peg.30"
                     /translation="MKTAIKRCSIALIVALGVTLSPGALRTSQEAQQKTASWEDCRASP
                     YYCPAGVLTVGIGSTGSVQNRPYGNDEIARRWVNDMQRAENCVNGNFNGAAMPQSAFEA
                     MTDTAFNLGCSGLMWFTNRQGSKQRTTIWKHAQAQEWPAMCERLTDFVNSGGQRSAGLV
                     NRRSDFKAWCLRDLAGVP"
     CDS             complement(19066..19368)
                     /codon_start=1
                     /product="hypothetical protein"
                     /label=hypothetical protein
                     /db_xref="SEED:fig|6666666.356841.peg.31"
                     /translation="MGLNDLQRLNDGVTYGLSVMVTGIGVMTVSEKVALAGLVIGVVTA
                     WRAWLFRRRIERAQRRRNELIEQILQQSERRTLNVSERRAVAILHQGDVDDENRD"
     CDS             complement(19337..19564)
                     /codon_start=1
                     /product="hypothetical protein"
                     /label=hypothetical protein
                     /db_xref="SEED:fig|6666666.356841.peg.32"
                     /translation="MLMVVWALQGDTVDLLCYRHYGTSAGVTEQVIAANPGLSRQMFLT
                     AGQAVTLPEISRSTEQETGSYGIKRSSAPE"
     CDS             complement(19558..20049)
                     /codon_start=1
                     /product="Phage head completion-stabilization protein"
                     /label=Phage head completion-stabilization protein
                     /db_xref="SEED:fig|6666666.356841.peg.33"
                     /translation="MSLVAPKRVSDSGDVPEIDDGAAAVSAGEFWPVIVLRDLRLAARI
                     TGGITTTRLMHVTTEAVVHVTDQLASWQQTQQAAGYTALADVPAGQVNGENIKVYRFKR
                     AVYAIARALLLEGYRDVDTTAKGDKATDTFDNQRDDLWRDARWSIADIRGAKRLFAELC
                     "
     CDS             complement(20148..20993)
                     /codon_start=1
                     /product="Phage terminase, endonuclease subunit"
                     /label=Phage terminase, endonuclease subunit
                     /db_xref="SEED:fig|6666666.356841.peg.34"
                     /translation="MAERRGQEDIETEVSRTAHEQILHRLRLHQAALKQVQSDATKAEM
                     KKAMLPEYDGWIDGTLEGDSGRQDEVIVTLMVWAIDCQDSALALKLGRYVVEHGLSLPA
                     DKFRRDAVTVLAEEVSNPVLTLAATDDRADLSGYTAVLDEVAAIVDGKDMPDEVRAKLC
                     KARAFSRRAAVDAQTKADALTLFREAMARNPNAGVKREIATLTRELKKLMPGSSDAPED
                     GAPGDDETTMETAAGETPPAASADAAQPAVKKAAVRNTTARKTTRPTGKSKAARQSAKR
                     "
     CDS             complement(21072..22127)
                     /codon_start=1
                     /product="Phage major capsid protein #Fam0066"
                     /label=Phage major capsid protein #Fam0066
                     /db_xref="SEED:fig|6666666.356841.peg.35"
                     /translation="MENTTRNLFEQYISRQAQLNGVQPNAVAMTFSVEPAIQQRMEQAA
                     QESDDFLEQINVFGVKDQEGQKILIGSKGPIASTNNSSDGTSRRNPTDNHSKEPNSYHC
                     RKVNYDSALSYPQLDAWASRPNFQALISQANARQIGLDRIMIGFNGATYAEKSDRRANP
                     LLQDCGVGWLQKIRNDTAHRIIKNVTLTARDEDNKIVAKGTYGNLDTAVFDAKNSLLDP
                     WHRKAPDLVVIMASDLLTSSNFPRLNALSQSNPNSELIAGQLIISQERVGGLPTFLAPY
                     FPSNAVLITSFKNLSVYYQLGALRRSIVEEPQYNRIATYQSSNDDFVVEDYGKVALIDG
                     IQFAQAAGDSE"
     CDS             complement(22153..22992)
                     /codon_start=1
                     /product="Phage capsid scaffolding protein # Fam Scf032"
                     /label=Phage capsid scaffolding protein # Fam Scf032
                     /db_xref="SEED:fig|6666666.356841.peg.36"
                     /translation="MSGTAKPTRKKFRVAVSGSTVDGREIGRDHLYAMAESYNPQVYGA
                     RVNVEHILSPYPGSDFSAMGDVIALSAEDITDGPLKGRAALYAEIEPTERMKQLTGEGK
                     KIYSSIEIDPQFAATGKPYLRGLAMTDTPASLGTDRLKFAAQQRAQVQAFNNLPGEPVM
                     FTEAMEAELVELSEQRSDEGKQWFSRVMGIIGKGRKSEGEQFAQVREAVENVAQSHADL
                     LDSFNTLKTQQQQDNRTIQTLTRELAALTQKLATQDNSYSQRPAASGGNSGAQLADF"
     CDS             23151..24878
                     /codon_start=1
                     /product="Phage terminase, ATPase subunit"
                     /label=Phage terminase, ATPase subunit
                     /db_xref="SEED:fig|6666666.356841.peg.37"
                     /translation="MIQDAFVRQRAKQLYWQGYPPAEISRLMGINQNTVYAWKKRDEWD
                     ETPPIQRVTHSIDARLCQLAQKPTKTGGDLKEMDALTRQLKTLNDGQPGNAAGGKKPRK
                     RKVKNHFTDEQIAALRTNILDSLAWHQNGWYAQQDQRNRMILKSRQIGATWYFAREALL
                     RALRDDVAYPYQRHQIFLSASRRQAHQFRGFIQKVAEEVDVELKGGDKIVLSNGAELHF
                     LGTSAATAQSYTGNLYFDEFFWVSNFANLRKVAGAMATLKGLTRTYFSTPSSETHEAYP
                     FWTGARWNEKRSKAQKVAFDVSWKALNSGLLCPDKTWRQIVTLQDVIDHGWQYTDLEEI
                     RDENSPDEYNNLYGCEFVRDGESAFNLNLLFSCGADGYDEWPDWKPFASRPMADRGIWI
                     GYDANGSSGNGDSGAISVVVPPLVAGGKFRTIETQQIRGLEFEEQAKVIEALTFKYNVQ
                     HIAIDGTGIGEAVYQIVKKFFPAAVCFLMSVSSKRALVLKMLQVIRAGRWEYDRSEQAL
                     INAFNAVRRVKTPGGIMTYDTDRARGSNHGDLAWATMLAVINEPLGQEQGGGGFAMEF"
     CDS             24878..25930
                     /codon_start=1
                     /product="Phage-related capsid packaging protein"
                     /label=Phage-related capsid packaging protein
                     /db_xref="SEED:fig|6666666.356841.peg.38"
                     /translation="MKRKYKPGARPAMTPGQPDMAATLKSDPGLSAFTFDGPYPVRDGH
                     DLLDNMYCADNGRYYDTPVDWYGLARAFGSASWHQSALYFKRNALTGCFIPHPLLSRQA
                     FSAFVLDWFVFGNGYLERRVNRLGSVLSLRHVPAKYTRRGSDLNTYWFIRQWKDEHAFD
                     TDSVCHVINPDINQEIYGMPEYMGALLSASLSHSADMFRKLYYDNGSHAGCIIYIGASQ
                     VDTESMDNVKKTLKEARGKGAFKNLLLHAPGGGEKGVQIIPFSQISAKDEFLNIKSVTR
                     DDILAAHRVPPQLMGAMPEGNGSFGDVEKAARVFAINELMPVMEALKHVNDWLGMEVIR
                     FNPYALLKAE"
     CDS             complement(26380..27492)
                     /codon_start=1
                     /product="Transcriptional regulator, XRE family"
                     /label=Transcriptional regulator, XRE family
                     /db_xref="SEED:fig|6666666.356841.peg.39"
                     /translation="MFNGSNLRLARLYHELSLEQVAERVDKTRQYIQRLESGSAVPTPD
                     LANKLAAVLLVMPEFFEVQEQSPVNEEIVHFRKRSSTRMATKWATLAKAELYRRLIEVF
                     DEYLNLPAVRFPEMRVHTQEDIEKAAEKCRTDWGLGFGPIDNMTRLAEKLGAFVTSFDS
                     VSDDVDALSVPLSRPFIVRNTAKKSPCRQRFDIAHEVAHLILHEGISTGDRVTESQANR
                     FASALLLPRSAMAKYFPRPIGGRIDWQGLSQFKLTWKVSKAAIIYRAHQLSLLTDAQYK
                     TAFFGLKRKGEAIDEKEDYLIPNEKPELFHKALRFLLTDLSVDIESLAQRLCITPAMLA
                     GLASDNTLDFVPEITTENVVSMSAYRMRTA"
     CDS             complement(27506..28099)
                     /codon_start=1
                     /product="hypothetical protein"
                     /label=hypothetical protein
                     /db_xref="SEED:fig|6666666.356841.peg.40"
                     /translation="MQDYPFPWTFHPQLTEERLSIIAEALLKVQEDTHELLSSSLDDNY
                     TRATCTFGRQKNRIVKLCMSKKYDWLGLSNPNNDYTITIGGIPIRSFSDDPTNPKKPNF
                     FRKNSVDQLFASEDTIPTIWRFVVEKPEFEGEGGRVHFAGYNALEEMLSLWTYGEERVT
                     VLHSTDDTPPAPVKIELDDISASVPEKEKKSDNE"
     CDS             complement(28279..30333)
                     /codon_start=1
                     /product="Phage replication protein # Replication gene A 
                     protein"
                     /label=Phage replication protein # Replication gene A
                     /db_xref="SEED:fig|6666666.356841.peg.41"
                     /translation="MTDLQILEHNGVYHAVREWQREQFSPGEPAGLSYVERSLWHLNKV
                     DHEWRQQYLAGMPDYLAKYFGQRYEKLFKSDEHKGRRRANTFLLRTLGKSVLPRLRTVT
                     ERYQTQQRAAGDLPFPFGDDLEKLPVYDRDNIRALSQRVADFMAASLRDYTENRIRNTG
                     SLTDRHITLLSFRHLGLLTLQAGTQPAYWAQFTKGRHPLSTEKAESGLLRMMSPEWWRA
                     RLKRRRDIQREHMAIAVGQVQKAASPYVSRSTLDEWKEQKRRNREFFKAFDLEDEEGNR
                     VSMDDKVNASNANPAIRRCELMVRMRGFEDLAQEMGCAGEFYTITAPSRYHAVHSGGGF
                     VEQWSGASPRDTQKCLCGVWARIRAELSREEISVFGFRVVEPHHDGTPHWHLLLFMRPE
                     HIEQVRDIMAYHARREDADELNSEKAQKARFHYEPIDPEKGSATGYIAKYISKNIDGYA
                     LDGEADEETGENLRDMAKAVSAWASRWRIRQFQQIGGAPVTVYRELRRLGDKQLDNAAM
                     DAVLAAADVGDWAAYTQAQGGPLVSRDALVVRLSYEITERANQYAEDVQKVQGVYSPLL
                     GERSAIVTRTVQWRIVPKQAAASAGAGVSGGPAAAWSSVNNCTPGLRRRLSELLRLRGF
                     PPDPGLVDVLIRGCSLAISEGRALKMVNGRLEEVGQTGDCELWPGWNWG"
     CDS             complement(30330..31556)
                     /codon_start=1
                     /product="Phage-related protein"
                     /label=Phage-related protein
                     /db_xref="SEED:fig|6666666.356841.peg.42"
                     /translation="MIDSRCFQNDTINVISVSGGKDSLAQWLLAIEHGVQHTAVFADTG
                     HEHPQTIEYLGYLESKLGPIKRVKADFSRQIEQKRKFITNNWYQGLITDLMVDRFEGRW
                     ALASGFRVQKIMLDEDDDTYFDEYLLYPNGRRERFVWPESVPDDRYNTAVLNGFQWIPS
                     VKGLNQQDAEVEAAARVKSALDNLRPTGNPFLDLCMLKGRFPSTKARFCTFELKHEPVR
                     TQVVLPALDEYDEVISWQGVRAQESPARAGLPVWEEDADNTPGLHVYRPILEWKHEDVF
                     AIAKRHGIKPNPLYQQGCSRVGCMPCIHARKSELAEIFSRWPEEIKRVAEWERLVAACS
                     RRGNSTFFPSTHDPRRAEQRIDIITVDEYGIESYRDWAMTTRGGAQFDLLAEANDKSVC
                     SSVYAGVCE"
     CDS             complement(31556..32512)
                     /codon_start=1
                     /product="Methyl-directed repair DNA adenine methylase (EC 
                     2.1.1.72)"
                     /EC_number="2.1.1.72"
                     /label=Methyl-directed repair DNA adenine methylase
                     /db_xref="SEED:fig|6666666.356841.peg.43"
                     /db_xref="GO:0009007"
                     /translation="MSIIATPLKWVGSKARVMDILREHLPVGDRLVEPFAGSCAVMMNT
                     DYPEYLIADINPDLINLYQVLKEDVKDFIDTAEGLFRTANTAESYYRFRQVFNRSKENR
                     ITSAALFLYLNRHGYRGVCRYNRNGGFNVPYGHYASPYFPLAEIQAFAEKARRAKFICA
                     AFGETLQLIRPGDVVYCDPPYIPQTPTASFTSYHTDGFTHNDQYDLCSELSRLAERGIP
                     VIASNSDTHHARSLYHRFDICRFTAPRSVGVAAGEGKQAGEIIAKRLPVSAARSLSKVC
                     DGCGYEGGRHCPDCGLGIGNAIHHVMAASGALNAEPF"
     CDS             complement(32509..32724)
                     /codon_start=1
                     /product="Phage protein"
                     /label=Phage protein
                     /db_xref="SEED:fig|6666666.356841.peg.44"
                     /translation="MDMAQEREAFIRETQIQQARQQSGCAVSAFVCENCDAPIPEARRV
                     AVPGVCLCVYCQGDAELKNKHYRGAL"
     CDS             complement(32733..32963)
                     /codon_start=1
                     /product="hypothetical protein"
                     /label=hypothetical protein
                     /db_xref="SEED:fig|6666666.356841.peg.45"
                     /translation="MKNAEVKTMTVAADGALIELLNKARLEERKDQHLSFSLRLAALAI
                     RAQQRDLSAAELVELMRQESERFEYSAQGLS"
     CDS             complement(33035..33364)
                     /codon_start=1
                     /product="hypothetical protein"
                     /label=hypothetical protein
                     /db_xref="SEED:fig|6666666.356841.peg.46"
                     /translation="MSQSVDHQKWIQRCRDIVFKGESRAQSFWERAALETREIILFSAK
                     PKLKSRHVNYSWHQFTAEERAAIWGAIKRIRAICDETALFGPDDFLKTSNQNGTPNKPN
                     QSPIH"
     CDS             complement(33377..33532)
                     /codon_start=1
                     /product="hypothetical protein"
                     /label=hypothetical protein
                     /db_xref="SEED:fig|6666666.356841.peg.47"
                     /translation="MQKPISIAPFLWQQQTESRIKPEIRHGEGKQGIIIRPDGRRWNPP
                     KGAFNR"
     CDS             complement(33646..33852)
                     /codon_start=1
                     /product="hypothetical protein"
                     /label=hypothetical protein
                     /db_xref="SEED:fig|6666666.356841.peg.48"
                     /translation="MVKKEFAVIRLSKHTSIYRGFSVVEYPRTITNSIKRYRVSREGQS
                     YGLFDALALATGYIDSLHNSVSQ"
     CDS             complement(33863..34135)
                     /codon_start=1
                     /product="Cox"
                     /label=Cox
                     /db_xref="SEED:fig|6666666.356841.peg.49"
                     /translation="MSERVYEVRYPVDAVPYQKFAELIGKSEAAVKGMVDNGKLPLIPW
                     VNPENPNPRRGENWVYIPEFNRAMRDAFMNRPKEQRDAWLLWLGL"
     CDS             34387..34728
                     /codon_start=1
                     /product="hypothetical protein"
                     /label=hypothetical protein
                     /db_xref="SEED:fig|6666666.356841.peg.50"
                     /translation="MIFKINLILFEYRENLDKKREVLIGRNALTHYLFNKKGITFTEAK
                     NISLNDAVIILWNEINSYKIPENIINHIRNHSDNYHHTDNDISKFKKDYPSYIDEEWDP
                     NYADEELRK"
     CDS             complement(34697..34879)
                     /codon_start=1
                     /product="hypothetical protein"
                     /label=hypothetical protein
                     /db_xref="SEED:fig|6666666.356841.peg.51"
                     /translation="MRGDLTDDELIEFLLTFIKKLEARESLKERPEKLRASADSAEREL
                     DELNEFISSVLHQHN"
     CDS             35211..35366
                     /codon_start=1
                     /product="C protein"
                     /label=C protein
                     /db_xref="SEED:fig|6666666.356841.peg.52"
                     /translation="MLKITMHPTFQKYTLWLMTDKTAPEAGQIAPALAHIGPEETKSHQ
                     SNQNIG"
     CDS             35409..36416
                     /codon_start=1
                     /product="Phage integrase"
                     /label=Phage integrase
                     /db_xref="SEED:fig|6666666.356841.peg.53"
                     /translation="MTASESVLMAIKKLDDGRYEVDIRPIGRNGKRIRRRFEKKTEAVA
                     FERYTLSRADKKEWQHGYGVEHRQLSELVELWWLYYGQNLKNGLIEKRHLKRTAAQMDD
                     PEICRINKRSILEFRTRRLYDGISSSTVNRDIYRLSGMFSALIKLEIYTGENPLKELPP
                     LPEKQPTVTFLTESEIARLLDTMEGDQYRLAVLCLSTGARWGEASTLRAEQVMHNRVTF
                     TETKNGKNRTIPISEEVTRIIKTRETGKLFKVDYSAFCEQIKAVKPDIPKGQASHILRH
                     TFASHFVMNGGNLVALQQILGHASIQQTMTYAHLAPDYLQNAITLNPLRGKIAV"
ORIGIN
        1 tgtggttaat gaatggcgta tcgtaacctc tgcgctacgc agacaccgga aacaggagca
       61 tgacaccatg gcagaatggg tgaccggcaa agtgattgag gttgaacact ggacggaaaa
      121 tttattcagt ctccggctgg aggcgccaat agcgcctttt accgccgggc agtttgccaa
      181 actggcgctg gagcgggatg gtgagcgcgt gcaacgcgcc tattcctacg tcaatgcgcc
      241 gagcaacaac agactggagt tctatctggt tgccgtcccg gatgggcagc tcagcccgta
      301 cctgcatcgc tgtcaaccgg gcgacgaagt gctggtaacg caggaagctg ccgggttttt
      361 cgtactggaa gaagtgccgg attgcgacac gctttggatg ctggccaccg gtaccgccat
      421 cggcccttat ctgtcgattt tgcaggaagg gcgcgacctg gcgcgtttcc agcatattgt
      481 cctggtgcat gccgctcgtt acgctcgcga tctgagctat ctgccgctga tgcaacagtt
      541 gcaacaacgt tacggcgata agctgcggct tcagaccatc gtcagccgcg aaacggcgcc
      601 cggttccctg actggacgtg ttccggcgtt gatcgccagc ggcgaactgg aatccgccgt
      661 cggattgccg ctcgaccaaa ccagccacgt catgctgtgc ggcaacccgc aaatggtgcg
      721 cgacacccag caattactga aagaaacgcg ccagatgagc aagcacctgc gccgccgccc
      781 cggtcatatc accagtgagc attactggta aggcgcttac caggaacgga gctgcaacag
      841 ctccgtctcc ttaccaaaac gattagcccc caccgtaccg gcaaacatac cgcaatccag
      901 cagggtcatg accataatca gcatcggcaa aaaacgcccc agcacccact ggcccatgtc
      961 cggcaacatg taccaattgc cgttgcccag catccaggcc agtaccagca acagtgccca
     1021 ccagccgctt ttgccgcgat cgtgcagcct tttcaccagt accgctgccg tcggccatat
     1081 cagcgccacc agcatgaatg ctgcggtctg cgtattcagc aatcctgcgc ccgccagcat
     1141 aaacaacccg accgtcaacg ccagccagat agccatccac aaccagaaat ctcgccgacc
     1201 ggtacggcct cgaaaggaaa aacaccattg ctgtatcgtc atcagttttt attcctgcca
     1261 ccgctttttg gtcacgattt taccttaagc aaaggattta cccgcttttt ttatccgttt
     1321 tttgacaacc gctcacgaat gccgcttaat cacacagcat atctgtcaca cgactgcgtt
     1381 aagtgatgaa gacgccatga aaaacgcctt gccgatcttt tactgtctcg ccaccgcgct
     1441 gttcggagcc ttcccggcgt ggggcgatcc gttgtttcag caaaaaccgc cgaccgcagc
     1501 gccttatctg ctggccagcg cccccacgtt cgatatgaac atcgtgcaat tccgaactcg
     1561 ctacaacctt agcaacccgt cattaccgat tagcgaatac cgggtagtgg ataccggcga
     1621 aaactccccg accctgaccc gagccgccag ccgcatcaac gattacctct actcatccac
     1681 tgcgttggaa aaaggcaccg gaaaaatcag aacgatgcag atcacctggt tgccgcgccc
     1741 caaagatacc gacgaaagcg gccgccgcaa gcaggccatc gactatatgg cggcgttgct
     1801 gcgcaccttc atgccctccc tgactaacga acagagcctg aaaaaggtcg atatgttgct
     1861 gggaaaaggc aaaggccacc gtttctatca gcaaacggaa ggcgcactac gttatgtggt
     1921 ggcagacaat ggtgaaaaag ggctaacttt cgctgttgaa ccgattaagc tcacgctatc
     1981 tgattcgtga tcgaagcagt aattagacac gaaaaacaga gccacagtag ggttcatctt
     2041 ttatactgtc atccagatgg gctgcctgac gcagcccgca ttgactaact cgctattccg
     2101 ctggaggaaa aaagatgcga catcccttag ttatgggcaa ctggaagctg aacggaagca
     2161 ccaacatggt tctcgagctg atcgccgggc tgcgtaaaga gctgagcacg gttgatggct
     2221 gtggtgtcgc cattgcgccg ccggccttgt atctggacca ggccaagcat caactgtcgg
     2281 gcagccgtat cgcgctgggc gcacagaatg tggacgtcaa tctttcaggc gcgtttaccg
     2341 gtgaaacctc tgcggcaatg ttgaaagatc tcggtgccaa atacatcatc atcggccact
     2401 ccgagcgccg gacataccac catgaaagcg atgaattcat tgccaaaaaa tttgccgttc
     2461 tgaaagaaac cggcctgatt ccggtactgt gcatcggtga aaccgaagcc gaaaacgaag
     2521 ccggccagac cgaagccgtc tgcgcccgtc agctggacgc cgtcctgaac acactcggcg
     2581 ctcaggcatt tgaaaatacc gtcattgcct acgaaccggt atgggctatc ggtaccggca
     2641 aatccgccac cccggcgcag gctcaggccg tgcacaaatt cattcgcgat cacatcgcta
     2701 aacaagatgc cgccattgca gcccaggtca tcatccagta cggcggttcc gtcaacgcgg
     2761 ccaacgccgc cgagctgttc acccagccag atatcgacgg cgcgctggtg ggcggcgcat
     2821 cgctgaaagc cgatgccttc gccgtcatcg tgaaagctgc ggcggaagcc aaaaaagcct
     2881 gataccacgc ggcaccggct tggcgggtta aggtgtaacg gaaccgagga ggccatcttc
     2941 tttccgtctc cctttaccag ccgcattgat ggctccactc cggagccatc aatgatttag
     3001 tccatccctc tccaccacga cgagtggcgt tccttctcca ccgccgcgac tatttttagc
     3061 cgttaccctt agattcatca ttctgtcatc tcttgccttt aggtttaccg cccacaacct
     3121 tcgtaacaat tctttaaggc gagtaaaaaa taatgatcaa gaagaccctg atttcctctc
     3181 tggtaatgac actggttgcc gctaatgcca tcgctgccga tgccgcctac gttcgtcagg
     3241 ccgcaggcga tatcactcag ccaggcggcg cacgccgtct cagtgccgat caaactgaaa
     3301 tgctgaaggc ggcgctcaat gccaaaacgg caaaaaacgt cattctgctg attggcgatg
     3361 gcatgggaga ctctgaaatt acggtagccc gcaactatgc aatgggcgcc ggcggttttt
     3421 tcaaaggcat tgacgctttg ccattaaccg gccaatacac ccattactca ctggataaaa
     3481 aaaacccgca aaccggatta cgtgaccgac tccgctgcgt ccgccacggc ctggtcaagc
     3541 ggtgtgaaaa acctacaacg gcgcgctggg cgtggatgtt gacggcaaag accacaaaac
     3601 cctgctggaa atcgccaaag cagcgggcaa agccaccggc aacgtctcca ccgccgaatt
     3661 ggaagacgct accccagcag ccatgatctc gcacgtcact tcccgtaaat gttacggccc
     3721 ggaaaaaacc agccaacaat gcgccaccaa tgcgcaggaa aacggcggcc gcggttctat
     3781 tgccgaacaa ctgctggttg cccgcgccga cgtcacgctg ggcggcggtg cggcgacatt
     3841 caaagaagtg gccaaggcag gcaaatatca gggtaaaacg ctgctggaac aggcgcaggc
     3901 gctgggctat aacctggtga ctgatctgga cagccttagc gcagtgaacg tggccagtca
     3961 gaacaaaccg gtgctgggcc tgtttgccga cggcaatatg ccggtacgct ggcaggggcc
     4021 gaaagcctcc tatcacggca atctcgacaa gccggttatc acctgcgagc caaatgcaca
     4081 gcgtacagct gcaacgccga cactggcaca aatgacagac aaagccatcc aattgttgag
     4141 taagaacaaa aatgggtttt tcctgcaggt tgaaggcgcg tctatcgaca aacaagacca
     4201 cgccgccaac ccatgcggcc agatcggcga aacggtagat ctggatgaag cggttcagaa
     4261 agcgctggaa tttgcccgtc gtgacggcaa tacgctggtg atcgtcaccg ccgaccacgc
     4321 gcactccagc cagattatcg agaatggcgc caaagcgccg ggtctgacgc aggcgctgaa
     4381 caccaaagac aacgccgtca tgaccatcag ctacggcaat tcggaagagg aatcacaggg
     4441 tcataccggc actcagctac gtatcgcggc ttacggcccg cacgccgcca acgtggtagg
     4501 gctgactgac cagactgacc tgttctacac catgaaaagc gccatgggcc tgaaataacc
     4561 ctcgggcagc catccctaca ccattgtcct aaaacaacgg gccggataac ggcccgttgt
     4621 ttttttatcg agggttgacg cacgcaaacc taacgcaacg cgctgggaat ctgttgcgta
     4681 atacaatgaa tattaccgcc gcccagcaga atttcacggg caggtacgcc ggttatcaaa
     4741 tagtcgggaa acatctgttg cagcagcgca tgcgcatcgg cgtcagtacg tgtatccagc
     4801 aacggataga taatttgccg gttgctgatc aggaagttga cataagaacc cgccagccgc
     4861 gacccggcgt tacgctcgat ggcattgcct tcatcgacgc ccgctgtttc ctccggcgtg
     4921 gcgtacagtg gccccggcgc cggcaatttc cagatgttca acgcccggcc tttagcatct
     4981 cgtgcctgtg agagcacccg atacgccgcc tgcgaacggt ggtactgcgg gtcggtttca
     5041 tcgtcagtcc agtgcaaggc cacttcaccg gggcgcacga aacagcacat attgtcgata
     5101 tggccgtcgg tttcgtcgtt atacacgccc tcttccagcc agatgaaaga agacacgccg
     5161 agataatccc gcaacagttg ttcaatctgc gcctggttca agtgcggatt gcggttcggg
     5221 ttcagcagac actcggcggt ggtcagcaac gtaccttcgc catcggtatg gatggaaccg
     5281 ccttccagaa tcagcggtgc ggcgtaacgc gcatcgccgt gatacgccag cacctgcgcg
     5341 gcgacctgtt cgtcacgacg ccagtcttgg tacaacccgc ccaatgcgcc gccccaggcg
     5401 ttgaaccgcc agtcgacgcc gcggcgttcg ccggcctcat tcagcaccac agtcggcccg
     5461 gtgtcgcgca tccaggcgtc atcgctttcc atctccacca gcgtgacacc ggccggcatg
     5521 acgcttttgg cgagtgtcat ttggtcacgc ggcacgccca tgatgaccgg cgtggtctgt
     5581 gcaatagcgg cggcaacggc ggcaaaaata cgctgcgctg ggatgacgtc accttgtgat
     5641 cgccagttgt cacggcgata cggccacaac atccatacgg cctcatgcgg cgcccattcc
     5701 gccggcatgg cgaacccgtc ctgcaacggc gtagtcagtt cggacatcat ttatctccag
     5761 gtcttgccgt cggacgtacc gatcacgcca tacatgtccg gacggcgatc gcggaacagc
     5821 ccccaggacg cgcgctgtgc ggcgatggcg tccaggtcga actcgtgcac cagcaccgtt
     5881 tccgccgtct tgtcggcttg cgccaccagc gccccggttt gatcagcgat gaatgacgaa
     5941 ccgtagaacg tcatttccag gccatcgata tatttgctgg cctcggtacc gatacggttg
     6001 gaggcgatca ccggaaccag gttggcagcg gcgtgcccct gctgcacacg agtccagtgc
     6061 ggctgactgt cgatatccgg atacgccggt tcggaaccga tggcggtcgg atagaaaatc
     6121 agctccgccc ccttgagtgc cagacagcgg gccgtttccg ggaaccactg atcccaacag
     6181 atgcctacgc cgactttggc gtagcgggtc tgccatactt tgaaaccggt atcacccgga
     6241 ataaagaact gcttttcctg ataggccggg ccgttcggaa tatgggtttt gcgatacacg
     6301 tccagcacgc tgccgtcggc gtcgatcatc accagcgaat tgtagtaggc gttattggcg
     6361 cgctcgaaga aactcaacgg caacaccacc tccagcgcct tcgccagcgc ggcgaagtgt
     6421 ttgataagcg cgctggtttc caaatcctgg gccagcgcat aatgttccgg gctctgatcg
     6481 atgcagaagt aaggcgcggc aaacagttcc tgaatcagga tgatttgcgc cccctgagca
     6541 tgagcctgcc gcaccagttt ttcggcattt tcgatattct ttggcaaatc ccaggtgcag
     6601 gccatctgag tggcggcgac ggtaactttt gtcatgcgag aacctcaata attttgtttc
     6661 ttcccaccgt cagacggcaa cgcatgctga cgacgaaacc ccggtaaaaa gtgtaggcca
     6721 acaatgaccc cgatgcgccg aaacaaccat cgccaacggc gtcatgccgt atcgcgcaac
     6781 aaaaatccgg cgacagcatt atgcccgtga atcatgacgg cgaggacatt tcccccgctt
     6841 taatgtcccg tcgtttttat ggctgatcag tgtttgtaga cgcattaata acaaatcccg
     6901 cccagggagg tatggcgtgt ttaacattcg ccacatcccc ctgcgagcgg gatttcatcg
     6961 ccggacgcgc acgcatccgg cggttacatc agaacaattt cttggcggta tcaagccaat
     7021 cgccccggaa tgggcgcttc atgttctcga tggcgtcgat aatatcatgg tgaaccagtt
     7081 tttcattctg gataccgacg caacggccgc cgtacccctg ctgcagcagt tcgatagagt
     7141 aggcgcccat gcgcgaggcc agaatacgat cataggcgac cggagaaccg ccgcgctgga
     7201 tatggcccag tacggtggcg cgggtttcac gcccggtttc cgtctcaatg taatgcgcca
     7261 gatcagcgac atcacacatc agctcggtaa tcgccacgat ggcgtgcttc ttccctttgg
     7321 cgatacccgc tttgatctct tccaccaaat cttctttttt gaagtccact tccggtacga
     7381 cgatgaattc gcaaccaccg gcgatcgcgg cggccagcgt caggtcgccg cagtggcggc
     7441 ccatcacttc gacaatggag atacgctggt gggaagacga ggtatcgcgc aggcggtcaa
     7501 tggcttccac caccgtttcc agcgccgtga aatagccgat ggtgtagtct gtccccgcca
     7561 cgtcattatc aatagtgccc ggcaggccga tacagggaaa acccatttcc gtcaggcgtt
     7621 tggcccccat gtaggaaccg tctccgccga taaccaccaa cgcatccaga ccacgtcgct
     7681 tcatgttttc cacacaaacc tgacgcacag actcctcacg gaaagccgga aaacgcgcgg
     7741 aacccagaaa cgtcccgccg cggttgatga catcggacac gctatagcgg tccagttgtt
     7801 tcatacggtc ttcgtacaaa cccagatagc cgtcatagat cccgaacact tccagacctt
     7861 ccgtcagcgc agcgcgcacc acgccccgga tggcagcgtt catccccggc gcatcaccac
     7921 cactcgttaa cactccgatt ctattaatca tgacaacctc tggatttgta gatgtaaatt
     7981 cgcagatttt ctatcgcgag gccgggtcaa tactggcgag cctctaacct tttataagca
     8041 tattataaca aaaggcctta gctgaattga ttcaggtcag gcataagttc ctataaatat
     8101 ccattgcatg tcacactttt acaacacctt tcaatgacag cgagatgacc gagcttagcg
     8161 ttaccagcgt ccccgctgct caagcggaac aatcgaaata gggtcttggt ggataataac
     8221 gtcggaaccg ggaaaacgtt tgagcaatgc ctgctccagc gcatccgcaa tactgtgaga
     8281 ctcaatcaac ggcagttggt catccatttc caggtggagc tggataaaac gggtcggccc
     8341 cgaacggcga gtacgcagtt ggtgcgcacc gttgacgccg ggccatgaag cgatcattcg
     8401 ggtgatttcc tgccgttctt catccggcag ggcgcgatcg agcaaagatt ggatagcgtc
     8461 ataggccata cgcaatgcac tggacaggat atagacgcca atccccaatg caaataccgc
     8521 atccgcccag ccaatgccgc gccagctcaa gaacaatgcc accagaatgg cgccgttcat
     8581 cagcacatcg gactggtaat gcaacatgtc cgcccgcacc gcctggcttt gggtcttgcg
     8641 gatcacccaa cgctggaaac tgaccagcag aatagtgatc accaatgcaa aaaccgtaat
     8701 ccacatcccc aattcagggc cgttcaatgg ttgaggcgta ctcagccgct gtaccccgtt
     8761 aagcaacagg aacagcgccg atccggaaat aaacatactt tgtgccagcg ccgccaacga
     8821 ttcagcctta ccatggccga aggtatgttc cgtatcggca ggctgcaatg agtaacgcac
     8881 gaccagcaga ttcaccagcg acgcggcgat gtccaccagc gaatccacca atgacgccag
     8941 caaactcacc gaaccggtgt accaccaggc atacaccttc ataccgaata aaaacagcgc
     9001 cgtggcggtg gccagaaaag cggccattgt caccaggcga gcgtaatgat aattcatacc
     9061 catctcctgc caaaacgagg aaacaagtat aacgaattcc ggcaccgaag aaccgtgaca
     9121 ctttacagag cacgccagcc gacgtgccct atcaccaaga tccggctact catggcgctg
     9181 ccgcagcagt ttttgcaggc gctcctgctc ccagcgggac atcctcccgc gaagccagaa
     9241 aatcttgacg ccttttaaca ccaccagccc tccccagatc agcggtaccc agaaaaacca
     9301 gcggtgcccc gacccggtca tctggttcac gataaacaac accacgctga ccaacaccat
     9361 gaggatcagg ctgcgccaga aacggctttc ctgacgtacc tgccgccgcg catcttgaat
     9421 gcgctgttcc agcgactcgc cgctaaccgt ctgttcgctt tcttccgtca tcagttcggc
     9481 cacattgacg ccaaacgcgg cggcgatcgc gctcaatgtc tccaggctgg cgcgctcgcc
     9541 attctcgata cgctggatgg ttctgacgct cagggaggag agctccgcca attgttcctg
     9601 agaccaggct cgggcaaggc gtaatgtctt aatcgaattc atgttcgttt tcctgttgtt
     9661 gtgaaaaaca gtggtgaaaa acagctgtga aaaacgatgc cagcttatgc cagccttccc
     9721 acccgcgaca cgacagcaac ccgacaggca cacgacagta acccgacacc tgctggaatc
     9781 agggccgagg cgccttccac gacgcctcga caaaccggag ggcgggcgta aaatttcacg
     9841 tcacacacag gattgcgccc gttcggcgcc attagatagc ttgaggatat catgagaaaa
     9901 cgccccgctt cccgctttct ggtcatcaat gcgcaactgc atgtgttgct gtttcgcttt
     9961 gaacataagg atgacgccat ggctggccga gcctactggg caacgcccgg cggagcgctc
    10021 gaagcgggtg aatccttcac tcaggcggct atccgtgaac tgtgggaaga aacgggtctg
    10081 aacatcaccg accctggaga ggaaatcgcc caacgggaat tcgtcatgat gatgccgaat
    10141 ggcaaagaag tcttggcgga cgagcgctac ttcattattc gcattcagta tcacgatctg
    10201 gattgcagcc agtggaccga gcacgaaaaa aaattatgcg gcgctaccac tggtggggaa
    10261 tggatgaact acgccagacg caggaaacgg tgtatcccga caatctgccc gcgttactgg
    10321 agccttattt gtcgataacg cggtaaagac cataaaaaac ggcccaatgg gccgttcaga
    10381 tatcgtgttt attgcaaaca cattatgcgc ggtagtcacg ccgctctgac aatatagtta
    10441 aaagcgatgt tgcgggggcg agttgaaacc cagacagaac cctcgctcgc ataaacggta
    10501 ttgctcgctg taccgttaac accgttgtct cgggatgcct gctctgtcag gtcaatatta
    10561 tttggtgcgc ggaaggcccc tgccggagca gaaattgatt ttgcagccgt gtcagcttcg
    10621 gcatagccca tcccgatata aacgccaatg ttgtcaacat cactgccgtt gtaatccatc
    10681 atgccggttc gtaaatacgt gggattttgc gctgtcaaaa tcgccctgcc agcatcaaca
    10741 cccctaccat catcccagcc gcggataaat tcgccgcgga gatcgggcaa aactccggag
    10801 ggatagaccg tcgccagctt cggatacagg gccttgtcga acgactgtcc attacatttc
    10861 agccagccgg tgggcgcggt cgcctgcggc cagggtagtg ggatacccac aacatcggcg
    10921 atattcattt tttgagccag acccgacgcg gtgctggctg acaaattcgc cgttgcagta
    10981 gaaacaaacg ctgttgtcgc caactgcgtg gtattggcac cggctgccgc cgtcggtgcc
    11041 gtcggcgtgc cggtaagcgc tgggctggcg agtggggcat actgcggatg cggatttgcc
    11101 gctgcgacat gattcgccgt tgcagtagaa acaaacgccg ttgtcgccaa ctgcgtggta
    11161 ttggcaccgg ctgccgccgt cggtgccgtc ggtgtgccgg taagcgccgg gctagcgagt
    11221 agcgcatact gcgaatgcgg atttgccgct gcgacatgat tcgccgttgc ggtagaaaca
    11281 aacgccgttg tcgccaattg cgtggtattg gcaccggctg ccgccgtcgg tgccgtcggt
    11341 gtgccggtaa gcgccgggct ggcgagtagg gcatattgtt tatggggatt ggcgtcggcg
    11401 agatgtttcg ccatcgcatc atcggcgtag gcttttacca cgacagcgct gtcatccacg
    11461 tacttgcgag ttgccagtac caccgacggg tcaattttta gcgtgaccgc gtcggtactg
    11521 ctgacaatca agatcatgcg caccgtttgc acccggccgg agccttcctg tagcagcggt
    11581 ttgtaggttt ccgggcagtt ggcgacggca atcagattgc catcgttatc atacaggccg
    11641 atttcccgga tccaccaccc gccctcgtcc tcggggatca cctgttcagc gataatctga
    11701 ttggggttgg cggaatcgac actcagcgaa ttcagtgcgg cgcgacgctt ttcattaatc
    11761 aacgtggttt gtgtggtgct cggcgttggc agcgaaccac cgccatcccc tacgcccatt
    11821 cgcgcgattt ccagttgctt ccccaatgcc gtggcattgg ccagcttgtt ttcgcccact
    11881 tgagtgagca acgctatgta ttttgtcgtc atatcgtctc gtatctgaat aagtgaaaaa
    11941 tagtaacatc acgatatatg cagccaagat caccgcagct ttctgtcaaa tcgtgatatt
    12001 tcggtgagga gcgagacgtc attatgctga ccgtcatcag gaatggcgcg tcatggacgt
    12061 tgttaccggc atacaacaac atcgcggcac aacatcaatc acaacaaatt gaaaaaaaga
    12121 tattaatccg agataagcac tgaaaagaaa aacggccctc gggccgtttg cgttatcaca
    12181 ttcccggctc cgtcggccac acaatgtctg gcgcatgacc gaaatccacc cggcttaata
    12241 acaccagata agcctgccaa gaactcagtg cagacgcttc ttccggcgtg gcgatcccca
    12301 aattgatggc ataagttagt tcattcaacc gatcatttgc gctgcgtcgg cgtttttcct
    12361 gttccgcttt ggctgcctgt atcgccgcat taattttggc tgcgtcatcc gttacccacc
    12421 tgccatcgcg ccatacatca aacgcactcg tcggcgccaa caccgtcaac tcgctgggta
    12481 attcgcccat ctgagtcacc cgtaacggct gccgggtttg tgtgttgtag gccaattgcc
    12541 ccctatagtc cggtacatgc acccaacaaa gcccgtcgtc actgcggcgc aaacccagcc
    12601 catcaggagg aagcgaaggc gcatcaagat atccccccgc aggcaagcca gtaccttgca
    12661 tcaggtattc ataaccggcg tgcagatatt catgcgtatc gggatcagcg aaatagacca
    12721 ccagccagcc gggtacggta gttagcccgt ttgcccctaa ttcagcagcc tgcgctgtaa
    12781 tggcatattt tttagtcatc atgcagccct cacgatgtag ttaaaggcga cgttgcgggg
    12841 gcgaacatac gaacgcgccc gtgatccgtt atgttcatat gacggcagat tactgaccgc
    12901 tgaatactcg tcagtattga acgtgctatc gacattatcg attctgattg ttgtcgcggc
    12961 agtgttgctt tcgatgttcg gctgaatcca cgttgcatcc tgcacagaca acaccgcacg
    13021 cccgctatca acccccctcc catcatccca gccgcgaata aactcgccgc gtaaatccgg
    13081 caatgtgccc gacggatacg ctgctgtcag tttgggatag agggttttat cgaacgactg
    13141 accgttacat ttcagccagc cggtgggggc ggttgcttgc ggccagggca gcgggatgcc
    13201 ggcaatctct gctgcaaacc agcccgatgt aatggcgctg gtgctgttat ctcccgccgc
    13261 cggggcggtg agcgtggccg tgctggtaat ttttgtggtt ttcccagttc ctggggcgat
    13321 agtgacatcg ccgctgtctg ccaacgcgat gcggttgctc cctttgccac ccagctcaag
    13381 ccagccgttg ctttcgctac gtccgacagt ccacaagaat acgccgtcac tgttaagccc
    13441 tttaatatac gagccagacg atggtgcctt tgtgctctgc tgcaaaagga tttgattacc
    13501 gtcgccgttg acggtgactg gtgtggtaat tttcagtgac tgacctgctt taggggcaat
    13561 agtaatatcg ccgctgtcta tgagcgcgac gctattgcca cccaagtagc tgtaaaactg
    13621 cgtgttcgtg ccggcatacg tcagttgcgc tatctgaaca ccgagattgg tctgaaacga
    13681 tatccctaca gcagcattgg cagttgcagc tttgagtaac acggcgccgg cgccatcagc
    13741 ggttactttt acacgcccgg taaactcagg gctggcaagc ggcgcatact gaggatgcgg
    13801 atttgccgct gcgacatgat tcgccgttgc ggtagaaaca aacgcagtgg tagccaactg
    13861 cgtggtactg gcaccggctg ccgctgttgg ggcggtgggt gtgcccgtca acgccgggct
    13921 ggcgagtggg gcatattgtt tatggggatt ggcgtcggcg agatgtttcg ccatcgcatc
    13981 atcggcgtag gctttcacca caatcgcgct gtcatccacg tacttgcggg tcgccaatac
    14041 tacagatgga tcgattttca gcgtgaccgc gtcggtgctg ctgacaatca aaatcatacg
    14101 caccgtttgc acccggccgg agccttcctg tagcagcggt ttataggttt ccgggcagtt
    14161 ggcgacggcg atcagattgc ccgctgcgtc gtacaagccg atttcccgga tccaccaccc
    14221 gccctcgtcc tcggggataa cctgttcagc gataatctga ttggtgttag tcgtgtcaac
    14281 gctcagggag ttcaacggcg cccggcggcg ttcgttgacc agtttggttt gtgctgcgtc
    14341 gggagtcggc agggtgccgc caccgtcgcc gagcgccatt tgggtgatag acaactgctt
    14401 ccccagcgcg gtagcgtttg ccagcagcgc ggcgccagtg gttgtcagca gggcaaaata
    14461 ttttgtggtc atgcgttcac gctcacgtta tcagaaagat gtaccgcacc gccacgcacg
    14521 tcggcgccgg ttgtggtaat ggtttcagga aagtagggat agatggtcag cgcgtcgccg
    14581 ctgtactgcc cgacaatgac cggcgccgcg ccccggctat caagatggat agccagcccc
    14641 aagagatggc ggctcgcagg cttggcatca gcaattaagc gttccagctc cagataggtt
    14701 tcttcggtga tgccggcatc ctgcacgccg atatccagcc ggaaagtgcc gggtacgccg
    14761 ccggtttgcc accactcggt aatacgaatc agatagccga acggctcgac cacccggcgc
    14821 agggcggcga tggtgccctt ctggcggtgt acccgccatg ccgccttgat cacctgacgt
    14881 ttggtctgtt ctgaccagcg cttatcccag cggtcaactg acaacgccca agcgagataa
    14941 ggcaggaatg ataccggaca ggtgtcaggg ttccataacg tatccagatc gaccgctatc
    15001 tcactcagat gctgggtaga actggcgaca ttgcgcataa agtcactggc cgacggtggc
    15061 aataggctgt tactcatcgc tgccgccctc agtgagagtc aatccggtgc agtacgccgc
    15121 ctgcgtgtcg ctgatcacca tgtcttgcgc cggttccagc agctcgacac gttgcactcc
    15181 ctgcacatgc agcgccgcca tgatggccga gcgagccaca tcacgcccga tgcgcccctg
    15241 tacgccaagc catgacgtta atgcctgctg cgcggcctgt tggatcggtt ccgattccgg
    15301 cccaggatag cggtacaaca ccgccgtaat ggcatagcgc acaatctcgg cgctttgcac
    15361 cgtcaggcgg tcgccgaccg ggcgtttatc gtcggcggac agggcggcat caacggttgc
    15421 cagcagatca gccgaggcac tgccgtctcc ctctgtggat aacaccgaca ccactaccac
    15481 cgctggggac gggctgatcg ctttggcatc cgccaccttg ccgctggcac ttttggcgaa
    15541 atactcatac gcgccggtcg gcccggccac gctcaacccc tcaaaggccg cctgcgcccg
    15601 caaccgtagc gcgctgtcgc tttccattat cgcgtcggcg gtgtcggttt cctctgtaat
    15661 ggtcagccgg gccgtgttca ggttagccgc cagattatcc agatcggatg atacggcgta
    15721 gctgagtagg caggcttcgg cgccctcgtt aatccgctgg cgtaacatca tttcccgata
    15781 ggcgatcacc tgcgctatca cggttaacgg ttcggactcc agttccaacg cggcggttac
    15841 ggatgcctgt tgatcggcag gaaaggcagc aatcatcacc gctttcacat cctgaaagat
    15901 gacttcgaag tccagctctt caatgatttg cggctggggg agctgtgata aatcaaccgt
    15961 tgccatcgct gttactcctg agcgtaaggg tggtgctggc cgcctgcatc gttgcagtaa
    16021 taacgcccga taactctgct gctaccgccc cggatgctga gtaacgaata tcgatggcat
    16081 tcagcgagat acgcgactcc cagcgcgtca gggcgataac agccgcactc atcaactgaa
    16141 gccgcgtcac agcgttctgc ggcgcatcca gcaggtcagg gatcaggctg ccgtaatccc
    16201 ggcgcatcac cctggatgcc agcggcgtag tcagaatgtc gcgcaccgac tgccagagct
    16261 gatcggcatc ggtcagggtg ccggtgccat gcggattcat gccggtatag gtcgcggtca
    16321 ttgtgtgcca ctcgtccagc taccgccggg ctgaatgccg ccgtggcggt ggttatccac
    16381 ctggacgccg ttagaggtca tcgcgccgtc agaatgcgcc acattaccgg ccagggtgcc
    16441 gccgtgggtg atctccacgg tgcgggcctt caggtgctga gtgcattcca ccaccggcgt
    16501 attcagtgtg acgctgaccg cggccaccac gttgacggtt ttcatgccgg tggcttccag
    16561 cgcaccagcc acagcgtcat accgaaaccg ggcaccgtcc ggcgcggtga tcacaatctc
    16621 cttcaggctg ttgcccggtg ccgggtgggc ctcgctgaac agactgccga tgatcacggc
    16681 ggtttccgga ttaccgccaa ggcagcccag ccacacctgt tccccgacgg cgggcgggaa
    16741 ccagacgtta aacgccccgg cgcgtatggt gttccagcgt agccagtcgg tgagcaattc
    16801 accgctctta acacgtacct gccaggtttc cgggtcaact gctgtgacga cgccgacgcg
    16861 caagacgttt tccagtaatc gcatcagttc agcgctcatg tggcagcact ccccaggcta
    16921 ttgatcaccg agtcctggat cagctgctca tcagccgggg aaatccccaa cagtttacgc
    16981 accgggtagc gggcgaaggc gcccggcccg atctggtcac gttcaccgta ctgatgcacg
    17041 cgggcgatac gggcagccat gccgccaaag ccgacgctcg cgccgttggt atcggcccgc
    17101 atgttgagaa agcgatagct gcacaagcgc tgaaacatcg gggttttctt gctggttgtg
    17161 cggcgtatcg cctgcgtgtt gatctcgata taacgctcaa tatcgctgcg gtaaaacgtg
    17221 cggatagcgt tgcggtcttc atcaaaaccg gtgattgtgc ggccgtattt tccccggccg
    17281 ccgtgccagt ttttcaggtg gcgcacctgg ccttcccaga caaagaccat tcctttttgc
    17341 gaacgcaaca ccttgcggcg gcgggttgca taggccgagc cgtccgggtt cttctgcgca
    17401 cggatgcgct gttgctgact gcgtcgcagc gcctgcccga cctgacgggc cgttttcagc
    17461 cgcccggcgg gtgacaggcc ggaaagaatg tcgtcaaaca cctgatccag tgcgtgaaac
    17521 cgtttatccg tcataccgct gtctccccgg tcgcatcctc aagcacagcg tcccataccc
    17581 cgccggtgag gcgcggacga ggttcaggca gatgttcagc tcgcagggtg ccattatcat
    17641 cccgcgtgac cctgacccgc tcgcgcaccg ggatttcaaa aaggatgtcg gcgctgtcgt
    17701 cgttgttgat cagcgtggtg aatgtcacct cgcggttctt ttgcgggttc agcaacaggt
    17761 cgggctggtt ctgccatagc caggccatta acggtaaggt gaaatcgtcg atatcaccgg
    17821 tgaagttcat cacgaacagc accagcgagt agcggtacag aaacgacggc gtttccccgg
    17881 tggtttcaat gccgccctct tccacaaaca ccgtgaaggc ttccgggttg gcccggcacc
    17941 aggtattgga tgccgtcagt gcaacgcgca gcgagtcggt tttcagcatg agcattcccc
    18001 tatggtgtgg cggcgtcctt caggcgttga agacgacgca ggtatacatc gttgatggcg
    18061 gctttgtccg cgttgcaggt gtccagcgca tccagcagtt gatcactcca gagcgcgacc
    18121 gtgccccacg tcaccggtgt tttcagtgcg ggcgtcggtg tgggtgccgt caggctgagc
    18181 ggtaccgggt cgtgcagtat ttgcacgctg gacggcggcg gcgcgttttt gcaagctgtc
    18241 gctgacagca acaggcacca cagtgttagc gcacgtatcg ggctgcataa cctcacgcat
    18301 cttttcacga cgttcttccc cttcgacata acgctgttgc tcacgctcgc gcacctgcgc
    18361 cagcacggtt ctggcatcgt cagccagtgc ccggacttcg tttaacagtt cgcgctgttg
    18421 ttgggcgctg tcggtcagtg cctcggtatg cgctcggtcg atgccgcgct ggtaggtttg
    18481 ccagagcacg ccaccgacgg ccagcaccag cagcacggca agggtggctg caagtttcat
    18541 ggcacacccg ccagatcgcg caagcaccag gctttaaagt cgctgcgacg attgaccagc
    18601 ccggcggagc gctggccgcc gctgttgaca aaatcggtca gccgttcaca catcgcgggc
    18661 cattcctgcg cctgggcatg tttccagata gtggtgcgct gcttgctgcc ctgccggttg
    18721 gtaaaccaca tcaggccgct gcaaccgagg ttaaacgccg tgtcggtcat ggcttcaaac
    18781 gccgattgcg gcatggcggc gccgttaaaa ttgccgttga cgcagttctc tgcccgctgc
    18841 atgtcgttaa cccagcggcg ggcaatctcg tcattgccgt acggccgatt ttgtacgcta
    18901 ccggtagagc caatgcccac cgttagcacg ccggcggggc agtaatacgg cgacgcccgg
    18961 cagtcttccc aactggctgt tttctgctgt gcttcctgcg aggtgcgcaa tgcgccgggg
    19021 gacagcgtga cgccaagcgc gacaatcagc gcaatcgaac agcgtttaat cgcggttttc
    19081 atcgtcaacg tcaccttgat gcaaaatagc caccgcgcgg cgttccgata cattcagcgt
    19141 gcggcgctcg gactgctgca aaatctgttc aatcagttca ttgcgacgtc gttgtgcgcg
    19201 ctcgatacga cgccggaaca gccaggcgcg ccacgcggtg acaacaccga tgaccagccc
    19261 cgccagcgcc actttttcac tgacggtcat taccccgatg ccagtcacca tcacggacag
    19321 gccataggtc acgccatcat tcaggcgctg aagatcgttt aatcccataa ctgcccgttt
    19381 cctgttctgt cgagcgggaa atttcgggca gcgtgacagc ctgcccggcc gtcagaaaca
    19441 tctggcggct caatcccgga ttggcggcga tcacctgctc ggtgacaccg gcggatgtgc
    19501 cgtaatggcg ataacagagc aaatccaccg tatcgccctg aagcgcccag accaccatca
    19561 gcacaactcc gcaaaaaggc gtttggcgcc gcgtatatcg gcgatactcc agcgcgcatc
    19621 acgccataaa tcgtcacgct ggttgtcaaa ggtgtccgtt gccttgtcgc ctttggccgt
    19681 ggtatccaca tcgcggtatc cctccagcag cagcgcgcgg gcaatggcat aaaccgcacg
    19741 cttgaagcgg tacaccttga tgttttcgcc gttgacctgt ccggccggaa cgtccgccag
    19801 tgcggtatat ccggcggcct gttgcgtctg ctgccagctc gccaactggt cagtcacatg
    19861 caccaccgct tccgtggtga cgtgcatcag gcgagtggtg gtgataccgc cggtgatacg
    19921 ggcggccaga cgcagatcgc gcaggacgat taccggccag aactccccgg cgctgaccgc
    19981 cgccgcgccg tcgtcaatct ccggcacgtc gccgctgtcg ctgacacgtt ttggcgctac
    20041 caggctcatg ctcaactctc ccaaaagtca ggcggtgggc accgggcaaa aagaccgtat
    20101 acgggcagat cacccggtgc gccgcctgtc ggacggggcc gaagtcgtta acgtttggca
    20161 gactgacggg cggctttact tttgcccgtc ggccgtgtgg ttttccgcgc cgtggtgtta
    20221 cgcacggcgg ctttttttac cgctggctgc gcggcgtcgg ctgaagccgc aggcggtgtc
    20281 tccccggcgg ctgtttccat ggtcgtctca tcgtcgccgg gcgcaccgtc ttccggcgcg
    20341 tcactgctgc ccggcatgag ctttttcagc tcccgcgtca gggtggcgat ttcccgtttt
    20401 acccctgcgt tgggattgcg ggccatcgct tcccggaaca gtgtcagcgc atcggctttg
    20461 gtttgtgcat ccaccgctgc gcggcgtgag aaggcgcggg ctttgcacag cttggcgcgc
    20521 acttcatccg gcatgtcttt gccgtccaca atcgcggcca cttcatccag cacggcggtg
    20581 taaccgctca ggtcagcgcg gtcgtcggtg gcggccagtg tcagtaccgg gttgctcact
    20641 tcctcagcca gtaccgttac cgcatcacgg cggaacttgt cggcaggcaa agacaggcca
    20701 tgctcaacga cgtaacgccc cagttttagc gccagtgcgc tatcttggca gtcgatcgcc
    20761 cacaccatca gggtgacaat cacttcatcc tgtcggccgc tgtcgccttc cagcgtgcca
    20821 tcaatccagc cgtcgtattc cggcagcatg gcttttttca tctccgcttt ggtcgcatca
    20881 gattgcacct gtttcagcgc cgcctgatgc aggcgcaggc ggtgaagaat ttgctcatgg
    20941 gcggtgcgtg acacctccgt ttcgatgtcc tcctggcccc ggcgctcggc catgacccgc
    21001 tgaaaatgtc gttgtgctgg tgtcagcatg gtgtgttctc cggttgggcg gagtgttacc
    21061 ccgccgggct gttactcgct gtcgcctgct gcctgtgcga actgaatacc gtcgatcagt
    21121 gccaccttgc cgtagtcctc caccacaaag tcgtcgttgg acgattggta ggtggcaatc
    21181 cggttgtact gcggctcctc gacgatgctg cggcgcaacg cccccaactg gtagtaaacc
    21241 gacagatttt tgaacgaggt gatcagcacc gcgttggacg ggaagtacgg tgccaggaag
    21301 gtcggcaggc cgcccacacg ctcctggctg ataatcaact gaccggcgat cagttcacta
    21361 ttggggttgc tctggctcag cgcattgagg cgcggaaagt tgctggacgt cagcaggtcg
    21421 gatgccatga tcaccaccag atccggcgct ttccggtgcc acggatccag caggctgttt
    21481 ttggcgtcaa acacagcggt gtcgaggttg ccgtaggtgc ctttggcgac aatcttgttg
    21541 tcttcgtcgc gggcggtcag cgtgacgttt ttaataatgc ggtgcgccgt atcattgcgg
    21601 attttttgca gccagcctac gccgcaatcc tgcaacagcg gattggctct gcggtcggat
    21661 ttctcggcat aggtggcgcc gttgaaaccg atcatgatgc ggtcaaggcc gatttgccgc
    21721 gcattcgctt ggctgatcag cgcctgaaag ttcggccgcg atgcccaggc gtccaactgc
    21781 gggtagctga gcgccgagtc gtaattcact tttcggcaat ggtagctgtt cggctctttg
    21841 gaatggttgt ccgtcggatt gcggcgggac gtgccgtcgc tgctgttatt ggtgctggca
    21901 atcggccctt tgctaccgat caggattttc tgaccttcct gatccttcac gccaaacacg
    21961 ttaatctgtt ccaggaagtc atcgctttcc tgtgctgcct gctccatacg ctgctggatg
    22021 gccggttcga cgctaaaggt catcgccacg gcattcggct gcaccccgtt aagctgcgcc
    22081 tgacgtgaaa tgtactgttc aaaaagatta cgggtcgtgt tttccatgtt cgcttgtctc
    22141 gcttaacggt acttaaaagt cagccagctg tgcgccgctg ttgccgccgc tggccgccgg
    22201 acgctggctg taactgttat cctgcgtcgc cagcttctgc gtgagtgcgg ccagttcgcg
    22261 ggtcaacgtc tggatagtgc ggttgtcctg ctgctgttgg gttttcagcg tgttgaaact
    22321 gtccagcagg tcagcatggg actgggcgac gttctccacc gcctcacgca cctgggcgaa
    22381 ctgttcacct tccgatttac ggcctttgcc gataatcccc atcacgcggg aaaaccattg
    22441 cttcccctcg tcgctgcgct gttcggacag ctcgaccagc tccgcttcca tcgcttcggt
    22501 gaacatgacc ggctcaccgg gcagattgtt gaatgcctgc acctgtgccc gttgctgtgc
    22561 tgcgaatttc aggcgatctg tgcccaggct ggccggggta tccgtcatcg ccaggccgcg
    22621 cagatacggt ttgccggtcg cggcaaactg cggatcgatt tcgatactgg aataaatctt
    22681 cttcccttcg ccggtgagct gcttcattcg ctcggtgggt tcgatttccg catacaacgc
    22741 ggcacggcct tttagcgggc cgtcggtaat gtcttccgcg ctcagcgcaa taacatcacc
    22801 catcgcactg aaatcactgc ccggataggg ggaaagaatg tgctcaacgt taacgcgggc
    22861 accgtatacc tgcgggttgt agctttccgc cattgcatag aggtggtcgc gtccgatttc
    22921 acgcccgtca acggtggaac cggagacggc aacccggaat tttttgcggg tcggtttagc
    22981 tgtaccgctc atgcctgtag tcctgtcctg tggtatctgt gacatcatga ttgcagagcc
    23041 taactccctg tctcaacgcg gttttgttgt cggcgtaggg ccagagccga aagtgagcga
    23101 aaggcggatc gcgcgcgggg taatcttccc ggcaaagggg gaaaccgcgc atgattcagg
    23161 acgcatttgt acggcagcga gcaaaacagc tttactggca gggttacccg ccagcggaaa
    23221 tttcgcgcct gatggggatt aatcaaaaca cggtgtatgc ctggaaaaag cgcgacgaat
    23281 gggacgagac gccgcctatc cagcgcgtaa cgcattctat tgatgcgcgg ctgtgtcagt
    23341 tggcccaaaa gccgaccaaa accggcggcg acctgaagga aatggacgcg ctgacccggc
    23401 agttaaaaac gctgaacgac ggccagccag gcaatgccgc aggcggcaag aaaccccgca
    23461 agcgcaaggt gaaaaatcac ttcactgacg aacagattgc cgcgttgcga accaacattc
    23521 tcgactcact ggcctggcat caaaacggct ggtatgccca gcaggatcaa cgcaaccgta
    23581 tgatcctaaa gtcccgccag atcggcgcca cctggtactt tgcccgtgaa gcgttattgc
    23641 gggcgctgcg tgatgacgta gcttaccctt atcagcgcca ccagattttt ctgtccgcct
    23701 cacgtcggca ggcgcaccag ttccggggct ttatccagaa ggtggcggaa gaggtggacg
    23761 tcgaactaaa aggcggtgac aagatagtcc tgagcaacgg ggccgagctg cattttctgg
    23821 ggacgtctgc cgcgacggca cagtcttaca ccggcaacct gtatttcgat gagtttttct
    23881 gggtcagtaa ctttgccaac ctgcgcaagg tggccggggc gatggcgacc ctgaaagggc
    23941 tgacgcgcac ctacttttcc accccgtcga gcgaaaccca tgaagcgtac ccgttctgga
    24001 caggcgcacg ctggaatgag aagcgcagca aggcacaaaa ggtcgcgttt gatgtgtcat
    24061 ggaaagcgct caatagcggt ttgctatgtc cggataaaac ctggcgtcag attgtgacgc
    24121 tacaggacgt catcgatcac ggctggcaat acaccgacct ggaagaaatc cgcgacgaaa
    24181 acagcccgga tgaatacaac aacctgtacg gctgtgagtt cgtccgcgat ggtgagtccg
    24241 cctttaacct caacctgtta tttagctgcg gcgccgacgg ttacgacgag tggccggact
    24301 ggaagccctt tgcatcgcgc ccaatggccg atcgcggcat ctggattggc tatgacgcca
    24361 acggcagcag cggcaacggc gacagcgggg cgatctcggt ggtggtaccg ccactggtgg
    24421 cgggcggcaa attccgcacc atcgaaaccc agcagatacg cggcctggag tttgaagaac
    24481 aggcgaaagt gatcgaagcg ctgaccttca aatacaacgt gcagcatatc gccattgatg
    24541 gcaccggcat cggcgaagcg gtctaccaga ttgtgaagaa attcttcccg gcggcggtgt
    24601 gcttcctgat gtcggtgtca tccaaacgcg ccttagtgct gaaaatgctt caggtcattc
    24661 gtgccggtcg ctgggaatac gaccgcagcg agcaggcgct gatcaatgcg ttcaacgccg
    24721 tgcggcgcgt caagacgccg ggcggcatca tgacttacga caccgaccgc gcacgcggct
    24781 ctaatcatgg cgatctggcc tgggcaacca tgctggccgt catcaatgaa ccactcggcc
    24841 aggagcaagg cggcggtggc tttgcgatgg agttctgatg aaaagaaaat ataaacccgg
    24901 cgcccgtccg gcaatgacgc ctggtcagcc ggatatggcc gccactctga aaagcgatcc
    24961 ggggctgagc gcgtttacct ttgacggccc ttatccggtc agggacggcc acgacctgct
    25021 ggataacatg tattgcgccg ataatggccg ttattacgac accccggtgg actggtacgg
    25081 gctggctcgc gcgtttggta gtgcgtcatg gcaccagtcc gcgctgtact tcaaacggaa
    25141 tgcgctgacc gggtgcttta tcccgcaccc gttattgtcg cgtcaggcgt tctccgcctt
    25201 cgtgctcgac tggtttgttt tcggcaacgg ttatcttgaa cgccgggtca accggctggg
    25261 cagcgtgttg tccctgcgcc acgttccggc aaagtacacc cggcgcggca gcgacctgaa
    25321 tacctattgg tttatccggc agtggaagga tgaacacgcg tttgataccg acagcgtgtg
    25381 ccacgtcatc aacccggata ttaaccaaga gatctacggt atgccggagt acatgggcgc
    25441 gctgctgtcg gccagcctgt cgcactccgc cgatatgttc cgcaagctct actatgacaa
    25501 cggctcgcac gccgggtgca ttatctacat cggcgcatcc caggtggata ccgaaagcat
    25561 ggataacgtg aaaaaaacgc tgaaggaagc acgcggcaaa ggcgcgttta aaaacctgct
    25621 gttacacgcg ccgggcggcg gtgaaaaagg ggtacagatt attcccttca gccagatatc
    25681 cgccaaagat gaattcctga atatcaaatc agtgacgcgc gatgacattc tggcagcgca
    25741 ccgcgtaccg ccgcaactga tgggcgccat gccggaaggc aacggttctt ttggcgatgt
    25801 ggagaaagcc gcgcgggtgt tcgccatcaa cgaactgatg ccggtgatgg aagcgctgaa
    25861 gcatgtgaat gactggctgg ggatggaggt gatccgcttc aacccttacg ccctgttgaa
    25921 agccgagtga taccccgccg ctgccgccgc actcacgcgg cggtttttat tcaaaaactt
    25981 tcacgtcacc tgcgtactat ctcttttcag ttcaacggct aacgccacca ttccccgccc
    26041 gtataaaacc gtctcagcgc cgcgctgtcg agcgctctca ccggatgacg cgccgcgtct
    26101 cctggaggga aatacacacg cagcagggcg ggaaatgggc cggattcggc acatcaaagg
    26161 gggatcccta cctacccccc atcgcggggg ctgttccccc gtcaccagcg cgctgctctc
    26221 gcttcatttt ttgtgcaagt gcagaaaccg gcccggcgcg cgagcgtacc gggccgaaag
    26281 ggggaaaata gcatcaaaaa agttgtgcaa aattgtgcac tattgtgcgg taacttcacc
    26341 aaaaaaatcc cgccgaagcg ggatacatta gtgaaaaaac taggcagttc tcatgcgata
    26401 agcagacata gacacaacat tttctgtcgt gatttcaggt acaaaatcta aagtattatc
    26461 gcttgctaac cccgctagca tggctggagt gatgcataaa cgctgcgcta aagattcaat
    26521 atcaactgac agatccgtta gaagaaacct caatgcctta tgaaaaagct ctggcttttc
    26581 atttgggatt aaataatcct ctttttcatc aatagcttcc cccttacgtt tcagaccaaa
    26641 aaatgccgtt ttatactgag catcagttaa gagagaaagc tgatgcgccc tgtaaattat
    26701 tgctgcttta ctcactttcc acgtcaattt aaactggcta aggccttgcc agtcgatacg
    26761 tccacctatt gggcgaggaa aatactttgc catcgccgag cgaggcagaa gcaaggcgga
    26821 agcaaatcgg tttgcttgcg attccgttac cctgtccccc gtcgaaatac cttcatgcaa
    26881 aatcaaatgt gcaacttcgt gggcaatatc aaaacgctga cgacacggtg actttttagc
    26941 cgtgttccta acgataaatg ggcgactcaa aggaacagac agcgcgtcca catcatcaga
    27001 aacagaatcg aaagatgtaa caaacgcccc caacttttca gcaaggcggg tcatattatc
    27061 gatcggccca aagcctaacc cccaatcagt acggcatttt tcagccgcct tctctatgtc
    27121 ctcttgagta tgcaccctca tttcaggaaa cctgactgct ggcaagttta aatactcatc
    27181 gaaaacttca attagacggc gatacaattc agctttagca agcgtcgccc acttagtagc
    27241 catgcgtgta gaactacgtt tgcggaagtg aacgatctct tcattcactg gagactgctc
    27301 ctgcacttcg aaaaattcgg gcatgaccag caagacggca gctaatttat tcgcaagatc
    27361 aggagtaggc acagcagagc cggattccag ccgctgaata tactggcggg tcttatcgac
    27421 ccgctcagct acttgctcca gtgataactc gtgatacaga cgagccaatc gcaaattaga
    27481 accgttaaac acttttcacc tactgttatt cgttatcgct tttcttttcc ttttcaggaa
    27541 cagaagcgct gatatcatcc agctcaatct taacaggtgc tggcggggta tcatctgtag
    27601 agtgcagcac tgttacccgt tcttcgccat aagtccacaa agagagcatt tcttccagtg
    27661 cattataacc tgcaaaatgc acgcgcccac cttcaccttc gaactccggc ttctcaacaa
    27721 caaagcgcca aatcgtaggg attgtatcct ccgacgcaaa caactgatca acactattct
    27781 tacggaagaa attaggtttt ttaggattag ttggatcatc gctaaaagaa cgaataggaa
    27841 tgccaccaat agttattgtg tagtcattat tcggattaga gagtcccaac cagtcgtatt
    27901 ttttcgacat acacagcttc acgattcggt tcttttggcg tccaaaagtg catgttgcgc
    27961 gtgtgtaatt atcatcaagc gaagaagaca aaagttcatg tgtatcttcc tgaactttaa
    28021 ggagcgcctc tgcaatgatc gacaggcgtt cttcggttaa ctgtgggtga aacgtccaag
    28081 ggaatgggta atcttgcatc gggtcacttt cctttcagtg caaaaattaa actttgtcaa
    28141 ccggaatgat ggtgcagttt ttttattttg tcaactaacc cctgttaatt tttacagcac
    28201 atctcaaaat ataaatacta agctaacaat ctattagtgg ttccgttttt ctcatccacc
    28261 aacgaacacc accacacctt atccccagtt ccaccccggc cacagctcgc aatcccctgt
    28321 ctggcctact tcctccagcc tgccgttaac cattttcagc gccctgccct cgcttattgc
    28381 cagactgcag ccacgaatca gcacatcgac cagccccgga tcaggcggaa aaccgcgtaa
    28441 gcgcaacagt tccgataatc gccgccgtag gcccggcgta cagttattga cagaactcca
    28501 agctgcggcg gggccgccag aaaccccggc ccccgctgac gcggcggcct gtttcgggac
    28561 aatcctccat tgcaccgttc gggtgacgat cgcggagcgc tcccccagta atggcgaata
    28621 caccccctga accttttgta cgtcttcggc atactggttc gcacgttccg taatctcata
    28681 ggacaaccgc acaacaagtg cgtcacgcga cacaagaggg ccaccctgcg cttgggtgta
    28741 tgcggcccag tcgcccacat ctgctgccgc cagcaccgca tccatcgccg cgttatccag
    28801 ttgcttatca cccaggcgtc gcagctcgcg gtaaaccgtt accggcgcac cgccgatttg
    28861 ctgaaactgc cggatacgcc agcgcgacgc ccaggcagat accgcctttg ccatgtcgcg
    28921 caggttttcc ccggtttcct cgtcggcctc gccatccagt gcgtagccat caatattctt
    28981 gctgatgtac ttggcgatat aacccgtggc gctgcctttt tccgggtcaa tcggttcata
    29041 atgaaagcgg gctttttgcg ccttttcact gttcagctca tcggcatctt cccggcgggc
    29101 gtgatacgcc atgatgtcgc gtacctgttc gatgtgctcc gggcgcatga acaacaacaa
    29161 atgccagtgc ggcgtgccat cgtgatgcgg ctcgacgacc cgaaagccaa acacgctaat
    29221 ctcttcgcgt gacagctccg cccggatacg cgcccacaca ccgcacaggc atttctgtgt
    29281 gtcgcgtggg ctggcaccgc tccactgttc gacgaacccg ccgccgctgt gtactgcgtg
    29341 ataccgtgac ggcgcggtga tggtgtaaaa ctccccggca cagcccattt cctgcgccag
    29401 atcctcaaag ccgcgcattc tcaccatcag ctcacaacgg cggatcgccg ggttggcgtt
    29461 gctggcgtta accttgtcat ccatagagac acggttaccc tcttcatctt ccagatcaaa
    29521 cgccttgaaa aactcccggt tacgccgttt ctgctctttc cattcatcca gcgtggagcg
    29581 cgagacatag ggtgacgccg ctttttgtac ctggccgacc gcaatcgcca tatgctcccg
    29641 ctgaatatcg cggcggcgtt ttagccgtgc ccgccaccac tccggtgaca tcatgcgtaa
    29701 caggccggat tcggcttttt cggtcgataa cgggtggcgg cctttggtga attgcgccca
    29761 gtaagccggc tgcgttccgg cctgcaaggt cagcaggcca aggtgacgga atgacagcag
    29821 ggtgatatgc ctgtcagtca ggctcccagt gtttctgatg cggttttcgg tgtagtcgcg
    29881 caacgatgct gccatgaaat cggccactcg ttgcgataag gcgcggatgt tgtcacggtc
    29941 ataaaccggc agcttttcca gatcatcacc gaacgggaac ggcagatctc ccgcagcacg
    30001 ttgttgcgtc tggtatcgtt cggtaacggt gcgcaggcgt ggcaatacgc ttttccccag
    30061 ggtacggagt aaaaacgtat tggcccggcg gcgccccttg tgctcatcgg atttaaacag
    30121 cttttcataa cgctggccga aatacttcgc cagataatcc ggcattccgg ccagatactg
    30181 ctgacgccat tcatgatcga ccttattcag gtgccagagg ctgcgttcaa catagctcag
    30241 ccctgcaggc tcgccggggg aaaactgttc acgctgccat tccctgacag cgtgatacac
    30301 gccgttatgc tccagaatct gtaaatcagt cactcacaaa ccccggcata gacactgcta
    30361 caaaccgact tgtcgtttgc ctctgccaaa aggtcgaatt gcgccccccc gcgtgtcgtc
    30421 atagcccaat cgcggtaaga ctcaatgccg tattcatcaa cggtaattat gtcgatccgc
    30481 tgttccgctc tacgtggatc atgggtggaa ggaaaaaacg ttgaatttcc tctgcgtgag
    30541 caggcggcta ccagtctttc ccactcagca acacgcttta tttcttcagg ccagcggctg
    30601 aatatttccg ccaattcaga cttacgggca tggatacacg gcatacaccc aacccggcta
    30661 cagccttgtt gatatagcgg gttaggctta atcccatgac gtttagcaat ggcgaagaca
    30721 tcttcatgtt tccattcaag gatcgggcga taaacatgca aaccgggagt gttatccgca
    30781 tcttcttccc atactggcaa accggcccgg gcgggtgact cttgagcgcg aaccccctgc
    30841 cagcttatta cctcgtcata ttcatcaagc gcaggtagaa ctacctgagt acgcacaggt
    30901 tcgtgcttaa gttcgaaggt gcaaaatcga gctttagtgc tggggaatct acccttcaac
    30961 atgcaaagat cgaggaatgg attgccagtt ggccggagat tatcaagagc tgacttaacc
    31021 ctagcagcag cctcaacctc agcatcttgc tggttcagac cctttacaga tggaatccac
    31081 tgaaacccat ttaagacagc agtgttataa cgatcatcag gcacagattc aggccataca
    31141 aaacgctccc gcctaccatt agggtataaa agatactcat caaaataagt atcatcgtcc
    31201 tcatctaaca ttattttctg gacacggaaa ccggatgcca gcgcccagcg accctcgaat
    31261 ctatccacca tcaggtcagt gatcagcccc tgataccagt tattcgtaat aaattttctt
    31321 ttctgctcta tctgtcttga aaaatcagcc tttactcgtt tgattgggcc taatttgctt
    31381 tccagatagc ccagatactc aattgtctgc gggtgctcat gccctgtatc agcaaagaca
    31441 gcggtgtgct gcactccgtg ttcaatggcc agaagccact gagccaagct gtcttttccg
    31501 ccagacacgc tgataacgtt gatggtgtcg ttctgaaagc aacgggaatc aatcatcaga
    31561 atggctccgc atttaacgcg ccggacgccg ccattacatg atgaatggca ttacctatcc
    31621 ccagcccaca gtcagggcag tgcctaccac cttcatagcc gcacccgtcg caaactttcg
    31681 acagactgcg ggcagcagac accggcagac gcttagcaat gatttccccg gcctgtttac
    31741 cttccccagc agcaacgccg acgctacgcg gcgcggtgaa acggcagata tcaaaccggt
    31801 gataaaggct gcgtgcgtgg tgggtatcac tgttggacgc gatgacaggg atcccgcgtt
    31861 cggccagacg tgataactca ctgcacaggt catactgatc gttgtgggtg aaaccatcgg
    31921 tgtgataact ggtgaagctg gccgttggcg tttgcgggat atacggcgga tcgcagtaca
    31981 ccacatcgcc ggggcggatc agttgaagtg tttcgccaaa cgcggcgcag atgaattttg
    32041 cacgacgggc tttttcggca aatgcctgaa tctcggccag tggaaaataa ggcgatgcat
    32101 aatgcccgta agggacgtta aacccaccgt tgcggttata cctgcaaacg ccccggtatc
    32161 cgtgccggtt caggtaaaga aacagtgccg cagatgtgat gcgattctct ttgctgcggt
    32221 taaatacctg ccggaagcgg taataacttt ctgccgtgtt cgcggtgcgg aacagacctt
    32281 cggcggtatc aataaaatcc ttcacatctt ctttgaggac ctgatacagg ttaatcaggt
    32341 cggggttgat atcggcgatc aggtactccg ggtaatcggt attcatcatg accgcacaag
    32401 acccggcgaa cggctcaacc agacgatcac caaccggtaa atgctcacgc aggatatcca
    32461 tcacgcgggc tttgctgccg acccatttca gcggtgtggc gataatgctc ataaggcacc
    32521 ccgatagtgt ttgtttttca gttcagcatc accctggcag tacacgcaca gacacacacc
    32581 cggaacggcc acgcggcggg cttcgggtat gggggcgtcg cagttttcac agacgaatgc
    32641 agaaacggca caacccgact gttgccgggc ctgttggatt tgtgtttcac ggatgaacgc
    32701 ttcgcgttcc tgagccatat ccatggagtc catcagctca acccctgagc ggagtactca
    32761 aaacgttctg actcctggcg catcagttcc accagttcag cggcagagag atctctttgc
    32821 tgggcgcgga tagccagcgc agcaagacgc agtgagaagg acaaatgctg gtctttgcgc
    32881 tcctccagtc tggctttatt cagcagttcg atcagtgcgc catcagcagc gacggtcatg
    32941 gtctttactt cggcattttt cattacggtt tccttttttc aggtaatgcg aatccctgcc
    33001 cgataaaggg catttattcg ttgctatggg ttaattaatg aataggtgac tggttcggct
    33061 tattgggtgt gccgttttga ttactggttt tcagaaaatc atcagggcca aatagcgcag
    33121 tttcatcgca gatagcccgg atgcgcttaa ttgcgcccca gatagcggcg cgctcttccg
    33181 ccgtaaactg atgccatgag taattgacat ggcgcgattt cagctttggc tttgcggaaa
    33241 aaaggataat ctcacgcgtt tccagtgcag cacgctccca aaatgactga gcgcgggatt
    33301 cacctttaaa cacgatatcc ctgcaacgct gtatccattt ctgatgatcg acagattgag
    33361 acatgcgccc tcctgattac cgattaaacg cccctttcgg cgggttccag cggcggccat
    33421 ccggccgaat aatgatgccc tgcttgcctt ctccgtggcg tatttctggt ttgatacggc
    33481 tttccgtctg ttgctgccag aggaaaggcg caattgagat tggtttttgc attgttcctc
    33541 ctattggtaa ccgcccacag atagacggtt gcaaataggt gccgggatat ttagccacgc
    33601 ccggccgtgg tttctctggt gttgttttta ttctttatca ctgcactatt gagatacgct
    33661 gttatgtaag ctgtcgatat aaccggtagc taatgccagc gcatcaaata aaccgtaaga
    33721 ctgcccttcc ctgctaacgc gatatcgctt aattgagttt gtgattgttc ttggatattc
    33781 aacaactgaa aagccacgat atatactggt gtgcttactc aggcgaataa cagcaaattc
    33841 ctttttaacc ataattattc acctataacc ccagccataa taaccatgcg tcacgctgtt
    33901 ctttcggcct gttcataaag gcatcgcgca tagcacggtt aaattccggg atataaaccc
    33961 agttttcacc gcgacgagga ttggggtttt caggattcac ccacggaata agcggcaatt
    34021 tgccattatc aaccatgcct tttactgccg cttccgactt accgatcaat tccgcaaatt
    34081 tctgatacgg aacagcatca acaggatagc gaacctcata aacgcgttca ctcatcacaa
    34141 acctcgcttt tcattttgcg ttattgaata tgtgccggga tttttagcca cgcccggcgc
    34201 gtggttatgg taggattgct gtgctcacat caatcaacta ccgacaaagg agtctatttt
    34261 atggacttaa atctaactgc atgttttagg gtttacgaga aaacattcaa caatatcgca
    34321 actgccctca aaataaataa cccagataac acttatcttt gcgccccttt aactcttcga
    34381 actcttgtga tctttaaaat taaccttata ctttttgagt accgcgaaaa ccttgataaa
    34441 aaaagagagg ttctcatcgg tagaaatgca ttaactcatt atctttttaa taaaaaaggg
    34501 ataacattta ctgaagcaaa aaatatttca ctaaacgatg cagtaatcat tttatggaat
    34561 gaaataaatt catataaaat ccctgaaaat attataaatc acattagaaa ccatagtgat
    34621 aattatcatc acaccgataa cgacatctct aagttcaaga aagactaccc ttcctatata
    34681 gatgaagaat gggatcctaa ttatgctgat gaagaactga ggaaataaat tcattcagct
    34741 cgtctaactc cctttcagca ctatctgcac tggcccgcaa tttttctggt ctttccttga
    34801 gagattcgcg ggcttccaat ttcttaatga aagttagcaa gaactcaatc aattcatcat
    34861 cagtaagatc accacgcata atgctgggtc ctactttatt ctcaccttcc atccgttcac
    34921 ccctccccct caccgtgata ctctcttccg atcaccaatc acttacatcg gctttcagtt
    34981 gcttgtgttc gcggttggtt tttcatgccc tcattggaac ccatataggt gccaatgagg
    35041 ggaatttaga tcctatatgg gttccatgtc aaatgaaact tagcgaaaaa gtaaaggcac
    35101 taagagaagc agagggactt agccagtcaa gattttgtga aatcatagac ttacctctaa
    35161 gcactcttaa aaaatatgag actggcaact ttgagccagg gggaaatgct ttgctcaaaa
    35221 tcacaatgca tcccactttc caaaaataca ccctgtggtt aatgacggat aaaacagcac
    35281 cggaagctgg gcagatcgca ccggccctcg cgcacattgg gccagaagaa acaaaatctc
    35341 accaatcaaa ccagaatatt ggataaatat ttacataagt tacatctttg atattgcata
    35401 tcaggatgat gactgcatcg gagagtgttc ttatggcaat taagaaactc gatgatggtc
    35461 gatatgaagt ggacattcgc ccgataggac gtaacggaaa acgcatccgg cggcggtttg
    35521 agaaaaagac agaagcggta gcattcgaac gctacacgtt gtccagagcg gacaaaaaag
    35581 agtggcagca cggttatggc gttgaacatc gccagctcag tgaactggtt gaattatggt
    35641 ggctttacta cggccagaat ctgaagaatg gtttgataga aaagcgtcac ctgaaacgga
    35701 cagcggccca gatggacgac ccggagatat gccggataaa caagcgttca attctggaat
    35761 tccgtacccg gcgattatat gacggtatca gctcttcaac ggtcaatcgg gacatctacc
    35821 ggctttccgg gatgttttcg gcactgataa aactggagat ctacaccggc gagaatccct
    35881 taaaggaatt gccaccgttg ccagaaaagc agccaacagt cactttcctg actgaatcag
    35941 agattgcacg cctgctggat acgatggaag gcgatcaata ccggctggct gtgctgtgcc
    36001 tgagtaccgg cgcaaggtgg ggagaagcca gcacattacg ggctgaacag gtgatgcata
    36061 accgggtgac gtttaccgaa accaagaacg gtaaaaacag aaccattccg atatcggaag
    36121 aggttacgcg gatcatcaaa acccgtgaaa ccggaaagtt gtttaaagtg gactactcgg
    36181 cattttgcga gcaaatcaaa gcggtaaaac ccgatattcc gaaaggccag gcatcacaca
    36241 tactacggca cacatttgcc agccattttg tgatgaacgg gggaaatctg gtggcattac
    36301 agcagatttt aggtcatgcc agcattcagc aaaccatgac ttacgcgcat cttgcaccgg
    36361 actatctgca aaacgctata acactcaacc cattacgggg aaaaatagcg gtttag
//
