# Supplementary material for: May the Phage be With You? Prophage-Like Elements in the Genomes of Soft Rot Pectobacteriaceae: Pectobacterium spp. and Dickeya spp
Source: Front Microbiol. 2019 Feb 14;10:138. doi: 10.3389/fmicb.2019.00138 (PMC6385640; doi:10.3389/fmicb.2019.00138)
Supplement: Supplementary file 2 [file Data_Sheet_2.ZIP › Supplementary_prophagesGENBANK_files/Genbank FILES _SRP_prophages/phiDso1.gb]

LOCUS       Exported               57617 bp ds-DNA     linear   UNK 02-AUG-2018
DEFINITION  phiDso1.
ACCESSION   .
VERSION     .
KEYWORDS    .
SOURCE      phiDso1
  ORGANISM  phiDso1
REFERENCE   1  (bases 1 to 57617)
  AUTHORS   .
  TITLE     Direct Submission
  JOURNAL   Exported Aug 2, 2018 from SnapGene Viewer 4.2.3
            http://www.snapgene.com
FEATURES             Location/Qualifiers
     source          1..57617
                     /organism="prophage phiDos1"
                     /mol_type="genomic DNA"
                     /note="/genome_id=6666666.357427"
                     /note="/genome_md5="
                     /note="/project=robertczajkowski_6666666"
                     /db_xref="taxon:6666666"
     CDS             complement(1..1272)
                     /codon_start=1
                     /product="Integrase"
                     /label=Integrase
                     /db_xref="SEED:fig|6666666.357427.peg.1"
                     /translation="MSLNDTKIRNLKPPVTPIKLSDSHGLYLHVKPTGSRLWYFRYYFF
                     GKETRIALGAYPLISLSEARQKRDELRKLLAQNINPAQQRAAEKAARSPAKNFKTVALS
                     WHKSNRTWSENHAARLLASMNNHIFPIIGHLPITELKTRHFIDLLKGIEKKGLLEVAAR
                     TRQHMCNIMRHAAHQELIEHNPAANLDGIIAPPVKRHYPALPLERLPELLASIEDYQQG
                     RELTRLAVSLTLHLFIRSSELRFARWSEIDFRNKIWTIPATREAIPGVRYSGRGAKMRT
                     PHIVPLSRQSIAILKQIREISGHQELIFPGDHNPYKPMCENTVNKALRLMGYDTKDEIC
                     GHGFRAMACSALMESGLWSQDAVERQMSHQERNSVRAAYIHKAEYLDARKAMMQWWSDY
                     LDTNREGYVAPYIYAQQHKTARTV"
     tRNA            complement(1437..1509)
                     /product="tRNA-Asn-GTT"
                     /note="/transl_table=11"
                     /db_xref="SEED:fig|6666666.357427.rna.1"
     CDS             1894..2169
                     /codon_start=1
                     /product="Nitrogen assimilation regulatory protein Nac"
                     /label=Nitrogen assimilation regulatory protein Nac
                     /db_xref="SEED:fig|6666666.357427.peg.2"
                     /translation="MNLRRLKYFVKIVDIGSLTQAAEMLHIAQPALSQQVATLESEMEK
                     QLLVRSRRGVTPTEAGKILYSHAQTILNQCEQAKHAVNGVRQTVSV"
     CDS             complement(2236..3741)
                     /codon_start=1
                     /product="D-serine/D-alanine/glycine transporter"
                     /label=D-serine/D-alanine/glycine transporter
                     /db_xref="SEED:fig|6666666.357427.peg.3"
                     /db_xref="GO:0006810"
                     /db_xref="GO:0016020"
                     /translation="MLLLTILTSYITWVTGRDLINALTLADTIRKSHYMTEQTHHVPDA
                     TGHSDLRRNLTNRHIQLIAIGGAIGTGLFMGSGKTISLAGPSIIFVYMIIGFMLFFVMR
                     AMGELLLSNLNYKSFSDFSADLLGPWAGFFTGWTYWFCWVVTGIADVVAISAYAQFWFP
                     DLSQWISSLLCVLLLLTLNLATVKLFGEMEFWFAMIKIVAIVALIVIGAVLVIMQFTSP
                     SGAVASVTNLWQDGGMFPKGLSGFFAGFQIAVFAFVGIELVGTTAAETKNPKVVLPRAI
                     NAIPIRIIMFYVFALMMIMSVTPWSHIAADRSPFVEMFVLVGLPAAASVINFVVLTSAA
                     SSANSGVFSTSRMLFGLARQGDAPARFGRLSKRAVPSAGLFFSCLCLLSGVVLIYLIPN
                     VMTVFTLVTTVSAILFMFVWSIILCSYLVYRRNRPQLHQTSSYKMPWGIVMSWVCLAFF
                     AFVMVLLTLQPDTLQALMVTPVWFVVLAIAYQFIRRRRVNALA"
     tRNA            3968..4040
                     /product="tRNA-Lys-CTT"
                     /note="/transl_table=11"
                     /db_xref="SEED:fig|6666666.357427.rna.2"
     CDS             complement(4347..4709)
                     /codon_start=1
                     /product="hypothetical protein"
                     /label=hypothetical protein
                     /db_xref="SEED:fig|6666666.357427.peg.4"
                     /translation="MVIFLTRCIGTYGIIKPNFVMSPACVAAQNQSLAPPRRLPFVTGD
                     TMNNNDFPTASTPETLAHEVSCLKVLMTLMLKSIGQADAGKVIVSMEKYIAQLEDPAQA
                     EIFGTTIKQIKTVYRR"
     CDS             complement(4964..5125)
                     /codon_start=1
                     /product="hypothetical protein"
                     /label=hypothetical protein
                     /db_xref="SEED:fig|6666666.357427.peg.5"
                     /translation="MYFLFYHVVLFSKFLNDSDCVSDAELTSITVFIFPTWFFRETDRF
                     HCLKNAKI"
     CDS             5221..5877
                     /codon_start=1
                     /product="BarA-associated response regulator UvrY (= GacA =
                     SirA)"
                     /label=BarA-associated response regulator UvrY
                     /db_xref="SEED:fig|6666666.357427.peg.6"
                     /translation="MISVFLVDDHELVRAGIRRILDDIKGLKVVGEAQCGEDAVRWCRN
                     NSADVVLMDMNMPGIGGLEATRKIVRFSPEIKVIMLTIYTENPLPAKVMQAGAAGYLSK
                     GATPEEVICAIRSVHAGKRYIASDIAQQMALSQLEPQTETPLECLSERELQIMMMITKG
                     QKVTEISDQLNLSPKTVNSYRYRMFSKLNINGDVELTHLAIRHGLFSAETLISSD"
     CDS             5870..7702
                     /codon_start=1
                     /product="Excinuclease ABC subunit C"
                     /label=Excinuclease ABC subunit C
                     /db_xref="SEED:fig|6666666.357427.peg.7"
                     /db_xref="GO:0003677"
                     /db_xref="GO:0004518"
                     /db_xref="GO:0005622"
                     /db_xref="GO:0006281"
                     /db_xref="GO:0006289"
                     /translation="MTERFDAQAFLKTVTSQPGVYRMYDAGDTVIYVGKAKDLKKRLSS
                     YFRAHVASRKTEALVKSIRQIDVTITHTETEALLLEHNYIKRYQPRYNVLLRDDKSYPM
                     IFLSGDTHPRLSVHRGAKHAKGEYFGPFPNGNAVRETLMLLQKLFPIRQCENSVYRNRS
                     RPCLQYQIGRCLGPCVSGLVSEEEYQRQVEYVRLFLSGKDQQVLTRLIDRMETASRELR
                     FEEAARIRDQIQAVRRVTEKQFVSGDGDDLDVIGVAFEAGMACVHVLFIRQGKVLGSRS
                     YFPKVPGGTELAEVVQTFVGQFYLQGSVSRTLPSDILLDFSLPEHQLLAESLTEQAGRK
                     IQIQTRPRGDRARYLKLARTNAHTALTTKLSQQSTVQQRLAALASVLGIEKINRMECFD
                     ISHTMGEQTVASCVVFNADGPLRSEYRRYNISGITPGDDYAAMNQVLRRRYGKSIDEGK
                     IPDVIVIDGGKGQLAQAKDVFASLQVPWDKSRPLLLGVAKGSDRKAGLETLFFEATGEG
                     VALPADSPALHVIQHIRDDSHNHAISGHRKQRAKVKSTSSLETIEGVGPKRRQMLLKYM
                     GGLQPLMNASVEDIANVPGISHALAEKIFHALKH"
     CDS             7760..8308
                     /codon_start=1
                     /product="CDP-diacylglycerol--glycerol-3-phosphate 
                     3-phosphatidyltransferase (EC 2.7.8.5)"
                     /EC_number="2.7.8.5"
                     /label=CDP-diacylglycerol--glycerol-3-phosphate 3-phos
                     /db_xref="SEED:fig|6666666.357427.peg.8"
                     /db_xref="GO:0008444"
                     /translation="MRFNIPTWLTLFRVVLIPFFVLAFYLPFNWAPMVCAGIFVFAAVT
                     DWFDGFLARRWKQTTRFGAFLDPVADKVMVAVALVLVAEHYHSWWITLPAATMIAREII
                     ISALREWMAELGKRSSVAVSWIGKIKTTAQMVALVGLLWRPERMVEAAGVAALYVAAVL
                     TFWSMFQYLSAAWRDLLEH"
     CDS             8298..8417
                     /codon_start=1
                     /product="hypothetical protein"
                     /label=hypothetical protein
                     /db_xref="SEED:fig|6666666.357427.peg.9"
                     /translation="MNIDRLALKNSKRFRWDDNFIDSLRQVSRMHRIDSDTVY"
     tRNA            8450..8522
                     /product="tRNA-Gly-GCC"
                     /note="/transl_table=11"
                     /db_xref="SEED:fig|6666666.357427.rna.3"
     tRNA            8554..8624
                     /product="tRNA-Cys-GCA"
                     /note="/transl_table=11"
                     /db_xref="SEED:fig|6666666.357427.rna.4"
     tRNA            8636..8719
                     /product="tRNA-Leu-TAA"
                     /note="/transl_table=11"
                     /db_xref="SEED:fig|6666666.357427.rna.5"
     CDS             complement(8855..9892)
                     /codon_start=1
                     /product="Mobile element protein"
                     /label=Mobile element protein
                     /db_xref="SEED:fig|6666666.357427.peg.10"
                     /translation="MQCNMPRKRKDPRDNALPPRVYRGKSKYEFHPVGGGSISLCPLDS
                     PIPLIWEKYQEASNYHEEKFTLDRLTQRFMHSPDFLDLAIETQKDYRKYSTKISPVFGS
                     MSPDSIKPEHIRKYMDNRGVKSKTQANREKAFMSRVYRWGYERGLCKGNPCKGVKQFKE
                     VARDRYVTDDEYNALYSVAPPVVQIAMEIAYLCLARQGDVLALTEKQILDEGIFIAQGK
                     TGAKQIKAWTDRLRTAVINARNLPLKDGISSMYVIHQATGGRYTRDGFNSRWQQAKEAA
                     VLAFPHLSFDFTFHDLKAKGVSDLDGTLAEKQAISGHMTIGQTARYDRKIPIVPVVGGQ
                     NKKSK"
     CDS             complement(9882..10106)
                     /codon_start=1
                     /product="hypothetical protein"
                     /label=hypothetical protein
                     /db_xref="SEED:fig|6666666.357427.peg.11"
                     /translation="MNTENALLSDEELIELTGYKYPSKQCAALSRSGISFIKRRNGRPG
                     VTWAAINANLSASAKQVEREEEQPNFDAM"
     CDS             complement(10513..11013)
                     /codon_start=1
                     /product="Phage protein"
                     /label=Phage protein
                     /db_xref="SEED:fig|6666666.357427.peg.12"
                     /translation="MSTTAIAIAADMAKLQHLLETSDELTPEMIADTMAGLEIELSEKM
                     DAIMIHVRNLQGQAKTCDEEAKRLTDRKRSFENREKQLKKYALDCLLAAGLSSLKTPRN
                     TFTARKGVASVIIDNESLLPDELVTVQTLVAPDKKAIKEAIDAGVDVPGAHIEIGQQSL
                     QVR"
     CDS             complement(11010..13178)
                     /codon_start=1
                     /product="Phage protein"
                     /label=Phage protein
                     /db_xref="SEED:fig|6666666.357427.peg.13"
                     /translation="MDMYIASLEPKKSALKNGAKAMATLVEAKNQKLAAMKATMLLEEL
                     HPGASDNFFNPTITEDRVGSPRPGIGFFSTDFMDENELIDGVWTRKPDPAPAPTRPTEL
                     SLQEKIAALVLLGKVDLDDHDYSLVLDFFADDESGDDDTHTIVNVLSQYPAVAAMYPVR
                     VTELVAAIEKKFNPPIDAAAASSFVNSWIYGTAERPTHSAPPATAPVVERVWTNMDRLD
                     IGIASCIVTDADTFDGVSASDVARAKELAKSDDQMFQRWSVAIRLQNGALSIPGDVLLG
                     LLREAKKRPELLNDANARQRLADKYLAVWREGAVAHDNQHDGDDAQQAGAAIATRQLDQ
                     QPDIQNLGGGRLSIDGLIGPESSSSNQGEKTEASEPEPEPAASVAQQARQALDEMGYGI
                     YAGDADTIAQSVPSEVTVTPDAGASIASATPAETTDASARMERYLSAMKDDQAKANLAI
                     WNRVQRTDPAFVKKNDYGAGLSSIKAQYILMRATEVFGLEGIGWGVEIKEERIDKGVPL
                     LEPIQDQSGKVVGQRPVRDGDGSLFCLSVHTIRIDLWYIWNGQRGSIPSYGHTDYITSG
                     KDGRLSMEKEAAKKSLTDATVKALSHLGFAADVYMDMHSDGAYTAELDVEFGIKRASEK
                     AVDVTRLREELDEKLGRAAETIKAAVSGNEAAKVYGVLAREVEVHRKNAEAKGDSEHAR
                     YLAGRLRRLNDLKDTRIAELKAKEEEKS"
     CDS             complement(13183..14697)
                     /codon_start=1
                     /product="hypothetical protein"
                     /label=hypothetical protein
                     /db_xref="SEED:fig|6666666.357427.peg.14"
                     /translation="MNITKEQVKAWDACRGGYAWFLEKFPQGGVYAAVHQALIDDNRFV
                     DAQWLVDKMYSSYWNDPSFPKAETAATDKLTGSLNSMEFPSADVDGDSDGDSSGVRARI
                     GSSGVRAQIGSSGDEAQIGSSGDEAQIGSSGDWARIGSSGDWARIGSSGDWARIGSSGV
                     RARIGSSGDEAQIGSSGDEAQIGSSGDEAQIGSSGDWAQIGSSGDEAQIGSSGDEAQIG
                     SSGVRARIGSSGVRARIGSSGVRARIGSSGDEAQIGSSGDEAQIGSSGDEAQIGSSGDW
                     ARIGSSGVRARIGSSGDEAQIGSSGDEAQIGSSGDEAQIGSSGDWAQIGSSGDEAQIGS
                     SGDEAQIGSSGVRARIGSSGVRARIGSSGVRARIGSSGDEAQIGSSGDEAQIGSSGDEA
                     QIGSSGDWARIGSSGVRARIGSSGDEAQIGSSGDEAQIEASGTNSVVAAAGSIGYILLG
                     EGGCAAVPYSDGERTRFAIAYVGENGIKAGVKYTLNDAGDFVAMEE"
     CDS             complement(14723..15025)
                     /codon_start=1
                     /product="hypothetical protein"
                     /label=hypothetical protein
                     /db_xref="SEED:fig|6666666.357427.peg.15"
                     /translation="MKAPDITVKLYIHHNQFNPVPFVATCDMSQWGGLTLIDVREITIP
                     APQLSAGEITQKRVEQLRRQQSSIIDSAHVQASAIEDQIKNLQCIEHSPAAMTSR"
     CDS             complement(16009..16134)
                     /codon_start=1
                     /product="hypothetical protein"
                     /label=hypothetical protein
                     /db_xref="SEED:fig|6666666.357427.peg.16"
                     /translation="MRLFSALPESEKEKHLADLRERVDGFNRLFEELLRARKESK"
     CDS             16480..16689
                     /codon_start=1
                     /product="Putative regulator of cell division encoded by 
                     prophage CP-933O"
                     /label=Putative regulator of cell division encoded by
                     /db_xref="SEED:fig|6666666.357427.peg.17"
                     /translation="MFKTDAIKYFGNLTKLAEAAGVKLPSASAWGDLIPERRAARLDRV
                     TNGALRYDPALYQRHNDTSVNPKI"
     CDS             16723..17169
                     /codon_start=1
                     /product="Phage or Prophage Related"
                     /label=Phage or Prophage Related
                     /db_xref="SEED:fig|6666666.357427.peg.18"
                     /translation="MDVRDLKNEIEDWAAEAGQERVAIEISRALAELGGHPGIKLHDIE
                     CGDVWRAINNNRQQIFRWLRSDTRAADRKIQALAPAIKRALPAERRARLESSAMYLVAI
                     AIREFFEAVIAILLGDCDMSQRLATANAAIAAVAPVLQQRLTTV"
     CDS             17185..17397
                     /codon_start=1
                     /product="hypothetical protein"
                     /label=hypothetical protein
                     /db_xref="SEED:fig|6666666.357427.peg.19"
                     /translation="MTTITYCNGYRLNGNPAHIADIVPIFEARREAARSVWEQYEQRKA
                     ELLTEGLTPEQYQDACRVIAEALGV"
     CDS             17399..18304
                     /codon_start=1
                     /product="Replication protein O"
                     /label=Replication protein O
                     /db_xref="SEED:fig|6666666.357427.peg.20"
                     /translation="MSSKILGYVWDACAASGIGGTKLLIMARLADFSNDEGMSYPGMKT
                     IARQLRAGESTVRTAISELEADGWLVRENRRKGNRNTSNVYALNVDRLESIAFAERQKV
                     RELRNRNSHPSESDTSIPDTSESDSSYASHPSGSDKKPGFHPSESGGHDPSVITDPSVI
                     TDPSDICATSKKTAKGNYLEQFELCWSAYPKREGSNPKNHAFKHWQARIKDGVNADELL
                     AGTQRYAAFCAAKGQIGTPYVMQAQRFYGTSREFENGWEVAAAPVPAQRPQKPSDTTQD
                     MLARQYGNAGINWKIRGESR"
     CDS             18301..18909
                     /codon_start=1
                     /product="DNA replication protein DnaC"
                     /label=DNA replication protein DnaC
                     /db_xref="SEED:fig|6666666.357427.peg.21"
                     /translation="MTATNTDVSEFLAADCGVGRRFIRSTLQNFTRVNGQADSNLAVCC
                     RFVDEWEQIYENGSSLVMTGRPGTGKTHLAVAVMRALIERHDVDTYMTTAQRIIRAMRD
                     SWRQGSDRTEYDVLSFYCEKDLLVIDEIGMQHGTDSERLLVSEVINTRYERMLPNILIS
                     NHTRAEMDGFLGYRAMDRVMESSAVLIFDWDSYRTASHD"
     CDS             18902..20314
                     /codon_start=1
                     /product="DNA helicase (EC 3.6.1.-), phage-associated"
                     /label=DNA helicase
                     /db_xref="SEED:fig|6666666.357427.peg.22"
                     /translation="MTDFLPPHDLNAEQAVLGGLMLNDDEERRAAVMSMLKPESFYSIA
                     HQRIYRGLLALAKTDRPTDAVTLSAELKTSNDAELVGGFGYLMEICRVPAAANTLAYAR
                     IVRDKAIARYTQRQLIACTEIIMAGDGQPVDEKLASIQQIMGQTFEHAGGGKRGGLRPF
                     ADVLTEWMDDVDRRYTDPNAGGLTLGVSGLDEIMAPKYTLRGALIVAGARPKMGKTAFY
                     NRVIGHFALNHRLPTLAFSLEVTARGIVERLVSQEAGVKSEIFYTGATDEMDMARAMAK
                     AQELAETNLMLDDTPSVSLAHIVSECRRIKRQRGSVGLVAVDYLTLMRGEQAERRDISY
                     GEITKGLKALAKELDCVVLLLTQLNRALEQRADKRPLPSDSRDTGQIEQDCDVWIGLYR
                     DSVYNENADPQLTELILRMNREGPSGTAYTLLRDGYFVDTTPEDIAQRKSQSAAPQHRE
                     RRYSKKEPIQPF"
     CDS             20363..20845
                     /codon_start=1
                     /product="hypothetical protein"
                     /label=hypothetical protein
                     /db_xref="SEED:fig|6666666.357427.peg.23"
                     /translation="MTTNKTEVVFAKRAGMIDDGCDHTAVILWQMNWRARAVSRSVYVP
                     RPRPIPVVKPRELAPKSQPRRKTESTQYRYANTLPLESLIAVMSGRWLSCDAMLKIITT
                     QHPEHTISRRALAVRISSMMKSPSVDIESRDVGITEYRLSNVDPVYLQRSKTAGGK"
     CDS             20917..21078
                     /codon_start=1
                     /product="hypothetical protein"
                     /label=hypothetical protein
                     /db_xref="SEED:fig|6666666.357427.peg.24"
                     /translation="MEWLDLRANQLIHALIDGKTDRHQVEAEIGRVAERHRDHFKRRLN
                     HWREHLKK"
     CDS             21089..21907
                     /codon_start=1
                     /product="hypothetical protein"
                     /label=hypothetical protein
                     /db_xref="SEED:fig|6666666.357427.peg.25"
                     /translation="MTELTKEALSSAIRAAAIKAESTDERRVLNYAAGEIERQGSEIER
                     LKFDMRELTEAMNRVRRAAKDLGEENHVLRNPASTEKIISQLEDLKYTRAEPSGWTCST
                     LPHGRVTDDVAEPWNAAIDADVELLKQAAPQMLAQKGPDGALVGPLKDSERAAYEAFIE
                     NYLGDSIDTRRAKNGDPDNPDYMDFAMGVGWIAWQGRADLSGNSPVIPDGWALVPLEII
                     DKFPEINVVNYNHDDVCALNSWGCELVLAAAPQPDHFPDATKMVTTGRVL"
     CDS             21904..22314
                     /codon_start=1
                     /product="hypothetical protein"
                     /label=hypothetical protein
                     /db_xref="SEED:fig|6666666.357427.peg.26"
                     /translation="MKALSIRQPWAWLIVNGYKDIENRSWHTKYRGQVLIHAAATMPTP
                     AEWREAMRVAQFAGAPAIPSFEMMDKGGIVGYATLTGTCESSPSPWFFGPVGFQLADAR
                     PIPLYPFRGRLNIFDTRLAIDGDRLVREVDHA"
     CDS             22307..22861
                     /codon_start=1
                     /product="Methyltransferase (EC 2.1.1.-)"
                     /label=Methyltransferase
                     /db_xref="SEED:fig|6666666.357427.peg.27"
                     /translation="MPDVHQILDMCCGSKMFWFDKADPRAVFSDIRSEQHTLCDGRHLI
                     ISPDVIADFRFLPFFAESFSVVVFDPPHLERVGPNGWQGKKYGKLDRDTWRDDLRAGFA
                     EGFRVLRQGGGYSFSNGTKPRSPSARCCRSRTKNRSSGSAQAKTTKPTGLYLLKGYQHE
                     YLAHRGFTVRIISDPRTSNEQ"
     CDS             22887..24827
                     /codon_start=1
                     /product="C-5 cytosine-specific DNA methylase family 
                     protein"
                     /label=C-5 cytosine-specific DNA methylase family protein
                     /db_xref="SEED:fig|6666666.357427.peg.28"
                     /translation="MNAMFLRRENPADIQRTAHMLARRQQIEVARPDAENGLVVVGFAG
                     GGGSCEGIKQALGFEPHIAMNHNPVAMAMHAMNHPRTLHYPEDIFSVDPVVSTGGLPVL
                     LGWFSPDCRHFSKAKGGTPVKKEIRGLAWVVLRWALAVRPRVLMMENVEEFRGWGPLVA
                     DGNGHLYPDTMRAGETFQGFIGMLSTGVPHDHPAIDEACEFLKITRDGDEAQRLIAGLG
                     YNVDHKELRACDYGTPTIRKRLFVVARRDGKPVSWPEPTHGDPKSPAVQAGTLAPWRTA
                     AECIDWSIPCPSIFERSRPLAENTLRRIARGIQRFVLDNPAPFIVGAGGPVYQGKPRSV
                     DQPMNTILKESRSALITPYIARIGQTGFGGDRMAYDAHDPLTTVTSKAEHLLVAPVIAR
                     QFGNSVGHGADEPNGTITAGGGGKSQLVSAFLAKHYGGNYTGPGVAVDEPAHTVTTVDH
                     HAVVAANLITIGYGEHPGRQPRVQDIEKPLGTVVAAKKHAVVTSHLIKLRGTCKDGQTV
                     TEPMPTVTAGGNHVGEVRAFLIKYYGNEKEGVDINDPMHTVVSRDRFGLVTVEGVDYQI
                     VDIGMRMLQPHELYAAQGFPPDYIIDRDEDGGVISKADQVARCGNAVCPPVACALVRAN
                     LPEYRTGEMAA"
     CDS             24824..25171
                     /codon_start=1
                     /product="Phage protein"
                     /label=Phage protein
                     /db_xref="SEED:fig|6666666.357427.peg.29"
                     /translation="MTDTRERAAARKRAERERKRAAGIQKIELNLDADELEMLQRNCAA
                     RRPGREPYDMDEYIQMLIRQDDARVKLRIKSISKQQCGKCGDVLPVDSCCMRGDSACWL
                     TLGWHDMKLRG"
     CDS             complement(25223..25402)
                     /codon_start=1
                     /product="hypothetical protein"
                     /label=hypothetical protein
                     /db_xref="SEED:fig|6666666.357427.peg.30"
                     /translation="MSDTKPPLTTHIIYTVYKNSITWNTCIELNDFYHILIITNVIIQN
                     CIKSFIFFINSVDN"
     CDS             25368..25583
                     /codon_start=1
                     /product="hypothetical protein"
                     /label=hypothetical protein
                     /db_xref="SEED:fig|6666666.357427.peg.31"
                     /translation="MWVVSGGLVSDIESVADGLPDGRALITIEQGQIVSVRIVGDNEHV
                     ASLAALLDIAKLAGYEIVNSGNKPYN"
     CDS             25640..26233
                     /codon_start=1
                     /product="Phage protein"
                     /label=Phage protein
                     /db_xref="SEED:fig|6666666.357427.peg.32"
                     /translation="MAQLSLVKSPGGILVPSTPDTREYLNRLAVGAVICCEFKKARNPA
                     FHRKYFSLLGLGFDYWEPAGGAISQSERDFVRGFVRYLASYAGAEDAISAVADEYCETT
                     GRQRAVNISATKSFDAFRRWVTVEAGHYDAYIMPDGSVQREARSVSFAKMDDLEFNDLY
                     RATLDVLWNFILRRSFPTQQSAENAAAQLLEYAA"
     CDS             26230..27306
                     /codon_start=1
                     /product="Phage NinC"
                     /label=Phage NinC
                     /db_xref="SEED:fig|6666666.357427.peg.33"
                     /translation="MRKINDVVNNGLINVVSCSGGRTSAYLVNKMEVHSFWNNKQSRNV
                     FMDTGLEHPGTYKFIRNIINEWDIPIDLIRVVYDERHGKPSTYRLIEQGELRPDFEGWV
                     GMLKKYGTPYFGGARCTDRMKQAPFLHYCKDNFGRKKYNTWLGIRFDEPARLWGDKNHK
                     ALKEIGYCNEDMSSLFIDAISHVRESELDGYSYLKAGRGINENLAGNLLGHLKNKVEDN
                     LYYLAEISDYTKSDIIKWWGAQSFDLEIDEHLGNCVFCIKKSLPKIALAAMDEPQLAKD
                     YWAALTSNEVKIEESRIGRHLQMYRKKNTFLGVIGMFSMYGRDELAGRLRSLRSYESGS
                     CSESCEPFLCSIDEDDAA"
     CDS             27303..27587
                     /codon_start=1
                     /product="hypothetical protein"
                     /label=hypothetical protein
                     /db_xref="SEED:fig|6666666.357427.peg.34"
                     /translation="MKTIYRSKKWLAAVGSIQQCVLCGAWGTQVAHRNEGKGIGVKTDD
                     CATAAICVQCHTEIDNGKNLTREERRQIMDRAIVLTVIQIARLGLVVPK"
     CDS             27623..27925
                     /codon_start=1
                     /product="hypothetical protein"
                     /label=hypothetical protein
                     /db_xref="SEED:fig|6666666.357427.peg.35"
                     /translation="MTQRDKWQKRPPVLRYRAFCDEVRLNKITLPESGWHVTFVIPMPA
                     SWSKKKRAEFNGKPHKDNLEKALLDAIFDDDSRIWDGRVSKIWGETGQIIICEAA"
     CDS             28059..28754
                     /codon_start=1
                     /product="Phage anti-termination"
                     /label=Phage anti-termination
                     /db_xref="SEED:fig|6666666.357427.peg.36"
                     /translation="MNNQFLQYVREEIMLATADFSGRTKGQLVALVEQLQYTNDRYPRK
                     RQFVIDPETEKKVMLKNPPIPGKQSHAKGHAIPLLIPVEYATASWRRAIGVIDEHHNAW
                     LRWNYAGDTDFQLQTIIVRFGWGEFSEGIKGRRIAKKTRERLRALIWLAAQDVKFQLAG
                     RNGDVYQHADLAALAGVSKSTWSETYQPHWLSMTRIFTELDRAALISVSKTRSQQKSTN
                     CKSCVAKPN"
     CDS             28988..29365
                     /codon_start=1
                     /product="Phage holin; Phage membrane protein STY1040"
                     /label=Phage holin
                     /db_xref="SEED:fig|6666666.357427.peg.37"
                     /translation="MSDPATGSAVTVALTGATIFGIATQTDYGVVFGAFAGAVYYVATA
                     ADVPLLRRGCYFLTSFITGVLGADFAGDRITALTGYEKQALAPLAAVLVSAMAIKTLAW
                     LNSQSISSWLSRFRGGGAGNG"
     CDS             29358..29633
                     /codon_start=1
                     /product="putative prophage membrane protein"
                     /label=putative prophage membrane protein
                     /db_xref="SEED:fig|6666666.357427.peg.38"
                     /translation="MVNEPITVINVAVSAVIALRLMFFRKAGAQHCAWASWLAYGLVLA
                     YGFIPISWVFGQYRDTTPITLIANIVIAALVLRARGNAAKLLSRHL"
     CDS             29630..30241
                     /codon_start=1
                     /product="Phage endolysin"
                     /label=Phage endolysin
                     /db_xref="SEED:fig|6666666.357427.peg.39"
                     /translation="MNQNQFQAAAGISAGLATRWFPHITAALKEFGITAPADVAMFIAQ
                     VGHESGGFAQTAENLNYTPAALVGTFGNRVTKYQADMLGRTAGRPAQQEAIANLVYGGR
                     LGNKAAGDGWKFRGRGLIQVTGLDNYRACGAGLKLDLVSSPELLEQDMNAMRSAGWYWM
                     SRGCSRYPDDVERVTLLVNGGRNGLDDRRARYARAVRALS"
     CDS             30238..30789
                     /codon_start=1
                     /product="hypothetical protein"
                     /label=hypothetical protein
                     /db_xref="SEED:fig|6666666.357427.peg.40"
                     /translation="MIAFNWKTMIAGLAVAALIIAARLAAYYHGQYEQQVQRADTLQSE
                     VNSQQAVISQQSLQFQRFNQIAAQASQQAVTITAKSQERQIVYRTIIKTDPAGGRCVPD
                     DVANRLLGYAYSLRASAVHTAAGNTDTTGSGPTTADCRLTYGQAVYWIDPLLSAIEQAN
                     GQLAAIREADQARGSGNTQR"
     CDS             30825..31049
                     /codon_start=1
                     /product="hypothetical protein"
                     /label=hypothetical protein
                     /db_xref="SEED:fig|6666666.357427.peg.41"
                     /translation="MAEELSASQQIRVGLLTTLSYDTAATAKAIEFVQDDQLRYKLFID
                     QYNRVHTETEVVAKTIKAIQEATEALTLF"
     CDS             31219..31854
                     /codon_start=1
                     /product="hypothetical protein"
                     /label=hypothetical protein
                     /db_xref="SEED:fig|6666666.357427.peg.42"
                     /translation="MSDSATKRPHAPQSFITPADLYPYTRLTPANDIHDWISDNIITDA
                     GYLHNPDHGHLAEADIAFLWASNAFEKKGRVVLGQCEEVMMRAGGWQKARMEQQMYEWF
                     GRVPQFIITLAADYCAECNDLEFCALLEHELYHITQAVDQFGAPKFNKEGRPALKLRGH
                     DVEEFVGVVRRYGASREVQELVDAANKPAEVAHLDVARACGTCLLKLA"
     CDS             31886..32374
                     /codon_start=1
                     /product="Phage protein"
                     /label=Phage protein
                     /db_xref="SEED:fig|6666666.357427.peg.43"
                     /translation="MAALKSEVKAFIIQMLACFDTPSQVVEAVQKEFGIKITRQQAESH
                     DPTKASGKMLAKKWVGMFNATRDRFLNEISDIPIANKAYRLRVLQRMSTTAENMKNMGM
                     TAQLLEQAAKEVGDVYTNKQKVEQSVVATHNVMPVPSCDNVDDWEKAAQKQQGEVLGG"
     CDS             32371..33939
                     /codon_start=1
                     /product="Phage terminase, large subunit"
                     /label=Phage terminase, large subunit
                     /db_xref="SEED:fig|6666666.357427.peg.44"
                     /translation="MNYKAVWKPLPGSQSLSLSCPCNEILYEGTRGPGKTAAQLARFRR
                     LVGLGYGSFWRGVIFDTEYKNLTDIITQSKRMYRLFNDGARYLASASELRWVWPTGEEL
                     LFRFGKEESDYWDYHGQEFPFIGFNELTKQQSAEFYEMMFSCRRSSFRPENYPLANGSL
                     LKPIPLETFSTTNPFGIGHTWVKKRFIEPAPRGTIIRETQKVFNPQTEREEDVTLTRVA
                     IHGSFKENPYLDPQYIATLMAIKDPNRRAAWVEGSWDVTSGGRFDHLWDARIHVITPFK
                     IPESWHVDRSHDWGESKPFSCLWWAMADGTEATLEGGRKWCPPAGTLILIAEWYGCPPD
                     ELNKGVNMSSTNVAKGVRWIDQRLAGEEAPQPEETRKDGHTIGQMSLIPYSVTRVEPGP
                     ADNAITNTGDDELSIADKMENQGVRWVESNKKPGSRINGAALFCDMLEAVVEAKGSESG
                     MPENPGFYVFENCRGWIARIPVLVRDDKNPDDVDTEQEDHDWDATRYRVLHSPQKITGM
                     LVRSR"
     CDS             33951..35402
                     /codon_start=1
                     /product="Phage portal protein"
                     /label=Phage portal protein
                     /db_xref="SEED:fig|6666666.357427.peg.45"
                     /translation="MTESEMKQQRASNASVEKERRNYLSSLFNGTSNTKRQRLYQEFGY
                     PLHLSFDDFYRAYTRNAIADASVSRMVDGCWEDFPEVYEGDKTKDATTLTAWDKQANKL
                     LKRCWKQIKGADRRNLVGRYSALLIQIKDNKPWRDPVDTSVVGRLAEKALVKLIPVWEA
                     QLEPIEWDSNPESETFGDVKMYSFVELSVGNSQDARPGRIVNVHPDRVIILAEGSDDGS
                     MTSGRSMLEAGFNKLQDIEKVSGGASEGFLKNASRQLNYNFSEKTNFAALAKALGTTEG
                     NLADALDTQVRRLNDSTDSASFMQAGTAEVLSVQAADPEPTWRTALNEWCATVPIPVKV
                     LVGMQTGERASTEDAKDWAKTRMSRRNGFLTDVITEIVTRFWTFGIIPPAKGEEITVGW
                     SDLLAPSQAEKIANMDKLADVAVKSTNAFGRSAIEENEIRAAGELQPLPELEDEVPPDG
                     NKPKPDPLDDPQSEAEKSGDTTVES"
     CDS             35410..36330
                     /codon_start=1
                     /product="Phage protein"
                     /label=Phage protein
                     /db_xref="SEED:fig|6666666.357427.peg.46"
                     /translation="MSRKSVSKMARDIEDRYYAIKLALKAQFDRLLIGRERLGNSQTWH
                     FLCHTNGADPALYQVNAGTFIYDMSAQQLADLLQIVQTILDDHLLEGGERNLWAMSHVA
                     SEFQRGTQQAFNNLSVQSQAYAQQTTLAQLLSSPAYQNQVASAYISTYSDWKLESDRAR
                     GDLANVISDAIGRGVNPRETAQIVSKRLDVSMSRAMNIAQTEQVGALRQAQWNETDWAA
                     DRLGLNTGLLWLSALKPTTRWWHASRHGKVYTTEEVRDFYAENGNRYNCYCSQIPVLLN
                     DDGSIFNDGLADKLAKERKQRKVSP"
     CDS             36369..36698
                     /codon_start=1
                     /product="hypothetical protein"
                     /label=hypothetical protein
                     /db_xref="SEED:fig|6666666.357427.peg.47"
                     /translation="MFLNTNLYVGIPSNQIYQNTGGTLGVITAFNSESGTNENILSFTA
                     KCTDEQDARLKAQYLIKEKNNTIWVWLGENANPIEGKLLDIKTHSDHANHVTYDKIEVI
                     FKTSF"
     CDS             36770..38161
                     /codon_start=1
                     /product="Phage coat protein"
                     /label=Phage coat protein
                     /db_xref="SEED:fig|6666666.357427.peg.48"
                     /translation="MTLSSIHVKSLAINASNISTTTIDGQEHYVIRGAVPIVDDIVMNG
                     GLYPAEEINNSYQSMEGKLMPLSHPKVDGHYVSANDPRAINKFYAGAWAKNVGKSGDQV
                     VMDVYINKAVAETKPDGKRLINRLEEMSTGTNVDPIHLSTGLLTNKETKSGESKGKKHS
                     WIARNMQFDHIAILLDEPGAGTPEEGVGMFVNADGQQSEVERASLTDAANNLKDGLWNR
                     VKCFIHHNSDASFDEIYQMLRDAIRVPSGSDVYRYVVGVWPDKFIYEEGNKLFQQKYLI
                     DDSTVTLVGDPVEVVRKPTEYEVKTNGEANPMKDKMIAALNAAGVKTEGLTDDQVWDAY
                     NQQVKKKEGGGDPAGGTQVNAEAITAAVNAAIKPLTDKIGTLEIQLQANAEKDLTDKRQ
                     AVKAKFPFMTEAAINSLVGDALNDMYAQCQTSHGLHGQFQQQNAADVDQWKDYDLNAGM
                     DQEKK"
     CDS             38161..38595
                     /codon_start=1
                     /product="hypothetical protein"
                     /label=hypothetical protein
                     /db_xref="SEED:fig|6666666.357427.peg.49"
                     /translation="MANVIYRGPVEREPETINLPVAAALNPGVAVKVVSGKLAVATDTT
                     GRWLILGNRRFIGQAITTAYAINETGVAYRVEGEQEYNVRLAAAAYTVGQELTVGAGGV
                     FKAAATGNQVVATFDEKAGRTLAAEGFADVVILSTPYAKA"
     CDS             38608..39639
                     /codon_start=1
                     /product="Phage coat protein"
                     /label=Phage coat protein
                     /db_xref="SEED:fig|6666666.357427.peg.50"
                     /translation="MLKFTLDQQKLILNARRRWDMMQRSMAAQHGFAVNDANGQFIAHD
                     ALVGNASVLPKDVWGEWDRSAITVQRDVLSVFNDLAASVSRPMALGKIVHYFMTLSDSG
                     DVNISLDGRGKAKTDQPLMDYEGTPLPIIDSELSFGWRQMLAAQTEGYSLDSDAISNHQ
                     RKVAEKLEDMVLNGDANINVGGATIYGLRNAPNRGTGTHGLDLNGATGTQWVGAISALI
                     GLLQAKNFYAPVTIYLNYKDWFYASVNDYAANYPKTILSRIMEIHGVAALVPASKVPVN
                     EMLGVVKRADVVQILNGMPMTMRPKARQNPEDDYVFSVLAAAAPQFKHDANGQAGYVQL
                     TKA"
     CDS             39677..40030
                     /codon_start=1
                     /product="hypothetical protein"
                     /label=hypothetical protein
                     /db_xref="SEED:fig|6666666.357427.peg.51"
                     /translation="MPNEKKQKWILTHDSHALKKGDTYEGTELPLWLAGKTVLVGDAEF
                     EVATPGQLAKLQADLDAANAQVVTLTESAASVQAALDEEKSRVSELTASKTQLQADLDA
                     ANKQLTELQKKVK"
     CDS             40033..40416
                     /codon_start=1
                     /product="hypothetical protein"
                     /label=hypothetical protein
                     /db_xref="SEED:fig|6666666.357427.peg.52"
                     /translation="MAAQIAADDVSALLAELGYSIPSVVLGLILAQVNAIDECLDAAGQ
                     DESTQKLIKIYAAALLAASSGARRIKSQGAPSGASRSFDYGVDGITWLRDSLARLDVHG
                     CTAELPISAGNNVGFFMVVGGCK"
     CDS             40413..40583
                     /codon_start=1
                     /product="Phage protein"
                     /label=Phage protein
                     /db_xref="SEED:fig|6666666.357427.peg.53"
                     /translation="MSWITVNERLPKPFTRVWVLTDTGRQITGYIKSDGEWFINCPRIR
                     VSGAVVLRWRE"
     CDS             40587..40937
                     /codon_start=1
                     /product="Phage protein"
                     /label=Phage protein
                     /db_xref="SEED:fig|6666666.357427.peg.54"
                     /translation="MSSAANWSYTAKATIWHKLAGIDEYGDPLGYAPPEVILCDYEGGL
                     SKRVGSLGAETVVKNTVWTEYALAAAGDYLLIGESTEADPVSAGADEVRQVIRYADTFE
                     RLADDWAILTGA"
     CDS             40913..41308
                     /codon_start=1
                     /product="Phage protein"
                     /label=Phage protein
                     /db_xref="SEED:fig|6666666.357427.peg.55"
                     /translation="MGNFDRGVIMGAKVRGIAQSKRGLERIINDIQGRKAVRAIQSAML
                     IGAAQAALYTPIDTSTLLNSQYRELTVRGTRLTGRVGYTANYAVYVHDPNVPQVFRRAT
                     AEKEFLTKGFNDTREQINEVMRKELSL"
     CDS             41305..41688
                     /codon_start=1
                     /product="Phage protein"
                     /label=Phage protein
                     /db_xref="SEED:fig|6666666.357427.peg.56"
                     /translation="MTPLMYERVRGMFGDAGLTDGFTVQLLMFDDPGDLAQAAMVFRPN
                     GGTAIRNDMGAEHYVLVDIIGAKDKRRDAASAVQRIIDYVQDNPMGDECVGYIQNMGGI
                     PPPVLTEEGRIVFRLQFACTYGE"
     CDS             41752..42495
                     /codon_start=1
                     /product="similar to (EMBL:AL117211) YPMT1.20C, Yersinia 
                     pestis CO-92 hypothetical protein from plasmid pMT1; 
                     similar to (EMBL:AF074611) Y1035, Yersinia pestis KIM5 
                     hypothetical protein from plasmid pMT1; blastn and dotplot 
                     analyses suggest that an insertion event has taken place at
                     this point as compared to Yersinia pestis pMT1"
                     /label=similar to
                     /db_xref="SEED:fig|6666666.357427.peg.57"
                     /translation="MSDCTNSNERLFGGAVVLEVADGCPDTKPAEADWKALAAGTSKGF
                     DFNPNTVTSDADDGAGFVETIITNSDFTISFEGEVRKRDRLDQFGIGKYIKYFSTELAA
                     KRQPAIWVRMDYGPVEFVGYMNITALSSDGGTNDIVTFSTEFKVGDASTIEVNEVTTVP
                     VTGVTLTPATSTGTAGGTSTFTVNVAPAGATNKNFTVASTDATKATATASGNTITVTRV
                     ATGTAQIVINTDDGNFVATHTVTVS"
     CDS             42557..43231
                     /codon_start=1
                     /product="Phage protein"
                     /label=Phage protein
                     /db_xref="SEED:fig|6666666.357427.peg.58"
                     /translation="MTPFKAIGECVISMLDQDYLFRPSFAAMTRVGEPAQIVRAFYDLH
                     NDEARQLIERAAAAYGVVPAWLVTHVSRPAFSKQAALQAVTVLQACCDMDCSALTGELV
                     PRKTGKGGVIWRPGSMPVSDVVLVAQSLLTHGIIGKARVRRLQRHESTERTTEFHAIEY
                     INAARSHFSMSRHEAENLTMTEFVMLLAAKYPDQKGFTREEYDQLADDYMRRKAARIEK
                     EK"
     CDS             43327..43659
                     /codon_start=1
                     /product="Phage protein"
                     /label=Phage protein
                     /db_xref="SEED:fig|6666666.357427.peg.59"
                     /translation="MKKIIALALGVMALAGCATKQYPQAPTVTGEESAVFDCKAVQQEI
                     ARAHSIQQEIESTGRFDGRTVLGFLGDFGVGNGMAKDEARKKAESRLIQLQAIESSKCS
                     RANKPV"
     CDS             43748..44047
                     /codon_start=1
                     /product="hypothetical protein"
                     /label=hypothetical protein
                     /db_xref="SEED:fig|6666666.357427.peg.60"
                     /translation="MKKLFAIAVITFSLFGCVSLGNNFDEARLVHVSKGQTTKQDVIAL
                     FGDPSTTSIDSDGNQILIWSYSIGNGFGGAIAKILTIKLHDGKVDSYSVTQSKI"
     CDS             44111..47734
                     /codon_start=1
                     /product="Phage tail length tape-measure protein"
                     /label=Phage tail length tape-measure protein
                     /db_xref="SEED:fig|6666666.357427.peg.61"
                     /translation="MASKAGDIYYDIELETAQLLSSQQKANSALDSLGKGFDRTTRNVE
                     STEKAILSLSRVAVALTAALSVQQVSEYANAWTTVSNKLANSVRPHEQLADVTQRVFSI
                     TQSTRSSLDATASLYARLERATRQYGTSASDLARLTTVINQGFIVSGATTQEAENAIIQ
                     LSQGLASGTLRGEEFNSVNEQGNRLMVALADSLGVGIGQLRNMAAQGKLTTDVVVKGLL
                     SQGSKIGDEFAKTLATTSQSLEVAKNNITKFFGESTSIQAGLSIFNSAVISASQNMDAM
                     SGALAAVALVMGGRFVGALTMAAAQQVKAMAASISSAKAAAQSAAAAELDAAAQLRLAQ
                     ANKDAALSDLNLAQARLNVIRETNAAGVAEVALADSKAASIRTNLAQIEAEKALETQRL
                     NAQISEQGRIATATRMAELQRASTALTSQLSATESATAQARATAIAQAEAQVSSARLAA
                     ADAAGVAAAANGQYAASQEASTVATKAASLSMGILRGALGLVGGPSGVAMIAAAAIFYF
                     YQKAQQAKLESIDFADKLDGVIAKMREMNSTQLAASIAKGQQSLIDQADAISDLQSRLS
                     ELRAEESKYAGLAKAFSSEGGYGVRLAEIRRQITIATGDLDAAENKRSQTASKVGIMQA
                     QMNGQFQQGIDLLKRNSQEAGVSAGMMSHLGQMIDVASKAKERFNATSLKVQVNPDAQK
                     QIDGLLLQAKLMSIVDKRQRAVTEAQDEARSKGGNANQIREAGEYAAKLYDLKEAESDR
                     EKSQREAESEANKAANQQQSIALKLENLREQTEMTAESTRELTREQAVLRAQQSLGNGA
                     TDEQTKLAGELAGKRWDVANAIRAEAAAQKMLPEAAENKSYQDDLKDLQIALNSKKISQ
                     QQFDTTAERLEQEHQAKLAKIRSQQVVTPAQEALGQVDPVQQLANQHAQQLALIQQFEQ
                     QGVLQHQQALALKNSYDTQYEQQRIAAAWQIFEQQNTTNKLLGSAIDSLSSSASSALTG
                     LINGTQSLQQALANIGSTILNSVISALVEMGVQQVKNVIMGQAAAAAALASTAAQATAA
                     AAAWAPAAISASIATLGSATTVGTAAYTGALAASKGLAIAGARYNGGPVSADSLYQVGE
                     HGKPEIFKASNGNQFMIPGDNGSVISNRDLQGGGGGHAFNYSPVINVNGDPDARTLAMM
                     QDAVKQGAMQGYQMVSQHLATGRGQVSKALSNGWGTKRRMG"
     CDS             47735..48205
                     /codon_start=1
                     /product="Phage protein"
                     /label=Phage protein
                     /db_xref="SEED:fig|6666666.357427.peg.62"
                     /translation="MAITTNVNYPCDYLPMPQRTGHAFNPVSPMIRTQLTSGRSRQRRL
                     YTSTPTQAGVTWIFSDIQAELFEAWYRDAIADGADWFNMDLRTPLGVESYVCRFTDIYD
                     GPTLIGFGRWQLTATLELWERPILPPGWGEFPDYIINSSIIDMAINREWPES"
     CDS             48202..48684
                     /codon_start=1
                     /product="Phage protein"
                     /label=Phage protein
                     /db_xref="SEED:fig|6666666.357427.peg.63"
                     /translation="MTVLNRLYASSGDEVIIETLQINIGDDVHYLCKGYEDVTATTEAD
                     NVVTFTACAIDIALPARNSDGTQDLQFAIGNINGVVSTAIRNALNNLSGATLTYRNYVS
                     TDLAAPASTPYTLTIKSGYWTALEVQIKAGYMNILDTSWPRHRYTLPYYPGLRYMS"
     CDS             48694..49074
                     /codon_start=1
                     /product="Phage protein"
                     /label=Phage protein
                     /db_xref="SEED:fig|6666666.357427.peg.64"
                     /translation="MFNPDKYRSVSWQKGGRAYPYLDCFGIVNEIRRDLGLPEWPDFAG
                     VTKDDDGLDREARNLMLSLERCEPCAGAGVACYSGSTVTHVGIVVEINSRLHVAECNPK
                     TNVTFLPLGRFRRRFVKLEFWR"
     CDS             49071..51806
                     /codon_start=1
                     /product="Phage tail fiber protein #Phage host specificity 
                     protein J"
                     /label=Phage tail fiber protein #Phage host specificit
                     /db_xref="SEED:fig|6666666.357427.peg.65"
                     /translation="MTIRIYPSRLPSEPLETHGHAATTLLKWLQSNVRGFRPDMNHPIS
                     IDVDGKAIQPSEWFDCHISPDSDVRIYPVPYAVGVVAWVAIALAVASVAYALFFAPSAS
                     GLNYSSVGSGDSLDLNPAKANSAKLGDPIREVFGRYRIYPDYVCQPVSRFKPDDPTVMV
                     TEMFLCLGIGTFAFDDGDIRVGATPIGSLGDGFSHTKYAPGADVLGDHRSENWWNSTEV
                     GGTSTGSGLDMAQTSPTSDDIVASSATVAGFDITFNGLSTTTDASTGVVTYDLPDSFVV
                     GAIVEIVIPATVSVTNSGAYSRITSNALSEIVPAVGMAVTLTYNGVDYDLFIASYTPQS
                     TGVTASVTLAYDSATGAAFTGIPVGDARLAISHAGSEYKINAVDGNTITVDRVIGGVID
                     GTWTGYSSRTVLDFSASGINDSNRWMGPFLACPENETTDAIEVNFSFPNGICGFGGSGD
                     KQPRSVSWEIQYRIYGSEAGWSNKTGTYTAQNINGMGYTERINLSSPGLVEVRCRRTNE
                     QGENNARDSMYWQALRSRLSGRPASYAGVTCMGVTVETGGKLAAQSDRRVNVVVTRNYE
                     DGAARTISGALLHVGNSVGLGMDTDTIAELESTLWTPGGDFFDYSTDSASSNSSGSSSV
                     SVLDMLNKITSAGKSYFLLSDGLASVGREGVKTWTGIISPQETTDHLQTAFSAPSDDDY
                     NGVDVTYINGSTWAEETVQCRTPDNPTPLKIESYTLDGVLDKDHAYRIGMRRLMKYRQQ
                     RLTFTATTELDALCYNVGDRIIFTDDIPGNETVSCLVTSMSTAGGVTTVTTSEPLNWSY
                     ENPRALIRYQDGTASGLMVATRINEYALSVPHLPTFESIVMGDSAIEPPRLIFCDSARV
                     GYDAIISDISPQTDGTCQVTASEYRATFYDYDSAAYPGNV"
     CDS             51876..53480
                     /codon_start=1
                     /product="hypothetical protein"
                     /label=hypothetical protein
                     /db_xref="SEED:fig|6666666.357427.peg.66"
                     /translation="MTTYNTGNALGSAAAKDLYDNAQNLDIFVNDPANRVAPDRLGVQR
                     KTWHGIEADHAEQMAAFDSDFETFLTQSGYQYVGDYSNGPFALTSRSQLIRHDGEYWRV
                     AANVDLPFTTTGTNATSWATDVISLVSVGDAALRSDLAAPTGAGMVGSSGGTVQADIDG
                     LISGVSAISDRVSTINDHADLVIDDYLLAGETAYDNAIQRVLTASLASGRPIKFLPRMY
                     NFNSPVTLNMDATGIKIYGAGVGRTELRFPNAAAGVTQLIIKSSADWFDLVWEGMSVRS
                     SHAGTLCQIGNTSYADPLNVARLQDLAFLNSGTGGNDVVALRLAYGVQCSLINVRANCY
                     ADGAGTNVGRALVVEQAGFTSYIACSFGNASYGVSFLNGVSFANNFIGCDFENINIALY
                     NGSVNSGGHTFIGCQFSLWTQYLAQAPVGATNRFLIINPNVSQTSGLLDPANGAGIKFQ
                     SDQLGVTTPAVPASGATVTNITGRDVVVIVWAGNVSAISRNGAAQGMTGGTVILHPMDT
                     IALTYSVAPGWTWYKLG"
     CDS             complement(53620..53748)
                     /codon_start=1
                     /product="hypothetical protein"
                     /label=hypothetical protein
                     /db_xref="SEED:fig|6666666.357427.peg.67"
                     /translation="MADKYDFDTVFKLLDEMESCVNKVRQLNQQLDECSPAIPQAA"
     CDS             complement(53764..54027)
                     /codon_start=1
                     /product="hypothetical protein"
                     /label=hypothetical protein
                     /db_xref="SEED:fig|6666666.357427.peg.68"
                     /translation="MLKKARLLPIPDLRRNNPTFAETVTQLKFFRDLSKMAADLLNIDR
                     EDDLSELDDYIHHADKLALAIDADDYDALCEAISALNDKPYI"
     CDS             complement(54680..54841)
                     /codon_start=1
                     /product="hypothetical protein"
                     /label=hypothetical protein
                     /db_xref="SEED:fig|6666666.357427.peg.69"
                     /translation="MLDGCPMLSYAVFSDFGGWLAVKIWPGIAIPLHTDPLETMEDALD
                     EVAEAVDS"
     CDS             55171..55284
                     /codon_start=1
                     /product="hypothetical protein"
                     /label=hypothetical protein
                     /db_xref="SEED:fig|6666666.357427.peg.70"
                     /translation="MPVIWQVAAKWRQGESTDFSGIKKAASGKPLLLTMVE"
     CDS             55596..55793
                     /codon_start=1
                     /product="hypothetical protein"
                     /label=hypothetical protein
                     /db_xref="SEED:fig|6666666.357427.peg.71"
                     /translation="MLKNYFYDQHDVARSDEEKREIVVSAILEIIKEGASESGVQVALD
                     AIGSRITETADIIQRALEND"
     CDS             complement(56209..56649)
                     /codon_start=1
                     /product="Phage spanin Rz #LysB"
                     /label=Phage spanin Rz #LysB
                     /db_xref="SEED:fig|6666666.357427.peg.72"
                     /translation="MKSAMIIAVIMIVLSAGVGVQSWRLHNARQLSDQQAQTLSLQQTA
                     LDEKSGQLKALSEQAERNNLEQARLRDMAAETQAALSERQKVVMRLQHENEALKRWADT
                     DLPADIIRLRQRPAFAGGRAYREWLSQTDALPVPGGQSANQR"
     CDS             complement(56646..57134)
                     /codon_start=1
                     /product="Phage lysin, 1,4-beta-N-acetylmuramidase (EC 
                     3.2.1.17) or lysozyme #Protein S in phage lambda"
                     /EC_number="3.2.1.17"
                     /label=Phage lysin, 1,4-beta-N-acetylmuramidase
                     /db_xref="SEED:fig|6666666.357427.peg.73"
                     /translation="MLNNPNLIAFLDMLAFSEGTATHPLTCNRGYDVIVTGIDGKPEIF
                     TDYRDHPFANGRPGKIFNKQGQRSTAAGRYQQLYRYWPAYKTQLALPDFGPDSQDTLAI
                     QLIREQRALDDITQGWLTSAITRCNNIWASLPGAGYGQREHNTERLVAVYQQAGGKLA"
     CDS             complement(57124..57435)
                     /codon_start=1
                     /product="Phage holin # possibly family II"
                     /label=Phage holin # possibly family II
                     /db_xref="SEED:fig|6666666.357427.peg.74"
                     /translation="MNETDKSIVSLFIIGTLIAVGKVLAGSEPITLRLFIGRVMLGGFV
                     SMMAGIALVQFPDLSPVAINGIGAALGIAGYQTIELLIQRRVRQLGKKSTPEKNNDAQ"
ORIGIN
        1 tcagactgtt ctagccgtct tatgttgttg agcataaatg tatggcgcaa catatccttc
       61 tcggttcgta tccagataat ccgaccacca ttgcatcatc gctttacgtg cgtcgagata
      121 ttctgcttta tgaatgtaag ccgctcgaac actattgcgt tcctgatggc tcatttgacg
      181 ctcaacggca tcctgcgacc atagtccaga ctccatcagg gcgctacagg ccattgcccg
      241 gaatccgtgg ccgcagattt catctttcgt gtcataaccc atcaggcgta gtgccttgtt
      301 gaccgtgttt tcgcacattg gcttatacgg attatgatca ccgggaaata ttagttcctg
      361 atgcccagag atttcccgta tctgtttcag aatagcgatg gactgacggg agaggggaac
      421 gatatgcggc gtgcgcattt tggcaccacg cccggaataa cgcacacccg ggatggcttc
      481 gcgggtggct ggaatggtcc agattttgtt tctaaaatcg atctcagacc aacgggcaaa
      541 gcgcaattcg ctggaacgga tgaacaggtg cagggtaagt gagactgcca aacgggttaa
      601 ttctctccct tgctggtagt cctcaatgct agccaacagc tctggcagtc gttccagtgg
      661 aagggcaggg tagtggcgtt taacgggagg ggcgattata ccgtccagat tggccgccgg
      721 attatgctct atcaactcct gatgcgcggc atgacgcatg atgttgcaca tatgctgccg
      781 agtgcgtgcc gccacttcca gcaaaccctt tttctcaatc cctttcaaca gatcgatgaa
      841 gtggcgagtt ttcaattctg tgatcggcag gtgtccaatg atcgggaaga tatggttatt
      901 catgctggcg agcagacggg cggcatggtt ctctgaccag gttcggttgc ttttatgcca
      961 gctcaatgcc acggtcttga aattcttagc aggagaacga gctgcttttt cagcggcacg
     1021 ttgctgagcc gggttgatat tttgcgccag cagtttgcga agttcgtcac gtttctggcg
     1081 tgcttctgac agactgatta acggataagc gcccaacgct atgcgggtct ctttgccaaa
     1141 aaaatagtat ctgaagtacc agagacgcga accagtaggt ttaacgtgaa gatacaggcc
     1201 gtgtgaatcg gatagtttta tgggggtaac aggtggtttt aagttgcgga ttttagtgtc
     1261 gttaagggac atatgcgggt cactccatta tcgaaccgga aagaccccaa atctgaccac
     1321 caaattctcc cgatgcggag ggtaaactga aaatgcatcg ggaagacttt tcacgctaac
     1381 ttattgaatc agcattacat agggattcgc aaagcggcat gaaaataaga atttggctcc
     1441 tctgactgga ctcgaaccag tgacatacgg attaacagtc cgccgttcta ccgactgaac
     1501 tacagaggaa tcgctaagtg gtgtggatga tagcgatagc ctgacagctt gtcaaagcat
     1561 gttaacgtta ggtgcgactg tttgctgaac ttataaccaa atgattgaaa ttgttgtggt
     1621 agtcggcgct tttcatctca ggtgaaccgt tgaactcgtt agcgggtgca ctttcagata
     1681 gcaacgtttg cactgttttg gtgcgtaaaa atcctggcgt caggatacgg cggacagcga
     1741 taaggggatt agtattgtta ctgtcaccgc tatcaccatt gcttttactt atttttaagc
     1801 gggttaagcc atcgccacac tttttttgat gatagtgaaa tgatctggcg cgcttcttgc
     1861 tactacttag ccgtaactat tcaggaggta cacatgaatc tgagacggct caaatacttt
     1921 gtgaaaatcg ttgatatcgg cagcctgacc caggccgctg aaatgttgca tatcgcgcaa
     1981 ccagcgctga gccagcaagt tgccacgctt gaaagcgaaa tggagaagca actgctggtc
     2041 cgtagtcgtc gtggcgtgac gccgactgaa gcgggcaaaa ttctgtattc acatgcacaa
     2101 accattttga atcagtgtga acaggctaag cacgcagtga atggtgtacg gcaaacggta
     2161 agcgtctaat cgggtacggt cagctacatc atcgggcgta gctgaccgta ttggccccgg
     2221 agctgtttta atgcgtcacg ccagggcgtt gactctgcga cggcgaataa attgataggc
     2281 gatagccaga accacaaacc acaccggcgt aaccatcagc gcctgcaagg tatccggctg
     2341 caatgtcagc agtaccatca cgaaagcaaa gaaagccaga catacccagc tcattactat
     2401 tccccatggc attttgtatg aagaagtttg gtgcaactgc ggccggttcc ggcggtacac
     2461 cagataagaa cacagaatga tactccacac gaacatgaac agaatggcgg acacggtggt
     2521 gaccagcgtg aaaaccgtca tgacgttagg aattaaatag atcagtacga cgccggaaag
     2581 caggcacagg cacgagaaaa acagccctgc cgagggtacc gcccgttttg acaaccgacc
     2641 gaaacgcgcc ggcgcatcgc cttgtctggc cagcccaaac agcatgcggc tggttgagaa
     2701 taccccgctg ttggccgacg acgcggcgga agttagcacg acaaaattaa taacgctggc
     2761 ggcggccggc aagccgacta acacaaacat ctccacaaac gggctgcggt ctgccgcaat
     2821 gtggctccac ggcgtaaccg acataatcat catcagcgca aatacataaa acataatgat
     2881 acgtatcggt atggcgttga ttgcgcgcgg cagaaccact ttcgggtttt tggtctccgc
     2941 tgccgtggtg ccgaccagct caataccgac aaaggcaaac acggctatct gaaagccggc
     3001 gaaaaagccg ctgagtcctt tcggaaacat accgccgtcc tgccagaggt tggtcacgga
     3061 tgccaccgcg ccggaaggcg atgtaaattg catgataacc agaaccgcac caatcacgat
     3121 cagcgcgacg atggccacaa tcttgatcat ggcgaaccag aactccattt cgccaaacag
     3181 tttaacggta gccagattca aggtcagcag cagcaggacg cataacaggg aactgatcca
     3241 ctgcgacaga tccggaaacc agaattgtgc ataggcgctg atggcgacga catcggcgat
     3301 gccggtcacg acccagcaaa accagtaagt ccagccggta aaaaaaccgg cccacggccc
     3361 cagcaggtcg gcggagaagt cgctaaacga tttgtaattg aggttggaga gcagtaactc
     3421 gcccatcgca cgcataacaa agaacagcat gaacccgatg atcatgtaaa cgaagataat
     3481 cgatgggccg gcaaggctga tggttttccc tgaccccatg aacaggccgg taccgatggc
     3541 gccgccgatg gcaatcaact gaatatggcg gttggttaga ttgcgccgca gatcgctatg
     3601 cccggtggcg tccgggacgt ggtgcgtttg ttctgtcatg taatgtgatt tccggattgt
     3661 gtctgccagg gtgagggcgt ttatcaggtc tcgccccgtt acccatgtga tataagaagt
     3721 tagaatggtt aatagtaaca cggtattctt ctcatgatga gttgaggcgt aattcctgcc
     3781 acttcggtac gttcttcacg cggtggcgaa tttacatccg ggaatcaatc ggaaggcgat
     3841 tggctgctcg ggagagggaa caaaatagtg ataggttaca atgtgttcgc cgattcccct
     3901 gtctgctgaa aaaataagat gaactatttg acagatggcg ttaagaagag aataatccgt
     3961 ccccgttggg tcgttagctc agttggtaga gcagttgact cttaatcaat tggtcatagg
     4021 ttcgagccct atacgaccca ccaacacttc ctttcattcg tgctaatgta tttatttctt
     4081 cagaaacatt ttctcactat ttaattcccg ggttgattac tctataggtc ttttttggtt
     4141 aaagaattct atttcagaat ggatcacaat tattaaattt ttatcttgtc atttatctgg
     4201 gaataacctg ctttgttgac gaaatataaa tcataatgtc aacattcgcg cattgttgct
     4261 tttatttttg cttatttatt gtgcggggaa aatggttcat actcatcgga caatagcggg
     4321 ttgcgctgat gtccgatgag ttttgattag cggcgataga ctgttttgat ttgcttaatg
     4381 gtagtgccga atatttccgc ctgagcaggg tcttccagtt gggcaatgta tttttccatg
     4441 ctgacgatga ccttgcctgc atcagcctga ccaatggatt tcagcatcaa cgtcatcagc
     4501 actttcaggc agctgacttc atgcgccaac gtttcgggtg tggaggctgt cggaaagtcg
     4561 ttgttgttca tagtgtctcc tgtaacaaac ggaagccggc gcggtggagc cagagactgg
     4621 ttctgtgcag ccacacacgc cggcgacata acaaaatttg gttttattat accataggtg
     4681 ccaatgcatc tggtcaggaa aataaccatt ctgccccatt aagttgtatt ctttttatct
     4741 gtttatgcca cattctgcct atattttgtt aacgtgtttt tggcttttaa atgcgtttga
     4801 ttagatacat tgcaactttt atatggatat tttggggcag gtgtattatt tgtagtaaac
     4861 agtcggtgcg gcaaagtgac aagacagtta caatgatgga aaagaacgca atcacgcacc
     4921 caattgcctg tacttacaaa acttgataat ctattgatta aatttagatt ttggcatttt
     4981 tcagacagtg aaatctgtct gtttctctaa aaaaccaggt tggaaatatg aatactgtga
     5041 tggaagtgag ttccgcgtct gatacacagt cgctatcatt caggaactta gagaataata
     5101 ccacatggta gaataaaaaa tacattttta attaaaaagt gtattcattt tttctaaacc
     5161 acgtagtacc acctgcaaca aactcgtctg taagtgttac tctttttgga gaattgttct
     5221 ttgattagcg tttttcttgt tgatgaccat gaactggtgc gagcagggat acggcgcatt
     5281 cttgacgata ttaaaggcct caaggttgtt ggtgaggcgc agtgcggtga agatgcggtc
     5341 agatggtgcc gtaataacag tgcggacgtt gtgctgatgg atatgaacat gccaggaatc
     5401 ggcggtcttg aggcaacacg caaaattgta cgattttccc ctgaaattaa agttataatg
     5461 ctaacgattt acacagagaa cccgttacct gctaaagtga tgcaggccgg ggctgcgggt
     5521 taccttagca agggcgccac gccggaagag gtgatctgcg ccatccgctc tgtgcatgcc
     5581 ggcaaacgat atattgcgtc ggatatcgct cagcaaatgg cgttgagcca actggaaccg
     5641 cagacagaaa cgccgctgga gtgcctgtct gaacgcgagt tgcagattat gatgatgatc
     5701 accaaagggc aaaaagtgac ggagatctct gatcaactca accttagccc gaaaacggtc
     5761 aacagctatc gttaccgaat gttcagtaag ctgaacatta acggcgatgt ggagctgacg
     5821 catctggcga ttcgtcacgg gttatttagt gcggagacat tgattagtag tgactgaacg
     5881 ttttgacgcc caggcttttc tgaagaccgt aaccagtcag cctggggttt atcgtatgta
     5941 cgatgccggc gacacggtta tctacgtcgg taaagccaaa gatctgaaga aacgcctttc
     6001 cagttatttt cgtgctcatg tcgccagccg taaaacagag gctttggtga aaagtatccg
     6061 gcagatcgat gtgacgatca cgcatactga aaccgaagcc ctgttgcttg agcacaacta
     6121 catcaaacgc tatcagccgc gttacaatgt gctgttgcgt gacgataagt cctacccaat
     6181 gattttcctc agcggggaca cgcatccccg cctgtcagtt caccgcggcg ccaaacacgc
     6241 caagggcgaa tatttcggcc cgtttcccaa tggcaatgcc gtgcgcgaaa ccctgatgct
     6301 gctgcaaaag ctgttcccca ttcgtcagtg tgaaaacagt gtctaccgca accgctcgcg
     6361 tccttgcctg cagtatcaga tcggccgttg cctggggccg tgcgtgagcg gtctggtcag
     6421 cgaggaagag tatcagcgcc aggtcgagta tgtgcgtctc tttctgtcgg gcaaagatca
     6481 acaggtgttg acccgcctga tcgatcgtat ggaaacggca agcagggaat tgaggtttga
     6541 ggaagccgcg cgtattcgcg atcagatcca ggcggtgcgg cgggtgaccg aaaagcagtt
     6601 tgtctccggc gacggcgatg atcttgacgt gatcggtgtt gcatttgaag ccggaatggc
     6661 gtgtgtgcac gtgctcttta ttcgtcaggg aaaagtgttg ggcagtcgca gctatttccc
     6721 caaagttcca ggagggacag agctggcgga agtggtgcag acgttcgtcg gccagttcta
     6781 tttgcaaggc agtgtttccc gcaccttgcc gtctgacatc ctgctggact tctcgctgcc
     6841 ggaacatcag ctgctggctg aatctctgac cgaacaggcc ggccgcaaaa ttcagattca
     6901 aacccggccg cgtggcgacc gcgcacgcta tcttaaactg gcgcgcacca acgcccatac
     6961 ggcattgacg acgaagttgt cgcagcagtc gacggtccaa cagcgcctgg ccgcgctggc
     7021 gtctgttctt gggatcgaaa aaatcaaccg catggagtgt ttcgatatca gccataccat
     7081 gggggaacag accgtggcgt cctgtgtcgt gttcaatgcg gatgggccgc tgcgctcgga
     7141 gtatcgccgc tacaatatct ccggtatcac gccgggggat gactatgccg ccatgaatca
     7201 ggtgctccga cgccggtatg gcaagtcgat tgacgaaggc aagattcctg atgtcatcgt
     7261 gattgacggc ggcaaagggc aactggcgca ggccaaggat gtctttgcgt ctctgcaggt
     7321 gccctgggac aaatcacgcc ctttactgct gggggttgcg aaaggcagcg atcgtaaggc
     7381 cgggctggag acgctgtttt tcgaagcgac aggcgagggg gtagcattgc ctgccgattc
     7441 gccagcgttg cacgtaattc agcatattcg tgacgattcg cataaccatg ccatcagcgg
     7501 tcaccggaaa cagcgtgcta aagtaaaaag caccagttcg ctggagacta tcgaaggggt
     7561 gggaccgaag cggcggcaga tgttattgaa atacatgggc ggactacagc cgctgatgaa
     7621 cgccagcgtg gaagacatcg ccaacgtacc gggaatttcg catgcgttgg cagaaaaaat
     7681 ctttcatgca ttgaaacact agaggcaatg tagcaacata accctattat ctttcgggcc
     7741 agacagttac ccagacgcta tgcgatttaa tataccaacg tggcttaccc tgtttcgtgt
     7801 tgtgctaatc ccattctttg tgctggcgtt ttacctgcca ttcaactggg caccaatggt
     7861 atgtgcgggc atttttgtct ttgctgcggt gacagactgg tttgacggtt ttcttgcccg
     7921 ccggtggaag caaaccactc gttttggcgc ctttctggac cctgtggccg acaaggtcat
     7981 ggtggcggtt gcgctggtac tggtggctga gcattatcat tcctggtgga ttacgctgcc
     8041 cgccgccacc atgattgccc gtgaaatcat catttccgca ttgcgcgaat ggatggcgga
     8101 gctgggtaaa cgcagcagcg tggcggtgtc ctggattggt aaaatcaaaa ccacggcaca
     8161 gatggtcgcg ctggtcggtt tgttatggcg gcccgaacgc atggtggagg cggctggcgt
     8221 ggcggcgctg tatgtggccg cggtgctaac gttttggtcg atgtttcagt atttgagcgc
     8281 cgcctggcgc gatttgcttg aacattgatc gcctcgcctt aaaaaacagc aaacgattca
     8341 ggtgggatga taattttatt gactcactgc gtcaggtaag tagaatgcac cgcatcgaca
     8401 gcgacacagt ttattgaaaa cgcttgataa acaagatgtt ctgtagaatg cgggaatagc
     8461 tcagttggta gagcacgacc ttgccaaggt cggggtcgcg agttcgagtc tcgtttcccg
     8521 ctccaaatcg atttagcagt agcatcaagg taaggcgcgt tggcagagtg gccatgcagc
     8581 ggattgcaaa tccgtccacc tcggttcgac tccgggacgc gcctccaaaa tctgagccca
     8641 gatggtggaa tcggtagaca caagggattt aaaatccctc ggcgttcgcg ctgtgcgggt
     8701 tcaagtcccg ctctgggcac catgtgctaa cgccttgata aataataaaa taattaaaag
     8761 aacatgaccg ccacgaggcg gtttttttgt gcctgcaact ccccttccta atattattcc
     8821 taatatgttt tttgcgcgct tgctaagaat gcaattattt tgacttttta ttctgaccac
     8881 ccactaccgg aacaatgggt atttttcggt catagcgtgc agtttgcccg atagtcatgt
     8941 gcccggaaat cgcttgtttt tctgccagcg tgccatccag atctgaaacc cctttcgctt
     9001 tcaggtcgtg aaacgtgaaa tcgaaactta aatgggggaa cgccagcacc gccgcttctt
     9061 tggcctgctg ccatctactg ttaaaaccgt cacgggtgta tcggccgcca gtcgcctggt
     9121 ggattacata catgctgctg atgccgtctt ttagtggcag gtttcgggcg ttaattactg
     9181 cagtccgtaa tctatccgtc catgccttga tttgctttgc gccagtctta ccctgagcaa
     9241 taaatatacc ctcgtccaaa atttgctttt ccgtcagcgc cagtacatcc ccctgccttg
     9301 ccaggcaaag gtaagcgatc tccattgcaa tttgaacaac gggcggagca acagaataaa
     9361 gcgcgttata ttcatcatca gtaacatacc tatcccgcgc gacctcttta aattgcttca
     9421 cgcccttgca cggatttcct ttgcacaacc cgcgttcata cccccacctg taaacgcgag
     9481 acatgaacgc cttttccctg ttagcttgag tcttgctttt taccccacga ttatccatgt
     9541 atttcctgat gtgctcaggc ttaattgaat ctggagacat ggaaccgaat acagggctaa
     9601 tttttgttga atactttcga taatccttct gtgtttcaat tgcgagatct aaaaagtcag
     9661 gcgaatgcat aaatcgttgc gtcaatcgat ccagagtgaa tttttcttca tgataattac
     9721 tcgcctcttg gtatttctcc catattaatg gtatgggaga gtccaatgga catagtgata
     9781 ttgagccacc acccacaggg tgaaattcat atttgctttt cccgcgatat acgcgtggcg
     9841 gcaatgcgtt atcgcgggga tccttgcgtt ttcttggcat attacattgc atcaaagttg
     9901 ggttgttctt cttctctttc gacttgtttt gcgcttgctg agagatttgc gttaatcgcc
     9961 gcccaggtga cgccaggccg cccgtttcgg cgtttgatga acgagatacc tgatcgtgat
    10021 agtgcggcgc attgcttcga tggatattta taacccgtca gctcgatcaa ttcttcgtcg
    10081 cttaataggg cgttttctgt gttcattatt tctccccaat gattttatta tttcatcggc
    10141 atcatggcag gcattatcta tatcatgctg tgtcagtgtt ttatttctga cgctacatgc
    10201 caggcggccg atcttgacgt cgaaatcaga taataggcag atgccctgtt gccatttttt
    10261 atacatagtg acctccatta agaaggtcgc tattttattt gcgatgccgt attatttttg
    10321 attatcaata atacgttttt cgacaatcgg gggactgctg cttatgcgca catcctccgg
    10381 caggtcgtaa taaacatccg ccctgtgatg ggtaacaatt cggccaaccc tgccgtctgg
    10441 cagggtgagg tatgtcggct tgtgcgggtg gtgagtccgt ttcatcattg gttttgcctc
    10501 ggtgcggggt ggtcagcgga cctgcagcga ctgctgcccg atctcaatgt gagcgccggg
    10561 gacgtcaacg ccagcatcga ttgcctcctt gatggccttt ttgtccggag caaccagcgt
    10621 ttggactgta accagctcgt caggtagcaa gctttcattg tcgatgatga cgctagcaac
    10681 ccccttgcgc gcagtgaacg tgttgcgcgg cgtcttgagc gatgacagac cggcagccag
    10741 caagcaatcc agcgcgtatt ttttcagctg cttttcccgg ttttcaaacg agcgcttgcg
    10801 gtctgtcagt cgcttggctt cttcgtcgca cgtctttgcc tggccctgaa ggttgcggac
    10861 gtgaatcatg atggcgtcca tcttttcgga aagctcaatt tcaagcccgg ccatcgtgtc
    10921 agcgatcatt tccggggtca gttcatctga tgtttccagc aggtgctgga gttttgccat
    10981 atcggcggca attgcgatag ctgtagtact catgatttct cttcctcttt ggctttcaat
    11041 tccgcaatgc gggtatcttt caggtcgttc aggcggcgca ggcggccagc aagatatcta
    11101 gcgtgttcac tgtcgccttt tgcttccgcg ttcttgcgat ggacctcaac ctcacgcgcc
    11161 aacacaccgt aaaccttggc cgcctcgttt ccgctaacgg ccgctttaat ggtttctgcg
    11221 gcgcgcccca gtttttcgtc cagctcttcg cgcaggcggg tgacatcaac cgctttttca
    11281 ctggcccgct tgatgccgaa ttcaacgtcc agttcagctg tatatgcgcc gtcgctatgc
    11341 atatccatgt aaacgtctgc ggcaaaaccg aggtgagaaa gggctttgac ggttgcatca
    11401 gtgaggcttt tctttgccgc ttccttttcc atgctcagcc ttccatcctt gccactggtg
    11461 atgtaatcag tgtgcccgta tgatggaatt gatccgcgct gaccgttcca gatgtaccag
    11521 aggtcaattc tgattgtgtg cacggacagg cagaacagcg agccgtcgcc atccctgacc
    11581 ggccgttgcc cgacaacttt cccggactgg tcctgtatcg gctccagcag cgggacgcct
    11641 ttgtctatgc gctcctcctt gatttcaaca ccccaaccaa tgccttccaa cccaaaaacc
    11701 tcggttgcac gcattaggat gtattgcgcc ttgattgaac tcagcccggc gccgtaatca
    11761 ttctttttaa caaacgcagg atcagtgcgc tgaacgcgat tccagatagc aagattcgct
    11821 ttcgcttgat catctttcat cgccgacaga tagcgttcca ttctcgctga cgcatcagtt
    11881 gtctccgccg gtgtagcact ggcgatactg gcgccagcat caggcgtaac agtgacctct
    11941 gacggcactg attgggcgat ggtgtccgca tcgcccgcat aaatcccgta gcccatttca
    12001 tcaagcgcct ggcgggcctg ctgcgcgacg ctggccgccg gctccggttc cggttcgctc
    12061 gcttccgttt tttctccctg atttgaggag ctagattcgg ggccgatcaa tccgtcgata
    12121 gagagccgcc cgccgccgag attctggata tcgggttgct gatcgagctg ccgtgtggcg
    12181 atagccgccc cggcctgttg cgcgtcgtcg ccatcatgct gattgtcatg agccaccgcg
    12241 ccctcgcgcc atacagccaa atacttgtca gccagacgct ggcgcgcgtt cgcgtcattg
    12301 agcaactcgg ggcgcttttt cgcttcgcgc agcagcccca gcagcacatc accgggaatt
    12361 gacagggcac cattttgcag ccggatcgcc accgaccagc gttgaaacat ttggtcgtca
    12421 gatttagcca gctccttcgc ccgggccaca tcagaggcgg acacgccatc aaacgtgtcg
    12481 gcatcagtta cgatgcacga cgctattcca atgtccagtc gatccatgtt cgtccacacg
    12541 cgctcgacta ctggtgcggt tgccggcggc gcgctatgag tggggcgctc ggctgttccg
    12601 tatatccagc tgttgacgaa cgaactggcc gccgccgcgt cgatcggcgg gttgaatttt
    12661 ttctcaatcg ccgccaccag ctcagttacg cgaaccgggt acattgcggc caccgctggg
    12721 tattgtgaga gcacgttaac gatagtgtgc gtgtcgtcat cgcctgattc atcgtcagca
    12781 aaaaaatcga ggacgagaga atagtcgtgg tcatccaagt ccactttacc cagcaacacc
    12841 agcgctgcga ttttctcctg caacgacaac tcagtggggc gtgtgggggc cggggccggg
    12901 tctggcttgc gtgtccacac accatcgatt agttcgtttt cgtccataaa gtcggtgcta
    12961 aaaaatccaa tgccgggacg gggtgaaccg acacgatcct ccgtaatggt cggattaaaa
    13021 aaattgtcac ttgcgcctgg gtgaagctct tcaagcaaca tcgttgcttt cattgcggcc
    13081 agcttctggt ttttcgcctc gacaagtgtc gccattgctt tggctccatt cttgagtgcc
    13141 gattttttcg gttcgagcga tgcaatatac atatccattc tgttattcct ccatcgccac
    13201 aaaatcaccc gcatcattca aggtgtattt aaccccggcc ttgatgccgt tttcgccgac
    13261 atacgcaata gcgaaccgag tccgctcacc gtcgctgtac ggaacggcgg cgcacccgcc
    13321 ttcacccagc aggatgtatc caatgcttcc cgcggcagcc acaacactat tagtaccaga
    13381 cgcttcgatt tgtgcctcgt caccgctgga gccgatttgt gcctcgtcac cgctggagcc
    13441 gattcgtgcc cggacaccgc tggagccgat tcgtgcccag tcaccgctgg agccgatttg
    13501 tgcctcgtca ccgctggagc cgatttgtgc ctcgtcaccg ctggagccga tttgtgcctc
    13561 gtcaccgctg gagccgattc gtgcccggac accgctggag ccgattcgtg cccggacacc
    13621 gctggagccg attcgtgccc ggacaccgct ggagccgatt tgtgcctcgt caccgctgga
    13681 gccgatttgt gcctcgtcac cgctggagcc gatttgtgcc cagtcaccgc tggagccgat
    13741 ttgtgcctcg tcaccgctgg agccgatttg tgcctcgtca ccgctggagc cgatttgtgc
    13801 ctcgtcaccg ctggagccga ttcgtgcccg gacaccgctg gagccgattc gtgcccagtc
    13861 accgctggag ccgatttgtg cctcgtcacc gctggagccg atttgtgcct cgtcaccgct
    13921 ggagccgatt tgtgcctcgt caccgctgga gccgattcgt gcccggacac cgctggagcc
    13981 gattcgtgcc cggacaccgc tggagccgat tcgtgcccgg acaccgctgg agccgatttg
    14041 tgcctcgtca ccgctggagc cgatttgtgc ctcgtcaccg ctggagccga tttgtgccca
    14101 gtcaccgctg gagccgattt gtgcctcgtc accgctggag ccgatttgtg cctcgtcacc
    14161 gctggagccg atttgtgcct cgtcaccgct ggagccgatt cgtgcccgga caccgctgga
    14221 gccgattcgt gcccagtcac cgctggagcc gattcgtgcc cagtcaccgc tggagccgat
    14281 tcgtgcccag tcaccgctgg agccgatttg tgcctcgtca ccgctggagc cgatttgtgc
    14341 ctcgtcaccg ctggagccga tttgtgcccg gacaccgctg gagccgattc gtgcccggac
    14401 accgctggaa tcaccatcac tatcgccatc aacatcagct gacggaaact ccatgctgtt
    14461 cagggatcca gtcagtttgt cggtggccgc ggtttccgct ttcggaaatg acgggtcgtt
    14521 ccagtacgag ctgtacatct tgtcaaccag ccactgggca tcaacaaacc gattgtcatc
    14581 aatcaatgcc tgatgcacgg cagcgtatac accgccctgc gggaacttct ccagaaacca
    14641 cgcgtaaccg ccacggcatg cgtcccatgc cttcacttgc tctttcgtta tgttcattgg
    14701 ttttgccttg tcttatatgt gattagcggc tggtcatggc cgcgggggag tgctcaatgc
    14761 attgcaggtt tttgatctgg tcctcaatcg ccgatgcctg cacgtgcgct gaatcaatga
    14821 tgctggattg ctggcggcgc agctgttcga cgcgtttttg cgtgatttca cctgcggaca
    14881 gctgcggagc ggggatcgtg atttcacgca catcaatgag tgttaaccca ccccactgtg
    14941 acatgtcaca cgtagcaaca aacgggacgg gattaaactg gttgtgatgg atgtatagct
    15001 tgacggtgat gtctggcgct ttcatagcga tccctttata ctggggctac cagtggcggc
    15061 cctcggttgt cattggtttt gcctcggcgc ggggtggttc ccgcgctgtt cccgaaaggt
    15121 ttggtcgccg atcggggtga agaagcccgc gcaagcgggc ttttttgctt cacaacacaa
    15181 cacactctgg ccttttaaaa ccgaattatc agagtgcact gtggtgtgaa aaagggcgga
    15241 tatgggaaag gaacaacccg caccgccaag gtctcacaca cagcttactg gcaaggatca
    15301 cggtcctaac gtgatttggt tgtgacgccc ggagtcgaac cgggcggcgg gtagggtttc
    15361 ccgccgatca cctgataacc acaacgataa gagcacctgc tggactcgaa ccaacaccac
    15421 ggccatcgcc tcggggcgct acttggtgga catttatgaa gaccgtcttg aagtagtaag
    15481 ccatccagtt tgaatttggt ggcccgtaac gtgggcctga cggcactttg agcctcacgg
    15541 ggcattcttt gcgcgggatg tggtgcgaaa ccgcgttcac tgccgtgaca gggagggcta
    15601 cttgtcgatc accttctcca gaacacacca cccgtaatgc taggtggggc gacccgttcc
    15661 gaactgttga ccctgccgga tgtggctggg ccttaattca tgccggttac gctatccggc
    15721 gtcgcttcac cgacccaatc aggccagaac ttacgaccga acctctggtg ttagcgcagt
    15781 ctttcccgct gtcagaactc attacccaaa ctactgcggt cattggtttt gccttggtgc
    15841 gaatcatcta cctattcgtg cgccggtagc ggctacttcg tgggcgtcct gcctgttcgc
    15901 tgtcgttgga gttaatttag ataaaacgaa cagattagtc aacgctaaat ttagatataa
    15961 cgaacaaaat gggcgagaaa aatcccaagt aattaaaatt acaagggatt attttgattc
    16021 ctttcttgcc ctgaggagtt cttcgaatag ccgattaaag ccatccactc gctcgcgcaa
    16081 atcggcaagg tgcttttcct tttcggactc tggcagcgct gaaaatagcc tcaccagctc
    16141 cgtctccctc tcatccaact ctctgggggt gggcagagcc tctcccggaa acttatcttc
    16201 atcgccgtat agaatccatg tcggcgagca ctgaagtgct tcacttaggg cgaaaaggtt
    16261 cttgccgcca gcttcgctat catcagtttc ccattgcgac acggtcacgt gggaaacctt
    16321 gattaacttt gcaagcgcgc gctgcgttag ttttaactct tttcttcgcg ctctaatgcg
    16381 ctggccgggt gtattcatag ttagttaatt ctaaattttc ttgacttagt tatctcaaac
    16441 atctagcttg tcagttaaat ctaacaggag gtgtttcgca tgtttaaaac cgatgccatt
    16501 aagtacttcg gcaacctcac caagctggcc gaggctgctg gtgtaaaact cccttcagcc
    16561 agcgcctggg gtgatttaat ccctgagcgg cgcgccgcgc gactcgaccg cgtaaccaac
    16621 ggtgcgctgc gttatgaccc tgcgctctat cagcgtcata acgataccag tgttaacccc
    16681 aaaatctgat tatcaaaaat caatgcgtag gagacgcggg aaatggatgt tagggattta
    16741 aaaaacgaga ttgaggattg ggccgcagaa gcggggcagg aacgcgtagc gatagagata
    16801 tcgcgggcgc tggcggagct gggaggtcat ccgggtatca agttgcacga tatcgagtgc
    16861 ggcgacgtct ggcgggccat caacaacaac cggcagcaga ttttcagatg gctgcgtagc
    16921 gacacgcggg cagctgacag aaaaattcag gcgctggcgc cagctattaa gcgggcatta
    16981 ccagcagagc gccgggcgcg gctggaatcc agcgcgatgt atttagtagc gatcgctatc
    17041 cgtgagtttt tcgaggccgt gatagcgata ttgcttggag actgtgacat gtcacagcga
    17101 ttggcgacag caaacgcggc gatagcggct gtggcgccag tgctacaaca acggctgacc
    17161 accgtttaaa ccgaggcaaa accaatgacc actatcacgt attgcaatgg ttaccgtcta
    17221 aacggtaacc cggcgcatat cgcagatatc gtgccaattt ttgaagcgcg tcgcgaagct
    17281 gcgcgctcgg tgtgggaaca gtacgagcag cgcaaggctg agttgctcac agagggatta
    17341 acgccggagc agtatcagga tgcatgccgg gtgattgctg aggcgttggg ggtgtgacgt
    17401 gagcagtaaa attcttggtt acgtctggga tgcgtgtgca gcatctggaa tcggtggcac
    17461 aaaattactg attatggcgc gcctggcgga tttttctaac gatgaaggca tgagttatcc
    17521 cggcatgaaa acaatagctc ggcaactacg cgctggggaa agcaccgtca ggacggcgat
    17581 cagcgagctg gaggcggacg gctggctggt gcgggagaat cgtcgcaaag ggaaccggaa
    17641 tacctctaac gtttacgctc tcaacgttga ccgcctggag tcgatcgcat ttgcggaacg
    17701 gcagaaagtt agagagctta ggaaccgcaa ttctcacccg tcagaatctg acacgtcaat
    17761 tcctgacacg tcagaatctg actcttcata cgcgtctcac ccgtcaggat ctgacaaaaa
    17821 accgggtttt cacccgtcag aatctggggg acatgatcca tcagtaataa ctgatccatc
    17881 agtaataact gatccatcag atatatgcgc tacgagcaaa aaaacagcga agggaaacta
    17941 tctggaacaa tttgaactgt gctggtcagc gtatccaaaa cgcgaggggt caaacccaaa
    18001 aaaccacgca ttcaaacact ggcaggcccg catcaaagac ggcgtgaacg ctgatgaact
    18061 gctggctggc actcagcgtt acgccgcgtt ctgcgcagca aaggggcaaa tcgggacgcc
    18121 gtatgtcatg caagcgcagc ggttttacgg taccagccgc gaattcgaaa acggctggga
    18181 ggttgcagca gcgccagtac ctgcgcagcg cccgcagaaa ccatccgaca caacgcagga
    18241 catgctggcg cgccagtacg gcaacgctgg tatcaactgg aaaatcaggg gtgaatcacg
    18301 atgacagcga ccaacaccga cgtttccgaa tttctggctg ccgattgcgg ggtggggcgc
    18361 cgattcatcc ggtcgacact gcagaatttc acaagggtta acgggcaggc ggacagtaac
    18421 ctggcggtgt gctgccggtt tgtcgacgaa tgggaacaga tttatgaaaa cggctcaagt
    18481 ttagtgatga ccggtcgccc cggcaccgga aaaacgcatc tggccgtggc tgtcatgcgt
    18541 gcactgattg aacggcatga cgtagacacg tacatgacga cagcccagcg aatcatccgc
    18601 gcaatgcgtg actcgtggcg ccagggcagc gacaggactg agtatgatgt gctcagtttt
    18661 tattgcgaaa aagacctgtt agtcattgac gaaatcggca tgcagcacgg cacggactcg
    18721 gagcgcctgt tagtttcaga ggtcatcaac acccgctatg aacgcatgct gccgaacatc
    18781 ctgatcagca atcacacccg ggccgaaatg gacggatttc tggggtaccg ggcaatggat
    18841 cgcgtgatgg aaagctccgc cgttttgatt tttgattggg acagttacag gaccgcatca
    18901 catgactgat tttttaccac cgcatgacct caatgcagag caggcagtgc tgggcggcct
    18961 gatgctgaac gatgacgaag agcgccgggc ggcagttatg tcgatgctca aaccggaatc
    19021 gttttactcg atagctcacc agcggattta tcgcgggcta ctggcgctgg caaaaaccga
    19081 caggccgacg gacgccgtca cgctgtcggc ggagctaaaa accagcaacg acgccgaatt
    19141 ggtgggcgga ttcggctacc tgatggaaat ctgccgggtg ccggcggccg cgaacacact
    19201 ggcgtacgcg cgcatcgtta gagacaaagc gatcgctcgg tacacgcagc gccagctgat
    19261 cgcttgcact gaaatcatca tggccggaga cggccagccg gttgatgaaa aattggcgtc
    19321 aatccagcaa atcatgggcc agacatttga gcacgccggc ggcggcaagc gcggcggcct
    19381 gcgcccgttc gctgatgtgc taactgaatg gatggacgat gtcgatcggc gatacacaga
    19441 cccaaacgcc gggggattga cgctgggcgt ttccggtttg gacgaaatta tggcgcccaa
    19501 atataccctg cgtggcgcac tgattgtagc cggcgcgcga cccaaaatgg gtaaaaccgc
    19561 attctacaac agggtgatcg gccactttgc gctgaatcac cggctgccga ccttggcgtt
    19621 ttcgctggag gtgaccgcgc gtggcattgt tgagcgactg gtcagccagg aggccggggt
    19681 taaatcagaa attttttata ccggcgcgac agacgagatg gatatggccc gcgcgatggc
    19741 aaaagcccag gagctggcgg aaacaaacct gatgctcgac gacaccccgt cggtatcact
    19801 ggctcacatc gtcagcgagt gccgccggat aaagcgccag cgcggctctg tcgggctggt
    19861 cgccgtcgac tatctaacgc tgatgagggg tgagcaggca gagcgtcggg atatcagcta
    19921 cggcgagatc acgaaggggc tcaaagcgct ggcgaaagaa ctggactgcg ttgtactgct
    19981 gctgacccag cttaaccgcg cgcttgaaca gcgtgcagat aaacgaccgc tgccgtcaga
    20041 cagccgcgac acggggcaaa ttgagcaaga ctgtgacgta tggatcgggc tgtatcgcga
    20101 ctcggtctat aacgagaacg cagaccccca actgaccgaa ttgatattgc ggatgaaccg
    20161 cgaggggccg tccggcacag catacacgct gctgcgagac gggtatttcg tagacacaac
    20221 gccggaggat atcgcacaga gaaaatcgca atcagcagca ccgcagcacc gcgagcggcg
    20281 gtacagcaaa aaagagccga ttcaaccctt ttaaacttaa accgcgcctg accagcgcca
    20341 acccaaaaat aaggcaaaac caatgaccac caacaaaact gaagttgttt tcgcaaagcg
    20401 agccggcatg attgatgatg gctgcgatca caccgccgtt attttgtggc aaatgaactg
    20461 gcgcgcccgc gccgtcagcc gctccgtata tgttccacgc ccccggccga tccccgtcgt
    20521 caagccgcgc gagctggccc ccaaatccca gccgcgccgc aagaccgaat ctacgcagta
    20581 tcgctatgca aacacgctgc cgctggaatc actgatcgca gtgatgtctg gccgctggct
    20641 cagctgcgac gcaatgctga aaatcatcac gacccaacac cctgagcaca cgataagccg
    20701 tcgcgcgctg gccgtgcgca tcagctcgat gatgaaaagc cccagcgttg atatcgaaag
    20761 ccgcgatgtc ggcatcaccg aataccggct cagcaacgta gaccccgttt atctgcagcg
    20821 ctcgaagacg gccggcggca aatgacgagg cagtccgatt atctacctga tgggctgcca
    20881 cacaaccgcg gatcatggcc cgctgaatgc agggaaatgg aatggctgga cctgcgggcc
    20941 aatcaactga ttcacgccct gatcgacggc aagaccgacc gtcaccaggt ggaagcggaa
    21001 ataggccgcg ttgcggagcg gcaccgggac cactttaaac gccgcctgaa ccactggcgg
    21061 gaacatctca agaaataagg caaaaccaat gaccgaatta accaaagagg cgctatccag
    21121 cgctatcagg gccgcagcaa tcaaggctga atcaactgac gaacgtagag ttcttaatta
    21181 cgccgccggt gaaattgagc ggcagggtag tgaaattgaa cgtctgaagt tcgatatgcg
    21241 agagctcacc gaggcgatga accgggttcg acgcgcagcc aaagatctgg gtgaggaaaa
    21301 tcacgtatta cgcaatccgg catcgacaga aaaaattatt tctcagttgg aagacctgaa
    21361 atacacccgg gccgaaccga gcggctggac gtgcagcaca ctgccgcatg ggcgcgttac
    21421 tgatgatgtc gctgagccgt ggaatgctgc gatcgatgcg gatgtagaac tactgaaaca
    21481 ggccgcacct caaatgctgg cgcagaaagg cccagatggt gcgcttgttg ggccgctgaa
    21541 agacagcgag cgcgccgctt atgaggcatt catcgaaaat taccttggcg acagcataga
    21601 cacgcgcagg gcaaaaaatg gcgacccgga taaccctgat tacatggatt ttgctatggg
    21661 ggtcggctgg attgcttggc aaggacgtgc tgatttgtct ggcaactctc cggtaattcc
    21721 ggatggttgg gcgctggttc ccctggagat aatcgacaaa ttcccagaaa taaatgtggt
    21781 caactataac catgacgatg tgtgcgcgtt aaattcgtgg gggtgtgaat tagttcttgc
    21841 cgccgctcct cagccagacc atttccctga cgctacgaaa atggtgacta cggggcgtgt
    21901 tctatgaaag ctctatctat cagacagccc tgggcctggc ttatcgtcaa tggctacaaa
    21961 gacatcgaga accgtagctg gcacacgaaa taccgcgggc aagtgctgat tcatgccgca
    22021 gcgacaatgc cgacccctgc tgagtggcgt gaggcgatgc gtgtcgccca gtttgctggc
    22081 gcaccagcga tcccatcatt tgaaatgatg gataaaggcg gcattgtcgg ctatgcgacg
    22141 ctcaccggca catgcgaaag cagcccgtca ccgtggtttt tcggtccagt aggatttcag
    22201 cttgccgacg cccgacccat tccgctctat ccgttccgtg ggcgcctgaa cattttcgac
    22261 accaggctgg cgattgatgg tgatcggctg gtgcgggagg tggatcatgc ctgacgtaca
    22321 tcaaatcctc gatatgtgtt gcggttcaaa aatgttctgg tttgacaaag cggacccgcg
    22381 tgcagttttt agcgacattc gcagtgaaca gcacacgctg tgcgatggcc ggcatctgat
    22441 tatcagcccg gacgtgatag cggatttccg ttttttaccg tttttcgctg agtcattctc
    22501 tgtcgttgta ttcgatccgc cgcatctgga gcgtgttggc cctaacggct ggcagggcaa
    22561 aaaatacgga aaattggacc gggacacttg gcgtgatgac ctgcgcgctg gttttgccga
    22621 aggattccgc gtgctccggc aagggggggg gtattcattt tcaaatggaa cgaaacccag
    22681 atccccgtca gccaggtgct gtcgctcacg gacgaaaaac cggtcatctg gcagcgcaca
    22741 ggcaaaaacg acaaaaccca ctggattata tttgttaaag ggatatcagc atgagtatct
    22801 ggcccaccga ggttttacag tgcgcatcat cagtgatccc cgcacatcca atgaacaatg
    22861 agcgccgcga ggcgctccta tcccacatga atgcaatgtt tttgcgtcgc gaaaaccccg
    22921 ccgacattca gcgcacggcc cacatgctgg cgcgccgtca gcagatagag gttgctcgcc
    22981 ctgatgcaga aaacgggctg gtcgtcgttg gatttgctgg cggtggcggt agttgtgagg
    23041 gaatcaaaca agcactgggt tttgagccgc acatagcgat gaatcacaac cccgtagcaa
    23101 tggcaatgca cgcaatgaac cacccgcgca cgctgcatta tcccgaggat attttcagcg
    23161 ttgacccggt cgtttcgacc ggcggtctgc ctgttttgct ggggtggttt tcccctgatt
    23221 gtcgacactt ctcaaaagcg aaaggcggga cgccggttaa aaaagaaatt cgcggtttgg
    23281 cctgggtagt tctgcgctgg gcgctggccg tgcgcccacg cgtgctgatg atggagaacg
    23341 tagaagaatt caggggatgg gggccattgg ttgctgacgg gaatgggcat ttatacccgg
    23401 acacgatgcg tgcgggagaa acgtttcagg ggtttatcgg gatgctcagc accggcgtcc
    23461 ctcacgatca cccggcgatt gatgaggcgt gcgagttttt gaaaatcacc cgtgatggcg
    23521 atgaggcaca gcgtctaatc gccgggcttg ggtataacgt agatcacaaa gagcttcgcg
    23581 catgcgatta cggcacgccg acaatcagaa aacggctttt tgtcgttgcc cggcgcgacg
    23641 gtaaaccagt ttcgtggccg gaaccaactc atggcgatcc aaaatccccg gcagtacagg
    23701 ctggaacgct ggcgccgtgg cgaaccgcgg cggagtgtat cgactggtcg ataccgtgcc
    23761 cgtcgatttt cgagcgctca cgcccgcttg cagagaacac cctgcgtcgt atcgcgcgcg
    23821 gcattcagcg gttcgtgctg gataacccgg caccgttcat cgtcggcgct ggcggcccgg
    23881 tttatcaagg gaaacctcgc agcgtagatc agccaatgaa cactattctc aaagagtcgc
    23941 gtagtgcgct gataactcca tacatcgccc gcatcgggca gacagggttt ggcggtgacc
    24001 gcatggcata cgacgcacac gatccactga cgacggtaac gagcaaagct gaacacctgc
    24061 ttgtggcccc ggttatcgcc cgccagtttg gaaacagtgt ggggcatggc gctgacgagc
    24121 cgaacggcac gatcacggcc ggcggcggtg gcaagtcgca actggtgtcc gcgttcctag
    24181 cgaaacatta cggaggcaat tacaccggcc ccggcgtcgc ggtggacgaa ccggcccata
    24241 ccgtgaccac agttgatcat catgctgttg ttgcggcgaa cctcatcacg attggttacg
    24301 gcgaacatcc aggccggcag ccgcgtgtgc aggatattga aaagcccttg ggtacggtcg
    24361 tggcggcgaa aaaacacgcg gtggtgacat cacatctgat caaattgcgc ggcacctgca
    24421 aagacggcca gaccgttact gaaccgatgc cgactgttac cgccggcgga aatcacgtag
    24481 gagaagtgcg cgcctttctc attaaatatt acggcaacga gaaagagggc gttgatatta
    24541 acgatccgat gcataccgtt gtcagtcgtg atcggttcgg tctggtcact gtagaaggcg
    24601 tcgattatca gatcgttgat atcgggatgc gtatgttgca gccgcatgag ctgtacgccg
    24661 cccagggctt cccgcccgat tacatcatag atagggacga agacggcggc gtcatatcaa
    24721 aggccgatca ggttgcccga tgcggtaatg ccgtttgtcc gccagttgcg tgcgcgttag
    24781 tgcgcgcaaa tctgccggaa taccgtaccg gggagatggc ggcatgacag atacacgtga
    24841 gcgggcagcg gcccgcaaac gcgcagagcg cgagcggaag agggcggcag gtattcagaa
    24901 aatcgagctg aatctggatg ccgatgaact tgagatgctg cagcggaatt gcgccgcccg
    24961 gcgcccaggg cgtgagccat acgacatgga cgaatacatt caaatgctga tccgtcagga
    25021 tgatgcgcgg gtgaagctac gcatcaaatc catcagcaaa cagcagtgcg gtaagtgcgg
    25081 cgatgtgctg ccggttgata gctgctgcat gcggggtgat tcggcgtgct ggctcaccct
    25141 ggggtggcat gacatgaagc tgcgcgggtg aacaacggat tagaaaaagg ggagcttaaa
    25201 cgctcccttt ttattgtaaa aattaattat caacagaatt aataaaaaat ataaatgatt
    25261 ttatgcaatt ttgtataata acattagtga ttataagaat atgatagaag tcgttaagtt
    25321 cgatgcaagt attccaagtg atactgtttt tatatacagt ataaataatg tgggttgtga
    25381 gtgggggttt agtgtctgac attgagtctg tagccgatgg gctcccagac ggcagagcgc
    25441 taataacgat agagcaggga cagatagtta gcgttagaat agttggtgat aatgagcatg
    25501 tagcaagcct ggcggcgctg ctggatatcg caaaacttgc tggatatgaa attgtaaact
    25561 ctgggaacaa gccgtataat taatgtgccg gactgaacac ccggcaaccc aaattactgc
    25621 gctatcacga ggatgaacga tggcgcagtt atcattagta aaatctccgg gcgggatatt
    25681 agttccatcc acacctgaca cccgcgaata cctgaaccgg ctggccgtcg gtgcagtgat
    25741 ttgttgcgag tttaaaaagg ctcgcaaccc cgcatttcac cgaaaatatt tctccctgct
    25801 gggtcttggt tttgactact gggagccagc cggcggcgcc atttctcaat ctgaacgcga
    25861 tttcgttcgc ggattcgtgc gttatctcgc cagctacgcc ggcgcagagg acgcaatcag
    25921 tgctgtcgct gatgagtatt gcgaaaccac cggtcgccag cgcgccgtaa atatctccgc
    25981 tacaaaatca tttgacgcat tccgacgctg ggtgactgtt gaagccggac attacgacgc
    26041 ctacatcatg cctgacggca gcgtccagcg cgaggcgcgc tctgtctcgt ttgcaaaaat
    26101 ggacgatctg gaattcaacg acctgtaccg agctacactc gacgtgctct ggaatttcat
    26161 cctgcgccga tcattcccca cccagcagtc agcagaaaac gcggccgcgc agttgctgga
    26221 gtatgcggcg tgagaaaaat aaacgatgtg gttaataacg ggctaatcaa tgttgtaagt
    26281 tgctccggcg gaagaacgtc ggcatatcta gtcaataaga tggaggtaca ctctttctgg
    26341 aacaacaagc agtcacgaaa cgtctttatg gataccggac tggaacaccc gggaacatat
    26401 aaattcatcc gaaatatcat caatgaatgg gatatcccca tagatctcat ccgcgtggtg
    26461 tatgacgaac gccacggaaa gccgtcaacg tatcgactga ttgagcaggg cgaattacgc
    26521 ccagattttg agggttgggt cggtatgctt aaaaaatacg gaacaccgta ttttggtgga
    26581 gcaagatgca cggatcggat gaagcaagcg ccatttctgc attactgcaa ggacaacttt
    26641 ggacgcaaaa aatataacac atggttggga attagatttg atgaacccgc aaggctatgg
    26701 ggagataaaa accacaaagc cctaaaagag atcggttatt gcaacgagga catgagctct
    26761 ctatttattg atgccattag tcacgtgcgc gaatcggaat tagatggcta ctcatacctc
    26821 aaggctggcc ggggcatcaa tgaaaatctg gccggtaatt tactcggaca cctaaaaaac
    26881 aaggtcgaag ataatctcta ctatctcgcc gagatatctg attacactaa gtccgacatc
    26941 ataaagtggt ggggtgcaca gtcttttgat cttgagatag atgagcacct gggaaattgc
    27001 gttttctgca tcaaaaaatc cctacccaaa atcgccctag ccgcgatgga tgaacctcaa
    27061 ttagcaaagg actattgggc cgcactgaca tccaatgaag tgaaaatcga agaaagccgc
    27121 atcggccgac acctgcaaat gtaccgcaaa aaaaacactt ttttgggggt cattggcatg
    27181 ttctccatgt atgggcgcga tgaattggca ggaaggctca gatcactacg cagctacgaa
    27241 tcgggttcgt gttccgagtc gtgcgagccg tttttatgct ccattgatga ggatgatgca
    27301 gcatgaaaac catctatcgc agcaaaaagt ggttggccgc cgtcggcagt attcagcaat
    27361 gcgtcttgtg tggtgcatgg ggaacccaag ttgctcatag aaatgaaggc aaagggattg
    27421 gcgttaagac ggacgactgc gccactgctg ccatctgcgt ccagtgccac acagagatag
    27481 acaacgggaa aaacctgacc cgtgaagagc gccgccagat catggatcgc gccatcgtct
    27541 tgaccgttat ccagattgcc cgactggggc tggtggtgcc gaagtgaaaa cctacaacat
    27601 tacgccgata ggcaagccgc gcatgaccca gcgcgataag tggcaaaagc ggccgccggt
    27661 gctccggtac cgggcgtttt gcgatgaggt ccggctgaac aaaatcacac tgccggaaag
    27721 cggctggcac gtcacgttcg tcataccgat gccagcaagc tggagcaaaa agaaacgcgc
    27781 tgaattcaac ggtaaacccc acaaagacaa cctggagaaa gctctgctgg atgcgatttt
    27841 tgatgacgat agccgcatct gggatggccg ggtttcaaaa atctggggtg aaacagggca
    27901 aatcattata tgcgaggcgg catgaaatca aataaccaca tcaccgacat cttgcgccta
    27961 cgctggtgcc gcctacgcat ttatcgctac gccgggtcgg tcgttattga ttaccggata
    28021 ttacgaaatt ttgaaaaaac actggggagg gctggcgcgt gaataatcaa tttttgcagt
    28081 atgttcgtga agaaatcatg ctggctaccg ctgattttag cggcaggaca aaaggccaac
    28141 tggtggcgct ggtagaacag ctgcagtaca cgaacgacag atacccacgc aaacgccagt
    28201 tcgtcatcga tccggaaact gaaaagaaag tcatgctgaa aaacccgccg atacccggca
    28261 agcagtcgca cgcgaaaggc cacgcaatcc cgctgttaat cccggtcgag tatgcaacag
    28321 catcgtggcg ccgcgctatc ggtgtgattg atgagcatca taatgcatgg ttgcgctgga
    28381 actatgcggg cgatactgat tttcaactcc agaccattat tgtcagattt ggctgggggg
    28441 aattcagcga aggcattaaa gggcgacgca ttgcgaagaa aacgcgtgag cggttgcggg
    28501 cactgatctg gctggcggcg caggacgtaa aatttcagtt ggcaggacgc aatggcgacg
    28561 tttatcagca cgccgattta gcggctctgg cgggcgtaag caagtcaaca tggtcagaaa
    28621 cgtatcagcc gcactggcta tctatgaccc ggatttttac tgaacttgat cgcgctgcgt
    28681 tgatatcggt ttcaaaaaca cgatcacagc aaaaatcgac aaattgcaaa tcatgtgttg
    28741 caaaaccgaa ctaaataagc catatttaag ttcactttga tatgctgcca aaactttaag
    28801 tggcggcaat gaacagaaaa gaaacccgcc actgagcggg tttcttttct ggggatctga
    28861 atcatgtgac agcaaaaagg atagacctcg gccactgcga gaagtggcaa gaatttacag
    28921 cctcggcatt cgccggggct tttttatttc cgccctctgt cacggaggac attaaacagg
    28981 agggcttatg tccgatccgg ccactggttc ggctgtcact gtggcgctaa ctggcgccac
    29041 gatttttggt atcgcaaccc agacagatta cggggttgtt ttcggcgcgt tcgcaggtgc
    29101 cgtgtattac gtcgccacgg cggcagacgt cccgttattg cgccgcggat gttattttct
    29161 gacgtcgttt atcaccgggg tgctcggcgc cgattttgct ggtgaccgca tcactgcatt
    29221 aacaggttac gaaaagcagg cgctggcgcc gctggccgcc gttctcgttt cggcgatggc
    29281 tatcaaaaca ctggcgtggc tgaacagcca gtcaatcagc agttggctgt cccggtttcg
    29341 tggtggaggg gcggggaatg gttaacgaac ctatcactgt gattaacgtt gccgtctcgg
    29401 ccgttatcgc gctgagactg atgtttttcc gcaaagctgg cgctcagcat tgtgcatggg
    29461 ccagctggct tgcttatggg ctggtgctgg catacggatt tatcccgatc agctgggtgt
    29521 tcggccagta ccgcgacaca accccgatca cgctgatcgc caacatcgtt attgctgcgc
    29581 tggtgctgcg cgcccgcggc aacgccgcga aacttctgtc gagacatcta tgaatcaaaa
    29641 ccaatttcaa gcggcggctg gtattagcgc cgggctggct acgcgctggt ttccgcacat
    29701 taccgccgct ctgaaagagt tcggtatcac ggcgccggca gatgtggcga tgtttattgc
    29761 acaggtcgga cacgagtctg gcggttttgc acagacggcc gagaacctga actacacccc
    29821 ggcggcactg gttggcacgt tcggcaatcg cgtaacgaaa taccaggctg acatgctcgg
    29881 acgcactgct ggccgcccag cacagcagga ggcgatcgca aacctggtat atggtggacg
    29941 gcttggcaac aaagctgcag gtgatggctg gaaattccgc ggtcgtgggt tgattcaggt
    30001 caccggactg gacaattacc gcgcctgcgg cgccgggcta aaactggatc tggtgtcctc
    30061 gccggaactg ctagagcaag acatgaacgc aatgcgctca gccggctggt attggatgtc
    30121 tcgcggctgc agtcgctatc cggatgatgt ggagcgcgta accctgctgg ttaacggcgg
    30181 acgcaatggg ctggatgacc ggcgtgcacg ctacgcccgg gcagtgcggg cgctatcatg
    30241 atcgcgttta actggaagac catgattgcc ggcttggctg ttgccgcact tatcattgct
    30301 gcccggctgg cggcctacta tcacggccaa tacgagcagc aggtgcaacg agccgacaca
    30361 ctgcagtctg aggtcaattc tcaacaagct gttatttctc agcagtcgct ccagttccag
    30421 cgtttcaatc aaatcgcggc gcaggccagc cagcaggccg taacaatcac tgcaaaatct
    30481 caggagcggc aaattgtcta tcgtacgatt atcaaaaccg acccagctgg cggccgctgc
    30541 gttcctgatg atgtggctaa caggctgctc ggctacgcgt acagtttacg tgccagcgca
    30601 gtgcacaccg ctgccggaaa cactgacaca accggttctg gccccactac cgccgactgc
    30661 cgactgacat acggacaggc tgtttactgg attgatccgt tgttatcggc gattgagcaa
    30721 gcaaacgggc aactggcggc gattcgcgag gccgatcagg caaggggaag cggtaataca
    30781 cagcgttaat ttctaattgg cgcatcaaca acaagagagt aatcatggcg gaagaattat
    30841 cagcatcaca acaaattcgc gtcggcttgc tgacaacgct cagttatgac acggcagcaa
    30901 cggcaaaggc gatcgaattc gttcaggatg atcagttgcg gtacaagctg tttatcgatc
    30961 agtacaaccg ggtgcatacg gaaaccgagg ttgtggcgaa aaccatcaag gcaatccagg
    31021 aggcgactga ggcactgact ctgttttaac tcggcattac agcaggcatt cattgagtgc
    31081 ctgtgataat gcttatttat aaaatcctgc caatagcgca gatgtagcgc cattgtcaga
    31141 gatttatata ggttttcttg agcgggtgtt tcgtatatcc ccggcgtttt atttaacgaa
    31201 gtagcggaaa attctgttat gagtgactca gcaacaaaaa gaccgcacgc accgcagtca
    31261 ttcatcacac cagcagacct ttatccgtac acgcgcttaa ccccagcaaa cgacattcat
    31321 gactggataa gcgacaacat catcaccgat gccggttatt tgcataaccc cgatcacggg
    31381 catctggcgg aagctgacat cgcgttcttg tgggcctcga acgcattcga gaaaaaggga
    31441 cgcgtcgttc tcggccagtg tgaagaagtg atgatgcgcg ccggcggctg gcaaaaagcc
    31501 agaatggagc agcagatgta tgaatggttc ggccgagtgc cgcaatttat catcacgctg
    31561 gccgctgatt attgcgccga atgtaatgac ctcgaattct gcgcactact ggagcatgag
    31621 ctttaccaca tcacccaggc tgtcgatcag tttggtgcgc cgaagttcaa caaggagggc
    31681 cgaccggctc tgaaattgcg cggccacgat gttgaagaat ttgtcggcgt agttcgtcgc
    31741 tacggtgcca gccgcgaggt gcaagaactg gttgatgcgg caaacaagcc tgcagaggtc
    31801 gctcaccttg atgttgccag ggcatgcggg acttgcctgc ttaagctggc ttaaatattg
    31861 gactgtatta gacggatggt gaagaatggc tgcactaaaa tcagaagtga aagccttcat
    31921 cattcaaatg cttgcatgct ttgacacccc gtcgcaggtg gtggaggctg tccagaaaga
    31981 atttggtatc aaaatcaccc gccagcaggc tgaatcccat gacccaacaa aggccagcgg
    32041 caagatgctg gcgaaaaagt gggtcggcat gttcaacgca acccgtgacc gcttcctcaa
    32101 tgagatttcc gatattccga tcgccaataa agcctatcga ctgcgcgtac tgcagcgaat
    32161 gtccacgacc gccgaaaaca tgaaaaacat gggcatgacg gcgcaattgc tggagcaagc
    32221 ggctaaagag gttggggatg tttacaccaa caaacagaag gttgaacaaa gcgttgttgc
    32281 cactcataac gttatgccgg ttccctcctg cgataacgta gatgactggg aaaaagcggc
    32341 gcagaaacag cagggcgagg tattgggtgg atgaattaca aagccgtctg gaaacctttg
    32401 ccgggatctc aatcgctctc cctgagttgc ccgtgtaacg aaatcctcta cgagggaacg
    32461 cgtggcccgg gtaaaaccgc cgcgcagctg gcgcgcttcc gtcgcctcgt cggcctgggt
    32521 tacggctcat tctggcgcgg agtgattttc gataccgagt ataaaaacct caccgacatc
    32581 atcacccagt caaagcgtat gtaccgcctg tttaacgacg gggcacgcta tctggcatcg
    32641 gccagtgaat tacgttgggt ttggcccacc ggcgaagagc tgctcttccg tttcggcaaa
    32701 gaagagagcg attactggga ttaccacggc caggagttcc cgttcatcgg attcaacgag
    32761 ctgaccaagc agcagtcagc agagttctac gaaatgatgt tctcctgccg gcgctcatca
    32821 ttccggccag agaactaccc gctggcgaac ggaagcctgt tgaagccaat ccccctggag
    32881 acgttcagca cgaccaaccc gtttggcatc ggtcacacct gggtgaagaa gcgtttcatc
    32941 gaacccgcgc cacgcggaac catcatccgc gaaacgcaaa aggtatttaa cccgcagacc
    33001 gaacgcgaag aggatgtgac gttaacccgc gttgcaattc atggctcgtt caaagaaaac
    33061 ccatatctgg atccgcagta catcgcgacc ttgatggcta tcaaagaccc aaaccgccgg
    33121 gcggcatggg tagaaggctc ctgggacgtt accagcggtg gccgattcga ccacctttgg
    33181 gatgcccgta ttcacgtcat cacgcccttt aagatccccg aaagttggca tgtcgaccgc
    33241 tctcatgact ggggcgaaag caagccgttt tcgtgtctct ggtgggcgat ggctgacggc
    33301 accgaggcaa ccctggaggg cggacgcaaa tggtgcccac cggccggcac gctgattttg
    33361 atcgctgaat ggtacggctg cccccctgac gagctgaaca agggcgtcaa catgagcagc
    33421 accaacgtgg ccaaaggcgt cagatggatt gaccagcggc ttgctggcga ggaagccccc
    33481 cagcccgaag aaacccgcaa agatggacac actatcggac agatgtccct gattccctat
    33541 agcgtcactc gcgtcgaacc tggtccagct gataacgcga tcaccaacac tggcgacgat
    33601 gagttaagca ttgccgacaa aatggagaat cagggcgtca ggtgggtcga atcgaacaaa
    33661 aaaccaggat cccgcatcaa tggcgcggcg ctgttctgcg acatgctaga ggctgtcgtg
    33721 gaggccaaag gcagcgaatc aggtatgcct gaaaatccag gcttttacgt ctttgagaat
    33781 tgcaggggct ggattgcccg catcccagtg ctggtacgcg atgacaagaa tccagatgac
    33841 gtggacaccg aacaagaaga ccacgactgg gatgcaactc gttaccgcgt actgcactca
    33901 ccacaaaaaa ttacaggcat gttggtgcgc tcgcgctgac ggaggacatc gtgaccgaaa
    33961 gcgaaatgaa acagcagcgc gccagtaacg ccagcgtcga aaaagaacgc cggaactacc
    34021 tgtcgtcgct gttcaatggg accagcaaca cgaagcgcca gcgcctctat caggagttcg
    34081 gctacccact acacctgtca ttcgatgact tttaccgcgc ctacacgcgc aacgcgatcg
    34141 ccgatgcgtc agtcagtcgc atggtcgatg gttgctggga agacttcccg gaggtgtacg
    34201 agggtgacaa gaccaaggat gcaacaacgc tcactgcgtg ggataagcag gccaataaac
    34261 tgctcaagcg ctgctggaag cagattaaag gcgctgaccg gcgcaatctg gtcggtaggt
    34321 attcggcgct gctgatccag ataaaagaca acaagccatg gcgtgatccg gtcgatacgt
    34381 cggtggttgg acgcctggcg gagaaggcgc tggttaaact catcccggtt tgggaggcgc
    34441 agttagagcc gattgagtgg gacagcaacc cggaaagcga aacgttcggc gatgtgaaga
    34501 tgtattcctt cgtcgagttg tcagtgggta atagtcagga tgcccggcca ggtcggatcg
    34561 tgaatgttca ccccgatcgc gtaatcattc tggctgaagg ctccgacgac ggctctatga
    34621 cctccgggcg gtcaatgctc gaggctggct tcaataagtt gcaggacatc gagaaagtga
    34681 gtggcggggc atcagagggc ttcctcaaaa acgccagccg ccagctcaac tacaacttca
    34741 gcgagaaaac gaactttgcc gcactggcta aagcgcttgg caccaccgag ggcaatctgg
    34801 ccgacgcgct ggatacgcag gttcgccgtc tcaatgacag taccgacagt gccagcttca
    34861 tgcaggctgg caccgccgag gtgctctcag tgcaggctgc tgaccccgaa ccaacgtggc
    34921 gaacggcact taacgaatgg tgcgccactg tacctattcc ggtgaaggtg ctggtgggca
    34981 tgcagaccgg cgagcgggcc agcaccgaag atgcgaagga ctgggccaaa acgcgcatgt
    35041 ccaggcgtaa cggcttcctc accgatgtga tcactgaaat cgttacccgc ttctggacgt
    35101 tcggaatcat cccgcccgcg aaaggtgagg aaatcaccgt cggttggtct gatttgctgg
    35161 caccgagcca ggcagagaag attgccaata tggacaagct ggccgacgtg gcggtgaaat
    35221 cgacgaatgc ctttggtcgt tcggctatcg aagagaacga aatccgcgcc gctggcgaac
    35281 tgcaaccact gcctgagctt gaagatgagg ttccgcctga tggcaacaaa ccaaagcccg
    35341 atcctctgga cgaccctcag tcagaagccg aaaagtccgg tgataccacg gtcgaaagtt
    35401 gaccccacaa tgtcgcgaaa gtccgtcagc aagatggcgc gcgacatcga agaccggtat
    35461 tacgcgataa aactggcatt gaaagcgcag tttgaccggc ttcttattgg tcgggagagg
    35521 cttggcaata gtcagacatg gcatttcctg tgccatacca acggcgccga tccggcgttg
    35581 taccaggtga acgccgggac gttcatttac gacatgagcg cccagcagtt ggccgacctg
    35641 ctgcaaatcg tgcaaaccat actggacgat cacctgttgg agggcggtga gcgcaaccta
    35701 tgggcaatga gccatgttgc gtcggagttc cagcgcggta cgcagcaggc gttcaataat
    35761 ctgtcggtgc agtcgcaagc ctacgcccag cagaccacac tggcgcagtt gctgtcctct
    35821 cccgcgtacc agaaccaggt ggcatccgcc tacatcagca cctacagcga ctggaaactg
    35881 gaaagcgacc gggcgcgtgg tgatttggca aacgtcattt ctgatgctat cgggcgcggg
    35941 gtaaacccgc gagaaacagc gcagatcgtc agcaagcgac tggatgtgtc gatgtcgcgg
    36001 gcaatgaata tcgcccagac cgagcaggtt ggcgcgctgc ggcaggcgca atggaatgag
    36061 acggactggg ccgccgaccg gctgggactg aataccggcc tgctgtggtt gtctgcgctc
    36121 aaaccgacga cgcgctggtg gcacgccagc cgacacggca aggtctacac caccgaagag
    36181 gttcgcgact tctacgccga gaacggcaac cggtacaact gctactgcag ccagattccg
    36241 gtgctgctta acgatgatgg cagtatcttc aatgacgggt tggctgataa gttggcgaaa
    36301 gagcgaaagc aacgaaaggt aagtccatga tataaaggat atgagcgttt aacaatcaag
    36361 gagagctcat gtttttaaat acaaatttgt atgttggaat accatccaat caaatatatc
    36421 aaaacacagg tggaacactt ggcgttataa ctgcattcaa ttctgaatcg ggtacgaacg
    36481 aaaatatctt atcttttacc gccaagtgta cggacgaaca ggacgcaagg ttgaaagccc
    36541 aatatctcat taaagaaaaa aacaatacta tttgggtatg gttgggagaa aatgccaacc
    36601 caatagaggg taagttactg gacatcaaga cgcattctga tcacgctaat cacgtaacat
    36661 acgacaaaat cgaggttatc tttaaaacaa gtttctgacg tttttttaaa ccccaaggtc
    36721 gctccggcgg ccttttttat taccaaaaat ccacccatga ggacgcaacg tgacgctatc
    36781 cagcatccac gttaaatccc tcgccatcaa cgcctccaat atctccacga caactatcga
    36841 cggtcaggaa cactacgtta tccgtggtgc ggttccgatc gtcgacgata tcgtgatgaa
    36901 cggtggcctg tacccggcgg aggaaattaa caatagctac cagtcgatgg aaggcaagtt
    36961 gatgccactg tcgcacccga aggttgacgg tcattacgtc agcgctaatg acccgcgcgc
    37021 gatcaataaa ttctatgcgg gggcctgggc gaaaaacgtc ggcaagtcag gcgatcaggt
    37081 cgtcatggac gtgtacatca ataaggctgt cgctgagaca aaacctgatg gcaaacgcct
    37141 gattaatcgc ctcgaagaaa tgagcaccgg gactaacgtt gaccccattc atttatcaac
    37201 cggtcttctt accaacaaag agacgaaatc cggcgagtct aagggcaaaa aacacagttg
    37261 gattgcccgg aatatgcagt tcgaccatat cgccatcctg cttgacgagc cgggcgccgg
    37321 aacgccggag gagggcgtgg ggatgttcgt taacgctgac ggacagcaaa gcgaagttga
    37381 gcgcgccagc ctgaccgacg cagccaataa cctgaaagat ggcctgtgga accgagtgaa
    37441 gtgctttatt caccacaact cagacgcctc tttcgatgaa atctaccaga tgttgcgtga
    37501 tgccattcgc gtgccaagtg gcagcgatgt ttaccgctat gtcgtcggcg tttggccgga
    37561 caaattcatc tacgaggagg gtaataagct cttccagcag aaatacctca tcgacgacag
    37621 cacagtcacg ctggtcggtg atccagtaga ggtcgtgcgc aaacccactg agtacgaagt
    37681 gaaaacaaac ggagaagcaa atccaatgaa agacaagatg atcgccgcgc tcaatgccgc
    37741 aggcgttaaa accgaggggc tgaccgacga tcaggtctgg gatgcctata accagcaggt
    37801 gaagaaaaaa gagggtggag gtgacccagc gggcggcacg caggtcaatg cggaagccat
    37861 taccgccgcc gtgaacgcag ccattaagcc gctgacggac aaaatcggca cgctggaaat
    37921 tcagttgcag gccaatgccg agaaagacct gaccgacaaa cgccaggcgg ttaaggctaa
    37981 attcccgttc atgaccgaag cggcaatcaa ctccctggta ggcgacgcgc tgaacgacat
    38041 gtacgcgcaa tgccagacca gtcacggtct tcacggtcaa ttccaacagc agaacgccgc
    38101 tgatgtcgac cagtggaaag actacgacct caacgctggc atggatcagg agaaaaaata
    38161 atggcgaatg tcatctatcg cggaccggtc gagcgtgaac cggaaaccat caacctgcct
    38221 gtagcggccg cactcaatcc aggagtggcc gtaaaagttg tctccggcaa actggccgtg
    38281 gcgaccgata caaccgggcg ctggctcatc ctgggcaatc gtcgtttcat cggtcaggca
    38341 atcaccaccg cctatgcgat caacgaaacc ggcgtcgctt atcgcgtaga aggcgagcag
    38401 gagtacaacg tgcgcctggc tgcggctgcc tacacggtag gccaggagct tactgtcggc
    38461 gcgggtggtg tgttcaaagc cgccgcaacc ggcaaccagg tcgtcgccac attcgacgaa
    38521 aaagcagggc gcactctggc ggcggaaggt ttcgccgatg tagtgatcct ctccactccg
    38581 tacgccaaag cataaggaaa aagcagaatg cttaagttta ccctcgatca gcaaaagctg
    38641 atcctcaatg cgcgtcgccg ctgggacatg atgcagcgca gcatggctgc tcagcatggt
    38701 ttcgcagtca acgatgccaa cgggcagttc attgctcatg atgccctggt cggtaacgca
    38761 tccgtgctgc cgaaagacgt ctggggtgag tgggaccgct cggccattac cgtacagcgt
    38821 gatgtgctgt cggtattcaa cgacctggcg gcgtcagttt cccgtccgat ggcgctgggc
    38881 aagattgtcc attacttcat gaccctgtcc gattctggtg atgtgaacat cagcctggat
    38941 gggcgcggca aagcgaagac tgatcagcct ttaatggatt acgaaggaac gccgctgccg
    39001 attatcgaca gtgagctgtc tttcggctgg cgccagatgc tggccgcgca aaccgaaggc
    39061 tactcgctgg acagcgacgc aatctccaac catcagcgca aagtggctga gaagctggaa
    39121 gatatggtgc tgaacggtga cgcgaatatc aacgtcggcg gggcgaccat ctacggcctg
    39181 cgcaatgcac ccaatcgtgg taccggtacg cacggcctcg acctgaacgg cgcaacgggt
    39241 acgcagtggg tcggcgctat ctctgcgctg attggccttc ttcaggctaa aaacttctac
    39301 gccccggtca ccatttacct gaactacaaa gactggttct acgcgtccgt caacgactac
    39361 gcggcaaact atccgaagac catcctgtcc cgcatcatgg aaatccatgg tgtggcggcg
    39421 ctggtcccgg cgtccaaagt accggtgaat gaaatgctgg gcgttgtgaa gcgcgccgac
    39481 gtggttcaga tcctgaacgg catgccgatg accatgcgac ctaaagcccg ccagaacccg
    39541 gaagatgatt atgtcttctc ggtactggct gctgcggcgc cgcagttcaa acacgacgcc
    39601 aacggccagg ccggttacgt ccagctgacc aaagcgtaat gcatgggcgt cgggcccatt
    39661 tctttctgga gggcttatgc ctaacgagaa aaaacaaaag tggatcctca cccatgacag
    39721 ccatgcgctg aagaagggtg atacgtacga aggcactgag ttgccattgt ggctggccgg
    39781 caaaaccgtg cttgtgggcg acgctgaatt tgaggtggcg acgccgggcc aactggcaaa
    39841 gctccaggcc gatctggacg cggctaatgc tcaggtggtt acgctcaccg aaagcgctgc
    39901 ctctgttcag gcggcgctgg acgaagaaaa gtccagggtt tcagagctga ccgccagcaa
    39961 aacccaactc caggccgatc tggacgcggc taataagcaa ctgactgaac tgcagaagaa
    40021 ggtgaaataa ccatggcggc ccagatagct gccgatgacg tgtctgctct gcttgccgag
    40081 ctgggctaca gcattccatc tgtggtgctg ggcctgattc tggcgcaggt gaatgccatc
    40141 gatgagtgtc tggatgcagc cggacaagac gagagcacgc aaaagctgat caagatctat
    40201 gccgcggcgc ttttagccgc ctcatccggc gctcggcgca tcaaatcgca gggggcgccg
    40261 tccggtgcat cccgctcatt tgactatggg gtggacggta taacctggtt gcgcgactca
    40321 ctggcccggc tggacgttca tggctgcacc gccgaactac cgatcagcgc tggcaataat
    40381 gtcggatttt ttatggttgt aggtgggtgc aaatgagctg gattactgtg aatgagcgcc
    40441 taccaaaacc tttcactcgc gtctgggtgc tgacggacac cggcaggcag atcaccggct
    40501 acatcaaatc tgacggcgag tggttcatca actgcccgcg cattcgggtg tcgggcgcgg
    40561 ttgtgctgcg ctggagggaa tagccaatgt catcagcagc aaactggagc tacacagcaa
    40621 aggccactat ttggcacaag ctggctggga tcgacgaata cggcgacccg ctgggttacg
    40681 ccccaccgga agtcattctt tgcgattatg agggtggcct atcgaagcgc gtcggcagcc
    40741 taggcgctga aaccgtcgtg aaaaacacgg tttggactga gtacgcgctg gctgccgccg
    40801 gtgattacct gctgattggc gaatcaacag aggctgaccc ggtctccgcc ggagccgatg
    40861 aggtgcggca ggttatacgc tacgccgaca cgttcgagcg gctggcggac gattgggcaa
    40921 ttttgacagg ggcgtaatca tgggggcaaa agtccgtggt atcgctcagt ccaagcgcgg
    40981 actggagcgg atcatcaacg atattcaggg gcggaaagct gtgcgcgcca ttcaatcggc
    41041 catgctgatt ggggcggcgc aggcagcgct gtacaccccg attgacacgt ccacgctact
    41101 gaatagccag tatcgtgagc tgaccgtgcg aggaacccgg ctgaccgggc gcgtaggtta
    41161 cacggccaac tatgccgtgt acgttcatga cccgaatgta ccgcaggtat tccgacgcgc
    41221 tacggcagaa aaggagtttc tgaccaaggg gtttaatgat acgcgggagc agatcaacga
    41281 agtcatgcgt aaagagcttt cgctatgacg ccgcttatgt atgagcgggt tcgcggcatg
    41341 ttcggcgatg caggtctaac tgacggcttc accgtccaac tactgatgtt cgacgacccg
    41401 ggcgatctgg cgcaggccgc aatggtgttc aggccgaacg gcgggacggc tatccgtaac
    41461 gacatggggg ctgaacatta tgtactggtg gatatcatcg gggccaaaga caagcgccgt
    41521 gatgctgcca gtgccgtgca gcgcatcatc gactatgtac aggacaaccc gatgggcgat
    41581 gagtgcgtgg gctatatcca gaacatgggc ggcattccgc cgccggtact caccgaggag
    41641 gggcggatag tgtttcgtct gcagttcgcc tgcacctatg gggaataagc caccccagaa
    41701 ttatcgccac ccgcgggtgg cttttttatt tcccaaatca cggagaacgc aatgagcgat
    41761 tgcactaact ctaatgagcg cctattcggc ggcgcggtcg tgctggaagt tgccgacggg
    41821 tgcccggaca cgaaaccggc agaggctgac tggaaggcgc tggcggccgg caccagtaag
    41881 ggttttgact ttaaccccaa cacggtgaca tctgacgctg acgatggggc tggttttgtt
    41941 gagaccatca tcaccaacag cgatttcact atcagttttg agggtgaggt gcgtaagagg
    42001 gaccgtcttg atcagttcgg aatcggtaaa tacatcaagt acttttcgac tgagctggcg
    42061 gccaagcgcc agcctgctat ctgggttcgg atggactatg gcccggtaga gttcgtcggc
    42121 tatatgaaca tcacggcgct gagctctgac ggcggtacca acgacatcgt gacgttttcc
    42181 actgagttca aagtgggtga cgcatcgact atcgaagtga atgaggtgac caccgttccg
    42241 gtaaccggcg tgacgctgac cccggcaacc agcacgggta cggctggtgg caccagcacg
    42301 tttacggtga atgtcgcgcc agccggcgca accaacaaaa acttcacagt tgcatcaacc
    42361 gacgcgacca aggccacggc gacagcctcc ggcaacacca tcacggtcac ccgcgtcgcc
    42421 accggcacag cgcagattgt catcaatacc gatgatggaa attttgtagc cacccacaca
    42481 gttaccgtca gttaacgggc attacaaagg ctgccagttg gtggccttga taatgcgtgt
    42541 ttacccagga gaaaccatga caccatttaa agcgatcggc gaatgtgtta tttcaatgct
    42601 cgaccaggat tatctgtttc ggccgtcatt cgctgcaatg acgagggttg gcgagccggc
    42661 acagattgtc cgggcctttt atgacctgca taacgacgaa gcgcgccaac tcatcgagcg
    42721 cgccgcggcc gcctatggtg tcgtgccggc atggctggta acgcacgtgt cccggccggc
    42781 attcagtaag caggcagcac tgcaggcggt aacggtgctg caggcgtgct gcgacatgga
    42841 ttgctcagcg ctgaccgggg aactggtgcc gagaaagact ggcaaaggtg gcgttatctg
    42901 gcgccccggc tcgatgccgg tttctgacgt ggtgctggtg gcgcagtcgc tgctcactca
    42961 tggcatcatc ggtaaggcca gggtccgccg cctgcagcgc cacgaatcaa cggaacgcac
    43021 aactgagttt cacgccatcg aatacatcaa cgcggcgcgc tcgcatttca gcatgagtcg
    43081 gcatgaggct gaaaatctga cgatgacgga gttcgttatg ctgctggccg ccaaatatcc
    43141 agaccagaaa gggttcactc gggaagaata cgatcaactt gcagacgatt acatgcggcg
    43201 caaggcggcg aggattgaga aagagaagtg aggggcgtgg cgctctattc tctttcgtgt
    43261 ttttgctttc caatcctcgc tttttggatt taaaatgttt ctgatttaca caaaaggaaa
    43321 cagttaatga aaaaaataat agcgctggca ttaggagtga tggccttggc aggctgcgcc
    43381 acaaaacaat acccgcaggc gcccaccgta actggcgagg aatccgctgt tttcgattgc
    43441 aaggctgtgc agcaggaaat agcaagagcc cacagcatac aacaagaaat agaatccact
    43501 ggacgattcg atgggcgcac agtccttggt tttctcggag atttcggagt agggaacggc
    43561 atggcaaagg atgaggctcg taaaaaagcc gagtccagac taattcaact gcaggccatt
    43621 gaatcaagca agtgttcacg tgcaaacaaa ccagtttaat tgcgcgttgt ttttcaatat
    43681 cgtccgattt cccaaccgat gaggcgggcg atacggctaa ttctatttag ccaatgaggg
    43741 aatgggcatg aagaagctat ttgcaatcgc tgtgattacg ttttctctgt ttgggtgtgt
    43801 ttcgcttggt aataacttcg atgaagcaag gctagtgcac gtcagcaaag gacaaacgac
    43861 aaaacaagat gttatcgctc tttttggtga tccatcaaca acatctattg attcagatgg
    43921 caatcagata ttgatatggt catacagcat tggtaatggt tttggtggag ccatagcgaa
    43981 aatattaaca atcaagctcc atgacggaaa ggttgactcg tattccgtta cccaatcaaa
    44041 aatttaaata aaaacaaata aacgtaattg accccgcttg cggggttttt tattgcctgg
    44101 agaaaagcaa atggcgtcga aagctggtga tatttattac gacatagagc tggaaacagc
    44161 acagttatta tcatcacaac aaaaagctaa ttccgcactg gattctctgg gtaaaggctt
    44221 tgaccgaacc acgcgcaacg tcgagtctac cgaaaaagcc atcctgagcc tttcacgtgt
    44281 tgcggtggca ttgacggcgg cattatccgt tcagcaggtg tccgaatatg cgaacgcatg
    44341 gacaaccgtt agcaacaagc tcgctaactc cgtgcgccca catgagcaac tggcagatgt
    44401 tacccagcga gttttttcga tcacgcagtc cacgcgctcc agcctcgatg ctaccgcgtc
    44461 gctgtatgcc cgccttgaac gcgcaacccg acagtacggc actagcgcca gcgatttggc
    44521 acgcctgaca accgtcatta atcaggggtt tatcgtttcc ggtgctacca cgcaggaggc
    44581 ggagaacgcc atcattcagc tatcgcaggg actggcatct gggacgctac gcggcgaaga
    44641 atttaactcc gttaatgagc agggcaaccg gttgatggtg gcgctggcgg attcgctcgg
    44701 tgttggtata ggccaactcc gcaacatggc tgcacagggc aaactgacca ccgatgttgt
    44761 ggtgaagggg ctgctttctc aaggttcgaa aattggcgat gagttcgcca aaacccttgc
    44821 cacaacttcc caatctctgg aggtggcgaa aaacaacatc accaagtttt tcggtgaaag
    44881 cacctctatc caggccggtc tatcgatatt caacagcgca gtaatctccg ccagccaaaa
    44941 catggacgcg atgagtggcg cgctggcggc ggttgcgctg gtgatgggcg ggcgctttgt
    45001 tggtgcgctg acgatggcgg cggcacagca ggtgaaagcc atggcggcca gcatttccag
    45061 cgccaaagcg gcggcgcaat ccgcagcggc ggcagagttg gacgcagcgg cacaacttcg
    45121 ccttgctcag gccaacaagg atgcggcctt gtctgatcta aatctggcgc aggcgcgact
    45181 gaacgtcata cgggaaacga acgccgcggg agtggctgag gtggcgttag ctgactccaa
    45241 agcggccagt atcaggacaa atctggctca aattgaagcg gaaaaggcgc tggaaaccca
    45301 gcgtctcaac gcgcagatca gcgagcaggg gcgcattgct acagctacac gcatggccga
    45361 gttacagcgg gcatctaccg cgctcacttc gcaactgtcc gcgacggaat ccgccaccgc
    45421 gcaggccaga gctacggcga tagctcaggc cgaggcgcag gtgtcatctg ctcggctcgc
    45481 tgccgctgat gctgccggcg tagctgctgc tgccaatggg caatatgcgg catcacaaga
    45541 ggcgtccact gtcgcaacca aagccgccag cctgtcgatg ggtatattgc gcggcgcgct
    45601 gggccttgtt ggtggcccat ccggcgtcgc catgatcgcc gctgccgcca ttttttactt
    45661 ttaccagaag gcgcagcaag ccaaactgga gagcattgat tttgccgata aactggatgg
    45721 cgtcatcgcg aaaatgcgcg aaatgaactc aacccaactg gccgcgtcta tcgctaaggg
    45781 gcagcagtca ctgatcgatc aggctgatgc aatatctgac ctccaatctc ggttatccga
    45841 attgcgtgcg gaggaatcaa aatatgcagg actggcgaag gcgttcagca gtgagggtgg
    45901 ttacggtgtg agactggctg aaatccggcg ccaaatcacg attgctaccg gcgatcttga
    45961 tgctgctgag aacaagcgca gccagacagc cagtaaggtc ggcatcatgc aggcacagat
    46021 gaacggtcag ttccagcagg ggattgacct gctcaagcgc aatagccagg aggctggcgt
    46081 gtccgccggc atgatgagtc acttgggtca gatgattgat gttgcatcca aggccaaaga
    46141 gcgatttaac gccacctcgc tgaaagtgca ggtcaaccct gacgcgcaaa agcaaatcga
    46201 cggcctgctg ctgcaggcca agttgatgag cattgtcgat aagcgtcagc gcgccgttac
    46261 cgaggctcag gatgaggcga ggtctaaggg tggcaacgcc aatcagatcc gcgaagccgg
    46321 ggagtacgct gctaagctgt acgacctgaa agaggctgaa tctgatcggg aaaaatctca
    46381 gagagaggct gaatctgagg cgaataaagc ggccaaccaa cagcaaagca ttgcattgaa
    46441 gctggagaac ctgcgcgaac aaacggagat gacagctgag tccactcgtg aactgactcg
    46501 tgaacaggcc gtgctgcgcg ctcagcagtc tttgggtaat ggtgctaccg acgaacagac
    46561 aaaacttgcc ggcgagcttg ctggtaaacg gtgggatgtg gctaacgcca ttcgtgcgga
    46621 agccgccgca cagaaaatgc tgcctgaggc agcggagaac aagagttatc aggatgatct
    46681 gaaagacctg cagatcgcgc tgaacagcaa aaaaatatct cagcagcagt ttgatactac
    46741 tgctgagcgg ctggagcagg agcatcaggc aaaactggca aaaatccgct cccagcaagt
    46801 ggtcacgcca gcccaggagg cattggggca ggttgaccct gtacagcaac tggcaaacca
    46861 gcacgctcag caattagcgc ttatccagca gtttgagcag cagggtgtgt tgcagcatca
    46921 acaggcactg gcgttgaaaa actcgtatga cacgcaatat gagcagcagc gcatcgcggc
    46981 agcctggcag atctttgagc agcagaatac aacaaacaaa cttctcggtt cggcaattga
    47041 ttcgttgagc agctcggcat ccagcgcgct aaccggtctg attaatggca ctcagagcct
    47101 acaacaggca ctggctaata ttggctcgac aatccttaac agtgtgatca gtgcgctggt
    47161 agagatgggg gttcagcaag ttaaaaacgt catcatgggg caggccgccg ccgccgccgc
    47221 cttggcgtcc actgctgcac aggctaccgc cgccgccgcc gcatgggcgc cagcagcaat
    47281 cagtgcgtca atagcaaccc tgggatcagc tacaacggtt ggcactgcgg catacactgg
    47341 cgcgctggcg gcgtcaaagg gcttggctat cgctggcgct cgatacaatg gcggaccagt
    47401 ttcagcagat agtctgtatc aggtgggtga gcatggtaag ccggagatat tcaaggcgtc
    47461 caacggcaat caatttatga tcccaggtga taacggctct gtgattagca atcgtgattt
    47521 gcagggagga ggcggtggac atgcattcaa ttatagcccg gtaatcaacg ttaacggcga
    47581 tcctgacgcc cgcacgctag cgatgatgca ggacgctgtc aagcagggtg ccatgcaggg
    47641 gtatcaaatg gtgagccagc atctggcgac cggccggggg caggtgtcaa aggcgttaag
    47701 caacggctgg ggaaccaagc ggagaatggg ctaaatggca atcactacca acgttaacta
    47761 tccgtgtgat tatctgccga tgccacaacg caccgggcac gcatttaacc ctgtcagccc
    47821 aatgatcagg acgcaattaa catccggtcg atcgcgccag cggcgacttt atacgtcaac
    47881 accaacgcag gccggggtaa cgtggatttt ctctgatata caggccgaac ttttcgaggc
    47941 ctggtatagg gatgcaatcg ccgacggcgc agactggttt aacatggacc ttcggacgcc
    48001 actgggggtt gagtcgtatg tttgccggtt taccgatatt tatgatgggc caacgctgat
    48061 cgggtttggt cggtggcaac ttaccgccac gcttgaattg tgggagcggc ctatattgcc
    48121 gccgggatgg ggggagttcc ccgactacat catcaacagc agcattatcg atatggcaat
    48181 taacagggag tggcccgaat catgacggta ctcaatagat tgtatgcctc atccggtgat
    48241 gaggtaatta ttgaaaccct gcagataaat ataggcgatg atgtacatta cctgtgcaaa
    48301 gggtatgagg atgtcacggc cacaaccgag gctgataatg tcgtcacgtt cacagcatgc
    48361 gctatcgata tcgctctgcc ggcgcgtaat agcgacggaa cgcaggattt acagtttgcc
    48421 atcggcaaca taaacggcgt ggtatcaact gcgatcagga atgcgctgaa taatctcagc
    48481 ggggccactc tcacataccg taattacgtg tctactgacc tcgcggcgcc agcctctacg
    48541 ccctataccc tgactatcaa gtcgggatac tggacggcgt tagaagtgca gataaaggcc
    48601 ggttacatga acatcctcga cacgtcgtgg ccgcgccacc gctacaccct gccttattac
    48661 cccgggctca gatacatgag ttaaggagac cacatgttta accctgacaa ataccgttct
    48721 gtctcctggc agaagggcgg acgcgcttac ccctatcttg attgttttgg cattgtaaat
    48781 gagatacgtc gagatcttgg gttgccagaa tggcccgact ttgccggtgt tacaaaggac
    48841 gatgacggac tcgaccgtga ggccagaaac ctgatgctat cgctggagcg ctgcgagcca
    48901 tgcgccggcg ctggagtagc ctgttattca ggctcaacag taacgcacgt gggaattgtc
    48961 gtggaaatta acagccggct acatgtagcc gagtgcaacc ccaaaactaa cgtcacgttc
    49021 ctgccgcttg gcagatttag gcgtcgattt gtaaaactgg agttctggcg atgactatca
    49081 ggatttaccc gtcgagatta cctagtgaac cgctggagac acacggtcac gcagcaacaa
    49141 cgctgctgaa atggttacaa tccaatgtgc gcggattccg gcccgacatg aaccacccga
    49201 tcagcattga tgtggacggt aaagccatcc agccgtcgga gtggtttgat tgccatatct
    49261 caccggatag cgatgtgcga atttatcctg ttccatatgc cgtcggcgtt gttgcatggg
    49321 tggcaatcgc gctggcggtc gcctcggttg cgtatgcgtt atttttcgcc cccagcgcga
    49381 gtgggttgaa ttactcatca gtcggatccg gtgattcact ggatcttaac ccggcaaaag
    49441 ctaattcggc caagcttggc gacccaatcc gtgaggtgtt tgggcgttat cgaatttatc
    49501 cagactacgt ctgccagccg gtatccaggt ttaaaccaga tgatcccacc gtgatggtta
    49561 cagagatgtt cctctgtctt gggatcggta cgtttgcgtt tgatgacgga gacattcgcg
    49621 ttggcgccac tccgattggc tccctcggcg atggatttag ccacacaaaa tatgcgcccg
    49681 gcgctgatgt attaggtgat catagaagcg aaaattggtg gaactcgacc gaggtcggtg
    49741 gaacatcaac cggttcaggt ctggacatgg ctcaaacatc gccaacatct gatgatatcg
    49801 tcgccagttc tgcgactgta gccgggtttg acatcacatt taatggcctg agcacaacga
    49861 cagacgcctc aacaggcgta gtaacatatg atttaccaga ttcatttgtt gtcggagcga
    49921 tcgttgaaat agtaataccg gcgaccgttt ccgtcactaa ctcaggggca tacagcagga
    49981 taaccagcaa tgcgctctca gagatagtcc cggccgtcgg catggccgtc acgctgacat
    50041 acaacggtgt tgattatgac ctgttcatcg catcgtatac accgcaatcc accggtgtta
    50101 ccgccagtgt tacgctggct tatgacagcg caaccggcgc agcgtttacc gggatccctg
    50161 ttggtgatgc taggctagcg atctcacatg ccggtagtga gtacaaaatc aatgcggttg
    50221 atggcaacac gatcactgtc gatcgggtaa ttggcggcgt tattgatggc acctggacag
    50281 gttattcatc gcgcactgtg ctggattttt ctgccagcgg catcaatgac tcaaaccgct
    50341 ggatggggcc gttcttagcc tgcccagaga acgaaaccac tgatgccatt gaggtgaatt
    50401 tttcattccc gaacggcatt tgtggtttcg gcggcagcgg cgataagcag ccgcgcagcg
    50461 tgtcgtggga gatacagtat cgcatctacg gttcagaggc tgggtggtca aacaaaaccg
    50521 gcacatacac ggctcaaaac ataaatggca tggggtacac cgagcgcatc aacctctcca
    50581 gccctggact cgtagaggtc cgctgtcgcc gaactaatga gcagggagaa aataacgccc
    50641 gcgatagcat gtactggcag gcactacgca gtcggttgtc gggtcgcccg gcatcatatg
    50701 ccggcgtaac gtgcatgggg gtgacagtag agacgggggg taagctggcg gcgcagtctg
    50761 accgccgggt taatgtcgtt gtgacccgta attatgagga tggcgcagca cggacgatat
    50821 ctggcgctct attgcatgtc ggcaactctg tcgggcttgg catggacacg gatacgatag
    50881 ctgaacttga gtctacgctc tggacgccgg gcggtgattt ttttgattac tcgactgatt
    50941 ccgccagctc aaatagcagt ggttccagct ctgtatcagt acttgatatg ctcaacaaga
    51001 tcacctccgc gggtaaatcg tatttcctgc tgtctgatgg tctggcgtct gtcgggcgcg
    51061 agggcgttaa aacatggacc gggataatca gcccgcagga aaccaccgat catctacaga
    51121 ccgcattttc agcgccgtca gatgatgatt acaatggtgt tgacgtcaca tacattaacg
    51181 gctcaacgtg ggctgaggaa accgtgcagt gtcgaacgcc agacaatccg acgccgctga
    51241 aaatagagag ttacacgctc gatggcgtgc tggacaaaga tcacgcgtac cgcatcggta
    51301 tgcggcgcct gatgaaatac cggcagcagc gcctgacgtt cacggcaaca actgagctgg
    51361 atgcactttg ttataacgtc ggtgatcgga tcatttttac cgacgacata ccgggcaatg
    51421 aaaccgtgtc ctgtctggtc accagcatga gcactgccgg tggcgtaacc acggtcacaa
    51481 ccagcgaacc gctgaactgg tcgtatgaaa atccacgagc actcatccgt taccaagacg
    51541 gaacggcgtc gggactcatg gtcgccaccc gcataaacga atacgcgcta tccgtcccgc
    51601 acctgccgac attcgaatca attgttatgg gagactctgc aatagaacca cctaggctaa
    51661 ttttttgcga ctccgcacgt gttggatatg acgcgattat ctcagatata agcccccaaa
    51721 ctgacggaac gtgccaggtc accgccagcg aatatcgcgc caccttctac gactacgata
    51781 gtgcagcgta ccccgggaat gtctaactaa cccatcacaa acaattaaaa ttgagcccgc
    51841 cttgcgggct ttttttattt tcagaggtca gagaaatgac tacgtacaat accgggaatg
    51901 cccttggttc cgccgccgca aaggatttat acgataacgc ccaaaacctg gatatctttg
    51961 ttaatgatcc agcaaaccgt gtggcaccgg acaggcttgg cgtgcagcgt aaaacgtggc
    52021 acggaatcga ggccgatcac gcggaacaaa tggccgcgtt cgactctgat tttgagacat
    52081 ttttaactca atccgggtat cagtatgtgg gggattattc gaacggtccg tttgctttaa
    52141 cgtcgcgcag ccagttgatt cgacatgatg gagaatactg gcgggtggcg gctaacgttg
    52201 atctaccatt tacgacaacc ggcactaacg ctacatcatg ggccaccgat gttatcagcc
    52261 tggtatctgt tggcgacgct gcattgcgca gcgatctagc ggcaccaact ggcgctggga
    52321 tggtcggtag ttccggcggg accgtccaag ccgacatcga cgggttgatt agcggtgtat
    52381 cggcgattag cgacagagta tcgacgatta atgaccacgc cgaccttgtt attgacgatt
    52441 atctgctggc tggcgagaca gcgtatgaca acgccattca gcgtgtgctc actgcttcgc
    52501 ttgctagcgg caggccgatc aagttccttc cccgcatgta caacttcaac agccctgtca
    52561 cgctgaatat ggatgctaca ggcatcaaaa tttacggcgc cggcgtaggc cgcactgagt
    52621 tgcgattccc aaatgctgcc gctggagtta ctcagctaat tatcaagtcc tcagctgatt
    52681 ggtttgatct ggtttgggaa gggatgagcg tccgctcgtc gcacgcagga accttgtgtc
    52741 agattggtaa caccagctac gcggatccgc tgaacgtcgc gcgcctgcag gatttggcgt
    52801 ttcttaacag cggaaccggt ggcaatgatg ttgtggccct gcgcctggct tacggcgttc
    52861 agtgttcact gattaacgtg cgagccaact gctatgccga cggtgccggt actaacgtag
    52921 gccgcgcgct ggttgttgag caagccgggt tcacgtcgta catagcctgc agcttcggta
    52981 atgcgagcta cggggtgtca ttcctgaatg gtgtgtcctt tgcaaataat ttcatcggtt
    53041 gcgatttcga aaacatcaac atcgcgctgt acaacggatc cgtcaattct ggcggccaca
    53101 catttatcgg gtgccagttt agtctatgga ctcagtactt ggctcaggct cccgttggtg
    53161 caacgaatcg cttcctgatc atcaacccca atgtatcgca aacctccggc ttattggacc
    53221 cggctaacgg cgcgggaatt aaattccaga gcgaccagtt gggtgttacc acaccggcag
    53281 tgcctgcatc tggggcgacg gtgacaaaca taaccgggcg cgatgtcgtc gtgatcgtct
    53341 gggctggtaa cgtcagtgcg atcagcagaa acggcgcggc gcaaggcatg acgggcggaa
    53401 cagtaatcct acacccgatg gacactatag cgctgacgta cagcgttgca cccgggtgga
    53461 catggtacaa gctgggatga tggatgattg cagaaagccc ggcacatgcc gggcaatact
    53521 gcaggagctg cagaaaagtg caggagcaac gaaaaagcgc aggaggtacg ggcaataaaa
    53581 aacccggctg acgggccggg tttttatgct tctattgcat tatgctgctt gtggaatagc
    53641 aggcgagcat tcatcaagtt gttgattaag ctgcctaact ttgttaacgc aagactccat
    53701 ctcatcaagc aacttaaata ctgtatcaaa gtcgtatttg tcagccatgt gggtgctcct
    53761 ttgttaaata taaggcttat cattgagagc agatattgct tcgcaaagtg cgtcataatc
    53821 atctgcatca atagccaacg ctaatttatc tgcgtgatgg atgtaatcat ccaactcgct
    53881 caaatcatct tccctatcaa tgttaagtaa atcagccgcc atttttgata agtcacggaa
    53941 aaacttcagt tgcgtaactg tctcagcaaa ggttggattg ttacgcctta aatccggtat
    54001 tggcagcagt cgtgcttttt taagcatcga actaatctct cccaggatgg cagagtagag
    54061 cgaattgaat ttgttaactg cacgtctatg cagtatgtct gctggctctt tcgcttccat
    54121 gctagggaaa tcattatcat caggggtcac taatcatact ccttatatag tcccgatcaa
    54181 cgcgtctttc aataggagtc gtctattatg tgaacagagc gtgtctatcg gtgcaccgat
    54241 cagtgacgta tcttctttgg gagtaagctc agttgctgta tatagtttgc tcataaatcg
    54301 gtcaatcggg aaataacttt agtttcgaaa tgtaattaaa ccttaagaat ttttaaggcg
    54361 ttcgttatcg ctatgaaaat gttagcgaat attccccgat aaaatctatg atgtcagtct
    54421 ttgccgacta tcacacaaca tcattactat acagtccagg tcatcagccc caatccaaag
    54481 aataggcgcg cgattatcca ccaattcctc taattgagta acctgtactt tgagttagtt
    54541 ccagaagata tcaaaatatt tattcgtgaa ccatgtctta aagacggtaa attgaggcta
    54601 aatataattt atttatattt atcactattg ttattatttt cgtgcttatt aatattgtaa
    54661 gcctgatgcg cgctcccgct taagagtcta ccgcctcagc cacctcatct aatgcatcct
    54721 ccatagtctc cagcggatca gtatgcagcg ggatagcaat acccggccag atctttactg
    54781 ccagccaccc gccgaaatcg ctgaaaactg catatgagag catggggcaa ccgtccagca
    54841 tttcgtcttc atcaagtacg caaactgtcg ttccgtgata gtcgattttt ctcatcatca
    54901 attgcgaata aatatccgcc tccgttgatt ttttattcct aaaattagca agaacagtaa
    54961 cataatgata tgtattttat ggcttttctg tttgcttata ttaggattaa agaaattaac
    55021 tgattgtttt atatcaaaaa agcgaggaat ttaaaatccc tcggcgttcg cgctgtgcgg
    55081 gttcaagtcc cgctctgggc accatgtgct aacgccttgt aagataagaa aataatttaa
    55141 agaacatgac cgccacaagg cggttttttt gtgcctgtaa tttggcaagt ggcagcaaaa
    55201 tggcggcagg gtgagagcac tgatttttca ggcataaaaa aagcagcttc cggtaagccg
    55261 ctattgctga ctatggttga ataattagcg gctgccagac tgttggtgct gctgcggtat
    55321 ctttcagtgg attgcgggtg tctttgcacc gcttgttatt caacgcataa tcgccggtgt
    55381 ttttggctat ataccggggg ctcctgctgc gtcgcctttg aaccggtgct tatagtcaaa
    55441 acagttttcc atgcgttagg ttcagcgctt gagcagggga aaggcatata aacgcggaga
    55501 ataacaacag tcattcactg gttaccagtg ataatgcttt attaagaata gtcttagcga
    55561 tatgctgcgt ccattgataa tgaaaaggag tctttatgct taagaattac ttttatgatc
    55621 agcatgatgt cgcaagaagt gatgaagaaa aaagagaaat agtcgtttca gctatactcg
    55681 aaatcatcaa agagggtgcc agcgaaagtg gagtgcaagt cgctctggat gcgatcggta
    55741 gtagaatcac cgagaccgcc gatatcattc agcgtgcgct agagaacgat taattactat
    55801 aacgagttat ggccgcctgc gggcggtttt ttattgccgt cacgacaggt ctattcaata
    55861 tgtagccgcc gggtcgaaac gagaacagcc gctatctcca gccctgaaaa cccgacctga
    55921 tttgggctga aggctatgag cgactggctt gaatgggaat acctcaattt cctggctcgg
    55981 tcgccctgac gtcccagtct gaaacttcgc ttcccagctt taccttcctg tggttcatct
    56041 tgcctcaggg atggagatca ttgcgttgcc gctgtgcccg gttgataccc tgatgcaacc
    56101 gtgacgccgg gcattgcatt gctttttgcc tgacaggcaa taatggcatc cacctggtcg
    56161 gcgcaagtcg ccagcgcggc ttcggtttca tccagcaggc tgttcagctc accgttggtt
    56221 tgcggactgg ccgccgggaa ccggcagggc gtcagtctgg gacagccatt cacggtaagc
    56281 acggccacct gcgaaggcgg ggcgctgacg cagccggata atatcagcag gcagatcagt
    56341 atcagcccag cgtttaagcg cttcgttctc atgttgtaac ctcatcacca ctttttgccg
    56401 ttcagagagc gccgcctgag tctcggcggc catatcgcgc agtcgtgcct gttcaagatt
    56461 gttgcgttca gcctgttcgg acaacgcttt caactggccg gatttttcat ccagcgctgt
    56521 ctgttgtaac gacagtgtct gcgcttgctg gtcgcttaac tgacgggcgt tgtgcagccg
    56581 ccaggactgc acgccgaccc ctgcgctaag cacaatcatg atgactgcga tgatcatggc
    56641 gcttttcatg ccagtttccc gcccgcttgc tggtacacgg cgactagcct ctcggtgtta
    56701 tgctcgcgct gaccgtagcc cgctcccggc agtgaggccc agatgttgtt gcaccgggta
    56761 atggcgctgg taagccagcc ttgcgtaatg tcgtcgagcg cacgctgttc ccgaatcagc
    56821 tggatagcca atgtatcctg cgaatcgggt ccgaaatccg gcaacgccaa ctgggtcttg
    56881 taggctggcc agtaacggta gagctgctga tagcgtccgg ctgccgtgga tcgctgcccc
    56941 tgcttgttga agatttttcc cggacggcca ttggcgaatg gatgatcccg gtagtcggtg
    57001 aaaatctctg gtttgccatc aatcccggtg acaatcacgt cgtagccacg attacaggtg
    57061 agcggatgcg ttgcggttcc ttcggaaaag gccagcatgt ccaaaaacgc aataaggtta
    57121 gggttattga gcatcgttat ttttctccgg tgtacttttt ttgcccagtt ggcgaacacg
    57181 gcgttgaata agcagttcga tagtctggta accggcgatg cccagtgcgg cgccgatacc
    57241 gttgatagcg acgggcgaca ggtcggggaa ctgtaccaat gcaatgcctg ccatcattga
    57301 gacaaaacct cccagcatca cgcgaccaat aaacagccgc agtgtgatgg gctcactgcc
    57361 cgccagcact ttgccgacgg caatcagcgt gccgatgata aatagagaga cgatgctttt
    57421 atctgtttca ttcatgtgtg agtccagtcg ttggtttttc aggcagaaga gtaataacag
    57481 cggagataac aggatgtttt cacgcgttgt ctcgcgttat atgccagtca ttaaaccagt
    57541 tgacgtatgg cgatggcagc gatgggtgat ggctcagtta tcagcaaaca cggggttgct
    57601 ggatgtggta atgcggg
//
