# Supplementary material for: May the Phage be With You? Prophage-Like Elements in the Genomes of Soft Rot Pectobacteriaceae: Pectobacterium spp. and Dickeya spp
Source: Front Microbiol. 2019 Feb 14;10:138. doi: 10.3389/fmicb.2019.00138 (PMC6385640; doi:10.3389/fmicb.2019.00138)
Supplement: Supplementary file 2 [file Data_Sheet_2.ZIP › Supplementary_prophagesGENBANK_files/Genbank FILES _SRP_prophages/phiDze1.gb]

LOCUS       Exported               29868 bp ds-DNA     linear   UNK 02-AUG-2018
DEFINITION  phiDze1.
ACCESSION   .
VERSION     .
KEYWORDS    .
SOURCE      phiDze1
  ORGANISM  phiDze1
REFERENCE   1  (bases 1 to 29868)
  AUTHORS   .
  TITLE     Direct Submission
  JOURNAL   Exported Aug 2, 2018 from SnapGene Viewer 4.2.3
            http://www.snapgene.com
FEATURES             Location/Qualifiers
     source          1..29868
                     /organism="prophage phiDze1"
                     /mol_type="genomic DNA"
                     /note="/genome_id=6666666.357183"
                     /note="/genome_md5="
                     /note="/project=robertczajkowski_6666666"
                     /db_xref="taxon:6666666"
     CDS             complement(94..1185)
                     /codon_start=1
                     /product="Phage integrase"
                     /label=Phage integrase
                     /db_xref="SEED:fig|6666666.357183.peg.1"
                     /translation="MAVRKLASGKWLCECYPLGREGKRVRKQFATKGEALAFERFTMEE
                     IENKPWLGEKADNRSLREIIDLWFSLYGRTLADPKRMMAKLDIICTGLGNPKARELSAA
                     DFAHYRELRLAGQMTDASGIPLAVVKPRTVNLEQRNLSAVFGTLKKLGHWDAPNPLSGL
                     PTFKIAQQELAFLAPNEIKRVLDACAESANPHLLLVTKICLATGARWSEAEGLSGQQVT
                     PYRITYTRTKGKKNRTVPISRELYDEIPRKSGKLFSPCRKAFERAINRTGIQLPDGQCT
                     HVLRHTFASHFMMNGGNILVLRDILGHADIKMTMIYAHFAPDHLEDAITKNPLNGLNWS
                     PKNGGRLAAANGNQAFSSPLTTK"
     CDS             complement(1313..1960)
                     /codon_start=1
                     /product="hypothetical protein"
                     /label=hypothetical protein
                     /db_xref="SEED:fig|6666666.357183.peg.2"
                     /translation="MKYNIAGSEITKEKNLWQVALLARKITMSKLHIVIIISTAMLLII
                     NSFLLAKKTDQLLLDIRGWSNFGFNFTITTLGFLIAGFTIFATLSKPDMMIAMMLHENK
                     EAKIPTLKYNFMAFMKVFISFIACTLIYLFIILLGQTNGFLANIIRAMPYSEIIKPYGI
                     KTSYVVIGTSLVYLVLAIKTFIYNVYAIVMTSVRWEYEKNQKEERERQSNNS"
     CDS             complement(1961..2995)
                     /codon_start=1
                     /product="hypothetical protein"
                     /label=hypothetical protein
                     /db_xref="SEED:fig|6666666.357183.peg.3"
                     /translation="MEFIKKLEFGNYTLKFGNDLVLMDLLDEIVMPSFFEMNYIRSIKD
                     KSDYFFINTEMVVLDDSEEHPVLGIQGRIVKNTVLSRDQIISGSEIIEDYDELETAPSS
                     IFLLILNTHRLILCKEVSGAPSIENFRSTSQYCLTHRWNDYIDETYKQEKEFRDGLEYR
                     LPRVTKKSLREEVPSPKLRITTLTDKKSLEDFINLFNKINRVSIKLLPTNKEEIDNDDF
                     FWQEFGERSENMNSRQASVLFTNPEDGLRHNAVLSQLKASTSLANSQFRMRGFDDAGDI
                     MKGSNEDFSLTCDVKDLSKDINEASQECYSVFKDLVADERIRLPKITEKGTLGKIKKIF
                     ERFK"
     CDS             complement(3250..3822)
                     /codon_start=1
                     /product="Repressor protein CI"
                     /label=Repressor protein CI
                     /db_xref="SEED:fig|6666666.357183.peg.4"
                     /translation="MNFMNFGTGAKAAIERLVEAYGFKNRQALCDHLGVSKSTLANRYM
                     RDSFPADWVIQAALETGVSLRWLATGEGPKFDDARNDVIAIPRQKLIDGKLYDSNYYMF
                     DKAFLSDGLKDPVVILDGDITYIADRQFDEVVDGKWLVEIEGQTSIRDLARIPVEKIRV
                     IGGSVDFDCFISDIIFIAKIIKLTISA"
     CDS             3943..4164
                     /codon_start=1
                     /product="hypothetical protein"
                     /label=hypothetical protein
                     /db_xref="SEED:fig|6666666.357183.peg.5"
                     /translation="MRPQISITLAVPSVSIEKYSELTGLSIDTINDMLADGRLTRHRLR
                     KDKKREKVMINIAAMTVDALADCDISLN"
     CDS             4197..4706
                     /codon_start=1
                     /product="Transcriptional regulator"
                     /label=Transcriptional regulator
                     /db_xref="SEED:fig|6666666.357183.peg.6"
                     /translation="MFDYQIAKQMHFDEACRAFSLRHNLAELARMAGMNQQILRNKLNS
                     DQPHKLTCEELLTLTDITEDATLIDGLLAQLNCLPAVPVNEARAERLTAYVLQATAAVG
                     KVAAESISDERMTQTRRHSLMSTISDGVRYLSLIGLTVQSRIQANPAMASTLDALSGLG
                     ASLTIG"
     CDS             4803..4958
                     /codon_start=1
                     /product="hypothetical protein"
                     /label=hypothetical protein
                     /db_xref="SEED:fig|6666666.357183.peg.7"
                     /translation="MQKPISITPFLRNNQAGASLPVEVRHGKGKQGIIIRPDGRRWSPP
                     KGAFNR"
     CDS             4971..5300
                     /codon_start=1
                     /product="hypothetical protein"
                     /label=hypothetical protein
                     /db_xref="SEED:fig|6666666.357183.peg.8"
                     /translation="MSQSVDHQKWIQRCRDIVFKGESRAQSFWERAALDTREIILFSAK
                     PKLKSRHVNYSWHQFTAEERAAIWGAIKRIRSICDETALFGPDDFLKTRNQNGASNTPN
                     PSPIH"
     CDS             5396..5602
                     /codon_start=1
                     /product="hypothetical protein"
                     /label=hypothetical protein
                     /db_xref="SEED:fig|6666666.357183.peg.9"
                     /translation="MNAAADGALIELLNKARREERKEQHFSFSLRLAALAVRAQQRDLS
                     AAEVVELIRQESERFEHSAQELI"
     CDS             5602..5925
                     /codon_start=1
                     /product="hypothetical protein"
                     /label=hypothetical protein
                     /db_xref="SEED:fig|6666666.357183.peg.10"
                     /translation="MDMPQNPAYNRVDINGRYAIAKVGYDFALGEVQCDNRDGAQPYLS
                     TLAVYQTPITLVNDFVHRSLCAEIRRGTVTDITTMLTEAERLSLLCLNAFEQLENTGTG
                     LSE"
     CDS             5922..7967
                     /codon_start=1
                     /product="Phage replication protein # Replication gene A 
                     protein"
                     /label=Phage replication protein # Replication gene A
                     /db_xref="SEED:fig|6666666.357183.peg.11"
                     /translation="MNPEHNGAYHVVNQWRREQFTRNEPDGLTYVERSLWHLNPLDHQW
                     RQQYLAGMPDYLAKYFGQRYETLFTSDEHKGRRRANTFLLRTLGKSVLPRLRTVTERYQ
                     TQQRAAGDLPFPFGDDLEKLPVYDRDNIRALSQQVADFMAASLRDYTENRIRNTGELTD
                     RYITLLSFRHLGLLTLQAGIQPPYWAQFTKGRHPLSTEKAESGLLRMMSPEWWRARLKR
                     RRDIQREHMAIAVGQVQKAASPYVSRSTLDEWKEQKRRNREFFKAFELEDEEGNRVSLD
                     DKVNASNANPAIRRCELMVRMRGFEDLAQEMGCAGEFYTITAPSRYHAVHSGGGFVEQW
                     SGASPRDTQKYLCGVWARIRAELSREEISVFGFRVVEPHHDGTPHWHLLLFMRPEHIEQ
                     VRDIMAYHARREDADELNSEKAQKARFHYEPIDPEKGSATGYIAKYISKNIDGYALDGE
                     ADEETGENLRDMAKAVSAWASRWRIRQFQQIGGAPVTVYRELRRLGDKQLDNAAMDAVL
                     AAADVGDWAAYTQAQGGPLVSRDALVVRLSYEVTERANQYAEDVQKVQGVYSPLLGSHS
                     AIITRTVQWKIVPKQAAALAGAGVSGGSAAAWSSVNNCTPGLRRRLSELLRLRGFPPDP
                     GLVDVLIRGGNLAMSEGRALKMVNGRLEEVRHTGDCELWEGWNWGK"
     CDS             complement(8007..8207)
                     /codon_start=1
                     /product="hypothetical protein"
                     /label=hypothetical protein
                     /db_xref="SEED:fig|6666666.357183.peg.12"
                     /translation="MINFTIGGENGFKVECADNEAAEKIIAYAVSIGAVVITATSAYAI
                     ANKASEYLLENSSSVFNNFSK"
     CDS             8496..8651
                     /codon_start=1
                     /product="hypothetical protein"
                     /label=hypothetical protein
                     /db_xref="SEED:fig|6666666.357183.peg.13"
                     /translation="MDREFEQSLIVERIAFLAKNAGMDGNDERDMQIALIWIAELAGQL
                     MTLQAA"
     CDS             complement(8658..8978)
                     /codon_start=1
                     /product="Phage protein"
                     /label=Phage protein
                     /db_xref="SEED:fig|6666666.357183.peg.14"
                     /translation="MGHKTLKFNHVLEAGAWNMRVLKIECPECGSKAVIRKTNRKHRQI
                     ADIYCACSDVECGYTFVMNLTFSHTLSPSAKTGDQLLQTVLNNLKPEQRQMALDLLRTA
                     AA"
     CDS             complement(8978..10006)
                     /codon_start=1
                     /product="Phage portal protein"
                     /label=Phage portal protein
                     /db_xref="SEED:fig|6666666.357183.peg.15"
                     /translation="MKRTSHRRQKAQNAPRKKMSIITFGKPEPVLTTGTDYRDVWYDNE
                     FNHYTLPIDRLALAQLVNLNGQHGGILYARRNMVASDYQGGGLSHDDMLAAAFDYLTFG
                     DIAILKVRNGWGEVIALTPLPALYTRIRKTGEFVVLQKGEPLVYPPEDVIFIKMYDPQQ
                     QIYGLPDYIGGIHSALLNSEAVIFRRRYYHNGAHTGGILYTSDPNMTDEIEEEIERQLA
                     SSKGIGNFSTILVNIPNGDKEGVQFIQMGDISAKDEFANVKNISAQDVLNAHRFPAGLC
                     GIIPQNAAGLGDPEKARNTYRKDEVIPIQRRFMASINKDPEIPQNLHLIFDFADDTTIQ
                     GA"
     CDS             complement(10003..11778)
                     /codon_start=1
                     /product="Phage terminase, ATPase subunit"
                     /label=Phage terminase, ATPase subunit
                     /db_xref="SEED:fig|6666666.357183.peg.16"
                     /translation="MAKYSDELIGVARLLYLKRATPKEIAADLNLPNARIIYYWAQKFG
                     WADLLSAESTEEAIERRYQLLAGRDKKTELELQEMDMLIAHAVKLRAQSNKHKEKLAAA
                     GHGNTPGSRSNDDDERPAKKRQYRKNDISSLTKEDFDTWADEHLFGYQKHLRANLGKQV
                     RNILKSRQIGATWYFAFEAFENAVLTGEPQIFLSASRAQAEVFRSYIVNIAQQYFDITL
                     TGNPIRLSNGAELRFLSTNKNTAQSYSGHLYCDEYFWVPNFAHLNEVASAMATHDKWRT
                     TYFSTPSAKTHQAYPFWTGEEWKRGNKKRAGVNFPGFDELRDGGRLCPDGQWRYVITME
                     DAIRGGFNLASLEKLRNRYNVDTFNMLYMCVFVDNKDAVFSFDDLERCGVDPATWQDHD
                     PTAPRPFGNREVWGGYDPARSGDLSTFVIVAPPIYEGEKFRVLLVVNWHGMNFRYQANQ
                     IKKLFQRYHFTYIGIDVTGIGAGVFENIQHFAMRQATAIRYGVETKNRLVMKAADVVES
                     QRIEWDQDEKAIPASFMAIRRTTTASGNAMTFIADRSAETGHAEAFFAIAHALDNEPLN
                     YENKPQSRWRLKKAA"
     CDS             11929..12771
                     /codon_start=1
                     /product="Phage capsid scaffolding protein # Fam Scf032"
                     /label=Phage capsid scaffolding protein # Fam Scf032
                     /db_xref="SEED:fig|6666666.357183.peg.17"
                     /translation="MSMSQLMTNWICIATEGETVDKRVMERQWLIDAAETYDPQLYAAL
                     IWPEHEEWFGNMGEVLALKTETGDDGLLRLFAQLRPNHQLLQANREGQLLFCSVELTPD
                     GNFRGTGKTYLEGLGVTNTPASVGTTRLRFSSKKRGRLFGALKPLVIDEVKEIKGNSMA
                     SKSWHSLFGIKPKTFAEGEGENNDAGGGDKLQALAEALAELESRVTALESQQSQTNDAV
                     EAVQDDVDTVKEVVDTEDFATLRNNLPKILKNFGKLDRSITKLPQRQIGNKPKGFNFL"
     CDS             12826..13857
                     /codon_start=1
                     /product="Phage major capsid protein #Fam0066"
                     /label=Phage major capsid protein #Fam0066
                     /db_xref="SEED:fig|6666666.357183.peg.18"
                     /translation="MFLNQRAREYLSAYSAGLAQEYGVADTARYFALTDPKETQLRAAL
                     LERVDFLSMINVLDVDQLSGQVVSVGSSALHTGRKEGGRFIRQVGVDGNDYKLVETDSC
                     AALPWDLLSVWANAGGEDEFFQLVQAFSNEAFALDMLRIGFNGNSVAKSTNPDKNPNGE
                     DVNIGWHQRMKDFKDGQQIITDRVVLDENGDYKSLDAMASDLINAKIPQQYRNDPRLVV
                     LVGADLVAAEQYRLFQKADRPTEKIAAQMLDSTIAGRPAIVPPFMPGKRMTVTTLSNLH
                     IYTQRNTRQRKAEFVEDRKQFENKYLRNEGYAVEYPELYASFDESAVTVGTVAEPMEKP
                     AGA"
     CDS             13861..14562
                     /codon_start=1
                     /product="Phage terminase, endonuclease subunit"
                     /label=Phage terminase, endonuclease subunit
                     /db_xref="SEED:fig|6666666.357183.peg.19"
                     /translation="MALSPAQRHNARMVAEQQLSRCQAVSGDHSLHVQRRALENDVARL
                     RSQPTLRDRVEMKRRELLPRWLPTVQRYLDSGEVYQNPVFAHCVVWLFDVEEFDQGLAW
                     ADIAIAQGQSTPDNIRRTFAAFVADTVLAWAQQTADMGQSVEPYFSRTFKNVAEKWRLH
                     EEITAKWFKFAGLLLLRDEQGQPRATAAADIDTLTAADALLHQAEQFYRQVGVGTMRRN
                     IAARIRALQKE"
     CDS             14659..15111
                     /codon_start=1
                     /product="phage head completion protein (GPL)"
                     /label=phage head completion protein
                     /db_xref="SEED:fig|6666666.357183.peg.20"
                     /translation="MFSGTPVDYQDEQLANNGFWPDLNVRDFQSQRTIPADLAADTVAQ
                     ALLAAVGEVNADLAEVEARSRAKGFARAQDVPGVSLKGQNVLCAQYQKAVFARAKADLL
                     GEFATIGRRESHPGQEGEDTRKGLLGEAAMVIRRMKGLKRATVRMV"
     CDS             15108..15605
                     /codon_start=1
                     /product="hypothetical protein"
                     /label=hypothetical protein
                     /db_xref="SEED:fig|6666666.357183.peg.21"
                     /translation="MSKLDDLTTFVSTHLPPRVMQGFDSFMDEVSFIPARRDLGEDQYQ
                     LAVMKFDAVLSWERWPYRVCDPRNLCALLLVWQEGQDDVPYMDAGLDMELPTLDVDVRD
                     QDSAIVVVSLQLAESLAIVADDTGIIPFEGRRWRLTRPEIWQATSGHLFGAGGDGAEVG
                     AS"
     CDS             15602..16306
                     /codon_start=1
                     /product="Phage protein"
                     /label=Phage protein
                     /db_xref="SEED:fig|6666666.357183.peg.22"
                     /translation="MIVHGELSQSQLAELRTALQRLTLPPKKRQRLLWRLAKYGVIAAA
                     KRNVRAQQAPDGSAWAARRGHRRGRMLRNLPNLLHIREMPEIQAVRIYLQGGGYRNGKT
                     PVPAGVVGYSQQNGMSVSVKRSQVGNGRPEPGRMATRRQARKLRALGYRIKRGARWRKP
                     PYREIEETLSFAQAGLLIRKLSGKAAKTAWTVDVPARPFLGMNDAEFTKALARQLQGIG
                     FGWDVKAQDIKG"
     CDS             16309..17424
                     /codon_start=1
                     /product="Conserved hypothetical phage protein"
                     /label=Conserved hypothetical phage protein
                     /db_xref="SEED:fig|6666666.357183.peg.23"
                     /translation="MSWPTVQVNQVNQLQGETSEIERVVLFIGEGAVDAVKTVPVNTQS
                     DLDQVLGAADSVLKRDVNAAMVNAGQNWSAFVCLLPPKGDWVSAVTAAQLVASVEGVVV
                     SLPATKGIIAQASSLRSTLVSAFGRWVWFLLAVDGPKAGEGWDKYLQSLSNLQNGAAAP
                     AVQLVPRLWGNEPGVLAGRLCNRAVTIADSPARVQTGALLAMGRTDLPVDGTGVTLDLA
                     MLQALEKQRYSVPMWYPDYDGYYWSDGRTLDVEGGDYQAIENLRVVDKVARRIRLQAIA
                     KIADRSLNSTPGSIAAHQGYFAKTLREMSRSTQINGITFPGEVKPPKDGDVVIAWRSKT
                     AVEIYLIVRTYECPKGITVSLVLDMSLEGSA"
     CDS             17421..17876
                     /codon_start=1
                     /product="hypothetical protein"
                     /label=hypothetical protein
                     /db_xref="SEED:fig|6666666.357183.peg.24"
                     /translation="MTKRISGQSFDFNMDGALVHAEKVSLSITDNTAAAQTQGIPDGWV
                     AGDVAAEGEMELSTKSLAVVTAKASSAGSWRGIEPVDLMWYAKAGSEEMKVEAFGCKLI
                     LSDILDVDPKGGSVMSHKIKFVVTSPDFVRINGIPYLESELTEKLIG"
     CDS             17885..18190
                     /codon_start=1
                     /product="Phage holin # possibly family II"
                     /label=Phage holin # possibly family II
                     /db_xref="SEED:fig|6666666.357183.peg.25"
                     /translation="MQEYEKNALGLLVLGALIALGKLLASDEKITPRLFFGRMILGSAT
                     SMAAGAALLWVPGLPPMAVTGLGAALGVAGHQAVEIWLRRRGSGLLKGSDAKDDVK"
     CDS             18177..18518
                     /codon_start=1
                     /product="Phage protein"
                     /label=Phage protein
                     /db_xref="SEED:fig|6666666.357183.peg.26"
                     /translation="MTLSEKQQLFTQLVAQLIQWAGERGYRLTFGEAYRTPEQAKLNAR
                     NGSGIANSLHTQRLAVDLNLFINGEYQTRTEAYLPLGEYWESLGGCWGGRFTSRPDGNH
                     FSLEHNGVR"
     CDS             18518..18874
                     /codon_start=1
                     /product="hypothetical protein"
                     /label=hypothetical protein
                     /db_xref="SEED:fig|6666666.357183.peg.27"
                     /translation="MDGLWRVVAGLAVAFAAGWQAASWQRDSMELAVTRAATAAVEQSR
                     QALQALASQSGAALETKLEALRNVPNKTVYREIVKPVFTNVCLSAEFVSLYNDTVNHTE
                     RVLSGKPEKEMPGH"
     CDS             18831..19010
                     /codon_start=1
                     /product="hypothetical protein"
                     /label=hypothetical protein
                     /db_xref="SEED:fig|6666666.357183.peg.28"
                     /translation="MSYQENLKKKCPVTNLPRLSGTTGNDAAQPLISWPQIYADCAARH
                     NQLIDEITQRENMQ"
     CDS             19007..19264
                     /codon_start=1
                     /product="Phage protein"
                     /label=Phage protein
                     /db_xref="SEED:fig|6666666.357183.peg.29"
                     /translation="MSKITLSVSGKELSFEPNTVAYNGMINDMAMDNKVAPAVTYLRRI
                     VVAKDKETLDELLKLPGAALQITEAVNAQYAPKLEIEVKN"
     CDS             19452..21416
                     /codon_start=1
                     /product="Phage-related tail protein"
                     /label=Phage-related tail protein
                     /db_xref="SEED:fig|6666666.357183.peg.30"
                     /translation="MKQLDFTLSLIDKLTRPIKQAQAAVTGFAKSSRDAFSSAAVGGAG
                     LIGTAMSIQGALGPAVEMHDAMVEASARGVDDSALQKINANALKFSTQYGRSALEYVQS
                     TARINAAVGTLTKEDLPGVVRASNVMAAALKATADESSEFMGQMFANFRSDAESMGNVQ
                     FAEQLASKAAYMRNAFGVELGAIKDLMEGARGVGTNYGIGMDEQLAVMGELQRTLGTEA
                     SSAYEGFLSGAVKGAKKLGLSFEDANGKLLTLPAMLEKLRGKYGASIEGNLKAQSDLDD
                     AFGDSAAVIKQLYGNVGILQRHITELGSSDGMKRATEMAQKMASPWERLTAIWYAIRAA
                     MGATLLPVLYPLINKMADGGQVLVRWLNLFPNITRVIGYCVLAVMSLAAAGALVNIVLG
                     VGRFVLMGLRGLWAGLTAIIRIHIAAIWLYNKAVLSWAATMRILRGVLLAVRMASLLTG
                     MAFNIALWPVLLIIGAVALLVAGCYLLIRHWDDIKNAITQTDMWKTVAEKVQWVAEIFS
                     QTWKAIIDGWSRVVNAMGSFSLSETMGKMADGVGEIFSGLWDSVLASFNTSYRWIIGKL
                     NAIPGINIAMPESTPRPGGEGLLTGGKIKGIDSGGLQRDISNSNAKNYTDNSRKVENLT
                     IYANKGFTPEQLTEWEALR"
     CDS             21398..21745
                     /codon_start=1
                     /product="Phage protein"
                     /label=Phage protein
                     /db_xref="SEED:fig|6666666.357183.peg.31"
                     /translation="MGSTAVMDDVKYIDLLITERDFSLNAGREPIFCNNRISIGQDCIH
                     AIIESGLTTKLVAERSPTLRADVLTQMIILVEDDERIIPGTVVVSEESPTRLWVTAETY
                     DFGPITARVDV"
     CDS             21742..22926
                     /codon_start=1
                     /product="Putative bacteriophage protein"
                     /label=Putative bacteriophage protein
                     /db_xref="SEED:fig|6666666.357183.peg.32"
                     /translation="MTEKPKIDYEQALKEAGMPVTAETVTEQFQAQVTASGLITNTSRM
                     SPFWRLISVMVTTPVIWLKDVLISVVLANMYLATASGSFLNLFAWGVNLSRKAATAASG
                     VIRFYKSDAAQAVVIPAGTLIQTERINGTIFSVAVSADTVINAGQASADVPVTATAEGG
                     AFNLAPGYYRILPVGVAGIERVENQENWLLTPGADEESDDDLRERCRNQFNLVGNYHTD
                     AVYRSMIAAVAGLSIDRIFFQHDAPRGPGTANAYLLLDSGVVSQPFIDAVNDYITAQGH
                     HGHGDDLRCMALPETQHDLTVTVYVRNLVNVSDEALTALRTGCQDLVRCAFRENTGYDV
                     EKTWPWSRFSFSTLAQELHDVFPLIASLDFSLGDIVSGLAVPRLASLTVVIDDA"
     CDS             22919..23551
                     /codon_start=1
                     /product="Phage protein"
                     /label=Phage protein
                     /db_xref="SEED:fig|6666666.357183.peg.33"
                     /translation="MPDFKEQLSGLRLPSWMDKGEPAALLNASKAYWLQVNDWLRWPLQ
                     QLDVDTCAEPLLNVLAYQRDISRLKGEALDLFRRRVKYAFVNAQDAGSVAGFIAIFERL
                     GIGTVTLTERQPGYDWDVILVRINDEQLSSYNALMMSLVRQYGRTCRRYTFDLWNGETQ
                     SVRCGAFAHNEEYHCATSAMPVGMVKGAVAVCHARMSASTEYYSANV"
     CDS             23560..25164
                     /codon_start=1
                     /product="alternative bacteriophage tail fiber C-terminus"
                     /label=alternative bacteriophage tail fiber C-terminus
                     /db_xref="SEED:fig|6666666.357183.peg.34"
                     /translation="MAQSVITHAFETWNVQRVLDGVAARPDKVVFALVPGQDESVPVDR
                     NEGSPPAEQIQHTAAITQAGVLNENAVVYSVVLDTTVGDWDYNWIGLLDSQTNTVLMIV
                     HVRTQQKLATRNGQQGNSLTRNLMMQFDGAAAATQINVTADTWQIDFSARLNGMDEELR
                     LSHIDVYGRAAFINDAFLVVKSNGQYQASSGVGYLGGLRVALEQPFDIVVDKLPTTIVL
                     DVCRKGEVTGRWETVFSLSQGNGFGGVVEYLDDVGIRHYRKSIANIDSAGWVHDLRIKG
                     TLSQQKAIVDFLRKDNNLAALSDKEASRKNLGLGALATMDVDTARQALHIDQIDNDRVV
                     RAGGGNGMADGHQISLGWTGSGLRVQVDATSFDLWHKDNVFPIHAAEIVGIPLPYPGAT
                     APDGWLKCNGQSFNKAAFPLLAQRYPSGFLPDLRGEFIRGWDDSRGVDPGRGLLSFQES
                     QNLTHSHGVNDPGHSHPYNKYEGSVGSGLAGFDYDQDAWNATVYTGHVGTGISIAASGG
                     HEARPRNIAFNYIVRAA"
     CDS             25164..25784
                     /codon_start=1
                     /product="Phage tail fiber assembly protein"
                     /label=Phage tail fiber assembly protein
                     /db_xref="SEED:fig|6666666.357183.peg.35"
                     /translation="MANYSVNVKETTLDNDGHAMTSGWITVFHVDAKTREYRGASYEYL
                     MAGVGIPANSYSDAPELPPEGKALCRAADGLSWEHVPDYRGKAAYDTQTRLSTEITEPG
                     QLPETLTLLAPVSEFDVWNGKKWVTDKDAQHQADVNSATQELNERFSTANTRIQALSDA
                     VDMELATEEEKTLLGKWKEYRVLLNRVDVNSAPDIDWPEAPAV"
     CDS             25781..26506
                     /codon_start=1
                     /product="hypothetical protein"
                     /label=hypothetical protein
                     /db_xref="SEED:fig|6666666.357183.peg.36"
                     /translation="MTWQRADICLSSALPPVTCSVLPVHPWVYGVGNVTDNGHYLSPAN
                     AVAYMAERLGAAADNLAVCVWMVCGSGLGEFLHALDALTVVFPAPALSQVARQARAMAE
                     LATVKMQIPAKSRTLPAAAPLSVASCRQALNAQRMAVAQQQAAVPMGLNALKGMAERFT
                     SQREAALSEISQAMQQMAQRSALAWVFTGQGAPGVIAAEMLKNIPQPSAIYTAAMMFTG
                     TELEALESMIREPDNYARP"
     CDS             26478..26999
                     /codon_start=1
                     /product="Phage protein"
                     /label=Phage protein
                     /db_xref="SEED:fig|6666666.357183.peg.37"
                     /translation="MSQIITLALDGEAIPLRGLTVTPSMQFEEKDQSGQTSSTANAEQG
                     IKPKELRVSGVIPFTEAKVLTRLFALAEAKEGDKLKRYRVANPTAQAINFRLATFTGSI
                     DAPKQDGKQAWLVTFTLREHISVSEKRDARAGNQTETKKTPGQGSDGENDEQLSWFERK
                     VLKPVNDALG"
     CDS             27003..28655
                     /codon_start=1
                     /product="Hypothetical bacteriophage protein"
                     /label=Hypothetical bacteriophage protein
                     /db_xref="SEED:fig|6666666.357183.peg.38"
                     /translation="MRPITRLMLSGDAVHVVDVNVVLELNACGRGFITAETEQDYTGKL
                     VRLDVGYTDLVLRWFTGYVERSQPAENGYQRLFVRELAGVFDRMWPCAFQHPTLRQLAD
                     WLSEHSGLTVHLPDAGYVSQPIPHFTHSGSGHQLLANIGAAFGIDDYVWQPLPDGALYL
                     GSWADSLLAGAPVSIPAEFSQAQAAGNSMTLPLIQSVRPGAVVNQQRLSRVQLLNENMT
                     IEWVPVSTVTGKAAQRTPAQRQIDTAYPELSAGLHLPKFARVEAPSEDVSSGNIADPFR
                     PRYAVDLQLLDADGKPAKDTPVYSAVPLPVPMAGSEAGLFQFPPPGSLVEVGFTGGRPD
                     KPFVRQTVASGQSLPDIKPGEQLQQQRAEVSQRVTVSGDWERKTDQAIRESSMHREVSA
                     DEERRTLVTRETLIKATDNATVLGTHTLQAGAIVQIAQGDYSLATQAGYMASVGQSATV
                     EIGQSLTEKIGQLRRSIAGARQELMAPVVWVGSQQVNVMTLMLDTLDVIQELATQTASH
                     THPNTGTPLNAGEIQQTGRRTGTLKDKYSPIIG"
     CDS             28820..29179
                     /codon_start=1
                     /product="hypothetical protein"
                     /label=hypothetical protein
                     /db_xref="SEED:fig|6666666.357183.peg.39"
                     /translation="MNAHATKSALHRTRLRFLDHKDFSVLFFYKTQRQPAPPLGFCGRM
                     TTENSERNFSVFQFFGSGKDRFEITTVRNKRILCGFGQFEWISECEQALSVGHSICSNH
                     AGLGVMRLLAGTEKR"
     CDS             complement(29205..29711)
                     /codon_start=1
                     /product="hypothetical protein"
                     /label=hypothetical protein
                     /db_xref="SEED:fig|6666666.357183.peg.40"
                     /translation="MALTKCKECKKEVSTSAKVCPHCGVKNPGTTAGQAIGGFVVLVLL
                     VWGAIKIFGGSDDNKPAAKADTPKNCAANDGQCLFDKNWIEAASRCRPLIEKSSKYDFE
                     WTDGMMTPMFSHFRLNEAKKQMTFIGDKVKFTNGFNAKITMTYNCTYDLQGKSIVDFGI
                     TEGKL"
ORIGIN
        1 tggtggagct ggggggagtt gaacccccgt ccgaaattcc tacattcctt atggtaggta
       61 gtaaaaacaa taaattacaa taaaaacaaa atgttatttt gtggtgagtg gtgaggaaaa
      121 ggcttgattg ccattcgctg ccgccaacct gccgccattt tttggcgacc agttcaggcc
      181 gttgagtggg tttttagtga tggcgtcttc cagatggtcg ggcgcaaagt gggcgtagat
      241 catggtcatt ttgatgtcag catggccgag gatatcacgc agcaccagta tattgccgcc
      301 gttcatcatg aaatggctgg cgaaggtgtg gcgcagtacg tgggtacatt gcccgtcagg
      361 aagctgaatt cccgtccggt taatggcgcg ctcaaaggct ttacgacagg gagaaaacag
      421 cttcccgctt ttacgtggga tctcatcata cagttcgcgg ctgatgggaa cggttcggtt
      481 tttcttgccc ttggtgcggg tgtaggtgat gcgataaggc gtgacttgct ggccggatag
      541 cccttccgct tcgctccagc gcgcgcccgt tgccagacat atttttgtga ctagcaacag
      601 atgtgggtta gcagattcgg cgcacgcatc caaaacgcgt tttatctcat tgggggccag
      661 aaacgccagt tcctgttgcg ctatcttgaa tgttggcaag ccggataacg ggttgggggc
      721 atcccagtgg cctagttttt tcaatgtgcc gaagacggcg gataagttgc gctgttccag
      781 attgacagtg cgtggtttga cgacagccaa agggatgcca cttgcgtcag tcatctgccc
      841 ggctaaccgc agttcgcggt aatgcgcgaa atcggcggcg ctcagttctc tggctttggg
      901 gttgcccaac ccggtgcaga tgatatcaag tttcgccatc atcctttttg ggtcggccag
      961 tgtgcggccg taaagagaaa accacagatc gataatctcc ctcaggctgc ggttatccgc
     1021 tttttcacca agccagggct tgttttcaat ctcttccatc gtgaagcgct caaatgccaa
     1081 cgcctcacct ttggtggcaa actgcttgcg tacccgcttg ccttcacgcc ctaatgggta
     1141 gcactcacac aaccatttcc ctgatgccaa tttacgaaca gccatatacc ccccttgtaa
     1201 actgaggatg catacttact gtgtataaaa acagtcatca atgtatggat gttgtgagag
     1261 caaacaaatg gctgaaggtt gttgaggcta tctatgagat atttcatgat atctaactat
     1321 tattagactg gcgttctctt tcttcttttt gatttttttc atattcccat cttacagacg
     1381 tcatcactat tgcataaaca ttgtaaatga aagttttaat agctagtacc aaataaacaa
     1441 ggctagttcc aatgacgaca taagatgttt ttatcccata tggttttatg atttcagagt
     1501 aaggcatggc tcttataata ttagcaagga acccatttgt ttgaccgagt agtattatga
     1561 aaagataaat taaagtacaa gctataaatg atatgaaaac tttcataaat gccatgaagt
     1621 tatacttcag ggttgggatt ttagcttctt tattttcgtg tagcatcatt gctatcatca
     1681 tatctggttt tgatagtgtc gcgaaaatgg tgaagccagc aattaggaaa cctagtgttg
     1741 taatcgtaaa gttaaatcca aaattagacc atcccctgat gtctaaaagt aactgatctg
     1801 ttttttttgc aagaagaaaa gagtttataa ttaataacat tgccgtggaa ataattatga
     1861 ctatatgaag cttgctcatt gtgattttcc tagcaagcaa agccacttgc caaagatttt
     1921 tttctttggt tatttcactt ccggctatgt tatatttcat ttatttgaat ctctcaaata
     1981 ttttcttaat tttccctaat gtacccttct cagtaatttt tggtaatctt atcctttcgt
     2041 ctgcgactaa atctttaaaa acactatagc attcttgtga tgcctcattt atgtcttttg
     2101 aaagatcttt tacatcacag gtaagactaa aatcctcatt actgcccttc attatatcac
     2161 cagcatcatc gaaacctctc attctaaatt gtgagtttgc gagacttgtc gaggctttta
     2221 gttgtgataa cacagcattg tgacgtaacc cgtcctcagg gttagtaaat aatacgcttg
     2281 cttgcctgct attcatgttt tcgcttcgtt ctccaaactc ttgccagaaa aaatcatcat
     2341 tatctatttc ttctttattg gttggtaata attttattga tactctgttt attttattga
     2401 aaaggttgat gaaatcttca aggctttttt tgtctgttaa tgttgttatt cttaattttg
     2461 gtgaaggtac ctcttctctc aatgattttt ttgtaactct aggtagccta tattctaaac
     2521 catcacgaaa ctctttttct tgcttgtaag tttcatcaat ataatcattc catctatgag
     2581 ttaagcagta ctgacttgtg ctgcgaaaat tttctataga tggagcgccg gacacctctt
     2641 tacataatat taatctgtgt gtgtttaata ttaataggaa tatagagctt ggagcggttt
     2701 ctaattcgtc atagtcttcg attatttccg aacctgatat tatttgatct cttgataaaa
     2761 ccgtgttttt tactattctt ccttgtattc caaggactgg atgttcttca gaatcatcta
     2821 gaacgaccat ttctgtatta atgaaaaaat aatcagattt atcttttatt gaacggatgt
     2881 aattcatctc gaaaaacgat ggcattacta tttcatctag caagtccatc aatactaaat
     2941 cattcccgaa ttttagtgta taatttccaa attcaagttt ttttataaac tccattataa
     3001 aactccaaaa ataattataa tctagctatg atggggataa tgtataaaga aaaatggctt
     3061 tgtttaactg tttgttaatt gaaacattac tgtgtatagc ttgccaaact atcgctcaga
     3121 ggtgttattc tccttgagat tgctataaat aataatttcc tattaaaaac cattcataaa
     3181 tagaaattaa ccgatcgatt gccgattttc cactaaaatt attaactggg gctgaaattt
     3241 tatcattttt catgcgctta ttgttagttt gataattttt gcaatgaaaa taatatctga
     3301 aataaagcaa tcaaaatcta cagagccgcc gatcactcgt attttctcga cgggaattct
     3361 ggccagatct ctgatgctag tctggccttc aatttcaacc agccacttac catcaaccac
     3421 ttcatcaaac tggcgatcgg caatgtaggt tatgtctcca tccagaatga caaccgggtc
     3481 tttcagtcca tcggatagaa aagccttatc aaacatatag tagtttgaat cgtagagttt
     3541 tccatcgatc agcttttgcc ttggtatagc gatcacatca tttctggcgt catcaaactt
     3601 tgggccttca cctgtagcga gccagcgtaa agatacgccg gtttctaaag ccgcctgaat
     3661 gacccaatca gcaggaaaag agtcacgcat gtatctgtta gctaaagtgc tttttgatac
     3721 accgagatgg tcacatagag cctgacgatt cttaaaacca tacgcctcaa caagacgctc
     3781 aatcgctgcc tttgcaccag tcccaaaatt cataaagttc accaaatgta tacttttagt
     3841 ttgactaaca ctaaaagtga tcgtaaattt cgtgtgtaca caaaaagtgg actaatcaca
     3901 gttcacaacg gctcaccaca agccaatagg gaatgttgca ttatgagacc tcaaatatca
     3961 atcaccctgg ccgtgccgtc tgtctcgatt gagaaataca gcgagctgac cggcctttct
     4021 atcgacacca tcaacgacat gctggctgat ggccgcttaa ctcgtcaccg cctgcgcaaa
     4081 gataaaaagc gtgaaaaggt gatgatcaac atcgccgcta tgacggttga tgcgctcgca
     4141 gattgtgata tttcgctcaa ttagtttgat attgagattt ttggagttca caaaccatgt
     4201 ttgattacca gatcgctaaa cagatgcact ttgatgaagc ctgtcgtgcc ttttcacttc
     4261 gccacaatct ggcggagctg gcgcgcatgg cggggatgaa tcagcaaatc ctgcgtaaca
     4321 agctgaattc agaccagccc cacaagctga cctgtgaaga attgctgacg ctgaccgaca
     4381 tcaccgagga tgccacgctg atcgatgggc ttttggcgca actgaactgt ctgccagcgg
     4441 tgccagtaaa tgaggccaga gcagaacggc ttaccgccta tgtgctgcaa gccactgccg
     4501 cagtagggaa ggtagccgcc gaaagcatat cggatgagcg tatgacgcag acgcgacgcc
     4561 atagcctaat gagtaccatc agcgacgggg tgcgttacct gtcgctgatt ggcctgacgg
     4621 tgcagtcgcg cattcaggct aacccggcaa tggcgtcaac gctggatgct ctgagcgggt
     4681 taggcgcatc gctgacaatc ggataataac aacaccaggg aaaccacgcg ccgggcgtgg
     4741 tgaaacatcc cggcacctat ttgcaaccgt ctatctgtgg gcggttacca ataggagcaa
     4801 caatgcaaaa gccgatctca attacccctt tcctgagaaa taaccaggcc ggggcatcgc
     4861 ttcccgtaga ggtgcgtcat ggcaaaggca agcagggcat tattattcgg ccagatggcc
     4921 gccgatggag tccaccgaaa ggggcgttta accggtaatc aggagggaat atgtctcaat
     4981 ctgtcgatca tcagaaatgg atacagcgtt gccgggatat cgtgtttaaa ggtgaatccc
     5041 gcgctcagtc attttgggaa cgtgctgcac tggatacccg tgaaattatc ctgttttctg
     5101 caaaaccaaa gctgaaatcg cgccatgtta attactcatg gcatcagttt acggcggaag
     5161 aacgtgccgc tatttggggg gcaattaagc gcatccggtc tatttgcgat gaaaccgcgc
     5221 tatttggccc ggatgatttt ttgaaaaccc gtaatcaaaa cggcgcaagc aatacgccga
     5281 acccgtcacc cattcattaa ttaatccata gcaacgaata aatgcccttt atcgggcagg
     5341 gattcgtatt acctgaaaaa aggaaaccgt aatgattgca accaaattaa ggcccatgaa
     5401 tgccgccgct gatggcgcac tgatcgaact gctgaataaa gcccgccggg aggagcgcaa
     5461 agagcagcat ttttccttct cactgcgcct tgctgcgctg gctgtccgtg ctcaacaacg
     5521 tgacctctcc gccgccgaag tggtggaact gatccgccag gaatcggaac gttttgagca
     5581 ttccgctcag gagcttatct aatggatatg ccacaaaacc ccgcttataa ccgtgtggat
     5641 atcaatgggc gttatgcgat tgcgaaagtg ggttatgact ttgcgctggg ggaagtgcaa
     5701 tgcgataacc gggacggcgc acagccttat ctgtccaccc tcgcggtata ccaaacgccg
     5761 attacgctgg tgaatgattt tgtacatcgg tcgctctgcg ctgaaattcg gcgcggaacg
     5821 gttactgaca tcaccaccat gctgaccgaa gcagagcgcc tttccctgct gtgcctgaat
     5881 gcctttgaac agttagaaaa tactggaacc gggttaagtg aatgaacccg gaacacaatg
     5941 gcgcttatca cgtcgtcaat cagtggcgac gtgagcagtt cacccgcaac gaaccggacg
     6001 gcttaaccta tgttgagcgt agtctatggc accttaaccc gctggatcac cagtggcgtc
     6061 agcagtatct ggccggaatg ccggactatc tggcgaagta tttcggccag cgttatgaaa
     6121 cgctgtttac atccgatgag cacaagggcc gccgccgggc caatacgttt ttactccgta
     6181 ccctggggaa aagcgtattg ccacgcctgc gcaccgttac cgaacgatac cagacgcaac
     6241 agcgtgcggc gggagatctg ccgttcccgt tcggtgatga tctggaaaag ctgccggttt
     6301 atgaccgtga caacatccgt gccctgtcac agcaggtggc cgactttatg gctgcatcgt
     6361 tgcgcgacta caccgaaaac cgcatcagga acactgggga actaacagac aggtacatca
     6421 ccttgctgtc attccgtcac cttggtctgc tgaccttaca ggcaggaatt cagccgccgt
     6481 actgggcgca attcaccaaa ggccgccacc cgttatccac tgaaaaagct gaatccggct
     6541 tgttacgcat gatgtcgcct gaatggtggc gggcgcgatt aaaacgccgc cgtgatatcc
     6601 agcgggagca tatggctatc gcggtcggcc aggtgcaaaa ggcggcgtcg ccgtatgttt
     6661 cccgatctac cctggatgaa tggaaagagc agaaacggcg taaccgggag tttttcaaag
     6721 cgtttgaact ggaagatgaa gagggaaacc gcgtctctct ggacgacaaa gttaacgcca
     6781 gcaacgctaa cccggcgatc cgccgctgtg agctgatggt gagaatgcgc ggctttgagg
     6841 atttggcgca ggaaatgggc tgcgccggag agttttacac tattaccgcg ccgtcacggt
     6901 atcacgcagt acacagcggt ggtgggttcg ttgaacagtg gagcggggca agtccacgtg
     6961 acacacagaa atacctgtgc ggcgtgtggg cgcgtatccg ggcggaactg tcacgcgaag
     7021 agattagcgt gtttggtttc cgggtcgtcg aaccacatca tgacggcaca ccgcactggc
     7081 atttgttgtt attcatgcgc ccggagcaca tcgagcaggt gcgtgacatt atggcttatc
     7141 acgcccgccg ggaagatgcc gatgagctga acagcgaaaa ggcgcaaaaa gcccgcttcc
     7201 actatgaacc gattgacccg gaaaaaggca gtgctacggg ttatattgcc aagtacatca
     7261 gcaagaatat cgatggttac gcactggatg gcgaggccga cgaggaaacc ggggaaaacc
     7321 tgcgcgacat ggcaaaggcg gtatcggctt gggcatcgcg ctggcgtatc cggcagtttc
     7381 agcaaatcgg cggcgcgccg gtgacggttt accgcgagtt gcgtcgcctg ggtgataagc
     7441 aactggataa cgcggcgatg gatgcggtac tggcggcggc agatgtaggc gactgggcgg
     7501 catacacaca ggcgcagggc gggccgttag tctcgcgtga tgcgttggtg gtgcgcctgt
     7561 cctatgaagt gaccgagcgt gccaatcaat acgccgaaga cgtgcaaaag gttcaggggg
     7621 tgtactcgcc attattggga tcgcactccg cgatcatcac ccgaacggtg caatggaaga
     7681 ttgttccgaa acaggccgcc gcgttagcgg gggccggggt ttctggcggc tctgccgccg
     7741 cttggagttc tgtcaataac tgtacgccgg gccttcggcg acgattatcg gaactgttgc
     7801 gcttaagagg ttttccacct gatccggggt tggttgatgt gctcatacgg ggcggcaatc
     7861 tggccatgag tgagggcagg gcgctgaaaa tggtcaatgg caggctggaa gaagtgcgcc
     7921 atacgggaga ctgcgaactg tgggagggtt ggaactgggg taaataaaag gccgttggtt
     7981 tacacggcct tttatatgca atgtctttat tttgagaaat tattgaatac agaagagcta
     8041 ttttccaata aatactcact tgccttgtta gcaatggcat atgcacttgt tgctgtaatg
     8101 actacagcac ctatagaaac agcatatgca ataatctttt cagctgcttc gttatctgca
     8161 cattccactt tgaacccgtt ttcaccaccg atagtaaagt tgatcatagg catccttgga
     8221 tattttttaa acggctttga tatttttaca ctagggatgg gacgaaatca ctgtttttgg
     8281 cagaatattt gcgctgccca acagtttaga cagtttcttg atgtcattaa atcacctgaa
     8341 aactgccaag gaataataag atggggggaa cagctaacaa ggctccatgt ccgttggtgg
     8401 atgaaaaaca cggaaccgct aatagtttgt tagcttcgta tttatatttt gaaatgtttt
     8461 gttacgtgag cgctattagt tgtaggagat gaccaatgga tagggagttt gagcagtcac
     8521 tgattgttga gcggattgcc tttctggcca aaaatgccgg gatggacggt aatgacgaac
     8581 gagacatgca aattgcgctg atctggattg ctgaactggc ggggcaattg atgacgttac
     8641 aagccgcgta atgcggctta ggcggcagcg gttctcagca ggtctaatgc catttgtcgc
     8701 tgttcgggtt ttaggttatt caacaccgtt tgcagcaact gatcgccggt tttggcgctg
     8761 gggctgagtg tgtgggaaaa ggtcagattc atcacaaagg tgtagccgca ttccacatct
     8821 gaacaggcac agtaaatgtc tgcaatctgt cggtgtttgc ggttcgtttt gcggataacg
     8881 gcttttgagc cgcactccgg gcattcaatt tttaataccc gcatattcca tgctccggcc
     8941 tctaaaacat ggttaaattt taacgtttta tgccccatta cgcaccctga atcgttgtat
     9001 catcggcaaa atcaaaaatt aaatgcagat tttgcggtat ttcggggtct ttattgatgg
     9061 aagccataaa acggcgctga atggggatca cctcgtcttt gcggtacgtg ttccgcgcct
     9121 tttccgggtc gcccagcccg gcggcgtttt gcgggatgat gccgcacagc ccagccggga
     9181 aacggtgtgc attgagtaca tcctgggcgc tgatgttttt cacgttggcg aattcgtcct
     9241 tggcgctgat atcccccatt tgaataaatt gcaccccctc tttgtcgccg ttcgggatgt
     9301 ttaccaggat ggtggagaaa ttgccgatcc ctttgctgct ggctaactgg cgttcaattt
     9361 cttcctcgat ctcgtcggtc atattcgggt cgctggtgta gaggataccg ccggtgtgtg
     9421 cgccgttgtg gtagtagcgg cggcgaaaaa tcaccgcctc actgttcagc agggccgagt
     9481 gaataccgcc gatgtaatcc ggcaggccgt agatctgctg ttgcgggtcg tacatcttga
     9541 tgaaaatcac gtcttccggt gggtaaacca gcggttcccc tttctgcaat accacaaatt
     9601 ccccggtttt gcggatgcgg gtatacagcg cgggtagcgg cgtcagggcg atcacctctc
     9661 cccagccatt gcgcactttt aaaatggcga tatcaccaaa ggtcaggtag tcgaacgcgg
     9721 cggccaacat gtcatcgtga gacaggccac ccccctgata atccgatgcc accatgttac
     9781 ggcgggcata gaggatgccg ccgtgctggc cgttcaggtt gaccagttga gccagggcga
     9841 gccggtctat cggcagggtg tagtgattaa attcattgtc ataccacaca tcgcggtaat
     9901 cggtgccggt ggttaatacc ggttccggct tgccgaaagt gataatactc atctttttac
     9961 gcggggcgtt ttgtgccttc tggcggcggt gtgatgtcct tttcatgctg cttttttcag
    10021 tctccatcgg gattggggtt tgttctcata gttcagcggc tcgttatcca gcgcgtgtgc
    10081 gatagcgaag aaggcttcgg catggccggt ttccgcgctg cggtcggcga tgaacgtcat
    10141 ggcgttgccg ctggccgtgg tggtgcgccg tatcgccata aatgatgccg ggatagcctt
    10201 ttcatcctga tcccactcaa tgcgctgact ttccaccacg tcagccgctt tcatcaccag
    10261 ccggtttttg gtttccacgc cgtagcggat agccgttgcc tgcctcatgg caaagtgctg
    10321 gatgttctca aacaccccgg caccgatgcc ggtcacatca atgccgatat aggtaaagtg
    10381 gtaacgctgg aacagctttt tgatttggtt ggcctgataa cggaagttca tgccgtgcca
    10441 gttgacgacc agcaacacac ggaatttctc gccctcgtaa ataggcgggg cgacaatcac
    10501 aaacgtggac aggtcgccgg agcgggctgg gtcgtagccg ccccagacct cgcggttgcc
    10561 gaatggacgc ggcgcggtcg ggtcgtgatc ctgccaggtg gccgggtcta cgccgcagcg
    10621 ctccaggtcg tcaaagctga atacggcgtc tttgttgtcc acaaacacgc acatatacag
    10681 catgttgaac gtgtccacgt tgtagcggtt gcgcagtttt tccaggctgg ccagattgaa
    10741 gccaccgcgg atcgcgtctt ccatcgtgat aacgtaccgc cactgaccat ccgggcagag
    10801 ccgtccgccg tcgcgcagtt cgtcaaagcc ggggaagtta accccggcgc gtttcttgtt
    10861 gccgcgcttc cactcttcgc ctgtccagaa cgggtaagcc tggtgcgttt tggcgctggg
    10921 ggtggaaaag taggtggtgc gccatttgtc atgggtggcc attgcgctgg ccacttcgtt
    10981 aaggtgggca aagttcggca cccaaaagta ttcatcgcag tacagatgcc cgctgtaaga
    11041 ttgcgcggtg ttcttgttgg tggataaaaa gcgcagttcg gccccgttgc tcaggcggat
    11101 cgggttgccg gtcagggtga tatcaaaata ctgctgcgca atgttgacga tgtacgagcg
    11161 gaaaacttct gcctgggcgc gacttgctga caggaagatt tgcggctcac cggtcagcac
    11221 cgcattttca aaggcttcaa aggcaaaata ccaggtggct ccaatctggc ggcttttcag
    11281 gatgttgcgc acctgcttgc cgagattcgc gcgcaggtgt ttttggtagc caaacaggtg
    11341 ttcatccgcc caggtgtcaa agtcttcttt ggtcaggctg gaaatgtcgt tttttcggta
    11401 ctggcgcttt ttggccgggc gttcatcgtc gtcattgcta cgtgaaccgg gcgtattgcc
    11461 gtgaccggca gccgcgagtt tttctttgtg cttgttgctt tgcgcccgca gtttgacggc
    11521 gtgggcgatc agcatgtcca tttcctgcaa ttccagttcg gtctttttat cccgaccggc
    11581 cagcaactga taacggcgct ctattgcctc ttcggtactt tcggcgctga gtaaatccgc
    11641 ccagccgaat ttttgcgccc aatagtaaat aatccgcgca ttgggcagat ttaaatcagc
    11701 ggcaatttct ttcggtgtgg ctctttttaa atagagcagc cgcgcaacac cgattaattc
    11761 atcagaatat ttagccatgc cggtattatg cggcgcgatt tttattttat gaccggtgtt
    11821 tatttcgctg tgttcgtcaa agcgtcgtta tccgaataga ggcgaataaa gccggtcgct
    11881 gcccgtttct tattccgtaa taatgccgtt atccgacagg aatggagtat gtcaatgtct
    11941 cagttaatga ctaactggat ttgtatcgcc acggaggggg aaacggtcga taagcgggta
    12001 atggaaagac agtggctcat tgatgccgct gaaacttatg acccgcaact ctatgcggcc
    12061 ctgatttggc cggagcatga agaatggttt ggcaatatgg gcgaagtgct ggcattaaaa
    12121 accgaaaccg gtgatgacgg gctgttgcgt ttattcgctc agttacgccc gaaccaccag
    12181 ttattacagg ctaaccggga gggtcagttg ctgttttgct cggtggagct aacgccagac
    12241 gggaattttc gtggcacagg gaaaacctat cttgaagggc tgggcgtgac caataccccg
    12301 gccagcgtgg gaaccacgcg gctacgtttc agtagcaaaa agcgcggccg tttattcggt
    12361 gcattaaagc cgctggttat tgatgaagta aaagaaatca aagggaatag catggcaagt
    12421 aaatcatggc atagcctgtt cggtattaag ccgaagacat tcgctgaggg tgaaggcgaa
    12481 aataacgatg caggtggtgg cgataaattg caggcactgg cggaagcgct ggccgaactg
    12541 gaatcccgcg taactgcgct ggaaagtcag caaagccaga ccaacgacgc cgtggaagcc
    12601 gtccaggacg atgtggatac ggtaaaagag gtggtggata ccgaagattt cgccacgctg
    12661 cgtaataacc tgccgaagat tttgaaaaat ttcggcaagc tggatcgctc tattactaaa
    12721 ttgccgcagc gtcaaattgg caataaaccc aaagggttta atttcctgta attccattta
    12781 ttgggtgata cctctttttt tatctcgata tcgagaggac gcattatgtt tttaaatcag
    12841 cgggcgcggg aatatctgag cgcctacagt gccggtctgg cgcaggaata tggggtagcg
    12901 gataccgccc gttatttcgc gctgaccgac ccgaaagaaa cccagcttcg cgctgccctg
    12961 ctggaacgcg tggatttcct gtccatgatt aacgttctgg atgtggatca actctccggg
    13021 caggtggtgt ctgtaggcag ttccgcgctg cataccggcc gtaaggaagg gggccgtttt
    13081 atccgtcagg tcggcgtgga tggcaatgac tataagctgg tcgagaccga ttcctgcgcg
    13141 gcactgccct gggatctgct gtcggtgtgg gctaacgccg gtggcgaaga cgagtttttc
    13201 caactggtac aggcgttttc gaatgaagcg tttgcgctgg atatgctgcg tatcggcttt
    13261 aacggtaaca gcgtggccaa aagtaccaac cccgacaaaa acccgaacgg cgaagacgtc
    13321 aacattggct ggcatcagcg tatgaaggat ttcaaagatg ggcaacaaat tatcactgac
    13381 cgggtggtac tggacgaaaa cggcgattac aaatcactgg atgcgatggc ctccgatttg
    13441 attaacgcca aaattcccca gcaataccgt aatgacccgc gtctggtggt gctggtcggg
    13501 gcggatttgg tcgctgccga acagtatcgc ctgttccaga aggccgaccg cccgaccgag
    13561 aagatcgccg cccagatgct ggacagcacc attgccgggc gtcctgcgat tgtgccgccg
    13621 tttatgccgg gcaaacgcat gaccgtcacc acgctgtcga acctgcatat ctatacccag
    13681 cgtaataccc ggcagcgtaa agccgagttc gttgaagacc gcaaacagtt tgaaaacaag
    13741 tatctgcgca atgaagggta cgccgtggaa tacccggaac tgtatgcctc ttttgatgaa
    13801 agcgccgtca ctgtcggtac cgtggccgag cctatggaaa aaccggccgg agcgtaaccg
    13861 atggccctgt cacctgcgca acgccataac gcccggatgg ttgccgagca gcagctatcc
    13921 cggtgccagg cggtatccgg cgatcacagt ctgcatgtgc aacgccgtgc gctggaaaac
    13981 gacgtggcac ggctgcgcag tcagcccacg ttacgcgaca gggtagagat gaaacgccgg
    14041 gagttgctgc cgcgctggct gccaacggta cagcgctatc tggacagcgg cgaggtgtat
    14101 caaaacccgg tgttcgcaca ttgcgtggtg tggctgtttg atgtggaaga gtttgatcag
    14161 gggctggcgt gggcagatat cgccattgca cagggacaga gcacccctga caacatccgg
    14221 cgcacgttcg cggcgtttgt tgcggatacg gtgctggcct gggcgcagca gacggcggac
    14281 atggggcaga gtgtggagcc gtatttttcc cgcacgttta agaacgtggc agaaaaatgg
    14341 cggctacatg aggagatcac cgccaaatgg ttcaagttcg ccgggctgtt actgctgcgt
    14401 gatgagcagg ggcaaccacg ggccaccgca gcggcggaca tcgacacact gacggcggcg
    14461 gatgccctgt tacatcaggc cgagcagttt taccgccagg ttggtgtggg cacgatgcgc
    14521 cgtaatattg ccgcccgcat tcgggcgctg caaaaggaat aaaagactac cgcaagccgg
    14581 gcgggcgcgg ctgaggcaat gcaccgggtg tgcgatgtgc cgtggaagcc ggtcagcccg
    14641 cctttttacg ggggatgcat gttcagtgga acaccggttg attatcagga tgaacaactg
    14701 gccaacaatg gattttggcc agacctgaac gtcagggatt ttcagtcaca gcgcaccatc
    14761 cccgccgatc tggctgccga taccgtcgca caggcgctac tggcggcggt gggcgaggtc
    14821 aacgctgatc tggctgaggt ggaggcccgc agccgggcga aggggtttgc gcgggcgcag
    14881 gatgtgccgg gtgtcagcct gaaaggccag aacgtgctgt gtgcgcagta tcaaaaagcg
    14941 gtgtttgcca gggcaaaagc cgatttgctg ggcgagtttg ccaccattgg ccgccgcgag
    15001 tctcatccgg gacaggaggg ggaggacaca cgcaagggat tgctggggga agcggcgatg
    15061 gtgatccgcc gcatgaaagg gctgaaacgg gcaacggtga ggatggtatg agcaagctgg
    15121 atgacctgac cacctttgtt tcgacgcatc tgccgccccg cgtgatgcag gggtttgaca
    15181 gcttcatgga tgaagtgagc tttattcccg cccgccgtga cctgggtgaa gaccagtatc
    15241 aactggcggt aatgaagttt gatgccgtgt tgagctggga gcgctggcca taccgggtgt
    15301 gtgacccgcg caacctgtgc gcgctgttac tggtctggca ggaagggcag gacgatgtgc
    15361 cgtacatgga tgccgggctg gatatggagt tgcccacact ggatgtggac gtgcgcgatc
    15421 aggacagcgc gattgtcgtg gtgtcgctgc aactggcgga atcactggcg attgtggctg
    15481 atgacaccgg gattatcccg tttgaagggc ggcgctggcg tctgactcgc ccggaaatct
    15541 ggcaggccac atccgggcat ctgttcggtg caggcggcga cggggcggag gttggggcgt
    15601 catgatcgtg cacggtgagc tgagccagtc acaactggcc gaactacgca ccgcattaca
    15661 acggctgacg ctgccaccca aaaaacgtca gcgtttactg tggcggctgg cgaaatacgg
    15721 ggtgattgcg gcggcaaaac ggaacgtccg ggcgcaacag gcaccggacg gcagcgcctg
    15781 ggcggcacga cgcggccacc gacgtggcag gatgctgcgc aatctgccca atctgttgca
    15841 tatccgcgaa atgccagaga tccaggcggt acggatttat ctacagggcg gcgggtatcg
    15901 caacgggaaa acgccggtac cggcgggcgt ggtgggctac agccagcaaa acggcatgag
    15961 cgtatccgtc aagcgttcac aggttggcaa tggacgccct gagccgggac ggatggccac
    16021 gcgacgacag gcccgcaaac tgcgggcgct ggggtaccgg ataaaacgcg gggcgcgatg
    16081 gagaaagccg ccttaccggg agattgagga aaccctgagc tttgcacagg cgggattact
    16141 catccgtaag ttgagcggca aggcggccaa aaccgcctgg acagtggatg ttcctgcccg
    16201 gccatttttg ggcatgaacg atgcggagtt tacaaaagcg ctggcacggc agctacaggg
    16261 tattggcttt ggctgggacg tgaaagcgca ggatatcaag gggtaagcat gagttggcca
    16321 acggttcagg ttaaccaggt aaaccagcta caaggcgaaa ccagcgagat tgagcgcgtg
    16381 gtgctcttta tcggtgaggg ggcggtcgat gcggtgaaaa ctgtgccggt gaatacccaa
    16441 agcgatctgg atcaggtgct gggggcggcg gattcggtac taaaacgcga cgtcaacgcc
    16501 gcgatggtca atgcggggca gaactggagc gcctttgttt gtctgctgcc gccaaagggc
    16561 gattgggtga gcgcggtcac ggccgcccaa ctggttgcca gtgtggaagg ggtcgtggtg
    16621 tccctgcctg ctaccaaagg tattatcgcc caggcatcca gcttgcgatc cactttggtg
    16681 tcagccttcg ggcgctgggt gtggtttctg ctggctgttg acgggccgaa agcgggtgag
    16741 ggctgggata agtatttaca gagcctgagt aatttacaga acggtgccgc ggctccggcg
    16801 gtgcaactgg tgccgaggct gtggggcaat gagccgggcg tgctggctgg acgcctgtgt
    16861 aaccgtgcag tgacgatcgc cgacagcccg gcgcgggttc aaaccggtgc cttgctggcg
    16921 atggggcgca cggatttacc ggtggacggt accggcgtga cattggatct ggcgatgttg
    16981 caggcactgg agaaacagcg atacagcgtg ccgatgtggt atcccgacta tgacggctac
    17041 tactggtcag atgggcgcac cctggacgtg gaagggggcg actatcaggc cattgaaaac
    17101 ctgcgcgtcg tggacaaggt ggcgcggcgt atccggttgc aggcgattgc caaaatcgcc
    17161 gatcgcagcc tgaacagtac gccgggcagt atcgcggcgc atcaggggta ctttgccaaa
    17221 acgttgcgtg agatgtcccg cagcacccaa atcaatggca tcacctttcc gggggaagta
    17281 aagccgccga aggatgggga tgtggtcatt gcgtggcgct ctaaaacggc ggtggaaatt
    17341 tatctgattg tccgtaccta cgaatgcccg aaagggatca cggtcagtct ggtgctggat
    17401 atgtcgctgg aggggagcgc atgacaaaac ggatttcggg ccagtcgttt gatttcaaca
    17461 tggacggcgc actggttcac gcggaaaaag tctcgctaag catcacggat aacaccgccg
    17521 ccgcgcagac gcagggcatc cccgatggct gggtggccgg tgacgtcgcc gccgaaggtg
    17581 aaatggagct aagtaccaag agcctggcgg tggtgacggc gaaagccagc agcgccgggt
    17641 catggcgggg tatcgagccg gtggacttga tgtggtacgc caaggcgggc agcgaggaaa
    17701 tgaaggtgga agccttcggt tgcaagctga tcctgagtga cattctggat gttgacccga
    17761 agggcggcag cgtgatgtca cacaagatta agtttgtggt caccagcccg gattttgtgc
    17821 gcatcaacgg tatcccctat ctggaatcgg aactgacgga aaagctgatc ggctaaggat
    17881 agtcatgcag gaatacgaaa agaacgcgct gggattactg gtgctggggg cgctgattgc
    17941 gctgggtaag ttgctggcca gtgatgaaaa aatcacgccg cgcctgtttt tcggccggat
    18001 gattttggga tcagccacct caatggcggc cggggcggcg ttgctgtggg tgccgggttt
    18061 accgccaatg gcggttaccg ggctgggtgc ggcgctgggg gtggccgggc atcaggcagt
    18121 tgaaatctgg ttgcgccgcc gtggtagtgg tttgctgaaa gggagtgacg caaaagatga
    18181 cgttaagtga aaaacagcag ttatttaccc aactggtcgc acaactgatc cagtgggcgg
    18241 gagagcgggg atatcgcctg acgttcggcg aggcataccg cacaccggaa caggcaaaat
    18301 tgaatgcccg caacggctca ggcatcgcca acagtttgca tacgcaacgc ctggccgtgg
    18361 atctgaatct gtttatcaat ggcgaatacc agacccggac agaagcctat ttgccgctcg
    18421 gtgaatattg ggaatcgctg ggtgggtgct ggggcgggcg ctttacctca cgcccggacg
    18481 gtaaccattt cagcctggaa cacaacgggg tgcgctgatg gatgggctat ggcgggttgt
    18541 ggccgggttg gcagtggctt ttgccgctgg ctggcaggcg gcgagctggc agcgtgacag
    18601 tatggaactg gccgtgaccc gcgccgctac tgctgccgtt gagcaatcac gccaggcgtt
    18661 gcaggcgctg gcgagccagt ccggcgcagc gctggaaacc aaactggagg cattacgcaa
    18721 tgtgccgaat aaaaccgttt accgggagat cgttaagccg gtttttacta acgtgtgcct
    18781 gtctgctgaa tttgtcagcc tgtacaacga caccgttaat cacaccgaac gtgtcttatc
    18841 aggaaaacct gaaaaagaaa tgcccggtca ctaatctgcc gcgcttatca ggtaccaccg
    18901 gcaatgatgc ggcgcagccg ttaatcagtt ggccgcaaat ttatgcggat tgtgccgccc
    18961 ggcataatca gttaattgat gaaataaccc aacgggaaaa catgcaatga gcaaaattac
    19021 cttatctgtt tctggcaagg aattatcgtt tgagccgaat accgtcgcct ataacggcat
    19081 gattaatgat atggcaatgg ataataaagt ggctccggcg gtgacgtatc ttcgccgtat
    19141 tgtcgtagcc aaagataaag aaacgctgga tgaattatta aaactgccgg gcgccgcatt
    19201 gcaaattacc gaagcggtga atgcgcaata tgcaccgaag ctggaaatcg aagtaaaaaa
    19261 ctaactcagc ggctgcgggc catcgaaaat aattttcttg aacaggcatt aaccctgcgg
    19321 cggcattatt taccggctga aaatgatgac gccgataatc tggcccgcgc cgtctggctg
    19381 gcaaatacac actgggaaaa tatgcgtatt tccgtggcga atgggattgc gctggcatta
    19441 aaaggcgatt catgaagcaa ctcgatttta cattaagcct gattgataag ctgacccgcc
    19501 cgataaaaca ggcgcaggcg gcggtcaccg gctttgcgaa atcgtcgcgg gacgcctttt
    19561 ccagcgccgc agttggtggg gccgggctta tcggtaccgc tatgtcgatc cagggtgcgc
    19621 ttggcccggc ggtagagatg cacgacgcaa tggtcgaagc gtcggcgcgt ggcgtggatg
    19681 attctgcctt gcagaagatt aatgctaacg cactgaaatt cagcacccaa tacgggcgat
    19741 cggcgctgga gtatgtgcaa tcgaccgccc ggattaatgc ggcggtcggt actctgacca
    19801 aagaggattt gccgggggtg gtcagggcat ccaatgtgat ggcggcggcg ctgaaagcca
    19861 cggcggacga gtcgtccgaa ttcatggggc agatgttcgc caactttcgc tctgatgccg
    19921 agtcaatggg taatgtgcag tttgcggagc aactggccag caaggccgcc tatatgcgta
    19981 atgccttcgg tgttgagctg ggggcgatta aagacctgat ggaaggcgcg cgcggggtcg
    20041 gtaccaacta tggcattggt atggatgagc agttggccgt gatgggcgag ctacaacgca
    20101 cattaggtac ggaagcctcc agcgcgtatg aaggcttttt gtccggggcg gtcaaggggg
    20161 ccaaaaagct ggggctgtcg tttgaagatg ccaacggcaa gttactgacc ctgcccgcga
    20221 tgctggagaa attacgcggg aagtacgggg cgagcattga gggcaatctg aaagcccagt
    20281 ctgatctgga tgatgccttt ggtgacagtg cggcggtcat taagcagtta tatggcaatg
    20341 tcggcatcct gcaacggcat atcaccgagc tgggcagcag tgacggtatg aagcgggcca
    20401 ccgaaatggc gcagaagatg gccagcccct gggaacggct gaccgctatt tggtacgcca
    20461 tccgcgccgc gatgggggcc acgttgctgc cggtgttgta cccgttgatc aacaagatgg
    20521 cggacggcgg gcaggtactt gtcaggtggc tgaatctgtt cccgaatatc acgcgggtca
    20581 ttggttattg cgtactggcg gtgatgagtc tggcggcagc cggggcgctg gtcaatattg
    20641 tgctgggcgt cgggcgcttt gtcctgatgg gcttgcgtgg tctatgggcc ggactgacag
    20701 cgattatccg gatccatata gcggctatct ggctctataa caaggccgtg ctgtcgtggg
    20761 cggcgacgat gcgtattttg cgcggtgtac tgctggccgt tcgtatggcc agtctgttaa
    20821 ccggcatggc attcaatatc gcgttgtggc cggtgttgct gattatcggt gcagtcgcct
    20881 tgctggtcgc cgggtgctat ctgctgatcc ggcattggga tgacataaag aacgccatca
    20941 ctcagaccga catgtggaaa accgtcgcgg aaaaagtgca atgggttgcg gagatattta
    21001 gccagacgtg gaaagccatt attgatggct ggagccgtgt tgtgaatgcg atggggagtt
    21061 tctccctgtc cgagacgatg gggaaaatgg ctgatggcgt cggggagata ttttccgggt
    21121 tgtgggacag tgttttagcg tcgttcaata cgtcgtatcg ctggattatt ggaaagctaa
    21181 acgcaattcc ggggatcaat attgccatgc ctgaatccac accccggccg ggcggtgagg
    21241 ggttattaac gggcgggaaa ataaagggga ttgattcggg cggattgcaa cgggatatca
    21301 gtaacagcaa tgcgaagaat tacaccgaca acagccggaa agtcgaaaac ctgacgattt
    21361 atgccaataa aggatttacc ccggaacaat taacagaatg ggaagcactg cggtaatgga
    21421 tgacgtgaaa tatattgacc tgttaattac agaacgcgat ttcagcctga atgcggggcg
    21481 tgagccgata ttttgcaata accggatcag tattggtcag gattgcattc acgccattat
    21541 tgaaagcgga ctgaccacca aactggtggc agagcgcagc ccgacgctgc gggccgatgt
    21601 gctgacgcaa atgataattc tggtggaaga cgatgaacgg attattcccg gcacggtcgt
    21661 ggtcagcgaa gaaagtccga cccggctgtg ggtgacggcg gaaacctatg attttgggcc
    21721 gatcacggcc agggtggacg tatgacggaa aagccgaaga ttgattatga gcaggcgctg
    21781 aaagaggccg ggatgccagt gacggccgag acggtaacgg aacagtttca ggcacaagtg
    21841 acggcatccg gtctgatcac taacacctcg agaatgtcgc cgttctggcg actgatttcg
    21901 gtcatggtga caacgccggt tatctggctg aaagacgttc tgatcagcgt ggtgctggcc
    21961 aatatgtatc tggctacggc gtccggctca ttcctcaatc tgttcgcctg gggtgtcaat
    22021 ctgtcacgta aggcggccac ggcggcatcg ggtgttatcc gcttctataa gtcggatgcg
    22081 gcgcaggccg tggtgatccc ggcgggtacg ctgatccaga ctgaacgcat taacggcacg
    22141 attttcagcg tggcggtgtc agcggatacc gtgatcaacg ccgggcaggc cagtgctgac
    22201 gtcccggtga ccgccacggc ggaaggcggg gcattcaatc tggcccccgg ttattaccgg
    22261 attttgccgg tgggggttgc cggtattgag cgggtggaga atcaagagaa ctggttgctg
    22321 acgcccggtg ccgatgagga gtcagatgat gatctgcgcg agcgctgccg caatcagttc
    22381 aatctggtgg ggaattacca caccgacgcg gtgtaccgca gcatgattgc ggcggtggcc
    22441 gggttaagca tcgatcggat tttctttcag catgacgccc cgcgagggcc gggtaccgcc
    22501 aatgcctatc tgttgctgga ttcgggggtg gtgtcgcagc cctttatcga tgcggtgaat
    22561 gattacatta cggcacaggg acaccacggc cacggtgatg atctgcgctg tatggcgctg
    22621 ccggaaacgc agcatgattt aaccgtgacg gtctatgtcc gcaatctggt gaacgtgtcg
    22681 gatgaggcat taaccgcctt gcgtaccggg tgccaggatt tagtccgctg cgcctttcgg
    22741 gaaaacaccg ggtatgacgt ggaaaagaca tggccctggt cgcgcttctc attttcaacg
    22801 ctggcacagg aattacacga cgtgttcccg ctgattgcgt cactggattt ttctctgggc
    22861 gatattgtca gcgggctggc tgtgccgcgt ctcgcctcgc tgacagtggt aatagacgat
    22921 gcctgatttt aaagaacaac tgtcgggcct gcggctgcca tcctggatgg ataagggcga
    22981 acccgccgcg ctgctgaatg ccagcaaagc ctattggttg caggtgaatg actggctgcg
    23041 ctggccgttg cagcaactgg acgtcgatac ctgcgcggag ccgttgctaa acgtgctggc
    23101 gtatcagcgc gatatttcgc ggctgaaagg ggaagcgctc gatttgttcc ggcggcgggt
    23161 taagtatgcc tttgtgaatg cgcaggacgc gggcagtgta gccgggttta tcgccatttt
    23221 tgagcgactg gggattggca cggtcacact gaccgagcgt cagccggggt atgactggga
    23281 tgtgatcctg gtgcgtatca acgatgagca gctaagcagt tataacgccc tgatgatgag
    23341 tctggtcagg cagtacggcc gcacctgccg ccgttatacg tttgacctct ggaatgggga
    23401 aacccagtca gttcggtgtg gagcgttcgc gcacaacgag gaatatcact gtgcgaccag
    23461 tgcgatgccg gtcggcatgg ttaagggggc ggttgccgtg tgtcatgcac gcatgtctgc
    23521 ctcaacagaa tattattcag ccaacgtgta agagggatta tggcgcagag tgtaattacc
    23581 catgcgtttg aaacgtggaa cgttcagcgg gtgctggatg gggtagcggc ccggcctgat
    23641 aaagtcgttt ttgcgctggt accgggtcag gatgaatccg tgccggtaga cagaaacgaa
    23701 gggtcacccc ctgccgaaca gattcagcat accgccgcca ttactcaggc gggtgtcctg
    23761 aatgaaaacg cggtggttta ttcggtggtg ctggatacca cggtggggga ctgggattac
    23821 aactggattg gcctgctgga cagtcaaacg aataccgtat tgatgattgt gcatgtgcgc
    23881 acccagcaga aactggcgac ccggaacggt cagcagggca acagtctgac ccgtaatctc
    23941 atgatgcagt ttgatggcgc ggcggcggct acgcaaatca acgtgacagc cgatacctgg
    24001 cagattgatt tttcagcccg cctaaatggt atggatgaag aattaaggct gtctcacatt
    24061 gatgtctatg gccgggcggc atttattaat gatgcttttt tagtcgttaa atcgaatggt
    24121 caatatcagg catcttcggg cgtaggttat ctgggcggcc tgcgggtagc cttggagcag
    24181 ccctttgata ttgtggtgga taaacttccg acgacgattg ttttggacgt gtgccggaaa
    24241 ggggaagtca ccgggcgttg ggagactgtt ttttcactga gtcagggtaa tggctttggt
    24301 ggtgttgttg aatatctgga tgatgtcggc attcgtcatt atagaaagag tatcgctaat
    24361 attgattctg ctggctgggt acatgatttg cgcatcaagg gaacgttgtc tcagcagaag
    24421 gcaatagttg attttttgcg taaagacaac aatctggcgg cgctgagtga taaggaagcc
    24481 agccgaaaaa atttagggct gggcgcactg gcaacaatgg atgtcgatac agccagacaa
    24541 gcgcttcaca tcgaccaaat agacaatgac cgcgttgtac gtgctggtgg tggtaacggg
    24601 atggcggatg gccatcagat tagcctgggg tggactggct cagggctacg ggtgcaagtg
    24661 gacgccacca gttttgattt atggcataag gataatgtct ttcccattca cgctgccgaa
    24721 atcgtgggta tccctttacc ttaccccggt gcaaccgccc ctgacgggtg gctgaaatgt
    24781 aacgggcagt cattcaataa agccgcgttt cccttgttgg cgcagcgtta tccctctggc
    24841 tttttacctg atttacgcgg tgagtttatc cgagggtggg atgatagccg aggggtcgat
    24901 cccggtcggg ggctattgtc atttcaggag agccagaacc tgacgcacag tcatggcgtc
    24961 aatgatccag ggcattccca tccgtataac aaatatgaag gctcggtcgg atcaggattg
    25021 gcggggtttg actatgacca ggacgcatgg aatgccacgg tatatacagg gcacgtgggg
    25081 actggcattt ccattgcagc cagtggcgga catgaagcgc gtccccgcaa tatcgcattt
    25141 aactacatcg tgagggctgc ttgatggcaa attattcagt gaatgttaaa gaaacgacgt
    25201 tagataacga cggtcacgcc atgacatcgg gctggatcac cgtctttcat gttgatgcca
    25261 aaacgcggga atatcgcggg gccagctatg aatatttgat ggccggggtg ggcattccgg
    25321 cgaatagcta tagcgatgct cccgaattac caccagaagg gaaagcgcta tgccgtgctg
    25381 ccgatggact ttcgtgggag catgtgccgg attatcgcgg taaggcggcc tatgatacgc
    25441 aaacccgcct tagtacagaa atcaccgagc ctggtcagtt gccagaaacg ctaacgctgt
    25501 tagcgcccgt ctcggaattt gatgtctgga atggcaaaaa atgggtgacg gataaggatg
    25561 cgcagcatca ggcggatgtg aatagcgcaa cgcaggaact gaacgagcgg tttagtacgg
    25621 ccaatacccg cattcaggcg ttaagcgatg cggtggatat ggaactggca accgaggaag
    25681 aaaagacgtt gctgggtaaa tggaaagaat atcgcgtgct gttaaaccgg gtcgatgtga
    25741 attcagcacc ggatatcgac tggccggagg ctccggcggt atgacatggc agcgggctga
    25801 tatctgcctc tcatccgcac tgccgccggt gacctgttcg gtgttgccgg ttcatccgtg
    25861 ggtgtatggc gtgggcaacg tgaccgacaa cggccattat ctcagcccgg ctaatgcggt
    25921 ggcttacatg gctgaacggc tgggcgctgc ggcggataac ctggctgtgt gcgtgtggat
    25981 ggtctgtggg agtggactgg gggaattcct gcacgcgctg gatgcattaa cggtagtttt
    26041 ccccgctccg gcattgagcc aggttgccag acaggcgcgg gctatggcag agctggctac
    26101 agtaaaaatg caaatcccgg ccaaaagccg cacgttgccc gccgccgcgc cgctgtcggt
    26161 ggcgagctgc cgtcaggcat tgaatgccca gcgtatggcg gttgcgcagc agcaggccgc
    26221 tgtaccgatg gggctgaatg cgctgaaagg gatggctgag cgctttacat cccagcgcga
    26281 ggcggcctta tcggaaatta gtcaagccat gcagcagatg gcccagcgta gtgcgctggc
    26341 gtgggttttt accgggcagg gtgcgccggg tgtgatagca gcggagatgc tgaaaaatat
    26401 cccccagcca tctgcgattt ataccgctgc catgatgttt acagggacag agctggaagc
    26461 gttggagagc atgatccgtg agccagataa ttacgctcgc ccttgatggc gaagctattc
    26521 ccctgcgtgg cctgactgtc acgccctcaa tgcaattcga agaaaaagac cagtccgggc
    26581 agacgtccag caccgccaac gcggagcagg gtatcaagcc taaagagcta cgtgtgtccg
    26641 gtgtgatccc gtttactgag gcgaaagtgt taacccggct gtttgccctg gcggaagcga
    26701 aagagggtga caagctgaaa cgctaccggg tggccaatcc taccgcgcag gccatcaact
    26761 tccgactggc caccttcacc gggtcgattg atgccccaaa acaggacggc aaacaagcct
    26821 ggctggtgac gtttacgctg cgtgaacata tcagcgtgtc ggaaaaacgg gacgcccgcg
    26881 caggtaatca gacggaaacg aagaagacac caggacaggg tagcgatggt gaaaacgatg
    26941 aacaactgag ctggtttgag cgcaaggtgc tgaaaccggt caatgacgcg ctggggtaag
    27001 ccatgcgacc gattacgcga ctgatgctat ccggcgatgc ggtacatgtt gtggacgtca
    27061 atgtggtact ggagttaaac gcctgtggcc ggggatttat tacggcagag acagagcagg
    27121 actataccgg caagctggtc aggctggatg tgggctatac cgatttggtg ttgcgctggt
    27181 ttaccggcta tgtcgagcgg agtcagcccg ctgaaaacgg ctatcaacgg ctgtttgtgc
    27241 gtgagctggc tggcgtgttt gacaggatgt ggccgtgcgc ctttcagcat ccgacgctcc
    27301 ggcaactggc tgactggctg agcgagcaca gcgggttaac ggtgcatctg cctgatgccg
    27361 ggtatgtcag ccagccgatt ccgcatttta cccatagcgg cagcggtcat cagttgctgg
    27421 ccaacattgg ggcggcgttc gggattgatg attacgtctg gcagccatta ccggatggtg
    27481 cgctgtatct cggcagttgg gccgattccc tgctggccgg tgcgccggtc agcattccgg
    27541 cggagttcag ccaagcgcag gccgccggta atagtatgac gttgccgctg atacagtccg
    27601 tgcggcccgg cgcggtggtt aaccagcagc gtctttcccg cgtgcagttg ctcaacgaaa
    27661 acatgactat cgagtgggta ccggtgagta ctgtcaccgg caaggcggcg cagcgtaccc
    27721 cggcccaacg tcagatcgac accgcttatc ccgaactgtc ggccggattg cacctgccga
    27781 agtttgcccg cgtggaagca ccctcagagg atgtcagcag cgggaatatc gccgacccgt
    27841 tccggccccg ttatgcggtt gacctgcaat tactggatgc agacggtaaa ccggcaaaag
    27901 atacgccggt gtattcggcg gtaccgctgc cggtaccgat ggcagggagt gaagccgggc
    27961 tattccagtt tccgccgccg gggtcgctgg tcgaggtcgg gtttaccggc ggtcgcccgg
    28021 ataagccgtt tgtgcgtcaa accgtagcca gtggtcagtc attgcctgat atcaagccgg
    28081 gggagcagtt acagcagcag cgggcggagg tttcacagcg cgtaacggtt tccggggact
    28141 gggagcggaa gaccgatcag gccatcaggg aatcgtcaat gcaccgggag gtaagtgccg
    28201 atgaagaacg gcgcacgctg gttaccagag aaaccctgat taaagcgacg gataacgcca
    28261 ctgtcttggg tacccacaca ctccaggccg gtgccatcgt acaaatcgct cagggggatt
    28321 acagcctggc tacacaggcc ggttatatgg ccagtgtggg ccagtcagcg acggtagaga
    28381 taggacagtc gctgaccgag aaaatagggc aattgcgccg tagcattgcc ggtgcgcgtc
    28441 aggaactgat ggcaccagtg gtatgggtcg gtagccagca ggtcaacgtc atgacgctga
    28501 tgctggatac gctggacgtg attcaggaac tggcgacgca gacggccagc cacacgcacc
    28561 ctaacaccgg caccccgtta aatgcgggcg agatacagca gaccggccgc cgcaccggca
    28621 cacttaaaga caagtacagc ccgataatcg ggtgatcgat ccccgcctac ccagcccgcc
    28681 gcgtgcgggc ttttttacgc ccctcgtatg acgcgctcag cgggctacta tgccacgcgc
    28741 ttccccggtc acctcgccac catgccgacc cattgtgccg ctgcctgtac cccgctgacg
    28801 cagccagcgc accgacaaaa tgaacgctca cgcgacaaaa tcggcactac accgcacccg
    28861 cctgcggttt ttggatcaca aagatttttc agttttattt ttctacaaaa cccaacgcca
    28921 gcccgcgccg ccgctgggct tttgcggaag aatgaccact gaaaacagcg aaaggaattt
    28981 cagcgttttt cagttttttg gatcgggaaa ggatcgcttt gaaattacaa ctgtcagaaa
    29041 taaaaggatt ttgtgtggat ttggtcagtt tgaatggatc tctgaatgtg agcaggcgtt
    29101 atctgtgggt cacagtattt gcagcaatca tgcgggcttg ggtgtgatga ggctgcttgc
    29161 aggaactgaa aagcggtgaa ccccgccagg gcggggcgag gtgcttaaag tttgccttcg
    29221 gtaatcccaa aatcgacgat gctcttacct tgaaggtcat aggtgcagtt gtatgtcatc
    29281 gtgatttttg cgttgaagcc gttggtaaat ttcactttgt caccgatgaa cgtcatttgt
    29341 tttttggctt cgttcaggcg gaaatgtgaa aacatggggg tcatcatgcc gtcagtccat
    29401 tcgaaatcat acttggatga cttttctatc agaggacggc agcgtgatgc tgcttcaatc
    29461 cagtttttat caaacaagca ttgaccgtca tttgctgcgc aattctttgg ggtgtcggct
    29521 tttgcagcgg gcttgttgtc atcacttccg ccaaagattt ttatagctcc ccaaaccagt
    29581 aacaccagaa ctacaaaacc accgattgcc tgacctgctg tggtaccggg atttttaacg
    29641 ccgcagtgtg ggcaaacttt tgcagaagtt gatacttctt tcttacattc tttgcatttt
    29701 gttaaagcca taaaccaagt cctatttgat tcaaagaagc taaataatat gacaagcaat
    29761 aggggaaact acagagaagg ccgtgcgtat gatgaaagcc tgtcgccatt ttgtcgccac
    29821 aggtaataaa aaaggggttc cgttttcacg taaccccttg atttaatt
//
