# Supplementary material for: May the Phage be With You? Prophage-Like Elements in the Genomes of Soft Rot Pectobacteriaceae: Pectobacterium spp. and Dickeya spp
Source: Front Microbiol. 2019 Feb 14;10:138. doi: 10.3389/fmicb.2019.00138 (PMC6385640; doi:10.3389/fmicb.2019.00138)
Supplement: Supplementary file 2 [file Data_Sheet_2.ZIP › Supplementary_prophagesGENBANK_files/Genbank FILES _SRP_prophages/phiDze2.gb]

LOCUS       Exported               37817 bp ds-DNA     linear   UNK 02-AUG-2018
DEFINITION  phiDze2.
ACCESSION   .
VERSION     .
KEYWORDS    .
SOURCE      phiDze2
  ORGANISM  phiDze2
REFERENCE   1  (bases 1 to 37817)
  AUTHORS   .
  TITLE     Direct Submission
  JOURNAL   Exported Aug 2, 2018 from SnapGene Viewer 4.2.3
            http://www.snapgene.com
FEATURES             Location/Qualifiers
     source          1..37817
                     /organism="prophage phiDze2"
                     /mol_type="genomic DNA"
                     /note="/genome_id=6666666.356858"
                     /note="/genome_md5="
                     /note="/project=robertczajkowski_6666666"
                     /db_xref="taxon:6666666"
     CDS             1..312
                     /codon_start=1
                     /product="Phage holin # possibly family II"
                     /label=Phage holin # possibly family II
                     /db_xref="SEED:fig|6666666.356858.peg.1"
                     /translation="MNETDKSIVSLFIIGTLIAVGKVLASSKPITLRLFVGRVMLGGFV
                     SMMAGIALVQFPDLSPVAINGIGAALGIAGYQAIELLIQRRVQQLSEQTKPEENDDAH"
     CDS             302..793
                     /codon_start=1
                     /product="Phage lysin, 1,4-beta-N-acetylmuramidase (EC 
                     3.2.1.17) or lysozyme #Protein S in phage lambda"
                     /EC_number="3.2.1.17"
                     /label=Phage lysin, 1,4-beta-N-acetylmuramidase
                     /db_xref="SEED:fig|6666666.356858.peg.2"
                     /translation="MPTNSPNLTAFLDMLAFSEGTATHPLTRNRGYDVIVTGIDGKPEI
                     FINYHDHPFANGRPGKIFNKQGQRSTAAGRYQQLYRYWPAYKALLKLPDFGPDSQDTLA
                     IQLIREQRALDDIAQGQVASAITRCSNIWASLPGAGYGQREHSIDRLLTAYQQAGGELA
                     "
     CDS             790..1230
                     /codon_start=1
                     /product="Phage endolysin"
                     /label=Phage endolysin
                     /db_xref="SEED:fig|6666666.356858.peg.3"
                     /translation="MKSSMIIAAIIMLLSAGIGVQSWRLHTNRQLTEQQAQTLSLQQTA
                     LNEKSSQLTALSEQAERSNIEQARLRDMAADTQVALSERQKMIVRLQHENEALKRWADS
                     ELPADIIRLRQRPALSGGRAYREWLSQTDSLPVSTRQPTNQR"
     CDS             complement(1730..2737)
                     /codon_start=1
                     /product="Phage integrase"
                     /label=Phage integrase
                     /db_xref="SEED:fig|6666666.356858.peg.4"
                     /translation="MSVSKLSSGKWLCQCFPYGRDGQRVRKQFATRGEALAYERRLMAE
                     KKGISTETNSTTLQDLIQRWYDMHGQTLESGEDRYAKLMAICDRLGNPFAIDVDKNMFA
                     VYRERRLKGEWNPKGKTAIKEATVNREYSYLRAVFSELKRMGEWEKENPLDGIRQFKEG
                     DQELAFLYPDEIKRLLAACDESENKDLGIIVRLCLATGARWGEAQTLKQSQILPGRITF
                     VKTKGKKNRTIPISERMHALLPKRRGQLFKPAYEAFKHALKKAHIELPEGQLTHVLRHS
                     FASHFMMRGGNILVLQQILGHSSITMTMRYAHFAPDHLDAAVTLNPFDSLTTDE"
     CDS             complement(2747..3046)
                     /codon_start=1
                     /product="hypothetical protein"
                     /label=hypothetical protein
                     /db_xref="SEED:fig|6666666.356858.peg.5"
                     /translation="MQRRADLQNTATKADLQSFATKADLQTVNTEFQSEIQSLRTDIQS
                     LKTETKTETQSIRTEIQVVRTDIEKAISGQTKWLVGAIFVAMGVMLTAAKFIFS"
     CDS             complement(3030..3299)
                     /codon_start=1
                     /product="hypothetical protein"
                     /label=hypothetical protein
                     /db_xref="SEED:fig|6666666.356858.peg.6"
                     /translation="MSNDNKVVQLHDTQLPFADRMKDNSNGGNGGGDGMLETRVAKLES
                     DVEHIKRDVTDIKVDFKAANVDISTIKQDIAVLKERSGHFATKS"
     CDS             complement(3289..3729)
                     /codon_start=1
                     /product="hypothetical protein"
                     /label=hypothetical protein
                     /db_xref="SEED:fig|6666666.356858.peg.7"
                     /translation="MNNSDEENIGLEQLLSQGKAQKELAEDKLKKRLKQVTPKLFADFL
                     AEKGAAQHCLSCGYTKLSVPESGSFNPADLPDSFEEIPIEELMKTIKRYVTYHYIDPNA
                     YPRPSNCEYRVSCMNCGHVSSYRVNPVLQWIEDKNKAVDDEQ"
     CDS             complement(3834..4445)
                     /codon_start=1
                     /product="hypothetical protein"
                     /label=hypothetical protein
                     /db_xref="SEED:fig|6666666.356858.peg.8"
                     /translation="MSAESHGNENRIAGRDFYESSITVDKINIAIPAANEEKRPLVPAQ
                     RKQLNQLVKEIADSGYEEGFSVWQRVHAEIGVKSIEDMTVNQYQTAVSYLQALRDRYRE
                     KDASNALVHLLLKNTQQVDQRQQLIHYCHIHFGTGRLTELTRSQLQQALSWLDDRQCST
                     VPEQTEPNARQSWQEVLLANPTVFGAVFVSGMVFGVFLFR"
     CDS             complement(4519..4926)
                     /codon_start=1
                     /product="hypothetical protein"
                     /label=hypothetical protein
                     /db_xref="SEED:fig|6666666.356858.peg.9"
                     /translation="MTGRKIILSRFYFFAAILLGLVFVSTAQATSWYQGGTLHNATALE
                     WQKASRDNKVATCADILASMYEKKRLAPSIVSSLKSIDDFKPYALKLADQLDQAFKPDP
                     NVAKNKKLFANQTVSETAAMLLILMKWTNIN"
     CDS             complement(4954..5370)
                     /codon_start=1
                     /product="Transcriptional regulator"
                     /label=Transcriptional regulator
                     /db_xref="SEED:fig|6666666.356858.peg.10"
                     /translation="MSTLKEEFLFLIGERLRQERETIGKSQSAIAEELGTTTRTWGKYE
                     RGETAPDGVTLALLSARYGMDISYILTGKRVPDLGDISNDESELVKIYRAAPLAVKAAA
                     LAALTAGSSASAGTINVTGSGQRVAGRDYHESKK"
     CDS             complement(5451..5573)
                     /codon_start=1
                     /product="hypothetical protein"
                     /label=hypothetical protein
                     /db_xref="SEED:fig|6666666.356858.peg.11"
                     /translation="MLERERLSFSANAASLARSSSESLMGVGLRDAIPRGKRDR"
     CDS             5631..5843
                     /codon_start=1
                     /product="hypothetical protein"
                     /label=hypothetical protein
                     /db_xref="SEED:fig|6666666.356858.peg.12"
                     /translation="MSKGLTININVPTPYVSLRKYSELTGIPFETCRGMVKSGKIIIRP
                     KEKANEKVEVNLVAMLRDAIASSEI"
     CDS             5853..6068
                     /codon_start=1
                     /product="hypothetical protein"
                     /label=hypothetical protein
                     /db_xref="SEED:fig|6666666.356858.peg.13"
                     /translation="MENKKSGHQYAITQLSKHTNVYRGFSIIKCPRTTLNPIIRYRVSQ
                     AGQSYGLFDALTLATGYIDNLYTARR"
     CDS             6284..6625
                     /codon_start=1
                     /product="Phage protein"
                     /label=Phage protein
                     /db_xref="SEED:fig|6666666.356858.peg.14"
                     /translation="MANTEPARAIPLSIAERTDGLNHIAMLRGKHFKTNSEKEMCRFID
                     DMRDKIDDDYHKNMRVLSAIFELADIDKERHHLKFNELTTDEKERLIKAMNKLRAVVSL
                     FPKNLILPL"
     CDS             6690..6920
                     /codon_start=1
                     /product="hypothetical protein"
                     /label=hypothetical protein
                     /db_xref="SEED:fig|6666666.356858.peg.15"
                     /translation="MKNAEVKTMTVANDGALVELLKKARLEERKDQHLSFSLRLAALAV
                     RAQQRDLSAAEMVELIRQESERFERSAQELS"
     CDS             6920..7144
                     /codon_start=1
                     /product="Phage protein"
                     /label=Phage protein
                     /db_xref="SEED:fig|6666666.356858.peg.16"
                     /translation="MDSIDMAQEREAFIRETQIQKARQQSGCAVSAFVCESCDAPIPEA
                     RREAVPGVRLCVYCQGDAELKNKHYRGAL"
     CDS             7141..8097
                     /codon_start=1
                     /product="Methyl-directed repair DNA adenine methylase (EC 
                     2.1.1.72)"
                     /EC_number="2.1.1.72"
                     /label=Methyl-directed repair DNA adenine methylase
                     /db_xref="SEED:fig|6666666.356858.peg.17"
                     /db_xref="GO:0009007"
                     /translation="MSIIATPLKWVGSKARVMDILREHLPAGDRLVEPFAGSCSVMMNT
                     DYPEYLIADINPDLINLYQVIKEDVKEFIDTAEGLFRTANTAESYYRFRQVFNRSKENR
                     TTSAALFLYLNRHGYRGVCRYNRAGGFNVPYGHYASPYFPLAEIQAFAEKARRAKFICA
                     AFGETLQLIRPGDVVYCDPPYIPQTPTASFTSYHTDGFTHNDQYDLCSALSRLAERGIP
                     VIASNSDTHHAHSLYHRFDICRFTAPRSVGVAAGESKQAGEIIAKRLPIPAAQSLSKVC
                     DGCGYEGGGHCPDCGPVMGDATYQEMVASGALNAEPF"
     CDS             8098..10638
                     /codon_start=1
                     /product="Phage replication protein # Replication gene A 
                     protein"
                     /label=Phage replication protein # Replication gene A
                     /db_xref="SEED:fig|6666666.356858.peg.18"
                     /translation="MSEQWAYPWNAPRPAISAPPGVADLRPSLFVTDAEPHPTVTRHLS
                     RMVKRALAAPGDDRNLNQVVAQLEHREPNGTQLLIRRGLAEIVRRDHQKTLSDWMKTPE
                     GVEARLHEQPFFIRDVYRQKIEWLRANREPRHISAFFMGTVKKALLRLDAVRAQQGVRG
                     GFTSELAAYWGPRWAHLAGFTKHEVINAAHTLAAAIAEMFETECGHTSPEDMTDDEIQW
                     LYRHLGRELLALRVTPPCWGLVIGDEQTRHRIYSAILRITSPEWWGRKLWRLRCEWREN
                     QFRAIGVIHKKRMPYVSLDALNQWQEQRRKNRVFIQTHELVDEDGNITSLENMVYGSIS
                     NPAIRRHELMTRMAGVEMVAIARGDEGVFLTITCPSRYHANIQNGHQNPKWDHASPRQG
                     QRYLCRTWARAMSALNRRGLRPYGFRVAEPHHDATPHWHVLLFMPPADRKAITDILREY
                     FIAEDRAELGRNTGARFKAKKLDPRKGSATAYVAKYISKNIDGYALDGELDNETGKPLR
                     ETAKFAMAWASQHKIRQFQPFGLPPVTVWRELRRLANQLTAAQKENGTFKRGAAQLADP
                     AMDAVLASADAGCFATYIEKQGGVLIPRERYTVRIAYEDADEQNTYGEIPEKIFGVFSP
                     RLGAISRICTRLIKWKIRKKQSADDGASISTGSGLAVTSPTGDAWSSVNNSTGDEKTAI
                     PAGIGGDDYGSCELSDGEPGDTSAQTFADFERMTDPERRALLSRLRTQPPDRRNNQHSS
                     TTQRNKSAEKQVVGKLSDEWRASIADFARSIGWDISNIEIQRLALGHTLAFSGQIYVSR
                     SDGCLYRVRPERQPGNIAATVSNWVRRLRTAGSR"
     CDS             10832..10945
                     /codon_start=1
                     /product="hypothetical protein"
                     /label=hypothetical protein
                     /db_xref="SEED:fig|6666666.356858.peg.19"
                     /translation="MNETKPEHRFKIIIKIIINNVNHSTNYNSLNFKLNKK"
     CDS             11051..12895
                     /codon_start=1
                     /product="predicted ATP-dependent endonuclease, OLD family"
                     /label=predicted ATP-dependent endonuclease, OLD family
                     /db_xref="SEED:fig|6666666.356858.peg.20"
                     /translation="MRINNIYIKNFRKLKNCEIKFRDTTFLIGANNAGKSSVFKALDYL
                     HKNTNVTLEDYAKHYDAETDDIIREDEIEIIGEYHNVPEEANNWIGFKGRVIRNNEPLP
                     GETPYKIIFRKVWKINTTKPEVYLKEYTKSRSEKYRSANKPSDLVGDEFDINYLTEYFG
                     TENIEKSLTGKENKDKMNELPQLWDVDTTTEAQWIKNPGGIPGNVLSRLPKVVIIPAES
                     CITELTSQNGALLNTLTDLFNSVRRSSPNYAQAQQYLAQLAREMNPQDTETEFGRLMNE
                     LNNMAHTLFPNTSIHVSANLDDADKVIKPIFDVEMESNVKTAVSYQGHGMIRTTAFQLL
                     RFAQEFVNRTLDYPRDTILCFEEPELFLHPAASNQLRDALYNFVGENNQIIATTHSPYM
                     INLGSEKSISLTKFSIDESNFSVTNSFNLEKAFIDLQSDEKQNLKMLLKIDDYIARIFF
                     TKKCIFVEGDTEEVVIKETIKRLSSKDKAIVIGNCELLRARGKAVLISIAKYLNALGID
                     YIFMHDRDQGTERAEAINPLILAETGENRRVMIEECIENILGYDPPSNEKPFKAYKYIE
                     ESWPDNFDQLPDNWKRIFIKLYHPYLNHLSPQERPQDI"
     CDS             13372..13782
                     /codon_start=1
                     /product="DNA-binding protein, CopG family"
                     /label=DNA-binding protein, CopG family
                     /db_xref="SEED:fig|6666666.356858.peg.21"
                     /translation="MFYPIAIEAGDDTHAYGVTVPDLPGCFSAGDTLDEAIANAKEAIT
                     GHIELLIEMGQDIPAVSSVGTLAKAPEYTGYTWAVVDIDVTRLMGGAEKINVTLPKSLI
                     DRIDRCVASNPEFKSRSGFLAQAALERISSIR"
     CDS             complement(14228..15280)
                     /codon_start=1
                     /product="Presumed portal vertex protein"
                     /label=Presumed portal vertex protein
                     /db_xref="SEED:fig|6666666.356858.peg.22"
                     /translation="MKRKDKTGTHRAVTASQPDMAAALKSDPGLSAFTFDGPYPVRDGH
                     DLLDNMYCADNGRYYDTPVDWYGLARAFGSASWHQSALYFKRNALTGCFIPHPLLSRQA
                     FSAFVLDWFVFGNGYLERRVNRLGGLLDLRHVPAKYTRRGSDLNTYWFIRQWKDEHTFA
                     TDSVCHVINPDIHQEIYGMPEYMGALLSASLSHSADMFRKLYYDNGSHAGCIIYIGASQ
                     VDNESMESVKKTLKEARGKGAFKNLLLHAPGGGEKGVQIIPFSQISAKDEFLNIKSVTR
                     DDILAAHRVPPQLMGAMPEGNGSFGDVEKAARVFAINELMPVMEALKHVNDWLGMEVIR
                     FNPYALLKTE"
     CDS             complement(15280..17007)
                     /codon_start=1
                     /product="Terminase, ATPase subunit"
                     /label=Terminase, ATPase subunit
                     /db_xref="SEED:fig|6666666.356858.peg.23"
                     /translation="MIQDAFVRQRAKQLYWQGYPPAEISRLMGINQNTVYAWKKRDEWD
                     ETPPIQRVTHSIDARLCQLAQKPTKTGGDLKEMDALTRQLKTLNDGQPGNAAGGKKPRQ
                     RKVKNHFSDEQITALRTNILDSLAWHQNGWYEQRHHRNRMILKSRQIGATWYFAREALL
                     RALRDDVAYPYQRHQIFLSASRRQAHQFRGFIQKVAEEVDVELKGGDKIVLSNGAELHF
                     LGTSAATAQSYTGNLYFDEFFWVSNFANLRKVAGAMATLKGLTRTYFSTPSSETHEAYP
                     FWTGARWNEKRSKAQKVAFDVSWKALNSGLLCPDKTWRQIVTLQDVIDHGWEYTDLEEI
                     RDENSPDEYNNLYGCEFVRDGESAFNLNLLFSCGADGYDEWPDWKPFASRPMADRGVWI
                     GYDANGSSGNGDSGAISVVVPPLVAGGKFRTIETQQIRGLEFEEQAKVIEALTFKYNVQ
                     HIAIDGTGIGEAVYQIVKKFFPTAVCFLMSVSSKRALVLKMLQVIRAGRWEYDRSEQAL
                     INAFNAVRRVKTPGGIMTYDTDRARGSNHGDLAWATMLAVINEPLGQEQGGGGFAMEF"
     CDS             17130..18005
                     /codon_start=1
                     /product="Phage capsid scaffolding protein # Fam Scf032"
                     /label=Phage capsid scaffolding protein # Fam Scf032
                     /db_xref="SEED:fig|6666666.356858.peg.24"
                     /translation="MMSQTPQDRTTGMSGTAKPTRKKFRVAVSGSTVDGREIGRDHLYA
                     MAESYNPQVYGARVNVEHILSPYPGSDFSAMGDVIALSAEDITDGPLKGRAALYAEIEP
                     TERMKQLTGEGKKIYSSIEIDPQFAATGKPYLRGLAMTDTPASLGTDRLKFAAQQRAQV
                     QAFNNLPGEPVMFTEAMEAELVELSEQRSDEGKQWFSRVMGIIGKGRKSDSEQFNQVRE
                     AVENVAQSHADLLDSFNTLKTQQQQNSRTIQTLTSELAALTQKLATQDNSYSQRPAASG
                     GNSGAQLADF"
     CDS             18031..19086
                     /codon_start=1
                     /product="Phage major capsid protein #Fam0066"
                     /label=Phage major capsid protein #Fam0066
                     /db_xref="SEED:fig|6666666.356858.peg.25"
                     /translation="MENTTRNLFDQYISRQAQLNGVQPNAVAMTFSVEPAIQQRMEQAA
                     QEGDEFLKQINVFGVKAQEGQKILIGSKGPIASTNNSSDGTSRRNPTDNHSKEPNDYHC
                     RKVNYDSAVSYPQLDAWASQPNFQALISQANARQIGLDRIMIGFNGTTYAEKSNRSANP
                     LLQDCGVGWLQKIRNDAGHRIIKNVTLTARDEDNKIVTKGTYGNLDTAVFDAKNSLLDP
                     WHRRAPDLVVIMASDLLTSSNFPRLNALSQSNPNTELLAGQLIVSQERVGGLPTFLAPY
                     FPSNAVLITSFKNLSVYYQLGALRRSIVEEPEYNRVATYQSSNDDFVVEDYGKVALIDG
                     IQFAQAAGDGQ"
     CDS             19130..20011
                     /codon_start=1
                     /product="Phage terminase, endonuclease subunit"
                     /label=Phage terminase, endonuclease subunit
                     /db_xref="SEED:fig|6666666.356858.peg.26"
                     /translation="MLTPAQRHFQRVMAERRGQADTETAVSRTAHEQILHRLRLHQAAL
                     KQVQSDATKAEMKKAMLPEYDGWIDGTLEGDSGRQDEVIVTLMVWAIDCQDRALTLRLG
                     RYVVKHGLSLPADKFRRDAVTVLAEEVSNPVLTLATTDADADLSGYTAVLDEVAAIVDG
                     KDMPDEVRAKLCKARAFSRRAAVDAQTKAEALTLFREAMARNPNAGVKREIATLTRELK
                     KLMPGSSDAPEDGAPGDDETTMETAAGETPPAASADAAQPAVKKTAVRNTTARKTTRPT
                     GKSKAARQSAKR"
     CDS             20110..20601
                     /codon_start=1
                     /product="Phage head completion-stabilization protein"
                     /label=Phage head completion-stabilization protein
                     /db_xref="SEED:fig|6666666.356858.peg.27"
                     /translation="MSLVAQKRVSDSGDVPEIDDGTATVNAGEFWPVIVLRDLRLAARI
                     TGGITTTRLMHVTTEAVVHVTDQLASWQQTQQAAGYVALADVPARQVNGESIKVYRFRR
                     AVYAIARALLLEGYRDVDTTAKGDKATDTFDNQCDDLWRDARWSIADISGAQRLFAELC
                     "
     CDS             20601..20801
                     /codon_start=1
                     /product="Phage protein"
                     /label=Phage protein
                     /db_xref="SEED:fig|6666666.356858.peg.28"
                     /translation="MVVRALQGDTVDLLCYRHYGTSAGVTEQVIAANPGLSRQMFLAAG
                     QAITLPDIPRQTEQETVQLWD"
     CDS             20792..21094
                     /codon_start=1
                     /product="hypothetical protein"
                     /label=hypothetical protein
                     /db_xref="SEED:fig|6666666.356858.peg.29"
                     /translation="MGLNDLQRLNDGVTYGLSVMVTGIGVMTVSEKVALAGLVIGVVTA
                     WRAWLFRRRIERAQRRRNELIEQILQQSERRTLNTSERRAVAILHQGDVDDENRD"
     CDS             21078..21623
                     /codon_start=1
                     /product="Phage lysin (EC 3.2.1.17) # Phage lysozyme or 
                     muramidase (EC 3.2.1.17)"
                     /EC_number="3.2.1.17"
                     /label=Phage lysin
                     /db_xref="SEED:fig|6666666.356858.peg.30"
                     /translation="MKTAIKRCSIALIVALGITLSPGTLRTSPEAQQKTASWEDCRASP
                     YYCPAGVLTVGIGSTGNVQNRPYSNDEIARRWVNDMQRAENCVNGNFNGAAMPQSAFEA
                     MTDTAFNLGCSGLMWFTDRQGSKQRTTIWKHAQAQEWPAMCERLTDFVNSGGQRSAGLV
                     NRRSDFKAWCLRDLAGVP"
     CDS             21620..22057
                     /codon_start=1
                     /product="hypothetical protein"
                     /label=hypothetical protein
                     /db_xref="SEED:fig|6666666.356858.peg.31"
                     /translation="MKLTATLAVLLVLAVGGVLWQTYQRGIDRAHTEALTDSARQQREL
                     LTEFRALADDARNVLAQVREREQQRYAEGEERREKMREGMQPDTCANTVVPAAVSDSLQ
                     KRAAVVQRADTARPGTAQPDGTHTDARTENTGDLGRGRALE"
     CDS             22026..22163
                     /codon_start=1
                     /product="hypothetical protein"
                     /label=hypothetical protein
                     /db_xref="SEED:fig|6666666.356858.peg.32"
                     /translation="MTWGAVALWSDQLLDALDTCNADKAAINDVYLRRLQRLKDAAATP
                     "
     CDS             22174..22632
                     /codon_start=1
                     /product="Phage tail protein # FIG072132 and FIG003673"
                     /label=Phage tail protein # FIG072132 and FIG003673
                     /db_xref="SEED:fig|6666666.356858.peg.33"
                     /translation="MLKTDSLRDALTASNTWCRANPEAFTVFVEEGGIETTGETPSFLY
                     RYSLVLFVMNFTGDIDDFTLPLMAWLWQNQPDLLLNPQKNREVKFTTLINNDDSADILF
                     EIPVRERVKVTRVDNGILRAEHLPEPRPRLTGGVWDAVLDDATGETAT"
     CDS             22629..23267
                     /codon_start=1
                     /product="Phage tail completion protein"
                     /label=Phage tail completion protein
                     /db_xref="SEED:fig|6666666.356858.peg.34"
                     /translation="MTDKLFHALDQVFDDILSGLSPAGRLKTARQVGQALRRSQQQRIR
                     AQRNPDGSAYATRRRKVLRSQKGMIFVWEGQVRHLKNWHGGRGKYGRTITGFDEDRNAI
                     RTFYRSDIERYIEINTQTVRRTTSKTTPMFQRLRGYRFLKMQADTDGASVGFDGIAARI
                     ARVHQYGERDKVGPGAFARYPVRELLGISLADERLIHDTVINSLGSAAT"
     CDS             23264..23845
                     /codon_start=1
                     /product="Phage baseplate assembly protein V"
                     /label=Phage baseplate assembly protein V
                     /db_xref="SEED:fig|6666666.356858.peg.35"
                     /translation="MSAELMRLLENLLRVGVVTAVDLESWRVRVKSGELLTDWLRWNTS
                     RAGAFNVWFPPAVGEQVLLGCLGGNPETAVIIGSLFSEAHPAPGNSLKEIVITAPDGAR
                     FRYDAVAGALEATGMKTANVVAAVSVTLNTPVVECTQHLKARTVEITHGGTLAGNVAHS
                     GGAMTSNGVQVDSHRHGGIQPGGSWTSGTQ"
     CDS             23842..24210
                     /codon_start=1
                     /product="Phage baseplate assembly protein"
                     /label=Phage baseplate assembly protein
                     /db_xref="SEED:fig|6666666.356858.peg.36"
                     /translation="MTATYTGMNPHGTGTLTDADQLWQSVRDILTTPLASRVMRRDYGS
                     LIPDLLDAPQNAVTRLQLMSAAVIALTRWEPRISLNAVDIRYSASGAVEAELSGLITET
                     MQAASSTLTLRSHGDGDG"
     CDS             24197..25093
                     /codon_start=1
                     /product="Phage baseplate assembly protein J"
                     /label=Phage baseplate assembly protein J
                     /db_xref="SEED:fig|6666666.356858.peg.37"
                     /translation="MATVDLSQLPQPQIIEVLDFEVILQDVKAVMITAFPAAQQASVTA
                     ALSLESEPLTVIAQVIAYREMMLRQRINEGAEACLLSHAVSSDLDNLAANLNTQRLTIT
                     EATDTADAVMEADSALRLRAQAAFEGLSVAGPTGAYEYFAKSASGKVADAKAISPSPAV
                     VVVSVLSTEGDGSASADLLAAVDAALSADDKRPVGDRLTVQSAGIVRYAITAVLYRYPG
                     PESEPIQQAAQQALTSWLGTQGRIGRDVARSAIMAALHVQGVQRVELLEPAQDIVISDT
                     QAAYCIGFTVTEGGSDE"
     CDS             25086..25694
                     /codon_start=1
                     /product="Tail protein I"
                     /label=Tail protein I
                     /db_xref="SEED:fig|6666666.356858.peg.38"
                     /translation="MSNSLLPPSASDFMRNVANSTQRLSEIAVCLDTLWSAERCPAQLL
                     PYLAWALSVDRWDKRWSEQTKRQVIKAAWLVHRQKGTLAALRRVVEPFGYLIRVTEWWQ
                     TGGQPGTFRLDIGVQDSGITEETYLELERLIADAKPVSRHLLGLNIVMDCAGNIPLAAG
                     QYSGDTLTVYPYFPETITTTGIDVRGAVVHLSDNMSVSA"
     CDS             25691..26803
                     /codon_start=1
                     /product="Phage tail fiber protein"
                     /label=Phage tail fiber protein
                     /db_xref="SEED:fig|6666666.356858.peg.39"
                     /translation="MTTKYYAILTNTGAALLANATALGRQLPITQMALGDGGGTLPTPD
                     PAQTKLVNERRRAPLNSLNVDPANPGQIIAEQVIPEDEGGWWIREIGLYDANGNLIAVA
                     NCPETYKPKLQEGSGRVQTVRMILIVSSTDAVTLKIDPSVVLATRSYVDGKFSNAVLTG
                     TPTAPTAVVGTGTTQIATTAFVQTAVSTRVDEVTGNAPGALNTLEKLAKSLGNDPDFVS
                     AVSMSIGRKLDITEIVGIPLPWPQAIAPTGWLKCNGQAFDKAVYPRLAQVYPSGVLPDL
                     RGEFIRGWDDGRGVNPIQPLLAWADARLAVHTHEMPTARMAVGVDGVSSTWVVVENDVS
                     PTKVFTHQQAGGAGETAPRCVAFNYIVRAA"
     CDS             26803..27426
                     /codon_start=1
                     /product="Tail fiber assembly protein"
                     /label=Tail fiber assembly protein
                     /db_xref="SEED:fig|6666666.356858.peg.40"
                     /translation="MSEKYSVAVQSARMGKSGLAECAGWLTVYHVDQQTREYTGASYEY
                     MSVGTGLPADSYADTPDLPTAGQALRRSADGAGWEHVPDLRGKTAYRTADGQPQTVTAL
                     GELPDGLTLFSPSTAFDKWNGETWVTDVVAQQAAAVAAAQQEQAARKTAATARITELSY
                     AVELGIATDAEQAALKSWKTYLVQLSRIDTSAAPDIDWPEIPST"
     CDS             complement(27455..27964)
                     /codon_start=1
                     /product="Phage tail protein"
                     /label=Phage tail protein
                     /db_xref="SEED:fig|6666666.356858.peg.41"
                     /translation="MMMVFGLFVFELQTLPYQQLQQSRAWRHVKNERINRSAKWQYIGA
                     GEDQITLSGVLYPEITGGEVSLTALTTQAYSGRPWPLIDGTGQIYGMYVLTGMQTTRTE
                     LNRYGKAKKIEFSLSFQRCDEDLREKLQSSSFSDMMDNARSSATKAMNTVSTAMTDTVN
                     TLKGLV"
     CDS             complement(27977..30952)
                     /codon_start=1
                     /product="Phage protein"
                     /label=Phage protein
                     /db_xref="SEED:fig|6666666.356858.peg.42"
                     /translation="MKSLDIRVAFSAIDRLTRPVNAARQSAGGLSESLKRTQAAIKDLD
                     NQSRTFNRLRDSVQKTSRKIDEASRSLDGLKKAQQNNTVLTDKQREHMAALAAKLERLN
                     VTRDQEMVKLRAASQALRGHGVSLVGSNATIQSAIRRTEQYNQTLERERRQLAAVTQAR
                     ARYERMQQTAGKLRGSGTMAVAGGAAVGYAGGQFLAPAVGFDEEMSRVQALTRLDKGDQ
                     QLAALRAQAKKLGAETAFTTRDAASGQAFLAMAGFTPQAIQAALPGVLNMALAGGMELG
                     ETADIGSNILSQFNLDASQMDRVSDVLTGAFTRTNTDLFSLGETMKYTGPVAAKLGISL
                     EDAAAMAGMLANNGIRGSDAGTAMRASLARLASPPKAAAEALKELGVSVADAKGKMRPM
                     QDVLRDLYKATKKYGQVDQVSFFKDIAGEEAFVGLQTLVQAAGSGALGKLSGELKKAKG
                     EADAVAKKMADNLGGDLKNLDSAWEGFRIQVEETTDRPLRSLTQGLSDVITNVSGWVRE
                     NPRLTQTLLLAVGGAAAFAVAIGGTSLAIGLLMGPLAKLQLGFSLLLGARGVGGAVSMF
                     SGLSSLLGGPMARMGGWLQLFSGSTGRLAATLTPLRGMLLAVFTSPVSALGALVRGVGG
                     LLLRLSGLHVLWSLITGAVSVLGGVLSLLLSPIGLIGTAFVAAGLLIWRFWEPVRTFFS
                     GMFTGIVISLGPIRQAFTGLAPVFDVIVSAVSRLWDRFTQLFQPIQTTKKTLDDCAIAG
                     YGFGKVLGSALDMLLLPLQKLMEGIGWVLEKLGLIPSGLDAAQKKADQLKGELTPEGKD
                     RLQGLVANLTGDLKGATTAPPPAPKPPLTGDSGTQRRLQKIADNTGGVLEETKKRIGPG
                     DIVFKNLPKALAVRGEWQESRLTGGTPSAPSQPVQTMQALSDRPAVVAATQPVKQADAA
                     PVSRPAARTPAAGGFNGEIHIHLHGVERQDARELGRIVADAVSAELARRDRLQRGSFRD
                     RE"
     CDS             complement(30939..31097)
                     /codon_start=1
                     /product="hypothetical protein"
                     /label=hypothetical protein
                     /db_xref="SEED:fig|6666666.356858.peg.43"
                     /translation="MQFDQIDDLVADIAVVFNWPPSELFSMDLGDVIAWRARAAIRSGA
                     SEADEKP"
     CDS             complement(31103..31420)
                     /codon_start=1
                     /product="probable tail protein"
                     /label=probable tail protein
                     /db_xref="SEED:fig|6666666.356858.peg.44"
                     /translation="MNTPNEHTVTLATPIVRGDNAISQVSITDDIKQAGSLRGLRLVNV
                     LNMDVDSITTLLTRVTSPKLKLAEINAMDTRDFMRLAEAITPFLVHAEPGEPNAEATEE
                     A"
     CDS             complement(31466..31981)
                     /codon_start=1
                     /product="Major tail tube protein"
                     /label=Major tail tube protein
                     /db_xref="SEED:fig|6666666.356858.peg.45"
                     /translation="MAVPHKLRLFTCFVNGNNQIGKVTSVTLPKLTRKTEDFQGAGMIG
                     SVAVDLGMDSGALEAQMVVGGMEKKLLLEYGGDIDDVRLRFAGEYYTDGDSQLVEVEMR
                     GRITEIDGGESKQGEDTSVTYALKNTYYKLSIDDQSVLEIDLLNFIYKKNGKNIYPDRI
                     TSALGLGN"
     CDS             complement(31982..33172)
                     /codon_start=1
                     /product="Major tail sheath protein"
                     /label=Major tail sheath protein
                     /db_xref="SEED:fig|6666666.356858.peg.46"
                     /translation="MVANMSETRFHGVRVRENTDLVTAINDIDSSVIGVVAVAEDADAD
                     TFPLNTPVLITRVNSVLGKAGKTGSLYKTLKAISDQTSPKVIVVRVAAATEGGDKTQSQ
                     LIIGGTATDGSYTGMYALLTAEAKVNYRPRILAVPDYDTAEVTSALCVIAQNLRAFVYA
                     GCHGCTTMAEAITYRAQFAYRELMLIWPDFIAYNPLSGSNETFPASAYACGLRAAIDND
                     QGWHKSLSNVAVNNVLGISRDVFWSLQAEDSDANELNNQEITTLIKRNGFRFWGNRTTD
                     THDYLFEVYTRTAQILADSIAEAQFEAVDEPLTPANVKDVVNGINGKLSALVTAGRLIG
                     GECWFDIQDNPTTGLRQGQVRVRYKYTPVPPLEDLTLYQTFTDDYFDSAFSSLGGV"
     CDS             33313..34452
                     /codon_start=1
                     /product="Gene D protein"
                     /label=Gene D protein
                     /db_xref="SEED:fig|6666666.356858.peg.47"
                     /translation="MAITELADSLITTAKRYDDALTEAVKSPAFSITLGGKSLKELSDR
                     LISLSLTDNRGFEADQLTLSIDDSDGRVELPPRGAQIALSIGWQGEALTYKGLYTVDEI
                     SHEGPPDVLGVTARSADFREEFNVKREVSWHDVTVERVVSAIAHRYGMKVQISDMLMNI
                     EIDHADQTEESDMSFLTRMAEQLGAIATIKNGTLLFILPGGGVTASGKALPSASITRSS
                     GDGHRFRIADRDAYTGVRAYWLDLKFGKKKKVSVKRRRTKPKPKKEKSSSREGDYITGA
                     EGNVFVLRKTYQNEEVAKRAAAAKWRQLQRGAAEFSITLARGRAELYPEMHLTVSGFKP
                     DIDNQDWIIARVEHVIDGNGFTTRLELEAKIPDWIAESE"
     CDS             34516..34737
                     /codon_start=1
                     /product="hypothetical protein"
                     /label=hypothetical protein
                     /db_xref="SEED:fig|6666666.356858.peg.48"
                     /translation="MARTRTSRRLSDITIRQYHQCQNLECSETFTTLNTVERRVSKRTR
                     EDPLPPDFIPQDAFPASHYGRDQLNLAL"
     CDS             complement(34785..34898)
                     /codon_start=1
                     /product="hypothetical protein"
                     /label=hypothetical protein
                     /db_xref="SEED:fig|6666666.356858.peg.49"
                     /translation="MPVIWQVAAKWQQSGSTRFSGTKKTVFNQSPLLTVVE"
     tRNA            complement(34968..35051)
                     /product="tRNA-Leu-TAA"
                     /note="/transl_table=11"
                     /db_xref="SEED:fig|6666666.356858.rna.1"
     tRNA            complement(35063..35133)
                     /product="tRNA-Cys-GCA"
                     /note="/transl_table=11"
                     /db_xref="SEED:fig|6666666.356858.rna.2"
     tRNA            complement(35165..35237)
                     /product="tRNA-Gly-GCC"
                     /note="/transl_table=11"
                     /db_xref="SEED:fig|6666666.356858.rna.3"
     CDS             complement(35379..35927)
                     /codon_start=1
                     /product="CDP-diacylglycerol--glycerol-3-phosphate 
                     3-phosphatidyltransferase (EC 2.7.8.5)"
                     /EC_number="2.7.8.5"
                     /label=CDP-diacylglycerol--glycerol-3-phosphate 3-phos
                     /db_xref="SEED:fig|6666666.356858.peg.50"
                     /db_xref="GO:0008444"
                     /translation="MRFNIPTWLTLFRVVLIPFFVLAFYLPFSWAPMVCAGIFVFAAVT
                     DWFDGFLARLWKQTTRFGAFLDPVADKVMVAVALVLVCEHYHSWWITLPAATMIAREII
                     ISALREWMAELGKRSSVAVSWIGKIKTTAQMVSLVGLLWRPEPMVEAAGVVALYVAAVL
                     TFWSMFQYLSAAWRDLLEH"
     CDS             complement(35985..37817)
                     /codon_start=1
                     /product="Excinuclease ABC subunit C"
                     /label=Excinuclease ABC subunit C
                     /db_xref="SEED:fig|6666666.356858.peg.51"
                     /db_xref="GO:0003677"
                     /db_xref="GO:0004518"
                     /db_xref="GO:0005622"
                     /db_xref="GO:0006281"
                     /db_xref="GO:0006289"
                     /translation="MTDCFDAQAFLKTVTSQPGVYRMYDASDTVIYVGKAKDLKKRLSS
                     YFRTHVASRKTEALVKSIRQIDVTITHTETEALLLEHNYIKRYQPRYNVLLRDDKSYPM
                     IFLSGDTHPRLSVHRGAKHAKGEYFGPFPNGNAVRETLMLLQKLFPIRQCENSVYRNRS
                     RPCLQYQIGRCLGPCVSGLVSEEEYQQQVDYVRLFLSGKDQQVLTRLIERMEAASHALK
                     FEEAARIRDQIQAVRRVTEKQFVSGDGDDLDVIGVAFDAGMACVHVLFIRQGKILGSRS
                     YFPKVPGGTELAEVVQTFVGQFYLQGSVSRTLPSDILLDFSLPEHQLLAESLTEQAGRK
                     IQIQTRPRGDRARYLKLARTNAHTALTTKLSQQSTIQQRLTALASVLGIEKINRMECFD
                     ISHTMGEQTVASCVVFNAEGPLRSEYRRYNITGITPGDDYAAMNQVLRRRYDKAIDESK
                     IPDVIVIDGGKGQLAQARDVFASLHVTWDTSRPVLLGVAKGSDRKAGLETLFFEATGEG
                     IALPSDSPALHVIQHIRDDSHNHAISGHRKQRAKVKSTSSLETIEGVGPKRRQMLLKYM
                     GGLQPLMNASVEDIANVPGISHALAEKIFHALKH"
ORIGIN
        1 atgaatgaaa ctgataaaag cattgtctcc ctatttatta tcggcacgct gattgccgtc
       61 ggcaaagtac tggcaagcag caaacccatt acactccgac tgttcgtagg gcgtgtgatg
      121 ctgggaggat tcgtctcgat gatggcgggt atcgcactgg ttcaattccc cgacctgtca
      181 ccggttgcca ttaacggcat tggcgcagca cttggcatcg ccggttacca ggcgattgaa
      241 ttgcttattc aacgccgtgt tcaacaactg agcgaacaga ccaaaccgga ggaaaatgac
      301 gatgcccact aactcaccca atctgaccgc atttctggat atgttggcat tttccgaagg
      361 gaccgcaacg cacccactta ctcgtaatcg cggctacgat gtcattgtta ccggcattga
      421 tggtaaaccg gagatcttca tcaactacca tgatcacccg tttgctaacg gccgcccggg
      481 aaaaatcttc aacaaacaag ggcaacgctc tactgcagct gggcgctatc aacagctcta
      541 ccgctactgg ccggcataca aggcgctgtt aaagctgccg gatttcgggc ccgattcaca
      601 agatacgctg gctattcagt taatcaggga acagcgtgct ctcgacgaca tcgcgcaggg
      661 acaggtcgcc agcgccatca ctcggtgtag caacatctgg gcttcattac caggggctgg
      721 ctatggccaa cgcgaacata gtatagaccg cctccttacc gcctatcagc aagcaggagg
      781 agaactggca tgaaaagcag catgatcatt gctgccatca taatgctact tagcgctgga
      841 atcggtgtgc agtcctggcg gctgcacacc aaccggcagt tgacagagca gcaggcacaa
      901 acactgtcgt tgcaacaaac agcactgaat gaaaaatcta gccagttaac agctctgtct
      961 gagcaggctg aacgtagcaa cattgagcag gcacgtttac gcgatatggc cgcagacacc
     1021 caggttgctc tttccgagag acaaaaaatg atagtgagat tacaacatga aaatgaagcg
     1081 cttaaacgct gggctgattc tgagctgcct gctgatatta tccggttgcg ccagcgcccc
     1141 gccctctcag gtggtcgtgc ttaccgtgaa tggttgtccc agactgactc cctgccggtt
     1201 tccacccgcc aacccacaaa ccaacggtga attaaacact caactggatg agactgaagc
     1261 cgcactggca acctgtgccg accaggtgga cgcaatcatc gagtgccagg caaaaagcaa
     1321 tgctgcagat gcctccgcga cgctacacac ggttcaatgg gccaaggcac cgaaagagcc
     1381 gtagtaaagc tccattgtta ggtggctgat tgaaggccac cttttttgta tctgaaaagc
     1441 ggatgccgcc attttgtcgc cacttgccaa attacaggca caaaaaaacc gccttgtggc
     1501 ggtcatgttc ttttaatcat tttcttatat tacaagacgt tatcgcatgg tgcccagagc
     1561 gggacttgaa cccgcacagc gcgaacgccg agggatttta aaaagttaat gcccgctttt
     1621 tatatcatag agttacgtta attcaatacg ttagcagtat tcaattcagg ttaatgcgag
     1681 ctaatgcgga aatctgctgc catcggttta acgtggcagc gccccatgat tattcatctg
     1741 tggttaaaga atcaaacggg ttgagggtca cggccgcatc cagatgatca ggcgcgaaat
     1801 gcgcatagcg catggtcatc gtgatagagc tatggcccag tatctgctgc aacaccagaa
     1861 tattgccgcc gcgcatcatg aagtggctgg caaagctgtg cctgagaacg tgggtcaact
     1921 gcccttctgg taattcaata tgcgctttct ttaaggcgtg cttaaatgcc tcatacgctg
     1981 gtttgaagag ttggccgcgc cgcttgggca acaaggcgtg cattctttca gaaataggaa
     2041 tggttcggtt tttcttccct ttggttttaa cgaaagtgat cctaccggga aggatttgcg
     2101 attgtttcag ggtctgggcc tcaccccaac gcgcccccgt cgccaggcac aagcgaacga
     2161 tgataccgag atctttattc tctgattcat cacaggcagc aagcaggcgc ttaatttcat
     2221 ccgggtacaa aaaagccagt tcctgatcgc cttccttaaa ctggcgtatg ccatccagtg
     2281 ggttttcttt ttcccactcc cccatgcgct ttagctcaga gaacacggcc cgcaggtagg
     2341 aatattcgcg gttcactgtg gcctctttga tggccgtctt cccttttggg ttccattcac
     2401 cttttaaccg gcgctcgcgg taaaccgcga acatattttt atcaacgtct atcgcaaagg
     2461 gattacccaa ccgatcacag atcgccatca gtttagcgta gcggtcttca cctgactcca
     2521 gcgtctggcc gtgcatgtcg taccagcgct ggatcaggtc ttgtagcgtt gtgctgttgg
     2581 tttcggtcga tatccctttt ttctccgcca tcaggcggcg ctcatacgcg agtgcctcac
     2641 ctctggtagc aaattgttta cgaacgcgct gaccatcacg cccatagggg aagcattggc
     2701 aaagccattt gccagaagat aattttgata cagacatgaa ttggttttat gaaaaaataa
     2761 acttagccgc agttaacatg acgcccatcg caacaaaaat tgccccaaca agccatttgg
     2821 tttgacctga aatggctttt tcgatatctg ttcgaaccac ttgaatttct gttctaatcg
     2881 actgtgtttc agttttggtt tctgttttaa gagactgaat atcggttctg agcgattgaa
     2941 tctcgctttg aaactcggta ttgacagtct gaaggtcagc ttttgtggca aaactctgaa
     3001 ggtcagcttt tgttgcagta ttttgaaggt cagctcttcg ttgcaaagtg tccagagcgt
     3061 tctttaagaa cggcaatatc ttgttttatc gtggatatgt caacattggc cgctttaaaa
     3121 tcgaccttaa tgtcagtgac atcacgtttg atgtgctcaa catcggactc tagtttagca
     3181 acccttgtct ctaacatacc gtcgcctcca ccattaccgc cgttgctgtt atctttcatt
     3241 ctatcagcaa agggcagttg tgtatcatga agttgcacta ccttgttatc attgctcatc
     3301 gtcaacagcc ttgtttttat cttcgatcca ctggagaacg ggattgactc gataggaact
     3361 tacatgacca cagttcatgc aagaaactcg atattcacaa ttagaaggtc ttgggtatgc
     3421 atttgggtca atatagtgat aggtgacata acgtttgata gttttcatta attcttctat
     3481 cggtatttcc tcaaagctat caggcaagtc agcgggatta aatgatccac tttcaggaac
     3541 agataatttc gtgtacccgc acgacaaaca atgctgtgca gcgccttttt cggcaaggaa
     3601 atctgcaaac agctttggtg taacctgctt tagacgtttt tttaatttat cttccgcaag
     3661 ctctttttgg gctttgcctt gtgaaagcaa ctgttctaac ccaatattct cttcatcgct
     3721 gttattcacg attattcctc tcttaagcca aaacaagcgg aaaatgtagt tgatgaataa
     3781 gacgagaggt aattttattc ataacagcct catttaattt aaacaagtta tgattatcga
     3841 aacagaaaaa caccaaaaac catcccggat acaaaaacag cgccaaagac ggtcggattt
     3901 gctaatagta cctcctgcca gctctgacgc gcgttaggtt cggtctgttc aggaacggtc
     3961 gaacactgac gatcatccaa ccatgaaagc gcctgctgga gctgcgatcg ggtcagctca
     4021 gttaatcgtc cagtaccaaa atgaatatgg cagtaatgaa ttaattgctg ccgctgatct
     4081 acctgctggg tattcttcaa cagcagatga accagcgcat tactggcatc cttttcccgg
     4141 tatctgtcgc gcaatgcctg aagataactg accgccgttt gatactggtt gaccgtcata
     4201 tcctcaatgc ttttgacgcc aatctcagca tggacgcgct gccacactga aaaaccctct
     4261 tcatagccgc tgtcagcaat ttcttttacc agttggttca actgcttacg ctgcgcggga
     4321 accagtgggc gtttttcttc attggccgcc ggaatggcga tattgatctt atcaactgtg
     4381 atgctgcttt cgtaaaaatc ccgcccggct atccggtttt catttccatg agattcagca
     4441 ctcattcctt acgcaatccc tttagttttt agttaactgt tcgccagtga tcaactggcg
     4501 aatattactg aaaaacaatc aattaatatt agtccacttc attaatatga gaagcatggc
     4561 cgctgtttca ctgaccgtct gattagcgaa tagtttttta tttttagcaa catttggatc
     4621 gggcttaaaa gcctgatcaa gctggtctgc tagttttaat gcatatggct tgaagtcatc
     4681 aattgattta agactactta cgatcgaagg agctaacctt ttcttctcat acatcgaagc
     4741 aaggatatct gcacaggtag caaccttgtt atctctggat gctttttgcc attcaagagc
     4801 tgttgcgtta tgcagagtac cgccttgata ccaagacgtt gcttgggctg tactcacaaa
     4861 taccaatccc aaaagaatgg cggcaaaaaa ataaaaccta ctaagaataa tttttcttcc
     4921 tgtcattttt gacttcccag attgtcaaat ggatcatttc ttactttcgt gatagtccct
     4981 accagcaaca cgctgaccac taccagttac atttatcgtc cctgctgatg ccgaactacc
     5041 tgccgtcaat gctgccagtg cagcggcttt aacggctagt ggtgctgcac gatagatttt
     5101 taccagttcc gattcatcat tagatatgtc accaagatca ggcacccgct ttccggtaag
     5161 gatatacgaa atatccatac cgtaccgagc actgagaaga gctaaagtca ctccgtctgg
     5221 agcagtttct cctctctcat acttgcccca agtccttgtt gtcgtgccca gttcttcggc
     5281 aatcgcgctt tgactcttac caatcgtttc ccgctcttgg cgcaaacgct ctccgataag
     5341 gaataaaaat tcctctttca atgttgacat aggaagtttt cttcactaga ttgtgttgaa
     5401 caggaactta gtggatcaca acataccatt atgacacaag aaaatcatga tcagcggtcg
     5461 cgtttaccgc gagggattgc atcacgcagc cctactccca tgaggctttc cgacgatgaa
     5521 cgcgccagac tggccgcgtt ggctgaaaaa gaaagccgtt ccctctccag catggcgaga
     5581 ctggtttttc tccgggggct ggagtcgttt agcgctgaag gataggcgat atgagtaaag
     5641 gactaaccat caatatcaat gtcccgacgc cgtatgtttc tctcaggaaa tactcagaat
     5701 taaccggtat cccctttgaa acttgtcggg gcatggtaaa aagcggaaaa attattatcc
     5761 ggccaaaaga aaaagcaaac gagaaagtag aggtgaatct cgttgccatg ctgcgcgatg
     5821 ccattgccag cagtgaaata taaaggagcc acatggagaa taaaaaatca ggccaccaat
     5881 acgccattac acaattaagc aaacacacaa atgtatatcg tggcttctca attattaaat
     5941 gcccgcggac aacattaaac ccgattatcc gatatcgtgt tagtcaggct gggcagtctt
     6001 acggtttatt tgatgcactg acattagcca ccggttatat cgataacctt tacacagcga
     6061 ggcgataata tgatttccat agctcgtcta ttaacttctc agtcaccatc accagtaatc
     6121 cctaatcagg gtaaaggctg gctggaacta ccaaacggcc aacgcgttaa gccgtccgtt
     6181 aatcaggtct atttcgcacc ctggagccaa aagccctaca tgccagcgcc taagcaaaag
     6241 cgccgctggt tttcccgcct catgggtatt gcggcttagc gtcatggcta ataccgaacc
     6301 cgctcgcgcc attccgctga gtatcgcgga aagaacagac gggctaaacc acatagccat
     6361 gctgcgaggg aaacacttca agacaaacag tgagaaagaa atgtgccgct ttattgatga
     6421 tatgcgggac aagattgatg acgattacca taagaatatg cgcgtactgt cggcaatatt
     6481 tgaattagcg gatattgata aggagcggca tcacttgaaa tttaatgaac tgacaactga
     6541 cgaaaaagaa aggctgatta aagcaatgaa taagctccgc gcagttgtga gtttattccc
     6601 caaaaactta attcttccac tgtaataaaa aacccaattt taggcgtaaa cccgccgggc
     6661 tttctattac ctaaaaaaag gaaaccacaa tgaaaaatgc cgaagtaaaa accatgactg
     6721 tcgccaatga tggcgcattg gtcgagctgc tgaaaaaggc cagattggag gaacgcaaag
     6781 accagcattt gtctttctca ctgcgtcttg ctgcgctggc tgtccgcgct caacaacgcg
     6841 acctttccgc cgccgaaatg gtggaactga tacgccagga gtccgaacgt tttgagcgct
     6901 ccgctcagga gctgagctga tggactcgat tgacatggct caggagcgcg aagcgttcat
     6961 ccgcgaaaca caaatccaga aggcccggca acagtcgggc tgtgccgttt ctgcattcgt
     7021 ctgtgaaagc tgtgatgcac ctatccccga agcccgccgc gaggccgttc cgggtgtgcg
     7081 tctgtgcgtg tactgccagg gcgatgctga actgaaaaac aaacactatc ggggtgcgtt
     7141 atgagcatta ttgccacacc gctgaaatgg gtcggcagca aagcccgcgt gatggatatc
     7201 ctgcgcgaac atttaccagc tggtgatcgt ttggttgagc cgttcgccgg gtcgtgttca
     7261 gtcatgatga ataccgatta cccggaatac ctgattgctg atatcaaccc tgacctgatt
     7321 aacctgtatc aggtcatcaa agaggatgtg aaggagttta ttgatactgc tgaaggtctg
     7381 tttcgcacag cgaatacagc cgaaagttat taccgtttcc gtcaggtatt taaccgcagc
     7441 aaagagaatc gcaccacctc agcagcactg tttctttatc tgaaccgaca cggttaccgg
     7501 ggcgtttgtc gctataaccg cgccggtggg tttaacgttc cttacgggca ttatgcatcg
     7561 ccttattttc cattggccga gattcaggca tttgccgaaa aagcccgccg tgcaaaattc
     7621 atctgcgccg catttggcga aacattgcaa ctgatccgcc ccggtgatgt ggtgtactgc
     7681 gatccgccgt atatcccgca aacgccaacg gccagcttca ccagttatca cactgatggt
     7741 ttcacccata acgatcagta tgacctgtgc agcgcgttat cacgcctggc cgaacgtggg
     7801 atacctgtca tcgcatccaa tagcgacacc caccacgcac acagccttta ccacaggttt
     7861 gatatctgcc gtttcaccgc gccgcgtagc gtcggcgttg cggctggtga gagcaagcag
     7921 gccggggaaa tcattgctaa gcgtctgccg attcctgctg cccaaagcct gtcgaaagtt
     7981 tgcgacgggt gcggctatga aggtggtggg cactgccctg actgtgggcc agttatgggt
     8041 gatgccacct atcaggaaat ggtggcatcc ggcgcgttga acgcggagcc gttctgaatg
     8101 tctgaacagt gggcctaccc ttggaacgct ccacgccctg cgatctccgc accgccgggc
     8161 gtggctgatc tccgtccctc tctattcgtt accgatgcgg aaccgcaccc caccgtcaca
     8221 cggcatctga gccggatggt taaacgcgct ttggcagcgc caggtgatga ccggaatctt
     8281 aatcaagtcg tagcacagtt ggagcaccgg gagccgaacg gcacccagtt gcttatccgt
     8341 cgcggtctgg cggaaatagt acgccgggat catcagaaaa cgctaagtga ctggatgaaa
     8401 acaccggaag gcgtggaagc ccgcttgcac gaacaaccgt tttttatccg tgacgtttac
     8461 cgccaaaaaa ttgaatggct acgcgcaaac cgcgagccgc gacacatcag cgcctttttc
     8521 atgggaaccg tgaaaaaagc cctgctgcgt ctggatgctg tgcgcgcgca gcaaggtgtg
     8581 cgtggtggtt ttacatcgga actggcggcc tattgggggc cgcgttgggc gcatctggcc
     8641 gggtttacaa agcatgaggt gatcaatgcc gcgcatactc ttgcggccgc catcgccgaa
     8701 atgtttgaaa ccgagtgcgg ccacacatcg ccggaagaca tgactgatga tgaaattcag
     8761 tggctatatc gccatctggg gcgcgaactg ctggcattac gtgtaacacc accgtgctgg
     8821 gggttggtta tcggtgatga acaaacccgg caccgcatct attccgccat tttacgcatc
     8881 acttcacctg aatggtgggg gcggaaactg tggcgactgc gttgtgaatg gcgggaaaat
     8941 cagtttcgcg ccatcggcgt gatccacaaa aaacgaatgc cgtatgtcag ccttgatgcc
     9001 ctcaaccagt ggcaagagca acgccgcaaa aatcgtgttt tcatccagac tcatgaactg
     9061 gttgatgaag atggcaacat cacatcactg gaaaacatgg tgtacggcag tatcagtaat
     9121 ccggctatcc gtcgtcatga gctgatgacc cgcatggccg gtgttgaaat ggtggcaatc
     9181 gcgcggggtg atgaaggtgt tttccttact atcacctgcc cgtcgcgtta ccacgctaac
     9241 atccagaacg gtcatcaaaa ccctaaatgg gatcatgctt ctcctcgtca agggcagcgg
     9301 tatttgtgcc gcacctgggc gcgtgccatg tctgcgttga atcgtcgcgg cttgcgccct
     9361 tatggctttc gcgttgccga gccgcaccac gatgctaccc cgcactggca tgtgttgctg
     9421 tttatgccac ctgccgacag aaaggccatc accgatatct tgcgagagta ttttattgct
     9481 gaagaccgtg cggagctggg gcgcaacacc ggcgcacgat tcaaggctaa aaagctcgat
     9541 ccaagaaaag gcagcgctac ggcttacgtg gcgaagtaca tcagtaaaaa tatcgacggt
     9601 tacgcgctgg atggtgagct ggataacgaa accggcaagc cattacgcga aacagcaaag
     9661 tttgcaatgg cctgggcgtc acagcataaa atccgacagt ttcagccgtt tggtctgccg
     9721 ccggtaacgg tatggcgtga actgcgtcgc ctggcaaacc aacttaccgc agcccagaaa
     9781 gaaaacggca cgtttaaacg cggggccgcg cagcttgctg acccggcaat ggatgccgtg
     9841 ctggcatcgg ctgacgccgg ttgttttgcc acatacatcg aaaagcaagg tggcgtgttg
     9901 atcccacgcg agcgctacac cgtgcgcatt gcctatgaag atgctgacga acagaacacc
     9961 tacggcgaga taccggaaaa aatcttcggt gtgttctctc cacgtttggg ggcgatatcc
    10021 cgtatctgca cccggttaat caagtggaaa atccgaaaga agcagtccgc tgacgatggt
    10081 gccagcatta gcaccgggag tggtttggcc gttacgtcgc caaccggcga cgcttggagt
    10141 tctgtcaata actctacggg cgatgaaaaa acagccattc cggcaggtat aggcggggat
    10201 gactatggta gctgtgaact gtcagatgga gagcctggcg atacatccgc tcaaaccttc
    10261 gccgacttcg agcgcatgac agacccggaa cgccgggcgc tgctgtccag gttgcgaact
    10321 caaccgccgg atcggcggaa taatcaacac tcgtccacta ctcaacggaa caaatctgct
    10381 gaaaaacagg tggttggcaa actgtcggac gagtggcgtg ccagtattgc cgatttcgcc
    10441 cgctcaatcg gctgggatat tagcaatatc gagatccagc ggctggcgtt ggggcatacg
    10501 ctcgcctttt ctggtcagat atacgtttca cgatctgacg gatgcctgta ccgcgttcgg
    10561 ccagaacggc aaccgggaaa tattgccgct actgttagta actgggtaag gagattgcgg
    10621 acagcaggtt cccggtgact gatggcaata ataattgact ccttctgtgc tatagcatgg
    10681 tcttttatgt cttcataata tcgccgacag ataagtgatg ttaactagta cttaattggg
    10741 taatgacgtt tattcagcat gtataatcaa ctcgattgag ttacacgatt atcgttacat
    10801 cgaaaatcct gattattttc attgtgttac agtgaatgaa accaagccag aacatagatt
    10861 taaaattatt attaaaatta taattaacaa tgtgaatcac tccacaaatt ataacagcct
    10921 caactttaaa ttgaataaaa aataaatttg atctctactt ctcagttgtc ccgacttttt
    10981 atctcggaga cagttccctt aagaataaat tagccagcta atgaatagcg aaaaaacgag
    11041 atgatataaa atgagaatca acaatattta tataaagaac tttagaaaat taaagaattg
    11101 cgaaataaaa ttcagagaca ccacatttct tataggtgcg aataatgcag gaaaatccag
    11161 tgtatttaaa gcactagatt atttacacaa gaatactaat gtcactcttg aagattatgc
    11221 caagcattat gacgctgaaa ctgatgatat tataagagaa gatgaaatag agataattgg
    11281 tgaatatcac aacgtcccag aagaggcaaa taactggatt ggatttaaag gaagggtgat
    11341 aagaaataac gaaccattac cgggagaaac accttataaa ataattttta gaaaggtgtg
    11401 gaaaataaac acaacaaagc cagaagttta tttaaaagaa tatacaaaat ctcgtagtga
    11461 aaaatacaga tcagcaaaca aaccatcaga tttagttggt gacgaatttg atataaacta
    11521 tttaacggaa tattttggaa cagaaaacat tgagaagtct ttaacaggaa aagaaaataa
    11581 agacaaaatg aatgaacttc ctcaactatg ggatgttgac acaacaacag aagctcaatg
    11641 gataaaaaac ccaggaggaa ttcccggaaa tgttttatca agactaccaa aagtagtaat
    11701 cattcctgct gaatcatgca ttactgaact aactagtcag aatggtgctt tgctgaatac
    11761 gcttacagat ctcttcaact cagtaagacg gagttctcca aattatgcac aggcacagca
    11821 gtatttggct caattagcca gagaaatgaa tccacaagac actgaaactg aattcggtag
    11881 attaatgaac gagctaaata atatggctca caccctattc ccaaatacat caatacatgt
    11941 atctgcaaat cttgatgatg cagataaagt tataaaacca atatttgatg ttgaaatgga
    12001 gagcaacgtt aaaactgccg taagctatca aggccatggc atgataagga ctacagcctt
    12061 tcaacttctt agatttgctc aagagtttgt gaatagaaca ttagattatc caagagatac
    12121 gattctttgc tttgaagaac ctgaattatt tttgcatccg gcggcatcaa atcaactaag
    12181 agatgcgcta tacaatttcg taggagaaaa caaccagatt attgcaacaa cacattcacc
    12241 atacatgata aatttaggct cagaaaaaag tataagcctt acaaaattct ctatcgatga
    12301 gagtaacttt tccgttacaa attcattcaa tcttgagaag gcattcattg atctacaaag
    12361 cgatgagaag caaaacttaa aaatgctact aaaaatagat gactatattg caagaatatt
    12421 tttcacaaaa aaatgtatat ttgtagaggg agatacagag gaggttgtta taaaagaaac
    12481 aatcaaaaga ctttcatcta aggataaagc cattgttatt ggaaattgtg aattgcttcg
    12541 tgccagaggg aaagcagttt taatatccat cgcaaaatat ttaaatgcac tagggatcga
    12601 ttatattttt atgcatgata gagaccaagg aactgaaagg gcagaagcaa tcaacccgct
    12661 aatattagca gaaacaggtg aaaaccgaag agttatgata gaagaatgca ttgaaaacat
    12721 attaggatat gatccgccca gtaatgaaaa accttttaaa gcatataaat atatagagga
    12781 atcatggcca gataattttg atcaattacc agacaactgg aaaagaatat ttatcaaatt
    12841 ataccaccct tacttgaacc atctttctcc acaagaaaga ccacaggata tataatcaca
    12901 accgatgcac aggatgtaga aagtcctgat ggtatttttc ctcccgcgcc aactccggcg
    12961 cggtttttcc tacttacacg actgcgtaag aaacaataac cttcatttgt agcgcaacaa
    13021 gctcccttca cgcactgtgt gttcaacaac gaatcataaa atcaacatct gggattataa
    13081 aaataactct gataactcta taatattgca ttctggagtt atcagggtta ttattgcttc
    13141 atcgcagggc tacggggttt aaggatggac agcaggacgt taatagcaga aatcaaggcc
    13201 gatgggtggg agttagtaag ggttaacggc agtcatcatc attttaccca cccaacaaaa
    13261 ccgggattgg tcaccatccc acacccgaag aaggatttac cgataggtac ggtaaaaagc
    13321 atcaggaaac aagcggggat atgatccctg cttactcgaa gaggctgaat tatgttttat
    13381 ccaattgcaa ttgaagcggg cgacgatact catgcatacg gcgtgacagt gccggatctg
    13441 ccgggctgtt tctccgcagg tgatacgctt gatgaggcca tcgccaatgc caaagaagcg
    13501 atcaccggcc atattgagct gctgatcgag atgggccagg atattcctgc tgtgtcatcc
    13561 gtcggaacgc tggcgaaagc accggagtac accggttaca cctgggctgt tgttgatatc
    13621 gatgtcaccc ggctgatggg tggggcggaa aaaattaacg tcacgttgcc gaagtctctg
    13681 attgaccgta ttgaccgctg cgtagcgagt aacccggaat ttaagagccg ctcagggttc
    13741 cttgctcagg cagcgttaga gcggatttca tccattcgct aaccttctct gaaacctgct
    13801 tcggcaggtt ttttttaccc caaattcgcc gcacaaaccc gcacaatttt gcacaatttt
    13861 tttgatgcta tttttcccct ttccgcccgg tacgcacgcg cgccgggccg gtttctgcac
    13921 ttgcacaaaa aatgaagcga gagtcgcgcg caggtgacgg gggaacagcc cccgcgatgg
    13981 ggggtaggta gggatcccct ttgatgtgtc aaatctggca catttcccgg cctgctgcgt
    14041 gcgtattttc gttcgggaga cgcgacgcgg catccagtga gagcgcccga tggcgtagcg
    14101 ctgatgcggt tttatgtggg tgggaaatgg tggcgttagc cgttgatctg aaaagagatt
    14161 gtacgcgggt gacgtgaaag tttttgaata aaaaccgccg cgtgagtgcg acggcagtgg
    14221 cgggatatca ctcggttttc aacagggcgt aaggattaaa gcggatcacc tccatcccca
    14281 gccagtcatt cacatgcttc agcgcttcca tcaccggcat cagttcgttg atagcgaaca
    14341 cccgcgcggc tttctccaca tcgccaaaag aaccgttgcc ttccggcatg gcgcccatca
    14401 gttgcggcgg tacgcggtgc gccgcgagga tgtcgtcacg cgtcactgat ttgatattca
    14461 ggaattcatc tttggcagat atctggctga agggaataat ctgcactcct ttttcaccgc
    14521 cgcccggcgc gtgtaacagc aggtttttaa acgcgccttt gccacgtgcc tccttcagcg
    14581 ttttcttcac gctctccata ctctcgttat ccacctgcga tgcaccgata tagataatgc
    14641 acccggcgtg cgaaccgttg tcatagtaga gcttgcggaa catatcggca gagtgtgaca
    14701 ggctggccga cagcagcgcg cccatgtatt ccggcatacc gtatatctcc tggtgaatat
    14761 ccgggttgat gacgtggcac acgctgtcgg tagcaaacgt gtgttcatcc ttccactgcc
    14821 ggataaacca ataggtattc agatcgctgc cgcgccgggt gtacttggct ggaacgtgac
    14881 gcaggtccag caggccgccc agccggttga cccggcgctc aaggtaaccg ttgccgaaaa
    14941 caaaccagtc gagcacgaag gcggagaacg cctgacgcga caatagcggg tgcgggataa
    15001 agcacccggt cagcgcattg cgtttgaagt acagcgcgga ctggtgccat gacgcactac
    15061 caaacgcgcg agccagcccg taccaatcca ccggggtgtc gtaataacgg ccattgtcgg
    15121 cgcaatacat gttatccagc aggtcatggc catccctgac cggatagggg ccatcaaagg
    15181 taaacgcgct cagccctgga tcgcttttca gggccgccgc catatccggc tgactggcgg
    15241 taaccgcccg gtgtgtgccg gttttatctt ttcttttcat cagaactcca tcgcaaagcc
    15301 accgccgccc tgctcctggc cgagtggttc attgatgacg gccagcatgg ttgcccaggc
    15361 cagatcgcca tgattagagc cgcgtgcgcg gtcggtgtcg taagtcatga tgccgcctgg
    15421 cgtcttgacg cgccgcacgg cgttgaacgc gttgatcagt gcctgctcgc tgcggtcgta
    15481 ttcccagcga ccagcacgaa tgacctgaag cattttcagt actagggcgc gtttggatga
    15541 caccgacatc aggaagcaca ccgccgtcgg gaagaatttc ttcacaatct ggtagaccgc
    15601 ttcgccgatg ccggtgccat cgatggcgat atgctgcacg ttgtatttga aggtcagcgc
    15661 ctcgatcact ttcgcctgct cttcgaactc caggccacgt atctgctggg tttcgatggt
    15721 gcggaacttg ccgcccgcca ccagtggcgg taccaccacc gagatcgcgc cgctgtcgcc
    15781 gttaccgcta ctgccgttgg cgtcataacc aatccagacg ccgcgatcag ccatcgggcg
    15841 tgatgcgaaa ggtttccagt ccggccactc gtcgtaaccg tcggcaccgc agctaaacaa
    15901 caggttaagg ttaaaggcgg actcaccatc acggacgaac tcgcagccgt acaggttgtt
    15961 gtattcatcc gggctgtttt cgtcgcggat ttcttccagg tcggtgtatt cccagccgtg
    16021 atcgatgaca tcctgtagcg tcacaatctg acgccaggtt ttatccgggc atagcaaacc
    16081 gctattgagt gctttccatg acacatcaaa cgcgaccttt tgcgccttac tgcgcttctc
    16141 attccagcgt gcgcctgtcc agaacgggta ggcttcatgg gtttcactcg atggggtgga
    16201 aaagtaggtg cgcgtcaacc ccttcagggt cgccatcgcc ccggccacct tgcgcaagtt
    16261 ggcaaagtta ctgacccaga aaaattcatc gaaatacagg ttgccggtgt aggactgtgc
    16321 cgtcgcggca gacgtcccca gaaaatgcag ctcagccccg ttgctcagga cgattttgtc
    16381 gccgcctttt agttcgacgt ccacctcttc cgccaccttc tggataaagc cccggaactg
    16441 gtgcgcctga cggcgcgagg cagaaagaaa aatctggtgg cgctgatagg ggtaagccac
    16501 gtcatcacgc agcgcccgca ataacgcttc acgggcaaaa taccaggtgg caccaatctg
    16561 gcgtgacttc aggatcatgc gatttcggtg gtggcgttgc tcataccagc cgttttgatg
    16621 ccaggccagt gagtcgagaa tgttggttcg caacgcggta atctgttcgt cagaaaagtg
    16681 atttttcacc ttgcgctggc ggggtttctt gccgcctgcg gcattgcccg gctggccatc
    16741 attcagcgtt ttcaactgcc gggtcagcgc gtccatttcc ttcaggtcgc caccggtttt
    16801 agtcggcttc tgggccaact ggcataaccg tgcatcgata gaatgcgtca cgcgctggat
    16861 aggcggcgtt tcgtcccatt cgtcgcgctt tttccaggcg tacaccgtgt tttgattaat
    16921 ccccatcagg cgcgaaattt ccgctggcgg gtaaccctgc cagtaaagct gttttgctcg
    16981 ctgccgtaca aatgcgtcct gaatcatgcg cggtttcccc ctttgccggg aagattaccc
    17041 cgcgcgcgat ccgcctttcg ctcactttcg gctctggccc accgccgaca acaaaaccgc
    17101 gttgagacag ggagttaggc tctgcaatca tgatgtcaca gacaccacag gacaggacta
    17161 caggcatgag cggtacagct aaaccgaccc gcaaaaaatt ccgggttgcc gtctccggct
    17221 ccaccgttga cgggcgtgaa atcgggcgcg accacctcta tgcaatggcg gaaagctaca
    17281 acccgcaggt atacggtgcc cgcgttaacg ttgagcacat tctttccccc tatccgggca
    17341 gtgatttcag tgcgatgggt gatgttattg cgctgagcgc ggaagacatc accgacggcc
    17401 cgttaaaagg ccgtgccgcg ttgtatgcgg aaatcgaacc caccgagcga atgaagcagc
    17461 tcaccggcga agggaagaag atttattcca gtatcgaaat cgatccgcag tttgccgcga
    17521 ccggcaaacc gtatctgcgc ggcctggcga tgacggatac cccggccagc ctgggcaccg
    17581 atcgcctgaa attcgccgca caacaacggg cacaggtgca ggcattcaac aatctgcccg
    17641 gtgagccggt catgttcacc gaagcgatgg aagcggagct ggtcgagctg tccgaacagc
    17701 gcagcgacga ggggaagcaa tggttttccc gcgtgatggg gattatcggc aaaggccgta
    17761 aatcggacag tgagcagttt aaccaggtgc gtgaggcggt ggaaaacgtt gcccagtctc
    17821 atgctgacct gctggacagt ttcaacacgc tgaaaaccca acagcagcag aacagccgca
    17881 ctatccagac gctgaccagc gagttggctg cgctcacgca gaagctggcg acgcaggata
    17941 acagttacag ccagcgtccg gcggccagcg gcggcaacag cggcgcgcaa ctggctgact
    18001 tttaagtacc gttaagcgag acaagcgaac atggaaaaca cgacccgtaa tctttttgat
    18061 cagtatattt cacgtcaggc gcagcttaac ggggtgcagc cgaatgccgt ggcgatgacc
    18121 ttcagcgttg aaccggccat ccagcagcgt atggagcagg ccgcacagga aggtgatgaa
    18181 ttcctgaaac agattaacgt gtttggtgtg aaagctcagg aaggtcagaa aatcctgatc
    18241 ggtagcaaag ggccgattgc cagcaccaat aacagtagcg atggcacgtc ccgccgcaat
    18301 ccgactgaca accattccaa agagcctaac gactatcatt gccgtaaggt gaattatgac
    18361 tcggcggtca gttacccgca gttggacgcc tgggcatcgc agccgaactt tcaggcgctg
    18421 atcagccagg cgaacgcgcg gcaaatcggc cttgaccgca tcatgatcgg tttcaacggt
    18481 accacctatg ccgagaaatc caaccgcagc gccaatccgc tgttgcagga ttgcggtgtc
    18541 ggctggctgc aaaaaatccg caacgatgcg gggcaccgca ttatcaaaaa cgtcacgctg
    18601 accgcccgcg acgaagacaa caagattgtc accaaaggca cctacggcaa cctcgacacc
    18661 gctgtgtttg acgccaaaaa cagcctgctg gatccgtggc atcgcagggc accggatctg
    18721 gtggtgatca tggcgtccga cctgctgacg tccagtaatt ttccgcgcct caatgcgctg
    18781 agccagagca accccaatac cgagttgctg gccggtcagt tgattgtcag tcaggagcgt
    18841 gtgggcggcc tgccgacctt cctggcaccg tacttcccgt ccaacgcggt gctgatcacc
    18901 tcgttcaaaa atctgtcggt ctattaccaa ctgggggcgc tgcgccgcag catcgttgaa
    18961 gaaccggagt acaaccgggt cgccacctac caatcgtcca acgacgactt tgtggtggag
    19021 gactacggca aggtggccct gatcgacggg attcagtttg cgcaggcagc aggcgacggc
    19081 cagtaacagc caggcggggt aacaccccgc cccaaccgga gaacacacca tgctgacacc
    19141 ggcacaacga cattttcagc gggtcatggc cgagcgccgg ggccaggcgg acaccgaaac
    19201 ggcggtgtca cgtactgccc atgagcaaat ccttcaccgt ctgcgcctgc atcaggctgc
    19261 gctgaaacag gtgcaatctg atgcgaccaa agcagagatg aaaaaagcca tgctgccgga
    19321 atatgacggc tggattgatg gcacgctgga aggcgacagc ggccgacagg atgaagtgat
    19381 cgtcaccctg atggtatggg ctatcgactg ccaggatcgc gcactgacac tgaggctggg
    19441 gcgttacgtc gttaagcatg gcctgtcttt gcctgccgac aagttccgcc gcgatgcggt
    19501 aacggtactg gctgaggaag tgagcaaccc ggtgttgaca ctggcaacca ccgatgcaga
    19561 cgccgacctg agcgggtata ccgccgtgct ggatgaagtg gccgcgattg tggatggcaa
    19621 agacatgccg gatgaagtgc gcgccaagct gtgcaaagcc cgcgccttct cacgccgtgc
    19681 ggcagtggat gcacaaacca aagccgaggc actgacactg ttccgggaag cgatggcccg
    19741 caatccgaac gcgggagtga aacgggagat cgccaccctg acgcgggagc tgaaaaagct
    19801 catgccgggc agcagtgacg cgccggaaga cggtgcgccc ggcgacgatg agacgaccat
    19861 ggaaacagcc gccggggaga caccgcctgc ggcttcagct gatgccgcgc agccagcggt
    19921 aaaaaagacc gccgtgcgta acaccacggc gcggaaaacc acacggccga cgggcaaaag
    19981 taaagccgcc cgtcagtctg ccaaacgtta atgacttcgg ccccgtccga caggcggcgc
    20041 accgggtgat ctgcccgtat acggtctttt tgcccggtgc ccaccgcctg acttttggga
    20101 gagttgagca tgagcctggt agctcaaaaa cgtgtcagcg acagcggtga cgtaccggag
    20161 attgacgacg gcacggcgac ggtcaacgcc ggggagttct ggccggtgat cgtcctgcgc
    20221 gatctgcgcc tggccgcccg cattaccggc ggtatcacta ccacccgcct gatgcacgtc
    20281 actactgaag cggtggtgca tgtgactgac caactggcga gctggcagca gacacaacag
    20341 gccgccggat atgtcgcact ggcggacgtt ccggccagac aggtcaacgg cgaaagtatc
    20401 aaggtgtacc gcttcaggcg tgcggtttat gccatcgcac gagcgctgtt gctggaggga
    20461 taccgcgatg tggataccac ggccaaaggc gacaaggcaa cggacacctt tgacaaccag
    20521 tgtgacgatt tatggcgtga tgcgcgctgg agcatcgccg atataagcgg tgctcagcgg
    20581 ctttttgcgg agttgtgctg atggtggtcc gggcgcttca gggcgatacg gtggacttgc
    20641 tctgttatcg ccattacggc acatccgccg gtgtcaccga gcaggtgatc gccgccaatc
    20701 cggggttaag ccgccagatg tttctggcag ccgggcaggc tatcacgctg cctgatattc
    20761 cccgtcagac agaacaggaa acggtgcagt tatgggatta aacgatcttc agcgcctcaa
    20821 tgatggggtg acctatggcc tgtccgtgat ggtgaccggc atcggggtga tgaccgtcag
    20881 tgaaaaagtt gcgctggcgg gcctggttat cggtgttgtc accgcgtggc gtgcctggtt
    20941 gttccggcgt cgtatcgagc gcgcacagcg acgccgcaat gaactgattg aacagatttt
    21001 acagcagtcc gagcgccgca cgctgaatac gtcggaacgc cgtgcggtgg ctattttgca
    21061 tcagggtgac gttgacgatg aaaaccgcga ttaaacgctg ttcgattgcg ctgattgtgg
    21121 cgctcggtat cacgctgtcc cccggtaccc tgcgcacgtc gccggaagca cagcagaaaa
    21181 cggccagttg ggaagactgc cgtgcgtcgc cgtattactg ccccgcgggc gtgctgacgg
    21241 tgggcattgg ctctaccggt aacgtgcaaa accggccgta cagcaatgac gagatcgccc
    21301 gacgctgggt taacgacatg cagcgggcag agaattgcgt caacggcaat tttaacggcg
    21361 cagccatgcc gcaatcggcg tttgaagcca tgaccgacac ggcgtttaac ctcggttgca
    21421 gtggcctgat gtggtttacc gaccggcagg gcagcaagca gcgcaccacc atctggaaac
    21481 acgcacaggc gcaggaatgg cccgcgatgt gtgaacggct gaccgatttt gtcaacagcg
    21541 gcggccagcg ctccgccggg ctggtcaatc gtcgcagcga ctttaaagcc tggtgcctgc
    21601 gcgatctggc gggtgtgcca tgaagctgac cgccaccctt gccgtgctgc tggtgctggc
    21661 cgtcggtggt gtgctctggc aaacctacca gcgcggcatt gaccgggcgc ataccgaggc
    21721 actgaccgac agcgcccggc aacaacgcga gctgttaacc gaattccggg cactggctga
    21781 cgatgccaga aacgtgctgg cgcaggtgcg cgagcgtgag caacagcgtt atgcagaagg
    21841 ggaagaacgc cgtgaaaaga tgcgtgaggg gatgcagccc gatacgtgcg ctaacactgt
    21901 ggtgcctgct gctgtcagcg acagcctgca aaaacgcgcc gccgtcgtcc agcgtgcaga
    21961 tactgcacga cccggtaccg cccagcctga cggcacccac accgacgccc gtactgaaaa
    22021 caccggtgac ctggggcgcg gtcgcgctct ggagtgatca gcttttggat gcgctggaca
    22081 cctgcaacgc agacaaggcc gccatcaacg atgtatacct gcgtcgcctt cagcgcctga
    22141 aggacgccgc agccacacca taggggaatg ctcatgctga aaaccgattc gctgcgtgat
    22201 gcgctgacgg catccaatac ctggtgccgg gccaacccgg aagccttcac ggtatttgtg
    22261 gaagaaggcg gtattgaaac caccggggaa acgccgtcgt ttctgtaccg ctactcgctg
    22321 gtgctgttcg tgatgaactt caccggtgat atcgacgatt tcaccttacc gttaatggcc
    22381 tggctgtggc agaaccagcc cgacctgttg ctgaacccgc aaaagaaccg cgaggtgaaa
    22441 ttcaccacgc ttatcaacaa cgacgacagc gccgacattc tgtttgaaat cccggtgcgt
    22501 gagcgggtta aggtcacgcg ggtcgataac ggcatcctgc gtgccgaaca cctgcctgag
    22561 cctcgtccgc gcctcaccgg cggggtatgg gatgcggtgc ttgacgatgc caccggggag
    22621 acagcgacat gacggataaa ctgtttcacg cactggatca ggtgtttgat gacatccttt
    22681 ccggcctgtc acccgccggg cggctgaaaa cagcccgtca ggtcgggcag gcactgcgcc
    22741 gcagtcagca gcagcgcatc agggcgcaga ggaacccgga cggctcggcc tatgcgaccc
    22801 gccgccgcaa ggtgctgcgc tcgcaaaaag gaatgatctt tgtctgggaa ggtcaggtgc
    22861 gccacctgaa aaactggcac ggtggccggg gaaaatatgg ccgcacgatc accggctttg
    22921 atgaagaccg caacgccatc cgcacgtttt accgcagcga tattgagcgt tatatcgaga
    22981 tcaacacgca gacggtacgc cgcacgacca gcaagacaac cccgatgttt cagcgcctgc
    23041 gcggttatcg ttttctcaaa atgcaggccg ataccgacgg ggccagcgtc ggctttgatg
    23101 gtatcgccgc ccgtatcgct cgcgtgcatc agtacggcga gcgtgacaag gtcgggccgg
    23161 gtgcctttgc ccgctaccct gtgcgtgagc tgctggggat ctccctggct gatgagcgac
    23221 tgatccatga cacggtaatc aacagtctgg ggagtgctgc cacatgagcg ctgaactgat
    23281 gcgattactg gaaaacctgt tgcgtgtcgg cgtcgtcacg gcggttgacc tggaaagctg
    23341 gcgagtgcgc gttaagagcg gtgaattgct cacagactgg ctacgctgga acacctcgcg
    23401 cgccggggcg tttaacgtct ggttcccgcc tgctgtcggg gaacaggtgt tactggggtg
    23461 ccttggcggt aacccggaaa ctgccgtgat catcggtagc ctgttcagcg aggcccaccc
    23521 ggcaccgggc aacagcctga aggaaattgt gatcaccgcg ccggacggtg cccggtttcg
    23581 gtatgacgcc gtagctggtg cgctggaagc caccggcatg aaaaccgcca atgtggtggc
    23641 cgcagtcagc gtcacactga acacgccggt ggtggaatgc actcagcacc tgaaggcccg
    23701 caccgtggag atcacccacg gcggcaccct ggccggtaac gtggcgcatt ctggcggcgc
    23761 gatgacctct aacggcgttc aggtggatag ccatcgccac ggtggcattc agcccggcgg
    23821 tagctggacg agtggcacac aatgaccgcg acctataccg gcatgaatcc gcatggtacc
    23881 ggcaccctga ccgatgcaga tcagctctgg cagtcagtgc gcgacattct gacgacgccg
    23941 ctggcatcca gggtgatgcg ccgggattac ggcagcctga tccctgacct gttggatgcg
    24001 ccgcagaacg cggtgacgcg gcttcagttg atgagtgcag cagttatcgc cctgacgcgc
    24061 tgggaaccgc gtatctcgct gaatgccgtc gatattcgtt attcagcatc gggagcggtg
    24121 gaagcggagt tatcagggtt gattaccgaa acgatgcagg cggccagctc tacccttacg
    24181 ctcaggagtc acggtgatgg cgacggttga tttatcgcag ttaccccagc cgcagatcat
    24241 tgaagtgctg gacttcgaag ttatccttca ggacgtgaaa gcggtgatga ttaccgcctt
    24301 tccggccgct cagcaggcgt ctgtgaccgc tgcgctgtcg ctggagtccg agccgttaac
    24361 cgtgatagcg caggtgatcg cctaccggga aatgatgcta cgccagcgga ttaacgaagg
    24421 cgcggaagcc tgcctgctta gtcatgccgt gtcatccgat ttggataatc tggcggccaa
    24481 cctgaacacc cagcgactaa ccattaccga agcgaccgac accgccgatg ccgtgatgga
    24541 agctgacagc gcgctacgtt tacgggcgca ggccgccttt gaagggttga gcgtggcggg
    24601 gccaaccggt gcgtatgagt atttcgccaa aagtgccagc ggcaaggtag cggatgccaa
    24661 agcgatcagt ccgtccccgg cggtagtggt ggtgtcggtg ttatccaccg agggtgatgg
    24721 cagcgcttcg gctgacctgc tggcggcagt cgatgccgcg ctgtctgccg atgataaacg
    24781 cccggttggt gaccgcctga cggtgcaaag cgccgggatt gtgcgctatg ccattacggc
    24841 ggtgttgtac cgctatccgg ggccggaatc ggagccgatc cagcaggcgg cacagcaggc
    24901 gttaacgtca tggctcggta cgcaggggcg catcgggcgc gatgtggctc gctcggccat
    24961 catggcggcg ctgcatgtgc aaggagtgca acgcgttgaa ctgctggaac cggcgcagga
    25021 catcgtgatt agcgacacgc aggcagcgta ctgcatcggg ttcacggtca ccgagggcgg
    25081 cagcgatgag taacagtctg ctacccccat cagccagcga ctttatgcgc aacgtcgcta
    25141 actccaccca gcgcctgagt gagatagcgg tctgtctgga tacgttatgg agcgccgagc
    25201 gctgcccggc acaattactg ccgtacctcg cctgggcgct gtcggttgac cgctgggata
    25261 aacgctggtc agaacagacc aaacgccagg tgatcaaggc ggcctggctg gtacaccgcc
    25321 agaagggcac cctcgcggca ttgcgccggg tggtggaacc gttcggctat ctgattcggg
    25381 tcacagaatg gtggcagacc ggcggccagc cgggcacctt ccggctggat atcggcgtgc
    25441 aggacagcgg cattaccgaa gaaacctatc tggagctgga gcgcctgatt gccgatgcca
    25501 aaccggtaag tcgccacttg ctggggctaa atatcgtcat ggactgtgcg ggtaatatcc
    25561 cgctggccgc cgggcagtac agcggcgaca cactaaccgt ttatccctat ttccctgaaa
    25621 ccattaccac gactggcatc gatgtacgcg gtgcagtggt gcatctgtct gacaatatga
    25681 gcgtatccgc atgacaacaa aatactatgc gatcctgact aacaccggcg cggcgctgct
    25741 ggcaaacgct acggcgctcg ggcggcaact accgattaca caaatggcat tgggcgacgg
    25801 tggcggcacg ttgccaactc ccgacccggc gcaaacaaaa ctggtgaatg agcgccgccg
    25861 ggcaccactt aattcgctga atgttgaccc ggcaaacccc ggtcagatca tcgctgagca
    25921 ggtgatccca gaagatgaag gcggctggtg gatacgtgag atcggcctgt acgacgccaa
    25981 tggcaatctg attgccgtcg ccaactgccc ggaaacctac aagccgaaat tacaggaagg
    26041 gtcgggccgg gtgcagacgg tgcgcatgat tttgattgtc agcagtaccg acgcggtaac
    26101 gctgaaaatc gacccgtcgg tggtgctggc gacgcgatca tatgtagatg gaaaattttc
    26161 taacgcggta ctgactggta caccgaccgc gccaacggca gttgttggaa ctggtacaac
    26221 acaaattgca accaccgcat ttgtgcaaac agcagtcagt acgcgcgttg acgaggtgac
    26281 cggtaatgcg ccgggtgcgt tgaatacgct agaaaaatta gcgaaatcgt taggcaatga
    26341 cccggatttt gtcagcgctg tcagtatgtc aatcggtcgc aagctcgata tcacggagat
    26401 tgttggtatt ccgctgccct ggccgcaggc gattgcgccc accggctggc tgaaatgtaa
    26461 cggtcaggcg tttgataaag ccgtgtaccc acggctggca caggtctacc cgtcaggtgt
    26521 attgccggat ttacgcggcg agtttattcg tggctgggat gatgggcgtg gtgttaatcc
    26581 gatacaaccg ctgctcgcat gggcagacgc gaggctggcg gtacatacgc acgaaatgcc
    26641 aacggcccgg atggccgtcg gcgtagatgg cgtgtcgtct acatgggtcg ttgtcgagaa
    26701 tgatgtctcg ccaacaaaag tgtttaccca tcagcaagct ggcggcgctg gagaaaccgc
    26761 gcctcgctgc gtcgcattta actacatagt gagagctgca taatgagtga gaaatattct
    26821 gttgctgtac agagtgcccg catgggaaaa agtgggttgg cagaatgcgc aggatggctg
    26881 actgtttatc acgttgatca gcagacgcgt gaatatactg gcgcgagtta tgaatacatg
    26941 agtgtcggca cggggttacc agccgatagt tatgctgaca cgcctgatct gccaactgcg
    27001 gggcaggctt tacggcgtag cgctgatggt gcgggatggg agcatgtacc ggacctgcgc
    27061 ggcaaaacgg cgtaccgcac ggcggatggt caaccgcaga cagtgacagc tctcggtgaa
    27121 ttgcctgacg ggttgacgct gttttccccc tcgacggcat tcgataaatg gaatggcgaa
    27181 acctgggtga ctgatgttgt tgcccaacaa gcggccgcag tagcagcggc acagcaggaa
    27241 caggcggcgc ggaaaacagc cgcaacggcc cgcattactg aactgagtta cgctgtagag
    27301 ctagggatag ccactgatgc agagcaagca gcgctgaagt catggaaaac ctatctggtg
    27361 caattaagcc gtatcgacac cagcgccgcc ccggatatcg actggccgga aatcccttct
    27421 acctgatctg cccggcccag cttcgacagg gccgttaaac cagccctttc aacgtgttga
    27481 cggtgtccgt catggctgtg ctgacggtgt tcatcgcttt ggttgcactg ctgcgcgcgt
    27541 tgtccatcat gtcgctaaag gatgaagatt gcagcttttc ccgcaggtct tcatcacagc
    27601 gctgaaagct cagtgaaaac tcaatcttct ttgcctttcc gtagcgattc agctctgtgc
    27661 gcgtggtctg cataccagtc agcacgtaca tgccgtaaat ctgcccggta ccgtcaatca
    27721 acggccaggg gcggccgctg taggcttgcg tggtcagtgc agttaatgag acttccccgc
    27781 cggtaatttc cgggtacagc acaccgctca gcgtgatctg atcttccccc gcgccaatgt
    27841 attgccattt cgcggagcgg ttgatccgct cattcttcac atgtcgccag gcgcgcgact
    27901 gttgaagctg ctggtaaggc agcgtttgca gctcaaacac aaacaacccg aataccatca
    27961 tcatcggttt ttctccttac tctctgtctc tgaagctgcc gcgctgaagt ctgtcgcggc
    28021 gggccagttc ggcactgact gcatcggcca caatacggcc cagctcgcgg gcgtcctgcc
    28081 gttcaacgcc gtgcaggtgt atatgaattt ccccattgaa accgcccgcc gccggtgttc
    28141 tggccgccgg acgactgacc ggtgccgcgt cggcttgttt gacgggttgt gttgccgcga
    28201 ccacggcggg gcggtcgctg agcgcctgca tggtctgcac tggctgtgag ggggcagaag
    28261 gtgtgccgcc agtaagccgg gattcctgcc attcgccacg cacagccagc gcttttggca
    28321 ggtttttgaa aacgatatcg ccggggccga tgcgcttttt agtttcttcc agcacaccgc
    28381 cggtgttgtc ggcaatcttc tgtaaacggc gctgggtacc gctgtcaccg gtcaggggcg
    28441 gtttaggcgc aggtggcggt gcggtggtgg cccctttcag gtcgccggtc aggttagcaa
    28501 ccagaccttg caaccggtct ttcccttccg gtgtcagttc gcctttcaac tgatcggctt
    28561 ttttctgtgc cgcatccaga ccagacggga ttaaaccgag cttttccaga acccagccga
    28621 tcccctccat cagcttttgc agtggcaata acagcatgtc cagcgccgac cccagcacct
    28681 tgccgaatcc gtagcccgca attgcgcagt catccagcgt cttctttgtg gtctggatag
    28741 gctgaaaaag ctgcgtaaat cgatcccaca ggcgcgacac ggccgacaca atcacatcaa
    28801 agacgggagc caggcccgta aatgcctgcc gaatggggcc aaggctgata acaatgccgg
    28861 taaacatccc gctgaaaaac gttctgacag gctcccagaa tcgccagata agcagcccgg
    28921 ccgccacaaa cgccgtacca atcaacccga ttgggcttaa cagcaatgac agcacgccac
    28981 ctaacaccga gacggcaccg gtgatcaggc tccacagcac gtgcaaaccg ctcagccgca
    29041 acaacagccc gccaacgccc ctgaccagtg cccctaatgc tgacaccggc gaggtaaaca
    29101 cggccagtaa catgccacgt agcggggtca gtgtcgcggc cagtcggccc gtgctgccag
    29161 agaaaagctg tagccagccg cccatgcgtg ccatcggccc gccgagcagg ctacttaacc
    29221 cggaaaacat cgacaccgca ccaccgacgc cccgtgcacc aagcagcagc gaaaagccga
    29281 gctggagctt agccagcgga cccatcagca gaccgattgc cagtgaggtg ccaccgatcg
    29341 ccaccgcgaa tgccgccgca ccgccgacag ccagtaacag cgtttgcgtc agcctgggat
    29401 tctccctcac ccagccgctc acgttggtaa tcacatcgct tagcccctgc gtcaggctgc
    29461 gcagtggccg gtctgttgtc tcttcaacct gaatacgaaa cccttcccag gcactgtcga
    29521 ggtttttcag gtcaccgccc aggttatccg ccatcttttt ggcgacggca tccgcttcac
    29581 ctttggcttt cttcagttca ccagacagtt tacccaatgc accgctaccg gccgcctgta
    29641 ccagcgtttg cagaccgaca aaggcctctt ccccggcaat atctttgaag aaagacacct
    29701 gatcgacctg gccgtatttt ttagtcgcct tgtacaggtc acgtaatacg tcctgcattg
    29761 gccgcatctt gccttttgcg tcagctaccg acacgcccag ctcttttaac gcctccgctg
    29821 ccgctttcgg tggtgaagcc agacgggcaa ggctggcacg catggcggta ccggcatcac
    29881 taccgcgaat accgttattt gccagcatac cggccatcgc ggccgcatct tccaggctga
    29941 tccccagctt ggccgccacc gggccggtgt atttcatggt ttcgccgagg ctgaacaggt
    30001 cggtgttggt gcgagtaaac gcgccggtca gcacgtcact gacgcgatcc atctggctgg
    30061 catccagatt gaactgtgaa agaatgtttg acccgatatc ggcggtttcg cccagttcca
    30121 tgccaccggc cagcgccata ttcaacacgc ccggcaatgc cgcctgaatg gcctgcggag
    30181 taaacccggc catcgccaga aacgcctgcc cgctggctgc gtcgcgggtg gtgaatgcgg
    30241 tttccgcgcc gagctttttg gcctgcgccc gcagtgccgc cagttgctga tcgcctttat
    30301 ccagccgggt cagcgcctga acgcgtgaca tttcttcatc aaacccaacc gccggggcca
    30361 gaaactgccc gcctgcatat ccgacagccg caccgcccgc caccgccatc gtgccgctgc
    30421 cacgcagttt gcctgccgtc tgttgcatgc gttcataacg ggcgcgtgcc tgcgtaaccg
    30481 cggccagttg tcgcctctct cgctccagtg tctggttata ttgttcggtg cgccggatgg
    30541 cgctctggat agtggcgtta ctgccgacaa gcgacacacc gtgaccgcgt agcgcctgcg
    30601 atgcggcgcg cagtttcacc atttcctgat cacgggtgac gttcagccgt tccagttttg
    30661 cggccagtgc ggccatgtgt tcccgttgct tatcggtcag cacggtgttg ttttgctggg
    30721 cctttttcag cccgtctagg ctgcgactgg cttcatcaat cttgcgtgag gtcttttgta
    30781 cgctgtcgcg caggcggttg aaggttctgg actgattatc cagatcctta atagcggcct
    30841 gggtgcgttt gagggattca gacaaaccgc ccgcactctg gcgggcggcg ttgaccgggc
    30901 gggtcagccg gtcgatagca ctgaaggcta cgcggatatc aaggcttttc atcggcttca
    30961 ctggctccac ttcggatagc cgcccgcgcg cgccaggcta tcacgtcgcc cagatccatg
    31021 ctgaacagtt cagagggcgg ccagttaaaa acaacggcaa tatcagcgac cagatcgtct
    31081 atctggtcga actgcaagac ggttacgctt cctccgtcgc ctccgcgttc ggttcgccag
    31141 gctccgcatg cactaaaaaa ggcgtgatgg cctccgccag tcgcatgaaa tcgcgggtat
    31201 ccatcgcgtt aatctcggcc agcttcagct ttggcgaggt aacacgcgtt aacagggtgg
    31261 tgatggaatc cacatccata ttcaggacgt tgaccagccg caggccgcgc agtgagccag
    31321 cctgtttgat atcgtcggtg atgctcacct ggctgatggc gttatcgccc cgcacgatag
    31381 gcgtcgccag ggttacggtg tgttcattcg gtgtgttcat ggtgacaggc tccgggcggc
    31441 ttgtggccgc catgattcag gttgttcagt tacccagccc cagcgcagac gtgatgcgat
    31501 ccgggtagat gtttttgccg tttttcttgt agatgaaatt cagcaggtca atttccagca
    31561 ccgattgatc gtcaatcgac agcttgtaat aggtgttttt cagcgcatag gtaacggacg
    31621 tgtcttcgcc ctgcttggac tcgccgccgt caatctcggt aatacgcccg cgcatttcca
    31681 cctcgacaag ctggctatcg ccgtcggtgt agtattcccc cgcgaagcgc aggcgaacgt
    31741 catcgatatc accgccgtat tccagcaaca gctttttctc catgccgcca acgaccatct
    31801 gcgcttccag tgcgccggaa tccataccga gatcgaccgc taccgagcca atcatgcccg
    31861 cgccctgaaa gtcttcagtc ttgcgggtca gctttggcag cgtgaccgat gtgaccttgc
    31921 cgatctggtt gttgccgttc acaaaacagg tgaacaggcg caatttatgc ggtacagcca
    31981 tttacacacc tcccagtgac gagaaagcgg agtcaaaata gtcatcggtg aaggtctggt
    32041 atagcgtcag gtcttccagc ggtggcaccg gcgtgtactt gtaacgcacg cgcacctgtc
    32101 cctgtcgcag gccggttgtg gggttatcct gaatatcaaa ccagcattcc ccaccgatca
    32161 gcctgcccgc cgtgaccagc gcgctcagct tgccgttgat gccattcacc acgtctttca
    32221 cgttggccgg agtcagtggc tcgtcaacgg cttcaaactg cgcttccgcg atactgtcag
    32281 cgaggatttg cgcggtgcgg gtgtacacct caaacaggta atcatgggta tcggtggtgc
    32341 ggttgcccca gaagcgaaac ccgttgcgct taatcagcgt ggtgatctcc tggttgttga
    32401 gttcattggc gtcgctgtct tcggcctgaa gcgaccagaa cacatcccgc gagataccca
    32461 gcacgttatt cactgccacg ttcgacagcg acttatgcca gccctgatcg ttatcaatcg
    32521 ctgcgcgcag gccgcaggca taggccgacg ccggaaaggt ttcattgctg ccgctaagcg
    32581 ggttataagc gataaagtcc ggccagatca gcatcagctc acgatacgca aactgcgcac
    32641 ggtaggtgat ggcctccgcc atcgtggtgc agccgtgaca accggcatag acaaacgccc
    32701 gcagattctg cgcgatcaca cacagtgctg acgtcacttc ggcggtgtca tagtccggca
    32761 ctgccagaat gcgcggccgg tagttaacct tggcttctgc tgtcagcaag gcgtacatgc
    32821 cggtgtaact gccgtctgtc gccgtcccgc cgataatcag ttgggattgg gttttgtcgc
    32881 cgccttcggt tgctgctgcc acccgtacca cgatcacttt cgggctggtc tggtcagaaa
    32941 tggctttcag cgtcttgtag agcgagccgg ttttacccgc tttgcccagc acgctattca
    33001 cccgtgtgat gagcactggc gtattcaggg gaaaggtgtc tgcatccgca tcctccgcca
    33061 ccgccaccac gccaatcaca ctggaatcaa tgtcattgat tgcggttacc aggtcggtat
    33121 tttcacgaac gcgcacaccg tggaaacgtg tctcggacat gttcgccacc attacgttat
    33181 tgagttcatg gcgataatcc ccgatatccg ccgcacactc acgcgctgac aggtctggcc
    33241 gtccagcgac aacaaaaagc catttttccc cacgcgtgcg cgtgaaatca tgcgcgaaaa
    33301 caggggggag cgatggctat caccgaactg gctgactcac ttatcactac ggcgaaacgc
    33361 tacgatgatg cgctgaccga ggcggtaaaa agcccggcct tcagcattac gctgggtggg
    33421 aaatcactga aggaactgag cgaccggctg atctcgttgt cgctgaccga caaccggggt
    33481 tttgaggctg accagctcac gctgtcgata gacgacagcg acggacgcgt ggagctgccg
    33541 ccgcgtggcg ctcagattgc actgtccatc ggctggcagg gtgaggcgct gacttacaaa
    33601 gggctgtata ccgtggatga gatttcccac gaaggcccgc ccgatgtgct gggtgttacg
    33661 gccagaagtg cggatttccg cgaagagttt aacgtgaaac gggaggtttc ctggcatgac
    33721 gtgacggtag agcgtgtcgt gtcggcgatt gcgcaccgct acggtatgaa ggtgcaaatc
    33781 agcgacatgc tgatgaatat cgaaatcgac cacgccgacc agacggaaga gagtgatatg
    33841 tcattcctga cccggatggc cgagcaactg ggggccattg ccaccatcaa aaacggcacc
    33901 ttgctgttta ttctgcccgg cggcggtgtg acggcatccg gtaaggcgct gccgtcggcc
    33961 agtatcaccc gcagcagtgg tgacggccac cgttttcgca ttgcggatcg ggatgcctac
    34021 accggtgtgc gcgcctactg gctggatctg aaattcggta aaaagaagaa ggtcagcgta
    34081 aagcgccgcc ggacaaagcc caaaccgaaa aaggaaaaga gcagcagccg tgaaggcgat
    34141 tacatcaccg gcgcggaagg taacgtgttc gtgctgcgta aaacctacca gaatgaagag
    34201 gtcgccaaac gggcggcggc agctaaatgg cgacagttgc aacgcggggc cgctgaattt
    34261 tcgattaccc tggcgcgtgg ccgtgctgag ctgtatcccg aaatgcacct gacagtaagc
    34321 ggctttaaac cggatatcga caatcaggac tggattatcg cccgcgtgga gcacgttatt
    34381 gatggcaacg gctttaccac ccgtctggaa ctggaagcaa aaatccctga ctggatagca
    34441 gaaagtgaat aaaatggcgg cgagttcaac tcccacaggg gagccattat gttcagatgt
    34501 cctttctgcg gggcaatggc ccgcacccgt accagtcgcc gcctgagcga tatcaccatc
    34561 cggcagtatc accagtgcca aaatctggaa tgtagtgaga catttaccac cctcaacacg
    34621 gtagaacggc gcgtatcaaa gcgtacacgg gaagacccgc taccgcctga ctttatcccg
    34681 caagacgcct ttccggcatc gcattacgga cgggatcagt tgaatctggc gttgtaaaac
    34741 agaagccccg caggatgagt gcggggcttt tgtttgggta tcgattattc aaccacggtt
    34801 aacaatggcg actgattgaa gaccgtcttt tttgtacctg aaaaacgggt gctgccactc
    34861 tgctgccatt ttgctgccac ttgccaaatt acaggcacaa aaaaaccgcc tcgtggcggt
    34921 catgttcttt taattatttt cttatattgc aaggcgttaa ggcatggtgc ccagagcggg
    34981 acttgaaccc gcacagcgcg aacgccgagg gattttaaat cccttgtgtc taccgattcc
    35041 accatctggg ctcagaattt ggaggcgcgt cccggagtcg aaccgaggtg gacggatttg
    35101 caatccgctg catggccact ctgccaacgc gccccattgt aacgctacta ctcaactaac
    35161 ttggagcggg aaacgagact cgaactcgcg accccgacct tggcaaggtc gtgctctacc
    35221 aactgagcta ttcccgcatt ctacagaaca tattgtttat taagtaattt caataaactg
    35281 tgttgctgtc gatgcggtgc attctactta cctgacgcag tgagtcaata aaattatcac
    35341 ctcaccagaa ccgtttgctg ttttttaagg cgaggcgatc aatgttcaag caaatcacgc
    35401 caggctgcgc tcaaatactg gaacattgac cagaacgtta ataccgccgc cacatacaga
    35461 gccacgacgc ccgccgcctc aaccataggc tctggccgcc acagtaaacc gaccaacgag
    35521 accatctgcg cagtagtttt aattttgcca atccaggaaa ccgccacact gctgcgttta
    35581 cccagctctg ccatccactc acgcaaggcg gaaatgatga tctcacgcgc aatcatcgtc
    35641 gcagcaggca acgtaatcca ccaggaatgg tagtgctcgc agaccagcac cagggccacc
    35701 gccaccatca ccttgtcagc taccggatcc agaaaggcgc cgaaacgcgt ggtttgcttc
    35761 catagacggg caaggaaacc atcaaaccag tcggttaccg cggcaaaaac aaagatgcca
    35821 gcgcatacca ttggtgccca gctaaatggc agataaaacg ccagtacaaa gaatgggatt
    35881 agcacaacac gaaacagggt aagccacgtt ggtatattaa atcgcatagc gtctgggtaa
    35941 ctgtctggcc cgaaagataa tagggttatg ttgctacatt gcctctagtg tttcaatgca
    36001 tgaaagattt tttctgccaa cgcatgcgaa attcccggca cattggcaat gtcttccaca
    36061 ctggcattca tcaatggctg caatccgccc atgtatttta gtaacatttg acgacgcttt
    36121 ggcccaaccc cctcaatcgt ttccagcgaa ctggtacttt tgactttagc acgctgttta
    36181 cggtgaccac tgatagcatg attatgcgaa tcatcacgaa tatgctgaat cacgtgcaat
    36241 gctggcgaat cagacggtaa agcgataccc tcacccgtcg cttcaaagaa cagtgtttcc
    36301 agaccggctt tacgatcact gcctttcgca acgccaagca gcacagggcg agaggtatcc
    36361 caggtcacat gcaatgacgc aaaaacatcc ctggcctgcg ccaattgccc tttaccgcca
    36421 tcaatgacga tcacatcagg aatcttgctt tcatcaattg ctttatcgta tcgccgccgg
    36481 agtacctgat tcatcgccgc atagtcatca cctggtgtaa tacccgtaat attgtagcgt
    36541 cgatactccg aacgtagcgg gccctccgca ttgaatacga cacaggaggc cactgtctgc
    36601 tcgcccatgg tatgactgat atcgaagcac tccatgcggt tgattttttc gatcccaagc
    36661 acagaggcca gcgccgtcag acgttgctga attgtcgact gctgtgacag cttcgttgtc
    36721 aatgcagtgt gcgcattcgt gcgagccagt ttgagataac gcgcccggtc gccgcgaggt
    36781 cgggtttgaa tctgaatttt tcggcccgct tgctcggtca gagactcagc cagcaactga
    36841 tgctcgggta gggaaaaatc cagcaggatg tcagacggca aggtacgaga aacgctccct
    36901 tgcaaataga actggccaac aaaggtctgt accacttctg ccagttccgt gcctccagga
    36961 accttcggga aataactccg actccccagt attttgccct gacgaataaa gagcacatgt
    37021 acacacgcca taccggcatc gaacgccaca ccgatgacat caaggtcatc tccatcgcca
    37081 gagacaaatt gtttttcggt gacacggcgt acagcctgaa tctgatcacg aatacgagcg
    37141 gcttcctcaa acttcagtgc atggctggcc gcttccattc gttcaatcag acgggttaat
    37201 acctgctgat ccttacctga cagaaacaga cgaacataat cgacctgctg ttggtattcc
    37261 tcttcgctaa ccaggccgct aacgcacggc cccagacagc ggccaatctg atattgcagg
    37321 cagggacgcg agcgattgcg gtacacgcta ttttcacatt gccgaatggg aaataacttt
    37381 tgcagtagca tcagtgtttc acgaaccgca ttcccattag gaaacgggcc aaagtactcg
    37441 cctttggcat gtttagcgcc tcgatggaca gacagccggg gatgtgtatc cccgctgagg
    37501 aaaatcatgg ggtaggattt atcgtcgcgc agtaacacgt tataacgcgg ctgataacgc
    37561 ttgatgtagt tgtgctcaag caacaaggct tcggtttcag tatgcgtgat cgtcacatca
    37621 atctgacgga tactttttac caaagcctct gttttgcggc tggcaacatg agtacgaaag
    37681 taactggaaa gacgtttttt caggtcctta gctttaccga catagataac cgtgtcactg
    37741 gcatcataca tacggtaaac cccaggctga ctggttacgg tcttcagaaa agcctgggca
    37801 tcaaaacagt cagtcac
//
