# Supplementary material for: May the Phage be With You? Prophage-Like Elements in the Genomes of Soft Rot Pectobacteriaceae: Pectobacterium spp. and Dickeya spp
Source: Front Microbiol. 2019 Feb 14;10:138. doi: 10.3389/fmicb.2019.00138 (PMC6385640; doi:10.3389/fmicb.2019.00138)
Supplement: Supplementary file 2 [file Data_Sheet_2.ZIP › Supplementary_prophagesGENBANK_files/Genbank FILES _SRP_prophages/phiDze3.gb]

LOCUS       Exported               46760 bp ds-DNA     linear   UNK 02-AUG-2018
DEFINITION  phiDze3.
ACCESSION   .
VERSION     .
KEYWORDS    .
SOURCE      phiDze3
  ORGANISM  phiDze3
REFERENCE   1  (bases 1 to 46760)
  AUTHORS   .
  TITLE     Direct Submission
  JOURNAL   Exported Aug 2, 2018 from SnapGene Viewer 4.2.3
            http://www.snapgene.com
FEATURES             Location/Qualifiers
     source          1..46760
                     /organism="prophage phiDze3"
                     /mol_type="genomic DNA"
                     /note="/genome_id=6666666.356842"
                     /note="/genome_md5="
                     /note="/project=robertczajkowski_6666666"
                     /db_xref="taxon:6666666"
     CDS             complement(152..667)
                     /codon_start=1
                     /product="hypothetical protein"
                     /label=hypothetical protein
                     /db_xref="SEED:fig|6666666.356842.peg.1"
                     /translation="MRLKYIALIPVLSAWGFVFIFIDWNLINFIFIIWCMKTISMQKIK
                     GDDFNHENFMYGILPATGMIGILNTARPLSFTEFNGRVVIGGGWVWCVRHNRFKKIPLA
                     HIDLSSLILVDTGEAYNSQSAARLDEKLGKMAVYGVRDCASLRVEKSLENMIINRIINR
                     LMYWYFSF"
     CDS             complement(712..1296)
                     /codon_start=1
                     /product="hypothetical protein"
                     /label=hypothetical protein
                     /db_xref="SEED:fig|6666666.356842.peg.2"
                     /translation="MGKYVSPSKKGFYDDNIGGIPDDAIPISDELWQQLLAADIINWNT
                     VPPSAESFPPPTIEQIYEQKLALIQANGETAAKAVKLPYSDEEANTWWCQYHEAEQYSA
                     NSAYVPSMLNAMVSSSGGAWVLQDLVSSILSNAAAWKLAAGDIIGNVKAKVVLLKSVKA
                     GVDAGSKDESELINFDCSISVPLVNLQDKFD"
     CDS             complement(1298..2224)
                     /codon_start=1
                     /product="Phage tail fiber protein"
                     /label=Phage tail fiber protein
                     /db_xref="SEED:fig|6666666.356842.peg.3"
                     /translation="MNRTDAPKKQPVPFGINGSREDLLATTPAGDNQASYDVGFPPVTM
                     ILKSAGGRPPKGQDMNQILFELSAIGRWLSAGSLNTFDATFATAIAGYPKGAVLLSDDG
                     TTIYVSTADANTNNPNSVSTGWLNLLSFLGGAPSSSPALTGVPTAPTAATGTSTTQIAT
                     TAFVHAITDLLAPLASPALTGTPTAPTAATGTSTTQLATTAFVQAALTALLPKRSFIAG
                     DSIRIPDVPGGLIIQWGSKTLNASGGTSILFASVFPTICLGIVMSPNDADTSANYRVSA
                     TSAAVNGFTGVTTKPQATAITYIAIGY"
     CDS             complement(2234..2872)
                     /codon_start=1
                     /product="Phage protein"
                     /label=Phage protein
                     /db_xref="SEED:fig|6666666.356842.peg.4"
                     /translation="MTWNQTILTQYSASTRLLNIIDTFNQAVSLDDFTDEFITKVWDLT
                     TCESFGLDVWGKIVGVSRYVKAEISTNSFGFYESDSGDENEYPSPFNQEPFYAGIQETE
                     TVRLGDDAYRTLIMCKAFSNISIATIPEINRFIKILFSGRGRAYCVNYRDMAIGITFEF
                     ALAPYEVSILTNYDVVPVPSGVQLNITQIVPPYFGFSVDAYPFNDGTFF"
     CDS             complement(2869..4098)
                     /codon_start=1
                     /product="Phage protein"
                     /label=Phage protein
                     /db_xref="SEED:fig|6666666.356842.peg.5"
                     /translation="MTTLNTAVPDVTITENGLLVPDVSDVLAGRLTDMTTALGGGASQS
                     LSSPQGQIAQSDTEIIAQEYDKLLCLFNQVNPDYATGRWQDGIGRIYFMDRISAQGTVV
                     TAQCVGLVGTIIPAGSTAIDVNGYIYATSDPATIPTSGTVDVQFTCQTTGPIACGAGQL
                     NQIYRAVSGWDSVNNSTAGVVGVNVESRIAFETRRKQSVSRKARNQDGATLAALLATTN
                     VLDAYVWSNRTAAAVIKGETNVSVAAHSIWICVYGGADADVAEAIFGTYNPGCNFNGSA
                     THTVYDSMNYEAPYPEYVMQWQKATPTPVYFKITLDGSLNPPSDITSQVKTMVQTVFNG
                     NYDGIVKARIGATINAGKYYAPVISISPDSVGILSLEVSPDGVTFTPSVTMGIDQVPTI
                     QASNITVVLS"
     CDS             complement(4095..4454)
                     /codon_start=1
                     /product="Phage protein"
                     /label=Phage protein
                     /db_xref="SEED:fig|6666666.356842.peg.6"
                     /translation="MTYKTMQLDTSNWDLTLDGSGNLAIADGSYAVAQDVASACLVFSG
                     ECYYDNTLGVPWKEEVLGKRPTPGYVAQKMQTEAKKLPIVDQALASVFFDKNTRRMRGT
                     IRVTDTDGNTAQVNL"
     CDS             complement(4451..5161)
                     /codon_start=1
                     /product="Phage protein"
                     /label=Phage protein
                     /db_xref="SEED:fig|6666666.356842.peg.7"
                     /translation="MADNLFTPIAPQTSDSESLQYIFQKLLQGAFFIEIAQVIAIRGSA
                     PNLVVDVLPLVTRTDPSGAMIDNSPIYNVPVWRLQRGNSAVIMDPVVGDIGMIAICDRD
                     NSIARANRKQSVPGSKRMHSKSDALYLGGFLNAQPTQYIEFSDGAINITTPNPVNIHCS
                     SANITAPDGVNVTTPTMHVTGDITAGGNITDNNGTQSASLKTLRDKYDTHRHAVSGVQG
                     GSSTVTSNTTDNPA"
     CDS             complement(5154..6017)
                     /codon_start=1
                     /product="hypothetical protein"
                     /label=hypothetical protein
                     /db_xref="SEED:fig|6666666.356842.peg.8"
                     /translation="MYNKKSLRFDFVSETSSFDKSGNNKISISEARASLSCQSSGNLFG
                     TQVSVSIFGLSLDLLASLSSKAMGLFGSDTERISMKIFVGDTAIFTGYMTSSIANMNSV
                     PNAALMITATANADLQNKVASPFSFNGPTPVADAINAICKSGGYTSNIIGLDGMVVTNP
                     YYEGSVFDQLQSLCDAMGISMSIMPPTILFWPQNSVKDDVTPLISPDHGLIGYPVFSNG
                     GLMFQTQFSTLLTTGRNVQIKTSLPHASGTYKLTSVTHELSSWLSDGPWHSVCIANRAI
                     EGNNSG"
     CDS             complement(6007..6312)
                     /codon_start=1
                     /product="hypothetical protein"
                     /label=hypothetical protein
                     /db_xref="SEED:fig|6666666.356842.peg.9"
                     /translation="MRTVTLQPLKSQSISVNLAGQQCIIRLIQRNSGLYMDLTVNGNPI
                     MQGVPCWYGNKIVRYSYLGFAGDLVFVDNVGQSDPDYSGLGGRFTLYYIEASELVQ"
     CDS             complement(6309..7124)
                     /codon_start=1
                     /product="hypothetical protein"
                     /label=hypothetical protein
                     /db_xref="SEED:fig|6666666.356842.peg.10"
                     /translation="MSILSLNTADIFNAIGGGSPLSIIDSVLHPQYVIRSSSDDSVALE
                     FSGMASIQPSGRAQITTATVEGGKYQSINKVKEPGVVRCEIIVTGLTGYSGSIPNIFDL
                     TFISQRDVLSTIKTMLETASTYNIETPKETLESYDLIDHSYEVNSQRGVTMLTIYLYFQ
                     EVMQQMEVVISGAQSGSKPTDDPKSQSGTGVGSTTKDAGSTPSTVDELGKSWASLKSSV
                     SDITNNVTSAVKTGFQSALDTVSKPVLEVANSATQKAAELAKNINEAIT"
     CDS             7429..8184
                     /codon_start=1
                     /product="Phage antirepressor protein"
                     /label=Phage antirepressor protein
                     /db_xref="SEED:fig|6666666.356842.peg.11"
                     /translation="MTTFTVENLPAISHNSVPVITTELLSQLYGTNSVRIRNNFQRNRD
                     RFVEGKHFFMLTGSELSEIKHRVSLRDSVKIPANIRALTLWTERGAARHAKMLETDRAW
                     DVFEKLEDCYFNQRELRPEKTTTLERTPLRDAVNLLVGKTGMIYSDAYSLIHQRFNVER
                     IEDLTQAQMLQAIEYIHCLIIDNRPVSSPLFSGRVLLTFKEGRMEMAQTARDDEQLISA
                     TTMVELLQKRGFVIMTKDELTTRIAGILG"
     CDS             complement(8227..8760)
                     /codon_start=1
                     /product="Phage Rha protein"
                     /label=Phage Rha protein
                     /db_xref="SEED:fig|6666666.356842.peg.12"
                     /translation="MNNHAVIPAFDFREMVMVADGRIVTTSLRVAAYFGKRHDNVIRAV
                     KRLSIDCSNDFNRLNFEAVEYLDKKGEMRLMYNITKDGWMMLVMGFTGKAATAIKESYI
                     TAFNWMADQLQRRHMMGEEAMHQLAIKETRSKLKGTIGSRLMSDRKREIPLLRAEEERV
                     RALSCPPLFDGLTL"
     CDS             complement(8966..9148)
                     /codon_start=1
                     /product="hypothetical protein"
                     /label=hypothetical protein
                     /db_xref="SEED:fig|6666666.356842.peg.13"
                     /translation="MRQSLLYFFIYAFTLTFFAKPIDIMMNIDGGYGVMVIAIWVVISS
                     AIVHIIHFWPTKINK"
     CDS             complement(9205..10977)
                     /codon_start=1
                     /product="Membrane-bound lytic murein transglycosylase D 
                     precursor (EC 3.2.1.-)"
                     /label=Membrane-bound lytic murein transglycosylase D
                     /db_xref="SEED:fig|6666666.356842.peg.14"
                     /translation="MIINELAYKVTIKADEFLNGKKKVKDEVSDLEKEFDRTSKNINRT
                     LKSSSNDFAQFGNAAVSSFRGVTAAAAGFLGIGAGLYGIKQLFTSTSNEIVRASTQAKF
                     FGTDVNKMFGLRRGFQQAGLNGDAFIGAAGSARMALANIKDPTIFGGLTGAAQNLMVLG
                     ARTGLNINNLGDPNKALAEFTRYGKSHSQENLMQVMAAAGFDPTDAAKIKSGELKSLVD
                     SETKKSQITAQQVKEQENLVATLASLDAEIDRVRQNIVMTFTPEVLAAMKSFSDWLRDH
                     QGDIIGFFREAGDKIKSFTEAVGGANALLLLLAAGLAANPLVRAAIAATTAYNAIDNAQ
                     EQARKEGKGVGQYLVDEMKSRDGKNPFITWDGIKSFFGISEPEQYGQSSKSSHRISPER
                     MNDILNGVMMTESGGNPLAYNVKSGAAGAFQFMPGTARDVGLRVDSQVDERLDPAKSRA
                     AASIYMSQLLNKYDGNIDNALRAYNWGMGNVDKWIANGSNPAELPEETRAYTGKVHGFM
                     GDARNYYGTQGRLADSRPYQLSSSGGNPQITNSTHINTVNVNSNPQTVDALTKSIEAQS
                     KRSSTNSTFSSSVK"
     CDS             10989..11102
                     /codon_start=1
                     /product="hypothetical protein"
                     /label=hypothetical protein
                     /db_xref="SEED:fig|6666666.356842.peg.15"
                     /translation="MLMPDALVEVFNGYDFQQVVHICYGKLLLKVKIRGLS"
     CDS             complement(11189..11599)
                     /codon_start=1
                     /product="hypothetical protein"
                     /label=hypothetical protein
                     /db_xref="SEED:fig|6666666.356842.peg.16"
                     /translation="MARKEIPFIVETEGRDKGKEFLITEMSAWDADSLAQDIFRAMGDS
                     NYSKIPADVIAMGCAGLATVGLSVISASSPDVARQLRDRLMSTVDIVITHEGTLQQRKV
                     KGELDFEEVSTIRSLLDKVFKVNFDFLTIAGE"
     CDS             complement(11599..12033)
                     /codon_start=1
                     /product="Phage protein"
                     /label=Phage protein
                     /db_xref="SEED:fig|6666666.356842.peg.17"
                     /translation="MPIDITSANSKLRIVVPSYYPGGFDVDDYAADNMFETGALQNKED
                     MMSADGKYHAGFIFNPTEFTVNLMATSNASSLLDDWIAAERTAISAFACNATLTVPALG
                     AKWNFVNGVLYTWTPTPPGRRVLQPRPAVFHFETVTRSAI"
     CDS             complement(12044..13537)
                     /codon_start=1
                     /product="Phage protein"
                     /label=Phage protein
                     /db_xref="SEED:fig|6666666.356842.peg.18"
                     /translation="MSTIPLSVDFKITPNVVSPAGSAVDINGLILTDSELIPVGKVSVF
                     YQASEISALLGSTSKEYLAGSLYFGGYNNASVIPGQLLVSRLVTSAVAGYLLSASLKGV
                     TLASLQAIAAGTITLTVDGTAVTSSSIDLSTATSFSDIADKLETGIGSTKVAVEWNSIA
                     NRFIIRSLTTGDNSQVSYAANGVLATALKLTADTAATVSPGSDTVSMADMMDSIINTNQ
                     DWVGFMSVVELDDAKKTELCAWVSGQNNRFAYVVHDTSAAPTVANNSSCFYQQVVVANG
                     YESVFPVYGSYLYAVMPLAYGASLNFSRTNGRVSFKFRGFSGLSPNVSDKATALALKSN
                     GYNFYGSYSLNKTMAQYASDGAISGQYLWLDSFINQVWLNANLVSAFKSLFVDNDQSYP
                     FNDAGYASVQAAVIDVAQAAKNYGAIRTGVTLDSSQTRIVNNTVGKDISATLYSEGWYL
                     YIPTQTGSARIERDLKGVIFYYVDGQLIQSITMSSTAIL"
     CDS             complement(13534..14043)
                     /codon_start=1
                     /product="hypothetical protein"
                     /label=hypothetical protein
                     /db_xref="SEED:fig|6666666.356842.peg.19"
                     /translation="MNDFTVDNVIDVLANYIEPIAGICQQAQANRVPMPKGQFCILTPL
                     RFTRLSTTRDIKQDTGSPSTSAMGYTEVRQADIQVDIYGQGAGDRAIALETTFASGYGY
                     DTIKAIDARLAPLYSSPAIQAPMIDAESQWQERYMLTLSLQAHITVSFPQDYFDKVEST
                     IEQVDK"
     CDS             complement(14040..14411)
                     /codon_start=1
                     /product="Phage protein"
                     /label=Phage protein
                     /db_xref="SEED:fig|6666666.356842.peg.20"
                     /translation="MNLHKIANNAIRRVNPNIQAVLKKYAGETIGPGRKPTPTYQPDQN
                     VTIQLQPISRGDMQHVDGLNIQGLAKVIYVNGNYFSVQREMEQGGDIFVIGSEQWLVVE
                     PLELWPDWCRLIVVLQVSP"
     CDS             complement(14386..14850)
                     /codon_start=1
                     /product="hypothetical protein"
                     /label=hypothetical protein
                     /db_xref="SEED:fig|6666666.356842.peg.21"
                     /translation="MSDKILDALNNIGNGLANLQLKAGFIDRATYPDGTPVAMVAAIDE
                     YGNPANNQEPRPFFRNAIAHHEQEWADAISRGISNGIPIENVLSAVGEVIVGDVVQSIS
                     TLMDPPLKPSTVKARKYRGNTSTKPLVDTKVMIRDVHYEVGEIEPSQDSQ"
     CDS             complement(14856..15248)
                     /codon_start=1
                     /product="Phage protein"
                     /label=Phage protein
                     /db_xref="SEED:fig|6666666.356842.peg.22"
                     /translation="MGVVVLDPTEWKSKNPQYSALTDPQVEDLFFAAQMYLENTTLSVV
                     SDEAKRKYLLYLLTAHLAYLFYVDANGNGGVTGMVGRLSSASEGSVSVGSAMSNVPFNA
                     EFFLQSPYGFTFWQATKIYRMGFYRG"
     CDS             complement(15251..15571)
                     /codon_start=1
                     /product="hypothetical protein"
                     /label=hypothetical protein
                     /db_xref="SEED:fig|6666666.356842.peg.23"
                     /translation="MGNVVVGSKLMHGVVFEIGSEEIVVNGQNSNALVAVNGYTGVCGL
                     TSMPEEAWEAIKKKYGSMTAIQKGFIYAEKNESSANAASKEKAELQTGAEQAVLKESEK
                     DK"
     CDS             complement(15571..16602)
                     /codon_start=1
                     /product="Phage capsid and scaffold"
                     /label=Phage capsid and scaffold
                     /db_xref="SEED:fig|6666666.356842.peg.24"
                     /translation="MELNQSTLPQYLKVLTDKGVIFEKTPSYLVRNGIVGDSAVDMATV
                     ANGGIPAAAAQIIDPMIIKQLFAPTVATQLYPEVKKGNWAVQDVLFPRTEEAYEIVAYD
                     DRSRAGSTHVNTNWEQRRQMRFQGMNEWGDLEQEKYGMAMIPYVAMKQAAGVAAINRFF
                     NKSYMYGISGAPNFGIMNDPALPSALTPITTADGKIKWADKDAVAIFNDVKKMFTSLAA
                     KNQGLVQETTPMKLGVSPSDNASLGAINALGTASAIDLVKKTYPNLTVVVVPEFGTPSG
                     GLIQLIADNVGGEPTGNTVYTEKMRAFPVLVEHSMTSQKVAAGTLGAVIYRPSGVVQMT
                     GTL"
     CDS             complement(16602..17090)
                     /codon_start=1
                     /product="hypothetical protein"
                     /label=hypothetical protein
                     /db_xref="SEED:fig|6666666.356842.peg.25"
                     /translation="MTFQQSVTLYPSPGKEGDLASLNPTAVALPPEGSYKAGANGVYLA
                     RWVWVDGTDPTLVNNTGTGQPLGWVMNTGKGVIPLGSTGSMLVEPGTDLGVFTVGDFWV
                     RTATAATVGQKIFAVLADGTTKTGAAGATISGAVETSYWVASAADAGSIIKMTKQGVL"
     CDS             complement(17102..18343)
                     /codon_start=1
                     /product="Phage protein"
                     /label=Phage protein
                     /db_xref="SEED:fig|6666666.356842.peg.26"
                     /translation="MPVQQKDGKWYWGSKGPFDTREKAEEVEKAAYANGYGGDSYDMSS
                     SVRSFDDYGRMDIAKCNISKECVSEYRGSSLPGWQALGLNPDRTYYIYRPAEELIRAAD
                     SFNNVPVTIEHPTQLDTPDTPQQRVGATGSDTRFEAPYLVTSMKLWDKDAIHGVETATR
                     RELSIFPSFFELDMTPGEFMGQAYDGVARNITGNSVALTIKGRVGIECAIGDSQDREET
                     LMDGLTDLIKTKFAGASDSDADELAKGIMELMAQHEQKEIDGKKSGDESDKDEKKGGAS
                     GDEYDKEKDKDDKKSGDEEDEKDKDKKPMGDSAIRDLIAKATADATAAARREAAATREA
                     MRIVEPVYGHVTGDSADDIYQAVLKQEKVDLTGIHPSALKPLVQMAISRKTARSPVGDS
                     AVGTATEADFKEYF"
     CDS             complement(18379..18558)
                     /codon_start=1
                     /product="hypothetical protein"
                     /label=hypothetical protein
                     /db_xref="SEED:fig|6666666.356842.peg.27"
                     /translation="MIIELEDCEIATLRVALASFSEYLVEEGLSDDEHGKEMVRLYQMN
                     INSMLKKILNKQVA"
     CDS             complement(18578..19345)
                     /codon_start=1
                     /product="some similarities to plasmid-related proteins"
                     /label=some similarities to plasmid-related proteins
                     /db_xref="SEED:fig|6666666.356842.peg.28"
                     /translation="MKIKTLRRVRYSNELAGQYASSLKSLITRMVDSTNYWATAQYNAS
                     MQRNRGALDVAERIQEIREKWVLEFSESAVRIAPAFAQAADNFSTRALKGSLTAAEIPR
                     VKFTMTPQMEEAINEIVAENVSLIKSIPERYFTQVETITMESIRRGRDLQYMTEELQKQ
                     YGITRRRAENIALDQNNKACAQLARVRQKSLGITRGIWIHSGGGSHPRPLHVKAHGQEF
                     DLDEGLPVGDNGEYVLPGEEIHCGCSWKPVLPF"
     CDS             complement(19305..20795)
                     /codon_start=1
                     /product="Phage protein"
                     /label=Phage protein
                     /db_xref="SEED:fig|6666666.356842.peg.29"
                     /translation="MFKKLFNLLRPETAAPVPAPVVEKQSLKVGQSWVTDEQYQKDQID
                     KHFAAMKHQPYSAPKGVIPEGVVTGDSVDYSYLNNTFTQPDSVFMGYPVLANLAQKSEN
                     RIACEQSVNEIFRKGFKVKSNDTKANRDNIINQIEDAFEAFGIEKHLKKVGFNAEAFGN
                     SHLFVKLKGDENERDKELMIDPTKIKKGDIEGFRVVEPMWTYPQAYNAIDPISPDFFVP
                     QMWYVMGRMVHASRMKQLVLYSVPDMLKPSYNFGGLSLIQMMLPYVTNWESVRDDIPRI
                     IMSFRTYVWKTDMATYLQDRSEFNRRLDTLVYGKNNHGVLAIDQTLEELEQMNTALTGL
                     NDLLVQQQKLLCMPSRLSVTSMTGSQPSGMNASGEGERDAQHENVANKQKNGYKPLLDW
                     ILKLVCFNEFGEWYEDLYIDFNPLDEMSDKEIADINKTKAETYSILIADEVITPEQAHK
                     VLASDEDSGFNGVPYVKPVLIPGFDDEDKDTTPGSVQQ"
     CDS             complement(20800..22314)
                     /codon_start=1
                     /product="Phage terminase, large subunit"
                     /label=Phage terminase, large subunit
                     /db_xref="SEED:fig|6666666.356842.peg.30"
                     /translation="MAVAKTSLRKNSKILEAYRKRAIQDAQENLLDFTLYTNPLYETGW
                     FNELLCAELDNFQKEVEAGNMPRLMIFAPPRSGKSELASRRFPAKILGNHPDWNVIACS
                     YSSDLANRMSRDAQRIVGSKKYAEIFPDTLLPSSRTGAGGAIRTAELWEVVNAKGDIHG
                     GSYRAAGVNGGITGQGMNIGIIDDPAKDYKTASSPTYQEAVIDWYDTTFFTRADPKLNG
                     IIIILTRWHQSDLAGQLLKKAEEGGEQWRVVSFPMEAEKEEIHELNGKKYFLRQPGEIL
                     FPERMPQSFVDKAKQRGSLVWNALYQQRPTAKGGGLIKSEWFGEYRELPKLKWRAVYGD
                     TAQKTKEVNDFSVFEHWGLGDDGYLYLIDMIRGKWESDELKRRAVAFWAKCKTLKNGPL
                     RHLAIEDKASGTGLIQSIRKDALCPVKAIQRNKDKYTRLMDTQGYIESGYIKIPANADF
                     INDFLVEMEAINPEFNTHDDQLDPMMDAISEMKGRPQLLVGKDSGW"
     CDS             complement(22268..22921)
                     /codon_start=1
                     /product="Phage terminase, small subunit"
                     /label=Phage terminase, small subunit
                     /db_xref="SEED:fig|6666666.356842.peg.31"
                     /translation="MASKKLTAEQQQLFDALTPLQKKFSLAIIKGKNQTDAYRKAGGKA
                     KGDNLRKAAHQLATNIDVQAFIKSVQGEIVDEAIMGREEALKRLTSLGRMSLYDIAEFR
                     NGVIGEGEDGQPVIQASWSFKDSALLSPEALAAISELTAGPQGLKIKMHDPKVAIKQLA
                     EMQGWEAPKKNELSGPNGSPIQHEDMTDEQLKEALQELGYGRRKNQLEEKLENS"
     CDS             complement(23044..23247)
                     /codon_start=1
                     /product="hypothetical protein"
                     /label=hypothetical protein
                     /db_xref="SEED:fig|6666666.356842.peg.32"
                     /translation="MPVIVVTQSGSPATVQTSTESTAPATTTAAGIVKQMPFTAQLTAA
                     PTQADFNALLTKLINAGLMASS"
     CDS             complement(23257..23511)
                     /codon_start=1
                     /product="hypothetical protein"
                     /label=hypothetical protein
                     /db_xref="SEED:fig|6666666.356842.peg.33"
                     /translation="MQLLNVSAAAGVWTQVYDGTAASVIAVTGNENCQVCQSTTAPATN
                     LIGLPLIGGSPTQNLFRAVSGTPVYVKPLNAAVTVIVNA"
     CDS             complement(23521..23700)
                     /codon_start=1
                     /product="hypothetical protein"
                     /label=hypothetical protein
                     /db_xref="SEED:fig|6666666.356842.peg.34"
                     /translation="MPIISLSVEVKSRWWLPVYIKTLKLFCMMFQCEPDYEKVTAFIVK
                     HGISQKILVLPVKK"
     CDS             complement(23845..24123)
                     /codon_start=1
                     /product="hypothetical protein"
                     /label=hypothetical protein
                     /db_xref="SEED:fig|6666666.356842.peg.35"
                     /translation="MNIIRRAITWLLTKNETKTMTDQIVYVPVGDSQPAVPVEPQAQSQ
                     PAQDKQPSALDALKASFAAKVQFIESGLAVLGVEAEEELVALAEKYL"
     CDS             complement(24268..24564)
                     /codon_start=1
                     /product="hypothetical protein"
                     /label=hypothetical protein
                     /db_xref="SEED:fig|6666666.356842.peg.36"
                     /translation="MTELLSLFFGAKSFLLVTLGGIAAVVIAYFSGRKTGSVQTKAADD
                     VATAKEETRQAQQVVKTQAEISKVATDVKTANASVSDAAARNRMRTSKYNSDD"
     CDS             complement(24561..24893)
                     /codon_start=1
                     /product="hypothetical protein"
                     /label=hypothetical protein
                     /db_xref="SEED:fig|6666666.356842.peg.37"
                     /translation="MTLIIWFGGFALAVIALLLIRKFTPVEFVSHAALLHKTWSVRINA
                     IAFTIGGWLVAFPDSAMHAWAMLPPDIKSVLPANVLQIISYALIGASVLSQYVRQNKLT
                     PPEKPQ"
     CDS             complement(24890..25357)
                     /codon_start=1
                     /product="T4-like phage baseplate hub + tail lysozyme"
                     /label=T4-like phage baseplate hub + tail lysozyme
                     /db_xref="SEED:fig|6666666.356842.peg.38"
                     /translation="MSQIIPILRFEEAYKPKPYIDTEGFPTVGTGFKIGPKGAPLSNYT
                     FTIPQEVNDVWLQCLVNDTIAKMNTYPTIVAALKLCNEARRDVLISMAYQMGSGGLVGF
                     KNTLAMIAAGNFAGAADGMLNSLWAKQTPARAKRHSDVMCSGNMNAYAGLL"
     CDS             complement(25364..25669)
                     /codon_start=1
                     /product="hypothetical protein"
                     /label=hypothetical protein
                     /db_xref="SEED:fig|6666666.356842.peg.39"
                     /translation="MKPIKFQWRGHHFSFDYVPLIFLALITFALGKADSLTKTNSESLK
                     LIADLNRQRTAAEMRALNAEKGNPSTAGLNVIVISPDGTRQKNIPAKSFADVNQPL"
     CDS             complement(25656..25961)
                     /codon_start=1
                     /product="hypothetical protein"
                     /label=hypothetical protein
                     /db_xref="SEED:fig|6666666.356842.peg.40"
                     /translation="MANETDLVSALLLALVMTLLGSLAKYAYANRPGEQKRSLRDHVFV
                     SLFAGMMMFFFGLANGWSQAFIILGCGLGGWQGASIIRRINPPGLGSGKDGNDETN"
     CDS             complement(26261..26515)
                     /codon_start=1
                     /product="hypothetical protein"
                     /label=hypothetical protein
                     /db_xref="SEED:fig|6666666.356842.peg.41"
                     /translation="MSDLPSIPTNDVFREFCIVLRIHKDKEYIQSLFESKGWDVSRAKI
                     HAWSRKSGAFNPDFRPMPEEALRDFIDAYKLDRERRGKE"
     CDS             complement(26508..26975)
                     /codon_start=1
                     /product="hypothetical protein"
                     /label=hypothetical protein
                     /db_xref="SEED:fig|6666666.356842.peg.42"
                     /translation="MKTINATSSFSDVKNAAEALNLSVSVSSADMFELWSGDRYQGGFS
                     QLAQLINELNIRIETVNLKKESESRKTDELKNSLTGATPAAVLQHGKVIGMCTTVERNG
                     GYIDVAGGFSSDATPVNVVSLKISRSQKNMGKAKTMESYMPKLYEGRIIYV"
     CDS             complement(27214..27750)
                     /codon_start=1
                     /product="Phage antitermination protein Q"
                     /label=Phage antitermination protein Q
                     /db_xref="SEED:fig|6666666.356842.peg.43"
                     /translation="MTDELKLTQEQKYWLQPILEQFGAWVYSGRLDRRQTSIISQFMAR
                     MRPAEYPSRPMCSDDDGRLISAIWDEMYATSRTAWVLIFCRYVYGSSDRHLARVYRDTL
                     MIGDDSAAAKNDSVKCLMSLRESAHRRIDVPSISTCRRESLALIESAEMLVYLRLTEAL
                     EERDRLNTQRGKINV"
     CDS             complement(27747..27899)
                     /codon_start=1
                     /product="hypothetical protein"
                     /label=hypothetical protein
                     /db_xref="SEED:fig|6666666.356842.peg.44"
                     /translation="MRGRMTHTNHVTDTLRLRWCRLRIYRYAGSVVIDYRILRNYQKTL
                     GRAGA"
     CDS             complement(27884..28240)
                     /codon_start=1
                     /product="hypothetical protein"
                     /label=hypothetical protein
                     /db_xref="SEED:fig|6666666.356842.peg.45"
                     /translation="MKTYDITPIGKPRMTQRDKWQKRPPVLRYRAFCDEVRLNKITLPE
                     SGWHVTFVIPMPVSWSKKKRAEMNGKPHQQKPDKDNLEKALLDAIFDDDSRVWDGRVSK
                     IWGEVGQIIICEAA"
     CDS             complement(28237..28521)
                     /codon_start=1
                     /product="hypothetical protein"
                     /label=hypothetical protein
                     /db_xref="SEED:fig|6666666.356842.peg.46"
                     /translation="MKTIYRSKEWLAAVGSIQRCVLCGAWGTQVAHRNEGKGMGIKADD
                     CATAALCTVCHTEIDNGKNLTREERRQQMDRAIVLTVIQIARLGLVVPK"
     CDS             complement(28518..29291)
                     /codon_start=1
                     /product="SCP1.16c, unknown, len: 194aa"
                     /label=SCP1.16c, unknown, len: 194aa
                     /db_xref="SEED:fig|6666666.356842.peg.47"
                     /translation="MMNQKIQELISAGAIFYVSHSGGKDSQAMYALLSEHIPHNQIVVI
                     HASLGDVEWPGVIEHIKENTTHDLNIVQAGKNLLGMVKSRGKWPSASFRQCTSDLKRGP
                     IQKFIRQDIKRRGGGIAVNCMGLRSQESAARAKRNPLSLNKSQSVRGRDVYDWLPVFDL
                     TTEQVFETIASAGQKPHWAYSTGNERLSCMFCIMGSLNDLRNAATLNPYLYRRYISLER
                     DIGHTMFTKGGKPIWLDEYVGIPVTNIDCDKGAAA"
     CDS             complement(29288..29881)
                     /codon_start=1
                     /product="Phage protein"
                     /label=Phage protein
                     /db_xref="SEED:fig|6666666.356842.peg.48"
                     /translation="MAQLSLVKSPGGILVPSTSDTRIYVDRLTIGAVICAEFKKTRNPA
                     FHRKYFSLLGLGFDYWEPVGGAVSQSERDFVRGFVRYLASYAGAEDAISAVADEYIETT
                     GRQRAANISATKSFDAFRRWVTVEAGHYDAYIMPDGSIQKEARSVSFAKMDDLEFNDLY
                     RATLDVLWNFILRRSFPSQQSAENAAAQLLEYAA"
     CDS             complement(29915..30265)
                     /codon_start=1
                     /product="hypothetical protein"
                     /label=hypothetical protein
                     /db_xref="SEED:fig|6666666.356842.peg.49"
                     /translation="MSDHTEKNGLQSANNGFKNTVHKYSFNDFMADNTEKFEVEIPTGG
                     YVVIRCADRAIVAAFDEFPTCERALMYRRGDLVSFMPLQADEIIGTPRLLTQLLQKAGY
                     TVTGSDNIKSSA"
     CDS             complement(30449..30928)
                     /codon_start=1
                     /product="Methyltransferase (EC 2.1.1.-)"
                     /label=Methyltransferase
                     /db_xref="SEED:fig|6666666.356842.peg.50"
                     /translation="MPDTLQILDMCCGSKMFWFDKQDARAVFCDIRNEQHVLCDGRSLV
                     ISPDIITDFRALPFPDESFPVVVFDPPHLERVGENAWMGKKYGRLNRDTWRDDLCAGFT
                     EGFRVLRQGGVFIFKWSETQIPVGQVLALTDEKPVIWQRTGKNDKTHWVVFVKTA"
     CDS             complement(30921..31331)
                     /codon_start=1
                     /product="hypothetical protein"
                     /label=hypothetical protein
                     /db_xref="SEED:fig|6666666.356842.peg.51"
                     /translation="MKALSIRQPWAWLIVNGFKDIENRSWHTKYRGPVLIHASKGLTRK
                     EYDEACATIVDRLISVDIPDFDDLQRGGIIGYATITGTCEGSSSPWFFGPVGFQLASAR
                     SLPLHPLRGRLGFFDTRLTLAGDRLVKEVDHA"
     CDS             complement(31328..31447)
                     /codon_start=1
                     /product="hypothetical protein"
                     /label=hypothetical protein
                     /db_xref="SEED:fig|6666666.356842.peg.52"
                     /translation="MSSGERIRVKETPDEILVLAAQNASDAEVKFWTELGDKK"
     CDS             complement(31588..32403)
                     /codon_start=1
                     /product="Phage protein"
                     /label=Phage protein
                     /db_xref="SEED:fig|6666666.356842.peg.53"
                     /translation="MTNDKTTQSRIAEAVELLKQAAPQMLAQKGPLDTSPEISREESPD
                     AALCDFYDANSWTELVRGLVNHVEQLQETVKRNVKPWDDTFPPTLLPAYIERIKQADAA
                     ARAAIAANSPVIPDGWNWTDEQCLEFLSVAFRHCEIKGDVAFDEIRQGVQFALAAAPQP
                     DQVGAAVRDVIAERQRQITTEGWTPEHDDEHVGFEMSFAASTYILHIAQSYGGQPYKHI
                     APSEIWPWDLKWLKFTPGPRRSLVKAAALIVAEIERIDRCALQNKGGEA"
     CDS             complement(32393..33157)
                     /codon_start=1
                     /product="Phage EaA2 protein"
                     /label=Phage EaA2 protein
                     /db_xref="SEED:fig|6666666.356842.peg.54"
                     /translation="MNISIERLEEICNWDGCLASIPEANQMAEELLALRQAQQEPFMYA
                     VRCPYGSPWIDSDYVGDASEKEMVERAVKSLNETIHPADPKKYEVVALYTSPVITHSEL
                     WCPHSDPITGDQFFLWMEHPDLGYVPTYGGPYDSFTLTERDGNSDFFRHRYDHDAGAWV
                     DDEAVYLPDDSEEQPTPPAPAVPDNQMSGNSEQLKPLLDTAKLFNKFYERYPQETFACD
                     SDRAQAAGYFMSGAEIQCFGEYIDRGETSYDE"
     CDS             complement(33154..33450)
                     /codon_start=1
                     /product="hypothetical protein"
                     /label=hypothetical protein
                     /db_xref="SEED:fig|6666666.356842.peg.55"
                     /translation="MKKSAEITQQRVAEYIKSNPGSTTSEIADGLGRVKSTVRFAVRHL
                     VDAGIVSVHQPEIGPNRHYAASNAPVVQHRFGVNRLVNLFDRCVMNVRRGYAA"
     CDS             complement(33479..34183)
                     /codon_start=1
                     /product="Origin specific replication binding factor 
                     #replication protein P"
                     /label=Origin specific replication binding factor #rep
                     /db_xref="SEED:fig|6666666.356842.peg.56"
                     /translation="MKNVGNSLQNMGREQFSRMAASMPVQKSAARVTEQTSQVFNGLFR
                     QLRVMFPASIANIKTQADLDEFRRQWSLAFAENGITTLEQVNAGMRIARQQERPFLPSP
                     GQFVAWCREGYQQLAGLPDVDGLIAMVRAYSIRRGYYDSAEDYPWKHPAQYWMVTALYG
                     GMRANNWTDAELRQRAAGELAMMAARIQQGEQIPAPRVMIPVLGGKPLSKRDGLAKIAE
                     LREKHGLRRHDA"
     CDS             complement(34180..35001)
                     /codon_start=1
                     /product="Primosomal protein I"
                     /label=Primosomal protein I
                     /db_xref="SEED:fig|6666666.356842.peg.57"
                     /translation="MAGDWIKMRSDLHTHPKVVRIASALNADRLRVVGALHAAWCLFDA
                     HSVDGSLDGYNSKTLDDMIAFPGFSHAMIAVGWLEECESSLCMPRFFEHNGQGAKRRAQ
                     EAERKRNIRKASASDADKKRTREEKRREEVKDQTPLVARDENLPSQENTGPPEQPKTPV
                     YLDGVQEPIGVFSMHSGWQPSPDFRQRAATWGVILPEPAYLPTELAEFVDFWQPTGKAY
                     HQTQWEQKLARHVQRTRTAKPAAPAGRQALDWDNADWIEPIAGQIPIGGNS"
     CDS             complement(35007..35642)
                     /codon_start=1
                     /product="Phage protein"
                     /label=Phage protein
                     /db_xref="SEED:fig|6666666.356842.peg.58"
                     /translation="MTAITVSLKEILDAGACKDGLLRALCARGKITVEQRDELIEDDDI
                     DDADELPEEILNLADNERFAAASVVTAEYITDAIWALRIRPEHKNLWRKYAIWCARQVQ
                     HLMTDERSRNALDVAWRHASGQATDEELSAAYAAAYAAAYAAYAARAAARAAAYAAAYA
                     AAAGAAAGAAAYAAYAARAAARAAADADARETQTKKLIEILTAGGWTE"
     CDS             complement(35665..36174)
                     /codon_start=1
                     /product="hypothetical protein"
                     /label=hypothetical protein
                     /db_xref="SEED:fig|6666666.356842.peg.59"
                     /translation="MQHAVTEFKQPGALVPIYPNQPRLSHENIRNAVRAWAANWRSREA
                     VAAEIVNRWREQGGTGLDIPEDNYLQMQKLFRWLDSDSEYARQQIAALTPSILAVMPSQ
                     FRLWLVQPNDRLALLSVAMRACSDVFNAALLGAPAREFELKLSAGISSLMRLRDDQRAH
                     VQSIEF"
     CDS             complement(36178..36408)
                     /codon_start=1
                     /product="hypothetical protein"
                     /label=hypothetical protein
                     /db_xref="SEED:fig|6666666.356842.peg.60"
                     /translation="MTALDNAIQAAGSARKLGAAVGVTGMAISRWKTKYAGIVPASRVL
                     QIYHVTGVTPHELRPDLYPNPTDGLPQQQEL"
     CDS             36480..36905
                     /codon_start=1
                     /product="putative DNA-binding protein"
                     /label=putative DNA-binding protein
                     /db_xref="SEED:fig|6666666.356842.peg.61"
                     /translation="MSKPDAYNVLMRKNDGIDTQLISRLTEITERGISKADMARIAGIT
                     PQAVNGWFKKGVISKKSAVAVAEAAGVSVAWLLGEKVDEENGLKEREREMLQLFRQFPE
                     AEQDKMITLFQLRLKELDDYVEKYLRGRYKLIDIKDE"
     CDS             37377..37556
                     /codon_start=1
                     /product="hypothetical protein"
                     /label=hypothetical protein
                     /db_xref="SEED:fig|6666666.356842.peg.62"
                     /translation="MSDLEFIGSVYLSEAIAVLVLAMTGGTTKPGRVIAELWGLTTALI
                     VILAVIAKTIEWAL"
     CDS             37553..37672
                     /codon_start=1
                     /product="hypothetical protein"
                     /label=hypothetical protein
                     /db_xref="SEED:fig|6666666.356842.peg.63"
                     /translation="MNIRQFRRAQRLANQAVQQRSSKKWSVANALMARAAERK"
     CDS             37672..37857
                     /codon_start=1
                     /product="hypothetical protein"
                     /label=hypothetical protein
                     /db_xref="SEED:fig|6666666.356842.peg.64"
                     /translation="MGTMFALVIAICSTHGDCDPAVTGVYDSQQECELAMYEERILNGE
                     CYPIERIIHQADDQQP"
     CDS             37971..38102
                     /codon_start=1
                     /product="hypothetical protein"
                     /label=hypothetical protein
                     /db_xref="SEED:fig|6666666.356842.peg.65"
                     /translation="MGKRSQAQTLPASRDARLRWGDSAGFSALSVVVNALNFPSASR"
     CDS             38242..38388
                     /codon_start=1
                     /product="hypothetical protein"
                     /label=hypothetical protein
                     /db_xref="SEED:fig|6666666.356842.peg.66"
                     /translation="MSEPEAGDQHRPPQLHSQPAPAPATANKTQKPAQGGFVRRLADQS
                     RSV"
     CDS             38449..39384
                     /codon_start=1
                     /product="Phage protein"
                     /label=Phage protein
                     /db_xref="SEED:fig|6666666.356842.peg.67"
                     /translation="MNMSTEIAVVEIKPEQAPAIFIPGGLDAYLEQIRQSVNEVPDLST
                     KKGRDRVASLAAQVSRSKTAIEKPGREYLRRLKEAVKPAEAEIKRFVDACDALRDLTRR
                     PLTDWEHEQERIAAENQMLAWHEEAIEMNTAFDKALAERIDSDHEIALLLNDKFDRDLA
                     EAKAEAERQRIAHEEELKRQVEEQAKREAAAAAQREIDAAADRERDALLAKERAERERQ
                     EAVEAERRKAQEEVDRIKREAEAKEAARLAEEKRIADENAARSADVEHRRVINRSIVAD
                     LIAAGIPDEFATQVVRAIASGNVRNAKINY"
     CDS             39402..39596
                     /codon_start=1
                     /product="hypothetical protein"
                     /label=hypothetical protein
                     /db_xref="SEED:fig|6666666.356842.peg.68"
                     /translation="MKYKSAFRHFSSRGVSIIWHRLNVSMAKECRIRGYRREAAHYLMM
                     AAHSRADIQYFLPTGKEPF"
     CDS             39607..40461
                     /codon_start=1
                     /product="DNA, complete sequence"
                     /label=DNA, complete sequence
                     /db_xref="SEED:fig|6666666.356842.peg.69"
                     /translation="MKFEKAMRKKAKLRLALTGPSGSGKTYSALMICKSMGGKTAVIDT
                     EKGSASLYSNEFDFDVLELDPPFSPERFIEAIGAAEAAGYDNLIIDSISHEWSGVGGCL
                     DDLDTIAKTKFKGNTHAAWSALTPRHRKFLDAILRVNCHLVATMRSKTETAQQEGSKKV
                     VKLGMKTEQRDGVEYEFTTVLDINHETHTAMASKDRTGLFSNADYTVLDETVGKRLMGW
                     LNDGRSKAEIDLAHFVTTAESAPSFEQLKSAWAEAFRTLRDTPEQAKAQEVYEARKAEL
                     TRN"
     CDS             40474..41067
                     /codon_start=1
                     /product="Single-stranded DNA-binding protein"
                     /label=Single-stranded DNA-binding protein
                     /db_xref="SEED:fig|6666666.356842.peg.70"
                     /db_xref="GO:0003697"
                     /translation="MASKGVNKVILIGNLGQDPEVRYMPNGGAVANLTLATSDSWRDKQ
                     TGEQKERTEWHRVALYGKLAEIAGEYLRKGSQVYIEGQLRTRKWQDQSGQDRYTTEVVV
                     DISGSMQMLGGRTGGGAPAGGNMGGNMGGGNALQGGWGQPQQPQQANQFSGGGQPRPQQ
                     SAPMPGNEPPIDFDDDIPFAPIGLQFNRHSIHSI"
     CDS             41136..41366
                     /codon_start=1
                     /product="hypothetical protein"
                     /label=hypothetical protein
                     /db_xref="SEED:fig|6666666.356842.peg.71"
                     /translation="MMLEYQLDEKTKSDAIKKIQLGFVGDLKKESKYERWLKTIVYKTS
                     FYPLPKQDNDFFIQDSFGKYRGYGQNRRMGD"
     CDS             41419..41577
                     /codon_start=1
                     /product="hypothetical protein"
                     /label=hypothetical protein
                     /db_xref="SEED:fig|6666666.356842.peg.72"
                     /translation="MKTSRDSIIVGKVEIVYSTSKNGWITPGGQIIRNPLKAQRIAENL
                     NGKQVMA"
     CDS             41574..41825
                     /codon_start=1
                     /product="Adenine DNA methyltransferase, phage-associated"
                     /label=Adenine DNA methyltransferase, phage-associated
                     /db_xref="SEED:fig|6666666.356842.peg.73"
                     /translation="MSTKYSLIYADPPWSYGNNASNGAARDHYETMSLTDLKRLPIWSL
                     AEENAVLAMWYTGTHNQEAIELAEAWGFHVRTMKGFSA"
     CDS             41822..42457
                     /codon_start=1
                     /product="Phage-related protein"
                     /label=Phage-related protein
                     /db_xref="SEED:fig|6666666.356842.peg.74"
                     /translation="MKERGMIFNAEMVRAILCGRKTQTRRIMKPQREGPNWSVKPAQSP
                     MTKGHTHDWWLPNGTLPYSALPRCPYGVIGDRIWVRETCRAVEIESGLDVVRYDADGLD
                     IPVKSHPLDAGLWVDLYRYRSGKGKQVPSIHMPRWASRITLEITGVRVERLHAITLGDI
                     CKEFGCGLYDFRPATYGFTAWEELWKSIYGEESWQANPWVWVIEFKRI"
     CDS             42522..42710
                     /codon_start=1
                     /product="hypothetical protein"
                     /label=hypothetical protein
                     /db_xref="SEED:fig|6666666.356842.peg.75"
                     /translation="MHKKWMPGVNLLSEFDLKMGRLSYSVRNRTLTQQDIDNACADADE
                     IIKSLERNNGKRIFKQR"
     CDS             42682..42903
                     /codon_start=1
                     /product="hypothetical protein"
                     /label=hypothetical protein
                     /db_xref="SEED:fig|6666666.356842.peg.76"
                     /translation="MGSEFLSKDDLVYLTGHIYPSKQIEVLRRAGISFIPNRDGHPRTT
                     WTHVNAVLNGTPAPELEDDDIGINFNGI"
     CDS             42909..43925
                     /codon_start=1
                     /product="Integrase"
                     /label=Integrase
                     /db_xref="SEED:fig|6666666.356842.peg.77"
                     /translation="MGRKRINPEDNKLPPRVRKNKYSYIFKPAKTKETITLGKIRDLSI
                     AQVWEKYEKIISSKRDVMTFGKLWGFFLDSEYYKDLSPRTQSDYLQHQKKLLHAFGNAK
                     ADAIKPEHVRRYLDIRGKSSRTQANQEKSSMSRVFRWGYERGYVKSNPCAGISKFTVKS
                     RTTYIDDSEYVAIYKEATPALQCAMEIAYLCAARIGDVQDLEWSQETELGLFVQQGKTG
                     VRQIKVYSDRLRAALDQARTLGGARHIIVNKFKEKYSYKGLNTLWVNARREASQKLGYE
                     LTCHFHDIKAKGISDYEGSSRDKQIFSGHKTEAQVITYDRKTKISPTLDLPLIDDDE"
     tRNA            complement(44031..44115)
                     /product="tRNA-Ser-TGA"
                     /note="/transl_table=11"
                     /db_xref="SEED:fig|6666666.356842.rna.1"
     CDS             44351..45010
                     /codon_start=1
                     /product="Putative TEGT family carrier/transport protein"
                     /label=Putative TEGT family carrier/transport protein
                     /db_xref="SEED:fig|6666666.356842.peg.78"
                     /translation="MDRIIASSTREQSLLSTHKVLRNTYFLLSLTLGFSAVTATLSTML
                     NLPSPGFLLTIIGFYGLMFLTYRLADRPAGILATFALTGFMGYTLGPLLNAMIAAGAGD
                     IIMLALGGTALVFFCCSAYVLTTRKDMSFLSGMLMAGFVVLLVATIANLFLHLPGLHLA
                     ISAMFILFSAGAILWETSNIIHGGETNYIRATVSLYVSIYNLFVSLLSLLGMSRSE"
     CDS             complement(45123..45482)
                     /codon_start=1
                     /product="Transcriptional regulator, HxlR family"
                     /label=Transcriptional regulator, HxlR family
                     /db_xref="SEED:fig|6666666.356842.peg.79"
                     /translation="MAILRQASAEVQSTERCPMVDFVNLISGKWAIPILYRLIIIDKPM
                     RFSDLQRAVAPITQKELTRQLRLFELRGLVCRTVYAEVPPRVEYEITALGKTLRDTLDS
                     LADWMRAYGDRLIRQ"
     CDS             45583..46332
                     /codon_start=1
                     /product="Oxidoreductase"
                     /label=Oxidoreductase
                     /db_xref="SEED:fig|6666666.356842.peg.80"
                     /translation="MPRLQDKYTLITGGTSGIGLETARQFLKEGAMVAITGRNQESLSA
                     AGRELGDTVLLLQSDAGDMADQRTLAKQIAQHWPRLDVLYVNAGDVSHRPLQEWDEATY
                     DRLMDTNLKGPFFLIQSLLPLLANPSSVILCGSVSAHIGLPQSSVYAASKAGLLSLART
                     LSGELAGRGIRVNGLSPGPTETAALGKLGLPPQEEDALREQIKNLVPIGRLGTPWELAK
                     AAVFLACDESSFIVGTELQVDGGVSNL"
     CDS             46431..46760
                     /codon_start=1
                     /product="tRNA 2-thiouridine synthesizing protein E (EC 
                     2.8.1.-)"
                     /label=tRNA 2-thiouridine synthesizing protein E
                     /db_xref="SEED:fig|6666666.356842.peg.81"
                     /translation="MLEFEGKVIETDAQGYLKDSSDWQEDMAPLLAEQEGITLTEAHWE
                     VVRFVRAFYLEFNTSPAIRMLVKAMAQKYGEEKGNSRYLYRLFPKGPAKQATKIAGLPK
                     PVKCI"
ORIGIN
        1 tggcggagga gtagagattc gaactctaga acgctttcgc gtcgccggtt ttcaagaccg
       61 gcacttacaa cttttaaaat caataagttg tggtgttttg ttggtatata cctttaaatt
      121 acacatttaa atatcattaa cttatatggt cttaaaatga aaaataccaa tacattaagc
      181 gattaataat tcgattaatt atcatgttct ctaagctttt ttctactctt agggatgcgc
      241 aatcgcgcac accgtaaacc gccatcttgc ctaacttttc atcaaggcgc gccgccgatt
      301 gggaattgta cgcttccccg gtatcaacta ggatcagtga tgacaggtca atgtgtgcca
      361 gcgggatttt cttgaatctg ttatgcctga cacaccatac ccaaccacca ccgataacta
      421 ctcgaccatt aaactctgta aatgataatg gcctggctgt atttaatatg cctatcattc
      481 cagtggcggg caaaattcca tacataaaat tttcatggtt aaaatcgtct ccttttattt
      541 tttgcattga aatagttttc atgcaccaga taataaaaat aaaattaatc aaattccagt
      601 caatgaaaat aaacacaaaa ccccaagctg ataaaactgg tattaatgca atgtatttta
      661 atctcatttt attaccagag ttttttgggg cgttaccgcc ccttgaagta tttaatcgaa
      721 cttgtcttgt agatttacta atgggacgga tatagagcaa tcaaaattaa ttagctccga
      781 ctcatctttg cttcctgcgt caaccccggc tttgacagat ttcaacagta cgactttcgc
      841 cttgacgtta ccaataatgt caccggccgc caatttccat gcggccgcat tgctaagaat
      901 gctggaaacc aggtcttgca acacccatgc cccaccggag gatgagacca ttgcattcag
      961 cattgacggc acatacgcgc tattggctga gtattgctcc gcctcatgat actgacacca
     1021 ccatgtattg gcctcttcgt cagagtatgg caatttcact gccttagcgg cggtctcgcc
     1081 attcgcttgg atcaatgcca gcttttgctc ataaatctgt tcaatagtcg gcggcgggaa
     1141 tgattctgcg ctcggcggta ccgtattcca gttaatgatg tcggcggcta aaagttgctg
     1201 ccatagctca tcactgatcg gtattgcgtc gtcaggaata cccccaatgt tgtcgtcata
     1261 aaaccctttt ttcgatggtg atacgtattt acccatttta ataccctatc gcgatatatg
     1321 ttatcgcagt cgcctgcggt tttgttgtta cgcccgtaaa accatttacg gccgcactag
     1381 ttgctgacac tcgataattt gcggatgtgt ctgcgtcatt aggactcata acaatgccca
     1441 aacaaattgt gggaaatacc gatgcaaata gtattgacgt accgccgcta gcatttagcg
     1501 tttttgaacc ccattgaatg atcagtccgc ccggaacatc tggtatacgg atagaatccc
     1561 cagcgataaa tgatcttttt ggcaataatg cagtcagcgc ggcttgcaca aacgcagtgg
     1621 ttgccagctg ggttgtgctg gttcctgttg cagcggtcgg cgcagttggc gtgccggtta
     1681 atgcaggact ggcgagcgga gccagcaggt cggtaatcgc atgcacgaac gccgtagtag
     1741 cgatttgcgt ggtgctggtt ccggttgcgg ccgtgggggc agtgggtacg ccggtcagtg
     1801 ctgggctaga tgatggcgcg ccacccaaga atgataataa attcaaccac cccgtggata
     1861 ctgaattggg gttgtttgtg tttgcatcag cagtgcttac gtaaattgtt gtgccgtcat
     1921 cgctcaataa taccgccccc tttggataac cggcgattgc cgtggcaaat gtagcatcaa
     1981 aggtgttaag cgatccggca gaaagccatc gacctatcgc ggaaagctcg aacaggatct
     2041 ggttcatgtc ctgccctttt ggaggccggc cgcccgctga tttgagaatc attgttacgg
     2101 gcgggaaacc aacatcataa gatgcctgat tgtctccggc gggggttgta gcaagcaaat
     2161 cctcacgcga accattgata ccaaaaggta ccggttgttt ttttggtgca tctgtgcgat
     2221 tcatatttgg tctctagaaa aaggtgccgt cattgaatgg ataggcatca acagaaaatc
     2281 cgaaatacgg tggaacaatc tgagtgatgt ttaattgcac cccgcttggt acgggaacaa
     2341 catcataatt agtgagaatg gacacttcat atggagccaa tgcgaactca aaagtaatgc
     2401 caattgccat atctcgataa ttgacacaat aagccctacc gcgaccagaa aataaaattt
     2461 taataaatct gtttatttcc gggatcgtcg caatggagat gtttgagaat gccttgcaca
     2521 taattaatgt gcgataagca tcatcaccaa gcctgaccgt ttctgtctct tgtattcctg
     2581 cataaaatgg ctcctggttg aatggggacg gatattcatt ttcatcaccg ctatctgact
     2641 cataaaaacc gaagctgttt gtgctgattt ccgctttaac ataccgggat accccgacaa
     2701 ttttacccca tacatcaagg ccaaaagatt cgcaggtggt taaatcccat acttttgtta
     2761 tgaattcgtc ggtaaaatca tccaggctga cggcctgatt aaatgtgtcg atgatgttca
     2821 acagcctggt gctagctgaa tactgcgtga gtattgtctg attccatgtc atgacagcac
     2881 caccgtgata ttagatgcct gaattgtcgg aacctgatca atccccatgg tcactgatgg
     2941 agtaaacgtc acgccatcag gggagacctc aagcgacagg atacctacgc tatcaggaga
     3001 gattgaaatg accggggcat agtatttacc agcattgatt gtcgcgccga ttctcgcttt
     3061 aacgatgccg tcataattgc cattaaacac ggtctgcacc atggtcttaa cctgcgacgt
     3121 gatatcgctg ggagggttca ggctgccgtc cagggtaatc ttgaaataaa caggcgtcgg
     3181 agtggctttt tgccattgca tgacgtactc aggatagggt gcctcataat tcatgctgtc
     3241 ataaacggta tgagttgcac taccgttgaa attgcacccg gggttatacg tgccaaaaat
     3301 ggcctcggca acatcagcgt cggccccgcc atagacacag atccagatgg aatgtgctgc
     3361 gacagaaacg ttcgtttccc ccttaattac tgcggcagca gtcctatttg accagacata
     3421 agcgtcaagt acgttagttg tagccagaag ggctgccagc gtggccccat cctgattacg
     3481 ggccttacgc gaaaccgact gttttctacg agtttcgaac gcgattcggc tttcaacatt
     3541 gacgccaaca acaccagccg tcgagttgtt gactgaatcc catcctgata ccgcccggta
     3601 aatctggttt aactgtccgg ccccgcaagc aattggcccc gtagtctggc atgtaaactg
     3661 cacatctaca gtgccggatg tcgggatagt tgcaggatca gaggtggcat agatgtatcc
     3721 gttgacgtca atagcggtac tgccagcggg gatgattgtc cccaccagcc cgacgcattg
     3781 cgcggtgaca accgtcccct gtgcggaaat gcggtccatg aaatagatgc ggcctatgcc
     3841 gtcctgccag cgcccggttg cgtaatcagg gttgacctgg ttaaacaggc aaagcagttt
     3901 gtcatattcc tgggcaataa tttctgtgtc ggattgagct atctggcctt gcggtgagct
     3961 aagagactga cttgcaccac cacccagcgc ggttgtcatg tcggttaatc ggccggccag
     4021 cacatctgat acgtccggta ccaaaaggcc attctcagtg atggtgacat ctggaacggc
     4081 tgtatttaat gtcgtcataa attaacctgt gctgtattcc cgtctgtatc tgtcacgcgt
     4141 atcgttccgc gcattctgcg ggtatttttg tcaaagaaga cgcttgccag tgcctggtca
     4201 acgatgggga gtttcttcgc ttcggtctgc attttttgcg ccacatagcc aggtgtaggc
     4261 cgcttgccaa gaacctcttc tttccatggg acgccgagcg tgttgtcgta gtagcactca
     4321 ccggagaaca caagacaggc actggcaaca tcctgagcta ccgcgtatga accgtcagca
     4381 atagccaggt tgccgctgcc atccagcgtc aaatcccaat tgctggtatc taactgcatg
     4441 gttttgtatg tcatgccgga ttatccgttg tattagatgt taccgttgag ctgccaccct
     4501 gcacgccaga aacggcgtgt cgatgagtgt cgtatttatc tcgcagggtt tttagagatg
     4561 cgctctgagt gccgttgttg tcggtaatat tcccaccggc agtgatatct cccgtgacgt
     4621 gcattgttgg tgttgtgacg tttacaccat cgggagcagt gatatttgcc gatgagcaat
     4681 gaatattgac cggattaggt gttgtgatgt ttatagcccc atcggaaaac tctatatatt
     4741 gagtcggctg agcattcagg aatccaccga gataaagcgc atcagattta ctgtgcatac
     4801 gcttactacc tggaactgac tgctttctgt ttgctctggc aattgagttg tcacgatcac
     4861 aaattgcgat cataccaata tcaccaacca ccggatccat gatgactgcg ctatttcccc
     4921 tctggagccg ccacaccggg acattgtaaa taggcgagtt atcaatcatt gcgccgctag
     4981 ggtctgtccg ggtaactagt gggagtacgt caacaaccag atttggtgcc gaaccacgaa
     5041 tagcaatcac ctgagctatc tcaataaaaa aagccccctg aaggagcttt tgaaatatgt
     5101 actgtaatga ctcagaatcg ctagtttgcg gcgcgatcgg cgtgaataga ttatcagcca
     5161 ctattattac cctctatagc ccggttcgct atgcagacag aatgccacgg tccatcgctg
     5221 agccatgacg ataattcatg cgtaacacta gttaatttgt atgtgccgct ggcatgtggt
     5281 agtgacgttt ttatctgtac gtttctgccg gtggttagca gtgttgaaaa ttgtgtctgg
     5341 aacatcagtc cgccgttcga aaaaaccgga tatccaatta atccgtggtc gggagatatc
     5401 agcggcgtaa catcatcttt gacgctattt tgcggccaaa acaaaatggt cggcggcatg
     5461 atggacattg aaatacccat cgcatcgcac agtgactgta gctgatcaaa tacgctacct
     5521 tcgtagtagg ggttagttac taccattcca tcaagcccaa taatattgga cgtgtatcca
     5581 cccgatttgc aaatagcatt tattgcgtca gctactggag ttggcccgtt aaatgaaaat
     5641 ggcgacgcca ctttattttg caggtcagca ttcgctgttg ccgtaatcat taatgcagca
     5701 ttggggacgg aattcatatt ggcaatggat gatgtcatat agccggtgaa aattgctgta
     5761 tcaccaacaa atattttcat gctgattcgt tcagtatcgc taccaaatag ccccatggct
     5821 tttgatgaca gagacgcaag cagatcaagg ctaagtccga aaatgctcac actcacctgc
     5881 gtgccgaaca ggttccccga tgactggcag gagagagagg cgcgagcctc gctgattgaa
     5941 attttattgt tgcccgattt gtcgaatgat gacgtttcgc tgacgaaatc gaatcggagt
     6001 gattttttat tgtacaagct cggatgcctc tatgtaatag agcgtgaatc taccgccgag
     6061 gccgctatag tccgggtcgc tctgtcccac attgtcgaca aaaactaaat ccccggcgaa
     6121 cccgagatat gaatagcgaa ctatcttatt tccgtaccag cagggaacac cctgcattat
     6181 cgggttgccg ttaaccgtca aatccatata cagcccgcta tttcgttgaa tcagcctgat
     6241 gatgcattgc tgtccagcca gattaactga tatagattgt gattttagcg gctgtagcgt
     6301 cactgttctc atgtgatcgc ctcgttgata tttttcgcca gctccgccgc tttttgtgta
     6361 gcgctattag ccacctctaa aacgggtttc gatacagtat ccagtgcgct ctgaaatccg
     6421 gtttttactg cggatgtaac attattcgtg atgtcgctca ctgaggattt tagcgatgcc
     6481 catgatttcc ccagctcatc aactgtcgat ggggttgaac ctgcgtcttt ggtggtagaa
     6541 ccaacgccgg ttccactctg gctcttggga tcgtcagtcg gcttactgcc cgattgcgcg
     6601 ccagagataa cgacctccat ttgctgcatt acctcctgaa aataaaggta aattgtcagc
     6661 attgtcactc ctcgctgaga gttaacttcg tacgaatgat caataaggtc gtagctctcc
     6721 agtgtctctt tcggcgtctc gatgttgtat gtgcttgccg tttctaacat cgttttgata
     6781 gtgctcaaaa cgtctctttg gctgataaac gtcaggtcaa aaatgttcgg aatgctgcct
     6841 gaataaccgg tcaagcccgt gacaatgatt tcgcagcgca caaccccagg ctctttgact
     6901 ttgttgattg actggtattt gccgccttct actgtggcag tcgtaatctg agctctgcca
     6961 cttggctgaa tggaagccat cccgctgaat tcaagggcaa ctgaatcatc ggagctgctt
     7021 cgaatgacgt attgagggtg gagaacgctg tcgatgatgg aaagcggaga gccaccgccg
     7081 atggcgttaa aaatgtcagc cgtattaaga cttaatatgc tcatttagta ctccggcaat
     7141 aaaacccgcc ggagcgggcc tgttgactgt ttatcaatat ctgctacatt ctgtgtcacg
     7201 aggcgtcgaa acctcagcag aagcggccag aatcaacccc gtcagtgttg gtttttttat
     7261 tgcctgtcat tcagtgggcg cagtgcgcga ccacaccccg aacagagtcg ggagggcgac
     7321 taatacaaca cccgaaaggg gaataagtcc gcggtctctt ttgcgccgtt tcgaacctcc
     7381 cggcaccact ccgatagtgg taattcgaaa aaagcaaaag aggtcatcat gactacattc
     7441 acagtagaaa accttccagc catcagccac aactctgtgc cggttatcac cactgaactg
     7501 ctgtcgcagc tttacggcac taactccgtg cgcattcgca ataattttca acggaaccgg
     7561 gatcgattcg tcgaaggaaa gcacttcttt atgctaactg gttcagaatt aagcgaaata
     7621 aagcacagag tatctttaag agactctgtg aaaatccctg cgaatattcg tgctttaacg
     7681 ctctggacag aacgcggcgc agcacgtcac gcaaagatgc tggaaacgga tcgggcgtgg
     7741 gacgtgttcg agaaattaga agactgctac tttaaccagc gagaactccg cccggagaaa
     7801 accacaacac tggagcgcac accattgcgt gacgccgtta acctgttggt cgggaaaacc
     7861 gggatgatct attcagatgc ctattcactg atccatcagc gttttaatgt tgagcgcatc
     7921 gaagacctga cccaagcgca aatgctccaa gcaattgagt acatccactg cctgataata
     7981 gacaatcgcc cggtatcctc tccgctgttt agcggccgcg tgcttctgac tttcaaagaa
     8041 ggccggatgg aaatggctca gactgctcgc gacgacgagc aattaatcag cgcaacaacg
     8101 atggttgagc tactccagaa gcgcggcttt gtcatcatga caaaagatga actgacaacg
     8161 cggatcgctg gtattttggg ttgacgcggt ggcgcaggga cgcgccacga catcgcagcc
     8221 atcttgtcac aaggtcaacc catcaaatag cggcggacaa ctcagggcgc gcacccgttc
     8281 ttcttccgca cgtaagagcg gtatctctct ttttcggtca ctcatgaggc ggctgccaat
     8341 agttcctttc agtttggatc gcgtctcttt gatcgccagt tggtgcatgg cctcttcacc
     8401 catcatatgg cggcgctgga gttggtcagc catccagttg aaggcggtga tatagctttc
     8461 cttgatggca gtagcggcct tgccggtgaa acccatgacc agcatcatcc acccgtcttt
     8521 ggtgatattg tacattaggc gcatctctcc ctttttgtct aaatattcga ccgcctcaaa
     8581 attgagtcgg ttaaaatcat tagaacaatc aatagataag cgctttactg cgcgaatgac
     8641 gttatcgtga cgttttccga aatacgccgc gacccttaac gaggtggtga caattcgacc
     8701 gtctgccacc atgaccattt cacggaaatc aaaggcggga attacagcgt gattattcat
     8761 agcgtttgcc tatagaaagc agagcctgtc acacagagca gccgcctccc agaaggtcgc
     8821 caccaacggc aactctcagg ctcggctttc tgtaggctct gggattataa cgtgcgcgtg
     8881 tgaagcgcgg ggataaaaaa gccccggcgg atgccgaggc ttggttgttg gttcggtttg
     8941 ggcaataaaa aaccgcctcg gcgggttatt tgttaatttt tgtgggccag aaatgtatga
     9001 tgtgaactat agccgaggaa attactaccc atatggctat taccataacc ccatatccac
     9061 catcaatatt catcatgatg tcaatgggtt tggcaaaaaa tgttagtgta aatgcatata
     9121 tgaaaaaata tagcaatgac tgacgcatat catgctcccc atgtgcgcta ttactaccaa
     9181 tgatacgcta tttttatgct gatttcattt cactgagctt gagaaagttg aatttgttga
     9241 cgaacgcttt gactgcgctt caatgctttt tgtcagtgca tcaacagtct gcggattgct
     9301 attcacgttt accgtgttga tatgggtgct gttagtaatt tgtggattgc cgccgcttga
     9361 tgatagttga tatggcctgc tatccgctaa tcggccctgc gtaccataat aattccgagc
     9421 gtcccccatg aatccgtgga ctttgcctgt atatgctctc gtttcctctg gcagctcagc
     9481 gggattactg ccgttggcaa tccatttgtc aacgttaccc attccccagt tataagcacg
     9541 caaggcattg tcaatattgc catcgtattt atttaacaac tgtgacatgt atattgatgc
     9601 ggcagccctc gatttggctg gatccaggcg ttcatcaact tgcgaatcta cacgcaatcc
     9661 gacatctctc gcggtgccgg gcataaactg aaatgctccg gcagccccgg atttcacgtt
     9721 gtaggccagt ggatttccgc cagactctgt catcatcacg ccatttagta tgtcattcat
     9781 acgttctggt gaaatgcgat gacttgattt tgatgactgt ccgtattgtt ccggttcgct
     9841 aataccaaaa aatgatttaa ttccatccca tgtgataaat ggatttttcc catccctgga
     9901 tttcatttca tcaacaaggt attggccgac ccccttaccc tcctttctgg cctgctcttg
     9961 cgcattatcg attgcattgt atgcggtcgt ggctgcgatt gccgcacgaa ctaatgggtt
    10021 tgcagcaagt ccagcggcaa ggaggagaag aagagcatta gccccaccca cggcctctgt
    10081 gaacgatttt attttgtcgc ctgcttcacg gaaaaaccca ataatgtcac cctggtgatc
    10141 gcgcagccaa tcgctgaacg atttcatcgc tgccagtact tctggcgtaa acgtcatcac
    10201 gatgttctga cgaacccggt caatctcagc gtctaaggag gctagcgtgg caaccagatt
    10261 ttcctgttct ttgacctgct gtgcggtgat ttgcgatttt ttcgtttcag aatcgaccag
    10321 tgatttcagc tcgcccgatt tgatttttgc cgcatcggtc ggatcgaaac cggcagcagc
    10381 catcacttgc atcaggttct cttgcgagtg agattttccg taccgtgtga attccgccag
    10441 cgctttattc gggtctccga gattgttgat gttcagaccg gttctagctc cgagcaccat
    10501 caggttctgg gccgcgccag ttaatccacc aaaaatggtc gggtctttga tgttcgccag
    10561 tgccatacga gcgctaccag ccgcaccgat gaaggcgtca ccgttaagac ctgcctgttg
    10621 aaagcctcga cgaagtccaa acattttatt cacgtcggtg ccgaagaatt tagcctgagt
    10681 gctggcgcgg acaatttcgt ttgatgtgga agtgaaaagc tgcttgatgc cgtatagacc
    10741 ggctccaata cccaggaatc cagccgcggc agcggtaaca ccacggaatg atgaaaccgc
    10801 cgcatttccg aactgtgcaa agtcatttga acttgacttt agggttcggt ttatgttttt
    10861 gcttgttcgg tcaaattcct tttccagatc ggatacttca tctttaacct tctttttgcc
    10921 attcaggaac tcatcggcct tgattgtgac cttataggcc aactcattga taatcatcgt
    10981 tgctcctgat gcttatgcca gacgcgttgg ttgaagtttt caacggatat gatttccagc
    11041 aggttgtaca tatctgctac ggaaagcttc tcctgaaggt caagataaga ggcctttcct
    11101 gagcagataa tggcgttgat ggttgatgag atattgacag gtgcgactaa cttagccggt
    11161 agagcatctt catcaaggaa gggatacttt actctccggc gatcgttaaa aaatcgaaat
    11221 taaccttaaa caccttgtct aacagagatc gaatagtcga cacctcttca aaatccagtt
    11281 cgcctttaac tttgcgctgc tgcagggtgc cttcatgggt gatgacaata tcaaccgtgg
    11341 acatcaggcg gtctcgcaat tgacgcgcaa catcaggaga cgatgcagag ataacgctca
    11401 ggccgacagt cgccagccca gcacaaccca tggcgattac atcagctggg attttgctgt
    11461 agttcgaatc gcccatagcg cggaagatat cctgagccag ggagtcggca tcccatgccg
    11521 acatctcagt gatgagaaat tctttaccct tgtcgcgccc ttctgtttca acgatgaaag
    11581 gaatttcctt acgagccatc agattgcact ccgggtaacg gtttcaaaat ggaatacagc
    11641 agggcgcggc tggagaactc gacggccggg aggggttgga gtccaggtgt agagcacgcc
    11701 gttcacgaag ttccacttcg cccctaatgc tggaaccgtc agagtggcgt tacaggcaaa
    11761 cgcagagatt gccgttcgct cagcagcaat ccagtcgtcc agcaaactac tggcatttga
    11821 tgtggccatc aggttaacgg tgaactctgt cgggttgaag atgaaaccag catgatattt
    11881 accgtctgct gacatcatgt cttctttgtt ctgaagtgca ccagtttcaa acatgttgtc
    11941 ggctgcgtaa tcgtctacat caaaaccgcc agggtagtaa gatggcacga cgatgcgaag
    12001 cttggaatta gcacttgtaa tgtcgatcgg cattttgtcg tccttacagg atagcggttg
    12061 aagacatggt gatagactgg attaactggc cgtctacata gtagaaaatc acgcctttca
    12121 gatcacgctc aatgcgagct gagccagtct gcgttgggat atacagatac catccctctg
    12181 agtacagcgt ggcggagatg tcctttccta ccgtgttatt cacgattcgt gtttgagagc
    12241 tatccagcgt cacgccggtg cgaatagcac cgtaattttt cgctgcttgt gcaacatcaa
    12301 ttaccgctgc ctgcacagat gcatagccag catcgttaaa cggatatgac tgatcgttat
    12361 cgacaaacag acttttgaat gcgctgacaa gattggcgtt tagccatacc tgattgatga
    12421 agctatccag ccatagatac tgtccagaaa tagcaccatc tgacgcatat tgagccatgg
    12481 ttttattcag actatatgac ccgtagaagt tgtagccatt cgacttgagc gcgagcgcgg
    12541 tagccttgtc agaaacattc ggtgacaggc cagagaaccc acggaacttg aagctaacgc
    12601 ggccatttgt acgcgagaag ttcagagaag caccataggc aagtggcatt actgcataca
    12661 gatacgatcc gtaaacagga aacacacttt cataaccatt tgccacaacc acctgctgat
    12721 agaaacagct tgagttattg gctacggttg gggccgctga agtgtcatgc acaacatagg
    12781 cgaatcgatt gttctgaccg ctaacccaag cacataattc tgttttcttg gcgtcatcca
    12841 attcaacaac ggacatgaaa ccaacccagt cctgattggt gttgatgata ctgtccatca
    12901 tgtcggccat gctgacagta tcagacccgg gagaaaccgt agcggcagta tcggccgtta
    12961 gtttaagtgc tgtcgccagc acaccatttg cagcatacga aacctgacta ttgtcaccag
    13021 tagtcagcga tcggatgatg aaacggttgg caatagagtt ccattcaacg gccacttttg
    13081 ttgatccgat gccggtttcc agtttgtcag caatatcgga gaagctggtc gcagtggaaa
    13141 gatcgatgct ggagcttgtt acggctgttc cgtcaacggt cagcgtaatt gttccggcgg
    13201 caatcgcctg tagcgatgcc agtgttacgc ctttgaggct tgcagaaagg agatagcccg
    13261 ctaccgcaga agtaaccagt cgagacacca gtaactgtcc tgggataaca gatgcgttat
    13321 tgtagccacc aaaatacagg cttccggcaa ggtactcttt cgatgtgctg ccaagcaggg
    13381 ctgaaatttc agaagcctga taaaaaaccg agactttacc taccgggata agttcgctat
    13441 cagtcaggat caggccgtta atatctaccg ccgaacccgc aggagaaacg acattaggcg
    13501 tgatcttaaa atcaacgctc agtggaattg tgctcattta tctacctgtt caattgttga
    13561 ttcgaccttg tcgaaatagt cctgagggaa cgacacggtg atgtgtgcct gcagagaaag
    13621 agttagcatg taacgctcct gccactggct ttccgcatca atcatgggag cctgaattgc
    13681 cggagatgag taaaggggtg ccagcctggc gtcgatggct ttgatggtgt cgtagccata
    13741 gccgctggca aatgtggttt ctaaggcgat tgcccgatct cctgcacctt gaccatagat
    13801 atcaacctgg atatctgcct ggcgaacttc cgtataaccc atagcgcttg tcgacggaga
    13861 gcctgtgtcc tgcttgatat ctctcgttgt ggatagccgc gtgaatcgca agggggtcag
    13921 gatgcagaac tggcctttcg gcatcggcac cctgttagcc tgtgcctgct ggcaaatacc
    13981 ggctatgggt tcgatgtaat tcgccagaac gtcgattacg ttgtctacgg tgaagtcatt
    14041 catgggctca cctgcaatac cacaatgagg cggcaccagt caggccaaag ctctaacggt
    14101 tcaacaacaa gccattgctc gctaccaata acgaagatat ctccgccctg ctccatctcg
    14161 cgctgaacgc tgaaatagtt cccgttcaca taaatcacct tcgccagccc ttgaatattc
    14221 agaccgtcga cgtgctgcat gtcgccgcga ctgatgggtt gaagctgaat ggtgacattc
    14281 tggtcaggct gataagttgg agttggcttg cgacctgggc cgatggtttc gcctgcgtat
    14341 ttcttgagga ctgcctggat gtttgggttt acccttcgaa tggcgttatt ggctatcttg
    14401 tgaaggttca atttctccta cctcataatg cacatcacga atcatgactt tggtgtcaac
    14461 gagaggcttc gttgatgtgt tgccacgata tttccttgcc ttaactgttg aaggcttcaa
    14521 aggaggatcc attaaagttg atattgattg aacaacatcg ccaacaatta cttctccaac
    14581 cgcagagagg acattttcta tgggaatgcc gttggatatg cctctggata tagcatcagc
    14641 ccattcctgt tcgtgatgag ctattgcgtt cctaaaaaat ggtctgggtt cctgattgtt
    14701 tgctgggttt ccatattcat caattgctgc aaccattgct accggagtgc catctggata
    14761 ggttgcccta tcaataaatc cagcctttaa ttgaaggttt gctagcccat taccaatgtt
    14821 attcagcgca tcgagtatct tgtcgctcat ctgctctacc ccctgtaaaa gcccattcga
    14881 taaatctttg tggcctgcca gaaggtgaat ccatatggcg actgaagaaa gaactcagca
    14941 ttgaatggaa cattgctcat tgccgaccct acacttacgc taccttcgga tgcagaagaa
    15001 aggcggccaa ccattccggt cacgccgcca ttgccattcg catcaacgta gaataagtaa
    15061 gcaaggtgcg ccgtaagcag atacagcagg tattttcgct ttgcttcatc agaaacaacg
    15121 ctgagcgtcg tgttttccag gtacatctgc gcggcaaaaa acaggtcttc aacctgtgga
    15181 tctgtcagtg cactgtactg agggtttttt gatttccact cagtcggatc cagaaccacg
    15241 acgcccatag ttatttatcc ttttcagatt ctttcagcac agcctgctca gcgccggttt
    15301 gcaactcagc tttttctttg ctggctgcgt tagcgctgct ctcgttcttc tcggcgtaga
    15361 tgaagccttt ctggatcgcc gtcatgcttc cgtacttctt cttgatggct tcccaggctt
    15421 cttccggcat cgaagtgagg ccacatacac cggtgtagcc atttacggcc accagcgcat
    15481 tgctgttctg gccgttaacc acgatttctt cactgccgat ttcaaacacg acaccgtgca
    15541 tcagcttgct accaacaact acgttaccca tcagagagtc cccgtcattt gaacgacgcc
    15601 gctcgggcga taaattacgg cacccagcgt accggctgcg actttctggc tggtcatgga
    15661 gtgctcaacc agcactggga aggcgcgcat tttttcggtg taaaccgtgt tgccagtcgg
    15721 ctcgccacct acgttgtcag cgataagctg gatcaggccg ccggacggcg taccgaattc
    15781 aggtaccacg acaacagtca ggttcggata tgtctttttc accaggtcga tagcggatgc
    15841 ggtacccagg gcgttgattg cgccgagaga ggcgttatcg ctcgggctca cgcccagttt
    15901 catcggcgtg gtttcctgca ccagaccctg gtttttagcg gccagagagg tgaacatttt
    15961 ttttacgtcg ttgaagatgg ccacggcgtc cttgtcggcc catttgattt ttccgtctgc
    16021 cgtagtgatc ggcgtcagcg cggacggtaa tgccgggtcg ttcatgatgc cgaagtttgg
    16081 tgcgccggaa atgccgtaca tgtacgactt gttgaagaaa cggttaatcg ccgcaacgcc
    16141 agccgcctgc ttcatggcaa cataagggat cattgccatg ccgtattttt cctgctccag
    16201 gtcgccccac tcgttcatac cctggaagcg catctggcga cgctgttccc agttggtatt
    16261 aacgtgagta gagccagcgc gggaacgatc gtcataagca acgatttcat acgcttcttc
    16321 ggtgcgcggg aacagaacat cctgcaccgc ccagttgccc tttttgactt ccgggtaaag
    16381 ctgggttgcc acggtcggtg cgaaaagctg tttgatgatc atcgggtcga tgatctgtgc
    16441 cgccgctgcc gggattccgc cgtttgcgac ggtcgccata tcaacagcgg agtcaccgac
    16501 aataccgttg cgcaccagat aagaaggggt tttctcgaag ataacaccct tatcggtcag
    16561 cactttgagg tactgcggga gagttgactg attaagctcc attacagaac cccctgcttc
    16621 gtcattttaa tgattgagcc agcatccgct gcggaagcta cccagtaaga cgtttcgacg
    16681 gcgccggaaa tcgttgctcc ggcagcgccg gttttggtcg tgccgtctgc cagcaccgca
    16741 aagattttct ggcccacggt cgccgctgtc gcagtgcgca cccagaaatc acccacggta
    16801 aacacgccca gatcggtacc aggttccacc agcattgacc ccgttgaacc cagcgggatg
    16861 acgcccttgc cggtgttcat cacccagccc agcggctggc cggtgcccgt gttgttcacc
    16921 agagtcggat cggtgccgtc cacccacacc cagcgggcca gatagacacc gttcgcgcca
    16981 gctttatagg agccttccgg cggcagcgcc acggcagtag ggttaagtga tgccaaatca
    17041 ccttctttcc ccggtgatgg ataaagcgtt acggattgct gaaaagtcat ttttcgtgtc
    17101 cttagaaata ttctttgaaa tcggcttcgg tggcagtacc cacggcagag tcaccgacag
    17161 gtgatcgggc cgtcttgcgg ctgatagcca tctgcactaa cggcttgaga gcggaaggat
    17221 ggatgccagt cagatcaact ttttcctgtt tcaggacggc ctgatagata tcatcagccg
    17281 agtcaccagt gacgtggccg taaaccggtt caacgatgcg catggcttca cgggttgccg
    17341 cagcttcacg acgcgccgcc gcggtagcat cagccgtcgc ttttgcaatc aggtcacgga
    17401 ttgcgctgtc acccatgggc tttttgtcct tatccttttc gtcttcttcg tcgccggatt
    17461 ttttgtcatc cttgtctttt tctttgtcgt actcatcccc ggacgcgccg ccttttttct
    17521 cgtccttatc ggactcatcg ccggactttt tgccgtcgat ttctttttgt tcatgctgag
    17581 ccataagctc catgatgcct tttgccagtt cgtcggcatc agaatcggat gccccggcaa
    17641 atttggtttt aatcagatcg gtcaagccgt ccatcaaagt ttcctctctg tcttgtgaat
    17701 cgccgatggc acattcgatg ccgacccggc ctttaatggt caatgcgaca gaattaccag
    17761 taatgtttct ggctacgccg tcatatgcct gacccatgaa ttcgcctggc gtcatgtcca
    17821 gttcgaagaa tgaagggaat atcgagagct cacggcgcgt ggccgtttca acgccgtgta
    17881 tggcgtcctt gtcccacaac ttcatgctgg taacgagata tggcgcttca aagcgagtgt
    17941 cgctgccagt ggccccgacg cgctgttgcg gggtatccgg tgtatcaagc tgcgtgggat
    18001 gctcaatggt cactggcacg ttgttaaacg agtcagcggc gcggataagt tcttccgccg
    18061 ggcgatagat gtaataggtg cgatccgggt taagccccag cgcctgccag ccgggaagac
    18121 tggacccgcg atattcactc acgcactctt tgctgatatt gcatttcgcg atgtccatgc
    18181 ggccgtaatc atcaaagctg cgcacggatg aagacatgtc gtaggagtcg ccgccgtagc
    18241 cgttggcata agccgctttc tctacctctt cggctttctc tctggtatcg aatggccctt
    18301 tcgaacccca ataccatttg ccgtcttttt gctgtactgg catggaatta cctttctcag
    18361 ggcaataaaa aaggccgtct aagcgacctg tttgttaagt attttcttta gcattgaatt
    18421 aatattcatc tgataaagtc ttaccatttc cttcccatgc tcatcatcac taagaccttc
    18481 ttcaaccaaa tactcactaa aacttgcaag cgccactctc agcgttgcaa tctcgcagtc
    18541 ttctagctca atgatcatga tagcctttat ccttgcatca gaatggcaat accggtttcc
    18601 aggaacaccc acaatggatt tcttccccag gcaaaacgta ttcgccgtta tcgccaactg
    18661 gcaacccttc atccaggtca aattcctgac cgtgcgcctt gacatgtagc gggcgaggat
    18721 ggctgccgcc gccggagtgt atccagatgc cccgggtgat cccgagcgac ttctgacgca
    18781 ccctggcgag ttgtgcgcat gccttgttgt tctggtccag cgcgatgttt tccgcgcgcc
    18841 gccgtgttat cccgtattgc ttctgtaatt cctcggtcat gtactgcagg tcacgaccgc
    18901 gccggatgga ttccatcgtg atggtttcca cctgcgtaaa gtaccgctcc gggatggatt
    18961 taatcaggct gacgttttcc gcgacgattt cgttgatcgc ctcttccatc tgaggcgtca
    19021 tcgtgaactt aacgcggggg atttcggcag cagtcagcga accttttaat gcccgggtgc
    19081 tgaaattatc cgccgcctgc gcgaacgccg gagcaatgcg cacggcggac tcggaaaact
    19141 ccagcaccca tttttcacgg atttcctgaa tgcgctcagc gacatcaagt gcgccgcgat
    19201 tacgctgcat gctggcgtta tactgcgccg tcgcccagta attggtgcta tccaccattc
    19261 gcgtaatcag cgatttcagc gatgacgcgt actgcccggc cagttcattg ctgtaccgaa
    19321 cccggcgtag tgtctttatc ttcatcatcg aatcccggta tcaggactgg cttaacgtac
    19381 ggcacgccgt tgaagcccga atcttcgtcg gacgccagca ccttgtgagc ctgctcaggc
    19441 gtgatcacct catctgcgat caggatggaa taggtttccg ccttggtctt attaatatcg
    19501 gcaatttctt tatcgctcat ctcatccagc gggttgaagt cgatatagag gtcttcgtac
    19561 cactcgccga actcattgaa gcagacaagt ttcagtatcc agtcgagaag cggcttgtag
    19621 ccgttcttct gtttgttggc tacgttctcg tgctgcgcgt cacgctcacc ttcaccgctg
    19681 gcgttcatgc cgctgggctg gctgcctgtc atgctggtca cactcaggcg ggacggcatg
    19741 cacaacagtt tttgctgctg caccagcagg tcattcaggc ccgttaatgc ggtgttcatc
    19801 tgctcaagtt cttcgagcgt ctgatcaatg gcaagaacgc cgtgattgtt tttcccgtac
    19861 accagcgtat ccagtcgccg gttaaactcg ctgcggtcct gtagatacgt cgccatgtcc
    19921 gttttccaca cataagtgcg gaacgacata atgatgcgcg ggatatcatc acggacgctt
    19981 tcccagttgg tgacataggg cagcatcatc tggatcagcg acaggccgcc gaagttgtag
    20041 gacggcttga gcatgtccgg cacggaatac agcacaagct gtttcatgcg cgaagcgtga
    20101 accatgcgcc ccatcacata ccacatctgc ggtacgaaga agtcggggct gatcgggtcg
    20161 attgcgttat acgcctgcgg gtaggtccac attggctcta cgacgcgaaa cccttcgata
    20221 tcccctttct tgatttttgt cgggtcgatc atcaactctt tgtcgcgctc gttttcatcg
    20281 cctttcaact taacgaacag atgcgagttg ccgaacgcct cggcgttaaa ccctaccttt
    20341 ttgaggtgct tctcaatgcc gaacgcctcg aatgcatcct caatctggtt aatgatgttg
    20401 tcgcgattgg ctttggtgtc gttggacttc accttgaagc ctttgcggaa aatctcatta
    20461 accgactgct cgcacgcaat gcggttctcc gatttctgcg ccagattggc gagcaccgga
    20521 tagcccataa acactgaatc aggctgcgta aacgtgttat tcaggtacga ataatcaaca
    20581 ctgtcacctg tgactacgcc ctccggaatc acgcctttgg gcgcactgta gggctggtgt
    20641 ttcatcgccg cgaaatgctt gtcgatttgg tctttctggt actgctcgtc agttacccac
    20701 gactgcccga ccttaagtga ttgtttctca accaccggcg caggaacggg cgctgctgtt
    20761 tcaggtctca gcaggttgaa taatttttta aacatttgtt caccagcctg agtctttacc
    20821 aacgagcaat tgcggtctgc ctttcatctc tgaaatggcg tccatcattg gatccaattg
    20881 gtcatcgtga gtgttgaatt ccgggtttat cgcttccatc tcaacgagga aatcattgat
    20941 aaagtcagcg ttcgcgggga tttttatata ccctgactcg atatagccct gggtatccat
    21001 gaggcgcgtg tacttgtcct tattcctctg tatggctttt acagggcata acgcatcttt
    21061 ccggatgctc tgaattagcc cggtgccgga tgccttgtct tcaatggcaa ggtgacgcag
    21121 cggtccattc ttaagcgttt tgcatttggc ccagaacgcg acggcgcggc gcttgagttc
    21181 gtcagattcc catttgcccc ggatcatgtc tatcaggtat aaatagccgt cgtcgcccaa
    21241 accccagtgc tcaaacacag agaagtcatt aacctctttg gttttctgcg cggtatcgcc
    21301 gtaaacggcc cgccacttga gttttggtag ctcccggtat tcgccaaacc attcggactt
    21361 gatcaggccg ccacctttcg cggttggcct ctgctgatac agagcattcc acaccagcga
    21421 tccgcgctgc tttgctttat cgacaaagct ttgcggcata cgctctggga acaggatttc
    21481 tccgggctgg cgcaggaagt atttcttccc gttcagctcg tgaatttctt ctttctcagc
    21541 ctccatagga aagctgacaa cacgccactg ctcgccgccc tcttccgctt ttttcagcaa
    21601 ctgaccagcc agatcgctct gatgccagcg ggtcagaatg atgatgatgc cgttaagttt
    21661 tggatcggcg cgggtgaaaa atgtcgtgtc gtaccagtca ataactgctt cttggtaagt
    21721 gggcgatgac gctgttttgt aatctttcgc ggggtcatca ataataccga tgttcatccc
    21781 ctgcccggtg ataccgccat taacgccagc agcacgataa gaaccgccgt gaatatcacc
    21841 ttttgcatta accacttccc acaactcagc agtgcgtata gcgccaccgg cgccagttcg
    21901 gcttgatggg agaagcgtgt caggaaaaat ttcggcgtat ttctttgagc ctacgatgcg
    21961 ctgcgcatct cgtgacatgc ggttagcaag gtcagaggag tacgagcacg caatgacgtt
    22021 ccagtcaggg tgattaccca gtatctttgc cggaaatcgc cttgatgcca gctcgctctt
    22081 tcctgagcgc ggcggcgcaa atatcatcaa ccggggcata ttcccggcct ctacctcttt
    22141 ctggaaatta tccagttcag cgcacagcag ttcgttaaac cagcccgtct cgtacagggg
    22201 gttagtgtag agggtgaagt ccagcaggtt ttcctgcgcg tcctgaatcg cccgtttgcg
    22261 gtacgcctca agaattttcg agtttttcct caagctggtt tttgcgacgg ccataaccca
    22321 gctcctgtaa tgcctctttt aattgctcat cagtcatatc ttcatgctga attggggaac
    22381 catttggccc gctgagttcg tttttcttgg gagcttccca tccctgcatc tctgccagtt
    22441 gcttaatagc cactttggga tcgtgcattt taatttttaa tccctgtggg cctgcagtta
    22501 gttcagatat tgcggcaaga gcttccgggg acagaagggc ggagtcttta aaactccacg
    22561 atgcctggat gactggctgg ccatcttcac cttcaccaat cacaccattt ctgaattcag
    22621 caatatcgta gagggacata cgaccaagcg atgtaaggcg cttaagcgct tcttcccggc
    22681 ccataatggc ttcatcgacg atttcccctt gtactgattt tataaaagcc tgcacgtcta
    22741 tatttgtcgc taactgatgc gctgcttttc ggagattatc gccctttgct ttcccgcctg
    22801 ctttacgata ggcgtcagtc tggttcttgc ctttaatgat ggcgagagag aatttttttt
    22861 gaagcggagt cagcgcatcg aaaagttgct gctgctctgc ggtgagcttt ttcgatgcca
    22921 tacagaacat tccactggtt tgaattttat aagtccggca aatattgaga ctgccagtga
    22981 tgaaaacata cacaaaactc tgtcaaggcc actacaaagc gacctttgca gaattttata
    23041 aaatcagctt gatgccatca gaccggcatt aatcaactta gtcagcagag cattgaaatc
    23101 tgcctgagtc ggcgcggcgg tcagttgggc cgtaaatggc atttgcttga cgatgccagc
    23161 ggcggtagtg gttgccgggg cagttgattc agtagaagtc tgaacggttg caggcgatcc
    23221 ggattgagtt acgacgataa ctggcatgat ttcaccttat gcgttaacga tgaccgttac
    23281 agcagcgttg agcggcttaa cgtaaacagg ggtgccagag acagcacgga aaaggttttg
    23341 agtcggtgat ccgccaataa gcggaaggcc tatcagattg gtcgccggtg ctgtagtgga
    23401 ctggcacacc tggcagtttt cattacctgt caccgcgatg acggatgccg cagtgccgtc
    23461 atagacctga gtccatacgc cagcggcagc cgatacgttg agtagttgca tgggcgctcc
    23521 ttatttttta acaggaagca ccagaatttt ttgactgatg ccgtgtttaa cgatgaatgc
    23581 agttaccttt tcgtaatccg gctcgcattg aaacatcatg caaaacagct tcaacgtctt
    23641 tatgtagacc ggcagccacc atcggctttt tacctcaact gataaactga ttattggcat
    23701 aactaactcc acgcttattg aggcattatc aaagcccctc agcgaagagc ttttgtaatg
    23761 cgcgacgttc tcgctgtctc acgaaagtga ttggccgctt ccgtctgttc cggctgtcaa
    23821 gatgcgatca ccatccttat ggtgttacaa atatttttcg gccagcgcca ccaactcttc
    23881 ttctgcttcg acgcccagca cagcaagccc ggactcgatg aactgcactt ttgccgcgaa
    23941 agaggctttc agcgcatcaa gtgcggaagg ttgtttgtcc tgtgccggtt gagactgcgc
    24001 ctgtggttca actggtacag caggctgtga gtcaccaaca ggtacatata cgatttggtc
    24061 ggtcatggtt ttcgtctcgt ttttggttaa gagccaggta atggcccggc ggataatgtt
    24121 catttggcct gatccccgca cagcctgtcc cacgtgtcgt tatgcgtgtt aatggcgcgg
    24181 acagtgcgca cgtccattac atcggcgtca ttgccgtggg tacggattgg ctggaaagcc
    24241 gtgcaggaag aatcgacggt gacgtactta atcgtcggag ttgtactttg aggtacgcat
    24301 cctgttgcga gcagcagcat cactgacaga agcatttgcc gttttaacat cggtagccac
    24361 cttgctgatt tcagcctggg tttttacgac ctgttgagcc tgccgggttt cttcttttgc
    24421 cgtcgccacg tcgtcagccg ctttcgtctg caccgatccc gttttgcgac cagaaaaata
    24481 agcaataaca actgcagcga tgccgcccag agtaacaagc agaaagcttt tggccccgaa
    24541 gaacaatgaa agtaattcgg tcattgcggt ttctccggag gggtcagttt gttctgcctg
    24601 acatactgag agagaaccga cgcgccaatc agtgcataac tgatgatttg caggacattg
    24661 gctggcagca cagatttaat atccggtggc agcatggccc atgcgtgcat tgcggaatca
    24721 gggaacgcca ccagccagcc gccgatagtg aatgcgatcg cattgatacg taccgaccac
    24781 gttttgtgca gtagcgcagc atggctgaca aactcaaccg gcgtgaattt gcggataagc
    24841 agcagcgcga tgactgccag ggcaaaaccg ccaaaccaga taatcagcgt cataggagcc
    24901 ccgcatatgc attcatgttt ccgctacaca tcacatcaga gtgacgtttg gcgcgcgctg
    24961 gagtctgttt agcccacagg ctattcagca tgccatctgc ggcgccagcg aaattccctg
    25021 cggcaatcat cgccagtgtg tttttgaatc ccaccaggcc gccggaaccc atctgatatg
    25081 ccatgctgat tagaacgtcc cggcgcgctt cgttgcacag tttaagtgca gcaacaatcg
    25141 tcgggtaagt attcattttc gcgatggtgt cgttgaccag gcattgcagc catacatcat
    25201 tcacttcctg cggaatggtg aacgtgtaat tcgatagcgg agcacccttg gggccgattt
    25261 tgaagccggt gccaactgtc gggaaccctt cggtatcgat gtaaggcttc ggcttataag
    25321 cctcttcaaa tctcaggatg gggattatct ggctcataat gactcacaag ggttgattta
    25381 catcggcgaa agatttggca ggaatgtttt tctgcctggt accgtcaggg ctgataacaa
    25441 tcacgtttaa accagctgtt gagggattgc ccttttcggc attcaatgcg cgcatttctg
    25501 ccgccgttcg ctgtcggttc agatctgcta tcagctttaa cgactcgctg tttgtcttgg
    25561 tcaggctgtc ggcctttcca agtgcgaatg tgattagtgc aaggaaaatc agcgggacat
    25621 aatcaaaact aaaatgatgt ccgcgccact gaaatttaat tggtttcatc gttaccatcc
    25681 ttaccagagc caagccccgg cggattgatt ctcctgatga tcgatgcgcc ttgccatcca
    25741 ccgaggccgc agcccaggat gataaacgcc tgtgaccatc cgttagcgag tccaaaaaaa
    25801 aacatcatca ttccggcgaa taggctcacg aaaacatgat cacgtaatga tcgcttttgt
    25861 tcacccggcc ggtttgcgta tgcatattta gccaacgaac cgagcagagt catgacaagc
    25921 gcgagcagca aagccgaaac taaatcagtt tcgtttgcca tgcgtaaccc accctgtttg
    25981 ttcggtggtt ataaaaaaga gacaggccct cggactgcaa ttaataacga gacgatgagg
    26041 gttgattgtc cggggcctga taataaaagc cccggcgatt gccgaggctg tgaattcgtt
    26101 tttcgattgt tcagaaacgc aaaaacccgc tcagtggcgg gtttcattgt gtacgcatat
    26161 acgtgttgca tcgtatttga atgtaatggc tcattggctc aaagtcaata gctttgtttt
    26221 gtacaaaata aaaccccgct tctgcggggt ggtgagcgtg ttattcttta ccgcgtcgtt
    26281 ctctatcgag cttataagca tcgataaaat cccggagcgc ctcttccggc atgggtctga
    26341 agtccgggtt aaacgcacca gatttacgtg accaagcgtg tatttttgcc ctgcttacgt
    26401 cccacccctt gctttcaaac agagactgga tgtactcctt gtctttgtga atcctcagga
    26461 caatgcagaa ctcacgaaaa acgtcgtttg tcgggatgga tggcagatca gacataaata
    26521 atcctgcctt cataaagttt tggcatgtag ctttccatcg tctttgcctt acccatgttt
    26581 ttttgtgagc gggatatttt caggctcacc acgtttaccg gcgtagcgtc agatgagaat
    26641 ccgccagcaa catcaatata tccgccatta cgttccaccg tggtgcacat gccgatcact
    26701 ttgccgtgct gtagaacggc tgccggcgta gcgccggtca ggctattttt caattcatca
    26761 gtcttgcgtg attctgattc ttttttcaga ttcacggttt ctattctgat gttcaattcg
    26821 ttgattaatt gcgctagctg agaaaaccca ccctgatagc gatccccgct ccacagctca
    26881 aacatatcgg cggaagaaac ggaaacactc agattaaggg cttcggcggc gttttttaca
    26941 tctgaaaatg atgatgtggc gttgatagtt ttcatgtgac taatatccta tgcggttatc
    27001 aatgtcgctg cctgttcggc agtagagtta atagctgatg aatatacttc taagctgcct
    27061 tttcggcagt atacggaaaa cagcagttct tatttctaag ctgcctgcgc ggcagtaata
    27121 aatagtgatt cttgtttcta agctgccttg cggcagtctt cgtatttgat actagtgctg
    27181 cagtagattg tcgtcaagtg cagcactaaa tatttatacg tttattttcc cgcgctgcgt
    27241 attcagccga tctcgctctt ctagcgcctc cgtcagccgc aaataaacca gcatttccgc
    27301 cgattcgatt agcgccagcg attctcggcg gcacgttgat atagacggca cgtctatgcg
    27361 tctgtgcgcc gattcacgga gtgacatcag gcacttaact gagtcatttt tagctgcggc
    27421 gctatcatcg ccgatcatca gagtgtcacg gtacacccgc gctaaatgcc tatcgctgct
    27481 gccgtaaaca taccggcaaa aaatcaacac ccaagcggtg cggctggttg cgtacatctc
    27541 gtcccaaatg gcactaatca gcctgccgtc atcgtcgcta cacatcgggc gtgacgggta
    27601 ttcagcgggg cgcatgcgcg ccatgaactg tgaaataata ctggtctgac ggcgatccag
    27661 ccgcccagag tacacccaag ctccgaactg ctccaaaatc ggctggagcc agtacttttg
    27721 ttcttgcgtt aatttcaatt cgtccgtcac gcgccagccc tccccagcgt tttttgataa
    27781 tttcgcagaa tccggtaatc aatgacgaca gagcctgcgt agcgataaat acgcaggcgg
    27841 caccagcgaa ggcgtaaagt gtcggttacg tggttggtat gagtcatgcg gcctcgcata
    27901 taatgatctg ccctacttca ccccagattt tcgaaacccg gccatcccag acgcggctat
    27961 cgtcatcaaa aatcgcatcc agtagggctt tctccaggtt gtctttgtcg ggtttctgct
    28021 ggtggggttt gccattcatt tccgcccgct tctttttgct ccagctgact ggcatgggta
    28081 tgacgaacgt gacgtgccag ccgctttccg ggagtgtgat tttgttcagc ctgacttcat
    28141 cgcaaaacgc ccggtaccga agtaccggtg gccgtttttg ccatttgtcg cgctgggtca
    28201 tgcgcggctt gccgattggc gtgatgtcgt aggttttcat ttcggcacca ccagccccag
    28261 tcgggcaatc tggataacgg tcaggacgat ggcgcgatcc atttgctggc gtcgctcttc
    28321 acgcgtcagg tttttcccgt tgtctatctc ggtgtggcac actgtgcaga gggcggcagt
    28381 agcgcaatcg tcggccttga tacccatgcc cttgccttcg tttcggtgtg cgacctgggt
    28441 tccccatgcg ccacacaaaa cgcaccgctg aatactgccg acggccgcca gccattcttt
    28501 actgcggtag atggttttca tgcggcagcc cctttgtcac aatcaatatt ggtgaccggt
    28561 ataccgacat attcatccag ccaaattggc ttcccgcctt ttgtaaacat ggtgtgtccg
    28621 atatcgcgct ccagcgagat gtatcgccgg tagagatacg ggtttaatgt ggctgcgttg
    28681 cgcaaatcgt tgagggaacc cattatgcaa aacatgcagc tgaggcgctc attgcctgta
    28741 ctgtatgccc agtgtggttt ttgtcctgcg ctggcgattg tttcgaaaac ctgctcagtg
    28801 gtcagatcaa aaacagggag ccagtcataa acatcgcgcc ctctgacgct ctggctcttg
    28861 ttgagactta gcgggttgcg cttcgctctt gctgctgatt cttgcgagcg caaccccatg
    28921 cagttgaccg cgattccacc accccgtctc ttgatgtcct gacggatgaa tttttgaatg
    28981 ggtccacgtt ttaaatcgct agtgcactgt cggaaactgg cgctgggcca cttcccgcgt
    29041 gatttgacca tgccgagaag gttttttccg gcctggacaa tgtttaaatc atgggttgta
    29101 ttttccttga tgtgctcaat aacaccgggc cactcaacgt cacccagact cgcgtggatg
    29161 acgactattt gattgtgcgg aatatgctca gacagcaacg catacatagc ctgactatct
    29221 tttcctccgc tgtgggaaac atagaaaatc gcaccagcgc taattagctc ctgaattttc
    29281 tggttcatca tgccgcatac tccagcagct gcgcggctgc gttttctgct gactgctggc
    29341 ttgggaatga ccggcgcagg ataaaattcc agagaacgtc gagagtggcc cggtacagat
    29401 cgttaaattc caggtcatcc atttttgcaa atgagactga ccgcgcctct ttctgaatgc
    29461 tgccgtctgg catgatgtag gcgtcgtaat gcccggcttc aacagtcacc cagcggcgga
    29521 atgcgtcaaa tgattttgta gcggagatat tggcggcgcg ctggcgaccg gtggtttcga
    29581 tatactcgtc agcgacggcg cttattgcgt cttctgcgcc agcatagctt gcgagataac
    29641 gcacgaatcc acgaacgaaa tcgcgctcgg attgagatac ggccccgcct actggctccc
    29701 agtagtcaaa accaagaccc agcaaggaaa aatattttcg gtgaaatgcg gggttgcggg
    29761 tctttttgaa ttcagcacaa atcacggcac cgatggttaa tcggtccacg taaattcgtg
    29821 tgtcagatgt ggacggaacc agtatcccgc ccggggattt tactaatgat aattgcgcca
    29881 tagtgctctc catggcgcag caggtatcag ttgttcaggc tgatgattta atattatcag
    29941 agccggttac cgtgtagcca gctttttgca gcagttgagt taacagcctt ggagtaccaa
    30001 tgatttcatc ggcctggagc ggcataaacg acaccaaatc acctcggcga tacatcagcg
    30061 cacgctcaca agttgggaac tcatcaaacg ctgcgacaat agcgcgatcg gcgcatctga
    30121 ttacaacata acccccagta ggtatttcaa cttcaaattt ttctgtatta tcagccataa
    30181 agtcattaaa actgtattta tgtacagtat ttttaaaccc attattggcc gattgcaaac
    30241 catttttttc tgtgtgatca ctcataaata ccgctctaaa acatgacgac gcgctcctag
    30301 cacccaaaaa aaacatccag tgcatttatc ataatcggat aattccgtta gttattatcc
    30361 gatattgcat taattagtta caattattta tatatttgaa tggttagtat ttgtggggat
    30421 aagaaagggg ccgaatggcc ccttggtttt atgctgtctt cacgaaaacc acccagtggg
    30481 ttttgtcatt tttgccggtg cgctgccaga taaccggttt ttcgtccgta agcgcaagca
    30541 cctggccgac cgggatttgg gtttcgctcc atttgaaaat gaataccccc ccctgacgga
    30601 gcacgcggaa tccctcagta aagccagcgc acaggtcatc ccgccaggta tcccggttca
    30661 ggcgtccgta ttttttaccc atccaggcgt tttcgccgac tcgctctaaa tgcggtgggt
    30721 cgaacacaac gacggggaat gattcatcag gaaaaggtag ggcacgaaag tccgtaatga
    30781 tatccgggct gatgaccaga ctacgaccgt cgcacagtac gtgctgttcg ttgcgaatat
    30841 cacaaaagac tgcgcgggca tcttgcttgt caaaccaaaa catttttgag ccgcagcaca
    30901 tgtcgaggat ttgaagtgta tcaggcatga tccacctcct tcaccaaccg atcacccgcc
    30961 agtgttaacc ttgtgtcgaa aaaacccagg cgtccacgca gtggatggag cggcaacgag
    31021 cgagcgcttg caagctgaaa gcctacgggg ccaaaaaacc acggtgacga gctgccttcg
    31081 catgtgccgg tgattgttgc gtaaccaata atgccgccgc gctgcaggtc atcaaaatca
    31141 gggatgtcaa cgctgattaa gcggtcaaca atcgttgcgc atgcctcgtc atactccttt
    31201 cgcgtcagtc cttttgatgc atgaatcaac acggggccgc gatattttgt gtgccaactg
    31261 cgattttcga tatccttaaa gccgttgacg atgagccacg cccacggctg gcgaatggat
    31321 agagctttca tttcttgtcc cccagctcag tccaaaattt aacctctgca tctgatgcgt
    31381 tttgagcagc cagcaccaat atttcatcgg gcgtctcttt cacgcgaatg cgctcaccgc
    31441 tggacatttg caggtgtgtc aagcccgttg gacaaaaaga ctcgatatga tcgacagata
    31501 catagattga ctcataaacg actttttctt cggggccgta ttcgccttga tgccaggcgc
    31561 ttgagcattg tgtcaatttg atgaatttca cgcttcaccc cctttgttct ggagagcgca
    31621 gcggtcaatg cgctcgattt cagcaacgat tagcgcggct gctttgacga gcgagcggcg
    31681 cggcccaggc gtgaatttca gccacttcaa atcccacggc catatttcgc tcggtgcaat
    31741 atgcttatac ggctgacctc cgtatgactg agcgatatgc aggatgtaag tggaggcagc
    31801 gaatgacatt tcaaaaccaa catgctcatc gtcatgctcc ggcgtccagc cctctgtcgt
    31861 tatctgacgc tggcgctctg ctattacgtc tcgtactgct gcgccaactt ggtcgggctg
    31921 gggagcggcg gcgagtgcaa actgaacgcc ttgtcttatt tcgtcaaagg cgacatcgcc
    31981 cttgatttcg cagtggcgga acgcaacgga taagaattca aggcactgct cgtcagtcca
    32041 attccaacca tccggaatta ccggagagtt tgcagcaata gcggcgcggg cggcagcatc
    32101 ggcctgcttg attcgctcga tgtaggcagg aagcagggtc ggcgggaatg tgtcgtccca
    32161 cggcttgacg ttgcgcttta ctgtttcctg taactgttcc acatgattga ccagtccgcg
    32221 cactaattct gtccagctat tggcatcgta gaaatcgcat agcgctgcat caggcgactc
    32281 ttcacgcgag atttctggtg atgtatcaag cgggcctttc tgcgccagca tttgaggcgc
    32341 ggcctgtttc agtagctcga cagcctcagc gatgcgggat tgcgtggttt tatcattcgt
    32401 cataactagt ttccccacgg tcaatatatt caccgaaaca ctggatttct gcgccggaca
    32461 tgaaatatcc agccgcctga gcgcggtcac tgtcacaagc aaacgtctct tgcggatagc
    32521 gctcgtagaa tttgttgaat agttttgcgg tgtctaataa tggtttgagt tgttcggaat
    32581 taccggacat ctgattatct ggcaccgctg gtgctggcgg ggttggttgc tcctccgaat
    32641 catcaggcaa ataaacagcc tcatcatcta cccacgcacc agcgtcgtgg tcataacgat
    32701 ggcggaagaa atcgctgttt ccatcccgct ctgtgagcgt aaaactgtcg tatggtccac
    32761 cgtaggtggg gacgtaacca agatccgggt gctccatcca gaggaaaaat tgatccccgg
    32821 taatcgggtc ggaatgagga caccagagct cgctatgcgt gatgactggg gaggtgtaga
    32881 gcgcgacgac ctcatacttt ttggggtcgg ctgggtgtat cgtctcattc aggctcttaa
    32941 cggcgcgctc aaccatttcc ttttcgcttg catctccaac gtagtcacta tcgatccaag
    33001 gggagccgta agggcaccga acggcataca tgaatggctc ttgctgcgcc tgacgcagcg
    33061 ccagcagttc ttccgccatc tgattggctt caggaattga agccaaacat ccatcccaat
    33121 tacaaatttc ttccagtctt tctatgctga tattcatgct gcatatcctc ggcgaacgtt
    33181 catcacacat ctgtcgaaca gattgaccag cctattaact ccaaaccgat gttgaaccac
    33241 tggcgcattg ctggccgcat agtgacgatt aggcccgatc tcgggctgat gcacagagac
    33301 aattccagca tcgactaaat gacggacggc aaaccgtaca gttgatttaa cgcggccaag
    33361 gccatctgcg atttcggatg tcgtagaacc tggatttgat ttgatatatt cagcaacgcg
    33421 ctgctgtgta atttctgctg attttttcac tggtcagaac tcctgttgat ttaatcgatc
    33481 atgcatcgtg acgacgcaat ccatgttttt cgcgtaactc agcgattttt gctaagccat
    33541 cgcgttttga tagcggttta cctcccagca ccgggatcat tacgcgcggt gctggtatct
    33601 gctcaccctg ctgaatcctg gcggccatca tcgccagctc tccagccgcc cgttgccgca
    33661 attctgcgtc agtccagttg ttggcacgca taccgccgta caacgcggta accatccagt
    33721 actgcgccgg gtgcttccag ggataatcct cggctgagtc gtaataaccg cgtcggatgc
    33781 tgtatgcgcg taccattgcg atcagaccgt caacgtcagg caatccggcc agctgctgat
    33841 agccttcacg acaccacgca acaaactgcc ccggcgacgg cagaaacggg cgctcttgct
    33901 gccgggcaat ccgcataccc gcgttgacct gctccagcgt tgtgatgccg ttctcagcga
    33961 atgccagcga ccactgacgg cgaaattcat caagatcagc ctgggttttg atattcgcga
    34021 tgctggctgg gaacatcacc cgtagctggc ggaacaaccc gttgaaaacc tgcgatgtct
    34081 gctcagtgac tcgcgctgcg gacttctgaa caggcatcga tgcggccatg cggctaaatt
    34141 gctcgcgccc catgttttgc agtgaattac caacgttttt cacgagttac ctcctatcgg
    34201 tatctgtcca gcaatcggtt caatccagtc cgcgttgtcc cagtcaagag cctgcctgcc
    34261 tgccggtgcc gcaggttttg cagtccgcgt ccgctgaacg tgacgagcca atttttgctc
    34321 ccactgcgtc tggtggtacg ccttgcctgt cggctgccag aaatctacaa actcggctag
    34381 ttcggtcggc aggtatgcgg gttccggcag aatcacgccc catgtcgcgg ctctttgtcg
    34441 aaaatccggt gacggctgcc agccgctgtg catgctgaac acgccgattg gctcctgaac
    34501 gccgtcgaga taaaccggcg ttttgggctg ttcaggtggc ccggtgtttt cctgagatgg
    34561 caaattttca tctcgcgcta caagaggggt ttgatctttt acttcttctc ttctcttctc
    34621 ttctctagtc cgctttttgt ctgcatcaga tgcggatgct ttgcggatgt tcctttttct
    34681 ttcagcttcc tgagctcgtc gttttgcacc ctgtccgtta tgctcaaaaa accttggcat
    34741 acatagactt gactcgcatt cctcaagcca tccgacagca atcattgcat gagaaaatcc
    34801 gggaaatgcg atcatgtcgt cgagcgtctt gctgttgtat ccatccagtg atccgtcaac
    34861 tgaatgcgcg tcaaaaagac accaagccgc atgtaatgca ccgaccacgc gcaacctgtc
    34921 cgcattcaat gcggacgcaa tgcggacgac tttcgggtgt gtgtgcaggt ctgagcgcat
    34981 tttgatccag tctccggcca tgagatttac tccgtccacc caccagcggt gagtatctcg
    35041 atcagttttt ttgtctgggt ttcacgggca tcggcatcgg cggcggcacg ggcggcggca
    35101 cgggcggcat aggcggcata ggcggcggca ccggcggcgg caccggcggc ggcggcatag
    35161 gcggcggcat aggcggcggc acgggcggcg gcacgggcgg cataggcggc ataggcggcg
    35221 gcataggcgg cggcataggc ggcggacaat tcttcatcag ttgcctgacc actcgcgtgt
    35281 cgccatgcta catcgagcgc attgcgactg cgttcatctg tcatcaaatg ctgcacttgc
    35341 cgggcacacc agattgcgta tttgcgccag agatttttat gttcgggccg aattcgtaac
    35401 gcccaaattg cgtcagtgat gtactcagca gtcacgacag atgcggcagc aaaccgctcg
    35461 ttatcagcga gattcaggat ctcttccggc agctcgtcgg catcgtcgat atcatcatct
    35521 tcaattaact catcacgctg ctctacagtg attttcccgc gagcgcacaa agcgcgcagt
    35581 agcccgtctt tgcacgcgcc ggcatccaga atttctttca gtgaaacggt aattgcggtc
    35641 atgttaaatc ctcgttttta ttggtcagaa ctcgattgat tgaacgtgtg cgcgttggtc
    35701 gtcgcgcagt cgcatcagtg acgatatgcc agccgataat ttcaactcga actcacgcgc
    35761 aggggcacca agcagagcag cgttaaacac gtcgctgcag gcacgcatgg cgacagacaa
    35821 cagcgccagc cggtcatttg gctgaacgag ccagagccgg aactgagacg gcatcacagc
    35881 cagaattgac ggtgttaacg cggcaatctg ctggcgggcg tactctgaat cagagtcgag
    35941 ccagcgaaac agcttttgca tttgcaggta gttatcttca ggaatatcca gaccggtacc
    36001 accctgctcc cgccagcggt taacgatttc ggcggccacg gcctcgcggc tgcgccagtt
    36061 agcagcccat gccctgacag cattacgaat gttttcgtgg ctcaggcgcg gctgatttgg
    36121 gtaaatcggc actaacgcgc cgggttgttt aaactctgtt actgcgtgtt gcatggttta
    36181 taactcctgt tgttgtggta acccgtccgt agggtttgga tagagatctg ggcgtagttc
    36241 gtgtggggtt actccggtga cgtgatagat ttgaagcacc cgagacgcag ggacgatgcc
    36301 cgcgtatttt gttttccacc gactaatcgc cattccagta acgccgactg cggcacccag
    36361 ctttcttgct gagccagcgg cctggattgc gttatcgaga gctgtcatga gttatctcct
    36421 gtgttgacga gataaataaa ccacagattt acaaaaaatg caaatccaag atttattgag
    36481 tgagtaaacc agatgcttac aatgtgctta tgagaaaaaa tgacggaata gacacccagc
    36541 tgatatccag gctgactgag ataacagaga gagggatcag taaagccgac atggcgcgaa
    36601 ttgctggtat tactcctcag gccgtgaatg ggtggttcaa aaagggcgtg atcagcaaaa
    36661 agtctgcggt cgccgttgca gaggcggccg gggtgtctgt tgcctggctg ttgggtgaaa
    36721 aggttgatga agagaacgga ttaaaagaac gtgagcgaga aatgcttcag ttgttcaggc
    36781 agttccccga agccgagcaa gataagatga tcaccctgtt ccagctccgg ctgaaagaat
    36841 tggatgacta tgtagaaaag tatttacgag gtcgctataa gctcatcgac atcaaagatg
    36901 agtgattgac gcgtggcgtc ccgcctgcat cccgcttcgg cgggattttt tttgcccaaa
    36961 aacctcatga cacaaaccaa cccccaacca agactcagca aatattcagc aaatataaat
    37021 cttaaattta taaaaatgaa aatctaagat tgacacaaaa gtaaaccagt gctttaatct
    37081 ccacatcaac gcagcaacac cacaacgcga taagcatcag gcaagactac gagttacctg
    37141 atgacgcgaa ggggttaagt agccagccgt ggcatacgaa cagacggcag ttgttgtaga
    37201 tactgagggc gtttcgcggt gtggtggtgt gattttttcg taaaggattt gagttcttcc
    37261 tgacggaaaa gcgcctgacc aacgcgacat ccaccgcacc agcgaaacgc cctgtaaaaa
    37321 acgcgcagca ggttcaacgt tccgccagcc gggcgataac ggcacaggag atagcaatga
    37381 gcgacttgga atttatcggg tctgtttatc tgtccgaggc tatagcagtg ctggttctgg
    37441 ctatgactgg cggtacaaca aagccgggtc gggtgattgc cgaattgtgg ggtttgacta
    37501 cggcgctaat cgtcattctg gccgtgatag caaaaactat cgagtgggcg ctatgaacat
    37561 tcgtcaattt cgcagggcgc agcgtctggc taatcaggca gtgcagcagc gcagtagtaa
    37621 gaaatggagc gtggcaaacg cgctcatggc acgggcagca gagagaaagt gatggggaca
    37681 atgtttgcgc tggttatcgc aatttgctca acgcatggcg attgcgatcc ggcagtaacc
    37741 ggggtttacg acagtcagca ggaatgcgaa ctggcgatgt acgaagaacg aatccttaac
    37801 ggtgaatgct atccgattga gcggatcatt catcaggctg acgaccaaca gccttaatgc
    37861 gagttctgac taataagaat tatcgtcggc gaattgctga caccggggaa acgtccgcca
    37921 cacgttacgt ggcacacaac aggtaagggc attgaccggg cacaaaatta atgggcaagc
    37981 gctctcaggc gcaaacccta ccggcatcgc gtgacgcacg actgagatgg ggcgacagcg
    38041 cggggttcag tgctctttcc gttgtggtga atgcactgaa ttttccatca gctagtaggt
    38101 gaggttaaag gctcacctag gcgacgacgg agaccttgtg tatgcgcagg ctgatgcgca
    38161 agcattcatg ggatagcact cgtcatgtat ggtggtgact ttccggttga ttgacggttc
    38221 aaatccgtag gcaacaaccc catgagtgaa ccggaagccg gagatcagca ccggccacca
    38281 caacttcact cgcagccagc tccggctccg gcgacggcga ataaaacgca aaaacccgcg
    38341 caaggcgggt ttgtacgccg attggccgac caaagccgct cggtttgagt tctgaccaat
    38401 aaaaactcgg tgagttctat cggacgagcc gagtatcgga gattacctat gaacatgtca
    38461 acagaaattg ctgttgttga aataaagccc gaacaagctc cagccatttt tattcccggc
    38521 ggtcttgatg cttaccttga acagatccgc cagtcagtta acgaagtgcc agatctgagc
    38581 acaaagaagg ggcgtgaccg ggtagcatca ctggcagctc aggtatcacg cagcaagacg
    38641 gcgatcgaaa aaccggggcg tgagtacctc aggcgtttga aagaagccgt taagcccgcc
    38701 gaggctgaaa ttaagcgttt tgttgacgcg tgtgatgcgt tacgagattt aacacgcaga
    38761 cccctcactg attgggagca cgagcaggaa cgcattgctg ctgaaaatca aatgctggca
    38821 tggcatgaag aggccataga aatgaatacc gcattcgata aagcgcttgc tgaacgcatc
    38881 gactctgacc atgaaatagc cctcttactt aacgacaagt ttgaccgcga cctggcagag
    38941 gcgaaagccg aagcagagcg ccagcgcata gctcacgagg aagagctaaa acgtcaggtg
    39001 gaagaacagg ccaagcgtga agctgcggca gcggcacaac gtgaaattga cgcagcggca
    39061 gacagagagc gtgatgcact gctggcgaaa gaacgagccg agcgcgagag acaggaagct
    39121 gtcgaagcag agcgacgtaa agcacaggaa gaagtggatc gcattaaacg cgaagctgaa
    39181 gccaaagaag cagctcgact ggcagaagaa aagcgcattg ctgacgagaa tgctgcccga
    39241 tcggctgatg ttgaacatcg tcgagtcatt aatagatcca ttgttgctga tctgattgct
    39301 gctggaattc ctgatgaatt tgcaacacag gtcgtccggg ctattgcgtc tggcaatgtt
    39361 cgcaacgcaa aaatcaatta ctgaccgagg gcgataatta tatgaaatat aaatcagcat
    39421 tcaggcattt ttcatcgcgt ggagtcagca tcatatggca cagattgaat gtatctatgg
    39481 caaaagaatg ccgcattagg gggtatcggc gcgaggctgc gcattattta atgatggccg
    39541 cacattcacg cgctgatatt caatattttc tgccaaccgg taaagagcca ttttgaggaa
    39601 taatcaatga aatttgaaaa ggcaatgcgc aagaaagcca agctgcggct ggcacttacc
    39661 gggccgagcg gatcagggaa aacttatagc gcgctgatga tatgcaaaag catgggtggg
    39721 aaaacagcgg ttattgatac cgaaaaagga agcgcatcac tctactcaaa tgaattcgat
    39781 ttcgatgtac tggaattgga tcctccattc agtcctgagc gctttattga agctattggc
    39841 gctgcggaag cggctggtta cgacaatcta atcatcgact caatatcgca tgagtggagc
    39901 ggggttggtg gttgccttga tgatctggat accattgcaa aaacaaaatt taaggggaac
    39961 acccacgcag cttggagcgc attaacccca cgtcatcgaa agtttcttga cgccattctt
    40021 cgcgttaatt gccatctggt tgctaccatg cgtagcaaaa cggaaacagc acaacaggaa
    40081 ggaagcaaaa aggttgtgaa gctggggatg aagactgaac agcgagatgg tgttgaatat
    40141 gaatttacta ctgttctcga catcaatcat gaaactcaca cagctatggc atcaaaagat
    40201 cgtactggtt tgttctcaaa tgctgattac acggtgcttg atgagacggt tggcaagcgc
    40261 cttatggggt ggctaaacga tggtcgttct aaagcggaaa tagaccttgc acactttgtc
    40321 actaccgcag agtcggcacc ttctttcgaa caactgaaat cggcttgggc ggaggctttt
    40381 aggacattac gagacacgcc agagcaggcg aaagctcagg aagtatatga ggccagaaaa
    40441 gcagaattaa ccagaaatta acaggtggca taaatggcaa gcaagggcgt taacaaagtg
    40501 attcttatcg ggaatctggg tcaagacccg gaagtccgtt acatgccgaa tggcggcgca
    40561 gtcgctaacc tgactctggc cacgtcggac agctggcgcg acaagcagac cggcgagcag
    40621 aaagaacgta cagagtggca ccgcgtcgcc ctctacggca agctggcgga aatcgccggt
    40681 gagtacctgc gcaaaggctc tcaggtgtat atcgaaggtc agttgcgtac ccgcaaatgg
    40741 caggatcaga gcggccagga tcgctacacc actgaagtgg tggtcgatat ctccggcagc
    40801 atgcaaatgc tgggcggccg taccggcggc ggcgcacctg ctggtggcaa catgggcggc
    40861 aatatgggtg gtggtaacgc actacaaggt ggttggggtc aaccgcaaca gccgcagcaa
    40921 gccaaccaat tcagcggtgg cggtcaaccc cgtccgcagc aaagcgcccc gatgccgggc
    40981 aacgaaccgc cgatagattt tgacgacgac attccgttcg cgccaatcgg attgcaattt
    41041 aatagacatt ccattcactc aatttaaata aaatcgcctc ggtacactta accactcggt
    41101 ggaatttttg ccgtgcaaaa taaatggtga gcataatgat gctggaatat caacttgatg
    41161 aaaaaacaaa atcagacgca attaaaaaaa tacaacttgg gtttgttggc gatctaaaga
    41221 aagaatcaaa atatgagcga tggttaaaaa cgattgtgta taaaacgtca ttttatccgt
    41281 tgccaaaaca agataatgac ttcttcattc aagattcatt cggtaaatat cgtggatatg
    41341 gtcaaaatag gcgtatgggt gattaaccat taattaccaa tataatgtta acaacaaaaa
    41401 ataacattga gattaataat gaaaacatca cgcgacagca taatagtcgg gaaggttgag
    41461 attgtttatt caacatcaaa aaatggctgg atcactcccg gcggacaaat catcaggaat
    41521 ccattgaaag cccagcgcat cgccgaaaac ttgaacggta agcaggtgat ggcatgagca
    41581 ctaaatactc tcttatatac gctgacccgc catggagcta cggaaataat gccagcaacg
    41641 gagccgcgag agatcactac gaaaccatgt ctctgaccga tttaaaacgc ctgccaatct
    41701 ggagcctggc ggaagaaaat gcagtgctgg cgatgtggta caccggcacc cacaatcagg
    41761 aggcgataga gctggctgag gcatggggat tccacgttcg cacgatgaag gggttttcag
    41821 catgaaagag cgcggaatga ttttcaatgc tgagatggtt cgcgccattc tttgcgggcg
    41881 taagacgcag acgcggcgga ttatgaagcc gcaacgtgag ggacctaact ggtcagtcaa
    41941 gccagctcag tcgccaatga ccaaagggca tacacatgac tggtggttac ctaacgggac
    42001 tctcccatat tccgcattgc cgcgttgccc atatggggtt atcggcgatc gcatctgggt
    42061 gcgtgagacg tgccgtgccg tagagattga gtccggactg gatgttgttc gttatgacgc
    42121 tgacggctta gatattccgg tcaaatcaca cccattagat gcggggttgt gggttgatct
    42181 gtaccggtat cgaagtggca agggaaaaca ggttccgtca atccacatgc cgcgctgggc
    42241 atctcgaatc acacttgaga ttaccggtgt gcgggtggaa cggttgcacg ccattacctt
    42301 gggggatatc tgcaaagagt ttggatgtgg cttgtatgac ttccgacctg ccacttatgg
    42361 cttcacggca tgggaagaat tatggaaatc catctacggc gaagaaagct ggcaggctaa
    42421 cccgtgggtt tgggtcatcg aatttaagcg catctgaatt cagaaaatcg tgcgccctaa
    42481 tttttattga ataacatggt tggctctaaa cggagttaac catgcataaa aagtggatgc
    42541 cgggcgtaaa tttattatct gagtttgatt taaaaatggg tcgcttgtcc tacagcgtca
    42601 gaaatagaac cctgactcag caggatatag ataatgcctg cgccgatgct gatgaaataa
    42661 taaaatcgct ggagagaaac aatgggaagc gaatttttaa gcaaagatga cttggtgtat
    42721 ctgacgggtc atatataccc atcaaaacaa atagaggttt tacgccgagc cggaatatca
    42781 ttcataccaa acagggacgg ccatccgcgc acaacatgga cgcacgttaa tgccgtatta
    42841 aacggaacgc cagcgccaga acttgaagat gatgatattg gaataaattt taatggaatt
    42901 tagatttaat gggacgaaag cgaattaatc cggaagataa caaactacct ccgcgagtca
    42961 gaaaaaataa atatagctac atattcaaac ccgcaaaaac aaaagagacg atcacgctag
    43021 ggaaaattcg tgatttatct atagcgcagg tatgggaaaa atacgaaaag attattagct
    43081 caaaacgtga cgtaatgacg tttggtaaat tgtggggatt ttttctcgat agtgagtatt
    43141 acaaagattt gtcgccgcgc actcagtctg actacctaca gcaccaaaag aaactgctgc
    43201 acgcttttgg caatgccaag gccgatgcaa taaagccaga gcatgtcagg cgttatctcg
    43261 acatccgggg aaaaagctcg cgcacgcagg cgaatcagga aaaaagtagc atgtctcgcg
    43321 tatttcgctg gggctatgaa cgtggttacg tgaaatcgaa tccatgcgcg ggtatatcga
    43381 aatttactgt aaagtctcgc actacataca tcgatgattc cgaatacgtg gcgatctaca
    43441 aagaggcaac accggcgcta cagtgtgcca tggaaattgc ctatctgtgc gcggcgcgga
    43501 ttggcgacgt ccaggatctg gaatggagcc aggaaaccga gttgggtttg tttgttcaac
    43561 aaggaaagac cggcgttcgg cagatcaagg tgtatagcga cagattgcgc gctgcgctcg
    43621 atcaggccag aacgcttggc ggcgcacggc acatcatcgt caataaattt aaggagaaat
    43681 acagttacaa agggctcaat acgctgtggg ttaatgcgcg gcgggaggca agtcaaaagc
    43741 tgggttatga gctgacgtgc cattttcatg acatcaaagc gaagggaatt tcagattacg
    43801 agggcagcag ccgcgacaag caaattttca gcgggcacaa gacggaggct caagtgatca
    43861 catacgaccg caaaacgaaa atcagcccaa cgctagacct gccgctaata gatgatgatg
    43921 aatagctatg caaaacaatg aaatgggtat accaacaaaa tataccaaca atatagtaac
    43981 agggtaaaaa ttgggtgggg taattaaatg taagtcattg aaagaagtgg cggaggagta
    44041 gagattcgaa ctctagaacg ctttcgcgtc gccggttttc aagaccggtg ccttcaacca
    44101 ctcggccact cctccgcaac gacgcgaact ataaacagtg tgtcggatat tgtaaagtga
    44161 cataacgttc aatcgcctga aaaacaggca acaactgatt gaaagtatac aaaatcgcca
    44221 tcagactcaa acttttaccg tcaagtaggt tcaagtcagt aaagaagggt aaaacggctt
    44281 taataacata gtgcaactac ttactctctc tacagacaca atggccccct taacagagag
    44341 agtcgttatt atggatcgta tcattgcctc ctctacgcgt gagcaatcgc tgctcagtac
    44401 ccacaaggtg ctgcgtaata cctatttcct gctgtcgcta acgctgggtt tctctgctgt
    44461 cactgccacg cttagcacca tgctgaatct gccgtcaccg ggatttctgc tgacgattat
    44521 cggcttttac ggcctgatgt tcctgaccta tcgtctggct gaccgcccgg cggggatcct
    44581 cgctacattc gcgttgaccg gctttatggg ttataccctc ggtccactac tgaatgcgat
    44641 gattgccgca ggtgcgggtg acattattat gctggcgttg ggcgggaccg cactggtgtt
    44701 cttctgttgt tccgcttacg tgctgaccac tcgtaaagac atgtctttcc tgtccggtat
    44761 gctgatggcc ggtttcgtcg tcttactggt ggccactatc gctaacctgt tcctgcattt
    44821 accggggtta catctggcga tcagtgcgat gtttattctg ttctctgcgg gcgcgatttt
    44881 gtgggagacc agtaacatta tccacggtgg cgaaacaaac tacatccgtg caaccgtcag
    44941 tctgtatgtt tccatctaca acctgtttgt cagccttctg agcctgctgg gtatgtcccg
    45001 cagcgagtaa cgccagccga catcaggcaa ccagacaagg caccttcggg tgccttgttg
    45061 catttgggcc atccgggaaa caaaaaatgg tgaggtgctg tcgatattct aacgaaggct
    45121 cctcactgac gtatcaacct atccccataa gcccgcatcc agtcagccaa agaatccagc
    45181 gtgtcgcgca atgtctttcc caaagcggtg atttcatatt ccactcgtgg tggtacttcg
    45241 gcatagaccg tgcggcaaac tagtccacgt aattcgaaca aacgcagttg ccgggttagc
    45301 tctttctgag tgatgggagc caccgcacgc tgtagatcgc taaagcgcat gggtttgtcg
    45361 ataatgatca gccgatacag gatgggaata gcccacttac cggagatcag gttcacgaag
    45421 tccaccatcg ggcaacgttc cgtggactga acctctgccg acgcctgcct gagtattgcc
    45481 ataactatcc atcctctcca ttagtatcca aaaggttcct actatgcaaa ggataccatt
    45541 aatcagataa tatagctttc agctcatcag aaggataaca gcatgccaag actgcaagat
    45601 aaatatacgc tgatcacggg gggtaccagt ggcatcggcc tggaaactgc acgtcaattt
    45661 ttgaaagaag gcgcaatggt cgccatcacc ggacgcaacc aagaaagcct gtcggcagcc
    45721 ggtagggaat tgggtgatac ggtgctgcta cttcagagcg acgctggtga tatggctgac
    45781 cagcgcacat tggccaagca gattgcacaa cattggccac gccttgacgt actgtacgta
    45841 aatgcaggtg atgtgtcaca ccgcccgtta caggagtggg atgaagcgac gtatgaccgg
    45901 ctcatggata ccaatctcaa aggtccattc tttctcattc agtccttact gcccttgctg
    45961 gcaaatccgt cttccgtcat tttgtgtggt tcggtcagtg cacatatagg cctgccgcaa
    46021 agcagcgtct atgctgccag caaggcagga ttgctctcgc tggcccgaac actatccggt
    46081 gaacttgcag gacgaggcat tcgggtcaat ggcttaagcc caggcccgac tgagacggcg
    46141 gccctaggca agctggggct tccaccacag gaagaggatg ccttacgcga acaaatcaag
    46201 aatctcgtcc ccatcggccg tctgggtacg ccgtgggaat tggcaaaggc agcagtattc
    46261 ctggcttgcg atgagtccag ctttatcgtc ggcactgaac tgcaggttga tggcggcgtg
    46321 agtaacctct aagtacaccg tttcccctcc gtccttgatg catgtacctt ctctgcctct
    46381 gtcgcaaagt ttgctagact aggcccgttt tcacgtgata ccgaggcaat atgttagagt
    46441 ttgaaggcaa ggtcatcgaa accgatgccc agggatatct gaaagatagc agcgactggc
    46501 aggaagacat ggctcctcta ttggcagagc aggaaggcat cacgctcacc gaggcgcact
    46561 gggaagtggt gcgttttgtc cgggcgtttt acctcgaatt taatacatcc cctgccatcc
    46621 gtatgctggt taaagccatg gcccaaaaat acggagagga aaaaggcaac agccgttatc
    46681 tttatcgtct gtttcccaaa ggcccggcca agcaagcgac caaaatcgcc gggctgccaa
    46741 agccggtgaa atgtatctga
//
