# Supplementary material for: May the Phage be With You? Prophage-Like Elements in the Genomes of Soft Rot Pectobacteriaceae: Pectobacterium spp. and Dickeya spp
Source: Front Microbiol. 2019 Feb 14;10:138. doi: 10.3389/fmicb.2019.00138 (PMC6385640; doi:10.3389/fmicb.2019.00138)
Supplement: Supplementary file 2 [file Data_Sheet_2.ZIP › Supplementary_prophagesGENBANK_files/Genbank FILES _SRP_prophages/phiDze4.gb]

LOCUS       Exported               58230 bp ds-DNA     linear   UNK 02-AUG-2018
DEFINITION  phiDze4.
ACCESSION   .
VERSION     .
KEYWORDS    .
SOURCE      phiDze4
  ORGANISM  phiDze4
REFERENCE   1  (bases 1 to 58230)
  AUTHORS   .
  TITLE     Direct Submission
  JOURNAL   Exported Aug 2, 2018 from SnapGene Viewer 4.2.3
            http://www.snapgene.com
FEATURES             Location/Qualifiers
     source          1..58230
                     /organism="prophage phiDze4"
                     /mol_type="genomic DNA"
                     /note="/genome_id=6666666.356844"
                     /note="/genome_md5="
                     /note="/project=robertczajkowski_6666666"
                     /db_xref="taxon:6666666"
     CDS             61..348
                     /codon_start=1
                     /product="Histidinol-phosphate aminotransferase (EC 
                     2.6.1.9)"
                     /EC_number="2.6.1.9"
                     /label=Histidinol-phosphate aminotransferase
                     /db_xref="SEED:fig|6666666.356844.peg.1"
                     /db_xref="GO:0004400"
                     /translation="MRRNVAELSENRRWLSDSLKTLPNVETVYASESNYLLVRFTDSPA
                     VFKSLWDQGIILRDQNKQPGLAGCLRISIGTRYECERVISALQALSGKTA"
     CDS             363..1430
                     /codon_start=1
                     /product="Histidinol-phosphatase (EC 3.1.3.15) / 
                     Imidazoleglycerol-phosphate dehydratase (EC 4.2.1.19)"
                     /EC_number="4.2.1.19; 3.1.3.15"
                     /label=Histidinol-phosphatase
                     /db_xref="SEED:fig|6666666.356844.peg.2"
                     /db_xref="GO:0004401"
                     /db_xref="GO:0004424"
                     /translation="MGLKYLFIDRDGTLIAEPPEDYQVDRLDKLALEPDVIPSLLTLQK
                     AGFKLVMITNQDGLGTSSFPQEDFDPPHNLMMQIFTSQGIRFERVLICPHFPGDNCDCR
                     KPKTALVDAFLKDNVMDSANSFVIGDRETDVQLAHNMGITGLRYQRDGLNWQAITAQLT
                     KRDRHAHVNRVTRETAIDVNVWMDREGGSKIHTGVGFFDHMLDQIATHGGFRLNIDVKG
                     DLYIDDHHTVEDTGLALGEALNKALGDKRGIGRFGFVLPMDECLARCALDISGRPHLEY
                     KAEFNYQRVGDLSTEMVEHFFRSFSYAMGCTLHLKTKGRNDHHRVESLFKVFGRALRQA
                     IRVEGDTLPSSKGVL"
     CDS             1430..2020
                     /codon_start=1
                     /product="Imidazole glycerol phosphate synthase 
                     amidotransferase subunit (EC 2.4.2.-)"
                     /label=Imidazole glycerol phosphate synthase amidotran
                     /db_xref="SEED:fig|6666666.356844.peg.3"
                     /db_xref="GO:0003824"
                     /translation="MNVVILDTGCANLSSVMYAVKRLGYEPQVSREPEVVLRADKLFLP
                     GVGTAQAAMDQLAERQLIALIKACTQPVLGICLGMQLLGSRSDESGGIDTLGIIDTPVV
                     QMADRGLPLPHMGWNQVTSQAGHRLFRDIPDGSYFYFVHSYAMPVCANTIAQSHYGDAF
                     TAAVQKDNFYGVQFHPERSGAAGAQLLKNFLEM"
     CDS             2027..2764
                     /codon_start=1
                     /product="Phosphoribosylformimino-5-aminoimidazole 
                     carboxamide ribotide isomerase (EC 5.3.1.16)"
                     /EC_number="5.3.1.16"
                     /label=Phosphoribosylformimino-5-aminoimidazole carbox
                     /db_xref="SEED:fig|6666666.356844.peg.4"
                     /db_xref="GO:0003949"
                     /translation="MIIPALDLIDGQVVRLHQGDYGQQRQYGSDPLPRLQDYQQQGAQV
                     LHLVDLTGAKDPAARQIPLLKTLLAGVSVPVQVGGGIRTEHDVEALLAAGATRVVIGST
                     AVKQPELVQQWFARYGADALVLALDVRIDAAGVKNIAISGWQENSGITLEQTVERYLPF
                     GLKHVLCTDISRDGTLQGSNVELYREISARYPQVAFQASGGIGSLSDIAALRDSGVRGV
                     IVGRALLEGKFNVTEAISCWQNG"
     CDS             2746..3522
                     /codon_start=1
                     /product="Imidazole glycerol phosphate synthase cyclase 
                     subunit (EC 4.1.3.-)"
                     /label=Imidazole glycerol phosphate synthase cyclase s
                     /db_xref="SEED:fig|6666666.356844.peg.5"
                     /db_xref="GO:0000105"
                     /translation="MLAKRIIPCLDVRDGQVVKGVQFRNHEIIGDIVPLAQRYAQEGAD
                     ELVFYDITASSDGRVVDKSWVSRVAEVIDIPFCVAGGIKSVEDAGQILSFGADKISINS
                     PALADPTLISRLADRYGVQCIVVGIDTWHDAETGRYHVNQYTGDEKRTRVTQWETLDWV
                     QEVQKRGAGEIVLNMMNQDGVRNGYDLTQLRQVRDVCQVPLIASGGAGTMQHFLDAFQD
                     AGVDGALAASVFHKQIINIGELKQFLKQQGVEIRVC"
     CDS             3516..4130
                     /codon_start=1
                     /product="Phosphoribosyl-AMP cyclohydrolase (EC 3.5.4.19) /
                     Phosphoribosyl-ATP pyrophosphatase (EC 3.6.1.31)"
                     /EC_number="3.6.1.31; 3.5.4.19"
                     /label=Phosphoribosyl-AMP cyclohydrolase
                     /db_xref="SEED:fig|6666666.356844.peg.6"
                     /db_xref="GO:0004635"
                     /db_xref="GO:0004636"
                     /translation="MLTEQQQSQLDWQKTDGMMPAIVQHAVSGEVLMLGYMTQDALQVT
                     QETGHVTFYSRTKQRLWTKGESSGHFLSVVSITPDCDNDTLLVLVNPVGPTCHLGNTSC
                     FHPAETQWQFLYQLEQLLAERKHADPTSSYTARLYASGTKRIAQKVGEEGLETALAATV
                     HDREELTNEASDLIYHLLVLLQDQELDLGTIIQRLKERHTK"
     CDS             4344..4994
                     /codon_start=1
                     /product="hypothetical protein"
                     /label=hypothetical protein
                     /db_xref="SEED:fig|6666666.356844.peg.7"
                     /translation="MKFTNSRVRPLSILATTVVLFSQPSQATSSEVENVLKRNGLDNTQ
                     IMTLYRNGELSVKEDTQLHTLTLVNQAVVETPQSTIRNAKYWYHAMPLSEYRTFEANGL
                     TALPCTQQYTDCKLTLEHSYTQKSLSKDKAGVLIQFSTPKEGWLYEDFVTRHHCPVKQE
                     GGGSFILGEKGKAAVASGECDKEYRGMGLGNVFNNYLKQKSVTPIIAYVLLPK"
     CDS             complement(5171..5455)
                     /codon_start=1
                     /product="Integration host factor beta subunit"
                     /label=Integration host factor beta subunit
                     /db_xref="SEED:fig|6666666.356844.peg.8"
                     /db_xref="GO:0003677"
                     /translation="MTKSELIERLAGQQSHIPAKVVEDAVKEMLEQMATTLASGDRIEI
                     RGFGSFSLHYRAPRVGRNPKTGEKVELEGKYVPHFKPGKELRDRANIYG"
     CDS             complement(5545..7254)
                     /codon_start=1
                     /product="SSU ribosomal protein S1p"
                     /label=SSU ribosomal protein S1p
                     /db_xref="SEED:fig|6666666.356844.peg.9"
                     /db_xref="GO:0003723"
                     /translation="MDVKFENPKIINMTESFAQLFEESLKEIETRPGSIVRGVVVAIDK
                     DVVLVDAGLKSESAIPVEQFKNAQGEIEIQVGDEVDVALDAVEDGFGETLLSREKAKRH
                     EAWLMLEKAYEESATVTGVINGKVKGGFTVELNGIRAFLPGSLVDVRPVRDTLHLEGKE
                     LEFKVIKLDQKRNNVVVSRRAVIESENSAERDQLLENLQEGMEVKGIVKNLTDYGAFVD
                     LGGVDGLLHITDMAWKRVKHPSEIVNVGDEITVKVLKFDRERTRVSLGLKQLGEDPWVA
                     IAKRYPEGTKLTGRVTNLTDYGCFVEIEEGVEGLVHVSEMDWTNKNIHPSKVVNVGDVV
                     EVMVLDIDEERRRISLGLKQCKANPWQQFAETHNKGDRVEGKIKSITDFGIFIGLDGGI
                     DGLVHLSDISWNVAGEEAVREYKKGDEIAAVVLQVDAERERISLGVKQLAEDPFNNYLS
                     VNKKGAIVTGKVTAVDAKGATVELADGVEGYLRASEASRDRIEDATLVLNVGDEIEAKY
                     TGVDRKNRVVSLSIRAKDEADEKDAIASVNNKQEEGNFSNAMAEAFKAAKGE"
     CDS             complement(7322..8008)
                     /codon_start=1
                     /product="Cytidylate kinase (EC 2.7.4.25)"
                     /EC_number="2.7.4.25"
                     /label=Cytidylate kinase
                     /db_xref="SEED:fig|6666666.356844.peg.10"
                     /translation="MAVTAPVITVDGPGGAGKGTLCKALANALQWNLLDSGAIYRVLAL
                     AALHHQVDITSEEALVPIASHLDVQFVPEDGQLKVILEGEDVSNEIRTQEVGNTASQAA
                     VFPRVREALLRRQRAFRDAPGLIADGRDMGTVVFPDAPVKIFLDASAEERAKRRMLQLQ
                     AKGFNVNFERLLSEIKERDDRDRNRSVAPLVPAPDALVLDSTHMTLDEVVKQALAYVRQ
                     VLPQLA"
     CDS             complement(8230..9519)
                     /codon_start=1
                     /product="5-Enolpyruvylshikimate-3-phosphate synthase (EC 
                     2.5.1.19) # AroF"
                     /EC_number="2.5.1.19"
                     /label=5-Enolpyruvylshikimate-3-phosphate synthase
                     /db_xref="SEED:fig|6666666.356844.peg.11"
                     /translation="MQESLTLQPISLIDGTINLPGSKSVSNRALLLAALAKGTTRLTNL
                     LDSDDVRHMLNALSALGVEYHLSASRTECDIVGLGGAFTASAPLELFLGNAGTAMRPLA
                     AALCLTEGDIVLTGEPRMKERPIGHLVDALRQGGARIDYLEQENYPPLRLRGGFQGGEI
                     SVDGSVSSQFLTALLMTAPLAAQDTQITIKGDLVSKPYIDITLHMMQTFGITVTNNNYQ
                     TFVVAGNQHYQSPGHYLVEGDASSASYFLAAAAIRGGTVRVTGVGRNSVQGDIRFADVL
                     EKMGAQVRWGDDYIECQRGELHAIDMDMNHIPDAAMTIATAALFAEGGTTTLRNIYNWR
                     VKETDRLAAMATELRKVGAEVEEGHDYIRITPPKQLKAAEIGTYNDHRMAMCFSLVALS
                     DTPVTILDPKCTAKTFPDYFQQLERLSQHG"
     CDS             complement(9629..10714)
                     /codon_start=1
                     /product="Phosphoserine aminotransferase (EC 2.6.1.52)"
                     /EC_number="2.6.1.52"
                     /label=Phosphoserine aminotransferase
                     /db_xref="SEED:fig|6666666.356844.peg.12"
                     /db_xref="GO:0004648"
                     /translation="MTQVFNFSAGPAMLPVEVLRRAEQELCNWHGLGTSVMEISHRSKE
                     FMQVASESEQDLRDLLKIPSNYKVLFCHGGARAQFAAVPLNLLGEKTHADYIDGGYWAH
                     SAVKEAEKYLTPTVIDVKTSADGLRGVKPMSEWVLSDDAAYVHYCPNETIDGLAIEEEP
                     DFGDKIVVADYSSSILSRPLDVSRYGVIYAGAQKNVGPAGLTLVIVRDDLLGKARRELP
                     SILDYKILADNDSMFNTPPTFAWYLSGMVFKWLKEQGGLLEMEKRNQAKADLLYSAIDG
                     SDFYRNDVVPGSRSRMNVPFQLADAALDPVFLQEAQAAGLHALKGHRVVGGMRASIYNA
                     MPLSGVKALTEFMADFERRHG"
     CDS             10979..12742
                     /codon_start=1
                     /product="hypothetical protein"
                     /label=hypothetical protein
                     /db_xref="SEED:fig|6666666.356844.peg.13"
                     /translation="MTQTFIPGKDAALEDSIARFQQQLLDLGFNIEEASWLNPVPNVWS
                     VHIRDRDCALCFTNGKGATRKAALASALGEYFERLSTNYFFADFYLGQHIAEGDFVHYP
                     DEKWFPLPEDDSLPEGILDARLHAFYDPEQQLVASDLIDLQSGNHDRGICALPFTRQSD
                     QQTVYIPMNIIGNLYVSNGMSAGNTRNEARVQGLSEVFERYVKNRIIAESISLPSIPAE
                     VLSRYPGVVEAIATLEQEGFPIFAYDASLGGQYPVICVVLFNPANGTCFASFGAHPDFG
                     VALERTVTELLQGRGLKDLDVFTPPTFDNEEVAEHTNLETHFIDSSGLISWDLFKTQSD
                     YDFADWNFSGTTEQEFATLMAIFNKEDKEVYIADYEHLSVYACRILVPGMSDIYPAEDL
                     LLANNSMGAHLRETLLSLPDSQWEKEDYLALLQQLDDEGLDDFTRVRELLGIATGKDNG
                     WFTLRIGELKSMLALAGGDLEQALSWAEWSLDFNQSVFSAERGNYYRCLQTLLQLALEP
                     ERDPAQYYDAFVRMYGQDAVDAASAAIAGEQCFYGLFTVDADLKALPAHQSLLAAYGKL
                     QRAKRAHWQVK"
     CDS             13392..14249
                     /codon_start=1
                     /product="Formate efflux transporter (TC 2.A.44 family)"
                     /label=Formate efflux transporter
                     /db_xref="SEED:fig|6666666.356844.peg.14"
                     /db_xref="GO:0005215"
                     /db_xref="GO:0006810"
                     /db_xref="GO:0016020"
                     /translation="MKADNPFTLLLPPAMAKVAEDAGVYKATKQPLTTFFLAITAGVFI
                     SIAFVFYITATTGSSSMPYGMAKLVGGICFSLGLMLVVVCGADLFTSTVLIVIAKASGR
                     ITWKQLGLNWLNVYVGNLIGALFFVALMWFSGEHTVANGAWGLNVLQTANHKLEHTFVE
                     ALCLGILANLMVCLAVWMSYSGRTLTDKMLAMILPVAMFVASGFEHSIANMFMIPMGIV
                     VKNFAPETFWHAISMTPGQFEHLTISNFIVDNLIPVTIGNIIGGGLLVGLTYWVIYLRG
                     GDQH"
     CDS             14306..16588
                     /codon_start=1
                     /product="Pyruvate formate-lyase (EC 2.3.1.54)"
                     /EC_number="2.3.1.54"
                     /label=Pyruvate formate-lyase
                     /db_xref="SEED:fig|6666666.356844.peg.15"
                     /db_xref="GO:0008861"
                     /translation="MTELNQKLAQAWEGFSKGEWQNGVNVRDFIQKNYAPYEGDESFLA
                     GATPATTKLWDAVMEGIKQENRTHAPVDFDTDVAATITSHDAGYINKGLEKIVGLQTDA
                     PLKRALIPFGGIKMVEGSCKVYGRELDPQLKKIFTEYRKTHNQGVFDVYTPDILRCRKS
                     GVLTGLPDAYGRGRIIGDYRRVALYGIDYLMADKFAQFTSLQSKLENGEDLEATIRLRE
                     EIADQHHALSQIKEMAAKYGCDIAGPATNAKEAVQWTYFGYLAAVKSQNGAAMSFGRVS
                     TFLDVYIERDLKAGKITEQDAQELIDHLVMKLRMVRFLRTPEYDELFSGDPIWATESLA
                     GMGLDGRTLVTKNSFRFLNTLYTMGPSPEPNMTILWSEKLPLNFKKFAAKVSIDTSSLQ
                     YENDDLMRPDFNNDDYAIACCVSPMVVGKQMQFFGARANLAKTMLYAINGGVDEKLKMQ
                     VGPKSEPIKGDVLNFDEVMERMDHFMDWLAKQYVTALNIIHYMHDKYSYEASLMALHDR
                     DVFRTMACGIAGLSVAADSLSAIKYAKVKPVRDESGLAVDFNIEGEYPQFGNNDPRVDD
                     LACDLVERFMKKIQKLNTYRGATPTQSVLTITSNVVYGKKTGNTPDGRRAGAPFGPGAN
                     PMHGRDQKGAVASLTSVAKLPFAYAKDGISYTFSIVPNALGKDDDVRKTNLAGLMDGYF
                     HHEASIEGGQHLNVNVMNREMLLDAMENPEKYPQLTIRVSGYAVRFNSLTKEQQQDVIT
                     RTFTQSM"
     CDS             17240..17485
                     /codon_start=1
                     /product="hypothetical protein"
                     /label=hypothetical protein
                     /db_xref="SEED:fig|6666666.356844.peg.16"
                     /translation="MNEDRVSNEIYESVILMGVCTPLWFEAKKTAYLNKIKEIHVLNRN
                     SRSGFIFESPKSSCEEVGKAKGDGGKIVIAAHTHSK"
     CDS             17774..18019
                     /codon_start=1
                     /product="Phage protein"
                     /label=Phage protein
                     /db_xref="SEED:fig|6666666.356844.peg.17"
                     /translation="MYKYKMVQIPPNIIVNARKVDKDNAAAHYLEQVVNEKAEDGWEFQ
                     RIDTIGVEEQPGCASLLFGKKNGPVNYYVITFRKEA"
     CDS             complement(18280..18501)
                     /codon_start=1
                     /product="hypothetical protein"
                     /label=hypothetical protein
                     /db_xref="SEED:fig|6666666.356844.peg.18"
                     /translation="MARTRTSRRLSDITIRQYHQCQNLECSETFTTLNTVERRVSKRTR
                     EDPLPPDFIPQDAFPASHYGRDQLNLAL"
     CDS             complement(18565..19704)
                     /codon_start=1
                     /product="Gene D protein"
                     /label=Gene D protein
                     /db_xref="SEED:fig|6666666.356844.peg.19"
                     /translation="MAITDLADSLITTAKRYDDALTEAVKSPAFSITLGGKSLKELSDR
                     LISLSLTDNRGFEADQLTLSIDDSDGRVELPPRGAQIALSIGWQGEALTYKGLYTVDEI
                     SHEGPPDVLGVTARSADFREEFNVKREVSWHDVTVERVVSAIAHRYGMKAQISDMLMNI
                     EIDHADQTEESDMSFLTRMAEQLGAIATIKNGTLLFILPGGGVTASGKALPSASITRSS
                     GDGHRFRIADRDAYTGVRAYWLDLKFGKKKKVSVKRRRTKPKPKKEKSSSREGDYITGA
                     EGNVFVLRKTYQNEEVARRAAAAKWRQLQRGAAEFSITLARGRAELYPEMHLTVSGFKP
                     DIDNQDWIIARAEHVIDGNGFTTRLELEAKIPDWIAESE"
     CDS             19857..21035
                     /codon_start=1
                     /product="Major tail sheath protein"
                     /label=Major tail sheath protein
                     /db_xref="SEED:fig|6666666.356844.peg.20"
                     /translation="MSETRFHGVRVRENTDLVTAINDIDSSVIGVVAVAEDADADTFPL
                     NTPVLITRVNSVLGKAGKTGSLYKTLKAISDQTSPKVIVVRVAAATEGGDKTQSQLIIG
                     GTAADGSYTGMYALLTAEAKVNYRPRILAVPDYDTAEVTSALCVIAQNLRAFVYAGCHG
                     CTTMAEAITYRAQFAYRELMLIWPDFIAYNPLTGSNETFPASAYACGLRAAIDNDQGWH
                     KSLSNVAVNNVLGISRDVFWSLQAEDSDANELNNQEITTLIKRNGFRFWGNRTTDTHDY
                     LFEVYTRTAQILADSIAEAQFEAVDEPLTPANVKDVVNGINGKLSALVTAGRLIGGECW
                     FDIQDNPTTGLRQGQVRVRYKYTPVPPLEDLTLYQTFTDDYFDSAFSSLGGV"
     CDS             21036..21551
                     /codon_start=1
                     /product="Major tail tube protein"
                     /label=Major tail tube protein
                     /db_xref="SEED:fig|6666666.356844.peg.21"
                     /translation="MAVPHKLRLFTCFVNGNNQIGKVTSVTLPKLTRKTEDFQGAGMIG
                     SVAVDLGMDSGALEAQMVVGGMEKKLLLEYGGDIDDVRLRFAGEYYTDGDSQLVEVEMR
                     GRITEIDGGESKQGEDTSVTYALKNTYYKLSIDDQSVLEIDLLNFIYKKNGKNIYPDRI
                     TSALGLGN"
     CDS             21564..21914
                     /codon_start=1
                     /product="putative phage tail protein"
                     /label=putative phage tail protein
                     /db_xref="SEED:fig|6666666.356844.peg.22"
                     /translation="MAATSRLEPVTMNTPNEHTVTLATPIVRGDNAISQVSITDDIKQA
                     GSLRGLRLVNVLNMDVDSITTLLTRVTSPKLKLAEINAMDTRDFMRLAEAITPFLVHAE
                     PGEPNAEATEEA"
     CDS             21920..22078
                     /codon_start=1
                     /product="hypothetical protein"
                     /label=hypothetical protein
                     /db_xref="SEED:fig|6666666.356844.peg.23"
                     /translation="MQFDQIDDLVADIAVVFNWPPSELFSMDLGDVIAWRARAAIRSGA
                     SEADEKP"
     CDS             22065..25037
                     /codon_start=1
                     /product="Phage protein"
                     /label=Phage protein
                     /db_xref="SEED:fig|6666666.356844.peg.24"
                     /translation="MKSLDIRVAFSAIDRLTRPVNAARQSAGGLSESLKRTQAAIKDLD
                     NQSRTFNRLRDSVQKTSRKIDEASRSLDGLKKAQQNNTVLTDKQREHMAALAAKLERLN
                     ITRDQEMVKLRAVSQALRGHGVSLVGSNATIQSAIRRTEQYNQTLERERRQLAAVTQAR
                     ARYERMQQTAGKLRGSGVMAVAGGAAAGYAGGQFLAPAVGFDEEMSRVQALTRLDKGDQ
                     QLAALRAQAKKLGAETAFTTRDAASGQAFLAMAGFTPQAIQAALPGVLNMALAGGMELG
                     ETADIGSNILSQFNLDASQMDRVSDVLTGAFTRTNTDLFSLGETMKYTGPVAAKLGISL
                     EDAAAMAGMLANNGIRGSDAGTAMRASLARLASPPKAAAEALKELGVSVADAKGKMRPM
                     QDVLRDLYKATQKYGQVDQVSFFKDIAGEEAFVGLQTLVQAAGSGALGKLSGELKKAKG
                     EADAVAKKMADNLGGDLKNLDSAWEGFRIQVEETTDRPLRSLTQGLSDVITNVSGWVRE
                     NPRLTQTLLLAVGGAAAFAVAIGSTSLAIGLLMGPLAKLQLGFSLLLGARGIGGAVSMF
                     SGLSSLLSGPMARMGGWLQLFSGSAGRLTATLTPLRGMLLAVFTSPVSALGSLVRGVGG
                     LLLRLSGLPVLWSLITGAVSVLGGVLSLLLSPIGLIGAAFVAAGLLIWRFWEPIRTFFS
                     GMFTGIVISLGPIRQAFTSLSPVFDVIVSAVSRLWDRFTQLFQPIQTTKKTLDDCAIAG
                     YGFGKVLGSALDMLLLPLQKLMEGIGWILEKLGLIPSGLDAAQKKADQLKELTPEGKDR
                     LQGLVANLTGDLKGATTAPPPASKPPLTGDSGTQRRLQKIADNTGGVLEETKKRIGPGD
                     IVFKNLPKALAVRGEWQESRLTGSTPSAPSQPAQTMQALSDRPAVVAATQPVKQADASP
                     VSRPAARTPATVGFNGEIHIHLHGVERQDARELGRIVADAVSAELARRDRLQRGSFRDR
                     E"
     CDS             25050..25559
                     /codon_start=1
                     /product="Phage tail protein"
                     /label=Phage tail protein
                     /db_xref="SEED:fig|6666666.356844.peg.25"
                     /translation="MMMVYGLFVFELQTLPYQQLQQSRAWRHVKNERINRSAKWQYIGA
                     GEDQITLSGVLYPEITGGEVSLTALTTQAYSGRPWPLIDGTGQIYGMYVLTGMQTTRTE
                     LNRYGKAKKIEFSLSFQRCDEDLREKLQSSSFSDLMDNARSSANKAMNTVSTAMTDTVN
                     TLKGLV"
     CDS             complement(25588..26196)
                     /codon_start=1
                     /product="Tail fiber assembly protein"
                     /label=Tail fiber assembly protein
                     /db_xref="SEED:fig|6666666.356844.peg.26"
                     /translation="MAEKIITELDENGLAVDAGWITVYHADHVTREYTGKGVEFLMRGT
                     GIPADSYTDVPPPAVEGQAVCRRADGGAWEAVEDHRGKTAYRTADGKPQTVTALGELHD
                     GLTLLTPATAFDRWDGNAWVTDVAAQHAAEVAAAQQEQAARKTAATARITELGYAADLG
                     MATDAEQTALTAWKTYLVQLSRLDTSAAPDIDWPETPST"
     CDS             complement(26198..27379)
                     /codon_start=1
                     /product="Tail fiber protein"
                     /label=Tail fiber protein
                     /db_xref="SEED:fig|6666666.356844.peg.27"
                     /translation="MTTKYYAIMTNTGAALLANATALGRQLSITQMALGDGGGTLPTPD
                     TAQTKLVNERRRAPLNSLSVDPANPGQIIAEQVIPEDEGGWWIREIGLYDANDNLIAVA
                     NCPETYKPQLQEGSGRVQTVRMILIVSSTDAVTLKIDPSVVLATRAYTDTKAAEAKAYA
                     DGQASSAKGESKLYTDNQISGVKTETKSYTDALINGVKGEAKSYSDAQTSSAKIEVKAY
                     ADNLITAHLSAANPHPQYALSTDVTAANQLKLDIAEMVGIPLPWPQAIAPTGWLKCNGQ
                     AFDKTLYPKLAALYPSGTLPDLRGEFIRGWDDGRGVDSERTLLSAQAATWIQPNIENNT
                     AATTIRIDNVDSTFNADEYAAVSNLPAYEHNGSRARSYVRPRNVAFNYIVRAA"
     CDS             complement(27376..27984)
                     /codon_start=1
                     /product="Tail protein I"
                     /label=Tail protein I
                     /db_xref="SEED:fig|6666666.356844.peg.28"
                     /translation="MSNSLLPPSASDFMRNVANSTQRLSEIAVCLDTLWSAERCPAQLL
                     PYLAWALSVDRWDKRWSEQTKRQVIKAAWLVHRQKGTLAALRRVVEPFGYLIRVTEWWQ
                     TGGQPGTFRLDIGVQDAGITEETYLELERLIADAKPVSRHLLGLNIVMDCAGNILLAAG
                     QYSGDALTVYPYFPETITTTGIDVRGAVVHLSDNMSVSA"
     CDS             complement(27977..28873)
                     /codon_start=1
                     /product="Phage baseplate assembly protein J"
                     /label=Phage baseplate assembly protein J
                     /db_xref="SEED:fig|6666666.356844.peg.29"
                     /translation="MATVDLSQLPQPQIIEVLDFEVILQDVKAVMITAFPAAQQASVTA
                     ALSLESEPLTVIAQVIAYREMMLRQRINEGAEACLLSHAVSSDLDNLAANLNTQRLTIA
                     EATDTADAVMEADSALRLRSQAAFEGLSVAGPTGAYEYFAKSASGKVADAKAISPSPAV
                     VVVSVLSTEGDGSASADLLAAVDAALSADDKRPVGDRLTVQSAGIVRYAITAVLYRYPG
                     PESEPIQQAAQQALTSWLGTQGRIGRDVARSAIMAALHVQGVQRVELLEPAQDIVISDT
                     QAAYCTGFTVTEGGSDE"
     CDS             complement(28860..29228)
                     /codon_start=1
                     /product="Phage baseplate assembly protein"
                     /label=Phage baseplate assembly protein
                     /db_xref="SEED:fig|6666666.356844.peg.30"
                     /translation="MTATYTGMNPHGTGTLTDADQLWQSVRDILTTPLASRVMRRDYGS
                     LIPDLLDAPQNAVTRLQLMSAAVIALTRWEPRISLNAVDIRYSASGAVEAELSGLITET
                     MQAASSTLTLRSHGDGDG"
     CDS             complement(29225..29806)
                     /codon_start=1
                     /product="Phage baseplate assembly protein V"
                     /label=Phage baseplate assembly protein V
                     /db_xref="SEED:fig|6666666.356844.peg.31"
                     /translation="MSAELMRLLENLLRVGVVTAVDPESWRVRVKSGELLTDWLRWNTT
                     RAGAFNVWFPPAVGEQVLLGCLGGNPETAVIIGSLFSEAHPAPGNSLKEIVITAPDGAR
                     FRYDAVAGALEATGMKTANVVAAVSVTLNTPVVECTQHLKARTVEITHGGTLTGNVAHS
                     GGAMTSNGVQVDSHRHGGIQPGGSWTSGTQ"
     CDS             complement(29803..30441)
                     /codon_start=1
                     /product="Phage tail completion protein"
                     /label=Phage tail completion protein
                     /db_xref="SEED:fig|6666666.356844.peg.32"
                     /translation="MTDKLFHALDQVFGDILSGLSPAGRLKTARQVGQALRRSQQQRIR
                     AQRNPDGSAYATRRRKVLRSQKGMVLVWEGQVRHLKNWHGGRGKHGRTITGFDEDRNAI
                     RTFYRSDIERYIEINTQAVRRTTSKTTPMFQRLRGYRFLKMQADTEGASVGFDGIAARI
                     ARVHQYGERDKVGPGAFARYPVRELLGISLADERLIHETVINSLGSAAT"
     CDS             complement(30438..30896)
                     /codon_start=1
                     /product="Phage tail protein # FIG072132 and FIG003673"
                     /label=Phage tail protein # FIG072132 and FIG003673
                     /db_xref="SEED:fig|6666666.356844.peg.33"
                     /translation="MLKTDSLRDALTASNTWCRANPEAFTVFVEEGGIETTGETPSFLY
                     RYSLVLFVMNFTGDIDDFTLPLMAWLWQNQPDLLLNPQKNREVKFTTLINNDDSADILF
                     EIPVRERVKVTRDDNGILRAEHLPEPRPRLTGGVWDAVLDDASGVTAI"
     CDS             complement(30907..31041)
                     /codon_start=1
                     /product="hypothetical protein"
                     /label=hypothetical protein
                     /db_xref="SEED:fig|6666666.356844.peg.34"
                     /translation="MTWGAVALWSDQLLDALDTCNADKAAINDVYLRRLQRLNAAATP"
     CDS             complement(31010..31447)
                     /codon_start=1
                     /product="hypothetical protein"
                     /label=hypothetical protein
                     /db_xref="SEED:fig|6666666.356844.peg.35"
                     /translation="MKLAATLAVLLVLAVGGVLWQTYQRGIDRAHTEALTDSAQQQREL
                     LNEVRALADDARNVLAQVREREQQRYAEGEERREKMREDMQPDTCANTVVPAAVSDSLQ
                     KRAAVVQRADTARPGTAQPDGTHTDARTENTGDLGRGRALE"
     CDS             complement(31444..31989)
                     /codon_start=1
                     /product="Phage lysin (EC 3.2.1.17) # Phage lysozyme or 
                     muramidase (EC 3.2.1.17)"
                     /EC_number="3.2.1.17"
                     /label=Phage lysin
                     /db_xref="SEED:fig|6666666.356844.peg.36"
                     /translation="MKTAIKRCSIALIVALGVTLSPGTLRTSPEAQQKTASWEDCRASP
                     YYCPAGVLTVGIGSTGNVQNRPYSNDEIARRWVNDMQRAENCVNGNFNGAAMPQSAFEA
                     MTDTAFNLGCSGLMWFTNRQGSKQRTTIWKHAQAQEWPAMCDRLTDFVNSGGQRSAGLV
                     SRRSDFKAWCLRDLAGVP"
     CDS             complement(31973..32275)
                     /codon_start=1
                     /product="hypothetical protein"
                     /label=hypothetical protein
                     /db_xref="SEED:fig|6666666.356844.peg.37"
                     /translation="MGLNDLQRLNDGVTYGLSVMVTGIGVMTVSEKVALAGLVIGVVTA
                     WRAWLFRRRIERAQRRRNELIEQILQQSERRTLNTSERRAVAILHQGDVDDENRD"
     CDS             complement(32266..32466)
                     /codon_start=1
                     /product="Phage protein"
                     /label=Phage protein
                     /db_xref="SEED:fig|6666666.356844.peg.38"
                     /translation="MVVRALQGDTVDLLCYRHYGTSAGVTEQVIAANPGLSRQMFLAAG
                     QAITLPDIPRQTEQETVQLWD"
     CDS             complement(32466..32957)
                     /codon_start=1
                     /product="Phage head completion-stabilization protein"
                     /label=Phage head completion-stabilization protein
                     /db_xref="SEED:fig|6666666.356844.peg.39"
                     /translation="MSLVAQKRVSDSGDVPEIDDGTATVSAGAFWPVIVLRDLRLAARI
                     TGGITTTRLMHVTIEAVVHVTDQLASWQQTQQAAGYAALADVPARQVNSESIKVYRFRR
                     AVYAIARALLLEGYRDVDTTAKGDKATDTFDNQCDDLWRDARWSIADISGAQRLFAELC
                     "
     CDS             complement(33056..33922)
                     /codon_start=1
                     /product="Phage terminase, endonuclease subunit"
                     /label=Phage terminase, endonuclease subunit
                     /db_xref="SEED:fig|6666666.356844.peg.40"
                     /translation="MLTPAQRHFQRVMAERRGQADTETEVSRTAHEQILHRLRLHQAAL
                     KQVQSDATKAEMKKAMLPEYDGWIDGTLEGDSGRQDEVIVTLMVWAIDCQDSALTLRLG
                     RYVVKHGLSLPADKFRRDAVTVLAEEVSNPVLTLATTDADADLSGYTAVLDEVAAIVDG
                     KDMPDEVRAKLCKARAFSRRAAVDAQTKAEALTLFREAMARNPNAGVKREIATLTRELK
                     KLMPASSDEPEDGAPGDDEATTETPPAASADATQPAVKKTAVRNTTARKTTRPTGKSKA
                     ARQSAKR"
     CDS             complement(33966..35021)
                     /codon_start=1
                     /product="Phage major capsid protein #Fam0066"
                     /label=Phage major capsid protein #Fam0066
                     /db_xref="SEED:fig|6666666.356844.peg.41"
                     /translation="MENTTRNLFDQYISRQAQLNGVQPNAVAMTFSVEPAIQQRMEQAA
                     QESDEFLKQINVFGVKAQEGQKILIGSKGPIASTNNSSDGTSRRNPTDNHSKEPNDYHC
                     RKVNYDSAVSYPQLDAWASQPNFQALISQANARQIGLDRIMIGFNGTTYAEKSNRSANP
                     LLQDCGVGWLQKIRNDAGHRIIKNVTLTARDEDNKIVTKGTYGNLDTAVFDAKNSLLDP
                     WHRRAPDLVVIMASDLLTSSNFPRLNALSQSNPNTELLAGQLIVSQERVGGLPTFLAPY
                     FPSNAVLITSFKNLSVYYLLGALRRSIVEEPEYNRVATYQSSNDDFVVEDYGKVALIDG
                     IQFAQAASDGQ"
     CDS             complement(35047..35886)
                     /codon_start=1
                     /product="Phage capsid scaffolding protein # Fam Scf032"
                     /label=Phage capsid scaffolding protein # Fam Scf032
                     /db_xref="SEED:fig|6666666.356844.peg.42"
                     /translation="MSGTAKPTRKKFRVAVSGPTVDGREIGRDHLYAMAESYNPQVYGA
                     RVNVEHILSPYPGSDFSAMGDVIALSAEDITDGLLKGRAALYAEIEPTERMKQLTGEGK
                     KIYSSIEIDPQFAATGKPYLRGLAMTDTPASLGTDRLKFAAQQRAQVQAFNNLPGEPVM
                     FTEAMEAELVELSEQRSDEGKQWFSRVMGIIGKGRKSDSEQFNQVREAVENVAQSHADL
                     LDSFNTLKTQQQQDSRTIQTLTSELAALTQKLATQDNSYSQRPAASGGNSGAQLADF"
     CDS             36045..37772
                     /codon_start=1
                     /product="Terminase, ATPase subunit"
                     /label=Terminase, ATPase subunit
                     /db_xref="SEED:fig|6666666.356844.peg.43"
                     /translation="MIQDAFVRQRAKQLYWQGYPPAEISRLMGINQNTVYAWKKRDEWD
                     ETPPIQRVTHSIDARLCQLAQKPTKTGGDLKEMDALTRQLKTLNDGQPGNAAGGKKPRQ
                     RKVKNHFSDEQISALRTNILDSLAWHQNGWYEQRHHRNRMILKSRQIGATWYFAREALL
                     RALRDDVAYPYQRHQIFLSASRRQAHQFRGFIQKVAEEVDVELKGGDKIVLSNGAELHF
                     LGTSAATAQSYTGNLYFDEFFWVSNFANLRKVAGAMATLKGLTRTYFSTPSSETHEAYP
                     FWTGARWNEKRSKAQKVAFDVSWKALNSGLLCPDKTWRQIVTLQDVIDHGWEYTDLEEI
                     RDENSPDEYNNLYGCEFVRDGESAFNLNLLFSCGADGYDEWPDWKPFASRPMADRGVWV
                     GYDANGSSGNGDSGAISVVVPPLVAGGKFRTIETQQIRGLEFEEQAKVIEALTFKYNVQ
                     HIAIDGTGIGEAVYQIVKKFFPAAVCFLMSVSSKRALVLKMLQVIRAGRWEYDRSEQAL
                     INAFNAVRRVKTPGGIMTYDTDRARGSNHGDLAWATMLAVINEPLGQEQGGGGFAMEF"
     CDS             37772..38824
                     /codon_start=1
                     /product="Presumed portal vertex protein"
                     /label=Presumed portal vertex protein
                     /db_xref="SEED:fig|6666666.356844.peg.44"
                     /translation="MKRKDKTGTHRAVTASQPDMAAALKSDPGLSAFTFDGPYPVRDGH
                     DLLDNMYCADNGRYYDTPVDWYGLARAFGSASWHQSALYFKRNALTGCFIPHPLLSRQA
                     FSAFVLDWFVFGNGYLERRVNRLGGVLSLRHVPAKYTRRGSDLNTYWFIRQWKDEHTFA
                     TDSVCHVINPDIHQEIYGMPEYMGALLSASLSHSADMFRKLYYDNGSHAGCIIYIGASQ
                     VDTESMDNVKKTLKEARGKGAFKNLLLHAPGGGEKGVQIIPFSQISAKDEFLNIKSVTR
                     DDILAAHRVPPQLMGAMPEGNGSFGDVEKAARVFAINELMPVMEALKHVNDWLGMEVIR
                     FNPYALLKAE"
     CDS             complement(39116..39232)
                     /codon_start=1
                     /product="hypothetical protein"
                     /label=hypothetical protein
                     /db_xref="SEED:fig|6666666.356844.peg.45"
                     /translation="MNSHAQTRTILHNFFDAIFPLSARYARAPGRFLHLHKK"
     CDS             complement(39274..41475)
                     /codon_start=1
                     /product="Subtilisin-like serine proteases"
                     /label=Subtilisin-like serine proteases
                     /db_xref="SEED:fig|6666666.356844.peg.46"
                     /translation="MERNLLLGNGHVLTKKEPLPKGRDGKRYPYTIEEVREHLNPEIDI
                     LLSRFRSLDDAAKPRGESVFNLTLHPAFLGKSYFPEGLLRATGLRDVGSRQVIIRPRKA
                     ARQCDQNKDLVTAQLFVSGDDDAVIRFKEILNSPTAPKGVQKDLIEIESVSFFEGKERA
                     RNFEHAKSDSIKFEVVLHAGVEDDDIVKAYINYAAQYGVSVDYKSKIQVGGLTFIVAHA
                     RPEDMKKTLDFSLIRVVRPMPSLRCTQPNIVRKLSNIVTPEFPNSKAILESERIAIFDG
                     GLGTADLSNWVTEYVYPDTKETSGLLLQHGNEVTSTFLFGRVEENAPSFERPFMNVDHY
                     RVLSPTSGDNGDWDLFDVLKKIQSVLDSGDYKFANLSIGPHLPIGDDEVHAWTAILDQI
                     CAKHGILLTVAVGNDGHEDGDAARIQPPSDMVNALAIGAADRSGEKWGRAPYSCIGPGR
                     SPGFVKPDGIIFGGSDDEPFYTYNPLLGSIVGVQGTSYASPLALRTAAGVAALSGTPLN
                     TIALKALLVHHAETSRKYSREHIGWGRFSEDPNVLIDCANDTATVIYYGSLAKNKYLRA
                     PIPFPDVPFDEAFELTATLCIQTPVDPEHSVNYTRAGMQVTFRPRFGLDDADTDDFFGQ
                     KSQYKTERECRSEGHKWETCLHRSKKFSADTLLSDPVFDIRYHARDSSRHVKGVSAPDM
                     QYAMVISVRVKDFDLYNVIRQRYTILNPIQLRTQISLDT"
     CDS             complement(41475..42557)
                     /codon_start=1
                     /product="putative ATPase"
                     /label=putative ATPase
                     /db_xref="SEED:fig|6666666.356844.peg.47"
                     /translation="MVNVREDELFKLIEQGIKGNANAFTLLCRKMINNIRKNDETFASK
                     LASLVAEGTVLRGASSNAPMPVDGDSRRNLLQETSVNAIVEEPVWNTDISKKLESIVNE
                     RENAVSLFKAGLEPVKTVLLSGPPGVGKTMSAHWLAAKLNLPLLTLDLSSVMSSLLGKT
                     GNNIKSVMDYAKEKPCVLLLDEFDAVAKRRDDDRDVGELKRLVTVLLQTIDEWPATSLL
                     VAATNHPDILDPAVWRRFEHILKFNMPSVELIDRYLVNHDIEPKLSKKLAPFLDGMSFA
                     IINRILNFSKKNVVLKNIPFESSLIEAVVMERVSLDDFSDNDLNIIKYHFDGISNRKIA
                     ELVGVSHPTIANKLQKWGVK"
     CDS             complement(42754..45378)
                     /codon_start=1
                     /product="Phage replication protein # Replication gene A 
                     protein"
                     /label=Phage replication protein # Replication gene A
                     /db_xref="SEED:fig|6666666.356844.peg.48"
                     /translation="MKPEQWAYPWNAPRPAISAPSGVADLRPSLLVTDAETHPTVTRYL
                     SRMVKHALSAPGNDRNLNQAVAQLDHREPNGTQLLIRRGLAEIVRRDHQEAVSGWMKTP
                     EGVEARLHEQPFFIRDVYRQKIEWLRANREPRHISAFFMGTVKKALLRLDAVRAQQGVR
                     DGFASELAAYWGPRWAHLAGFTKHEVINAAHTLAAAIAEMFETECGHTSPEDMTDNEIQ
                     WLYRHLGRELLALRVTPPCWGLVIGDEQARHRIYSAILRITSPEWWGRKLWRLRCEWRE
                     NQFRAIGVIHKKRMPYVSLDALNQWQEQRRKNRAFFQTHELVDEDGNIASLENMVYGSI
                     SNPAIRRHELMTRMAGVEMVAIARGDEGVFLTITCPSRYHANIQNGHPNPKWDHTSPRQ
                     GQRYLCRTWARAMSALNRRGLRPYGFRVAEPHHDATPHWHVLLFMPPADRKAITDILRE
                     YFIAEDRAELGRNTGARFKAKKLDPRKGSATAYVAKYISKNIDGYALDGELDNETGKPL
                     RETAKFAMAWASQHNIRQFQPFGLPPVTVWRELRRLANQLTAVQKENGTFKRGAAQLAD
                     PAMDAVLASADAGCFATYIEKQGGVLIPRERYTVRIAYEDADEQNTYGETPEKIFGVFS
                     PRLGAISRICTRLIKWKIRKKQSADDGASIGTGSGLAVTSPTGDAWSSVNNSTGDEKTA
                     ISAGINGDGYGGCEPLDGEPGDTSTQTFADFERMTDPERRALLSRLRTQPPDRRNNQYS
                     STTQRNKSAEKQVVGKLSDEWRASIADFARSIGWDINTGELRRLVAGNAITFAGHCYVA
                     SADGRLYRMQTRKQKETEYQDKATALLQRIAVLRDASWKLKSSSCAGSGIGMLPTQVKE
                     IKR"
     CDS             complement(45375..46601)
                     /codon_start=1
                     /product="Phage protein"
                     /label=Phage protein
                     /db_xref="SEED:fig|6666666.356844.peg.49"
                     /translation="MIDSRCFQNDTINVISVSGGKDSLAQWLLAIEHGVHHIAVFADTG
                     HEHPQTIEYLGYLESKLGPIKRVKADFSRQIEQKRNFIANNWYQGLIIDLMTDRFDGHW
                     ALAPGFRVQKIMLDDDDDTYFDEYLLYPNGRRERFVWPESVPDDRYNTAVLNGFQWIPS
                     VKGLNQQQAEIEAAARVKSALDNLRPTGNPFLDLCMLKGRFPSTKARFCTFELKHEPVR
                     TQVVLPALDEYDEVISWQGVRAQESPARAGLPVWEEDADNTPGLHVYRPILEWKHEDVF
                     AIAKRHGIKPNPLYQQGCSRVGCMPCIHARKSELAEIFSRWPEEIKRVAEWERLVAACS
                     RRGNSTFFPSTHDPRRAEQRIDIITVDEYGIESYRDWAMTTRGGAQFDLLAAANDKAVC
                     SSVYAGVCE"
     CDS             complement(46601..47557)
                     /codon_start=1
                     /product="Methyl-directed repair DNA adenine methylase (EC 
                     2.1.1.72)"
                     /EC_number="2.1.1.72"
                     /label=Methyl-directed repair DNA adenine methylase
                     /db_xref="SEED:fig|6666666.356844.peg.50"
                     /db_xref="GO:0009007"
                     /translation="MSIIATPLKWVGSKARVMDILREHLPAGDRLVEPFAGSCSVMMNT
                     DYPEYLIADINPDLINLYQVIKEDLKEFIDTAEGLFRTANTAESYYRFRQVFNRSKENR
                     TTSAALFLYLNRHGYRGVCRYNRAGGFNVPYGHYASPYFPLAEIHAFAEKARRAKFICA
                     AFGETLQLIRPGDVVYCDPPYIPQTPTASFTSYHTDGFTHNDQYDLCGALSRLAERGIP
                     VIASNSDTHHAHSLYHRFDICRFTAPRSVGVAAGESKQAGEIIAKRLPIPAAQSLSKVC
                     DGCGYEGGGHCPDCGPVMGDATYQEMVASGALNAEPF"
     CDS             complement(47554..47778)
                     /codon_start=1
                     /product="Phage protein"
                     /label=Phage protein
                     /db_xref="SEED:fig|6666666.356844.peg.51"
                     /translation="MDSMDMAQEREAFIRETQIQQARQQSGCAASAFVCESCDAPIPEA
                     RRVAVPGVRLCVYCQGDAELKNKHYRGAL"
     CDS             complement(47778..48008)
                     /codon_start=1
                     /product="hypothetical protein"
                     /label=hypothetical protein
                     /db_xref="SEED:fig|6666666.356844.peg.52"
                     /translation="MKNAEVKTMTVANDGALVELLKKARLDERKDQHFSFSLRLAALAV
                     RAQQRDLSVAEVVELIRQESERFEHSAQGLS"
     CDS             complement(48073..48339)
                     /codon_start=1
                     /product="Phage protein"
                     /label=Phage protein
                     /db_xref="SEED:fig|6666666.356844.peg.53"
                     /translation="MLRGKHFKTNSEKEMCRFIDDMRDKIDDDYHKNMRVLSAIFELAD
                     IDKERHHLKFNELTTDEKERLIKAMNKLRAVVSLFPKNLILPL"
     CDS             complement(48419..48694)
                     /codon_start=1
                     /product="hypothetical protein"
                     /label=hypothetical protein
                     /db_xref="SEED:fig|6666666.356844.peg.54"
                     /translation="MMKINHNPEIWLQAADDAAESFLSQPADVQENGSDNGYNRISVLS
                     SLESLADAVYYLNHPLYQFIKSHSNQWFRDGMMQAPEFAINWAKKG"
     CDS             complement(48704..48913)
                     /codon_start=1
                     /product="hypothetical protein"
                     /label=hypothetical protein
                     /db_xref="SEED:fig|6666666.356844.peg.55"
                     /translation="MTSIARLLTSQSPSPVIPNQGKGWLELPNGQRVKPSVNQVYFAPW
                     SQKPYMPAPKQKRRWFSRLMGIAA"
     CDS             complement(49172..49492)
                     /codon_start=1
                     /product="hypothetical protein"
                     /label=hypothetical protein
                     /db_xref="SEED:fig|6666666.356844.peg.56"
                     /translation="MDDSSIVESRRQIRLSEKPADLLSKEGFALYVGKTPAAIVAMAKA
                     GKLPAFYMADPLNPGGHAELWINRREWDSYAAQLVDGAPPEWHGWKDRISANKRARAKT
                     QS"
     CDS             complement(49497..49787)
                     /codon_start=1
                     /product="Cox"
                     /label=Cox
                     /db_xref="SEED:fig|6666666.356844.peg.57"
                     /translation="MGERVYEVRYPVDAVPYPKFAELIGKSEAAVKAMVDKGKLPLVPW
                     MNPEKSNPSRAENWVYIPEFNRAMREAFMNRPEEQRDAWLLWLGLRPEGGK"
     CDS             50038..50331
                     /codon_start=1
                     /product="C protein"
                     /label=C protein
                     /db_xref="SEED:fig|6666666.356844.peg.58"
                     /translation="MNMGQKIKAIRKAEGLTQLKFCEISGMALSTLKNYEGGHAEPGLQ
                     SIMLLTKSKQFEKYTLWLMTDKTAPEAGQIAPALAHIGPEETKSHQSNQNIG"
     CDS             50398..51384
                     /codon_start=1
                     /product="Phage integrase"
                     /label=Phage integrase
                     /db_xref="SEED:fig|6666666.356844.peg.59"
                     /translation="MAIKKLDDGRYEVDVRPQGAEGKRIRRKFNTKGEAQIFERHILVN
                     YHNKDWIEKPADRRKLSELLALWWVYHGKSHARGEIEHGRLKTIIATFEEMGVSQADQL
                     TKKAIMDYRVNMLNNGLKASSVNRHHAILSGMFTKLIDAEEYHCPNPFKDVKPLKESLT
                     EMAFLTASEIPELLRLLEGDELDAVLVCLATGGRWSEVANLKSEHIINNMVTFMKTKNG
                     KRRTIPISQELTNRLKRVKSGYVFRPNYRKVRNTLRAMKPDLPEGQALHVFRHTFATHF
                     MMNGGNIVTLQRILGHSTIQQTMVYAHFAPDFLQDAVTLNPLNGVSI"
     CDS             51425..52222
                     /codon_start=1
                     /product="Pyruvate formate-lyase activating enzyme (EC 
                     1.97.1.4)"
                     /EC_number="1.97.1.4"
                     /label=Pyruvate formate-lyase activating enzyme
                     /db_xref="SEED:fig|6666666.356844.peg.60"
                     /db_xref="GO:0043365"
                     /translation="MNSVTGCFSNESPADAGATKSVIGRIHSFESCGTVDGPGIRFITF
                     FQGCLMRCLYCHNRDTWDTHGGKEITVEELMKEVVTYRHFMNASGGGVTASGGEAILQA
                     EFVRDWFRACHEQGINTCLDTNGFVRRYDPVIDELLDATDLVMLDLKQLNDEIHQNLVG
                     VSNHRTLDFARYLAKRNQRTWIRYVVVPGWSDDDASAHLLGEFTQGMSNIEKIELLPYH
                     ELGKHKWTAMGEEYKLDGVKPPKADTMDRVKSILTSYGHKVVY"
     CDS             52753..53682
                     /codon_start=1
                     /product="Transcriptional regulator, LysR family"
                     /label=Transcriptional regulator, LysR family
                     /db_xref="SEED:fig|6666666.356844.peg.61"
                     /translation="MRLDKLEIRWLKLFCKIVENKGITNAQEATGLSQPVLSHYLSRLE
                     DTLGLILCERGRGGFSLTTEGELVYQEARSVIATLDDFANRLARIKHELIGEVRLGCLD
                     NIVSHPERAVPLAIRRLLELSPDASMNLYVSDHQSLMERLRNSELDVVLTVLPDDVPPD
                     IFFQPAFIEHSSFYAAAEHAGRIEQEWRDGTLNPKRLLVGGYAMNEMCKQLGSVAKQGQ
                     QSIACSEEGCMLLILAGTHVGFLPDHYASRWVLEGMLTAIAPENLRLNSIFYLVRNARQ
                     RLSPVAEVLWNNIAEIGQLSPAYRRRRL"
     CDS             complement(53705..54853)
                     /codon_start=1
                     /product="Hypothetical MFS-type transporter protein YcaD"
                     /label=Hypothetical MFS-type transporter protein YcaD
                     /db_xref="SEED:fig|6666666.356844.peg.62"
                     /translation="MSTYTRPVLLLLCGLLLLTVCLAVLNTLVPLWLNDRQLPVWQVGV
                     VGSAYFSGNLVGTLVAGRLIRYSGFNRSYYLAVLMFGGATAALALSPDIGSWILWRFVA
                     GIACALIWVVVESALLCSGNALNRGQLLAAYMMAYYLGSVVGQLLLSMVSTALFSILPW
                     LVALVLLAALPLLFARIPPPQPVTHRVNVWRMLRYRTARLGIQGCVISGIILGSLYGLM
                     PLYLAHQGMSDASVGYWMALLISAGILGQWPVGRMADRYGRLLVLRVLVFAVILGSLAI
                     LLPGRYSMASSLFLLGAAGFTLYPVAMSWACEKVAPNELVAMNQALLLSYTIGSLCGPS
                     LAAMLMQTYSDKLLFVLIAAVSLGYLIILLKKADHHPRPLAV"
     CDS             complement(54996..55904)
                     /codon_start=1
                     /product="LysR-family transcriptional regulator clustered 
                     with PA0057"
                     /label=LysR-family transcriptional regulator clustered
                     /db_xref="SEED:fig|6666666.356844.peg.63"
                     /db_xref="GO:0003700"
                     /translation="MDRITAAQVFVTITEQGSLTGAADALEMSRAMVTRYLAEMERWAE
                     ARLLHRSTRQLSLTHEGETVLQHCRELLAVSHKLDMPAKGRKEPAGLLRLTCSPSLAQA
                     TLVAAITTYLLRYPKTAVDLQVASHTLNLIEERIDLAIRITSQLDSGLIARRLGGCPSV
                     VCAAPSYLAAHGTPQRVEDLAVHNCLTYSFFGKSLWQFTRKGDTIAVPVSGSFSANDSL
                     MLLEAALNGAGVSLQPVYSVTDLIASKRLIALFPESQPQELDIYAVYHSRERMSPALRA
                     LVDFLAEWFGNNLEWKRVARR"
     CDS             56008..56883
                     /codon_start=1
                     /product="Metallo-beta-lactamase superfamily protein 
                     PA0057"
                     /label=Metallo-beta-lactamase superfamily protein PA0057
                     /db_xref="SEED:fig|6666666.356844.peg.64"
                     /translation="MLKRTLLATLLASMAFSASAALKMEVYNPGAKSLFPVSSEIITGE
                     HDALLIDAQFQRNDAENLVAKIRATGKKLKTIYISHHDPDFYFGLDVLKAAFPDAQIVA
                     TPQTIAAINATKDKKIAYWGPILKENAPKQVITPQPLNTVHLTLEGSDIDIMGLKGATP
                     DRTFVWIPSLKAVVGGVQTSANIHVWVADTQTTASRQAWLSDLDAIDKLNPTTVVPGHY
                     LPNKDGSSPWSLQNVSFTRDYLKTFEKNIPLSANSTALVKSMELAYPDLGEAASLELSA
                     KVIKGEMQWP"
     CDS             57170..57814
                     /codon_start=1
                     /product="Thioredoxin-like protein clustered with PA0057"
                     /label=Thioredoxin-like protein clustered with PA0057
                     /db_xref="SEED:fig|6666666.356844.peg.65"
                     /translation="MNRLHYIFDPLCGWCYAAAPLIHAARKIEGLPVVLHAGGMMTGPN
                     RRRITPEWRDYVQPHDRRIAQMSGQPFGDGYFNGLLWDVTATLDSEPPTTAILAAEELG
                     GRGIDLLERLQRAHYVEGLCISETSVLLKMAVEIGLPLEYFENACIHWRGLPTRKHIEE
                     SRQWLTQSGGAGFPTIVFAVDDIFTTLNIAPWLGRADDWHNYLLKLVEENQ"
ORIGIN
        1 ctggcgttac cggttgcgga tatcgccgca caggcgctga gtgaagacgg catcgcaacc
       61 atgcgacgca acgtggccga actcagtgag aatcgccgct ggctaagcga ttcgttgaaa
      121 acgctgccaa acgtggaaac ggtatacgcc agtgaaagca actatctgct ggtgcgtttc
      181 accgattcac ccgccgtctt caaatcctta tgggatcagg gcattatttt acgtgaccag
      241 aacaaacagc cgggtctggc gggttgtctg cgtatttcta tcggcacccg ctacgaatgc
      301 gagcgcgtaa tcagcgcgtt gcaggcattg tcgggcaaaa cagcataatt tgaggaagca
      361 ccgtgggatt aaagtatctt ttcatcgacc gtgacggcac gctgattgcc gagccgcccg
      421 aggattatca ggttgatcgg ctggataagc tggctttaga accggatgtt attccgtcac
      481 tgctcacctt gcaaaaagcc ggtttcaaat tggtgatgat caccaatcag gatggcctgg
      541 gtaccagcag cttcccgcag gaagatttcg atccgccgca caacctgatg atgcaaattt
      601 tcacctcaca aggtattcgc tttgagcggg tgttgatttg cccacatttc cctggcgaca
      661 actgtgactg ccggaaaccg aaaaccgcgc tggttgatgc gtttttgaaa gacaacgtga
      721 tggatagcgc caacagcttt gtgattggcg accgtgaaac cgatgttcaa ctggcgcaca
      781 acatgggcat cactggcctg cgttatcagc gcgatggcct caactggcag gcgatcaccg
      841 cccagttgac caaacgtgac cgccacgccc acgtgaaccg ggtcacccgt gaaaccgcta
      901 ttgatgtcaa cgtgtggatg gatcgcgaag gcggcagcaa gatccatacc ggtgtcggct
      961 tcttcgacca catgctggat cagattgcca cccacggcgg ttttcgcctg aatattgatg
     1021 taaaaggcga cctgtatatc gacgatcacc ataccgtgga agataccggg ttggcattag
     1081 gcgaagcact gaacaaagcg ctgggtgaca agcgcggtat tggtcgtttc gggtttgtgt
     1141 tgccgatgga tgaatgtctg gcacgctgtg cgcttgatat ctctggccgt ccgcatctgg
     1201 agtacaaggc agagtttaac taccaacgcg tcggcgacct gagtaccgaa atggtcgagc
     1261 acttcttccg ctcgttctct tacgcgatgg gctgcaccct gcatctgaaa accaaaggtc
     1321 gtaacgatca ccaccgcgtc gaaagcctgt tcaaagtctt tggccgtgcg ctacgtcagg
     1381 ctattcgggt ggagggtgat accctgccca gctccaaagg agtgctgtga tgaacgtggt
     1441 gatcctggat accggctgcg ccaacctgtc atccgtgatg tatgcggtta agcgcctggg
     1501 gtatgagccg caggtcagcc gtgagccgga agtggtattg cgcgccgata agttgtttct
     1561 gccaggggtg ggtaccgcgc aagcggcaat ggaccaactg gctgaacgcc aattgattgc
     1621 cctgattaaa gcctgtaccc aacccgtatt gggcatctgc cttggcatgc agttactggg
     1681 cagccgcagt gacgaaagcg gcggcatcga tacgctaggc attatcgata cccctgtggt
     1741 gcagatggcc gatcgtggtc tgcctttgcc gcatatgggc tggaatcagg tgacatcgca
     1801 agctggccac cgcctgttcc gcgatattcc agatggctcg tacttttatt ttgtacacag
     1861 ttacgcgatg ccggtttgcg ccaatactat tgcccaatcg cattatggcg atgccttcac
     1921 cgcagcagta cagaaggata acttctacgg tgttcagttc cacccggaac gctctggtgc
     1981 agcgggtgcc cagctactga agaattttct ggagatgtaa acggacatga ttattcccgc
     2041 attagacctg attgatggac aggtggtccg tttgcatcag ggtgattatg gtcagcagcg
     2101 tcaatacggc agcgacccgc taccacgcct gcaagactat caacagcaag gggcgcaggt
     2161 attacatctg gtagatttga ccggggccaa agacccggca gcgcgccaga tcccactgct
     2221 gaaaacactg ctggccgggg tttctgtacc ggtacaagtc ggtggcggca ttcgtaccga
     2281 acacgatgtt gaagcactgc tggcggcggg agccactcgt gtggttatcg gctcaacagc
     2341 ggtaaaacag cctgagctag tgcagcaatg gttcgcccgc tacggtgctg acgcactggt
     2401 actggcgctg gacgtgcgta ttgacgccgc gggtgtgaaa aacatcgcca tcagcggctg
     2461 gcaggagaac tccggcatca cgctggagca aacggtggaa cgttacctgc ccttcggtct
     2521 gaaacacgtg ctctgtaccg atatctcccg cgatggcaca ttgcagggct ctaacgtcga
     2581 gctgtatcgc gaaatcagtg ctcgctatcc acaggtcgct tttcaggcat ctggcggtat
     2641 cggttcactg tcagatattg ctgcgctgcg tgacagtggc gtgcgtggtg ttatcgtcgg
     2701 ccgcgccttg ctggaaggta aattcaacgt gacggaggcg atttcatgct ggcaaaacgg
     2761 ataatcccct gtctggacgt gcgtgacggc caggtcgtaa aaggcgtaca gtttcgcaat
     2821 catgagatta ttggtgatat cgtgcccctg gctcaacgct acgcacaaga aggcgcagat
     2881 gaactggtat tttatgatat caccgcgtca tccgatggcc gggtggtgga taaaagctgg
     2941 gtttctcgcg tagcggaagt gatcgatatt ccgttttgcg tcgcgggtgg catcaaaagt
     3001 gtcgaagatg ccgggcaaat tctgtctttt ggtgcggata aaatctctat caactcacca
     3061 gcactggctg acccaacgct aatttcacgt ctggctgatc gttatggcgt acaatgcatc
     3121 gttgtcggca tcgatacctg gcatgatgcc gaaaccggcc gttatcatgt caaccaatat
     3181 accggcgatg aaaagcgtac ccgcgtcacg caatgggaaa cccttgactg ggtacaggaa
     3241 gtgcagaagc gcggtgccgg tgaaattgta ctgaatatga tgaatcagga tggcgtgcgc
     3301 aatggctatg acctgacgca actgcggcag gtgcgcgatg tctgccaggt gccgttaatc
     3361 gcctccggcg gtgctggcac tatgcagcat ttccttgatg catttcagga tgccggggtg
     3421 gacggtgcat tggcagcatc ggtattccat aaacaaatta tcaatattgg tgaactcaag
     3481 cagttcctca agcaacaagg cgtggagatc cgggtgtgtt aaccgaacaa caacaaagcc
     3541 agctcgactg gcaaaaaacc gatggcatga tgcctgccat cgtacagcat gccgtttcag
     3601 gcgaagtact gatgctgggt tacatgactc aggatgcgtt gcaggttacg caagagaccg
     3661 gtcacgtcac cttctactcc cgcaccaagc agcgtttgtg gaccaaaggg gaatcctccg
     3721 gccactttct cagcgtggtt tcgatcacgc cagactgcga caacgacacg ctgttagtgc
     3781 tggtcaatcc ggtcggcccg acgtgccatc ttggcaatac cagttgcttc cacccggctg
     3841 aaactcagtg gcaattcttg taccagttgg agcagttgtt ggcagagcgt aagcacgctg
     3901 acccaaccag ctcctatacc gccagactgt atgccagcgg cactaagcgc atcgcccaga
     3961 aggttggcga ggaaggtctg gaaaccgcac tcgccgcgac agtacacgac cgcgaagaac
     4021 tgaccaacga agcctctgat ctgatctatc acctgctggt actgttacag gatcaggaac
     4081 tggatttagg aaccattatc cagcgcttga aagagcgtca tactaaataa tcttcccagc
     4141 ccgttttagc gttattaaaa cgggcttctc ctcgttactc tggcattgcc gcgtctgaca
     4201 gcatctaccc gcatttcagc caagtaccct caagctcact ttatttaccc tacccttaat
     4261 gtgcacttca caccacaagg cgatgacgac aagccctgtg ctgtgaggat tctgtttatc
     4321 tcactgactc ataagggcaa acgatgaaat ttaccaatag ccgcgttaga ccgttaagta
     4381 ttctggcgac aacagtagtg cttttctctc agccgtcaca ggccacgtca tctgaggtgg
     4441 aaaacgtcct taaacgcaac ggattggaca atacacaaat catgacgctt taccgtaacg
     4501 gtgagttaag cgtaaaagaa gatacacagc ttcacacact gacactggtc aatcaggcgg
     4561 tagtcgaaac gccacagagt acaatccgta atgccaaata ctggtatcac gccatgccac
     4621 tgtcggaata tcgcaccttt gaagccaacg gattaaccgc gttaccttgc acacagcaat
     4681 atacggattg caagctgacg ctggagcact cttataccca gaaatcgtta tccaaagata
     4741 aagccggtgt tctgattcaa ttcagtacac cgaaagaagg atggctctat gaagactttg
     4801 tcacacgcca tcattgccct gtcaaacaag aaggcggcgg cagctttatt ttaggtgaaa
     4861 aaggtaaagc tgcggttgcc agcggtgaat gcgacaagga gtatcgtggt atggggctgg
     4921 gtaacgtgtt caacaattac ctgaagcaaa agagcgtaac cccgattatc gcttatgtat
     4981 tactaccgaa ataaggcata tcaaacttat tccctgaatg aaagcaccgc cccatagtag
     5041 tcaaaaagag ccttggtatt cctcttcggg ccacatgtgc aaataacagc aacagactgt
     5101 tttattagat aaaaaaatag cccccaatta attgggggct atctatcaaa caggcgttat
     5161 gactgactaa tcagccataa atgttagcgc gatcgcgcaa ttccttaccc ggtttgaagt
     5221 ggggaacata tttgccttcc agttccactt tctcacccgt tttcggatta cgccccacac
     5281 gcggtgcacg gtagtggagt gaaaaactgc caaacccacg gatttcgatg cgatcaccgc
     5341 tggccagcgt tgtggccatc tgttccagca tctccttcac ggcatcctca accaccttgg
     5401 ccgggatatg agattgctgt ccagcaagtc tttcgataag ttcagacttg gtcatgattc
     5461 ctccaagcat gtggtcagta aatgccacgt taacttacta ccgtttgagg tcaggcagca
     5521 agtacgctgc ccaacccacc gtcattactc gccttttgca gctttgaacg cttcagccat
     5581 ggcgttagag aagttacctt cttcctgttt gttgttaaca gaagcgatgg catctttctc
     5641 gtcagcttca tccttagcac ggatggacag gctaacaacg cggtttttac gatcaacgcc
     5701 agtgtatttg gcttcgatct catcaccgac gttcagaacc agggtagcgt cttcgatacg
     5761 gtcacgagag gcttcagaag cacgcaggta accttcaacg ccgtcagcta attcaactgt
     5821 agcacctttg gcatcaactg cagtgacttt acctgtaaca atcgcacctt tcttgttaac
     5881 agacaggtag ttgttgaacg ggtcttcagc cagttgtttc acgcccaggg agatacgctc
     5941 acgctctgca tcaacctgca gaacaacagc ggcgatttcg tcacctttct tgtattcgcg
     6001 aacggcttct tcgccagcca cgttccagga aatgtcagac aggtgcacca gaccatcgat
     6061 gccgccatcc agaccgatga agataccgaa atcagtgatg gacttgatct tgccttctac
     6121 gcggtcaccc ttgttgtggg tttcagcgaa ctgctgccac gggttggctt tgcactgttt
     6181 caggcccaga gagatacgac gacgttcttc gtcgatatcc agaaccataa cttccactac
     6241 gtcgcccacg ttaaccactt tggacggatg gatgttcttg ttggtccaat ccatttcgga
     6301 tacatgtacc agaccttcaa cgccttcttc gatttctacg aagcagccgt aatcagtcag
     6361 gttagttaca cgaccggtca gcttggtgcc ttccggataa cgtttagcga tagctaccca
     6421 cggatcttcg cccagctgtt tcaggcccag agaaacacgg gtacgttcgc ggtcgaactt
     6481 cagcacttta acagtgattt cgtcgccaac attgacgatt tcgctcgggt gcttaacgcg
     6541 tttccacgcc atgtcggtga tgtgcagcag gccgtcaacg ccgcccagat caacgaatgc
     6601 gccgtagtca gtgaggttct taacgatacc tttgacttcc atgccttcct gcaggttttc
     6661 cagcagttga tcacgctcag cactgttttc agattcgata acagcacgac gggaaacgac
     6721 gacgttattg cgtttctggt ccagcttgat cactttgaac tcaagctctt tgccttccag
     6781 atgcagggtg tcacgtaccg gacgaacatc aaccagagaa cctggcagga acgcacgaat
     6841 accgttcagc tcgacggtga aaccaccttt tactttaccg ttgataacac cggtaacagt
     6901 ggcagattct tcgtaagctt tttccagcat cagccatgct tcgtgacgtt tagctttttc
     6961 acgggacagc agggtttcac cgaagccgtc ttctaccgca tccagagcta cgtcaacttc
     7021 atcaccaacc tggatttcaa tttcaccctg ggcgttttta aactgttcta ccggaatggc
     7081 agattcagat ttcaggccgg catcaaccag gactacgtcc ttgtcaatag caaccacaac
     7141 gccacgaacg atggaacccg ggcgggtttc gatttctttc agggattctt caaagagttg
     7201 agcaaaagat tcagtcatgt tgataatctt tgggttttca aatttaacgt ccacctgaca
     7261 tcctgcccga tggggttgtt tcacatcccc gaggcatcct tgcggcgggg gaagaaatat
     7321 atcaggccaa ttgcggcaat acctgacgaa catacgccag agcctgcttg accacttcgt
     7381 ccaacgtcat gtgcgtggaa tcgagaacca gtgcatccgg tgctggcacc agtggtgcaa
     7441 ccgaacggtt acgatcgcga tcatcacgct ctttaatctc ggacaaaaga cgttcaaagt
     7501 taacattaaa gcctttcgcc tgcaactgga gcatgcgacg tttcgcgcgt tcctctgcac
     7561 tggcatccag aaatatcttc accggggcat caggaaaaac caccgttccc atgtcgcggc
     7621 catcggcaat cagccctggc gcatcgcgaa acgcacgctg gcggcgcaat aacgcttcac
     7681 gcacccgtgg gaacactgct gcctgagacg cggtattgcc aacctcctga gtgcggattt
     7741 cattgctgac atcttcgcct tcaagaatca ctttgagttg cccatcttcc ggcacaaact
     7801 gcacatccag gtgcgatgct atcggcacta acgcctcttc agacgtgata tcaacctgat
     7861 ggtgtaacgc cgccaacgcc agcacgcgat aaatcgcacc ggaatccagc agattccatt
     7921 gcagtgcatt agccagcgct ttacacaagg tccccttgcc tgcgccaccg ggcccgtcga
     7981 ccgtaattac cggtgcagtc accgccattt ctcactcctt taaaaccggg aaatcgcctg
     8041 tcattgcaga caacattcat acagataata catgtcgcca ttataccttg ctgtggcagc
     8101 aagcgtgaga ttaaaggctt attactgcag aaaatcggga aaatattgtg atccccagag
     8161 tataacgcta aataataacg cacagagttc tactgacaga tcagtccagc cactccgtgc
     8221 gttaacgcgt tagccgtgct ggctcagacg ttccagttgc tggaaataat ccgggaacgt
     8281 tttggcagta catttagggt caaggatagt gacaggcgta tctgataacg ccaccagaga
     8341 gaaacacatc gccatacggt ggtcattata ggtcccgatt tctgcggctt ttagctgctt
     8401 cggcggcgta atacgaatgt aatcatgccc ttcttccact tcagcaccga ctttacgcag
     8461 ttctgtcgcc atcgcagcca gacgatcggt ttctttaacg cgccagttgt agatattacg
     8521 cagcgtcgtc gttcccccct cagcgaacaa cgcggcggta gcaatggtca tcgccgcatc
     8581 aggaatatgg ttcatgtcca tatcaatcgc atgcaactca ccacgctgac attcaatata
     8641 gtcatctccc caacgaacct gcgcgcccat tttctccagc acatcagcaa aacggatatc
     8701 cccttgcacg ctgttgcgac caacgccagt cacacgcacc gttccgcccc gaatagcggc
     8761 agcggccagg aaataggaag ccgacgaggc atcgccttct accagataat gcccaggtga
     8821 ctgataatgc tgattaccgg caaccacaaa agtctggtaa ttattattgg taaccgtaat
     8881 accgaaggtt tgcatcatat gcagggtaat gtcgatataa ggcttggaaa ccagatcacc
     8941 cttgatagtg atctgcgtat cctgtgctgc cagcggtgca gtcatcagca gtgcggtcag
     9001 aaactggctt gatacagaac catctacgct aatttcgccg ccctgaaagc ccccacgcaa
     9061 acgcaatggc gggtagtttt cctgctccag ataatcgata cgcgcgccac cctggcgtaa
     9121 cgcatccacc aaatggccga ttggtcgctc tttcatgcgc ggctcaccag tcagcacaat
     9181 atcgccctct gtcaggcata gcgctgccgc cagtggacgc atcgccgttc cggcatttcc
     9241 caaaaacaac tccagtggtg cagacgcagt gaacgcaccg cccagtccca caatgtcaca
     9301 ctccgtacga ctggcagaca aatgatattc aacgcccaga gcactcaggg cgttgagcat
     9361 atggcgcaca tcatcgctat ccagcagatt agtcagccgc gttgtccctt tcgccaacgc
     9421 cgctaacagc aaggcgcggt tagacacact tttagaaccc ggcaaattaa tggtgccgtc
     9481 aattaatgag atcggttgta gggtcaggga ttcctgcatg tggaacatgt tctccaaaag
     9541 tttacataaa aaccccggcc agataaccgg ggttttaaat aaaaaacagc acgctaatgc
     9601 gctctattta ttacgtttta tcacgtgatc agccgtgacg gcgctcgaag tctgccatga
     9661 actccgtcag tgcttttaca ccactcagcg gcatagcatt atagatagat gcacgcatcc
     9721 cgcccacaac acgatggcct ttcagcgcat gcaacccggc agcctgagct tcctgcagga
     9781 ataccggatc caacgcggca tcggccaact ggaatggcac gttcatacgc gaacggctgc
     9841 ctgggacaac atcattacga taaaaatcgc tgccatcaat ggcggagtac agcagatcgg
     9901 ccttcgcctg attgcgtttt tccatctcca acaggccacc ctgctctttc agccacttga
     9961 acaccatgcc ggacagatac caggcaaatg tcggcggcgt gttaaacatg gagtcgttat
    10021 cagccagaat tttgtaatcc agaatcgacg gcaattcacg gcgagccttg ccgagcaggt
    10081 catcccgcac aatcaccagc gtcaggccag ctggccctac gtttttctgt gcaccggcat
    10141 aaatgacgcc gtaacggctc acatccagcg gacgcgacaa aatactggaa gagtagtccg
    10201 ccaccacaat tttatcgccg aaatccggct cttcttcgat tgccagaccg tcgatggttt
    10261 cattcgggca gtaatgtaca taagcggcgt catctgacag cacccactca ctcatcggct
    10321 tcacaccacg cagaccatca gcgctggttt tcacatcaat aacggtcggt gtgagatatt
    10381 tctcagcttc tttaaccgcg ctgtgcgccc agtacccgcc atcaatataa tccgcgtggg
    10441 ttttctcccc cagcagattg agcggaaccg ccgcaaactg ggcacgggca ccaccatgac
    10501 agaacaatac cttgtaattc gaggggattt tcagcaaatc acgcaaatcc tgttcagatt
    10561 cgctggccac ctgcatgaat tctttgctgc ggtggctgat ttccatcacc gaggtaccca
    10621 acccgtgcca gttgcacagt tcttgttctg ctcgacgtaa tacttctacc ggtaacatgg
    10681 ccggaccagc actaaaatta aaaacctgag tcatttccct tcaccacata tcaatagcga
    10741 cctgtctacg tcgcatcagt ttaccttgct atcggtttta tcattcgtct ttcttgcctg
    10801 caacgcttat tgccctgatg gcggaaaact tgcgtactcc cccgcctgtt acggtttcgg
    10861 ttacccctct gttgcattgt catcgggaag cgccgcgcaa tacacaacat gcgggataga
    10921 gtcagtacac aaaaccacgt atgatgcagc ctcctcatca cacattcagg ttcgaaccat
    10981 gacccaaacg tttatcccag gcaaagacgc cgccctggaa gattccatcg cccgttttca
    11041 acaacaactc ctcgacctgg ggtttaacat cgaagaagcc tcttggctga acccggtgcc
    11101 caacgtctgg tcggtacata tccgcgaccg cgactgcgca ctgtgtttca ccaatggtaa
    11161 aggcgcgacc cgcaaagcgg cgctggcttc cgcattgggt gagtacttcg aacgtctgtc
    11221 cactaactac ttttttgccg acttctatct gggacaacac atcgccgaag gtgacttcgt
    11281 gcattaccct gacgagaagt ggttcccgct tcctgaagat gacagcctgc cggaaggcat
    11341 tctggatgct cgtttgcatg ctttctacga tccggagcag caactggtcg ccagcgatct
    11401 tatcgatctg caatctggca accacgatcg cggtatctgc gccctgccgt ttacccgcca
    11461 gtctgaccag cagacggttt acatcccgat gaacatcatc ggtaatttgt acgtgtcgaa
    11521 cggcatgtcg gcagggaata cccgcaatga agcgcgtgtt caggggctgt cagaagtatt
    11581 cgaacgttat gtgaaaaacc ggattatcgc cgagtccatc agcctgccgt cgatcccggc
    11641 ggaggtgtta tcacgttatc caggcgtggt ggaagccatt gccacactgg agcaagaagg
    11701 ctttccaata tttgcctatg atgcttcgct cggtggtcag tacccggtta tctgtgtcgt
    11761 gctgttcaac ccggctaatg gcacctgttt tgcatcgttc ggcgcacatc cagattttgg
    11821 cgtagcgctt gagagaacgg tgaccgaatt gcttcagggc cgtggactga aagatctgga
    11881 cgtgttcaca ccgccgacat tcgataatga ggaagttgcc gaacacacca atctggaaac
    11941 ccattttatc gattccagcg gtcttatctc ctgggatttg tttaaaaccc agtcagatta
    12001 tgacttcgcc gattggaatt tcagcggcac taccgagcaa gaattcgcga cactgatggc
    12061 catcttcaat aaggaagata aagaagttta catcgcggat tatgagcatc tctcagtgta
    12121 tgcctgccgt attctggtgc cgggcatgtc cgatatctat ccggcagaag acctgctgtt
    12181 ggcaaacaac agtatgggag cgcatctgcg cgaaacactg ctgtccctgc cggatagcca
    12241 gtgggaaaaa gaagactatc tggcattgtt acagcaactg gacgatgaag gcctggatga
    12301 ttttacccga gtgcgcgaat tgctggggat agcaaccggt aaagataacg gctggttcac
    12361 attgcgtatt ggcgagctga aatccatgct ggcactggca ggcggcgatc tggagcaagc
    12421 actaagctgg gccgaatggt cactggattt caaccagtca gtcttctctg cagagcgcgg
    12481 taattattac cgttgcctgc aaacactgct gcaactggcg ctggagcctg aacgcgaccc
    12541 tgctcagtac tacgatgcct ttgtccgtat gtacggccag gatgccgtcg atgccgccag
    12601 cgcagcgatt gccggtgagc aatgcttcta tggcttattc accgttgatg ccgatttgaa
    12661 agcactgccc gctcatcagt ccctgctggc agcctatgga aaattgcagc gcgctaagcg
    12721 tgcacactgg caggtgaagt aagcgttatc tcagcagacc ggatgacgct atcgttatcc
    12781 ggctgctgtt ttatccggtt actgtttgcg acacagacca ctgcgtatca acagactctg
    12841 cgtttacacc cacaagttga cttgcaaaac aacgctctca catgttgaac aacatcacga
    12901 actggtatgc aaatcgaagc ctattgacca ggcaagtaag cgcgccaaca ccgttgcaac
    12961 gtgcgcaatg acagggatat gacctatttt tataccggtt ctctgccctg cagatctttc
    13021 gtcgcccaat acaccgatta accacatatt ttttatggtt aatttaaagt acaccgagat
    13081 gacttttata aattcgttat tgttatcgaa tggtaaatgg caaattaaat aatataaact
    13141 tgaaatatga tatcactaca aagacttatt ttatttaacg tcatacaggc taatttcaac
    13201 ccattattca actgttttga taatttttaa aaaaaatttt ccacataaaa aacaatagga
    13261 tatgcattaa atcaccccaa aacctcctcc tgatcagcct aataaattcc agcggtatga
    13321 tccacgtcaa attatggcga ataacccttt gttagtatct caccgtagat aatttttaag
    13381 agagagttag tgtgaaagct gacaacccct tcaccttgtt attaccacca gcgatggcga
    13441 aagtcgcaga agatgccggt gtgtataaag caacaaaaca accgcttact acgtttttcc
    13501 tggcgatcac tgctggcgta tttatttcaa tcgcattcgt tttttatatc accgcgacca
    13561 ccggttcctc gtccatgccg tatggaatgg ctaaactggt tgggggtatc tgcttctccc
    13621 tgggattgat gctggtggtt gtctgcggtg ctgatttatt cacatcgaca gtgctgattg
    13681 ttatcgctaa agccagcggg cgtattacct ggaaacagct aggattaaac tggctcaatg
    13741 tctatgtcgg caacctgatt ggcgcgttgt ttttcgttgc gttgatgtgg ttttccggcg
    13801 agcacacggt ggcaaatggc gcctggggcc tgaatgtact gcaaacggct aatcacaaac
    13861 tggaacatac gttcgttgaa gcgttatgtc ttgggatact ggcaaacctg atggtctgcc
    13921 tggctgtttg gatgagctat tctggccgta cgctgactga caaaatgctg gcaatgattc
    13981 tgcctgtcgc gatgttcgtc gccagcggtt tcgagcatag tatcgccaac atgttcatga
    14041 tcccgatggg gattgtggtt aagaatttcg ctccagaaac tttctggcac gccatcagca
    14101 tgacgccggg ccagtttgaa cacttgacca tcagcaactt tattgtcgat aacctgattc
    14161 ctgtcacgat cggcaacatt attggtggtg gactgctggt aggcttgacc tattgggtca
    14221 tttatttgcg cggtggggat cagcactaag ctgctgtcgg ccgcaacgtc gggttataaa
    14281 aatccaaatc aaaggtaggt gtaatatgac cgaacttaat cagaaactcg cccaggcttg
    14341 ggaaggtttt agcaaaggcg aatggcagaa tggcgtcaac gtacgtgact tcattcagaa
    14401 aaactacgcg ccgtatgaag gtgacgaatc ctttttggcc ggtgctaccc cggcaacgac
    14461 taaactgtgg gatgccgtta tggaaggcat caaacaggaa aaccgcaccc atgcgccggt
    14521 tgatttcgat accgacgttg ctgccaccat cacctctcac gatgctggct atatcaataa
    14581 aggcctggaa aaaatcgtcg gtctgcaaac agacgctccg ctgaaacgtg cactgattcc
    14641 gttcggcggt atcaaaatgg ttgaaggctc ctgtaaggtt tatggccgtg aactggaccc
    14701 gcagctgaaa aaaatcttca ccgaataccg taaaacccac aaccagggtg tattcgatgt
    14761 ttatacgccg gatatcctgc gctgccgtaa gtctggcgta ttgactggtc tgcctgatgc
    14821 ttatggccgt ggtcgtatca tcggtgacta ccgtcgtgtt gctctgtacg gtatcgacta
    14881 tctgatggcg gacaaattcg ctcagttcac ttccctgcag tccaaactgg aaaacggcga
    14941 agatctggaa gcgactatcc gtctgcgtga agaaattgcc gaccagcacc acgctctgtc
    15001 acaaatcaaa gagatggcgg cgaagtatgg ctgcgatatc gctggcccgg caaccaacgc
    15061 caaagaagcg gttcagtgga cttacttcgg ctatctggct gcggtgaaat ctcagaacgg
    15121 cgcggcgatg tcctttggtc gtgtgtctac gttcctggat gtctacatcg agcgcgatct
    15181 gaaagcaggc aaaatcaccg agcaagacgc tcaggaattg atcgaccacc tggtgatgaa
    15241 actgcgtatg gtgcgtttcc tgcgtacccc tgaatacgat gaactgttct ccggtgaccc
    15301 gatttgggca acggaatctc tggctggtat gggtctggat ggccgtacgc tggttaccaa
    15361 aaacagcttc cgtttcctga acaccctgta caccatgggg ccgtctccgg aaccgaacat
    15421 gaccatcctg tggtctgaaa aactgccgct gaacttcaag aaattcgccg ctaaagtgtc
    15481 tatcgatacc tcttctctgc agtacgagaa cgatgacctg atgcgtccgg acttcaacaa
    15541 cgacgattat gctatcgctt gctgtgtaag cccgatggtt gtcggtaaac aaatgcagtt
    15601 cttcggtgcc cgcgctaacc tagcgaaaac catgctgtac gcaatcaacg gcggtgtgga
    15661 cgaaaaactg aaaatgcagg ttggtccgaa atccgaaccg atcaaaggcg atgtactgaa
    15721 ctttgacgaa gtgatggaac gtatggatca cttcatggac tggctggcta aacagtacgt
    15781 caccgcgctg aacatcatcc actacatgca cgacaaatac agctacgaag catcgctgat
    15841 ggctctgcat gaccgagacg tgttccgtac tatggcatgt ggtatcgcag gtctgtctgt
    15901 tgcagctgac tccctgtctg ccatcaaata tgccaaagtc aaaccggttc gtgacgaaag
    15961 tggtctggct gtagacttta acatcgaagg tgaatacccg cagtttggta acaacgaccc
    16021 gcgtgtcgat gacctggctt gtgacctggt tgaacgtttc atgaagaaaa ttcagaaact
    16081 gaatacctac cgtggtgcta ccccgactca gtccgtactg accatcacct ccaacgtggt
    16141 atacggtaag aaaaccggta acaccccgga tggtcgtcgc gctggtgcac cgttcggacc
    16201 gggtgccaac ccgatgcacg gtcgtgacca gaaaggtgcc gttgcctctc tgacctccgt
    16261 cgctaaactg ccgttcgcct acgcaaaaga tggtatctct tataccttct ctatcgtgcc
    16321 gaacgcactg ggtaaagacg atgacgtgcg taaaaccaac ctggctggtt tgatggatgg
    16381 ttacttccac cacgaagcgt ctatcgaagg tggtcaacac ctgaacgtca atgtaatgaa
    16441 ccgcgaaatg ctgctcgacg cgatggaaaa cccggaaaaa tatccgcagt tgaccatccg
    16501 tgtatcaggt tacgccgttc gctttaactc gctgaccaaa gaacagcagc aagacgttat
    16561 tacccgtact ttcactcagt ccatgtaatt acatgtctgt ctgaaaggcg taaactaaag
    16621 gctccacatc ggtggggcct ttttataacg ggtatccagt ccgttttctt tgtgggccgc
    16681 ttagcggcgc taaagatttc ttccggaaat tttttcacca ctcctgccga aataaatcag
    16741 aacctgtttt gtcagcctgc tctcatcggc tggcaggctg acaaaacaga ttcgacgccg
    16801 aacaccgtgg tgtagccctc cgtgctaccc tgttgttact gcgctcattg caggccgtta
    16861 tttcccggcc caacctggag aaacctcgca tgtcagttat tggtgacttg aagtaatcac
    16921 taatcaattg aaataaaagg atttatttct ttcggtgtcc acgtattgac cacatcgaca
    16981 acaagccccg tttcacgggg cttgttgtta taagtattgc cccctatctt taaccactct
    17041 gtgcaaccaa tgcacagagc agaaataaaa ggattaataa atcaggagat acctcatgaa
    17101 aaagtgcaca tgcgcactgt tgttattagc ttcattctgc gcttctgccc agtcaataaa
    17161 tcactcagtc ctgcaaaaat cgctcaagcc gtggcaccca ataatctttt cggaaaatgg
    17221 tggtgtcatc cggctaacaa tgaatgaaga ccgtgtaagc aatgagatct atgaatcggt
    17281 catattaatg ggggtatgca ccccgctatg gtttgaggca aagaaaactg catatctcaa
    17341 caaaataaaa gagatacatg tattaaaccg aaatagccgc tctgggttta tttttgaaag
    17401 cccgaaatct tcttgtgaag aagttggcaa agcaaaaggt gacggaggta agatcgttat
    17461 cgctgcccat acacacagca agtaaaataa cttttcaaag ccccgcaatc atcctgcggg
    17521 gcttctgttt tatagcgcca tattcaactg ctcccaccca taacgcgatg cggggaaaac
    17581 gtcttcggaa taaattcaga cggtgacggg gtttcctatg attgcagttg atgatttatt
    17641 tcaatgaaat atatagcatt cgaatcaata aaatcccatc acaccactac aaagcgattg
    17701 tttacatatg gcttctttgt aattaatact tacctgccat ctggcacgat tattacgaaa
    17761 taaggagaac actgtgtata aatataaaat ggttcaaatt ccaccgaata ttattgtcaa
    17821 cgctagaaaa gtcgataaag acaatgccgc cgcacattat ctggagcagg tcgtaaacga
    17881 aaaggctgaa gacggatggg agtttcagcg gattgacacc attggcgttg aagaacaacc
    17941 cggctgtgcc tcactccttt ttggcaaaaa aaacgggccc gttaattact atgtaatcac
    18001 atttcgcaaa gaggcatagc atgttggcct ggctgagtat aaagatgatt gggctttatc
    18061 gtagtcttgc gcctgattcc attaggggga gatgcagata taagccgaca tgctcagcgt
    18121 acgctatttc tgtgattaga cgtcatggct tcttaaaagg gtggaaactg gcgttagaga
    18181 ggatcagtag gtgtaggccg ccttacgagg gccgggattt accgccctta taatctctaa
    18241 tagccaaaag ccccgcactc atcctgcggg gctttggttt tacaacgcca gattcaactg
    18301 atcccgtccg taatgcgatg ccggaaaggc gtcttgcggg ataaagtcag gcggtagcgg
    18361 gtcttcccgt gtacgctttg atacgcgccg ttctaccgtg ttgagggtgg taaatgtctc
    18421 gctacattcc aggttttggc actggtgata ctgccggatg gtgatatcgc tcaggcggcg
    18481 actggtacgg gtgcgggcca ttgccccgca aaaaggacat ctgaacataa tggctcccct
    18541 gtgggagttg aactcgccgc cattttattc actttctgct atccagtcag ggatttttgc
    18601 ttccagttcc agacgggtgg taaagccgtt gccatcaata acgtgttccg cgcgagcgat
    18661 gatccagtct tggttgtcga tatccggttt aaagccgctt accgtcaggt gcatttcggg
    18721 atacagctca gcacggccac gcgccagggt aatcgaaaat tcagcggccc cgcgttgcaa
    18781 ctgtcgccat ttagctgccg ccgcccgtct ggcgacctct tcattctggt aggttttacg
    18841 cagcacgaac acgttgcctt ctgcgccggt gatgtaatcg ccttcacggc tgctgctttt
    18901 ctcctttttc ggttttggct ttgtccggcg gcgttttacg ctgaccttct tctttttacc
    18961 gaatttcaga tccagccagt aggcgcgcac accggtgtag gcatcccgat ccgcaatgcg
    19021 aaaacggtgg ccgtcaccac tgctgcgggt gatactggcc gacggcagcg ccttgccgga
    19081 tgccgtcaca ccaccgccgg gcagaataaa cagcaaggtg ccgtttttga tggtggcaat
    19141 ggcccccagt tgctcggcca tccgggtcag gaatgacata tcactctctt ccgtctggtc
    19201 tgcgtggtcg atttcgatat tcatcagcat gtcgctgatt tgcgccttca tgccgtagcg
    19261 gtgcgcaatc gccgacacga cacgctctac cgtcacgtca tgccaggaaa cctcccgttt
    19321 cacgttgaac tcttcgcgga aatccgcact tctggccgta acacccagca catcgggcgg
    19381 gccttcgtgg gaaatctcat ccacggtata cagtcctttg taagtcagcg cctcaccctg
    19441 ccagccgatg gacagtgcaa tctgagcgcc acgcggcggc agctccacgc gtccgtcgct
    19501 gtcgtctatc gacagcgtga gctggtcagc ctcaaagccc cggttgtcgg tcagcgacaa
    19561 cgagatcagc cggtcgctca gttccttcag tgatttccca cccagcgtaa tgctgaaggc
    19621 cgggcttttt accgcctcgg tcagcgcatc atcgtagcgt ttcgccgtag tgataagtga
    19681 gtcagccaga tcggtgatag ccatcgtttc cccctgtttt cgcgcatgat ttcacgcgca
    19741 cgcgtgggga aaaatggctt tttgttgtcg ccggacggcc agacctgtca gcgcgtgagt
    19801 gtgcggctga tatcggggat tatcgccatg aactcaataa cgtaatggtg gcgaacatgt
    19861 ccgagacacg tttccacggt gtgcgcgttc gtgaaaatac cgacctggta accgcaatca
    19921 atgacattga ttccagtgtg attggcgtgg tggccgtggc ggaagatgcg gacgcagaca
    19981 cctttcccct gaatacgccg gtgctcatca cacgggtgaa tagcgtgctg ggcaaagcgg
    20041 gtaaaaccgg ctcgctctac aagacgctga aagcaatttc tgaccagacc agcccgaaag
    20101 tgatcgtggt acgggtggca gcagcaaccg aaggcggcga caaaacccaa tcccaactga
    20161 ttatcggcgg gacggcggcg gacggcagtt acaccggcat gtacgccttg ctgacagcag
    20221 aagccaaggt taactaccgg ccgcgcattc tggcggtacc tgactatgac accgccgaag
    20281 tgacgtcagc gctgtgtgtg atcgcgcaaa acctgcgggc gtttgtctat gccggttgtc
    20341 acggctgcac cacgatggcg gaggctatca cctaccgtgc gcagtttgcg tatcgtgaac
    20401 tgatgctgat ctggccggat tttatcgctt ataacccgct gaccggcagc aatgaaacct
    20461 ttccggcgtc agcctatgcc tgcggcctgc gcgcagcgat tgataacgat cagggctggc
    20521 ataagtcgct gtcaaacgtg gcagtgaata acgtgctggg tatctcgcgg gatgtgttct
    20581 ggtcgcttca ggccgaagac agcgacgcca atgaactcaa caaccaggag atcaccacgc
    20641 tgattaagcg caacgggttt cgcttctggg gcaaccgcac caccgatacc catgattacc
    20701 tgtttgaggt gtacacccgt accgcgcaaa tcctggctga cagtatcgcg gaagcgcagt
    20761 ttgaagccgt tgacgagcca ctgaccccgg ccaacgtgaa agacgtggtg aacggcatca
    20821 acggcaagct gagcgcgctg gtcacagcgg gcaggctgat cggcggggaa tgctggttcg
    20881 atattcagga caaccccaca accggcctgc gacagggaca ggtgcgcgtg cgttacaagt
    20941 acacgccggt gccgccgctg gaagacctga cgttatacca gaccttcacc gatgactatt
    21001 ttgactccgc tttctcgtca ctgggaggtg tgtaaatggc cgtaccgcat aaattgcgcc
    21061 tgttcacctg ttttgtgaac ggcaacaacc agatcggcaa ggtcacgtcc gtcacgctgc
    21121 caaagctgac ccgcaagact gaagactttc agggcgcggg catgattggc tcggtagcgg
    21181 tcgatctcgg tatggattcc ggcgcgctgg aagcgcagat ggttgtcggc ggcatggaga
    21241 aaaagttgct gctggaatac ggcggcgata tcgatgacgt tcgcctgcgc ttcgcggggg
    21301 aatactacac cgacggcgat agccagcttg tcgaggtgga aatgcgcggg cgtattaccg
    21361 agattgacgg cggcgaatcc aagcagggcg aagacacatc cgtcacctat gcgctgaaaa
    21421 acacctatta caagctgtcg attgacgatc aatcggtgct ggaaattgac ctgctgaatt
    21481 tcatctacaa gaaaaacggc aaaaacatct acccggatcg catcacgtct gcgctggggc
    21541 tgggtaactg aacaacctga atcatggcgg ccacaagccg cctggagcct gtcaccatga
    21601 acacaccgaa tgaacacacc gtaaccctgg cgacgcctat cgtgcggggc gataacgcca
    21661 tcagccaggt gagcatcacc gacgatatca aacaggctgg ctcactgcgc ggcctgcggc
    21721 tggtcaacgt cctgaatatg gatgtggatt ccatcaccac cctgttaacg cgtgttacct
    21781 cgccaaagct gaagctggcc gagattaacg cgatggatac ccgcgatttc atgcgactgg
    21841 cggaggccat cacgcctttt ttagtgcatg cggagcctgg cgaaccgaac gcggaggcga
    21901 cggaggaagc gtaaccgtct tgcagttcga ccagatagac gatctggtcg ctgatattgc
    21961 cgttgttttt aactggccgc cctctgaact gttcagcatg gatctgggcg acgtgatagc
    22021 ctggcgcgcg cgggcggcta tccgaagtgg agccagtgaa gccgatgaaa agccttgata
    22081 tccgcgtagc cttcagtgct atcgaccggc tgacccgccc ggtcaacgcc gcccgccaga
    22141 gtgcgggcgg tttgtctgaa tccctcaaac gcacccaggc cgctattaag gatctggata
    22201 atcagtccag gaccttcaat cgcctgcgcg acagcgtaca aaagacctca cgcaagattg
    22261 atgaagccag ccgtagtctg gacgggctga aaaaggccca gcaaaacaat accgtgctga
    22321 ccgataagca acgggaacac atggccgcac tggccgccaa actggagcgg ctgaacatca
    22381 cccgcgatca ggaaatggtg aaactacgcg ccgtatcgca ggcgctacgt ggtcacggtg
    22441 tgtcgcttgt cggcagtaac gccactatcc agagcgccat ccggcgcacc gaacaatata
    22501 accagacact ggagcgagag cggcggcaac tggccgcggt tacgcaggca cgcgcccgtt
    22561 atgaacgcat gcaacagacg gcaggcaaac tgcgcggcag cggcgtgatg gccgtggcag
    22621 gcggtgcggc agccggatac gcgggcgggc agtttctggc tccagcggtc gggtttgatg
    22681 aagagatgtc tcgcgttcag gcgctgaccc gtctggataa aggcgatcag caactggcag
    22741 ccctgcgggc gcaggccaaa aaactcggtg cggaaaccgc attcaccacc cgcgatgcgg
    22801 ccagcgggca ggcgtttctg gcgatggccg ggtttactcc gcaggccatt caggcggcat
    22861 tgccgggcgt gttgaatatg gcgctggccg gtggcatgga actgggcgaa accgccgata
    22921 tcgggtcaaa cattctttca cagttcaatc tggatgccag ccagatggat cgcgtcagtg
    22981 acgtgctgac cggcgcgttt actcgcacca acaccgacct gttcagcctc ggcgaaacca
    23041 tgaaatacac cggcccggtg gcggccaagc tggggatcag cctggaagat gcggccgcga
    23101 tggccggtat gctggcaaat aacggtattc gcggcagtga tgccggtacc gccatgcgtg
    23161 ccagcctggc ccgtctggct tcaccaccga aagcggcagc ggaggcgtta aaagagctgg
    23221 gcgtgtcggt agctgacgcc aaaggcaaga tgcggccaat gcaagacgta ttacgtgatc
    23281 tgtacaaggc gacccaaaaa tacggccagg tcgatcaggt gtctttcttc aaagatattg
    23341 ccggtgaaga ggcctttgtc ggtctgcaaa cgctggtaca ggcggccggt agcggtgcat
    23401 tgggtaaact gtctggtgaa ctgaagaaag ccaaaggtga agcggatgcc gtcgccaaaa
    23461 agatggcgga taacctgggc ggtgacctga aaaacctcga cagtgcctgg gaagggtttc
    23521 gtattcaggt tgaagagaca acagaccggc cactgcgcag cctgacgcag gggttaagtg
    23581 acgtgattac caacgtgagc ggctgggtga gggagaatcc caggctgacg caaacactgt
    23641 tactggctgt cggcggtgcg gcggcattcg cggtggcgat cggtagcacc tcactggcaa
    23701 tcggcttgct gatggggcca ctggctaagc tccagctcgg cttttctcta ctgctgggcg
    23761 cacggggcat cggtggcgcg gtgtcgatgt tttccgggtt aagtagcctg ctcagcgggc
    23821 cgatggcacg catgggcggc tggctacaac ttttctcagg cagcgcgggc cgactgaccg
    23881 cgacactgac cccgctgcgt ggcatgttac tggccgtgtt tacctcgccg gtgtcagcat
    23941 tagggtcact ggtcaggggc gttggcgggc tgttattgcg gctgagcggt ttgcctgtgc
    24001 tgtggagcct gatcaccggt gctgtctcgg tgttaggtgg cgtgctgtca ttgctgttaa
    24061 gcccgatcgg attgattggc gcggcgtttg tggcggctgg gctgcttatc tggcgattct
    24121 gggagcctat cagaacgttt ttcagcggga tgtttaccgg cattgttatc agccttggcc
    24181 ccattcggca ggcatttacg agcctgtctc ccgtctttga tgtgattgtg tcggccgtat
    24241 cgcgcctgtg ggatcgattt acgcagcttt ttcagcctat ccagaccaca aaaaagacgc
    24301 tggatgactg tgcaattgca ggctatgggt tcggcaaggt gctggggtcg gcgctggaca
    24361 tgctgttatt gccgctgcaa aaactgatgg aggggatcgg ctggattctg gaaaagctcg
    24421 gtttaatccc gtccggactg gatgcggcgc agaaaaaagc cgatcagttg aaagagctga
    24481 cgccggaagg gaaagaccgg ctgcaaggtc tggtcgccaa cctgaccggc gacctgaaag
    24541 gggccaccac cgcaccgcca cccgcatcta agccacccct gaccggggac agcggcaccc
    24601 agcgccgttt gcagaagatt gccgacaaca ctggcggcgt gctggaagaa accaaaaagc
    24661 gcatcggccc cggtgatatc gttttcaaaa acctgccgaa agcgctggct gtgcgtggcg
    24721 aatggcagga atcccggctt actggcagca caccttctgc cccctcacag cctgcgcaga
    24781 ccatgcaggc gctcagcgac cgccccgccg tggttgcggc gacacagccc gtcaaacaag
    24841 ccgacgcgtc cccggtcagt cgtccggcgg ccagaacacc ggcgacggtc ggtttcaatg
    24901 gggaaattca tatacacctg cacggcgttg aacggcagga cgcccgcgag ctgggccgta
    24961 ttgtggccga tgcagtcagt gccgaactgg cccgccgcga cagacttcag cgcggcagct
    25021 tcagagacag agagtaagga gaaaaaccga tgatgatggt atacgggttg tttgtgtttg
    25081 agctgcaaac gctgccttac cagcagcttc aacagtcgcg cgcctggcga catgtgaaga
    25141 atgagcggat caaccgttcc gcgaaatggc aatacattgg cgcgggggaa gatcagatca
    25201 cgctaagcgg tgtactgtac ccggaaatta ccggcgggga agtctcatta actgcactga
    25261 ccacgcaagc ctacagcggc cgcccctggc cgttgattga cggtaccggg cagatttacg
    25321 gtatgtacgt gctgactggt atgcagacca cgcgcacaga gctgaatcgc tacggaaagg
    25381 caaagaaaat tgagttttcg ctgagctttc agcgctgtga tgaagacctg cgggaaaagc
    25441 tgcaatcttc atcctttagc gacctgatgg acaatgcgcg tagcagtgca aacaaagcga
    25501 tgaataccgt cagcacggcc atgacggata ccgtcaacac gttaaaaggg ctggtttaac
    25561 ggccctgtct aaacagggcc gggtaagtca ggtggaggga gtttccggcc agtcgatatc
    25621 cggcgcggca gaggtatcaa ggcggcttaa ttgcaccaga taggttttcc atgccgtcag
    25681 cgcggtttgc tcggcgtccg tcgccatccc caagtccgcc gcgtaaccca gttcagtaat
    25741 gcgcgccgtt gcggctgttt tccgcgccgc ctgttcctgc tgtgccgctg ccacttctgc
    25801 ggcgtgttgg gcagcaacat cagttaccca tgcgttacca tcccacctgt caaatgccgt
    25861 cgctggagtc agtagcgtga gtccatcatg taactcgccg agtgctgtca ctgtttgcgg
    25921 ttttccgtct gctgtgcggt atgcagtctt accgcgatga tcttccacgg cttcccacgc
    25981 accaccatca gcacggcggc aaactgcctg cccttctacc gctggtggcg gcacgtcagt
    26041 ataactatcg gccggtattc ccgtaccgcg catcaaaaac tccacacctt taccagtgta
    26101 ctcacgggta acatgatcgg cgtgataaac cgtaatccat cctgcatcga cagccagacc
    26161 gttttcatcc agttcagtaa tgattttttc agccatgtta tgcagctctc acgatgtagt
    26221 taaaagcgac attgcggggg cgtacatacg aacgcgcccg cgatccgttg tgttcatacg
    26281 ctggtaaatt gctgactgcc gcatattcat cagcattaaa tgtgctatcc acattatcga
    26341 ttctgattgt tgtcgcggcg gtgttgtttt cgatgttcgg ctggatccac gttgccgcct
    26401 gcgcagacaa aagcgtacgc tctgaatcca ccccgcgccc atcatcccag ccgcgaataa
    26461 actcgccgcg caaatcaggc aacgtacctg acggatacag tgcagccaat ttcggataga
    26521 gggttttatc aaacgcctgg ccgttgcatt taagccagcc cgtcggcgct atcgcttgcg
    26581 gccagggcag cgggatccct accatctcgg cgatatccag ttttaactga ttcgcggcag
    26641 taacatcggt tgataatgca tactgcgggt gaggattggc ggcggagagg tgcgccgtta
    26701 tcagattgtc ggcgtaggct tttacttcaa tcttggcgct acttgtctgg gcatcgctat
    26761 aagactttgc ttcgcccttg acaccattta tcagtgcatc ggtgtagctc ttcgtttcag
    26821 tctttacacc gctaatttgg ttatcggtgt agagctttga ttctcccttt gcactgctgg
    26881 cctggccgtc agcgtaggct ttcgcctcgg cggctttagt atcggtatac gcccgcgttg
    26941 ccagtaccac cgacgggtcg attttcagcg ttaccgcgtc ggtactgctg acaatcaaaa
    27001 tcatgcgtac cgtttgcacc cggccggagc cttcctgtag ctgcggctta taggtttccg
    27061 ggcagttggc gacggcaatc agattgtcgt tggcgtcata cagcccgatt tcccgtatcc
    27121 accagccgcc ctcgtcttcc ggtatcacct gttcggcaat aatctgaccg gggtttgccg
    27181 ggtcaacgct cagggaattg agcggtgccc ggcgacgctc attgaccagt ttggtttgtg
    27241 ctgtgtcggg agtcggcaga gtgccgccac cgtcgccaag cgccatttgt gtaatcgata
    27301 gttgccgccc gagcgcggta gcgtttgcca gcaacgccgc gccggtgtta gtcatgatcg
    27361 catagtattt tgttgtcatg cggatacgct catattgtca gacagatgca ccactgcacc
    27421 gcgtacatcg atgccagtcg tggtaatggt ttcagggaaa taggggtaaa cggtcagtgc
    27481 atcgccgctg tactgcccgg cggccagcag gatattaccc gcgcagtcca tgacgatatt
    27541 tagccccagc aggtgacggc tcaccggttt ggcatcggca atcagtcgct ccagttccag
    27601 ataggtttct tcggtgatgc cagcatcctg cacgccgata tccagccgga aagtgcccgg
    27661 ctggccgccg gtctgccacc attctgtgac ccgaatcaga tagccgaaag gctccaccac
    27721 ccggcgcaat gccgcgaggg tgcccttctg gcggtgtacc agccaggccg ccttgatcac
    27781 ctggcgtttg gtctgttctg accagcgttt atcccagcgg tcaaccgaca gcgcccaggc
    27841 gaggtacggc agtagttgtg ctgggcagcg ctcggcgctc cataacgtat ccagacagac
    27901 cgctatctca ctcaggcgct gggtggagtt agcgacgttg cgcataaagt cgctggctga
    27961 tgggggtagc agactgttac tcatcgctgc cgccctcggt gaccgtgaac ccggtgcagt
    28021 acgctgcctg cgtgtcgcta atcacgatgt cctgcgccgg ttccagcagt tcaacgcgtt
    28081 gcactccttg cacatgcagc gccgccatga tggccgagcg agccacatcg cgcccgatgc
    28141 gcccctgcgt accgagccat gacgttaacg cctgctgtgc cgcctgttgg atcggctccg
    28201 attccggccc cggatagcgg tacaacaccg ccgtaatggc atagcgcaca atcccggcgc
    28261 tttgcaccgt caggcggtca ccaaccgggc gtttatcatc ggcagacagc gcggcatcga
    28321 ctgccgccag caggtcagcc gaagcgctgc catcaccctc ggtggataac accgacacca
    28381 ccactaccgc cggggatgga ctgatcgctt tggcatccgc caccttgccg ctggcacttt
    28441 tggcgaaata ctcatacgca ccggttgggc ccgccacgct cagcccttca aaggcggcct
    28501 gcgaccgtaa acgtagcgcg ctgtcagctt ccatcacggc atcggcggtg tcggtcgctt
    28561 cggcaatggt tagtcgctgg gtgttcaggt tggccgccag attatccaga tcggatgaca
    28621 cggcatgact gagcaggcag gcctccgcgc cttcgttaat ccgctggcgt agcatcattt
    28681 cccggtaggc gatcacctgc gctatcacgg ttaacggctc ggactccagc gacagcgcag
    28741 cggtcacaga cgcctgctga gcggccggaa aggcggtaat catcaccgct ttcacgtcct
    28801 gaaggatgac ttcgaagtcc agcacttcaa tgatctgcgg ctggggtaac tgcgataaat
    28861 caaccgtcgc catcaccgtg actcctgagc gtaagggtag agctggccgc ctgcatcgtt
    28921 tcggtaatca atcctgataa ctccgcttcc accgctcccg atgctgaata acgaatatcg
    28981 acggcattca gcgagatacg cggttcccag cgcgtcaggg caataacggc agcactcatc
    29041 aactgaagcc gcgtcacagc gttctgcggc gcatccaaca ggtcagggat caggctgccg
    29101 taatcccggc gcatcaccct ggatgccagc ggcgtagtca gaatgtcgcg cactgactgc
    29161 cagagctgat ctgcatcggt cagggtgccg gtgccatgcg gattcatgcc ggtataggtc
    29221 gcggtcattg tgtgccactc gtccagctac cgccgggctg aatgccaccg tggcgatggc
    29281 tatccacctg aacgccgtta gaggtcatcg cgccgccaga atgcgccacg ttaccggtca
    29341 gggtgccgcc gtgggtgatc tccacggtgc gggccttcag gtgctgagtg cattccacca
    29401 ccggcgtgtt cagtgtgacg ctgactgcgg ccaccacgtt ggcggttttc atgccggtgg
    29461 cttccagcgc accggctacg gcgtcatacc gaaaccgggc accgtccggc gcggtgatca
    29521 caatttcctt caggctgttg cccggtgccg ggtgggcctc gctgaacagg ctaccgatga
    29581 tcacggctgt ttccgggtta ccgccaaggc accccagtaa cacctgttcc ccgacggcag
    29641 gcgggaacca gacgttaaac gccccggcgc gtgtggtgtt ccagcgtagc cagtcggtga
    29701 gcaattcacc gctcttaacg cgcactcgcc agctttccgg gtcaaccgcc gtgacaacgc
    29761 cgacacgcaa caggttttcc agtaatcgca tcagttcagc gctcatgtgg cagcactccc
    29821 cagactgttg atcaccgttt catggatcag tcgctcatca gccagggaga tccccagcag
    29881 ctcacgcaca gggtagcggg caaaggcacc cggcccgacc ttgtcacgct cgccatactg
    29941 atgcacgcga gcgatacggg cggcgatacc atcaaagccg acgctggccc cttcggtatc
    30001 ggcctgcatt ttgagaaaac gataaccgcg caggcgctga aacatcgggg ttgtcttgct
    30061 ggtcgtgcgg cgcactgcct gcgtgttgat ctcgatataa cgctcaatat cgctgcggta
    30121 aaacgtgcgg atggcgttgc ggtcttcatc aaagccggtg atcgtgcggc cgtgttttcc
    30181 ccggccgccg tgccagtttt tcaggtggcg cacctgacct tcccagacaa ggaccattcc
    30241 tttttgcgag cgcagcacct tgcggcggcg ggtcgcatag gctgagccgt ccgggttcct
    30301 ctgcgccctg atgcgctgct gttgactacg gcgcagtgcc tgcccgacct gacgggccgt
    30361 tttcagccgc ccggcgggtg acaggccgga aaggatgtca ccaaacacct gatccagtgc
    30421 gtgaaacagt ttatccgtca tatcgctgtc accccggagg catcgtcaag caccgcatcc
    30481 cataccccgc cggtgaggcg cggacgaggt tcaggcaggt gttcggcacg caggatgccg
    30541 ttatcgtccc gcgtgacctt aacccgctcg cgcaccggga tttcaaacag gatatcggca
    30601 ctgtcgtcgt tgttgataag cgtggtgaat ttcacctcgc ggttcttttg cgggttcagc
    30661 aacaggtcgg gctggttctg ccacagccag gccattaacg gtaaggtgaa atcgtcgata
    30721 tcgccggtga agttcatcac gaacagcacc agcgagtagc ggtacagaaa cgacggtgtt
    30781 tccccggtgg tttcaatacc gccttcttcc acaaataccg tgaaggcttc cgggttggcc
    30841 cggcaccagg tattggatgc cgtcagcgca tcacgcagcg aatcggtttt cagcatgagc
    30901 attcccctat ggtgtggcgg cggcattcag acgctgaagg cgacgcaggt atacatcgtt
    30961 gatggcggcc ttgtctgcgt tgcaggtgtc cagcgcatcc aaaagctgat cactccagag
    31021 cgcgaccgcg ccccaggtca ccggtgtttt cagtacgggc gtcggtgtgg gtgccgtcag
    31081 gctgggcggt accgggtcgt gcagtatctg cacgctggac gacggcggcg cgtttttgca
    31141 ggctgtcgct gacagcagca ggcaccacag tgttagcgca cgtatcgggc tgcatatcct
    31201 cgcgcatctt ttcacgacgt tcttcccctt cggcataacg ctgttgctca cgctcgcgca
    31261 cctgcgccag cacgtttctg gcatcgtcag ccagtgcccg gacttcgttt aacagctcgc
    31321 gctgttgttg ggcactgtcg gtcagtgcct cggtatgcgc ccggtcgatg ccgcgctggt
    31381 aggtttgcca gagcacacca ccgacggcca gcaccagcag cacggcaagg gtggctgcaa
    31441 gtttcatggc acacccgcca gatcacgcag gcaccaggct ttaaagtcgc tgcgacgact
    31501 gaccagcccg gcggagcgct ggccgccgct gttgacaaaa tcggtcagac gatcacacat
    31561 cgcgggccat tcctgcgcct gcgcgtgttt ccagatggtg gtgcgctgct tgctgccctg
    31621 ccggttggta aaccacatca ggccactgca accgaggtta aacgccgtgt cggtcatggc
    31681 ttcaaacgcc gattgcggca tggctgcgcc gttaaaattg ccgttgacgc aattctctgc
    31741 tcgctgcatg tcgttaaccc agcggcgggc gatctcgtca ttgctgtacg gccggttttg
    31801 cacgttgccg gtagagccaa tgcccaccgt cagcacgccg gcggggcagt aatacggcga
    31861 cgcccggcag tcttcccaac tggccgtttt ctgctgtgct tccggcgacg tgcgcagggt
    31921 accgggggac agcgtgacgc cgagcgccac gatcagcgca atcgaacagc gtttaatcgc
    31981 ggttttcatc gtcaacgtca ccctgatgca aaatggccac cgcacggcgc tccgacgtat
    32041 tcagcgtgcg gcgctcggac tgctgtaaaa tctgctcaat cagttcattg cggcgtcgct
    32101 gtgcgcgctc gatacgacgc cggaacaacc aggcgcgcca cgcggtgaca acaccgataa
    32161 ccaggcccgc cagcgcaact ttttcactga cggtcatcac cccgatgccg gtcaccatca
    32221 cggacaggcc ataggtcacc ccatcattga ggcgctgaag atcgtttaat cccataactg
    32281 caccgtttcc tgttctgtct gacggggaat atcaggcaac gtgatagcct gcccggctgc
    32341 cagaaacatc tggcggctta accccggatt ggcggcgatc acctgctcgg tgacaccggc
    32401 ggatgtgccg taatggcgat aacagagcaa gtccaccgta tcgccctgaa gcgcccggac
    32461 caccatcagc acaactccgc aaaaagccgc tgagcaccgc ttatatcggc gatgctccag
    32521 cgcgcatcac gccataaatc gtcacactgg ttatcaaagg tgtctgttgc cttgtctcct
    32581 ttggccgtgg tatccacatc gcggtatccc tccagcaaca gcgcacgggc aatggcataa
    32641 accgcacgcc tgaagcggta caccttgata ctttcgctgt tgacctgtct ggccggaacg
    32701 tccgccagtg cggcatatcc ggcggcctgt tgcgtctgct gccagctcgc cagctggtca
    32761 gtcacatgca ccaccgcttc aatggtgacg tgcatcaggc gggtggtggt gataccgccg
    32821 gtgatgcggg cggccaggcg cagatcgcgc aggacgatca ccggccagaa cgccccggcg
    32881 ctgaccgtcg ccgtgccgtc gtcaatctct ggtacgtcac cgctgtcgct gacacgtttt
    32941 tgagctacca ggctcatgct caactctccc aaaagtcagg cggtgggcac cgggcaaaaa
    33001 gaccgtatgc gggcagatca cccggcgcgc cgcctgtcgg acggggccga agtcgttaac
    33061 gtttggcaga ctgacgggcg gctttacttt tgcccgtcgg ccgtgtggtt ttccgcgccg
    33121 tggtgttacg cacggcggtc ttttttaccg ctggctgcgt ggcgtcggct gaagccgcag
    33181 gcggtgtctc cgtggtcgct tcatcgtcgc cgggcgcgcc gtcttccggt tcgtcactgc
    33241 tggccggcat gagctttttc agctcccgcg tcagggtggc gatctcccgt ttcactcccg
    33301 cgttcggatt acgggccatc gcttcccgga acagtgtcag tgcctcggct ttggtttgtg
    33361 catccactgc cgcacggcgt gagaaggcgc gggctttgca cagcttggcg cgcacttcat
    33421 ccggcatgtc tttgccatcc acaatcgcgg ccacttcatc cagcacggcg gtatacccgc
    33481 tcaggtcagc gtctgcatcg gtggttgcca gcgtcagcac cgggttgctc acttcctcag
    33541 ccagtaccgt taccgcatcg cggcggaact tgtcggcagg caaagacagg ccatgcttaa
    33601 cgacgtaacg ccccagcctc agtgtcagtg cgctatcctg gcagtcgata gcccatacca
    33661 tcagggtgac gatcacctca tcctgtcggc cgctgtcgcc ttccagcgtg ccatcaatcc
    33721 agccgtcata ttccggcagc atggcttttt tcatctccgc tttggtcgca tcagattgca
    33781 cctgtttcag cgcagcctga tgcaggcgca gacggtgaag gatttgctca tgggcagtgc
    33841 gtgacacctc cgtttcggtg tccgcctggc cccggcgctc ggccatgacc cgctgaaaat
    33901 gtcgttgtgc cggtgtcagc atggtgtgtt ctccggttgg ggcggggtgt taccccgcct
    33961 ggctgttact gaccgtcgct tgctgcctgc gcaaactgaa tcccgtcgat cagggccacc
    34021 ttgccgtagt cctccaccac aaagtcgtcg ttggaagact ggtaggtggc gacccggttg
    34081 tactccggtt cttcaacgat gctgcggcgc agcgccccca acaggtagta caccgacaga
    34141 ttcttgaacg aggtgatcag caccgcgttg gacgggaagt acggtgccag gaaggtcggc
    34201 aggccgccca cacgctcctg actgacaatc aactgaccgg ccagcaactc ggtattgggg
    34261 ttgctctggc tcagcgcatt gaggcgcgga aaattactgg acgtcagcag gtcagacgcc
    34321 atgatcacca ccagatccgg tgccctgcga tgccacggat ccagcaggct gtttttggcg
    34381 tcaaacacag cggtgtcgag gttgccgtag gtgcctttgg tgacaatctt gttgtcttcg
    34441 tcgcgggcgg tcagcgtgac gtttttgata atgcggtgcc ccgcatcgtt gcggattttt
    34501 tgcagccagc cgacaccgca atcctgcaac agcggattgg cgctgcggtt ggatttctcg
    34561 gcataggtgg taccgttgaa accgatcatg atgcggtcaa ggccgatttg tcgcgcattg
    34621 gcctggctga tcagcgcctg aaagttcggc tgcgatgccc aggcgtccaa ctgcgggtaa
    34681 ctgaccgccg agtcataatt caccttacgg caatgatagt cgttaggctc tttggaatgg
    34741 ttgtcagtcg gattgcggcg ggacgtgcca tcgctactgt tattggtgct ggcaatcggc
    34801 cctttgctac cgatcaggat tttctgacct tcctgagctt tcacgccaaa cacgttaatc
    34861 tgtttcagga attcatcgct ttcctgtgcc gcctgctcca tacgctgctg gatggccggt
    34921 tcaacgctga aggtcatcgc cacggcattc ggctgcaccc cgttaagctg tgcctgacgt
    34981 gatatgtact gatcaaaaag attacgggtc gtgttttcca tgttcgcttg tctcgcttaa
    35041 cggtacttaa aagtcagcca gttgcgcgcc gctgttgccg ccgctggccg ccggacgctg
    35101 gctgtaactg ttatcctgcg tcgccagctt ttgcgtgagt gcggccagtt cgctggtcag
    35161 cgtctgaatg gttcggctgt cctgctgttg ttgggttttc agcgtgttga aactgtccag
    35221 caggtcggca tgggactggg caacgttttc caccgcctca cgcacctggt taaactgctc
    35281 actgtccgat ttacggcctt tgccgataat ccccatcacg cgggaaaacc attgcttccc
    35341 ctcgtcgctg cgctgttcgg acagctcaac cagctccgct tccatcgctt cggtgaacat
    35401 gaccggctca ccgggcagat tgttgaatgc ctgcacctgt gcccgttgtt gtgcggcgaa
    35461 tttcaggcga tcggtgccca ggctggccgg ggtatccgtc atcgccaggc cgcgcagata
    35521 cggtttgccg gtcgcagcaa actgcgggtc gatttcgata ctggaataaa tcttcttccc
    35581 ttcgccggtg agttgcttca ttcgctctgt gggttcgatt tccgcataca acgcggcacg
    35641 gccttttagc aggccgtcgg tgatgtcttc cgcgcttagc gcaataacat cacccattgc
    35701 actgaaatca ctgcccggat agggggaaag aatgtgctca acgttaacgc gggcaccgta
    35761 tacctgcggg ttgtagcttt ccgccattgc atagaggtgg tcgcgtccga tttcacgccc
    35821 gtcaacggtg gggccggaga cggcaacccg gaattttttg cgggtcggtt tagctgtacc
    35881 gctcatgcct gtagtcctgt cctgtggtgt ctgtgacatc atgattgcag agcctaactc
    35941 cctgtctcaa cgcggttttg ttgtcggcgg aaggccagag ccgaaagtga gcgaaaggcg
    36001 gatcgcgcgc ggggtaatct tcccggcaaa gggggaaacc gcgcatgatt caggacgcat
    36061 ttgtacggca gcgagcaaaa cagctttact ggcagggtta cccgccagcg gaaatttcgc
    36121 gcctgatggg gattaatcaa aacacggtgt atgcctggaa aaagcgcgac gaatgggacg
    36181 aaacgccgcc tatccagcgc gtgacgcatt ctatcgatgc acggttgtgc cagttggccc
    36241 agaagccgac taaaaccggt ggcgacctga aggaaatgga cgcgctgacc cggcagttga
    36301 aaacgctgaa tgacggccag ccgggcaatg ccgcaggcgg caagaaaccc cgccagcgca
    36361 aggtgaaaaa tcacttttct gacgaacaga tttccgcgtt gcgaaccaac attctcgact
    36421 cactggcctg gcatcaaaac ggctggtatg agcaacgcca ccaccgaaat cgcatgatcc
    36481 tgaagtcacg ccagattggt gccacctggt attttgcccg tgaagcgtta ttgcgggcgc
    36541 tgcgtgatga cgtggcttac ccttatcagc gccaccagat ttttctttct gcctcgcgcc
    36601 gtcaggcaca ccagttccgg ggctttatcc agaaggtggc ggaagaggtg gacgtcgaac
    36661 taaaaggcgg cgacaaaatc gtcctgagca acggggctga gctgcatttt ctggggacgt
    36721 ctgccgcgac ggcgcagtcc tacaccggca acctgtattt cgatgaattt ttctgggtca
    36781 gtaactttgc caacttgcgc aaggtggccg gggcgatggc gaccctgaag gggttgacgc
    36841 gcacctactt ttccacccca tcgagtgaaa cccatgaagc ctacccgttc tggacaggcg
    36901 cacgctggaa tgagaagcgc agtaaggcgc aaaaggtcgc gtttgatgtg tcatggaaag
    36961 cactcaatag cggtttgcta tgcccggata aaacctggcg tcagattgtg acgctacagg
    37021 atgtcatcga tcacggctgg gaatacaccg acctggaaga aatccgcgac gaaaacagcc
    37081 cggatgaata caacaacctg tacggctgtg agttcgtccg cgacggtgaa tcggccttta
    37141 atctcaacct gttatttagc tgcggtgccg acggttacga cgagtggccg gactggaaac
    37201 ctttcgcatc acgcccgatg gctgatcgcg gcgtctgggt tggttatgac gccaacggta
    37261 gcagcggcaa cggcgacagc ggggcgatct cggtggtggt accgccactg gtggcgggcg
    37321 gcaaattccg caccatcgaa acccagcaga tacgcggcct ggagtttgaa gaacaggcga
    37381 aagtgatcga agcgctgacc ttcaaataca acgtgcagca tatcgccatt gatggcaccg
    37441 gcatcggcga agcggtctac cagattgtta agaaattctt cccggcggcg gtgtgcttcc
    37501 tgatgtcggt gtcatccaaa cgcgccctag tgctgaaaat gcttcaggtc attcgtgctg
    37561 gtcgctggga atacgaccgc agcgagcagg cactgatcaa cgcgttcaac gccgtgcggc
    37621 gcgtcaagac gccaggcggc atcatgactt acgacaccga ccgcgcacgc ggctctaatc
    37681 atggcgatct ggcctgggca accatgctgg ccgtcatcaa tgaaccactc ggccaggagc
    37741 agggcggcgg tggctttgcg atggagttct gatgaaaaga aaagataaaa ccggcacaca
    37801 ccgggcggtt accgccagtc agccggatat ggcggcggcc ctgaaaagcg atccagggct
    37861 gagcgcgttt acctttgatg gcccctatcc ggtcagggat ggccatgacc tgctggataa
    37921 catgtattgc gccgacaatg gccgttatta cgacaccccg gtggattggt acgggctggc
    37981 tcgcgcgttt ggtagtgcgt catggcacca gtccgcgctg tacttcaaac gcaatgcgct
    38041 gaccgggtgc tttatcccgc acccgctatt gtcgcgtcag gcgttctccg ccttcgtgct
    38101 cgactggttt gttttcggta acggttacct tgaacgacgg gtcaaccggc tgggcggcgt
    38161 gttgtccctg cgccacgttc cggccaagta cacccggcgc ggcagcgatc tgaataccta
    38221 ttggtttatc cggcagtgga aagatgaaca cacgtttgct accgacagcg tgtgccacgt
    38281 catcaaccca gatattcacc aggagatcta cggtatgccg gagtacatgg gcgcgttgct
    38341 gtcggccagc ctgtcgcact ccgccgatat gttccgcaag ctctactatg acaacggttc
    38401 gcacgccggg tgcatcatct acattggcgc atcccaggtg gataccgaaa gcatggataa
    38461 tgtgaagaaa acgctgaagg aagcgcgcgg taaaggcgcg tttaaaaacc tgctgttaca
    38521 tgcgccgggc ggcggtgaaa aaggggtaca gattattccc ttcagccaga tatctgccaa
    38581 agatgagttc ctgaatatca aatcggtgac gcgtgatgac attctggcag ctcaccgtgt
    38641 gccgccgcaa ctgatgggtg ctatgccgga aggcaacggc tcctttggcg atgtggagaa
    38701 ggccgcgcgg gtgttcgcca tcaacgaact gatgccagtg atggaagcgc tgaagcatgt
    38761 gaatgactgg ctggggatgg aggtgatccg atttaatcct tatgccctgt tgaaagccga
    38821 gtgatatccc tccaccgccg ccgtactcac gcggcggttt ttattcaaaa aatttcacgt
    38881 cacctgcaca caatctcttt tcagatcaac ggctaacgcc acaattatcc atccgtataa
    38941 aaccgcctca gcgccgcgct gtcaggcgct atttccggat gccgcgccac gtctcccgga
    39001 gggaaataca cacgcagcag gccgagaaat gggccggatt tggcacatca aaggggatcc
    39061 ctgcctcccc tcaaagcgtg ggctgttccc ccgtcacctg cgcgctgctc tcgcttcatt
    39121 ttttgtgcaa gtgcagaaaa cggcccggcg cgcgtgcgta ccgggcggaa agggggaaaa
    39181 tagcatcaaa aaaattgtgc aaaattgtgc gggtttgtgc atgtgaattc ataaaaattt
    39241 aaagaaaaaa gaccgctttc gctgccatga aaattacgtg tcgagagaaa tttgtgtgcg
    39301 cagttgaata ggatttagaa ttgtatatcg ctggcgaata acattatata aatcaaagtc
    39361 ttttaccctt acacttatta ccatcgcata ttgcatatca ggggctgaaa cccccttaac
    39421 atggcgcgaa gaatctcggg cgtgataccg tatatcaaaa actggatcgc ttaataatgt
    39481 atcagcacta aattttttgc ttctgtgcaa acaagtttcc cacttatgac cttcactcct
    39541 acactccctt tcggtcttat actggctttt ttgaccaaag aaatcatcag tatcggcatc
    39601 gtctaggccg aatcttggac ggaaagttac ctgcataccc gcccttgtat agtttactga
    39661 atgttcagga tcgaccgggg tttgaatgca caaagtagcg gtaagttcaa atgcttcgtc
    39721 aaagggaaca tcggggaatg ggatcggtgc ccttaaatat ttattttttg ctaatgaacc
    39781 atagtaaatt actgtagcag tatcatttgc acaatcgatt aaaacgttag gatcctcact
    39841 aaaccgtccc caaccgatat gttcacgcga atattttctt gatgtttcag catgatgaac
    39901 aagcaacgct ttcaatgcaa tggtgttcaa tggggttcct gatagagccg caactccagc
    39961 ggccgttctc aatgctaatg gagatgcata actggttcct tgaactccga ctatagaacc
    40021 aagcagcggg ttgtaagtgt aaaaaggctc gtcgtcgctt ccaccaaaaa taataccatc
    40081 aggtttaacg aatccagggc ttctgccagg gccaatacag ctatatggtg cccgccccca
    40141 tttttcaccg ctacgatcag cagcaccaat cgctagcgcg tttaccatat cggaaggggg
    40201 ttgtattctc gctgcatcac cgtcctcatg accatcattc ccaacagcaa cagtaagtaa
    40261 tatcccatgc ttagcacaga tctggtctaa aatagcagtc catgcatgga cctcatcatc
    40321 accaattgga agatgaggac caatacttag attagcgaac ttatagtcac cactatcaag
    40381 aacggactgt attttcttaa ggacatcaaa caaatcccaa tcgccattgt cacctgatgt
    40441 tggtgaaaga actctataat gatctacatt cataaaaggt ctttcaaaag aaggtgcatt
    40501 ttcttcaaca cgtccgaata agaaagttga tgttacttca ttaccgtgct gcaataataa
    40561 tccacttgtc tctttggtgt ctggatacac gtattccgta acccaattac tcaagtcagc
    40621 tgtccccaag ccaccatcaa aaattgcaat acgttcggat tcaagaatag ctttagaatt
    40681 aggaaattcc ggtgtaacta tatttgataa ctttctgaca atgttcggct gagtacacct
    40741 tagagacggc atcggccgca caactcggat taatgaaaaa tcgagagttt ttttcatatc
    40801 ttcaggtcgc gcgtgtgcaa cgatgaaagt cagaccaccg acttggattt tacttttgta
    40861 atcaacagag acgccatatt gtgccgcata gttaatatag gctttaacga tatcatcgtc
    40921 ttcaacccca gcatgaagaa ccacttcaaa ttttatcgaa tcacttttcg catgctcaaa
    40981 attgcgtgct ctctcttttc cttcaaaaaa gctaacactt tcaatttcga tcaaatcctt
    41041 ttgcactccc ttcggagctg taggagaatt taagatttcc ttaaatctta taacggcatc
    41101 atcatcaccg ctgacaaaca gttgcgccgt tactaagtcc ttattctgat cgcactgacg
    41161 tgccgctttc cgtgggcgaa tgattacctg acggctaccg acatcccgta aacctgtcgc
    41221 tctaagcaac ccttctggaa agtagctttt acctaaaaag gctgggtgta atgttaaatt
    41281 gaacacactc tcacctcttg gcttagccgc atcatccaaa ctgcgaaagc gtgagagtaa
    41341 aatatcaatc tcggggttta aatgctccct tacttcttca atagtatagg gatagcgctt
    41401 accatccctt cctttaggca aaggttcctt ttttgtcaga acatgaccgt tacctaaaag
    41461 taagttcctt tccatcattt aaccccccac ttttgtaatt tattcgcgat tgttggatgt
    41521 gaaacaccaa ctaattcagc tatcttcctg tttgaaatac cgtcaaaatg atatttaatt
    41581 atattgagat cattatcact gaaatcatcc aatgaaaccc tctccataac tacggcttct
    41641 attaatgaac tttcaaatgg aatattttta agcactacat tctttttgga gaaattcaag
    41701 atacggttaa taatagcaaa ggacatgcca tctaaaaatg gtgcaagttt tttagatagt
    41761 ttaggctcaa tatcatgatt gactaaatat ctatctatca gttctactga tggcatatta
    41821 aatttaagga tgtgctcaaa tcgacgccaa acagccggat ctaagatatc agggtgatta
    41881 gtcgcagcaa caagaagcga ggtcgctggc cattcatcta tggtttgtag gagtacagta
    41941 actaaacgtt ttaattctcc aacgtccctg tcatcatcac gtctttttgc aacagcatca
    42001 aattcatcaa gcaaaaggac acatggtttc tctttggcat aatccataac ggatttaata
    42061 ttattgcctg tttttcccaa aagagaactc attacagatg agagatccaa tgttaaaaga
    42121 ggtaaattta actttgcagc aagccaatgt gcggacattg tttttcctac acctggcggg
    42181 ccagaaagta aaaccgtctt tacaggttca agaccagctt tgaacaaaga aactgcattc
    42241 tctctttcgt taacaattga ctccagcttc tttgatatat ccgtattcca tacaggttct
    42301 tcaacaattg cgttgacaga tgtttcctgc aaaaggtttc gtctggagtc tccatccaca
    42361 ggcataggag cattactaga tgccccacgc aataccgttc cctcagcaac taacgaagcc
    42421 agcttagaag caaaggtctc atcattttta cggatgttgt taatcatctt tctgcatagg
    42481 agtgtaaatg catttgcgtt gcctttgatg ccttgctcga tgagtttgaa aagttcatcc
    42541 tcccgcacat ttaccataaa acccccaata aaacatcaat ttatgtaatc tggtaactat
    42601 ttaagtgaaa attaatgaca aatcttacca ctctgaatgg cattattcaa agagtatcct
    42661 cactttttta ctgtatggat aatcagcgta aaatctatcc agcaggttta ctcgagcatg
    42721 ctatcaatac tcgtttccag cgattgataa gttctaccgt tttatctcct tcacttgtgt
    42781 cggcagcatg cctattcctg aaccagcgca actacttgat tttaacttcc atgaagcatc
    42841 tcgtaacacg gcgatgcgtt gcagcaatgc cgttgcttta tcctgatatt ccgtttcttt
    42901 ttgctttctc gtctgcatgc ggtacaagcg accgtcagca ctggcgacat agcaatggcc
    42961 ggcaaatgtg atcgcattgc ctgccacaag tcgccgcaac tcaccggtgt tgatatccca
    43021 gccaattgag cgggcgaaat cggcaatact ggcacgccac tcgtccgaca gtttgccaac
    43081 cacctgtttt tcagccgatt tgttccgttg agtagtggac gagtattgat tattccgccg
    43141 atccggcggt tgagttcgca acctggacag cagcgcccgg cgttccgggt ctgtcatgcg
    43201 ctcgaagtcg gcgaaggttt gagtggatgt atcgccaggc tctccatcga gcggttcaca
    43261 gccaccatag ccatccccgt ttatacctgc tgaaatggct gttttttcat cgcccgtaga
    43321 gttattgaca gaactccaag cgtcgccggt tggcgacgta acggccaaac cactcccggt
    43381 gccaatgctg gcaccatcgt cagcggactg cttcttgcgg attttccatt tgattaaccg
    43441 ggtgcagata cgggatatcg cccccagacg tggagagaac acaccgaaga ttttttccgg
    43501 tgtctcgccg taggtgtttt gttcgtcagc gtcttcatag gcaatgcgca cggtgtagcg
    43561 ctcgcgtggg atcaacacgc cgccttgctt ttcgatgtat gtggcaaaac aaccggcgtc
    43621 agccgatgcc agcacggcat ccattgccgg gtcagcaagc tgtgcggccc cgcgtttaaa
    43681 cgtgccgttt tctttctgga ccgcggtaag ttggtttgcc aggcgacgca gttcacgcca
    43741 taccgttacc ggcggtagac cgaacggctg aaactgtcgg atgttatgct gtgatgccca
    43801 ggccattgca aactttgccg tttcgcgtaa tggcttgccg gtttcgttat ccagctcgcc
    43861 atccagcgcg taaccgtcga tattctttga gatgtatttc gccacgtagg ccgtagcgct
    43921 gccttttctt ggatcgagct tttttgcctt gaatcgtgcg ccggtgttgc gtcccagctc
    43981 cgcacggtct tcagcaataa aatactctcg caagatatcg gtgatggcct ttctgtcggc
    44041 aggtggcata aacagcaaca catgccagtg cggtgttgca tcgtggtgcg gctcggcaac
    44101 gcgaaagccg taagggcgca agccacgacg attcaacgca gacatggcac gcgcccaggt
    44161 gcggcataaa taccgctgcc cctgacgtgg agaggtatga tcccacttag ggtttgggtg
    44221 accgttctgg atgttagcgt ggtaacgcga cgggcaggtg atagtgagaa aaacgccttc
    44281 atcaccccgc gcgattgcca ccatttcaac accggccata cgggtcatca gctcatgacg
    44341 gcggatagcc ggattactga tactgccgta caccatgttt tccagtgatg cgatgttgcc
    44401 atcttcatca accagttcat gtgtctggaa aaaagcgcga ttcttgcggc gctgctcttg
    44461 ccactggtta agggcatcaa ggctgacata cggcattcgt tttttgtgga tcacgccgat
    44521 ggcacgaaac tgattttccc gccattcaca acgcagtcgc cacagtttcc gcccccacca
    44581 ttcaggtgaa gtaatgcgta aaatggcgga atagatgcga tgccgggctt gttcatcacc
    44641 gatgaccagc ccccagcacg gtggcgttac acgtaatgcc agcagttcgc gccccagatg
    44701 gcgatacagc cactgaattt cattgtcggt catgtcttcc ggcgatgtgt ggccgcactc
    44761 ggtttcaaac atttcggcga tggcggccgc aagggtatgc gcggcattga tcacctcatg
    44821 cttggtaaac ccggccagat gcgcccaacg cggcccccaa taggccgcca gttccgatgc
    44881 aaagccatca cgcacacctt gctgtgcgcg cacagcatcc agacgcagca gggctttttt
    44941 cacggttccc atgaaaaagg cgctgatgtg tcgcggctcg cggtttgcac gtagccattc
    45001 aattttttgg cggtaaacgt cacggataaa aaatggttgt tcatgcaatc gggcttccac
    45061 gccttccggc gttttcatcc aaccgctgac cgcttcctga tgatcccggc gcactatttc
    45121 cgccagaccg cgccggataa gcaactgggt accgttcggc tcccggtgat ccaactgtgc
    45181 tacggcttga ttaagattcc ggtcattacc tggcgcggac agagcgtgtt taaccatccg
    45241 gctcagataa cgtgtgacgg tgggatgcgt ttcagcatcg gtaacgagta gagaggggcg
    45301 aagatcagcc acgcccgacg gtgctgagat cgccgggcgt ggagcgttcc aagggtaggc
    45361 ccactgttca ggcttcactc acaaaccccg gcgtaaacac tgctgcaaac cgccttgtcg
    45421 tttgccgccg ccaaaaggtc gaattgcgcc cccccgcgtg tcgtcatagc ccaatcgcgg
    45481 taagactcaa tgccgtattc atcaacggta attatgtcaa tccgctgttc cgctctacgt
    45541 ggatcatggg tggaagggaa aaacgttgaa tttcctctgc gtgagcaggc ggctaccagt
    45601 ctctcccact ccgcaacacg ctttatttct tcaggccagc ggctgaatat ttccgccaat
    45661 tcagacttac gggcatgaat gcacggcata cacccaaccc ggctacagcc ttgttgatat
    45721 aacgggttag gcttaatccc atgacgctta gcaatggcga agacgtcttc atgtttccat
    45781 tcaaggatcg ggcgataaac atgcaaaccg ggagtgttat ccgcatcttc ttcccatact
    45841 ggcaaaccgg cccgggcggg tgactcttga gcgcgaaccc cctgccaact tattacctcg
    45901 tcatattcat caagtgcagg tagaactacc tgagtacgca caggttcgtg cttaagctcg
    45961 aaggtgcaaa atcgggcttt agtgctgggg aatctacctt tcagcatgca aagatcgaga
    46021 aatggattgc cagttggccg gagattatca agagctgact taaccctagc agcagcctca
    46081 atctcagcct gttgctggtt aagacccttt acagatggaa tccactgaaa cccatttaag
    46141 acagcagtgt tataacgatc atcaggcaca gattcaggcc atacaaaacg ctcacgcctg
    46201 ccattagggt ataaaagata ctcatcaaaa taagtatcat cgtcgtcatc taacattatt
    46261 ttctggaccc ggaaacctgg tgccagcgcc caatggccgt caaatctatc tgtcatcagg
    46321 tcaatgatca gcccctgata ccagttattc gcaatgaagt ttcgtttctg ctctatctgt
    46381 ctggaaaaat cagcctttac tcgtttaatt gggcctaatt tgctttccaa atagcccaaa
    46441 tactcaattg tctgcgggtg ctcatggcct gtatcagcaa agacagcgat gtgatgcact
    46501 ccgtgctcaa tggccagaag ccattgagcc agactgtctt ttccgcctga tacgctgata
    46561 acgttgatgg tgtcgttctg aaagcaacgg gaatcaatca tcagaacggc tccgcgttca
    46621 acgcgccgga tgccaccatt tcctgatagg tggcatcacc catcactggc ccacagtcag
    46681 ggcagtgccc accaccttca tagccgcacc cgtcgcaaac tttcgacagg ctttgggcag
    46741 caggaatcgg cagacgctta gcaatgattt ccccggcttg cttgctttcc ccggcagcaa
    46801 cgccgacgct acgcggcgcg gtgaaacggc agatatcaaa ccggtggtaa aggctgtgtg
    46861 cgtggtgggt atcactgttg gatgcgatga cagggattcc gcgttcggcc agacgcgata
    46921 acgcgccgca caagtcatac tgatcgttgt gggtgaaacc atcggtgtga taactggtga
    46981 agctggccgt tggcgtttgc gggatatacg gcggatcgca gtacaccaca tcgccggggc
    47041 ggatcagttg caatgtttcg ccaaacgcag cgcagatgaa ttttgcacgg cgagcttttt
    47101 cggcaaatgc atgaatctcg gccaatggaa aataaggcga tgcataatgc ccgtaaggaa
    47161 cgttaaaccc accggcgcgg ttatagcgac aaacaccccg gtaaccgtgt cggttcagat
    47221 aaagaaacag tgccgctgag gtggtgcgat tctctttgct gcggttaaat acctgacgga
    47281 agcggtaata actttctgct gtattcgcag tgcgaaacag accttcggca gtatcaataa
    47341 actccttcaa atcctctttg atgacctgat acaggttaat caggtcagga ttgatatcgg
    47401 caatcaggta ttccgggtaa tcggtattca tcatgaccga acacgacccg gcgaacggct
    47461 caaccaaacg atcaccagcc ggtaaatgtt cgcgcaggat atccatcacg cgggctttgc
    47521 tgccgaccca tttcagcggt gtggcaataa tgctcataag gcacctcgat agtgtttgtt
    47581 tttcagttct gcatcgccct ggcagtacac gcacagacgc acacccggaa cggccacgcg
    47641 gcgggcttca gggataggtg cgtcacagct ttcacagacg aatgcagaag cggcacagcc
    47701 cgactgttgc cgggcctgct ggatttgcgt ttcacgaatg aacgcttcgc gttcctgagc
    47761 catgtccatt gagtccatca gctcaacccc tgagcggagt gctcaaaacg ttctgattcc
    47821 tggcgtatca gttccaccac ttcggcgacg gaaaggtcgc gttgttgagc gcggacagcc
    47881 agcgcagcaa ggcgcagtga gaaggaaaaa tgctggtctt tgcgttcatc caatcgggcc
    47941 tttttcagta gctcgaccaa tgcgccatca ttggcgacag tcatggtttt tacttcggca
    48001 tttttcatta cgttttcctt ttttcaggta atagaaagcc cggcgggttt acgcctaaaa
    48061 attgggtttt tattacagtg gaagaattaa gtttttgggg aataaactca caactgcgcg
    48121 gagcttattc attgctttaa tcagcctttc tttttcgtca gttgtcagtt cattaaattt
    48181 caggtgatgc cgttccttat caatatccgc taattcaaat attgctgaca gcacacgcat
    48241 atttttatgg taatcgtcat caatcttgtc ccgcatatcg tcaataaagc ggcacatttc
    48301 tttctcactg tttgtcttga agtgtttccc tcgcagcatt gctatgtggt ttagcccctc
    48361 tgttctttcc gcgatactca gcggaatggc gcgagcggac tcggtgttag ccatggcatt
    48421 agcctttctt tgcccaatta atggcaaatt ctggtgcctg catcattcca tctcgaaacc
    48481 attgattcga atggctcttg ataaattgat acagaggatg attgaggtaa tagacagcat
    48541 cagccaatga ttccagcgac gacaaaacgc taatccggtt gtaaccattg tcgctgccgt
    48601 tctcttgcac atcagcaggc tgagataaaa aactctccgc agcatcatcg gcggcctgta
    48661 gccatatttc cgggttgtga tttattttca tcattaccac ctactacgcc gcaataccca
    48721 tgaggcggga aaaccagcgg cgcttttgct taggcgctgg catgtagggc ttttgactcc
    48781 agggtgcgaa atagacctga ttaacggacg gcttaacgcg ttgaccgttt ggcagttcca
    48841 gccagccttt accctgatta gggattactg gtgatggtga ctgagaagtt aatagacgag
    48901 ctatggaagt catattatcg cctcgctgtg taaaggttat cgatataacc ggtggctaat
    48961 gccagtgcat caaataaacc gtaagactgc ccagcctgac taacacgata tcgggtaacc
    49021 ggatttgata tcgttcgtgg acatttaata attgagaagc cccgatatac gtttgtgtgt
    49081 ttacttaatt gtgtaattgc gtattggcgg cctgattttt tattctccat gtcacccctt
    49141 tatattttac attccctacc ccacagcctt tttaagactg cgtttttgct ctcgctcttt
    49201 tgtttgcgct aatacgatct ttccatccat gccattctgg cggcgcgcca tccaccaatt
    49261 gtgccgcata gctatcccat tcacggcggt taatccacag ttcagcgtgg ccgcctgggt
    49321 ttaatgggtc tgccatgtaa aaggccggca atttcccggc ttttgccatc gctacaatcg
    49381 cggctggagt ttttccgacg tacagcgcaa aaccctcttt tgacaaaaga tcggctggtt
    49441 tctctgacaa tcgaatctgg cgacgagact caacgattga cgaatcatcc atgttattat
    49501 tttccccctt caggtcgcag ccccagccat aacagccatg cgtcacgctg ttcttctggt
    49561 cggttcataa acgcttcgcg catagcgcgg ttaaattccg ggatataaac ccaattttca
    49621 gcacgactag gatttgattt ttcaggattc atccacggaa caagcggcaa tttaccctta
    49681 tcaaccatgg cttttactgc cgcttccgat ttaccgatca gttcagcaaa tttcggatat
    49741 ggaacagcat caaccggata gcgaacctca taaacgcgtt cacccatcgc aaacctcact
    49801 tttcatttat tgaatatttg ccgggatttg gaatacggct aaagctgtca gtaacagcga
    49861 ctacacctgt atcgccttcc ttcatcctct ccccttaccg tgatactctc ttcagatcac
    49921 caaccgctta catcggcttt cagttgctta tgttcgcggt tggtttttca cgcctcgaaa
    49981 ggttcctgat tacagacctt tcgcaggaat atagtcttta acttggaacc ttgtcaaatg
    50041 aatatgggac aaaaaatcaa ggccatcaga aaagccgaag gtttaacaca gctaaagttc
    50101 tgtgaaatca gtggaatggc actgagcacc ttaaaaaatt acgagggtgg acacgcagaa
    50161 cccggccttc aatcaatcat gctgctcaca aaatccaagc agtttgaaaa atacaccctg
    50221 tggttaatga cggataaaac agcaccggaa gctgggcaga tcgcaccggc cctcgcgcac
    50281 attgggccag aagaaacaaa atctcaccaa tccaaccaga atattggata aatatttaca
    50341 taagttacat ctttgatatt gcatatcagg atgatgacta catcggagag tgttcttatg
    50401 gcaattaaga aactcgatga tggtcgctat gaagtggacg ttagaccgca gggtgccgag
    50461 ggaaagcgca tcaggcgtaa atttaatact aagggtgaag cgcagatttt tgaacgccac
    50521 atccttgtga attaccacaa caaagactgg attgagaaac cagcagaccg ccggaaactc
    50581 tcggaactgt tggcgttatg gtgggtgtat cacggcaaaa gccatgcgcg aggtgagatc
    50641 gagcatggga ggctaaaaac catcattgcg acatttgaag agatgggcgt ttcacaggca
    50701 gatcaattaa ccaaaaaagc catcatggat tatagggtaa acatgctgaa caatggatta
    50761 aaggcgtcca gcgttaaccg ccaccatgcc atcttaagtg gtatgtttac aaagttaatt
    50821 gacgcggaag aataccactg ccctaacccg ttcaaagatg ttaaacccct caaagaatcg
    50881 ctgacagaaa tggcgttcct gactgcatcc gagatccccg agctgctcag attattagaa
    50941 ggtgatgaat tggacgccgt tttggtttgc ctggcaaccg gaggaagatg gagtgaagtg
    51001 gccaacctga aaagtgaaca catcatcaac aatatggtga cgttcatgaa aacgaaaaac
    51061 gggaaacgcc gaactattcc gatttctcag gaactgacga accgtttaaa acgtgtgaaa
    51121 tcaggctatg ttttcaggcc aaactataga aaggtaagaa atacgctgcg tgcaatgaaa
    51181 cccgatttac cggaaggaca agcgttacat gtctttcggc atacattcgc cacgcatttt
    51241 atgatgaatg gcggtaatat cgttacattg cagcggatat tagggcactc cacgatccag
    51301 caaacgatgg tctatgcgca ctttgcgcct gacttcttac aggacgctgt aacacttaac
    51361 ccactaaacg gagtgtccat ataatgtcca tgaaccagca ctatttagca ctaattggta
    51421 ctttatgaat agcgtaacag gttgtttttc aaatgaatcc cccgccgatg cgggggctac
    51481 caagtcagtt attggtcgca ttcactcttt cgaatcctgt ggcaccgtag acggccccgg
    51541 tattcgcttc atcacctttt tccaagggtg tttgatgcgt tgcctctact gccacaatcg
    51601 tgatacctgg gatacccacg gcggtaagga aatcacggtg gaagagttga tgaaggaagt
    51661 ggtgacctat cgccatttta tgaatgcgtc cggcggcggt gtaacggcat caggcggtga
    51721 ggctattctt caagctgaat tcgttcgcga ctggttccgt gcctgccatg agcaagggat
    51781 taatacctgt ctggatacca acggtttcgt acggcgttac gacccggtaa ttgacgaact
    51841 gctggatgcc accgacctgg ttatgttgga tctcaagcag ctcaacgacg agatacacca
    51901 aaatctggta ggggtatcca atcaccgtac actggatttc gcccgttatc ttgccaaacg
    51961 caaccaacgt acctggattc gttatgtggt cgtgcctggt tggagtgatg atgatgcctc
    52021 cgctcatttg ctgggcgagt ttacccaagg gatgagtaac attgaaaaga tcgagctatt
    52081 gccctatcac gaattaggca agcacaaatg gacagccatg ggcgaggaat acaagttgga
    52141 tggcgtgaag ccgcctaaag ccgacaccat ggatcgcgtt aagtccattc tgaccagtta
    52201 cggccacaag gtggtgtatt aatcggtaag caccaccgct caagacaggg ataatccgcc
    52261 tgccttgctg accagccggg gttaacgtca tctgctgacg cactctggct ggctatcgct
    52321 accctttcca cttcctccat ttgctggccg atcccgttgt catcgcccgc aggcatcaca
    52381 gtttcctcgt tcgtcacgtg tcacaatccg aagcaagcgc gcacgataaa aataaaacat
    52441 gataacgatg atgtgacaga gagcagcgcg ccactcaatg agacaagatg gagaaactca
    52501 gggcgtcgtg catcacacat tgtgggacgt cgactcgctg cagataaagc gagcggtata
    52561 cgccacagaa aaaagacatt gaacaccatg gacggcgttc aatgctaatt gaaccagctt
    52621 atacccaaag taatcacaca tcaggaccag cgctcgccca cgcagacacc cgcacagcgc
    52681 gagaatagcg tgatactgac agcgagccag taacctgaat tacgctgggt atttgtgctt
    52741 cagggacaca ttatgcggct cgataaactg gaaattcgtt ggctgaaact attctgtaag
    52801 attgttgaga ataaaggtat caccaatgca caggaggcca ctggtctgag tcagccagtg
    52861 ctgagtcact acctgtcacg actagaggac acgctagggc tgattctgtg tgagcgcggc
    52921 cgcggtggat tttccctcac gacagagggt gagttggttt atcaggaagc gcgttcggta
    52981 atcgctacac tggatgattt tgccaatcga ctggctcgta tcaaacatga gctgattggt
    53041 gaggtgagac tgggctgtct ggataatatt gtttcgcatc cggagcgagc cgttccatta
    53101 gccatacgcc gcttacttga gttaagcccc gatgcatcca tgaacctcta cgttagcgac
    53161 catcagtcgc tgatggagcg gctacgcaac agcgagctgg atgtcgtatt gaccgtcctg
    53221 ccagacgatg taccacctga tattttcttc cagccagcgt ttattgagca cagctcattc
    53281 tatgctgctg cagaacacgc tggacgtatt gaacaggaat ggcgtgacgg cacccttaac
    53341 ccaaagcggt tattggttgg cggctacgcc atgaacgaga tgtgcaaaca actcgggtcg
    53401 gtagccaaac aaggacagca aagcattgcc tgtagcgagg aaggttgcat gctactgatt
    53461 ttggctggca cccacgtggg ctttttgccg gaccattatg cttcacgctg ggtgctggaa
    53521 ggcatgctga cggccattgc gccggaaaac ctgcggctca acagtatttt ttatctggtt
    53581 cgcaacgcca gacagcgatt aagcccggtg gctgaagtcc tgtggaacaa cattgccgaa
    53641 atcgggcaac tttcgccagc ctatcgtcga cgccgattgt aagtcagtcg gcatggcagt
    53701 cacctcatac cgccagtggt cgggggtgat ggtcggcttt tttcagcaga ataatcaaat
    53761 accctagaga gaccgctgca atcagcacaa acagtaactt atcggaatag gtttgcatca
    53821 gcatggcggc aaggctcggt ccgcacaggc tgccaatggt atagctaagc agtagagcct
    53881 gattcatggc gaccagctca ttgggtgcca ccttctcgca agcccacgac attgcgaccg
    53941 gataaagcgt aaatccggcg gcaccaagca gaaacagtga cgacgccatg ctataccgcc
    54001 ccggaagcag tatcgccagc gaaccgagga tcacggcaaa caccagcact cgcagcacca
    54061 gcaatctacc gtagcgatcc gccattcgtc cgacgggcca ttgtccgaga atacccgcgc
    54121 tgattaataa cgccatccag taaccgacac tggcgtcact catcccctga tgagccagat
    54181 acagcggcat caaaccatac agcgacccca gaatgatccc ggaaatcaca cacccctgaa
    54241 tccccaagcg ggcagtgcga tagcgtagca tccgccagac gttgacacgg tgcgtaacgg
    54301 gctgaggggg cgggatgcgg gcaaacagta acggcagagc agccagcagc accaacgcca
    54361 ccagccaggg cagaatactg aacagtgcgg tagacaccat actcaggagc aactgcccaa
    54421 caacgctgcc caaatagtag gccatcatgt acgcggccag caattgccct cgattgagcg
    54481 cgttaccgct gcacagcagc gcgctttcta ctacaaccca aatcagcgca caggcaatcc
    54541 cggcaacaaa gcgccacaaa atccagctcc cgatatccgg cgataatgct aatgcggccg
    54601 tcgcaccgcc aaacatcagt actgccaggt agtaactgcg attaaaaccg ctgtatcgaa
    54661 ttaacctgcc agccaccagc gtacccacca aattcccact gaaataggct gaccctacaa
    54721 cgcctacctg ccagaccggc aattgacgat cattgagcca taacggcacc agtgtattta
    54781 acacggccag acaaacagta agcagcaaca gcccacagag caacagcaga accgggcgtg
    54841 tataggttga catggaaagg caaaccgaaa aagagaggat attttgggcg catcatgcca
    54901 ctgacaatgg caaagtcaat cgccttctca ccggctgtcg cacattttgt ccatgcgtcc
    54961 cgattgccgg ccgatacggt gccttggcgg atatctcagc gccgggctac acgcttccat
    55021 tccagattat taccgaacca ctccgccaga aaatccacca gcgctcgcaa cgcaggcgac
    55081 attctctcac gcgagtgata caccgcgtaa atatccaact cttgcggctg tgattccgga
    55141 aatagtgcaa tcagccgttt actggcgatc agatcggtaa cggaatagac cggttgtaaa
    55201 cttactccag cgccatttag cgccgcctcc agcaacatca acgaatcatt ggcgctgaaa
    55261 ctaccgctga ccggtaccgc tatcgtgtct cccttacggg taaactgcca caggctctta
    55321 ccgaagaacg aataggtcag gcaattatgt acggccaggt cttccacgcg ctgcggtgta
    55381 ccgtgcgccg ccagatacga aggggctgca cacacgaccg acggacagcc tcccaaccgg
    55441 cgagcaatta accccgaatc taactgactg gtgatacgaa tagccagatc gatacgctcc
    55501 tcaatcagat tcagggtatg gcttgcaacc tgtaggtcaa ccgccgtttt gggataacgc
    55561 agcagataag tcgtaatggc tgcaaccaac gtcgcctgcg ccagtgacgg agaacaggtc
    55621 agccgaagta aacccgcagg ctccttcctg cctttggctg gcatatcgag tttgtgcgat
    55681 acagccaaca actcacggca atgctgcaac accgtttcgc cctcatgggt caggctcagt
    55741 tgccgggtac tgcggtgcaa taatcgagcc tcagcccagc gctccatttc agccagatac
    55801 cgggtcacca tcgcacggga catctccagc gcgtcggctg ccccagtcag gctaccttgt
    55861 tcggtgatag tgacaaatac ctgagcggcg gtaattctat ccattatttg tccgatttat
    55921 gcaacaaaga cgaccgaaag tgaggatttt tctttataaa aatgaaattt atcatgacat
    55981 cctctcattc aggaaggagt attccccatg ttaaaacgca ccctgcttgc cacgctgtta
    56041 gcatctatgg cattttccgc ttccgcagca ttaaaaatgg aagtctataa ccccggagca
    56101 aaatccctct tcccggtgtc gtctgaaatc atcaccgggg aacatgacgc cttactcatt
    56161 gatgcccagt tccagcgtaa cgacgccgag aatctggtgg caaaaatccg cgctactgga
    56221 aaaaaactga agactatcta catcagccat catgacccgg atttctattt tggtctggat
    56281 gtattgaagg ccgccttccc tgatgcgcag attgtagcca caccacaaac tatcgcggcc
    56341 atcaacgcga ctaaagacaa gaaaatcgcc tactggggcc ccatactgaa agaaaatgca
    56401 ccgaaacagg tcatcactcc tcagccgcta aacaccgttc acctgacact cgaaggcagc
    56461 gacatcgata tcatggggct gaaaggggca acgccggaca gaacctttgt ctggatcccg
    56521 tcactaaaag ccgttgtcgg cggcgtgcaa acctcagcca atatccatgt gtgggtcgcg
    56581 gatacccaaa ctaccgcctc acgtcaggcg tggttgagcg atctggatgc tatcgataag
    56641 ctcaacccaa ccacggtagt acccggtcac tacctgccta acaaggatgg ctcatcaccc
    56701 tggtcactgc agaatgtgag ttttacccgg gattacctga aaaccttcga gaagaacatt
    56761 ccgttatcgg cgaatagcac tgcactggtt aagtcgatgg aactcgctta cccggatctc
    56821 ggtgaagccg cctcgctgga actgagcgct aaggtcatca aaggcgaaat gcagtggcct
    56881 taatattcac cggataatat ctgcggttgc cgcgacacgg tccaccgtga tgcctggcgg
    56941 tggggacttt tctttcaggt ttgcgatctg tgatcgcaga accggaagga taaaatgaca
    57001 ccaccgcctg ctaactctca ggaaatagac aataattaag acagagcgtc acacaggtag
    57061 tcatagcagg ccactctggc aattgctcgg gaaggtttgt ggcgcgataa ccagtctctt
    57121 tccctttgct gatgtgcccc atccatcggg caacatacgg agcgtatgaa tgaacaggct
    57181 acactacatc ttcgatcctc tgtgcggttg gtgttacgcc gcagcgccgt taatccatgc
    57241 agctcgcaaa attgaagggc tgcctgttgt gctgcacgcc ggtggcatga tgaccggacc
    57301 gaaccggcgg cgcatcacgc cggaatggcg ggattacgtt cagccgcacg atcgtcgcat
    57361 tgcccagatg agcggacagc cattcggtga tggttatttc aatggcctac tgtgggatgt
    57421 taccgcaacg ctggattcgg aaccccctac aacagccatt ctggcagccg aggagctcgg
    57481 tggccgggga attgatttac tcgagcgttt gcaacgcgcc cattatgttg aagggctgtg
    57541 catctccgaa acatcggtac tactgaaaat ggcggtagaa attggtttgc cgctggaata
    57601 ctttgaaaac gcctgcatac actggcgtgg tttacccacc cgtaagcaca ttgaggaaag
    57661 ccgccagtgg ctgacccaat caggcggtgc cggtttcccc accatcgttt tcgcggtaga
    57721 cgatattttt accacgttga acatcgcgcc ctggctgggg cgagcagacg actggcataa
    57781 ctacctgctc aaactggtag aagagaatca gtagcccaca ttcaacccgc tatttcatga
    57841 acaacgctat cagaaacagc gggttgctcc agtccagacg aggcatctaa tttttctttt
    57901 ttcgccgggc atgatatggg atggtagtcc tttcatcaga aaagcacaca gggcgatcta
    57961 atgattcgag ttcatcatct caatacctca cgctcgcagc ggattttatg gcttctggaa
    58021 gagttggatg tgccgtatga agtgatcaat taccagcgta ataaagccac aatgcgcgca
    58081 ccggcctcgt tacgcgatat tcatccgctg gggaaagcac cggtcattga acacgatggc
    58141 aaggttctgg cagagacggg actgattctg gaatatctgg ttgcgacatt tggcccgcat
    58201 ctggcaccgc ccgctgatag cccggatttc
//
