# Supplementary material for: May the Phage be With You? Prophage-Like Elements in the Genomes of Soft Rot Pectobacteriaceae: Pectobacterium spp. and Dickeya spp
Source: Front Microbiol. 2019 Feb 14;10:138. doi: 10.3389/fmicb.2019.00138 (PMC6385640; doi:10.3389/fmicb.2019.00138)
Supplement: Supplementary file 2 [file Data_Sheet_2.ZIP › Supplementary_prophagesGENBANK_files/Genbank FILES _SRP_prophages/phiDze5.gb]

LOCUS       Exported               57252 bp ds-DNA     linear   UNK 02-AUG-2018
DEFINITION  phiDze5.
ACCESSION   .
VERSION     .
KEYWORDS    .
SOURCE      phiDze5
  ORGANISM  phiDze5
REFERENCE   1  (bases 1 to 57252)
  AUTHORS   .
  TITLE     Direct Submission
  JOURNAL   Exported Aug 2, 2018 from SnapGene Viewer 4.2.3
            http://www.snapgene.com
FEATURES             Location/Qualifiers
     source          1..57252
                     /organism="prophage phiDze5"
                     /mol_type="genomic DNA"
                     /note="/genome_id=6666666.356854"
                     /note="/genome_md5="
                     /note="/project=robertczajkowski_6666666"
                     /db_xref="taxon:6666666"
     CDS             61..348
                     /codon_start=1
                     /product="Histidinol-phosphate aminotransferase (EC 
                     2.6.1.9)"
                     /EC_number="2.6.1.9"
                     /label=Histidinol-phosphate aminotransferase
                     /db_xref="SEED:fig|6666666.356854.peg.1"
                     /db_xref="GO:0004400"
                     /translation="MRRNVAELSENRRWLSDSLKTLPNVETVYASESNYLLVRFTDSPA
                     VFKSLWDQGIILRDQNKQPGLAGCLRISIGTRYECERVISALQALLGKTA"
     CDS             363..1430
                     /codon_start=1
                     /product="Histidinol-phosphatase (EC 3.1.3.15) / 
                     Imidazoleglycerol-phosphate dehydratase (EC 4.2.1.19)"
                     /EC_number="4.2.1.19; 3.1.3.15"
                     /label=Histidinol-phosphatase
                     /db_xref="SEED:fig|6666666.356854.peg.2"
                     /db_xref="GO:0004401"
                     /db_xref="GO:0004424"
                     /translation="MGLKYLFIDRDGTLIAEPPEDYQVDRLDKLALEPDVIPSLLTLQK
                     AGFKLVMITNQDGLGTSSFPQEDFDPPHNLMMQIFTSQGIRFERVLICPHFPGDNCDCR
                     KPKTALVDAFLKDNVMDGANSFVIGDRETDVQLAHNMGITGLRYQRDGLNWQAITAQLT
                     KRDRHAHVNRVTRETAIDVNVWLDREGGSKIHTGVGFFDHMLDQIATHGGFRLNIDVKG
                     DLYIDDHHTVEDTGLALGEALNKALGDKRGIGRFGFVLPMDECLARCALDISGRPHLEY
                     KAEFNYQRVGDLSTEMVEHFFRSLSYAMGCTLHLKTKGRNDHHRVESLFKVFGRALRQA
                     IRVEGDTLPSSKGVL"
     CDS             1430..2020
                     /codon_start=1
                     /product="Imidazole glycerol phosphate synthase 
                     amidotransferase subunit (EC 2.4.2.-)"
                     /label=Imidazole glycerol phosphate synthase amidotran
                     /db_xref="SEED:fig|6666666.356854.peg.3"
                     /db_xref="GO:0003824"
                     /translation="MNVVILDTGCANLSSVMYAVKRLGYEPQVSREPEVVLRADKLFLP
                     GVGTAQAAMDQLAERQLIALIKACTQPVLGICLGMQLLGSRSDESGGIDTLGIIDTPVL
                     QMADRGLPLPHMGWNQVTSQAGHRLFRDIPDGSYFYFVHSYAMPVCANTIAQSHYGDAF
                     TAAVQKDNFYGVQFHPERSGAAGAQLLKNFLEM"
     CDS             2027..2764
                     /codon_start=1
                     /product="Phosphoribosylformimino-5-aminoimidazole 
                     carboxamide ribotide isomerase (EC 5.3.1.16)"
                     /EC_number="5.3.1.16"
                     /label=Phosphoribosylformimino-5-aminoimidazole carbox
                     /db_xref="SEED:fig|6666666.356854.peg.4"
                     /db_xref="GO:0003949"
                     /translation="MIIPALDLIDGQVVRLHQGDYGQQRQYGSDPLPRLQDYQQQGAQV
                     LHLVDLTGAKDPAARQIPLLKTLLAGVSVPVQVGGGIRTEHDVEVLLAAGATRVVIGST
                     AVKQPELVQQWFARYGADALILALDVRIDAAGVKNIAISGWQENSGITLEQTVERYLPF
                     GLKHVLCTDISRDGTLQGSNVELYREISARYPLVAFQASGGIGSLSDIAALRDSGVRGV
                     IVGRALLEGKFNVTEAISCWQNG"
     CDS             2746..3522
                     /codon_start=1
                     /product="Imidazole glycerol phosphate synthase cyclase 
                     subunit (EC 4.1.3.-)"
                     /label=Imidazole glycerol phosphate synthase cyclase s
                     /db_xref="SEED:fig|6666666.356854.peg.5"
                     /db_xref="GO:0000105"
                     /translation="MLAKRIIPCLDVRDGQVVKGVQFRNHEIIGDIVPLAQRYAQEGAD
                     ELVFYDITASSDGRVVDKSWVSRVAEVIDIPFCVAGGIKSVEDAGQILSFGADKISINS
                     PALADPALISRLADRYGVQCIVVGIDTWHDAETGRYHVNQYTGDEKRTRVTQWETLDWV
                     QEVQKRGAGEIVLNMMNQDGVRNGYDLTQLRQVRDVCQVPLIASGGAGTMQHFLDAFQD
                     AGVDGALAASVFHKQIINIGELKQFLKQQGVEIRVC"
     CDS             3516..4130
                     /codon_start=1
                     /product="Phosphoribosyl-AMP cyclohydrolase (EC 3.5.4.19) /
                     Phosphoribosyl-ATP pyrophosphatase (EC 3.6.1.31)"
                     /EC_number="3.6.1.31; 3.5.4.19"
                     /label=Phosphoribosyl-AMP cyclohydrolase
                     /db_xref="SEED:fig|6666666.356854.peg.6"
                     /db_xref="GO:0004635"
                     /db_xref="GO:0004636"
                     /translation="MLTEQQQSQLDWQKTDGMMPAIVQHAVSGEVLMLGYMTQDALQVT
                     QETGHVTFYSRTKQRLWTKGESSGHFLNVVSITPDCDNDTLLVLVNPVGPTCHLGNTSC
                     FHPAETQWQFLYQLEQLLAERKHADPTSSYTARLYASGTKRIAQKVGEEGLETALAATV
                     HDREELTNEASDLIYHLLVLLQDQELDLGTIIQRLKERHTK"
     CDS             4344..4994
                     /codon_start=1
                     /product="hypothetical protein"
                     /label=hypothetical protein
                     /db_xref="SEED:fig|6666666.356854.peg.7"
                     /translation="MKFTNSRVKPLSILATTVVLFSQPSQATSSDVENVLKRNGLDNTQ
                     IMTLYRNGELSVKEDTQLHTLTLVNKTVVETPQSTIHNAKYWYHAMPLSEYRTFEANGL
                     TALPCTQQYTDCKLTLEHSYTQKSLSKDKAGVLIQFSTPKEGWLYEDFVTRHHCPVKQE
                     GGGSFILGEKGKAAVASGECDKEYRGMGLGNVFNNYLKQKSVTPIIAYVLLPK"
     CDS             complement(5171..5455)
                     /codon_start=1
                     /product="Integration host factor beta subunit"
                     /label=Integration host factor beta subunit
                     /db_xref="SEED:fig|6666666.356854.peg.8"
                     /db_xref="GO:0003677"
                     /translation="MTKSELIERLAGQQSHIPAKVVEDAVKEMLEQMATTLASGDRIEI
                     RGFGSFSLHYRAPRVGRNPKTGEKVELEGKYVPHFKPGKELRDRANIYG"
     CDS             complement(5545..7254)
                     /codon_start=1
                     /product="SSU ribosomal protein S1p"
                     /label=SSU ribosomal protein S1p
                     /db_xref="SEED:fig|6666666.356854.peg.9"
                     /db_xref="GO:0003723"
                     /translation="MDVKFENPKIINMTESFAQLFEESLKEIETRPGSIVRGVVVAIDK
                     DVVLVDAGLKSESAIPVEQFKNAQGEIEIQVGDEVDVALDAVEDGFGETLLSREKAKRH
                     EAWLMLEKAYEESATVTGVINGKVKGGFTVELNGIRAFLPGSLVDVRPVRDTLHLEGKE
                     LEFKVIKLDQKRNNVVVSRRAVIESENSAERDQLLENLQEGMEVKGIVKNLTDYGAFVD
                     LGGVDGLLHITDMAWKRVKHPSEIVNVGDEITVKVLKFDRERTRVSLGLKQLGEDPWVA
                     IAKRYPEGTKLTGRVTNLTDYGCFVEIEEGVEGLVHVSEMDWTNKNIHPSKVVNVGDVV
                     EVMVLDIDEERRRISLGLKQCKANPWQQFAETHNKGDRVEGKIKSITDFGIFIGLDGGI
                     DGLVHLSDISWNVAGEEAVREYKKGDEIAAVVLQVDAERERISLGVKQLAEDPFNNYLS
                     VNKKGAIVTGKVTAVDAKGATVELADGVEGYLRASEASRDRIEDATLVLNVGDEIEAKY
                     TGVDRKNRVVSLSIRAKDEADEKDAIASVNNKQEEGNFSNAMAEAFKAAKGE"
     CDS             complement(7323..8009)
                     /codon_start=1
                     /product="Cytidylate kinase (EC 2.7.4.25)"
                     /EC_number="2.7.4.25"
                     /label=Cytidylate kinase
                     /db_xref="SEED:fig|6666666.356854.peg.10"
                     /translation="MAVTAPVITVDGPGGAGKGTLCKALANALQWNLLDSGAIYRVLAL
                     AALHHQVDITSEEALVPIASHLDVQFVPEDGQLKVILEGEDVSNEIRTQEVGNTASQAA
                     VFPRVREALLRRQRAFRDAPGLIADGRDMGTVVFPDAPVKIFLDASAEERAKRRMLQLQ
                     AKGFNVNFERLLSEIKERDDRDRNRSVAPLVPAPDALVLDSTHMTLDEVVKQALAYVRQ
                     VLPQLA"
     CDS             complement(8231..9520)
                     /codon_start=1
                     /product="5-Enolpyruvylshikimate-3-phosphate synthase (EC 
                     2.5.1.19) # AroF"
                     /EC_number="2.5.1.19"
                     /label=5-Enolpyruvylshikimate-3-phosphate synthase
                     /db_xref="SEED:fig|6666666.356854.peg.11"
                     /translation="MQESLTLQPISLIDGTINLPGSKSVSNRALLLAALAKGTTRLTNL
                     LDSDDVRHMLNALSALGVEYHLSASRTECDIVGLGGAFTASAPLELFLGNAGTAMRPLA
                     AALCLTDGDIVLTGEPRMKERPIGHLVDALRQGGARIDYLEQENYPPLRLQGGFQGGEI
                     SVDGSVSSQFLTALLMTAPLAAQDTQITIKGDLVSKPYIDITLHMMQTFGITVTNNNYQ
                     TFVVAGNQHYQSPGHYLVEGDASSASYFLAAAAIRGGTVRVTGVGRNSVQGDIRFADVL
                     EKMGAQVRWGDDYIECQRGELHAIDMDMNHIPDAAMTIATAALFAEGGTTTLRNIYNWR
                     VKETDRLAAMATELRKVGAEVEEGHDYIRITPPKQLKAAEIGTYNDHRMAMCFSLVALS
                     DTPVTILDPKCTAKTFPDYFQQLERLSQHG"
     CDS             complement(9630..10715)
                     /codon_start=1
                     /product="Phosphoserine aminotransferase (EC 2.6.1.52)"
                     /EC_number="2.6.1.52"
                     /label=Phosphoserine aminotransferase
                     /db_xref="SEED:fig|6666666.356854.peg.12"
                     /db_xref="GO:0004648"
                     /translation="MTQVFNFSAGPAMLPVEVLRRAEQELCNWHGLGTSVMEISHRSKE
                     FMQVASESEQDLRDLLKIPSNYKVLFCHGGARAQFAAVPLNLLGEKTHADYIDGGYWAH
                     SAVKEAEKYLTPTVIDVKTRADGLRGVKPMSEWVLSDDAAYVHYCPNETIDGLAIEEEP
                     DFGDKIVVADYSSSILSRPLDVSRYGVIYAGAQKNVGPAGLTLVIVRDDLLGKARRELP
                     SILDYKILADNDSMFNTPPTFAWYLSGMVFKWLKEQGGLLEMEKRNQAKADLLYSAIDG
                     SDFYRNDVVPGSRSRMNVPFQLADAALDPVFLQEAQAAGLHALKGHRVVGGMRASIYNA
                     MPLSGVKALTEFMADFERRHG"
     CDS             10980..12743
                     /codon_start=1
                     /product="hypothetical protein"
                     /label=hypothetical protein
                     /db_xref="SEED:fig|6666666.356854.peg.13"
                     /translation="MTQTFIPGKDAALEDSIARFQQQLLDLGFNIEEASWLNPVPNVWS
                     VHIRDRDCALCFTNGKGATRKAALASALGEYFERLSTNYFFADFYLGQHIAEGDFVHYP
                     DEKWFPLPEDDSLPEGILDARLHAFYDPEQQLVASDLIDLQSGNHDRGICALPFTRQSD
                     QQTVYIPMNIIGNLYVSNGMSAGNTRNEARVQGLSEVFERYVKNRIIAESISLPSIPAE
                     VLSRYPGVVEAIATLEQEGFPIFAYDASLGGQYPVICVVLFNPANGTCFASFGAHPDFG
                     VALERTVTELLQGRGLKDLDVFTPPTFDNEEVAEHTNLETHFIDSSGLISWDLFKTQSD
                     YDFADWNFSGTTEQEFATLMAIFNKEDKEVYIADYEHLSVYACRILVPGMSDIYPAEDL
                     LLANNSMGAHLRETLLSLPDSQWEKEDYLALLQQLDDEGLDDFTRVRELLGIATGKDNG
                     WFTLRIGELKSMLALAGGDLEQALSWAEWSLDFNQSVFSAARGNYYRCLQTLLQLALEP
                     ERDPAQYYDAFVRMYGQDAVDAASAAIAGEQCFYGLFTVDADLKALPAHQSLLAAYEKL
                     QRAKRAHWQVK"
     CDS             complement(13156..13314)
                     /codon_start=1
                     /product="hypothetical protein"
                     /label=hypothetical protein
                     /db_xref="SEED:fig|6666666.356854.peg.14"
                     /translation="MTWIIPLEFIRLIRRRFLGDFTYILLFFMLKIFLKIIKTVELWVE
                     ISPYDVK"
     CDS             13376..14233
                     /codon_start=1
                     /product="Formate efflux transporter (TC 2.A.44 family)"
                     /label=Formate efflux transporter
                     /db_xref="SEED:fig|6666666.356854.peg.15"
                     /db_xref="GO:0005215"
                     /db_xref="GO:0006810"
                     /db_xref="GO:0016020"
                     /translation="MKADNPFTLLLPPAMAKVAEDAGVYKATKQPLTTFFLAITAGVFI
                     SIAFVFYITATTGSSSMPYGMAKLVGGICFSLGLMLVVVCGADLFTSTVLIVIAKASGR
                     ITWKQLGLNWLNVYVGNLIGALFFVALMWFSGEHMVANGAWGLNVLQTANHKLEHTFVE
                     ALCLGILANLMVCLAVWMSYSGRTLTDKMLAMILPVAMFVASGFEHSIANMFMIPMGIV
                     VKNFAPETFWHAISMTPGQFEHLTISNFIVDNLIPVTIGNIIGGGLLVGLTYWVIYLRG
                     GDQH"
     CDS             14290..16572
                     /codon_start=1
                     /product="Pyruvate formate-lyase (EC 2.3.1.54)"
                     /EC_number="2.3.1.54"
                     /label=Pyruvate formate-lyase
                     /db_xref="SEED:fig|6666666.356854.peg.16"
                     /db_xref="GO:0008861"
                     /translation="MTELNQKLAQAWEGFSKGEWQNGVNVRDFIQKNYTPYEGDEAFLA
                     GATQATSSLWDKVMEGIKQENRTHAPVDFDTDVAATITSHDAGYINKNLEKIVGLQTDA
                     PLKRAIIPFGGIKMVEGSCEVYGRKLDPQLKKIFTDYRKTHNQGVFDVYTPDILRCRKS
                     GVLTGLPDAYGRGRIIGDYRRVALYGIDYLMADKFAQFTSLQSKLENGEDLEATIRLRE
                     EIADQHRALGQIKEMAAKYGCDISGPATNAQEAVQWTYFGYLAAVKSQNGAAMSFGRVS
                     TFLDVYIERDLKAGKITEQEAQELVDHLVMKLRMVRFLRTPEYDELFSGDPIWATESLA
                     GMGLDGRTLVTKNSFRFLNTLYTMGPSPEPNMTILWSEKLPLNFKKFAAKVSIDTSSLQ
                     YENDDLMRPDFNNDDYAIACCVSPMVVGKQMQFFGARANLAKTMLYAINGGVDEKLKMQ
                     VGPKSEPIKSDVLNFDEVMERMDHFMDWLAKQYVTALNIIHYMHDKYSYEASLMALHDR
                     DVFRTMACGIAGLSVAADSLSAIKYAKVKPVRDESGLAVDFNIEGEYPQFGNNDPRVDD
                     LACDLVERFMKKIQKLNTYRGATPTQSVLTITSNVVYGKKTGNTPDGRRAGAPFGPGAN
                     PMHGRDQKGAVASLTSVAKLPFAYAKDGISYTFSIVPNALGKDDDVRKTNLAGLMDGYF
                     HHEASIEGGQHLNVNVMNREMLLDAMENPEKYPQLTIRVSGYAVRFNSLTKEQQQDVIT
                     RTFTQSM"
     CDS             16657..16800
                     /codon_start=1
                     /product="hypothetical protein"
                     /label=hypothetical protein
                     /db_xref="SEED:fig|6666666.356854.peg.17"
                     /translation="MGRLAALKISSGNFFTTPAEINQNLFCQPALIGWQADKTDSTPNT
                     VV"
     CDS             17273..17470
                     /codon_start=1
                     /product="hypothetical protein"
                     /label=hypothetical protein
                     /db_xref="SEED:fig|6666666.356854.peg.18"
                     /translation="MGVCTPLWFEAKKTAYLNKIKEIHVLNRNSRSGFIFESPKSSCEE
                     VGKAKGDGGKIVIAAHTHSK"
     CDS             17759..18004
                     /codon_start=1
                     /product="Phage protein"
                     /label=Phage protein
                     /db_xref="SEED:fig|6666666.356854.peg.19"
                     /translation="MYKYKMVQIPPNIIVNARKVDKDNAAAHYLEQVVNEKAEDGWEFQ
                     RIDTIGVEEQPGCASLLFGKKNGPVNYYVITFRKEA"
     CDS             complement(18265..18486)
                     /codon_start=1
                     /product="hypothetical protein"
                     /label=hypothetical protein
                     /db_xref="SEED:fig|6666666.356854.peg.20"
                     /translation="MARTRTSRRLSDITIRQYHQCQNLECSETFTTLNTVERRVSKRTR
                     EDPLPPGFIPQDAFPASHYGRDQLNLAL"
     CDS             complement(18550..19689)
                     /codon_start=1
                     /product="Gene D protein"
                     /label=Gene D protein
                     /db_xref="SEED:fig|6666666.356854.peg.21"
                     /translation="MAITDLADSLITTAKRYDDALTEAVKSPAFSITLGGKSLKELSDR
                     LISLSLTDNRGFEADQLTLSIDDSDGRVELPPRGAQIALSIGWQGEALTYKGLYTVDEI
                     SHEGPPDVLGVTARSADFREEFNVKREVSWHDVTVERVVSAIAHRYGMKAQISDMLMNI
                     DIDHADQTEESDMSFLTRMAEQLGAIATIKNGTLLFILPGGGVTASGKALPSASITRSS
                     GDGHRFRIADRDAYTGVRAYWLDLKFGKKKKVSVKRRRTKPKPKKEKSSSREGDYITGA
                     EGNVFVLRKTYQNEEVARRAAAAKWQQLQRGAAEFSITLARGRAELYPEMHLTVSGFKP
                     DIDNQDWIIARVEHVIDGNGFTTRLELEAKIPDWIAESE"
     CDS             19830..21020
                     /codon_start=1
                     /product="Major tail sheath protein"
                     /label=Major tail sheath protein
                     /db_xref="SEED:fig|6666666.356854.peg.22"
                     /translation="MVANMSETRFHGVRVRENTDLVTAINDIDSSVIGVVAVAEDADAD
                     TFPLNTPVLITRVNSVLGKAGKTGSLYKTLKAISDQTSPKVIVVRVAAATEGGDKTQSQ
                     LIIGGTAADGSYTGMYALLTAEAKVNYRPRILAVPDYDTAEVTSALCVIAQNLRAFVYA
                     GCHGCTTMAEAITYRAQFAYRELMLIWPDFIAYNPLSGSNETFPASAYACGLRAAIDND
                     QGWHKSLSNVAVNNVLGISRDVFWSLQAEDSDANELNNQEITTLIKRNGFRFWGNRTTD
                     THDYLFEVYTRTAQILADSIAEAQFEAVDEPLTPANVKDVVNGINGKLSALVTAGRLIG
                     GECWFDIQDNPTTGLRQGQVRVRYKYTPVPPLEDLTLYQTFTDDYFDSAFSSLGGV"
     CDS             21021..21536
                     /codon_start=1
                     /product="Major tail tube protein"
                     /label=Major tail tube protein
                     /db_xref="SEED:fig|6666666.356854.peg.23"
                     /translation="MAVPHKLRLFTCFVNGNNQIGKVTSVTLPKLTRKTEDFQGAGMIG
                     SVAVDLGMDSGALEAQMVVGGMEKKLLLEYGGDIDDVRLRFAGEYYTDGDSQLVEVEMR
                     GRITEIDGGESKQGEDTSVTYALKNTYYKLSIDDQSVLEIDLLNFIYKKNGKNIYPDRI
                     TSALGLGN"
     CDS             21549..21899
                     /codon_start=1
                     /product="putative phage tail protein"
                     /label=putative phage tail protein
                     /db_xref="SEED:fig|6666666.356854.peg.24"
                     /translation="MAATSRPEPVTMNTPNEHTVTLATPIVRGDNAISQVSITDDIKQA
                     GSLRGLRLVNVLNMDVDSITTLLTRVTSPKLKLAEINAMDTRDFMRLAEAITPFLVHAE
                     PGEPNAEATEEA"
     CDS             21905..22063
                     /codon_start=1
                     /product="hypothetical protein"
                     /label=hypothetical protein
                     /db_xref="SEED:fig|6666666.356854.peg.25"
                     /translation="MQFDQIDDLVADIAVVFNWPPSELFSMDLGDVIAWRARAAIRSGA
                     SEADEKP"
     CDS             22050..25022
                     /codon_start=1
                     /product="Phage protein"
                     /label=Phage protein
                     /db_xref="SEED:fig|6666666.356854.peg.26"
                     /translation="MKSLDIRVAFSAIDRLTRPVNAARQSAGGLSESLKRTQAAIKDLD
                     NQSRTFNRLRDSVQKTSRKIDEASRSLDGLKKAQQNNAVLTDKQREHMAALAAKLERLN
                     ITRDQEMVKLRAVSQALRGHGVSLVGSNATIQSAIRRTEQYNQTLERERRQLAAVTQAR
                     ARYERMQQTAGKLRGSGVMAVAGGAAAGYAGGQFLAPAVGFDEEMSRVQALTRLDKGDQ
                     QLAALRAQAKKLGAETAFTTRDAASGQAFLAMAGFTPQAIQAALPGVLNMALAGGMELG
                     ETADIGSNILSQFNLDASQMDRVSDVLTGAFTRTNTDLFSLGETMKYTGPVAAKLGISL
                     EDAAAMAGMLANNGIRGSDAGTAMRASLARLASPPKAAAEALKELGVSVADAKGKMRPM
                     QDVLRDLYKATKKYGQVDQVSFFKDIAGEEAFVGLQTLVQAAGSGALGKLSGELKKAKG
                     EADAVAKKMADNLGGDLKNLDSAWEGFRIQVEETTDRPLRSLTQGLSDVITNVSGWVRE
                     NPRLTQTLLLAVGGAAAFAVAIGGTSLAIGLLMGPLAKLQLGFSLLLGARGVGGAVSMF
                     SGLSSLLGGPMARMGGWLQLFSGSTGRLTATLTPLRGMLLAVFTSPVSALGSLVRGVGG
                     LLLRLSGLPVLWSLITGAVSVLGGVLSLLLSPIGLIGAAFVAAGLLIWRFWEPIRTFFS
                     GMFTGIVISLGPIRQAFTSLSPVFDVIVSAVSRLWDRFTQLFQPIQTTKKTLDDCAIAG
                     YGFGKVLGSALDMLLLPLQKLMEGIGWILEKLGLIPSGLDAAQKKADQLKELTPEGKDR
                     LQGLVANLTGDLKGATTAPPPASKPPLTGDSGTQRRLQKIADNTGGVLEETKKRIGPGD
                     IVFKNLPKALAVRGEWQESRLTGSTPSAPPQPAQTMQALSDRPAVVAATQPVKQADASP
                     VSRPAARTPAAGGFNGEIHIHLHGVERQDARELGRIVADAVSAELARRDRLQRGSFRDR
                     E"
     CDS             25035..25544
                     /codon_start=1
                     /product="Phage tail protein"
                     /label=Phage tail protein
                     /db_xref="SEED:fig|6666666.356854.peg.27"
                     /translation="MMMVYGLFVFELQTLPYQQLQQSRAWRHVKNERINRSAKFQYIGA
                     GEDQITLSGVLYPEITGGEVSLTALTTQAYSGRPWPLIDGTGQIYGMYVLTGMQTTRTE
                     LNRYGKAKKIEFSLSFQRCDEDLREKLQSSSFSDLMDNARSSANKAMNTVSTAMTDTVN
                     TLKGLV"
     CDS             complement(25573..26181)
                     /codon_start=1
                     /product="Tail fiber assembly protein"
                     /label=Tail fiber assembly protein
                     /db_xref="SEED:fig|6666666.356854.peg.28"
                     /translation="MAEKIITELDENGLAVDAGWITVYHADHVTREYTGKGVEFLMRGT
                     GIPADSYTDVPPPAVEGQAVCRRADGGAWEAVEDHRGKTAYRTADGKPQTVTALGELHD
                     GLTLLTPATAFDRWDGNAWVTDVAAQHAAEVAAAQQEQAARKTAATARITELGYAADLG
                     MATDAEQTALTAWKTYLVQLSRLDTSAAPDIDWPETPST"
     CDS             complement(26183..27298)
                     /codon_start=1
                     /product="Tail fiber protein"
                     /label=Tail fiber protein
                     /db_xref="SEED:fig|6666666.356854.peg.29"
                     /translation="MTTKYYAIMTNTGAALLANATALGRQLSITQMALGDGGGTLPTPD
                     TAQTKLVNERRRAPLNSLSVDPANPSQIIAEQVIPEDEGGWWIREIGLYDANGNLIAVA
                     NCPETYKPKLQEGSGRVQTVRMILIVSSTDAVTLKIDPSVVLATRSFVDGKFSNAVLTG
                     TPTAPTAAVGTGTTQIATTAFVQTAISTRVNELAGSVPDALNTLEKLAKSLGDDPNFAR
                     TVSVSIGHKLDITEIAGIPLPWPQAIAPTGWLKCNGQAFDKTLYPKLAALYPSGTLPDL
                     RGEFIRGWDDGRGVDSERTLLSAQAATWIQPNIENNTAATTIRIDNVDSTFNADEYAAV
                     SNLPAYEHNGSRARSYVRPRNVAFNYIVRAA"
     CDS             complement(27295..27864)
                     /codon_start=1
                     /product="Tail protein I"
                     /label=Tail protein I
                     /db_xref="SEED:fig|6666666.356854.peg.30"
                     /translation="MRNVASSTQRLSEIAVCLDTLWSAERCPAQLLPYLAWALSVDRWD
                     KRWSEQTKRQVIKAAWLVHRQKGTLAALRRVVEPFGYLIRVTEWWQTGGQPGTFRLDIG
                     VQDAGITEETYLELERLIADAKPVSRHLLGLNIVMDCAGTIPLAAGQYSGDALTVYPYV
                     PETITTTGIDVRGAVVHLSDNMSVSA"
     CDS             complement(27896..28792)
                     /codon_start=1
                     /product="Phage baseplate assembly protein J"
                     /label=Phage baseplate assembly protein J
                     /db_xref="SEED:fig|6666666.356854.peg.31"
                     /translation="MATVDLSQLPQPQIIEVLDFEVILQDVKAVMISAFPAAQQSSVTA
                     ALSLESEPLTVIAQVIAYREMMLRQRINEGAEACLLSHAVSSDLDNLAANLNTQRLTIT
                     EATDTADAVMEADSALRLRAQAAFEGLSVAGPTGAYEYFAKSASGKVADAKAISPSPAV
                     VVVSVLSTEGDGSASADLLAAVDAALSADDKRPVGDRLTVQSAGIVRYAITAVLYRYPG
                     PESEPIQQAAQQALTSWLGTQGRIGRDVARSAIMAALHVQGVQRVELLEPAQDIVISDT
                     QAAYCTGFTVTEGGSDE"
     CDS             complement(28779..29147)
                     /codon_start=1
                     /product="Phage baseplate assembly protein"
                     /label=Phage baseplate assembly protein
                     /db_xref="SEED:fig|6666666.356854.peg.32"
                     /translation="MTATYTGMNPHGTGTLTDADQLWQSVRDILTTPLASRVMRRDYGS
                     LIPDLLDAPQNAVTRLQLMSAAVIALTRWEPRISLNAVDIRYSASGAVEAELSGLITET
                     MQAANSTLTLRSHGDGDG"
     CDS             complement(29144..29725)
                     /codon_start=1
                     /product="Phage baseplate assembly protein V"
                     /label=Phage baseplate assembly protein V
                     /db_xref="SEED:fig|6666666.356854.peg.33"
                     /translation="MSAELMRLLENLLRVGVVTAVDPESWRVRVKSGELLTDWLRWNTT
                     RAGAFNVWFPPAVGEQVLLGCLGGNPETAVIIGSLFSEAHPAPGNSLKEIVITAPDGAR
                     FRYDAVAGALEATGMKTANVVAAVSVTLNTPVVECTQHLKARTVEITHGGTLAGNVAHS
                     GGAMTSNGVQVDSHRHGGIQPGGSWTSGTQ"
     CDS             complement(29722..30360)
                     /codon_start=1
                     /product="Phage tail completion protein"
                     /label=Phage tail completion protein
                     /db_xref="SEED:fig|6666666.356854.peg.34"
                     /translation="MTDKLFHALDQVFDDILSGLSPAGRLKTARQVGQALRRSQQQRIR
                     AQRNPDGSAYATRRRKVLRSQKGMVFVWEGQVRHLKNWHGGRGKHGRTITGFDEDRNAI
                     RTFYRSDIERYIEINTQAVRRTTSKTTPMFQRLRGYRFLKMQADTDGASVGFDGIAARI
                     ARVHQYGERDKVGPGAFARYPVRELLGISLADERLIHETVINSLGSAAT"
     CDS             complement(30357..30815)
                     /codon_start=1
                     /product="Phage tail protein # FIG072132 and FIG003673"
                     /label=Phage tail protein # FIG072132 and FIG003673
                     /db_xref="SEED:fig|6666666.356854.peg.35"
                     /translation="MLKTDSLRDALTASNTWCRANPEAFTVFVEEGGIETTGETPSFLY
                     RYSLVLFVMNFTGDIDDFTLPLMAWLWQNQPDLLLNPQKNREVKFTTLINNDDSADILF
                     EIPVRERVKVTRDDNGILRAEHLPEPRPRLTGGVWDAVLDDATGETAT"
     CDS             complement(30826..30960)
                     /codon_start=1
                     /product="hypothetical protein"
                     /label=hypothetical protein
                     /db_xref="SEED:fig|6666666.356854.peg.36"
                     /translation="MTWGAVALWSDQLLDALDTCNADKAAINDVYLRRLQRLKDAATP"
     CDS             complement(30929..31366)
                     /codon_start=1
                     /product="hypothetical protein"
                     /label=hypothetical protein
                     /db_xref="SEED:fig|6666666.356854.peg.37"
                     /translation="MKLTAPLAVLLVLAVGGVLWQTYQRGIDRAHTEALTDSAQQQREL
                     LNEVRALADDARNVLAQVREREQQRYAEGEERREKMREGMQPDTCANTVVPVAVSDSLQ
                     KRAAAVQRADTARPGTAQPDGPHTDARTENTGDLGRGRALE"
     CDS             complement(31363..31908)
                     /codon_start=1
                     /product="Phage lysin (EC 3.2.1.17) # Phage lysozyme or 
                     muramidase (EC 3.2.1.17)"
                     /EC_number="3.2.1.17"
                     /label=Phage lysin
                     /db_xref="SEED:fig|6666666.356854.peg.38"
                     /translation="MKTAIKRCSIALIVALGITLSPGTLRTSPEAQQKTASWEDCRASP
                     YYCPAGVLTVGIGSTGNVQNRPYSNDEIARRWVNDMQRAENCVNGNFNGAAMPQSAFEA
                     MTDTAFNLGCSGLMWFTNRQGSKQRTTIWKHAQAQEWPAMCERLTDFVNSGGQRSAGLV
                     NRRSDFKAWCLRDLAGVP"
     CDS             complement(31892..32194)
                     /codon_start=1
                     /product="hypothetical protein"
                     /label=hypothetical protein
                     /db_xref="SEED:fig|6666666.356854.peg.39"
                     /translation="MGLNDLQRLNDGVTYGLSVMVTGIGVMTVSEKVALAGLVIGVVTA
                     WRAWLFRRRIERAQRRRNELIEQILQQSERRTLNTSERRAVAILHQGDVDDENRD"
     CDS             complement(32185..32385)
                     /codon_start=1
                     /product="Phage tail completion protein"
                     /label=Phage tail completion protein
                     /db_xref="SEED:fig|6666666.356854.peg.40"
                     /translation="MVVWALQGDTVDLLCYRHYGTSAGVTEQVIAANPGLSRQMFLTAG
                     QAITLPDIPRQTEQETVQLWD"
     CDS             complement(32385..32876)
                     /codon_start=1
                     /product="Phage head completion-stabilization protein"
                     /label=Phage head completion-stabilization protein
                     /db_xref="SEED:fig|6666666.356854.peg.41"
                     /translation="MSLVAQKRVSDSGDVPEIDDGTATVSAGEFWPVIVLRDLRLAARI
                     TGGITTTRLMHVTTEAVVHVTDQLASWQQTQQATGYAALADVPARQVNDESIKVYRFRR
                     AVYAIARALLLEGYRDVDTTAKGDKAADTFDNQCDDLWRDARWSIADISGAQRLFAELC
                     "
     CDS             complement(32975..33841)
                     /codon_start=1
                     /product="Phage terminase, endonuclease subunit"
                     /label=Phage terminase, endonuclease subunit
                     /db_xref="SEED:fig|6666666.356854.peg.42"
                     /translation="MLTPAQRHFQRVMAERRGQADTETAVSRTAHEQILHRLRLHQAAL
                     KQVQSDATKAEMKKAMLPEYDGWIDGTLEGDSGRQDEVIVTLMVWAIDCQDSALTLRLG
                     RYVVKHGLSLPADKFRRDAVTVLAEEVSNPVLTLATTDADADLSGYTAVLDEVAAIVDG
                     KDMPDEVRAKLCKARAFSRRAAVDAQTKAEALTLFREAMARNPNAGVKREIATLTRELK
                     KLMPGSSNEPEDGTHGDDETTTETPPAASADATQPAVKKTAVRNTTARKTTRPTGKSKA
                     ARQSAKR"
     CDS             complement(33885..34940)
                     /codon_start=1
                     /product="Phage major capsid protein #Fam0066"
                     /label=Phage major capsid protein #Fam0066
                     /db_xref="SEED:fig|6666666.356854.peg.43"
                     /translation="MENTTRNLFDQYISRQAQLNGVQPNAVAMTFSVEPAIQQRMEQAA
                     QESDEFLKQINVFGVKDQEGQKILIGSKGPIASTNNSSDGTSRRNPTDNHSKEPNDYHC
                     RKVNYDSAVSYPQLDVWASQPNFQALISQANARQIGLDRIMIGFNGTTYAEKSNRSANP
                     LLQDCGVGWLQKIRNDAGHRIIKNVTLTARDEDNKIVTKGTYGNLDTAVFDAKNSLLDP
                     WHRRAPDLVVIMASDLLTSSNFPRLNALSQSNPNTELLAGQLIVSQERVGGLPTFLAPY
                     FPSNAVLITSFKNLSVYYLLGALRRSIVEEPEYNRVATYQSSNDDFVVEDYGKVALIDG
                     IQFAQAAGDGQ"
     CDS             complement(34966..35805)
                     /codon_start=1
                     /product="Phage capsid scaffolding protein # Fam Scf032"
                     /label=Phage capsid scaffolding protein # Fam Scf032
                     /db_xref="SEED:fig|6666666.356854.peg.44"
                     /translation="MSGTAKPTRKKFRVAVSGSTVDGREIGRDHLYAMAESYNPQVYGA
                     RVNVEHILSPYPGSDFSAMGDVIALSAEDITDGPLKGRAALYAEIEPTERMKQLTGEGK
                     KIYSSIEIDPQFAATGKPYLRGLAMTDTPASLGTDRLKFAAQQRAQVQAFNNLPGEPVM
                     FTEAMEAELVELSEQRSDEGKQWFSRVMGIIGKGRKSDSEQFNQVREAVENVAQSHADL
                     LDSFNTLKTQQQQDSRTIQTLTSELAALTQKLATQDNSYSQRPAASGGNSGAQLADF"
     CDS             35964..37691
                     /codon_start=1
                     /product="Terminase, ATPase subunit"
                     /label=Terminase, ATPase subunit
                     /db_xref="SEED:fig|6666666.356854.peg.45"
                     /translation="MIQDAFVRQRAKQLYWQGYPPAEISRLMGINQNTVYAWKKRDEWD
                     ETPPIQRVTHSIDARLCQLAQKPTKTGGDLKEMDALTRQLKTLNDGQPGNAAGGKKPRQ
                     RKVKNHFSDEQIAALRTNILDSLAWHQNGWYEQRHHRNRMILKSRQIGATWYFAREALL
                     RALRDDVAYPYQRHQIFLSASRRQAHQFRGFIQKVAEEVDVELKGGDKIVLSNGAELHF
                     LGTSAATAQSYTGNLYFDEFFWVSNFANLRKVAGAMATLKGLTRTYFSTPSSETHEAYP
                     FWTGARWNEKRSKAQKVAFDVSWKALNSGLLCPDKTWRQIVTLQDVIDHGWEYTDLEEI
                     RDENSPDEYNNLYGCEFVRDGESAFNLNLLFSCGADGYDEWPDWKPFASRPMADRGVWV
                     GYDANGSSGNGDSGAISVVVPPLVVGGKFRTIETQQIRGLEFEEQAKVIEALTFKYNVQ
                     HIAIDGTGIGEAVYQIVKKFFPAAVCFLMSVSSKRALVLKMLQVIRAGRWEYDRSEQAL
                     INAFNAVRRVKTPGGIMTYDTDRARGSNHGDLAWATMLAVINEPLGQEQGGGGFAMEF"
     CDS             37691..38743
                     /codon_start=1
                     /product="Phage-related capsid packaging protein"
                     /label=Phage-related capsid packaging protein
                     /db_xref="SEED:fig|6666666.356854.peg.46"
                     /translation="MKRKDKPGARPAMTAGQPDMAAALKSDPGLSAFTFDGPYPVRDGH
                     DLLDNMYCADNGRYYDTPVDWYGLARAFGSASWHQSALYFKRNALTGCFIPHPLLSRQA
                     FSAFVLDWFVFGNGYLERRVNRLGGVLALRHVPAKYTRRGSDLNTYWFIRQWKDEHTFD
                     TDSVCHVINPDIHQEIYGMPEYMGALLSASLSHSADMFRKLYYDNGSHAGCIIYIGASQ
                     VDTESMDNVKKTLKEARGKGAFKNLLLHAPGGGEKGVQIIPFSQISAKDEFLNIKSVTR
                     DDILAAHRVPPQLMGAMPEGNGSFGDVEKAARVFAINELMPVMEALKHVNDWLGMEVIR
                     FNPYALLKAE"
     CDS             39137..39250
                     /codon_start=1
                     /product="hypothetical protein"
                     /label=hypothetical protein
                     /db_xref="SEED:fig|6666666.356854.peg.47"
                     /translation="MRRIWGKKNLPKQVSEKVSEWMKSALMLPEQGTLSGS"
     CDS             complement(39391..41169)
                     /codon_start=1
                     /product="Retron-type RNA-directed DNA polymerase (EC 
                     2.7.7.49)"
                     /EC_number="2.7.7.49"
                     /label=Retron-type RNA-directed DNA polymerase
                     /db_xref="SEED:fig|6666666.356854.peg.48"
                     /translation="MPIAPQLTIVKNKTKTMSKNNKLSELKSAKNITDLAKIISVPRQS
                     ITYVLYGINRLNLAKYHTFKIPKKDGSERTINAPVKELKDIQKKVSSLLQECFRIVCIL
                     EGHRNHLKKINSLSHGFIKGKSIITNATPHKNKRFVLNVDLKDFFGQIHYGRVYGFFKN
                     NKHFQLSDEVAKVLANITCYQQGLPQGAPTSPVISNLIAGILDIKLASLAKKYSCYYTR
                     YADDLTFSTNLKEFPPRIASIENGDVRIGSSLEGIIKKCGFDINHKKNRLQFCNSRQDV
                     TGIVVNKKVNVPYDYRNKARVIWHKLKNGKEIYAINSQPEIKKDINYLIGILSHIHNVR
                     REHRVTTKEEYIIPKKPNKKTFDDIFDADSRMYRDVLFFKNFVKNKKPVIVCEGKTDIT
                     YLQCALESQAAKHRSLIIKKELQVSFFRPTKTISELFKVTGGTGDIGNLISNYSSYCDE
                     FNRFSLSQPVIILIDNDSGAPAVRSLVNQITKKNFSSNDSFTHVIKNLYVMQTPLIKGG
                     DSAIEDFFDTATLNEKLEKKTFSYKGTFDTDKHYGKNHFAEYVVKPKRKTIDFTGFNVL
                     LNDIKKIIKDYKAKKH"
     CDS             complement(41485..41844)
                     /codon_start=1
                     /product="HicB-related protein"
                     /label=HicB-related protein
                     /db_xref="SEED:fig|6666666.356854.peg.49"
                     /translation="MSKPSTPNTIEIAGQPAVISYVPELGTFRGKFMGLTGYCDFVSDS
                     IQGLKKEGEISLREYLDDCSAAGIEPYVRQERVKTFTLRYPESFGERLNQAAAEQETSV
                     NAFIIETLNERMKHA"
     CDS             complement(41841..42116)
                     /codon_start=1
                     /product="HicA protein"
                     /label=HicA protein
                     /db_xref="SEED:fig|6666666.356854.peg.50"
                     /translation="MKEQVSSLRKRQRSTLEQVFKSPVQSGIKWADIESLIKALGGEVK
                     EGRGSRCKFLLNGSIANFHRPHPSPDTDKGAVANLRDWLESIGVKP"
     CDS             complement(42210..44693)
                     /codon_start=1
                     /product="Phage replication protein # Replication gene A 
                     protein"
                     /label=Phage replication protein # Replication gene A
                     /db_xref="SEED:fig|6666666.356854.peg.51"
                     /translation="MADLRPSLLVTDAEPHPAVTRHLSRMVKRALAAPGDDRNLNQAVA
                     QLDHREPNGTQLLIRRALAEIGRRDHQETVSGWMKTPEGVEARLHEQPFFIRDVYRQKI
                     EWLRANREPRHISAFFMGTVKKALLRLDAVRAQQGVRDGFASELAAYWGPRWAHLAGFT
                     KHEVINAAHTLAAAIAEMFETECGHTSPENMTDNEIQWLYRHLGRELLALRVTPPCWGL
                     VIGDEQARHRIYSAILRITSPEWWGRKLWRLRCEWRENQFRAIGVIHKKRMPYVSLDAL
                     NQWQEQRRKNRAFFQTHELVDEDGNVTSLENMVYGSISNPAIRRHELMTRMAGVEMVAI
                     ARGDEGVFLTITCPSRYHANIQNGHQNPKWDHASPRQGQRYLCRTWARAMSALNRRGLR
                     PYGFRVAEPHHDATPHWHVLLFMPPADRKAITDILREYFIAEDRAELGRNTGARFKAKK
                     LDPRKGSATAYVAKYISKNIDGYALDGELDNETGKPLRETAKFAMAWASQHNIRQFQPF
                     GLPPVTVWRELRRLANQLTAAQKENGTFKRGAAQLADPAMDAVLASADAGCFATYIEKQ
                     GGVLIPRERYTVRIAYEDADEQNTYGEIPEKIFGVFSPRLGAISRICTRLIKWKIRKKQ
                     SADDGTSIGTGSGLAVTSPTGDAWSSVNNSTGDEKIAIPSGIDGDDYGSCEAPDGEPGD
                     TFARISTDFEHMTDSERRALLSRLRTQPTDRRNNQHSSTTQRTTSAEKQVVGKLPDEWR
                     ASIADFARSIGWDISNIEIQRLALGHTLTFADQLYVSRSDGCLYRVRRERRPEDVAATV
                     SNWIARLRMEGYQEE"
     CDS             complement(45297..46253)
                     /codon_start=1
                     /product="Methyl-directed repair DNA adenine methylase (EC 
                     2.1.1.72)"
                     /EC_number="2.1.1.72"
                     /label=Methyl-directed repair DNA adenine methylase
                     /db_xref="SEED:fig|6666666.356854.peg.52"
                     /db_xref="GO:0009007"
                     /translation="MSIIATPLKWVGSKARVMDILREHLPAGDRLVEPFAGSCSVMMNT
                     DYPEYLIADINPDLINLYQVIKEDVKEFIDTAEGLFRTANTAESYYRFRQVFNRSKENR
                     TTSAALFLYLNRHGYRGVCRYNRAGGFNVPYGHYASPYFPLAEIQAFAEKARRAKFICA
                     AFGETLQLIRPGDVVYCDPPYIPQTPTASFTSYHTDGFTHNDQYDLCSALSRLAERGIP
                     VIASNSDTHHAHSLYHRFDICRFTAPRSVGVAAGESKQAGEIIAKRLPIPAARSLSKVC
                     DGCGYEGGGHCPDCGPVMGDATYQEMVASGALNAEPF"
     CDS             complement(46250..46459)
                     /codon_start=1
                     /product="Phage protein"
                     /label=Phage protein
                     /db_xref="SEED:fig|6666666.356854.peg.53"
                     /translation="MAQEREAFIRETQIQKARQQSGCAVSAFVCESCDAPIPEARREAV
                     PGVRLCVYCQGDAELKNKHYRGAL"
     CDS             complement(46474..46704)
                     /codon_start=1
                     /product="hypothetical protein"
                     /label=hypothetical protein
                     /db_xref="SEED:fig|6666666.356854.peg.54"
                     /translation="MKNAEVKTMTVANDGALVELLKKARLEERKDQHFSFSLRLAALAV
                     RAQQRDLSAAEMVELIRQESERFERSAQELS"
     CDS             complement(46769..47110)
                     /codon_start=1
                     /product="Phage protein"
                     /label=Phage protein
                     /db_xref="SEED:fig|6666666.356854.peg.55"
                     /translation="MANTEPARAIPLSIAERTDGLNHIAMLRGKHFKTNSEKEMCRFID
                     DMRDKIDDDYHKNMRVLSAIFELADIDKERHHLKFNELTTDEKERLIKAMNKLRAVVSL
                     FPKNLILPL"
     CDS             complement(47115..47324)
                     /codon_start=1
                     /product="hypothetical protein"
                     /label=hypothetical protein
                     /db_xref="SEED:fig|6666666.356854.peg.56"
                     /translation="MISIARLLTSQSPSPVIPNQGKGWLELPNGQRVKPSVNQVYFAPW
                     SQKPYMPAPKQKRRWFSRLMGIAA"
     CDS             complement(47326..47541)
                     /codon_start=1
                     /product="hypothetical protein"
                     /label=hypothetical protein
                     /db_xref="SEED:fig|6666666.356854.peg.57"
                     /translation="MKNKKSGRQYAITQLSKHTNVYRGFSIIKCPRTTLNPITRYRVSQ
                     AGQSYGLFDALTLATGYIDNLYTARR"
     CDS             complement(47543..47854)
                     /codon_start=1
                     /product="hypothetical protein"
                     /label=hypothetical protein
                     /db_xref="SEED:fig|6666666.356854.peg.58"
                     /translation="MDDSSIVESRRQIRLSEKPADLLSKEGFALYVGKTPAAIVAMAKA
                     GKLPAFYMADPLNPGGHAELWINRREWDSYAAQLVDGAPPEWHGWKDRISANKRARKG"
     CDS             complement(47859..48149)
                     /codon_start=1
                     /product="Cox"
                     /label=Cox
                     /db_xref="SEED:fig|6666666.356854.peg.59"
                     /translation="MGERVYEVRYPVDAVPYPKFAELIGKSEAAVKAMVDKGKLPLVPW
                     VNPEKSNPSRAENWVYIPEFNRAMREAFMNRPEEQRDAWLLWLGLRPEGGK"
     CDS             48296..48529
                     /codon_start=1
                     /product="hypothetical protein"
                     /label=hypothetical protein
                     /db_xref="SEED:fig|6666666.356854.peg.60"
                     /translation="MSDNVFITKETNEIIKAALTGDNFNNLLIIVANQLPLRNGAVRDH
                     YSVRYDEFYSAIHDMVKQSLNYKPTDTESGTN"
     CDS             complement(48488..48898)
                     /codon_start=1
                     /product="hypothetical protein"
                     /label=hypothetical protein
                     /db_xref="SEED:fig|6666666.356854.peg.61"
                     /translation="MEGENKTQPRIIRGDFNDQELVIFLKGLAEKLETREYLKKRPEEL
                     RAKIDAVEAELARMSSDVDLFVVDYSEVAEKRNEHGDKSRGANSEELLSIAESAIKEMK
                     KAASDKGLDISRQEVQLIRLIRTALGISGLIV"
     CDS             49201..49353
                     /codon_start=1
                     /product="Phage immunity"
                     /label=Phage immunity
                     /db_xref="SEED:fig|6666666.356854.peg.62"
                     /translation="MKITMHPRFQKYTLWLMTDKTAPEAGQIAPALAHIGQDETKSHQS
                     NQNVG"
     CDS             49420..50406
                     /codon_start=1
                     /product="Phage integrase"
                     /label=Phage integrase
                     /db_xref="SEED:fig|6666666.356854.peg.63"
                     /translation="MAIKKLDDGRYEVDVRPQGAEGKRIRRKFNTKGEAQIFERHILVN
                     YHNKDWIEKPADRRKLSELLALWWVYHGKSHARGEIEHGRLKTIIATFEEMGVSQADQL
                     TKKAIMDYRVNMLNNGLKASSVNRHHAILSGMFTKLIDAEEYHCPNPFKDVKPLKESLT
                     EMAFLTASEIPELLRLLEGDELDAVLVCLATGGRWSEVANLKSEHIINNMVTFMKTKNG
                     KRRTIPISQELTNRLKRVKSGYVFRPNYRKVRNTLRAMKPDLPEGQALHVFRHTFATHF
                     MMNGGNIVTLQRILGHSTIQQTMVYAHFAPDFLQDAVTLNPLNGVSI"
     CDS             50597..51244
                     /codon_start=1
                     /product="Pyruvate formate-lyase activating enzyme (EC 
                     1.97.1.4)"
                     /EC_number="1.97.1.4"
                     /label=Pyruvate formate-lyase activating enzyme
                     /db_xref="SEED:fig|6666666.356854.peg.64"
                     /db_xref="GO:0043365"
                     /translation="MRCLYCHNRDTWDTHGGKEITVEELMKEVVTYRHFMNASGGGVTA
                     SGGEAILQAEFVRDWFRACHEQGINTCLDTNGFVRRYDPVIDELLDATDLVMLDLKQLN
                     DEIHQNLVGVSNHRTLDFARYLAKRNQRTWIRYVVVPGWSDDDASAHLLGEFTQGMSNI
                     EKIELLPYHELGKHKWTAMGEEYKLDGVKPPKADTMDRVKSILTSYGHKVVY"
     CDS             51775..52704
                     /codon_start=1
                     /product="Transcriptional regulator, LysR family"
                     /label=Transcriptional regulator, LysR family
                     /db_xref="SEED:fig|6666666.356854.peg.65"
                     /translation="MRLDKLEIRWLKLFCKIVENKGITNAQEATGLSQPVLSHYLSRLE
                     DTLGLILCERGRGGFSLTTEGELVYQEARSVIATLDDFANRLARIKHELIGEVRLGCLD
                     NIVSHPERAVPLAIRRLLELSPDASMNLYVSDHQSLMERLRNSELDVVLTVLPDDVPPD
                     IFFQPAFIEHSSFYAAAEHAGRIEQEWRDGTLNPKRLLVGGYAMNEMCKQLGSVAKQGQ
                     QSIACSEEGCMLLILAGTHVGFLPDHYASRWVLEGMLTAIAPENLRLNSIFYLVRNARQ
                     RLSPVAEVLWNNIAEIGQLSPAYRRRRL"
     CDS             complement(52727..53875)
                     /codon_start=1
                     /product="Hypothetical MFS-type transporter protein YcaD"
                     /label=Hypothetical MFS-type transporter protein YcaD
                     /db_xref="SEED:fig|6666666.356854.peg.66"
                     /translation="MSTYTRPVLLLLCGLLLLTVCLAVLNTLVPLWLNDRQLPVWQVGV
                     VGSAYFSGNLVGTLVAGRLIRYSGFNRSYYLAVLMFGGATAALALSPDIGSWILWRFVA
                     GIACALIWVVVESALLCSGNALNRGQLLAAYMMAYYLGSVVGQLLLSMVSTALFSILPW
                     LVALVLLAALPLLFARIPPPQPVTHRVNVWRMLRYRTALLGIQGCVISGIILGSLYGLM
                     PLYLAHQGMSDASVGYWMALLISAGILGQWPVGRMADRYGRLLVLRVLVFAVILGSLAI
                     LLPGRYSMASSLFLLGAAGFTLYPVAMSWACEKVAPNELVAMNQALLLSYTIGSLCGPS
                     LAAMLMQTYSDKLLFVLIAAVSLGYLIILLKKADHHPRPLAV"
     CDS             complement(54018..54926)
                     /codon_start=1
                     /product="LysR-family transcriptional regulator clustered 
                     with PA0057"
                     /label=LysR-family transcriptional regulator clustered
                     /db_xref="SEED:fig|6666666.356854.peg.67"
                     /db_xref="GO:0003700"
                     /translation="MDRITAAQVFVTITEQGSLTGAADALEMSRAMVTRYLAEMERWAE
                     ARLLHRSTRQLSLTHEGETVLQHCRELLAVSHKLDMPAKGRKEPAGLLRLTCSPSLAQA
                     TLVAAITTYLLRYPKTAVDLQVASHTLNLIEERIDLAIRITSQLDSGLIARRLGGCPSV
                     VCAAPSYLAAHGTPQRVEDLAVHNCLTYSFFGKSLWQFTRKGDTIAVPVSGSFSANDSL
                     MLLEAALNGAGVSLQPVYSVTDLIASKRLIALFPESQPQELDIYAVYHSRERMSPALRA
                     LVDFLAEWFGNNLEWKRVARR"
     CDS             55030..55905
                     /codon_start=1
                     /product="Metallo-beta-lactamase superfamily protein 
                     PA0057"
                     /label=Metallo-beta-lactamase superfamily protein PA0057
                     /db_xref="SEED:fig|6666666.356854.peg.68"
                     /translation="MLKRTLLATLLASMAFSASAALKMEVYNPGAKSLFPVSSEIITGE
                     HDALLIDAQFQRNDAENLVAKIHATGKKLKTIYISHHDPDFYFGLDVLKAAFPDAQIVA
                     TPQTIAAINATKDKKIAYWGPILKENAPKQVITPQPLNTDHLTLEGSNIDIMGLKGATP
                     DRTFVWIPSLKAVVGGVQTSANIHVWVADTQTTASRQAWLSDLDAIDKLNPTTVVPGHY
                     LPNKDGSSPWSLQNVSFTRDYLKTFEKNIPLSANSTALVKSMELAYPDLGEAASLELSA
                     KVIKGEMQWP"
     CDS             56192..56836
                     /codon_start=1
                     /product="Thioredoxin-like protein clustered with PA0057"
                     /label=Thioredoxin-like protein clustered with PA0057
                     /db_xref="SEED:fig|6666666.356854.peg.69"
                     /translation="MNRLHYIFDPLCGWCYAAAPLIHAARKIEGLPVVLHAGGMMTGPN
                     RRRITPEWRDYVQPHDRRIAQMSGQPFGDGYFNGLLWDVTATLDSEPPTTAILAAEELG
                     GRGIDLLERLQRAHYVEGLCISETSVLLKMAVEIGLPLEDFENACIHWRGLPTRKHIEE
                     SRQWLTQSGGAGFPTIVFAVDDIFTTLNIAPWLGRADDWHNYLLKLVEENQ"
     CDS             complement(56852..56971)
                     /codon_start=1
                     /product="hypothetical protein"
                     /label=hypothetical protein
                     /db_xref="SEED:fig|6666666.356854.peg.70"
                     /translation="MCFSDERTTIPYHARRKKKNQMPRLDWSNPLFLIALFMK"
ORIGIN
        1 ctggcgttac cggttgcgga tatcgccgca caggcgctga gtgaagacgg catcgcaacc
       61 atgcgacgca acgtggccga actcagtgag aatcgccgct ggctaagcga ttcgttgaaa
      121 acgctgccaa acgtggaaac ggtatacgcc agtgaaagca actatctgct ggtgcgtttc
      181 accgattcac ccgccgtctt caaatcctta tgggatcagg gcattatttt acgtgaccag
      241 aacaaacagc cgggtctggc gggttgtctg cgtatttcta tcggcacccg ctacgaatgc
      301 gagcgcgtaa tcagcgcgtt gcaggcattg ttgggcaaaa cagcataatt tgaggaagca
      361 ccgtgggatt aaagtatctt ttcatcgacc gtgacggcac gctgattgcc gagccgcccg
      421 aggattatca ggttgatcgg ctggataagt tggctttaga accggatgtt attccgtcac
      481 tgctcacctt gcaaaaagcc ggtttcaaat tggtgatgat caccaatcag gatggcctgg
      541 gtaccagcag cttcccgcag gaagatttcg atccgccgca caacctgatg atgcaaattt
      601 tcacctcaca aggtattcgc tttgagcggg tgttgatttg cccacatttc cctggcgaca
      661 actgtgactg ccggaaaccg aaaaccgcgc tggttgatgc gtttttgaaa gacaacgtga
      721 tggatggcgc caacagcttt gtgattggcg accgtgaaac cgatgttcaa ctggcgcaca
      781 acatgggcat cactggcctg cgttatcaac gcgatggcct caactggcag gcgatcaccg
      841 cccagttgac caaacgagac cgccacgccc acgtgaaccg ggtcacccgt gaaaccgcta
      901 ttgatgtcaa cgtgtggctg gatcgcgaag gcggcagcaa gatccatacc ggtgtcggct
      961 tcttcgacca catgctggat cagattgcca cccacggcgg ttttcgcctg aatattgatg
     1021 taaaaggcga cctgtatatc gacgatcacc ataccgtgga agataccggg ttggcattag
     1081 gcgaagcact gaacaaagcg ctgggtgaca agcgcggtat tggccgtttc gggtttgtgt
     1141 tgccgatgga tgaatgtctg gcacgctgtg cgcttgatat ctctggccgt ccgcatctgg
     1201 agtacaaagc agagtttaac taccaacgcg tcggcgacct gagtaccgaa atggtcgagc
     1261 acttcttccg ctcgctctct tacgcgatgg gctgcaccct gcatctgaaa accaaaggtc
     1321 gtaacgatca ccaccgcgtc gaaagcctgt tcaaagtctt tggccgtgcg ctacgtcagg
     1381 ctattcgggt ggagggtgat accctgccca gctccaaagg agtgctgtga tgaacgtggt
     1441 gatcctggat accggctgcg ccaacctgtc atccgtgatg tatgcggtta aacgcctggg
     1501 gtatgagccg caggtcagcc gcgagccgga agtagtatta cgtgccgata agttgtttct
     1561 gccgggggtg ggtaccgcgc aagcggcaat ggaccaactg gctgaacgcc aactgattgc
     1621 cctgattaaa gcctgtaccc agccggtatt gggcatctgc cttggcatgc agttactggg
     1681 cagccgcagt gacgaaagcg gcggcatcga tacgctaggc attatcgata cccctgtgct
     1741 gcagatggcc gatcgtggtc tgcctttgcc gcatatgggc tggaatcagg tgacatcgca
     1801 agctggccac cgcctgttcc gcgatattcc agatggctcg tacttttatt ttgtacacag
     1861 ttacgcgatg ccggtttgcg ccaatactat tgcccaatcg cattatggcg atgccttcac
     1921 cgcagcagta cagaaggata acttctacgg cgtccagttc catccggaac gctctggtgc
     1981 agcgggtgcc cagctactga agaattttct ggagatgtaa acggacatga ttattcccgc
     2041 attagacctg attgatggac aggtggtccg tttgcatcag ggtgattatg gtcagcagcg
     2101 tcaatacggc agcgacccgc taccacgcct gcaagactat caacagcaag gggcgcaggt
     2161 attacatctg gtagatttga ccggggccaa agacccagca gcacgccaga tcccactgct
     2221 gaaaacactg ctggccgggg tttctgtacc ggtacaagtc ggtggcggca ttcgtaccga
     2281 acacgatgtg gaagtactgt tggcagcggg agccacgcgt gtggttatcg gctcaacagc
     2341 ggtaaaacag cctgagctag tgcaacaatg gttcgcccgc tacggtgctg atgcactgat
     2401 actggcgctg gatgtgcgta ttgacgctgc gggtgtgaaa aacatcgcca tcagcggctg
     2461 gcaggaaaat tccggcatca cgctggagca aacggtggaa cgctatctgc ccttcggtct
     2521 gaaacacgtg ctctgtaccg atatctcccg cgatggcaca ttacagggct ctaacgtcga
     2581 gctgtatcgc gaaatcagtg ctcgctatcc actagtcgct tttcaggcat ctggcggtat
     2641 cggttcactg tcagatattg ctgcgctgcg tgatagtggc gtgcgtggtg ttatcgtcgg
     2701 ccgcgccttg ctggaaggta aattcaacgt gacggaggcg atttcatgct ggcaaaacgg
     2761 ataatcccct gtctggacgt gcgtgacggt caggtcgtaa aaggcgtgca gtttcgcaat
     2821 catgagatta ttggtgatat cgtgcccctg gctcaacgct acgcacaaga aggcgcagat
     2881 gaactggtat tttatgatat caccgcgtca tccgatggcc gggtggtgga taaaagctgg
     2941 gtttctcgcg tagcggaagt gatcgatatt ccgttttgcg tcgcgggtgg catcaaaagt
     3001 gtcgaagatg ccgggcaaat tctgtctttt ggtgcggata aaatctctat caactcacca
     3061 gcactggctg acccagcgct aatttcacgt ctggctgatc gttatggcgt acaatgcatc
     3121 gttgtcggca tcgatacctg gcatgatgcc gaaaccggcc gttatcatgt caaccaatat
     3181 accggcgatg aaaagcgtac ccgcgtcacg caatgggaaa cccttgactg ggtacaggaa
     3241 gtgcagaagc gcggtgccgg tgaaattgta ctgaatatga tgaatcagga tggcgtgcgc
     3301 aatggctatg acctgacgca actgcggcag gtgcgtgatg tctgccaggt accgttaatc
     3361 gcctccggtg gtgctggcac tatgcagcat ttccttgatg catttcagga tgccggggtg
     3421 gacggtgcat tggcagcatc agtattccat aaacaaatta tcaatattgg tgaactcaag
     3481 cagttcctta agcaacaagg cgtggagatc cgggtgtgtt aaccgaacaa caacaaagcc
     3541 agctcgactg gcaaaaaacc gatggcatga tgcctgccat cgtacagcat gccgtttcag
     3601 gcgaagtact gatgctgggt tacatgactc aggatgcgtt gcaggttacg caagagaccg
     3661 gtcacgtcac cttctactcc cgcaccaagc agcgtttgtg gaccaaaggg gagtcctccg
     3721 gccactttct caacgtggtg tcgatcacgc cggactgcga caacgacacg ctgttagttc
     3781 tggtcaatcc ggtcggcccg acgtgccatc ttggcaatac cagttgcttc catccggctg
     3841 aaacacagtg gcaattcttg taccagttgg agcagttgtt ggcagagcgt aagcacgctg
     3901 acccaaccag ctcctatacc gccagactgt acgccagcgg cactaagcgc atcgcccaga
     3961 aggttggcga ggaaggtctg gaaaccgcac tcgccgcgac agtgcacgac cgcgaagaac
     4021 tgaccaacga agcctctgat ctgatctatc acctgctggt gctgttacag gatcaggagc
     4081 tggatttagg aaccattatc cagcgcttga aagagcgtca tactaaataa tcttcccagc
     4141 ccgttttagc gttattaaaa cgggcttctc ctcgttactc tggcattgcc gcgtctgaca
     4201 gcatctaccc gcatttcagc caagtaccct caagctcact ttatttaccc tacccttaat
     4261 gtgcacttca caccacaagg cgatgacgac aagccctgtg ctgtgaggat tctgtttatc
     4321 tcactgactc ataagggcaa acgatgaaat ttaccaatag ccgcgttaaa ccgttaagta
     4381 ttctggcgac aacagtagta cttttctctc agccgtcaca ggccacgtca tctgacgtgg
     4441 aaaacgtact taaacgcaac ggattggaca atacacaaat catgacgctt taccgtaacg
     4501 gtgagttaag cgtaaaagaa gatacacagc ttcacacact gacactggtc aataagacag
     4561 tagtcgaaac gccacagagt acaatccata atgctaaata ctggtatcac gccatgccac
     4621 tgtcggaata tcgcaccttt gaagccaacg gattaaccgc gttaccttgc acacagcaat
     4681 atacggattg caagctgacg ctggagcact cttataccca gaaatcgtta tccaaagata
     4741 aagccggtgt tctgattcaa ttcagtacac cgaaagaagg atggctctat gaagactttg
     4801 tcacacgcca tcattgccct gtcaaacaag aaggcggcgg cagctttatt ttaggtgaaa
     4861 aaggtaaagc tgcggttgcc agcggtgaat gcgacaagga gtatcgtggt atggggctgg
     4921 gtaacgtgtt caacaattac ctgaagcaaa agagcgtaac cccgattatc gcttatgtat
     4981 tactaccgaa ataaggcata tcaaacttat tccctgaagg aaagcaccgc cccatagtag
     5041 tcaaaaagag ccttggtatt cctcttcggg ccacatgtgc aaataacagc aacaggctgt
     5101 tttattagat aaaaaaatag cccccaatta attgggggct atctatcaaa caggcgttat
     5161 gactgactaa tcagccataa atgttagcgc gatcgcgcaa ttccttaccc ggtttgaagt
     5221 ggggaacata tttgccttcc agttccactt tctcacccgt tttcggatta cgccccacac
     5281 gcggtgcacg gtagtggagt gaaaaactgc caaacccacg gatttcgatg cgatcaccgc
     5341 tggccagcgt tgtggccatc tgttccagca tctccttcac ggcatcctca accaccttgg
     5401 ccgggatatg agattgctgt ccagcaagtc tttcgataag ttcagacttg gtcatgattc
     5461 ctccaagcat gtggtcagta aatgccacgt taacttacta ccgtttgagg tcaggcagca
     5521 agtacgctgc ccaacccacc gtcattactc gccttttgca gctttgaacg cttcagccat
     5581 ggcgttagag aagttacctt cttcctgttt gttgttaaca gaagcgatgg catctttctc
     5641 gtcagcttca tccttagcac ggatggacag gctaacaacg cggtttttac gatcaacgcc
     5701 agtgtatttg gcttcgatct catcaccgac gttcagaacc agggtagcgt cttcgatacg
     5761 gtcacgagag gcttcagaag cacgcaggta accttcaacg ccgtcagcta attcaactgt
     5821 agcacctttg gcatcaactg cagtgacttt acctgtaaca atcgcacctt tcttgttaac
     5881 agacaggtag ttgttgaacg ggtcttcagc cagttgtttc acgcccaggg agatacgctc
     5941 acgctctgca tcaacctgca gaacaacagc ggcgatttcg tcacctttct tgtattcgcg
     6001 aacggcttct tcgccagcca cgttccagga aatgtcagac aggtgcacca gaccatcgat
     6061 gccgccatcc agaccgatga agataccgaa atcagtgatg gacttgatct tgccttctac
     6121 gcggtcaccc ttgttgtggg tttcagcgaa ctgctgccac gggttggctt tgcactgttt
     6181 caggcccaga gagatacgac gacgttcttc gtcgatatcc agaaccataa cttccactac
     6241 gtcgcccacg ttaaccactt tggacggatg gatgttcttg ttggtccaat ccatttcgga
     6301 tacgtgtacc agaccttcaa cgccttcttc gatttctacg aagcagccgt aatcagtcag
     6361 gttagttaca cgaccggtca gcttggtgcc ttccggataa cgtttagcga tagctaccca
     6421 cggatcttcg cccagctgtt tcaggcccag agaaacacgg gtacgttcgc ggtcgaactt
     6481 cagcacttta acagtgattt cgtcgccaac attgacgatt tcgctcgggt gcttaacgcg
     6541 tttccacgcc atgtcggtga tgtgcagcag gccgtcaacg ccgcccagat caacgaatgc
     6601 gccgtagtca gtgaggttct taacgatacc tttgacttcc atgccttcct gcaggttttc
     6661 cagcagttga tcacgctcag cactgttttc agattcgata acagcacgac gggaaacgac
     6721 gacgttattg cgtttctggt ccagcttgat cactttgaac tcaagctctt tgccttccag
     6781 atgcagggtg tcacgtaccg gacgaacatc aaccagagaa cctggcagga acgcacgaat
     6841 accgttcagc tcgacggtga aaccaccttt tactttaccg ttgataacac cggtaacagt
     6901 ggcagattct tcgtaagctt tttccagcat cagccatgct tcgtgacgtt tagctttttc
     6961 acgggacagc agggtttcac cgaagccgtc ttctaccgca tccagagcta cgtcaacttc
     7021 atcaccaacc tggatttcaa tttcaccctg ggcgttttta aactgttcta ccggaatggc
     7081 agattcagat ttcaggccgg catcaaccag gactacgtcc ttgtcaatag caaccacaac
     7141 gccacgaacg atggaacccg ggcgggtttc gatttctttc agggattctt caaagagttg
     7201 agcaaaagat tcagtcatgt tgataatctt tgggttttca aatttaacgt ccacctgaca
     7261 tcctgcccga tggggttgtt tcacatcccc gaggcatcct tgcggcgggg taagaaatat
     7321 aatcaggcca attgcggcaa tacctgacga acatacgcca gagcctgctt gaccacttcg
     7381 tccaacgtca tgtgcgtgga atcgagaacc agtgcatccg gtgctggcac cagtggtgca
     7441 accgaacggt tacgatcgcg atcatcacgc tctttaatct cggacaaaag acgttcaaag
     7501 ttaacattaa agcctttcgc ctgcaactgg agcatgcgac gtttcgcgcg ttcctctgca
     7561 ctggcatcca gaaatatctt caccggagca tcaggaaaaa ccaccgttcc catgtcgcgg
     7621 ccatcggcaa tcagccctgg cgcatcgcga aacgcacgct ggcggcgcaa taacgcttca
     7681 cgtacccgtg ggaacactgc tgcctgagac gcggtattgc caacctcctg agtgcggatt
     7741 tcattgctga catcttcgcc ttcaagaatc actttgagtt gcccatcttc cggcacaaac
     7801 tgcacatcca ggtgcgatgc tatcggcact aacgcctctt cagacgtgat atcaacctga
     7861 tggtgtaacg ccgccaacgc cagcacgcga taaatcgcac cggaatccag cagattccat
     7921 tgcagtgcat tagccagcgc tttacacaag gtccccttgc ctgcgccacc gggcccgtcg
     7981 accgtaatta ccggtgcagt caccgccatt tctcactcct ttaaaaccgg gaaatcgcct
     8041 gtcattgcag acaacattca tacagataat acatgtcgcc attatacctt gctgtggcag
     8101 caagcgtgag attaaaggct tattactgca gaaaatcggg caaatattgt gatacccaga
     8161 gtataacgct aaataataac gcacagagct ctactggcag atcagtccag ccactccgtg
     8221 cgttaacgca ttagccgtgc tggctcagac gttccagttg ctggaaataa tccgggaacg
     8281 ttttggcagt acatttaggg tcaaggatag tgacaggcgt atctgataac gccaccagag
     8341 agaaacacat cgccatacgg tggtcattat aggtcccgat ttctgcggct tttagctgct
     8401 tcggcggcgt aatacgaatg taatcatgcc cttcttccac ttcagcaccg actttacgca
     8461 gttctgtcgc catcgcagcc agacgatcgg tttctttaac gcgccagttg tagatattac
     8521 gcagcgtcgt cgttcccccc tcagcgaaca acgcggcggt agcaatggtc atcgccgcat
     8581 caggaatatg gttcatgtcc atatcaatcg catgcaactc accacgctga cattcgatat
     8641 agtcatcccc ccaacgaacc tgcgcgccca ttttctccag cacatcagca aaacggatat
     8701 ccccttgcac gctgttgcga ccaacgccag tcacacgcac cgttccgccc cgaatagcgg
     8761 cagcggccag gaaataggaa gccgacgagg catcgccttc caccagataa tgccctggtg
     8821 actgataatg ctgattaccg gcaaccacaa aagtctggta attattattg gtaaccgtaa
     8881 taccaaaggt ttgcatcata tgcagggtaa tgtcgatata aggcttggaa accagatcac
     8941 ccttgatagt gatctgcgta tcctgtgctg ccagcggtgc agtcatcagc agtgcggtca
     9001 gaaactggct tgatacggaa ccatctacgc taatttcgcc gccctgaaag cccccctgca
     9061 aacgcaatgg cgggtagttt tcctgctcca gataatcgat acgcgcgcca ccctggcgta
     9121 acgcatccac caaatggccg atcggtcgct ctttcatgcg tggctcacca gtcagcacga
     9181 tatcgccatc tgtcaggcat agcgctgccg ccagtggacg catcgccgtt ccggcgtttc
     9241 ccaaaaacaa ctccagtggt gcagacgcag tgaacgcacc gcccagtccc acaatgtcac
     9301 actccgtacg actggcagac agatgatatt caacgcccag agcactcagg gcgttgagca
     9361 tatggcgcac atcatcgcta tccagcagat tagtcagccg cgttgtccct ttcgccaacg
     9421 ccgctaacag caaagcgcgg ttagacacac ttttagaacc cggcaaatta atggtgccgt
     9481 caattaatga gatcggttgt agggtcaggg attcctgcat gtgaaacatg ttctccaaaa
     9541 gtttacataa aaaccccggc cagataaccg gggttttaaa taaaaaacag cacgctaatg
     9601 cgctctattt attacgtttt atcacgttat cagccgtgac ggcgctcgaa gtctgccatg
     9661 aactccgtca gtgcttttac accactcagc ggcatagcat tatagataga tgcgcgcatc
     9721 ccgcccacaa cacgatggcc tttcagcgca tgcaacccgg cagcctgagc ttcctgcagg
     9781 aataccggat ccaacgcggc atcggccaac tggaatggca cgttcatacg cgaacggcta
     9841 cccgggacaa catcattacg ataaaaatcg ctgccatcaa tggcggagta cagcagatcg
     9901 gccttcgcct gattgcgttt ttccatctcc aaaaggccac cctgctcttt cagccacttg
     9961 aacaccatgc cagacagata ccaggcaaat gtcggcggcg tgttaaacat ggagtcgtta
    10021 tcagccagaa ttttgtaatc cagaatcgac ggcaattcac ggcgagcctt gccgagcagg
    10081 tcatcccgca caatcaccag cgtcaggcca gctggcccta cgtttttctg tgcaccagca
    10141 taaatgacgc cgtaacggct cacatccagc ggacgcgaca aaatactgga agagtagtcc
    10201 gccaccacaa ttttatcgcc gaaatccggc tcttcttcga ttgccagacc gtcgatggtt
    10261 tcattcgggc agtaatgtac ataagcggcg tcatctgaca gcacccactc actcatcggc
    10321 ttcacaccac gcagaccatc agcgcgggtt ttcacatcaa taacggtcgg tgtgagatat
    10381 ttctcagctt ctttaaccgc gctgtgcgcc cagtacccgc catcaatata atccgcgtgg
    10441 gttttctccc ccagcagatt gagcggaacc gccgcaaact gggcacgggc accaccatga
    10501 cagaacaata ccttgtaatt cgaggggatt ttcagcaaat cacgcaaatc ctgttcagat
    10561 tcgctggcca cctgcatgaa ttctttgctg cggtggctga tttccatcac cgaggtaccc
    10621 aacccgtgcc agttgcacag ttcttgttct gctcgacgta atacttctac cggtaacatg
    10681 gccggaccag cactaaaatt aaaaacctga gtcatttccc ttcaccacat atcaatagcg
    10741 acctgtctac gtcgcatcag tttaccttgc tatcggtttt atcattcgtc tttcttgcct
    10801 gcaacgctta ttgccctgat ggcggaaaac ttgcgtactc ccccgcctgt tacggtttct
    10861 gttacccctc tgttgcattg tcatcgggaa gcgccgcgca atacacaaca tgcgggatag
    10921 agtcagtaca caaaaccacg tatgatgcag cctcctcatc acacattcag gttcgaacca
    10981 tgacccaaac gtttatccca ggcaaagacg ccgccctgga agattccatc gcccgttttc
    11041 aacaacaact cctcgacctg gggtttaaca tcgaagaagc ctcctggctg aacccggtgc
    11101 ccaacgtctg gtcggtacat atccgcgacc gcgactgcgc actgtgtttc accaatggta
    11161 aaggcgcgac ccgcaaagcg gcgctggctt ccgcattggg tgagtacttc gaacgtctgt
    11221 ccactaacta cttttttgcc gacttctatc tgggacaaca catcgccgaa ggtgacttcg
    11281 tgcattaccc tgacgagaag tggttcccgc ttcctgaaga tgacagcctg ccggaaggca
    11341 ttctggatgc tcgtctgcat gctttctacg acccggagca gcaactggtc gccagcgatc
    11401 ttatcgatct gcaatctggc aaccacgatc gcggtatctg cgccctgccg tttacccgcc
    11461 agtctgacca gcagacggtt tacatcccga tgaacatcat cggtaatttg tacgtgtcga
    11521 acggcatgtc agcaggtaat acccgcaatg aagcgcgtgt tcaggggctg tcagaagtat
    11581 tcgagcgtta tgtgaaaaac cggattatcg ccgagtccat cagcctgccg tcgatcccgg
    11641 cggaggtgtt atcacgttat ccaggcgtgg tggaagccat tgccacactg gagcaagaag
    11701 gctttccaat atttgcctat gatgcttcgc tcggtggtca gtacccggtt atctgtgtcg
    11761 tgctgttcaa cccggctaat ggcacctgtt ttgcatcgtt cggcgcgcat ccagattttg
    11821 gcgtagcgct tgagagaacg gtgaccgaat tgcttcaggg ccgtggactg aaagatctgg
    11881 acgtgttcac accgccaaca ttcgataatg aggaagtagc cgaacacacc aatctggaaa
    11941 cccattttat cgattccagc ggtcttatct cctgggattt gtttaaaacc cagtcagatt
    12001 atgacttcgc cgattggaat ttcagcggca ctaccgagca agaattcgcg acactgatgg
    12061 ccatcttcaa taaggaagat aaagaagttt acatcgcgga ttatgagcat ctctcagtgt
    12121 atgcctgccg tattctggtg ccgggcatgt cggatatcta tccggcagaa gacctgctgt
    12181 tggcaaacaa cagtatggga gcgcatctgc gcgaaacact actgtccttg ccggatagcc
    12241 agtgggaaaa agaagactat ctggcattgc tacaacaact ggacgatgaa ggcctggatg
    12301 attttacccg agtgcgcgaa ttgctgggga tagcaaccgg taaagataac ggctggttca
    12361 cattgcgtat tggcgagctg aaatccatgc tggcactggc aggcggcgat ctggagcaag
    12421 cactgagctg ggccgaatgg tcactggatt tcaaccagtc agtcttctct gcagcgcgcg
    12481 gtaattatta ccgttgcctg caaacactgc tgcaactggc gctggagcct gaacgcgacc
    12541 ctgctcagta ctacgatgcc tttgtccgta tgtacggcca ggatgccgtc gatgccgcca
    12601 gcgcagcgat tgccggtgag caatgcttct atggcttatt caccgttgat gccgatttga
    12661 aagcactgcc cgctcatcag tccctgctgg cagcctatga aaaattgcag cgcgctaagc
    12721 gtgcacactg gcaggtgaag taagcgttat ctcagcagac cggatgacgc tatcgttatc
    12781 cggttactgt ttgcgacaca gaccactgcg tatcaacaga ctctgcgttt acacccacaa
    12841 gttgacttgc aaaacaacgc actcacatgt tgaacaacat cacgaactgg tatgcaaatc
    12901 gaagcctatt gaccaggcaa gtaagcgcgc caacaccgtt gcaacgtgcg caatgacagg
    12961 gatatgacct atttttatac cggttctctg ccctgcagat ctttcgtcgc ccaatacacc
    13021 gattaaccac atatttttta tggttaattt aaagtacacc gagatgactt ttataaattc
    13081 gttattgtta tcgaatggta aatggcaaat taaataatat aaacttgaaa tatgatatca
    13141 ctacaaagac ttattttatt taacgtcata cgggctaatt tcaacccaca attcaactgt
    13201 tttgataatt tttaaaaaaa tttttaacat aaaaaacaat aggatatatg taaaatcacc
    13261 caaaaacctc ctcctgatca gcctaataaa ttccagcggt atgatccacg tcaaattatg
    13321 gcgaataacc ctttgttagt atctcaccgt agataatttt taagagagag ttagtgtgaa
    13381 agctgacaac cccttcacct tgttattacc accagcgatg gcgaaagtcg cagaagatgc
    13441 cggtgtgtat aaagcaacaa aacaaccgct tactacgttt ttcctggcga tcactgctgg
    13501 cgtatttatt tcaatcgcat tcgtttttta tatcaccgcg accaccggtt cctcgtccat
    13561 gccgtacggg atggctaaac tggttggggg tatctgcttc tccctgggat tgatgctggt
    13621 ggttgtctgc ggtgctgatt tattcacatc gacagtgctg attgttatcg ctaaagctag
    13681 cgggcgtatt acctggaaac agctaggatt aaactggctc aatgtgtatg tcggcaacct
    13741 gattggcgcg ttgtttttcg ttgcgttgat gtggttttcc ggtgaacaca tggtggcaaa
    13801 tggtgcctgg ggcctgaatg tactgcaaac ggctaatcac aaactggaac atacgttcgt
    13861 tgaagcgtta tgtcttggga tactggcaaa cctgatggtc tgtctggctg tttggatgag
    13921 ctattctggc cgtacactga ctgacaaaat gctggcaatg attctgcctg tcgcgatgtt
    13981 cgtcgccagc ggcttcgagc acagtatcgc caacatgttc atgatcccga tggggattgt
    14041 ggttaagaac ttcgctccag aaactttctg gcacgccatc agcatgacgc cgggccagtt
    14101 tgaacacttg accatcagca actttattgt cgataacctg attcctgtca cgatcggcaa
    14161 cattattggt ggtggactgc tggtaggctt gacctattgg gtcatttatt tgcgcggtgg
    14221 ggatcagcac taagctgctg tcggccgcaa cgtcgggtta taaaaatcca aatcaaaggt
    14281 aggtgtaata tgaccgaact taatcagaaa ctcgcccagg cttgggaagg ttttagcaaa
    14341 ggcgaatggc agaatggcgt caacgtacgt gacttcattc agaaaaacta cacgccgtat
    14401 gaaggtgacg aagccttcct ggccggtgct acccaggcaa ccagctccct gtgggacaag
    14461 gtgatggaag gcatcaaaca ggaaaaccgt acccatgcgc cggttgattt cgataccgac
    14521 gttgcagcta ccatcacttc ccacgacgcc ggctatatca acaagaacct ggaaaaaatt
    14581 gttggtctgc agactgatgc tccgctgaaa cgtgcgatta tcccgttcgg tggtatcaaa
    14641 atggttgaag gttcctgtga agtttacggt cgtaaactgg atccgcagct gaaaaaaatc
    14701 ttcactgact accgcaaaac tcacaaccag ggtgtgttcg acgtttatac tccggacatc
    14761 ctgcgctgcc gtaaatccgg tgtgttgact ggtctgcctg acgcatacgg ccgtggtcgt
    14821 atcatcggtg actatcgccg tgttgcgctg tacggtatcg actacctgat ggcagacaaa
    14881 ttcgcccagt tcacttctct gcaatccaaa ctggaaaacg gtgaagatct ggaagcgacc
    14941 atccgtctgc gtgaagaaat tgccgaccag caccgtgcgc tgggtcagat caaagaaatg
    15001 gctgccaaat acggttgcga catttctggt ccggcaacaa acgctcagga agcggtacag
    15061 tggacctact tcggttatct ggctgcagtt aaatctcaga acggcgcagc aatgtctttc
    15121 ggtcgtgtat ccacattcct ggatgtctac atcgagcgcg atctgaaagc aggtaaaatc
    15181 accgaacagg aagcccagga actggtcgac cacctggtga tgaaactgcg tatggtacgt
    15241 ttcctgcgta ccccggaata tgatgaactg ttctccggcg acccaatttg ggcaacggaa
    15301 tctctggctg gtatgggtct ggatggccgt acgctggtta ccaaaaacag cttccgtttc
    15361 ctgaacaccc tgtacaccat ggggccgtct ccggaaccga acatgaccat cctgtggtct
    15421 gaaaaactgc cgctgaactt caagaaattc gccgctaaag tgtctatcga tacctcttct
    15481 ctgcagtacg agaacgatga cctgatgcgt ccggacttca acaacgacga ctatgctatc
    15541 gcttgctgtg taagcccgat ggttgtcggt aaacaaatgc agttcttcgg tgcccgcgct
    15601 aacctggcga aaaccatgct gtacgctatc aacggcggtg tggacgaaaa actgaaaatg
    15661 caggtcggcc cgaaatctga accgatcaaa agcgatgtac tgaactttga cgaagtgatg
    15721 gaacgtatgg atcacttcat ggactggctg gctaaacagt acgtcaccgc gctgaacatc
    15781 atccactaca tgcacgacaa atacagctac gaagcatcgc tgatggctct gcatgaccgt
    15841 gacgtgttcc gtactatggc atgtggtatc gcaggtctgt ctgttgcagc tgactccctg
    15901 tctgccatca aatatgccaa agtcaaaccg gttcgtgacg aaagtggtct ggctgtagac
    15961 tttaacatcg aaggtgaata cccgcagttt ggtaacaacg acccgcgtgt cgatgacctg
    16021 gcttgtgacc tggttgaacg tttcatgaag aaaattcaga aactgaatac ctaccgtggt
    16081 gctaccccga ctcagtccgt actgaccatc acctccaacg tggtatacgg taagaaaacc
    16141 ggtaacactc cggatggtcg tcgcgctggt gcaccgttcg gaccgggtgc caacccgatg
    16201 cacggtcgtg accagaaagg tgccgttgcc tctctgacct ccgtcgctaa actgccgttc
    16261 gcctacgcaa aagatggtat ttcttatacc ttctctatcg tgccgaacgc actgggtaaa
    16321 gacgatgacg tgcgtaaaac caacctggct ggtttgatgg atggttactt ccaccacgaa
    16381 gcgtctatcg aaggtggtca acacctgaac gtcaacgtaa tgaaccgcga aatgctgctc
    16441 gacgcgatgg aaaacccgga aaaatatccg cagttgacca tccgtgtatc aggttacgcc
    16501 gttcgcttta actcgctgac caaagaacag cagcaagacg ttattacccg tactttcact
    16561 cagtccatgt aattacatgt ctgtctgaaa aggcgtaaac taaaggctcc acatcggtgg
    16621 ggccttttta taacgggtat ccagtccgtt ttctttgtgg gccgcttagc ggcgctaaag
    16681 atttcttccg gaaatttttt caccactcct gccgaaataa atcagaacct gttttgtcag
    16741 cctgctctca tcggctggca ggctgacaaa acagattcga cgccgaacac cgtggtgtag
    16801 ccctccgtgc taccctgttg ttactgcgct cattgcaggc cgttatttcc cggcccaacc
    16861 tggagaaacc tcgcatgtca gttattggtg acttgaagta atcactaatc aattgaaata
    16921 aaaggattta tttctttcgg tgtccacgta ttgaccacat cgacaacaag caccgtttca
    16981 cggggcttgt tgttataagt attgccccct atctttaacc actctgtgca accaatgcac
    17041 agagcaaaaa taaaaggatt aataaatcag gagatacctc atgaaaaagt gcacatgcgc
    17101 actgttgtta ttagcttcat tctgcgcttc tgcccagtca ataaatcact cagtcctgca
    17161 aaaatcgctc aagccgtggc acccaataat cttttcggaa aatggtggtg tcatccggct
    17221 aacaatgaat gaagaccgtg taagcaatga gatctatgaa tcggtcatat taatgggggt
    17281 atgcaccccg ctatggtttg aggcaaagaa aactgcatat ctcaacaaaa taaaagagat
    17341 acatgtatta aaccgaaata gccgctctgg gtttattttt gaaagcccga aatcttcttg
    17401 tgaagaagtt ggcaaagcaa aaggtgacgg aggtaagatc gttatcgctg cccatacaca
    17461 cagcaagtaa aataactttt caaagccccg caatcatcct gcggggcttc tgttttatag
    17521 cgccatattc aactgctccc acccataacg cgatgcgggg aaaacgtctt cggaataaat
    17581 tcagacggtg acggggtttc ctatgattgc agttgatgat ttatttcaat gaaatatata
    17641 gcattcgaat caataaaatc ccatcacacc actacaaagc gattgtttac atatggcttc
    17701 tttgtaatta atacttacct gccatctggc acgattatta cgaaataagg agaacactgt
    17761 gtataaatat aaaatggttc aaattccacc gaatattatt gtcaacgcta gaaaagtcga
    17821 taaagacaat gccgccgcac attatctgga gcaggtcgta aacgaaaagg ctgaagacgg
    17881 atgggagttt cagcggattg acaccattgg cgttgaagaa caacccggct gtgcctcact
    17941 cctttttggc aaaaaaaacg ggcccgttaa ttactatgta atcacatttc gcaaagaggc
    18001 atagcatgtt ggcctggctg agtataaaga tgattgggct ttatcgtagt cttgcgcctg
    18061 attccattag ggggagatgc agatataagc cgacatgctc agcgtacgct atttctgtga
    18121 ttagacgtca tggcttctta aaagggtgga aactggcgtt agagaggatc agtaggtgta
    18181 ggccgcctta cgggggccgg gatttaccgc ccttataatc tctaatagcc aaaagccccg
    18241 cactcatcct gcggggcttt ggttttacaa cgccagattc aactgatccc gtccgtaatg
    18301 cgatgccgga aaggcgtctt gcgggataaa gccaggcggt agcgggtctt cccgtgtgcg
    18361 ctttgatacg cgccgttcta ccgtgttgag ggtggtaaat gtctcgctac attccagatt
    18421 ttggcactgg tgatactgcc ggatggtgat atcgctcagg cggcgactgg tacgggtgcg
    18481 ggccattgcc ccgcaaaaag gacatctgaa cataatggct cccctgtggg agttgaactc
    18541 gccgccattt tattcacttt ctgctatcca gtcagggatt tttgcttcca gttccagacg
    18601 ggtggtaaag ccgttgccat caataacgtg ctccacgcgg gcgataatcc agtcctgatt
    18661 gtcgatatcc ggtttaaagc cgcttactgt caggtgcatt tcgggataca gctcagcacg
    18721 gccacgcgcc agggtaatcg aaaattcagc ggccccgcgt tgcaactgtt gccatttagc
    18781 tgccgccgcc cgtctggcga cctcttcatt ctggtaggtt ttacgcagca cgaacacgtt
    18841 gccttctgcg ccggtgatgt aatcgccttc acggctgctg cttttctcct ttttcggttt
    18901 tggctttgtc cggcgacgct ttacgctgac tttcttcttt ttaccgaatt tcagatccag
    18961 ccagtaggcg cgcacaccgg tgtaggcatc ccgatccgcg atgcgaaaac ggtggccgtc
    19021 accactgctg cgggtgatac tggccgacgg cagcgccttg ccggatgccg tcacaccacc
    19081 gccgggcaga ataaacagca aggtgccgtt tttgatggtg gcaatggccc ccagttgctc
    19141 ggccatccgg gtcaggaatg acatatcact ctcttccgtc tggtcggcgt ggtcgatgtc
    19201 gatattcatc agcatgtcgc tgatttgcgc cttcataccg tagcggtgcg caatcgccga
    19261 cacgacacgc tctaccgtca cgtcatgcca ggaaacctcc cgtttcacgt tgaactcttc
    19321 gcggaaatcc gcacttctgg ccgtaacacc cagcacatcg ggcgggcctt cgtgggaaat
    19381 ctcatccacg gtatacagtc ctttgtaagt cagcgcctca ccctgccagc cgatggacag
    19441 tgcaatctga gcgccacgcg gcggcagctc cacgcgtccg tcgctgtcgt ctatcgacag
    19501 cgtgagctgg tcagcctcaa agccccggtt gtcggtcagc gacaacgaga tcagccggtc
    19561 gctcagttcc ttcagtgatt tcccacccag cgtaatgctg aaggccgggc tttttaccgc
    19621 ctcggttagc gcatcatcgt agcgtttcgc cgtagtgata agtgagtcag ccagatcggt
    19681 gatagccatc gtttccccct gttttcgcgc atgatttcac gcgcacgcgt ggggaaaaat
    19741 ggctttttgt tgtcgccgga cggccagacc tgtcagcgcg tgagtgtgcg gcggatatcg
    19801 gggattatcg ccatgaactc aataacgtaa tggtggcgaa catgtccgag acacgtttcc
    19861 acggtgtgcg cgttcgtgaa aataccgacc tggtaaccgc aatcaatgac attgattcca
    19921 gtgtgattgg cgtggtggcc gtggcggagg atgcggacgc agacaccttt cccctgaata
    19981 cgccggtgct catcacacgg gtgaatagcg tgctgggcaa agcgggtaaa accggctcgc
    20041 tctacaagac gctgaaagca atttctgacc agaccagccc gaaagtgatc gtggtacggg
    20101 tggcagcagc aaccgaaggc ggcgacaaaa cccaatccca actgattatc ggcgggacag
    20161 cggcggacgg cagttatacc ggcatgtacg ccttgctgac agcagaagcc aaggttaact
    20221 accggccgcg cattctggcg gtgccggact atgacaccgc cgaagtgacg tcagcgctgt
    20281 gtgtgattgc gcagaatctg cgggcgtttg tctatgccgg ttgtcacggc tgcaccacga
    20341 tggcggaggc catcacctac cgtgcgcagt ttgcttaccg tgagctgatg ctgatctggc
    20401 cggattttat cgcttataac ccgcttagcg gcagcaatga aacctttccg gcgtcggcct
    20461 atgcctgcgg cctgcgcgca gcgattgata acgatcaggg ctggcataag tcgctgtcga
    20521 acgtggcagt gaataacgtg ctgggtatct cgcgggatgt gttctggtcg cttcaggccg
    20581 aagacagcga cgccaatgaa ctcaacaacc aggagatcac cacgctgatt aagcgcaacg
    20641 ggtttcgctt ctggggcaac cgcaccaccg atacccatga ttacctgttt gaggtgtaca
    20701 cccgcaccgc gcaaatcctc gctgacagta tcgcggaagc gcagtttgaa gccgttgacg
    20761 agccactgac tccggccaac gtgaaagacg tggtgaatgg catcaacggc aagctgagcg
    20821 cgctggtcac ggctggcagg ctgatcggtg gggaatgctg gtttgatatt caggataacc
    20881 ccacaaccgg cctgcgacag ggacaggtgc gcgtgcgtta caagtacacg ccggtgccac
    20941 cgctggaaga cctgacgtta taccagacct tcaccgatga ctattttgac tccgctttct
    21001 cgtcactggg aggtgtgtaa atggctgtac cgcataaatt gcgcctgttc acctgttttg
    21061 tgaacggcaa caaccagatc ggcaaggtca catcggtcac gctgccaaag ctgacccgca
    21121 agactgaaga ctttcagggc gcgggcatga ttggctcggt agcggtcgat ctcggtatgg
    21181 attccggcgc actggaagcg cagatggtcg ttggcggcat ggagaaaaag ctgttgctgg
    21241 aatacggcgg tgatatcgat gacgttcgcc tgcgcttcgc gggggaatac tacaccgacg
    21301 gcgatagcca gcttgtcgag gtggaaatgc gcgggcgtat taccgagatt gacggcggcg
    21361 aatccaagca gggcgaagac acgtccgtta cctatgcgct gaaaaacacc tattacaagc
    21421 tgtcgattga cgatcaatcg gtgctggaaa ttgacctgct gaatttcatc tacaagaaaa
    21481 acggcaaaaa catctacccg gatcgcatca cgtctgcgct ggggctgggt aactgaacaa
    21541 cctgaatcat ggcggccaca agccgcccgg agcctgtcac catgaacaca ccgaatgaac
    21601 acaccgtaac cctggcgacg cctatcgtac ggggcgataa cgccatcagc caggtgagca
    21661 tcaccgacga tatcaaacag gctggctcac tgcgcggcct gcggctggtc aacgtcctga
    21721 atatggatgt tgattccatc accaccctgt taacgcgtgt tacctcgcca aagctgaagc
    21781 tggccgagat taacgcgatg gatacccgcg atttcatgcg acttgcggag gccatcacgc
    21841 cttttttagt gcatgcggag cctggcgaac cgaacgcgga ggcgacggag gaagcgtaac
    21901 cgtcttgcag ttcgaccaga tagacgatct ggtcgctgat attgccgttg tttttaactg
    21961 gccgccctct gaactgttca gcatggatct gggcgacgtg atagcctggc gcgcgcgggc
    22021 ggctatccga agtggagcca gtgaagccga tgaaaagcct tgatatccgc gtagccttca
    22081 gtgctatcga ccggctgacc cgcccggtca acgccgcccg ccagagtgcg ggcggtttgt
    22141 ctgaatccct caaacgcacc caggccgcta ttaaggatct ggataatcag tccagaacct
    22201 tcaatcgcct gcgcgacagc gtacaaaaga cctcacgcaa gattgatgaa gccagtcgca
    22261 gcctggacgg gctgaaaaag gcccagcaaa acaatgccgt gctgaccgat aagcaacggg
    22321 agcacatggc cgcactggcc gccaaactgg agcggctgaa catcacccgc gatcaggaaa
    22381 tggtgaaact acgcgccgta tcgcaggcgc tacgtggtca cggtgtgtcg cttgtcggca
    22441 gtaacgccac tatccagagc gccatccggc gcaccgaaca atataaccag acactggagc
    22501 gagagcggcg gcaactggcc gcggttacgc aggcacgcgc ccgttatgaa cgcatgcaac
    22561 agacggcagg caaactgcgc ggcagcggcg tgatggccgt ggcaggcggt gcggcagccg
    22621 gatacgcggg cgggcagttt ctggctccag cggtcgggtt tgatgaagag atgtctcgcg
    22681 ttcaggcgct gacccgtctg gataaaggcg atcagcaact ggcagccctg cgggcgcagg
    22741 ccaaaaaact cggtgcggaa accgcattca ccacccgcga tgcggccagc gggcaggcgt
    22801 ttctggcgat ggccgggttt actccgcagg ccattcaggc ggcattgccg ggcgtgttga
    22861 atatggcgct ggccggtggc atggaactgg gcgaaaccgc cgatatcggg tcaaacattc
    22921 tttcacagtt caatctggat gccagccaga tggatcgcgt cagtgacgtg ctgaccggcg
    22981 cgtttactcg caccaacacc gacctgttca gcctcggcga aaccatgaaa tacaccggcc
    23041 cggtggcggc caagctgggg atcagcctgg aagatgcggc cgcgatggcc ggtatgctgg
    23101 caaataacgg tattcgcggt agtgatgccg gtaccgccat gcgtgccagc cttgcccgtc
    23161 tggcttcacc accgaaagcg gcagcggagg cgttaaaaga gctgggcgtg tcggtagctg
    23221 acgcaaaagg caagatgcgg ccaatgcagg acgtattacg tgacctgtac aaggcgacta
    23281 aaaaatacgg ccaggtcgat caggtgtctt tcttcaaaga tattgccggg gaagaggcct
    23341 ttgtcggtct gcaaacgctg gtacaggcgg ccggtagcgg tgcattgggt aaactgtctg
    23401 gtgaactgaa gaaagccaaa ggtgaagcgg atgccgtcgc caaaaagatg gcggataacc
    23461 tgggcggtga cctgaaaaac ctcgacagtg cctgggaagg gtttcgtatt caggttgaag
    23521 agacaacaga ccggccactg cgcagcctga cgcaggggct aagcgatgtg attaccaacg
    23581 tgagcggctg ggtgagggag aatcccaggc tgacgcaaac gctgttactg gctgtcggcg
    23641 gtgcggcggc attcgcggtg gcgatcggtg gtacctcact ggcaatcggt ctgctgatgg
    23701 gtccgctggc taagctccag ctcggctttt cgctgctgct tggtgcacgg ggcgtcggtg
    23761 gtgcggtgtc gatgttttcc gggttaagta gcctgctcgg cgggccgatg gcacgcatgg
    23821 gcggctggct acagcttttc tctggcagca cgggccgact gaccgcgaca ctgaccccgc
    23881 tgcgtggcat gttactggcc gtgtttacct cgccggtgtc agcattaggg tcactggtca
    23941 ggggcgttgg cgggctgtta ttgcggctga gcggtttgcc tgtgctgtgg agcctgatca
    24001 ccggtgctgt ctcggtgtta ggtggcgtgc tgtcattgct gttaagcccg atcggattga
    24061 ttggcgcggc gtttgtggcg gctgggctgc ttatctggcg attctgggag cctatcagaa
    24121 cgtttttcag cgggatgttt accggcattg ttatcagcct tggccccatt cggcaggcat
    24181 ttacgagcct gtctcccgtc tttgatgtga ttgtgtcggc cgtatcgcgc ctgtgggatc
    24241 gatttacgca gctttttcag cctatccaga ccacaaaaaa gacgctggat gactgtgcaa
    24301 ttgcaggcta tgggttcggc aaggtgctgg ggtcggcgct ggacatgctg ttattgccgc
    24361 tgcaaaaact gatggagggg atcggctgga ttctggaaaa gctcggttta atcccgtccg
    24421 gactggatgc ggcgcagaaa aaagccgatc agttgaaaga gctgacgccg gaagggaaag
    24481 accggctgca aggtctggtc gccaacctga ccggcgacct gaaaggggcc accaccgcac
    24541 cgccacccgc atctaagcca cccctgaccg gggacagcgg cacccagcgc cgtttgcaga
    24601 agattgccga caacactggc ggcgtgctgg aagaaaccaa aaagcgcatc ggccccggtg
    24661 atatcgtttt caaaaacctg ccgaaagcgc tggctgtgcg tggcgaatgg caggaatccc
    24721 ggcttactgg cagcacacct tctgcccccc cacagcctgc gcagaccatg caggcactca
    24781 gcgaccgccc cgccgtggtc gcggcaacac agcccgtcaa acaggctgac gcgtccccgg
    24841 tcagtcgtcc ggcggccaga acaccggcgg cgggtggttt caatggggaa attcatatac
    24901 acctgcacgg cgttgaacgg caggacgccc gcgaactggg ccgcattgtg gccgatgcgg
    24961 tcagtgccga actggcccgc cgcgacaggc ttcagcgtgg cagcttcaga gacagagagt
    25021 aaggagaaaa accgatgatg atggtatacg ggttgtttgt gtttgagctg caaacgctgc
    25081 cttaccagca gcttcaacag tcgcgcgcct ggcgacatgt gaagaatgag cggatcaacc
    25141 gttccgcgaa atttcaatac attggcgcgg gggaagatca gatcacgctg agcggtgtgc
    25201 tgtacccgga aattaccggc ggggaagtct cattaactgc actgaccacg caagcctaca
    25261 gcggccgccc ctggccgttg attgacggta ccgggcagat ttacggcatg tacgtgctga
    25321 ccggtatgca gaccacgcgc acagagctga atcgctacgg aaaggcaaag aaaattgagt
    25381 tttcgctgag ctttcagcgc tgtgatgaag acctgcggga aaagctgcaa tcttcatcct
    25441 ttagcgacct gatggacaat gcgcgtagca gtgcaaacaa agcgatgaat accgtcagca
    25501 cggccatgac ggataccgtc aacacgttaa aagggttggt ttaacggccc tgtctaaaca
    25561 gggccgggta agtcaggtgg agggagtttc cggccagtcg atatccggcg cggcagaggt
    25621 atcaaggcgg cttaattgca ccagataggt tttccatgcc gtcagcgcgg tttgctcggc
    25681 gtccgtcgcc atccccaagt ccgccgcgta acccagttca gtaatgcgcg ccgttgctgc
    25741 tgttttccgc gccgcctgtt cctgctgtgc cgctgccact tctgcggcgt gttgggcagc
    25801 aacatcagtt acccatgcgt taccatccca cctgtcaaat gccgtcgctg gagtcagtag
    25861 cgtgagtcca tcatgtaact cgccgagtgc tgtcactgtt tgcggttttc cgtctgctgt
    25921 gcggtatgca gtcttaccgc gatgatcttc cacggcttcc cacgcaccac catcagcacg
    25981 gcggcaaact gcctgccctt ctaccgctgg tggcggcacg tcagtataac tatcggccgg
    26041 tattcccgta ccgcgcatca aaaactccac acctttacca gtgtactcac gggtaacatg
    26101 atcggcgtga taaaccgtaa tccatcctgc atcgacagcc agaccgtttt catccagttc
    26161 agtaatgatt ttttcagcca tgttatgcag ctctcacgat gtagttaaaa gcgacattgc
    26221 gggggcgtac atacgaacgc gcccgcgatc cgttgtgttc atacgctggt aaattgctga
    26281 ctgccgcata ttcatcagca ttaaatgtgc tatccacatt atcgattctg attgttgtcg
    26341 cggcggtgtt gttttcgatg ttcggctgga tccacgttgc cgcctgcgca gacaaaagcg
    26401 tacgctctga atccaccccg cgcccatcat cccagccgcg aataaactcg ccgcgcaaat
    26461 caggcaacgt acctgacgga tacagtgccg ccaatttcgg atagagggtt ttatcaaacg
    26521 cctggccgtt gcatttcagc cagcccgtcg gcgctatcgc ttgcggccag ggcagtggaa
    26581 taccggcaat ctccgtgata tcgagcttgt gaccgattga cacactgaca gtgcgagcaa
    26641 aattcgggtc atcgcccaat gattttgcca atttctctag cgtattcaac gcatccggca
    26701 cactacctgc cagttcattc acacgtgtgc tgatcgccgt ttgcacaaat gcggtggtgg
    26761 caatttgcgt tgtacccgtt ccaacggcgg ctgttggtgc ggttggcgtg cctgtcagca
    26821 ccgcgttaga aaacttgcca tccacgaatg agcgcgttgc cagcactacc gacgggtcaa
    26881 tcttcagcgt taccgcgtcg gtactgctga caatcaaaat catgcgtacc gtctgcaccc
    26941 ggccggagcc ttcctgtaac ttcggcttgt aggtttccgg gcagttggcg acggcgatca
    27001 gattgccatt agcgtcatac agcccgattt cccgtatcca ccagccgcct tcgtcctccg
    27061 ggatcacttg ttcggcaata atctggctgg ggttcgccgg gtctacgctc agagaattga
    27121 gcggtgcccg gcgacgctca ttgaccagtt tggtttgtgc tgtgtcggga gtcggcagag
    27181 tgccgccacc gtcgcccagt gccatttgtg taatcgatag ttgccgcccg agcgcggtag
    27241 cgtttgccag caacgccgcg ccggtgttag tcatgatcgc atagtatttt gttgtcatgc
    27301 ggatacgctc atattgtcag acagatgcac cactgcaccg cgtacatcga tgccagtcgt
    27361 ggtaatggtt tcagggacat aggggtaaac ggtcagtgcg tcaccgctgt actgcccggc
    27421 agccagcggg atagtacccg cacagtccat gacgatattt agccccagca agtggcgact
    27481 taccggtttg gcgtcggcga tcagccgctc cagctccaga taggtttctt cggtgatgcc
    27541 agcatcctgc acgccgatat ccagccggaa ggtgcccggc tggccgccgg tctgccacca
    27601 ttctgtgacc cgaatcagat agccgaacgg ctccaccacc ctgcgcaatg ccgcgagggt
    27661 gcccttctgg cggtgtacca gccaggccgc cttgatcacc tggcgtttgg tctgttctga
    27721 ccagcgttta tcccagcggt caaccgacag tgcccaggcg aggtacggca gtagttgtgc
    27781 cgggcagcgc tcggcgctcc ataacgtatc cagacagacc gctatctcac tcaggcgctg
    27841 ggtggagctg gcgacgttgc gcataaagtc gctggctgaa ggaggtagca gactgttact
    27901 catcgctacc gccctcggtg accgtgaacc cggtgcagta cgctgcctgc gtgtcgctga
    27961 tcacgatgtc ctgcgccggt tccagcagtt caacgcgttg cactccttgc acatgcagcg
    28021 ccgccatgat ggccgagcga gccacatcgc gcccgatgcg cccctgcgta ccgagccatg
    28081 acgttaacgc ctgctgtgcc gcctgttgga tcggctccga ttccggcccc ggatagcggt
    28141 acaacaccgc cgtaatggca tagcgcacaa tcccggcgct ttgcaccgtc aggcggtcac
    28201 caaccgggcg tttatcatcg gcggacagcg cggcatcgac tgccgccagc aggtcagccg
    28261 aagcgctgcc atcaccctcg gtggataaca ccgacaccac cactaccgcc ggggacggac
    28321 tgatcgcctt ggcatccgct accttgccgc tggcactttt ggcgaaatac tcatacgcac
    28381 cggttggccc cgccacgctc agcccttcaa aggcggcctg cgcccgtaaa cgtagcgcgc
    28441 tgtcagcttc catcacggca tcggcggtgt cggtcgcttc ggtaatagtc agtcgctggg
    28501 tgttcagatt ggccgccaga ttatccagat cggatgacac ggcatgactg agcaggcagg
    28561 cttccgcgcc ttcgttaatc cgctggcgta gcatcatttc ccggtaggcg atcacctggg
    28621 ctatcacggt taacggctcg gactccagcg acagcgcagc ggtcacagac gactgctgag
    28681 cggccggaaa ggcgctaatc atcaccgctt tcacgtcctg aaggatgact tcgaagtcca
    28741 gcacttcaat gatctgcggc tggggtaact gcgataaatc aaccgtcgcc atcaccgtga
    28801 ctcctgagcg taagggtaga gttggccgcc tgcatcgttt cggtaatcaa ccctgataac
    28861 tccgcttcca ccgctcccga tgctgaataa cgaatatcga cggcattcag cgagatacgc
    28921 ggttcccagc gcgtcagggc gataacggcc gcactcatca actgaagccg cgtcacagca
    28981 ttctgcggcg catccaacag gtcagggatc aggctgccgt aatcccggcg catcaccctg
    29041 gatgccagcg gcgtagtcag aatgtcgcgc actgactgcc agagctgatc ggcatcggtc
    29101 agggtgccgg tgccatgcgg attcatgccg gtataggtcg cggtcattgt gtgccactcg
    29161 tccagctacc gccgggctga atgccaccgt ggcgatggct atccacctga acgccgttag
    29221 aggtcatcgc gccgccagaa tgcgccacgt taccggccag ggtgccgccg tgggtgatct
    29281 ccacggtacg ggccttcagg tgctgagtgc attccaccac cggcgtgttc agtgtgacgc
    29341 tgactgcggc caccacattg gcggttttca tgccggtggc ttccagcgca ccggctacgg
    29401 cgtcataccg aaaccgggca ccgtccggcg cggtgatcac aatttccttc aggctgttgc
    29461 ccggtgccgg gtgggcctcg ctgaacaggc taccgatgat cacggcggtt tccgggttac
    29521 cgccaaggca ccccagtaac acctgttccc cgacggcagg cgggaaccag acgttaaacg
    29581 ccccggcgcg tgtggtgttc cagcgtagcc agtcggtgag caattcaccg ctcttaacgc
    29641 gcactcgcca gctttccggg tcaaccgccg tgacaacgcc gacacgcaac aggttttcca
    29701 gtaatcgcat cagttcagcg ctcatgtggc agcactcccc agactgttga tcaccgtttc
    29761 atggatcagt cgctcatcag ccagggagat ccccagcagc tcacgcacag ggtagcgggc
    29821 aaaggcaccc ggcccgacct tgtcacgctc gccatactga tgcacgcgag cgatacgggc
    29881 ggcgatacca tcaaagccga cgctggcccc gtcggtatcg gcctgcattt tgagaaaacg
    29941 ataaccgcgc aggcgctgaa acatcggggt tgtcttgctg gtcgtgcggc gcactgcctg
    30001 cgtgttgatc tcgatataac gctcaatatc gctgcggtaa aacgtgcgga tggcgttgcg
    30061 gtcttcatca aagccggtga tcgtgcggcc gtgttttccc cgtccaccgt gccagttttt
    30121 caggtggcgc acctgacctt cccagacaaa gaccattcct ttttgcgagc gaagcacctt
    30181 gcggcggcgg gtcgcatagg ccgagccgtc cgggttcctc tgcgccctga tacgctgctg
    30241 ctgactgcgg cgtagtgcct gcccgacctg acgggctgtt ttcagccgcc cggcgggtga
    30301 caggccggag agaatgtcat caaacacctg atccagtgcg tgaaacagtt tatccgtcat
    30361 gtcgctgtct ccccggtggc atcgtcaagc accgcatccc ataccccgcc ggtgaggcgc
    30421 ggacgaggtt cgggcaggtg ttcagcacgc aggatgccgt tatcgtcccg cgtgacctta
    30481 acccgctcgc gcaccgggat ttcaaacaga atgtcggcgc tgtcgtcgtt gttgataagc
    30541 gtggtgaatt tcacctcgcg gttcttttgc gggttcagca acaggtcggg ctggttctgc
    30601 cacagccagg ccattaacgg taaggtgaaa tcgtcgatat cgccggtgaa gttcatcacg
    30661 aacagcacca gcgagtagcg gtacagaaac gacggtgttt ccccggtggt ttcaataccg
    30721 ccttcttcca caaataccgt gaaggcttcc gggttggccc ggcaccaggt attggatgcc
    30781 gtcagcgcat cacgcagcga atcggttttc agcatgagca ttcccctatg gtgtggcggc
    30841 gtccttcaga cgctgaaggc gacgcaggta tacatcgttg atggcggcct tgtctgcgtt
    30901 gcaggtgtcc agcgcatcca acagctgatc actccagagc gcgaccgcgc cccaggtcac
    30961 cggtgttttc agtacgggcg tcggtgtggg ggccgtcagg ctgggcggta ccgggtcgtg
    31021 cagtatctgc acgctggacg gcggcggcgc gtttttgcag gctgtcgctg acagcaacag
    31081 gcaccacagt gttagcgcac gtatcgggct gcatcccctc acgcatcttt tcacggcgtt
    31141 cttccccttc ggcataacgc tgttgctcac gctcgcgcac ctgcgccagc acgtttctgg
    31201 catcgtcagc cagtgcccgg acttcgttta acagctcgcg ctgttgttgg gcgctgtcgg
    31261 tcagtgcctc ggtatgcgcc cggtcgatgc cgcgctggta ggtttgccag agcacaccac
    31321 cgacggccag caccagcagc acggcaaggg gggcggtcag cttcatggca cacccgccag
    31381 atcgcgcagg caccaggctt taaagtcgct gcgacgattg accagcccgg cggagcgctg
    31441 gccgccgctg ttgacaaaat cggtcagccg ttcacacatc gcgggccatt cctgcgcctg
    31501 tgcgtgtttc cagatggtgg tgcgctgctt gctgccctgc cggttggtaa accacatcag
    31561 gccactgcaa ccgaggttaa acgccgtgtc ggtcatggct tcaaacgccg attgcggcat
    31621 ggctgcgccg ttaaaattgc cgttgacgca attctctgcc cgctgcatgt cgttaaccca
    31681 gcgtcgggcg atctcgtcat tgctgtacgg ccggttttgc acgttaccgg tagagccaat
    31741 gcccaccgtc agcacgccag cggggcagta atacggcgac gcacggcagt cttcccaact
    31801 ggccgttttc tgctgtgctt ccggcgacgt gcgcagggta ccgggggaca gcgtgatacc
    31861 gagcgccaca attagcgcaa tcgaacagcg tttaatcgcg gttttcatcg tcaacgtcac
    31921 cctgatgcaa aatagccacc gcacggcgtt ccgacgtatt cagcgtgcgg cgctcggact
    31981 gctgtaaaat ctgttcaatc agttcattgc ggcgtcgctg tgcgcgctcg atacgacgcc
    32041 ggaacaacca ggcgcgccac gcggtgacaa caccgataac caggcccgcc agcgcaactt
    32101 tttcactgac ggtcatcacc ccgatgccgg tcaccatcac ggacaggcca taggtcaccc
    32161 catcattgag gcgctgaaga tcgtttaatc ccataactgc accgtttcct gttctgtctg
    32221 acggggaata tcaggcagcg tgatagcctg cccggccgtc agaaacatct ggcggcttaa
    32281 ccccggattg gcggcgatca cctgctcggt gacaccggcg gatgtgccgt aatggcgata
    32341 acagagcaag tccaccgtat cgccctgaag cgcccagacc accatcagca caactccgca
    32401 aaaagccgct gagcaccgct tatatcggcg atgctccagc gcgcatcacg ccataaatcg
    32461 tcacactggt tatcaaaggt gtctgctgcc ttgtcgcctt tggccgtggt atccacatcg
    32521 cggtatccct ccagcaacag cgcacgggca atggcataaa ccgcacgcct gaagcggtac
    32581 accttgatac tttcgtcgtt gacctgtctg gccggaacgt ccgccagtgc ggcatatccg
    32641 gtggcctgtt gtgtctgctg ccagctcgcc agttggtcag tcacatgcac caccgcttca
    32701 gtggtgacgt gcatcaggcg ggtggtggtg ataccgccgg tgatgcgggc ggccaggcgc
    32761 agatcacgca ggacgatcac cggccagaac tccccggcgc tgaccgtcgc cgtgccgtcg
    32821 tcaatctccg gtacgtcacc gctgtcgctg acacgttttt gagctaccag gctcatgctc
    32881 aactctccca aaagtcaggc ggtgggcacc gggcaaaaag accgtatacg ggcagatcac
    32941 ccggtgcgcc gcctgtcgga cggggccgaa gtcgttaacg tttggcagac tgacgggcgg
    33001 ctttactttt gcccgtcggt cgtgtggttt tccgcgccgt ggtgttacgc acggcggtct
    33061 tttttaccgc tggctgcgtg gcgtcggctg aagccgcagg cggtgtctcc gtggtcgttt
    33121 catcgtcacc gtgcgtgcca tcttccggct cgttactgct gcccggcatg agctttttca
    33181 gctcccgcgt cagggtggcg atctcccgtt tcactcccgc gttcggattg cgggccatcg
    33241 cttcccgaaa cagtgtcagt gcctcagctt tggtttgtgc atccactgcc gcacggcgtg
    33301 agaaggcgcg ggctttgcac aacttggcgc gcacttcatc cggcatgtct ttgccatcca
    33361 caatcgcggc cacttcatcc agcacggcgg tatacccgct caggtcggca tctgcatcgg
    33421 tggttgccag cgtcaacacc gggttgctca cttcctcagc cagtaccgtt accgcatcgc
    33481 ggcggaactt gtcggcaggc aaagacaggc catgcttaac gacgtaacgc cccagcctca
    33541 gtgtcagtgc gctatcctgg cagtcgatag cccataccat cagggtgacg atcacttcat
    33601 cctgtcggcc gctgtcgccc tccagcgtgc catcaatcca gccgtcatat tccggcagca
    33661 tggctttttt catctccgct ttggtcgcat cagattgcac ctgtttcagc gcggcctgat
    33721 gcaggcgcag acggtgaagg atttgctcat gggcagtgcg tgacaccgct gtttcggtgt
    33781 ccgcctggcc ccggcgctcg gccatgaccc gctgaaaatg tcgttgtgcc ggtgtcagca
    33841 tggtgtgttc tccggttggg gcggggtgtt accccgcctg gctgttactg gccgtcgcct
    33901 gctgcctgcg caaactgaat cccgtcgatc agggccacct tgccgtagtc ctccaccaca
    33961 aagtcgtcgt tggacgactg gtaggtggcg acccggttgt actccggttc ttcaacgatg
    34021 ctgcggcgca gcgcccccaa caggtagtac accgacagat tcttgaacga ggtgatcagc
    34081 accgcgttgg acgggaagta cggtgccagg aaggtcggca gaccgcccac acgctcctga
    34141 ctgacaatca actgaccggc cagcaactcg gtattggggt tactctggct cagtgcatta
    34201 aggcgcggaa agttgctgga cgtcagcaag tcggacgcca tgatcaccac cagatccggt
    34261 gccctgcgat gccacggatc cagcaggctg tttttggcgt caaacacagc ggtgtcgagg
    34321 ttgccgtagg tgcctttggt gacaatcttg ttgtcttcgt cgcgggcggt cagcgtgacg
    34381 tttttgataa tgcggtgccc cgcatcgttg cggatttttt gcagccagcc gacaccgcaa
    34441 tcctgcaaca gcggattggc gctgcggttg gatttctcgg cataggtggt gccgttgaaa
    34501 ccgatcatga tgcggtcaag gccgatttgc cgggcattgg cctggctgat cagcgcctga
    34561 aagttcggct gtgatgccca gacatccaac tgcgggtagc tgactgccga gtcataattc
    34621 accttacggc aatgatagtc gttaggctct ttggaatggt tgtcagtcgg attgcggcgg
    34681 gacgtgccat cgctactgtt atttgtgctg gcaatcggcc ctttgctacc gatcaggatt
    34741 ttctgacctt cctgatcctt cacgccaaac acgttaatct gtttcaggaa ttcatcgctt
    34801 tcctgtgccg cctgctccat acgctgctgg atggccggtt caacgctgaa ggtcatcgcc
    34861 acggcattcg gctgcacccc gttaagctgc gcctgacgtg atatgtactg atcaaaaaga
    34921 ttacgggtcg tgttttccat gttcgcttgt ctcgcttaac ggtacttaaa agtcagccag
    34981 ttgcgcgcca ctgttgccgc cgctggccgc cggacgctgg ctgtaactgt tatcctgcgt
    35041 cgccagcttt tgcgtgagtg cggccagttc gctggtcagc gtctgaatgg ttcggctgtc
    35101 ctgctgttgt tgggttttca gcgtgttgaa actgtcaagc aggtcagcat gggactgggc
    35161 gacgttttcc accgcctcac gcacctggtt aaactgctca ctgtccgatt tacggccttt
    35221 gccgataatc cccatcacgc gggaaaacca ttgcttcccc tcgtcgctgc gctgttcgga
    35281 cagctcaacc agctccgctt ccatcgcttc ggtgaacatg accggctcac cgggcagatt
    35341 gttgaatgcc tgcacctgtg cccgttgttg tgcggcgaat ttcaggcgat cggtgcccag
    35401 gctggccggg gtatccgtca tcgccaggcc gcgcagataa ggcttgccgg tcgcggcaaa
    35461 ctgcgggtcg atttcgatac tggaataaat cttcttccct tcgccggtga gctgcttcat
    35521 tcgctcggtg ggttcgattt ccgcatacaa cgcggcacgg ccttttagcg ggccgtcagt
    35581 aatgtcttcc gcgcttagcg caataacatc ccccatcgca ctgaaatcac tgcccggata
    35641 gggggaaaga atgtgctcaa cgttaacgcg ggcaccgtat acctgcgggt tgtagctttc
    35701 cgccattgca tagaggtggt cgcgcccgat ttcacgcccg tcaacggtgg agccggagac
    35761 ggcaacccgg aattttttgc gggtcggttt agctgtaccg ctcatgcctg tagtcctgtc
    35821 ctgtggtgtc tgtgacatca tgattgcaga gcctaactcc ctgtctcaac gcggttttgt
    35881 tgtcggcgga gggccagagc cgaaagtgag cgaaaggcgg atcgcgcgcg gggtaatctt
    35941 cccggcaaag ggggaaaccg cgcatgattc aggacgcatt tgtacggcag cgagcaaaac
    36001 agctttactg gcagggttac ccgccagcgg aaatttcgcg cctgatgggg attaatcaaa
    36061 acacggtgta tgcctggaaa aagcgcgacg aatgggacga aacgccgcct atccagcgcg
    36121 tgacgcattc tatcgatgca cggttgtgcc agttggccca gaagccgact aaaaccgggg
    36181 gcgacctgaa ggaaatggac gcgctgaccc ggcagttgaa aacgctgaat gacggccagc
    36241 cgggcaatgc cgcaggcggc aagaaacccc gccagcgcaa ggtgaaaaat cacttttctg
    36301 acgaacagat tgccgcgttg cgaaccaaca ttctcgactc actggcctgg catcaaaacg
    36361 gctggtatga gcaacgccac caccgaaatc gcatgatcct gaagtcacgc cagattggtg
    36421 ccacctggta ttttgcccgt gaagcgttat tgcgggcgct gcgtgatgac gtggcttacc
    36481 cctatcagcg ccaccagatt tttctttctg cctcgcgccg tcaggcgcac cagttccggg
    36541 gctttatcca gaaggtggcg gaagaggtgg acgtcgaact aaaaggcggc gacaaaatcg
    36601 tcctgagcaa cggggctgag ctgcattttc tggggacgtc tgccgcgacg gcacagtcct
    36661 acaccggcaa cctgtatttc gatgaatttt tctgggtcag taactttgcc aacttgcgca
    36721 aggtggccgg ggcgatggcg accctgaagg ggttgacgcg cacctacttt tccaccccat
    36781 cgagtgaaac ccatgaagcc tacccgttct ggacaggcgc acgctggaat gagaagcgca
    36841 gcaaggcgca aaaggtcgcg tttgatgtgt catggaaagc actcaatagc ggtttgctat
    36901 gcccggataa aacctggcgt cagattgtga cgctacagga tgtcatcgat catggctggg
    36961 aatacaccga cctggaagaa atccgcgacg aaaacagccc ggatgaatac aacaacctgt
    37021 acggctgcga gttcgtccgt gatggtgagt ccgcctttaa cctcaacctg ttatttagct
    37081 gcggtgccga cggttacgac gagtggccgg actggaaacc tttcgcgtca cgcccgatgg
    37141 ctgatcgcgg cgtctgggtt ggttatgacg ccaacggcag tagcggtaac ggcgacagcg
    37201 gcgcgatctc ggtggtggta ccgccactgg tggtgggcgg caaattccgc accatcgaaa
    37261 cccagcagat acgtggcctg gagttcgaag agcaggcgaa agtgatcgag gcgctgacct
    37321 tcaaatataa cgtgcagcat atcgccatcg atggcaccgg catcggcgaa gcggtctacc
    37381 agattgtgaa gaaattcttc ccggcggcgg tgtgcttcct gatgtcggtg tcatccaaac
    37441 gcgccctagt gctgaaaatg cttcaggtca ttcgtgctgg tcgctgggaa tacgaccgca
    37501 gcgagcaggc actgatcaac gcgttcaacg ccgtgcggcg cgtcaagacg ccaggcggca
    37561 tcatgactta cgacaccgac cgcgcacgcg gctctaatca tggcgatctg gcctgggcaa
    37621 ccatgctggc cgtcatcaat gaaccactcg gccaggagca gggcggcggt ggctttgcga
    37681 tggagttctg atgaaaagaa aagataaacc cggcgcccgt ccggcaatga cggctggtca
    37741 gccggacatg gccgccgctc tgaaaagcga tccggggctg agcgcgttta cctttgacgg
    37801 tccctatccg gtcagagacg gccacgacct gctggataac atgtattgcg ccgacaatgg
    37861 ccgttactac gacaccccgg tggactggta cgggctggcc cgcgcgtttg gcagtgcgtc
    37921 gtggcaccag tcggcgctgt acttcaaacg caatgcgctg accgggtgct ttatcccgca
    37981 cccgttattg tcgcgtcagg cgttctccgc cttcgtgctc gactggtttg ttttcggcaa
    38041 cggttatctt gaacgcaggg tcaaccggct gggcggcgtg ttggccctgc gtcacgttcc
    38101 ggccaagtac acccggcgcg gcagcgatct gaatacctat tggtttatcc ggcagtggaa
    38161 agatgaacac acgtttgata ccgacagcgt gtgccacgtc atcaacccgg atattcacca
    38221 ggagatctac ggtatgccgg agtacatggg cgcgctgctg tcggccagcc tgtcacactc
    38281 tgccgatatg ttccgcaagc tctactatga caacggttcg cacgccgggt gcattatcta
    38341 catcggcgca tcccaggtgg ataccgaaag catggataac gtgaagaaaa cgctgaagga
    38401 agcgcgcggt aaaggcgcgt ttaaaaacct gctgttacat gcgccgggtg gcggtgaaaa
    38461 aggggtacag attattccct tcagccagat atctgccaaa gatgaattcc tgaatatcaa
    38521 atcggtgacg cgcgatgaca ttctggcggc gcaccgtgta ccgccgcaac tgatgggcgc
    38581 tatgccggaa ggcaacggct cctttggtga tgtggagaaa gccgcgcggg tgttcgctat
    38641 caacgagctg atgccggtga tggaagcact gaagcatgtg aatgactggc tggggatgga
    38701 ggtgatccgt tttaatcctt acgccctgtt gaaagccgag tgataccccg ccgctgccgc
    38761 cgcactcacg cggcggtttt tattcaaaaa ctttcacgct gaccgcacac aatttctttt
    38821 cagatcaacg gctaacgcca ccatttccca cccacataaa accgcatcag cgctacgcca
    38881 tcgggcgctc tcaccggatg ccgcgtcgcg tctcccgaac gaaaatacgc acgcagcagg
    38941 ccgagaaatg tgccagattt ggcacatcaa aggggatccc tacctacccc ccgccgcgtg
    39001 ggctgttccc ccgtcacctg cgcgctgctc tcgcttcatt ttttgtgcaa gtgcagaaac
    39061 cggcccggcg cgcgtgcgta ccgggcggaa aggggaaaaa tagcatcaaa aaaattgtgc
    39121 aaaattgtgc gggtttgtgc ggcgcatttg gggtaaaaaa aacctgccga agcaggtttc
    39181 agagaaggtt agcgaatgga tgaaatccgc tctaatgctg cccgagcaag gaaccctgag
    39241 cggctcttaa attccgggtt actcgctacg cagcggtcaa tacggtcagg tcaatcagcg
    39301 acaccagttt ccatcaatct tgtgcgtaat gattttgaac cgttgcatga aattattttt
    39361 ttagttaaaa accttaattc aaaaagtcat ttaatgtttt tttgctttgt agtcttttat
    39421 aattttcttg atgtcgttta atagaacgtt aaatccggta aaatctattg tttttctttt
    39481 aggtttaact acatactcag caaaatgatt cttaccgtag tgtttgtcag tgtcaaaggt
    39541 acccttatag ctaaaggttt ttttctctaa tttttcgttt aatgttgcag tatcaaagaa
    39601 atcctcgatg gcactatccc cccctttaat taaaggagtt tgcataacgt aaaggttttt
    39661 tatgacgtga gtgaaactat cattgctaga gaagtttttc tttgtaattt gattaactaa
    39721 ggatctaact gcaggagcac cagagtcatt atcaattagt attatcacgg gttgggacag
    39781 agaaaatcta ttaaattcat cgcagtaact tgaataattg cttatcaaat tgcctatatc
    39841 tcctgtacca cctgtcactt taaataattc acttattgtt tttgtcggtc taaagaaact
    39901 aacttgcagt tcttttttta taattagaga gcggtgtttt gctgcctgtg actcaagtgc
    39961 acattgtagg taagttatat cagttttacc ttcacagaca atgaccggtt ttttattttt
    40021 tacgaaattt ttgaagaaaa ggacatctct atacattctg ctatcagcat cgaatatatc
    40081 atcaaatgtt tttttgttag gtttcttggg aatgatatat tcttcttttg ttgtgactct
    40141 atgctcacgt cttacgttgt gtatgtggct taaaatacca atcagatagt taatatcttt
    40201 tttaatttct ggctgggaat ttatagcata gatttctttt ccatttttaa gtttatgcca
    40261 tataacacga gccttgtttc tataatcgta gggcacattg acctttttat ttacgacaat
    40321 accggttacg tcctgtctgg agttgcagaa ctgaagtcta ttttttttgt gatttatatc
    40381 aaaaccacac tttttaatta ttccttcaag agaactccca atccttacgt ctccattttc
    40441 aatggatgct attcttggtg gaaattcttt taagttggtt gaaaatgtaa gatcatcagc
    40501 atagcgtgtg taataacaac tatatttttt tgcaagtgac gcaagtttta tatctaatat
    40561 tccagcaatt aaatttgata tcactggaga agttggcgct ccttgtggta atccttgctg
    40621 atagcaagta atatttgcta atactttagc aacttcgtct gataattgga agtgtttgtt
    40681 gtttttaaaa aagccataaa ctctcccata atggatctgt ccgaagaaat ctttcaaatc
    40741 aacattgaga acaaatcttt tatttttatg tggagtggca ttggttatta ttgatttccc
    40801 tttaataaaa ccatgtgaaa gagaattaat tttcttaaga tgattcctat gtccttccag
    40861 aatacaaaca atcctaaaac attcctgtaa tagagatgac actttctttt gaatgtcttt
    40921 taattctttg actggtgcat taattgttct ttcggagcca tcttttttag gtatcttaaa
    40981 agtatgatac ttggctaaat tcagcctatt tatgccatac agaacataag taattgactg
    41041 acgagggact gaaataattt ttgctaagtc tgttatattt tttgctgatt ttagttctga
    41101 aagtttattg tttttcgaca tagttttggt tttatttttt acaatagtga gttgaggtgc
    41161 tataggcact cattaagctc accggcaaac tgttatcggt gatcttaaaa cattgatggc
    41221 attccgccgg acattctttt cacatatcac gcttcgtgat aaaaaatctg cctatagccc
    41281 tcaacttatt aatattacat tgtatcgatt taggcaacta aaatttaagc atagaaagtg
    41341 ttgcgtttag tttggcaagg tattacgaaa acaggccgac atccgtatcg ttcagtgatt
    41401 agactcttca ataactgaat tttatggcat aagaaaaagc ccgccagaat ttgcgggccg
    41461 gaacatcaac ggttgaaact actgtcacgc atgtttcatt ctctcgttta gcgtctcgat
    41521 gatgaaggcg ttgacagatg tttcttgctc agctgcagcc tgattcaaac gctctccgaa
    41581 agactcaggg tagcgtaacg taaacgtttt aaccctttcc tgacggacgt atggttcaat
    41641 gcccgctgcg ctgcaatcat ccagatattc acgcagtgaa atctcacctt cttttttcag
    41701 tccctgaatg ctgtccgaaa caaaatcaca atagccggtc agacccataa acttaccacg
    41761 aaacgtgcca agctccggca catagctgat aacagccggt tgtccggcta tctcaatggt
    41821 gtttggtgta gatggtttgc tcatggtttc actcctatgc tttcaagcca gtcgcgcagg
    41881 ttagccactg cgcctttatc tgtatctggt gaaggatgtg ggcgatggaa gttagcgata
    41941 ctgccgttga ggagaaactt acaacgcgaa ccacgcccct ctttaacttc cccacccaga
    42001 gcctttatca gtgactctat atcggcccat ttgatacctg actggacagg ggatttaaac
    42061 acctgttcaa gcgtgcttct ttgccttttc cgtaatgatg aaacctgttc cttcattccc
    42121 tcgcctcacg acatcactct atgaagtcat tatccaaccc gccataaatg aagtcaaatt
    42181 atgaagtcat aatagtatat gacaatctat cattcttcct gatacccctc catccgcagc
    42241 cgtgctatcc agttgcttac agtagcggca acatcttccg gtcgacgttc tcgccgaacg
    42301 cgatacaggc atccgtcaga gcgtgaaacg tatagctgat ccgcaaaggt gagagtatgc
    42361 cccaacgcca gccgctggat ctcgatattg ctaatatccc agccgattga gcgggcgaaa
    42421 tcggcaatac tggctcgcca ctcgtccggc agtttgccaa ccacctgttt ttcagccgat
    42481 gtggtccgtt gagtagtgga cgagtgttga ttattccgcc gatccgtcgg ttgtgttcgc
    42541 aacctggaca gcagtgcccg gcgttccgag tctgtcatgt gctcgaagtc ggtggaaatt
    42601 cgagcgaatg tatcgccagg ctctccatct ggcgcttcac agctaccata gtcatccccg
    42661 tctatacctg acggaatggc tattttttca tcgcccgtag agttattgac agaactccaa
    42721 gcgtcgccgg tcggcgacgt aacggccaaa ccactcccgg tgccaatgct ggtaccatcg
    42781 tcagcggact gcttctttcg gattttccac ttgattaacc gggtgcagat acgggatatc
    42841 gcccccaaac gtggagagaa cacaccgaag attttttccg gtatctcgcc gtaggtgttc
    42901 tgttcgtcag catcttcata ggcaatgcgc acggtgtagc gctcgcgtgg gatcaacacg
    42961 ccaccttgct tttcgatgta tgtggcaaaa caaccggcgt cagccgatgc cagcacggca
    43021 tccattgccg ggtcagcaag ctgcgcggcc ccgcgtttaa acgtgccgtt ttctttctgg
    43081 gctgcggtaa gttggtttgc caggcgacgc agttcacgcc ataccgttac cggcggcaga
    43141 ccaaacggct gaaactgtcg gatgttatgt tgtgacgccc aggccatcgc aaactttgcc
    43201 gtttcgcgta atggcttgcc ggtttcgtta tccagctcgc catccagcgc gtaaccgtcg
    43261 atatttttac tgatgtactt cgccacgtaa gccgtagcgc tgccttttct tggatcgagc
    43321 tttttagcct tgaatcgtgc gccggtgttg cgccccagct ccgcacggtc ttcagcaata
    43381 aaatactctc gcaagatatc ggtgatggcc ttcctgtcgg caggtggcat aaacagcaac
    43441 acatgccagt gcggtgttgc atcgtggtgc ggctcggcaa cgcgaaagcc gtaagggcgc
    43501 aagccacgac gattcaacgc agacatggcc cgcgcccagg tgcggcataa ataccgctgc
    43561 ccctgacgag gagaagcatg atcccattta gggttttggt gaccgttctg gatgttagcg
    43621 tggtaacgcg acgggcaggt gatggtgagg aaaacacctt catcaccccg cgcgattgcc
    43681 accatttcaa caccggccat gcgagtcatc agctcatgac ggcggatagc cggattactg
    43741 atactgccgt acaccatgtt ttccagtgat gtgacgttgc catcttcatc aaccagttca
    43801 tgtgtctgga aaaaagcacg attcttgcgg cgctgctctt gccactggtt gagggcatca
    43861 aggctgacat acggcattct ttttttgtgg atcacgccga tggcgcgaaa ctgattttcc
    43921 cgccattcac aacgcagtcg ccacagtttc cgcccccacc attcaggtga agtaatgcgt
    43981 aaaatggcgg aatagatgcg gtgccgggct tgttcatcac cgatgaccag cccccagcac
    44041 ggtggcgtta cacgtaatgc cagcagttcg cgccccagat ggcgatacag ccactgaatt
    44101 tcattgtcgg tcatgttttc cggcgatgtg tggccgcact cggtttcaaa catttcggcg
    44161 atggcggccg caagggtatg cgcggcattg atcacctcat gcttggtaaa cccggccaga
    44221 tgcgcccaac gcggccccca ataggccgcc agttccgatg caaagccatc acgcacacct
    44281 tgctgtgcgc gcacagcatc cagacgcagc agggcttttt tcacggttcc catgaaaaag
    44341 gcgctgatgt gtcgcggctc gcggtttgca cgtagccatt caattttttg gcggtaaacg
    44401 tcacggataa aaaatggttg ttcatgcaat cgggcttcca cgccttccgg cgttttcatc
    44461 caaccgctaa ccgtttcctg atgatcccgg cgccctattt ctgccagagc gcgccggata
    44521 agcaactggg taccgttcgg ctcccggtga tccaactgtg ctacggcttg attaagattc
    44581 cggtcatcac ctggcgctgc caaagcgcgt ttaaccatcc ggctcagatg ccgtgtgacg
    44641 gccggatgcg gctcagcatc ggtaacgagt agagaggggc gaagatcagc cacgcccgac
    44701 ggtgcggaga tcgccgggcg tggagcgttc cagggatagg cccattcatg gcttgactca
    44761 tttcctgcac ataactgaag tgtggatgag cgccttccct tagactctct gaacatttat
    44821 aacatcacct tctgaagtct ttctgacaca acaaggccct catatggaac ataagtattt
    44881 caaggtgaaa aaagagctcg cccttccgtc ttacgatgaa gcgataacca aatggcttga
    44941 atttcagcct aaaacttcgc cattaattcc ttataagata ctaatatgta atgaaaatgt
    45001 tttttaccgt gagatcactt gtgatggact aggtgaatac gttgaagcat gtgaatttct
    45061 ccggtctctg gatcttgtag atgcatcgga atatgacttt ggcctaaggg gctatgattc
    45121 tgtgtttgtg agtcagaggt acattgataa agcctcttca actcatcgat agcatccgca
    45181 ggagtgcttt tttgtgaatg tttgatcacg gccagaacga gcattctggt ttcattactc
    45241 atttgatacg gcataattcc tcgcaagata gaatgtcatg cccactgttc aggcattcag
    45301 aacggctccg cgttcaacgc gccggatgcc accatttcct gataggtggc atcacccatc
    45361 actggcccac agtcagggca gtgcccacca ccttcatagc cgcacccgtc gcaaactttc
    45421 gacaggcttc gggcagcagg aatcggcaga cgcttagcaa tgatttcccc ggcctgcttg
    45481 ctctcaccag ccgcaacacc gacgctacgc ggcgcggtga aacggcagat atcaaacctg
    45541 tggtaaaggc tgtgtgcgtg gtgagtgtcg ctgttggatg caatgacagg tatcccacgt
    45601 tcggccaggc gtgataacgc gctgcacaag tcatactgat cgttgtgggt gaaaccatca
    45661 gtgtgataac tggtgaagct ggccgttggc gtttgcggga tatacggcgg atcgcagtac
    45721 accacatcgc cggggcggat cagttgcaat gtttcgccaa acgcagcgca gatgaatttt
    45781 gcacggcggg ctttttcggc aaatgcctga atctcggcca atggaaaata aggcgatgca
    45841 taatgcccgt aaggaacgtt aaacccaccg gcccggttat agcgacaaac gccccggtaa
    45901 ccgtgtcggt tcagataaag aaacagtgct gctgaggtgg tgcgattctc tttgctgcgg
    45961 ttaaatacct gacgaaaacg gtaataactt tcggctgtat tcgctgtgcg aaacagacct
    46021 tcggcggtat caataaactc cttcacatcc tctttgatga cctgatacag gttaatcagg
    46081 tcagggttga tatcagcgat caggtattcc gggtaatcgg tattcatcat gaccgaacac
    46141 gacccggcga acggctcaac cagacggtca ccggccggta aatgctcgcg caggatatcc
    46201 atcacgcggg ctttgctgcc gacccatttc agcggtgtgg caataatgct cataacgcac
    46261 cccgatagtg tttgtttttc agttcagcat cgccctggca gtacacgcac agacgcacac
    46321 ccggaacggc ctcgcggcgg gcttcgggga taggtgcatc acagctttca cagacgaatg
    46381 cagaaacggc acagcccgac tgttgccggg ccttctggat ttgcgtttcg cggatgaacg
    46441 cttcgcgctc ctgagccatg tcaatcgagt ccatcagctc agctcctgag cggagcgctc
    46501 aaaacgttct gattcctggc gtatcagttc caccatttcg gcggcggaaa ggtcgcgttg
    46561 ttgagcgcgg acagccagcg cagcaaggcg caatgagaag gaaaaatgct ggtctttgcg
    46621 ttcctccaat ctggcctttt tcagcagctc gaccaatgcg ccatcattgg cgacagtcat
    46681 ggtttttact tcggcatttt tcattgtggt ttcctttttt taggtaatag aaagcccggc
    46741 gggtttacgc ctaaaattgg tttttttatt acagtggaag aattaagttt ttggggaata
    46801 aactcacaac tgcgcggagc ttattcattg ctttaatcag cctttctttt tcgtcagttg
    46861 tcagttcatt aaatttcagg tgatgccgct ccttatcaat atccgctaat tcaaatattg
    46921 ccgacagtac gcgcatattc ttatggtaat cgtcatcaat cttgtcccgc atatcatcaa
    46981 taaagcggca catttctttc tcactgtttg tcttgaagtg tttccctcgc agcatggcta
    47041 tgtggtttag cccgtctgtt ctttccgcga tactcagcgg aatggcgcga gcgggttcgg
    47101 tattagccat gacgctacgc cgcaataccc ataaggcggg aaaaccagcg gcgcttttgc
    47161 ttaggtgctg gcatgtaggg cttttggctc cagggtgcga aatagacctg attaacggac
    47221 ggcttaacgc gctggccgtt tggtagttcc agccagcctt taccctgatt agggattact
    47281 ggtgatggtg actgagaagt taatagacga gctatggaaa tcatattatc gcctcgctgt
    47341 gtaaaggtta tcgatataac cggtagctaa tgtcagtgca tcaaataaac cgtaagactg
    47401 ccccgcctga ctaacacgat atcgggtaat cgggtttaat gttgtgcgcg ggcatttaat
    47461 aattgagaag ccccgatata catttgtgtg tttgcttaat tgtgtaatgg cgtattggcg
    47521 gcctgatttt ttattcttca tgtcacccct ttcgtgctct tttatttgcg ctaatacgat
    47581 ctttccaccc atgccattct ggcggcgcgc catccaccaa ttgtgccgca tagctatccc
    47641 attcacggcg gttaatccac aattcggcgt ggccgcctgg gtttaatggg tctgccatgt
    47701 aaaaagcggg caatttcccg gcttttgcca tcgcgacaat cgcggctgga gtttttccga
    47761 cgtacagcgc aaaaccctct tttgataaaa gatcggctgg tttctctgac aatcgaatct
    47821 ggcgacgtga ctcaacgatt gacgaatcat ccatgttatt attttccccc ttcaggtcgc
    47881 agccccagcc atagcagcca tgcgtcacgc tgttcttctg gtcggttcat aaacgcttcg
    47941 cgcatagcgc ggttaaattc cgggatataa acccaatttt cagcgcggct aggatttgat
    48001 ttttcaggat tcacccacgg aacaagcggc aatttgccct tatcaaccat ggcttttact
    48061 gccgcttccg atttaccgat cagttccgca aatttcggat atggaacagc atcaaccgga
    48121 tagcgaacct cataaacgcg ttcacccatc acaaacctca ctttttattt tgcgttattg
    48181 aatatgtgcc ggggttttta gccacgcccg gcgcgtggtc tgtggtactc tctttacacc
    48241 caccaacctc tggcaagagc gtgggcgtaa cctctaccaa caaaaggact tatttatgtc
    48301 tgataatgtg tttatcacta aagaaacaaa tgaaattatc aaggccgctt taactggtga
    48361 taatttcaat aatttgttaa ttatcgttgc caaccaatta ccgctccgca atggtgcagt
    48421 gcgtgaccac tactccgtcc gttatgatga attttattcc gccatccatg atatggttaa
    48481 gcaatcttta aactataagc ccactgatac cgagagcggt acgaattaac ctaatcaatt
    48541 gaacttcttg gcggctaata tccaatcctt tatcactggc cgcttttttc atttccttta
    48601 ttgcagattc agcaattgac aataattctt cactattcgc ccctctgctt ttatcgccgt
    48661 gttcattcct tttttctgca acttcggaat agtccaccac aaataaatca acgtcagagc
    48721 tcatccgcgc taactctgct tcaacagcat caatcttagc ccgcaattct tcaggccgtt
    48781 tcttgaggta ttcgcgggtc tccaactttt cggccagacc ttttaggaat ataaccaatt
    48841 cctggtcatt aaaatctcca cgaatgatac gcggttgtgt tttattctca ccttccatcc
    48901 gttcacccct cccccttacc gtgatactct cttccgatca ccaaccgctt acatcggctt
    48961 tcagttgctt atgttcgcgg ttggtttttc gtgccttcat tgtttcccat ataggaacaa
    49021 catgaaggaa atctacatcc taaataggaa caaagtcaaa tgaaattgag cgagaaaatt
    49081 cgcgcgataa ggatggctga ggggctaagc caaaaccaac tttgtgaaat catagattta
    49141 tcaagaagta ccttagctaa gtacgaaacc gggttgtttg aaccaggggg aaacgcattg
    49201 gtgaaaatca caatgcatcc acggtttcaa aaatacaccc tgtggttaat gacggataaa
    49261 acagcaccgg aagctggtca gatcgcaccg gccctcgcac acattgggca agacgaaaca
    49321 aaatctcacc aatcaaacca gaatgttggg taaatattta cattagttac atctttgata
    49381 ttgcatatca ggatgatgac tacatcggag agtgttctta tggcaattaa gaaactcgat
    49441 gatggtcgct atgaagtgga cgttagaccg cagggtgccg agggaaagcg catcaggcgt
    49501 aaatttaata ctaagggtga agcgcagatt tttgaacgcc acatccttgt gaattaccac
    49561 aacaaagact ggattgagaa accagcagac cgccggaaac tctcggaact gttggcgtta
    49621 tggtgggtgt atcacggcaa aagccatgcg cgaggtgaga tcgagcatgg gaggctaaaa
    49681 accatcattg cgacatttga agagatgggc gtttcacagg cagatcaatt aaccaaaaaa
    49741 gccatcatgg attatagggt aaacatgctg aacaatggat taaaggcatc cagcgttaat
    49801 cgccaccatg ccatcttaag tggtatgttt acaaagttaa ttgacgcgga agaataccac
    49861 tgccctaacc cgttcaaaga tgttaaaccc ctcaaagaat cgctgacaga aatggcgttc
    49921 ctgactgcat ccgagatccc cgagctgctc agattattag aaggtgatga attggacgcc
    49981 gttttggttt gcctggcaac cggaggaaga tggagtgaag tggccaacct gaaaagtgaa
    50041 cacatcatca acaatatggt gacgttcatg aaaacgaaaa acgggaaacg ccgaactatt
    50101 ccgatttctc aggaactgac gaaccgttta aaacgtgtga aatcaggcta tgttttcagg
    50161 ccaaactaca gaaaggtaag aaatacgctg cgtgcaatga aacctgattt accggaaggt
    50221 caggcgttgc atgtctttcg gcatacattc gccacgcatt ttatgatgaa tggcggtaat
    50281 attgttacat tgcagcggat attagggcac tcaacgatcc agcaaacgat ggtctatgcg
    50341 cactttgcac ctgacttctt acaggacgct gtgacgctta acccactaaa cggagtgtcc
    50401 atataatgtc catgaaccag cactatttag cactaattgg tactttatga atagcgtaac
    50461 aggttgtttt tcaaatgaat cccccgccga tgcgggggct accaagtcag ttattggtcg
    50521 cattcactct ttcgaatcct gtggcaccgt agacggcccc ggtattcgct tcatcacctt
    50581 tttccagggg tgtttgatgc gttgcctcta ctgccacaat cgtgatacct gggataccca
    50641 cggcggtaag gaaatcacgg tggaagagtt gatgaaggaa gtggtgacct atcgccattt
    50701 tatgaatgcg tccggcggcg gtgtaacggc atcaggcggt gaggctattc ttcaagctga
    50761 attcgttcgc gactggttcc gtgcctgcca tgagcaaggg attaatacct gtctggatac
    50821 caacggtttc gtacggcgtt acgacccagt aattgacgaa ctgctggatg ccaccgacct
    50881 ggttatgctg gatctcaagc agctcaacga cgagatacac caaaatctgg taggggtatc
    50941 caatcaccgt acactggatt tcgcccgtta tcttgccaaa cgcaaccaac gtacctggat
    51001 tcgttatgtg gtcgtgcctg gctggagtga tgacgatgcc tccgctcatt tgctgggcga
    51061 gtttacccaa gggatgagta acattgaaaa gatcgagcta ttgccctatc acgaattagg
    51121 caagcacaaa tggacagcca tgggcgagga atacaagctg gatggcgtga agccgcctaa
    51181 agccgacacc atggatcgcg ttaagtccat tctgaccagt tacggccaca aggtggtgta
    51241 ttaatcggta agcaccaccg ctcaagacag ggataatccg cctgccttgc tgaccagccg
    51301 gggttaacgt catctgctga cgcactctgg ctggctatcg ccaccctttc cccttcctcc
    51361 atttgctggc cgatcccgtt gtcatcgccc gcaggcatca cagtttcctc gttcgtcacg
    51421 tgtcacaatc cgaagcaagc gcgcacgata aaaataaaac atgataacga tgatgtgaca
    51481 gagagcagcg cgccactcaa tgagacaaga tggagaaact cagggcgtcg tgcatcacac
    51541 attgtgggac gtcgactcgc tgcagataaa gcgagcggta tacgccacag aaaaaagaca
    51601 ttgaacacaa tggacggtgt tcaatgctaa ttgaaccagc ttatactcaa agtaatcaca
    51661 catcaggacc agcgctcgcc cacgcagaca cccgcacagc gcgagaatag cgtgatactg
    51721 acagcgagcc agtaacctga attacgctgg gtatttgtac ttcagggaca cattatgcgg
    51781 ctcgataaac tggaaattcg ttggctgaaa ctattctgta agattgttga gaataaaggt
    51841 atcaccaatg cacaggaggc cactggtctg agtcagccag tgctgagtca ctacctgtca
    51901 cgactagagg acacgctagg gctgattctg tgtgagcgcg gccgcggtgg attttccctc
    51961 acgacagagg gtgagttggt ttatcaggaa gcgcgttcgg taatcgctac actggatgat
    52021 tttgccaatc gactggctcg tatcaaacat gagctgattg gtgaggtgag actgggctgt
    52081 ctggataata ttgtttcgca tccggagcga gccgttccgt tagccatacg ccgcttactt
    52141 gagttaagcc ccgatgcatc catgaacctc tacgttagcg accatcagtc gctgatggag
    52201 cggctacgca acagcgagct ggatgtcgta ttgaccgtcc tgccagacga tgtaccacct
    52261 gatattttct tccagccagc gtttattgag cacagctcat tctatgctgc tgcagaacac
    52321 gctggacgta ttgaacagga atggcgtgac ggcaccctta acccaaagcg gttattggtt
    52381 ggcggctacg ccatgaacga gatgtgcaaa caactcgggt cggtagccaa acaaggacag
    52441 caaagcattg cctgtagcga ggaaggttgc atgctactga ttttggctgg cacccacgtg
    52501 ggctttttgc cggaccatta tgcttcacgc tgggtgctgg aaggcatgct gacggccatt
    52561 gcgccggaaa acctgcggct caacagtatt ttttatctgg ttcgcaacgc cagacagcga
    52621 ttaagcccgg tggctgaagt cctgtggaac aacattgccg aaatcgggca actttcgcca
    52681 gcctatcgtc gacgccgatt gtaagtcagt cggcacggca gtcacctcat accgccagtg
    52741 gtcgggggtg atggtcggct tttttcagca gaataatcaa ataccctaga gagaccgctg
    52801 caatcagcac aaacagtaac ttatcggaat aggtttgcat cagcatggcg gcaaggctcg
    52861 gtccgcacag gctgccaatg gtatagctaa gcagtagagc ctgattcatg gcgaccagct
    52921 cattgggtgc caccttctcg caagcccacg acattgcgac cggataaagc gtaaatccgg
    52981 cggcaccaag cagaaacagt gacgacgcca tgctataccg ccccggaagc agtatcgcca
    53041 gcgaaccgag gatcacggca aacaccagca ctcgcagcac cagcaatcta ccgtagcgat
    53101 ccgccattcg tccgacgggc cattgtccga gaatacccgc gctgattaat aacgccatcc
    53161 agtaaccgac actggcgtca ctcatcccct gatgagccag atacagcggc atcaaaccat
    53221 acagcgaccc cagaatgatc ccggaaatca cacacccttg aatccccagt agtgcggtgc
    53281 gatagcgtag catccgccag acgttgacac ggtgcgtaac gggctgaggg ggcgggatgc
    53341 gggcaaacag taacggcaga gcagccagca gcaccaacgc caccagccag ggcagaatac
    53401 tgaacagtgc ggtagacacc atactcagga gcaactgccc aacaacgctg cccaaatagt
    53461 aggccatcat gtacgcggcc agcaattgcc ctcgattgag cgcgttaccg ctgcacagca
    53521 gcgcgctttc tactacaacc caaatcagcg cacaggcaat cccggcaaca aagcgccaca
    53581 aaatccagct cccgatatcc ggcgataatg ctaacgcggc cgtcgcaccg ccaaacatca
    53641 gtactgccag gtagtaactg cgattaaaac cgctgtatcg aattaacctg ccagccacca
    53701 gcgtacccac caaattccca ctgaaatagg ctgaccctac aacgcctacc tgccagaccg
    53761 gcaattgacg atcattgagc cataacggca ccagtgtatt taacacggcc agacaaacag
    53821 taagcagcaa cagcccacag agcaacagca gaaccgggcg tgtataggtt gacatggaaa
    53881 ggcaaaccga aaaagagagg atattttggg cgcatcatgc cactgacaat ggcaaagtca
    53941 atcgccttct caccggctgt cgcacatttt gtccatgcgt cccgattgcc ggccgatacg
    54001 gtgccttggc ggacatctca gcgccgggct acacgcttcc attccagatt attaccgaac
    54061 cactccgcca gaaaatccac cagcgctcgc aacgcaggcg acattctctc acgcgagtga
    54121 tacaccgcgt aaatatccaa ctcttgcggc tgtgattccg gaaatagtgc aatcagccgt
    54181 ttactggcga tcagatcggt aacggaatag accggttgta aacttactcc agcgccattt
    54241 agcgccgcct ccagcaacat caacgaatca ttggcgctga aactaccgct gaccggtacc
    54301 gctatcgtgt ctcccttacg ggtaaactgc cacaggctct taccgaagaa cgaataggtc
    54361 aggcaattat gtacggccag gtcttccacg cgctgcggtg taccgtgcgc cgccagatac
    54421 gaaggggctg cacacacgac cgacggacag cctcccaacc gacgggcaat taaccccgaa
    54481 tctaactgac tggtgatacg aatagccaga tcgatacgct cctcaatcag attcagggta
    54541 tggcttgcaa cctgtaggtc aaccgccgtt ttgggataac gcagcagata agtcgtaatg
    54601 gctgcaacca acgtcgcctg cgccagtgac ggagaacagg tcagccgcag taaacccgca
    54661 ggctccttcc tgcctttggc tggcatatcg agtttgtgcg atacagccaa caactcacgg
    54721 caatgctgca acaccgtttc gccctcatgg gtcaggctga gttgccgggt actgcggtgc
    54781 aataatcgag cctcagccca gcgctccatt tcagccagat accgggtcac catcgcacgg
    54841 gacatctcca gcgcgtcggc agccccagtc aggctacctt gttcggtgat agtgacaaat
    54901 acctgagcgg cggtgattct atccattact tgtccgattt atgcaacaaa gacgaccgaa
    54961 agtgaggatt tttctttatg aaaatgaaat ttatcatgac gtcctctcat tcaggaagga
    55021 gtattcccca tgttaaaacg caccctgctt gccacgctgt tagcgtctat ggcattttcc
    55081 gcttccgcag cattaaaaat ggaagtctat aaccccggag caaaatccct cttcccggtg
    55141 tcgtctgaaa tcatcaccgg ggaacatgat gccttactca ttgatgccca gttccagcgt
    55201 aacgacgccg agaatctggt ggcaaaaatc cacgctactg gaaaaaaact gaagactatc
    55261 tacatcagcc atcatgaccc ggatttctat tttggtctgg atgtattgaa agccgccttc
    55321 cctgatgcgc agattgtagc cacaccacaa actatcgcgg ccatcaacgc gactaaagac
    55381 aagaaaatcg cctactgggg ccccatactg aaagaaaatg caccgaaaca ggtcatcact
    55441 cctcagccgc taaacaccga tcacctgaca ctcgaaggca gcaacatcga tatcatgggt
    55501 ctgaaagggg caacgccgga cagaaccttt gtctggatcc cgtcactgaa agccgtcgtc
    55561 ggcggcgtgc aaacctcagc caatatccat gtgtgggtcg cggataccca aactaccgcc
    55621 tcacgtcagg cgtggttgag cgatctggat gctatcgata agctcaaccc aaccacggta
    55681 gtacccggtc actacctgcc taacaaggat ggctcatcac cctggtcact gcagaatgtg
    55741 agttttaccc gggattacct gaaaaccttc gagaagaaca ttccgttgtc ggcgaatagc
    55801 actgcgctgg ttaagtcgat ggaactcgct tacccggatc tcggtgaagc cgcctcgctg
    55861 gaactgagcg ctaaggtcat caaaggcgaa atgcagtggc cttaatattc accggataat
    55921 atctgcggtt gccgcgacac ggtccaccgt gatgcctggc ggtggggact tttctttcag
    55981 gtttgcgatc tgtgatcgca gaaccagaag gataaaatga caccaccgcc tgctaactct
    56041 caggaaatag acaataatta agacagagcg tcacacaggt agtcatagca ggccactctg
    56101 gcaattgctc gggaaggttt gtggcgcgat aaccagtctc tttccctttg ctgatgtgcc
    56161 ccatccatcg ggcaacatac ggagcgtatg aatgaacagg ctacactaca tcttcgatcc
    56221 tctgtgcggt tggtgttacg ccgcagcgcc gttaatccat gcagctcgca aaattgaagg
    56281 gctgcctgtt gtgctgcacg ccggtggcat gatgaccgga ccgaaccggc ggcgcatcac
    56341 gccggaatgg cgggattacg ttcagccgca cgatcgtcgc attgcccaga tgagcggaca
    56401 gccattcggt gatggttatt tcaatggcct actgtgggat gttaccgcaa cgctggattc
    56461 agaaccccct acaacagcca ttctggcagc cgaggagctc ggtggccggg gaattgattt
    56521 actcgagcgt ttgcaacgcg cccattatgt tgaagggctg tgcatctccg aaacatcggt
    56581 actactgaaa atggcggtag aaattggttt gccgctggaa gactttgaaa acgcctgcat
    56641 acactggcgt ggtttaccca cccgtaagca cattgaggaa agccgccagt ggctgaccca
    56701 atcaggcggt gccggtttcc ccaccatcgt tttcgcggta gacgatattt ttaccacgtt
    56761 gaacatcgcg ccctggctgg ggcgagcaga cgactggcat aactacctgc tcaaactggt
    56821 agaagagaat cagtagccca cattcaaccc gctatttcat gaacaacgct atcagaaaca
    56881 gcgggttgct ccagtccaga cgaggcatct gatttttctt ttttcgccgg gcatgatatg
    56941 ggatggtagt cctttcatca gaaaagcaca cagggcgatc taatgattcg agttcatcat
    57001 ctcaatacct cgcgctcgca gcggatttta tggcttctgg aagagttgga tgtgccgtat
    57061 gaagtgatca attaccagcg taataaagcc acgatgcgcg caccggcctc gttacgcgat
    57121 attcatccgc tggggaaagc accggtcatt gaacacgatg gcaaggttct ggcagagacg
    57181 ggactgattc tggaatatct ggttgcgaca tttggcccgc atctggcacc gcccgctgat
    57241 agcccggatt tc
//
