# Supplementary material for: May the Phage be With You? Prophage-Like Elements in the Genomes of Soft Rot Pectobacteriaceae: Pectobacterium spp. and Dickeya spp
Source: Front Microbiol. 2019 Feb 14;10:138. doi: 10.3389/fmicb.2019.00138 (PMC6385640; doi:10.3389/fmicb.2019.00138)
Supplement: Supplementary file 2 [file Data_Sheet_2.ZIP › Supplementary_prophagesGENBANK_files/Genbank FILES _SRP_prophages/phiDze6.gb]

LOCUS       Exported               39665 bp ds-DNA     linear   UNK 02-AUG-2018
DEFINITION  phiDze6.
ACCESSION   .
VERSION     .
KEYWORDS    .
SOURCE      phiDze6
  ORGANISM  phiDze6
REFERENCE   1  (bases 1 to 39665)
  AUTHORS   .
  TITLE     Direct Submission
  JOURNAL   Exported Aug 2, 2018 from SnapGene Viewer 4.2.3
            http://www.snapgene.com
FEATURES             Location/Qualifiers
     source          1..39665
                     /organism="prophage phiDze6"
                     /mol_type="genomic DNA"
                     /note="/genome_id=6666666.356857"
                     /note="/genome_md5="
                     /note="/project=robertczajkowski_6666666"
                     /db_xref="taxon:6666666"
     CDS             1..1833
                     /codon_start=1
                     /product="Excinuclease ABC subunit C"
                     /label=Excinuclease ABC subunit C
                     /db_xref="SEED:fig|6666666.356857.peg.1"
                     /db_xref="GO:0003677"
                     /db_xref="GO:0004518"
                     /db_xref="GO:0005622"
                     /db_xref="GO:0006281"
                     /db_xref="GO:0006289"
                     /translation="MTDCFDAQAFLKTVTSQPGVYRMYDASDTVIYVGKAKDLKKRLSS
                     YFRAHVASRKTEALVKSIRQIDVTITHTETEALLLEHNYIKRYQPRYNVLLRDDKSYPM
                     IFLSGDTHPRLSVHRGAKHAKGEYFGPFPNGNAVRETLMLLQKLFPIRQCENSVYRNRS
                     RPCLQYQIGRCLGPCVNGLVSEEEYQQQVDYVRLFLSGKDQQVLTRLIERMEAASHALK
                     FEEAARIRDQIQAVRRVTEKQFVSGDGDDLDVIGVAFDAGMACVHVLFIRQGKILGSRS
                     YFPKVPGGTELAEVVQTFVGQFYLQGSVSRTLPSDILLDFSLPEYQLLAESLTEQAGRK
                     IQIQTRPRGDRARYLKLARTNAHTALTTKLSQQSTIQQRLTALASVLGIEKINRMECFD
                     ISHTMGEQTVASCVVFNADGPLRSEYRRYNITGITPGDDYAAMNQVLRRRYDKSIDESK
                     IPDVIVIDGGKGQLAQARDVFASLHVTWDTTRPVLLGVAKGSDRKAGLETLFFEATGEG
                     VALPADSPALHVIQHIRDDSHNHAISGHRKQRAKVKSTSSLETIEGVGPKRRQMLLKYM
                     GGLQPLMNASVEDIANVPGISHALAEKIFHALKH"
     CDS             1891..2439
                     /codon_start=1
                     /product="CDP-diacylglycerol--glycerol-3-phosphate 
                     3-phosphatidyltransferase (EC 2.7.8.5)"
                     /EC_number="2.7.8.5"
                     /label=CDP-diacylglycerol--glycerol-3-phosphate 3-phos
                     /db_xref="SEED:fig|6666666.356857.peg.2"
                     /db_xref="GO:0008444"
                     /translation="MRFNIPTWLTLFRVVLIPFFVLAFYLPFSWAPMVCAGIFVFAAVT
                     DWFDGFLARLWKQTTRFGAFLDPVADKVMVAVALVLVCEHYHSWWITLPAATMIAREII
                     ISALREWMAELGKRSSVAVSWIGKVKTTAQMVSLVGLLWRPEPMVEAAGVAALYVAAVL
                     TFWSMFQYLSAAWRDLLEH"
     tRNA            2581..2653
                     /product="tRNA-Gly-GCC"
                     /note="/transl_table=11"
                     /db_xref="SEED:fig|6666666.356857.rna.1"
     tRNA            2686..2756
                     /product="tRNA-Cys-GCA"
                     /note="/transl_table=11"
                     /db_xref="SEED:fig|6666666.356857.rna.2"
     tRNA            2768..2851
                     /product="tRNA-Leu-TAA"
                     /note="/transl_table=11"
                     /db_xref="SEED:fig|6666666.356857.rna.3"
     CDS             2921..3034
                     /codon_start=1
                     /product="hypothetical protein"
                     /label=hypothetical protein
                     /db_xref="SEED:fig|6666666.356857.peg.3"
                     /translation="MPVIWQVATKWRQSGSTRFSGTKKTAFNQPPLLTVVE"
     CDS             complement(3082..3303)
                     /codon_start=1
                     /product="hypothetical protein"
                     /label=hypothetical protein
                     /db_xref="SEED:fig|6666666.356857.peg.4"
                     /translation="MARTRTSRRLSDITIRQYHQCQNLECSETFTTLNTVERRVSKRTR
                     EDPLPPDFIPQDAFPASHYGRDQLNLAL"
     CDS             complement(3367..4506)
                     /codon_start=1
                     /product="Gene D protein"
                     /label=Gene D protein
                     /db_xref="SEED:fig|6666666.356857.peg.5"
                     /translation="MAITDLADSLITTAKRYDDALTEAVKSPNFSITLGGKSLKELSDR
                     LISLSLTDNRGFEADQLTLSIDDSDGRVELPPRGARIALSIGWQGEALTYKGLYTVDEI
                     SHEGPPDVLGVTARSADFREEFNVKREVSWHDVTVERVVSAIAHRYGMKAQISDMLMNI
                     EIDHADQTEESDMSFLTRVAEQLGAIATIKNGTLLFILPGGGVTASGKALPSASITRSS
                     GDGHRFRIADRDAYTGVRAYWLDLKFGKKKKVSVKRRRTKPKPKKEKSSSREGDYITGA
                     EGNVFVLRKTYQNEEVAKRAAAAKWRQLQRGAAEFSITLARGRAELYPEMHLTVSGFKP
                     DIDNQDWIIARVEHVIDGNGFTTRLELEAKIPDWIAESE"
     CDS             4528..4647
                     /codon_start=1
                     /product="hypothetical protein"
                     /label=hypothetical protein
                     /db_xref="SEED:fig|6666666.356857.peg.6"
                     /translation="MISRARVGKNGFLLSPDGQTRQRVSVRRISGIIAMNSIT"
     CDS             4659..5837
                     /codon_start=1
                     /product="Major tail sheath protein"
                     /label=Major tail sheath protein
                     /db_xref="SEED:fig|6666666.356857.peg.7"
                     /translation="MSETRFHGVRVRENTDLVTAINDIDSSVIGVVAVAEDADADTFPL
                     NTPVLITRVNSVLGKAGKTGSLYKTLKAISDQTSPKVIVVRVAAATEGGDKTQSQLIIG
                     GTAADGSYTGMYALLTAEAKVNYRPRILAVPDYDTAEVTSALCVIAQNLRAFVYACCHG
                     CTTMAEAITYRAQFAYRELMLIWPDFIAYNPLSGSNETFPASAYACGLRAAIDNDQGWH
                     KSLSNVAVNNVLGISRDVFWSLQAEDSDANELNNQEITTLIKRNGFRFWGNRTTDTHDY
                     LFEVYTRTAQILADSIAEAQFEAVDEPLTPANVKDVVNGINGKLSALVTAGRLIGGECW
                     FDIQDNPTTGLRQGQVRVRYKYTPVPPLEDLTLYQTFTDDYFDSAFSSLGGV"
     CDS             5838..6401
                     /codon_start=1
                     /product="Major tail tube protein"
                     /label=Major tail tube protein
                     /db_xref="SEED:fig|6666666.356857.peg.8"
                     /translation="MAVPHKLRLFTCFVNGNNQIGKVTSVTLPKLTRKTEDFQGAGMIG
                     SVAVDLGMDSGALEAQMVVGGMEKKLLLEYGGDIDDVRLRFAGEYYTDGDSQLVEVEMR
                     GRITEIDGGESKQGEDTSVTYALKNTYYKLSIDDQSVLEIDLLNFIYKKNGKNIYPDRI
                     TSALGWVTEQPESWRPQAARSLSP"
     CDS             6365..6715
                     /codon_start=1
                     /product="putative phage tail protein"
                     /label=putative phage tail protein
                     /db_xref="SEED:fig|6666666.356857.peg.9"
                     /translation="MAATSRPEPVTMNTPNEHTVTLATPIVRGDNAINQVSITDDIKQA
                     GSLRGLRLVNVLNMDVDSITTLLTRVTSPKLKLAEINAMDTRDFMRLAEAITPFLVHAE
                     PGEPNAEATEEA"
     CDS             6721..6879
                     /codon_start=1
                     /product="hypothetical protein"
                     /label=hypothetical protein
                     /db_xref="SEED:fig|6666666.356857.peg.10"
                     /translation="MQFDQIDDLVADIAVVFNWPPSELFSMDLGDVIAWRARAAIRSGA
                     SEADEKP"
     CDS             6866..9838
                     /codon_start=1
                     /product="Phage protein"
                     /label=Phage protein
                     /db_xref="SEED:fig|6666666.356857.peg.11"
                     /translation="MKSLDIRVAFSAIDRLTRPVNAARQSAGGLSESLKRTQAAIKDLD
                     NQSRTFNRLRDSVQKTSRKIDEASRSLDGLKKAQQNNTVLTDKQREHMAALAAKLERLN
                     VTRDQEMVKLRAASQALRGHGVSLVGSNATIQSAIRRTEQYNQTLERERRQLAAVTQAR
                     ARYERMQQTAGKLRGSGTMAVAGGAAVGYAGGQFLAPAVGFDEEMSRVQALTRLDKGDQ
                     QLAALRAQAKKLGAETAFTTRDAASGQAFLAMAGFTPQAIQAALPGVLNMALAGGMELG
                     ETADIGSNILSQFNLDASQMDRVGDVLTGTFTRTNTDLSNLGETMKYAGPVAAKLGISL
                     EDAAAMAGMLANNGIRGSDAGTAMRASLARLASPPKAAAEALKELGVSVADAKGKMRPM
                     QDVLRDLYKATKKYGQVDQVSFFKDIAGEEAFVGLQTLVQAAGSGALGKLSGELKKAKG
                     EADAVAKKMADNLGGDLKNLDSAWEGFRIQVEETTDRSLRSLTQGLSDVITTVSNWVRE
                     NPRLTQTLLLAVGGAAAFAVAVGGTSLAIGLLMGPLTKLQLGFSLLLGSRGVGGAVSMF
                     SGLGSLLGGPMARMGGWLQLFSGSTGRLTATLTPLRGMLLAVFTSPVSALGSLVRGVSG
                     LLLRLSGLPVLWSLISGAVSVLGGVLSLLLSPIGLIGAAFVAAGLLIWRFWEPIRTFFS
                     GMFTGIVISLGPIRQAFTGLAPVFDVTVSAVSRLWDRFTQLFQPIQTTKKTLDDCAIAG
                     YGFGKVLGSALEMLLLPLQKLMEGIGWILEKLGLIPSGLDAAQKKADQLKELTPEGKDR
                     LQGLVANLTGDLKEATTAPPPAPKPPLTGDSGTQRRLQKIADNTGGVLEETKKRIGPGD
                     IVFKNLPKALAVRGEWQESRLTGGTPSAPSQPAQTMQALSDRPAVVAATQPIKQADAAP
                     VSRPASRAPAAGGFNGEIHIHLHGVERQDARELGRIVADAVGAELARRDRLQRGSFRDR
                     E"
     CDS             9851..10360
                     /codon_start=1
                     /product="Phage tail protein"
                     /label=Phage tail protein
                     /db_xref="SEED:fig|6666666.356857.peg.12"
                     /translation="MMMVYGLFVFELQTLPYQQLQQSRAWRHVKNERINRSAKWQYIGA
                     GEDQITLSGVLYPEITGGEVSLTALTTQAYSGRPWPLIDGTGQIYGMYVLTGMQTTRTE
                     LNRYGKAKKIEFSLSFQRCDEDLREKLQSSSFSDLMDNARSSANKAMNTVSTAMTDTVN
                     TLKGLV"
     CDS             complement(10389..11012)
                     /codon_start=1
                     /product="Tail fiber assembly protein"
                     /label=Tail fiber assembly protein
                     /db_xref="SEED:fig|6666666.356857.peg.13"
                     /translation="MSEKYSVAVQGAQLGKNGLAERAGWLTVYHVDPPTREYTSASYEY
                     LMVGTGLPADSYADAPDLPTVGQALRRSADGAGWEHVPDLRGKTAYRTADGQPQTVTAL
                     GELPDGLTLFSPSTAFDKWNGETWVTDVAAQHAAEVAAAQQEQAARKATATARITELVY
                     AADLGIATDAEQTALTAWKTYLVQLSRIDTAAAPDINWPEIPST"
     CDS             complement(11012..12274)
                     /codon_start=1
                     /product="Tail fiber protein"
                     /label=Tail fiber protein
                     /db_xref="SEED:fig|6666666.356857.peg.14"
                     /translation="MTTKYFALLTNTGAALLANATALGRQLPITQMALGDGGGTLPTPD
                     PAQTKLINERRRAPLNSLSVDPANPSQIIAEQVIPEDEGGWCIREIGLYDANGNLIAIA
                     NCPETYKPQLQEGSGRVQTVRMILIVSSTDAVTLKIDPSVVLATRAYTDTKAAEAKAYA
                     DGQASSAKGESQLYTDNQISGVKTETKSYTDALINGVKGEAKSYSDAQTSSAKIEVKAY
                     ADNLITAHLSTANPHPQYALSTDVTAANKLKLDIAEIVGIPLPWPQATAPTGWLKCNGQ
                     AFDKTLYPKLAGVYPTGVLPDLRGEFIRGWDDGRGVDSGRTIISKQNATGLRTGAMDYN
                     GSDADSTGVYIGIGYADADSSANTVNFTNQGYPNGVLMSGGAGKDNGVSGTASNTVFSS
                     GVNWITVRPRNVAFNYIVRAA"
     CDS             complement(12271..12879)
                     /codon_start=1
                     /product="Tail protein I"
                     /label=Tail protein I
                     /db_xref="SEED:fig|6666666.356857.peg.15"
                     /translation="MSNSLLPPSASDFMRHVASSTQRLSEIAVDMDTLWDAERCPAQLL
                     PYLAWALSVDRWDKRWSEQTKRQVIKAAWLVHRQKGTIAALRRVVEPFGYLIRITEWWQ
                     TGGVPGTFRLDIGVQDAGITEETYLELERLIADAKPVSRHLLGLNIVMDCAGDIPLAAG
                     QYSGDALTVYPYFPETITTTGADRCGGAIHLSDNVSVNT"
     CDS             complement(12872..13768)
                     /codon_start=1
                     /product="Phage baseplate assembly protein J"
                     /label=Phage baseplate assembly protein J
                     /db_xref="SEED:fig|6666666.356857.peg.16"
                     /translation="MATVDLSQLPQPQIIEVLDFEVILQEVKAVMITAFPGAQQASVTA
                     ALALESEPLTVIAQVIAYREMMLRQRINEGAEACLLSHAVSSDLDNLAANLNTQRLTIT
                     KATDTADAVMEGDSALRLRAQAAFEGLSVAGPTGAYEYFAKSASGQVADAKAISPSPAV
                     VVVSVLSTEGDGSASADLLATVDAALSADDKRPVGDRLTVQSAEIVRYAITAVLYRYPG
                     PESEPIQKAAQQALTSWLGTQGRIGRDVARSAIMAALHVQGVQRVELLEPAQDIVISDT
                     QAAYCTGFTVTEGGSDE"
     CDS             complement(13755..14123)
                     /codon_start=1
                     /product="Phage baseplate assembly protein"
                     /label=Phage baseplate assembly protein
                     /db_xref="SEED:fig|6666666.356857.peg.17"
                     /translation="MTATYTGMNPHGTGTLTDADQLWQSVRDILTTPLASRVMRRDYGS
                     LIPDLLDAPQNAVTRLQLMSAAVIALTRWEPRISLNAVDIRYSASGAVEAELSGLITET
                     MQAARSTLTLRSDSDGDG"
     CDS             complement(14120..14701)
                     /codon_start=1
                     /product="Phage baseplate assembly protein V"
                     /label=Phage baseplate assembly protein V
                     /db_xref="SEED:fig|6666666.356857.peg.18"
                     /translation="MSAELMRLLENLLRVGVVTAVDPESWRVRVKSGELLTDWLRWNTT
                     RAGAFNVWFPPAVGEQVLLGCLGGNPETAVIIGSLFSEAHPAPGNSLKEIVITAPDGAR
                     FRYDAVAGALEATGMKTANVVASVSVTLNTPVVECTQHLKARTVEITHGGTLAGDVAHS
                     GGAMTSNGVQVDNHRHGGIQPGGSWTSDTQ"
     CDS             complement(14698..15336)
                     /codon_start=1
                     /product="Phage tail completion protein"
                     /label=Phage tail completion protein
                     /db_xref="SEED:fig|6666666.356857.peg.19"
                     /translation="MTDKLFHALDKVFDDILSGLSPAGRLKTARQVGQALRRSQQQRIR
                     AQRNPDGSAYATRRRKVLRSQKGMVFVWEGQVRHLKNWHGGRGKFGRTITGFDEDRNAI
                     RTFYRSDIERYIEINTQAVRRTTSKTTPMFQRLRGYRFLKMQADTDGASVGFDGIAARI
                     ARVHQYGERDKVRPGAFARYPVRELLGISPADERLIQDTVINSLGSAST"
     CDS             complement(15333..15791)
                     /codon_start=1
                     /product="Phage tail protein # FIG072132 and FIG003673"
                     /label=Phage tail protein # FIG072132 and FIG003673
                     /db_xref="SEED:fig|6666666.356857.peg.20"
                     /translation="MLKTDSLRDALTASSTWCRANPEAFTVFVEEGGIETTGETPSFLY
                     RYSLVLFVMNFTGDIDDFTLPLMAWLWQNQPDLLLNPQKNREVKFTTLINNDDSADILF
                     EIPVRERVRVTRDDNGILRAEHLPEPRPRLTSGVWDAVLDDATGEAAA"
     CDS             complement(15802..15939)
                     /codon_start=1
                     /product="hypothetical protein"
                     /label=hypothetical protein
                     /db_xref="SEED:fig|6666666.356857.peg.21"
                     /translation="MTWGEVALWSDQLLDALDTCNADKAAINDVYLRRLQRLKDAATTP
                     "
     CDS             complement(15908..16345)
                     /codon_start=1
                     /product="hypothetical protein"
                     /label=hypothetical protein
                     /db_xref="SEED:fig|6666666.356857.peg.22"
                     /translation="MKLAATLAVLLVLAVCGVLWQTYQRGIDRAHTEALTDSAQQQREL
                     LTEFRALADDARNVLAQVREREQQRYAEGEERREKMREGMQPDTCANTVVPVAVSDSLQ
                     KRAAVVQRADTARPGTAQPDGTHTDARTENAGDLGRGRTLE"
     CDS             complement(16342..16887)
                     /codon_start=1
                     /product="Phage lysin (EC 3.2.1.17) # Phage lysozyme or 
                     muramidase (EC 3.2.1.17)"
                     /EC_number="3.2.1.17"
                     /label=Phage lysin
                     /db_xref="SEED:fig|6666666.356857.peg.23"
                     /translation="MKTAIKRCSIALIVALGVTLSPGTLRTSPEAQQKTASWEDCRASP
                     YYCPAGVLTVGIGSTGNVQNRPYSNDEIARRWVNDMQRAENCVNDNFNGAAMPQSAFEA
                     MTDTAFNLGCSGLMWFTNRQGSKQRTTIWKHAQAQEWPAMCERLTDFVNSGGQRSTGLV
                     NRRSDFKAWCLRDLAGVP"
     CDS             complement(16871..17173)
                     /codon_start=1
                     /product="hypothetical protein"
                     /label=hypothetical protein
                     /db_xref="SEED:fig|6666666.356857.peg.24"
                     /translation="MGLNDLQRLNDGVTYGLSVMVTGIGVMTVSEKVALAGLVIGVVTA
                     WRAWLFRRRIERAQRRRNELIEQILQQSERRTLNTSERHAVAILHQGDVDDENRD"
     CDS             complement(17164..17364)
                     /codon_start=1
                     /product="Phage tail completion protein"
                     /label=Phage tail completion protein
                     /db_xref="SEED:fig|6666666.356857.peg.25"
                     /translation="MVVWALQGDTVDLLCYRHYGTSAGITEQVIAANPGLSRQMFLTAG
                     QAITLPDIPRQTEQETVQLWD"
     CDS             complement(17364..17855)
                     /codon_start=1
                     /product="Phage head completion-stabilization protein"
                     /label=Phage head completion-stabilization protein
                     /db_xref="SEED:fig|6666666.356857.peg.26"
                     /translation="MSLVAQKRVSDSGDVPEIDDGAAAVSAGEFWPVIVLRDLRLAARI
                     TGGITTTRLMHVTTEAVVHVTDQLTDWQQTQQAAGYAALADVPARQVNSESIKVYRFRR
                     AVYAIARALLLEGYRDVDTTAKGDKATDTFDNQCDDLWRDARWSIADIRGAQRLFAELC
                     "
     CDS             complement(17954..18835)
                     /codon_start=1
                     /product="Phage terminase, endonuclease subunit"
                     /label=Phage terminase, endonuclease subunit
                     /db_xref="SEED:fig|6666666.356857.peg.27"
                     /translation="MLTPAQRHFQRVMAERRGQADTETAVSRTAHEQILHRLRLHQAAL
                     KQVQSDATKAEMKKAMLPEYDGWIDGTLEGDSGRQDEVIVTLMVWAIDCQDRALTLRLG
                     RYVVKHGLSLPADKFCRDAVTVLAEEVSNPVLTLATTDADADLSGYTAVLDEVAAIVDG
                     KDMPDEVRAKLCKARAFSRRAAVDAQTKAEALTLFREAMARNPNAGVKREIATLTRELK
                     KLMPGSSDAPEDGAPGDDETTTETPAGETPPAASATAAQPAVKKAAVRNTTARKTTRAT
                     GKSKAARQSAKR"
     CDS             complement(18879..19934)
                     /codon_start=1
                     /product="Phage major capsid protein #Fam0066"
                     /label=Phage major capsid protein #Fam0066
                     /db_xref="SEED:fig|6666666.356857.peg.28"
                     /translation="MENSTRNLFDQYISRQAQLNGVQPNAVAMAYSVTPAAQQRMEQAA
                     QESDEFLKQINVFGVKAQEGQKILIGSKGPIASTNNSSDGTSRRNPADNHSKEPNDYHC
                     RKVNYDSAVSYPQLDAWASQPNFQALISQANARQIGLDRIMIGFNGTTYAEKSNRSANP
                     LLQDCGVGWLQKIRNDAGHRIIKNVTLTARDEDNKIVAKGTYGNLDTAVFDAKNSLLDP
                     WHRRAPDLVVIMASDLLTSSNFPRLNALSQSNPNTELLAGQLIVSQERVGGLPTFLAPY
                     FPSNAVLITSFKNLSVYYQLGALRRSIVEEPEYNRVATYQSSNDDFVVEDYGKVALIDG
                     IQFAQAAGDGQ"
     CDS             complement(19966..20805)
                     /codon_start=1
                     /product="Phage capsid scaffolding protein # Fam Scf032"
                     /label=Phage capsid scaffolding protein # Fam Scf032
                     /db_xref="SEED:fig|6666666.356857.peg.29"
                     /translation="MSGTAKPTRKKFRVAVSGSTVDGREIGRDHLYAMAESYNPQVYGA
                     RVNVEHILSPYPGSDFSAMGDVIALSAEDITDGPLKGRAALYAEIEPTERMKKLTSEGK
                     KIYSSIEIDPQFAATGKPYLRGLAMTDTPASLGTDRLKFAAQQRAQVQAFNNLPGEPVM
                     FTEAMEAELVELSEQRSDEGKQWFSRVMGIIGKGRKSDSEQFNQVREAVENVAQSHADL
                     LDSFNTLKTQQQQDSRTIQTLTSELAALTQKLATQDNSYSQRPAASGGNSSVQLADF"
     CDS             20964..22691
                     /codon_start=1
                     /product="Terminase, ATPase subunit"
                     /label=Terminase, ATPase subunit
                     /db_xref="SEED:fig|6666666.356857.peg.30"
                     /translation="MIQDAFVRQRAKQLYWQGYPPAEISRLMGINQNTVYAWKKRDEWD
                     ETPPIQRVTHSIDARLCQLAQKPTKTGGDLKEMDALTRQLKTLNDGQPGNAAGSKKPRQ
                     RKVKNHFSDEQIAALRTNILDSLAWHQNGWYEQRHHRNRMILKSRQIGATWYFAREALL
                     RALRDDVAYPYQRHQIFLSASRRQAHQFRGFIQKVAEEVDVELKGGDKIVLSNGAELHF
                     LGTSAATAQSYTGNLYFDEFFWVSNFANLRKVAGAMATLKGLTRTYFSTPSSETHEAYP
                     FWTGARWNEKRSKAQKVAFDVSWKALNSGLLCPDKTWRQIVTLQDVIDHGWEYTDLEEI
                     RDENSPDEYNNLYGCEFVRDGESAFNLNLLFSCGADGYDEWPDWKPFASRPMADRGVWV
                     GYDANGSSGNGDSGAISVVVPPLVAGGKFRTIETQQIRGLEFEEQAKVIEALTFKYNVQ
                     HIAIDGTGIGEAVYQIVKKFFPAAVCFLMSVSSKRALVLKMLQVIRAGRWEYDRSEQAL
                     INAFNAVRRVKTPGGIMTYDTDRARGSNHGDLAWATMLAVINEPLGQEQGGGGFAMEF"
     CDS             22691..23743
                     /codon_start=1
                     /product="Presumed portal vertex protein"
                     /label=Presumed portal vertex protein
                     /db_xref="SEED:fig|6666666.356857.peg.31"
                     /translation="MKRKDKTGTHRAVTASQPDMAAALKSDPGLSAFTFDGPYPVRDGH
                     DLLDNMYCADNGRYYDTPVDWYGLARAFGSASWHQSALYFKRNALTGCFIPHPLLSRQA
                     FSAFVLDWFVFGNGYLERRVNRLGGVLALRHVPAKYTRRGSDLNTYWFIRQWKDEHTFD
                     TDSVCHVINPDIHQEIYGMPEYMGALLSASLSHSADMFRKLYYDNGSHAGCIIYIGASQ
                     VDTESMDNVKKTLKEARGKGAFKNLLLHAPGGGEKGVQIIPFSQISAKDEFLNIKSVTR
                     DDILAAHRVPPQLMGAMPEGNGSFGDVEKAARVFAINELMPVMEALKHVNDWLGMEVIR
                     FNPYALLKAE"
     CDS             complement(23794..23967)
                     /codon_start=1
                     /product="hypothetical protein"
                     /label=hypothetical protein
                     /db_xref="SEED:fig|6666666.356857.peg.32"
                     /translation="MCQIRPISRPAACVFPFGRRGAASGESARWRGADAVLCGWEMVAL
                     AVDLKRDCAWVT"
     CDS             23948..24166
                     /codon_start=1
                     /product="hypothetical protein"
                     /label=hypothetical protein
                     /db_xref="SEED:fig|6666666.356857.peg.33"
                     /translation="MGRIWHIKGDPCLPPKRGPFPRHLRAALASFFVQVQKPARRACVP
                     GGKGKNSIKKIVQNCAGLFKNQLQLLL"
     CDS             complement(24378..24590)
                     /codon_start=1
                     /product="hypothetical protein"
                     /label=hypothetical protein
                     /db_xref="SEED:fig|6666666.356857.peg.34"
                     /translation="MAISPIQKQLAELEKKVEILDSIIDIAKTSGGRITDDGKNLIYIL
                     RNAGMSKTGIAKLLDVSPAALTKYQ"
     CDS             complement(24774..25142)
                     /codon_start=1
                     /product="FIG043818: putative DNA binding protein"
                     /label=FIG043818: putative DNA binding protein
                     /db_xref="SEED:fig|6666666.356857.peg.35"
                     /translation="MSKLQYINDLNGNPQFVVLPIDVYERLLSNDDSGYESIPYAADEH
                     DDETVPNEVVNIMFSDDISLLAAWRVYRGLSQYDVAERLGTTQSAVSQWEAKDSRPQKK
                     TREKLAELYGCRPEQMIL"
     CDS             complement(25214..25474)
                     /codon_start=1
                     /product="RelE/StbE replicon stabilization toxin"
                     /label=RelE/StbE replicon stabilization toxin
                     /db_xref="SEED:fig|6666666.356857.peg.36"
                     /translation="MVRVIWSKKALKQRLTIDKRYQAAISEKVTELENFPAVRLDIVPL
                     KGQEGAFRLRVGDYRIIFQITKGEPVICEIKEVKRRTSTTY"
     CDS             complement(25558..28104)
                     /codon_start=1
                     /product="Phage replication protein # Replication gene A 
                     protein"
                     /label=Phage replication protein # Replication gene A
                     /db_xref="SEED:fig|6666666.356857.peg.37"
                     /translation="MPEQWAYPWNAPRPAISAQSGVADLRPSLLVTDAEPHPAVTRHLS
                     RMVKRALAAPGDNRNLNQAVAQLEHREPNGTQLRIRRGLAEIVRWDHQETVSGWMKTPE
                     GVEARLHEQPFFIRDVYRQKIEWLRANREPRHISAFFMGTVKKALLRLDAVRAQQGVRD
                     GFASELAAYWGPRWAHLAGFTKHEVINAAHTLAAAVAEMFETECGNISPEDMTDDEIQW
                     LYRHLGRELLALRVTPPCWGLIIGDEQVRHRIYSAILRITSPEWWGRKLWRLRCEWREN
                     QFRAIGVIHKKRMPYVSLDALNQWQEQRRKNRAFFQTHELVDEDGNIASLENMVYGSIS
                     NPAIRRHELMTRMAGVEMVAIARGDEGVFLTITCPSRYHANIQNGHQNPKWDHASPRQG
                     QRYLCRTWARAMSALNRRGLRPYGFRVAEPHHDATPHWHVLLFMPPADRKAITDILREY
                     FIAEDRAELGRNTGARFKAKKLDPRKGSATAYVAKYISKNIDGYALDGELDNETGKPLR
                     ETAKFAMAWASQHNIRQFQPFGLPPVTVWRELRRLANQLTAAQKENGTFKRGAAQLADP
                     EMDAVLASADAGCFATYIEKQGGVLIPRERYTVRIAYEDADEQNTYGETPEKIFGVFSP
                     RLGAISRICTRLVKWKIRKKQAIDDGASISTGSGLAVTSPTGDAWSSVNNSTGDEKTSI
                     PTGIDGDDYGSCELPDGEPGDTSAQTFTDFERMTDPERRALLSRLRTQPPDRRNNQHSP
                     TTQRNKFVEKQAVGKLPDEWHASIADFARSIGWDISIGEASRLAAGHPIEFCGYRYYAR
                     RNGELYREAEKQQVDKAGLMQRVAALCELSQREKIR"
     CDS             complement(28104..28391)
                     /codon_start=1
                     /product="Phage protein"
                     /label=Phage protein
                     /db_xref="SEED:fig|6666666.356857.peg.38"
                     /translation="MSILQLAVMGEYFAAMKAGMKPFEYRLDNAYWRRRLIGRDYEQLV
                     ITWGYPARSDMSRRLILPWLGYEMQTITHPHFGDKPVNVFAIRIGDGVCE"
     CDS             complement(28388..29305)
                     /codon_start=1
                     /product="Modification methylase ScrFIA (EC 2.1.1.37)"
                     /EC_number="2.1.1.37"
                     /label=Modification methylase ScrFIA
                     /db_xref="SEED:fig|6666666.356857.peg.39"
                     /translation="MMKAIDLFAGFGGSSTGARMAGAQVVWAANHWPAAVDYHRLNHPD
                     AIHVCQDLHQADWSNVPPHDLMMASPCCQGHSRARGKAAGNPQHDASRSTAWAVVSAVE
                     YHRPSAVIVENVPEFLNWALYPAWAAAMAALGYALSPHIVDCADLGVPQNRIRLFLVCT
                     LSRSPLLLALPRISHVSAGTLIDFDDGKWSPINRPGRAISTLERIESGRRQFGERFIFS
                     YYGNTKTGRSLNRPIGTITTRDRWAIVDGDRMRMITKREVMAAMSFPSLYITPESHRLT
                     VNMAGNAVPPVAMCRVVEAIGGCL"
     CDS             complement(29302..30135)
                     /codon_start=1
                     /product="Methyl-directed repair DNA adenine methylase (EC 
                     2.1.1.72)"
                     /EC_number="2.1.1.72"
                     /label=Methyl-directed repair DNA adenine methylase
                     /db_xref="SEED:fig|6666666.356857.peg.40"
                     /db_xref="GO:0009007"
                     /translation="MSIIATPLKWVGSKARIMDILREHLPAGDRLVEPFAGSCSVMMNT
                     DYPEYLLADINPDLINLYQVIKEDVKEFIDIAEGLFRTANTAESYYRFRQVFNRSKENR
                     TTSAALFLYLNRHGYRGVCRYNRAGGFNVPYGHYASPYFPLAEIQAFAEKARRAKFICA
                     AFGETLQLIRPGDVVYCDPPYIPQTPTASFTSYHTDGFTHNDQYDLCSALSRLAERGIP
                     VIASNSDTHHAHSLYHRFDICRFTAPRSVGVAAGESKQAGEIIAKRLPVSERGTA"
     CDS             complement(30132..30356)
                     /codon_start=1
                     /product="Phage protein"
                     /label=Phage protein
                     /db_xref="SEED:fig|6666666.356857.peg.41"
                     /translation="MDSIDMAQEREAFIRETQIQKARQQSGCAISAFVCESCDAPIPEA
                     RREAVPGVRLCVYCQGDAELKNKHYRGAL"
     CDS             complement(30356..30586)
                     /codon_start=1
                     /product="hypothetical protein"
                     /label=hypothetical protein
                     /db_xref="SEED:fig|6666666.356857.peg.42"
                     /translation="MKNAEVKTMTVANDGALVELLKKARLEERKDQHFSFSLRLAALAV
                     RAQQRDLSAAEMVELIRQESERFERSAQGLS"
     CDS             complement(30651..30992)
                     /codon_start=1
                     /product="Phage protein"
                     /label=Phage protein
                     /db_xref="SEED:fig|6666666.356857.peg.43"
                     /translation="MANTEPARAIPLSIAERTDGLNHIAMLRGKHFKTNSEKEMCRFID
                     DMRDRIDDDYHKNMRVLSAIFELADIDKERHHLKFNELTTDEKERLIKAMNKLRAVVSL
                     FPKNLILPL"
     CDS             complement(30997..31206)
                     /codon_start=1
                     /product="hypothetical protein"
                     /label=hypothetical protein
                     /db_xref="SEED:fig|6666666.356857.peg.44"
                     /translation="MISIARLLTSQSPSPVIPNQGKGWLELPNGQRVKPSVNQVYFAPW
                     SQKPYIPASKQKRRWFSRLMGIAA"
     CDS             complement(31208..31423)
                     /codon_start=1
                     /product="hypothetical protein"
                     /label=hypothetical protein
                     /db_xref="SEED:fig|6666666.356857.peg.45"
                     /translation="MENKKSGHQYAITQLSKHTNVYRGFSIIKCPRTISNPITRYRVSQ
                     AGQSYGLFDALALATGYIDNLYTARR"
     CDS             complement(31433..31645)
                     /codon_start=1
                     /product="hypothetical protein"
                     /label=hypothetical protein
                     /db_xref="SEED:fig|6666666.356857.peg.46"
                     /translation="MSKGLTININVPTPYVSLRKYSELTGIPFETCRGMVKSGKIIIRP
                     KEKANEKVEVNLVAMLRDAITSSEI"
     CDS             complement(31651..31776)
                     /codon_start=1
                     /product="hypothetical protein"
                     /label=hypothetical protein
                     /db_xref="SEED:fig|6666666.356857.peg.47"
                     /translation="MRLSEDERARLAALAEKESRSLSSMARLVFLRGLESFNAEG"
     CDS             32098..32322
                     /codon_start=1
                     /product="hypothetical protein"
                     /label=hypothetical protein
                     /db_xref="SEED:fig|6666666.356857.peg.48"
                     /translation="MDVSYILTGKRTPDLGDISNDELELVKIYRAAPLAVKAAALAALT
                     AGSSASAGTINITGSGQRVAGRDYHENKK"
     CDS             32342..32953
                     /codon_start=1
                     /product="hypothetical protein"
                     /label=hypothetical protein
                     /db_xref="SEED:fig|6666666.356857.peg.49"
                     /translation="MSVESHGNENRLAGRDFYESSITVDKINIAIPAANEEKRPLVPAQ
                     RKQLNQLVKEIADGGYEEGFSVWQRVHAEIGVKSIEDMTVNQYQTAVSYLQALRDRYRE
                     KDASNALVHLLLKNTQQVDQRQQLIHYCHIHFGTGRLTELTRSQLQQALSWLDDRQCST
                     VPEQTAPNARQSWQEVLKAEPLVFSAVFVAGIILGAIFFR"
     CDS             33033..34211
                     /codon_start=1
                     /product="hypothetical protein"
                     /label=hypothetical protein
                     /db_xref="SEED:fig|6666666.356857.peg.50"
                     /translation="MTFEEWISKNEKEIFFTYINANNEASNNHVADAVYKDNYLQGYCI
                     NKKGFRTFKLERILDVYSSNEEMVSAAGPLTIVGLKIENRRAKDTLRGLEICFTGFDKD
                     IKDELESLAEKKGLLVRKGITAKLYFLCCGPNAGWKKIKQANEKNCFILSKDQFFSFVD
                     TGEIPIESTEVYESDEKDINEKIENLHNEVTSTFRTIREPRRSTALIARFVDGYAIGWR
                     FAIRESHRNALDIKLTKFVFNKHQYEDWTQGSSFSFGRGDVFYSDKLGYSEWSEFLKIP
                     DAVVLQVKYECFSGYDPVATIDGFFSGDFIPDNQLTPKKLTNLPIMIRSESYDPGKITL
                     DIFKPSLDRSNLDLFDTIKITQDELISLLQSGYYWKKDEGQKPVRINLFGDN"
     CDS             34304..35188
                     /codon_start=1
                     /product="hypothetical protein"
                     /label=hypothetical protein
                     /db_xref="SEED:fig|6666666.356857.peg.51"
                     /translation="MADEKLDFFNYKRNKDKLLINLINIIEGINCDGHIDEKEVLFLDT
                     WIKDADLISKNYCVRMISNRLSDILSDGVIEPYELNYLKADLIKVQKELSDLPELDLYS
                     DEADKHLLEGLCKGMMANHELNDSEIRYLNWWLSSNASLKVNYPGKELYALVNRILADG
                     IITSEERDELKKALIAFTGSDVDSGVVDGLATRLPVDDIESLVLSNATVCLTGEFLYGK
                     RSVCKKLIEDAGGKVIDNITAKLDFLIIGTLSCKHWRYQAHGRKIEKAIDYRDNRGIPL
                     KIISEEQWQSFTG"
     CDS             35195..36190
                     /codon_start=1
                     /product="Phage integrase"
                     /label=Phage integrase
                     /db_xref="SEED:fig|6666666.356857.peg.52"
                     /translation="MAVSKLPSGKWLCQCFPYGRDGQRVRKQFATRGEALAYERRLMAE
                     KKGISTETNSTTLQDLIQRWYDMHGQTLESGEDRYAKLMAICVRLGNPFAVDVDKNMFA
                     VYRERRLKGEWNPKGKTAIKEATVNREYSYLRAVFSELKRMGEWEKENPLDGIRQFKEG
                     DQELAFLYPDEIKRLLAACDESENKDLGIIVRLCLATGARWGEAQTLKQSQILPGRITF
                     VKTKGKKNRTIPISERMHALLPKRRGQLFKPAYEAFKHALKKAHIELPEGQLTHVLRHS
                     FASHFMMRGGNILVLQQILGHSSITMTMRYAHFAPDHLDAAVTFNPFDNL"
     CDS             36211..37260
                     /codon_start=1
                     /product="hypothetical protein"
                     /label=hypothetical protein
                     /db_xref="SEED:fig|6666666.356857.peg.53"
                     /translation="MRYALYYPSIEFRDTEFLKKSLLIWDKVFRIVPHNYKPQDNPGIL
                     LASQEEFVLDINVDEKDKRSTADGFLRFYNRIESSETGLVWPAGLDSESFVRINPEKIE
                     ARLLPLFEELNRQYTCNGFMTIPAPLAGGYMFYLANSVAKSRDLHLLTDSPDTWAVGTY
                     FSQNGNFDEFIYNESSDVYMCQCSVNGVMPSNLSDIPMDKLFRFIEEHHDEKENFRIEL
                     ERLRGEIARCNNKKHAEYIANDFVSNLNRAKREYKDSLRKLNRRNLYNIFTFGVPATAS
                     VLSLGIGGSIWDPLSIASGVTIGAIASFFSRQMIPRDKGTPSYLVSLESMSSEPTGQLN
                     RIFNEFIND"
     CDS             complement(37497..37655)
                     /codon_start=1
                     /product="hypothetical protein"
                     /label=hypothetical protein
                     /db_xref="SEED:fig|6666666.356857.peg.54"
                     /translation="MNKTFFKFGLITAYKTVIINAREKRCRHSAAILSPLAKLQAQKNR
                     LVAVIFF"
     CDS             37858..38424
                     /codon_start=1
                     /product="hypothetical protein"
                     /label=hypothetical protein
                     /db_xref="SEED:fig|6666666.356857.peg.55"
                     /translation="MFSWFKPKQNNCEQVVDRLRQIETVFAPEGWERHAEIAVGGLSEI
                     GFSKVTHHLLVVSSNGRGVVDCQTGERVARDYEVYGSWYDSLNMTCLGIGPLDGELISI
                     AGLCGGGLPVYNRYGERLEVAAPEWPDEDVYFCPPNKSAFINGHQAGCCRIFRDQILSM
                     GFSWNGEFMAVATSSDVTVWQRQSP"
     CDS             complement(38737..39177)
                     /codon_start=1
                     /product="Phage endolysin"
                     /label=Phage endolysin
                     /db_xref="SEED:fig|6666666.356857.peg.56"
                     /translation="MKSSMIIAAIIMLLSAGIGVQSWRLHTNRQLTEQQAQTLSLQQTA
                     LNEKSSQLTALSEQAERSNIEQARLRDMAADTQVALSERQKMIVRLQHENEALKRWADS
                     ELPADIIRLRQRPALSGGRAYREWLSQTDSLPVPTSQPTNQR"
     CDS             complement(39174..39665)
                     /codon_start=1
                     /product="Phage lysin, 1,4-beta-N-acetylmuramidase (EC 
                     3.2.1.17) or lysozyme #Protein S in phage lambda"
                     /EC_number="3.2.1.17"
                     /label=Phage lysin, 1,4-beta-N-acetylmuramidase
                     /db_xref="SEED:fig|6666666.356857.peg.57"
                     /translation="MPTNSPNLTAFLDMLAFSEGTATHPLTRNRGYDVIVTGIDGKPEI
                     FTDYHDHPFANGRPGKIFNKQGQRSTAAGRYQQLYRYWPTYKALLKLPDFGPDSQDTLA
                     IQLIREQRALEDISQGQIASAITRCSNIWASLPGAGYGQREHSIDRLLTAYQQAGGELA
                     "
ORIGIN
        1 gtgactgact gttttgatgc ccaggctttt ctgaagaccg taaccagtca gcctggggtt
       61 taccgcatgt atgatgccag tgatacggtt atctatgtcg gtaaagctaa ggatctgaaa
      121 aaacgtcttt ccagttactt tcgtgctcat gttgccagcc gcaaaacaga ggctttggtc
      181 aaaagtatcc gtcagattga tgtgacgatc acgcatactg aaaccgaagc cctgttgctt
      241 gaacacaact acatcaagcg ttatcagcca cgttataacg tgttgctgcg tgacgataag
      301 tcctacccca tgatttttct cagcggggat acacatcccc ggctgtctgt ccatcgaggc
      361 gctaaacatg ccaaaggcga gtactttggt ccgtttccta atgggaatgc agttcgtgaa
      421 acactgatgc tactgcaaaa actgttcccc attcgccaat gtgaaaacag cgtgtaccgc
      481 aatcgctcgc gtccgtgcct gcaatatcag attggccgct gtctggggcc gtgcgttaac
      541 ggcctggtta gcgaagagga ataccaacag caggtcgatt atgttcgtct gtttctgtca
      601 ggtaaggatc agcaggtatt aacccgcctg attgaacgaa tggaggcggc cagccacgca
      661 ctgaagtttg aggaagccgc ccgtatccgt gatcagattc aggctgtacg ccgtgttacc
      721 gaaaaacaat ttgtctctgg cgatggtgat gaccttgatg tcatcggtgt ggcgttcgat
      781 gctggtatgg catgtgtgca tgtgctcttt attcgtcagg ggaaaatact gggtagtcgg
      841 agctactttc ccaaggttcc tggaggcacc gaactggcag aagtggtaca gacctttgtt
      901 ggccagttct atttgcaagg gagtgtttct cgtactttac catccgacat cctgctggat
      961 ttttccctac ctgagtatca gttgttagct gaatctctga ctgaacaagc gggtcgaaaa
     1021 attcagattc aaacccgacc tcgcggcgac cgggcgcgtt atctcaaact ggctcgtact
     1081 aatgcgcata ccgcactgac aacaaagttg tcacagcaat cgactattca gcagcgtctg
     1141 acggcattgg cttctgtgct tggaatcgaa aaaatcaacc gcatggagtg cttcgatatc
     1201 agccacacta tgggtgagca gacggtggcc tcctgtgttg tatttaatgc ggatggtccg
     1261 ctacgttcgg agtatcgacg ctacaatatt acgggtatta caccaggtga tgactatgcg
     1321 gcgatgaatc aggtactcag gcggcgatac gataaatcaa ttgatgaaag caagattcct
     1381 gatgtgatcg tcattgatgg tggtaaaggg cagttggcgc aagccagaga tgtttttgcg
     1441 tcattgcacg taacctggga tacgacccgc cctgtattgc tgggcgttgc aaaaggcagc
     1501 gatcgtaaag ccggtctgga aaccctgttc ttcgaagcga cgggtgaagg tgtagctcta
     1561 ccggctgatt caccagcact gcatgtgatt cagcatattc gtgatgattc acacaatcat
     1621 gctatcagtg gtcaccgtaa acagcgtgcc aaagtcaaaa gtaccagctc gctggaaacg
     1681 attgagggcg ttgggccaaa gcgtcgccaa atgctgttga aatacatggg tggattgcag
     1741 ccgctgatga atgccagcgt ggaagacatt gccaatgtgc cgggaatttc gcatgcgttg
     1801 gcagaaaaaa tctttcatgc attgaaacac tagaggcaat gtagcaacat aaccctatta
     1861 tctttcgggc cagacagtta cccagacgct atgcgattta atataccaac gtggcttacc
     1921 ctgtttcgtg ttgtgctaat cccattcttt gtgctggcgt tttatctgcc atttagctgg
     1981 gcgccgatgg tatgcgctgg catctttgtt tttgccgcgg taaccgactg gtttgatggt
     2041 ttccttgccc gtctgtggaa gcagaccacg cgtttcgggg cctttctgga tccggtggct
     2101 gacaaagtca tggtggcggt ggcgctggtg ctggtctgcg agcattatca ctcgtggtgg
     2161 attacgttgc ctgccgcgac aatgattgcg cgagagatca tcatttccgc attgcgtgag
     2221 tggatggctg aactgggtaa acgcagtagt gtggcggttt cctggattgg caaagttaaa
     2281 actactgcgc agatggtgtc gttggtcggt ttgctgtggc gacctgaacc tatggttgag
     2341 gcggcggggg ttgcggctct gtatgtggcg gctgtattaa cgttctggtc aatgttccag
     2401 tatttgagcg cagcctggcg tgatttgctt gaacattgat cgcctcgcct taaaaaacag
     2461 caaacgattc tggtgaggtg ataattttat tgactcactg cgtcaggtaa gtagaatgca
     2521 ccgcatcgac agcaacacgg tttattgaaa ttacttaata aacaatgcgt tctgtagaat
     2581 gcgggaatag ctcagttggt agagcacgac cttgccaagg tcggggtcgc gagttcgagt
     2641 ctcgtttccc gctccaagtt gatttagttg tagcgttaaa aatggggcgc gttggcagag
     2701 tggccatgca gcggattgca aatccgtcca cctcggttcg actccgggac gcgcctccaa
     2761 attctgagcc cagatggtgg aatcggtaga cacaagggat ttaaaatccc tcggcgttcg
     2821 cgctgtgcgg gttcaagtcc cgctctgggc accatgcgtt aacgccttgt aatataagaa
     2881 aataattaaa agaatatgac cgccacgagg cggttttttt gtgcctgtaa tttggcaagt
     2941 ggcgacaaaa tggcggcaga gtggcagcac ccgtttttca ggtacaaaaa agacggcctt
     3001 caatcagccg ccattgttaa ccgtggttga ataatcgata cccaaacaaa agccccgcac
     3061 tcatcctgcg gggcttctgt tttataacgc cagattcaac tgatcccggc cgtaatgcga
     3121 ggccggaaag gcgtcctgtg ggataaagtc aggtggtaac gggtcttccc gtgtacgctt
     3181 tgatacacgc cgttctaccg tgttgagggt ggtaaatgtc tcgctacatt ccagattttg
     3241 gcactggtga tactgccgga tggtgatatc gctcaggcgg cgactggtac gggtgcgggc
     3301 cattgccccg cagaaaggac atctgaacat aatggctccc ctgtgggagt tgaactcgcg
     3361 gccattttat tcactttctg ctatccagtc agggattttt gcttccagct ccagacgggt
     3421 ggtaaagccg ttgccatcaa taacgtgttc cacgcgggcg ataatccagt cctgattgtc
     3481 gatatccggt ttaaagccgc ttaccgtcag gtgcatttcg ggatacagct cagcacggcc
     3541 acgcgccagg gtaatcgaga attcagcggc tccacgttgc aactgtcgcc atttagctgc
     3601 cgccgcccgt ttggcgacct cttcattctg gtaggtttta cgcagcacga acacgttacc
     3661 ttccgcgccg gtgatgtaat cgccttcacg gctgctgctc ttttcctttt tcggtttggg
     3721 ctttgtccgg cggcgcttta cactaacctt cttcttttta ccaaatttca aatccagcca
     3781 gtaggcgcgc acgccggtgt aggcatcccg atcggcaatg cggaaacggt ggccgtcacc
     3841 gctgctgcgg gtaatactgg ccgatggcag cgccttgccg gatgccgtta caccaccgcc
     3901 gggcaggata aacagcaagg tgccgttttt gatggtggca atcgccccca gttgctcggc
     3961 cacccgggtc aggaatgaca tatcactctc ttccgtctgg tcggcatggt cgatttcgat
     4021 attcatcagc atgtcgctga tttgcgcctt catgccatag cggtgcgcaa tcgccgacac
     4081 cacgcgctct accgtcacgt catgccagga aacctcccgt ttcacgttga actcttcgcg
     4141 aaaatcagca cttctggccg taacacccag cacatcgggc gggccttcgt gtgaaatctc
     4201 atccacggta tacagccctt tgtaagtcag cgcctcaccc tgccagccga tggatagcgc
     4261 aatccgggca ccgcgcggcg gcagttctac acgtccgtca ctgtcgtcta tcgacagcgt
     4321 gagctgatca gcctcaaagc cccggttgtc ggtcagcgac aacgagatca gccggtcgct
     4381 cagttccttc agtgatttcc cgcccagcgt aatgctgaag ttcgggcttt ttaccgcctc
     4441 ggttagcgcg tcatcgtagc gtttcgccgt agtgataagt gagtcagcca gatcggtgat
     4501 agccatcgtt tccccctgtt ttcgcgcatg atttcacgcg cacgcgtggg gaaaaatggc
     4561 tttttgttgt cgccggacgg ccagacccgt cagcgcgtga gtgtgcgacg gatatcgggg
     4621 attatcgcca tgaactcaat aacgtaatgg tggcgaacat gtccgagaca cgtttccacg
     4681 gtgtgcgcgt tcgtgaaaat accgacctgg taaccgcaat caatgacatt gattccagtg
     4741 tgattggcgt ggtggccgtg gcggaagatg cggacgcaga cacctttccc ctgaatacac
     4801 cggtgctcat cacacgggtg aatagcgtgc tgggcaaggc aggtaaaacc ggctcgctct
     4861 acaagacgct gaaagccatt tctgaccaga ccagcccgaa agtgatcgtg gtacgcgtgg
     4921 cagcagcaac cgaaggtggc gacaaaaccc aatcccaact gattatcggc gggacagcgg
     4981 cagatggcag ttataccggc atgtatgcat tgctgacggc agaagcaaaa gttaattacc
     5041 ggccccggat tttggcggta ccggactatg acaccgccga agtgacgtca gcgctgtgtg
     5101 tgattgcgca aaacctgcgg gcgtttgtct atgcctgttg tcacggctgc accacgatgg
     5161 cggaggctat cacctaccgt gcgcagtttg cgtatcgtga gctgatgctg atctggccgg
     5221 atttcatcgc ttataacccg cttagcggca gcaatgaaac ctttccggcg tcggcctatg
     5281 cctgcggcct gcgcgcagcg attgataacg atcagggctg gcataagtcg ctgtcgaacg
     5341 tggcagtgaa taacgtgctg ggtatctcgc gagatgtgtt ctggtcgctt caggctgaag
     5401 acagcgacgc caatgaactc aacaaccagg agatcaccac gctgattaag cgcaacgggt
     5461 tccgcttctg gggcaaccgc accaccgata cccatgatta cctgtttgag gtgtacacac
     5521 gcaccgcgca aatcctcgct gacagtatcg cggaagcgca gtttgaagcc gttgacgagc
     5581 cactgactcc ggccaacgtg aaagacgtgg tgaacggcat aaacggcaag ctgagcgcgc
     5641 tggtcacagc gggcaggctg atcggcgggg aatgctggtt cgatattcag gacaacccca
     5701 caaccggcct gcgacaggga caggtgcgcg tgcgttacaa gtacacgccg gtgccgccac
     5761 tggaagacct gacgttatac cagaccttca ccgatgacta ttttgactcc gcgttctcgt
     5821 cactgggagg tgtgtaaatg gccgtaccgc ataaattgcg cctgttcacc tgttttgtga
     5881 acggcaacaa ccagatcggc aaggtcacat ccgtcacgct gccaaagctg acccgcaaga
     5941 ctgaagactt tcagggtgcg ggcatgattg gttcggtggc ggtcgatctc ggtatggatt
     6001 ccggcgcact ggaagcgcag atggtcgtcg gcggcatgga gaaaaagctg ttgctggaat
     6061 acggcggcga tatcgatgac gttcgcctgc gcttcgcggg ggaatactac accgacggcg
     6121 atagccagct tgtcgaggtg gaaatgcgcg ggcgtattac cgagattgac ggcggcgagt
     6181 ccaaacaagg cgaagacacg tccgttacct atgcgctgaa aaacacctat tacaagctgt
     6241 cgattgacga tcaatcggtg ctggaaattg acctgctgaa tttcatctac aagaaaaacg
     6301 gcaaaaacat ctacccggat cgcatcacgt ctgcgctggg ctgggtaact gaacaacctg
     6361 aatcatggcg gccacaagcc gcccggagcc tgtcaccatg aacacaccga atgaacacac
     6421 cgtaaccctg gcgacaccta tcgtgcgggg cgataacgcc atcaaccagg tgagcatcac
     6481 cgacgatatc aaacaggctg gctcactgcg cggcctgcgg ctggtcaacg tcctgaatat
     6541 ggatgtggat tccatcacca ccctgttaac acgcgttacc tcgccaaagc tgaagctggc
     6601 cgagattaac gcgatggata cccgcgattt catgcgactg gcggaggcca tcacgccttt
     6661 tttagtgcat gcggagcctg gcgaaccgaa cgcggaggcg acggaggaag cataaccgtc
     6721 ttgcagttcg accagataga cgatctggtc gctgatatcg ccgttgtttt taactggccg
     6781 ccctctgaac tgttcagcat ggatctgggc gacgtgatag cctggcgcgc gcgggcggct
     6841 atccgaagtg gagccagtga agccgatgaa aagccttgat atccgcgtag ccttcagcgc
     6901 tatcgaccgg ctgacccgcc cggtcaacgc cgcccgccag agtgcgggcg gtttgtctga
     6961 atccctcaaa cgcacccagg ccgcgattaa ggatctggat aatcagtcca gaaccttcaa
     7021 ccgcctgcgc gacagcgtac aaaagacctc acgcaagatt gatgaagcca gccgcagcct
     7081 ggacgggctg aaaaaggccc agcaaaacaa taccgtgctg accgataagc aacgggaaca
     7141 catggccgca ctggccgcaa aactggaacg gctgaacgtc acccgtgatc aggaaatggt
     7201 gaaactgcgc gctgcatcgc aggcactacg cggtcacggt gtatcgcttg tcggcagtaa
     7261 cgccactatc cagagcgcca tccggcgcac cgaacaatat aaccagacac tggagcgaga
     7321 gcggcggcaa ctggccgcgg ttacgcaggc acgcgcccgt tatgaacgca tgcaacagac
     7381 ggcgggcaaa ctgcgtggca gcggcacgat ggctgtggcg ggtggtgcgg ctgtcggata
     7441 tgcaggcggg cagtttctgg ccccggcggt tgggtttgat gaagaaatgt cacgcgttca
     7501 ggcgctgacc cggctggata aaggcgatca gcaactggcg gcactgcggg cgcaggccaa
     7561 aaagctcggc gcggaaaccg cattcaccac ccgcgacgca gccagcgggc aagcgtttct
     7621 ggcaatggct gggtttacgc cgcaggcgat acaagcggca ttgccgggcg tgctgaatat
     7681 ggcactggcc ggtggcatgg agctgggcga aaccgctgat atcgggtcaa acattctttc
     7741 acagttcaat ctggatgcca gccagatgga tcgcgtgggt gatgtactga ccggcacctt
     7801 tacccgtacc aataccgacc tgtctaacct cggcgaaacc atgaaatacg ctgggccggt
     7861 ggcggccaag ctggggatca gcctggaaga tgcggccgcg atggccggta tgctggcaaa
     7921 taacggtatt cgcggcagtg atgccggtac cgccatgcgt gccagcctgg cccgtctggc
     7981 ttcaccaccg aaagcagcag cggaggcgtt aaaagagctg ggcgtgtcgg tagctgacgc
     8041 caaaggcaag atgcggccaa tgcaagacgt attacgtgat ctgtacaagg cgaccaaaaa
     8101 atacggccag gtcgatcagg tgtctttctt caaagatatt gccggggaag aggcctttgt
     8161 cggtctgcaa acgttggtac aagcggccgg tagcggcgca ttgggtaagc tgtctggtga
     8221 gctgaagaaa gccaagggtg aagcggatgc tgtcgccaaa aagatggcgg ataacctggg
     8281 cggtgacctt aaaaacctcg acagtgcctg ggaagggttt cgtattcagg ttgaagagac
     8341 aacagaccgg tcactgcgca gcctgacgca ggggttaagc gatgtgatca ccactgtgag
     8401 caactgggtg agggaaaacc ccaggctgac gcaaacgctg ttactggctg tcggcggtgc
     8461 ggcagcattc gcggtggcgg tcggtggtac ctcactggca atcggtctgc tgatggggcc
     8521 gctgactaag ctccagctcg gcttttcgct actgctgggg tcgcggggtg tcggtggcgc
     8581 ggtgtcgatg ttctccgggt taggtagcct gctcggcggg ccgatggcac gcatgggcgg
     8641 ctggctacag cttttctccg gcagcacagg ccgactaacc gcgacactga ccccactgcg
     8701 tggcatgtta ctggccgtgt ttacctcgcc ggtgtccgca ttagggtcac tggtcagggg
     8761 cgttagcggg ctgttgttgc ggctgagcgg tttgcccgtg ctgtggagcc tgatcagcgg
     8821 tgctgtctcg gtgttaggtg gcgtgctgtc attgctgtta agccccatag gattgattgg
     8881 cgcggcgttt gtggcggccg ggctgcttat ctggcgattc tgggagccta tcagaacgtt
     8941 tttcagcggg atgtttaccg gcattgttat cagccttggc cccattcggc aggcatttac
     9001 gggcctggct cccgtctttg atgtgactgt gtcggccgtg tcacgcctgt gggatcgatt
     9061 tacgcagctt tttcagccta tccagaccac aaagaagacg ctggatgact gcgcaattgc
     9121 gggctatggg ttcggcaagg tgctagggtc ggcgctggaa atgctgttat tgccgttgca
     9181 aaaactgatg gaggggatcg gctggattct ggaaaagctc ggtttaattc cgtccggact
     9241 ggatgcggcg cagaaaaaag ccgatcagtt gaaagagctg acgccggaag ggaaagaccg
     9301 gctgcaaggt ctggtcgcca acctgacagg cgacctgaag gaagcaacca ccgcaccgcc
     9361 acccgcgcct aagccacccc tgaccgggga cagcggtacc caacgccgtt tacagaagat
     9421 tgccgacaac actggcggcg tgctggaaga aaccaaaaag cgcatcggcc ccggcgatat
     9481 cgttttcaaa aacctgccga aagcgctggc tgtgcgtggc gaatggcagg aatcccggct
     9541 tactggcggc acaccttctg ccccctcaca gcctgcgcag accatgcagg cgctcagcga
     9601 ccgccccgcc gtggtcgcgg caacacagcc catcaaacag gccgacgcgg ccccggtcag
     9661 tcgtccggca tcaagagcac cggcggcggg tgggttcaat ggggaaatcc atatacacct
     9721 gcacggcgtt gaacggcagg acgcccgcga gctgggccgt attgtggccg atgcggtcgg
     9781 tgcagaactg gcccgccgcg acaggcttca gcgtggcagt ttcagagaca gagagtaagg
     9841 agaaaaaccg atgatgatgg tatacgggtt gtttgtgttt gagctgcaaa cgttgcctta
     9901 ccagcagctt cagcagtcgc gcgcctggcg tcatgtgaag aatgagcgga tcaaccgttc
     9961 cgcgaaatgg caatacattg gcgcggggga agatcaaatc acattgagcg gtgtgctgta
    10021 cccggaaatt accggcggcg aggtgtcgtt aaccgcgctg accacacaag cctacagcgg
    10081 ccgcccctgg ccgttgattg acggcaccgg gcagatttac ggcatgtacg tgctgaccgg
    10141 tatgcagacc acgcgcacag aactgaatcg ctacggaaag gcaaagaaga ttgagttttc
    10201 gctgagcttt cagcgctgtg atgaagacct gcgggaaaag ttgcaatctt catcctttag
    10261 cgacctgatg gacaatgcgc gtagcagtgc aaacaaagcg atgaataccg tcagcacggc
    10321 catgacggat accgtcaaca cgttaaaagg gctggtttaa cggccctgtc taaacagggc
    10381 cgggtaagtc aggtggaggg aatttccggc cagttgatat ccggcgcggc ggcggtatca
    10441 atgcggctta attgcaccag ataggttttc catgccgtca gcgcggtttg ctcggcgtcc
    10501 gtcgctatgc ctaagtccgc tgcgtaaacc agttccgtga tccgcgccgt ggctgttgct
    10561 tttcgtgcag cctgttcctg ttgcgccgct gccacttctg cggcgtgttg ggctgcaaca
    10621 tcagttaccc aggtttcgcc attccattta tcgaatgcag tcgaggggga aaacagcgtc
    10681 aacccgtcag gcaattcacc gagagcggtc actgtctgcg gctgaccatc cgccgtgcgg
    10741 tacgccgtct tgccgcgcag gtccggtaca tgctcccatc ccgcaccatc agcgctacgc
    10801 cgcaaagcct gccccacagt tggcagatca ggcgcgtcag cgtagctatc agcgggtaac
    10861 cccgtgccga ccatcagata ttcatagctc gcgctcgtat actcgcgcgt cggtgggtcg
    10921 acatggtaaa cagtcagcca acccgcacgt tcagccagcc catttttgcc cagttgggca
    10981 ccctgtacag caacagaata tttctcactc attacgcagc tctcacgatg tagttaaagg
    11041 cgacattacg ggggcgtacc gttatccagt tcacgccgct ggaaaacacg gtattgctgg
    11101 ctgtaccaga aacaccgtta tcttttcctg ctccgcccga catcagtacc ccgttggggt
    11161 agccctgatt ggtaaagttg acagtgtttg cgctgctgtc tgcgtctgca tacccgatac
    11221 cgatatacac gcccgtacta tcagcatcgc tgccgttgta atccattgcg ccagttcgca
    11281 gccccgttgc attctgtttg ctgataatgg tgcgcccact atccacaccc cgcccgtcat
    11341 cccatccccg gataaattca ccgcgtagat ctggcaacac acccgttggg tacacgcctg
    11401 ccagtttggg atagagcgtt ttatcaaacg cctgaccgtt gcatttcagc cagcctgtcg
    11461 gtgctgtcgc ctgcggccac ggcagcggga tccccactat ctcggcgata tccagtttta
    11521 gcttattcgc cgcagtgaca tcggttgata atgcgtactg cgggtgaggg ttggcggtgg
    11581 agaggtgcgc cgttatcaga ttgtcggcgt aggcttttac ttcaatcttg gcgctacttg
    11641 tctgggcatc gctataagac tttgcttcgc ccttgacacc atttatcagt gcatcggtgt
    11701 agctcttcgt ttcagtcttt acaccgctaa tttggttatc ggtgtagagc tgtgattctc
    11761 cctttgcact gctggcctgg ccgtcagcgt aggctttcgc ctcggcggct ttagtatcgg
    11821 tatacgcccg cgttgccagc accacagacg ggtcgatttt tagcgttacc gcgtcggtac
    11881 tgctgacaat caaaatcatg cgtaccgtct gcacccggcc ggatccttcc tgtaactgcg
    11941 gtttgtaggt ttccgggcag ttggcgatgg cgatcagatt gccgttggcg tcatacagac
    12001 cgatttcccg tatgcaccag ccgccctcat cttcggggat cacctgctcg gcaataatct
    12061 gactcgggtt agccgggtct acactcagag agttgagcgg tgcccggcga cgctcattga
    12121 ttagttttgt ttgtgccggg tctggagtcg gtagggtgcc gccaccgtcg cccagcgcca
    12181 tttgtgtaat cgggagttgc cgcccgagcg cggtggcgtt cgccagcagt gccgcgccgg
    12241 tgtttgtcag caaggcaaaa tattttgtcg tcatgtattc acgctcacgt tatcagaaag
    12301 atgtatcgca ccaccgcacc tgtcagcgcc ggttgtagta atggtttcag gaaagtaggg
    12361 gtagacagtc agtgcatcgc cactgtactg accagcagcc agcggaatat cacccgcgca
    12421 gtccataacg atatttagcc ccagcaggtg acggctcacc ggctttgcat ccgcaattaa
    12481 gcgctcaagc tccagatagg tttcttcggt gatgcccgca tcctgcacgc cgatatccag
    12541 ccggaaggtg ccgggtacgc cgccggtctg ccaccactcc gtgatccgaa tcagatagcc
    12601 gaacggctcc accacccggc gtagggccgc gatagtgccc ttttgacggt gtaccagcca
    12661 tgccgccttg atcacctggc gtttggtctg ttctgaccag cgtttatccc agcggtcaac
    12721 cgacagcgcc caggcgaggt acggcagtaa ttgggcgggg cagcgctcgg cgtcccataa
    12781 cgtatccata tcgactgcta tctcactcag gcgctgggtg gagctggcga cgtggcgcat
    12841 aaagtcgctg gctgatgggg gcagcaggct gttactcatc gctgccgccc tcggtgaccg
    12901 tgaaccctgt gcagtacgct gcctgcgtgt cgctgatcac gatgtcctgc gccggttcca
    12961 gcagttcaac gcgttgcacc ccttgcacat gcagcgccgc cataatggcc gagcgagcca
    13021 catcgcgccc gatgcgccct tgcgtgccga gccatgacgt taacgcctgt tgtgcagcct
    13081 tctggatcgg ctctgattcc ggccccggat agcggtacaa caccgcagta attgcatagc
    13141 gcacaatctc agcgctttgc accgtcaggc ggtcaccaac cgggcgttta tcatcggcag
    13201 acagcgcggc atcgaccgtc gccagcaggt cagctgaggc gctgccatcg ccctcggtgg
    13261 ataacaccga caccaccact accgccggtg acgggctgat cgcttttgca tccgctacct
    13321 ggccgctggc acttttggcg aaatactcat acgcaccggt tggccccgcc acgctcagcc
    13381 cttcaaaggc tgcctgtgcc cgtaaacgta gcgcgctgtc accttccatc acggcatcgg
    13441 cggtgtcggt cgctttggta atggtcagtc gctgggtgtt caggttggcg gccagattat
    13501 ccagatcgga tgacacggca tgactgagca ggcaggcttc cgcgccttcg ttaatccgct
    13561 ggcgtaacat catttcccgg taggcgatca cctgcgctat cacggttaat ggctcggact
    13621 ccagcgccag cgcagcggtc acagacgcct gctgagcgcc cggaaaggcg gtaatcatca
    13681 ccgctttcac ctcctgaagg atgacttcga agtccagcac ttcaatgatt tgcggctggg
    13741 gtaactgcga taaatcaacc gtcgccatcg ctgtcactcc tgagcgtaag ggtagatctg
    13801 gccgcctgca tcgtttcggt aatcaaccct gataactccg cttccaccgc tcccgatgct
    13861 gaataacgaa tatcgacggc attcagcgag atacgcggct cccagcgcgt cagggcgata
    13921 acggctgcac tcatcaactg aagccgcgtc accgcattct gcggcgcatc cagcaggtca
    13981 gggatcaggc tgccataatc ccggcgcatc accctggatg ccagcggcgt cgtcagaatg
    14041 tcgcgcaccg actgccagag ctgatcggca tcggtcaggg tgccggtgcc atgcggattc
    14101 atgccggtat aggtcgcggt cattgtgtgt cactcgtcca gctaccgccg ggctgaatgc
    14161 caccgtggcg atggttatcc acctgaacgc cattagaggt catcgcgccg ccagaatgtg
    14221 ccacgtcacc ggccagggtg ccgccgtggg tgatctccac ggtgcgggcc ttcaggtgct
    14281 gagtgcattc caccaccggc gtattcagtg tgacgctgac cgaggccacc acgttggcgg
    14341 ttttcatgcc ggtggcttcc agcgcaccgg ctacggcgtc ataccgaaac cgggcgccgt
    14401 ccggcgcggt gatcacaatt tccttcaggc tgttgccggg tgccgggtgg gcttcactga
    14461 acagactgcc gataatcacg gcggtttccg ggttaccgcc aaggcaaccc agcaacacct
    14521 gttctccgac ggcaggcggg aaccagacgt taaacgcccc agcgcgcgtg gtgttccagc
    14581 gtagccagtc ggtgagcaat tcaccgctct taacgcgcac ccgccagctt tccgggtcaa
    14641 ctgccgtgac aacgccgaca cgcaacaggt tttccagtaa tcgcatcagt tcagcgctca
    14701 tgtggaagca ctccccagac tgttgatcac cgtgtcctgg atcaggcgtt catcagctgg
    14761 ggaaatcccc agcagttcac gcaccgggta gcgggcaaag gcacccgggc ggaccttgtc
    14821 acgctcgccg tactgatgca cgcgggcaat acgggcggcg ataccatcaa agccgacgct
    14881 ggcaccgtcg gtatcagcct gcattttgag aaaacgataa ccgcgcaggc gctgaaacat
    14941 cggggttgtc ttgctggtcg tgcggcgcac tgcctgcgtg ttgatctcga tataacgctc
    15001 aatatcgctg cggtaaaacg tgcggatggc gttgcggtct tcatcaaagc cggtgatcgt
    15061 gcggccgaat tttccccggc cgccgtgcca gttcttcagg tggcgcacct ggccttccca
    15121 gacaaagacc attccttttt gcgaacgcag caccttgcgg cggcgggtcg cataggctga
    15181 gccgtccggg ttcctctgcg ccctgatgcg ctgctgctga ctacggcgca gtgcctgccc
    15241 gacctgacgg gccgttttca gccgcccggc gggtgacagg ccggaaagga tgtcatcaaa
    15301 caccttatcc agcgcgtgaa ataatttatc cgtcatgccg ctgcctcccc ggtggcatcg
    15361 tcaagcaccg catcccatac cccgctggtt aggcgcggac gaggttcagg caggtgttca
    15421 gcacgcagga tgccgttatc gtcgcgtgtg accctgaccc gctcgcgcac cgggatttca
    15481 aacagaatgt cggcgctgtc gtcgttgttg ataagcgtgg tgaatttcac ctcgcggttc
    15541 ttttgcgggt tcagcaacag gtcgggctgg ttctgccaca gccaggccat cagcggtaag
    15601 gtgaaatcgt cgatatcgcc ggtgaagttc atcacgaaca gcaccagcga gtagcggtac
    15661 agaaacgacg gcgtttcccc ggtggtttca atgcctcctt cttccacaaa cacagtgaag
    15721 gcttccgggt tggcccggca ccaggtactg gatgccgtca gcgcgtcgcg cagcgaatcg
    15781 gttttcagca tgagcattcc cctatggtgt ggtggcggcg tccttcaggc gctgaaggcg
    15841 acgcaggtat acatcgttga tggcggcctt gtctgcgttg caggtgtcca gcgcatccaa
    15901 aagctgatca ctccagagtg cgacctcgcc ccaggtcacc ggcgttttca gtacgggcgt
    15961 cggtgtgggt gccgtcaggc tgggcggtac cgggtcgtgc agtatctgca cgctggacga
    16021 cagcggcgcg tttttgcagg ctgtcgctga cagcaacagg caccacagtg ttagcgcacg
    16081 tatcgggctg catcccctca cgcatctttt cacggcgttc ttccccttcg gcataacgct
    16141 gttgctcacg ctcgcgcacc tgcgccagca cgtttctggc atcgtcagcc agtgcccgga
    16201 attcggttaa cagctcgcgc tgttgttggg cgctgtcggt cagtgcctcg gtatgcgccc
    16261 ggtcaatgcc gcgctggtag gtttgccaga gcacaccaca gacggccagc accagcagca
    16321 cggcaagggt ggctgccagt ttcatggcac accagccaga tcgcgcaagc accaggcttt
    16381 aaagtcgctg cgacgattga ccagcccggt ggatcgctgg ccgccgctgt tgacaaaatc
    16441 ggtcagccgc tcacacatcg cgggccattc ctgcgcctgc gcgtgtttcc agatggtggt
    16501 gcgctgcttg ctgccctgcc ggttggtaaa ccacatcagg ccactgcaac cgaggttaaa
    16561 cgccgtgtcg gtcatggctt cgaacgccga ttgcggcatg gcagcgccgt taaaattgtc
    16621 gttgacgcag ttttctgctc gctgcatgtc gttaacccag cggcgggcga tctcgtcatt
    16681 gctgtacggc cggttttgca cgttaccggt agagccaatg cccaccgtca gcacgccggc
    16741 ggggcagtaa tacggcgacg cccggcagtc ttcccaactg gccgttttct gctgtgcttc
    16801 cggcgacgtg cgcagggtac cgggggacag cgtgacgccg agcgccacaa tcagcgcaat
    16861 cgaacagcgt ttaatcgcgg ttttcatcgt caacgtcacc ctgatgcaaa atagccaccg
    16921 cgtggcgttc cgacgtattc agcgtgcggc gttcggactg ctgtaaaatc tgttcaatca
    16981 gttcattgcg gcgtcgctgt gcgcgttcga tacgacgtcg gaacaaccag gcgcgccacg
    17041 cggtgacaac accgataacc aggcccgcca gcgcgacttt ctcactgacg gtcatcaccc
    17101 cgatgccggt caccatcacg gacaggccat aggtcacccc atcattgagg cgctgaagat
    17161 cgtttaatcc cataactgca ccgtttcctg ttctgtctga cggggaatat caggcagcgt
    17221 gatagcctgc ccggccgtca gaaacatctg gcggcttaac cccggattgg cggcgatcac
    17281 ctgctcggtg ataccggcgg atgtgccgta atggcgataa cagagcaagt ccaccgtatc
    17341 gccctgaagc gcccagacca ccatcagcac aactccgcaa aaagccgctg ggcaccgcgt
    17401 atatcagcga tgctccagcg cgcatcacgc cataaatcgt cacactggtt gtcaaaggtg
    17461 tccgttgcct tgtcgccttt ggccgtggtg tccacatcgc ggtatccctc cagcaacagc
    17521 gcgcgggcga tggcataaac cgcacgcctg aaacggtaca ccttgatact ctcgctgttg
    17581 acctgtctgg ccggaacgtc cgccagtgcg gcatatccgg cggcctgttg tgtctgctgc
    17641 cagtccgtca actggtcagt cacatgcaca accgcttcag tggtgacgtg catcaggcgg
    17701 gtggtggtga taccgccggt gatgcgggcg gccaggcgca gatcgcgcag gacgatcacc
    17761 ggccagaact ccccggcgct gactgccgcc gcgccgtcgt caatctccgg tacgtcaccg
    17821 ctgtcgctga cacgtttttg agctaccagg ctcatactca actctcccaa aagtcaggcg
    17881 gtgggcaccg ggcaaaaaga ccgtatacgg gcagatcacc cggcgcgccg cctgtcggac
    17941 ggggccgaag tcgttaacgt ttggcagact gacgggcagc tttacttttg cccgtcgccc
    18001 gtgtggtttt ccgcgccgtg gtgttacgta cggcggcttt ttttaccgct ggctgcgcgg
    18061 cggtggctga agccgcaggc ggtgtctctc cggcgggtgt ttccgtggtc gtctcatcgt
    18121 cgccgggcgc accgtcttcc ggcgcgtcac tgctgcccgg catgagcttt ttcagctccc
    18181 gcgtcagggt ggcgatctcc cgtttcactc ccgcgttcgg attgcgggcc atcgcttccc
    18241 ggaacagtgt cagtgcctcg gctttggttt gtgcatccac tgccgcacgg cgtgagaagg
    18301 cgcgggcttt gcacagcttg gcacgcactt catccggcat gtctttgcca tccacaatcg
    18361 cggccacttc atccagcacg gcggtatacc cgctcaggtc ggcgtctgca tcggtggttg
    18421 ccagcgtcaa caccgggttg ctcacttcct cagccagtac cgttaccgca tcgcggcaga
    18481 acttgtcggc aggcaaagac aggccatgct taacgacgta acgccccagc ctcagtgtca
    18541 gtgcgcgatc ctggcagtcg atcgcccaca ccatcagggt gacgatcact tcgtcctgtc
    18601 ggccgctgtc gccttccagc gtgccatcaa tccagccgtc atattccggc agcatggctt
    18661 ttttcatctc cgctttggtc gcatcagatt gcacctgttt cagcgcggcc tgatgcaggc
    18721 gcagacggtg aaggatttgc tcatgggccg tgcgtgacac cgccgtttcg gtgtccgcct
    18781 ggccccggcg ctcggccatg acccgctgaa aatgtcgttg tgccggtgtc agcatggtat
    18841 gttctccggt tggggcggag tgttaccccg cctggctgtt actggccgtc gcctgctgcc
    18901 tgcgcaaact gaatcccgtc gatcagggcc accttgccgt agtcctccac cacaaagtcg
    18961 tcgttggacg actggtaagt ggcgacccgg ttgtactccg gttcttcaac gatgctgcgg
    19021 cgcagcgccc ccagttggta atagaccgac agatttttga acgaggtgat cagcaccgcg
    19081 ttggacggga agtacggtgc caggaaggtc ggcaggccgc ccacacgctc ctgactgaca
    19141 atcaactgac cggccagcaa ctcggtattg gggttgctct ggctcagtgc attaaggcgc
    19201 ggaaaattac tggacgtcag caggtcagac gccatgatca ccaccagatc cggtgccctg
    19261 cgatgccacg gatccagcag gctgtttttg gcgtcaaaca cagcggtgtc gaggttgccg
    19321 taggtgcctt tggcgacaat cttgttgtct tcgtcgcggg cggtcagcgt gacgtttttg
    19381 ataatgcggt gccccgcatc gttgcggatt ttttgcagcc agccgacacc gcaatcctgc
    19441 aacagcggat tggcgctacg gttggatttc tcggcatagg tggtgccgtt gaaaccgatc
    19501 atgatgcggt caaggccgat ttgccgcgca ttcgcctggc tgatcagcgc ctgaaagttc
    19561 ggctgcgatg cccaggcgtc caactgtggg taactgaccg ccgagtcata attcacctta
    19621 cggcaatgat agtcgttagg ctctttggaa tggttgtcag ccggattgcg gcgggacgtg
    19681 ccatcgctac tgttattggt gctggcaatc ggccctttgc taccgatcag gattttctga
    19741 ccttcctgag ctttcacacc aaatacgtta atctgcttca gaaattcatc gctttcctgt
    19801 gcggcctgct ccatacgctg ctgggcagca ggcgtcacac tgtacgccat cgccaccgca
    19861 ttcggctgca ctccattaag ctgggcctga cgtgatatgt actgatcaaa aagattacgg
    19921 gtagagtttt ccatgttcgc ttgtctcgta tcggcttaac ggtagttaaa agtcagccag
    19981 ttgtacgctg ctgttaccac cgctggccgc cgggcgctgg ctgtaactgt tatcctgcgt
    20041 cgccagcttt tgcgtgagtg cggccagttc gctggtcagc gtctgaatgg tacggctgtc
    20101 ctgctgttgt tgggttttca gcgtgttgaa actgtccagc aggtcagcat gggactgggc
    20161 gacgttttcc accgcctcac gcacctggtt aaactgctca ctgtccgatt tacggccttt
    20221 gccgataatc cccatcacgc gggaaaacca ttgcttcccc tcgtcgctgc gctgttcgga
    20281 cagctcgaca agttccgctt ccatcgcttc ggtgaacatg accggctcac cgggcagatt
    20341 gttgaatgcc tgcacctgtg cccgttgctg tgccgcgaac ttcaggcgat cggtgcccag
    20401 gctggccggg gtatccgtca tcgccaggcc gcgcagatac ggtttgccgg tcgcggcaaa
    20461 ctgcgggtcg atttcgatac tggaataaat cttcttccct tcgctggtga gcttcttcat
    20521 tcgctcggtg ggttcgattt ccgcatacaa cgcggcacgg ccttttagcg ggccgtcggt
    20581 gatgtcttcc gcgctcagcg caataacatc acccatcgca ctgaaatcac tgcccggata
    20641 gggggaaaga atgtgctcaa cgttaacgcg ggcaccgtat acctgcgggt tgtagctttc
    20701 cgccattgca tagaggtggt cgcgcccgat ttcacgcccg tcaacggtgg agccggagac
    20761 ggcaacccgg aattttttgc gggtcggttt agctgtaccg ctcatgcctg tagtcctgtc
    20821 ctgtggtgtc tgtgacatca tgattgcaga gcctaactcc ctgtctcaac gcggttttgt
    20881 tgtcggcgga gggccagagc cgaaagtgag cgaaaggcgg atcgcgcgcg gggtaatctt
    20941 cccggcaaag ggggaaaccg cgcatgattc aggacgcatt tgtacggcag cgagcaaaac
    21001 agctttactg gcagggctac ccgccagcgg aaatttcgcg cctgatggga attaatcaaa
    21061 acacggtgta tgcctggaaa aagcgcgacg aatgggacga gacgccgcct atccagcgcg
    21121 tgacgcattc tatcgatgca cggttgtgcc agttggccca gaagccgact aaaaccggtg
    21181 gcgacctgaa ggaaatggac gcgctaaccc ggcagttgaa aacgctgaat gacggccagc
    21241 caggcaatgc cgcaggcagc aagaaacccc gccagcgcaa agttaaaaat cacttttctg
    21301 acgaacagat tgccgcgttg cgaaccaaca ttctcgactc actggcctgg catcaaaacg
    21361 gctggtatga gcaacgccac caccgaaatc gcatgatcct gaagtcacgc cagattggtg
    21421 ccacctggta ttttgcccgt gaagcgttat tgcgggcgct gcgtgatgac gtggcttacc
    21481 cttatcagcg ccaccagatt tttctttctg cctcgcgccg tcaggcgcac cagttccggg
    21541 gctttatcca gaaggtggcg gaagaggtgg acgtcgaact aaaaggcggc gacaaaatcg
    21601 tcctgagcaa cggggctgaa ctgcattttc tcggcacgtc tgccgcgacg gcacagtcct
    21661 acaccggcaa cctgtatttc gatgaatttt tctgggtcag caactttgcc aacttgcgca
    21721 aggtggccgg ggcgatggcg accctgaagg ggttgacgcg cacctacttt tccaccccat
    21781 cgagtgaaac ccatgaagcc tacccgttct ggacaggcgc acgctggaat gagaagcgca
    21841 gcaaggcgca aaaggtcgcg tttgatgtgt catggaaagc actcaatagc ggtttgctat
    21901 gcccggataa aacctggcgt cagattgtga cgctacagga tgtcatcgat catggctggg
    21961 aatacaccga cctggaagaa atccgcgacg aaaacagccc ggatgaatac aacaacctgt
    22021 acggctgcga gttcgtccgt gatggtgagt ctgcctttaa cctcaacctg ttatttagct
    22081 gcggtgccga tggttacgac gagtggccgg actggaaacc tttcgcgtca cgcccgatgg
    22141 ctgatcgcgg cgtctgggtt ggttatgacg ccaacggcag cagcggcaac ggcgacagtg
    22201 gcgcgatctc ggtggtggta ccgccactgg tggcgggcgg caagtttcgc accatcgaaa
    22261 cccaacagat acgcggtctg gagttcgaag aacaggcgaa agtgatcgag gcgctgacct
    22321 tcaaatacaa cgtgcagcat atcgccatcg atggcaccgg catcggtgaa gcggtctacc
    22381 agattgtgaa gaaattcttc ccggcggcgg tgtgcttcct gatgtcggtg tcatccaaac
    22441 gcgccttagt gctgaaaatg cttcaggtca ttcgtgctgg tcgctgggaa tacgaccgca
    22501 gcgagcaggc actgatcaat gcgttcaacg ccgtgcggcg cgtcaagacg ccgggcggca
    22561 tcatgactta cgacaccgac cgcgcacgcg gctctaatca tggcgatctg gcctgggcaa
    22621 ccatgctggc cgtcatcaat gaaccactcg gccaggagca gggcggcggt ggctttgcga
    22681 tggagttctg atgaaaagaa aagataaaac cggcacacac cgggcggtta ccgccagtca
    22741 gccggatatg gcggcggccc tgaaaagcga cccggggctg agcgcgttta cctttgacgg
    22801 cccctatccg gtcagggatg gccatgacct gctggataac atgtattgcg ccgacaatgg
    22861 ccgttattac gacaccccgg tggactggta cgggctggcc cgcgcatttg gtagcgcgtc
    22921 atggcaccag tcggcgctgt acttcaaacg caatgcgctg accgggtgct ttatcccgca
    22981 cccgttattg tcgcgtcagg cattctccgc cttcgtgctc gactggtttg ttttcggcaa
    23041 cggttatctt gaacgacggg tcaaccggct gggcggcgtg cttgccctgc gtcacgttcc
    23101 ggccaagtac acccgacgcg gcagcgatct gaatacctat tggtttatcc ggcagtggaa
    23161 agatgaacac acgtttgata ctgacagcgt gtgccacgtc atcaacccgg atattcacca
    23221 ggagatctac ggtatgccgg agtacatggg cgcgttgctg tcggccagcc tgtcgcactc
    23281 cgccgatatg ttccgcaagc tctactatga caacggttcg cacgccgggt gcattatcta
    23341 catcggcgca tcccaggtgg ataccgaaag catggataac gtgaagaaaa cgctgaagga
    23401 agcgcgcggt aaaggcgcgt ttaaaaacct gctgttacat gcgccgggtg gcggtgaaaa
    23461 aggggtgcag attattccct tcagccagat atctgccaaa gatgaattcc tgaatatcaa
    23521 atcggtgacg cgtgacgaca tcctcgcggc gcaccgtgta ccgccgcaac tgatgggcgc
    23581 tatgccggaa ggcaacggct cctttggcga tgtggagaaa gccgcgcggg tgttcgccat
    23641 caacgagctg atgccggtga tggaagcact gaagcatgtg aatgactggc tggggatgga
    23701 ggtgatccgt tttaaccctt atgccctgtt gaaagccgag tgatatcctg cccctgccgc
    23761 cgcacccacg cggcggtttt tattcaaaaa ctttcacgtc acccacgcac aatctctttt
    23821 cagatcaacg gctaacgcca ccatttccca cccacataaa accgcatcag cgccacgcca
    23881 tcgggcgctc tcaccggatg ccgcgccgcg tctcccgaag ggaaatacgc acgcggcagg
    23941 gcgggaaatg ggccggattt ggcacatcaa aggcgatccc tgcctccccc caaagcgtgg
    24001 gcctttcccc cgtcacctgc gcgctgctct cgcttcattt tttgtgcaag tgcagaaacc
    24061 ggcccggcgc gcgtgcgtac cgggcggaaa ggggaaaaat agcatcaaaa aaattgtgca
    24121 aaattgtgca ggtttgttca agaatcagtt gcagcttctt ctatagcctg tgcatatgaa
    24181 ggattgctag ttgggttctg aagttctaac gtcagcccac gtttcccatt gtgtatatta
    24241 catacgaaat ttgattttgg atctctatag actgttctgt actgtcccgg ttctgctttt
    24301 atatcccaaa ttccaaacag tttcgcgatt cttgccgcga tttcaggtgt aatcttcatt
    24361 atccaatcct tttgtaatta ttgatatttt gttaaagctg ccggtgatac atctaacaat
    24421 ttagctatac ctgttttact catcccagca tttctcagta tgtaaattag atttttacca
    24481 tcgtcagtaa tgcgacctcc tgaggttttt gcgatgtcaa taatgctgtc taggatttca
    24541 actttttttt ctaattcagc tagttgcttt tgtattggac tgattgccat agtctgtttt
    24601 cgctcaatgc aattaattgt gctttaaact taactgcaat atttaaaaca ttcaatcatt
    24661 ttttttaatt tttcattcag tgtctcatga ttttaaagcc cactatctct ggtgggccat
    24721 agcatcattg attcttttta aaccatgcga acatagatat gcacactcat aaatcacaaa
    24781 atcatctgct caggccgaca cccatacagt tcagccaatt tttcgcgggt tttcttttgc
    24841 ggtcgagagt cttttgcttc ccactgagac accgctgatt gcgtcgtccc cagccgttcc
    24901 gcgacatcgt actgagatag tccacggtaa acacgccagg cggctaacag actgatatcg
    24961 tcactaaaca taatgttgac cacctcattt ggcacggttt catcatcatg ctcgtcggcg
    25021 gcatagggaa tggattcata cccgctatcg tcattagaga gcaggcgctc gtacacatct
    25081 atcggcaaca caacgaattg cggattgccg tttaaatcgt tgatatattg tagttttgac
    25141 atatttttta tccgtgtatc tatgagtcgc ggttcgttat gtcattgaga aaacaagcgg
    25201 gtttccccgc cgattagtag gttgttgacg ttctgcgttt aacttctttg atttcgcaga
    25261 tcaccggttc gcctttggta atttggaaaa tgatccgata gtcgccaacc ctcagcctga
    25321 acgcaccttc ttgccccttc aatgggacaa tatccagcct gacagctggg aaattttcca
    25381 gctcagtcac cttttcactt attgcggcct gataccgttt gtcgatagtc agacgttgtt
    25441 tcagtgcttt cttcgaccag atcaccctta ccatctgttt cctcagtttt taaagagcat
    25501 atccgctagg gataagacaa taataagata tttagacaaa aaaacaacga caacttatta
    25561 tctaatcttt tctctctgac tcaactcaca cagcgccgcg actcgctgca tcaaaccagc
    25621 tttatcaacc tgctgtttct ctgcttcacg atacagttcc ccgtttcttc tggcgtaata
    25681 acgataccca caaaactcaa tgggatgacc cgcagccagc ctgcttgcct ctcctatgct
    25741 gatatcccag ccgattgagc gggcgaaatc ggcaatactg gcgtgccact cgtccggaag
    25801 tttgccaacc gcctgttttt caacaaattt gttccgttga gtagtgggcg agtgttgatt
    25861 attccgccga tccggcggtt gtgttcgcaa cctggacagc agcgcccggc gttccgggtc
    25921 ggtcatgcgc tcgaagtcgg tgaaggtttg agcggatgta tcgccaggct ctccatctgg
    25981 cagttcacaa ctaccatagt catccccgtc tatacccgtt ggaatggatg ttttttcatc
    26041 gcccgtagag ttattgacag aactccaagc gtcgccggtt ggcgacgtaa cggctaaacc
    26101 actcccagtg ctaatgctgg caccatcgtc aatggcctgt tttttgcgga ttttccattt
    26161 gactaaccgg gtgcagatac gggatatcgc ccccagacgt ggagagaaca caccgaagat
    26221 tttttccggt gtctcaccgt aggtgttttg ttcgtcagca tcttcatagg caatgcgcac
    26281 ggtgtagcgc tcgcgtggga tcaacacgcc gccttgcttt tcgatgtacg ttgcaaaaca
    26341 accggcatca gccgatgcca atacagcatc catttccggg tcagcaagtt gcgcagcccc
    26401 gcgcttgaac gtgccgtttt ccttctgggc tgcggtaagt tggtttgcca ggcgacgcag
    26461 ttcacgccat accgttaccg gcggcagacc gaacggctga aactgtcgga tgttatgctg
    26521 tgatgcccag gccatcgcaa actttgccgt ttcgcgcaat ggcttgccgg tttcgttatc
    26581 cagctcacca tccagcgcgt aaccgtcgat atttttactg atgtacttcg ccacgtaagc
    26641 cgtcgcgctg ccttttctcg gatcgagctt tttagccttg aatcgtgcgc cggtgttgcg
    26701 ccccagctcc gcacggtctt cagcaataaa atactcacgc aagatatcag tgatggcctt
    26761 tctgtcggca ggtggcataa acagcaacac atgccagtgc ggggtagcgt cgtggtgcgg
    26821 ctcggcaacg cgaaagccat aagggcgcaa gccgcgacgg tttaacgcag acatggcacg
    26881 cgcccaagtg cggcacaaat accgctgccc ctgacgagga gaagcatgat cccatttagg
    26941 gttttgatga ccgttctgga tgttagcgtg gtaacgcgac gggcaggtga tagtaaggaa
    27001 aacaccttca tcaccccgcg cgattgccac catttcaaca ccggccatgc gggtcatcag
    27061 ctcatgacgg cggatagccg gattactgat actgccgtac accatgtttt ccagtgatgc
    27121 gatgttgcca tcttcatcaa ccagttcatg tgtctggaaa aaagcgcgat tcttgcgacg
    27181 ctgttcttgc cactggttga gggcatcaag gctgacatac ggcattcgtt ttttgtggat
    27241 cacgccgatg gcgcgaaact gattttcccg ccattcacaa cgcagtcgcc acagtttccg
    27301 cccccaccat tcaggtgaag taatacgtaa aatagcggaa taaatgcggt gtcgaacttg
    27361 ttcatcaccg atgatcagcc cccagcatgg cggcgtcaca cgtaatgcca gcagttcgcg
    27421 ccccaggtgg cggtacagcc actgaatttc atcgtcggtc atgtcttccg gcgatatgtt
    27481 gccgcactcg gtttcaaaca tttcagcgac ggcagccgca agggtatgcg cggcattgat
    27541 cacttcatgc ttggtaaacc cggccagatg cgcccaacgc ggcccccaat aggccgccag
    27601 ttccgatgca aagccatcac gcacaccttg ctgtgcgcgc acagcatcca gacgcagcag
    27661 ggcttttttc acggttccca taaaaaaggc gctgatgtgt cgcggctcgc ggttagcgcg
    27721 caaccattcg attttttggc ggtaaacgtc acggataaag aacggttgtt cgtgcaagcg
    27781 ggcttccacg ccttccggcg ttttcatcca accgctgacc gtttcttgat gatcccagcg
    27841 cactatttcc gccagaccgc gacggatacg caactgggtg ccgttcggct cccggtgctc
    27901 caactgcgcc acggcttgat taagattccg gttatcacct ggcgcggcca gagcgcgttt
    27961 aaccatccgg ctcagatgcc gtgtgacggc cggatgcggt tcagcatcgg taacgagtag
    28021 agaggggcga agatcagcca cgcccgactg tgcggagatc gccgggcgtg gagcattcca
    28081 gggataggcc cactgttcag gcatcactca caaaccccgt cacctatccg tattgcaaac
    28141 acgtttaccg gtttgtcgcc aaaatgcggg tgtgtaatcg tctgcatttc atagccgagc
    28201 cacggcagga tcaggcggcg tgacatatca gaacgagccg gatagcccca tgtaatcacc
    28261 agttgctcat aatcccgacc aatgagccga cgccgccagt aagcattgtc caaccggtat
    28321 tcaaagggct tcatcccagc cttcattgcc gcgaaatatt cacccatcac cgcgagttgc
    28381 agaatgctca cagacaaccc cctatggcct caacaacccg gcacatggca acgggaggca
    28441 cagcattacc cgccatattg acggtcagac ggtgactttc tggcgtgata tacaatgacg
    28501 gaaaagacat tgcggccatt acttcccgtt ttgtaatcat ccgcatacgg tcaccatcta
    28561 cgatggccca cctgtctctg gttgtgattg ttccgatggg gcggttcaga ctgcggcctg
    28621 tttttgtatt tccgtaatag ctgaaaatga atcgctcacc gaactggcgg cgaccacttt
    28681 cgatacgctc taacgttgat atcgcacgac ccggacgatt tattggtgac catttcccgt
    28741 catcaaaatc aattaatgtg ccggcggaaa catgactgat gcgaggcaga gcgagtaata
    28801 gcggggagcg gctgagggta catacaagaa ataggcggat gcgattctga ggaaccccta
    28861 gatcagcgca atcaacaata tgcggcgata acgcataccc caacgccgcc attgccgccg
    28921 cccatgccgg atacaacgcc caattcagaa attcaggcac attctcaaca atcacggctg
    28981 acggcctgtg atattccacg gccgacacaa cagcccaagc ggttgagcgg ctcgcatcat
    29041 gctgtggatt cccggcggct ttccctcgcg cacggctatg cccctggcag catggtgacg
    29101 ccatcataag atcgtgcggg ggaacattac tccagtcagc ctgatgcaag tcctgacaaa
    29161 cgtggattgc atcaggatgg tttaaacgat gatagtcaac cgcagcgggc cagtgattag
    29221 cggcccagac aacttgcgca ccggccatac gtgcgccggt tgatgaaccg ccgaatccgg
    29281 cgaagagatc gatagccttc atcatgccgt accccgttca gacaccggca gacgcttagc
    29341 aatgatttcc ccggcctgct tgctctcccc agccgcaaca ccgacgctac gcggcgcggt
    29401 gaaacggcag atatcaaacc tgtggtaaag gctgtgtgcg tggtgagtgt cgctgttgga
    29461 cgcgatgaca ggtatcccgc gctcggccag gcgtgataac gcgctgcaca agtcatactg
    29521 atcgttgtgg gtgaaaccat cagtgtgata actggtgaag ctggccgttg gcgtttgcgg
    29581 gatatacggc ggatcgcagt acaccacatc gccggggcgg atcagttgca atgtttcgcc
    29641 aaatgcggcg cagatgaatt ttgcacggcg ggctttttcg gcaaatgcct gaatctcggc
    29701 caatggaaaa taaggcgatg cataatgccc gtaaggaacg ttaaacccac cggcgcggtt
    29761 atagcgacaa acgccccggt aaccgtgtcg gttcagataa agaaacagtg ctgctgaggt
    29821 ggtgcgattc tctttgctgc ggttaaatac ctgacggaag cggtaataac tttctgctgt
    29881 attcgcagtg cgaaacagac cttcggcaat atcaatgaat tccttcacat cctctttgat
    29941 gacctgatac aggttaatca ggtcagggtt gatatcagcg agcaggtatt ccgggtaatc
    30001 ggtattcatc atgaccgaac acgacccggc gaacggctca accagacgat caccagccgg
    30061 taaatgctcg cgcaggatat ccattatgcg ggccttgctg ccgacccatt tcagcggtgt
    30121 ggcaataatg ctcataacgc accccgatag tgtttgtttt tcagttcagc atcgccctgg
    30181 cagtacacgc acagacgcac acccggaacg gcctcacggc gggcttcggg aataggtgca
    30241 tcacagcttt cacagacgaa tgcagaaatg gcacagcccg actgttgccg ggccttctgg
    30301 atttgcgttt cgcggatgaa cgcttcgcgc tcttgagcca tgtcaatcga gtccatcagc
    30361 tcagcccctg agcagagcgc tcaaaacgtt cggactcctg gcgtatcagt tccaccattt
    30421 cggcggcgga aaggtcgcgt tgttgagcgc ggacagccag cgcagcaagg cgcaatgaga
    30481 aggaaaaatg ctgatctttg cgttcctcca atcgggcctt tttcagcagc tcgaccaatg
    30541 cgccatcatt ggcgacagtc atggttttta cttcggcatt tttcattgtg gtttcctttt
    30601 tttaggtaat agaagccccg gcgggtttac gcctaaaatt ggttttttta ttacagtgga
    30661 agaattaagt ttttggggaa taaactcaca actgcgcgga gcttattcat tgctttaatc
    30721 agcctttctt tttcgtcagt tgtcagttca ttaaatttca ggtgatgacg ttccttatca
    30781 atatctgcta attcaaatat tgctgacagc acgcgcatat ttttatggta atcgtcatca
    30841 atcctgtccc gcatgtcgtc aataaagcgg cacatctcct tttcactgtt tgttttgaag
    30901 tgtttccctc gtagcatggc tatgtggttt agcccgtctg ttctttccgc gatactcagc
    30961 ggaatggcgc gagcgggttc ggtattagcc atgacgctac gccgcaatac ccatgaggcg
    31021 ggaaaaccag cggcgctttt gcttagacgc tggtatgtaa ggcttttggc tccagggtgc
    31081 aaaatagacc tgattaacgg acggcttaac gcgctggcca tttggcagtt ccagccagcc
    31141 tttaccctga ttagggatta ctggtgatgg tgactgagaa gttaatagac gagcaatgga
    31201 aatcatatta tcgcctcgct gtgtaaaggt tatcgatata accggtggct aatgccagtg
    31261 catcaaataa accgtaagac tgccctgcct gactaacacg atatcgggta atcgggtttg
    31321 atatcgttcg cgggcatttg ataattgaga aaccccgata tacgtttgtg tgcttactta
    31381 attgtgtgat tgcatattgg tggcctgact ttttattctc catgtcaccc ctttatattt
    31441 cactgctggt aatggcatcg cgcagcatgg caacgagatt cacctctact ttctcgtttg
    31501 ctttttcttt tggccggata atgatttttc cgctttttac catgccccga caggtttcaa
    31561 aggggatacc ggttaattct gagtatttcc tgagagaaac atacggcgtc gggacgttga
    31621 tattgatggt tagtccttta ctcattacgc ctatccttca gcattaaacg attccagacc
    31681 ccggagaaaa accagtctcg ccatgctgga gagggaacgg ctttcttttt cagccaacgc
    31741 ggccagcctg gcgcgttcat cttcggaaag cctcatggga gtagggctgc gtgatgcaat
    31801 cccccgcggc agacgcgacc gctgatcatg attttcttgt gtcataatgg tatgttgtga
    31861 tccactaagt tcctgttcaa cacaatctag tgaagaaaac ttcctatgtc aacatcgaaa
    31921 gaggaatttt tattccttat tggagagcgt ttgcgcgaag agcgggaaac gattggtaaa
    31981 agtcaaagtg cgattgccga agagctaggc acgacaacaa ggacttgggg caagtatgag
    32041 agaggggaaa ccgctccaga cggagtgact ctagctcttc tcagtgctcg gtatggtatg
    32101 gatgtttcgt atattcttac cggaaagcgg acgcctgatc tcggtgacat atctaacgat
    32161 gaattggaac tggtaaaaat ctatcgtgcc gcaccactgg ccgttaaagc cgctgcactg
    32221 gcagcattga cggcaggtag ttcggcatca gcagggacga taaacataac cggtagcggc
    32281 cagcgtgttg ctggcaggga ctatcacgaa aacaaaaaat aaataaggga acgctccagg
    32341 aatgagtgtt gagtctcatg gaaatgaaaa ccggctagcc gggcgggatt tttacgaaag
    32401 tagcatcaca gttgataaga tcaatatcgc tattccggcg gccaatgaag aaaaacgccc
    32461 actggttccc gcgcagcgta agcagttaaa ccaactggta aaagaaattg ctgacggcgg
    32521 ctatgaagag ggtttttcag tgtggcagcg cgtccatgct gaaattggcg tcaaaagcat
    32581 tgaggatatg acggtcaacc agtatcaaac ggcggtcagt tatcttcagg cattgcgcga
    32641 cagataccgg gaaaaggatg ccagtaatgc gctggttcat ctgctgttga agaataccca
    32701 gcaggtagat cagcggcaac aattaattca ttactgccat attcatttcg gtactggacg
    32761 attaactgag ctgacccgat cgcagctcca gcaggcgctt tcatggttgg atgatcgtca
    32821 gtgttcgaca gttcctgaac aaactgcacc taacgctcgc cagagctggc aggaggtgct
    32881 taaagcagaa ccattggttt tcagtgctgt gtttgttgct ggaataattc ttggcgctat
    32941 tttttttcgt tagacgtatc gataagtaac ataaaaaata tctcaactct aaagatagat
    33001 aaatcaaata gctatttata gaagggcttt ttatgacatt tgaagaatgg atttcaaaaa
    33061 acgagaaaga aatattcttt acttatatta atgctaataa tgaggcatct aacaatcacg
    33121 ttgccgatgc agtatataaa gataattatc ttcaagggta ttgcatcaac aagaaaggtt
    33181 ttagaacctt caagcttgaa agaatactgg atgtctactc ttcaaatgaa gaaatggttt
    33241 ctgccgctgg ccctttaact atcgtaggtc tcaagattga aaatcggcgt gcgaaagata
    33301 ctctccgtgg tttggagatt tgttttactg gttttgataa agacataaag gatgaactag
    33361 aatcactcgc tgaaaaaaaa ggattgttag tcagaaaagg tattacagca aaattatatt
    33421 tcctatgttg tggccctaat gctggatgga agaaaataaa acaggcaaat gaaaaaaact
    33481 gtttcatcct ttccaaagat caattttttt catttgttga cacaggcgag atcccaatag
    33541 aatcgacaga ggtttatgaa tctgacgaaa aagatataaa tgaaaaaata gaaaatttgc
    33601 acaatgaagt aacttcaaca tttcgaacta tcagagaacc gcgcaggagc accgcgctta
    33661 ttgctcgttt tgttgatggt tatgctattg gttggcgctt tgcaataaga gaatctcacc
    33721 gtaatgcact agatataaaa ttaactaaat ttgtttttaa taagcatcaa tatgaggatt
    33781 ggacgcaagg tagctctttt tctttcggta gaggtgatgt cttttatagt gataaattgg
    33841 gttatagtga gtggagtgag tttttaaaaa tacctgacgc ggttgtacta caagtcaaat
    33901 atgagtgttt ttctggttat gatccagttg caactattga tggttttttc tcaggggact
    33961 tcattccaga taaccagcta acgcctaaaa aactaaccaa tctaccaatt atgataagaa
    34021 gtgaaagtta tgaccctggg aaaataacac tggatatatt taagcctagt cttgatagaa
    34081 gtaaccttga cttgtttgat acgataaaaa taactcagga cgaacttatc tcattacttc
    34141 agtcaggcta ctactggaag aaggatgaag gacaaaaacc agtgcgtata aatttatttg
    34201 gtgataatta gaaatatttg tcaatattgt ttttagtaaa tgatttcccg gttggaaatg
    34261 tagttataag ttgactttga aattatcacc aaaggaaaat atcatggcag atgaaaaact
    34321 agattttttt aactataaaa ggaataaaga taaattactt attaacctta tcaatatcat
    34381 tgagggcata aactgtgatg gtcatataga tgagaaagaa gttttgtttc ttgatacatg
    34441 gataaaagat gctgatttaa tcagtaaaaa ctattgtgtg cggatgattt caaatagact
    34501 ttccgatata ttgtctgatg gcgttattga gccgtatgaa ttgaattatt tgaaagctga
    34561 tttaatcaag gtgcaaaaag agctgtctga tttacctgag cttgatttgt actctgatga
    34621 agcggacaag catttattgg aaggtctatg taaaggaatg atggcgaatc atgaacttaa
    34681 tgattcagaa ataagatact taaattggtg gctatcatct aatgcttcgc tcaaagttaa
    34741 ttaccctgga aaagagttat acgcattggt taaccggatt cttgccgatg ggatcattac
    34801 atcagaagaa cgtgatgaat tgaaaaaagc gttaatcgct tttaccggaa gtgatgtcga
    34861 ttccggtgta gtggatgggc tggcaactcg cttaccagtg gatgatatag agagcttagt
    34921 tctttccaat gcaacagttt gtctgacagg tgaattcctt tatggaaaaa gatcagtgtg
    34981 taaaaaactg attgaagatg caggcgggaa ggtgattgat aatataacag caaaacttga
    35041 ttttcttatt attggtacat tgagttgtaa acattggaga tatcaggctc acggtcggaa
    35101 aatcgaaaaa gcaatagact accgggataa tcgtggcatt ccactgaaaa taatcagtga
    35161 agaacaatgg cagagcttta ctggataatg ttacatggct gtaagcaaac ttccatccgg
    35221 caaatggctt tgccaatgct tcccctatgg gcgtgatggt cagcgcgttc gtaaacaatt
    35281 tgctactagg ggtgaggctc tcgcgtatga gcgccgcctg atggcggaga aaaaagggat
    35341 atcgaccgaa accaacagta caactctgca agacctgatc cagcgctggt atgacatgca
    35401 cggccagacg ctggagtcag gtgaagaccg ctacgctaaa ctgatggcaa tctgtgttcg
    35461 gctgggtaat ccctttgcgg tagacgttga taaaaatatg ttcgctgttt accgcgaacg
    35521 ccggttaaaa ggtgaatgga acccaaaagg gaagacggcc atcaaagagg ccacagttaa
    35581 ccgcgaatat tcctacctgc gggcggtgtt ctctgagctg aagcgcatgg gggagtggga
    35641 aaaagaaaac ccgctggacg gcatacgcca gtttaaggaa ggcgatcaag aactggcttt
    35701 tctgtacccg gatgaaatta agcgcctgct tgctgcctgc gatgaatcag agaataaaga
    35761 tctcggtatc atcgttcgtt tgtgtctggc gacgggggcg aggtggggtg aggcccagac
    35821 cctgaaacaa tcgcaaatcc ttcccggcag gatcacattc gtcaaaacca aagggaagaa
    35881 aaaccgaacc attcctattt ctgaaagaat gcacgccttg ttgcccaagc ggcgcggcca
    35941 actcttcaaa ccagcgtatg aggcatttaa gcacgcctta aagaaagcgc acattgaatt
    36001 accagaaggg cagttgaccc acgttctcag acacagcttt gccagccact tcatgatgcg
    36061 cggcggcaat attctggtgt tgcagcagat actgggccat agctctatca cgatgaccat
    36121 gcgctatgcg catttcgcgc cggatcatct ggatgcggcc gtgacgttca atccgtttga
    36181 taatctctaa tttatgctta aggaaatttt atgaggtatg ctctttatta tccaagtata
    36241 gagtttcgtg acacagagtt tttaaaaaaa tcattactga tatgggataa agtatttcgg
    36301 attgttcccc ataactataa gcctcaagac aatcctggta ttttgttggc aagtcaggaa
    36361 gagtttgttt tagatattaa tgttgatgag aaagataaaa gaagtactgc agatggtttt
    36421 ttacgctttt ataataggat agagtcaagt gaaacagggt tagtatggcc tgctggtttg
    36481 gactcggaaa gttttgttcg cattaatcct gaaaagattg aagcaaggtt actacctctt
    36541 tttgaggaat tgaatagaca atatacatgt aatgggttca tgacgatacc agctccgcta
    36601 gctggtggtt atatgtttta tttggcaaat agcgttgcga agagccgaga tttacattta
    36661 ttaacagact ctccagatac atgggctgtt gggacgtatt tttctcagaa tggtaatttt
    36721 gatgagttta tttataatga aagtagcgat gtatatatgt gccaatgttc tgttaatggg
    36781 gtaatgccca gtaatttgag cgatatacca atggacaaac tatttaggtt tattgaggaa
    36841 catcatgatg agaaagaaaa ttttagaatt gagttggaga gattaagggg ggaaatcgct
    36901 aggtgcaata ataaaaaaca tgctgaatat atagccaatg attttgtatc taacttaaat
    36961 cgagctaaaa gagaatataa agattctctt cgtaagctta accggaggaa tctatataac
    37021 atttttactt ttggagtacc tgcaacagca agcgttctgt ctctggggat tggggggagt
    37081 atttgggatc cactatcgat agcttctggg gtgacaatag gggctatagc atcttttttt
    37141 tcaagacaga tgatccccag agataaagga accccttcgt atctagtctc gttagaaagc
    37201 atgtcatctg aaccaaccgg ccaattaaat agaattttta atgaattcat taatgattag
    37261 aataattaaa ctatttttag aaattcttaa ataactcgca ggtaagctag tggcagcaag
    37321 gacgcacatt taccctcatt aacgcatata gaccacatgt agccttatga tttgtaataa
    37381 catcatgatt ttaaaagtgt catataactt tttaaaatcc ctcggcgttc gcgctgtgcg
    37441 ggttcaagtc ccgctctggg taccatgcgt taacgccttg taatataaga aaataattaa
    37501 aagaatatga ccgccacgag gcggtttttt tgtgcctgta atttggcaag tggcgacaaa
    37561 atggcggcag agtggcgaca gcgcttttcg cgggcgttga taatgacggt tttataagcc
    37621 gtaataagac cgaatttgaa aaaagtttta ttcatgaatt gtgattaaaa agtcagggcg
    37681 gtttgtccgt ttgctttcgg atgctgtggt acggagttaa gttagttcca atacgataga
    37741 aaatgctgtg gtgttatgcc ccaattgcca ccgtgctttg cattatgccg tgaataaaga
    37801 tgtgctgcgc gaagggatgt atcaggcgct ttcacggcta attaaggaat agccatcatg
    37861 tttagttggt tcaaaccaaa gcagaataac tgcgagcagg tagttgatag gcttcgtcag
    37921 attgaaacgg tttttgcgcc agaaggatgg gagcgacacg cagaaatcgc tgttggcgga
    37981 ttgagtgaaa tcggcttctc aaaagtgact catcacctgt tagttgtttc atccaatggt
    38041 cgcggggttg tcgactgcca gacaggggag cgtgtagcca gagattatga agtatatggc
    38101 tcctggtacg actcgctgaa tatgacttgc cttggcattg gcccgcttga tggtgagctg
    38161 atctccattg ctgggttatg cggtggtgga ttgccagtat acaaccgcta tggggagaga
    38221 ctggaagtcg ctgcaccaga atggcctgat gaagacgttt atttttgccc gccgaataag
    38281 tcagcgttta ttaacggcca tcaagctggg tgctgccgta tcttccgcga ccagattctc
    38341 agtatgggct tttcctggaa tggggagttt atggcggtcg caacatccag cgatgtcact
    38401 gtttggcaac gacaaagccc ctgattcaag gtgcgtagat atgcaaaact ctaagcagcg
    38461 gcccgatagt tgtacgcgct atctgaagcc tatgcgatgt cagtgacagc ccaaatagtc
    38521 gcccccgttt ttcagataca aaaaaggtgg ctttcaatca accacctaat aatggagcat
    38581 tattacggtt ccttccgcgc ctgggccact tgagctgctg gtagagtcat gctgccattt
    38641 gcaacattac ttgttgcctg acactcgatg attgcatcca cctggtcggc acaggttgcc
    38701 agtgcggctt cagtttcatc cagcagggcg tttaattcac cgttggtttg tgggttggct
    38761 ggtgggaacc ggcagggagt cagtctggga caaccattca cggtaagcac ggccacctga
    38821 gagggcgggg cgctggcgca accggataat atcagcaggc agctcagaat cagcccagcg
    38881 tttaagcgct tcattttcat gttgtaatct cactatcatt ttttgcctct cggaaagagc
    38941 cacctgggtg tctgcggcca tatcgcgtaa acgtgcctgc tcaatgttgc tacgttcagc
    39001 ctgctcagac agcgctgtta actggctgga tttttcattc agtgctgttt gttgcaacga
    39061 cagtgtttgt gcttgctgct ctgtcaactg ccggttggtg tgcagccgcc aggactgcac
    39121 accgattcca gcgctaagta gcattatgat ggcagcaatg atcatgctgc ttttcatgcc
    39181 agttctcctc ccgcttgctg ataggcggta aggaggcgat ctatactatg ctcgcgttga
    39241 ccatagcccg ctcccggtaa tgaagcccat atattgctac atcgagtaat ggcgctggcg
    39301 atctgaccct gtgagatgtc ttccagtgcc cgctgttccc ggattagctg aatagctagc
    39361 gtgtcttgtg aatcgggccc gaaatccggt agttttaaca gcgctttgta tgtcggccaa
    39421 tagcggtaga gctgttgata gcgcccagcg gcagtcgagc gttgtccttg cttgttgaag
    39481 atttttcccg ggcggccgtt agcaaagggg tgatcatggt agtcggtgaa gatctctggc
    39541 ttaccatcaa tgccggtaac aatgacatcg tagccacgat tacgggtaag tgggtgcgtt
    39601 gccgtccctt cggaaaatgc caacatatcc agaaaggcag ttagattggg ggagttagtg
    39661 ggcat
//
