# Supplementary material for: May the Phage be With You? Prophage-Like Elements in the Genomes of Soft Rot Pectobacteriaceae: Pectobacterium spp. and Dickeya spp
Source: Front Microbiol. 2019 Feb 14;10:138. doi: 10.3389/fmicb.2019.00138 (PMC6385640; doi:10.3389/fmicb.2019.00138)
Supplement: Supplementary file 2 [file Data_Sheet_2.ZIP › Supplementary_prophagesGENBANK_files/Genbank FILES _SRP_prophages/phiPa1.gb]

LOCUS       Exported               78057 bp ds-DNA     linear   UNK 02-AUG-2018
DEFINITION  phiPa1.
ACCESSION   .
VERSION     .
KEYWORDS    .
SOURCE      phiPa1
  ORGANISM  phiPa1
REFERENCE   1  (bases 1 to 78057)
  AUTHORS   .
  TITLE     Direct Submission
  JOURNAL   Exported Aug 2, 2018 from SnapGene Viewer 4.2.3
            http://www.snapgene.com
FEATURES             Location/Qualifiers
     source          1..78057
                     /organism="prophage phiPa1"
                     /mol_type="genomic DNA"
                     /note="/genome_id=6666666.356859"
                     /note="/genome_md5="
                     /note="/project=robertczajkowski_6666666"
                     /db_xref="taxon:6666666"
     CDS             complement(105..389)
                     /codon_start=1
                     /product="Integration host factor beta subunit"
                     /label=Integration host factor beta subunit
                     /db_xref="SEED:fig|6666666.356859.peg.1"
                     /db_xref="GO:0003677"
                     /translation="MTKSELIERLAGQQSHIPAKVVEDAVKEMLEQMASTLAEGDRIEI
                     RGFGSFSLHYRAPRVGRNPKTGDKVELEGKYVPHFKPGKELRDRANIYG"
     CDS             complement(481..2154)
                     /codon_start=1
                     /product="SSU ribosomal protein S1p"
                     /label=SSU ribosomal protein S1p
                     /db_xref="SEED:fig|6666666.356859.peg.2"
                     /db_xref="GO:0003723"
                     /translation="MTESFAQLFEESLKEIETRPGSIVRGVVVSIDKDVVLVDAGLKSE
                     SAIPVEQFKNAQGELEIQVGDEVDVALDAIEDGFGETLLSREKAKRHEAWLTLEKAYEE
                     AATVTGIINGKVKGGFTVELNGIRAFLPGSLVDVRPVRDTLHLEGKELEFKVIKLDQKR
                     NNVVVSRRAVIESENSAERDQLLENLQEGMEVKGIVKNLTDYGAFVDLGGVDGLLHITD
                     MAWKRVKHPSEIVNVGDEITVKVLKFDRERTRVSLGLKQLGEDPWVAIAKRYPESTRLT
                     GRVTNLTDYGCFVEIEEGVEGLVHVSEMDWTNKNIHPSKVVNVGDVVEVMVLDIDEERR
                     RISLGLKQCKSNPWQLFAETHNKGDRVEGKIKSITDFGIFIGLDGGIDGLVHLSDISWN
                     VAGEEAVREYKKGDEIAAVVLQVDAERERISLGVKQLSEDPFNNYLSVNKKGAIVTGKV
                     TAVDAKGATVELADGVEGYLRASEASRDRIEDATLVLNVGDSVEAKYTGVDRKNRVVSL
                     SVRAKDEADEKDAIATVNNKPEENNFSSAMAEAFKAAKGE"
     CDS             complement(2271..2942)
                     /codon_start=1
                     /product="Cytidylate kinase (EC 2.7.4.25)"
                     /EC_number="2.7.4.25"
                     /label=Cytidylate kinase
                     /db_xref="SEED:fig|6666666.356859.peg.3"
                     /translation="MAPVVTVDGPSGVGKGTLCKALAEALQWNLLDSGAIYRVLALAAL
                     HHHVDISSEDALVPLASHLDVRFVAEDGQLKVILEGEDVSHEIRTEAVGNTASQAAAFP
                     RVREALLRRQRAFREAPGLIADGRDMGTVVFPDAPVKIFLDASAEERAQRRMLQLQGKG
                     FNVNFERLLSEIKERDDRDRSRPVAPLVPAADALVLDSTEMTIDEVIARALAYAREILA
                     S"
     CDS             complement(3172..4461)
                     /codon_start=1
                     /product="5-Enolpyruvylshikimate-3-phosphate synthase (EC 
                     2.5.1.19) # AroF"
                     /EC_number="2.5.1.19"
                     /label=5-Enolpyruvylshikimate-3-phosphate synthase
                     /db_xref="SEED:fig|6666666.356859.peg.4"
                     /translation="MQESLTLHPIKLINGTLNLPGSKSVSNRALLLAALSEGKTRLTNL
                     LDSDDVRHMLTALTALGVEYHLSSDRTVCEIIGLGGAFAASQPLELFLGNAGTAMRPLA
                     AALCLTDGDIVLTGEPRMKERPIGHLVDALRQGGAKIDYLEQENYPPLRLHGGFQGGEI
                     SVDGSVSSQFLTALLMTAPLAAQDTQISIQGDLVSKPYIDITLHMMKAFGIDVRHENYQ
                     HFFVAGRQQYRSPGDYLVEGDASSASYFLAAAAIKGGVVRVTGVGRNSVQGDIRFADVL
                     EKMGAIVRWGEDYIECERGELHAIDMDMNHIPDAAMTIATAALFAQGGTTTLRNIYNWR
                     VKETDRLAAMAIELRKVGAEVEEGNDYIRITPPAKLKAAEIGTYNDHRMAMCFSLVALS
                     DTPVTILDPKCTAKTFPDYFEQLARLSELA"
     CDS             complement(4544..5629)
                     /codon_start=1
                     /product="Phosphoserine aminotransferase (EC 2.6.1.52)"
                     /EC_number="2.6.1.52"
                     /label=Phosphoserine aminotransferase
                     /db_xref="SEED:fig|6666666.356859.peg.5"
                     /db_xref="GO:0004648"
                     /translation="MTQIFNFSAGPAMLPVEVLRRAEQELCNWNGLGTSVMEISHRSKE
                     FMQVAAESEQDLRDLLKIPSNYKVLFCHGGARAQFAAVPLNLLGERSTADYIDGGYWAH
                     SAINEAEKYCTPNVIDVKTRIDDLRGIKPMREWKLSDDAAFVHYCPNETIDGIAIEEEP
                     DFGDKIVVADYSSSILSRRIDVSRYGVIYAGAQKNIGPAGLTLVIVREDLLGKARRELP
                     SILDYQVLADNDSMFNTPPTFAWYLSGMVFKWLKEHGGLAEMEKRNQEKADLLYSAIDG
                     NDFYRNDVALANRSRMNVPFLLADSALDKVFLEESVAAGLHALKGHRVVGGMRASIYNA
                     MPLEGVKALTEFMADFVRRHG"
     CDS             6022..7785
                     /codon_start=1
                     /product="hypothetical protein"
                     /label=hypothetical protein
                     /db_xref="SEED:fig|6666666.356859.peg.6"
                     /translation="MTQTFIPGKDAALEDSIARFQQQLQDLGFNIEEASWLNPVPNVWS
                     VHIRDRDCPLCFTNGKGASKKAALASALGEYFERLSTNYFFADFYLGKTIANGDFVHYP
                     NEKWFPIPEDDALPEGILDARLHQFYDPEQELSASDLIDLQSGNADRGICALPFTRQSD
                     QQTVYIPMNIIGNLYVSNGMSAGNTANEARVQGLSEVFERSIKNRIIAESISLPEIPQD
                     VLNRYPGVVEAIATLEKEGFPIFSYDASLGGKYPVICVVLFNPANGTCFASFGAHPDFG
                     VALERTVTELLQGRGLKDLDVFTPPTFDDEEVGEHANLETHFIDSSGLISWDMFKKQAD
                     YEFADWSFKGSTEEEFATLMAIFQQEDKEVYIADYEHLAVYACRIIVPGMSDIYPADDL
                     LLANNSMGAHLRDTLLALPDSKWKKEDYLALLQQLDDEGLDDFTRVRELLGIATGKDNG
                     WLTLRVGELKAMLGLAGGDLDQALIWTEWTQDFNDSVFTAQRSNYYRCLQTLLLLAQEP
                     ERDPAEYYDAFTKMYGSETVEAASAAVAGEACFYGLFAVDDTFTSLPAHQSLLAAYEKL
                     QQAKRRYWQAK"
     CDS             7950..8069
                     /codon_start=1
                     /product="hypothetical protein"
                     /label=hypothetical protein
                     /db_xref="SEED:fig|6666666.356859.peg.7"
                     /translation="MNGEFLIKLPRQGGTKILQNMIFINAKSVGLTYAIQLFL"
     CDS             8238..9098
                     /codon_start=1
                     /product="Formate efflux transporter (TC 2.A.44 family)"
                     /label=Formate efflux transporter
                     /db_xref="SEED:fig|6666666.356859.peg.8"
                     /db_xref="GO:0005215"
                     /db_xref="GO:0006810"
                     /db_xref="GO:0016020"
                     /translation="MKADNPFTLLLPAAMAKVAEDAGVYKATKQPCTTFYLAITAGVFI
                     SIAFVFYITATTGTATIPFGIAKLIGGICFSLGLMLVVVCGADLFTSTVLIVIAKASGR
                     ITWKQLACNWANVYVGNLIGALFFVGLIWFSGEHMVANGAWGLNVLQTAEHKLEHTFVE
                     ALCLGILANLLVCLAVWMSYSGRTLTDKMFAMILPVAMFVSSGFEHSIANMFMVPMGIV
                     IKNFAAPEFWNAIGMVPSQFEHLTVSHFITDNLIPVTLGNIIGGGVMVGLTYWVIYLRG
                     GDKHH"
     CDS             9156..11438
                     /codon_start=1
                     /product="Pyruvate formate-lyase (EC 2.3.1.54)"
                     /EC_number="2.3.1.54"
                     /label=Pyruvate formate-lyase
                     /db_xref="SEED:fig|6666666.356859.peg.9"
                     /db_xref="GO:0008861"
                     /translation="MTELNEKLANAWQGFSKGEWQDNVNVRDFIQKNYTPYEGDESFLA
                     GATKATSALWDSVMEGIKQENRTHAPVDFDTNVAATITSHDAGYINKGLEKIVGLQTDA
                     PLKRALIPFGGIKMVEGSCKVYGRELDPQLKKIFTEYRKTHNQGVFDVYTPDIMRCRKS
                     GVLTGLPDAYGRGRIIGDYRRVALYGIDYLMKDKFAQFTSLQSKLENGEDLEATIRLRE
                     EIADQHHALSQIKEMAAKYGCDISSPATTAQEAVQWTYFGYLAAVKSQNGAAMSFGRVS
                     TFLDIYLDRDLKAGKITEEEAQEMIDHLVMKLRMVRFLRTPEYDELFSGDPIWATESLA
                     GMGLDGRTLVSKTSFRFLNTLYTMGPSPEPNMTILWSEKLPQSFKNYAAKVSIDTSSLQ
                     YENDDLMRPDFNNDDYAIACCVSPMIVGKQMQFFGARANLAKTMLYAINGGVDEKLKMQ
                     VGPKSEPIKGDVLNFDEVMERMDHFMDWLAKQYVTSLNIIHYMHDKYSYEAALMALHDR
                     DVFRTMACGIAGLSVAADSLSAIKYAKVKPIRDEDGLAIDFDIEGEYPQFGNNDSRVDE
                     LACDLVERFMKKIQKLNTYRGATPTQSVLTITSNVVYGKKTGNTPDGRRAGAPFGPGAN
                     PMHGRDQKGAVASLTSVAKLPFAYAKDGISYTFSIVPNALGKDDNVRKANLAGLMDGYF
                     HHEASIEGGQHLNVNVMNREMLLDAMENPEKYPQLTIRVSGYAVRFNSLTKEQQQDVIT
                     RTFTQSI"
     CDS             11905..12066
                     /codon_start=1
                     /product="hypothetical protein"
                     /label=hypothetical protein
                     /db_xref="SEED:fig|6666666.356859.peg.10"
                     /translation="MPLLDYIKKYYNGNQASFARLTGVQPAQVTQWLEKGFIVVDHTLY
                     SPRRKLGI"
     CDS             12179..12301
                     /codon_start=1
                     /product="hypothetical protein"
                     /label=hypothetical protein
                     /db_xref="SEED:fig|6666666.356859.peg.11"
                     /translation="MQTLPTTLSPCKPRPHWISRISAKITTSKFVHKKSDENRK"
     CDS             12315..12503
                     /codon_start=1
                     /product="hypothetical protein"
                     /label=hypothetical protein
                     /db_xref="SEED:fig|6666666.356859.peg.12"
                     /translation="MHYSIHHAGVMRLILQNAAKPCVPCKSAQTPEPQPPRGLAVWFAP
                     DFFCKIFMIQIVQAGAV"
     CDS             complement(12670..14340)
                     /codon_start=1
                     /product="hypothetical protein"
                     /label=hypothetical protein
                     /db_xref="SEED:fig|6666666.356859.peg.13"
                     /translation="MKPIIALRLAGDDIPVSGLNLVLELNKCGLGFVTALTDRDVTGEL
                     VRLDLGYNTSVYRWFTGFVERCAPAENGAQRLFIRELVGVFERHWPISLQHPTLRDVIK
                     QLESSTSMRFSLPAARYVDTPIPHFTHSGSGYLLLANLGRAFAIPDYTWFQLPDGEVYV
                     GSYADSRFADSPVDVPNEFSTAGGAGNTQTLPVIPAIRPGVIVNSRRITKVAIDNDEMS
                     LTWTPLNASGKPAQKPPAQRQIEQHYPELSAGLHLPRLARVMSTNDSAALGDQSDPFRP
                     RYAVNLQLMDENGNPAADTPEYHAVPLPVPMAGAEGGMFQYPPAGSVVEIGFAEGRPDK
                     PVIRQTMQDGMALPDIKPGEQLQQQRAGVSQRVTTDGSWQRETDQTIQERSSQRHVTSD
                     AETRTTTTRTTTVNGTDTTTVLGTHKLLAGAVVALADGDYAIGTSANMLIRSSKDRNDY
                     VGQNYHSEVAGALTERIAGIRRSVAAQQELIAPSIRLGNDQLNVLTLLTDTLDVLHTLA
                     QQTANHTHNNTGTPLNAEAINGTGQRATALSEKYGPFIA"
     CDS             complement(14337..14900)
                     /codon_start=1
                     /product="Phage protein"
                     /label=Phage protein
                     /db_xref="SEED:fig|6666666.356859.peg.14"
                     /translation="MNQIIVLALDGEAILLKNILVSPSMQIQDKDQSGQASSTASAEQG
                     IKGKELRVSGLIPFAEKTQLTRLFALAEAKSADGSMKRYRVANEVAQAIKFREATFSGA
                     IDAAPQTDKMAWLVNFTLKEFFSVAERKAAQASAKGGAGTSAGATAQTASGTGNADEGE
                     EKLSWFESVLKKIDNKIGPAGEQT"
     CDS             complement(14897..15598)
                     /codon_start=1
                     /product="Phage protein"
                     /label=Phage protein
                     /db_xref="SEED:fig|6666666.356859.peg.15"
                     /translation="MWHEKRLAIPANMRPITCSTVVVHPWTFGVGQTVESGVFLSPPNA
                     VNTLAGKLAGTPANHDVVIFMITAPTIEQFITLLTAAAAVFPLPDLTQVQRRARSALSL
                     AVTKMQRPMMAGSLPAAVPLSFSTARSASTAQAMQQAIGQASGAGMADIADALAGFAAQ
                     RQTLLAAAGETLQQLQGMSVPIWALEVSGSVETALLDMREDIPNPDAVLTLCMMFVGED
                     LGPLREMVTER"
     CDS             complement(15599..16213)
                     /codon_start=1
                     /product="Tail fiber assembly protein"
                     /label=Tail fiber assembly protein
                     /db_xref="SEED:fig|6666666.356859.peg.16"
                     /translation="MSNYSTQIKNAELNESGLAINAGWITVYHVNSATREYQSASYEYV
                     MQGVGLPADSYADEPELPPVGQALRRTDDGKAWEAVPDYRGQTVYSMNTRQAQIVTQFG
                     ELPDNVTLLKPATEFDVWNGKKWVIDKAAQAAAALKAAQLELATRKAAATSRINELTYA
                     IDLDIATDDEKTALTAWQKYAVLLSRIDVNAAKIDWPEAPQ"
     CDS             complement(16213..18168)
                     /codon_start=1
                     /product="alternative bacteriophage tail fiber C-terminus"
                     /label=alternative bacteriophage tail fiber C-terminus
                     /db_xref="SEED:fig|6666666.356859.peg.17"
                     /translation="MAQSIVTRAFEAWNVKKTLDGQPAVPDQIVFALIPNQDEDQAVSR
                     DEGMPDAAAIKHRAAITQSGVLNTNAVVYSVVLDTAIGDWDYNWIGLVDSQTQTVLMIV
                     HVRTQQKIKTQNGRQGNSLTRNLAMQFDGAAEATQINVSAQTWQIDFSARLYGMDDALR
                     VALLDYYGPAAFLGDGFNVSVAGTQAMVAPGVGYVGGLRAVLDAAEQLAVSANTGVWVD
                     VSRQGTVTGAWENRVTLRTAAELADYTDENGYAHYIAKVATITAGQVVDNRMASPVYLL
                     DKRFLQIDAAAEKYAPLKSPKLIGAPTAPTASQLTSNSQIATTEFVKAAILALVNDSPA
                     DLDTLKSLAEAVNNDPDFSKKVLSALTGKLEKDKNGSDINDVGVFLSNIGAVSLNTFQV
                     ITGKKLLSADDDVLTIKPTANGQRAYIQFNNAQSTEAIAFVGMRYGNNEQALTFEHRSG
                     SSIRLVDGEVSLHGLPRVTTAAQGTNTTQIASTEFVQSAINDGAGIPLPWPQAVAPTGW
                     MKCAGQSFNKSEYPKLSLAYPSGVLPDLRGEFIRGWDDARGIDAARVLLSAQGDAIRNI
                     TGEIWTTAQNLQFLGENLQSSGVFELLHEFGVGAIADGAGDSCPSRMRFDASRTVPTAS
                     ENRPRNIAFNYIVRAA"
     CDS             complement(18175..18807)
                     /codon_start=1
                     /product="Phage protein"
                     /label=Phage protein
                     /db_xref="SEED:fig|6666666.356859.peg.18"
                     /translation="MSEFKTWLDSQPLPPWMDKGEPIKLFTAVKQFWLKTYDWVQFPLR
                     QFDAETCDVALLDAMAYQRDIQRFNGEPLALYRKRVKFAFINAVDAGSVAGFINIFRRL
                     DIGDVTLAERQPAHDWDVILVQLDDEQLGTYNTLMMDLIRQYGRTCRRYHFDVTNADIS
                     RIRAAEFSHDAAFYAVDVDTVHGLVEGRTPTNAPAFTSSTEYYTASQ"
     CDS             complement(18800..19984)
                     /codon_start=1
                     /product="Putative bacteriophage protein"
                     /label=Putative bacteriophage protein
                     /db_xref="SEED:fig|6666666.356859.peg.19"
                     /translation="MSNRPNPDYERILAEQGMPVTDKQIRAEFDEVVADAGMITNTSRM
                     SPFWRLITAIVTAPVMWLKNALVNTVMKNLYLATASGAFVDVFAWAVNLERKGAAGARG
                     VILFTKSDPSITAVVPAGTQIQTERINGTVYRLTTDADFTIDAGISSALIPVTATGAGS
                     GHNLAPGYYRILSVGVDNIEQVVNDDDWLTAPGADVESDDELRDRVRNQFNLPGQYHID
                     AVYRGAIAQIAGLTTDRIFFQHDAPRGPGTANVFLLLDSGVASQPFIDTVNDYVMAQGH
                     HGHGDDVLCMPLPEFDVPLGVTVYLKNYENFTIQELQALRVNVLDLIRCAFRQNTDYDV
                     KKTWPYSRFSFSALAGECHQYFPVIESITFSESDIVSDLSIPRLSGVSVVFKNV"
     CDS             complement(19981..20310)
                     /codon_start=1
                     /product="Phage protein"
                     /label=Phage protein
                     /db_xref="SEED:fig|6666666.356859.peg.20"
                     /translation="MSDALYFDLLITDGDFTLNTGNEPQLCNNRVSIAQDVVHRLIESG
                     LVKQLVAERSPVLRSDIMLRMELLTEEDTRLVPGTVVIRDNGRGNYFIDAETYDFGPIS
                     VSEPL"
     CDS             complement(20307..22487)
                     /codon_start=1
                     /product="Phage protein"
                     /label=Phage protein
                     /db_xref="SEED:fig|6666666.356859.peg.21"
                     /translation="MRELGFLLSLKNQLSAPLGRAQQSVEQFANRSADALARVAVGAAG
                     LWGVAQGVKGLLDPANDVKKALDELSTRNVSTQSLDAVYQSAQAFSTAYGKSAAEFVAS
                     ATVIRSSIAGITDTELPRYTTGLNTLAVATKSSAEGAASYMNDMASNFSTVAKRMGNIP
                     FAEMMASKGAYMVQNFGTSLDEIKELVKSSKGTGTQMGVGMDEQFSVMGMLKQTKGTEA
                     GGIYDAFLKSAVEGGKQLGLSFTDAQGKMLQFPDILQKLQGKFGSSIEGNIKAQAALNK
                     AFGDGAQALTATWGQADKLRQHMRDMGNTQGLDRATEMAKKMADMWERLDKVWERIRVS
                     IGMRLIPAISPLGNTVIAIGEKFAKWLDMFPNIARWLGYVALSTLAFAAAGATANIVFG
                     ASRFIWTGLLPLWSLGTKSLALVTGQLNVMTSIGTKATTAMNWLRSSFIVTKVAAWAAA
                     IGVNAVIWPILAIIAAIALVVIAVVKFWHPIKAFFNGFISGFSEASGALAPLSPLFDLL
                     GAAIGIVWQGIKALFGSFSELLTPIAYSSEELAGVTSAGEMCGRIVAEAIGWILAPIGW
                     VVEACRVLDGVFADLWSSIQLGWEMAVNFFAGLSPVAAFGGFVDAIKNIFSGLWASLMD
                     SFTQTYNFIAQGLNYLPGINIDLKPTSGSTLAAPAGITAPPMQNGGISKTLQTNNQSTA
                     NTRKTEIASVNIYPPNGATFTSIAESQELAAG"
     CDS             complement(22490..22639)
                     /codon_start=1
                     /product="hypothetical protein"
                     /label=hypothetical protein
                     /db_xref="SEED:fig|6666666.356859.peg.22"
                     /translation="MTLRRHYLPHDDDDAMSLARAAWLAEYFHECQINSTAAGIAFAFN
                     GSRE"
     CDS             complement(22684..22956)
                     /codon_start=1
                     /product="Phage protein"
                     /label=Phage protein
                     /db_xref="SEED:fig|6666666.356859.peg.23"
                     /translation="MSKETNVITLTVNGRELSFSPTLVAYNKLSNEAARDGDVIGTIAT
                     YLKRIVTPDTRDTLNELLQSPGIGTQIAKKVNEIYAPEVEIEVKG"
     CDS             complement(23071..23445)
                     /codon_start=1
                     /product="hypothetical protein"
                     /label=hypothetical protein
                     /db_xref="SEED:fig|6666666.356859.peg.24"
                     /translation="MKQLLAFVVAAFLAGWYVNDLQHDSTELSITRAATAAANGVRTSL
                     EDIAGQSGRVLEEKLQELRANEHTQDRVFHTETLKPIFLNVCASDEYVRLFNDSAEQAE
                     RALSGKFANPLSGATPPPGG"
     CDS             complement(23445..23786)
                     /codon_start=1
                     /product="Phage protein"
                     /label=Phage protein
                     /db_xref="SEED:fig|6666666.356859.peg.25"
                     /translation="MSLSAKQATFTVMVARLITWAAENGYSLTFGEAYRTAEQAAINAK
                     SGAGISNSLHTQRLAVDFNLFVDGVYQSRTEAYTPLGEFWESIGGAWGGRFTSRPDGNH
                     FSLAHGGVR"
     CDS             complement(23783..24070)
                     /codon_start=1
                     /product="Phage holin # possibly family II"
                     /label=Phage holin # possibly family II
                     /db_xref="SEED:fig|6666666.356859.peg.26"
                     /translation="MPNGETSFFANLLLVGAAIGLGKLLVSEERITFRLLVGRIILGSA
                     ASMVAGVALIQFPELPELAVLGLASALGIAGSTAIEAIIERKLRASRGNS"
     CDS             complement(24074..24529)
                     /codon_start=1
                     /product="Phage tail assembly"
                     /label=Phage tail assembly
                     /db_xref="SEED:fig|6666666.356859.peg.27"
                     /translation="MTQRIGGQSFDISLGTELVHVKTATLDITDNTAVSQTRGIPDGFV
                     AGDVGAEGEMEFDTKNFKKITALARVAGSYRAIPTSDILFYANTGDEEFKVEAFGCKLV
                     LTGPVAFDPKGGETATHKVKYLVTSPDFVRIDGVPVLSETDIRDLIG"
     CDS             complement(24532..25671)
                     /codon_start=1
                     /product="Conserved hypothetical phage protein"
                     /label=Conserved hypothetical phage protein
                     /db_xref="SEED:fig|6666666.356859.peg.28"
                     /translation="MTWPTITINQLNQLQGETKEIERVVLFVGRAVGDAIPVTPVNTQS
                     NLDSLLGAEDSTLKRCVEAARLNAGQNWSAFVVSISDDELDEQPAAEVAKIWAQRVENA
                     QAVASVEGVVVTLEATKSTIAAAASLRTTLISKYGRWVWFILSVSGLQAGESWTVYLAR
                     LADLQRGDAVPSVQLVPNLWGSEAGVLAGRLCSRAVTVADSPARVRTGPLIGMGTVLPV
                     DSDDMPLGLATLQALEAIRYSVPMWYPDYDGIYWADGRTLDVEGGDYQVIEHLRIVDKI
                     ARRVRLQAIAKIADRSMNSTPGSIAAHQTFFARHMREMSRSSQINNVTFPGEVQSPREG
                     DVVIAWTSSVAVAVYLTVRPYGSPKSITVGIMLDATLEA"
     CDS             complement(25673..26323)
                     /codon_start=1
                     /product="hypothetical protein"
                     /label=hypothetical protein
                     /db_xref="SEED:fig|6666666.356859.peg.29"
                     /translation="MELASLELPPKKRQRLLWRIAKLGVIVAAKRNQRNQTSPDGQPWA
                     PRKRGKGKMLRQLPKLLHVREMPQIDAVRIYLQGGQYKNGQVPVSAGLIGAVHQGGASF
                     SMSADRAPRPDQRNRPALPRQAKKLRALGYKMRKGNRYVKASSKYILDTLSMAQAGLLI
                     KKLRGEPTKTTWKIDIPSRVFLGVSDDEFNKILARQLQAIGFGWDVNAQDSGG"
     CDS             26491..27720
                     /codon_start=1
                     /product="Phage integrase"
                     /label=Phage integrase
                     /db_xref="SEED:fig|6666666.356859.peg.30"
                     /translation="MAKIAKKLTDTEIKSTKPADKELNLFDGDGLILRIAPLTKGGKKN
                     WYFRYAVPVSKKRTKMSLGTYPHLTLARARALRDAYLSLLANGIDPQVHNSDKANALKN
                     ATEHTLQAVARKWLDEKVKTSGISQDHAEDIWRSLERNIFPGLGNVPVNEIRPKLLKQH
                     LDPIEQRGVLETLRRIISRLNEIFRYAATEELIEFNPADNLGQRFSKPKKQNMPALPPS
                     ELPRFLVALNNASIRLETRLLIEWQLLTWVRPGEAVRTRWTDIDIETSMWNIPSDFMKM
                     KKPHKVPLSKEALRILDSMKAISGHREWVFPSIKAPLNHMHEQTANAAIIRMGFGGELV
                     AHGMRSIARTAAEESGKFRTEVLEAALAHSKKDEIIAAYNRAEYLADRAILMQWWSDYV
                     QAQRLKAIAA"
     CDS             complement(27842..28522)
                     /codon_start=1
                     /product="hypothetical protein"
                     /label=hypothetical protein
                     /db_xref="SEED:fig|6666666.356859.peg.31"
                     /translation="MKHTNEFSGEDYKKSFLDDVEKNEKALAYALDIRKFEIDLYWKRA
                     SYFWTFIAATFAGFITLQASSSVNKTDLSVILCCLGIIFSTGWLCVNRGSKHWQENWEN
                     HVDMLEDSSIGPLYKVVLTRPMPKGFQEHCEHLLTGPTSFSVSKINQLISLFVTILWVV
                     LLFKSLPDIRFSSPFNPFYFTLVCITGLFCLLFLWRGKTYGKDYVHIAKIRSAKIKLKI
                     TQDD"
     CDS             complement(28820..30568)
                     /codon_start=1
                     /product="hypothetical protein"
                     /label=hypothetical protein
                     /db_xref="SEED:fig|6666666.356859.peg.32"
                     /translation="MTVANYNSLVQQTFCDNAIRSVVMIDDDFLTYSESIQALNREIQL
                     DAKKIDSSKRAATLESFFQAKNMICDIDNGSVNFDVDRIRKSDLIIVDYHLDNNAPDKT
                     LSLLQELKDSEHLNMVVIYTREDLETVWMEIASTLKGAADYNELIIERENELLQRYWED
                     TVLPNLSHNGDKALTRAETISYIKDRKCCRRVKTLIHGDAILVEQDDKNFIAEMIAEYA
                     VAKNNIIQSKITDNVILGDQDGVKWIQTGNIFVTLFHKVHNDHDDDGDRIWRKLNDSLI
                     EWNPSYYQIIKSEIQNAIESEALSFVNHLANDQFGQAGWLNEILRSNSPDIRRRNIDFV
                     FGNLSEELYQRLKKNRSLDDFIKTVFDSYSDDFASSGIPRTLEYCSSKMNLPATDEAYN
                     QMYHALNMNLSSKNFEDGHISTGTIFFDTDSDKWYLCVSAACDLVPTQGNEPHHHRLKP
                     HRIIKVLELFNASQNKALPYAEHSKYIYVMHKNIRKYLSVFEGEKAIPVVDYMVVLNHG
                     AAVDGAEKNVISAVFLSNMDGNVQNVPVSLKLKSQLRTGYAERYQAIASQYGARIGVDY
                     VSMMLP"
     CDS             complement(30570..33554)
                     /codon_start=1
                     /product="putative two-component system sensor histidine 
                     kinase, putative heat shock protein"
                     /label=putative two-component system sensor histidine
                     /db_xref="SEED:fig|6666666.356859.peg.33"
                     /translation="MQMRSLSFKARARTIEHLGKGQIADCPTAVSELWKNAYDAYARDV
                     ALYTIDGDYPCGALIDNGCGMSLQQIIDNWLVVGTESKTRKNTLEENERFGLSIRKTQG
                     EKGIGRLSAAFLSPVTFLVTKKIDNNYVALLIDWRLFENPYLSFDDVTVPFREFEKIDS
                     LSDVLSDLLIELKKNVYFPSKDEDEDEVRHFNHILTKSAWEKFSEDEKAVNEKSGFITT
                     QDKIINFCDQFKIDPNVFVPWEEILIKVEKIDGDKHGTALFLLELGRDLSLLTNAGDLA
                     KDNAELSDVEQSLVDTLRAFVNPYILDDLSFSYEIYTIKANGYHRQILKQSDVFSKSDF
                     DALEHTVVGCVDEKGWFRGRVKAFGEDKGEVVIPASISVNSDSGVGPFEIQIGTLEFLA
                     QNTSHTEREHTHFDLKAKKYAGLMVFRDNLRVLPYGRVDNDFFQIEERRSWNAGRYYWS
                     NRRIFGFISITQSNNKELKDKSGREGFIRNQAARELKTLVSDLLTSLADRFFGGKSEDR
                     KELLEQVKREKELRKSAQQQARKSTQKSFSEALKTQTPVLDASLEAVKKLKTKLDSSQN
                     KHDYNYIKEIDADLANLESLRTEIKTPTKPPKIGVYEERYRNYRDKYNEFSAYILEMKL
                     IVNKLDSELNKLEPSLVGKNHLDKNQGIINARLTKFSNNIDEKTNALLKKWGEEIKSDR
                     AIYYSKAISIVDSINNNTEIENVLNLLDSIYIETIDSLTFKYQSINKGLERLFEGVNLD
                     SAFSLSEEEREYFEDKAKSLNALAQLGISVEILSHELEEMDSMVTRGLNSLPSTAKEHP
                     GFTLALNAHRSLTQQIRFLSPLKISGYQSRQKITGKNIMDYILKFFGDRFERQRITIEF
                     GDDFKNISINDIPSRIYPVFTNIVNNAMYWVSLANNRLIKIDFVNSLVIIANSGPAIDT
                     DDVPRLFELFYSKRANGHGVGLYLCRENLAVAHHKIWYSEPDVDGNYLIKDGANFVIQF
                     NGVEY"
     CDS             complement(33535..34704)
                     /codon_start=1
                     /product="DNA-cytosine methyltransferase (EC 2.1.1.37)"
                     /EC_number="2.1.1.37"
                     /label=DNA-cytosine methyltransferase
                     /db_xref="SEED:fig|6666666.356859.peg.34"
                     /translation="MNKIKAIDLFSGAGGFSLAALDLGIEILAAIELDKDACDTYRKNL
                     IQKRENSIKLLNKDIMTISPDELMDSLQLKEKELDLIIGGPPCQGFSSHRIRNAGVNDP
                     RNELLIRYYDFVKIFQPKMFLVENVPGLLWEKHKDYLNNFKRLAANSGYNILGPLKLNA
                     KDYGVPQNRNRVFILGLRDDISISEGDWPPSPTHFKDKKPYWVNASEIFEKPTSSIIEK
                     ITAVLGQDVAQKLKFKNTLKENKSDPNNIHMNHADYMIERFSLTPINGSREDVDFRLPC
                     HSNGYVGHKDVYGRIRLSLPGPTITTGCFNPSKGRFLHPWDNHGITVRQAARFQTFPDD
                     YIFSGGIISQGKQVGNAVPVNLGKILLKSCVEIIINNSQRDDKNADEIS"
     CDS             complement(34856..35467)
                     /codon_start=1
                     /product="hypothetical protein"
                     /label=hypothetical protein
                     /db_xref="SEED:fig|6666666.356859.peg.35"
                     /translation="MDFHHFNLKLEEICCGNKKLFAFPKIYIDANNNLYYNSLDSVCLS
                     ESYITKKNYFYNNNEMLIDILKIKKEFKVHDLYLEFDEISLSLIKVPIYYSVDEYHFNE
                     LISDEFTLTMIKKLCKQKNEEALLVSIINYLKLFDLNKSIFIMQYISFYNMLTQHQLSI
                     IYIEYIRHLNKKNLFSTRNNEKLTQKAIFRYFSIKEIKLA"
     CDS             35588..36169
                     /codon_start=1
                     /product="hypothetical protein"
                     /label=hypothetical protein
                     /db_xref="SEED:fig|6666666.356859.peg.36"
                     /translation="MSNHRFYIVKICTPEFLVYIPEFLKIELSHNNICPSNFIPIFVVI
                     DRANKIDPIVCVTEAYALNKKKELQKAHQAEDPLFKFPILEKKLKLINEEEGCRLRIIL
                     LGEECEEELEELPEGKSTITIFDRILYSTCCFLLKIHKEINRNNSVILYLETSINYLKD
                     KFDKIASDKDEISNSLNSLDKISNSNKPNI"
     CDS             36384..36821
                     /codon_start=1
                     /product="hypothetical protein"
                     /label=hypothetical protein
                     /db_xref="SEED:fig|6666666.356859.peg.37"
                     /translation="MKESIYTDNIDLSKTSRRGGFNKSKIPSEAVRSYCVSVRLNVEEL
                     QLLNIKRGSYKKGEWLRMASLQKLPPVIPTINTKAWKALTDISQKLNRIAIHIDGKSKD
                     SQLTHTELFAVKRQLEELRHNLLRTDFWSIPREGYAEDQEG"
     CDS             36790..37995
                     /codon_start=1
                     /product="Mobilization protein BmgA"
                     /label=Mobilization protein BmgA
                     /db_xref="SEED:fig|6666666.356859.peg.38"
                     /translation="MKGMRKIKRGKSFAGVVQYALKPGAHHKSDPIVIGGNMLSGSALE
                     LISEFNGTKQLRPDVQKPVWHNSLRLPDGESLSNDQWVNIADEYMKMMGFSDTHLRCYV
                     LHNDEGQHIHIIASRIGIAGGKLYLGRNENLISTRIISELEIAHGLTVTKTALSITTKQ
                     QKRRKVSRNEQMLSERTGVPCPKKSLQQIIDKSLADSPDLLTFTKRLEEAEVGCKANIA
                     STGKMNGFSFEYTGIAFKASQLGKSYSWANLSNRLNYNPDHLEALRTGIETKEALPVPV
                     PVPVPVPVPVPVPVPVPVPVPVPVEQVASETVRSASIGEKIAEIELRLRKDRRNEIVEK
                     ILQKNAAKQQKHLRLSSWLPFLQRLIELLRSYGKSILHNNPARFSKVYATQHLSRKRKI
                     RL"
     CDS             38330..38491
                     /codon_start=1
                     /product="hypothetical protein"
                     /label=hypothetical protein
                     /db_xref="SEED:fig|6666666.356859.peg.39"
                     /translation="MAFLFQFVAFGLAWLAFSWTGSTLVSVITFFVSIIILIYKIKKTY
                     ADRVVFIR"
     CDS             38532..38918
                     /codon_start=1
                     /product="hypothetical protein"
                     /label=hypothetical protein
                     /db_xref="SEED:fig|6666666.356859.peg.40"
                     /translation="MNRFIKSSFFIIVFLLSGCSTSGNQNLKNETPQSLQSKIIKNKTT
                     KTELLTKLGEPDTRTTLDDGNEQWRYFMYNNQFNATTFIPVVGLFTGGSQTQSKTLEID
                     FKGEVVNKWTFSTDNNNTKTGVLN"
     CDS             39062..39250
                     /codon_start=1
                     /product="hypothetical protein"
                     /label=hypothetical protein
                     /db_xref="SEED:fig|6666666.356859.peg.41"
                     /translation="MKALNSSIPEKDLLRIDYVKKLSCTEEANNVYNCIVDASISHMKQ
                     TKPVKLVKADGVWKEVQ"
     CDS             complement(39300..39737)
                     /codon_start=1
                     /product="hypothetical protein"
                     /label=hypothetical protein
                     /db_xref="SEED:fig|6666666.356859.peg.42"
                     /translation="MQFMDKQNNLPMETLEEQLIIIIDKYISKRYQPHDKSFSYQLYLI
                     FVGYHLKYFYPKRIYSKSNRNIDNIMAMFSSVYKSLTSNLLQRLNNKEGVIRELNSLVN
                     YIDNNQEKAEEIYAIVRAQYEVKVIENELTHEAVRIRTVRL"
     CDS             complement(39823..40221)
                     /codon_start=1
                     /product="Transposase and inactivated derivatives"
                     /label=Transposase and inactivated derivatives
                     /db_xref="SEED:fig|6666666.356859.peg.43"
                     /translation="MARKFYDKEIKAIVKLIETWSKPDFTWDSLCVACKKILGKVPTRQ
                     ALSQHSEIVVAYRTRKRSGVVKRQNTKLPGSLSLAAKRIERLENDNSALKYENNNLLLM
                     IQRMHENAYRHNILASILEEEFPQRARK"
     CDS             complement(40231..41835)
                     /codon_start=1
                     /product="unknown"
                     /label=unknown
                     /db_xref="SEED:fig|6666666.356859.peg.44"
                     /translation="MKEIHDKMINNFIIANKAHAKNFGNFEWDNSSWGGGITFFSGIKV
                     RMGNKNKKLMNYNIAEFAKAYVWHECFHDLSVAFRVLRLFRMLEIAIVKTNKEVKVSSI
                     DHKVLDEVMTIVQENFAISTSYKIYLDLRVLCSFMSKNEMLPESITRWSYPFKAYDAYT
                     NSTMDSMGNLSNQKKLPDEKAIDFIGKIFSSNPANERDIFTSSIFALLLCAPSRISEIM
                     LLEEDCEVIVEDSNGTSRYGLRFLSLKGFGYNTKWIPDCMVSVASKAIMRLKKLTRNAR
                     VVSRLIKSGENNLYESLNKSAFDCLTIEDLHKLGFVINQLNISQENLKFLSKIKHGTVS
                     VKAFWIYIKRKNVNSDNINANLCSINYNLLDSIKGADIFTTIKASSKYFRADFRTDNMN
                     NIFHRNIHFNCDGPVSIFRSHQIRHLLNTIAQRSILSEIQIAQWSGRRSVKQNSVYDHM
                     SHNELSELSRKLLNRNTYEETNITESSFNEQSIIMNLIKDKFEKLELKIQNSDPRKRKY
                     ILEKIKDLRLEIEYILM"
     CDS             complement(41851..43176)
                     /codon_start=1
                     /product="Integrase"
                     /label=Integrase
                     /db_xref="SEED:fig|6666666.356859.peg.45"
                     /translation="MFQTLRKLQESQYSVFETKDGNFKVNFSYSKWKISESITLNIDSL
                     RMVISAYIPIKTTLAYFAINYSASYTKKMFYAVKHYIKACNTNDSLFSKDCIKYYYKVV
                     SSLDYTHAETVKYFFMKMSGLYPSLFSSEVIIFLENIKVKKSNANKSIKTHDYKKGPFS
                     DSQLKVIIDSVAIAYKEEKISLSNYLLTFLVAYSGRRPMQISQLEAGDLLAFNGEYFLN
                     IPRIKQRNGYRKEFRKLQIPEELFSQLTYLVEAVNSLVNDTLKIDLSEKQKRKLPIFIN
                     TYPFKKGCVELNMIESGGLKLNPYAITLKIRNTINRSINEYQAYLGCINSRRFRYSLGT
                     KVAQLGYSPSLIANFLDHSSINSVMSYIENTAENGKRINEAVNELMKPLANKFIEGKEL
                     QQELDSLKHLIEEYCGGSKTNSFDNTAISLVTNSIDDMINSI"
     CDS             complement(43127..44395)
                     /codon_start=1
                     /product="putative site specific recombinase"
                     /label=putative site specific recombinase
                     /db_xref="SEED:fig|6666666.356859.peg.46"
                     /translation="MTLKYKIKRLKNKDSIRSCIIINESNGLPLVYPNLYMSVISRTNS
                     YSFSTMEAIANALLLFERYNADMNVGVFDMVNHDIEKLVSNRGYLFGLMNALSYRNDLE
                     NVTSILKEQHVSKRTLYFKIMTIENYVKWFFDNIAINNIDSSRYETISRAFDFIKPRIE
                     NGKNYNIESESKSLTNEQVTTLTDMVSVKSKINPFSEHVRFRNNLIIEILLETGIRGGE
                     LLNIKLVDFDYVHKSLCIVRRPDDQNEPRLRQPLVKTLERKIPLSIELTELIQNYISDF
                     RRKQCHAGEHDYLLVTHSSKGQLGHALTISGYQKIFEQIRKNSNVLSDIVGHSLRHTWN
                     VKFSEMILMNSNSQDYITYEKVRNYLMGWKKNSTTSDIYNQAFIAQESRKIMAVINPLK
                     NIVEDKSNVSNSKKATRKSIFGF"
     CDS             complement(44682..44996)
                     /codon_start=1
                     /product="hypothetical protein"
                     /label=hypothetical protein
                     /db_xref="SEED:fig|6666666.356859.peg.47"
                     /translation="MNIEEFMNEENHMCNLGEDLFGKIFEHGAIYDLPNSDFNKEIIYW
                     LSQYLVGNLRQPLDAISELDIFEQFYVYETWFSLIKCPDEIRNLSKRIIRYQIGLKTIL
                     "
     CDS             complement(45016..45222)
                     /codon_start=1
                     /product="FIG033266: Phage DNA binding protein"
                     /label=FIG033266: Phage DNA binding protein
                     /db_xref="SEED:fig|6666666.356859.peg.48"
                     /translation="MKNQATRLIRLPEVLERTGYGKAWIYRLINDGKFPAPVKIGSRAV
                     AFVESEIDTWIQSVIETSRNNVA"
     CDS             45362..45475
                     /codon_start=1
                     /product="hypothetical protein"
                     /label=hypothetical protein
                     /db_xref="SEED:fig|6666666.356859.peg.49"
                     /translation="MRVAEIPLFYGKWKNGRFKVKIAKKSIIYNDAFGFSF"
     CDS             complement(45500..46345)
                     /codon_start=1
                     /product="hypothetical protein"
                     /label=hypothetical protein
                     /db_xref="SEED:fig|6666666.356859.peg.50"
                     /translation="MNNWSPEHTKEIKAWLNIDNYRKFEDLSLIHFYHELWARNLFFKE
                     YREEFESRTLMSYFSKIFTGNPILIPEGQLGYMTPANKLFQPPHFFLTTLDRLAETSII
                     AMQRGGFVWHDGDNYSINAELREESLSDIMPDQFIRTVMFEIDLASGTDEEIAESLKAA
                     LPQWRKVKGIDENPLESVRFGYGTIKKLISYRVIPMLDILVWAAVKKIRVSDDRLSRLL
                     YTDDDEESEMRQSSQIKDTDRPLALKSCTTDFIRQFHYFMNKNSHLKQMKVSDVMKLSD
                     "
     CDS             complement(46693..47184)
                     /codon_start=1
                     /product="hypothetical protein"
                     /label=hypothetical protein
                     /db_xref="SEED:fig|6666666.356859.peg.51"
                     /translation="MSQIESLTAFLTQNLPERAMQQFESALDNAELIPAPKALGLEQRR
                     IGVFRYQAILNWGSFPYRICPPAQVYALVLAWLADSRNELYDELVLSPPSVDIEFDEEV
                     SSPLEIVVELADSINIRPSETGDIPFGGQRWELADPELWTALSGALYAADAHGAPLSES
                     "
     CDS             complement(47181..47654)
                     /codon_start=1
                     /product="phage head completion protein (GPL)"
                     /label=phage head completion protein
                     /db_xref="SEED:fig|6666666.356859.peg.52"
                     /translation="MAVPSLGFSGKPIDYQDEPIVNGVAFWPDLNLAEFQRSRTIPPDL
                     PASTAAQALLAAVAEVNDNLGDVVIYWRERGHEQAIDVPGARAGNENQLTAQYKKAIYA
                     RAKADLLGEFASIGRRETHPGQESAETRDILLAEAAFVLRNMQRYPRVGVHLI"
     CDS             complement(47765..48469)
                     /codon_start=1
                     /product="Phage terminase, endonuclease subunit"
                     /label=Phage terminase, endonuclease subunit
                     /db_xref="SEED:fig|6666666.356859.peg.53"
                     /translation="MAMSPCQRHRASVKAAKALDNREALAASPVSFHLQKLELEKDVAI
                     LRSLPRTEDRIEMKRDVLLPRWMPSVEAYLAGDARFANPALAYCVIWLFDTGEMGKALD
                     WADAAISESQATPDNFKSTLPAFVADTVLEWATGEAAAGHSIEPYFSRTFNNVRDKWRL
                     HEDINAKWFKFAGLYLLRDENGQPRATAVDDVDTLEQADALLEQAEKFNRHAGVGTIRK
                     KITARIRGLTEK"
     CDS             complement(48472..49479)
                     /codon_start=1
                     /product="Phage major capsid protein #Fam0066"
                     /label=Phage major capsid protein #Fam0066
                     /db_xref="SEED:fig|6666666.356859.peg.54"
                     /translation="MQLTPKAEALLRKYAAGLATANGQVDTSRFFSLTNPKETQLRSAL
                     LQSSEFLSLLPNVLDVNQVTGQVVTTGKPGIYTGRKKDGRFSRPLSVGGNEYKLVETDS
                     GSYLPYSLLVVWANAGSEDEFFQRIQAFSNESFALDMLRVAFNGTSVADDTDPDANPNG
                     EDVNIGWHQIVKTRSAEQIIVDDVTIGGAGADFIGLDAAVTDLVHNCIYEPFRNDPRLI
                     VLASADLIGNDATTMMNRIDRPTEKVAAQLIGRQIAGRTVYTPPFMPEGRLVVTTLDNL
                     HLYTQGGTRKRKAEWNDDRKRFENNYLRMEGYGVEHDELYAAFDKITLATGEGE"
     CDS             complement(49509..50567)
                     /codon_start=1
                     /product="Phage capsid scaffolding protein # Fam Scf032"
                     /label=Phage capsid scaffolding protein # Fam Scf032
                     /db_xref="SEED:fig|6666666.356859.peg.55"
                     /translation="MPQSHYRTDWLCIATSGQAVDGRTIEPQWLIDAAETYTRKTYTAM
                     IWPHHPQYDIGEREFTCNLGEVDALKVETEGDVTKLYAQLVPNQFLIDANRMGQKLFTS
                     AEFVSDFAGSGREYLFGLAVTDIPASLGTEKLKFVLAGEEKDAERGNLETFSLGKLQTP
                     DKKESFWSRLFSASKAFTPTPEPNTDKPDEGEEQKMEELKALLQQLLELVKNGKDAASG
                     DADAVDTPEQAAEAVADIAEEIAAAADEVAVLAQDVADNPEDEVKAAEFTVAKANLAKA
                     MKAFNVTPDKRPRSRSRRREFSARSKPANDAMGDLTTQLTTVLTKLSAMEDGGTRRPNS
                     APNGGNQPFEFV"
     CDS             50704..52554
                     /codon_start=1
                     /product="Phage terminase, ATPase subunit"
                     /label=Phage terminase, ATPase subunit
                     /db_xref="SEED:fig|6666666.356859.peg.56"
                     /translation="MIISSEYSRHNIRMAKYSDEIKDAARALYIKRWAPKDIAQELNLP
                     PRTIYHWAETGQWASLLPVEAVEHVIARRIDQLTGREKKTALELEELRDLIAHHVKLMA
                     QQNKHAEKMAEMQAKKAAYDGEGYCLSAASGEPGERKRRYKKNDVSSLTPEMLDTWAQE
                     HLFEYQLHCRDHKDEDWRFILKSRQIGMTYYFAWEAFEDAVVSGDNQVFFSASRAQSEI
                     FREYIVQIAQNHFGITLTGKNIRLSNGAILRFLSTNASTAQGFNGHLYGDEVFWIPKFT
                     RLHEVASAMATHNKFRTTYFSTPSAKTHQAYPVWTGDEWRGDDPKRKGIEFPKDSAMRE
                     GIICPDGIWRYVITMEDAIAGGLGALVDIDRLRNKYNPTAFAMLYMCQFVDSKDAVFKF
                     AALVGCEVDKAIWGDYDPTAARPFGNREVWAGFDPSRSGDNSTFVIIAPPIHDGERFRV
                     LAIWQWQGLNFSWQADQIKQLMRRFNITYIGIDTTGIGKGVYDLVSKFAPREATAILYS
                     VESKNRLVMKMIDVVERKRIEWAKDAIDETNKERAEIPASFMAIRRTTTNSGNALTFVA
                     ERSDATGHADVFFAISHAVINEPIDHEFDRPSTWAFGEAA"
     CDS             52551..53606
                     /codon_start=1
                     /product="Phage portal protein"
                     /label=Phage portal protein
                     /db_xref="SEED:fig|6666666.356859.peg.57"
                     /translation="MTKRQNKKFKAATGNNVETFTPGRGSVITFGEPEPILTTGTDYHN
                     IWYDNEYNHWRLPIDRLALSQLPNLNAQHGGVLYARRNMVASGYISGGLTADQVEQMAF
                     DYLLFGDVAILKIRNVFGEVIDLLPLPSLYLRCRKEGSFVILQEGPALIYEPEDIVFFK
                     MYDPRQQVYGLPDYIGGIHSALLNSEATIFRRRYYNNGAHMGFILYTSDPNLTLEMENE
                     IKTKIAESKGLGNFRNMFINIPKGNPEGVKILPVGEVSAKDEFANIKGITAQDIFTAHR
                     FPAGLAGIIPTNGAVMGNPDTARTTYRKDEVIPLQRKFMNGVNTDSEIPAHLHLQFNVE
                     TSPMTDDKGEK"
     CDS             53654..53929
                     /codon_start=1
                     /product="Phage protein"
                     /label=Phage protein
                     /db_xref="SEED:fig|6666666.356859.peg.58"
                     /translation="MVNMRIFKINCPECGSPAIIRKSDWKDKKLADLYCACTEVECGHT
                     FVFNASFSHTLSPSGLTGNKLVKFLIDQLKPDEKQFALNLLSGHGT"
     CDS             complement(54001..54411)
                     /codon_start=1
                     /product="hypothetical protein; Hypothetical gene"
                     /label=hypothetical protein
                     /db_xref="SEED:fig|6666666.356859.peg.59"
                     /translation="MISGTTVYGTLPEPGDIVWCYFPQVKGKPGPKPRPALVVKVAEED
                     NAVMVVYGTSQKTDKIFDTEFVLRCDDAGFAISGLAYDTKFDMSTLVTLPYTNEWFDIA
                     PMKGGQLPISPVMGTLHPTYILALKKASKKGS"
     CDS             complement(54421..54705)
                     /codon_start=1
                     /product="hypothetical protein"
                     /label=hypothetical protein
                     /db_xref="SEED:fig|6666666.356859.peg.60"
                     /translation="MTVNVVKKTGDFVLRLREKDSLSAISGRTLETLIDVTGMTKTELA
                     HLALRRLADALLPHYEKDDGALSIAQIQTIREFSTATDIPEERFTKSLL"
     CDS             complement(55035..57569)
                     /codon_start=1
                     /product="Phage replication protein # Replication gene A 
                     protein"
                     /label=Phage replication protein # Replication gene A
                     /db_xref="SEED:fig|6666666.356859.peg.61"
                     /translation="MSEQWAYPWNAPRPAISPYQGIAESFTSSVVNTPEPHPAVEQHLK
                     RLVSRAAFSDLDFEQAVARLDYFEPNSTLLTMRRQFAEAVRDEHQAALQNWMETPEGVE
                     ARLLEQPFFIRDTYRKKIEWLRANREPRHVSAFFMGTVKKALLRLDAVRAKQGVRDGFT
                     SELASYWRARWQHLAEFTKHEAINAGHAIAASITEMFETECGNTLPADMTNDEIQALFW
                     HLGYEMLALRVTPPCWGVIICDNESKKRICSAILRIISPDWWGRKLWRLRCEWRENQFR
                     AIGVIHKKRMPYVSIDALNQWQEQRRKNREFFKAHELVDEDGNVASLENMVYASVSNPV
                     IRRHELMTRMAGVEMVAISRSDEGVFLTITCPSRYHATIQSGHQNPKWDTSSPRQGQRY
                     LCKTWAKAMSKLNRRGLRPYGFRVAEPHHDATPHWHVLLFMPPEDRKEITEILREYFIA
                     VDRAELGRNTGARFKAKRLDPKKGSATAYVAKYISKNIDGYALDGERDNETGKPLRETA
                     RFAMAWASQHNIRQFQPFGLPPVTVWRELRKLANQLTAVQKEAGTFKRGAAQLGDPAMD
                     AVLASADAGCFATYIEKQGGVLIPRELYTVRIAYEDADEQNDYGETPEKIFGVFSPRLG
                     ELSRICTRLVKWKIRKKQVADAGTNDSAGRGLVVTSPTGDAWSSVNNSTGDEKISISEP
                     ADREIGSTSEPEITDFEHMTDTERRGLLNRLRSQPPDRRHKEHSSTTQPHKETEKQTVS
                     KRSDDWRTSVADFARSLGWDISAGELRRLETGNAITIAGYAYVASADGCLYQAPMKKQK
                     DTEYHDKAAALLQRIAVLCEATWSETTSQRYR"
     CDS             complement(57573..58574)
                     /codon_start=1
                     /product="Phage-related protein"
                     /label=Phage-related protein
                     /db_xref="SEED:fig|6666666.356859.peg.62"
                     /translation="MIDPRCFYDDTINVISVSGGKDSLAQWLLAVENGVSHIPAFADTG
                     HEHPQTMEYLDYLESKLGKIRRVHADFSRQIAGKRKFIAEKWPITLVSECGFTDEQAAN
                     IIATALDTLHPTGIPFLDLCMWKGRFPSTKRRFCSTELKHEPIRLQVVEPIIDAGFEVV
                     SWQGVRAEESASRALLSEWENGFDLGPRLSIYRPILHWKHADVFALARRHGVKPNPLYE
                     QGCSRVGCMPCIHARKSEIAEIFRRWPEEVERVARWERLVAACSRRQNSTFFPSTNDPK
                     KSERRIECISVESHGIHTYRDWALTTRGGATVRFIGRSRRSDGLQQRLRWGL"
     CDS             complement(58586..59488)
                     /codon_start=1
                     /product="Methyl-directed repair DNA adenine methylase (EC 
                     2.1.1.72)"
                     /EC_number="2.1.1.72"
                     /label=Methyl-directed repair DNA adenine methylase
                     /db_xref="SEED:fig|6666666.356859.peg.63"
                     /db_xref="GO:0009007"
                     /translation="MIRPFIKWAGGKTRVLPDLLPLLPKGDCLIEPFVGGASVFLNTDY
                     PSYVLADINPDLINLYQCAAYDTERLIATAHDLFNGGNNADAYNGNRLSFNYQKSNPST
                     VTAALFLYLNRHGFNGLCRYNNAGDFNIPFGKYRKPYFPEHEIRLFAEKANDTKTVFSV
                     ADFRKTLTIKGINKSTVIYCDPPYLPASDTANFTQYHHASFTHDHHRDLAAVLLSVNLS
                     RGVPVVISNSDTPATREIYQHYQFHEIAVQRSISASGITRGAAKEVIGVLKTCDGCGDE
                     SDSDVLPGYWESEENPIPL"
     CDS             complement(59485..59718)
                     /codon_start=1
                     /product="hypothetical protein"
                     /label=hypothetical protein
                     /db_xref="SEED:fig|6666666.356859.peg.64"
                     /translation="MRNSERKAMQVAGNDALVELLKKARQEEKKDQHLGFSLRLAALSI
                     HAQQKEFSTAEVIELLRKEAERFEHSSHEIIV"
     CDS             complement(59789..60151)
                     /codon_start=1
                     /product="Phage protein"
                     /label=Phage protein
                     /db_xref="SEED:fig|6666666.356859.peg.65"
                     /translation="MANTEAARAVPLSIAARTDGLNHIAMLRGKHFNTNSEKDMCRFID
                     DLRDERFYDGNRNDRKSTHSDNMRVLSAIFELADIDKGRHHLKFNELTTEEKAKLIKAM
                     NKLKAVVSLFPKHLIL"
     CDS             complement(60157..60357)
                     /codon_start=1
                     /product="hypothetical protein"
                     /label=hypothetical protein
                     /db_xref="SEED:fig|6666666.356859.peg.66"
                     /translation="MISTARLLKEKSPYPQENKGWLELPNGQRFQPTPAQAYFAPWSKK
                     PYMPAPKQKRRWFARLMGIAA"
     CDS             complement(60354..60554)
                     /codon_start=1
                     /product="hypothetical protein"
                     /label=hypothetical protein
                     /db_xref="SEED:fig|6666666.356859.peg.67"
                     /translation="MSGELIKVSEHTSVYRGFSITRCPRTATNPITRYRVSQGDQSFGM
                     FDALGQATSYINELHNMRNSA"
     CDS             complement(60551..60913)
                     /codon_start=1
                     /product="hypothetical protein"
                     /label=hypothetical protein
                     /db_xref="SEED:fig|6666666.356859.peg.68"
                     /translation="MQDEAKTIVDGEGDETADATPRRQIRLSEKPADLLSKEGFALYVG
                     KTTSAIVAMAKAGKLPAFYMADPLKPGGNAELWIHRLEWDKYAKQLVETAPPEWHGWKD
                     RISASKPTRRHRGMSA"
     CDS             61169..61321
                     /codon_start=1
                     /product="C protein"
                     /label=C protein
                     /db_xref="SEED:fig|6666666.356859.peg.69"
                     /translation="MVFFKHPRFRKYRDWFMFDETNPEAGQIAPALAHIGQDETKSHQS
                     DHKIG"
     CDS             61388..62374
                     /codon_start=1
                     /product="Phage integrase"
                     /label=Phage integrase
                     /db_xref="SEED:fig|6666666.356859.peg.70"
                     /translation="MSIKKLDDGRYEVDVRPQGAEGKRIRRKFNTKGEAQIFERHILVN
                     YHNKDWVEKPADRRKLTELLSLWWIYHGKSHNRGEIEKGRLNAIIVKLAEVGVIRADQL
                     TKKAILDYRVNRLNEGLKPSSVNRHHAILSGMFTKLIEADEYHSQHPFKDVKQLKEQQA
                     EMAFLTAGEIEDLLQLLDGDNRNAVLVCLATGGRWGEVANLKCEHIINNMLTFMKTKNG
                     KRRTIPISPALTTQIKHAKTGFVCHPNYDAVRNTLRAMKPDLPDGQALHVFRHTFATHF
                     MMNGGNIITLQRILGHSTIQQTMVYAHFAPDFLQDAVLLNPLNGVSI"
     CDS             62415..63212
                     /codon_start=1
                     /product="Pyruvate formate-lyase activating enzyme (EC 
                     1.97.1.4)"
                     /EC_number="1.97.1.4"
                     /label=Pyruvate formate-lyase activating enzyme
                     /db_xref="SEED:fig|6666666.356859.peg.71"
                     /db_xref="GO:0043365"
                     /translation="MNNSNTCFSTETPDVAEAVKSVIGRIHSFESCGTVDGPGIRFIIF
                     FQGCLMRCLYCHNRDTWDTHGGKEVTVEELMKEVVTYRHFMNASGGGVTASGGEAILQA
                     EFVRDWFRACKDEGINTCLDTNGFVRRYDPVIDELLDVSDLVMLDLKQMNDDIHQNLVG
                     VSNHRTLDFARYLAKRNQRTWIRYVVVPGWSDDDESTHKLGEFTKDMTNIEKIELLPYH
                     ELGKHKWVAMGEEYKLDGVKPPKADTMDRVKSILESYGHKVIY"
     CDS             complement(63323..64891)
                     /codon_start=1
                     /product="N-methylhydantoinase (ATP-hydrolyzing) (EC 
                     3.5.2.14)"
                     /EC_number="3.5.2.14"
                     /label=N-methylhydantoinase
                     /db_xref="SEED:fig|6666666.356859.peg.72"
                     /db_xref="GO:0047423"
                     /translation="MLHKNDYRLGIDVGGTNTDAAILDADLRCIATAKFPTSMDIYSGI
                     ERVIAAVLAQSGIEPQHICYAMLGTTQCTNAIVERKGLDRVGLLRLSLPSSDSVPPLFG
                     WDDEWQKTLGEHFYQLHGGYEFDGREIHPVLLNEVLAVCDKMRGHVDSVAICGVFSPVN
                     NDQELQVAQWVNAALPDVSLSLSHRIGSTGLLERENATILNASLQSTANRFVNGFIQAL
                     VRHGIKATPFFGQNDGTLMSESMVKQYPILTMACGPTNSIRGACHLSGLDNALIIDVGG
                     TTTDIGVLVNGFPRESAIAVEVGDVRTNFRMPDIISIGIGGGTCVRQSQNGTLTLGPDS
                     VGYRLLEQSVSFGGETLTLNDIMLQLQPERWTSSLSHPLPELDKALCLEAYRQMIDKVE
                     SAIDRIKSSSAAIPAVLVGGGSILLPDVLSGVSQVMRPQNFDAANAVGVALGKVGAQIE
                     RVVKMPDNDREKIKSELQQQTICLAEETGAMSGSVEIIDYQEIPLAYLPGNAVQVKIKA
                     AGNLA"
     CDS             complement(64902..66011)
                     /codon_start=1
                     /product="Conservative hypothetical protein probably 
                     involved in hydantoin, pyrimidine utilization # coupled to 
                     3.5.2.14 or similar function"
                     /label=Conservative hypothetical protein probably invo
                     /db_xref="SEED:fig|6666666.356859.peg.73"
                     /translation="MTRYIDSETIDDIALGASVLGTGGGGDPYLGSLIAKNALRNTQPI
                     VLMNLDDIEDDSLFVPCSTMGAPTVSVEKIISQRQIILAFDTMETVLAESASGTFSIEV
                     GGINSLIPFVVAAKKGLPVIDCDAMGRAFPEAQMVTFFLDGLSSAPNTLADEKGNSVIL
                     NPIDGVWSERLARAITEQMGAACAMCDYPLRGHELKRSAIKGTLTLAQNIGKTLREAHQ
                     SGSDPVQSLLTVLNGHVIASGKIIDVDRRTTGGFARGKVVLDGMGNDKGESFTVLFQNE
                     LLLAYRSSQTTNPTQDNLLAVVPDLISILDSETGRPIITEHLRYGQRVDIIAYPCNDKW
                     RTPKGIEVAGPEYFGYPVRYVPIEQLANR"
     CDS             complement(66064..67371)
                     /codon_start=1
                     /product="Cytosine/purine/uracil/thiamine/allantoin 
                     permease family protein"
                     /label=Cytosine/purine/uracil/thiamine/allantoin perme
                     /db_xref="SEED:fig|6666666.356859.peg.74"
                     /db_xref="GO:0015205"
                     /db_xref="GO:0016020"
                     /translation="MSQGNAVPEKQQQERQIYDYEYEPVPAEARKRWYVITLIWLAIGI
                     DISGLFLGTFLSGGLPFSQAVSATLIGSALLGVLAALCANVGYGCGLSTTLLSISVFGK
                     FGGKLIGIFSAVSLVGWFAFQLDFFGAMLQKALLHYHFEPGRFPILLFGMILMALTAIW
                     GVRSLGRLSMFSVPLMLILIVTGIYLAAVDHSTPPTITIKNPISMGSAISYVVSIWIVA
                     ASIMSPDIARYAKTRKDAILGAGLGFCFGNSATILVALLLTHLVGSDDLVEIFFSIGLG
                     MSAIVILIFAQWTTNSSNLISASLGLSVVIRALSRPTLVILMAFIGLFFAYNGMINNFT
                     QFLSLLGVIVSPIAGVYLAEYYFFDLSPSKIDISEPKNLNIGAAAAWICGSLVSLLTST
                     DFFNVLTISSISALDGIMVSMAVYVALRKIFPRVGM"
     CDS             67645..68586
                     /codon_start=1
                     /product="Transcriptional regulator"
                     /label=Transcriptional regulator
                     /db_xref="SEED:fig|6666666.356859.peg.75"
                     /translation="MRLDKLEIRWLKLFCKIVEKQGITNAQTVTGLSQPVLSHYLSRLE
                     DTLGLVLCERGRGGFALTTEGEVVYQEAKSVISTLDDFANRLARIKHQLIGKVKLGCLD
                     NIATHPNNVVSQAISHLYDQSPEVNVEIEIMEYLPLMERLKNGHLDVVLSALPDDIPAD
                     IFYQPVFVEHSYFYSLAENAEMIEREWLEGELNPRRLLIGGHAVNEISKQLGSVSKQGY
                     HQTAWHLEGSLLLLLAGTHIGFLPDHYAASWVEKGKLAAVAPDRLKLTSIFYLVRNAKQ
                     RLSPVAEALWNNMVDAGQSSLASLDTANSGSS"
     CDS             complement(68572..69726)
                     /codon_start=1
                     /product="Hypothetical MFS-type transporter protein YcaD"
                     /label=Hypothetical MFS-type transporter protein YcaD
                     /db_xref="SEED:fig|6666666.356859.peg.76"
                     /translation="MSAYSRPVLLLLCGLLLLTVCIAVLNTLVPLWLSYQSLPVWQVGL
                     VGSSYFGGNLVGTLLAGKLIKLYGFNRSYYFAALLFGIAIVGLGISADIGSWLFWRFLA
                     GIGCALIWVVVESALLCSGTSTQRGQLLAAYMIAYYLGSVIGQLLLGVLPTSLLSVLPW
                     MVALVTLAVLPLLCTHLPTPPEQHEKHVNMWKMLRYRSARLGIHGCIISGAILGSLYGL
                     MPLYLSHQGMNDAQVGYWMALLISSGIVGQWPVGRMADRYGRLLVLRVLVFVVIIGCVA
                     MLSISHYAMAPSLFLLGCAGFTLYPVAMSWACEKVRPEELVAMNQALLLSYTLGSLCGP
                     SVAAVLMQNYSDRLLFVLIAAVAMIYLMILLRKADHHPTPLAAA"
     CDS             complement(70041..71336)
                     /codon_start=1
                     /product="Seryl-tRNA synthetase (EC 6.1.1.11)"
                     /EC_number="6.1.1.11"
                     /label=Seryl-tRNA synthetase
                     /db_xref="SEED:fig|6666666.356859.peg.77"
                     /db_xref="GO:0004828"
                     /translation="MLDPNLLRNELDAVAEKLLARRGFKLDVETLRKQEERRKVLQVET
                     ESLQAERNSRSKEIGAAKARGEDIEPLRREVNTLGEKLDTAKAELDQLQNEIRDLALTI
                     PNLPDDSVPLGKDESQNKEVTRWGEPRKYDFAVRDHVELGEMAGGLDFAAAVKLTGARF
                     VVMKGQIARLHRALAQFMLDLHTQQHGYQEAYVPYLVNHATLYGTGQLPKFGEDLFHTN
                     PLSEEAESSQYALIPTAEVPLTNLVRDEILDEESLPLKMTAHTPCFRSEAGSYGRDTRG
                     LIRMHQFDKVELVQIVRPEDSMQALEELTTHAETVLQLLKLPYRKVLLCTGDMGFGSTK
                     TYDLEVWLPAQDTYREISSCSNMWDFQARRMQARCRSKSDKKTRLVHTLNGSGLAVGRT
                     LVAVLENYQQADGRIEIPEVLRPYMGGLEFIG"
     CDS             complement(71440..72783)
                     /codon_start=1
                     /product="FIG065221: Holliday junction DNA helicase"
                     /label=FIG065221: Holliday junction DNA helicase
                     /db_xref="SEED:fig|6666666.356859.peg.78"
                     /translation="MSNLSLDFSHNEFQPLAARMRPATLAQYIGQQHLLGAGKPLPRAI
                     EAGQLHSMILWGPPGTGKTTLAELIGHYGQADVERISAVTSGIKEIREAIERARQNRNA
                     GRRTILFVDEVHRFNKSQQDAFLPHIEDGTITFIGATTENPSFELNSALLSRARVYLLK
                     ALMAEDIEQVLLQAMSDSERGYGGQNIVLPAETGRMLAELVNGDARRALNSLEMMADMA
                     EIDAQGMRILTPALLNEIAGERSARFDNKGDRYYDLISALHKSVRGSAPDAALYWYARI
                     ITAGGDPLYVARRLLAIASEDVGNADPRAMQVAISAWDCFTRVGPAEGERAIAQAIVYL
                     ACAPKSNAVYSAFKAAMQDAREKPDYDVPEHLRNAPTRLMKEMGLGAEYRYAHNEPNAY
                     AAGESYFPSEMADTHYYAPTSRGLEGKIGEKLAWLATQDQNSPTKRYR"
     CDS             complement(72791..73465)
                     /codon_start=1
                     /product="Outer membrane lipoprotein carrier protein LolA"
                     /label=Outer membrane lipoprotein carrier protein LolA
                     /db_xref="SEED:fig|6666666.356859.peg.79"
                     /translation="MKRLTSLDEGALYLEIQRIMRMKKWLAISCLIAGVTSTAVYADAA
                     KDLQGRLNKVNSFHANFSQKVTSTDGAAVQEGEGELWLKRPNLFNWKTTSPDESALISD
                     GKTLWFYNPFVEQVTATWLKDATGNTPFILITRNDTSDWNKYDVRQKGDDFELTPKSAS
                     GNLKQFAINVTTNGTIKQFTATEQDGQRSTYVLKNQQNGAVDAAQFTFTPPKGVTLDDQ
                     RQ"
     CDS             complement(73615..77025)
                     /codon_start=1
                     /product="Cell division protein FtsK"
                     /label=Cell division protein FtsK
                     /db_xref="SEED:fig|6666666.356859.peg.80"
                     /translation="MSQEYTEDKDVTLKKLNGTRRLLEAILIVVALFAVYLSVALLSFS
                     PSDPSWSQTAWHEPIHNFGGVAGAWLADTLFFIFGVLAYAIPPIMLSLCWAAFRQRDNH
                     QSIEYFTFSLRLIGTLALILTSCGLAALNIDDLYYFASGGVLGSLLSSSMIPRFNSMGA
                     TLILLCVWGAGLTLFTGWSWLTIAEKIGAGVLACLTFMSNRSRRDEDYREDDERDALNV
                     QHDEVSGEAITQQRDDDDVLFSTPSVAGVVNDTAMDDKIEEASSLTENAPVTTQPISLA
                     EAPVVNSVLSEVVLPVTPSAIDSTPSLNPPLYSFEVPDAPIAMPEIMTSPEIHSSASMP
                     YGNTYENSAVPPIVTSPIVQPFAEPPQPARETDFNVNNTFMPAFSADADDNLQIKRGVG
                     PELPRPNPVRIPTRRELASYGIKLPSQRLAEEQARLQAQSGSAEMELTNDVYQEETLDD
                     VAEQEAALQQAYLDQQRQRYGDEYPLQEDDEDALLQAQLARDFDAQQQSRYDASSSEHD
                     EHIRAPITPPVTSEPIQSNPVVPHNAFSFSPFSAESEREPEPRTSSEPTYSQPTYNTEP
                     DLPPMHADEDESDERNPLMFDQPVQSTSAPVDVTRQENATAPAHHPAMDGLIHPFLMRN
                     EQPLQKPTTPLPTLDLLTSPPTSEAPVDNFALEQTARLIEARLADFRVKADVVDHSPGP
                     VITRFELDLAPGVKAARISNLSRDLARSLSVVAVRIVEVIPGRPYVGLELPNAHRQTVY
                     LREVLDCDAFRHNPSPLAIVLGKDIAGEPVVADLAKMPHLLVAGTTGSGKSVGVNAMII
                     SMLYKATPEDVRFIMIDPKMLELSVYEGIPHLLTEVVTDMKDAANALRWCVGEMERRYK
                     LMSALGVRNLAGYNERVMTANAMGRPIPDPFWKPGDSMDMTPPVLEKLPYIVVMVDEFA
                     DLMMAVGKKVEELIARLAQKARAAGIHLVLATQRPSVDVITGLIKANIPTRIAFTVSSK
                     IDSRTILDQSGAESLLGMGDMLYMAPNSSIPIRVHGAFVRDEEVHAVVQDWKARGRPQY
                     IDNIVSGGDDAEGGSLGLDGDEELDPLFDQAVGFVVDKRRASISGVQRQFRIGYNRAAR
                     IVEQMEAQGIVSSPGHNGNREVLAPPSME"
     CDS             complement(77140..77634)
                     /codon_start=1
                     /product="Leucine-responsive regulatory protein, regulator 
                     for leucine (or lrp) regulon and high-affinity 
                     branched-chain amino acid transport system"
                     /label=Leucine-responsive regulatory protein, regulato
                     /db_xref="SEED:fig|6666666.356859.peg.81"
                     /translation="MVDTKKRPGKDLDRIDRNILNELQKDGRISNVELSKRVGLSPTPC
                     LERVRRLERQGFINGYTALLNPHYLDASLLVFVEITLNRGAPDVFEQFNTAVQKLEEIQ
                     ECHLVSGDFDYLLKTRVPDMSAYRKLLGETLLRLPGVNDTRTYVVMEEVKQSNRLVIKT
                     R"
ORIGIN
        1 aacaaatagc caatagcgcg gaagctttga gggaacaaga tcgataaatg caaaaaagca
       61 cccaaaatga gtgcttttat aaggctgata tttatgacta acaattagcc ataaatgtta
      121 gcgcggtcgc ggagttcctt gcccggttta aagtgaggga cgtacttacc ttccagctca
      181 actttatcac ccgttttcgg attacgaccc acacgcggtg cacggtagtg aagtgaaaaa
      241 ctgccaaacc cacggatttc aatacggtcg ccttcggcta acgtagaagc catttgttca
      301 agcatttctt tcactgcatc ctcaaccact ttggccggga tatgagattg ctgtccagca
      361 agcctttcaa taagttcaga cttggtcata gcgcctccaa atgcgtggct atcaatagcc
      421 gggataactg actaccgtta caagaatgag caactcacgt tgctcattct accgttgtga
      481 ttactcgcct ttagctgctt tgaacgcttc tgccatcgcg ctggagaaat tgttttcttc
      541 cggcttgttg ttaacagttg cgattgcatc tttctcgtca gcttcgtctt tcgcacggac
      601 agacaagcta acaacgcggt ttttacgatc aacaccggtg tatttcgctt caacgctgtc
      661 gccaacattc agcaccagtg ttgcgtcttc gatgcgatcg cgagaagctt cagaagcacg
      721 cagatagcct tctacgccgt ctgctaattc aactgtagca cctttggcgt caactgctgt
      781 aactttacca gtaacaatag cacctttctt gttaacagac aggtagttat tgaacgggtc
      841 ttcagacagt tgtttcacgc ccagagagat acgctcgcgc tctgcgtcaa cctgcagaac
      901 aacagcggcg atttcatcac ctttcttgta ttcgcgaacg gcttcttcgc cagccacgtt
      961 ccaggagatg tcagacaggt gcaccagacc atcgatgccg ccgtccagac cgatgaagat
     1021 accgaagtca gtgattgact tgattttacc ttcaacgcgg tcgcccttat tgtgagtttc
     1081 tgcgaacaac tgccatgggt tggatttaca ctgtttcagg cccaaggaga tacgacgacg
     1141 ttcttcatcg atatccagaa ccattacttc cactacatcg ccaacgttaa caactttgga
     1201 tgggtggatg tttttgttgg tccaatccat ttcggaaacg tgtaccagac cttcaacgcc
     1261 ttcttcgatt tcaacgaagc agccgtaatc agtcaggttg gttacgcgac cagtcagacg
     1321 agtgctttct gggtaacgct tagcgatagc gacccatgga tcttcgccca gctgtttcag
     1381 acccagagac acacgggtac gctcgcggtc gaatttcagc actttaacag tgatttcgtc
     1441 gcccacattg acgatttcgc tcggatgttt aacacgtttc caagccatat cagtgatatg
     1501 cagcaggcca tcaacgccac ccagatcaac gaatgcaccg tagtcagtaa ggttcttaac
     1561 gataccttta acttccatgc cttcctgcag gttttccagc agttgatcgc gttcagcgct
     1621 gttttcagat tcgataactg cacggcgaga aacaacaacg ttgttgcgtt tctgatccag
     1681 cttgataact ttgaactcaa gctctttgcc ttccagatgc agcgtgtcgc gaaccggacg
     1741 aacgtctacc agagaacctg gcaggaacgc acgaatgccg ttcagctcaa cagtgaaacc
     1801 gcctttaact ttaccgttga taataccagt aacagttgca gcttcttcgt aggctttttc
     1861 cagcgtcagc catgcttcat ggcgtttagc tttttcgcga gaaagcagag tttcgccgaa
     1921 gccatcttcg atagcgtcca gagcaacgtc tacttcatca ccaacctgaa tttccagttc
     1981 gccctgtgcg ttcttgaatt gttctaccgg aatggcagat tcagatttca gaccggcgtc
     2041 aaccagtacg acatctttat caatagacac aacaacacca cgtacgatgg aaccaggacg
     2101 ggtttcgatt tctttcaggg attcttcaaa gagttgagca aaagattcag tcatgtttga
     2161 taatcttaag ggtttcaatt taacgtccat ctggcatcct gctcgatggg gttgtttaac
     2221 atgccccgct gtgcatcctt acagcgaggt aaaaattcag ttttctgtga ttacgacgct
     2281 aaaatttcgc gggcataagc caacgcgcgc gctatcactt catcgattgt catttccgtt
     2341 gaatccagca ccagcgcatc ggcagcaggt actaacggcg caacggggcg gctacgatca
     2401 cgatcgtccc gttcttttat ctcagacaaa agacgttcaa agttaacatt aaagcccttc
     2461 ccctgcaact gtagcatgcg acgttgtgca cgttcttccg cactggcatc caggaaaatc
     2521 ttcactgggg cgtcaggaaa gaccaccgtt cccatatcac gtccatcggc aatcaacccc
     2581 ggagcctcac ggaaagcacg ctgccgacgt aataatgctt cacgaacacg aggaaaagct
     2641 gcagcctgag aagccgtgtt gcccaccgct tcggtacgaa tttcgtggct aacgtcttcg
     2701 ccttccagaa tgactttcaa ctgcccgtct tctgcaacaa agcgcacatc aagatgagag
     2761 gctagcggga ccagcgcatc ttctgaactg atatccacat ggtggtgtaa cgccgccaac
     2821 gccaaaacac gatagatagc ccccgagtcc agcaggttcc attgtaaagc ttcagccaat
     2881 gccttacata aggtaccttt gcctacgccg ctcggtccgt caaccgtaac taccggtgcc
     2941 atcaccgtca tttctctctc cttaatactg ggaagttccg cttatgccgt ttatggcatt
     3001 acggagcctc attatacgca tcaatgcaga gaaaggttac cccaatggcg gaatggcggg
     3061 aaaaataagg cattctctga acgcgctacg caatttcaga aaaaaacaca gcggaatgtg
     3121 gtggaaatcg atcgaggaaa aaaggcacga aaaccgtgcc ttagaatgga atcacgctag
     3181 ttcgctgaga cgcgccaatt gctcgaagta gtcagggaag gttttagccg tacacttcgg
     3241 atccaaaatc gtgactggcg tatccgacaa cgccaccagc gagaaacaca tcgccatacg
     3301 atgatcgttg tacgtaccga tttctgccgc tttcagcttg gccggtggcg taatacgaat
     3361 gtagtcgttc ccctcttcca cttccgcgcc cactttgcgc agttcaatcg ccatcgcagc
     3421 taaacgatcg gtttctttca cacgccagtt atagatatta cgtagcgtgg tggttccgcc
     3481 ctgagcgaaa agcgccgccg tagcaatagt cattgcggca tcagggatgt ggttcatatc
     3541 catatcgatc gcgtgcagtt caccacgttc gcattcaata taatcctcgc cccagcgtac
     3601 gattgccccc atcttttcca gcacatcagc aaagcggata tcaccctgta cgctattacg
     3661 gcccacgcca gtcacacgta caacgccacc tttaatcgcc gccgcagcca ggaaataaga
     3721 ggccgacgac gcatcgcctt caaccagata atcacccggt gagcgatact gctgacgacc
     3781 tgccacgaag aagtgctggt aattttcatg gcgcacgtca ataccgaacg ctttcatcat
     3841 atgcagcgtg atatcgatat acggcttgga aaccagatcg ccctgaatgc tgatttgcgt
     3901 atcctgcgcg gccagtggcg cagtcatcag cagagcagtc aaaaactggc tcgatacact
     3961 accatctacg ctgatttcac cgccctggaa accgccgtgt agacgaagcg gcggataatt
     4021 ctcctgttca agatagtcaa ttttcgcccc gccctgacgt agtgcgtcga ccagatgccc
     4081 gatcggccgc tctttcattc ggggttcgcc tgtcagcaca atatcgccat ccgtcaggca
     4141 cagcgctgca gccagtgggc gcatcgcggt acccgcgttc cctaaaaaca gttctagcgg
     4201 ctgcgacgct gcaaatgcgc cacccagtcc aataatttca cacacggtcc ggtcggatga
     4261 cagatgatat tccaccccca gcgccgttaa cgcagtaagc atatgacgga catcgtcact
     4321 gtctaacagg ttagtcagtc gggtctttcc ttccgacaag gcggctagca aaagcgcacg
     4381 gttagaaacg cttttggacc ctggaaggtt aagggtaccg ttaatcagct tgatggggtg
     4441 taaggtcagg gattcctgca tgtgaagcct attctttcaa agtggatata aaaaccccgg
     4501 aaagcccggg gttgatcaaa atgtatagcg gggttgacgt taatcaaccg tggcggcgta
     4561 cgaagtcggc cataaactca gtcagcgctt tcacgccttc caacggcatc gcattgtaga
     4621 tagaagcacg catgccgccc acaacacgat ggcctttcag cgcatgcaga cccgccgcga
     4681 ctgactcttc caggaagact ttatccagtg cggaatctgc cagtaagaac ggtacgttca
     4741 tacgagaacg gttcgccaac gcgacgtcat tacgatagaa gtcgttacca tcgatcgcgc
     4801 tatacaacaa gtcagctttc tcttggttac gtttttccat ttcagccaga ccgccatgct
     4861 ctttcagcca tttgaagacc atgccggaca gataccaggc aaacgtcggc ggcgtgttaa
     4921 acatggagtc attgtccgcc agaacttggt aatccagaat cgatggcagt tcacgacgtg
     4981 ctttacccag caaatcctca cgcacgataa ccagcgtcag gccagcaggg ccgatatttt
     5041 tctgcgcacc ggcatagatc acgccatagc ggctaacgtc aatgcgacgg gacagaatgc
     5101 tggaagaata gtcggcgacc acaattttgt cgccaaaatc cggctcttct tcaatcgcaa
     5161 taccgtcaat ggtttcattc ggacagtaat gcacaaacgc cgcgtcatca gacaatttcc
     5221 attcacgcat cggtttaatg ccgcgcagat cgtctatgcg cgtttttacg tcaatcacgt
     5281 taggcgtgca gtacttttcg gcttcattga ttgcactgtg tgcccaatat ccgccgtcga
     5341 tgtagtccgc tgttgagcgc tcacctagga gatttaacgg cactgccgca aattgcgcac
     5401 gagcaccgcc gtggcaaaag agcactttgt agttggaggg gattttcagc aaatcacgca
     5461 gatcttgttc ggattcagcg gcaacctgca taaactcttt actgcggtgg ctgatttcca
     5521 tgaccgatgt tcccaggcca ttccaattac ataattcctg ttcagcacga cgcagtactt
     5581 caaccggcag cattgctgga ccggcgctaa aattaaaaat ctgagtcatt tcccctcacc
     5641 acacctgaaa aatagcggct gttttatcac cgttgttaca aataccattt ttatacccgt
     5701 catacttcaa gctgcatgtg cgttggcttt cctgcaactc gaattattta gagcatatag
     5761 acctgccggt tataaaaaca ccgctgttac aagatcgtag ctataacgga acgaccgcca
     5821 taaccacact acttttaccc tgctatcggt tttatcactc gtccatcgcg gctgcaatgc
     5881 ttattgcgct ttcattatgc aaaacgacac gttacgtagt ctgttctttt tcgctgttgc
     5941 cgatctgtta tgaatgaata gagtccagac agaaaaatcc gtatcatgcc gcttccgcta
     6001 atctcgataa gagtgaacac catgactcaa acgtttatcc caggcaaaga cgccgccctg
     6061 gaagactcca tcgcccgttt tcaacagcaa ctccaggacc tggggtttaa catcgaagaa
     6121 gcgtcatggc tgaacccagt gccgaacgtc tggtctgtcc atattcggga tcgcgattgt
     6181 cctctctgct tcactaacgg caaaggtgcc agtaaaaaag cggctctggc ttccgcgtta
     6241 ggcgagtatt tcgagcgtct gtccaccaac tatttctttg ctgacttcta tctcggcaaa
     6301 actatcgcta acggtgattt cgttcactat ccgaatgaaa aatggttccc tattccagaa
     6361 gatgatgcgc tgccggaagg tattctggat gcccgtctgc accagtttta cgacccagaa
     6421 caggaactga gcgccagcga tctgatcgat ctgcaatccg gcaatgccga cagaggtatt
     6481 tgcgcactgc cgtttactcg tcagtccgat cagcaaaccg tctatattcc gatgaatatc
     6541 atcggtaatc tgtacgtctc taacggaatg tccgccggta acaccgccaa cgaagcccgc
     6601 gttcaggggc tgtcagaggt gtttgagcgc agcattaaaa accgaatcat tgctgaatcc
     6661 atcagcctgc cggaaattcc acaagacgtg ttgaaccgct atccaggcgt ggtcgaagcg
     6721 attgcaacgc tggaaaaaga aggcttcccg attttttcct acgatgcctc actgggcggt
     6781 aaatatccgg ttatctgtgt agtactgttt aatcctgcta acggcacctg tttcgcctcc
     6841 ttcggcgcac accctgactt cggcgtagcg ctggagcgta ccgtcactga actgttgcag
     6901 ggtcgcggcc tgaaagatct ggacgtattt actccaccga cgttcgatga tgaagaagtt
     6961 ggcgaacacg ctaatctgga aacccacttt atcgattcca gtggtctgat ctcctgggat
     7021 atgttcaaga agcaggcgga ttatgaattt gccgactgga gctttaaagg gtcgacagaa
     7081 gaagaattcg caacgctgat ggcgatcttc cagcaggaag ataaagaagt ctacattgct
     7141 gactatgagc atctggccgt ttatgcctgc cgcatcatcg tgccgggaat gtcagatatc
     7201 taccctgccg acgatctgct gttagccaat aacagcatgg gtgctcatct gcgtgacaca
     7261 ctgctggcgc tgccggacag caaatggaaa aaagaagact atctggcgct gttgcaacag
     7321 ttggatgatg aagggctgga tgacttcact cgcgtacgcg agctgcttgg tattgccacc
     7381 ggaaaagata acggctggct cactctacgc gttggcgaat tgaaagccat gctgggtctg
     7441 gccggtggcg atctggatca ggctctgatc tggacagaat ggacgcagga tttcaacgac
     7501 tccgtcttta cggcacagcg cagcaattac taccgctgcc tgcaaaccct gctgttactg
     7561 gcacaagagc ctgagcgcga tccagcagaa tattacgatg cgtttaccaa aatgtacggc
     7621 agcgagacgg tcgaggctgc cagtgccgcc gttgctggag aagcgtgttt ttacggtctc
     7681 tttgccgtgg atgacacatt tacttcttta cctgcgcacc agtcgctact ggctgcctat
     7741 gaaaaactgc aacaagctaa acgtcgttat tggcaggcta aataatgcct gagtgaggca
     7801 gccagcacgc gtctcatagc gatgagtgcg atccattgca aatagcaatc tacgcatcac
     7861 cacctgaaat agccctttaa tttaaagggc tatttcatta tccaaagggc aatactgatt
     7921 attcgtgatg cataaccaga gtattgttat tgaatggtga atttttaatt aaattacctc
     7981 gacaaggtgg tactaaaatt ctacaaaaca tgattttcat taacgctaaa tcggtaggtt
     8041 taacgtatgc cattcaactc tttttgtaaa atttaaaata tttttatatt atataattca
     8101 atacgttacc tataaaatta tactatcacc ccctacttac ctgcctatta atttcttgca
     8161 atatgatcca catcaaattt taccgtatac tgctttgtta gtatctcaac gctgataaat
     8221 tttaagagag agttagtgtg aaagctgaca accccttcac tctattacta ccggccgcta
     8281 tggcaaaagt tgctgaagac gccggagtct ataaagctac caaacaaccg tgtacgacgt
     8341 tttatttagc gatcactgcg ggtgtgttta tttcgatcgc cttcgtcttt tatattactg
     8401 ccactaccgg gaccgcgacg attcctttcg gtatcgcgaa actgatcggg ggtatctgtt
     8461 tttcccttgg cctcatgttg gttgtcgtct gcggcgcaga cttgtttacc tcaaccgttc
     8521 tcatcgtgat tgccaaagcc agtggacgta ttacctggaa acaactagcc tgtaactggg
     8581 ctaatgttta tgtcggcaac ctgattggcg cgcttttctt cgttggactt atctggttct
     8641 cgggagagca tatggtcgca aacggtgcgt ggggtctgaa cgtcctgcaa acagctgaac
     8701 acaaacttga acatacgttc gttgaagcgt tgtgtctggg tattctggca aacctgctgg
     8761 tctgtctggc cgtgtggatg agctattctg gccgtacgct tacagataaa atgtttgcaa
     8821 tgattctgcc tgtcgccatg tttgtttcca gcggttttga gcacagcatc gccaacatgt
     8881 tcatggttcc tatgggcatc gttatcaaaa attttgcggc cccggaattc tggaatgcca
     8941 ttggcatggt gccgtctcag tttgaacatt taaccgttag ccacttcatt accgataatc
     9001 tgattcccgt caccctaggg aacatcatcg gcggcggcgt aatggtcggt ttaacatatt
     9061 gggtaattta tttgcgcggt ggagacaagc accactaagg tgcaatcggc cgcaacgtcg
     9121 ggttttaaga aatccatatc aaaggtaggt gtaaaatgac cgagctgaat gaaaaattgg
     9181 ccaatgcatg gcaaggcttt agcaaaggtg aatggcagga taacgtcaat gttcgtgact
     9241 ttatccagaa aaactacacg ccgtatgaag gtgatgagtc tttcctagct ggcgcaacca
     9301 aagcgacctc agcgctgtgg gacagcgtca tggaaggcat caaacaggaa aaccgcactc
     9361 atgcgcctgt tgattttgat accaatgttg ctgcaactat cacgtctcac gacgcgggat
     9421 acatcaacaa aggcctggaa aaaatcgttg gtcttcagac tgacgctccg ttgaaacgtg
     9481 cgttaattcc gttcggcggc atcaaaatgg ttgaaggttc atgcaaagtt tacggtcgtg
     9541 aacttgatcc tcaactgaaa aaaatcttca ctgaataccg taaaacgcac aatcagggcg
     9601 tgttcgatgt ttacacccca gacatcatgc gttgccgtaa atctggtgtt ctgactggtc
     9661 tgccggatgc ttatggccgt ggccgtatca tcggtgacta ccgtcgcgtt gcgctgtacg
     9721 gcatcgacta cttgatgaaa gacaagtttg ctcagttcac ttctctgcaa tccaaactgg
     9781 aaaatggcga agacttggaa gcaacgatcc gtctgcgtga agaaattgcc gatcagcatc
     9841 atgcactgag ccaaattaaa gaaatggcag ctaaatatgg ctgtgatatt tctagcccag
     9901 caacgacagc tcaggaagcc gttcagtgga cttacttcgg ctatctggct gcagttaaat
     9961 cacagaatgg tgcggcaatg tccttcggac gtgtctccac cttcctggat atctacctcg
    10021 atcgcgatct gaaagcagga aaaatcacgg aagaagaagc tcaggaaatg attgaccatc
    10081 tggtcatgaa actgcgtatg gtgcgtttcc tgcgtacacc tgagtatgat gagctgttct
    10141 ctggtgaccc gatctgggca acagaatctc tggctggtat gggtctggat ggtcgtacac
    10201 tggtgagcaa aaccagcttc cgcttcctga acaccctgta cacaatgggg ccttctccag
    10261 agccgaacat gaccattctg tggtctgaga aactgccaca aagctttaaa aactatgccg
    10321 ctaaagtctc catcgatacc tcttctctgc aatacgagaa tgacgatctg atgcgtcctg
    10381 actttaacaa cgatgactac gcgattgctt gttgcgtaag cccgatgatc gttggcaaac
    10441 aaatgcagtt cttcggtgcc cgtgcaaacc tggcaaaaac catgctgtac gcaatcaatg
    10501 gcggcgtgga cgaaaaactg aaaatgcagg ttggtccgaa atcagaaccg atcaaaggtg
    10561 atgttctgaa cttcgacgaa gtgatggaac gtatggatca cttcatggat tggctggcta
    10621 agcagtacgt cacctctctg aacatcattc actacatgca tgacaaatac agctacgaag
    10681 cggcgctgat ggcactgcac gatcgtgacg ttttccgtac catggcgtgt ggtatcgctg
    10741 gtctgtctgt tgctgctgac tccttgtctg ccatcaaata tgccaaagtt aaaccaattc
    10801 gtgatgaaga tggtctggct atcgactttg atatcgaagg cgaatatccg caattcggta
    10861 acaacgactc tcgcgtagat gaactggctt gtgacctggt tgaacgtttc atgaagaaaa
    10921 ttcagaaact gaatacctac cgtggcgcaa caccaactca gtctgttctg accatcacct
    10981 ctaacgtggt atatggtaag aaaacaggta acacgccaga cggccgccgc gcaggcgcac
    11041 cgttcggacc aggtgctaac ccaatgcacg gtcgtgatca gaaaggtgcg gttgcctctc
    11101 tgacttctgt tgccaaactg ccgtttgcgt acgcgaaaga tggtatttct tataccttct
    11161 ccatcgtacc taacgcgtta ggtaaagacg acaacgtgcg taaagctaac cttgctggcc
    11221 tgatggatgg ttacttccac cacgaagcca gcatcgaagg cggtcaacat ctgaacgtca
    11281 acgtcatgaa ccgtgaaatg ctgcttgatg cgatggaaaa cccggaaaaa tatccgcagt
    11341 tgactatccg tgtatctggc tacgcagtgc gtttcaactc actgactaaa gaacagcagc
    11401 aagacgtcat tacccgtacc ttcacacagt caatctaatt tccatggctg tctgaaaaag
    11461 cgtaaaataa aggctccacg tcagtggggc ctttttctcg ccctcgcttg tcgttcagat
    11521 tgtcagcctg ttttgccagc ccgctatatt gccttcatca tgtggatggc ttgcaaaaca
    11581 gattcgacgc agcatctgtc atacggtgtt cttctgtcag aaattcctgc cagataggta
    11641 cctgctttct catgactgcg ctcataaaga ccgctattgt ccggtcaaat ttggagaaaa
    11701 cctcgcaatg tcagtaatcg gtgacctgaa atagaccata acaacatgaa ataaaaggat
    11761 ttattttatt caatgtccac acattgacca catcgacaat aagcccgcgt aattgcgggt
    11821 tttcttttgc cttctcactt tacacttaaa ttatcatata gtattttact atatttcaat
    11881 tgagatagat aaaaggatgc ttccatgcca ctactcgact acatcaaaaa atactacaac
    11941 gggaatcagg catcgtttgc ccgactcact ggcgtacaac ctgcccaggt gacgcaatgg
    12001 ctggaaaaag gattcatcgt tgtagatcac acactgtaca gcccacgtcg caagctcggc
    12061 atttaaacgt gtcgggcgaa ccatcacaga acgccctgaa tctgctttcc gtcatcagcc
    12121 cgctagcttt ttttacggcc ccttaacgat ccttttgtag atcctttcat gcaatatttt
    12181 gcaaacactt ccgacaacgc tatcaccctg caagccgcgc ccgcactgga tttctcgcat
    12241 ttcggcaaaa ataacaacct caaaatttgt tcataaaaaa agtgacgaaa accgcaagtg
    12301 atccttttaa aacaatgcat tactcaattc atcacgcggg cgtcatgcgc ctgattttgc
    12361 aaaatgctgc aaaaccttgc gtaccgtgca aaagcgccca gacaccagaa ccccagccac
    12421 cgcgcgggct ggcggtatgg tttgcgccag atttcttttg caaaattttc atgatccaaa
    12481 tcgtgcaggc gggtgcggtg tagcgcgctt tacgtctcgc tggcgcttcc gtatgcgggc
    12541 tgagaactcc ggcgcgggcg atggttgagc gatcacgaaa cgacacagac cgtcacgtta
    12601 atgacagcct gcggggctta gaatttgatt gatgcggttt tacgtggaag ggtaaaaatg
    12661 cgcagcctat caggcgatga aggggccgta tttctcgctt aacgccgtag cacgttgacc
    12721 ggtaccattg atcgcctcgg cgttaagcgg tgtgccggta ttgttatgcg tgtggttggc
    12781 cgtctgctgc gccagcgtgt gcagcacgtc cagtgtgtcc gtcagtagcg tgagcacatt
    12841 caactgatcg ttgcccagcc tgattgatgg cgcaatcaat tcttgttgtg cggcgacact
    12901 gcgacggata cccgcgatac gctctgttag tgcccccgca acctctgaat ggtagttctg
    12961 gccgacatag tcattccggt ctttgctgct acgtatcagc atgtttgccg acgttccgat
    13021 cgcataatcc ccgtccgcca atgccacaac cgcgccagcc aataatttat gggtaccgag
    13081 cacggttgtg gtgtctgtcc cgttgactgt ggttgtccgt gtcgtggtcg tgcgagtttc
    13141 tgcatcgctg gtaacgtggc gctgactgct gcgttcctga atagtctggt cagtttcacg
    13201 ctgccaactg ccatcagttg tgacacgctg gctgacgcct gcgcgttgct gctggagctg
    13261 ttcacctggc ttaatatctg gcaatgccat gccgtcctgc atggtctgcc tgataaccgg
    13321 tttatcgggc cgtccctccg cgaagccaat ttcaacaacc gatcccgcag gcggatactg
    13381 aaacatgccc ccttcagccc ctgccatcgg aacgggcagt ggtaccgcgt gatattcggg
    13441 tgtgtcggcg gcagggttgc cgttctcatc catcagttgc aggttgactg catagcgggg
    13501 acgaaacgga tcagactggt cacccagcgc ggcactgtcg ttagtgctca tcactcgcgc
    13561 cagacgtggc aggtgtaatc cggcgctcag ctctgggtaa tgctgttcta tctggcgttg
    13621 cgcgggcggc ttctgcgcgg gtttgccgct ggcattcagt ggtgtccacg tcagcgacat
    13681 ttcatcatta tcaatagcca ctttggtaat gcgtcggctg ttaacaataa cccctggacg
    13741 aatagccgga atgaccggca atgtctgggt attccctgcc ccgcctgcgg tagaaaattc
    13801 attgggaacg tcaacaggag aatcagcaaa acgcgaatcc gcgtagctgc ccacataaac
    13861 ctcaccatcc ggcaactgga accacgtata gtcaggaatg gcaaacgcac gccccaaatt
    13921 agccagtagc agataaccac tgccggaatg ggtgaaatgt gggattggcg tatcgacata
    13981 ccgcgcggca ggcaatgaaa accgcatgga cgtgctggat tcgagttgtt ttatcacatc
    14041 acgtagcgtg ggatgttgca gcgagatcgg ccaatggcgc tcaaatacac caaccagctc
    14101 acgaataaac agacgctgtg cgccgttctc cgcaggcgca cagcgttcaa caaatccggt
    14161 aaaccagcgg tacaccgacg tgttgtaccc caaatctaag cgaaccagct cgcccgtgac
    14221 atcacgatcg gtcaatgccg taacaaaccc cagtccgcat ttattcagct ccagcaccag
    14281 atttaagcca ctgacgggaa tatcgtcgcc agccagccgc aatgcgatga tcggtttcat
    14341 gtctgttccc ctgcggggcc tatcttgtta tcgatttttt tcagcacgga ttcaaaccag
    14401 gagagctttt cctcaccttc atcggcgttg cctgttccgc tggccgtttg tgccgttgca
    14461 ccggcactgg ttcccgcccc gcctttggcg ctggcctgcg ccgctttacg ctctgccacg
    14521 ctaaaaaatt ctttcagcgt gaaattcacc agccaggcca ttttgtcagt ctgcggcgcg
    14581 gcatcgatag cgccggagaa ggttgcttcc ctgaacttta tcgcctgggc gacttcattc
    14641 gccacgcggt aacgcttcat gctgccgtca gcacttttag cctctgccag cgcaaacagg
    14701 cgggtaagct gtgttttctc agcaaacggg atcaaaccgg aaacccgcaa ttccttgccc
    14761 ttaattccct gctctgcgct ggccgtgctg ctggcctgcc cgctctggtc tttatcctga
    14821 atttgcattg agggcgacac cagaatattt tttagcaata tcgcctcacc atccaacgcc
    14881 agcacaataa tctgattcat cgttctgtca ccatttcacg cagcggcccc aaatcctcgc
    14941 caacaaacat catgcacagc gtcaagacgg catcagggtt agggatatct tcccgcatgt
    15001 ccagcagcgc cgtttcgaca ctaccgctga cttctaacgc ccaaataggc actgacatcc
    15061 cctgtagctg ctgtaatgtc tcacccgctg cggctaataa cgtctgacgc tgggcagcaa
    15121 accctgccaa cgcgtcggcg atatccgcca tacccgcgcc gcttgcctgc ccgatagcct
    15181 gctgcatcgc ctgcgcagtg gaggccgagc gggcggtact gaatgacagc ggtaccgcag
    15241 cgggcaaact gcctgccatc atggggcgct gcattttcgt taccgccaga ctcaacgccg
    15301 agcgtgcacg gcgctgaacc tgcgtcaaat caggcaacgg gaacaccgca gcggcggcag
    15361 ttaacaacgt aataaattgc tcaatcgtgg gcgcagttat catgaatatc acgacatcat
    15421 gattggcggg cgtacccgcc aattttcccg ccagtgtgtt aacggcgttg ggcggactga
    15481 gaaaaacacc agattccacc gtctgcccga caccaaacgt ccacggatga acgaccactg
    15541 tcgagcatgt gattgggcgc atgttcgcgg ggatagccag gcgtttttca tgccacattt
    15601 actgtggtgc ctccggccag tcgattttcg ccgcattcac atcaatgcga ctcagcagca
    15661 ccgcgtattt ctgccacgct gtcagtgccg ttttctcgtc atcggtcgca atgtccagat
    15721 caatggcata ggtcagttca ttaatgcgcg atgtcgcagc ggctttgcgt gtcgccagct
    15781 ccagctgtgc ggccttgagc gcggcggcgg cttgcgcggc tttatcgata acccactttt
    15841 taccgttcca aacatcgaat tcggtggcag gtttcagcag cgtgacgtta tccggcagtt
    15901 caccgaactg cgtaacgatc tgtgcctgcc gcgtgttcat gctataaacg gtctgacctc
    15961 tatagtctgg cacagcctcc cacgcctttc cgtcatctgt acggcgcagc gcctgaccaa
    16021 cgggcggtaa ctcgggttca tcggcgtagc tgtcagcggg taagccaaca ccctgcatga
    16081 cgtactcata actagctgac tgatattcgc gtgtcgcgga gttcacgtga taaaccgtaa
    16141 tccagcccgc attgattgcc agcccgcttt cattcagctc tgcgttttta atttgtgttg
    16201 aatagttgct cattatgcgg ctctcacgat gtagttaaat gcgatattgc gtgggcggtt
    16261 ttccgacgct gtcggcacag tgcgtgatgc gtcaaaacgc atgcgtgatg ggcatgaatc
    16321 ccccgcccca tcagcgatag cgccaacacc aaattcatgc agcaattcaa acacgccgct
    16381 tgattgcagg ttttccccta aaaactgaag attctgtgct gtcgtccaga tctcgccagt
    16441 gatattacga atagcatcgc cttgagcact gagcagtaca cgtgcggcgt caataccacg
    16501 ggcatcatcc caccccctga taaactcgcc gcgcaagtcc ggcaatacgc cagacgggta
    16561 cgccagcgat aacttagggt attcggattt gttaaacgac tgacctgcgc acttcatcca
    16621 gccagtcggg gcgactgcct ggggccacgg cagtggaata cccgcgccgt cattgatagc
    16681 ggactgcaca aattcggttg atgcaatctg cgttgtattc gtaccctgtg ccgcggttgt
    16741 tacgcgaggc aatccgtgta agctgacttc gccatccacc aatctgattg atgaccctga
    16801 tcggtgctca aacgttagtg cctgctcgtt attgccgtac cgcatcccga caaacgctat
    16861 cgcctctgtg ctctgcgcat tattaaactg gatgtatgca cgctgcccgt tagccgtggg
    16921 ctttatcgtc aacacgtcat cgtcggcaga cagcaatttc tttccggtaa tcacctgaaa
    16981 tgtattgagg ctgacggcac caatgtttga caaaaagacg cctacatcat tgatatccga
    17041 accgttctta tctttctcca gttttcccgt taacgcgctt aatacctttt tagaaaaatc
    17101 aggatcattg ttgaccgctt cagcgaggct tttcagtgtg tccagatcag caggcgaatc
    17161 attcactaac gccagaattg ccgctttcac aaattcagtt gtagcaatct ggctattact
    17221 ggtcagttgc gacgcggtcg gcgcggttgg cgctccaatc agcttagggc tcttcaatgg
    17281 cgcatatttt tcagccgctg catcaatctg taaaaaacgc ttatcgagca aatagacagg
    17341 ggacgccata cgattatcaa caacctgccc cgccgtgatg gtagcgacct tcgctatgta
    17401 gtgtgcatag ccgttttcgt cagtgtaatc cgccagttcc gccgcagtgc ggagcgttac
    17461 acggttttcc catgcacccg tcaccgttcc ctgacggcta acgtccaccc atacgcccgt
    17521 attcgcacta acagccagtt gttccgcagc atccagcaca gcacgcaaac caccgacata
    17581 ccccacacct ggtgctacca tcgcctgcgt acccgcaacc gatacgttga acccatcccc
    17641 cagaaatgcg gcggggccgt agtaatccaa caaagccaca cggagtgcgt catccatgcc
    17701 gtacaggcgg gcagaaaaat caatctgcca ggtctgcgca gatacattga tctgcgtcgc
    17761 ttctgcggcc ccgtcaaact gcatagccag atttctggtc aggctgtttc cctgcctgcc
    17821 gttctgcgtt tttatttttt gctgagtacg aacatggaca atcatcagta ccgtttgggt
    17881 ttgactatcg accagcccta tccagttgta atcccaatcc ccgatagcgg tgtctaacac
    17941 aacggaatag accaccgcgt tagtattgag cacacccgat tgcgtgatag cggcacggtg
    18001 tttgattgcg gcggcgtcgg gcatcccctc atcacggctc accgcctgat cctcatcctg
    18061 attagggatg agagcgaaaa caatctgatc gggaacggcg ggttgcccgt ccagcgtttt
    18121 ttttacgttc catgcttcaa atgcacgggt aacaatactc tgtgccataa atcctcactg
    18181 actggctgtg tagtattcgg ttgatgaggt aaacgcgggg gcgttcgttg gggttcgccc
    18241 ttcgaccagg ccatgcacag tgtcaacatc gaccgcgtaa aacgcggcat catggctgaa
    18301 ctcagcagca cgaatacggg atatatccgc gttcgttaca tcaaaatggt agcgtcggca
    18361 cgtccggcca tactggcgga tcaaatccat catcaacgtg ttataggtgc cgagttgctc
    18421 gtcatccagt tgcaccagga taacgtccca gtcatgtgcg ggctggcgtt cagccagcgt
    18481 cacatcaccg atatcaagcc gcctgaagat gttgataaac cccgcaacgc tgcccgcatc
    18541 aaccgcgttg ataaacgcga acttcacccg tttgcggtag agtgctaacg gctccccgtt
    18601 aaaccgctgg atatcacgct gataggccat cgcgtcaagc agcgccacgt cacacgtttc
    18661 agcgtcaaac tgacgtaatg gaaattgcac ccagtcatac gttttcagcc aaaattgttt
    18721 tacggccgta aacagcttga ttggttcccc tttatccatc cagggtggca gcggctgact
    18781 atccagccac gttttgaact cagacatttt taaataccac gctgacaccc gacaggcgcg
    18841 gaatgctcag atcactgaca atatctgact cactgaaggt gattgactcg atcacaggaa
    18901 aatactggtg acactccccc gccagagctg aaaaggaaaa acgggaatag ggccacgtct
    18961 ttttcacgtc ataatcggtg ttctgacgga atgcacagcg gatcagatcc agcacgttaa
    19021 cgcgtaacgc ctgcaattcc tgtatcgtga aattttcata atttttcagg taaaccgtga
    19081 cgccgagcgg tacatcaaac tccggcaacg gcatacacag gacatcatca ccgtgcccgt
    19141 ggtgcccttg cgccatcaca taatcattga ccgtatcgat aaatggctga ctggcaacgc
    19201 cggaatccag caacaaaaag acattggctg tacctggccc gcgtggcgcg tcatgctgaa
    19261 aaaagatacg gtcagtcgtc agccctgcaa tctgcgcaat cgcgccacga tagacggcat
    19321 caatgtgata ttgcccaggc aaattaaact gattgcgcac cctgtcgcgt agctcgtcat
    19381 cagattcaac atctgcgcct ggcgctgtca gccagtcatc gtcgttaaca acctgctcaa
    19441 tgttgtctac accaaccgat aaaatgcgat agtagccagg cgcaaggtta tgcccgctac
    19501 cggcaccggt ggcagtcacc ggaatcaagg cgctgctgat accggcatca atagtaaaat
    19561 ccgcatctgt tgtcagccgg tagacagtac cgttgatccg ctcggtctga atctgcgttc
    19621 ccgcaggaac aacggccgta atactgggat cggatttagt aaacaaaatc acgccacgcg
    19681 ctcccgccgc gcctttgcgc tcaagattga cagcccaggc gaacacatca acaaatgccc
    19741 cgctggcggt agccaggtac agatttttca tcacggtgtt aaccagcgca ttctttaacc
    19801 acatcaccgg cgcggtaaca atcgccgtga ttaatcgcca aaacggggac atacgggagg
    19861 tattcgttat catgcccgca tcggcaacaa cctcgtcaaa ctcggcacgg atctgtttat
    19921 cggtaacagg catgccctgt tcagccagaa tacgttcata gtcgggattg gggcggttac
    19981 tcataatggt tcactcactg aaatagggcc gaaatcatac gtttcagcgt caatgaaata
    20041 atttccacga ccgttatcac ggataaccac cgtccctggc accaggcgcg tatcttcttc
    20101 tgtcagcagc tccatgcgta acatgatgtc actgcgcaat accggactgc gttcagcaac
    20161 cagctgttta accagtcctg attcaatcag ccggtgaacc acatcctgtg caatgctgac
    20221 gcggttatta cacaactgcg gctcattacc ggtattcagc gtaaaatcac cgtcagtgat
    20281 tagcaggtca aaatacagtg catcactcat cctgcggcca gctcctgaga ttcggcgata
    20341 ctggtgaacg ttgcgccgtt aggtggatag atattcacgc tggcaatttc cgttttgcgc
    20401 gtatttgccg tgctttgatt attggtctgt aaggttttgg aaatcccgcc gttctgcatc
    20461 ggtggcgcgg ttattcctgc cggtgcggcc aatgtgctgc cggaggtcgg cttcaggtca
    20521 atattgatac caggcagata attcagcccc tgcgcaatga aattgtaggt ttgggtaaac
    20581 gagtccatta gcgaggccca cagcccacta aaaatatttt ttatggcgtc aacaaatcca
    20641 ccgaaggccg caacagggga taatcccgca aagaaattca cggccatttc ccacccgagc
    20701 tgtatcgatg accagaggtc agcaaaaacg ccatccagca cgcggcacgc ctcaaccacc
    20761 cagccgatag gagccaggat ccagccgata gcctccgcaa cgatacggcc acacatttca
    20821 cccgctgacg tgacgcccgc caactcttca gacgaatacg caatcggcgt taacaactca
    20881 gagaagctac caaacagcgc ttttatcccc tgccagacaa tcccgatggc agcacccagt
    20941 aaatcaaaca gcggagacag tggcgccagc gcaccggacg cctcactaaa cccactgata
    21001 aacccgttga aaaatgcttt gatggggtgc caaaacttca cgacagcgat gacaaccagc
    21061 gcaatggcag caatgatggc gaggatcggc cagatgaccg cattaacacc aatcgccgcc
    21121 gcccaggcag cgactttggt gacgataaat gacgagcgca gccagttcat tgccgttgtc
    21181 gcttttgtac cgattgaggt catgacgttt aattgccccg tgaccagcgc taatgattta
    21241 gtcccgagcg accagagcgg taacagcccc gtccagataa atctggacgc gccaaagacg
    21301 atgttagctg tcgcgcccgc tgccgcaaac gccaacgtag acagggcaac ataccccagc
    21361 cagcgggcta tgttcgggaa catatccagc catttagcaa atttttcacc gatagcgatc
    21421 acggtgttac caagagggga aatagcaggg atcagccgca tcccgatcga tactcggata
    21481 cgctcccaga ccttatcgag acgttcccac atatccgcca tttttttcgc catttccgtg
    21541 gcgcgatcca gcccctgcgt attccccata tcgcgcatat gctgacgcaa cttatcagcc
    21601 tggccccacg tcgccgttaa tgcctgcgca ccatcaccaa acgccttatt taacgcggcc
    21661 tgtgctttga tgttgccctc gatcgagctg ccaaattttc cctgtagctt ttgcaggatg
    21721 tcggggaatt gcaacatctt gccctgcgca tcggtgaaac tcagaccaag ctgtttaccg
    21781 ccctctaccg ctgatttcag aaacgcatca taaatcccgc ccgcttccgt gccttttgtc
    21841 tgcttgagca tccccatcac agaaaattgc tcatccatgc ccacacccat ctgtgtgccg
    21901 gttcctttac tggacttcac caattccttg atttcgtcca gactggtgcc aaagttctgc
    21961 accatgtacg ccccttttga cgccatcatt tcagcaaacg gaatgttgcc cattcgcttt
    22021 gccacggtgc tgaagttact cgccatgtca ttcatgtaac tggcggcacc ttcagcactg
    22081 gattttgttg ccacggccag cgtattcagg cccgtggtat atcggggaag ctcggtgtca
    22141 gttatcccag cgattgaact acggatgacc gttgctgacg cgacaaactc cgccgccgac
    22201 ttaccgtacg ccgtgctgaa tgcctgggct gattgataaa ctgcatccag cgactgcgtg
    22261 ctgacgttac gtgtcgataa ttcatccagc gcttttttga cgtcgttagc aggatcgagc
    22321 aaccccttaa cgccctgagc gacgccccac aaccccgccg ccccaactgc cacccgtgcc
    22381 agcgcatccg cactgcggtt agcaaactgt tcaacggatt gctgtgcccg ccccagcggc
    22441 gcactcagtt ggtttttcag actcaataaa aagcccagct ctctcatcgt tattccctgc
    22501 tgccgttgaa cgcaaaagcg atacctgcgg cggtactgtt aatctggcat tcgtgaaaat
    22561 actcagccag ccacgccgca cgggccagac tcatggcgtc gtcatcgtca tggggcaggt
    22621 aatgacgccg cagcgtcata tactgctcaa gctgattgcc cttaatggca tcaatcagcg
    22681 cgcttatccc tttacttcga tctccacctc tggcgcgtaa atctcgttga ccttcttagc
    22741 gatctgcgtg ccgatgccgg gtgattgcag caactcattc agcgtgtcgc gggtatcggg
    22801 ggtaacgata cgcttcagat aggtggcaat cgtgccgatg acatcaccgt cacgcgccgc
    22861 ctcgtttgac agcttgttgt acgccaccag cgttggcgaa aatgacagtt cacgaccgtt
    22921 gacggtcaac gtgatcacgt tagtttcttt gctcattgtt caatctctct gcgttgatta
    22981 acttcaatta tcagttggtt atgtcgggcg gcgcattcgc tatacagcgt gctgtacgcc
    23041 cgtaatgcct gatcaaaatc ctggccggta ttacccgcca ggcgggggag ttgcaccgga
    23101 cagcgggtta gcaaattttc ctgataaggc acgctcggcc tgctctgcgc tgtcgttgaa
    23161 caaccggaca tactcatcac tagcgcacac attaagaaaa ataggcttaa gggtttccgt
    23221 atgaaaaaca cggtcttggg tgtgctcatt ggcgcgtagc tcctgtaatt tttcttccag
    23281 cacccgcccc gattgaccgg cgatgtcttc caggctggta cgcacgccat tagcggcggc
    23341 ggtagccgca cgggtgatgc tcaactctgt gctatcgtgc tgcaagtcgt tgacatacca
    23401 gcccgccaga aacgccgcca ccacgaacgc cagtagctgt ttcatcagcg cacgccgccg
    23461 tgtgccaggc taaaatggtt accatcggga cgagaagtaa agcgcccgcc ccacgcgccg
    23521 ccgatagact cccaaaactc gccgagtggg gtgtaggctt ccgttcttga ctgatacaca
    23581 ccgtcaacaa acagattaaa atccacggcc agacgctggg tgtgcagact gttactgata
    23641 cctgcccccg atttggcatt gatagcggct tgctccgccg tccgataggc ttcgccgaac
    23701 gtcagtgaat agccgttctc tgccgcccag gtgatcaggc gtgcaaccat gaccgtaaac
    23761 gtggcttgtt ttgcgcttaa actcatgaat tcccccgtga tgctctcagt ttgcgttcaa
    23821 tgatggcttc aatcgcggtt gaaccggcga tccccagcgc cgaggccaat cccaataccg
    23881 ccagttctgg caactcagga aactggatca gggccacacc cgcgaccatt gacgccgccg
    23941 aacctaaaat aatgcggccc actaacaggc gaaacgtgat ccgttcttcg ctgaccagca
    24001 gtttccccag cccgattgcc gcccccacca acaataaatt tgcaaaaaat gacgtttcac
    24061 cgtttggcat aattcaccca atgagatccc gaatatccgt ttccgacagt accggcacgc
    24121 catcaatccg aacaaaatcg ggactggtca ccagatactt cactttatgc gtcgccgtct
    24181 ccccgccttt cggatcaaag gcaaccggcc ccgtcaggac caacttgcac ccgaacgcct
    24241 caaccttgaa ttcttcatcg ccagtgttgg cgtaaaacaa aatatcggag gtcgggatcg
    24301 cgcggtaact gcctgctaca cgcgccagtg cggtgatttt tttaaaattc ttcgtatcaa
    24361 attccatttc accttcagca ccgacatcac ccgcgacgaa accgtctgga atgccgcgcg
    24421 tttgtgatac agcagtgtta tccgtgatat ccaatgtcgc ggttttgacg tgtaccagct
    24481 cagtaccgag cgaaatatca aacgactgcc cgccgattcg ctgtgtcatc gttatgcctc
    24541 caacgtggca tctaacatga tgcccactgt gattgatttc ggactgccgt aaggccgtac
    24601 cgtgagataa accgccacgg cgaccgatga cgtccaggcg atcaccacat ccccctcgcg
    24661 gggtgactgc acctcgccag ggaacgtgac gttattaatc tggctactgc gggacatttc
    24721 acgcatgtga cgcgcaaaaa acgtctgatg ggcggcgata ctgcctggcg tactattcat
    24781 tgagcgatcg gcaatttttg cgatagcctg gagacgaaca cgccgcgcga ttttgtccac
    24841 aatgcgcagg tgttcaatca cctgatagtc gccgccctca acgtccagcg ttctcccgtc
    24901 agcccagtaa ataccgtcat aatccggata ccacatcggg acgctgtagc ggatggcttc
    24961 cagcgcctgc aaggtcgcaa gccctagcgg catatcgtca ctatcaacag gcaatacggt
    25021 gcccatgcca attaacggcc ctgtgcgtac tcgcgcgggg ctgtctgcga cggtcacggc
    25081 acggctacac agacgccccg ccaatacgcc cgcttcactg ccccacaaat ttggcaccag
    25141 ttgcaccgag ggcaccgcgt cgccacgctg taaatccgct aagcgggcga ggtacaccgt
    25201 ccacgattca cccgcttgca ggccactaac ggacaggatg aaccagaccc agcggccata
    25261 ttttgaaatc agcgtggtac gcaggctggc agcagcggca atcgtggatt ttgtcgcctc
    25321 cagcgtgacg acaacccctt ccacgctggc gacggcctgc gcgttttcaa cccgttgcgc
    25381 ccagattttg gcaacctcgg cggcgggctg ctcgtccagt tcgtcgtcag aaatagagac
    25441 aacaaacgcg ctccagttct gccctgcgtt cagccgcgca gcctcaacac aacgcttgag
    25501 cgttgagtct tcagcgccca gcaggctatc cagattgctc tgggtgttta ccggcgtgac
    25561 agggatcgca tccccgaccg cacggccaac gaacagcacc acgcgctcga tctcttttgt
    25621 ttcgccctga agctgattga gctgattgat tgtgatagta ggccaggtca tgttatcccc
    25681 cgctgtcctg tgcattgacg tcccagccaa acccgatggc ctgcaactga cgcgccaaaa
    25741 tcttgttaaa ttcgtcatca ctcacgccca aaaatacacg cgagggaata tctattttcc
    25801 aggtcgtttt tgttggctca ccacggagtt tttttatcaa taaccccgcc tgcgccatgc
    25861 tcaaggtgtc gagaatgtat ttgctactcg ctttgacata ccgattcccc ttgcgcattt
    25921 tgtaacccaa agcgcgtaat tttttagcct gcctgggcaa cgcgggccgg ttgcgctgat
    25981 cggggcgtgg cgcacggtcg gcactcattg aaaatgacgc accgccctgg tgtactgcgc
    26041 caatcaatcc ggctgaaacc ggcacctggc cgtttttgta ctgcccgccc tgaagataaa
    26101 ttctgactgc gtcgatctgc ggcatttcgc gcacatgtag cagcttcggc aactggcgca
    26161 acattttccc cttgccccgc tttcgcggtg cccacggctg gccgtctggg ctggtttggt
    26221 tacgctgatt gcgcttggcc gcgacaatga cccccagctt ggcaatgcgc cacagcagcc
    26281 gctggcgctt tttcggcggc agttccagtg atgccagctc caccaatttt tagttgtttg
    26341 aagtacaatg aagtctacta agcccgcaca gcacaagctc tgcgggcttt ttttcgtcta
    26401 ttgtcgtcca gtgagaattg ctgagaacta tcacttatgg caccctgaat gggacccaca
    26461 acggagggtc caaaaatcga gggtcccaaa atggcaaaaa tcgctaagaa gctcactgac
    26521 actgaaatca aaagcacgaa gccagccgat aaagaactca acttgtttga cggtgatggt
    26581 ttgatcctgc gaatcgctcc tctcacaaaa ggagggaaga agaattggta ttttagatat
    26641 gcggttccag tgagtaagaa aagaaccaaa atgagccttg ggacctatcc tcaccttaca
    26701 cttgcaagag ccagagcctt acgagatgca tacctttcct tgcttgccaa tggcattgat
    26761 ccccaagtcc ataacagcga taaagctaat gccttaaaga atgctactga acacactctc
    26821 caagccgtag caaggaaatg gttagatgag aaggtaaaga cctcaggtat ctcacaagac
    26881 catgcagaag acatctggcg aagcctggag agaaatatct ttcccggatt gggtaatgtt
    26941 cctgtcaatg agatccgccc caaactttta aagcaacatc ttgaccctat tgagcaacga
    27001 ggagtcctcg aaactttacg gcgaatcatt tcccgattaa atgaaatttt ccgttatgca
    27061 gcaactgagg aacttatcga atttaatccg gctgacaact tggggcaacg gttcagtaag
    27121 cctaaaaaac agaatatgcc agcattaccc ccttccgaac tcccccgctt cctggttgct
    27181 ctaaacaatg cttctatccg tttagaaaca aggctactga ttgagtggca acttctcaca
    27241 tgggttcgcc ctggtgaagc tgttcgcaca agatggactg atattgatat agaaaccagc
    27301 atgtggaaca taccatccga ttttatgaaa atgaagaagc cacataaggt cccattaagt
    27361 aaagaagctt tgcgaatatt ggattcaatg aaagccatca gtgggcacag agagtgggtt
    27421 ttccccagta tcaaagctcc actcaatcac atgcatgaac aaacagctaa tgcggccata
    27481 atccgtatgg gcttcggagg tgagcttgta gctcacggta tgcgatctat tgctagaacg
    27541 gctgctgaag agagcggtaa attcaggaca gaagtgcttg aagcggctct tgcacactcg
    27601 aagaaagatg aaataattgc ggcttacaat cgtgctgagt atctcgcaga tcgagccatt
    27661 ctcatgcaat ggtggagtga ctatgttcaa gctcaaaggc taaaagccat tgcagcttaa
    27721 ttatataaat ataattaatt accgtaaagg aggcaggaaa ttttagctat aaaaggatga
    27781 ctaagtatac atagccatcc tctactttta attcagcaaa tttgatataa atatccaaat
    27841 ctcaatcatc ttgcgtaatt ttaagtttaa ttttagcact tcttatctta gctatatgca
    27901 cataatcttt tccatatgtc tttcctctcc ataaaaacaa aagacaaaac aacccggtaa
    27961 tacaaacaag agtaaaataa aaaggattaa atggagagga gaaacggata tcaggtaaac
    28021 ttttaaatag tagaacaacc cataaaatgg tcacaaacaa gctaattaac tggtttattt
    28081 tagacaccga gaaagatgta gggcctgtta ataaatgctc acaatgttcc tgaaaccctt
    28141 tcggcatagg tcgggttaag acaaccttat ataaaggtcc gatagaagaa tcttccaaca
    28201 tatcgacatg attttcccaa ttttcttgcc agtgcttgct acctctgttt acacataacc
    28261 atcccgtaga aaatataatc ccaagacaac ataatataac ggaaagatca gttttattaa
    28321 cggaagaaga tgcctgcaat gtaataaaac cagcaaaagt agcagcaata aaagtccaaa
    28381 aatatgatgc ccttttccag taaagatcaa tttcgaactt tcgtatgtct aatgcgtagg
    28441 ctaatgcctt ttcatttttt tcaacatcat ccagaaaact tttcttgtag tcttcgccag
    28501 agaactcatt agtatgtttc acaatataac cttattcccc ttcacagggt tgttaaatca
    28561 acaataagaa tttgatatcc ctaggatatt taccaaaaat attacaacaa ctttaacacc
    28621 ttgattataa ataaacctaa aatctaaagc attacaaaaa aacttaaaga aaatgaacat
    28681 gctttttccg atatttgaat acttctacaa ttgccataag gaacacgaag tttagaaggt
    28741 tatgagaaaa gcaaactata atgtatgaaa aaaaataaaa aaggcatgat gaaaaatcac
    28801 catgccaaag acataatcat tatggcaaca tcattgatac ataatcaact ccaatccttg
    28861 caccatattg agaggctatg gcttgatatc gttcagcata accagtcctt agctgtgatt
    28921 taagtttaag actaacagga acattttgca cattaccatc catattactt agaaaaactg
    28981 cggagataac attcttttct gcaccatcga ccgctgcccc gtgatttaac accaccatat
    29041 aatcaacaac tggaatagct ttttcaccct cgaaaacaga tagatacttc cttatatttt
    29101 tatgcattac atagatgtac ttcgaatgct ctgcatacgg caacgcttta ttttgactgg
    29161 cattgaaaag ctcaagtact tttataattc tatgtggttt taatctatga tgatgaggtt
    29221 cattcccttg agttggaact aaatcacatg cagcggaaac acataaatac catttatctg
    29281 aatcagtatc aaaaaatata gtacccgtcg atatatgacc atcctcgaaa tttttggaag
    29341 aaagattcat attaagagcg tgatacattt gattgtatgc ttcatctgta gcaggaagat
    29401 tcatttttga agagcaatat tcaagtgttc taggaatccc gctacttgca aaatcatcag
    29461 aataactatc aaaaacagtt ttgataaaat catctaacga tctgttcttt tttagtcttt
    29521 ggtataattc ttctgataaa ttaccaaaaa caaaatcaat atttctgcgt ctaatatctg
    29581 gagagttaga tcttaaaatc tcatttagcc accctgcttg cccaaactga tcattagcca
    29641 aatgattaac aaaggacaaa gcttcagatt cgattgcatt ttgaatctca gattttatta
    29701 tctgataata agagggattc cactcaatta atgaatcatt cagttttctc caaattctgt
    29761 ccccatcatc atcatgatca ttatgaacct tatgaaacaa agtgacaaat atattaccag
    29821 tctgaatcca tttaacccca tcctgatcac ctaagataac attatcagtt attttgctct
    29881 gaataatatt atttttggct acggcatatt ctgcaatcat ttcagcaata aaattcttat
    29941 cgtcttgctc tactaaaatg gcatcaccat gaattagtgt tttaactctt cgacaacatt
    30001 ttctgtcttt aatgtatgag atagtttctg ctcttgtaag ggctttatca ccgttatggg
    30061 acaaattagg taataccgta tcttcccaat aacgctgaag caattcattt tctctctcaa
    30121 tgatcaattc attataatct gcagctccct tgagagttga ggcaatctcc atccatacag
    30181 tttccagatc ctctctagta tatataacaa ccatatttaa atgttcagag tcttttaatt
    30241 cttgcaacaa actcagtgtc ttatcagggg cattattatc caaatgataa tctactataa
    30301 tcaaatctga ttttctaata cgatcaacat caaaattaac tgaaccattg tcaatatcac
    30361 aaatcatatt ttttgcttgg aaaaaacttt caagtgtagc ggcccttttt gatgagtcaa
    30421 ttttttttgc atctagctgg atttctctgt taagtgcttg tatagattca gagtatgtta
    30481 aaaaatcgtc atcaatcatg acgacggaac gaattgcgtt atcgcagaaa gtctgctgga
    30541 cgagagaatt ataatttgcc actgtcatat tagtactcca ctccattgaa ctggatcacg
    30601 aaattagcac catcttttat taaataatta ccgtctacat ctggttccga gtaccatatt
    30661 ttatgatgtg caacagcaag attttctcga caaagatata aacccactcc atgtccgtta
    30721 gcccttttac tatagaatag ttcaaagagt cgaggaacat catcggtatc aattgctggg
    30781 ccagagtttg ctatgatgac taaggaattt acaaaatcaa tttttataag tctattgttt
    30841 gccaaactga cccaatacat cgcattattt acaatatttg taaaaacagg atatatgcgt
    30901 gaaggtatat cattgataga tatgttcttg aaatcatcac cgaattcaat cgtaatacgc
    30961 tgtctttcaa aacggtcacc aaaaaatttc aggatataat ccattatatt tttcccggta
    31021 attttttgcc ttgactgata tccagatatt ttcaaaggtg ataaaaatct gatttgttgt
    31081 gttaatgatc tatgtgcgtt cagtgctaat gtgaaaccgg gatgttcctt cgcggttgaa
    31141 ggcaaagaat ttagtcctcg tgtaaccata gagtccattt cttcaagctc gtgtgagagt
    31201 atttcgacac tgatacctaa ctgagccaga gcatttagac tcttagcttt atcctcaaaa
    31261 tactctctct cttcttctga tagcgaaaaa gcagagtcta aattcactcc ttcaaataac
    31321 ctttccaatc ctttatttat tgattgatat ttgaatgtta gtgagtcaat agtttcaata
    31381 taaatactat cgagtaaatt taaaacattc tcgatctcag tattattgtt aattgagtca
    31441 actattgata tagctttaga gtaatatata gctctatcac ttttaatttc ttctccccat
    31501 ttttttaaga gagcatttgt tttttcatca atgttattac taaactttgt taatctggca
    31561 ttaatgatcc cttgattttt atcaagatga tttttaccta ctaacgaagg ttctaactta
    31621 tttaactcag aatctaattt attaactatt aatttcatct ctaatatata cgcagagaat
    31681 tcattgtatt tatcacgata atttctatat ctctcctcat atacaccgat tttaggtggc
    31741 ttagttggag tttttatttc tgttcttaat gattctaaat tagcaaggtc agcatctatt
    31801 tcttttatat aattataatc atgcttattt tgactactat ctaatttagt cttcaatttt
    31861 tttacagctt caagcgaagc atctaaaacg ggagtttgcg tttttagtgc ctcagagaaa
    31921 ctcttttgtg tagatttacg ggcttgttgc tgtgctgatt ttcttaattc cttttcacgt
    31981 tttacttgct caagaagttc tttacgatct tcggactttc caccaaaaaa tctatccgct
    32041 aatgatgtta atagatctga aactaatgtt ttcaattctc tagcagcttg gtttcgaatg
    32101 aagccttccc tcccagattt atcctttagt tctttattat ttgattgtgt gatactgata
    32161 aatccgaaaa tcctgcggtt agaccaatag taccgcccag cattccatga ccttctttcc
    32221 tcgatctgaa agaaatcatt atctactcgt ccatacggca acactcttaa attatcccga
    32281 aataccataa gcccagcata tttttttgcc ttgaggtcaa aatgagtatg ctctcgctcg
    32341 gtgtgcgaag tattttgtgc caaaaattct aatgttccaa tttgaatttc aaatggtccg
    32401 actcctgaat cagaattaac acttatgctg gcaggaataa cgacttcgcc cttatcctcg
    32461 ccaaaagctt ttacgcgacc tctaaaccaa cccttctcat caacgcagcc cacaacagtg
    32521 tgctctaaag catcaaaatc acttttacta aatacatccg attgctttaa tatttgacga
    32581 tggtaaccat tggccttaat tgtatatatc tcataagaga atgatagatc gtctaaaata
    32641 taaggattta caaatgctct taaagtgtca accaagcttt gctcaacatc agataactct
    32701 gcattatcct tagctaaatc ccctgcattg gttaataatg acaaatctcg tccaagctcc
    32761 aataaaaaca gagcggttcc atgcttatca ccgtctatct tttcaacttt gattaagatt
    32821 tcttcccaag gaacgaagac attaggatca attttaaatt gatcacaaaa attaattatt
    32881 ttatcttggg tagtaataaa gccacttttt tcatttacag ctttctcatc ttctgagaat
    32941 ttttcccaag ctgattttgt gagaatatga ttaaaatgac gaacttcatc ttcatcttca
    33001 tctttgctgg gaaagtatac attcttctta agttcaatga gcaaatcaga caaaacatca
    33061 gatagagaat ctattttttc gaactctctg aatggaacag tgacatcgtc aaatgagaga
    33121 tacgggtttt cgaaaagcct ccaatcaatt agcaaggcaa cataattatt atcgattttc
    33181 ttagtgacaa gaaaagttac gggagataga aaagcagcag ataatcgccc aatccctttt
    33241 tctccttgag tttttcggat acttaatccg aacctctcat tttcttctaa ggtgttcttt
    33301 ctcgttttag attcggtacc aacaacaagc caattatcaa taatttgttg caaggacatt
    33361 ccgcaaccgt tatctataag ggctccgcaa gggtaatcgc catctattgt gtataatgcc
    33421 acatctcttg cataagcatc atatgcattt ttccaaagct cgcttacagc agttgggcaa
    33481 tctgcaatct gccccttacc gagatgttca attgtccttg ctctcgcttt aaagctaaga
    33541 gatctcatct gcatttttat catccctttg agagttattg attattattt caacacaaga
    33601 tttcagaaga attttcccca gatttacagg aacagcattt cccacctgtt tcccttggct
    33661 aatgatgcct ccagaaaaaa tgtaatcatc ggggaatgtt tgaaatctag ccgcctgcct
    33721 tacagtaatt ccatggttat cccacggatg taggaaacgg ccctttgaag gattaaaaca
    33781 accagtcgtt attgttgggc caggtaatga tagccttatc cgaccataaa catctttatg
    33841 accaacatag ccattcgaat gacaaggcaa tctaaaatca acatcttccc gactgccatt
    33901 gattggtgtc aaactaaatc tttcaatcat ataatcagca tgattcatat gaatattatt
    33961 tggatcactt ttattttctt taagcgtatt tttaaatttt aatttctgtg cgacatcttg
    34021 ccctaaaaca gcagtaattt tttcaataat agaagatgta ggtttttcaa agatttcaga
    34081 agcattaacc caataaggtt ttttatcttt gaaatgagtt ggggaaggtg gccaatcacc
    34141 ttcgctgata gaaatatcat ctctgagacc taagataaat acccgatttc tgttttgagg
    34201 aactccataa tcttttgcat tcaactttaa tggacccaag atattatatc cactattagc
    34261 ggcaagcctt ttaaagttgt ttaaatagtc tttatgtttt tcccaaagca aacctggcac
    34321 attttcaaca agaaacatct taggctgaaa aattttaaca aaatcatagt agcgaataag
    34381 taattcgttt cttggatcat taacaccagc atttcttatt ctatgagatg aaaaaccttg
    34441 gcaaggtggc ccaccaatga ttagatccaa ctctttttct ttcagttgta agctatccat
    34501 taactcatca ggtgaaatag tcataatatc tttgtttagt aattttatgc tattttctct
    34561 tttttgaatt aaattttttc tgtatgtatc acaagcatct ttatcaagtt ctattgcagc
    34621 taaaatttca atacccagat ccagagcggc taacgaaaag cctcccgcac ctgaaaaaag
    34681 atctatggcc ttgattttgt tcaatttatc cttcactctt ataagcaatc attttcttac
    34741 aactaatttt acagtaagcg ggcagttatc acaatccaaa ggtaacatca aggcagtttc
    34801 tggttttaag tcaccctgta gagaataaat acttaaactg aataaattcg gttcctcatg
    34861 ctaactttat ttcctttatt gaaaaatacc taaatattgc cttttgagtt agtttttcat
    34921 tatttctcgt actaaataaa ttttttttgt tcagatgacg aatgtattca atataaatta
    34981 tcgaaagctg gtgttgtgtt agcatattat aaaaggaaat atattgcatg ataaaaatag
    35041 atttatttaa atcaaacagt ttaagataat ttattatcga aactagtagt gcctcttcat
    35101 ttttttgttt acatagtttt tttatcattg ttaaagtaaa ctcgtctgat attaattcat
    35161 tgaaatgata ttcatcaaca ctataataaa ttggcacttt tattaaagac aaacttattt
    35221 catcaaactc caaatataaa tcatgcactt taaattcttt ttttatcttt aatatatcaa
    35281 ttaacatctc gttattatta taaaaataat tttttttagt tatgtacgac tcggaaagac
    35341 aaacgctatc aagtgagttg tagtataagt tgttgtttgc atcaatatat attttaggaa
    35401 acgcaaacaa ctttttattt ccgcagcaaa tttcttcaag ttttaaattg aaatgatgaa
    35461 agtccatata ttcccctctt ttaattactg ataatgcata ttttttgttt gtcaatatct
    35521 atgaatgatg ttaatattta ttttttgata tcagcattct taaatcatag ccaagagaga
    35581 tcttaatatg tcaaatcata gattttacat tgtaaagatt tgcaccccgg agtttttagt
    35641 atatatccct gaatttttaa aaattgaact gtcgcataat aatatttgcc cttctaactt
    35701 cattcctatt tttgtagtta ttgatcgagc caataaaatt gatcctattg tttgtgttac
    35761 agaagcatat gcattaaata aaaaaaagga gttgcagaaa gctcaccaag ctgaagatcc
    35821 tttattcaaa tttcctatat tagaaaaaaa gttaaagctt attaacgaag aagaagggtg
    35881 tcgtttaaga attatactgt taggcgaaga gtgtgaagaa gagttagaag agttgccaga
    35941 aggaaaatca accattacaa ttttcgacag gatattatat tcgacgtgct gttttttatt
    36001 aaaaatccat aaagaaataa atcgcaataa tagtgtaata ttatatttag aaactagcat
    36061 taactatctt aaagataagt ttgacaaaat cgcttcagac aaagatgaaa tttcaaactc
    36121 actcaattct ttggataaaa tatcaaatag taataaacca aacatataat aaacactaca
    36181 cctcctaagc aagagctaat ttatagaagc ggttgcaccg ttctataaag cccttgcttt
    36241 tcttgtttcc tttcagtcag acaataaaag aacacctaca caatcaaggt tgctgattga
    36301 caaactacta attaattgta taaatgatat atgaagcata cggattatgc ttatcaatca
    36361 gtaacatata aaatggagtt tatatgaaag agagtattta tacagataat atagatctat
    36421 ccaaaacttc ccgccgtggt ggttttaata aaagtaaaat tccttcagaa gcagtaagaa
    36481 gctattgtgt cagtgtccga ttgaatgttg aagaactgca actcctgaat ataaagcgag
    36541 gctcttataa aaaaggagag tggcttcgta tggcttccct tcaaaagttg cctcctgtta
    36601 taccaacgat taataccaaa gcctggaaag ctttaactga tatatcgcaa aagttaaatc
    36661 gaattgcgat ccatatcgat ggtaagagca aagatagcca gcttactcat acagagcttt
    36721 tcgctgtgaa gagacaactt gaagagcttc gtcacaactt gttaagaaca gatttttgga
    36781 gtatccctcg tgaagggtat gcggaagatc aagaggggta aaagcttcgc aggtgttgtt
    36841 caatatgcat tgaagccggg agcacatcat aaaagtgatc caatcgtcat tggcgggaac
    36901 atgttaagtg gctctgctct tgaactgatt tccgaattca atggcacaaa acagcttcgg
    36961 ccagatgttc agaaaccggt ttggcacaac tcgcttcgct tacctgatgg tgaatcacta
    37021 tcgaatgacc aatgggtaaa catagctgac gaatacatga agatgatggg gttcagtgat
    37081 acccatctcc gttgctatgt cttacataac gacgaaggcc agcatataca cattattgcc
    37141 agcagaatcg gcatagctgg tgggaagctc taccttggca ggaatgagaa cctcataagt
    37201 acccgcataa tcagtgaact cgaaatcgct cacggtctga cagtgaccaa gacagcactt
    37261 tccattacaa caaagcaaca gaagcgaaga aaggtttccc gcaatgaaca gatgctatca
    37321 gaacgaactg gtgttccctg ccccaagaag tcccttcaac agatcataga taaaagtttg
    37381 gcagattcac cggacctttt aactttcaca aagcgacttg aagaagcaga agtcggctgt
    37441 aaggccaaca ttgcttctac cggtaagatg aacggcttct cattcgaata cacaggcatc
    37501 gctttcaaag cttcgcaatt gggtaaaagc tactcttggg caaatctcag taatcggctt
    37561 aactacaacc cagaccatct agaagctctg cgaacgggta tagagactaa ggaagctctc
    37621 cctgtccctg tccctgtccc tgtccctgtc cctgtccctg tccctgtccc tgtccctgtc
    37681 cctgtccctg tccctgtccc tgtagaacag gttgccagtg agactgtgcg aagcgcaagc
    37741 ataggcgaaa aaatagctga aatcgaactg cgactcagaa aagacagacg aaacgaaatc
    37801 gtagaaaaga ttcttcaaaa gaatgcagcc aaacagcaaa agcatctcag gcttagtagc
    37861 tggcttccct ttttacaacg gctcatagag cttctccgaa gctacggtaa gagcattctt
    37921 cacaacaacc ctgcaagatt ctcaaaagtc tatgcaactc agcatctcag tcggaaaaga
    37981 aaaattcgtt tatagacagc tagttgcaaa cacctttcgt aacctaactc aattccccag
    38041 taataaattt gtgtttagtc aagaaaatat tgatcgttat tacagatcaa taatctagtt
    38101 atgatagacc atacctatca agtaacaatc attgatcggt acaagcaatt ttactaaagc
    38161 gagtcggtca tcgagaatcc ctacaaacac gcagtaaatc ttccaccctg gggttgctat
    38221 gaaaaacgaa acaataaagt gcccgttctg ctttacacaa agtcctcacg gtgtgcggat
    38281 ttgtaaaggc tgccatgcaa agatcgctta cggtgaaagc ccgctcagtg tggcattcct
    38341 gtttcaattc gttgcatttg gtctcgcgtg gttagcattt tcgtggactg gcagcactct
    38401 tgtatcagtc attacgtttt tcgtaagcat cattattctt atctataaaa ttaaaaaaac
    38461 gtatgcagac agagttgttt ttatacggtg aaattaattc acacaaccgc aaacctaaaa
    38521 tgagaaagta aatgaaccga tttataaagt catctttttt tattattgtc ttcctgcttt
    38581 ctggctgttc aacatcaggg aaccagaacc ttaaaaacga aacacctcaa agcctccaat
    38641 caaagatcat taaaaacaaa acaactaaga cggaattact cactaaatta ggtgagcctg
    38701 atacaagaac cacactcgat gacggaaatg agcagtggag atactttatg tataacaatc
    38761 agttcaatgc aacaactttc attccagttg tagggctgtt tactggcggt tcgcagactc
    38821 agtctaaaac tcttgaaata gattttaaag gcgaagttgt caacaaatgg acgttctcca
    38881 ctgacaataa caacaccaaa acgggcgttc ttaattaatt atttctggaa ataaaatgaa
    38941 aatatactca atccttacag ttatccttac tacatgtctt ctaactgcat gtaacagtga
    39001 accatcgcaa gacgatatat acaatgcttt caaaaatgtt gtagatagat caaatgcaag
    39061 tatgaaagct ctgaactcaa gtattcccga aaaagatctt ttaagaatag attatgttaa
    39121 gaaactaagt tgcacagaag aagcaaacaa tgtttacaac tgcattgtcg atgcttctat
    39181 cagccacatg aaacaaacaa agcctgttaa gcttgtgaaa gctgatggtg tctggaaaga
    39241 agttcagtag tagctatata aataagtctt tttgcccctg tttaggggct ttttattacc
    39301 tataatctga cggttcttat gcgaactgct tcatgggtta gctcgttctc gataacctta
    39361 acttcatatt gtgccctgac aatagcatag atttcctctg ctttttcttg attgttatct
    39421 atgtaattaa caagcgagtt tagttcccta ataacgcctt ctttgttatt taatcgttgt
    39481 aaaagattgc ttgtcagact tttgtaaact gagctaaaca tagccattat gttatcaata
    39541 ttacgattgg atttggaata aatcctttta gggtagaaat attttaaatg atagcccaca
    39601 aaaattaagt aaagctggta tgagaaactt ttatcatgtg gctgataacg ttttgatata
    39661 tatttatcaa ttataattat aagctgttct tccagtgttt ccattggaag gttgttttgt
    39721 ttgtccataa actgcatcct tgcaagttag ttttgtcttc ctgactatat ttacaaatac
    39781 catattaata tcacctgtca ataggtaaaa cctatcaaaa tattattttc ttgctctctg
    39841 tggaaattct tcttcaagaa tagaagccaa tatattatgc ctgtaagcat tttcgtgcat
    39901 tctttgaatc ataagcagta aattattatt ttcatatttt agtgccgaat tatcattttc
    39961 aagtcgttct attcttttcg ccgcaaggct caggctaccg ggtaacttcg tattttgacg
    40021 tttaaccaca ccagatcttt ttctggtcct atacgcaacg acaatctcac tatgctggct
    40081 taatgcttgc cgtgtaggta ctttacctaa aatttttttg caagccacgc ataaagaatc
    40141 ccaagtaaaa tcaggcttac tccaggtttc aataagttta acaatagctt ttatttcttt
    40201 atcataaaac tttcttgcca tataatctcc tcacattaat atgtattcaa tttccaatct
    40261 taaatcttta attttttcca gaatatattt tctttttctt ggatctgaat tttggatttt
    40321 taattctagt ttttcaaatt tatctttaat caaattcata ataatcgatt gttcattaaa
    40381 tgaagattct gtaatatttg tttcttcgta ggtgtttctg ttcaatagtt tccttgatag
    40441 ttctgataac tcgttgtgag acatatgatc atatactgaa ttctgcttaa cactccttct
    40501 cccagaccat tgggcaattt gtatctctga caatatgctt cgttgagcta tagtattaag
    40561 taaatgtcta atttgatggc tgcggaaaat tgaaacagga ccatcacagt taaaatgtat
    40621 attcctatga aatatgttat tcatattatc ggtgcgaaaa tccgctctaa aatactttga
    40681 agatgcctta attgttgtaa aaatatcagc acccttgata gagtctaata aattataatt
    40741 tatggagcat aaattagcat taatattatc agaattaaca ttctttctct ttatataaat
    40801 ccaaaatgct tttacactga ctgtgccatg ttttatctta gacaagaatt ttagattttc
    40861 ttgggagata tttaattgat ttataacaaa gccaagtttg tggagatctt caattgttaa
    40921 acaatcaaac gcacttttgt ttaatgactc gtataaatta ttttcccctg attttattaa
    40981 ccgagaaaca acccttgcat tccttgtaag ttttttcaat cgcatgatag cctttgaagc
    41041 tacagaaacc atacagtctg gaatccattt ggtattatat ccaaagccct tcagagaaag
    41101 aaatcgcaaa ccatatcttg atgtgccatt actatcttca actataactt cacagtcctc
    41161 ttccaaaagc ataatttcac taattcgaga tggagcacat aagagcaatg caaaaataga
    41221 agatgtaaat atgtcccttt cattagctgg attagagcta aatattttac caataaaatc
    41281 tatagccttt tcatcaggaa gttttttctg attggataaa ttccccatcg aatccattgt
    41341 gctatttgtg taagcatcat atgccttaaa tggatatgac catcgtgtaa tggattctgg
    41401 caacatttcg ttcttagaca taaaagaaca taatacccta agatctaaat atattttata
    41461 agaagtggat attgcaaaat tttcttgaac aatagtcata acttcatcta atactttatg
    41521 atctatactt gaaaccttaa cttctttatt tgttttaact atggcaattt ctaacatcct
    41581 aaataatctc agtactctga aagctacaga taaatcatga aagcactcat gccatacata
    41641 tgcttttgcg aactctgcaa tgttataatt cattaatttc ttattcttgt tccccattct
    41701 aaccttgatt ccgctaaaaa atgtaattcc gcctccccaa cttgaattat cccactcaaa
    41761 atttccaaaa tttttcgcat gagccttatt agcgataatg aagttattga tcattttatc
    41821 atggatttct ttcatcactt tatccttctt ttaaatgcta ttgatcatat cgtcgataga
    41881 attagttact aacgatattg ctgtattatc aaaagagtta gttttagatc caccgcagta
    41941 ttcttctatc aaatgcttca aagaatctaa ctcttgctga agctcttttc cctcaataaa
    42001 tttgttagcc agtggcttca ttagttcgtt tacagcttca ttaatcctct tgccattttc
    42061 cgctgtattt tctatataac tcataacaga attgattgaa gaatggtcca aaaaatttgc
    42121 tatcagtgaa ggactataac ccaattgtgc aaccttagtg cctaatgaat atctaaatct
    42181 gcgcgaattt atacacccca gataggcttg atattcattt attgaacgat ttatagtgtt
    42241 ccttattttt agtgttatgg cataggggtt aagttttaat ccaccacttt caatcatgtt
    42301 tagctcaaca catccttttt tgaatggata tgtatttata aaaattggta gttttctctt
    42361 ttgtttttca cttaaatcga tttttaatgt gtcattgacc agcgaattca cagcttcaac
    42421 gagatatgtc aattggctga aaagctcttc tggaatttgt aattttctaa actcttttct
    42481 atatccattt cgttgtttaa ttcttgggat attgagaaag tactctccat taaaagctaa
    42541 gagatcacca gcttcaagtt gagatatttg cataggtcgc cgcccggaat atgcaacaag
    42601 gaaggttagc agatagtttg acagacttat cttttcttcc ttataagcta tcgccacaga
    42661 atcgataatt acctttaatt gcgagtcact aaagggacct tttttgtaat catgtgtctt
    42721 tatagacttg tttgcatttg attttttaac tttaatattt tctaaaaata tgattacttc
    42781 tgacgaaaac aaagatgggt aaagaccact catcttcata aaaaaatatt tcactgtctc
    42841 tgcatgtgtg taatctaatg agctcacaac tttatagtaa tactttatgc aatctttaga
    42901 aaacaagcta tcattcgtat tacaggcctt aatgtaatgt tttactgcat aaaacatttt
    42961 cttagtataa ctggcactat aatttatagc gaaatatgcc aaagtggttt tgataggtat
    43021 atatgcactg atgaccattc ttaaagaatc aatgttcaat gttatacttt cacttatctt
    43081 ccacttggaa taagaaaagt tcactttgaa attaccatcc ttggtttcaa aaaccgaata
    43141 ttgactttct tgtagctttc ttagagtttg aaacattgga tttgtcctct actatgtttt
    43201 tgagtgggtt aataacagcc attatttttc ggctttcttg tgctataaat gcttggttat
    43261 agatatctga ggttgtacta ttcttcttcc accccattag ataatttctt actttctcat
    43321 aagtaatata atcctgagag ttcgaattca tgagtatcat ttctgagaat ttcacattcc
    43381 aggtatgtct tagcgaatgc cccacaatat cgctcaatac attactattt ttcctaattt
    43441 gttcgaaaat tttctgataa cctgaaatag tcaatgcatg acctaattga cctttactgc
    43501 tatgagtaac aagcagatag tcatgctccc ctgcatgaca ctgcttcctt ctgaaatcac
    43561 taatataatt ctgtattaac tcagtcaatt ctatactcaa tggtattttt ctttctaaag
    43621 ttttaaccaa tggttgcctt aatcgtggtt cgttttgatc atctggcctt cttactatgc
    43681 atagactttt gtggacatag tcaaaatcaa ccaacttaat attaagtagt tcccctcccc
    43741 taatacctgt ctctaacaaa atttcaatta ttagattatt tcgaaacctt acatgctccg
    43801 aaaatggatt aatcttagat ttaacactta ccatatcagt caaagttgta acctgctcat
    43861 ttgtcaatga tttgctttcg ctttcgatat tgtaattctt tccgttctct attcttggct
    43921 ttataaaatc aaatgctcga ctgattgttt cataacgaga agaatcaata ttattgatag
    43981 caatgttatc aaaaaaccat ttaacgtaat tttcaattgt cattatcttg aaataaaggg
    44041 ttcttttaga gacatgttgt tctttaagaa tgcttgtaac attctctaag tcgtttctgt
    44101 aagaaagggc attcattaac ccgaataaat atcctctgtt cgagacaagt ttttcgatat
    44161 catgatttac catatcaaaa acacccacat tcatgtcagc attatatctt tcaaataaaa
    44221 gcaaagcatt tgctattgct tccattgttg aaaatgaata gctatttgtt cgtgaaataa
    44281 cactcatata taagttagga taaaccaagg gtaatccgtt gctctcatta ataataatgc
    44341 aacttctgat actatcctta ttcttcaatc tttttatttt atatttcaaa gtcatatcac
    44401 ctctatttac atttaatcgt cagtgaaaat aaataaagca tataacataa gcaatttaca
    44461 aatatatttt cctgaattta acattaatcc cttttacaat gacgcatccc ggtcgaaaat
    44521 ttataatatc cctctagagg gatattatag ccctttcttt tcacttgaaa tagttaaccc
    44581 attattttaa aaggaattaa aggtgttttg taaatcaaaa agtaaatagc actatcattt
    44641 caacaatgca atttacaaaa tagtactaaa tatagattca ttcaaagaat ggttttcaac
    44701 ccaatctgat atcgaattat ccgtttcgat aaatttctaa tttcatcagg gcatttaatt
    44761 agcgagaacc atgtctcgta aacataaaac tgctcgaaaa tatcaagctc cgagatcgcg
    44821 tctaaaggtt gtctcaaatt tccgacaaga tactgactga gccagtaaat gatttcttta
    44881 ttaaaatcgc tattcggcaa atcataaatt gctccgtgtt cgaagatctt gccaaaaaga
    44941 tcctcgccta aattgcacat atggttttct tcattcataa attcttcgat attcataaaa
    45001 tgtctcccag tttaattaag caacattatt gcggcttgtt tcgattacag actgaatcca
    45061 ggtatcaatc tcactttcaa cgaaagctac tgcacgactt ccaattttga caggagcagg
    45121 aaacttgcca tcgttgatca gacgatagat ccatgctttt ccgtagccag ttcgttcgag
    45181 aacttctggt aggcgtatga ggcgggttgc ttgattcttc attttgtttt cccttgtcgt
    45241 tgcggtgaag tcactatacg aacacttggg gaaagaaagg agtgaagctc ctgaagcgga
    45301 ggttcttcgc tgctatgcag gatagttttc tcgaagttgg tgccgcacaa aacaggggaa
    45361 cttgagagta gctgaaattc ccctgtttta tggaaagtgg aaaaatggcc ggttcaaagt
    45421 aaaaatcgca aaaaaaagca tcatttacaa tgatgctttt ggtttttcat tttaaaaaca
    45481 aacagttata gataaaatac taatccgata gtttcattac atcagagact ttcatttgct
    45541 tcaaatggct atttttgttc atgaagtaat ggaattgtcg gataaagtca gttgtgcagg
    45601 atttaagagc caaaggcctg tcggtatctt tgatttgact ggactgcctc atttcgcttt
    45661 cttcgtcatc gtctgtatac agtagtctgg ataacctgtc gtcagagaca cggatttttt
    45721 taacggctgc ccacaccagg atatccagca taggtattac acgatagctg atgagtttct
    45781 tgatagttcc gtatccaaaa cgaacagatt ccaatgggtt ttcatcaata cccttaactt
    45841 tacgccattg cggtaatgca gctttaagcg actctgcaat ctcttcgtct gtgccacttg
    45901 ccaaatcaat ctcgaacatg actgttcgta taaactgatc gggcataatg tctgaaagtg
    45961 attcctctcg aagctctgcg tttatagaat aattgtcacc gtcatgccaa acaaaacctc
    46021 cgcgttgcat agcaataatg ctagtttcag caaggcgatc aagagttgtt agaaaaaaat
    46081 ggggaggttg aaaaagtttg ttggcaggag tcatgtatcc aagttgccct tctggaatca
    46141 aaatagggtt gccggtgaaa atctttgaga agtaactcat aagagttctg ctctcaaact
    46201 cttcccgata ctccttaaag aacagattcc gggcccataa ctcgtgatag aagtgtatca
    46261 atgagagatc ttcaaacttg cgatagttat ctatgttaag ccaagctttg atttcttttg
    46321 tatgctctgg tgaccagttg ttcaaaatcc attctccacc tatgctggta ctgccctacg
    46381 ggtacaattc agttatgctg aaaaagtacc gtatacacta atcggtggaa agcagatcct
    46441 gcttacgcag ttcaactccc agttggtagc tgaactgagg atttattatc ttttgataca
    46501 atttgccagt cagctaatcg tgagaactca taccattaag atttatggtt cctttttaga
    46561 accaccgata aaatagaaat agaaaattaa tataaaaatc aataatttga ataattaatc
    46621 acagggatgc cagcgcggca cgcaattgcc gtaactgtcg ctgcggcaac ccgccctgaa
    46681 cagctaccgc cattacgatt cactcagcgg tgcgccgtgg gcgtcggcgg catacagtgc
    46741 cccgcttaac gccgtccata gctcaggatc ggccagctcc cagcgttgcc cgccaaatgg
    46801 gatatcgccc gtttcgcttg gccggatgtt gatgctgtca gccagctcga cgacgatctc
    46861 caatggggag gacacttctt catcgaattc aatgtcaacg ctgggcggcg acagcaccag
    46921 ttcgtcatac agctcgttgc ggctatcagc cagccatgcc agcaccagtg cgtaaacctg
    46981 cgcaggcggg caaatccgat acgggaacga tccccagttc aatatcgcct ggtagcgaaa
    47041 tacccctatc cggcgctgtt ccagccccag cgctttgggc gcgggtatta actccgcatt
    47101 gtccagcgca ctttcaaact gctgcatagc ccgctcgggc aggttctgcg ttaaaaaggc
    47161 ggtcagactt tcaatctggc tcatatcaga tgcaccccaa cgcgcggata acgttgcatg
    47221 tttcgcagca caaaggcggc ttctgctaac agaatgtctc gcgtctcagc gctctcctgt
    47281 cctgggtgcg tttcgcgtcg gccaatgctg gcgaattcgc ccagtaaatc ggctttggcg
    47341 cgggcataaa tcgccttttt gtattgcgcg gtcagttgat tttcattccc tgcccgtgcg
    47401 cctggcacat caatggcctg ctcatgaccc cgttcacgcc agtaaatcac tacatcaccg
    47461 aggttatcat tcacctctgc aaccgccgcc aatagcgcct gtgccgccgt agacgcaggc
    47521 agatcgggcg gaatggtgcg tgagcgctga aactccgcca gattgagatc gggccagaac
    47581 gcgacaccgt taacgatggg ttcatcctga taatcaatcg gttttccgct aaaccccagg
    47641 gatggcacgg ccatgtcaca cctcattaat gcaagtaggg gaagcgggca gaccgagatc
    47701 cacggccttg aaaaccttac gagttttcaa cctccctcgc gcccgccccg gcttgcggta
    47761 gtcgttattt ttcggtcagc ccccgaatgc gggccgtaat ctttttacgg atggtgccca
    47821 cacccgcatg gcggttaaat ttttcagcct gctctaacag cgcatccgcc tgctcgagcg
    47881 tgtcaacgtc atcaaccgcc gttgcacgcg gctggccgtt ctcatcacgc agcaaataca
    47941 gccctgcgaa tttgaaccat ttcgcgttga tgtcctcatg cagccgccat ttatcacgaa
    48001 cgttgttaaa cgtccggctg aaatacggtt caatgctgtg accggcggcg gcttcaccgg
    48061 tagcccactc cagcaccgtg tcggcaacaa atgccggtaa cgtgcttttg aagttatccg
    48121 gcgtcgcctg gctctcgctg attgccgcgt cggcccagtc caatgccttg cccatttccc
    48181 ctgtgtcaaa caaccagatc acacagtaag ccagcgccgg attggcgaag cgggcatcac
    48241 cggcaagata ggcttcaacg ctcggcatcc agcgcgggag aagcacatcg cgtttcattt
    48301 cgatgcggtc ttccgtgcgc ggcaggctgc gcagtattgc gacatccttt tccagctcca
    48361 gcttttgcag atggaagcta accggcgatg cggccagcgc ttcacggtta tccagcgcct
    48421 tggcggcttt cacgctggcg cggtggcgct gacacgggga catggccatg tttattcacc
    48481 ctctccggtt gccagagtga ttttgtcgaa tgccgcgtaa agctcgtcat gctcgacgcc
    48541 ataaccttcc atgcgcaggt aattattttc aaagcgcttg cggtcatcgt tccactcggc
    48601 tttacgcttg cgtgtaccgc cctgggtata caagtgcagg ttgtccagcg tggtaacaac
    48661 gaggcgacct tccggcataa acggcggggt gtatacggta cgccctgcaa tctgacggcc
    48721 aataagctgg gccgcgacct tctcagtcgg gcgatcaatc cgattcatca tggttgtggc
    48781 gtcattaccg attaggtcgg cggacgcgag cacaatcagg cgcggatcat tgcggaacgg
    48841 ctcataaatg cagttatgca ccagatcggt gactgcggca tccagaccga taaagtcagc
    48901 accggcaccg ccaattgtca cgtcgtcaac gatgatttgc tcagcggagc gcgtcttaac
    48961 aatctggtgc cagccaatgt tgacgtcttc gccgttcgga ttggcatcgg gatcggtatc
    49021 gtccgcaacg ctggtaccgt tgaacgccac gcgcaacata tccagcgcaa atgactcgtt
    49081 actgaatgcc tgaatacgtt gaaaaaactc gtcttcgctg cccgcatttg cccagacaac
    49141 cagcagcgaa tacggcagat acgaacccga atccgtttca accagcttgt attcgttacc
    49201 ccccacgctc agcgggcgac tgaagcggcc gtctttctta cggccggtgt aaatacctgg
    49261 cttgcccgtg gtcacgacct gaccggttac ctgattgacg tccaacacgt tcggcaacag
    49321 gctcaggaat tcggaacttt gcagcagcgc actgcggagc tgggtttcct ttgggttcgt
    49381 cagcgagaaa aatcgcgacg tatccacctg gccgttagcg gttgccagcc ctgcggcata
    49441 tttgcgcagt agcgcttcgg cttttggggt taattgcata atctttttat tcctgaaaaa
    49501 aggagcagtt aaacaaactc aaacggttga ttaccgccgt ttggcgcact gtttggacga
    49561 cgcgtcccac cgtcttccat cgctgacaac ttggtcagaa cagtggtcag ttgcgtggtc
    49621 agatcgccca tcgcatcgtt agcaggcttg ctacgtgcgg aaaactcacg gcgacgactg
    49681 cgcgaacgag ggcgcttatc tggggtgacg ttgaacgctt tcatggcttt tgccagattg
    49741 gcttttgcca cggtgaactc cgccgctttg acttcgtctt ctgggttatc agcaacgtcc
    49801 tgcgccagca cggctacctc atcggcggca gcggcgatct cttcggcgat gtctgccact
    49861 gcttctgcgg cctgctccgg cgtgtcaacc gcgtcagcgt caccgctggc agcgtctttg
    49921 ccgtttttga ccaattccag caattgctga aggagggctt ttagctcttc cattttttgt
    49981 tcctcgccct cgtcgggctt atcagtgtta ggctctggtg ttggcgtaaa cgctttactg
    50041 gccgaaaata agcgcgacca gaaagactct tttttatccg gcgtctgtaa tttacccagg
    50101 ctgaacgttt caaggtttcc gcgctcagcg tccttttctt ctccagccaa aacgaatttg
    50161 agtttttccg ttcccagact ggccggaata tcggttacgg ccagcccgaa aagatattca
    50221 cgcccgctgc ccgcaaaatc agaaacaaac tcagcagagg taaaaagctt ttgccccatt
    50281 cgattggcat caattaaaaa ttgattcggc actaactggg catataattt cgtgacatcc
    50341 ccttccgttt ccactttcag cgcatcgact tcccccagat tgcaggtaaa ttcacgctca
    50401 ccaatgtcat actgtggatg gtgcggccaa atcatggcgg tataggtttt acgggtgtag
    50461 gtttctgccg catcaatcag ccattgcggt tcaatggtgc gaccgtccac agcctgtcca
    50521 gacgtggcaa tacataacca atcagtgcgg taatgagatt gcggcataat aaccttcatt
    50581 gaaaaagtaa ataacggtat ttcgtttgcg gtagtcagta ttactaattg attaattgtt
    50641 cgcgactgct ttatttctga tgtattcgga tataaacgct tatccgtttt tttccgatat
    50701 ttaatgataa tttcgtctga atattcccgt cataatatcc gcatggctaa atactccgat
    50761 gaaataaaag acgcggcacg cgccctatat attaaacgtt gggcgccgaa agatattgca
    50821 caggaattaa acctcccgcc gcgcaccatt tatcactggg ctgaaacagg ccagtgggct
    50881 tctctgctgc ctgttgaagc ggtcgagcat gtgatcgcca gacgcatcga tcagctaacg
    50941 gggcgcgaaa agaaaaccgc gctggagctg gaagaacttc gggatctgat tgctcaccac
    51001 gtcaagctaa tggcgcagca aaataagcac gccgaaaaaa tggcagaaat gcaggccaaa
    51061 aaagcggcct atgatggtga aggttattgc ctcagtgcag cgagcggaga gccaggggaa
    51121 agaaagcgcc ggtataagaa aaatgatgtt tccagcctga cgcctgaaat gctggatacc
    51181 tgggcacagg aacatctttt cgagtaccag ctacactgcc gcgatcacaa agatgaagac
    51241 tggcgcttca ttctgaaaag ccgccagatc ggcatgacct actatttcgc ctgggaagcg
    51301 tttgaagatg ctgtcgtcag cggtgacaat caggttttct tctcagcctc ccgcgcccag
    51361 tctgaaatct tccgtgagta tattgtccag atagcgcaga accattttgg catcacgttg
    51421 acgggtaaaa atatccgcct cagcaacggt gcaatcctgc gttttctgtc cacaaacgcc
    51481 agcaccgcgc agggttttaa cggtcatctg tatggtgacg aagtcttctg gatcccgaaa
    51541 ttcacgcgcc tgcatgaagt cgcaagcgcc atggcgacac ataacaaatt tagaacgacc
    51601 tacttttcaa cacccagcgc caaaacacat caggcgtatc cggtctggac tggcgatgag
    51661 tggcgcggtg acgatccgaa gcgtaaaggc attgagtttc cgaaagacag tgccatgcgc
    51721 gaggggatta tttgccctga tggcatctgg cgttatgtca ttacgatgga agacgctatc
    51781 gcgggcgggc tgggtgcgct cgttgacatc gatcgcctgc gcaataaata caacccgacc
    51841 gcgttcgcca tgctctacat gtgccagttc gttgacagca aagacgcggt attcaagttc
    51901 gccgctctgg ttggctgcga agtggataag gcaatctggg gtgactatga ccccaccgcc
    51961 gcacggccat tcggcaaccg cgaagtctgg gcaggctttg acccgtcccg ctctggtgat
    52021 aattccacgt ttgtaataat cgcgcccccg atccatgacg gtgagcgctt ccgcgttctg
    52081 gctatctggc aatggcaagg gcttaacttt agctggcagg ccgatcagat aaaacagctc
    52141 atgcgccgtt tcaacatcac gtatatcggg atcgacacaa ccggcatcgg taaaggggta
    52201 tatgacctag tcagcaagtt cgcgccccgt gaagccacgg ccattcttta cagcgttgaa
    52261 agtaaaaacc gcctggtcat gaagatgatc gacgttgtcg aacgtaaacg tattgaatgg
    52321 gcaaaagacg ctatcgacga aaccaataaa gagcgcgcgg aaatcccagc gtcatttatg
    52381 gctatccggc gcaccacgac caacagcggc aacgcactga cattcgttgc agaacgctcc
    52441 gatgcaaccg gccacgcgga tgtgttcttc gccatctcac acgccgttat taatgaacct
    52501 atcgatcacg aatttgaccg cccatcaacc tgggcattcg gggaagcagc atgacaaaga
    52561 gacagaataa gaaattcaag gccgcaacag gaaataacgt agagacgttc acgccagggc
    52621 gcggcagcgt gatcaccttt ggcgaaccgg aacccatcct gacaaccggc acggattacc
    52681 acaatatctg gtatgacaat gaatataacc actggcggtt acctatcgat cgcctggcgc
    52741 tgtcgcagtt gcctaacctc aatgcacagc acggcggcgt actgtatgca cggcgaaaca
    52801 tggtggcaag tggctacatc agcggcgggt taaccgctga ccaggtcgaa caaatggcgt
    52861 ttgattatct gctgttcggg gatgttgcta tcctgaagat ccgcaatgtt tttggggaag
    52921 tgatcgacct gctgccgctg ccctcgcttt acctgcgctg ccgtaaggag ggttctttcg
    52981 tcatccttca ggaagggcca gccctgattt atgaacctga agatatcgtc tttttcaaaa
    53041 tgtacgaccc gcgccagcag gtttacggcc tgccggatta catcggggga attcattccg
    53101 ccttgctcaa cagcgaagcg accattttcc gccgccgtta ctacaacaac ggggcgcaca
    53161 tgggcttcat tctttatacc agtgacccta atctgacgct ggaaatggaa aatgaaatta
    53221 agaccaagat cgcggagtca aaagggctag gcaacttccg caatatgttt attaacatcc
    53281 cgaaaggcaa ccccgagggg gttaaaatcc tgcccgttgg ggaggttagc gcaaaagatg
    53341 agtttgccaa catcaaaggg atcaccgcgc aggatatttt caccgctcat cgcttccccg
    53401 ctggcctcgc gggcattatt cccacaaacg gcgcagtaat gggcaaccct gacacggccc
    53461 gcacgacata ccgaaaggat gaagtcatcc cgctgcaacg aaaatttatg aatggcgtca
    53521 atacggacag cgagatccca gcgcatttac atctacagtt taacgttgaa acctcaccaa
    53581 tgaccgatga taagggcgaa aaatgagcgc aattaagtta aaatcatgtc cattgttagg
    53641 aatagcgtgc gggatggtga acatgcgaat ttttaaaatt aattgccctg aatgcggctc
    53701 accagccatc attcgtaagt ctgactggaa agacaagaaa ctagcggatt tatactgcgc
    53761 ctgtaccgaa gttgaatgcg gtcacacgtt tgtttttaac gcctcgtttt ctcacactct
    53821 tagtcccagt gggttaaccg gcaacaagct ggttaaattc ttaattgacc aactcaagcc
    53881 cgacgaaaaa caattcgctc tcaacttgct cagtggacat ggcacgtaaa gcaccgcatt
    53941 acgccttcta gagttttagg ctaatgcggg ctttctctct acatttaggc cgtctaattc
    54001 ttatgagcct tttttactcg ccttttttag agccaaaata taggtagggt gcagcgttcc
    54061 catcacaggt gagattggta gctgcccccc tttcatcggg gcaatatcaa accactcgtt
    54121 cgtataaggc aatgttacca gagtgctcat atcaaatttt gtatcgtaag cgagtccaga
    54181 gattgcaaaa ccagcatcat cacacctgag cacaaattca gtgtcgaaaa ttttatccgt
    54241 tttctggctt gtcccgtaga caaccatcac agcattatct tcttccgcca ccttcacaac
    54301 taacgcaggg cgtggcttag gccctggttt tccttttacc tgaggaaagt aacaccagac
    54361 gatatcacct ggctcaggga gagtgccgta tactgttgta ccacttatca ttatgtctcc
    54421 ttacaaaaga cttttagtaa atcgctcctc cggtatatcc gtagcagtag agaactctcg
    54481 gatagtttgg atttgagcga tggataatgc cccatcgtct ttctcgtaat gtggcaaaag
    54541 tgcatcggcc aatcttcgca atgccagatg agccaattcg gtttttgtca tgcctgttac
    54601 gtctatcaac gtctccaacg tgcgaccgct gatggcgctc agagaatctt tctctcttaa
    54661 tctaaggaca aaatctccgg tttttttaac gacgtttact gtcataattt tctactcctg
    54721 ttatttggtg gttaacctct ctttctttgt taagttcata ttcgcaaaag aaaaaatgcg
    54781 tttatattta ctaaatttcg cattggatag ttcctaagtt tgaagttaat ttgaagttaa
    54841 tttgaagtta atttgaagtt taagtttaag tttaagttta agtttaagtt taagtttaag
    54901 tttaagttta agtttaagtt taagtttaag tttaatttga gcccgttatc gagctgagtt
    54961 aaagatatca tattgatatc acgcgtcaag aaaaagatat caatatgata tctcttagta
    55021 tcacctatct gtttttatct atacctctgc gacgtagttt cagaccatgt cgcttcacat
    55081 aacactgcga tacgttgcag tagtgccgca gctttatcat gatattccgt gtctttttgc
    55141 ttcttcatcg gcgcttggta cagacagccg tcagcgctgg caacgtaggc atagcccgca
    55201 atcgtgatcg cgttgccggt ttccaaccgc cgcagctcac cggcgctgat atcccaaccc
    55261 agcgaacggg cgaaatcggc aacgctggtg cgccagtcgt ccgaccgctt actaacagtc
    55321 tgtttttcag tctctttatg gggctgagtt gtggacgagt gttctttatg tcgccgatcc
    55381 ggcggctgag atcgaagacg gttgagcaat ccacgccgtt ccgtgtcggt catgtgctca
    55441 aagtcggtaa tttctggctc tgacgtactg ccaatctctc tatcggcggg ttcggaaatg
    55501 cttatttttt catcgcccgt agagttattg acagaactcc aagcgtcgcc ggttggcgac
    55561 gtaacgacca acccacgccc agcgctatca ttagtgcctg cgtctgctac ttgttttttg
    55621 cggattttcc acttaacgag acgggtacag atacgcgata gctcacctaa gcgcggcgag
    55681 aaaacaccaa agattttttc tggcgtctcg ccgtagtcgt tttgctcgtc tgcatcctca
    55741 tacgcgatac gcacggtgta tagctcacgc gggattaaca cgccgccttg cttttcgatg
    55801 taggtagcga aacagcctgc gtccgcagag gctagtacgg catccattgc aggatcacca
    55861 agctgcgcgg caccacgctt gaaggttccg gcctctttct gcactgcggt aagctggttc
    55921 gccagcttac gtagttcgcg ccagacagtg accggcggca ggccgaacgg ctgaaactgc
    55981 cggatgttat gttgagacgc ccaagccatc gcaaaccgtg cggtttcgcg cagaggcttt
    56041 ccggtttcgt tatcacgctc accgtcaagt gcgtagccgt cgatgttttt actgatatat
    56101 ttggcaacat aggccgttgc actgcctttc ttgggatcga gccttttcgc tttaaagcgt
    56161 gcgccggtat tacggcccag ctccgcgcgg tctacagcga tgaaatattc acgaagaatt
    56221 tcagtgattt ctttccggtc ttctggcggc atgaatagca atacgtgcca gtgcggcgta
    56281 gcgtcgtgat gcggctctgc gacgcggaag ccatacggac gcaggccgcg ccggttcagt
    56341 ttcgacatgg ctttagccca tgtcttacat aaatagcgct gcccctgccg aggggatgac
    56401 gtatcccact tgggattctg atgaccactc tgaatagtgg cgtgataacg cgatgggcaa
    56461 gtgatagtaa gaaaaacacc ttcgtcactg cgcgatattg caaccatttc gacacccgcc
    56521 atgcgcgtca tgagttcgtg acggcgaata accggattgc tgacgcttgc gtaaaccata
    56581 ttttccagcg atgcgacgtt accgtcttca tcaaccagtt catgcgcctt aaagaattcg
    56641 cggtttttgc ggcgctgctc ctgccactga ttcagtgcat caatactgac gtaaggcatc
    56701 cgttttttat ggatcacgcc gatggcgcgg aactggtttt ctcgccattc gcagcgcaaa
    56761 cgccacaact tacgccccca ccagtcaggg ctgatgatgc gcagaatggc ggagcaaata
    56821 cgtttttttg attcgttatc gcaaatgatc acgccccagc acggcggcgt tacccgtagc
    56881 gccagcattt cataacccaa atgccagaaa agcgcctgga tctcatcatt ggtcatatcg
    56941 gcgggcaatg tgttgccgca ttcggtttca aacatttccg tgatgctggc cgcaatagca
    57001 tgaccggcgt taatcgcctc atgtttcgta aactctgcca aatgctgcca gcgtgcgcgc
    57061 cagtagctgg caagctctga cgtaaaaccg tcacgcacac cttgcttggc acgcacagca
    57121 tcaagacgca gcagggcttt tttcacggtt cccatgaaaa aggcgctgac gtgtcgcggc
    57181 tcgcggttgg cgcgcagcca ttctattttt ttccggtagg tatcgcggat aaaaaacggt
    57241 tgttcgagta agcgtgcttc aacaccttcc ggcgtttcca tccagttttg taatgccgct
    57301 tgatgctcgt cccgtacagc ttctgcgaac tggcggcgca ttgtcagtaa cgttgaatta
    57361 ggctcgaagt agtccagccg cgcgacggcc tgctcgaaat ccagatcgga gaaagcggcg
    57421 cgtgatacca gccgcttaag atgctgctcg acggctggat gcggctcagg ggtatttacg
    57481 acagaagaag taaaagattc agcgatcccc tgatacggcg agatcgctgg acgtggtgca
    57541 ttccacgggt aggcccactg ttcggacatt actcacaaac cccagcgtaa acgctgttgc
    57601 agaccatcgg atcgacgact tcgcccaata aatcgaactg tcgccccccc cctggttgtt
    57661 aatgcccaat ctctgtaggt gtggataccg tgagactcga cgctaataca ctcaatgcgg
    57721 cgctctgatt ttttgggatc gtttgttgag gggaagaatg ttgagttctg acgacgagaa
    57781 catgccgcaa caaggcgttc ccagcgcgct actcgctcaa cctcttcagg ccaacgacgg
    57841 aagatttctg caatctctga ctttctggca tggatgcacg gcatacagcc gacacggcta
    57901 cagccttgct cataaagtgg attaggcttg acgccatgcc gcctagctaa tgcgaaaaca
    57961 tcggcgtgtt tccagtgaag aatgggacga tagatgctca gacgagggcc aagatcaaag
    58021 ccgttttccc attctgacaa aagggcgcgc gacgcggatt cttcggcacg aacaccttgc
    58081 caagagacaa cttcaaaccc cgcatcaatg atcggttcaa caacttgtag ccggataggt
    58141 tcatgcttta actcagttga acaaaaacgg cgtttcgttg atggaaagcg acccttccac
    58201 atgcacagat caagaaatgg gatgccggtg ggatgcaggg tatctaacgc agtagcgata
    58261 atgtttgcgg cctgttcatc agtaaaacca cattctgaaa caagcgtgat aggccacttt
    58321 tcggcaatga attttctttt acctgcgatt tgccgagaaa aatcggcatg gacacgcctg
    58381 attttcccta gtttggattc cagataatcc aaatattcca tggtctgagg atgttcgtga
    58441 ccagtatcag caaaggcggg aatgtggcta acgccgttct ccacggctaa tagccattga
    58501 gcaaggctat ctttaccgcc tgagacgcta ataacattga ttgtgtcatc ataaaaacaa
    58561 cgtggatcaa tcatcagaat gcctctcaca gtggaatcgg gttttcttcg gattcccaat
    58621 agccggggag tacatcgcta tcggattcat ctccgcagcc gtcgcaggtt ttcagcacgc
    58681 cgatcacttc ttttgcagca ccacgcgtga tgccgcttgc actgatagag cgctgaacgg
    58741 cgatttcatg gaattgatag tgctgataaa tctcgcgcgt agcgggggtg tcactatttg
    58801 agataacaac cggcacgccg cgtgaaaggt ttacgctcaa cagcaccgcc gctaaatctc
    58861 gatgatggtc gtgggtaaaa gaagcatggt gatattgcgt aaaattggcc gtgtcgctgg
    58921 ctggcaaata gggcgggtcg caatagataa cggtactttt gtttatccct ttgattgtca
    58981 gagtcttgcg gaaatctgcc acggaaaaaa cggttttagt gtcgttggct ttttcagcaa
    59041 acaaccgtat ttcatgctca ggaaagtatg gtttacggta cttgccaaat gggatattga
    59101 aatcccctgc attgttataa cgacatagcc cgttaaagcc atgccgattc agatataaaa
    59161 atagcgcggc tgtaactgtg ctggggtttg atttttgata gttaaagctc agccgattac
    59221 cgttatacgc gtcggcatta ttgccaccat taaatagatc atgcgcagtg gctattaacc
    59281 gctctgtatc ataagcggcg cactgatata aattaatcag atcggggttg atatcagcca
    59341 gcacatagct gggatagtcg gtatttagga acacagacgc accgccaacg aacggctcta
    59401 taagacaatc ccctttcggt agaagcggga gcaaatcggg caggacgcgg gttttacccc
    59461 ccgcccattt gatgaacggg cggatcatac aatgatctca tgcgacgaat gctcaaagcg
    59521 ttccgcctct ttgcgcagta gttcgataac ctctgcggtg gaaaactctt tttgctgggc
    59581 atggatagac agcgcagcca ggcgcaagga aaaccctaag tgctggtctt tcttttcttc
    59641 ctgacgtgct ttttttagca gctcaacgag tgcgtcattt cctgctacct gcatcgcttt
    59701 gcgttctgaa tttctcatcg tgatttcctt tttttaggga atagaaagcc cggcgggttt
    59761 acgcctttaa aaacgggagt tattacggtt aaagaattaa atgcttgggg aataaactca
    59821 caactgcttt aagtttattc atcgccttaa tcagctttgc tttttcttca gttgtcagtt
    59881 cattaaattt caggtgatgc cgtcctttat caatatctgc taattcaaat atcgctgata
    59941 gcacgcgcat attatctgaa tgtgttgatt tcctatcgtt acggtttccg tcataaaatc
    60001 tttcatcgcg cagatcatca ataaagcggc acatatcttt ttcactgttt gtgttgaagt
    60061 gttttcccct cagcattgcg atgtggttca gcccgtcagt tctggccgcg atactcagcg
    60121 gaacggcgcg ggcggcttca gtattagcca tgacgattac gccgcgatac ccatcaagcg
    60181 ggcgaaccag cggcgctttt gcttaggcgc tggcatatat ggctttttgc tccacggcgc
    60241 aaaataagcc tgcgcgggag ttggctgaaa acgctggccg tttggtaatt ccagccagcc
    60301 tttattttct tgggggtatg gtgatttttc ttttaataaa cgtgctgtgc taatcatgct
    60361 gaattcctca tgttgtgcag ttcgttgata taagaagtcg cttgccctaa tgcatcaaac
    60421 ataccgaatg attgatcgcc ttgactcacg cgataacgtg taatcggatt agttgctgtt
    60481 ctggggcagc gagtaataga gaagccgcga taaacactgg tatgttcgct gactttaatt
    60541 aattcaccgc tcatgcagac atcccacgat ggcggcgggt cggtttactg gcactaattc
    60601 tatctttcca gccatgccat tctggcggtg cggtttcaac caactgttta gcgtatttat
    60661 cccactccag gcgatgaatc cacagctcag cattaccacc tggctttagc gggtcagcca
    60721 tataaaaggc tggtaatttc cccgctttag ccatggcaac aatagcggat gtcgttttac
    60781 cgacatacag agcaaacccc tcttttgaca agagatcggc aggcttctct gacaatcgaa
    60841 tctgacgacg cggcgtagca tctgccgtct cgtccccttc cccgtcaaca atggttttag
    60901 cctcgtcttg catttgatat cctccgactt ggttcccgca tcattaacta gcgccactta
    60961 gtgctagtta atgcttattg cggggttcta cttaccgata aaataggtga tgtgcgatta
    61021 tatgtcaata agccagtcag agaagctcaa actaattaga gattcagaac gtctaaaatc
    61081 aaaggaagtt gctgatttag taggacttaa ttactcaaca tatcatgggt atgaagtcgg
    61141 aaaggctaaa atgtcaatgg aagcaggaat ggtgtttttt aaacacccac ggtttcgcaa
    61201 gtaccgtgac tggttcatgt ttgatgaaac taacccagaa gctgggcaga tagcaccggc
    61261 cctcgcacac attgggcaag acgaaacaaa atctcaccaa tccgaccaca aaattggcta
    61321 aatatttact tttattacct ttttgatatt gattttcaag atgagagctt catcggagag
    61381 ttatcttatg tcgattaaga aacttgatga tggtcgttat gaagtggacg ttaggccgca
    61441 gggtgcagag ggaaaacgca ttcggcgaaa atttaataca aaaggcgaag ctcagatttt
    61501 tgagcgtcac attttggtca actaccacaa taaagattgg gtagaaaaac cagcagaccg
    61561 ccgaaaactg actgaattac tatccctttg gtggatttac cacggtaaaa gccacaatcg
    61621 gggagaaatt gagaaaggaa gattgaacgc tattattgtg aaactggctg aggtgggcgt
    61681 aatccgtgca gaccagctaa cgaaaaaagc aattctggat taccgcgtaa acaggttgaa
    61741 tgaaggttta aaaccatcaa gtgttaatcg gcatcatgcc attttaagcg gaatgtttac
    61801 gaagctcatt gaagccgatg agtatcactc ccagcatccg tttaaagatg tgaagcagtt
    61861 gaaagaacag caagccgaaa tggcgttttt gactgccgga gaaatagaag acttacttca
    61921 gttgctggat ggtgataacc gcaacgccgt tctggtttgc ctggcaacag gaggacgatg
    61981 gggagaagtc gccaatctta aatgtgaaca cattatcaac aatatgctca cgtttatgaa
    62041 aaccaaaaat gggaaacgta gaaccattcc catatctccg gcgttgacga cacaaataaa
    62101 gcacgctaaa acgggtttcg tatgtcatcc aaattacgac gcagtaagaa acacattacg
    62161 tgcaatgaaa cctgatttac cagatgggca agcactgcat gtgttccggc acacattcgc
    62221 cacgcatttt atgatgaatg ggggtaatat tattacactg caacgaattt tagggcattc
    62281 cacgatccag caaacgatgg tctatgcaca ctttgcgcca gacttcttac aagatgcggt
    62341 gttgctaaac ccactcaacg gagtgtccat ataatgtcca tgaatcagca ccacttagct
    62401 ctaattggta tcatatgaat aactcaaaca cttgtttttc aacagaaaca cccgatgtag
    62461 ctgaagctgt aaagtcagta atcggtcgca tccactcttt tgaatcctgt ggcaccgtcg
    62521 atggcccagg catccgtttc attatcttct ttcagggctg tctgatgcgc tgcctgtatt
    62581 gccataaccg tgatacctgg gatacgcacg gcggcaaaga agtgacggtt gaagaactca
    62641 tgaaagaagt cgtgacctat cgccatttta tgaatgcatc cggcggcggt gtaaccgcat
    62701 caggcggcga ggccattctg caagccgaat ttgtacgcga ttggttccgt gcttgtaagg
    62761 atgaaggcat taacacctgt ttggacacca atggatttgt acgccgctac gatcccgtca
    62821 ttgacgagct gttggacgtc agcgatttag tgatgctcga cctgaagcaa atgaacgatg
    62881 atatccatca gaatttagtt ggcgtatcga atcaccgcac tctggatttc gctcgctatc
    62941 tggcaaaacg caaccagcgc acttggatac gttatgtggt ggtacccggc tggtctgatg
    63001 acgatgaatc cacgcacaag ctgggcgaat tcaccaaaga tatgacgaac atcgagaaaa
    63061 ttgagcttct cccgtaccat gagcttggta aacacaagtg ggtagcgatg ggggaagagt
    63121 acaaattaga cggtgttaaa ccgccgaaag ccgatacgat ggatcgcgtt aaatcgattc
    63181 tggaaagcta cggtcacaag gtaatctact aatctctgac gctttctgaa aaaatagcgc
    63241 gctcactcag cgcgctattt tcatttcagc ggatcaacat cgcgactgat cttgacccgc
    63301 tacattgtag acaagtaccg agttaagcca gattccctgc cgctttgatt ttcacctgta
    63361 ctgcattccc cggcagatag gctagcggaa tttcctgata atcgatgatt tcaacgctgc
    63421 cagacatggc tcccgtctct tccgcaagac aaatagtttg ctgctgtaat tcgcttttta
    63481 tcttttcacg atcgttatcc ggcattttaa ccacgcgctc gatctgtgcc cccactttcc
    63541 ctagtgccac acccaccgca tttgccgcat caaaattctg cggacgcatg acctgactga
    63601 caccggataa aacgtcaggc agtaaaatac tgccaccgcc aacaagcacg gcaggaatgg
    63661 ccgcactcga cgatttaatc cgatcgatag cactttccac tttatcaatc atctgacgat
    63721 aagcctccag acaaagtgct ttatctagct caggcagtgg atgagaaagc gaggatgtcc
    63781 atcgctcagg ctgaagttgc agcatgatat cgttgagcgt taatgtctcc ccgccaaaac
    63841 tgacgctctg ctcaagaaga cgatagccga cgctgtcagg cccaagggtg agtgttccgt
    63901 tctgagactg ccgaacgcaa gtcccaccac caatgccgat agaaataata tccggcatcc
    63961 tgaaattcgt ccgcacatcg cccacttcaa cggcaattgc cgattcacgc gggaagccat
    64021 taactaatac gccaatatct gtcgtcgtac cgccaacatc aataatcagc gcattatcca
    64081 atcccgaaag gtggcacgca ccgcgaatag agttcgttgg cccacaggcc atcgtcagaa
    64141 tgggatattg cttcaccata ctttcggaca tcaatgtgcc gtcattttgc ccgaagaatg
    64201 gcgtagcctt gattccgtgc cgaactagcg cttgtataaa gccgttaaca aaacggtttg
    64261 cggtactttg cagcgacgca ttcaggatcg tcgcgttttc tctttccagc aatcccgtgc
    64321 tgcctattcg gtgggataat gacagggaaa catcaggcaa tgccgcattc acccattggg
    64381 caacctgcaa ttcctgatca ttatttactg gggaaaatac gccacagata gcaacgctat
    64441 ccacatgacc acgcatcttg tcacagaccg ccagcacttc attcaatagt acgggatgga
    64501 tctcccgacc atcaaattca tagccgccat gaagctggta gaaatgctca cctaatgtct
    64561 tttgccactc gtcatcccag ccaaacagcg gcgggacgct atcactgctt ggcagactca
    64621 gacgcagtaa tccgacgcga tccagccctt ttcgctcaac aattgcattg gtacattggg
    64681 ttgtgcctaa catcgcatag caaatatgct gcggctcgat gcctgattgc gccaataccg
    64741 cagcaatcac gcgctcaatg ccgctataga tatccatact cgtaggaaat ttagccgtcg
    64801 caatacagcg cagatcagca tctaaaattg ctgcatccgt gtttgtgcct ccgacatcaa
    64861 tcccgagtcg gtaatcattt ttatgtaaca tcgggaaagc ctcagcggtt tgcaagctgt
    64921 tctattggta cataccgcac cggatagccg aaatactccg gccccgcgac ctcaatccct
    64981 tttggcgttc gccatttgtc attgcacgga taggcaatga tatcgactcg ctgcccataa
    65041 cgtaaatgct ccgtaataat cggacgtccc gtttcactgt ctaatatcga gattaaatca
    65101 ggtacaactg ccagcagatt atcctgcgta gggtttgtcg tctgtgacga gcgataagcc
    65161 agcaagagtt cattctggaa aagtaccgta aacgattcgc ctttatcgtt gcccatacca
    65221 tccagcacca ctttacctcg agcaaaacca ccggttgtgc gccgatcaac atcgataatc
    65281 ttacccgatg caatgacgtg accattaagc acagtgagta gagactgcac aggatcactg
    65341 cccgactgat gagcctcacg cagcgttttt ccgatatttt gcgctagggt aagcgttcct
    65401 tttatggcgc tacgtttgag ctcgtgtcca cggagcggat aatcacacat cgcacaggcg
    65461 gcacccatct gctctgtaat ggctctggct aaccgctcag accacacacc atcaatagga
    65521 ttaaggataa ccgagttacc tttctcatca gctagcgtgt tcggtgccga agataagcca
    65581 tcgagaaaaa aggtcaccat ctgcgcttcg gggaatgcac gccccattgc atcacaatcg
    65641 ataaccggca gccctttttt agccgcaaca acaaatggga tcagagagtt aataccaccg
    65701 acttcgattg aaaatgttcc cgaagctgat tccgctagca ctgtttccat cgtgtcaaat
    65761 gccaaaataa tctggcgctg tgaaataatt ttctccacag aaaccgtcgg cgcacccata
    65821 gtgctacatg gaacaaaaag tgagtcatct tcgatatcat cgagattcat cagaacaata
    65881 ggctgggtat tacgtaatgc attcttggca attagcgagc caagataggg gtctcccccg
    65941 ccccctgtgc cgagaaccga cgctcccaga gcaatatcat ctattgtttc agaatcaata
    66001 taacgagtca ttatttgtcc agacagacga agaaccccta tttaaaaata ggggttcaag
    66061 caattacatt cccactcgtg ggaatatctt acgcaaagcg acatataccg ccatactcac
    66121 cattattcca tctaaagcag aaatagagct aatagtaaga acattgaaaa aatctgtcga
    66181 tgtcaagagg ctaaccaaac ttccgcatat ccacgctgca gcggccccaa tgttcagatt
    66241 cttcggttct gatatatcga tctttgatgg tgataagtca aaaaagtaat attcagccag
    66301 atatacacca gcgattggtg aaactatcac ccccaataat gagagaaatt gggtaaaatt
    66361 attaatcatc ccgttgtagg cgaaaaataa tccgataaaa gccatcaaaa tcactagcgt
    66421 aggtcgtgac aatgcccgga taaccacaga gagccctaac gatgcggaga ttagatttga
    66481 gctatttgtt gtccattgag caaagattaa aatcacaatg gctgacatgc ccagcccaat
    66541 actaaagaat atttcgacaa gatcatcgct accgaccaga tgggtcagta aaagcgcaac
    66601 taagattgtc gcgctattac cgaagcaaaa gcctaatcct gcccctaaga tggcgtcttt
    66661 acgtgttttg gcgtagcgcg caatatcagg ggacataata ctagccgcaa ctatccagat
    66721 agagacaaca taagagattg cgcttcccat actaatggga tttttaatag ttattgttgg
    66781 tggtgtagag tgatcaactg cggccaaata aatccctgtt actatcagga tcagcattaa
    66841 aggaacgcta aacatgctga gccgtcctaa tgatctgact ccccaaatag ctgttaatgc
    66901 catcagtatc atgccaaata gtaagatagg aaaacggccg ggttcaaaat gataatgaag
    66961 taatgccttt tgtagcatgg caccaaagaa atcaagctgg aaagcgaacc accccactaa
    67021 agaaaccgca gagaatatgc cgataagttt gccgccaaat ttgccaaaca ccgagatact
    67081 taacaacgtc gtcgatagtc cacagccata acccacatta gcgcataatg ctgcaagcac
    67141 accgagcaaa gcagaaccaa taagcgtagc actgacggcc tgagaaaatg gtaacccacc
    67201 gctcaaaaaa gtaccaagga acaaacctga aatatcaatt ccgatcgcca accatattaa
    67261 cgtaattaca taccagcgtt ttctggcttc ggcagggaca ggttcgtatt cgtaatcata
    67321 gatttgccgc tcctgttgtt gtttttcagg cacagcattc ccttgagaca taactcctcc
    67381 attgaataag cagcaaataa ttattgtatc gttgtgatat tttatagagg ttgtctggcg
    67441 acgtatagaa caatggtgtt gtcagcaagc taacaacacc attgtgctta tgagagaccc
    67501 tgatgtgacg cataaaacca cgctttttcg tggtaaccac attactatgc ggcttaacag
    67561 taagataaat gggattcata tcgattaata cagatatatt ttgatgttaa cattcagata
    67621 tgtaatgtat gcgaaggaaa tgctatgcgc ttagataaac tggagattcg ctggttaaag
    67681 cttttttgta aaatcgttga aaaacaagga attaccaacg cacaaaccgt aactggatta
    67741 agtcaacccg tcctaagcca ctacctgtct cgactcgagg atacacttgg gcttgttttg
    67801 tgtgaacgtg gtcgcggggg ttttgcctta acaacggaag gtgaagtggt ctatcaggaa
    67861 gcaaaatctg tcatttccac gctcgatgat ttcgctaaca gactagcccg tatcaaacat
    67921 cagcttatag gtaaagtaaa actaggctgc ttggataata tcgccacaca tcccaacaac
    67981 gttgtatcac aagctatatc ccatctttat gaccaaagcc cggaagtcaa cgtcgaaatc
    68041 gaaattatgg aataccttcc gctcatggaa cggctaaaaa acgggcatct cgatgttgtt
    68101 ctaagcgccc tacccgatga catccccgca gacattttct atcagcccgt ctttgttgaa
    68161 catagctact tttattctct agcagaaaat gctgagatga tcgaacgtga atggcttgag
    68221 ggtgaattaa atcctcgcag gctgttaatt ggtgggcatg ccgtcaacga gatatctaaa
    68281 cagctaggtt ctgtatcaaa gcaaggttac caccagacag cttggcatct agaaggaagc
    68341 ttgttacttc tgctcgcggg aacccatatt ggttttcttc ccgaccatta tgcagcatcg
    68401 tgggtggaaa aagggaagct tgcggcagtt gctccagatc gtttaaagct aaccagcata
    68461 ttttatctgg tacgaaatgc aaaacaacgc cttagcccgg tagccgaggc gctgtggaac
    68521 aatatggtag acgcgggaca aagctcgttg gccagccttg ataccgctaa ctcaggcagc
    68581 agctaatggc gttggatgat gatcggcttt tctgagcaat atcatcaggt agatcatcgc
    68641 taccgcggca attagtacga acagtaatcg atcagaataa ttctgcatca acaccgcagc
    68701 aacgcttggc ccgcaaagac tgccaagcgt gtagctaagg agtaacgcct gattcatcgc
    68761 caccaactct tcaggacgca ccttctcaca tgcccacgac atagcgaccg ggtatagcgt
    68821 aaaccctgcg catcccaata aaaatagcga cggtgccatg gcatagtgac taatgcttag
    68881 catggcaaca cagccaataa tcaccacaaa gactaacacc cgaagaacca acaaccgacc
    68941 atagcggtca gccatacgcc caacaggcca ttgcccgaca atacctgagc taatcagcag
    69001 cgccatccag tacccaacct gcgcatcatt cattccttga tgggagaggt acagcggcat
    69061 caggccatac agcgatccta aaattgcgcc ggaaataata cagccgtgta ttcctagacg
    69121 cgcactgcga tacctcagca ttttccacat attgacatgc ttttcgtgct gttcgggcgg
    69181 agtaggaaga tgagtacaca acagaggtaa tacagccaaa gtaactaacg cgaccatcca
    69241 cggcagcacg ctcaataatg atgtaggcaa cacgccaagc aatagctgtc caatcacgct
    69301 accgaggtaa taggcaatca tataagcagc cagcagttgt cctctctgcg tcgacgttcc
    69361 actacataac aaggcgcttt caaccacaac ccagatcaat gcgcaaccta tccctgccaa
    69421 gaagcgccag aataaccaac tgccgatatc cgcagaaata ccgaggccaa cgatcgcgat
    69481 gccaaataat aaagccgcaa aataatagct gcggttgaaa ccataaagtt tgattaattt
    69541 accggctaat agcgttccaa ccagattgcc accgaaatag gaagaaccaa cgaggccaac
    69601 ctgccagaca ggaagagact gataacttag ccaaagtggg accaacgtat ttaatactgc
    69661 aatacaaacc gtcagcagca gaagtccaca gagcaataac agcactgggc gggaataagc
    69721 agacatagcg agtgaataac caaacaaccg gagaagagtg agcgcatcat gccattgcgt
    69781 atataaaagt caatccgagc aaaaagtgct aaaacgcctt tctcaaattg tggattgaaa
    69841 gaattaatca atactcgctg aagggtcgtc acccttgaaa gcagaaggtt agtatttgat
    69901 tgattttaaa acattttaat cttaaaagtt aagtagcacg ggcggcatga tatagataaa
    69961 ttatttttac gataaaaaaa tattaccgaa catgagacgt aaaaaaagcg cccttaggcg
    70021 cttaattcaa atagcagcga ttagccaata aattccagcc cgcccatata ggggcgcagt
    70081 acttcaggaa tttcaatgcg gccatcggcc tgctgatagt tttccagaac ggccaccagt
    70141 gtccggccaa ccgccagacc agaaccgttc aacgtgtgaa ccagtcgagt cttcttatcg
    70201 gacttgctgc gacagcgggc ctgcatacgg cgcgcctgga aatcccacat gtttgagcag
    70261 gaagaaattt cacgatacgt gtcctgcgct ggcaaccaaa cttccagatc gtaagttttg
    70321 gtggagccaa agcccatgtc gccagtgcac aacaatacct tacgataagg taatttaagc
    70381 agttgcagca ccgtttcggc gtgggtcgtc aactcttcca gcgcctgcat ggaatcctca
    70441 ggacggacga tttgtaccag ttcaaccttg tcaaactggt gcatacgaat caacccacgc
    70501 gtatcacgac catacgaacc cgcttctgaa cggaagcaag gtgtgtgtgc ggtcattttc
    70561 aacggtaaag attcttcatc cagaatttcg tcacgtacta gattggtcag cgggacttca
    70621 gcagtcggga tcagcgcgta ttggctgctt tctgcttctt cgcttaaggg attggtgtgg
    70681 aacaggtctt caccaaactt aggcaactgg cccgtaccat ataacgtggc gtggtttacc
    70741 agataaggca catacgcttc ctgataaccg tgctgttgtg tatgcaaatc cagcatgaac
    70801 tgggcaagcg cacggtgcag acgagcaatc tgtcctttca tcacgacaaa acgcgcaccg
    70861 gttaatttca ccgcagcggc aaaatccagt ccgccagcca tctcgccgag ttcaacatga
    70921 tcgcgcacgg cgaaatcata cttacgcggc tcaccccagc gggtaacttc tttgttctgt
    70981 gattcatctt tcccaagcgg cacggagtcg tccggcaggt tcgggatcgt taacgccaga
    71041 tcgcgaatct cattctgcaa ctgatccagc tctgctttcg cagtatccag cttttcgcct
    71101 aatgtattaa cttcacgacg caaaggctcg atatcctcac cgcgtgcttt cgctgcacca
    71161 atctctttcg atcgggagtt acgctctgct tgcaggcttt cggtttctac ctgcaatact
    71221 ttacgacgtt cttcctgctt acgcagggtc tcaacatcca gcttaaagcc tctgcgagcc
    71281 agtaactttt cggcgactgc gtctagctca ttacgcagta aattgggatc gagcatgcta
    71341 atcctgtgct tatgattatc aaatgaaatg gtggcgtaca cggcgcgcta cgcggccggc
    71401 ttcagaaaat accttaataa ccttaccgca acgcttagtt caacggtagc gttttgtcgg
    71461 gctattttga tcctgagtag caagccaggc gagcttttca ccaattttgc cctcaaggcc
    71521 acgtgaggta ggcgcataat agtgcgtatc ggccatttcc gacggaaagt aactctcgcc
    71581 agccgcatag gcattaggtt cattgtgcgc ataccgatat tctgctccta gtcccatttc
    71641 tttcatcaat cgggtaggtg cgttgcgcaa atgttcggga acatcataat ccggcttctc
    71701 gcgcgcatcc tgcatcgccg ctttgaaagc gctatatact gcattacttt ttggcgcaca
    71761 ggccagataa acaatcgcct gagcgatagc ccgctcgcct tctgcggggc caacgcgagt
    71821 gaaacaatcc caggcggaaa tagcgacctg catcgctcgt ggatcagcgt taccgacatc
    71881 ttccgaagca attgccaaca gccgtcgagc aacatataac ggatcgccac cggcggtgat
    71941 gattcgggcg taccaataga gtgctgcatc cggcgctgag cctcttaccg atttatgcaa
    72001 cgctgaaatt agatcgtaat agcggtcgcc cttgttatca aagcgggcac tacgttcgcc
    72061 agcgatttca ttgaggagtg caggcgtcag gatacgcatg ccctgcgcgt caatttccgc
    72121 catatccgcc atcatttcca agctattcaa cgcacgcctg gcatcaccat tgaccaattc
    72181 ggctagcatc cgcccagtct cggcaggcaa aacaatattc tgcccaccat aaccacgttc
    72241 actgtcactc atcgcttgca gcaacacctg ctcgatatct tccgccatca gcgctttcag
    72301 caaataaaca cgggctcgag ataacaacgc ggaattaagc tcaaaagaag ggttttccgt
    72361 tgtcgcacca ataaaggtga tcgttccatc ttcgatatgc ggtaaaaacg catcctgctg
    72421 acttttgttg aaacgatgga cttcatcgac aaacaaaatg gtacgtcgcc ccgcattacg
    72481 attttgtcgg gcacgctcga tcgcttcacg aatttctttg atgccggacg tcacagcaga
    72541 aatgcgttca acatcggctt ggccataatg cccaatcagt tctgccagcg tggtttttcc
    72601 cgttcctggc ggcccccaaa gaatcattga gtgcaactgc cccgcctcga tagctcgtgg
    72661 cagaggctta ccagcaccaa gcaggtgctg ttgaccgata tattgcgcca atgtcgctgg
    72721 ccgcatacgc gcggccagcg gttggaactc gttatgggaa aaatcaagtg acagattgct
    72781 cactcttacc tcactgacgc tgatcgtcca gcgtgacccc tttcggcggt gtgaaagtga
    72841 attgcgcagc atccaccgcg ccgttttgct ggttcttcag cacataagtg ctccgctgcc
    72901 catcctgttc cgtcgcggta aactgcttga tcgtgccgtt tgtcgtcaca ttaatcgcga
    72961 actgcttcag attgccgctc gctgacttcg gcgtaagttc aaaatcatcg cctttctgac
    73021 gcacatcgta tttattccaa tcgctggtat cgttacgtgt aatcagaatg aacggcgtat
    73081 ttcctgttgc atctttcagc caggttgccg tgacttgttc aacaaacggg ttgtaaaacc
    73141 aaagtgtttt accgtcagaa atcaacgcgc tttcatcagg cgacgtggtt ttccagttaa
    73201 ataagttagg gcgtttcaac cacagttcgc cttccccttc ctgcaccgct gcaccatcgg
    73261 tgctagttac tttctggctg aagttcgcat ggaaactgtt tactttattg aggcgaccct
    73321 gcaaatcttt tgccgcgtcc gcatagacag cggttgaggt aacacctgca atcaggcaac
    73381 tgatagctaa ccactttttc atacgcataa tcctttgaat ttctaaatat aacgcgcctt
    73441 cgtctagcga ggtcagacgc ttcacatagc gcccacgtat tcgtagatct atgttatctg
    73501 aacccacttg agcggggata ggtgaattat ccgcttattg ccgcttttac gcttctttgc
    73561 ataagggctg ctcgcgcagc ccttagaggg agtggtttca atcaatacag tgctctattc
    73621 cattgatggc ggagccaaga cctcacggtt accattgtgc ccaggagaac taacaatgcc
    73681 ctgcgcttcc atttgctcaa cgattcgcgc agcacggtta tagccaattc ggaactggcg
    73741 ctgtacgccg gaaatagagg cacgacgctt atcgaccaca aatcctacag cttgatcgaa
    73801 caaaggatcg agttcttcat cgccatcaag accgaggctt ccaccttcag catcatcacc
    73861 gccgctgaca atattatcga tatattgagg gcggccgcgc gctttccagt cttgaacgac
    73921 agcatgaact tcctcatcgc gcacgaaagc gccatgaacg cggataggta ttgaggagtt
    73981 aggtgccata tacagcatat cccccattcc caggagcgat tccgcgccac tttgatcaag
    74041 gatagttcgt gagtcgatct tgctggaaac agtaaacgca atacgcgtcg gaatgttcgc
    74101 tttgatcagt ccggtgatta cgtcgaccga aggacgctgg gtcgccagta ccaggtgaat
    74161 ccccgcagca cgcgcttttt gcgccagtcg ggcaatcaat tcttcaacct tcttacccac
    74221 agccatcatc aggtcagcaa attcatcaac cataacgaca atgtacggca gtttttccag
    74281 cactggcgga gtcatatcca tactgtcgcc cggcttccaa aacggatcgg gaatcggacg
    74341 acccatcgca tttgctgtca tcacgcgttc gttgtatccc gccagattac gcacgccaag
    74401 cgctgacatc agtttatagc gacgctccat ttcaccgaca caccagcgca gcgcatttgc
    74461 ggcatccttc atgtcagtca cgacctccgt caacaaatgc ggaatgcctt cgtacacgga
    74521 gagttccagc atttttgggt cgatcatgat aaagcgtacg tcttcaggcg tggctttata
    74581 caacatactg atgatcatgg cgttgacgcc gaccgactta ccggagcccg tcgtaccagc
    74641 aaccaacagg tgtggcattt tcgccaaatc agcaacgaca ggttcgcctg caatatcttt
    74701 ccccaacacg attgccagcg gtgaagggtt atgtcggaat gcatcgcagt ccagcacttc
    74761 tcgcagataa accgtctgac ggtgtgcatt cggcaattcc agtccaacgt acggcctacc
    74821 gggaataacc tcaacaatac gcacggcaac aactgacagt gaacgcgcca aatcgcgcga
    74881 caaattcgag atacgcgctg ctttaacacc cggagccaga tccaattcaa accgtgtgat
    74941 taccggtcca ggagagtgat cgaccacatc cgcttttacc cgaaaatcag ccagacgcgc
    75001 ttcaatcaat cgcgccgttt gctctagagc aaaattatca acaggcgctt cgcttgtcgg
    75061 cggcgaggtc aacaaatcca aagttggcag cggcgtagtc ggcttctgca acggttgttc
    75121 attacgcatc aggaacggat gaatcaggcc atccattgcc ggatgatgcg ctggcgctgt
    75181 tgcattttcc tgtcgcgtaa cgtcaacagg cgctgacgtc gattgcactg gctgatcaaa
    75241 catcaacgga ttgcgctcgt cgctctcgtc ctcatcagca tgcatcggcg gaagatctgg
    75301 ctcagtgtta taggttggct gcgaatacgt gggttcgctc gacgtacgtg gctcaggctc
    75361 gcgctcactc tccgcgctaa acggtgagaa tgaaaaagcg ttatgcggca ccacagggtt
    75421 tgactgaata ggctcactgg tcacaggcgg tgttatcgga gcacgaatgt gttcatcgtg
    75481 ctccgacgaa ctggcgtcat agcgtgactg ctgttgtgca tcgaaatctc tggctagctg
    75541 tgcttgcaga agcgcgtctt catcatcttc ctgtaacggg tactcatcac cgtaacgctg
    75601 gcgctgctgg tccagatacg cttgctgcaa tgcagcttct tgctcggcga catcatccag
    75661 cgtctcttcc tgatacacgt cgttcgtcaa ttccatttct gcactaccgc tctgcgcctg
    75721 tagccttgct tgctcttcgg ccagacgctg tgacggtaac ttgattccgt atgacgccag
    75781 ttcacggcgc gtaggaatac gcacgggatt aggacgcggc aattcaggcc ctacgccgcg
    75841 tttaatctgc agattatcat cggcatcagc actgaacgcg ggcataaagg tgttgttcac
    75901 attgaaatct gtctcacgtg ctggttgtgg cggttcagca aacggttgga ctatcggtga
    75961 cgttactatc ggcggtacag cactattctc gtaagtattc ccgtaaggca tagacgcact
    76021 gctatggatc tcaggcgagg tcataatctc cggcatcgcg ataggcgcat cagggacttc
    76081 aaacgaatac aacggcgggt tcagcgacgg tgtcgaatca atcgctgatg gggtaacggg
    76141 cagcacaacc tcagataata ccgaattcac taccggcgct tctgctaacg agatcggttg
    76201 tgtagtaact ggcgcatttt cggttaaaga ggatgcttct tctatcttgt catccatcgc
    76261 agtgtcgttt acgacaccag caacggaagg cgtagaaaac aggacatcat cgtcatcacg
    76321 ctgttgtgtt atggcttcgc ctgatacttc atcatgctgc acgttaagcg catcacgctc
    76381 atcgtcttca cggtagtcct catcgcggcg cgaacggttt gacataaatg tcagacaggc
    76441 caacacaccc gcgccgattt tttcggcaat ggttaaccat gaccagccgg taaacagcgt
    76501 taaccctgcg ccccaaacgc acagcagaat gagcgtcgca cccatgctgt tgaaacgtgg
    76561 gatcattgag ctgctcaaca ggcttcccaa gacaccaccg gaagcgaaat aatagagatc
    76621 gtcaatgttc aacgcagcca aaccacaaga ggtcaggatc agcgccaatg tccctatcag
    76681 gcgaagtgaa aaggtaaaat attcaataga ctggtggtta tcacgctggc ggaaagcagc
    76741 ccagcacagg gataacataa tcggcggaat ggcataggcc agaacgccaa aaataaagaa
    76801 cagcgtatcc gccaaccagg cacccgccac accaccaaaa ttatggatag gctcatgcca
    76861 cgcagtctgt gaccaactgg gatccgaggg gctgaaactg agtagtgcga cactgagata
    76921 aaccgcaaaa agtgccacta cgattaaaat cgcttcaagc aaacgacgtg ttccgttgag
    76981 ttttttcagg gtaacgtctt tatcttctgt atattcctgg ctcaagagtc tctccagggg
    77041 cctgtaaggt ttatgacaaa gcgccgagaa aacccggcgc tgggactgta taaattcaca
    77101 ggagtgtagc tgaatttatc gggttttgca cccacacgtt tatcgagtct taatgaccag
    77161 acgattactt tgcttcactt cttccatcac cacgtatgta cgggtgtcgt taacgcccgg
    77221 cagacgcagc agcgtttcgc ccaggagctt acggtaagcg gacatgtccg gcacacgcgt
    77281 tttcaacagg tagtcaaaat caccggaaac cagatggcat tcctgaattt cttctagctt
    77341 ctgcaccgca gtgttaaact gttcaaacac atcaggcgca ccgcggttta gcgttatttc
    77401 aacaaaaact agcagtgacg catccagata atgcgggttt agcagcgctg tgtagccatt
    77461 aatgaaaccc tgtctttcca gacgacgtac acgctccaga caaggcgttg gtgatagccc
    77521 aacccgtttg gaaagctcga cattggaaat acgcccatct ttttgcaatt cgttcaggat
    77581 gttacgatca atacgatcga gatcttttcc tggccgtttt ttagtgtcta ccattattat
    77641 tgtctctctt cactttccct gcacacgctt taccccgata gacctcatgt atcagagtta
    77701 cccttaaaga agacacgctg cctattttgt atatcaacag tattcacttc tcgttctcgc
    77761 cctacgcatt actcacccgc gaagaagacc atcacgtcat atccatggcc caaaagacct
    77821 acctgcgcag aaacgaataa aaagccgagc ttttaactgt ccacatacaa aaaatttcct
    77881 cttacccaga tgttttcgca aatgcacagc cgattgtcaa agcaaaacaa cgaaaatcag
    77941 aagaaactgc cagattggat aagccagagc cattcaccaa ggtggcttca atcattttac
    78001 ttatgaatgt ggctgatttt tcagcgattt gtcatcacca tcgtcattaa cgattaa
//
