# Supplementary material for: May the Phage be With You? Prophage-Like Elements in the Genomes of Soft Rot Pectobacteriaceae: Pectobacterium spp. and Dickeya spp
Source: Front Microbiol. 2019 Feb 14;10:138. doi: 10.3389/fmicb.2019.00138 (PMC6385640; doi:10.3389/fmicb.2019.00138)
Supplement: Supplementary file 2 [file Data_Sheet_2.ZIP › Supplementary_prophagesGENBANK_files/Genbank FILES _SRP_prophages/phiPa2.gb]

LOCUS       Exported               34567 bp ds-DNA     linear   UNK 02-AUG-2018
DEFINITION  phiPa2.
ACCESSION   .
VERSION     .
KEYWORDS    .
SOURCE      phiPa2
  ORGANISM  phiPa2
REFERENCE   1  (bases 1 to 34567)
  AUTHORS   .
  TITLE     Direct Submission
  JOURNAL   Exported Aug 2, 2018 from SnapGene Viewer 4.2.3
            http://www.snapgene.com
FEATURES             Location/Qualifiers
     source          1..34567
                     /organism="prophage phiPa2"
                     /mol_type="genomic DNA"
                     /note="/genome_id=6666666.356861"
                     /note="/genome_md5="
                     /note="/project=robertczajkowski_6666666"
                     /db_xref="taxon:6666666"
     CDS             complement(1..798)
                     /codon_start=1
                     /product="Pyruvate formate-lyase activating enzyme (EC 
                     1.97.1.4)"
                     /EC_number="1.97.1.4"
                     /label=Pyruvate formate-lyase activating enzyme
                     /db_xref="SEED:fig|6666666.356861.peg.1"
                     /db_xref="GO:0043365"
                     /translation="MNNSNTCFSTEKPDIAEAVKSVIGRIHSFESCGTVDGPGIRFIIF
                     FQGCLMRCLYCHNRDTWDTHGGKEVTVEELMKEVVTYRHFMNASGGGVTASGGEAILQA
                     EFVRDWFRACKDEGINTCLDTNGFVRRYDPVIDELLDVSDLVMLDLKQMNDDIHQNLVG
                     VSNHRTLDFARYLAKRNQRTWIRYVVVPGWSDDDESTHKLGEFTKDMTNIEKIELLPYH
                     ELGKHKWVAMGEEYKLDGVKPPKADTMDRVKSILESYGHKVIY"
     CDS             complement(839..1825)
                     /codon_start=1
                     /product="Integrase"
                     /label=Integrase
                     /db_xref="SEED:fig|6666666.356861.peg.2"
                     /translation="MSIKKLDDGRYEVDVRPQGAEGKRIRRKFNTKGEAQIFERHILVN
                     YHNKDWVEKPADRRKLTELLSLWWIYHGKSHDRGEIEKGRLNAIIVKLAEVGVIRADQL
                     TKKAILDYRVNRLNEGLKPSSVNRHHAILSGMFTKLIEADEYHSQHPFKDVKQLKEQQA
                     EMAFLTAGEIEDLLQLLDGDNRKAVLVCLATGGRWGEVANLKCEHIINNMLTFMKTKNG
                     KRRTIPISPALMTQIKHAKTGFVCHPNYDAVRNTLRAMKPDLPDGQALHVFRHTFATHF
                     MMNGGNIITLQRILGHSTIQQTMVYAHFAPDFLQDAVLLNPLNGVSI"
     CDS             complement(1892..2191)
                     /codon_start=1
                     /product="C protein"
                     /label=C protein
                     /db_xref="SEED:fig|6666666.356861.peg.3"
                     /translation="MSIMIQEKLKLIRESERLKKKEVADMTGINYVTYVGYENGKSSIS
                     HDAVVRLLKHPRFRKYRDWFMFDETNPEAGQIAPALAHIGQDETKSHQSDHKIG"
     CDS             2300..2662
                     /codon_start=1
                     /product="hypothetical protein"
                     /label=hypothetical protein
                     /db_xref="SEED:fig|6666666.356861.peg.4"
                     /translation="MLDEAKTILEGEGDDTANTTPRRQIRLSEKPADLLSKEGFALYVG
                     KTTSAIVAMAKAGKLPAFYMADPLKPGGNAELWIHRLEWDKYAKQLVETAPPEWHGWKD
                     RISASKPTRRHRGVSA"
     CDS             2856..2981
                     /codon_start=1
                     /product="hypothetical protein"
                     /label=hypothetical protein
                     /db_xref="SEED:fig|6666666.356861.peg.5"
                     /translation="MISTARLLKEKSPSPQENKGWLELPNGQRFQPTPAQAYFAP"
     CDS             3062..3397
                     /codon_start=1
                     /product="Phage protein"
                     /label=Phage protein
                     /db_xref="SEED:fig|6666666.356861.peg.6"
                     /translation="MANTEAVRAVPLSIAARTDGLNHIAMLRGKHFNTNSEKDMCRFID
                     DMRDKIDGDYHQNMRVLSAIFELADIDKERRNMKFNELTTEEKAKLIKAMNKLKAVVSL
                     FPKHLIL"
     CDS             3468..3701
                     /codon_start=1
                     /product="hypothetical protein"
                     /label=hypothetical protein
                     /db_xref="SEED:fig|6666666.356861.peg.7"
                     /translation="MRNAEVKAMQVAGNEALVSLLGKARLDEKKDQHWSFAQRLAALAL
                     HAQQKEYSAAEVIELLRKEAEHFEHSSQEIIV"
     CDS             3698..4597
                     /codon_start=1
                     /product="Exodeoxyribonuclease VIII (EC 3.1.11.-)"
                     /label=Exodeoxyribonuclease VIII
                     /db_xref="SEED:fig|6666666.356861.peg.8"
                     /translation="MNHVMIDIETMGKNPRAPIASIGAVFFNPKTGELGEQFYCRVDFE
                     NDMLNGAVTDSGTIKWWLRQSPEASAELISDDATPIWGAISQFSDWLTDNAESLKTLKV
                     WANSPSFDCTILKSAFERTEIDIPWNYWNERDVRTMKEVGFAIMNMGRFLGTAETIGVK
                     HNALDDAINQVALVSAVMSRLVGNKPEKLGGCDWIDWNELSKRGLLARINHEIMHPIGL
                     AIFRDQETGGSGGALISPDGKWEYGKNLHEPLSNLIFSEVADFFAGLEQPGAPRSAADM
                     QKALLCRLERVIRARTPQ"
     CDS             4594..5442
                     /codon_start=1
                     /product="Methyl-directed repair DNA adenine methylase (EC 
                     2.1.1.72)"
                     /EC_number="2.1.1.72"
                     /label=Methyl-directed repair DNA adenine methylase
                     /db_xref="SEED:fig|6666666.356861.peg.9"
                     /db_xref="GO:0009007"
                     /translation="MIRPFIKWAGGKTRVLPDLLPLLPKGDCLVEPFVGGASVFLNTDY
                     PSYVLADINPDLINCYRVATTDTDALISTAKVLFQHGNNKAEYETRRRSFNYQRSTGYG
                     TGIEQAALFLYLNRHGYNGMCRYNREGGFNIPFGKYRAPYFPEQEIRQFAEKANDTGAI
                     FVCADFKETLRVYAEPDTVIYCDPPYLPVSDTANFTQYHHSAFTHEHHRQLAKYLKHVR
                     YETDAAVVISNSDTPATREIYQHYQFHEVSVSRSLGAAVASRKKARELIGVLTAGMLRD
                     A"
     CDS             5435..6460
                     /codon_start=1
                     /product="PUA-PAPS reductase like fusion"
                     /label=PUA-PAPS reductase like fusion
                     /db_xref="SEED:fig|6666666.356861.peg.10"
                     /translation="MHNNLAPFTLNWRCREPNIINVISVSGGKDSLAQWLLAVKNGVSH
                     IPAFADTGHEHPQTMEYLDYLESKLGKIRRVHADFSRQIAGKRKFIAEKWPITLVSECG
                     FTDVQAENIIATALDTLHPTGIPFLDLCMWKGRFPSTKRRFCSTELKHEPIRLQVVEPI
                     VDAGFEVVSWQGVRAEESASRALLSEWESGFDLGPRLSIYRPILHWKHADVFALAKRHG
                     IKPNPLYEQGCSRVGCMPCIHARKSELAEIFRRWPEEVERVARWERLVAACSRRQNSTF
                     FPSTNDPKKAERRIECISVESHGIHTYRDWALTTRGGAAVRFIGRSRRSDGLQQRLRWG
                     L"
     CDS             6464..8998
                     /codon_start=1
                     /product="Phage replication protein # Replication gene A 
                     protein"
                     /label=Phage replication protein # Replication gene A
                     /db_xref="SEED:fig|6666666.356861.peg.11"
                     /translation="MSEQWAYPWNAPRPAISIPQGIADSFLSSTANATEPHPAVERHLK
                     RLVSRAAFSDLDFEQAVARLEYFEHNSTLLTMRRQFAEAERDEHQASLQNWMETPEGVE
                     TRLLEQPFFIRDTYRKKIEWLRANREPRHVSAFFMGTVKKALLRLDAVRVKQGVRDGFT
                     SELASYWRARWQHLAEFTKHEAINAGHAIAASITEMFETECGNTLPSDMTNDEIQSLFW
                     HLGHEMLALRVTPPCWGVIIGDNESKKRICSAILRIISPEWWGRKLWRLRCEWRENQFR
                     AIGVIHKKRMPYVSIDALNQWQEQRRKNREFFKAHELVDEDGNVASLENMVYASISNPV
                     IRRHELMTRMAGVEMVAISRSDEGVFLTITCPSRYHATIQSGHQNPKWDTSSPRQGQRY
                     LCKTWAKAMSKLNRRGLRPYGFRVAEPHHDATPHWHVLLFMPPEDRKEITEILREYFIA
                     VDRAELGRNTGARFKAKRLDPQKGSATAYVAKYISKNIDGYALDGERDNETGKPLRETA
                     RFAMAWASQHNIRQFQPFGLPPVTVWRELRKLANQLTAVQKEAGTFRRGASQLADPAMD
                     AVLASADAGCFATYIEKQGGVLIPRELYTVRIAYEEADEQNDYGETPEKIFGVFSPRLG
                     EISRICTRLVKWKIRKKQAADAGVNDGADRGLAVTSPTGDAWSSVNNSTGDEKISISEP
                     ADREIGSTSEPEITDFEHMTDTERRGLLNRLRSQPPDRRHKEHSSTTQPHKETEKQTVS
                     KRSDDWRTSVADFARSLGWDISAGELRRLETGNAITIAGYAYVASADGCLYQAPMKKQK
                     DTEYHDKAAALLQRIAVLCEATWSETTSQRYR"
     CDS             9334..9618
                     /codon_start=1
                     /product="hypothetical protein"
                     /label=hypothetical protein
                     /db_xref="SEED:fig|6666666.356861.peg.12"
                     /translation="MTVNVVKKTGDFVLRLREKDSLSAISGRTLETLIDVTGMTKTELA
                     HLALRRLADALLPHYEKDDGALSIAQIQTIREFSTATDIPEERFTKSLL"
     CDS             9772..10038
                     /codon_start=1
                     /product="hypothetical protein"
                     /label=hypothetical protein
                     /db_xref="SEED:fig|6666666.356861.peg.13"
                     /translation="MVVYGTSQKTDKIFDTEFVLRCDDAGFAISGLAYDTKFDMSTLVT
                     LPYTNEWFDIAPMKGGQLPISPVMGTLHPTYILALKKASKKGS"
     CDS             complement(10110..10385)
                     /codon_start=1
                     /product="Phage protein"
                     /label=Phage protein
                     /db_xref="SEED:fig|6666666.356861.peg.14"
                     /translation="MVNMRIFKINCPECGSPAIIRKSDWKDKKLADLYCACTEVECGHT
                     FVFNASFSHTLSPSGLTGNKLVKFLIDQLKPDEKQFALNLLSGHGT"
     CDS             complement(10433..11488)
                     /codon_start=1
                     /product="Phage portal protein"
                     /label=Phage portal protein
                     /db_xref="SEED:fig|6666666.356861.peg.15"
                     /translation="MTKRQNKKFKAATGNNVETFTPGRGSVITFGEPEPILTTGTDYHN
                     IWYDNEYNHWRLPIDRLALSQLPNLNAQHGGVLYARRNMVASGYISGGLTADQVEQMAF
                     DYLLFGDVAILKIRNVFGEVIDLLPLPSLYLRCRKEGSFVILQEGPALIYEPEDIVFFK
                     MYDPRQQVYGLPDYIGGIHSALLNSEATIFRRRYYNNGAHMGFILYTSDPNLTLEMENE
                     IKTKIAESKGLGNFRNMFINIPKGNPEGVKILPVGEVSAKDEFANIKGITAQDIFTAHR
                     FPAGLAGIIPTNGAVMGNPDTARTTYRKDEVIPLQRKFMNGVNTDSEIPAHLHLQFNVE
                     TSPMTDDKGEK"
     CDS             complement(11485..13335)
                     /codon_start=1
                     /product="Phage terminase, ATPase subunit"
                     /label=Phage terminase, ATPase subunit
                     /db_xref="SEED:fig|6666666.356861.peg.16"
                     /translation="MIISSEYSRHNIRMAKYSDEIKDAARALYIKRWAPKDIAQELNLP
                     PRTIYHWAETGQWASLLPVEAVEHVIARRIDQLTGREKKTALELEELRDLIAHHVKLMA
                     QQNKHAEKMAEMQAKKAAYDGEGYCLSAASGEPGERKRRYKKNDVSSLTPEMLDTWAQE
                     HLFEYQLHCRDHKDEDWRFILKSRQIGMTYYFAWEAFEDAVVSGDNQVFFSASRAQSEI
                     FREYIVQIAQNHFGITLTGKNIRLSNGAILRFLSTNASTAQGFNGHLYGDEVFWIPKFT
                     RLHEVASAMATHNKFRTTYFSTPSAKTHQAYPVWTGDEWRGDDPKRKGIEFPKDSAMRE
                     GIICPDGIWRYVITMEDAIAGGLGALVDIDRLRNKYNPTAFAMLYMCQFVDSKDAVFKF
                     AALVGCEVDKAIWGDYDPTAARPFGNREVWAGFDPSRSGDNSTFVIIAPPIHDGERFRV
                     LAIWQWQGLNFSWQADQIKQLMRRFNITYIGIDTTGIGKGVYDLVSKFAPREATAILYS
                     VESKNRLVMKMIDVVERKRIEWAKDAIDETNKERAEIPASFMAIRRTTTNSGNALTFVA
                     ERSDATGHADVFFAISHAVINEPIDHEFDRPSTWAFGEAA"
     CDS             13472..14530
                     /codon_start=1
                     /product="Phage capsid scaffolding protein # Fam Scf032"
                     /label=Phage capsid scaffolding protein # Fam Scf032
                     /db_xref="SEED:fig|6666666.356861.peg.17"
                     /translation="MPQSHYRTDWLCIATSGQAVDGRTIEPQWLIDAAETYTRKTYTAM
                     IWPHHPQYDIGEREFTCNLGEVDALKVETEGDVTKLYAQLVPNQFLIDANRMGQKLFTS
                     AEFVSDFAGSGREYLFGLAVTDIPASLGTEKLKFVLAGEEKDAERGNLETFSLGKLQTP
                     DKKESFWSRLFSASKAFTPTPEPNTDKPDEGEEQKMEELKALLQQLLELVKNGKDAASG
                     DADAVDTPEQAAEAVADIAEEIAAAADEVAVLAQDVADNPEDEVKAAEFTVAKANLAKA
                     MKAFNVTPDKRPRSRSRRREFSARSKPANDAMGDLTTQLTTVLTKLSAMEDGGTRRPNS
                     APNGGNQPFEFV"
     CDS             14560..15567
                     /codon_start=1
                     /product="Phage major capsid protein #Fam0066"
                     /label=Phage major capsid protein #Fam0066
                     /db_xref="SEED:fig|6666666.356861.peg.18"
                     /translation="MQLTPKAEALLRKYAAGLATANGQVDTSRFFSLTNPKETQLRSAL
                     LQSSEFLSLLPNVLDVNQVTGQVVTTGKPGIYTGRKKDGRFSRPLSVGGNEYKLVETDS
                     GSYLPYSLLVVWANAGSEDEFFQRIQAFSNESFALDMLRVAFNGTSVADDTDPDANPNG
                     EDVNIGWHQIVKTRSAEQIIVDDVTIGGAGADFIGLDAAVTDLVHNCIYEPFRNDPRLI
                     VLASADLIGNDATTMMNRIDRPTEKVAAQLIGRQIAGRTVYTPPFMPEGRLVVTTLDNL
                     HLYTQGGTRKRKAEWNDDRKRFENNYLRMEGYGVEHDELYAAFDKITLATGEGE"
     CDS             15570..16274
                     /codon_start=1
                     /product="Phage terminase, endonuclease subunit"
                     /label=Phage terminase, endonuclease subunit
                     /db_xref="SEED:fig|6666666.356861.peg.19"
                     /translation="MAMSPCQRHRASVKAAKALDNREALAASPVSFHLQKLELEKDVAI
                     LRSLPRTEDRIEMKRDVLLPRWMPSVEAYLAGDARFANPALAYCVIWLFDTGEMGKALD
                     WADAAISESQATPDNFKSTLPAFVADTVLEWATGEAAAGHSIEPYFSRTFNNVRDKWRL
                     HEDINAKWFKFAGLYLLRDENGQPRATAVDDVDTLEQADALLEQAEKFNRHAGVGTIRK
                     KITARIRGLTEK"
     CDS             16385..16858
                     /codon_start=1
                     /product="phage head completion protein (GPL)"
                     /label=phage head completion protein
                     /db_xref="SEED:fig|6666666.356861.peg.20"
                     /translation="MAVPSLGFSGKPIDYQDEPIVNGVAFWPDLNLAEFQRSRTIPPDL
                     PASTAAQALLAAVAEVNDNLGDVVIYWRERGHEQAIDVPGARAGNENQLTAQYKKAIYA
                     RAKADLLGEFASIGRRETHPGQESAETRDILLAEAAFVLRNMQRYPRVGVHLI"
     CDS             16855..17346
                     /codon_start=1
                     /product="hypothetical protein"
                     /label=hypothetical protein
                     /db_xref="SEED:fig|6666666.356861.peg.21"
                     /translation="MSQIESLTAFLTQNLPERAMQQFESALDNAELIPAPKALGLEQRR
                     IGVFRYQAILNWGSFPYRICPPAQVYALVLAWLADSRNELYDELVLSPPSVDIEFDEEV
                     SSPLEIVVELADSINIRPSETGDIPFGGQRWELADPELWTALSGALYAADAHGAPLSES
                     "
     CDS             17346..18050
                     /codon_start=1
                     /product="hypothetical protein"
                     /label=hypothetical protein
                     /db_xref="SEED:fig|6666666.356861.peg.22"
                     /translation="MAVAVQGGLPQRQLRQLRAALASLELPPKKRQRLLWRIAKLGVIV
                     AAKRNQRNQTSPDGQPWAPRKRGKGKMLRQLPKLLHVREMPQIDAVRIYLQGGQYKNGQ
                     VPVSAGLIGAVHQGGASFSMSADRAPRPDQRNRPALPRQAKKLRALGYKMRKGNRYVKA
                     SSKYILDTLSMAQAGLLIKKLRGEPTKTTWKIDIPSRVFLGVSDDEFNKILARQLQAIG
                     FGWDVNAQDSGG"
     CDS             18052..19191
                     /codon_start=1
                     /product="Conserved hypothetical phage protein"
                     /label=Conserved hypothetical phage protein
                     /db_xref="SEED:fig|6666666.356861.peg.23"
                     /translation="MTWPTITINQLNQLQGETKEIERVVLFVGRAVGDAIPVTPVNTQS
                     NLDSLLGAEDSTLKRCVEAARLNAGQNWSAFVVSISDDELDEQPAAEVAKIWAQRVENA
                     QAVASVEGVVVTLEATKSTIAAAASLRTTLISKYGRWVWFILSVSGLQAGESWTVYLAR
                     LADLQRGDAVPSVQLVPNLWGSEAGVLAGRLCSRAVTVADSPARVRTGPLIGMGTVLPV
                     DSDDMPLGLATLQALEAIRYSVPMWYPDYDGIYWADGRTLDVEGGDYQVIEHLRIVDKI
                     ARRVRLQAIAKIADRSMNSTPGSIAAHQTFFARHMREMSRSSQINNVTFPGEVQSPREG
                     DVVIAWTSSVAVAVYLTVRPYGSPKSITVGIMLDATLEA"
     CDS             19194..19649
                     /codon_start=1
                     /product="Phage tail assembly"
                     /label=Phage tail assembly
                     /db_xref="SEED:fig|6666666.356861.peg.24"
                     /translation="MTQRIGGQSFDISLGTELVHVKTATLDITDNTAVSQTRGIPDGFV
                     AGDVGAEGEMEFDTKNFKKITALARVAGSYRAIPTSDILFYANTGDEEFKVEAFGCKLV
                     LTGPVAFDPKGGETATHKVKYLVTSPDFVRIDGVPVLSETDIRDLIG"
     CDS             19937..20278
                     /codon_start=1
                     /product="Phage protein"
                     /label=Phage protein
                     /db_xref="SEED:fig|6666666.356861.peg.25"
                     /translation="MSLSAKQATFTVMVARLITWAAENGYSLTFGEAYRTAEQAAINAK
                     SGAGISNSLHTQRLAVDFNLFVDGVYQSRTEAYTPLGEFWESIGGAWGGRFTSRPDGNH
                     FSLAHGGVR"
     CDS             20278..20652
                     /codon_start=1
                     /product="hypothetical protein"
                     /label=hypothetical protein
                     /db_xref="SEED:fig|6666666.356861.peg.26"
                     /translation="MKQLLAFVVAAFLAGWYVNDLQHDSTELSITRAATAAANGVRTSL
                     EDIAGQSGRVLEEKLQELRANEHTQDRVFHTETLKPIFLNVCASDEYVRLFNDSAEQAE
                     RALSGKFANPLSGATPPPGG"
     CDS             20627..20770
                     /codon_start=1
                     /product="hypothetical protein"
                     /label=hypothetical protein
                     /db_xref="SEED:fig|6666666.356861.peg.27"
                     /translation="MQLPRLAGNTGQDFDQALRAYSTLYSECAARHNQLIIEVNQRREI
                     EQ"
     CDS             20767..21039
                     /codon_start=1
                     /product="Phage protein"
                     /label=Phage protein
                     /db_xref="SEED:fig|6666666.356861.peg.28"
                     /translation="MSKETNVITLTVNGRELSFSPTLVAYNKLSNEAARDGDVIGTIAT
                     YLKRIVTPDTRDTLNELLQSPGIGTQIAKKVNEIYAPEVEIEVKG"
     CDS             21084..21233
                     /codon_start=1
                     /product="hypothetical protein"
                     /label=hypothetical protein
                     /db_xref="SEED:fig|6666666.356861.peg.29"
                     /translation="MTLRRHYLPHDDDDAMSLARAAWLAEYFHECQINSTAAGIAFAFN
                     GSRE"
     CDS             21236..23416
                     /codon_start=1
                     /product="Phage protein"
                     /label=Phage protein
                     /db_xref="SEED:fig|6666666.356861.peg.30"
                     /translation="MRELGFLLSLKNQLSAPLGRAQQSVEQFANRSADALARVAVGAAG
                     LWGVAQGVKGLLDPANDVKKALDELSTRNVSTQSLDAVYQSAQAFSTAYGKSAAEFVAS
                     ATVIRSSIAGITDTELPRYTTGLNTLAVATKSSAEGAASYMNDMASNFSTVAKRMGNIP
                     FAEMMASKGAYMVQNFGTSLDEIKELVKSSKGTGTQMGVGMDEQFSVMGMLKQTKGTEA
                     GGIYDAFLKSAVEGGKQLGLSFTDAQGKMLQFPDILQKLQGKFGSSIEGNIKAQAALNK
                     AFGDGAQALTATWGQADKLRQHMRDMGNTQGLDRATEMAKKMADMWERLDKVWERIRVS
                     IGMRLIPAISPLGNTVIAIGEKFAKWLDMFPNIARWLGYVALSTLAFAAAGATANIVFG
                     ASRFIWTGLLPLWSLGTKSLALVTGQLNVMTSIGTKATTAMNWLRSSFIVTKVAAWAAA
                     IGVNAVIWPILAIIAAIALVVIAVVKFWHPIKAFFNGFISGFSEASGALAPLSPLFDLL
                     GAAIGIVWQGIKALFGSFSELLTPIAYSSEELAGVTSAGEMCGRIVAEAIGWILAPIGW
                     VVEACRVLDGVFADLWSSIQLGWEMAVNFFAGLSPVAAFGGFVDAIKNIFSGLWASLMD
                     SFTQTYNFIAQGLNYLPGINIDLKPTSGSTLAAPAGITAPPMQNGGISKTLQTNNQSTA
                     NTRKTEIASVNIYPPNGATFTSIAESQELAAG"
     CDS             23413..23742
                     /codon_start=1
                     /product="Phage protein"
                     /label=Phage protein
                     /db_xref="SEED:fig|6666666.356861.peg.31"
                     /translation="MSDALYFDLLITDGDFTLNTGNEPQLCNNRVSIAQDVVHRLIESG
                     LVKQLVAERSPVLRSDIMLRMELLTEEDTRLVPGTVVIRDNGRGNYFIDAETYDFGPIS
                     VSEPL"
     CDS             23739..24923
                     /codon_start=1
                     /product="Putative bacteriophage protein"
                     /label=Putative bacteriophage protein
                     /db_xref="SEED:fig|6666666.356861.peg.32"
                     /translation="MSNRPNPDYERILAEQGMPVTDKQIRAEFDEVVADAGMITNTSRM
                     SPFWRLITAIVTAPVMWLKNALVNTVMKNLYLATASGAFVDVFAWAVNLERKGAAGARG
                     VILFTKSDPSITAVVPAGTQIQTERINGTVYRLTTDADFTIDAGISSALIPVTATGAGS
                     GHNLAPGYYRILSVGVDNIEQVVNDDDWLTAPGADVESDDELRDRVRNQFNLPGQYHID
                     AVYRGAIAQIAGLTTDRIFFQHDAPRGPGTANVFLLLDSGVASQPFIDTVNDYVMAQGH
                     HGHGDDVLCMPLPEFDVPLGVTVYLKNYENFTIQELQALRVNVLDLIRCAFRQNTDYDV
                     KKTWPYSRFSFSALAGECHQYFPVIESITFSESDIVSDLSIPRLSGVSVVFKNV"
     CDS             24916..25548
                     /codon_start=1
                     /product="Phage protein"
                     /label=Phage protein
                     /db_xref="SEED:fig|6666666.356861.peg.33"
                     /translation="MSEFKTWLDSQPLPPWMDKGEPIKLFTAVKQFWLKTYDWVQFPLR
                     QFDAETCDVALLDAMAYQRDIQRFNGEPLALYRKRVKFAFINAVDAGSVAGFINIFRRL
                     DIGDVTLAERQPAHDWDVILVQLDDEQLGTYNTLMMDLIRQYGRTCRRYHFDVTNADIS
                     RIRAAEFSHDAAFYAVDVDTVHGLVEGRTPTNAPAFTSSTEYYTASQ"
     CDS             25555..27510
                     /codon_start=1
                     /product="alternative bacteriophage tail fiber C-terminus"
                     /label=alternative bacteriophage tail fiber C-terminus
                     /db_xref="SEED:fig|6666666.356861.peg.34"
                     /translation="MAQSIVTRAFEAWNVKKTLDGQPAVPDQIVFALIPNQDEDQAVSR
                     DEGMPDAAAIKHRAAITQSGVLNTNAVVYSVVLDTAIGDWDYNWIGLVDSQTQTVLMIV
                     HVRTQQKIKTQNGRQGNSLTRNLAMQFDGAAEATQINVSAQTWQIDFSARLYGMDDALR
                     VALLDYYGPAAFLGDGFNVSVAGTQAMVAPGVGYVGGLRAVLDAAEQLAVSANTGVWVD
                     VSRQGTVTGAWENRVTLRTAAELADYTDENGYAHYIAKVATITAGQVVDNRMASPVYLL
                     DKRFLQIDAAAEKYAPLKSPKLIGAPTAPTASQLTSNSQIATTEFVKAAILALVNDSPA
                     DLDTLKSLAEAVNNDPDFSKKVLSALTGKLEKDKNGSDINDVGVFLSNIGAVSLNTFQV
                     ITGKKLLSADDDVLTIKPTANGQRAYIQFNNAQSTEAIAFVGMRYGNNEQALTFEHRSG
                     SSIRLVDGEVSLHGLPRVTTAAQGTNTTQIASTEFVQSAINDGAGIPLPWPQAVAPTGW
                     MKCAGQSFNKSEYPKLSLAYPSGVLPDLRGEFIRGWDDARGIDAARVLLSAQGDAIRNI
                     TGEIWTTAQNLQFLGENLQSSGVFELLHEFGVGAIADGAGDSCPSRMRFDASRTVPTAS
                     ENRPRNIAFNYIVRAA"
     CDS             27510..28124
                     /codon_start=1
                     /product="Tail fiber assembly protein"
                     /label=Tail fiber assembly protein
                     /db_xref="SEED:fig|6666666.356861.peg.35"
                     /translation="MSNYSTQIKNAELNESGLAINAGWITVYHVNSATREYQSASYEYV
                     MQGVGLPADSYADEPELPPVGQALRRTDDGKAWEAVPDYRGQTVYSMNTRQAQIVTQFG
                     ELPDNVTLLKPATEFDVWNGKKWVIDKAAQAAAALKAAQLELATRKAAATSRINELTYA
                     IDLDIATDDEKTALTAWQKYAVLLSRIDVNAAKIDWPEAPQ"
     CDS             28125..28826
                     /codon_start=1
                     /product="Phage protein"
                     /label=Phage protein
                     /db_xref="SEED:fig|6666666.356861.peg.36"
                     /translation="MWHEKRLAIPANMRPITCSTVVVHPWTFGVGQTVESGVFLSPPNA
                     VNTLAGKLAGTPANHDVVIFMITAPTIEQFITLLTAAAAVFPLPDLTQVQRRARSALSL
                     AVTKMQRPMMAGSLPAAVPLSFSTARSASTAQAMQQAIGQASGAGMADIADALAGFAAQ
                     RQTLLAAAGETLQQLQGMSVPIWALEVSGSVETALLDMREDIPNPDAVLTLCMMFVGED
                     LGPLREMVTER"
     CDS             28823..29386
                     /codon_start=1
                     /product="Phage protein"
                     /label=Phage protein
                     /db_xref="SEED:fig|6666666.356861.peg.37"
                     /translation="MNQIIVLALDGEAILLKNILVSPSMQIQDKDQSGQASSTASAEQG
                     IKGKELRVSGLIPFAEKTQLTRLFALAEAKSADGSMKRYRVANEVAQAIKFREATFSGA
                     IDAAPQTDKMAWLVNFTLKEFFSVAERKAAQASAKGGAGTSAGATAQTASGTGNADEGE
                     EKLSWFESVLKKIDNKIGPAGEQT"
     CDS             29383..31053
                     /codon_start=1
                     /product="hypothetical protein"
                     /label=hypothetical protein
                     /db_xref="SEED:fig|6666666.356861.peg.38"
                     /translation="MKPIIALRLAGDDIPVSGLNLVLELNKCGLGFVTALTDRDVTGEL
                     VRLDLGYNTSVYRWFTGFVERCAPAENGAQRLFIRELVGVFERHWPISLQHPTLRDVIK
                     QLESSTSMRFSLPAARYVDTPIPHFTHSGSGYLLLANLGRAFAIPDYTWFQLPDGEVYV
                     GSYADSRFADSPVDVPNEFSTAGGAGNTQTLPVIPAIRPGVIVNSRRITKVAIDNDEMS
                     LTWTPLNASGKPAQKPPAQRQIEQHYPELSAGLHLPRLARVMSTNDSAALGDQSDPFRP
                     RYAVNLQLMDENGNPAADTPEYHAVPLPVPMAGAEGGMFQYPPAGSVVEIGFAEGRPDK
                     PVIRQTMQDGMALPDIKPGEQLQQQRAGVSQRVTTDGSWQRETDQTIQERSSQRHVTSD
                     AETRTTTTRTTTVNGTDTTTVLGTHKLLAGAVVALADGDYAIGTSANMLIRSSKDRNDY
                     VGQNYHSEVAGALTERIAGIRRSVAAQQELIAPSIRLGNDQLNVLTLLTDTLDVLHTLA
                     QQTANHTHNNTGTPLNAEAINGTGQRATALSEKYGPFIA"
     CDS             31137..31391
                     /codon_start=1
                     /product="hypothetical protein"
                     /label=hypothetical protein
                     /db_xref="SEED:fig|6666666.356861.peg.39"
                     /translation="MSFRDRSTIARAGVLSPHTEAPARRKARYTAPACTIWIMKILQKK
                     SGANHTASPRGGWGSGVWALLHGTQGFAAFCKIRRMTPA"
     CDS             complement(31422..31544)
                     /codon_start=1
                     /product="hypothetical protein"
                     /label=hypothetical protein
                     /db_xref="SEED:fig|6666666.356861.peg.40"
                     /translation="MQTLPTTLSPCKPRPHWISRISAKITTSKFVHKKSDENRK"
     CDS             complement(31657..31818)
                     /codon_start=1
                     /product="hypothetical protein"
                     /label=hypothetical protein
                     /db_xref="SEED:fig|6666666.356861.peg.41"
                     /translation="MPLLDYIKKYYNGNQASFARLTGVQPAQVTQWLEKGFIVVDHTLY
                     SPRRKLGI"
     CDS             complement(32285..34567)
                     /codon_start=1
                     /product="Pyruvate formate-lyase (EC 2.3.1.54)"
                     /EC_number="2.3.1.54"
                     /label=Pyruvate formate-lyase
                     /db_xref="SEED:fig|6666666.356861.peg.42"
                     /db_xref="GO:0008861"
                     /translation="MTELNEKLANAWQGFSKGEWQDNVNVRDFIQKNYTPYEGDESFLA
                     GATKATSALWDSVMEGIKQENRTHAPVDFDTNVAATITSHDAGYINKGLEKIVGLQTDA
                     PLKRALIPFGGIKMVEGSCKVYGRELDPQLKKIFTEYRKTHNQGVFDVYTPDIMRCRKS
                     GVLTGLPDAYGRGRIIGDYRRVALYGIDYLMKDKFAQFTSLQSKLENGEDLEATIRLRE
                     EIADQHHALSQIKEMAAKYGCDISSPATTAQEAVQWTYFGYLAAVKSQNGAAMSFGRVS
                     TFLDIYLDRDLKAGKITEEEAQEMIDHLVMKLRMVRFLRTPEYDELFSGDPIWATESLA
                     GMGLDGRTLVSKTSFRFLNTLYTMGPSPEPNMTILWSEKLPQSFKNYAAKVSIDTSSLQ
                     YENDDLMRPDFNNDDYAIACCVSPMIVGKQMQFFGARANLAKTMLYAINGGVDEKLKMQ
                     VGPKSEPIKGDVLNFDEVMERMDHFMDWLAKQYVTSLNIIHYMHDKYSYEAALMALHDR
                     DVFRTMACGIAGLSVAADSLSAIKYAKVKPIRDEDGLAIDFDIEGEYPQFGNNDSRVDE
                     LACDLVERFMKKIQKLNTYRGATPTQSVLTITSNVVYGKKTGNTPDGRRAGAPFGPGAN
                     PMHGRDQKGAVASLTSVAKLPFAYAKDGISYTFSIVPNALGKDDNVRKANLAGLMDGYF
                     HHEASIEGGQHLNVNVMNREMLLDAMENPEKYPQLTIRVSGYAVRFNSLTKEQQQDVIT
                     RTFTQSI"
ORIGIN
        1 ttagtagatt accttgtgac cgtagctttc cagaatcgat ttaacgcgat ccatcgtatc
       61 ggctttcggc ggtttaacac cgtctaattt gtactcttcc cccatcgcta cccacttgtg
      121 tttaccaagc tcatggtacg ggagaagctc aattttctcg atgttcgtca tatctttggt
      181 gaattcgccc agcttgtgcg tggattcatc gtcatcagac cagccgggta ccaccacata
      241 acgtatccaa gtgcgctggt tgcgttttgc cagatagcga gcgaaatcca gagtgcggtg
      301 attcgatacg ccaactaaat tctgatggat atcatcgttc atttgcttca ggtcgagcat
      361 cactaaatcg ctgacgtcca acagctcgtc aatgacggga tcgtagcggc gtacaaatcc
      421 attggtgtcc aaacaggtgt taatgccttc atccttacaa gcacggaacc aatcgcgtac
      481 aaattcggct tgcagaatgg cctcgccgcc tgatgcggtt acaccgccgc cggatgcatt
      541 cataaaatgg cgataggtca cgacttcttt catgagttct tcaaccgtca cttctttgcc
      601 gccgtgcgta tcccaggtat cacggttatg gcaatacagg cagcgcatca gacagccctg
      661 aaagaagata atgaaacgga tgcctgggcc atcgacggtg ccacaggatt caaaagagtg
      721 gatgcgaccg attactgact ttacagcttc agctatatcg ggtttttctg ttgaaaaaca
      781 agtatttgag ttattcatat gataccaatt agagctaagt ggtgctgatt catggacatt
      841 atatggacac tccgttgagt ggatttagca acacagcatc ttgtaagaag tctggcgcaa
      901 agtgtgcata gaccatcgtt tgctggatcg tggaatgccc taaaattcgt tgcagtgtaa
      961 taatattacc cccattcatc ataaaatgcg tggcgaatgt gtgccggaac acatgcagtg
     1021 cttgcccatc tggtaaatca ggtttcattg cacgtaatgt gtttcttact gcgtcgtaat
     1081 ttggatgaca tacgaaaccc gttttagcgt gctttatttg tgtcatcagc gccggagata
     1141 tgggaatggt tctacgtttc ccatttttgg ttttcataaa cgtgagcata ttgttgataa
     1201 tgtgttcaca tttaagattc gcgacttctc cccatcgtcc tcctgttgcc aggcaaacca
     1261 gaacggcttt gcggttatca ccatccagca actgaagtaa gtcttctatt tctccggcag
     1321 tcaaaaacgc catttcggct tgctgttctt tcaactgctt cacatcttta aacggatgct
     1381 gggagtgata ctcatcggct tcaatgagct tcgtaaacat tccgcttaaa atggcatgat
     1441 gccgattaac acttgatggt tttaaacctt cattcaacct gtttacgcgg taatccagaa
     1501 ttgctttttt cgttagctgg tctgcacgta ttacgcccac ctcagccagt ttcacaataa
     1561 tagcgttcaa tcttcctttc tcaatttctc cccgatcgtg acttttaccg tggtaaatcc
     1621 accaaaggga tagcaattca gtcagttttc ggcggtctgc tggcttttct acccaatctt
     1681 tattgtggta gttgaccaaa atgtgacgct caaaaatctg ggcttcgcct tttgtattaa
     1741 attttcgccg aatgcgtttt ccttctgcac cctgcggcct aacgtccact tcataacgac
     1801 catcatcaag tttcttaatc gacataagat aactctccga tgaaatgctc atcttgaaaa
     1861 tcaatatcaa aaaggtagga aaagtaaata tttagccaat tttgtgatcg gattggtgag
     1921 attttgtttc gtcttgccca atgtgtgcga gggccggtgc tatctgccca gcttctgggt
     1981 tggtttcatc aaacatgaac cagtcacgat attttctgaa tctagggtgc tttagtagcc
     2041 gcacaaccgc atcatgtgaa attgaagatt ttccattttc atacccaaca tacgtgacgt
     2101 aattaattcc tgtcatatca gctacttctt tcttttttag ccgttcagac tcacggatca
     2161 gttttaactt ttcttgaatc ataattgaca taatgaatca gatctcttat ttttaatcaa
     2221 aagcaaaacc cagaagtaca ctagatagtc ctaaagggtt ctagttagaa gtacgggtaa
     2281 ccatgtcgga ggataacaaa tgttagacga ggctaaaacc attcttgagg gggaggggga
     2341 cgatacggca aacactacgc cgcgtcgtca gatccgattg tcagagaagc ctgccgatct
     2401 cttgtcaaaa gaggggtttg ctctgtatgt cggtaaaacg acatccgcta ttgttgccat
     2461 ggctaaagcg gggaaattac cagcctttta tatggctgac ccgctaaagc caggtggtaa
     2521 tgctgagctg tggattcacc gcctagagtg ggataaatac gctaagcagt tggttgaaac
     2581 cgccccgcca gaatggcatg gctggaaaga tagaattagt gccagtaaac cgacccgccg
     2641 ccatcgtggg gtgtctgcat gagcggtgaa ttaattaaag tcagcgaaca taccagtgtt
     2701 tatcgcggct tctctattat tcgctgtcct agaacagcaa ccaatccgat aactcgttat
     2761 cgcataagtc aaggcgatca atctttcggg ctatttgatg cactagggca ggcgacttct
     2821 tatattaacg aactgcacgg catgaggaat tcagcatgat tagcacagcg cgtttattaa
     2881 aagaaaaatc accatccccg caagaaaata aaggctggct ggaattacca aacggccagc
     2941 gtttccagcc tactcccgcg caagcttatt ttgcgccgtg aagcaagaaa ccctacatgc
     3001 cagcgcctaa gcaaaagcgc cgctggtttg cccgcctgat gggtattgcg gcgtaactgt
     3061 catggctaac accgaagccg tccgcgccgt tccactgagt atcgcggcta gaactgacgg
     3121 gctgaatcac atagctatgc tgaggggaaa acacttcaac acaaacagtg aaaaagacat
     3181 gtgccgcttt attgacgata tgcgagataa gatagacggc gattatcatc aaaatatgcg
     3241 cgtactgtca gcgatatttg aattagcaga tattgataag gaacggcgta acatgaaatt
     3301 taatgaactg acaactgaag aaaaagcaaa gctgattaag gcgatgaata aacttaaagc
     3361 agttgtgagt ttattcccca aacatttaat tctttaaccg taataactcc cgtttttaaa
     3421 ggcgtaaacc cgccgggctt tctattacct gaaaaaagga aatcacgatg agaaatgcag
     3481 aagttaaagc gatgcaagta gctggcaatg aagcacttgt ttcactgctg ggaaaggctc
     3541 gattggatga aaaaaaagac cagcactggt cgtttgctca acgtctggca gcgctggccc
     3601 ttcacgcgca gcaaaaagaa tattccgcag cagaggttat cgagctgctg cgcaaagagg
     3661 cagaacactt tgagcattcg tcacaggaga tcatcgtatg aaccacgtca tgattgatat
     3721 tgaaacaatg ggtaagaatc cccgcgcacc tattgcctct attggtgccg tgttctttaa
     3781 ccctaaaaca ggtgagttgg gtgaacaatt ctattgccgt gtcgattttg aaaacgacat
     3841 gctcaatggc gcggtgacag atagcggaac tatcaaatgg tggttgcgcc agtcgccaga
     3901 agccagcgct gaattaatta gtgatgatgc gaccccgatt tggggggcga tcagtcagtt
     3961 tagtgactgg ctgactgata acgctgaaag cttgaaaacg ttaaaggtat gggcaaatag
     4021 cccatctttt gattgcacca ttttgaagtc tgcgtttgaa cggactgaga tcgatattcc
     4081 gtggaattac tggaatgagc gggacgtcag aacgatgaaa gaagttgggt tcgccatcat
     4141 gaatatgggg cgttttctcg gcacagcaga aaccatcggc gttaagcata acgcgctgga
     4201 tgatgctatc aaccaagtgg ctttggtttc tgctgttatg tctcggttgg tcggtaataa
     4261 gccggagaaa ttaggcggct gcgactggat tgattggaac gaattaagca aacgagggct
     4321 attggcccgt attaatcatg aaattatgca cccaatcggc ctagctattt tccgcgatca
     4381 agaaacgggg ggatcgggtg gtgcattaat ttcccctgat ggcaaatggg agtatggcaa
     4441 aaatctacat gagccattaa gtaacttgat attcagtgaa gttgctgatt tttttgctgg
     4501 cttagagcaa cctggtgcgc cacgttcagc cgcagatatg caaaaggcgt tgctttgtcg
     4561 cttggagcgg gtgatacgcg cgaggacgcc gcaatgatcc gcccgttcat caaatgggcg
     4621 gggggcaaaa cccgcgtcct gcctgatttg ttgccactct tgccgaaagg cgattgtctt
     4681 gtagagccat ttgttggcgg tgcgtctgta ttcctgaata cggactatcc cagctatgtg
     4741 ctggctgata tcaatcctga tttaattaat tgctatcgtg tcgctactac tgatacggac
     4801 gcattaatct caacggcaaa agttctattt cagcatggca ataataaggc tgaatacgaa
     4861 acccgccgcc gtagcttcaa ctatcaacgc agtacaggat atggaacagg gatagagcag
     4921 gcagcgttat ttttatatct aaaccgtcat ggttataacg gcatgtgtcg ctataaccgt
     4981 gaaggcggtt ttaatattcc gttcggtaaa tatcgtgcgc cctatttccc agagcaagaa
     5041 ataaggcagt ttgcggaaaa agccaatgat accggcgcta tatttgtttg tgccgacttc
     5101 aaggaaaccc ttcgtgttta tgcagagccg gacactgtaa tttattgcga tcctccttat
     5161 ttgcctgtct ctgacacagc aaatttcact caatatcatc attctgcctt tacgcacgaa
     5221 catcaccgcc aattggctaa atatttaaag cacgttcgtt acgaaactga cgcggcggta
     5281 gtcatttcaa atagcgatac accagccacg cgcgagattt atcagcacta tcaattccat
     5341 gaagtcagcg tcagccgttc gctgggcgct gccgttgcat cgaggaaaaa ggccagggag
     5401 ttaattggcg tgctgactgc ggggatgttg cgcgatgcat aataatcttg ccccattcac
     5461 tcttaattgg cgctgccgtg agccaaatat catcaacgtt attagcgtct cagggggtaa
     5521 agacagccta gctcaatggc tgttagccgt aaagaacggc gttagtcaca ttccggcatt
     5581 tgctgatacc ggtcacgagc atcctcagac tatggaatat ttggattacc tggaatccaa
     5641 actagggaaa atcagacgtg tccatgccga tttttctcgg caaatcgcag gtaaaagaaa
     5701 attcattgcc gaaaagtggc ctatcacgct tgtttcagaa tgtggtttta ctgatgtgca
     5761 ggccgaaaac attatcgcta ctgcgttaga taccctgcat cctaccggta tcccatttct
     5821 tgatttgtgc atgtggaaag gccgctttcc atcaacgaaa cgccgttttt gttcaactga
     5881 gctaaagcat gaacctatcc ggctacaagt tgttgaaccg attgttgatg cggggtttga
     5941 ggtcgtctct tggcaaggtg ttcgtgccga agaatccgcg tcacgcgccc ttttgtcaga
     6001 atgggaaagc ggctttgatc ttggccctcg tctgagcatc tatcgcccca ttcttcactg
     6061 gaaacacgct gatgttttcg cgttagcaaa acgacacggc atcaagccaa atcccctcta
     6121 tgagcaaggc tgtagccgtg tcggctgtat gccgtgcatc catgccagaa agtcagaact
     6181 tgcagaaatc ttccgccgtt ggcctgaaga agttgagcga gtcgcgcgct gggaacgcct
     6241 tgttgcggca tgttctcgtc gtcagaactc aacattcttc ccctcaacaa acgatcccaa
     6301 aaaagcagag cgccgcattg agtgtattag cgtcgagtct cacggtatcc acacctacag
     6361 agattgggca ttaacaacta gggggggggc agcagttcga tttattgggc gaagccgccg
     6421 atccgatggt ctgcaacagc gtttacgctg gggtttgtga gtaatgtccg aacagtgggc
     6481 ctatccgtgg aatgcaccac gtccagcgat ctccatacca caggggatcg cagattcatt
     6541 tctttcctct accgcaaatg ccactgagcc gcatccggct gtcgagcgtc atctcaagcg
     6601 gttggtatca cgcgccgctt tctccgatct ggatttcgag caggccgtcg cgcggctgga
     6661 atacttcgag cataattcaa cattactgac aatgcgccgc cagttcgcag aagctgagcg
     6721 ggacgagcat caagcgtcat tacaaaactg gatggaaacg ccggaaggtg tcgaaactcg
     6781 tttactcgaa caaccgtttt ttatccgcga tacctacagg aaaaaaatag aatggctgcg
     6841 cgctaaccgc gagccgcgac acgtcagcgc ctttttcatg ggaaccgtga aaaaagccct
     6901 gctgcgtctt gatgccgtgc gtgtcaagca aggtgtgcgt gacggtttta cgtcagagct
     6961 tgccagctac tggcgcgcac gctggcagca tttggcagag tttacgaaac atgaagcgat
     7021 taacgctggt catgctattg cggccagcat cactgaaatg tttgaaaccg aatgcggcaa
     7081 caccttgcca tctgatatga ccaatgacga gatccagtcg cttttctggc atttggggca
     7141 tgaaatgctc gcgttgcggg taacgccgcc gtgctggggc gtgatcattg gcgataacga
     7201 atcaaaaaaa cgtatttgct ccgccattct gcgcatcatc agccctgaat ggtgggggcg
     7261 taagttgtgg cgtttgcgct gcgaatggcg agaaaaccag ttccgcgcca tcggcgtgat
     7321 ccataaaaaa cggatgcctt acgtcagcat tgatgcactg aatcagtggc aggagcagcg
     7381 ccgcaaaaac cgtgagttct ttaaggcgca tgaactggtt gatgaagatg gcaacgtcgc
     7441 atcgctggaa aatatggtat acgccagcat cagcaatcca gttattcgcc gtcacgaact
     7501 catgacgaga atggcgggcg ttgaaatggt tgccatatcg cgcagtgacg agggtgtttt
     7561 tcttacaatc acttgcccgt cgcgttatca cgccactatt cagagtggtc atcaaaatcc
     7621 caagtgggat acgtcatcac ctcggcaggg acagcgctat ttatgtaaga catgggctaa
     7681 agccatgtcg aaactgaacc gacgcggcct gcgtccgtat ggctttcgcg ttgccgaacc
     7741 gcatcacgac gctacgccgc actggcacgt attgctattc atgccgcccg aagatcggaa
     7801 agaaatcact gaaattctgc gcgaatactt tattgctgta gaccgcgcgg agctggggcg
     7861 taataccggt gcgcgcttta aagcgaagcg cctcgatccc caaaaaggca gtgctactgc
     7921 ctacgtggcg aaatatatca gtaaaaacat cgacggctac gctcttgacg gtgagcgtga
     7981 taacgaaacc ggaaagcctc tgcgcgaaac cgcacggttt gcgatggcct gggcatctca
     8041 acataacatc cggcagtttc agccgttcgg cctgccgcca gtcaccgtct ggcgcgagct
     8101 gcgcaaactg gcgaaccaac ttaccgcagt gcagaaagaa gccggaacct tcaggcgtgg
     8161 ggcttctcag ttagctgatc cggcaatgga tgccgtgctg gcttcggctg atgcaggctg
     8221 tttcgctact tacatcgaaa agcaaggcgg cgtgctgatc ccgcgtgagc tttacaccgt
     8281 gcgcatcgcg tatgaggaag ctgacgagca aaacgattac ggcgaaacac cggaaaaaat
     8341 ctttggcgtt ttctcaccgc gcttaggtga gatatcacgt atctgtactc gtcttgttaa
     8401 gtggaaaatc cgcaaaaaac aggcagcaga cgcaggcgtt aatgatggcg ctgatcgtgg
     8461 gttggccgtt acgtcgccca ccggcgacgc ttggagttct gtcaataact ctacgggcga
     8521 tgaaaaaata agcatttccg aacccgccga tagagagatt ggcagtacgt cagagccaga
     8581 aattaccgac tttgagcaca tgaccgacac ggaacggcgt ggattgctca accgtcttcg
     8641 atctcagccg ccggatcggc gacataaaga acactcgtcc acaactcagc cccataaaga
     8701 gactgaaaaa cagactgtta gtaagcggtc ggacgactgg cgcaccagcg ttgccgattt
     8761 cgcccgttcg ctgggttggg atatcagcgc cggtgagctg cggcggttgg aaaccggcaa
     8821 cgcgatcacg attgcgggct atgcctacgt tgccagcgct gacggctgtc tgtaccaagc
     8881 gccgatgaag aagcaaaaag acacggaata tcatgataaa gctgcggcac tactgcaacg
     8941 tatcgcagtg ttatgtgaag cgacatggtc tgaaactacg tcgcagaggt atagataaaa
     9001 acagataggt gatactaaga gatatcatat tgatatcttt ttcttgacgc gtgatatcaa
     9061 tatgatatct ttaactcagc tcgataacgg gctcaaatta aacttaaact taaacttaaa
     9121 cttaaactta aacttaaact taaacttaaa cttaaactta aacttaaact taaacttaaa
     9181 cttcaaatta acttcaaatt aacttcaaat taacttcaaa cttaggaact atccaatgcg
     9241 aaatttagta aatataaacg cattttttct tttgcgaata tgaacttaac aaagaaagag
     9301 aggttaacca ccaaataaca ggagtagaaa attatgacag taaacgtcgt taaaaaaacc
     9361 ggagattttg tccttagatt aagagagaaa gattctctga gcgccatcag cggtcgcacg
     9421 ttggagacgt tgatagacgt aacaggcatg acaaaaaccg aattggctca tctggcattg
     9481 cgaagattgg ccgatgcact tttgccacat tacgagaaag acgatggggc attatccatc
     9541 gctcaaatcc aaactatccg agagttctct actgctacgg atataccgga ggagcgattt
     9601 actaaaagtc ttttgtaagg agacataatg ataagtggta caacagtata cggcactctc
     9661 cctgagccag gtgatatcgt ctggtgttac tttcctcagg taaaaggaaa accagggcct
     9721 aagccacgcc ctgcgttagt tgtgaaggtg gcggaagaag ataatgctgt gatggttgtc
     9781 tacgggacaa gccagaaaac ggataaaatt ttcgacactg aatttgtgct caggtgtgat
     9841 gatgctggtt ttgcaatctc tggactcgct tacgatacaa aatttgatat gagcactctg
     9901 gtaacattgc cttatacgaa cgagtggttt gatattgccc cgatgaaagg ggggcagcta
     9961 ccaatctcac ctgtgatggg aacgctgcac cctacctata ttttggctct aaaaaaggcg
    10021 agtaaaaaag gctcataaga attagacggc ctaaatgtag agagaaagcc cgcattagcc
    10081 taaaactcta gaaggcgtaa tgcggtgctt tacgtgccat gtccactgag caagttgaga
    10141 gcgaattgtt tttcgtcggg cttgagttgg tcaattaaga atttaaccag cttgttgccg
    10201 gttaacccac tgggactaag agtgtgagaa aacgaggcgt taaaaacaaa cgtgtgaccg
    10261 cattcaactt cggtacaggc gcagtataaa tccgctagtt tcttgtcttt ccagtcagac
    10321 ttacgaatga tggctggtga gccgcattca gggcaattaa ttttaaaaat tcgcatgttc
    10381 accatcccgc acgctattcc taacaatgga catgatttta acttaattgc gctcattttt
    10441 cgcccttatc atcggtcatt ggtgaggttt caacgttaaa ctgtagatgt aaatgcgctg
    10501 ggatctcgct gtccgtattg acgccattca taaattttcg ttgcagcggg atgacttcat
    10561 cctttcggta tgtcgtgcgg gccgtgtcag ggttgcccat tactgcgccg tttgtgggaa
    10621 taatgcccgc gaggccagcg gggaagcgat gagcggtgaa aatatcctgc gcggtgatcc
    10681 ctttgatgtt ggcaaactca tcttttgcgc taacctcccc aacgggcagg attttaaccc
    10741 cctcggggtt gcctttcggg atgttaataa acatattgcg gaagttgcct agcccttttg
    10801 actccgcgat cttggtctta atttcatttt ccatttccag cgtcagatta gggtcactgg
    10861 tataaagaat gaagcccatg tgcgccccgt tgttgtagta acggcggcgg aaaatggtcg
    10921 cttcgctgtt gagcaaggcg gaatgaattc ccccgatgta atccggcagg ccgtaaacct
    10981 gctggcgcgg gtcgtacatt ttgaaaaaga cgatatcttc aggttcataa atcagggctg
    11041 gcccttcctg aaggatgacg aaagaaccct ccttacggca gcgcaggtaa agcgagggca
    11101 gcggcagcag gtcgatcact tccccaaaaa cattgcggat cttcaggata gcaacatccc
    11161 cgaacagcag ataatcaaac gccatttgtt cgacctggtc agcggttaac ccgccgctga
    11221 tgtagccact tgccaccatg tttcgccgtg catacagtac gccgccgtgc tgtgcattga
    11281 ggttaggcaa ctgcgacagc gccaggcgat cgataggtaa ccgccagtgg ttatattcat
    11341 tgtcatacca gatattgtgg taatccgtgc cggttgtcag gatgggttcc ggttcgccaa
    11401 aggtgatcac gctgccgcgc cctggcgtga acgtctctac gttatttcct gttgcggcct
    11461 tgaatttctt attctgtctc tttgtcatgc tgcttccccg aatgcccagg ttgatgggcg
    11521 gtcaaattcg tgatcgatag gttcattaat aacggcgtgt gagatggcga agaacacatc
    11581 cgcgtggccg gttgcatcgg agcgttctgc aacgaatgtc agtgcgttgc cgctgttggt
    11641 cgtggtgcgc cggatagcca taaatgacgc tgggatttcc gcgcgctctt tattggtttc
    11701 gtcgatagcg tcttttgccc attcaatacg tttacgttcg acaacgtcga tcatcttcat
    11761 gaccaggcgg tttttacttt caacgctgta aagaatggcc gtggcttcac ggggcgcgaa
    11821 cttgctgact aggtcatata cccctttacc gatgccggtt gtgtcgatcc cgatatacgt
    11881 gatgttgaaa cggcgcatga gctgttttat ctgatcggcc tgccagctaa agttaagccc
    11941 ttgccattgc cagatagcca gaacgcggaa gcgctcaccg tcatggatcg ggggcgcgat
    12001 tattacaaac gtggaattat caccagagcg ggacgggtca aagcctgccc agacttcgcg
    12061 gttgccgaat ggccgtgcgg cggtggggtc atagtcaccc cagattgcct tatccacttc
    12121 gcagccaacc agagcggcga acttgaatac cgcgtctttg ctgtcaacga actggcacat
    12181 gtagagcatg gcgaacgcgg tcgggttgta tttattgcgc aggcgatcga tgtcaacgag
    12241 cgcacccagc ccgcccgcga tagcgtcttc catcgtaatg acataacgcc agatgccatc
    12301 agggcaaata atcccctcgc gcatggcact gtctttcgga aactcaatgc ctttacgctt
    12361 cggatcgtca ccgcgccact catcgccagt ccagaccgga tacgcctgat gtgttttggc
    12421 gctgggtgtt gaaaagtagg tcgttctaaa tttgttatgt gtcgccatgg cgcttgcgac
    12481 ttcatgcagg cgcgtgaatt tcgggatcca gaagacttcg tcaccataca gatgaccgtt
    12541 aaaaccctgc gcggtgctgg cgtttgtgga cagaaaacgc aggattgcac cgttgctgag
    12601 gcggatattt ttacccgtca acgtgatgcc aaaatggttc tgcgctatct ggacaatata
    12661 ctcacggaag atttcagact gggcgcggga ggctgagaag aaaacctgat tgtcaccgct
    12721 gacgacagca tcttcaaacg cttcccaggc gaaatagtag gtcatgccga tctggcggct
    12781 tttcagaatg aagcgccagt cttcatcttt gtgatcgcgg cagtgtagct ggtactcgaa
    12841 aagatgttcc tgtgcccagg tatccagcat ttcaggcgtc aggctggaaa catcattttt
    12901 cttataccgg cgctttcttt cccctggctc tccgctcgct gcactgaggc aataaccttc
    12961 accatcatag gccgcttttt tggcctgcat ttctgccatt ttttcggcgt gcttattttg
    13021 ctgcgccatt agcttgacgt ggtgagcaat cagatcccga agttcttcca gctccagcgc
    13081 ggttttcttt tcgcgccccg ttagctgatc gatgcgtctg gcgatcacat gctcgaccgc
    13141 ttcaacaggc agcagagaag cccactggcc tgtttcagcc cagtgataaa tggtgcgcgg
    13201 cgggaggttt aattcctgtg caatatcttt cggcgcccaa cgtttaatat atagggcgcg
    13261 tgccgcgtct tttatttcat cggagtattt agccatgcgg atattatgac gggaatattc
    13321 agacgaaatt atcattaaat atcggaaaaa aacggataag cgtttatatc cgaatacatc
    13381 agaaataaag cagtcgcgaa caattaatca attagtaata ctgactaccg caaacgaaat
    13441 accgttattt actttttcaa tgaaggttat tatgccgcaa tctcattacc gcactgattg
    13501 gttatgtatt gccacgtctg gacaggctgt ggacggtcgc accattgaac cgcaatggct
    13561 gattgatgcg gcagaaacct acacccgtaa aacctatacc gccatgattt ggccgcacca
    13621 tccacagtat gacattggtg agcgtgaatt tacctgcaat ctgggggaag tcgatgcgct
    13681 gaaagtggaa acggaagggg atgtcacgaa attatatgcc cagttagtgc cgaatcaatt
    13741 tttaattgat gccaatcgaa tggggcaaaa gctttttacc tctgctgagt ttgtttctga
    13801 ttttgcgggc agcgggcgtg aatatctttt cgggctggcc gtaaccgata ttccggccag
    13861 tctgggaacg gaaaaactca aattcgtttt ggctggagaa gaaaaggacg ctgagcgcgg
    13921 aaaccttgaa acgttcagcc tgggtaaatt acagacgccg gataaaaaag agtctttctg
    13981 gtcgcgctta ttttcggcca gtaaagcgtt tacgccaaca ccagagccta acactgataa
    14041 gcccgacgag ggcgaggaac aaaaaatgga agagctaaaa gccctccttc agcaattgct
    14101 ggaattggtc aaaaacggca aagacgctgc cagcggtgac gctgacgcgg ttgacacgcc
    14161 ggagcaggcc gcagaagcag tggcagacat cgccgaagag atcgccgctg ccgccgatga
    14221 ggtagccgtg ctggcgcagg acgttgctga taacccagaa gacgaagtca aagcggcgga
    14281 gttcaccgtg gcaaaagcca atctggcaaa agccatgaaa gcgttcaacg tcaccccaga
    14341 taagcgccct cgttcgcgca gtcgtcgccg tgagttttcc gcacgtagca agcctgctaa
    14401 cgatgcgatg ggcgatctga ccacgcaact gaccactgtt ctgaccaagt tgtcagcgat
    14461 ggaagacggt gggacgcgtc gtccaaacag tgcgccaaac ggcggtaatc aaccgtttga
    14521 gtttgtttaa ctgctccttt tttcaggaat aaaaagatta tgcaattaac cccaaaagcc
    14581 gaagcgctac tgcgcaaata tgccgcaggg ctggcaaccg ctaacggcca ggtggatacg
    14641 tcgcgatttt tctcgctgac gaacccaaag gaaacccagc tccgcagtgc gctgctgcaa
    14701 agttccgaat tcctgagcct gttgccgaac gtgttggacg tcaatcaggt aaccggtcag
    14761 gtcgtgacca cgggcaagcc aggtatttac accggccgta agaaagacgg ccgcttcagt
    14821 cgcccgctga gcgtgggggg taacgaatac aagctggttg aaacggattc gggttcgtat
    14881 ctgccgtatt cgctgctggt tgtctgggca aatgcgggca gcgaagacga gttttttcaa
    14941 cgtattcagg cattcagtaa cgagtcattt gcgctggata tgttgcgcgt ggcgttcaac
    15001 ggtaccagcg ttgcggacga taccgatccc gatgccaatc cgaacggcga agacgtcaac
    15061 attggctggc accagattgt taagacgcgc tccgctgagc aaatcatcgt tgacgacgtg
    15121 acaattggcg gtgccggtgc tgactttatc ggtctggatg ccgcagtcac cgatctggtg
    15181 cataactgca tttatgagcc gttccgcaat gatccgcgcc tgattgtgct cgcgtccgcc
    15241 gacctaatcg gtaatgacgc cacaaccatg atgaatcgga ttgatcgccc gactgagaag
    15301 gtcgcggccc agcttattgg ccgtcagatt gcagggcgta ccgtatacac cccgccgttt
    15361 atgccggaag gtcgcctcgt tgttaccacg ctggacaacc tgcacttgta tacccagggc
    15421 ggtacacgca agcgtaaagc cgagtggaac gatgaccgca agcgctttga aaataattac
    15481 ctgcgcatgg aaggttatgg cgtcgagcat gacgagcttt acgcggcatt cgacaaaatc
    15541 actctggcaa ccggagaggg tgaataaaca tggccatgtc cccgtgtcag cgccaccgcg
    15601 ccagcgtgaa agccgccaag gcgctggata accgtgaagc gctggccgca tcgccggtta
    15661 gcttccatct gcaaaagctg gagctggaaa aggatgtcgc aatactgcgc agcctgccgc
    15721 gcacggaaga ccgcatcgaa atgaaacgcg atgtgcttct cccgcgctgg atgccgagcg
    15781 ttgaagccta tcttgccggt gatgcccgct tcgccaatcc ggcgctggct tactgtgtga
    15841 tctggttgtt tgacacaggg gaaatgggca aggcattgga ctgggccgac gcggcaatca
    15901 gcgagagcca ggcgacgccg gataacttca aaagcacgtt accggcattt gttgccgaca
    15961 cggtgctgga gtgggctacc ggtgaagccg ccgccggtca cagcattgaa ccgtatttca
    16021 gccggacgtt taacaacgtt cgtgataaat ggcggctgca tgaggacatc aacgcgaaat
    16081 ggttcaaatt cgcagggctg tatttgctgc gtgatgagaa cggccagccg cgtgcaacgg
    16141 cggttgatga cgttgacacg ctcgagcagg cggatgcgct gttagagcag gctgaaaaat
    16201 ttaaccgcca tgcgggtgtg ggcaccatcc gtaaaaagat tacggcccgc attcgggggc
    16261 tgaccgaaaa ataacgacta ccgcaagccg gggcgggcgc gagggaggtt gaaaactcgt
    16321 aaggttttca aggccgtgga tctcggtctg cccgcttccc ctacttgcat taatgaggtg
    16381 tgacatggcc gtgccatccc tggggtttag cggaaaaccg attgattatc aggatgaacc
    16441 catcgttaac ggtgtcgcgt tctggcccga tctcaatctg gcggagtttc agcgctcacg
    16501 caccattccg cccgatctgc ctgcgtctac ggcggcacag gcgctattgg cggcggttgc
    16561 agaggtgaat gataacctcg gtgatgtagt gatttactgg cgtgaacggg gtcatgagca
    16621 ggccattgat gtgccaggcg cacgggcagg gaatgaaaat caactgaccg cgcaatacaa
    16681 aaaggcgatt tatgcccgcg ccaaagccga tttactgggc gaattcgcca gcattggccg
    16741 acgcgaaacg cacccaggac aggagagcgc tgagacgcga gacattctgt tagcagaagc
    16801 cgcctttgtg ctgcgaaaca tgcaacgtta tccgcgcgtt ggggtgcatc tgatatgagc
    16861 cagattgaaa gtctgaccgc ctttttaacg cagaacctgc ccgagcgggc tatgcagcag
    16921 tttgaaagtg cgctggacaa tgcggagtta atacccgcgc ccaaagcgct ggggctggaa
    16981 cagcgccgga taggggtatt tcgctaccag gcgatattga actggggatc gttcccgtat
    17041 cggatttgcc cgcctgcgca ggtttacgca ctggtgctgg catggctggc tgatagccgc
    17101 aacgagctgt atgacgaact ggtgctgtcg ccgcccagcg ttgacattga attcgatgaa
    17161 gaagtgtcct ccccattgga gatcgtcgtc gagctggctg acagcatcaa catccggcca
    17221 agcgaaacgg gcgatatccc atttggcggg caacgctggg agctggccga tcctgagcta
    17281 tggacggcgt taagcggggc actgtatgcc gccgacgccc acggcgcacc gctgagtgaa
    17341 tcgtaatggc ggtagctgtt cagggcgggt tgccgcagcg acagttacgg caattgcgtg
    17401 ccgcgctggc atcactggaa ctgccgccga aaaagcgcca gcggctgctg tggcgcattg
    17461 ccaagctggg ggtcattgtc gcggccaagc gcaatcagcg taaccaaacc agcccagacg
    17521 gccagccgtg ggcaccgcga aagcggggca aggggaaaat gttgcgccag ttgccgaagc
    17581 tgctacatgt gcgcgaaatg ccgcagatcg acgcagtcag aatttatctt cagggcgggc
    17641 agtacaaaaa cggccaggtg ccggtttcag ccggattgat tggcgcagta caccagggcg
    17701 gtgcgtcatt ttcaatgagt gccgaccgtg cgccacgccc cgatcagcgc aaccggcccg
    17761 cgttgcccag gcaggctaaa aaattacgcg ctttgggtta caaaatgcgc aaggggaatc
    17821 ggtatgtcaa agcgagtagc aaatacattc tcgacacctt gagcatggcg caggcggggt
    17881 tattgataaa aaaactccgt ggtgagccaa caaaaacgac ctggaaaata gatattccct
    17941 cgcgtgtatt tttgggcgtg agtgatgacg aatttaacaa gattttggcg cgtcagttgc
    18001 aggccatcgg gtttggctgg gacgtcaatg cacaggacag cgggggataa catgacctgg
    18061 cctactatca caatcaatca gctcaatcag cttcagggcg aaacaaaaga gatcgagcgc
    18121 gtggtgctgt tcgttggccg tgcggtcggg gatgcgatcc ctgtcacgcc ggtaaacacc
    18181 cagagcaatc tggatagcct gctgggcgct gaagactcaa cgctcaagcg ttgtgttgag
    18241 gctgcgcggc tgaacgcagg gcagaactgg agcgcgtttg ttgtctctat ttctgacgac
    18301 gaactggacg agcagcccgc cgccgaggtt gccaaaatct gggcgcaacg ggttgaaaac
    18361 gcgcaggccg tcgccagcgt ggaaggggtt gtcgtcacgc tggaggcgac aaaatccacg
    18421 attgccgctg ctgccagcct gcgtaccacg ctgatttcaa aatatggccg ctgggtctgg
    18481 ttcatcctgt ccgttagtgg cctgcaagcg ggtgaatcgt ggacggtgta cctcgcccgc
    18541 ttagcggatt tacagcgtgg cgacgcggtg ccctcggtgc aactggtgcc aaatttgtgg
    18601 ggcagtgaag cgggcgtatt ggcggggcgt ctgtgtagcc gtgccgtgac cgtcgcagac
    18661 agccccgcgc gagtacgcac agggccgtta attggcatgg gcaccgtatt gcctgttgat
    18721 agtgacgata tgccgctagg gcttgcgacc ttgcaggcgc tggaagccat ccgctacagc
    18781 gtcccgatgt ggtatccgga ttatgacggt atttactggg ctgacgggag aacgctggac
    18841 gttgagggcg gcgactatca ggtgattgaa cacctgcgca ttgtggacaa aatcgcgcgg
    18901 cgtgttcgtc tccaggctat cgcaaaaatt gccgatcgct caatgaatag tacgccaggc
    18961 agtatcgccg cccatcagac gttttttgcg cgtcacatgc gtgaaatgtc ccgcagtagc
    19021 cagattaata acgtcacgtt ccctggcgag gtgcagtcac cccgcgaggg ggatgtggtg
    19081 atcgcctgga cgtcatcggt cgccgtggcg gtttatctca cggtacggcc ttacggcagt
    19141 ccgaaatcaa tcacagtggg catcatgtta gatgccacgt tggaggcata acgatgacac
    19201 agcgaatcgg cgggcagtcg tttgatattt cgctcggtac tgagctggta cacgtcaaaa
    19261 ccgcgacatt ggatatcacg gataacactg ctgtatcaca aacgcgcggc attccagacg
    19321 gtttcgtcgc gggtgatgtc ggtgctgaag gtgaaatgga atttgatacg aagaatttta
    19381 aaaaaatcac cgcactggcg cgtgtagcag gcagttaccg cgcgatcccg acctccgata
    19441 ttttgtttta cgccaacact ggcgatgaag aattcaaggt tgaggcgttc gggtgcaagt
    19501 tggtcctgac ggggccggtt gcctttgatc cgaaaggcgg ggagacggcg acgcataaag
    19561 tgaagtatct ggtgaccagt cccgattttg ttcggattga tggcgtgccg gtactgtcgg
    19621 aaacggatat tcgggatctc attgggtgaa ttatgccaaa cggtgaaacg tcattttttg
    19681 caaatttatt gttggtgggg gcggcaatcg ggctggggaa actgctggtc agcgaagaac
    19741 ggatcacgtt tcgcctgtta gtgggccgca ttattttagg ttcggcggcg tcaatggtcg
    19801 cgggtgtggc cctgatccag tttcctgagt tgccagaact ggcggtattg ggattggcct
    19861 cggcgctggg gatcgccggt tcaaccgcga ttgaagccat cattgaacgc aaactgagag
    19921 catcacgggg gaattcatga gtttaagcgc aaaacaagcc acgtttacgg tcatggttgc
    19981 acgcctgatc acctgggcgg cagagaacgg ctattcactg acgttcggcg aagcctatcg
    20041 gacggcggag caagccgcta tcaatgccaa atcgggggca ggtatcagta acagtctgca
    20101 cacccagcgt ctggccgtgg attttaatct gtttgttgac ggtgtgtatc agtcaagaac
    20161 ggaagcctac accccactcg gcgagttttg ggagtctatc ggcggcgcgt ggggcgggcg
    20221 ctttacttct cgtcccgatg gtaaccattt tagcctggca cacggcggcg tgcgctgatg
    20281 aaacagctac tggcgttcgt ggtggcggcg tttctggcgg gctggtatgt caacgacttg
    20341 cagcacgata gcacagagtt gagcatcacc cgtgcggcta ccgccgccgc taatggcgtg
    20401 cgtaccagcc tggaagacat cgccggtcaa tcggggcggg tgctggaaga aaaattacag
    20461 gagctacgcg ccaatgagca cacccaagac cgtgtttttc atacggaaac ccttaagcct
    20521 atttttctta atgtgtgcgc tagtgatgag tatgtccggt tgttcaacga cagcgcagag
    20581 caggccgagc gtgccttatc aggaaaattt gctaacccgc tgtccggtgc aactcccccg
    20641 cctggcgggt aataccggcc aggattttga tcaggcatta cgggcgtaca gcacgctgta
    20701 tagcgaatgc gccgcccgac ataaccaact gataattgaa gttaatcaac gcagagagat
    20761 tgaacaatga gcaaagaaac taacgtgatc acgttgaccg tcaacggtcg tgaactgtca
    20821 ttttcgccaa cgctggtggc gtacaacaag ctgtcaaacg aggcggcgcg tgacggtgat
    20881 gtcatcggca cgattgccac ctatctgaag cgtatcgtta cccccgatac ccgcgacacg
    20941 ctgaatgagt tgctgcaatc acccggcatc ggcacgcaga tcgctaagaa ggtcaacgag
    21001 atttacgcgc cagaggtgga gatcgaagta aagggataag cgcgctgatt gatgccatta
    21061 agggcaatca gcttgagcag tatatgacgc tgcggcgtca ttacctgccc catgacgatg
    21121 acgacgccat gagtctggcc cgtgcggcgt ggctggctga gtattttcac gaatgccaga
    21181 ttaacagtac cgccgcaggt atcgcttttg cgttcaacgg cagcagggaa taacgatgag
    21241 agagctgggc tttttattga gtctgaaaaa ccaactgagt gcgccgctgg ggcgggcaca
    21301 gcaatccgtt gaacagtttg ctaaccgcag tgcggatgcg ctggcacggg tggcagttgg
    21361 ggcggcgggg ttgtggggcg tcgctcaggg cgttaagggg ttgctcgatc ctgctaacga
    21421 cgtcaaaaaa gcgctggatg aattatcgac acgtaacgtc agcacgcagt cgctggatgc
    21481 agtttatcaa tcagcccagg cattcagcac ggcgtacggt aagtcggcgg cggagtttgt
    21541 cgcgtcagca acggtcatcc gtagttcaat cgctgggata actgacaccg agcttccccg
    21601 atataccacg ggcctgaata cgctggccgt ggcaacaaaa tccagtgctg aaggtgccgc
    21661 cagttacatg aatgacatgg cgagtaactt cagcaccgtg gcaaagcgaa tgggcaacat
    21721 tccgtttgct gaaatgatgg cgtcaaaagg ggcgtacatg gtgcagaact ttggcaccag
    21781 tctggacgaa atcaaggaat tggtgaagtc cagtaaagga accggcacac agatgggtgt
    21841 gggcatggat gagcaatttt ctgtgatggg gatgctcaag cagacaaaag gcacggaagc
    21901 gggcgggatt tatgatgcgt ttctgaaatc agcggtagag ggcggtaaac agcttggtct
    21961 gagtttcacc gatgcgcagg gcaagatgtt gcaattcccc gacatcctgc aaaagctaca
    22021 gggaaaattt ggcagctcga tcgagggcaa catcaaagca caggccgcgt taaataaggc
    22081 gtttggtgat ggtgcgcagg cattaacggc gacgtggggc caggctgata agttgcgtca
    22141 gcatatgcgc gatatgggga atacgcaggg gctggatcgc gccacggaaa tggcgaaaaa
    22201 aatggcggat atgtgggaac gtctcgataa ggtctgggag cgtatccgag tatcgatcgg
    22261 gatgcggctg atccctgcta tttcccctct tggtaacacc gtgatcgcta tcggtgaaaa
    22321 atttgctaaa tggctggata tgttcccgaa catagcccgc tggctggggt atgttgccct
    22381 gtctacgttg gcgtttgcgg cagcgggcgc gacagctaac atcgtctttg gcgcgtccag
    22441 atttatctgg acggggctgt taccgctctg gtcgctcggg actaaatcat tagcgctggt
    22501 cacggggcaa ttaaacgtca tgacctcaat cggtacaaaa gcgacaacgg caatgaactg
    22561 gctgcgctcg tcatttatcg tcaccaaagt cgctgcctgg gcggcggcga ttggtgttaa
    22621 tgcggtcatc tggccgatcc tcgccatcat tgctgccatt gcgctggttg tcatcgctgt
    22681 cgtgaagttt tggcacccca tcaaagcatt tttcaacggg tttatcagtg ggtttagtga
    22741 ggcgtccggt gcgctggcgc cactgtctcc gctgtttgat ttactgggtg ctgccatcgg
    22801 gattgtctgg caggggataa aagcgctgtt tggtagcttc tctgagttgt taacgccgat
    22861 tgcgtattcg tctgaagagt tggcgggcgt cacgtcagcg ggtgaaatgt gtggccgtat
    22921 cgttgcggag gctatcggct ggatcctggc tcctatcggc tgggtggttg aggcgtgccg
    22981 cgtgctggat ggcgtttttg ctgacctctg gtcatcgata cagctcgggt gggaaatggc
    23041 cgtgaatttc tttgcgggat tatcccctgt tgcggccttc ggtggatttg ttgacgccat
    23101 aaaaaatatt tttagtgggc tgtgggcctc gctaatggac tcgtttaccc aaacctacaa
    23161 tttcattgcg caggggctga attatctgcc tggtatcaat attgacctga agccgacctc
    23221 cggcagcaca ttggccgcac cggcaggaat aaccgcgcca ccgatgcaga acggcgggat
    23281 ttccaaaacc ttacagacca ataatcaaag cacggcaaat acgcgcaaaa cggaaattgc
    23341 cagcgtgaat atctatccac ctaacggcgc aacgttcacc agtatcgccg aatctcagga
    23401 gctggccgca ggatgagtga tgcactgtat tttgacctgc taatcactga cggtgatttt
    23461 acgctgaata ccggtaatga gccgcagttg tgtaataacc gcgtcagcat tgcacaggat
    23521 gtggttcacc ggctgattga atcaggactg gttaaacagc tggttgctga acgcagtccg
    23581 gtattgcgca gtgacatcat gttacgcatg gagctgctga cagaagaaga tacgcgcctg
    23641 gtgccaggga cggtggttat ccgtgataac ggtcgtggaa attatttcat tgacgctgaa
    23701 acgtatgatt tcggccctat ttcagtgagt gaaccattat gagtaaccgc cccaatcccg
    23761 actatgaacg tattctggct gaacagggca tgcctgttac cgataaacag atccgtgccg
    23821 agtttgacga ggttgttgcc gatgcgggca tgataacgaa tacctcccgt atgtccccgt
    23881 tttggcgatt aatcacggcg attgttaccg cgccggtgat gtggttaaag aatgcgctgg
    23941 ttaacaccgt gatgaaaaat ctgtacctgg ctaccgccag cggggcattt gttgatgtgt
    24001 tcgcctgggc tgtcaatctt gagcgcaaag gcgcggcggg agcgcgtggc gtgattttgt
    24061 ttactaaatc cgatcccagt attacggccg ttgttcctgc gggaacgcag attcagaccg
    24121 agcggatcaa cggtactgtc taccggctga caacagatgc ggattttact attgatgccg
    24181 gtatcagcag cgccttgatt ccggtgactg ccaccggtgc cggtagcggg cataaccttg
    24241 cgcctggcta ctatcgcatt ttatcggttg gtgtagacaa cattgagcag gttgttaacg
    24301 acgatgactg gctgacagcg ccaggcgcag atgttgaatc tgatgacgag ctacgcgaca
    24361 gggtgcgcaa tcagtttaat ttgcctgggc aatatcacat tgatgccgtc tatcgtggcg
    24421 cgattgcgca gattgcaggg ctgacgactg accgtatctt ttttcagcat gacgcgccac
    24481 gcgggccagg tacagccaat gtctttttgt tgctggattc cggcgttgcc agtcagccat
    24541 ttatcgatac ggtcaatgat tatgtgatgg cgcaagggca ccacgggcac ggtgatgatg
    24601 tcctgtgtat gccgttgccg gagtttgatg taccgctcgg cgtcacggtt tacctgaaaa
    24661 attatgaaaa tttcacgata caggaattgc aggcgttacg cgttaacgtg ctggatctga
    24721 tccgctgtgc attccgtcag aacaccgatt atgacgtgaa aaagacgtgg ccctattccc
    24781 gtttttcctt ttcagctctg gcgggggagt gtcaccagta ttttcctgtg atcgagtcaa
    24841 tcaccttcag tgagtcagat attgtcagtg atctgagcat tccgcgcctg tcgggtgtca
    24901 gcgtggtatt taaaaatgtc tgagttcaaa acgtggctgg atagtcagcc gctgccaccc
    24961 tggatggata aaggggaacc aatcaagctg tttacggccg taaaacaatt ttggctgaaa
    25021 acgtatgact gggtgcaatt tccattacgt cagtttgacg ctgaaacgtg tgacgtggcg
    25081 ctgcttgacg cgatggccta tcagcgtgat atccagcggt ttaacgggga gccgttagca
    25141 ctctaccgca aacgggtgaa gttcgcgttt atcaacgcgg ttgatgcggg cagcgttgcg
    25201 gggtttatca acatcttcag gcggcttgat atcggtgatg tgacgctggc tgaacgccag
    25261 cccgcacatg actgggacgt tatcctggtg caactggatg acgagcaact cggcacctat
    25321 aacacgttga tgatggattt gatccgccag tatggccgga cgtgccgacg ctaccatttt
    25381 gatgtaacga acgcggatat atcccgtatt cgtgctgctg agttcagcca tgatgccgcg
    25441 ttttacgcgg tcgatgttga cactgtgcat ggcctggtcg aagggcgaac cccaacgaac
    25501 gcccccgcgt ttacctcatc aaccgaatac tacacagcca gtcagtgagg atttatggca
    25561 cagagtattg ttacccgtgc atttgaagca tggaacgtaa aaaaaacgct ggacgggcaa
    25621 cccgccgttc ccgatcagat tgttttcgct ctcatcccta atcaggatga ggatcaggcg
    25681 gtgagccgtg atgaggggat gcccgacgcc gccgcaatca aacaccgtgc cgctatcacg
    25741 caatcgggtg tgctcaatac taacgcggtg gtctattccg ttgtgttaga caccgctatc
    25801 ggggattggg attacaactg gatagggctg gtcgatagtc aaacccaaac ggtactgatg
    25861 attgtccatg ttcgtactca gcaaaaaata aaaacgcaga acggcaggca gggaaacagc
    25921 ctgaccagaa atctggctat gcagtttgac ggggccgcag aagcgacgca gatcaatgta
    25981 tctgcgcaga cctggcagat tgatttttct gcccgcctgt acggcatgga tgacgcactc
    26041 cgtgtggctt tgttggatta ctacggcccc gccgcatttc tgggggatgg gttcaacgta
    26101 tcggttgcgg gtacgcaggc gatggtagca ccaggtgtgg ggtatgtcgg tggtttgcgt
    26161 gctgtgctgg atgctgcgga acaactggct gttagtgcga atacgggcgt atgggtggac
    26221 gttagccgtc agggaacggt gacgggtgca tgggaaaacc gtgtaacgct ccgcactgcg
    26281 gcggaactgg cggattacac tgacgaaaac ggctatgcac actacatagc gaaggtcgct
    26341 accatcacgg cggggcaggt tgttgataat cgtatggcgt cccctgtcta tttgctcgat
    26401 aagcgttttt tacagattga tgcagcggct gaaaaatatg cgccattgaa gagccctaag
    26461 ctgattggag cgccaaccgc gccgaccgcg tcgcaactga ccagtaatag ccagattgct
    26521 acaactgaat ttgtgaaagc ggcaattctg gcgttagtga atgattcgcc tgctgatctg
    26581 gacacactga aaagcctcgc tgaagcggtc aacaatgatc ctgatttttc taaaaaggta
    26641 ttaagcgcgt taacgggaaa actggagaaa gataagaacg gttcggatat caatgatgta
    26701 ggcgtctttt tgtcaaacat tggtgccgtc agcctcaata catttcaggt gattaccgga
    26761 aagaaattgc tgtctgccga cgatgacgtg ttgacgataa agcccacggc taacgggcag
    26821 cgtgcataca tccagtttaa taatgcgcag agcacagagg cgatagcgtt tgtcgggatg
    26881 cggtacggca ataacgagca ggcactaacg tttgagcacc gatcagggtc atcaatcaga
    26941 ttggtggatg gcgaagtcag cttacacgga ttgcctcgcg taacaaccgc ggcacagggt
    27001 acgaatacaa cgcagattgc atcaaccgaa tttgtgcagt ccgctatcaa tgacggcgcg
    27061 ggtattccac tgccgtggcc ccaggcagtc gccccgactg gctggatgaa gtgcgcaggt
    27121 cagtcgttta acaaatccga ataccctaag ttatcgctgg cgtacccgtc tggcgtattg
    27181 ccggacttgc gcggcgagtt tatcaggggg tgggatgatg cccgtggtat tgacgccgca
    27241 cgtgtactgc tcagtgctca aggcgatgct attcgtaata tcactggcga gatctggacg
    27301 acagcacaga atcttcagtt tttaggggaa aacctgcaat caagcggcgt gtttgaattg
    27361 ctgcatgaat ttggtgttgg cgctatcgct gatggggcgg gggattcatg cccatcacgc
    27421 atgcgttttg acgcatcacg cactgtgccg acagcgtcgg aaaaccgccc acgcaatatc
    27481 gcatttaact acatcgtgag agccgcataa tgagcaacta ttcaacacaa attaaaaacg
    27541 cagagctgaa tgaaagcggg ctggcaatca atgcgggctg gattacggtt tatcacgtga
    27601 actccgcgac acgcgaatat cagtcagcta gttatgagta cgtcatgcag ggtgttggct
    27661 tacccgctga cagctacgcc gatgaacccg agttaccgcc cgttggtcag gcgctgcgcc
    27721 gtacagatga cggaaaggcg tgggaggctg tgccagacta tagaggtcag accgtttata
    27781 gcatgaacac gcggcaggca cagatcgtta cgcagttcgg tgaactgccg gataacgtca
    27841 cgctgctgaa acctgccacc gaattcgatg tttggaacgg taaaaagtgg gttatcgata
    27901 aagccgcgca agccgccgcc gcgctcaagg ccgcacagct ggagctggcg acacgcaaag
    27961 ccgctgcgac atcgcgcatt aatgaactga cctatgccat tgatctggac attgcgaccg
    28021 atgacgagaa aacggcactg acagcgtggc agaaatacgc ggtgctgctg agtcgcattg
    28081 atgtgaatgc ggcgaaaatc gactggccgg aggcaccaca gtaaatgtgg catgaaaaac
    28141 gcctggctat ccccgcgaac atgcgcccaa tcacatgctc gacagtggtc gttcatccgt
    28201 ggacgtttgg tgtcgggcag acggtggaat ctggtgtttt tctcagtccg cccaacgccg
    28261 ttaacacact ggcgggaaaa ttggcgggta cgcccgccaa tcatgatgtc gtgatattca
    28321 tgataactgc gcccacgatt gagcaattta ttacgttgtt aactgccgcc gctgcggtgt
    28381 tcccgttgcc tgatttgacg caggttcagc gccgtgcacg ctcggcgttg agtctggcgg
    28441 taacgaaaat gcagcgcccc atgatggcag gcagtttgcc cgctgcggta ccgctgtcat
    28501 tcagtaccgc ccgctcggcc tccactgcgc aggcgatgca gcaggctatc gggcaggcaa
    28561 gcggcgcggg tatggcggat atcgccgacg cgttggcagg gtttgctgcc cagcgtcaga
    28621 cgttattagc cgcagcgggt gagacattac agcagctaca ggggatgtca gtgcctattt
    28681 gggcgttaga agtcagcggt agtgtcgaaa cggcgctgct ggacatgcgg gaagatatcc
    28741 ctaaccctga tgccgtcttg acgctgtgca tgatgtttgt tggcgaggat ttggggccgc
    28801 tgcgtgaaat ggtgacagaa cgatgaatca gattattgtg ctggcgttgg atggtgaggc
    28861 gatattgcta aaaaatattc tggtgtcgcc ctcaatgcaa attcaggata aagaccagag
    28921 cgggcaggcc agcagcacgg ccagcgcaga gcagggaatt aagggcaagg aattgcgggt
    28981 ttccggtttg atcccgtttg ctgagaaaac acagcttacc cgcctgtttg cgctggcaga
    29041 ggctaaaagt gctgacggca gcatgaagcg ttaccgcgtg gcgaatgaag tcgcccaggc
    29101 gataaagttc agggaagcaa ccttctccgg cgctatcgat gccgcgccgc agactgacaa
    29161 aatggcctgg ctggtgaatt tcacgctgaa agaatttttt agcgtggcag agcgtaaagc
    29221 ggcgcaggcc agcgccaaag gcggggcggg aaccagtgcc ggtgcaacgg cacaaacggc
    29281 cagcggaaca ggcaacgccg atgaaggtga ggaaaagctc tcctggtttg aatccgtgct
    29341 gaaaaaaatc gataacaaga taggccccgc aggggaacag acatgaaacc gatcatcgca
    29401 ttgcggctgg ctggcgacga tattcccgtc agtggcttaa atctggtgct ggagctgaat
    29461 aaatgcggac tggggtttgt tacggcattg accgatcgtg atgtcacggg cgagctggtt
    29521 cgcttagatt tggggtacaa cacgtcggtg taccgctggt ttaccggatt tgttgaacgc
    29581 tgtgcgcctg cggagaacgg cgcacagcgt ctgtttattc gtgagctggt tggtgtattt
    29641 gagcgccatt ggccgatctc gctgcaacat cccacgctac gtgatgtgat aaaacaactc
    29701 gaatccagca cgtccatgcg gttttcattg cctgccgcgc ggtatgtcga tacgccaatc
    29761 ccacatttca cccattccgg cagtggttat ctgctactgg ctaatttggg gcgtgcgttt
    29821 gccattcctg actatacgtg gttccagttg ccggatggtg aggtttatgt gggcagctac
    29881 gcggattcgc gttttgctga ttctcctgtt gacgttccca atgaattttc taccgcaggc
    29941 ggggcaggga atacccagac attgccggtc attccggcta ttcgtccagg ggttattgtt
    30001 aacagccgac gcattaccaa agtggctatt gataatgatg aaatgtcgct gacgtggaca
    30061 ccactgaatg ccagcggcaa acccgcgcag aagccgcccg cgcaacgcca gatagaacag
    30121 cattacccag agctgagcgc cggattacac ctgccacgtc tggcgcgagt gatgagcact
    30181 aacgacagtg ccgcgctggg tgaccagtct gatccgtttc gtccccgcta tgcagtcaac
    30241 ctgcaactga tggatgagaa cggcaaccct gccgccgaca cacccgaata tcacgcggta
    30301 ccactgcccg ttccgatggc aggggctgaa gggggcatgt ttcagtatcc gcctgcggga
    30361 tcggttgttg aaattggctt cgcggaggga cggcccgata aaccggttat caggcagacc
    30421 atgcaggacg gcatggcatt gccagatatt aagccaggtg aacagctcca gcagcaacgc
    30481 gcaggcgtca gccagcgtgt cacaactgat ggcagttggc agcgtgaaac tgaccagact
    30541 attcaggaac gcagcagtca gcgccacgtt accagcgatg cagaaactcg cacgaccacg
    30601 acacggacaa ccacagtcaa cgggacagac accacaaccg tgctcggtac ccataaatta
    30661 ttggctggcg cggttgtggc attggcggac ggggattatg cgatcggaac gtcggcaaac
    30721 atgctgatac gtagcagcaa agaccggaat gactatgtcg gccagaacta ccattcagag
    30781 gttgcggggg cactaacaga gcgtatcgcg ggtatccgtc gcagtgtcgc cgcacaacaa
    30841 gaattgattg cgccatcaat caggctgggc aacgatcagt tgaatgtgct cacgctactg
    30901 acggacacac tggacgtgct gcacacgctg gcgcagcaga cggccaacca cacgcataac
    30961 aataccggca caccgcttaa cgccgaggcg atcaatggta ccggtcaacg tgctacggcg
    31021 ttaagcgaga aatacggccc cttcatcgcc tgataggctg cgcattttta cccttccacg
    31081 taaaaccgca tcaatcaaat tctaagcccc gcaggctgtc attaacgtga cggtctgtgt
    31141 cgtttcgtga tcgctcaacc atcgcccgcg ccggagttct cagcccgcat acggaagcgc
    31201 cagcgagacg taaagcgcgc tacaccgcac ccgcctgcac gatttggatc atgaaaattt
    31261 tgcaaaagaa atctggcgca aaccataccg ccagcccgcg cggtggctgg ggttctggtg
    31321 tctgggcgct tttgcacggt acgcaaggtt ttgcagcatt ttgcaaaatc aggcgcatga
    31381 cgcccgcgtg atgaattgag taatgcattg ttttaaaagg atcacttgcg gttttcgtca
    31441 ctttttttat gaacaaattt tgaggttgtt atttttgccg aaatgcgaga aatccagtgc
    31501 gggcgcggct tgcagggtga tagcgttgtc ggaagtgttt gcaaaatatt gcatgaaagg
    31561 atctacaaaa ggatcgttaa ggggccgtaa aaaaagctag cgggctgatg acggaaagca
    31621 gattcagggc gttctgtgat ggttcgcccg acacgtttaa atgccgagct tgcgacgtgg
    31681 gctgtacagt gtgtgatcta caacgatgaa tcctttttcc agccattgcg tcacctgggc
    31741 aggttgtacg ccagtgagtc gggcaaacga tgcctgattc ccgttgtagt attttttgat
    31801 gtagtcgagt agtggcatgg aagcatcctt ttatctatct caattgaaat atagtaaaat
    31861 actatatgat aatttaagtg taaagtgaga aggcaaaaga aaacccgcaa ttacgcgggc
    31921 ttattgtcga tgtggtcaat gtgtggacat tgaataaaat aaatcctttt atttcatgtt
    31981 gttatggtct atttcaggtc accgattact gacattgcga ggttttctcc aaatttgacc
    32041 ggacaatagc ggtctttatg agcgcagtca tgagaaagca ggtacctatc tggcaggaat
    32101 ttctgacaga agaacaccgt atgacagatg ctgcgtcgaa tctgttttgc aagccatcca
    32161 catgatgaag gcaatatagc gggctggcaa aacaggctga caatctgaac gacaagcgag
    32221 ggcgagaaaa aggccccact gacgtggagc ctttatttta cgctttttca gacagccatg
    32281 gaaattagat tgactgtgtg aaggtacggg taatgacgtc ttgctgctgt tctttagtca
    32341 gtgagttgaa acgcactgcg tagccagata cacggatagt caactgcgga tatttttccg
    32401 ggttttccat cgcatcaagc agcatttcac ggttcatgac gttgacgttc agatgttgac
    32461 cgccttcgat gctggcttcg tggtggaagt aaccatccat caggccagca aggttagctt
    32521 tacgcacgtt gtcgtcttta cctaacgcgt taggtacgat ggagaaggta taagaaatac
    32581 catctttcgc gtacgcaaac ggcagtttgg caacagaagt cagagaggca accgcacctt
    32641 tctgatcacg accgtgcatt gggttagcac ctggtccgaa cggtgcgcct gcgcggcggc
    32701 cgtctggcgt gttacctgtt ttcttaccat ataccacgtt agaggtgatg gtcagaacag
    32761 actgagttgg tgttgcgcca cggtaggtat tcagtttctg aattttcttc atgaaacgtt
    32821 caaccaggtc acaagccagt tcatctacgc gagagtcgtt gttaccgaat tgcggatatt
    32881 cgccttcgat atcaaagtcg atagccagac catcttcatc acgaattggt ttaactttgg
    32941 catatttgat ggcagacaag gagtcagcag caacagacag accagcgata ccacacgcca
    33001 tggtacggaa aacgtcacga tcgtgcagtg ccatcagcgc cgcttcgtag ctgtatttgt
    33061 catgcatgta gtgaatgatg ttcagagagg tgacgtactg cttagccagc caatccatga
    33121 agtgatccat acgttccatc acttcgtcga agttcagaac atcacctttg atcggttctg
    33181 atttcggacc aacctgcatt ttcagttttt cgtccacgcc gccattgatt gcgtacagca
    33241 tggtttttgc caggtttgca cgggcaccga agaactgcat ttgtttgcca acgatcatcg
    33301 ggcttacgca acaagcaatc gcgtagtcat cgttgttaaa gtcaggacgc atcagatcgt
    33361 cattctcgta ttgcagagaa gaggtatcga tggagacttt agcggcatag tttttaaagc
    33421 tttgtggcag tttctcagac cacagaatgg tcatgttcgg ctctggagaa ggccccattg
    33481 tgtacagggt gttcaggaag cggaagctgg ttttgctcac cagtgtacga ccatccagac
    33541 ccataccagc cagagattct gttgcccaga tcgggtcacc agagaacagc tcatcatact
    33601 caggtgtacg caggaaacgc accatacgca gtttcatgac cagatggtca atcatttcct
    33661 gagcttcttc ttccgtgatt tttcctgctt tcagatcgcg atcgaggtag atatccagga
    33721 aggtggagac acgtccgaag gacattgccg caccattctg tgatttaact gcagccagat
    33781 agccgaagta agtccactga acggcttcct gagctgtcgt tgctgggcta gaaatatcac
    33841 agccatattt agctgccatt tctttaattt ggctcagtgc atgatgctga tcggcaattt
    33901 cttcacgcag acggatcgtt gcttccaagt cttcgccatt ttccagtttg gattgcagag
    33961 aagtgaactg agcaaacttg tctttcatca agtagtcgat gccgtacagc gcaacgcgac
    34021 ggtagtcacc gatgatacgg ccacggccat aagcatccgg cagaccagtc agaacaccag
    34081 atttacggca acgcatgatg tctggggtgt aaacatcgaa cacgccctga ttgtgcgttt
    34141 tacggtattc agtgaagatt tttttcagtt gaggatcaag ttcacgaccg taaactttgc
    34201 atgaaccttc aaccattttg atgccgccga acggaattaa cgcacgtttc aacggagcgt
    34261 cagtctgaag accaacgatt ttttccaggc ctttgttgat gtatcccgcg tcgtgagacg
    34321 tgatagttgc agcaacattg gtatcaaaat caacaggcgc atgagtgcgg ttttcctgtt
    34381 tgatgccttc catgacgctg tcccacagcg ctgaggtcgc tttggttgcg ccagctagga
    34441 aagactcatc accttcatac ggcgtgtagt ttttctggat aaagtcacga acattgacgt
    34501 tatcctgcca ttcacctttg ctaaagcctt gccatgcatt ggccaatttt tcattcagct
    34561 cggtcat
//
