# Supplementary material for: May the Phage be With You? Prophage-Like Elements in the Genomes of Soft Rot Pectobacteriaceae: Pectobacterium spp. and Dickeya spp
Source: Front Microbiol. 2019 Feb 14;10:138. doi: 10.3389/fmicb.2019.00138 (PMC6385640; doi:10.3389/fmicb.2019.00138)
Supplement: Supplementary file 2 [file Data_Sheet_2.ZIP › Supplementary_prophagesGENBANK_files/Genbank FILES _SRP_prophages/phiPa3.gb]

LOCUS       Exported               32578 bp ds-DNA     linear   UNK 02-AUG-2018
DEFINITION  phiPa3.
ACCESSION   .
VERSION     .
KEYWORDS    .
SOURCE      phiPa3
  ORGANISM  phiPa3
REFERENCE   1  (bases 1 to 32578)
  AUTHORS   .
  TITLE     Direct Submission
  JOURNAL   Exported Aug 2, 2018 from SnapGene Viewer 4.2.3
            http://www.snapgene.com
FEATURES             Location/Qualifiers
     source          1..32578
                     /organism="prophage phiPa3"
                     /mol_type="genomic DNA"
                     /note="/genome_id=6666666.356862"
                     /note="/genome_md5="
                     /note="/project=robertczajkowski_6666666"
                     /db_xref="taxon:6666666"
     CDS             complement(194..1054)
                     /codon_start=1
                     /product="hypothetical protein"
                     /label=hypothetical protein
                     /db_xref="SEED:fig|6666666.356862.peg.1"
                     /translation="MNVDIIGDLDDSVRLQRYMNFAKFISLLDNREIFLCKTSLFEDEL
                     EGGFTVIDEMLSDGSAAILDNVVNNLLPTVNKQTLEEREERNKISADVMKHVEEEPYHT
                     VFGDIEKKDFSHQELHERIKDFIDVCCWHSNEKESMAMWKIYGEDDFAVCVITDVGNIK
                     RSIIKNKEYKILIAKVKYLIYEDEHFKQEHPLAQYMHKTDFYSYENEVRIIGYDPTSNI
                     YEERKASGTRIGVNLQELVQEIRVSSTAPDWFLGLVRSICKKFSLDVQVCRSGINIKHS
                     YYNKK"
     CDS             complement(1127..1369)
                     /codon_start=1
                     /product="hypothetical protein"
                     /label=hypothetical protein
                     /db_xref="SEED:fig|6666666.356862.peg.2"
                     /translation="MAIKCPKCRATAKTRTSVELSPLVRRSYHQCQNMMCGYCFTSMTH
                     IDEPLNETRPAPGARVPPNVFPRSHCGENQLDLGV"
     CDS             complement(1420..2553)
                     /codon_start=1
                     /product="Gene D protein"
                     /label=Gene D protein
                     /db_xref="SEED:fig|6666666.356862.peg.3"
                     /translation="MSIMDTVGVISGRLDEYSPRPAFMVRVGDKQVTELNDRLMSLSLT
                     DNRGFEADSLELVLDDADGKLALPERGAKVTVALGWANGPLISKGTFTVDEIAHRGPPD
                     QLTISARSADFRETFNVKREYSWHNVTVGFLVSAIASRYGLKAGVTERLAKLELDHADQ
                     TNESDISFLTRMAEMVGAIATIKNGMLLFIVPGQAVSQSGKPLPAITITRSSGDSHSFR
                     VADRDAYTGVTAYWLDLNFGKTKTTKVKNKRKTSTPTKKKAPASSSKEGNYLEGTEGNV
                     YVMRSTFKTEQAAKRAAAAKWSKLQRGAAEFSMTLARGRADLYPELHARMSGFKTVIDN
                     ADWIITRCVHDINQSGFTTSLEFEVKITNWAADDNDD"
     CDS             2710..3903
                     /codon_start=1
                     /product="Major tail sheath protein"
                     /label=Major tail sheath protein
                     /db_xref="SEED:fig|6666666.356862.peg.4"
                     /translation="MATNYHHGVTVRETTDLSTIINDIDSAVIGVVCTADDADADTFPL
                     NEPVLLTRVASVLGKAGKTGTLHTTLKCISDQASPQTVVIRVADAANAQAEGNEPKPTQ
                     DQLVIGGSDANGRYTGLYALLSAEARIGVRPRVLAVPELDTQAVAAQLAVMAEKLNAFA
                     YVSAHDCATIAAAKTYRENFSQRELMVIWPDFIAYDTAKGESVTVPAPAFAVGLRAKID
                     AETGWHKVLSNVAVNGVLGLSKDVYFTLQGTDTDADELNSNGITTLIKQNGFRFWGSRT
                     CDRETYLFESYTRTAQILADTIAEAHFFYIDKPLTPSLAKDIVDGINRKLTALVTAGRL
                     LGANCWYDKETNTGETLRTGKLTIKYNYTPVPPLEHLDLVQEFTDEYFATFANTFSG"
     CDS             3914..4429
                     /codon_start=1
                     /product="Major tail tube protein"
                     /label=Major tail tube protein
                     /db_xref="SEED:fig|6666666.356862.peg.5"
                     /translation="MSLPKKLKYFNLFIDGDNYFGQVPEVTPPKLTRKTEDYQAGGMPG
                     FVAIDFGFDAGALDMEITLGGLDANLLKKWGVATADGMQTRFAGSYQDETTGEAVPCEI
                     QTRGRFTDLDPGSAKVGEDTAHKYTLKNTYFKLTISGEEVMEVDVLNMIYKVAGVDMLE
                     KHRANVGL"
     CDS             4445..4756
                     /codon_start=1
                     /product="putative phage tail protein"
                     /label=putative phage tail protein
                     /db_xref="SEED:fig|6666666.356862.peg.6"
                     /translation="MTEKQNNIVILQNPITRKGGDVKKVTITGALKQAGSLRGLKVYDV
                     MTSDVDSLLTLLPRITSPALTKEELTTMDTWDFCQLSNAVATFLQPSSPANETDAVTA"
     CDS             4789..4905
                     /codon_start=1
                     /product="hypothetical protein"
                     /label=hypothetical protein
                     /db_xref="SEED:fig|6666666.356862.peg.7"
                     /translation="MADIAAIFHWLPSAMDAMPVDELLAWRSRAAVRSGNSE"
     CDS             4902..8003
                     /codon_start=1
                     /product="Phage protein"
                     /label=Phage protein
                     /db_xref="SEED:fig|6666666.356862.peg.8"
                     /translation="MTDRNLNIRVAFSAINNMARPVSAARSGTAALADQIRATQNTLNG
                     LGRQASSFDRLSAASAKTTRELEQAKAKAAAMRAEFGAASTRTDEQNAALKRQRELIRQ
                     LSTAQTNETEQLKQLRTELARHGVILDRSRRATDQISDQTARYNRQLAEQQRRLAAVTQ
                     ARTRYDRMQQTASNLRSTGTMAIGASAAGAYVGARMMAPSLQSDKSGAVIAAQNAEASS
                     MGTQYSRMIKGINSDGVSDDLAHIANTLSAVRSSLGALGEVGSAELDRITRKALDMQSV
                     LGGDTAEHIQIAAIMMKNGLAASSDEAFDLMAAGMQRVSSQMRGELPEILHEYSTHFRN
                     MGYSGSEAMTLLVNMAQQGKFALDKTGDAVKEFSIRGSDLSKASVAAYDTIGLNAKRVA
                     SAIASGGAQARNAMQKTAQGLLKIKDPAERANAAIALFGTPIEDLSIDQIPNFLSALAN
                     TTDQFSNVSGTADRMGSTLRDNLSGDIDKLGGALSGLRFAIFENDSGVLRKLAQGATAL
                     VNSVREWVTANPELAQTLLVVVGGALALTAAIGTVSLATGILMGPFSKLQLGLSLLSGG
                     KGIGTVTSMFSRLSGVMTGSLSSTRAWGGILTSIRSGIGGIGGIAQSAGRSLLMAFTQP
                     GAALSALGNGVRMLATSGFSALSGSGMAVFNILRTGLMLLLSPIGLIGVAIIAAGVLIY
                     KYWEPIKAFFSGYFSGLVAGLEPVKQSFSALSPIFDGIGRAISGVWDWFTKLFEPVNAS
                     SESLKQCTDAGRVFGEVVGVAIGGVVTVILKVAEGIGWILEKLGVIPEAANAAVSASNA
                     MNGAIPQKGDEPKKPVMYVWDKKQKKMVAQEWKPQPPKEADAVIKTGEAAKQPAGESNT
                     PKPKGALQDLTGSNPTTAKTGSKATTEEKKDPNKLGDIVFKNVPPAVMLANGYRESQVM
                     PAQPKIPLLERVKQTAGLLAASVLPFTVQPVGADVPAINSPAAQMRTAMSAGMANTDKY
                     EINITIQDARSLDEDKLVARLRREIDDIERRKQSRQRSQLTDHV"
     CDS             8014..8436
                     /codon_start=1
                     /product="Phage-related tail protein"
                     /label=Phage-related tail protein
                     /db_xref="SEED:fig|6666666.356862.peg.9"
                     /translation="MMMILGMFVFMRQTTPYQSLSHDSTWRHVKNDRVGKSPHYQYIGA
                     GEDKITLSGELYPEITGGDVSLNVLQTMAYTGKAWPLIEGTGNIYGMYVITNINETRSE
                     FFTDGKARHISFTLNLERVSEDLREMLGDMDIGLSL"
     CDS             complement(8592..9233)
                     /codon_start=1
                     /product="Tail fiber assembly protein"
                     /label=Tail fiber assembly protein
                     /db_xref="SEED:fig|6666666.356862.peg.10"
                     /translation="MSNYSTQIKNAELNERGLAINTGWITVYHVNPATREYQSASYEYV
                     MQGVGLPADSYADEPALPPVGQALRRSVDGKTWEVVQDYRGQTVYSTETRQAQTVAQFG
                     DLPEGVTLLKPVTEFDMWNGKKWVIDKAAKAAAALKTAQQELAARKAAATARINELTYA
                     VNLDIATDDEKAALAEWQKYAVLLSRVDVSATAIEWPMVPDEELIVTADQ"
     CDS             complement(9233..11128)
                     /codon_start=1
                     /product="Tail fiber protein"
                     /label=Tail fiber protein
                     /db_xref="SEED:fig|6666666.356862.peg.11"
                     /translation="MSAKYLVLLTNIGAAKLANATALGSRLNITQMAVGDGGGILPTPS
                     PAQLTLINEKRRAAINTLSTDPQNPSQIIAEQVIPENEGGWWIREIGLFDDDGNLIAIA
                     NCPETYKPQLQEGSGRIQTVRMILIVSSTDAVTLKIDPSVVLATRSYVDNAIDTHERGR
                     KHPDATLNAKGFVQLSNATNSDSEALAATPRAVKAAVTTANNAATAADNANTNANGRVP
                     SGRTVNGKALTADIALNAVDIGAYTKAETDNQVGTALTAANNANTNANGRVPSGRTVNG
                     KALTADIALNAVDIGAYTKAETDTQVGKVLTAANNANTNANSRVPSGRTVNGKALTADI
                     ALSAAEVGALAKDQNGADIPNKPLFLSNINAVSTDTFQVITGKKLLSADDDALTIKPKA
                     QGQRAYIQFNNAASDTAIAFVGLRYGADEQGLTLEHRSGASIRIADGAINFYGLPHGAT
                     APTGTNTTQLASTEFVQNELAATAGMPRPWPRATAPTGWLKCNGQSFDISAFPRLAAAY
                     PAGVLPDLRGEFMRGWDDGRGVDSGRALLSAQSDAIRNIVGEIWTSAASQQFLGETLSS
                     SGVFELLYEFAVGAIPDAAGNSCPTRMKFDAGRTVPTANENRPRNIAFNYIVRAA"
     CDS             complement(11125..11733)
                     /codon_start=1
                     /product="Tail protein I"
                     /label=Tail protein I
                     /db_xref="SEED:fig|6666666.356862.peg.12"
                     /translation="MNNSLLPVGSSELEIAAAKACAELSRTPIPLRQLCNPDSCPANLL
                     PYLAWAFSVDRWDEKWPEIIKRQAIKDAYFIHRHKGTIGALRRVVEPFGYLIRIIEWWQ
                     YGGEPGTFRLDIGVQDSGITEEVFNELERLIADAKPASRHLLGLNINLDTQGAAYVAAT
                     SYSGDTLTVYPYFPETITVSGLEVTVAALHLIDNVSVNA"
     CDS             complement(11726..12637)
                     /codon_start=1
                     /product="Phage baseplate assembly protein J"
                     /label=Phage baseplate assembly protein J
                     /db_xref="SEED:fig|6666666.356862.peg.13"
                     /translation="MSGLIDLSLLPAPDVVEALDYETLYAERKAMFIALFPLEKRDAIT
                     RTLALESDPITKLLQLSVYHELLLRQRVNEAASANMLAYAAESDLEQLAANFNVQRLVI
                     TATDTEAIPLIDAVMESDADLRTRAQQAFEGLSVAGPTAAYEFHARSADGRVADASAVS
                     PSPATVTVTVLSRDGNGSASNALLQVVNAALNAENVRPVADRVTVQSAVIIPYDITATL
                     YFYPGPEAEPIRITAEARLQAYITAQHRLGRDIRRSAIFAALHVEGVQRVDLGSPAEDI
                     VLDKSQASYCANWTLNSGGSDE"
     CDS             complement(12637..12993)
                     /codon_start=1
                     /product="Phage baseplate assembly protein"
                     /label=Phage baseplate assembly protein
                     /db_xref="SEED:fig|6666666.356862.peg.14"
                     /translation="MSNEKYIGMNASTGRAIADDEHISQSVRDILITPVGSRVMRRSYG
                     SQLFSLIDEPQELAIKLKITSAIYSALMRWEPRITPTKITLETRGAGLVAVTLQAKRTD
                     NMAAFSATVSLQGA"
     CDS             complement(12990..13574)
                     /codon_start=1
                     /product="Phage baseplate assembly protein V"
                     /label=Phage baseplate assembly protein V
                     /db_xref="SEED:fig|6666666.356862.peg.15"
                     /translation="MTTNEFDRLLHNLIRIGTVIDVDHARHLARVETGGNTTDWIRWGV
                     ARAGDAKTWWPLSVGEQVVMVAPGGDLEIAVIVFSLYSNQHSAPSNTPKVHTTVYPDGA
                     SETYDANTSTMTVKGVKNVIVEAAESITLDTPKVICTQHLSTQTLSVEKGGTMRGDITH
                     TGGQISSNGVVVDSHTHGGVQRGGSKTDGPQ"
     CDS             complement(13665..14306)
                     /codon_start=1
                     /product="Phage tail completion protein"
                     /label=Phage tail completion protein
                     /db_xref="SEED:fig|6666666.356862.peg.16"
                     /translation="MMSQNDALFQELDGYLQSVVEHLAANQRRRLSRQIATGLRKRQQQ
                     RIAQQKNPDSSSYEGRKKQTRRTQGGVRFMWKGEARELRNWHSSKGRSGERMITGFDVG
                     RGGLRSFLRADIDRYLSINVSSVSAAPARKEKMFRKLRTVRFLRIETSPNSAAVGFSGQ
                     AGIIARIHQFGEADKIGRSSVRYPIRELLGLTPPDLDWVADIITNFIQPD"
     CDS             complement(14303..14794)
                     /codon_start=1
                     /product="Phage tail protein # FIG072132 and FIG003673"
                     /label=Phage tail protein # FIG072132 and FIG003673
                     /db_xref="SEED:fig|6666666.356862.peg.17"
                     /translation="MLKAELLRKAISEQVPWLRENPDQLVVYVQKGNAISTGARSASFE
                     YRYTLEVLAMDYPHSIDTLMVPILMWARIYQPDLLLNPERRKTGITFEADLLSNSTADL
                     LIRIQADEAVIVTRNDAGEINIRHRADPPSDPMEGMDGWSLLTNGDVANMVVHDSTAGQ
                     "
     CDS             complement(14911..15336)
                     /codon_start=1
                     /product="hypothetical protein"
                     /label=hypothetical protein
                     /db_xref="SEED:fig|6666666.356862.peg.18"
                     /translation="MSGKVIATLAAALLFITAIALADHYRQESQRLSGEVATLINERDS
                     TSRIISNQQRTFQIFNTLSREAEHDKRRIQQDADTRSQTINQALAGQVCSDEFVPDGAA
                     VPLLDYANRLRADSVRSPASEPNRTDSNTAAAGRDSQ"
     CDS             complement(15318..15794)
                     /codon_start=1
                     /product="Lysozyme (EC 3.2.1.17)"
                     /EC_number="3.2.1.17"
                     /label=Lysozyme
                     /db_xref="SEED:fig|6666666.356862.peg.19"
                     /translation="MLPEALKQKIIPVVTACALVIATVFVGFFEGKENAAYRDIAGVWT
                     ICYGHTGDVKAGDYKTSAECEALLQQDLKPAFHAIDRLVTVPLSELQRAALASFIYNVG
                     AGAFERSTLLKKLNRGDLTGACNELRRWNKAVGQVWQGLTNRREAERVLCLEKL"
     CDS             complement(15784..16086)
                     /codon_start=1
                     /product="hypothetical protein"
                     /label=hypothetical protein
                     /db_xref="SEED:fig|6666666.356862.peg.20"
                     /translation="MGLTTDRVASAITYLLATLIATAGRMTLSDWATLIGIAIGLLTFW
                     VNRNHKKNIERDQVQRTDLMRELVRKVDHENLPETLDALRVMNGQDTGRRGRDVT"
     CDS             complement(16077..16280)
                     /codon_start=1
                     /product="Phage tail X"
                     /label=Phage tail X
                     /db_xref="SEED:fig|6666666.356862.peg.21"
                     /translation="MEVRAQQNDTVDLLCWRYYGRTDGVTEGVYAANPGLCERGPLLPA
                     GLLVTLPDVTAATQQEIIQLWD"
     CDS             complement(16280..16786)
                     /codon_start=1
                     /product="Phage head completion-stabilization protein"
                     /label=Phage head completion-stabilization protein
                     /db_xref="SEED:fig|6666666.356862.peg.22"
                     /translation="MSLIATEPVRPATQDTINDGDAKVTSQAFWPVIVLSALRRAMRLD
                     GQVTTDRLMDKAIEAVAHVNGQLSDWRGSQEQRGFASLSDVKSEGADEIDQINGESVLV
                     WRYRRAVYSITKALLIEGYRDIDTTREGEKHAEALSSQIDTLWRDGRWAIRDILGVNRG
                     MAELV"
     CDS             complement(16883..17698)
                     /codon_start=1
                     /product="Phage terminase, endonuclease subunit"
                     /label=Phage terminase, endonuclease subunit
                     /db_xref="SEED:fig|6666666.356862.peg.23"
                     /translation="MLTPAQRHFQTVMAQRHGKSNGGDVEHTAYEQQLHRLRMDKSRLS
                     QVQSAATKAELKRELLPDYQGWVNGVLAADSGQADEVLTTIMIWSIDAGLTSDALRIAD
                     YVLRHRLPMPDQYKRTVATTLVDEICDPALAVFKADTSRAPLPAALLLQLEQLTAGEDM
                     PDQVRAKLYKTLGYTLRLDANELSAARDWLQRAVTLFDGIGVKRDIELLGRALKKATEA
                     ETENTDAPPTPPADNPADNPVAKAARAPRKSTAAKASRTTTPRARKSAS"
     CDS             complement(17749..18807)
                     /codon_start=1
                     /product="Phage major capsid protein #Fam0066"
                     /label=Phage major capsid protein #Fam0066
                     /db_xref="SEED:fig|6666666.356862.peg.24"
                     /translation="MKNETRVLYDAYINRQADLNSVQPAHVTQQFSISPSVQQKLEDKV
                     QQSSELLQKINITGVSDQEGQKLGLGISGPVSSSNTSTTDRREPKSVHTMDDDKYRCEQ
                     TNTDTFISYPQLDMWAKFPDFQQRISNQIIKRKALDRIMIGFNGTSRADKSNLATNPLL
                     QDVNIGWLEKYRRHAAQRVMKNIKVTSRDDENKVIAKGDYGNLDAVVYDAINSLLDEWF
                     KTSQDLVVICGRQILVSKEFPLINAINTNNPNSEALAGQLLVSRKAIGNLPTFIAPFFP
                     DGSMLITPFSNLSIYWQEDKQRRAVRDEPERNRIATYESSNDAYVIEDYGTGCLIEGIT
                     FAEAAPVAPVEG"
     CDS             complement(18842..19687)
                     /codon_start=1
                     /product="Phage capsid scaffolding protein # Fam Scf032"
                     /label=Phage capsid scaffolding protein # Fam Scf032
                     /db_xref="SEED:fig|6666666.356862.peg.25"
                     /translation="MPISKPFLAAVEGATCDGRMLERVHISQMAKNFNKQVRGARVNLE
                     HIRGYSPTSDFRAYGDVEEVSEFEIQDGPLKGKLALQIKIDATDDMVALNTKRQKIYPS
                     IEIHPSFADTGEAYLMGLGMTDDPASLGVGILEFNAKCGGKGPLDGRKTSPECFFTAAD
                     TPITLEFEDGAPTGDAGRNFFSRITELLTGSQQRFNKENGELKQAVELIAQSQRDLLDK
                     TEAFSALQTQNTELKGNVSTLTQSLTELKAQLAGQDGNFSQRPPASGGNQQSNVVLADC
                     "
     CDS             19834..21546
                     /codon_start=1
                     /product="Phage terminase, ATPase subunit"
                     /label=Phage terminase, ATPase subunit
                     /db_xref="SEED:fig|6666666.356862.peg.26"
                     /translation="MNLLSDIRNEAKSLYWQAYSIPQIAQRLGVSNNTLYSWRRRDKWD
                     DSTPIQRAQERTEVRYLRLIEKDDLTPHDFKTIDLLGRQMARFSRDERKDQEKETRKKA
                     PKNHFTDEQIAQLRALVLGSLYEHQKRWYKKRKQRNRAILKSRQIGASWYFAREALLDA
                     LETGTNQIFLSASRAQAYQFKRFIQLLASSIGVELKGGDAIVLSNGATLYFLGTSAATA
                     QSYTGNLYFDEFFWVSNFLNLRKVAAGMATQKGLRRTYFSTPSSEEHEAYTFWTGDFFN
                     KSRPKAERVEIDVTHKVLKKGLLCGDNIWRQIVTIHDTLEQGFDLVDLDEIKSENSPDD
                     FENLYACRFVSVGERAFDYTALINCGVDGYNDDVWPDWRPYTQRPLGNRPVWIGYDPSG
                     DSGTGDSAGLSIVSPPAVPGGKFRVIEVRQLRGMTFEKQAEVIKELTHQYNVQFIGIDS
                     TGNGSAVHQLVVKFFPAAVKYQYSPSVKRELVLKAQMLIRAGRFEYDAGMMELARSFMT
                     VRKFVTQGGMTSYASDRTKGSSHGDIAWATMHALHNEPIGSESGGNDGFIQEF"
     CDS             21549..22616
                     /codon_start=1
                     /product="Presumed portal vertex protein"
                     /label=Presumed portal vertex protein
                     /db_xref="SEED:fig|6666666.356862.peg.27"
                     /translation="MSRKKHYSHTASQRSPAAQTPVTGELIQQPIESLQSFSFGDAQPI
                     MDRRDLLDCMECARNGRWYEPPISTYGLARMFDVAVHHQSPILFKRNVIMSCYEPHPLL
                     SRQDASAFVLDWLVFGNAYLELRKNRIGQPLKLKHTHAKYTRRGENLDQYWFVTYYAND
                     HEFEPGSVFHVKSPSIHQEIYGTPEYMAVIQSAMLNGEATLFRRNYYINGSHAGVIVYL
                     TDPITNNADVEQLKKSLKDARGGGAFKNLFVYAAGGKKDGLQILPFSQIAAKDEFTGIK
                     DATRDDMLAAHRVPPNLMGIMPNNAGGFGDVEKAAKVFAINELMPIMESLKELNDWLGI
                     EVLRFKPYALADSAM"
     CDS             complement(23078..23872)
                     /codon_start=1
                     /product="hypothetical protein; Hypothetical transmembrane 
                     protein"
                     /label=hypothetical protein
                     /db_xref="SEED:fig|6666666.356862.peg.28"
                     /translation="MNTLVLALALISGYLYVVSSVSARYIFKRSEGWSAYFYVAAWGVV
                     FTVCAWIFCSALSVLGAFRWLYNLLLFNEFFDKDSLNKVFPLSPATEFKFTDFKFALFC
                     ISSMLLAFGSGRMMRWYTCKNANRRIEALIKAVHSDPYESMLIEAAVRKFPVIITLSTR
                     KFYVGIVSCPEFEHGRAEYLQLLPLLSGYRDKDDLTITVTTNYRRHYIDNGIGGGFDDG
                     RLSLDDFRVLVPKDTIEGISFFDTATYVKLKEKEQSDKAQSA"
     CDS             complement(24372..26876)
                     /codon_start=1
                     /product="Phage replication protein # Replication gene A 
                     protein"
                     /label=Phage replication protein # Replication gene A
                     /db_xref="SEED:fig|6666666.356862.peg.29"
                     /translation="MSEQWAYPWNAPRPAISPYQGIAESFTSSVVNTPEPHPAVEQHLK
                     RLVSRAAFSDLDFEQAVARLDYFEPNSTLLTMRRQFAEAVRDEHQAALQNWMETPEGVE
                     ARLLEQPFFIRDTYRKKIEWLRANREPRHVSAFFMGTVKKALLRLDAVRAKQGVRDGFT
                     SELASYWRARWQHLAEFTKHEAINAGHAIAASITEMFETECGNTLPADMTNDEIQALFW
                     HLGYEMLALRVTPPCWGVIICDNESKKRICSAILRIISPDWWGRKLWRLRCEWRENQFR
                     AIGVIHKKRMPYVSIDALNQWQEQRRKNREFFKAHELVDEDGNVASLENMVYASVSNPV
                     IRRHELMTRMAGVEMVAISRSDEGVFLTITCPSRYHATIQSGHQNPKWDTSSPRQGQRY
                     LCKTWAKAMSKLNRRGLRPYGFRVAEPHHDATPHWHVLLFMPPEDRKEITEILREYFIA
                     VDRAELGRNTGARFKAKRLDPKKGSATAYVAKYISKNIDGYALDGERDNETGKPLRETA
                     RFAMAWASQHNIRQFQPFGLPPVTVWRELRKLANQLTAVQKEAGTFRRGAAQLGDPAMD
                     AVLASADAGCFATYIEKQGGVLIPRELYTVRIAYEDADEQNDYGETPEKIFGVFSPRLG
                     ELSRICTRLVKWKIRKKQVADAGTNDSAGRGLVVTSPTGDAWSSVNNSTGDEKISISEP
                     ADREIGSASEPEITDFEHITDTERRGLLNRLRSKPPDRRHKEHSSTTQTIKATEKQTVS
                     KRSDDWRASIADFACSLGWDISAGELRRLETGNAITLAGYAYVASADGCLCRTPTSKQK
                     DVEYQDKAADLLQRIAVLREAS"
     CDS             complement(26876..27880)
                     /codon_start=1
                     /product="Phage-related protein"
                     /label=Phage-related protein
                     /db_xref="SEED:fig|6666666.356862.peg.30"
                     /translation="MIDPRCFYDDTINVISVSGGKDSLAQWLLAVENGVSHIPAFADTG
                     HEHPQTMEYLDYLESKLGKIRRVHADFSRQIAGKRKFIAEKWPITLVSECGFTDEQAAN
                     IIATALDTLHPTGIPFLDLCMWKGRFPSTKRRFCSTELKHEPIRLQVVEPIIDAGFEVV
                     SWQGVRAEESASRALLSEWENGFDLGPRLSIYRPILHWKHADVFALARRYGVKPNPLYE
                     QGCSRVGCMPCIHARKSELAEIFRRWPEEVERVARWERLVAACSRRQNSTFFPSTNDPK
                     KSERRIECISVESHGIHTYRDWALTTRGGRQFDLLGEVVDPMVCNSVYAGVCE"
     CDS             complement(27892..28794)
                     /codon_start=1
                     /product="Methyl-directed repair DNA adenine methylase (EC 
                     2.1.1.72)"
                     /EC_number="2.1.1.72"
                     /label=Methyl-directed repair DNA adenine methylase
                     /db_xref="SEED:fig|6666666.356862.peg.31"
                     /db_xref="GO:0009007"
                     /translation="MIRPFIKWAGGKTRVLPDLLPLLPKGDCLIEPFVGGASVFLNTDY
                     PSYVLADINPDLINLYQCAAYDTERLIATARELFNSGNNADAYNGNRLSFNYQKSNPST
                     VTAALFLYLNRHGFNGLCRYNNAGDFNIPFGKYRKPYFPEHEIRLFAEKANDTKTVFSV
                     ADFRKTLTIKGINKSTVIYCDPPYLPASDTANFTQYHHASFTHDHHRDLAAVLLSVNLS
                     RGVPVVISNSDTPATREIYQHYQFHEIAVQRSISASGITRGAAKEVIGVLKTCDGCGDE
                     SDSDVLPGYWESEENPIPL"
     CDS             complement(28791..29024)
                     /codon_start=1
                     /product="hypothetical protein"
                     /label=hypothetical protein
                     /db_xref="SEED:fig|6666666.356862.peg.32"
                     /translation="MRNAEVREIKVDLNEALIELLKKARLEEKKDQHWSFAQRLAALAI
                     HAQQKELSAAEVIELLHKEAERFEHSSQEIIV"
     CDS             complement(29095..29430)
                     /codon_start=1
                     /product="Phage protein"
                     /label=Phage protein
                     /db_xref="SEED:fig|6666666.356862.peg.33"
                     /translation="MANTEAVRAVPLSIAARTDGLNHIAMLRGKHFNTNSEKDMCRFID
                     DMRDKIDGDYHQNMRVLSAIFELADIDKERRNLKFNELITEEKAKLIKAMNKLKAVVSL
                     FPKHLIL"
     CDS             complement(29436..29636)
                     /codon_start=1
                     /product="hypothetical protein"
                     /label=hypothetical protein
                     /db_xref="SEED:fig|6666666.356862.peg.34"
                     /translation="MISTARLLKEKSPSPQENKGWLELPNGQRFQPTPAQAYFAPWSKK
                     PYMPAPKQKRRWFARLMGIAA"
     CDS             complement(29639..29869)
                     /codon_start=1
                     /product="hypothetical protein"
                     /label=hypothetical protein
                     /db_xref="SEED:fig|6666666.356862.peg.35"
                     /translation="MGEDNKGLVFLGIDNALIKLSEHTSIYRGFSIIRCPRTATNPITR
                     YRISQGDQSFGLFDALGQATSYINELHGMRD"
     CDS             complement(29871..30143)
                     /codon_start=1
                     /product="Cox"
                     /label=Cox
                     /db_xref="SEED:fig|6666666.356862.peg.36"
                     /translation="MADGVYEVRYPVDAVPYQKFAELIGKSDAAVKGMIDAGKLPLVPW
                     VNPENPNPRRAENWVFIPEFNRAMRDAYMNRPKEQRDAWLLWLGL"
     CDS             30263..30376
                     /codon_start=1
                     /product="hypothetical protein"
                     /label=hypothetical protein
                     /db_xref="SEED:fig|6666666.356862.peg.37"
                     /translation="MIPNKINIRSLVTPDKDTDDFHVLHKPAPPEEKDDEE"
     CDS             30382..30849
                     /codon_start=1
                     /product="hypothetical protein"
                     /label=hypothetical protein
                     /db_xref="SEED:fig|6666666.356862.peg.38"
                     /translation="MNKQPTEYEINFRIWYSYWLERMTETLNRRIDVSINAITLTLGSA
                     IFATSHFSWLFGGIIAVLSGFRIAWQYGQKAESAKQQVKRYSALIDDLPAITIDEARAR
                     LAMLEEFDSAALNSLCNPARNGASISLKLKHRETLSFAEKAISLLAGSTPR"
     CDS             31107..31400
                     /codon_start=1
                     /product="C protein"
                     /label=C protein
                     /db_xref="SEED:fig|6666666.356862.peg.39"
                     /translation="MTFDEKLKAIRSAEHLSQSQFAVITEISVSTLKKVEAGYHDPGWT
                     ILSKITQHPRFQKYTLWLMTDKTAPEAGQIAPALAHIGPDSTQSGHSEKQTG"
     CDS             31470..32453
                     /codon_start=1
                     /product="Phage integrase"
                     /label=Phage integrase
                     /db_xref="SEED:fig|6666666.356862.peg.40"
                     /translation="MAIKKLDDGRFEVDIRPIGRNGKRIRRRFDKKTEAVAFERYTLSR
                     TDKKEWQHGYGVEHRQLSELVALWWLYHGQNVKNGLIEHRHLKRTIAQMNDPEICRINK
                     RSILEFRTMRLTGGISSSTINRDMYRLSGMFSALIKLEIYAGENPLKGLPPLPEKQPAV
                     TFLTEAEIARLLSVLDGDAYRLAVLCLSTGARWGEASTLRAEQVVSSRVTFMETKNGKN
                     RTIPISEEVSQIIKTRETGKLFKVDYPAFCEQIRAVKPDIPKGQASHILRHTFASHFVM
                     NGGNLVALQQILGHASIQQTMTYAHLAPEYLQNAITLNPLRGKSGI"
ORIGIN
        1 aaaaaaaagc cctccatcat ggagggcgaa aagacaggga tggtgtagac atcatttccg
       61 taacacatag aaataaaagg atttatttct cacaatgtcc acacattgac cacatcgaaa
      121 caaaaacccc gcgtttggtt gcggggtttt tcataagcta gtgacagggt agacttacat
      181 gcgtctgtat atattatttt ttattataat aggagtgttt tatatttatt cctgatctgc
      241 aaacttgcac atctaaggaa aattttttgc atattgaacg gacaaggccg agaaaccagt
      301 caggagccgt cgacgatact ctgatctctt gtactaattc ttgaagattg acgccaatac
      361 gtgtgcctga cgcctttcgt tcttcataaa tatttgatgt tgggtcatac cctatgattc
      421 ttacttcatt ctcataagag taaaaatctg ttttatgcat atattgagca agcggatgtt
      481 cttgtttaaa gtgttcatct tcataaataa gatatttcac cttagcaatt aaaattttat
      541 actctttatt tttaattata cttcttttta tattcccaac atcagtaatg acgcaaacag
      601 caaaatcatc ctctccataa attttccaca ttgccatgct ttctttttca ttactatgcc
      661 aacagcatac atcaataaaa tctttaattc tttcatgaag ttcttgatga ctaaaatcct
      721 ttttttcaat atctccgaaa acagtatgat acggctcttc ttcaacatgc ttcattacat
      781 cagcactgat tttatttctt tcttctcttt cttcaagcgt ttgcttatta acagtaggca
      841 atagattgtt aacaacattg tcaagtatag cggcagatcc atcactcaac atttcatcaa
      901 taacagtaaa tccaccttcc agctcatcct cgaataaaga tgttttacat aaaaaaatct
      961 ctcgattatc aagcagcgaa ataaatttcg caaagttcat atatctttgt aatcttaccg
     1021 aatcatctaa atcaccaata atatcaacat tcatgttttt ataccttttt tgatataact
     1081 aaaagctcgc gatatatcac tatcgcgagc ttttctttca tctgatttaa acccccagat
     1141 ccagctgatt ctccccgcag tggctgcggg gaaacacgtt gggcgggacg cgggcgcctg
     1201 gtgcagggcg ggtttcgttt agtggttcgt cgatgtgcgt catgctggtg aagcagtaac
     1261 cgcacatcat gttttggcac tggtgatagc tacgtcgaac caatgggctg agttctacgc
     1321 tggtacgtgt ttttgcagtt gcgcggcact ttggacattt gatcgccatg acaacccctc
     1381 aaactgttgg tgttactggt attatacaca gacgttgcat taatcatcat tatcgtctgc
     1441 tgcccagttc gttattttca cttcaaattc cagcgaggta gtaaatcccg attggttgat
     1501 atcatgtaca cagcgcgtaa ttatccagtc ggcattatcg ataaccgttt taaacccaga
     1561 catacgggcg tgtaattcgg gatataaatc ggcacgacct cgcgctaacg tcatactgaa
     1621 ttctgctgcc ccgcgttgta acttcgacca tttagccgcg gcggcgcgtt ttgcagcttg
     1681 ctcggtttta aatgtcgagc gcatgacata aacattacct tccgtaccct ccagataatt
     1741 cccctcttta ctgctggatg caggtgcttt ctttttagtg ggcgtactgg ttttacgttt
     1801 attttttacc tttgtggtct tggttttacc aaaattcaga tccagccagt acgctgtaac
     1861 accggtatag gcgtcacgat cagcaacacg gaaactgtgg ctgtctccgc tgctgcgggt
     1921 aatggtgatg gccggtaacg gcttgccact ttgtgatacc gcctgccctg gaacaatgaa
     1981 cagcaacata ccgtttttta tcgtggcgat tgccccaacc atttctgcca tgcgagtaag
     2041 gaagctgata tctgattcat tggtctgatc agcatggtca agttccagct tagccagccg
     2101 ttctgtcacg cctgctttca acccgtagcg gctagcgatg gcagatacca aaaatccgac
     2161 ggtaacattg tgccaactgt attcacgctt aacgttgaat gtctctctga aatcggcact
     2221 gcgggcgcta attgttagct gatccggcgg gccacgatgc gcaatttcat caaccgtaaa
     2281 tgtccccttg ctgattagcg gcccattagc ccagcctagc gccactgtga cctttgcgcc
     2341 acgctccggc agggctaatt ttccgtctgc atcatccagc accaattcca gtgaatccgc
     2401 ttcaaagcct cggttatctg tcagcgataa cgacatcagc cgatcattca gctccgtaac
     2461 ctgcttatcg ccgaccctca ccataaacgc cggacggggt gaatactcgt ccaaccgccc
     2521 agaaataacc cctaccgtgt ccatgattga cattgttacc ccctgatctc tgactgaata
     2581 ctcgcgttac gcgcgcgtag gaacaatcag cgctcgttgt cacgtttcta agacacagca
     2641 aacgccgtgc gcagcccacg aaatcccgca atcatgaagc cggacatttg acgcattgag
     2701 gcaacaaaca tggcgactaa ttatcatcac ggtgtgaccg tccgagaaac cacggatctc
     2761 agcaccatca ttaacgatat cgactcggca gtgatcggcg tggtgtgcac tgccgatgat
     2821 gccgacgctg atacgttccc gttaaacgaa cccgtattgt taacccgcgt tgccagcgtg
     2881 ttaggcaagg caggaaaaac cggtacgtta cacacgacgc tgaaatgcat ttccgatcaa
     2941 gccagtcctc aaacggtggt gatccgcgtg gcagatgcgg cgaatgcgca ggcggaaggc
     3001 aatgaaccta aaccgacgca agatcagtta gtgatcggcg gttccgatgc caacgggcgc
     3061 tatacggggc tgtatgcgct gctgtcggca gaggcacgaa ttggtgttcg cccgcgcgta
     3121 ctggctgtac cggaactgga tacccaagcc gttgccgcgc aactggccgt catggctgaa
     3181 aagctaaacg cgttcgctta tgtcagcgcg catgactgcg cgaccatcgc ggcggcaaaa
     3241 acgtaccgtg aaaacttctc ccagcgcgaa cttatggtga tctggcctga ttttatcgcc
     3301 tatgacacgg ccaaagggga aagcgttacc gtacccgcgc cagcgtttgc ggttggtcta
     3361 cgtgccaaaa ttgatgcgga aaccggctgg cacaaggtgt tatccaacgt tgcggtaaac
     3421 ggcgtgctag gtctgagcaa ggatgtgtat ttcacgctac agggaaccga taccgacgcc
     3481 gacgagctga acagcaacgg tatcactacg ctgattaagc aaaacggctt tcgcttttgg
     3541 ggatcgcgca cttgtgatcg tgaaacctac ctttttgaaa gctacacccg tacggcgcaa
     3601 atcctcgcag acaccatcgc agaagcgcat ttcttctaca tcgataagcc gcttacgccc
     3661 tcactggcaa aggatattgt ggacggcatc aaccgcaagt taacggcgct ggtcaccgct
     3721 ggccgtctgc tgggtgcgaa ttgttggtat gacaaagaaa ccaacaccgg cgaaacgcta
     3781 cgcactggaa aattaaccat caagtacaac tacacacccg ttccgccatt agagcatttg
     3841 gatctggtgc aggagtttac tgacgaatac ttcgcgacgt ttgccaacac gttcagcggg
     3901 taaggggtaa atcatgtctc tgccaaaaaa acttaaatac ttcaatctgt ttatcgacgg
     3961 tgacaactat ttcggccagg tgccggaagt gacaccgccc aaactcacgc gcaagacaga
     4021 agactatcag gcgggcggca tgcctggctt tgtcgcgatt gacttcggtt ttgatgcggg
     4081 cgcgctggat atggaaatca cgctcggcgg gctggatgcc aacttgctga aaaaatgggg
     4141 tgtcgccaca gctgacggta tgcaaacgcg ctttgcaggt tcgtatcagg atgaaaccac
     4201 aggcgaagcc gtgccgtgtg aaatccagac gcgcggccgg tttaccgatc ttgacccagg
     4261 ctctgccaaa gtgggtgaag atacggcaca taaatacacg ctgaaaaata cctacttcaa
     4321 gctgacgatc agcggtgaag aggtcatgga agtggatgtg ctgaacatga tttataaagt
     4381 ggccggtgtc gatatgctgg aaaaacaccg cgctaacgtt gggctataac aggaaatttt
     4441 tatcatgacc gagaaacaaa ataacatcgt cattctgcaa aacccgatta cgcgtaaagg
     4501 cggtgacgtg aaaaaagtca cgatcaccgg tgcactgaaa caggccggat cgctgcgtgg
     4561 gttgaaagtc tacgatgtga tgacgtccga tgttgacagc ctgctgacgt tgctcccgcg
     4621 catcaccagt ccggcgctga cgaaagaaga actgaccacg atggacacct gggacttttg
     4681 ccagctatcc aacgcggtgg ccactttttt gcaaccctct tccccagcga acgagacgga
     4741 cgcggtaacg gcgtaattca gtgcccgttt aactgtgttg aagaggtgat ggccgacatc
     4801 gcagcaattt tccattggtt gccgtcggcg atggatgcca tgccagtaga tgaattactg
     4861 gcatggcgca gccgagcggc cgttagaagc ggaaactcgg aatgacagat cgcaatctca
     4921 atattcgcgt ggcgttcagc gcgatcaata atatggctcg gcccgtcagt gctgcacgca
     4981 gcggcacggc ggcgctggcc gatcaaatca gagcaacaca aaacaccctc aacggactag
     5041 gacggcaggc cagcagcttt gaccgactga gcgccgcatc cgctaaaaca acccgcgaac
     5101 tggaacaagc gaaagccaaa gccgctgcga tgcgcgccga atttggcgca gccagtacac
     5161 gaacggatga acaaaacgcg gcactgaagc ggcagcgtga gcttatccgg caattatcaa
     5221 ccgctcagac aaacgaaacc gaacagctaa agcaattacg gacagagctg gcacggcatg
     5281 gcgtgatact ggatcgcagt cgccgagcga cagaccagat tagcgatcaa actgcgcgct
     5341 ataaccgcca gttagcggaa cagcaacggc gactggcggc agtgacacag gcgcgcacgc
     5401 gctacgatcg gatgcagcag acggcaagca acctgcgcag cacaggcaca atggcgatcg
     5461 gtgcgagcgc tgccggtgcc tatgtcggcg ctcgaatgat ggcacccagc ctgcaatcag
     5521 ataaaagcgg cgcagtgatt gctgcgcaaa atgctgaagc ctcatcaatg ggtacgcagt
     5581 attcacgcat gattaaaggc atcaatagcg acggggtgag tgatgacctt gcccatatcg
     5641 caaacaccct gtctgcggtg cgtagctcac tgggcgcatt gggggaagta ggcagtgctg
     5701 agttagacag gatcacgcgc aaggcgttgg atatgcaatc cgtgctcggc ggtgatacgg
     5761 ctgagcatat ccagattgct gccattatga tgaaaaatgg ccttgcagcc agcagcgacg
     5821 aggcatttga tttgatggca gcgggaatgc agcgcgtgtc atcacaaatg cggggcgaac
     5881 tgcccgaaat actgcatgag tattcgacgc atttcaggaa tatgggctac agcggatcag
     5941 aagctatgac gctgctggtc aatatggcgc agcaggggaa atttgcgctg gataagaccg
     6001 gcgatgccgt caaagagttc tcaatccgtg gctctgacct gtccaaggcc agcgtagcgg
     6061 cgtatgacac catcggcttg aatgcgaaac gtgtcgcgtc ggccatcgcc agtggcggcg
     6121 cacaggcgcg taacgcgatg cagaaaaccg cgcaggggct attgaagatt aaagaccccg
     6181 ccgagcgagc aaatgcggct attgccttat ttggcacgcc aatagaagac ctgtctatcg
     6241 atcagatccc taactttctg tcagcactgg caaataccac agaccagttt agcaatgtca
     6301 gcggaacagc ggatcgcatg ggcagcacgc tacgcgataa cctgtcgggg gatatcgaca
     6361 agctgggtgg cgcactgagt gggttacgtt ttgccatctt tgaaaatgac tctggcgttt
     6421 tgcgcaaact ggctcagggc gcgacggcgt tagtgaatag cgtccgcgag tgggtaacgg
     6481 ctaaccctga gttggctcaa acgctgctcg ttgttgttgg cggtgcactg gcgctcaccg
     6541 cagccatcgg caccgtctct cttgcgactg gcatattgat ggggccattt tccaaactgc
     6601 aacttggcct atccctgtta agcggtggta agggtattgg caccgttaca agtatgttca
     6661 gcaggcttag tggcgttatg accggtagcc tgtccagcac ccgcgcgtgg ggtggcatcc
     6721 ttaccagtat acgcagtggc atcggtggaa tcggtggtat tgcccagagc gctggccgtt
     6781 ccttgctgat ggcattcact cagccaggcg ctgcgttatc tgcgctgggg aatggcgtgc
     6841 ggatgctggc gacatcggga ttttcggcac tgagcggatc agggatggcg gtatttaaca
     6901 ttctacgtac tggcctcatg ttgttgttga gtcccatcgg gttaatcggc gtagcaatca
     6961 ttgctgctgg tgtgttgatt tacaaatact gggagccgat caaggcgttt ttcagcggct
     7021 actttagcgg tctggttgct ggccttgaac cggttaagca atccttctca gcactatcac
     7081 ctatttttga cgggatcggg cgggcgatta gtggcgtatg ggattggttc accaaactgt
     7141 ttgaaccggt caatgcctca tctgaatcac tgaaacagtg cacggacgct gggcgggtat
     7201 tcggtgaagt ggtcggggtg gcgattggcg gcgtagtgac ggttattttg aaagtggccg
     7261 aagggattgg ctggatactg gaaaagctag gtgttatccc tgaagccgca aacgccgccg
     7321 tctcagcatc aaatgccatg aacggggcga tcccacaaaa aggtgatgag cctaaaaagc
     7381 ctgttatgta tgtgtgggat aagaaacaaa agaaaatggt ggcgcaggag tggaagccac
     7441 agccccccaa agaagccgat gcggttatta aaaccggtga agcagcaaaa cagccggcgg
     7501 gtgaaagcaa tacccctaaa cccaaaggtg cattgcagga tttgactggc agcaacccaa
     7561 cgacagcaaa aacaggcagc aaggcaacca cagaagagaa aaaagatccc aacaagctgg
     7621 gagatatcgt ttttaaaaat gtaccgcccg ccgtcatgct ggcgaacggc taccgtgaat
     7681 cacaggttat gcctgcacag cccaaaatcc cattactgga acgcgtgaag caaaccgccg
     7741 gcctgctggc cgcttccgtc ctgccgttca ctgtgcaacc cgttggggca gacgttccgg
     7801 ccatcaattc acctgcagca cagatgagaa cggcgatgtc tgccggtatg gccaacacag
     7861 acaaatatga aatcaatatc acgattcagg atgcacgcag cctggatgaa gacaaactcg
     7921 tcgccagatt gcgacgggaa attgatgaca ttgaacgccg caagcagagt cgccagcgct
     7981 cacaactgac cgatcacgta tagggttttt atcatgatga tgattttggg tatgttcgtt
     8041 ttcatgcggc aaactacgcc gtatcagtcg ttgagccatg acagcacttg gcggcacgtt
     8101 aaaaatgacc gagtaggtaa atccccgcat tatcagtaca tcggggcagg cgaagataag
     8161 atcacgctgt ccggtgagct gtatccagaa ataaccggcg gtgacgtgtc gttaaacgtg
     8221 ctgcaaacga tggcttacac agggaaagcc tggcccttga tcgaggggac ggggaatatc
     8281 tacggtatgt acgtgattac caacatcaat gaaacccgct ctgaattttt cacggacggg
     8341 aaagcacggc atatctcatt cacgctaaat cttgagcgtg ttagcgagga tttacgggaa
     8401 atgctgggtg atatggatat cggattatcc ttgtgacatc gacgctttta actgtgctcg
     8461 atgaaaaaag cccactgcct ggcaaacagt gggcttcgct ttccccgatg tatcattatt
     8521 gttttaaaac catacacata atgacatcgt ggttgactat tttataaacg tttatacaga
     8581 tcaatttttc gttattgatc ggctgtaacg atcaattctt catccggtac catcggccat
     8641 tcaatagccg ttgcgcttac atcaacccga cttagcaata cggcgtattt ttgccactct
     8701 gccagtgccg ctttctcgtc atctgtcgca atgtccagat tgaccgcata cgttagttcg
     8761 ttgatgcgtg ccgtggcagc ggctttgcgt gctgccagtt cctgctgtgc cgtcttgagc
     8821 gcggctgcgg ctttcgcggc tttgtcgatc acccactttt taccgttcca catgtcgaat
     8881 tcggtaacag gtttcagcag cgtgacacct tccggcagat cgccgaactg cgccacggtc
     8941 tgcgcctgtc gggtttcggt gctgtagacc gtctggccgc gatagtcttg tacgacttcc
     9001 catgtcttcc cgtcaacgga acggcgcagg gcttgaccaa cgggcggtaa cgctggctcg
     9061 tctgcgtagc tgtcagcagg caggccaacg ccctgcatga catactcata acttgcactc
     9121 tgatattcgc gtgtagcagg attaacgtga taaaccgtaa tccagcccgt gttgattgct
     9181 aacccgcgct cattcagttc tgcgtttttg atttgtgttg aatagttgct cattatgctg
     9241 ctctcacgat gtagttaaat gcgatgttac gcgggcggtt ttcatttgct gtcggtactg
     9301 tgcgtcctgc gtcaaatttc atgcgagtcg ggcatgagtt accagcagca tcaggaatcg
     9361 cgccgactgc gaattcgtat agcagttcaa atacaccact cgacgacaat gtctcaccaa
     9421 gaaattgctg gcttgctgcg ctagtccaga tttcgccgac tatgttcctg atcgcgtcac
     9481 tttgagcgct aagcagagca cgaccagaat cgacgccgcg cccgtcatcc caaccccgca
     9541 taaattcacc gcgcaagtct ggtaaaacac ctgctggata tgctgcggcc agacgcggaa
     9601 atgcggatat atcaaacgat tgaccgttac attttagcca gccggttggt gcagtggcgc
     9661 gcggccacgg ccgaggcatt ccagctgtcg ccgccaattc gttttgcaca aactccgttg
     9721 atgcgagctg cgttgtgttt gtgccagttg gtgccgttgc accatgcggc aatccataaa
     9781 agttgattgc gccgtcggca attctaattg acgcgcctga ccgatgttcg agcgtcagcc
     9841 cttgctcatc tgcaccgtag cgcagaccaa cgaacgctat cgctgtatca ctcgcagcat
     9901 tgttgaattg tatatatgca cgttgtcctt gcgcttttgg ctttattgtc agcgcatcgt
     9961 catcagccga tagtaatttt ttccccgtaa tgacctggaa cgtgtccgta ctcactgcat
    10021 taatattgga taaaaataat ggcttattcg gaatgtctgc gccgttctgg tcttttgcta
    10081 aagctccaac ttctgcggca cttaacgcaa tatcagcagt cagcgctttg ccgtttactg
    10141 ttcgccctga cggcacacgg ctattggcgt ttgtgttggc gttgttcgct gcggtgagta
    10201 ctttgcctac ctgagtatcg gtttcagctt ttgtgtaagc ccctatatcc acggcattta
    10261 atgcaatatc ggcggtcagc gctttgccgt ttactgttcg ccctgacggc acacgtccat
    10321 tggcgtttgt gttggcgttg ttcgctgcgg tgagtgctgt gcctacctga ttatcggttt
    10381 cagcttttgt gtaagctcct atatctacgg catttaatgc aatatcggcg gtcagcgctt
    10441 tgccgtttac cgttcttcct gacggcacac ggccattggc gttcgtgttg gcgttatctg
    10501 ctgcggtagc ggcattattc gcagtagtaa cggcggcttt cactgcccgg ggggttgcgg
    10561 ccagagcttc actgtcgctg ttcgttgcgt tacttagttg tacaaaacct tttgcgttta
    10621 gcgtggcgtc tgggtgtttt cggcctctct catgggtgtc gatagcgtta tcaacatagc
    10681 tacgcgttgc cagcacgaca gatgggtcga ttttcagcgt cacggcatca gtgctgctga
    10741 caatcaggat catacgcacg gtctgtatgc gtccgctgcc ctcctgcaat tggggtttgt
    10801 acgtctcagg acagttggcg atagcaatca gattgccgtc gtcatcaaaa agaccgattt
    10861 cacgtatcca ccacccgcct tcattttcag gaatgacctg ctcggcaatg atctggctgg
    10921 ggttttgtgg gtcagtgctc aaggtattga ttgctgcgcg gcgtttttca ttaattaacg
    10981 tgagttgtgc tgggctcggt gtcggcaaga tgccgccacc atcaccaacg gccatttgtg
    11041 tgatattcag gcgactccct aacgccgtag cattagccag ctttgccgcg ccaatgttcg
    11101 ttaacaggac aagatatttt gcactcatgc gtttacgctc acgttatcga ttaaatgtaa
    11161 tgccgcgact gtcacttcca gaccagacac agtgatagtc tcagggaaat aggggtaaac
    11221 ggtcagcgtg tcgccgctgt agctagttgc cgcgacgtac gctgcgcctt gcgtgtccag
    11281 gttgatattc agccccagca ggtgacgtga tgcaggctta gcgtcagcaa tcagccgctc
    11341 aagctcgttg aaaacttctt cggtaatacc actgtcttgc acgccgatat caagccgaaa
    11401 cgtgcctggc tcgccaccgt actgccacca ttcgataatt ctgatcagat agccgaacgg
    11461 ctccacaacg cgacgcagtg cgccgatggt gcctttgtgt cgatggatga agtaggcatc
    11521 ttttatcgcc tgacgcttga tgatttcagg ccatttttca tcccagcggt caacagagaa
    11581 tgcccatgcg aggtagggca gcaggtttgc cggacacgaa tcagggttac ataactggcg
    11641 cagcgggatt ggcgtgcggg ataattccgc acaggctttt gctgcggcaa tctccaactc
    11701 ggatgaaccg acaggtaaca gactgttatt catccgagcc cccgctattc agtgtccagt
    11761 tagcgcagta ggaggcctgg cttttatcca gcacgatatc ttcggcaggg cttcccaaat
    11821 caacgcgctg cactccttcg acatgaagcg cagcgaatat cgcagagcgg cgaatatctc
    11881 ggcctaaccg atgctgcgcg gtgatatagg cctgtaggcg cgcttctgct gtgatgcgaa
    11941 tcggctcggc ttccggccct gggtagaaat acagcgtggc ggtaatgtca taggggatga
    12001 tgacagcgga ttgaacggtt acccgatcgg caaccggccg cacgttctcg gcgtttagtg
    12061 cggcattaac gacctgcaac agcgcattgc tggcactgcc attaccgtca cgtgacagca
    12121 cggtgacagt gacggtggca gggctgggac ttacggcgct ggcgtcagcg actcgaccat
    12181 cggcgctacg cgcatgaaat tcataggccg cagtcggccc cgcaacgctc aacccctcaa
    12241 atgcttgctg cgcgcgtgta cgcagatcgg cgtcagactc catgaccgcg tcaatgaggg
    12301 ggatcgcttc agtatctgtt gctgtgataa ccaaacgctg cacattgaag ttagcagcaa
    12361 gctgttcaag gtcgctttcg gcagcgtagg ctagcatgtt ggcgctggcc gcttcgttaa
    12421 cccgctgtcg caataacaac tcatgataga cggacagttg cagcaacttg gttatcgggt
    12481 cggattccag cgccaacgtg cgcgtgatgg catcccgttt ttctaacgga aacagggcga
    12541 taaacatcgc tttacgctcc gcgtacaacg tttcatagtc cagcgcttcc acgacatcag
    12601 gcgcaggcaa tagggataaa tcaatcaatc cgctcatcac gccccctgta gtgaaaccgt
    12661 ggcgctaaat gccgccatat tatccgtacg cttcgcctga agtgtgacgg caacgagtcc
    12721 ggcaccacgg gtttccagcg tgatttttgt cggtgtgata cgtggctccc agcgcattaa
    12781 tgcactgtag atggctgacg ttatctttag ctttattgcg agttcttgag gttcgtcaat
    12841 tagagaaaaa agctgcgaac cgtagctacg acgcatcact cggctaccga caggggtgat
    12901 taaaatatcg cgtactgact ggctgatatg ctcatcatca gcgatagcgc gaccggtact
    12961 ggcattcatg ccgatgtatt tttcattact cattgcgggc cgtccgtttt gctaccgccg
    13021 cgctgtacgc cgccgtgtgt atgactgtct acaaccacgc cgtttgatga tatttggccg
    13081 ccggtgtggg tgatatcacc ccgcatcgtg ccgccttttt ctacgctgag cgtttgcgtg
    13141 ctgagatgct gggtgcaaat cactttagga gtgtccagcg tgatagattc agccgcttca
    13201 acgatcacat ttttgacgcc tttaacggtc atcgttgagg tgtttgcatc atatgtttcg
    13261 ctggctccat cgggataaac ggtagtgtgt acctttgggg tgttgctggg cgcactgtgc
    13321 tgattggaat acaaactgaa cacgatcacc gctatttcca gatcgccgcc tggtgcgacc
    13381 ataacaacct gctcaccaac cgacagcggc caccacgttt ttgcatcacc tgcgcgtgcc
    13441 acaccccagc gtatccagtc agtcgtattc ccgccggttt ctacgcgggc taaatgacgc
    13501 gcatgatcga catcgataac cgtaccgata cggatcaggt tatgcagcag gcggtcaaac
    13561 tcattggtgg tcatggctgg cgctcggtaa ttaattcata gcgccagttt cagatgtcgc
    13621 gcgcgggcgc acaacgaaag gggattgtag gggggcggta acaactaatc gggctgaatg
    13681 aagttcgtaa tgatatcagc tacccagtcg agatcggggg gcgtaaggcc cagcaattca
    13741 cggatggggt aacgcacgga cgagcgtcct attttgtcag cctcgccgaa ctggtgaata
    13801 cgcgcgatga tgcctgcctg accgctgaaa ccaacggccg cgctattggg tgatgtttcg
    13861 atgcgtaaaa aacggacggt acgcaacttg cggaacatct tttctttacg tgccggtgcg
    13921 gcggagacgc tacttacgtt aatactgaga tagcgatcga tgtcagcacg caggaacgag
    13981 cgcaaaccgc cgcgaccaac atcaaagccg gtaatcattc gctcaccgct gcggcctttg
    14041 ctgctgtgcc agttacgcag ctctcgcgcc tcacctttcc acataaatcg gacaccgcct
    14101 tgtgtgcggc gcgtttgctt tttacgccct tcgtacgacg aactatcggg attcttttgc
    14161 tgtgcaatcc gttgctgctg gcgcttacgt agccccgttg caatctgtcg tgataagcga
    14221 cgtcgttgat tagcggccag gtgttcgaca acagattgca gatacccatc caactcctga
    14281 aacagtgcat cgttctggct catcattgac ctgctgtcga gtcatgaaca accatgttag
    14341 ccacatcgcc atttgtcagc agtgaccatc cgtccatacc ttccatcggg tcggaaggcg
    14401 ggtcagcacg atgacgaatg ttgatttcgc cagcgtcatt gcgagtgacg atcaccgcct
    14461 catcggcctg aatgcggatc agtaaatcgg cagtgctatt actcagtaaa tcggcctcaa
    14521 acgtaatacc cgttttacgc cgttctgggt taagcaataa atccggctga tagattcgcg
    14581 cccacattag tattggcacc atcagcgtat cgatagaatg cgggtagtcc attgccagca
    14641 cttccagcgt gtagcgatat tcaaaggagg cggaacgcgc accggtactg attgcattac
    14701 ctttctgaac atagacgacc agttgatcag gattttcgcg taaccacggc acctgttcgc
    14761 taatggcttt tctcagcagc tccgctttta gcatgttatt tctctctctg ttgttcggcc
    14821 tggcgaatta gtgccttgtc gtggttggcg ctctccagcg cagccagcag caggctattc
    14881 cagttaacag actggccgta ggtcagccga ttattgacta tcgcgccctg cggcagcggt
    14941 attactgtcg gttcggttag gttcgctggc aggggaacgc acgctatcgg cacgtaaacg
    15001 gttcgcgtag tcgagcaacg gcacagcagc gccatcaggc acaaactcat cactacagac
    15061 ttgaccggcc agtgcctgat taatggtctg gctgcgtgta tcggcatctt gttgtatccg
    15121 gcgtttatca tgctcagcct cacgggacag cgtgttgaat atctggaagg tacgttgctg
    15181 attactgata atgcgactgg tactgtcccg ctcgttgatt aaggttgcca cttcaccgga
    15241 aaggcgctgt gattcttgtc ggtagtggtc agccagtgcg atagcagtga taaacagcag
    15301 cgcggcggct aatgtcgcta taacttttcc agacatagca ctctctcggc ctcgcggcgg
    15361 ttggttaacc cctgccagac ctgaccaacg gctttattcc agcggcgtaa ttcattacat
    15421 gcgccggtga gatcgccacg gttcagcttt ttaagcaggg tcgaacgctc aaatgctccc
    15481 gcccccacgt tgtagataaa actggctagt gcagcgcgct gtaactcact gagtggaacc
    15541 gtaaccaacc gatcgatggc atgaaacgcg ggctttaaat cctgctgtaa caatgcttcg
    15601 cattcagcgc ttgtcttgta gtcacccgcc tttacatcac cggtatggcc gtagcaaatc
    15661 gtccagactc ccgcaatatc acggtaagcg gcgttctctt ttccctcaaa aaagccaacg
    15721 aacacagttg ctatcaccaa tgcacacgcg gtaacgacgg gaatgatttt ctgtttcagt
    15781 gcttcaggta acatcacggc ctctgcgtcc tgtgtcctgc ccattcatca cgcgcaaagc
    15841 gtccagcgtt tcaggcaggt tttcatgatc aactttcctg accaactcac gcattaaatc
    15901 tgtgcgttgt acctggtcac gctctatgtt ctttttgtgg ttccggttca cccaaaacgt
    15961 gagcagcccg atagcaatcc ctattagcgt tgcccagtcg ctcaacgtca ttcgtcctgc
    16021 ggtggcgatc agcgtggcaa gcaggtaggt gatggctgac gccacgcgat ccgttgtcag
    16081 tcccatagct gtatgatttc ctgttgtgtt gctgcggtaa cgtctggcag cgtgaccagc
    16141 aagccagccg gtaacaatgg cccacgttca cacaatcctg gatttgccgc ataaacccct
    16201 tcggttacac cgtctgttct accgtaatag cgccagcaca gcagatcgac ggtgtcattt
    16261 tgctgcgcac gaacctccat cagaccaact cagccatgcc gcgattaacg ccgaggatgt
    16321 cgcgaatagc ccagcgtccg tcgcgccaca gcgtgtcaat ctgtgaactc aacgcttctg
    16381 cgtgcttttc tccctcgcgc gtggtgtcga tatcgcgata accctcaatc aacagcgctt
    16441 tggtgatgga atacaccgca cggcggtagc gccagaccag cacggactcg ccattgatct
    16501 ggtcgatttc gtcagcgcct tctgacttaa catcagacag ggaggcaaag ccgcgttgct
    16561 cctgactgcc tcgccagtcg ctcaactggc cgttaacatg cgctaccgct tcgatggctt
    16621 tatccatcag gcgatccgtt gtcacctgac catcgagacg catcgcacgg cgcagggctg
    16681 acagaacaat caccggccaa aatgcctggc tcgtcacttt cgcatcccca tcgttgatgg
    16741 tgtcctgcgt ggccggcctt accggctctg ttgcaatcag gctcatggcg ttacctcaaa
    16801 agacaggcgg tggacgacgt aacacgacac aataaattgc ccatattacg ccgtgccgcc
    16861 tggtgcgcgg gggcacgttg ggttacgacg cgctttttcg ggcgcgtggt gtcgtagttc
    16921 gtgatgcttt cgccgccgtc gatttacgcg gcgctcttgc tgctttggcg acggggttgt
    16981 cggctggatt atccgcaggc ggtgtcggag gcgcgtccgt gttttctgtt tctgcctcgg
    17041 ttgctttctt gagcgcccgc cccagtaact cgatatcgcg tttaacaccg atgccatcaa
    17101 acaaggtaac cgcccgttgc aaccagtcgc gcgcggcgct cagttcgtta gcatccagac
    17161 gcaaggtgta gcccagcgtt ttgtaaagtt tggcgcgcac ctgatctggc atgtcttcgc
    17221 cagcggtaag ctgttccagt tgcaacagca gcgcagcggg caaaggcgca cggctggtat
    17281 cagccttgaa gaccgccagt gccggatcgc aaatctcatc aaccagcgtg gtggcgactg
    17341 tgcgtttgta ctggtcgggc atcggcaggc gatggcgcag gacataatca gcaatacgca
    17401 gcgcatcgct agtcaatccg gcatcgatcg accagatcat gatggtggtc agcacctcat
    17461 cagcctggcc gctatctgcc gccaagacgc cattaaccca gccctgataa tcgggtagca
    17521 gttcccgctt cagttcggcc tttgtcgcgg cagattgcac ctggcttaaa cgggatttat
    17581 ccatcctcag ccgatgcagt tgctgttcgt aggcggtgtg ctcaacgtca ccgccgtttg
    17641 atttgccgtg gcgctgggcc atgacagttt gaaaatgtcg ctgtgcaggt gtcagcatga
    17701 tgcccccttg acgcaggccg aacgttatcc ggcccgctgt cgttgaaatt agccttctac
    17761 tggtgcaact ggtgccgctt cagcaaacgt aatgccttca atcaggcacc ccgtgccgta
    17821 gtcttcaatg acataggcgt cattggatga ctcataggtc gcaatacggt tgcgttcagg
    17881 ctcatcacgc acggcgcggc gttgcttgtc ttcctgccag tagatcgaca ggttgctaaa
    17941 cggggtaatc aacatgctgc catcagggaa gaacggcgcg atgaaggttg gcaggttacc
    18001 gatagcttta cgcgatacca gcaactgacc agccagcgct tccgaattgg ggttgttggt
    18061 attgatggcg ttaatcagcg ggaactcttt actgaccaga atctgacggc cgcaaataac
    18121 caccaggtct tgtgatgttt taaaccattc atccagcagt gaattgatgg cgtcatagac
    18181 cacggcgtcg aggttgccgt aatcgccttt cgcgatgact ttattttcat catcgcggct
    18241 ggtgactttg atatttttca ttacgcgctg tgcggcatgg cggcgatatt tttccagcca
    18301 gccgatattc acgtcctgca acagcgggtt ggttgccaga ttggatttat ccgcacgcga
    18361 ggtgccgtta aaaccaatca tgatgcgatc gagcgcttta cgcttgatga tctggttgct
    18421 aatgcgctgc tggaagtcgg ggaatttggc ccacatatcc aactgcgggt agctgatgaa
    18481 ggtatccgta ttggtttgct cacagcggta tttatcatca tccatcgtgt gaacggattt
    18541 cggttcacgc cgatccgtgg ttgacgtatt cgagctggat acggggccgc tgatacccag
    18601 ccccagtttt tgaccttcct gatcggatac gccggtgata ttgatctttt gcagcaactc
    18661 gctggattgc tgaactttat cttccagttt ctgctgtact gacggtgaga tgctgaactg
    18721 ctgggtaacg tgcgcaggct ggacgctgtt aagatcagcc tggcgattaa tgtaagcgtc
    18781 gtacaacacg cgggtttcgt tcttcatgtt aggttcctgc gatattcggt ttaaagggtg
    18841 attagcagtc tgctaacaca acgttggatt gctgattgcc accagaggca ggcgggcgct
    18901 ggctaaagtt gccatcctgt ccggcaagct gtgctttcag ctcggttaat gattgcgtca
    18961 gcgttgacac gttgcctttt agttcggtgt tttgcgtttg caacgcactg aatgcttcag
    19021 ttttatccaa caaatcacgc tgactttgtg cgatcagttc aacggcttgt ttcagctcac
    19081 cgttttcttt attgaaccgc tgctgactgc cggttagcag ttccgtgatg cgggaaaaga
    19141 agtttcgccc agcgtcgccg gtcggcgcac cgtcttcaaa ttccagcgtg atcggcgtat
    19201 cagcggccgt gaagaaacat tcagggctgg tttttcgccc atccaacggg ccttttccgc
    19261 cgcacttggc gttaaactcc agaatgccaa cgcccagact ggcgggatcg tccgtcattc
    19321 ccaaccccat cagataggct tcgccggtgt cagcgaaaga ggggtgaatt tcaatactgg
    19381 ggtaaatctt ctggcgcttt gtgttcaatg ccaccatgtc atcagtggca tcaatcttga
    19441 tttgtaacgc gagtttgcct ttgagcggcc catcctgaat ttcaaactca ctgacttctt
    19501 ctacatcgcc atacgcccga aaatcgctgg ttggcgagta accgcgaatg tgttcaaggt
    19561 tcacgcgcgc accgcgcacc tgcttgttga agtttttcgc catttgtgaa atatgcacgc
    19621 gctcgagcat gcggccgtcg caggtcgcgc cctcaacagc ggcaagaaac ggttttgaaa
    19681 tcggcatgtt aatgctccgg tgataacagg gtgactgtct gataccccta tcatcaccat
    19741 gcttcaccgc aggcgctatc ggtgccgttt gtggcggaac cacgacaacg ggagccgata
    19801 ttttgccgcg cgcgggcgcg atagcctgta tgcatgaatc tactttccga tatccgcaac
    19861 gaagccaaaa gcctttactg gcaggcttat agcatccctc aaatcgctca gcggctgggg
    19921 gtgagtaaca acacgctgta ttcatggcgg aggcgcgata agtgggatga cagcacgccg
    19981 atccagcggg cgcaggagcg cacggaagtg cgctatttac gattgatcga gaaagacgac
    20041 ctcacgccgc atgactttaa aaccatcgac ttgttagggc gtcagatggc gcgtttttca
    20101 cgcgatgaac gaaaggatca ggaaaaggag acacggaaga aagcgccgaa gaaccatttt
    20161 accgacgaac agatcgcaca gctccgcgcc ctggtactgg gatcactcta cgagcaccaa
    20221 aagcgctggt acaaaaagcg caagcagcgt aaccgcgcga tactgaaaag ccgccagata
    20281 ggcgctagct ggtattttgc gcgtgaggcg ctgttagatg cattggaaac cggcactaac
    20341 caaatctttc tgtcggccag ccgcgcgcag gcgtaccagt tcaagcggtt tattcaactg
    20401 ctggcatcaa gcatcggtgt ggagctgaaa ggcggggacg ctattgtgct gtcgaacggc
    20461 gcaactctgt actttctcgg tacgtcagcg gcaaccgcac agagttacac cggcaatctg
    20521 tactttgatg aattcttttg ggttagcaac tttcttaacc tgcgtaaagt cgcggcgggg
    20581 atggcgacgc aaaaaggatt gcgccgcacg tacttctcca cgccatccag tgaagaacat
    20641 gaagcctata cgttctggac aggtgatttc tttaacaaaa gccgccctaa agcggaacgg
    20701 gtagagatcg acgttaccca caaggtgctg aaaaaagggc tactgtgcgg cgacaatatc
    20761 tggcggcaga tcgtcaccat tcatgacacg ttagagcaag gttttgacct ggttgatctg
    20821 gatgaaatta agtctgaaaa cagccctgac gattttgaaa acctttacgc ctgccgtttt
    20881 gtcagcgtcg gtgagcgggc ttttgattat accgcgctga ttaactgtgg cgtggatggc
    20941 tacaacgatg acgtatggcc ggactggcga ccctacacgc agcgaccgtt aggtaatcgc
    21001 cctgtctgga taggctacga tccgagcggc gacagcggca cgggtgacag cgctggtctg
    21061 tctattgtct caccgcctgc cgttcctggc ggtaagttcc gcgtgattga ggtacggcag
    21121 ttacgcggca tgacctttga aaaacaggct gaagtcatca aagagctgac ccaccaatac
    21181 aacgtgcagt ttatcggcat tgatagcacc ggaaacggta gcgcggtgca tcaacttgtc
    21241 gtcaaatttt tccccgccgc cgtgaaatat caatactcgc ccagcgttaa acgcgaactg
    21301 gtactgaaag cccaaatgct gatccgtgcg gggcgctttg agtacgacgc ggggatgatg
    21361 gaactggcgc ggtctttcat gacggtacgg aaatttgtta cgcagggcgg catgacgtcg
    21421 tatgcatcag acaggacaaa aggcagcagc cacggcgaca tagcgtgggc aaccatgcac
    21481 gccttacaca atgaaccaat cggcagcgag tcgggcggta atgatggatt tattcaggag
    21541 ttctaaccat gtcacgcaag aaacattact cgcacacagc cagccaacgc agcccagcgg
    21601 cacagacacc cgtaacaggg gaactgatcc agcagccgat tgagtcgcta cagtctttct
    21661 catttggcga tgcccaaccc atcatggaca gacgcgactt gttggactgc atggagtgcg
    21721 ccagaaatgg ccgttggtac gagccaccga tcagtaccta cggtctggcc cgtatgtttg
    21781 acgttgccgt gcatcatcag tcaccgatac tgttcaagcg caatgtcatc atgtcctgct
    21841 acgaaccaca tcccctgtta tcacggcagg atgccagcgc ctttgtactc gactggttgg
    21901 tattcggtaa tgcgtatttg gaactgagaa agaaccgcat cggccagcca ctgaaactaa
    21961 agcataccca tgccaagtac acccgacgcg gggagaacct ggatcaatac tggtttgtga
    22021 cgtactacgc caacgatcac gaatttgagc caggcagcgt gtttcacgtt aaaagcccta
    22081 gcattcacca ggaaatatac ggtacaccgg aatacatggc agtgatccaa tcggcgatgc
    22141 tgaatggtga ggccacgctg ttccggcgta attactacat caacggtagc catgcagggg
    22201 tgatcgtcta tctcaccgat cccatcacca acaatgctga cgttgaacaa ctgaagaagt
    22261 cgctgaaaga tgcacgtggc ggcggggcat ttaaaaacct gtttgtttac gcggcaggcg
    22321 ggaagaaaga cggccttcaa atcctgccat tcagccagat tgcagccaaa gatgagttta
    22381 ccggcatcaa ggacgcgacc cgtgacgaca tgttagccgc gcaccgtgtc ccacctaatt
    22441 taatggggat tatgccgaac aatgcagggg gatttggtga cgtggagaaa gcggctaagg
    22501 tcttcgccat aaacgagctc atgccgataa tggaaagcct gaaagagctt aacgactggc
    22561 tagggatcga ggtacttcgg ttcaagccgt atgctctggc cgacagtgca atgtaaccgc
    22621 gaaagtcatt caaaaccatt cacctagcca tcaaacatca agccggacag ccgcaaggtt
    22681 gcccggtttt tttacgtctg cgtaaacgca cctgaatgcg attctgagcg acgcatcagc
    22741 cgaatgatgc cgtgattgac tgagatcgag acaacacaat gacgacgtga tgaggatgca
    22801 gcagcatatg aaccagcata cccatcttat ccccctcagc gcgcgagggt tcccccgcca
    22861 cgcccgcgcg ctaaactcgc ctctttttgt gcaatatctc agggtagagg aagccgcgcc
    22921 tgggcgggcg cggaataggg tttactgatg tgaaaaattt gtgcagagtt ttgcgatttt
    22981 gttcattgta aaaaactgcg gtggcttttt gaaaaaaagg attccatagc ctgttaatta
    23041 cttctttttt gctcttctga tatgaaggct gtcttcgcta ggcagattgc gccttatcac
    23101 tttgctcttt ctctttaagc ttcacgtaag ttgctgtatc aaaaaaagaa ataccttcaa
    23161 ttgtatcttt tggtaccaac actctgaaat catccaaaga cagcctgcca tcatcaaaac
    23221 cgccaccgat tccattatca atatagtgac gtctataatt tgtcgtcact gtaatcgtta
    23281 aatcatcttt atcacgatag ccactaagca aaggaagcaa ttgcagatat tcagcccgtc
    23341 catgctcaaa ttcggggcag gaaactatac ctacataaaa ctttcttgtg ctaagtgtaa
    23401 taataacggg gaattttctt acggctgctt caattaacat actttcatag ggatcgctgt
    23461 gaacagcttt tattaatgcc tcgatccgcc gatttgcatt tttgcatgta taccaccgca
    23521 tcattcggcc agaaccgaat gcaagtaaca ttgaggaaat acaaaacaaa gcaaacttga
    23581 aatccgtaaa cttaaattca gttgctgggg acaatgggaa aaccttattt aatgaatcct
    23641 tatcaaaaaa ttcattaaat aaaagcaaat tataaagcca tcgaaacgcc cctaagacgc
    23701 ttaacgcaga acaaaaaatc caagcacaaa ctgtaaatac aacgccccaa gccgcaacat
    23761 aaaaataagc gctccaacct tcggagcgct taaaaatgta tctagctgaa accgagctaa
    23821 caacgtatag ataaccacta atcaacgcca aagctaaaac gagagtattc atccagcctc
    23881 acgctctctt atgcagggat cgttagcttc gacatccggc agactctcaa tctgatgcct
    23941 tatagcttct ataactgcat cattattaag gtttaactgc acatgcccat tttgacttat
    24001 ggtatagcta cctacgttct cttgcagagc ctttctcaat cgatctttgg aactgaaaat
    24061 taagtctgtt gtaataattg acatgttgtc ctcccacatg attttcgtta accacaggaa
    24121 acttaacgaa aaaaacaatc cacagcatta tcaacaagta agttatccta gttctattat
    24181 agatcttttc tgtggataac taatgtattt tagtgtttat gtatagtaaa gatgcctcta
    24241 tagcaataaa tttatccatt tataaatcaa aattggcttt atccactaca tgtagtgcct
    24301 taactgaaaa atcggcatat tcatatcatt acccagatca aatgaatgaa gaagccattc
    24361 tatggacatg gctatgaagc ctcacgcaat acggcgatgc gttgcagcag atccgccgct
    24421 ttatcctgat attccacgtc tttttgctta cttgtaggtg ttcgacatag acagccgtca
    24481 gcgctggcaa cgtaggcata acctgcgagc gtgatcgcgt tgcctgtttc caaccgccgc
    24541 agctcaccgg cgctgatatc ccagcccagc gaacaggcga aatcggcaat actggcgcgc
    24601 cagtcgtccg accgtttact aacagtctgt ttttcagtcg ctttaatggt ctgagttgtg
    24661 gacgagtgtt ctttatgtcg ccgatccggt ggctttgatc gaagacggtt gagcaatcca
    24721 cgccgttccg tgtcggtaat gtgctcaaag tccgtaattt ctggctctga cgcactgcca
    24781 atctctctat cggcgggttc ggaaatgctt attttttcgt cgcccgtaga gttattgaca
    24841 gaactccaag cgtcgccggt tggcgacgta acgaccaacc cacgcccagc gctatcatta
    24901 gtgcctgcgt ctgctacttg ttttttgcgg attttccact taacgagacg ggtacagata
    24961 cgcgatagct cacctaagcg cggcgagaaa acaccaaaga ttttttctgg cgtctcgccg
    25021 tagtcgtttt gctcgtctgc atcctcatac gcgatacgca cggtgtatag ctcacgcggg
    25081 attaacacgc cgccttgctt ttcgatgtag gtagcgaaac agcctgcgtc cgcagaggct
    25141 agtacggcat ccattgcagg atcaccaagc tgcgcggcac cacgcctgaa ggttccggcc
    25201 tctttctgca ctgcggtaag ctggttcgcc agcttacgta gttcgcgcca gacagtgacc
    25261 ggcggcaggc cgaacggctg aaactgccgg atgttatgtt gagacgccca agccatcgca
    25321 aaccgtgcgg tttcgcgcag aggctttccg gtttcgttat cacgctcacc gtcaagtgcg
    25381 tagccgtcga tgtttttact gatatatttg gcaacatagg ccgttgcact gcctttcttg
    25441 ggatcgagcc ttttcgcttt aaagcgtgcg ccggtattac ggcccagctc cgcgcggtct
    25501 acagcgatga aatattcacg aagaatttca gtgatttctt tccggtcttc tggcggcatg
    25561 aatagcaata cgtgccagtg cggcgtagcg tcgtgatgcg gctctgcgac gcggaagcca
    25621 tacggacgca ggccgcgccg gttcagtttc gacatggctt tagcccatgt cttacataaa
    25681 tagcgctgcc cctgccgagg ggatgacgta tcccacttgg gattctgatg accactctga
    25741 atagtggcgt gataacgcga tgggcaagtg atagtaagaa aaacaccctc gtcactgcgc
    25801 gatattgcaa ccatttcgac acccgccatg cgcgtcatga gttcgtgacg gcgaataacc
    25861 ggattgctga cgcttgcgta aaccatattt tccagcgatg cgacgttacc gtcttcatca
    25921 accagttcat gcgccttaaa gaattcgcgg tttttgcggc gctgctcctg ccactgattc
    25981 agtgcatcaa tactgacgta aggcatccgt tttttatgga tcacgccgat ggcgcggaac
    26041 tggttttctc gccattcgca gcgcaaacgc cacaacttac gcccccacca gtcagggctg
    26101 atgatgcgca gaatggcgga gcaaatacgt ttttttgatt cgttatcgca aatgatcacg
    26161 ccccagcacg gcggcgttac ccgtagcgcc agcatttcat aacccaaatg ccagaaaagc
    26221 gcctggatct catcattggt catatcggcg ggcaatgtgt tgccgcattc ggtttcaaac
    26281 atttccgtga tgctggccgc aatagcatga ccggcgttaa tcgcctcatg tttcgtaaac
    26341 tctgccaaat gctgccagcg tgcgcgccag tagctggcaa gctctgacgt aaaaccgtca
    26401 cgcacacctt gcttggcacg cacagcatca agacgcagca gggctttttt cacggttccc
    26461 atgaaaaagg cgctgacgtg tcgcggctcg cggttggcgc gcagccattc tatttttttc
    26521 cggtaggtat cgcggataaa aaacggttgt tcgagtaagc gtgcttcaac accttccggc
    26581 gtttccatcc agttttgtaa tgccgcttga tgctcgtccc gtacagcttc tgcgaactgg
    26641 cggcgcattg tcagtaacgt tgaattaggc tcgaagtagt ccagccgcgc gacggcctgc
    26701 tcgaaatcca gatcggagaa agcggcgcgt gataccagcc gcttaagatg ctgctcgacg
    26761 gctggatgcg gctcaggggt atttacgaca gaagaagtaa aagattcagc gatcccctga
    26821 tacggcgaga tcgctggacg tggtgcattc cacgggtagg cccactgttc ggacattact
    26881 cacaaacccc agcgtaaacg ctgttgcaga ccatcggatc gacgacttcg cccaataaat
    26941 cgaactgtcg cccccccctg gttgttaatg cccaatctct gtaggtgtgg ataccgtgag
    27001 actcgacgct aatacactca atgcggcgct ctgatttttt gggatcgttt gttgagggga
    27061 agaatgttga gttctgacga cgagaacatg ccgcaacaag gcgttcccag cgcgctactc
    27121 gctcaacctc ttcaggccaa cgacggaaga tttctgcaag ctctgacttt ctggcatgga
    27181 tgcacggcat acagccgaca cggctacagc cttgctcata aagtggatta ggcttgacgc
    27241 cataccgcct agctaatgcg aaaacatcgg cgtgtttcca gtgaagaatg ggacgataga
    27301 tgctcagacg agggccaaga tcaaaaccgt tttcccattc tgacaaaagg gcgcgcgacg
    27361 cggattcttc ggcacgaaca ccttgccaag agacaacttc aaaccccgca tcaatgatcg
    27421 gttcaacaac ttgtagccgg ataggttcat gctttaactc agttgaacaa aaacggcgtt
    27481 tcgttgatgg aaagcgaccc ttccacatgc acagatcaag aaatgggatg ccggtgggat
    27541 gcagggtatc taacgcagta gcgataatgt ttgcggcctg ttcatcagta aaaccacatt
    27601 ctgaaacaag cgtgataggc cacttttcgg caatgaattt tcttttacct gcgatttgcc
    27661 gagaaaaatc ggcatggaca cgcctgattt tccctagttt ggattccaga taatccaaat
    27721 attccatggt ctgaggatgt tcgtgaccag tatcagcaaa ggcgggaatg tggctaacgc
    27781 cgttctccac ggctaatagc cattgagcaa ggctatcttt accgcctgag acgctaataa
    27841 cattgattgt gtcatcataa aaacaacgtg gatcaatcat cagaatgcct ctcacagtgg
    27901 aatcgggttt tcttcggatt cccaatagcc ggggagtaca tcgctatcgg attcatctcc
    27961 gcagccgtcg caggttttca gcacgccgat cacttctttt gcagcaccac gcgtgatgcc
    28021 gcttgcactg atagagcgct gaacggcgat ttcatggaat tgatagtgct gataaatctc
    28081 gcgcgtagcg ggggtgtcac tatttgagat aacaaccggc acgccgcgtg aaaggtttac
    28141 gctcaacagc accgccgcta aatctcgatg atggtcgtgg gtaaaagaag catggtgata
    28201 ttgcgtaaaa ttggccgtgt cgctggctgg caaatagggc gggtcgcaat agataacggt
    28261 acttttgttt atccctttga ttgtcagagt cttgcggaaa tctgccacgg aaaaaacggt
    28321 tttagtgtcg ttggcttttt cagcaaacaa ccgtatttca tgctcaggaa agtatggttt
    28381 acggtacttg ccaaatggga tattgaaatc ccctgcattg ttataacgac atagcccgtt
    28441 aaagccatgt cgattcagat ataaaaatag cgcggctgta actgtgctgg ggtttgattt
    28501 ttgatagtta aagctcagcc gattaccgtt atacgcatct gcattattgc cactattaaa
    28561 tagctcacgc gcagtggcta ttaaccgctc tgtatcataa gcggcgcact gatataaatt
    28621 aatcagatcg gggttgatat cagccagcac atagctggga tagtcggtat tcaggaacac
    28681 agacgcaccg ccaacgaacg gctctataag acaatcccct ttcggtagaa gcgggagtaa
    28741 atcaggcagg acgcgggttt taccccccgc ccatttgatg aacgggcgga tcatacaatt
    28801 atctcctgcg acgagtgctc gaagcgttct gcctctttgt gcagcagttc gatcacttct
    28861 gctgctgaaa gctccttttg ctgcgcgtga atggctagcg ctgccagacg ctgagcaaac
    28921 gaccagtgct ggtctttttt ttcttccaga cgtgcttttt ttagcagctc gataagtgct
    28981 tcattgagat ctacttttat ctctctaact tctgcatttc tcatcgttat ttcctttttt
    29041 caggtaatag aaatcccggc gggtttacgc ctttaaaaac ggaatttatt acggttaaag
    29101 aattaaatgt ttggggaata aactcacaac tgctttaagt ttattcatcg ccttaatcag
    29161 ctttgctttt tcttcagtta tcagttcatt aaatttcagg ttacgccgtt ccttatcaat
    29221 atctgctaat tcaaatatcg ctgacagtac gcgcatattt tgatgataat cgccgtctat
    29281 cttatctcgc atatcgtcaa taaagcggca catgtctttt tcactgtttg tgttgaagtg
    29341 ttttcccctc agcatagcta tgtgattcag cccgtcagtt ctagccgcga tactcagtgg
    29401 aactgcgcgg acggcttcgg tgttagccat gacagttacg ccgcaatacc catcaagcgg
    29461 gcaaaccagc ggcgcttttg cttaggcgct ggcatatatg gctttttgct ccacggcgca
    29521 aaataagcct gcgcgggagt aggctggaaa cgctggccgt ttggtaattc cagccagcct
    29581 ttattttctt gcggggatgg tgatttttct tttaataaac gcgcggtgct aatcatgttt
    29641 aatccctcat gccgtgcagt tcgttaatat aagaagtcgc ttgccctagc gcatcaaaca
    29701 aaccgaatga ttgatcgccc tgacttatgc gataacgagt aatcggatta gttgctgttc
    29761 ttgggcagcg aataatagaa aagccgcgat aaatgctggt atgttcgctt aattttatta
    29821 atgcattatc aatacctaaa aataccagac ctttattatc ttcccccata ttacagcccc
    29881 agccacagca gccaggcatc acgctgttct ttcggtcggt tcatatacgc gtcacgcatt
    29941 gcgcgattga actccggtat aaatacccaa ttttcggcac ggcgcgggtt ggggttttct
    30001 ggattaaccc acggaaccag cggcaactta cccgcatcaa tcatcccttt cactgctgcg
    30061 tcagatttgc cgattagctc tgcaaatttc tgatacggca cagcgtcaac cggatagcga
    30121 acctcataaa caccatcagc cattatttcg actccctatt gttaattaat ggaatttgtg
    30181 ccggagtttt tagccacgtc cggcgcgtgg tttgtggtag gcttaaagtg cgaacaatca
    30241 gccaaccaca caaggaatta atatgatccc aaataaaata aatatccgat ctctggtaac
    30301 gcctgataaa gacactgatg attttcatgt cttgcataag cctgcgccgc cagaggaaaa
    30361 agacgacgag gaataattac tatgaacaag cagccaactg aatatgaaat taacttccgc
    30421 atctggtaca gctactggct ggagcgcatg actgaaacac ttaatcggcg aattgatgtg
    30481 tctattaatg cgataactct cacgcttggt tccgcaatat ttgcgactag tcatttcagt
    30541 tggctgtttg gcggcattat tgccgttctt agtggttttc gtatcgcttg gcaatatggg
    30601 caaaaagccg aatcggccaa acaacaagta aaaagatatt ccgcacttat tgatgatctc
    30661 cccgccatta cgatcgatga agctcgtgca aggctggcaa tgcttgagga gtttgatagt
    30721 gcagccctta atagcctctg caacccagca agaaatgggg cgtctatttc tctcaagctc
    30781 aagcacaggg aaaccctttc ctttgctgaa aaggctattt ctcttttggc tggcagtaca
    30841 ccccgttaat ccatcatcgt tctgagtaaa tatgacaggg ctgctaataa cggtggcttt
    30901 gtcatttctt tccatccctc ccccctatta gcaatctcag ttacgtgctt cgttaattga
    30961 tcacacgttc cgtgatactc tctttcgatc gccaaccgct tacatttgct tattaaggct
    31021 tgtgtttgcg gttggctttt cgcactccac ttggttccgt atatgaacca atggcgtaaa
    31081 tttagttccg aaagagaacc atgtcaatga catttgatga aaagctgaaa gccatacgca
    31141 gcgcggagca tctaagccag agccaattcg ctgttataac tgagatttct gttagcacct
    31201 taaaaaaggt tgaagctgga tatcacgatc ctggatggac catccttagc aaaatcactc
    31261 aacacccacg atttcaaaaa tacacactgt ggcttatgac ggataaaaca gcaccggaag
    31321 ctgggcaaat cgcaccggcc ctcgcacaca ttgggccaga ctcaacacaa tcaggccact
    31381 cagagaaaca gactggttaa cgctttataa acattacatt ttcactattt gttaccaaga
    31441 cagtgaaatg accgccggag ggctttctta tggcaattaa gaagctcgat gatggtcgat
    31501 ttgaagtgga cattcgccct atcggacgta acggaaaacg tatccggcgg cggtttgata
    31561 aaaagacgga agcggtagcc tttgagcgct atacgctgtc caggacggac aaaaaagagt
    31621 ggcagcacgg ttacggtgtt gagcatcgcc agttaagcga actggttgcg ctatggtggc
    31681 tctaccacgg ccagaatgtg aagaacggac tgattgagca ccgccattta aaacgaacga
    31741 ttgcacagat gaacgacccg gagatctgcc gcatcaacaa gcgttcgata ctggaatttc
    31801 gcacgatgcg attaacaggt ggcatcagct catcaaccat caatcgtgat atgtatcggc
    31861 tctcaggtat gttttcagcg ctcataaagc tggaaatcta cgcgggagaa aacccgttaa
    31921 aaggattgcc acccctgcca gaaaaacagc ctgctgttac gtttctgacg gaagcagaga
    31981 tcgccaggct tttatcggtg ttggatggcg atgcctacag gctggccgtg ttatgcctga
    32041 gcacaggggc aagatggggc gaggccagca cattacgggc tgaacaggta gtaagcagca
    32101 gggtaacatt catggaaacg aaaaacggca agaaccgaac gatccccata tcagaggagg
    32161 tttcacagat catcaaaact cgtgaaaccg gaaagctgtt taaagtggat tatccggcgt
    32221 tctgtgagca aatcagggca gtaaagccag acattccaaa aggccaggca tcacacattt
    32281 tgcgtcacac ttttgccagc cattttgtga tgaacggcgg gaatctggtc gctttgcaac
    32341 agattttagg ccatgcgagc attcagcaaa ccatgactta cgcgcacctt gcgccggagt
    32401 acttgcaaaa tgctattact ctcaacccat tacgggggaa aagtggcatt taaaaacgtc
    32461 cacatgttgt ccacactagc ggaaaatgtc ccatttttga ccacatttta accgcttgca
    32521 attgcttgta atcgcttaac atgcaattgt ttttaaaggg ttttcctgaa aaacccca
//
