# Supplementary material for: May the Phage be With You? Prophage-Like Elements in the Genomes of Soft Rot Pectobacteriaceae: Pectobacterium spp. and Dickeya spp
Source: Front Microbiol. 2019 Feb 14;10:138. doi: 10.3389/fmicb.2019.00138 (PMC6385640; doi:10.3389/fmicb.2019.00138)
Supplement: Supplementary file 2 [file Data_Sheet_2.ZIP › Supplementary_prophagesGENBANK_files/Genbank FILES _SRP_prophages/phiPc1.gb]

LOCUS       Exported               52342 bp ds-DNA     linear   UNK 02-AUG-2018
DEFINITION  phiPc1.
ACCESSION   .
VERSION     .
KEYWORDS    .
SOURCE      phiPc1
  ORGANISM  phiPc1
REFERENCE   1  (bases 1 to 52342)
  AUTHORS   .
  TITLE     Direct Submission
  JOURNAL   Exported Aug 2, 2018 from SnapGene Viewer 4.2.3
            http://www.snapgene.com
FEATURES             Location/Qualifiers
     source          1..52342
                     /organism="prophage phiPc1"
                     /mol_type="genomic DNA"
                     /note="/genome_id=6666666.356834"
                     /note="/genome_md5="
                     /note="/project=robertczajkowski_6666666"
                     /db_xref="taxon:6666666"
     CDS             complement(1..231)
                     /codon_start=1
                     /product="DNA polymerase III theta subunit (EC 2.7.7.7)"
                     /EC_number="2.7.7.7"
                     /label=DNA polymerase III theta subunit
                     /db_xref="SEED:fig|6666666.356834.peg.1"
                     /db_xref="GO:0003887"
                     /translation="MGYNLAELSKEDMDKINVDLAASGVAFKERYNMPVIPEVVEREQP
                     EYLRNYFRERVMFYRQRSLQFSRLPYEPKSK"
     CDS             604..1110
                     /codon_start=1
                     /product="Ferritin-like protein 2"
                     /label=Ferritin-like protein 2
                     /db_xref="SEED:fig|6666666.356834.peg.2"
                     /translation="MLKKEMIQKLNEQLNLEFYSANLYLQMSAWCGDKGFEGASSFLKT
                     HSQEEMQHMQRLFDYLDDTGSLPILGAIAAPPIDFDSLADVFKLTYEHEQLITAKINEL
                     AHEAMVLQDYSTFNFLQWYVAEQHEEEKLFRSILDKLALVKASEGGLFFIDQDLKKMSA
                     AAPSA"
     CDS             1393..1749
                     /codon_start=1
                     /product="Uncharacterized protein YebY precursor"
                     /label=Uncharacterized protein YebY precursor
                     /db_xref="SEED:fig|6666666.356834.peg.3"
                     /translation="MMKKFLLSIVLTSLSVNAFAAAKLANISRFEYGDRWAFTREEVQL
                     ICRPGNALYALHTGTLMQYPLNDVAIVQMNSGQVSAQPIDVIWLDDPKHPGQKKSLQPF
                     IERAEQLCQPNAKP"
     CDS             complement(2066..3145)
                     /codon_start=1
                     /product="Phage integrase"
                     /label=Phage integrase
                     /db_xref="SEED:fig|6666666.356834.peg.4"
                     /translation="MARTTRYDANLPRNLTYRKKYKSFYWRNPLTGKEMSLGQIARRDA
                     VSQAIEANSFIEQNFSPVALIEKLKVKKELTMTEWLERYDVIIKRRDLAANTYKTRSGQ
                     LATIQQSLGRKILKEITTKDIAEFLEIYLQQEKLSMAAGFRSVLSDIFREAIVEGHIDN
                     NPVLPTRTPQPNVKRERLELEQYKAIRCAAKKQALWFQLAMDLALVTGQRREDVAVIKF
                     SDIVDDRLLVEQGKTGNKLAIPLDLTIDAIGLRLCDVIEQCRNSSKTDYMISVGIRKNN
                     PNGAVELNGLTKGFVKARKASGIELDEKPPTFHEIRSLAGRLYEKERGKEFAQKLLGHK
                     SAKMTEKYLDTRGKDYVYL"
     CDS             complement(3194..3370)
                     /codon_start=1
                     /product="hypothetical protein"
                     /label=hypothetical protein
                     /db_xref="SEED:fig|6666666.356834.peg.5"
                     /translation="MNGANAIIQKTACRKYRRYNAGRELGKFTQHQKSMVENIELAKML
                     YLSTQKITSCHVG"
     CDS             complement(3468..4556)
                     /codon_start=1
                     /product="hypothetical protein"
                     /label=hypothetical protein
                     /db_xref="SEED:fig|6666666.356834.peg.6"
                     /translation="MKNSNVSLSEQNAVVNSNVALFDSQYLNAISAFAQIMAQGNATVP
                     AHLQGNQADCMAVAMQAAQWQMNPFAVAQKTHLIKGVLGYEAQLVNAVISRSGVLSNRF
                     EYKRFGPWEKIIGRFAIRKNKEGQEYRVPGWEMADEEGVGIRIWATLKGEDTPRELELF
                     LAQARVRNSTLWADDPYQQLAYLAVKRWSRLYCPDVILGVYTPDELEERNEKDVTPATA
                     TVSLKDIVATDAPEAIVSAQESTSNIDALADDFRDQIARADDVDKAKAIRADIETKKSV
                     LGTALFTELKNKAVKRYYQVNAKNQIEAEVNSLPQPDEPDAVEKFAALEKSLAAAKRHL
                     GDELHDQFAVTLCDMKPEYINS"
     CDS             complement(4567..7338)
                     /codon_start=1
                     /product="Exodeoxyribonuclease VIII (EC 3.1.11.-)"
                     /label=Exodeoxyribonuclease VIII
                     /db_xref="SEED:fig|6666666.356834.peg.7"
                     /translation="MNTYAFLIKAKAKSEKKSLFCWLSAKSDSRADREIMNVLEDEEIA
                     TGRGGDYNLPIRTDWFVVDDLPEEGVLDDTWCDRYELNDDGQSWRKIPASEPASTNIHD
                     DHASFAAQTTSTQSADAPATDGTITIDQASFVQKVLGSWLFGSFTKLFAGQQSDISTLQ
                     HDMDATYVQNLLLALNNAKELLQAQHCFPETLFGLIDSIKSVWVPDGKAPSVGDIVSFS
                     KEWLNARNEDSTLERSGPYRSEVTTKWAKKSGVQRTESGVIAGGDNKTDRSPDYTHTLD
                     TLDVEIALATLPMDFDIYEIPVSLHRRAKEIIANKEEPFKTWSKHLRNAPAVLNYSRAA
                     IFALIRSCHFAEDVEEKPESLLPYINANLVESDHANPSQHQLIQARHLPALSEKGNTSS
                     PEPEIKNVGNGMFAIDGLMGNTPSIEGEKPENDGVGNVQMEAAGNKSIEAGAAVPTPEN
                     DDGSIEEARTALESAVSKWVGGGALPEEPAEPTVTDEPPYFEPGRYEGVSNNDYHAANG
                     VSSTQVKDARVSLMYFNARHVAKTIARENSKVLDMGNLVHALALQPENLLAEFSVEPET
                     PVGAFTTTATIRAFIDKYNGTLPAPLSADDIKALLDEYNATLTPQVALGASLEETGQSY
                     MALPAEFQRIEDGQKQTASAMKACIKEYNATLTPQVKTSGSRDALLEQLALINPDLVAQ
                     EAQKPAQLKVSGTKSDLIQSVKSVNPDAVFADELLDAWRENPEEKILVTRAQLATAQAI
                     QKSLLNHPTAGKLLTHPSRAVEVSYFGFDDETGLEVRVRPDLEIDLDGVRIGCDLKTIS
                     MWNVKQDGLRAKLHREIIDRDYHLSAAMYSETAALDQFFWIFVNKDENYHWIAIVEASE
                     ELLELGMLEYRKAMRAIATGFDTGEWPAPITDDYADELNDFDQRRLEALRMA"
     CDS             complement(7548..7742)
                     /codon_start=1
                     /product="hypothetical protein"
                     /label=hypothetical protein
                     /db_xref="SEED:fig|6666666.356834.peg.8"
                     /translation="METLFALVLVICTTAGDCHEAVLGVYDTKQDCVADMYDQRVHGEC
                     WPVEGIIRADDQKPAVKQK"
     CDS             complement(7742..7864)
                     /codon_start=1
                     /product="hypothetical protein"
                     /label=hypothetical protein
                     /db_xref="SEED:fig|6666666.356834.peg.9"
                     /translation="MNIRQFRRAQRLAQKARAQNDSKKWDAANRIMARATGRGN"
     CDS             complement(8318..8731)
                     /codon_start=1
                     /product="hypothetical protein"
                     /label=hypothetical protein
                     /db_xref="SEED:fig|6666666.356834.peg.10"
                     /translation="MTAACFPGYDFYQSGPERFTLPDGTLENRDGNIMYVADRVFDIDT
                     LEEVDMTINTDRPLTIGWAIGLCAATVVSVILCAGGIYAFLQSDLNNVRSEISSLRTDA
                     RDDVKSTNAQINEVNKTLTSIQVDVATLKATKN"
     CDS             complement(8728..9060)
                     /codon_start=1
                     /product="hypothetical protein"
                     /label=hypothetical protein
                     /db_xref="SEED:fig|6666666.356834.peg.11"
                     /translation="MSEQNNSEKNNKIGDPAIAKKVTIPMLKKYFDNLEKERGKEVECT
                     ICAGTQWIVPTSPEGDDKPIIITLPMPFHGQMGVWAFPISCKKCSNMLLLEASIVTKSL
                     IRDGEI"
     CDS             complement(9105..9494)
                     /codon_start=1
                     /product="prophage LambdaSo, transcriptional regulator, 
                     Cro/CI family"
                     /label=prophage LambdaSo, transcriptional regulator, C
                     /db_xref="SEED:fig|6666666.356834.peg.12"
                     /translation="MKTMSEVIGERLKDLRTKKNLSQAQLSKLCGWATASRVGNYELGT
                     RSIGADDAVVLARVLGTTPSELLFGEPGDSSQWLTEQQRKMLELFNQLPEAERERMIDL
                     FQLRLKELDEYVEKYLRGRYKPVGE"
     CDS             9604..9831
                     /codon_start=1
                     /product="Cro repressor-like protein"
                     /label=Cro repressor-like protein
                     /db_xref="SEED:fig|6666666.356834.peg.13"
                     /translation="MNNISIERQKLGLSQTQFAKVLGWGRSRLSNYEASLRDPGLIECR
                     VIVEALNKLGGDCTLDSVFPPKPTKTTERK"
     CDS             9834..10397
                     /codon_start=1
                     /product="hypothetical protein"
                     /label=hypothetical protein
                     /db_xref="SEED:fig|6666666.356834.peg.14"
                     /translation="MHTQTYQDDNYAKSGLLKSRNQSRQSVSAHAAVRDAVEAWQKTLP
                     GRAQEAIAQLVVDEWRRRGGRGLQLGDSARNNKQNLFRWLDNPFNSRRYAGYIEQLAPV
                     IADVMPIEIARQYGLKKGKTKAELVAAASRECSEAKQAALLGEPLRELEQKIKEGVMSL
                     IQLAPPDRWAAVLDSTVTMFNGIF"
     CDS             10412..10651
                     /codon_start=1
                     /product="hypothetical protein"
                     /label=hypothetical protein
                     /db_xref="SEED:fig|6666666.356834.peg.15"
                     /translation="MNHLEFIEKHVREDLLKKGYTPGIAQGGVAKALEYYRRVSQASSK
                     GRMIDDCLREGRLWAEKYSSEKPKKAKPATLCGR"
     CDS             10693..11325
                     /codon_start=1
                     /product="Phage-related protein"
                     /label=Phage-related protein
                     /db_xref="SEED:fig|6666666.356834.peg.16"
                     /translation="MKERGIIFNGDMVRATLDGLKTQTRRVVANVSPDNCLVLRKPTKT
                     KNGVYTHVLDAPQHDLCPFGKVGDRLWVRETSGLQIRRDALGGTGEFRVYRASNPDAIR
                     YKTASGEIAPIKWIPSIHMPRYASRILLEITDVRVERLNDISEEDAIAEGLERYNDDGI
                     VYYGPYDHGDCRPEVAFGDLWKSIYGAESWDVNPWVWAITFRRIEGD"
     CDS             11325..12302
                     /codon_start=1
                     /product="Primosomal protein I"
                     /label=Primosomal protein I
                     /db_xref="SEED:fig|6666666.356834.peg.17"
                     /translation="MAALPYMQLYIADYLADTMHLSTEEHGAYLLLMFNYWQTGKPIPK
                     NRLAKIARMGNDRWISVESSLKEFFNDNGAEWVHERIERDLDAVRMSLEQKSAAGKASA
                     EARRVKKGTNYQRGGNARSTGVKNPLEHGGNGNPTNKDPDNKEDLKDKTPHIAPEGNLP
                     PAENNGLPEYIQGIDEPIGKFPMFSDWRPSLDFRQRAALAGVVLTEDYQPTELAGFVMY
                     WQPEGKAFHQHQWDQKLARHIQQVRGAAGKQKTGGSNAATEQTTSSGESRAMQKFRAAQ
                     SQRHGTDAGRVVGGDDRDLHGSLDYQERGGTFSSVGGGDWTSDE"
     CDS             complement(12370..12525)
                     /codon_start=1
                     /product="hypothetical protein"
                     /label=hypothetical protein
                     /db_xref="SEED:fig|6666666.356834.peg.18"
                     /translation="MIKHRLAPREFRATRIAIRLVAPALVFGHNVIGVQAKWIRSALSD
                     QRNKIG"
     CDS             12538..12753
                     /codon_start=1
                     /product="Replication protein P"
                     /label=Replication protein P
                     /db_xref="SEED:fig|6666666.356834.peg.19"
                     /translation="MRRTGVEKRMTAGELERLAERLLNKWVKHVAHGMSIPPVRRQLAA
                     PKHPGGPTPAELAYAEFKRRKAAGLI"
     CDS             12775..13044
                     /codon_start=1
                     /product="hypothetical protein"
                     /label=hypothetical protein
                     /db_xref="SEED:fig|6666666.356834.peg.20"
                     /translation="MKTKMPVSQRMLRHIRCHEGMTRQEIARALNITSKEAGSTLNTLR
                     ENQRIVAVGTPGKYTYFLFRETQPAFGVHPVQARFTQLLAVVRT"
     CDS             complement(13106..14185)
                     /codon_start=1
                     /product="5-methylcytosine-specific restriction related 
                     enzyme"
                     /label=5-methylcytosine-specific restriction related e
                     /db_xref="SEED:fig|6666666.356834.peg.21"
                     /translation="MQFLKDVFEDYKELTKHNNGIINKSYFLKNHKSANSIFNVIPEEL
                     KKFLSNKKDDFEIKASIGQTRVTDIPWICIMNKNITKTPQSGYYIALLFSYDMQECYLS
                     LNQGATEAKNVCGGEKKSLPFLSMISESVSSYLTYDKNAICGEIDLKARDFPGTGYEKA
                     AIQSFRYKKGALPSVQEFRANLDVLLLSYDNLFRLFSKSLYTSSEELFDLFAQGLASLG
                     EDSNDEEDSENKKAKDKITGSLNLYPRDIKVASSAIKKAKFLCEYDYSHKHFKSKISNN
                     NYVEAHHFIPLSLQGKFEYSLDIVENVISLCPICHKILHHGTIDNKRPIIEKIFNERVN
                     LLKNRGIEITLAELMKFYS"
     CDS             14455..14853
                     /codon_start=1
                     /product="hypothetical protein"
                     /label=hypothetical protein
                     /db_xref="SEED:fig|6666666.356834.peg.22"
                     /translation="MKTKIGLFLSFALLYSSASSADGGDFIFRVNDESYSFPADCVESL
                     EFHDKEEGYPERIDMRLTDECGRRVSDLTTQNIGKQMTIYYEHNQLMSATIASRLRSNI
                     MLPTTKTPRVVLMQVLVDYGVNARSVGR"
     CDS             15003..15224
                     /codon_start=1
                     /product="hypothetical protein"
                     /label=hypothetical protein
                     /db_xref="SEED:fig|6666666.356834.peg.23"
                     /translation="MAIKLPGSGYAVVRCRDHVVVATFKDFPEFDRALTYRQGDTISFM
                     PLQPEEIVGTPTLFTQMLERAGYRVSQV"
     CDS             complement(15221..15421)
                     /codon_start=1
                     /product="hypothetical protein"
                     /label=hypothetical protein
                     /db_xref="SEED:fig|6666666.356834.peg.24"
                     /translation="MRAFLKSAQITEPTLSRFRYSRVSGADGTSIPPDDITSDNCAIGL
                     SPVTQQAMVVQAISGNYMTKF"
     CDS             15450..15887
                     /codon_start=1
                     /product="Phage protein"
                     /label=Phage protein
                     /db_xref="SEED:fig|6666666.356834.peg.25"
                     /translation="MLGLGYDYWEPVGGTISPAEREFVRGYVRFLANQIGVEDALNTVA
                     DAYFDEVSQQRVVNISATKSFDAFRRWVTVEAGHYDAFIMPDGSIQKEARSVSFAKMDD
                     LEFNDLYKSTLDVLWNFVLRRNFPSQQSAENAAYQLLGYAA"
     CDS             15884..16468
                     /codon_start=1
                     /product="Phage NinG rap recombination"
                     /label=Phage NinG rap recombination
                     /db_xref="SEED:fig|6666666.356834.peg.26"
                     /translation="MKKPLRRKCKICGDKFTPQFDNIRWCCPEHGAQYAMQLREKERQR
                     QQQKKQKADQAAWRERKAAVKPLSHWIGMTQRAVNDWRREYLLAAGDCCISCGTREAFV
                     WHAGHYRTTAAASHLRFEPDNLWLQCHTCNVHKSGNIEAYRISLVERIGEVRVQELEND
                     NQQHRWTREELNKIRATARANLRELKKQEAA"
     CDS             16465..16605
                     /codon_start=1
                     /product="hypothetical protein"
                     /label=hypothetical protein
                     /db_xref="SEED:fig|6666666.356834.peg.27"
                     /translation="MSREVIERIRDRWQKLRLFRARGTVLVDYRILKNFVRIYQTLGEK
                     A"
     CDS             16602..17291
                     /codon_start=1
                     /product="Phage anti-termination"
                     /label=Phage anti-termination
                     /db_xref="SEED:fig|6666666.356834.peg.28"
                     /translation="MNIQYLQYVRQQLIVATADLSGATKGQLVAFAENAQFAATARSRE
                     RKKVADPVTGRMVNPSSPPIPGQQSRAKGSAIALVLPVEYSTSSWRRALLSLEEHQKAW
                     ILWNYSDNIRWEHQETITRWAWEQFSEKLAGVRIAKKTVDRLRQLIWLAAQEVNAELSG
                     RDAYEYQVLAELVGVAKSTWTETYLPHWLAMRSSFVKLDSDALISVTRIRSQQKATNLD
                     ASLAKPN"
     CDS             17528..18118
                     /codon_start=1
                     /product="hypothetical protein"
                     /label=hypothetical protein
                     /db_xref="SEED:fig|6666666.356834.peg.29"
                     /translation="MSKKITFTSIMTAIGTVASVLACIYAIKAYESSKTPTFPLDDAYT
                     DSIEISSLTKNAHRFEEFLGSHVGRVVYLNVYFDPDSGYVDVDKEPELSPEEYESYDKE
                     TKKEIDEHNEAFDQSSLTIWTECYEGYNKKLRPGVDNYCTGITISFLKNPNSYSSLDWF
                     RGAYYLKGFFQVVHYSGPYQGFMVATLRGESAR"
     CDS             18320..19177
                     /codon_start=1
                     /product="DNA/RNA endonuclease G"
                     /label=DNA/RNA endonuclease G
                     /db_xref="SEED:fig|6666666.356834.peg.30"
                     /translation="MKMNFIKLLPVLLLGACSTYQPQETAEQQPHQQTVTPEPARQAAV
                     AAVAAVSKDNCLVGCPTGGSSQTLIRDAYTLNNNSSTKFANWVAYKMTSSSQASGRSRT
                     WRQDPDLPASDTLAPAAYTGANAALAVDRGHQAPLAGLGGSSDWQSLNYLSNITPQKAD
                     LNQGAWVRLEDKERALSNSKTVYTVTGPLFEKNIATLPNAPAVQIPSGYWKILFTGSSP
                     ADGKFAAFIMNQDTPRAANFCNFQVTVSQIEQKTGLTIWSALPANVASTIKAQKGSLGS
                     DLGC"
     CDS             19286..19681
                     /codon_start=1
                     /product="Phage holin; Phage membrane protein STY1040"
                     /label=Phage holin
                     /db_xref="SEED:fig|6666666.356834.peg.31"
                     /translation="MSEPFTSTGAAGSALAGASLYGILTGTDYGVVFGAFAGAVFYVVT
                     AAELTAFRRIAYFVVSYIAGVLCAGLVGSKLSALTGYSDKPLDALGAVIVSALAIKILT
                     WFNNQDMDGVLNALSRFRGGGGNGSSR"
     CDS             19665..19928
                     /codon_start=1
                     /product="putative prophage membrane protein"
                     /label=putative prophage membrane protein
                     /db_xref="SEED:fig|6666666.356834.peg.32"
                     /translation="MAALVNVIICAVIVVLLMFYRKNGARHRPLISWLAYLLVLVYASV
                     PFRYLFGYYDASWLVVIANMFICAAILRARGNVARLIDVLRF"
     CDS             19928..20470
                     /codon_start=1
                     /product="hypothetical protein"
                     /label=hypothetical protein
                     /db_xref="SEED:fig|6666666.356834.peg.33"
                     /translation="MTKDEIFNAILNREGGYVNHPADRGGPTNWGVTEKVARAHGYNGD
                     MRNLTRQQALEIYEADYWYGPRFDQVAAVSPVIAAELCDTGINMGPSVPSKWFQRWLTA
                     MNDGGRLYPDLIADGNIGPRTITALRQYLAARGGEAERVLLRALNCSQGARYLELAEQR
                     PANEAFLYGWVRERVQL"
     CDS             20467..21000
                     /codon_start=1
                     /product="hypothetical protein"
                     /label=hypothetical protein
                     /db_xref="SEED:fig|6666666.356834.peg.34"
                     /translation="MSILSSWKIATGTLVAGIAIGWYVQGLRWDADAAETGRQHSDDIR
                     AGQQAIIARQSFDFQRYNEIARNANQYAINIKGQSDEKQVIYRTIIKRDPVSGKCVPDD
                     VANRLLDYTYRLRASAMHTVASGVDTAGSGAAASGCRLTYGQAVYWIDPLLTTLDKALN
                     QLAGIREAELDRAR"
     CDS             21024..21536
                     /codon_start=1
                     /product="hypothetical protein"
                     /label=hypothetical protein
                     /db_xref="SEED:fig|6666666.356834.peg.35"
                     /translation="MLIRLNHLEKGMHVTYQDIQQQYLLTKKRHGERRAKLHQDAYSLV
                     AEYKDSLALKSDTWRNSQADDNPYVTTGILSKGEYQRKPISSFDIDESLSLKFVIATVI
                     DDSIMGGSYYLIDISMRYENGLLIVDIGAGKEEIIVADPGKDGGYYAVCSCIKQLVLSG
                     LIDHRLE"
     CDS             21996..23027
                     /codon_start=1
                     /product="Phage terminase, small subunit"
                     /label=Phage terminase, small subunit
                     /db_xref="SEED:fig|6666666.356834.peg.36"
                     /translation="MKKTDWESIKRDYAAGQLSIRAIAELHGVSDTAIRKSAKKEGWTK
                     PEKVRKTGSQKTTSANQNANPRTKQKNQIPQIENQIDSNCPSIEKSNDDWTLNPDEYGL
                     NDMQARFVNAYLISMDKTAAYKKAGYSGEGNTAIAAACRLYRNVKVARAIRDALDARER
                     RTQITQDDVLKMWWEIATADANQITELRRLCCRHCWGFGFQYQWQDAVEFEEASDRAKQ
                     ANKPEPKDNGGYGFDAQLDPNPECPRCNGMGVSRSHFHDTRDLRGAARRLYAGVKEGKF
                     GLEVITRNQDEALKMVAQHLGMLKNRTELTGADGGPINQVNYTPEDYAKAQAALENQLP
                     DLD"
     CDS             23261..23884
                     /codon_start=1
                     /product="Phage terminase, large subunit"
                     /label=Phage terminase, large subunit
                     /db_xref="SEED:fig|6666666.356834.peg.37"
                     /translation="MSQLIEWENLNFPDRVALKSKSEKSFLNFTRIWFEMLQGDRLLVN
                     WHHKMMASQIDDLVAGRLQPRNLIINVPPGGTKTEFVSVHLPAYINMLVQTEKLRKFRN
                     LNISFADTLVKRNSRRTRDIIASPEYQSLWPCQFGVNQAEEWEVVNGRGRTVGQTVSRS
                     SGGQITGGALVIPAPIFPASFVSMTTTNRKTCFPVPSVITPIAC"
     CDS             23842..24900
                     /codon_start=1
                     /product="Phage-related protein"
                     /label=Phage-related protein
                     /db_xref="SEED:fig|6666666.356834.peg.38"
                     /translation="MFSGTKRDNANRLLVNTIRSRRGDKSKDHPTPFVSIQQRLHTDDS
                     TGFMLAGGMGMDFHHVTIPALVSEEYIDSLPEPWRSLCWFSVKKTESVVVGGVRYWSYW
                     PVNEYVGDLMRLWERDEYTFLSQYMQRPRALTGGLIDTDWFKRYTHLPQLTHRAVYVDT
                     NSGKVEDFNDYTVFTLVGVGIDGNLYIIDSVRGKWDPEDLLKTAIELWEKWRPFDRKRP
                     APLRHMGIEDKQAGQGLITTLKKRKSLPVLEIPRGAGQNKLIRCLNTVPQIKTGTVFIP
                     ALITDDGQRVDQVYYADGTVAARTDWVMPALAECADFSADDSHKNDDILDTFMDAIEIE
                     LISGASAGWGWV"
     CDS             24903..26294
                     /codon_start=1
                     /product="Phage protein"
                     /label=Phage protein
                     /db_xref="SEED:fig|6666666.356834.peg.39"
                     /translation="MTDNKYGGKPRIRVSNDGLANMMTGMGTERDRRTFNRFMFNMLQD
                     FAELEAAYIDNWIARDIIDIPVDDSTREWREFASDDATAIREAEKLYNVQSVTQDAFKW
                     AGVYGGAGVLMITDQPFNRPLRVKKIKQGSLKRLLVLDRMFINGQAFNVTNPLAENYML
                     PDYFVVNGGSQQIHYSHFVKAPGAQLPMRLRMINGGWDDSRLRRCLEDVKDAVSAKGGV
                     AALIQEANIDVINRENLANDLAAGDMDDVIAQRYNIFGMMKSLYRLALLDKNEEFDRKQ
                     ISFGGLGEILSVLMEWTAGAAGIPMTRLFGVQAKGLGDSGQGDMNNYYNTIRGGQESKY
                     RPFLKRIDEVLIRSTLGTMPDGLDFEFAPLSQPTDTELSAQRLADAQADELRLQQGVVR
                     KSQVARKLMEQGVYGLKESDITELESDEKAERDGDYEFRLAEFAGTDGKNANTPPSANP
                     ANQAE"
     CDS             26344..27093
                     /codon_start=1
                     /product="some similarities to plasmid-related proteins"
                     /label=some similarities to plasmid-related proteins
                     /db_xref="SEED:fig|6666666.356834.peg.40"
                     /translation="MAQAVDEALVPVLHRNYTADSYLTDILKEAIRQASERFMNTAFQR
                     NAERLSQRVVSRAESDSSEAFVEQINRAIGIDMTALMVNENLVDYVDASIESNVALIKS
                     LSSDYFEDVQMQVFDGILRGDSLTTIVRNLQHSTGTAYNRAHLIARDQTAKIQADITSA
                     RQQNAGIDRFRWSTSQDVRVSGNPAGKYPLAKISCFAISRIDIGMGAGVYLWSRGAKYN
                     GQTDLFPGRAHIGCRCHAIPQIKGLDY"
     CDS             27103..28287
                     /codon_start=1
                     /product="Phage protein"
                     /label=Phage protein
                     /db_xref="SEED:fig|6666666.356834.peg.41"
                     /translation="MRITIRDRVAFPVPSQREITPEGYLKVPGRVARVGIQQYLASELG
                     LTDRPPGQIVNVYRPPEEVFKSSSLASYDNMDITIDHPDDLVDSTTFKEVTAGHAISPG
                     RQDGDYVVVDLLIKDQQAINEIDAGKAELSAGYTSEYDETPGTAPDGTPYEFIQRDIKI
                     NHIALCDQARAGRKARLFDAKPTGEHPMPFIVVLDSGTRVTVAEEATSQLIQTSFDSLK
                     RRVTDAEEEKEKAEAAKDQAEEELEKEKAKSDAKDEEIEKLKEKTSEDSISKLIAEVVS
                     VRDSAAKIAGEGFSCDSLDPMKIRRAALDFMGIKCKQGSWDKASDAYTLAYFDAEEERK
                     ESEDEEEEENKISNDSLNAFTRDMKRVKTGGAQATRDGVRQSWLDKRYGTQEGK"
     CDS             28290..28802
                     /codon_start=1
                     /product="hypothetical protein"
                     /label=hypothetical protein
                     /db_xref="SEED:fig|6666666.356834.peg.42"
                     /translation="MAIAQDSFSLFRGQAYEGQISTTDVVEVVSRKVETELVQFGRAVI
                     RGIEKRSCAPVGATTTAADIIGFSVRSMATSSPTPPTNPANYITGYAVDSVASVLRRGG
                     MFALCVDGADAGEAVSIILTVGENQGRLTTGSGAGLLALNQVKWIEDVAAGEVGEIRVD
                     GILNVSA"
     CDS             28818..29753
                     /codon_start=1
                     /product="phage-related protein"
                     /label=phage-related protein
                     /db_xref="SEED:fig|6666666.356834.peg.43"
                     /translation="MPKSVFDVSPVSALSFLVNQAAHIEAEIYRIEYPQFKYGTLLPLD
                     NSAPDWAEAVMFRSIDSRGELQLFGPNSTDVPTVDIAMSQGLKNIDTAALGYTYSIQEI
                     GFAMLNNVNLDAERGQAVRDVVEQGLNKIYLLGDKGVGEGLYTSPNVSVEAAASTLVAL
                     VAAIPTNGTQPIIDFFGNAYNTVYLDNTLTVHRPNTFVLPPAQFQLLARTLLSTQNASN
                     VTLLQFLRTNFPDITFEDDILLKGAGVAGADRMAVYKKEIRVVKGHDVMPLRFLAPATA
                     DNVNFKVPAILRTGGTEWRIPKAGHYVDGV"
     CDS             29755..30270
                     /codon_start=1
                     /product="hypothetical protein"
                     /label=hypothetical protein
                     /db_xref="SEED:fig|6666666.356834.peg.44"
                     /translation="MAELFNKHTAPVTVTDAVTGQRITIPCGHSALVSGDFRNHLFVKS
                     GMILAEHDDDDKPVVTTITTSGVSVEELQKTIDALRAQIDAGAGGAGGAGGAGGAGGAG
                     GAGGAGGAGDGDDSLDKDALREQYEELFGKKAASAASAETLKKAIDERLAQSGDSAGGA
                     GDGTNENE"
     CDS             30312..30722
                     /codon_start=1
                     /product="Phage protein"
                     /label=Phage protein
                     /db_xref="SEED:fig|6666666.356834.peg.45"
                     /translation="MEITAQIVVDFRAYYPEFSDETTWPDSGVITALAEGDAETGKRWG
                     RYPNGQVVSIKKRGMFAFAAHRLVMRQRSAGGDVGAAYAISGKSVGDESTSFAVPSVTM
                     DDLTINGDLPLTAYGVEFMRLRRRAGTGGVMI"
     CDS             30719..31186
                     /codon_start=1
                     /product="Phage-related protein"
                     /label=Phage-related protein
                     /db_xref="SEED:fig|6666666.356834.peg.46"
                     /translation="MKLNAEVRGGNKIAQKLQQIQDRVMAKRRVLVGLPAGSGNYEDGA
                     PIAVIGAVQEFGSADGRVPERSFLRVPIRQNQDNIKKAFRALTGAVARGEITAFQMLDQ
                     IGVRAAGFCQEAIEAGIQPANADSTIKAKGSSKPLINHGFLKGKITHVVED"
     CDS             31189..31611
                     /codon_start=1
                     /product="hypothetical protein"
                     /label=hypothetical protein
                     /db_xref="SEED:fig|6666666.356834.peg.47"
                     /translation="MFGNGLDMEGHVDSTFNSPIDGGVRIIRAGAGGYTGPGGRYEETT
                     PSETIPLTHVNVQPAKWKDMQMLMGMGGTANPQDARVVHINDGVNYLYPDDNGKFADLL
                     EFSDGQAVRKWRVMSCDNRPWRNFCRAVVERYRGAG"
     CDS             31611..32135
                     /codon_start=1
                     /product="hypothetical protein"
                     /label=hypothetical protein
                     /db_xref="SEED:fig|6666666.356834.peg.48"
                     /translation="MESISELYDVFQQLVSLTSGVETVILADQGRDAPTGLYATYKPIP
                     IRAYGWSQRRRELTPATEDTDPTLGQWQDLRETVATSMEFILSVNIINEGAESAIMRLH
                     NANFRQPVSEFLYRNEIAWRHVSTCRNLTGILQAGIQPRWQADIHMFIEHTVSYELLRA
                     AGFDIQLTNEG"
     CDS             32144..33298
                     /codon_start=1
                     /product="Phage-related protein"
                     /label=Phage-related protein
                     /db_xref="SEED:fig|6666666.356834.peg.49"
                     /translation="MAYPVDNIIPVNVLLTPAGLGYADFSSAIVFADAADLIAGVTFAV
                     DTFRDYGSVTDVAADFKTDSDIYRIATRYFANIPKPPAITVWMKNATDTLLEIINSAND
                     RIWRYHYFLKNADVTAAILPDLSDWSDAASHPLWFTFSADNIIDQNVTNDVISALKSKG
                     NRHVFAGYKSASSVTADASQAYAMVQLAAAFHKFRPAGINTAITGEYQVLPGVSGDDLA
                     ISAYNALKAKNAVFFTQIELAGATDNSRVINSKSMSSYGEFIDDVVNLDVLKNHMQVDG
                     YNYIANAGSKRSMTPRDYAGLLSAVSATCKRFFDNGVLGTGSYVDPDDGKTKVAQFGFV
                     LRSSPEDVLDMTSAQRKARVYPPTSLLVILARAGHVAEININVE"
     CDS             33304..33708
                     /codon_start=1
                     /product="Phage protein"
                     /label=Phage protein
                     /db_xref="SEED:fig|6666666.356834.peg.50"
                     /translation="MAMKRYGADGANLTLFGIPIDDFGDTDPPITIEDLEPRATLKRGI
                     GKTSVRLDSQTRPKRVTVNLIPGSDQVRQILAVEKTGVDATFTFFQTGTAETVMGFDGV
                     LVNRGSMTRGGKTSVSDEQFIFEFADSEET"
     CDS             33708..34106
                     /codon_start=1
                     /product="hypothetical protein"
                     /label=hypothetical protein
                     /db_xref="SEED:fig|6666666.356834.peg.51"
                     /translation="MGRRIEIEIDGVLYTGATPSAKDQLEMLQIATKNSVLPALGDNAS
                     DMGLAVALASMDALSLNRLKELCIKNGKMVRDADSIPVAENLFQDQIQNYLLLLGKALR
                     ENIGPFWKLSAGSENGASATATNETTAA"
     CDS             34157..34279
                     /codon_start=1
                     /product="hypothetical protein"
                     /label=hypothetical protein
                     /db_xref="SEED:fig|6666666.356834.peg.52"
                     /translation="MARWADMLDGTYTIDDVQIMHAVIEAAIDSVERARENQKN"
     CDS             complement(34257..34451)
                     /codon_start=1
                     /product="hypothetical protein"
                     /label=hypothetical protein
                     /db_xref="SEED:fig|6666666.356834.peg.53"
                     /translation="MSNNFDVDTVRQKPFNFSQLKIFDKKIPNFTIQILHYEISTVLQF
                     TLASFENVLVFAISFFDFL"
     CDS             34544..35176
                     /codon_start=1
                     /product="hypothetical protein"
                     /label=hypothetical protein
                     /db_xref="SEED:fig|6666666.356834.peg.54"
                     /translation="MNRSIANQVMPLNIPDAGFNAKLSVTEKNVEHTTAFLQKGVEDFS
                     LPGYTTPHGYRLLKSRSDDHYRLITDTAIPETVYAVRLEFMNHIVPARKTCTQIMVWRT
                     VQPQYYTAVNGLPRLFFQHFLENYSIVVSDSEQTADGRRFWETMIALAMQTKGCYVYVS
                     DGTKEERPLTFMTSWDDFYSTWTNFCWGDDKDCHPHRLLVISKEKLH"
     CDS             complement(35498..36334)
                     /codon_start=1
                     /product="Phage antirepressor protein"
                     /label=Phage antirepressor protein
                     /db_xref="SEED:fig|6666666.356834.peg.55"
                     /translation="MTTQISAENLSVVVHNNVPVVTTDLLAQLYGTTAHSITKNHRSNT
                     TRFVAGKHFFKIEGDELRLFKNRVTNGDSVKNDRVSLRDSVGSRARSLILWTERGAARH
                     AKMLETDQAWDVFEKLEDFYFSQREKRAEEPVRKTKQSTAKQLTPLRQTVERLITSGVG
                     NIYPDIWKLVHKRFDIENIQQLPPDQINEAISYLDALEGEYIQRGQQATKTAVAPVGSR
                     RVLLYLDANGSVTGSLPIAPDELVASWNTFAELARREGWIVARKEDFAAKLSNLFI"
     CDS             36649..37383
                     /codon_start=1
                     /product="hypothetical protein"
                     /label=hypothetical protein
                     /db_xref="SEED:fig|6666666.356834.peg.56"
                     /translation="MSAPRPLPKTNELLRELFPSIEAGVNFLDEFTLRRIIREAQKLPD
                     ADQAYCVEGLARMISGDTDRGIELCEKAISINPYEKANWANYLRLLRSLFIYSKELVVM
                     RGVLEYLDSEMLSKLITYSVIWCNLDLLRSAINKAKEMGVEVDNKNAESIISLQERFPS
                     DMADIEKLAGLVMEIAEEEKILSSHSTVTEDVHGYLAYGFRVNTDDPNYLFSLNDRLAD
                     MIIDAGLATVDSVAFFEAGVDE"
     CDS             37383..37766
                     /codon_start=1
                     /product="hypothetical protein"
                     /label=hypothetical protein
                     /db_xref="SEED:fig|6666666.356834.peg.57"
                     /translation="MVNHNDFINLAESLLSSDDDIAIRTATSRAYYGMYHFAMNLVKNN
                     VPHYDSKKVRGGVHERLTYYLANEAAEKEDLDPVKLQKIAIKLKIAKRHRVVADYKLNL
                     YLSKTTAAETVIEAKMMAEIFND"
     CDS             37790..38254
                     /codon_start=1
                     /product="hypothetical protein"
                     /label=hypothetical protein
                     /db_xref="SEED:fig|6666666.356834.peg.58"
                     /translation="MKVLILLLAAFSFSVNAIASNYIGKNIITGSGNRFASGMVIAGAE
                     SVGKDRVKIYFIDYSHDLVTNEMKPDFFKIGLINHEETILNCKKKTYSSYSFGEIKNLD
                     NVSLSYHELGAPHKWGDYDFKDDGHLGVEFKKDQDSLSDLFGYMCDSALN"
     CDS             38438..40180
                     /codon_start=1
                     /product="Soluble lytic murein transglycosylase and related
                     regulatory proteins (some contain LysM/invasin domains)"
                     /label=Soluble lytic murein transglycosylase and relat
                     /db_xref="SEED:fig|6666666.356834.peg.59"
                     /translation="MAETIDELLVSLGLETDAKSFDQARAAFKGVTDNMLQMASALTAG
                     FGFDKLTRQFAGFISELDRFSRRNIIDPNNVLRWGYAFESMGGSVRDAMSAIEKLNTLR
                     DDAKEGRVNPMALRNAGINPYELAELSNPQSGLMWMSSQMQQLSNNPDALTKFTKALGL
                     NTTEQDVLSKGPDWLNQQFEEYNKRGRMITPETIRIADEYNTAMQNITTNLEGLGNAVS
                     VKLTPKLTALAERADKWLTDNKQGIVEKLDQAMPYLEQAAKGIAILVAINAAQKGGKMF
                     LSNLPILGAAAYAEYFYNDFDNIKDSASSSWDYNKRQLEKGLNENLNYPVGDALSSLGW
                     KNNPWRRPARVSSSNPNALDIPGNDPLNDIGYIKNYLTMNGVSDENERESLAAAFSRAS
                     SKHRVPINVLLGMAKQESGFNAGATGPMTEWGRARGIMQYLESTAGGLGIDPNNPEQAI
                     NAAAMQLRQRINRGESIEEAVAHHHAGPNRKLWGVKTADYVNRVGEHSEDVLAGYRSRP
                     EFSRASSAGVGGDTKINVTVDARGATDPSAIEEAARRGAIAGTRDGLAEAGRNLKLSQE
                     SDIQ"
     CDS             40431..40823
                     /codon_start=1
                     /product="hypothetical protein"
                     /label=hypothetical protein
                     /db_xref="SEED:fig|6666666.356834.peg.60"
                     /translation="MAAGAVGSLLGGGAAALAGIAASIGLSVTASGNKRSQEALDGMRW
                     SQRNSEILTVIDSAGTSYDNMIITSTRTQRNKENEGGLELVVEMRQLVLVNANRSAEVI
                     NANLPPNDTASTQGQATINRGEVSLQ"
     CDS             40820..41107
                     /codon_start=1
                     /product="hypothetical protein"
                     /label=hypothetical protein
                     /db_xref="SEED:fig|6666666.356834.peg.61"
                     /translation="MNIIPLINSAADQEFSAQLGNNNVSFHVRWLTRYGYFVVDMRDSA
                     GNPIALGRAMHVGVNLLAGLNTRIGKIVLEGETPTISNLGEKNSLVWYPS"
     CDS             41104..41994
                     /codon_start=1
                     /product="Phage protein"
                     /label=Phage protein
                     /db_xref="SEED:fig|6666666.356834.peg.62"
                     /translation="MSVIFGRSYKLIIKSSMGGKDLIYEPPMQIRFSVAGSPNNHESSA
                     NISMYGISRETRSRIYREYDQIFLYAGYKDNHGLIFRGQINNIETGKDGPSTYIRFYCW
                     SHFDRWRKASVNKSWGNNTPAIEIIRDVASVFQTDIDVIGDFSDLPPAIYGETRVGSAI
                     YEMNELKRVYDFDWFFESTRIVIFRNGRSRNFTHEVRAFNGMEGVPRIYLGEIEVDVKL
                     NHSIRILDWVDVYSEFETYGFSDVYRPGEGEASKKQRNIGKFAVLATMHQGDFYGDLWK
                     TTISANLRFDNGRVY"
     CDS             41994..42656
                     /codon_start=1
                     /product="Phage-related protein"
                     /label=Phage-related protein
                     /db_xref="SEED:fig|6666666.356834.peg.63"
                     /translation="MDSTKRENPLYEAIEAAKLATVSRLMVCLPGKIISYNPDNQRAQV
                     ECGIQRKNGDSFETLSIIENVPVNFPGTKEWIIFHELPADTEGVIHFSQRAIDTWLDQG
                     GPVAPHNMRMFSASDAFFSPGYRSLKTAIPNLPTSGMGMSNRDGSVRIHLTDGGIALTC
                     GGVSLTVSPEGITHSGKTTLDGRTEVTTGGLAVGDIEFTDHVHDGVDTGSGSTQGPR"
     CDS             42688..43143
                     /codon_start=1
                     /product="hypothetical protein"
                     /label=hypothetical protein
                     /db_xref="SEED:fig|6666666.356834.peg.64"
                     /translation="MKTYNCRKETSMALTYQDIRAKREQNEERRDRLINTVIKEAHELL
                     IEYVESLELGSATWADINGVNREYVEAGVMFGGEFKRYPLNSITLDDKYGARFAIATVI
                     DDTPRGGEIIPIGVYLYIRDGNVIVNIDNSNRPITVIQGENKYKKCL"
     CDS             43256..43606
                     /codon_start=1
                     /product="Phage protein"
                     /label=Phage protein
                     /db_xref="SEED:fig|6666666.356834.peg.65"
                     /translation="MIRNFIDGDIVTHGEHFATGKEATRQGIIRRLRLFLGEYFLNAAE
                     GTPWFQSILGKTQADIAAASIKQRILTAPGVIGLTRFEFNIDQTTRKITIYASLVDINN
                     EQFELLFDEEII"
     CDS             43606..43839
                     /codon_start=1
                     /product="hypothetical protein"
                     /label=hypothetical protein
                     /db_xref="SEED:fig|6666666.356834.peg.66"
                     /translation="MAEITKDGVNGQTLNSYLAVMRQRYLDVDDGWNINPESPDGLVIA
                     AWCETLANLDEAVISATTRQTRIQQSDSNSIA"
     CDS             43890..44246
                     /codon_start=1
                     /product="hypothetical protein"
                     /label=hypothetical protein
                     /db_xref="SEED:fig|6666666.356834.peg.67"
                     /translation="MTFTGTPLVEIPAGTLVRNRITGTLWATDSTVEHAAAARQQPTLH
                     AQPLAVRREIATTCRSLPHRSVVSPPLPTQTPHRSDVMRSQIMRFAFVAMNLLRFPAIT
                     SSIIFMRPWSIWRG"
     CDS             44243..44806
                     /codon_start=1
                     /product="Phage protein"
                     /label=Phage protein
                     /db_xref="SEED:fig|6666666.356834.peg.68"
                     /translation="MKQVRIYENTESAPDENGVEGHSLAIVIDGGEPADIVETIAKRKN
                     PGCGLNRYNNSIPNKISTDTVTPGGNPFNATFFRPEFIPIFVRVSISSDRRFDDDEIKR
                     SIIEYSNIGFEQTTGFAKTGFRIGEDVGAGRLFTPVNYIVAGSGFVHSIGVGISAMDAG
                     TSRVDIAFNQLGIFSVDNIEVAYV"
     CDS             44799..45707
                     /codon_start=1
                     /product="Phage-related protein"
                     /label=Phage-related protein
                     /db_xref="SEED:fig|6666666.356834.peg.69"
                     /translation="MYDHQKKALSRVYWQYKSSPKLIEWLKILPDIAQASIEEQADKIQ
                     RMLDIDTAEGEQLDICGRIVGYRTRPLGTFSPACQPAPVNDDLFRRMIRAKIFKNNSVA
                     TIDEIQFAADYIMNEPTRLLDGQDMEMRLIWFTHNVDIGTQKLIQDYDLIPRPQGVGTK
                     DVRVITYKPFGFGQHYSNFRAPFWHGDCIKIYTNLKLTLTFSDGVLSGALTAAPGIVVS
                     DIDVTLIYTLSGGATATEHLVTDDNGQFSTTPQFDEFTVVARAQVLTPLCEWENVQSGE
                     VVTNIFFNGTVTFNGRAKFRG"
     CDS             45710..48217
                     /codon_start=1
                     /product="hypothetical protein"
                     /label=hypothetical protein
                     /db_xref="SEED:fig|6666666.356834.peg.70"
                     /translation="MSDQIEIPNIDDLPDMPETAEFTPAVKLLTTETPVLGYDGTNINP
                     ANWQAKALADRTQWLRDRLLNLSTRLVLSVNGKTGNVVVTYNDVGADAAGTADALMTAH
                     LTALDPHSQYFDETRGDARYVQRSLANQSNGWLQLDASGKIPAAMLQTLASRYVVVTNQ
                     AERLALASSANLTICAQADIDQLFYLNGGDNPAVAANWVAGQAATVSGASSVYGRTGAV
                     AAQNGDYDADKITETATRKFASPTEKTAWNAKQPALVSGANIRSLFGQSLLGSGNLAPT
                     PAQMGAAAAVHTHTTADITDYTQKTQQLITASLEAGTGVTLGYNPINGKTIISAAGGSG
                     GSNNYIVVDRQSAGAGQLHTFNISTQSAFDLFAFALREESGSTNVTVLVDDFNASSESS
                     YDVTDAIIFDGQLHAYSGKIARLVRDDEFYSVPVRADGESVSVSIIRETIVPAMTSSNQ
                     AGYVASASSIFSSAFPAYIAFDQKNTIGGAGDVWAPAALPTISAPQWLRIDMPVAFSVG
                     GYSVKNRISGELASPRSWIFQGSNNGNVWDDIHSVTDDTNNVGGNVRSYELQSPAHYSS
                     YRLLITAANGGYNFVTISEFELYPAAKLLIKTSGNRWFSSNNGVLIETITPLSVDDFYS
                     NGFIFSGDISAAQLNEAFHVYSNSNVLVSIKYAPKKQIAIQKSLSSASSWSQINTATLT
                     ATQTGNGKVRVAVTRDLVNWHVLQNGAWVDVGALSADTAGATKLIEDGMTPAELNSITA
                     AQWAQLFSSNNGVPDSLAFAYALDIADSSADVATIDRLLLNVNNTSSWRLQNTSEVEIR
                     WRNDNVTFRNIAAGNYKLAYQIP"
     CDS             48227..48721
                     /codon_start=1
                     /product="hypothetical protein"
                     /label=hypothetical protein
                     /db_xref="SEED:fig|6666666.356834.peg.71"
                     /translation="MLRYWLRLDIMEYVSSGDDLTFLGYIEVPKKPEPHPEIYAWDINE
                     WGWVISEQLARESIALSRYERETSGITFNGNQFHTTDRSKTMLCGAAIKCLRDENKTFN
                     WKTIDGQFIELSSTDILELHDAVIDYVESCFSREQSLINYLLQNELTAEMIDEGWPSNN
                     L"
     CDS             48782..50758
                     /codon_start=1
                     /product="phage-related tail fiber protein"
                     /label=phage-related tail fiber protein
                     /db_xref="SEED:fig|6666666.356834.peg.72"
                     /translation="MDQKFFRVPFAQSGDRQTIPDATQSSGAVSFPSGWGVDYAKDPTV
                     DANAKPVEREAMNAILFAITNAVRQYQTFGFPEYITPADNNGGAFSYSSGAVIRYRAVA
                     DQPFKSYVSIADNNTSVPGSDETKWQEFIYREATTQEITEGTSGTTVVSPRRLKERTDI
                     IDDEIDDINDSLTRVGNLQVAQVNIDAQGSVVLNAPTDCVQILIIGHYTADGVESRDFW
                     ESKLSVNGVLVDTTPFYGFVTGSRGHGHHRRELLPFSQLVDMQLTAGDAINFEYTSNRG
                     GSSTTFTVFYIQGVSTDKPDVPSAIITSPSSSTINAGGQQQLAATVLPANVAADYPVTW
                     SVSDPALGSVDSNGLYTANSGVSGTQSVIASVSTGLASTATITQHIYLTSIDIGNAPPN
                     LIADRTYTVPITYSPSNYTESVQTSSSDSTIATLSIDGTLTISSGGTATLTLTGASSGV
                     TDSITITATEEVVPERYLQIDNNLSEIAAAGATDQAAARNNLGLGGLATKDGLTAADVG
                     AVPQAGASLGNDNLNTVTSPGRKFQSLTSNATLARNYPVALAGMLDVIRTTDAGIRQAY
                     YPYNNTDVYHRYCVDVGANPIVFGGWARLGGDFLEKSQDLADVVNKSDARENLGVGYTI
                     STAAPPASATGYGQGHIWYQVEE"
     CDS             50761..51330
                     /codon_start=1
                     /product="hypothetical protein"
                     /label=hypothetical protein
                     /db_xref="SEED:fig|6666666.356834.peg.73"
                     /translation="MPIFRESEGAFSPVKRLDINDFGVIKRVAAAWIVDDGVFKKLFPT
                     EPVDIADSDIFDADNSVKRWSGMTVSAQKYWMMEISIPVVDAAAFGQFTSSNIIVTRSG
                     NAQPVQLRADNITWITERPDGTVQNALSPPLNASTPIRIGWRNDARWITIPYNAGIVGS
                     VTNIRIEIVASGTLYFYDTSATLIAI"
     CDS             complement(51331..51498)
                     /codon_start=1
                     /product="hypothetical protein"
                     /label=hypothetical protein
                     /db_xref="SEED:fig|6666666.356834.peg.74"
                     /translation="MLTDCPVGSYAVIEDSGCYVAVRVGETDAPAIHIDPVPTLEDALD
                     IIAGRLSFFA"
     CDS             52130..52342
                     /codon_start=1
                     /product="Cold shock protein CspG"
                     /label=Cold shock protein CspG
                     /db_xref="SEED:fig|6666666.356834.peg.75"
                     /translation="MSNKMTGLVKWFDAGKGFGFITPDNGSKDVFVHFSAIQSNDFKTL
                     DEGQKVEFTIENGQKGPSAGNVVAL"
ORIGIN
        1 ctatttagac ttaggttcgt agggtaaacg agagaactgc agcgaccgct ggcggtaaaa
       61 catcacgcgt tcgcgaaaat agttacgcaa gtactcgggt tgttccctct caacgacctc
      121 tggtatgacc ggcatattgt aacgttcttt gaaggcaacg cctgacgccg ccaagtccac
      181 gttaatttta tccatatctt ctttggacaa ttctgccaga ttgtatccca taccatttac
      241 ccctgcctat tggccactga ctgatgcgtg tcacggtaaa gtagtggcag ggaaatggca
      301 agtcttcacc ttatcatgtg gatgtttatt attctcatta cgaaatggga atcattttta
      361 ataccaatgc ggcataaatg atatatctca cagttgttat ttctgataat aaaaatgatt
      421 cgcaataata tatttcccct aagggttaag tgataataaa tatcaataac attatttgta
      481 atttattgat ttaattgcgc tttttgttaa ttgattatca atgttaataa agtgtttttt
      541 attttgtttt ttcaggcata atgccctaaa taatttcacc tgccgggaaa atagggagtt
      601 agcatgttaa aaaaagaaat gattcagaag ctgaatgagc aacttaatct ggagttttat
      661 tccgcgaatt tgtatctgca aatgagcgca tggtgcggtg acaaaggttt tgaaggcgcg
      721 tccagtttcc tgaagacgca ttctcaggaa gaaatgcaac acatgcagcg cctgtttgac
      781 tatctggacg acaccggaag cttaccgata ttaggcgcga ttgctgcacc gccgattgat
      841 ttcgattcac tggcggatgt cttcaaactg acttatgaac acgaacagtt gattacagca
      901 aaaattaatg agctggcaca tgaggcaatg gtgctgcagg attactctac atttaacttc
      961 ctgcaatggt acgttgctga gcagcacgaa gaagagaaac tgttccgttc tattctggac
     1021 aaacttgcgt tagtcaaagc cagcgaaggc ggcctgttct tcatcgatca ggacctgaaa
     1081 aaaatgtctg cggcggcacc gtcagcctaa cgacaagcga cgcttttgtc ggccaatgat
     1141 tagttgaatg acgcgggata atgttttcct tatcccgcct ttttccctcc cgaatgcttc
     1201 ttctgccgtt actggctgcc aatattattc ctgaactcca cactcgactt caccttcctc
     1261 tgtcgctatg atcgcatcag tagtgatata caacattttg ttttataagg tttgaggctg
     1321 tctttctctg attcggataa ggctgcaaaa ctcacacaca tcattgtctg aatacgccat
     1381 gtcgggaata tcatgatgaa gaaatttttg ctatctatcg tgcttacctc actttccgtg
     1441 aatgcttttg ctgccgctaa actggcaaat atcagcaggt ttgaatacgg cgatcgctgg
     1501 gctttcacgc gtgaagaagt tcaactgatt tgccgtcctg gcaatgcgct gtacgcctta
     1561 catactggga cgttgatgca atatccgcta aacgatgttg ctattgtgca aatgaactct
     1621 ggacaggtga gtgcgcagcc gatagacgtc atctggcttg atgaccctaa gcaccccgga
     1681 cagaagaaaa gcctgcaacc atttatcgaa cgtgcagagc aactgtgcca gccaaacgct
     1741 aagccatgaa gtgattgttt tacttgttaa tgttaatcag ttacttcttt acggttaaaa
     1801 caaagtgtga aatctgttcc atttgtgata attgcgaacg ggttgatgct ggaaaacgcg
     1861 agggagttgg ctaagcttaa gtctacaggg ctagtacagc ttgtataaat gccaactttt
     1921 agcgcacggc tctcccaaga gccatttccc tagaccgaat acaggaatcg tattcggtct
     1981 tttttttacc tattgttttt taaggtttta ttttcattga ccacgaaaat gcacgaaaaa
     2041 tccacgaaat tcgatataca gccttttata aatagacgta atctttccct cgcgtatcca
     2101 gatatttctc tgtcatcttt gctgatttat gccccaataa cttctgagca aattcctttc
     2161 ctcgttcctt ctcatacaat ctgccagcca gacttcttat ttcatgaaac gtcggcggct
     2221 tctcatccaa ttcaatcccc gatgcctttc ttgctttaac aaaccccttt gttagcccgt
     2281 tgagttccac agccccgtta gggttatttt ttctaatacc aacactaatc atgtaatccg
     2341 ttttgctgga attacggcat tgctcaatga catcgcataa acgcagccct atggcgtcaa
     2401 ttgtcaggtc gagagggatc gccaatttgt ttccggtttt cccctgctcg acgagtagcc
     2461 gatcatcaac aatatcgctg aatttaatta cagcaacatc ctctctgcgc tgaccagtga
     2521 cgagtgctaa atccatcgcc aattgaaacc acagcgcctg ttttttagca gcgcagcgaa
     2581 tggctttata ctgttcaagc tccagcctct ctcgctttac gttcggctgg ggcgttcgcg
     2641 tgggcaacac tgggttatta tcgatgtgac cttcaacaat agcctcgcga aaaatatcag
     2701 acagaacaga tcgaaaaccc gcggccatag atagcttttc ttgttgtaaa taaatttcca
     2761 aaaactcagc gatatctttc gtggttattt cttttagtat tttccttccc agcgattgct
     2821 gaattgtagc gagttggcca gagcgtgttt tgtaggtatt agcggccaaa tctcggcgct
     2881 taataatcac atcgtaacgc tccagccact cagtcattgt gagttctttt tttaccttca
     2941 gtttttcaat aagagctaca ggggaaaaat tttgctcaat gaagctgttt gcttctatag
     3001 cctgactgac cgcatccctg cgcgcgatct gtccaagaga catttccttt cccgttaacg
     3061 gattcctcca ataaaacgat ttatatttct tccggtaggt gagattgcgc ggcaagttgg
     3121 cgtcatacct tgtcgtcctt gccattgatg attctcctca ctaaatctga attgaagcct
     3181 tttctttcgg caattatccg acgtgacagc ttgtaatctt ttgggttgat aaatacagca
     3241 tcttcgctaa ctcgatattc tcgaccatgc ttttctggtg ctgggtaaat tttcccagct
     3301 cgcgcccagc gttgtagcgt ctgtattttc ggcaggctgt cttttgaata atggcgttcg
     3361 caccattcat tcagcgtgat gagctttccc atattcgcct cataacgtta tgtatttaga
     3421 tttcacggaa tcagttttag cggggagggc gaacctcccc agactattta gctattgata
     3481 tactcgggct tcatatcgca cagcgttaca gcgaactgat catgcagttc gtcgccgagg
     3541 tgacgctttg ccgcagctag tgatttttcc agcgctgcaa acttctccac cgcgtcgggt
     3601 tcgtcaggct ggggtaggga attaacctcc gcctcaatct ggttttttgc attaacctgg
     3661 taatagcgct tcaccgcttt gtttttcagt tcggtgaata acgcagtgcc gagaactgat
     3721 tttttagttt caatatctgc gcgaatggcc ttagccttat caacgtcatc agcccttgct
     3781 atctgatcgc ggaaatcatc tgccagtgcg tcaatattgc tggtggactc ctgagcgcta
     3841 actattgcct ctggcgcgtc agtggcgacg atatccttca ggctaactgt ggctgttgct
     3901 ggcgtgacgt ccttctcgtt tcgttcttcg agctcatcag gtgtgtacac gcccagaatc
     3961 acatcagggc aataaagccg agaccagcgc ttaaccgcca gataggccaa ctgctggtat
     4021 gggtcatcag cccataatgt tgaattacgg acacgagcct gagcaagaaa caattcgagc
     4081 tcacgtggag tgtcctctcc tttcaaggtt gcccatatcc taatcccaac cccctcttca
     4141 tcggccattt cccagcctgg aactctgtat tcctgcccct ctttgttttt gcgaatggca
     4201 aagcggccaa tgatcttttc ccatggtcca aaccgtttat attcaaaacg atttgataaa
     4261 accccgctgc gcgagattac cgcgtttacc aattgcgctt cgtaacccag aacgccctta
     4321 attagatgtg ttttctgtgc gaccgcgaac gggttcattt gccattgcgc ggcctgcata
     4381 gccactgcca tacagtcagc ttgatttcct tgcaggtgag cggggaccgt cgcgttaccc
     4441 tgagccataa tctgagcgaa tgcgctaatt gcattcagat attgtgagtc aaatagtgca
     4501 acgtttgagt taactactgc gttttgctca ctcagtgata cgttagaatt tttcattatc
     4561 atccccttat gccatgcgca gcgcttcaag acggcgctga tcaaaatcgt tcagttcgtc
     4621 ggcgtaatca tcagtgattg gtgctggcca ctcacctgta tcaaatcctg tagcgatggc
     4681 gcgcatggct tttctgtatt cgagcatgcc caattccagc agttcttccg aggcctcgac
     4741 tattgcgatc cagtggtagt tctcgtcttt gtttacgaaa atccagaaaa actgatcgag
     4801 cgccgctgtt tcgctataca ttgccgcact caggtgataa tcgcggtcta tgatttcacg
     4861 gtgaagtttt gcccgcaggc catcctgctt gacgttccac atgctgattg ttttcagatc
     4921 acagccgatg cgcacaccgt caagatcgat ttcaaggtca ggccgcacac ggacttcgag
     4981 ccctgtttcg tcgtcaaatc cgaaataact cacttcaacg gcgcggctcg ggtgagtcag
     5041 caacttccca gcggtcgggt gattcagcag cgatttctga atagcttggg ctgtcgccag
     5101 ctgcgcgcgg gtgaccagta ttttttcttc tggattctcg cgccatgcgt cgagcagttc
     5161 gtcagcgaat accgcatctg gattaaccga tttaacggac tgaatcagat cggactttgt
     5221 gccagagact ttcagttgtg ctggtttctg tgcttcctgc gcgaccagat cgggattaat
     5281 aagcgccagt tgctccagca gcgcgtcgcg gctcccgctg gttttaacct gcggcgtcag
     5341 ggtggcgttg tactctttga tacaggcttt cattgcgcta gcagtctgct tctggccgtc
     5401 ttcaatgcgc tggaattcag caggaagcgc catgtagctt tgtccggttt cctccagcga
     5461 tgcgccgagc gctacctgcg gcgtcagggt ggcgttgtac tcgtccagta aggctttgat
     5521 atcatcagca gaaagcggcg ctggcagagt gccgttgtat ttgtcgataa acgctcgtat
     5581 cgtcgccgtt gttgtgaacg cgccaactgg agtctccggc tcaacgctga attcagccag
     5641 cagattttcg ggttgaagcg ccagcgcatg cactaagtta cccatatcga gcacttttga
     5701 gttctcacgc gcgatagttt tagctacgtg tcgtgcgttg aaatacatca gcgacacgcg
     5761 agcatcctta acttgagtgc tactgacgcc gttcgccgca tggtaatcgt tattcgacac
     5821 cccttcatag cgaccaggtt caaagtatgg cggttcgtcc gtgactgttg gctctgctgg
     5881 ttcctcaggt agagcaccgc caccaaccca cttacttaca gctgattcga gagctgttct
     5941 cgcttcttca atagagccat catcattctc tggcgtcggt accgctgcac cagcttcgat
     6001 cgatttgttg ccagccgctt ccatctgcac attgcccacc ccatcatttt ccggtttttc
     6061 tccctcaatt gagggggtat tacccattag cccatcaata gcgaacatgc cgttgccaac
     6121 gtttttgatt tccggctctg ggctagaggt atttcctttt tcactaaggg ctggtaaatg
     6181 gcgagcttgg attaactggt gctgcgatgg gtttgcatga tctgattcaa ccagatttgc
     6241 gttgatatac ggcagcaatg actccggttt ttcttccacg tcttcggcga agtgacagct
     6301 acgaattagc gcgaatattg ctgcgcgaga ataattcaaa accgcagggg cattcctcag
     6361 atgcttactc cacgttttga acggttcctc tttgtttgca atgatctctt tcgcgcggcg
     6421 atgtaacgac acagggattt catagatgtc gaaatccata ggcaaagttg ccagcgcaat
     6481 ttcaacatcg agcgtatcga gcgtgtgtgt ataatcggga ctgcgatccg ttttgttatc
     6541 accgcccgca ataactcccg actcagtgcg ctgcacaccg gattttttcg cccacttcgt
     6601 tgtaacttca gaacgatacg gacccgaacg ctcaagagta gaatcttcgt tacgtgcgtt
     6661 cagccattct ttcgagaatg aaacaatatc accgacagac ggggctttac cgtccggtac
     6721 ccatactgat ttgattgaat cgatcagacc gaaaagcgtt tcagggaagc agtgttgcgc
     6781 ctgcaacaac tctttagcgt tgttcaacgc cagcagcaga ttctgaacat aagtcgcgtc
     6841 catatcgtgt tgcagcgtag agatatcgct ctgctggcct gcaaacaatt tcgtgaacga
     6901 accgaacaac cagctgccca acactttctg aacgaatgag gcctggtcga tagtgattgt
     6961 gccgtcagtt gctggcgcat cagcggattg agtcgaagtg gtttgtgctg cgaaagatgc
     7021 gtgatcatca tgaatgttgg ttgatgctgg ttcagatgca gggattttgc gccacgactg
     7081 gccatcatca ttcagttcat aacgatcgca ccatgtgtca tccagcacgc cttcttctgg
     7141 caggtcgtca acgacgaacc agtctgtgcg gatcggcagg ttataatcac caccgcgacc
     7201 agttgcgatc tcttcgtctt ccagaacgtt catgatttca cgatctgcgc gtgagtctga
     7261 tttagcagag agccagcaga agaggctttt cttttctgat ttggcttttg ctttgattag
     7321 aaacgcatac gtattcattg cgttgggact ccttgaggtt gtagaatccc ctgagccagt
     7381 gattgcgccc tttggggagt ggttattggt caaaactcga ttccaacgct ctttggtcgg
     7441 agcgttggcg cactaacccg cttcggcggg tttttgcgtt tcaagctgcg agcagctttt
     7501 ccctgatgcc agcaatccgc cagctaatag caattggtca aaactcgtta cttctgtttc
     7561 acggcaggct tctgatcgtc agccctgata atcccttcaa ctggccagca ttcgccgtga
     7621 acgcgctggt cgtacatgtc agcgacacaa tcctgctttg tgtcgtaaac accgagtacg
     7681 gcttcgtgac aatcgccggc agtcgtgcag atgacgagaa ccagcgcgaa tagtgtttcc
     7741 atcaatttcc tcttcctgtt gcccttgcca tgatgcgatt tgctgcatcc cattttttac
     7801 tgtcgttttg cgctctcgcc ttttgtgcca gacgctgagc cctgcgaaat tgccgaatat
     7861 tcatcgacac ctctgccgtt atcgcccggc tggcggaacg ttgaaacctg ctgcgcgttt
     7921 gatatagagc gtttcgctgg tgcggtgggt gtcgagctgg tcaggctcaa cttttcgtta
     7981 gggaaaactc gacaaccttc acgaaaacct tactcaccac accgcgaaac gctctcaata
     8041 cttccagcaa ctgccgtcat gttctttcgc ctcaggctgg ctacttagct cgttcgcatc
     8101 actgagtaac tcgtggtatt gctcagtggg ttatgcgtta gagcgttgct gcgttgtgtg
     8161 aaatgatagt cacatatcgt gtctgatatg tcaaacacaa aatgtgtcac gctaatgcgc
     8221 acgaatgcgc tcggaaggga ggagttgatt tagtgtgaat ttcaggcaaa aaaaaatccc
     8281 gccggagcgg gattggtgag attaaatggg gtgaaaatta attttttgta gcctttaatg
     8341 ttgccacatc aacctgaata gaggttaacg tcttgtttac ttcattaatt tgagcgttcg
     8401 ttgatttaac atcatcgcga gcatcagttc tcaatgaaga aatttcgctt cttacattat
     8461 taaggtctga ctgtaaaaaa gcatagatgc cgccagcaca taaaatgaca ctcaccacag
     8521 tggccgcgca cagccctata gcccatccga tggtgagggg gcgatcagta tttatagtca
     8581 tatcaacctc ctctaaggtg tctatatcaa aaactctgtc agcaacatac ataatattgc
     8641 catccctgtt ttcaagtgta ccatcaggga gagtgaaacg ctcgggaccc gattgataaa
     8701 aatcataacc tggaaaacac gctgctgtca tatttcccca tccctgatta atgatttagt
     8761 aactatcgac gcctccaata acagcatgtt agagcatttt ttgcaggata ttgggaatgc
     8821 ccaaaccccc atctgaccat gaaatggcat gggaagtgtg attattattg gcttatcatc
     8881 accctccggt gaggtcggga caatccattg agtccctgcg catattgtgc actcaacctc
     8941 tttccctctt tccttctcta agttgtcgaa gtacttcttg agcattggta ttgttacttt
     9001 tttagcgatc gcaggatcgc caattttgtt gtttttttcg gagttatttt gctcagacat
     9061 aatgaaatcc tttcacccaa tgcaggtaat atttaaaagt aaaattattc gccaactggc
     9121 ttatatctac ccctaagata cttctccaca tattcatcca gttctttcaa tcggagctga
     9181 aagagatcga tcatacgttc gcgctcagcc tcgggaagct gattaaaaag ctcaagcatc
     9241 tttctttgct gctcagtcaa ccactgagac gagtcccctg gttcaccgaa cagcaattcg
     9301 gatggggttg tccctaatac tcttgccaaa acaacggcat catctgcgcc aatgcttctt
     9361 gtgcctagct cgtagttacc cacgcgtgaa gccgtagccc atccgcacaa ctttgagagt
     9421 tgcgcttggc ttaagttctt ctttgttcgg agatctttaa gtctctcgcc gatgacttct
     9481 gacattgttt tcatgcctca aattctacca cgaaacgtgg caatcaaagt attcacgtat
     9541 tgttattgac tgttagtcac gttttgtgtc taattctctt atccaatttg tgaggagaaa
     9601 acagtgaaca acatttctat cgagcggcag aagctcggcc tatctcaaac gcagttcgca
     9661 aaggtgcttg gttggggtcg ttctcgactt tccaactacg aagccagtct gcgcgatccc
     9721 ggattgattg aatgccgcgt aatcgtcgaa gcgcttaaca agctgggtgg cgattgcact
     9781 ctggatagtg tctttccacc taaaccaacc aaaaccacgg aacggaaata accatgcata
     9841 cgcaaactta tcaggatgat aactacgcca aatctggatt gctgaaatcc agaaatcaat
     9901 ctcgtcaatc tgtatctgct cacgctgctg ttcgtgatgc ggtggaagct tggcagaaaa
     9961 ctttgccggg aagggcgcag gaggcgatcg cgcagctggt ggtcgatgaa tggcgccgtc
    10021 gtggtgggcg cggtctgcaa cttggcgatt cagcgcggaa caataagcag aacctgtttc
    10081 gctggctgga taacccgttt aactcacgac gttatgcggg atatatcgag cagttagcac
    10141 cggttattgc cgacgtaatg ccgatcgaga ttgcgcgcca gtacgggttg aagaaaggga
    10201 agacaaaagc ggagctggtg gccgctgcgt cgcgcgaatg ctctgaagca aagcaggccg
    10261 cgctgctggg cgaaccgctg cgtgaacttg agcaaaagat aaaagagggg gtcatgtcgc
    10321 ttattcagtt ggcaccgccc gatcgctggg ctgctgttct ggacagtacc gtgacgatgt
    10381 tcaacgggat tttctaatcg agttttgacc aatgaaccac ttggaattta tcgaaaagca
    10441 cgttcgcgag gacttgctga aaaagggcta cacgcccggt attgctcagg ggggggtagc
    10501 caaggcgctg gagtattacc gccgcgtatc tcaggccagc agcaaaggcc ggatgattga
    10561 tgactgtctg cgagaagggc ggttatgggc ggaaaagtac agcagcgaaa aaccgaagaa
    10621 agcgaagcct gccacgctgt gcggcaggta acgagttttg accaataaac attactacca
    10681 aggaacccag cgatgaaaga gcgcgggata atttttaacg gcgacatggt tcgggcgact
    10741 ctcgacggtc tcaagacgca gacgcggcgg gttgtggcta atgtcagtcc tgataactgc
    10801 cttgttttgc gcaagccgac aaaaaccaaa aacggggtgt atacgcatgt tctggacgca
    10861 cctcagcatg acctttgccc attcgggaaa gttggcgatc ggctgtgggt gcgggaaacc
    10921 tcagggcttc aaattcgccg tgacgcatta ggcggtactg gtgaatttcg cgtgtatcgc
    10981 gccagcaatc ctgatgccat cagatataaa acagcaagcg gggaaattgc tccgatcaaa
    11041 tggattccat caattcatat gccgcgctat gcgtctcgca ttctgctgga aatcacagat
    11101 gtacgcgtgg agcggttgaa cgatatcagc gaagaggacg caatcgcgga agggctggag
    11161 cgctacaacg atgacggcat tgtttattac ggaccctatg accatggcga ttgccgacca
    11221 gaagttgcgt tcggtgattt atggaaatca atctatggcg ctgaaagttg ggacgtcaac
    11281 ccatgggtat gggccattac atttcgtcgt atcgaggggg attgatggcc gcgctgccct
    11341 atatgcaact ctacattgct gactatctgg cagacacaat gcatctgtct acagaggagc
    11401 atggggccta tttgctgctg atgtttaact actggcagac agggaaacca ataccaaaaa
    11461 accgactcgc aaagatagct cggatgggca acgaccgttg gatttccgtt gaaagttcgt
    11521 tgaaagaatt tttcaacgat aacggggccg aatgggtgca tgagcgcatt gagcgtgatt
    11581 tagatgcggt gcgcatgtcg ttagagcaga agtctgcggc aggaaaagcc tctgccgagg
    11641 caagaagggt taaaaaagga acgaattacc aacgtggggg taacgcgcgt tcaacgggtg
    11701 ttaaaaatcc gttggaacat ggtggtaacg gaaatccaac taataaagat ccagataata
    11761 aagaagatct aaaagataaa accccacaca tagcgcccga ggggaattta cctcctgctg
    11821 aaaacaacgg actgccggaa tacatacagg gcatcgatga accgatcggt aaattcccga
    11881 tgttttccga ttggagaccg tcgttagatt ttcgacaacg ggctgcgctg gctggggtgg
    11941 ttttgacaga ggactaccag ccaactgagt tagcggggtt tgtcatgtat tggcagcctg
    12001 aggggaaagc gttccaccaa catcaatggg atcagaaatt agctcggcac atccagcagg
    12061 tgcggggcgc ggcaggtaaa caaaaaaccg gaggttcaaa tgcagcaaca gaacagacca
    12121 ccagcagtgg tgaatctcgc gcaatgcaga aattcagggc agcccaatcc cagcgccacg
    12181 gaactgatgc tggacgggtt gtgggaggcg atgatcgaga tttacacgga tcgctggatt
    12241 accaagaacg gggcggaacc ttctccagcg tgggcggcgg cgattggaca tctgacgaat
    12301 gaccagattt ccaaagttat tagcggctgt ctgaatcgct gtgccgctgg caattcgtgg
    12361 ccacctgatt tagccgattt tatttcgctg gtcgctgagt gcggagcgaa tccatttggc
    12421 ctgaacaccg atgacgttat ggccgaatac aagcgctggc gcaacgagtc gtatcgctat
    12481 tcgagtagca cggaattccc gtggcgccag cctgtgcttt atcacatttg catcgaaatg
    12541 cggcgtactg gcgttgagaa acgcatgact gcgggagagt tggagcggct ggcagaacga
    12601 ctgctgaaca agtgggttaa gcacgtagca cacggaatga gtattccgcc cgttcgccga
    12661 caactagcag caccaaagca tccaggtggg ccaacacctg cggaactggc ttatgcggaa
    12721 tttaagcgcc gcaaagcggc cggactgatt taaccaacaa tcgagatttg accaatgaaa
    12781 actaaaatgc ccgtttcgca gcgcatgctg cgccacattc gctgccacga gggtatgacc
    12841 cgacaggaaa tcgctcgtgc actcaacatc acatcgaaag aagccggttc aacgctaaat
    12901 acgctgagag aaaatcagcg aatagtggca gttggtacgc caggaaaata cacctatttc
    12961 ctattccgtg aaacccaacc agcatttggc gttcaccccg tacaggctcg ctttactcaa
    13021 ctgctggcag tggtgcgcac gtgatttata aacatataat ccgatcactt tgtctaaatt
    13081 gccccctaaa gggggcatgt tgcttttatg aataaaattt catgagttca gcaagtgtta
    13141 tttctattcc tctatttttt aataagttga ctctttcgtt aaaaatcttc tctatgatgg
    13201 gccttttatt atcaatcgtc ccgtgatgta atattttatg gcagataggg cataaagata
    13261 ttacgttttc tacaatatct aatgaatatt caaattttcc ttgtaaagat aatggaataa
    13321 agtgatgtgc ttcaacatag ttgttattac taatttttga tttaaagtgt ttatggctat
    13381 agtcatattc acatagaaat tttgctttct taatggctga tgatgccact ttgatatctc
    13441 tggggtagag atttaaactt ccagttattt tatcttttgc ttttttattt tcactgtcct
    13501 cttcatcatt tgagtcttca cccaaagatg ccaaaccttg tgcaaacagg tcaaagagtt
    13561 cttccgaaga cgtgtataac gatttcgaaa ataatcgaaa caaattgtca tagcttagta
    13621 gcaatacatc caaattagct cggaactcct gtacggatgg taacgcccct tttttgtagc
    13681 gaaagctttg aatcgcggct ttctcatatc cagtacctgg aaaatcacga gccttgaggt
    13741 caatttcgcc acaaattgcg tttttatcat atgtaagata agaagaaaca ctttctgata
    13801 tcatgctaag aaatggaagt gatttttttt ctccaccaca tacattctta gcttctgtgg
    13861 ccccttgatt gagtgataga tagcattcct gcatgtcata agaaaatagc aaagctatgt
    13921 aatatccaga ctgaggtgtc ttagtgatat tcttattcat gatgcaaatc catgggatat
    13981 ctgtgactct agtctgcccg atggatgcct ttatttcgaa atcatctttt ttattagaaa
    14041 gaaatttttt taattcctca gggattacat taaatattga gtttgcgctt ttgtgatttt
    14101 ttaagaaata acttttatta attattccgt tgttgtgttt tgttaattct ttatagtctt
    14161 caaaaacatc ttttaaaaac tgcatgacat tctttccttt gtcttaataa gttttgtttt
    14221 taattaataa aattccaatg cgatgaacta ttataactat tgctaatctg ccactaaggg
    14281 ttataaaaat caattaaata gagtattttc caccttaaaa tatggcacag agtgctttgt
    14341 aatcgctaaa gcgcagtaca ttcgctgaag tgttgtgcgc tcgaatttgc cagagttgtg
    14401 cgcagcacat gagcaagcga cttgatatac tcccctttca acatggagga gataatgaaa
    14461 accaagatcg gattgttttt aagctttgca ctactttact cgtcagcatc cagtgctgac
    14521 ggtggtgatt ttattttccg agtgaatgat gaaagctaca gctttcccgc tgattgcgtg
    14581 gagtctttag aatttcatga caaagaagaa gggtacccag agcgcataga tatgagacta
    14641 actgacgagt gcggaagaag agtcagtgac ctgactaccc aaaatatcgg taaacagatg
    14701 acgatttatt acgaacacaa ccagttaatg agcgctacta tcgcatccag attaaggtcc
    14761 aacataatgc tcccaaccac taaaacccct agagtggtat tgatgcaagt cctggtcgac
    14821 tatggagtaa atgctaggtc ggttgggcgc tgatctaaaa cagtgggtaa tcgagcatac
    14881 aagattcgaa taaatacaaa aagaatacac tgagccccat tcattggggc tttttgttgc
    14941 atattgaaat attttatata atatcattac tgtatggata cacagttaat taaggtgatg
    15001 gattggcaat aaaactacca ggttcgggct atgcagttgt gcgctgccgt gaccatgtcg
    15061 ttgtagcgac gtttaaggat tttccagaat ttgaccgcgc actgacgtat cggcagggcg
    15121 atacgatttc atttatgccg ctccagccag aggaaattgt cggaacgccg acactattca
    15181 cgcaaatgtt agagcgtgcc ggatatcgag taagccaagt ttaaaacttt gtcatataat
    15241 tcccgctgat ggcctgaaca accatcgcct gctgcgtcac tggagataaa ccaatggcgc
    15301 aattatcact tgtaatatca tctggcggga tactcgtccc atcagcgcca gatactcgcg
    15361 aatacctgaa tcggcttaag gtcggttcgg ttatttgtgc tgactttaaa aaggcacgca
    15421 atcccgcttt tcatcgaaaa tacttctcct tgctcggcct tggttacgat tactgggaac
    15481 cggttggcgg taccatatcg cccgctgagc gcgagttcgt tcgcggatac gtcagatttc
    15541 ttgcgaacca aatcggggta gaggatgcgc tgaataccgt tgctgatgct tactttgacg
    15601 aggtatcaca gcagcgagtc gtcaatattt ccgctacaaa atcctttgat gcattccgtc
    15661 gctgggtgac cgttgaggct ggtcattatg atgcgttcat catgccagac ggcagcattc
    15721 aaaaagaggc ccgatcggtg tcgttcgcca aaatggacga tctggaattt aacgacctct
    15781 acaaatccac tctcgatgtt ctttggaact ttgttcttcg acgcaacttc ccatctcaac
    15841 aatctgcgga gaacgccgcg tatcagttgc tggggtatgc agcatgaaaa agccattgcg
    15901 tcgtaaatgc aaaatctgcg gtgataaatt cacacctcaa ttcgacaaca ttcgttggtg
    15961 ctgccctgag catggtgcgc agtacgcaat gcaactccgc gaaaaagaaa ggcagcgcca
    16021 gcagcagaaa aaacaaaaag cggatcaggc tgcatggcgt gaacgcaagg cggcggtaaa
    16081 gccactttca cattggattg gcatgacgca gcgtgccgtg aacgactggc ggcgcgaata
    16141 tctgctggcc gctggcgatt gctgcatatc ctgcggtaca cgcgaggcat tcgtctggca
    16201 tgccggacac tacaggacaa ccgcagccgc atcacatctg aggtttgagc ctgacaatct
    16261 ctggctacag tgccatacct gcaacgtcca caaatcggga aatatcgaag cgtatcgcat
    16321 ttcgctggtg gagcgaattg gtgaggttcg cgtgcaggag ctggagaacg acaaccaaca
    16381 gcatcgatgg acgcgggaag agctcaataa aatccgggca accgcccgcg ccaatttgcg
    16441 cgaactgaaa aaacaggagg cagcgtgagc cgtgaagtta tcgaacgcat ccgtgaccgg
    16501 tggcaaaagc tccgtctgtt ccgggcccgc ggcactgtat tagttgacta ccgcattttg
    16561 aagaatttcg ttcgcatcta tcagaccctg ggagagaaag catgaacata caatacctcc
    16621 agtacgttcg ccagcaactg atagtggcca ctgccgatct gagcggcgca acgaaaggtc
    16681 aactggtagc ctttgcagag aacgcgcaat tcgctgcgac ggcgcgcagc cgggaaagga
    16741 agaaagtcgc agatccggtc accggccgaa tggtaaaccc gtctagcccg ccaatacctg
    16801 ggcagcagtc ccgcgccaaa ggttctgcaa ttgccctcgt tctgcccgtt gagtattcga
    16861 catccagttg gcgccgcgct ctgctttcgc tggaagagca tcagaaagcc tggattctct
    16921 ggaactacag tgacaatatc cgctgggagc accaggagac gatcacccgc tgggcatggg
    16981 aacaattcag cgagaagctg gccggtgtgc gcattgcaaa gaaaactgtc gatcggctgc
    17041 gtcagcttat ctggctggca gcgcaagagg taaatgctga actatcaggg cgtgacgcat
    17101 acgaatacca ggtgctggcg gagctggttg gtgtagcaaa gtccacatgg actgaaacct
    17161 acctgcctca ctggctggcg atgcgcagca gctttgtgaa gctcgacagc gatgctctca
    17221 tatcagtaac gcgaatacgc tcacaacaaa aagcgacaaa tttagatgca agtcttgcaa
    17281 aaccgaactg aaaaggcata tatttcatgt aaatctgata tagtcgccat aacattggtt
    17341 gtcgacgaac ttatagcctc gctattgtgc ggggctttgt cgtttttggg gcatgatgtg
    17401 actattgcta atcctctgga actgttaata aatgtttgca tccgctatat ttaactcgtt
    17461 ttaaaatttt actcatatct cttttgtttc acagttcgag cttatggata agtgaaggta
    17521 tttttggatg tctaagaaaa taacatttac atcaattatg actgccattg gtacagtagc
    17581 gtcagtcttg gcttgcattt acgcgatcaa agcttacgaa tcgagtaaaa ctccgacttt
    17641 tcctctggat gatgcatata cagattcaat tgagatttcc tctttgacaa aaaatgcaca
    17701 tcgctttgaa gagttcttgg gatcacatgt tgggagagtt gtttatctca atgtgtattt
    17761 cgaccctgac tctggttatg ttgatgttga taaagagcct gaactttcgc cggaagagta
    17821 tgagtcttat gacaaagaaa ccaaaaagga aatagatgag cacaatgagg cctttgatca
    17881 aagttcattg actatttgga cagaatgcta tgaaggatat aacaaaaaat taaggccggg
    17941 tgtcgataac tactgcactg gtataactat tagtttttta aaaaatccta attcttactc
    18001 aagccttgat tggtttaggg gcgcttacta tttaaaagga ttttttcaag ttgtacacta
    18061 cagtgggccg taccagggat ttatggttgc gacactaaga ggtgaaagtg ccagataagt
    18121 actcaaattt tataggtgaa cgttatcaaa ggctcgcttc ggcgggcctt ttctttttct
    18181 gttagtcact catatagcct gtgtttgcag gggtacaaag aagtaaagca gtttaataag
    18241 tctcggcaat ccctttatgt acatttaacg tgtcctatca acggataaac tgtacataca
    18301 tcaaagaggg atacatcgta tgaaaatgaa tttcatcaaa ctgcttccgg tactactgtt
    18361 gggtgcttgc tcaacgtacc aaccgcaaga gacagccgaa cagcaacctc atcagcaaac
    18421 tgtaacgccg gaaccagctc gtcaggcagc ggttgcagcg gtcgcggcag tgtcgaaaga
    18481 taactgtctc gtaggttgcc ctactggcgg cagttctcaa acgctgattc gtgatgcata
    18541 tacgctgaac aataacagtt cgacgaagtt cgcgaattgg gtagcgtata aaatgacgtc
    18601 atcaagtcaa gcaagtggcc gttctcgcac ctggcgtcaa gaccctgatc tgccagcctc
    18661 tgacacatta gcgccagcag catacactgg cgcaaatgct gcgctggctg ttgaccgtgg
    18721 acatcaagcg ccgctcgctg ggctcggtgg ctcatcagac tggcaatctc tgaactatct
    18781 atcaaacatt acgcctcaga aggcggactt aaatcagggc gcatgggtac gacttgaaga
    18841 taaagaacgg gctctgtcga atagtaaaac tgtctacaca gtgactggcc cactgtttga
    18901 gaaaaacatt gcaacgctgc ctaatgcgcc agcagttcaa atccccagcg gctactggaa
    18961 gattttgttc actggttcta gtccggctga tggcaaattc gcggcgttca ttatgaatca
    19021 agacaccccg cgtgcggcta acttctgcaa tttccaggtg acggttagcc aaatcgaaca
    19081 gaagacaggc ctgacaatct ggtcagcatt gccagctaac gtcgccagca caatcaaggc
    19141 gcagaaaggc tcgctcggta gcgatctcgg ctgctaatac cgctcagcag taaccaatca
    19201 ataaatcaca tagcccgctg caagccagtg gcgggctttc ttttcccctc gttcagagag
    19261 gatgcacagc aacagagggg gctaaatgtc cgaacctttt accagtaccg gcgctgctgg
    19321 ttctgcgctg gcgggtgcca gtttatacgg gattctgacc ggaacagatt acggggtggt
    19381 attcggcgcg tttgctggag ccgtatttta cgttgtaacc gctgccgagt tgacggcatt
    19441 cagacgtatc gcatatttcg ttgtgtcgta tatcgcaggt gttctgtgtg ctgggctggt
    19501 gggctctaaa ctctccgcgc tgactggcta cagtgacaag cctcttgatg ctctcggtgc
    19561 agtaatcgtt tcggcgttag ctatcaaaat cctgacctgg ttcaacaatc aggatatgga
    19621 cggcgtactc aatgcgctat cccgattccg tggaggtggt ggaaatggca gctctcgtta
    19681 acgtcattat ctgcgctgtc atcgttgtcc tgctgatgtt ctatagaaag aacggagcga
    19741 gacaccgccc attaatttca tggctggctt acctgctggt tctggtttat gccagcgtcc
    19801 cgtttcgcta cctgttcggc tattacgacg caagctggct ggttgtgatt gcgaatatgt
    19861 ttatctgtgc ggctattctg cgtgctcgcg gtaatgtcgc ccggcttatc gatgtgctga
    19921 ggttctgatg acgaaagatg aaatcttcaa cgcaatcctg aatcgtgagg gtggctacgt
    19981 aaatcatccg gctgaccgtg gtggcccgac aaactggggc gtaacagaga aagtggctcg
    20041 ggcccatggt tataacggtg atatgcgtaa cctgacacgt cagcaggctc tggaaattta
    20101 cgaggctgat tactggtatg gtccgagatt cgatcaagtt gccgccgtgt caccagttat
    20161 tgccgctgaa ctgtgcgaca caggaattaa tatggggccg tcagtgccat ccaaatggtt
    20221 ccagcgttgg ctaacagcaa tgaatgacgg cggacgttta tatccagatc tgattgcaga
    20281 cgggaatatc ggtcctcgta ccattactgc actgcgccaa tatttggcgg caaggggcgg
    20341 ggaggctgag cgtgttttac tgcgtgccct gaattgtagt cagggtgctc gttatctgga
    20401 gttagcagag cagcgcccag cgaatgaagc atttctgtat ggctgggttc gtgagcgcgt
    20461 tcagttatga gcattttatc gagctggaaa atagccactg gtacgctggt ggctggcatt
    20521 gcgatcggct ggtacgttca ggggctgcgc tgggatgctg atgctgccga aactgggcgc
    20581 cagcattctg atgatatcag agcaggccag caggcaatca ttgcgcgtca gtcgtttgat
    20641 tttcagcgct acaacgagat agcacgcaac gcgaaccagt acgccatcaa catcaaaggg
    20701 cagtcagatg aaaagcaggt tatttaccgg acaattatta aacgtgatcc agttagtggt
    20761 aagtgcgttc ctgatgatgt tgctaatcgg ctgctcgact acacgtaccg tttacgtgcc
    20821 agcgcaatgc acaccgttgc cagcggggtt gacacagccg gttctggtgc cgctgcctcc
    20881 ggctgccgat taacgtatgg tcaggcggtt tactggattg acccgttatt aacgacactc
    20941 gataaggcgc taaatcaatt ggcgggaata cgcgaagctg aattagatcg cgctcgctga
    21001 aaaataacac caaggggttt actatgctta ttcggttaaa tcacttggag aaaggaatgc
    21061 acgttactta ccaagatatt caacagcaat acctgctcac gaaaaagagg cacggagaga
    21121 gaagagctaa gctgcatcag gatgcatata gccttgttgc agagtataaa gattcgctgg
    21181 cgctcaaatc ggatacgtgg cgtaacagtc aggcggatga taacccatac gttacgacag
    21241 gaatacttag taaaggggag taccaaagaa aaccaatatc ctcatttgat attgacgaat
    21301 cgctatcgtt gaagtttgtc atcgccacgg tgatcgatga ttccattatg ggtggttctt
    21361 attacctcat tgacatatca atgcgctatg agaacgggct tcttattgtg gatattgggg
    21421 ctgggaaaga agagatcatt gtagccgacc ctggcaaaga tggaggctat tacgcagttt
    21481 gttcgtgcat caaacagcta gtcctatccg gcttaattga tcatcgactg gaatagatga
    21541 actcacacgg atcgactatc gaggctgtga agtaaggcat tacaacaggc attcactgag
    21601 tgcctgtgat aatgcttggc acgcgcgtcg tcgtgatggg agtttggagt ctcgaaatta
    21661 atccgagatc caaatagaca actgaaacag gtgatttgaa acagaccgcc tccgggcggt
    21721 tttttattgc cagcgcttac tgttttagcg ttaagcgctg gcgaatagtt atcacttcat
    21781 ggatttaagt atttttaaaa taatgctaag tatccgctct atgggcttca acttctccct
    21841 attggttagg agtagaagga taagaacaat gataataaat aaaccagtaa agacagtttt
    21901 catgcgtatt cctcgtaaaa cccttaacgg aattgctaag gaatatgccg tttacagttt
    21961 tagatatgcg gctcatgagg gcgtaaggta gtgacatgaa aaaaacggat tgggagtcga
    22021 tcaaacgcga ttatgcagcc ggtcaacttt cgatacgggc tatcgcggaa ctacatgggg
    22081 taagcgacac agctattagg aaatccgcaa aaaaggaagg ttggacgaag cctgaaaaag
    22141 ttcgcaaaac aggttcgcag aaaactacga gtgcgaacca aaatgcgaac ccgcgaacca
    22201 agcaaaaaaa tcaaattcct caaattgaaa atcaaattga ttcgaattgc ccgtcaattg
    22261 aaaaatcgaa cgatgactgg acgctaaacc ctgatgaata cgggctcaac gacatgcagg
    22321 ctcgtttcgt gaatgcgtac ctcatcagca tggataagac tgccgcatac aaaaaggctg
    22381 gctattcggg tgagggcaat acggcaattg cagcagcatg ccggttgtat agaaatgtta
    22441 aggtcgcgcg agccattcgc gatgctctgg atgcaagaga acgccgcacc caaatcacac
    22501 aggatgacgt gctgaaaatg tggtgggaga ttgcgacagc tgacgcaaat cagattaccg
    22561 aattgcgtcg cctgtgctgt cgtcactgct ggggatttgg tttccagtac cagtggcaag
    22621 acgctgtaga gttcgaagag gcgagcgata gagcaaagca ggccaataag ccggagccga
    22681 aagataacgg cggctatggc tttgacgctc agctcgatcc gaaccctgag tgtccacgct
    22741 gtaacggtat gggtgttagt cggtcacact ttcatgacac gcgtgattta cgcggcgcag
    22801 ctcgtcggct atacgctggt gtgaaagaag gtaaattcgg tctggaggtc atcacccgca
    22861 atcaggatga agcgctgaaa atggttgcac aacatcttgg catgctgaaa aaccgaacag
    22921 agctaacagg tgctgatggt ggtccgatca accaggtgaa ttacacgcca gaggattacg
    22981 caaaggcgca ggcggcgtta gaaaatcaac tccccgattt ggattgaaag cggcagagaa
    23041 aacataggga aaaatcggtt tcatctgtcg ttttgctcga actgcaatag cggcgttttg
    23101 ttatcaaaat gttgctgtcg aaaaacctca tttattaccg agaaaactat cacttttaac
    23161 gctttcgtgg cgattttggc gcgagcgccg atcgcgtggt gcgcaaaacc tacaatatgt
    23221 taaatagccc ccaaaacggg taaaaatcgg gattgaagaa atgtcacagt taatcgaatg
    23281 ggaaaacctg aattttcccg atcgggtggc attgaaatcg aaatcggaaa aatcattcct
    23341 caatttcacc cgtatttggt ttgagatgtt gcagggcgat cgcttgctgg tgaattggca
    23401 tcacaaaatg atggccagcc agattgatga tttggtggct ggcaggttgc agccccgaaa
    23461 cctgattatc aacgtccctc caggtggcac aaaaaccgag tttgtttccg tccatctgcc
    23521 agcttatatc aacatgctgg tgcaaacgga aaagctaagg aaattccgca atctcaatat
    23581 ttcatttgct gacacgctgg taaagcgcaa ctcgcgccgc acgcgtgaca tcatcgcgag
    23641 ccctgaatac caatcgctat ggccgtgtca gttcggcgta aatcaggctg aggaatggga
    23701 ggtcgtcaac ggtcgcggtc gcactgttgg tcagacagtt tcacgctcca gtggtggaca
    23761 aataacaggg ggcgcgctgg ttatcccggc cccgattttt ccggcttcgt ttgtctcgat
    23821 gactacaaca aaccggaaga catgttttcc ggtaccaagc gtgataacgc caatcgcctg
    23881 ttagtgaaca ccattcgttc acgccgtggt gataaatcaa aagatcatcc gacaccattt
    23941 gtcagcattc agcagcgatt acacaccgat gattcgactg gctttatgtt ggccggtgga
    24001 atggggatgg atttccacca cgtcacaatc cccgcgttgg ttagcgaaga atatatcgat
    24061 tcgctgccag agccgtggcg gtcgctgtgt tggttctccg ttaagaagac cgagagcgtt
    24121 gttgtcggtg gcgtccgtta ttggtcgtac tggcccgtaa acgaatacgt cggcgatttg
    24181 atgcggctgt gggagcgtga tgaatacacg ttcctgtctc aatacatgca gcgtccgcgg
    24241 gcacttactg gtgggctgat tgataccgat tggtttaagc gttacacgca cctgccgcaa
    24301 ctcacgcacc gcgccgtcta tgtcgatacg aacagcggga aagttgagga tttcaacgac
    24361 tataccgttt ttacgctggt gggcgtgggt attgacggaa acctctacat catcgacagc
    24421 gtacgcggaa agtgggaccc cgaagatctg ctaaaaacgg cgattgagtt gtgggagaaa
    24481 tggcgaccat tcgatcgcaa acgtcctgca ccactgcgcc atatggggat tgaagacaaa
    24541 caggcaggac aaggcttaat caccacgctg aaaaaacgca agtcacttcc cgttctggaa
    24601 atcccgcgcg gcgcagggca aaacaagctc attcgatgcc tgaacacggt cccccaaatc
    24661 aaaacgggaa cggtgttcat tcccgctctg ataaccgatg acggccagag agtcgaccag
    24721 gtttattacg cagatggaac cgtggccgca cgaactgatt gggttatgcc agcactcgcc
    24781 gaatgcgcgg atttctccgc agatgacagc cacaaaaacg acgacattct cgatacgttt
    24841 atggacgcga tcgagatcga attaatttcc ggcgctagtg ccgggtgggg atgggtttaa
    24901 cgatgaccga taataaatac ggcggaaagc ccagaatccg agttagcaac gatggtctgg
    24961 ctaacatgat gaccggaatg gggacggagc gtgaccgcag aacgtttaac cgtttcatgt
    25021 tcaacatgct gcaagatttt gcagagttgg aagccgctta cattgataac tggatcgccc
    25081 gggacattat tgatattccg gtcgatgatt ctacccgcga atggcgagaa ttcgcctctg
    25141 atgacgcgac cgccattcgt gaagcggaga agctctataa cgttcagtcc gtaacgcagg
    25201 atgcgtttaa atgggctgga gtatatggcg gcgctggcgt gttgatgatt accgatcagc
    25261 cgttcaacag accgctgaga gtgaagaaaa taaagcaagg ttcgttaaag cggctgctgg
    25321 ttctcgatcg catgttcatt aacggccagg cgtttaacgt caccaatccg ctggcagaaa
    25381 attacatgct gccggattac ttcgttgtga acggtggctc tcaacaaatc cactatagcc
    25441 atttcgtgaa agcgccaggt gctcagcttc cgatgcgcct acggatgata aatggcgggt
    25501 gggatgacag ccgtttgcgt cgatgtttag aggacgttaa agatgcggtt tctgccaaag
    25561 gtggagttgc ggcgctgatt caagaggcaa acattgacgt catcaatagg gaaaatctgg
    25621 ctaacgatct ggcagctggc gacatggatg atgtcatagc gcagcgatac aacatttttg
    25681 gaatgatgaa atccctctat cgtctggcac tgctggataa gaatgaggag tttgatcgta
    25741 aacaaatatc atttggcggg ctcggtgaaa tcctgtctgt gttgatggaa tggacggctg
    25801 gtgccgcagg cattcccatg acgcgcctat ttggcgttca ggctaaaggt ctgggagata
    25861 gcggtcaggg ggatatgaac aattactaca acactatacg tggtggtcag gagtcgaaat
    25921 atcggccgtt cctgaagcgg attgatgagg tgttgatccg ttcaacgctg ggcaccatgc
    25981 ctgatggcct cgattttgag tttgccccgc tatcacagcc cactgatacc gagctatcag
    26041 cacagagact ggcagatgcg caggccgatg aactccgctt gcagcaaggc gttgttcgca
    26101 aatctcaagt ggcgcgcaaa ctgatggagc aaggcgttta tggcctcaaa gagtctgata
    26161 ttaccgagct cgaatctgac gaaaaagcag agcgggacgg tgattacgaa ttccggcttg
    26221 cagaatttgc aggaactgat ggcaaaaacg ccaatacgcc gccgagcgcc aatccggcca
    26281 atcaagccga atgacgccgt cgagcgattt tatcgggcac agctccgcga tattgtccgg
    26341 cagatggcgc aggcggttga tgaagcgctg gtgccggtac tgcatcgaaa ctacacggca
    26401 gacagttacc ttactgacat tctgaaagag gccattcggc aggcgtcaga gcgattcatg
    26461 aatacggcgt ttcagcgcaa cgctgagcgg ctatctcaac gcgtcgttag tcgtgctgag
    26521 tcggacagtt cagaggcatt tgtcgagcag ataaaccgcg ccatcggcat tgatatgaca
    26581 gcgctgatgg ttaacgaaaa tctcgtcgat tatgtggatg cgtcaataga gagcaacgtt
    26641 gcgctgatta agtcgctgtc atcggattat tttgaagatg tccagatgca ggtgtttgac
    26701 gggatcctgc gtggcgattc gctcacgacg attgttcgta acctgcaaca cagtacggga
    26761 accgcataca accgagcgca tctgatagcg cgtgaccaga cggcaaaaat tcaggccgat
    26821 atcaccagcg cacgacagca gaacgcaggt atcgatcgct ttcgctggtc aacatcacag
    26881 gacgtgcgag tgtccggcaa tccagcggga aaatatcccc tcgccaaaat atcgtgtttc
    26941 gctatctcac ggatagatat tggtatgggc gccggcgttt atctatggtc acgcggggct
    27001 aaatataacg gtcaaactga ccttttcccc ggcagggcac acatcgggtg ccgctgccat
    27061 gccatcccac aaatcaaagg tctcgactac tgaggactaa tcatgcggat cactattcgt
    27121 gaccgagtgg catttcccgt tccatcccag cgagaaatca cacccgaagg ttacctaaaa
    27181 gttcctgggc gggttgctcg cgtcggtatc cagcagtatc tggcgtccga gttgggacta
    27241 acggacaggc cacctggtca gatcgttaat gtttatcgcc caccagagga ggtttttaaa
    27301 tccagtagct tagcgagcta cgacaacatg gatatcacta tcgatcaccc cgatgaccta
    27361 gtggactcca cgacgttcaa ggaggtgacg gctggtcatg caatatcacc cggtcggcag
    27421 gatggtgatt atgtcgtcgt tgatttgctg attaaagacc agcaagccat taacgagatc
    27481 gacgctggta aggctgaact atcagccggt tatacatccg agtatgacga aacgccaggc
    27541 accgcgccgg atggtacgcc gtacgagttc attcaacgtg acatcaaaat caatcacatc
    27601 gctttatgtg atcaagccag agcaggtcgc aaggcgcgat tattcgatgc taaaccaacg
    27661 ggagaacacc ccatgccatt tattgttgtg ctggattccg gcacgcgcgt gacggttgca
    27721 gaagaggcaa cgtctcaact gattcagacc agtttcgaca gtctgaaaag gcgcgtaacg
    27781 gatgccgagg aagagaaaga aaaagccgag gccgctaaag accaggcgga agaggaactg
    27841 gagaaggaaa aggccaagtc tgacgcgaag gacgaggaga tcgaaaaact gaaggagaaa
    27901 acctccgaag actcgatttc gaagctgatc gccgaggtcg tgtctgttcg tgattctgct
    27961 gcgaaaattg cgggtgaggg attctcctgt gattcactcg atccgatgaa aattcggcgt
    28021 gcggcgctgg atttcatggg catcaaatgc aagcagggct catgggataa ggcttctgac
    28081 gcttacacgc tggcctactt tgacgcggaa gaggagcgca aagaaagcga ggatgaagaa
    28141 gaggaagaga ataaaatctc caacgattcg ttaaatgcat tcactcgcga tatgaaacgg
    28201 gtcaaaacag gcggcgcaca agcaacgcgc gatggcgttc gtcagtcatg gcttgataaa
    28261 cgttatggta cgcaggaggg caaataatta tggctattgc tcaagacagc ttttcgcttt
    28321 ttcgcggtca ggcatatgag ggtcagattt cgacgactga tgttgttgag gttgtgtccc
    28381 gaaaagttga aacagagctg gtgcaatttg gccgcgctgt gatccgtggt atcgagaagc
    28441 gcagctgcgc gccagtgggt gcgactacga ccgctgctga tatcatcggt ttttctgttc
    28501 gctcaatggc tacatccagt ccaaccccgc caacgaatcc cgccaattac atcacaggct
    28561 atgccgttga tagcgttgca tctgtattgc gacgtggcgg tatgttcgca ttgtgcgtag
    28621 acggtgccga tgcgggggag gctgtcagca taattctaac cgttggcgaa aatcaggggc
    28681 gtctgacaac tggctcgggc gcgggtctgc tggctctcaa tcaggttaag tggattgagg
    28741 atgtcgcagc tggtgaagtg ggtgaaatcc gcgttgacgg cattctgaac gtaagcgcgt
    28801 aataaggaaa aaatgacatg ccaaagagcg tattcgacgt cagcccggtt tcggcgctgt
    28861 cgtttttagt caatcaggct gcgcatatcg aggcggaaat ctaccgcatc gagtatccgc
    28921 agtttaaata cggcactctg ttgccactgg ataacagtgc acccgattgg gcagaagcag
    28981 tgatgttccg ctctatcgat tcacgcggtg agttgcaatt attcggtccg aattctaccg
    29041 atgtgccaac tgtagacatt gcgatgagtc agggactgaa aaacatcgat acggcggcgc
    29101 tgggctacac gtattcgatt caggaaatcg gattcgcgat gcttaacaac gtcaatctgg
    29161 acgctgagcg cggtcaggcg gtgcgtgatg tcgttgagca ggggctgaat aaaatctacc
    29221 tgctgggtga taagggcgtc ggtgaaggac tttatacaag ccctaacgta tcagtagaag
    29281 cggcggcgtc aacccttgtt gcgctggtgg ctgctattcc gacgaacggc acacaaccga
    29341 ttatcgattt cttcggtaat gcgtataaca ccgtttatct ggacaatacg ctgaccgttc
    29401 atcgacccaa tacgtttgtg cttccgccag cgcagttcca attgctggcg cgtacgctac
    29461 tgtctacgca gaacgcgtca aacgtaacgc tgttgcagtt cttgcgcact aacttccctg
    29521 atatcacgtt tgaagacgac atcctcctga aaggtgcggg tgtagccggt gcggatcgca
    29581 tggcggtgta caagaaagag atccgcgtcg ttaaggggca tgacgtcatg ccgctgcgct
    29641 tccttgctcc tgccacggcg gataacgtga acttcaaagt cccggcaatc ctgcgtactg
    29701 gtggtactga gtggcgcatt ccgaaggctg gccactatgt tgatggggta taaaatggct
    29761 gaattattca ataagcatac tgcgcccgta actgttactg atgccgttac gggacagcgc
    29821 attaccattc cgtgcggaca ctctgcgctg gtgtccggtg atttccgtaa tcatctgttt
    29881 gttaagtccg gcatgattct cgctgaacat gatgacgatg ataagccggt cgtaacaacg
    29941 attacgacga gtggcgtcag cgtcgaagag ttgcaaaaaa ccattgatgc attgcgagcg
    30001 cagatcgatg ctggtgctgg cggtgctggc ggtgctggcg gtgctggcgg tgctggcggt
    30061 gctggcggtg ctggcggtgc tggcggtgct ggcgacggag atgattcact ggataaagac
    30121 gcattgcgtg agcaatacga ggagctgttc ggtaagaaag ccgcctcagc cgctagcgct
    30181 gaaacgctga aaaaagccat tgatgagcga ctcgcacaaa gcggtgatag tgctggcggt
    30241 gctggcgacg gcaccaacga aaacgaataa accccgccaa attgacgggg ttttgcttta
    30301 tgggggtaat gatggaaatc acagcgcaaa tcgttgtcga ttttcgtgct tattaccccg
    30361 aattcagcga cgaaacaacg tggccagatt cgggggtaat aactgcactc gctgagggcg
    30421 acgcggaaac aggtaagcgt tgggggagat atccgaatgg gcaggttgtc agcatcaaaa
    30481 aacgcggcat gtttgcgttt gctgcacacc gcctggttat gcgccagcgt tctgctggtg
    30541 gcgatgtcgg cgcggcatat gctatttccg gtaaaagcgt tggggatgag tcaacatcgt
    30601 ttgctgttcc atctgtgacg atggatgacc tgacgattaa cggagatttg ccgctgacgg
    30661 cctatggcgt ggagtttatg cgcctgcgtc gccgtgcggg tactggtggg gtaatgatat
    30721 gaaactcaat gcagaagttc gcggcggaaa caaaatcgcg cagaagctcc aacagattca
    30781 ggatcgcgtt atggcgaagc gccgtgtgct ggttggtctg cccgcaggat ctggcaatta
    30841 tgaagacggc gcgccgatag ccgtcattgg ggctgtacag gaatttggct ccgctgacgg
    30901 acgcgtaccc gagcgctcat ttctccgcgt tccgattcgt cagaatcagg acaacatcaa
    30961 aaaggcgttc cgggcgttaa ccggcgctgt tgcgcgcgga gaaatcaccg catttcagat
    31021 gctcgaccaa atcggagtcc gcgccgctgg attctgtcag gaggcgattg aggcagggat
    31081 tcagccggct aacgccgatt caacaattaa ggctaaagga agctcgaagc cccttatcaa
    31141 tcacggtttc ttaaagggca aaatcacgca cgttgtggag gactgacgat gtttggtaac
    31201 ggtctggata tggaaggcca cgtcgattcg acgtttaatt ctcccattga tggaggcgtg
    31261 cggataattc gtgctggcgc tggtggctat accggaccag gtgggcgcta tgaagagact
    31321 acccccagcg aaacgatccc gctaacgcac gtcaacgttc agccagcgaa gtggaaagac
    31381 atgcagatgc tgatggggat gggcggtact gctaacccgc aggatgcgcg agtggtgcac
    31441 atcaatgatg gcgttaacta cctgtacccc gatgacaatg gcaaatttgc tgatttgctg
    31501 gagttcagtg acgggcaggc ggtgcgcaaa tggcgcgtga tgtcgtgcga taaccgaccg
    31561 tggcgcaatt tctgccgtgc cgttgttgag cggtaccgag gggctggcta atggagagca
    31621 tcagcgaact gtacgatgtg tttcagcaac tggtgtcgct gacgtctggt gttgaaacgg
    31681 tcatccttgc cgatcagggg cgtgacgcgc caactggcct gtatgccacc tacaaaccca
    31741 tccccattcg cgcatacggc tggtcgcagc ggcgacgcga attaacccct gcaacggaag
    31801 ataccgatcc cacgctggga cagtggcagg atttacgcga aaccgtggcc acatcgatgg
    31861 agttcatttt atccgtgaac atcatcaacg aaggcgcgga aagcgcaatc atgcgattgc
    31921 ataacgccaa tttccgtcag cccgtcagtg aattccttta ccgaaacgaa atagcttggc
    31981 gccacgtcag cacatgccga aacctcaccg gaattttgca ggcaggtata cagccgcgct
    32041 ggcaggccga catccacatg ttcatcgaac acaccgtttc atacgagcta ctgcgtgccg
    32101 cagggttcga tattcaatta actaacgagg ggtaaacatc ccgatggctt atccagttga
    32161 taacatcatc cctgtcaatg tgctgctaac gccagcggga ctggggtatg ccgacttttc
    32221 cagtgcgata gtgttcgctg atgcggcgga tttgattgct ggagtgacat tcgcggttga
    32281 tacgttccgc gattacggct cagtaactga tgtcgctgct gactttaaaa cggacagtga
    32341 catttaccgc attgctacgc gctatttcgc caatatcccg aaaccaccag caatcaccgt
    32401 gtggatgaaa aacgcgaccg atacgctact ggaaatcatc aacagcgcga acgatcgcat
    32461 ttggcgctat cactatttcc tcaagaacgc cgatgtgacg gcggcaattc tgccggattt
    32521 atcggactgg tcggatgccg caagccaccc gctatggttc acgtttagcg cggataacat
    32581 cattgaccag aacgttacca atgatgtgat ttctgccctc aaatcgaaag gcaaccgcca
    32641 tgtattcgcg ggatacaaat cagcgtcgtc tgttactgct gacgcgtcac aggcctacgc
    32701 catggtgcaa ctggcggcag cattccacaa attccggcct gcgggtatca ataccgctat
    32761 cactggtgaa tatcaggtgt tgcccggtgt cagcggcgac gatctggcca tcagcgcata
    32821 caacgcacta aaggcgaaaa acgctgtatt tttcactcag attgaattag ccggcgcaac
    32881 cgataacagc cgagtcatca acagcaaatc gatgtcgtcc tacggcgaat ttattgatga
    32941 tgtggttaat cttgatgtac tgaaaaacca tatgcaggtg gacggttaca attacatcgc
    33001 gaatgcaggt tctaagcgct ccatgacgcc gcgtgattat gctggcctgc tgtcggccgt
    33061 ctcggccacc tgcaagcggt tcttcgataa cggcgtgctg ggtaccggct cgtacgtcga
    33121 tcccgacgat ggaaaaacga aagtggcgca gttcggtttt gtgctgcgca gctcgcccga
    33181 ggatgtgctc gacatgacat cagcacagcg taaagcgcgt gtttatccac cgacatcact
    33241 gttggtcatt ctggcgcgtg ctggtcacgt cgctgaaatc aacatcaacg tagagtaagc
    33301 acaatggcaa tgaaacgcta tggcgctgac ggcgctaacc taacgttatt cggcatcccg
    33361 attgatgatt tcggcgatac cgatccgcca ataacgatcg aggatttaga gccgcgcgca
    33421 acactgaaac gcggtattgg taaaacatcg gtgcgtctgg atagccagac gcggccaaaa
    33481 cgggtcacag tcaatctgat ccccggctcc gaccaagtgc ggcagattct ggcggtggaa
    33541 aaaacaggtg tagatgccac gtttacgttt ttccagacag gaacggcgga aaccgtgatg
    33601 gggtttgatg gcgtactggt taaccgcgga tcaatgacgc gcggcggtaa aaccagtgtt
    33661 tctgacgaac aattcatttt tgagtttgca gacagcgagg aaacctaatg ggacgtcgta
    33721 ttgaaattga gattgatggt gtgctgtaca caggcgctac gccgtcagca aaagaccaac
    33781 tggaaatgtt gcaaatagcc accaaaaaca gcgtgctccc tgcgctgggt gataatgcat
    33841 ctgatatggg gttagccgtc gcgcttgcca gcatggatgc gttgtcgctg aatcgcctaa
    33901 aagagttgtg catcaaaaac ggaaaaatgg tgcgtgatgc cgatagtatc cctgtcgccg
    33961 aaaacctatt tcaagaccag atccaaaact atctgctgct gctgggcaaa gccttgcggg
    34021 aaaatatcgg ccctttctgg aagctcagcg cagggagcga aaacggcgca agcgcaacag
    34081 cgacgaacga gacgacagcg gcgtagactg gtttttatgg cgtccgtgtt tgggggcagg
    34141 tgatgcctgc ccacctttgg cgagatgggc tgatatgctc gatggaacgt acacgattga
    34201 tgatgtgcag atcatgcacg ctgtaattga agcagcaatc gatagcgtgg agagggctag
    34261 agaaaatcaa aaaaactgat agcaaaaaca aggacgtttt caaaagacgc taaagtgaat
    34321 tgcaaaactg tcgatatctc ataatgtaaa atttgaattg tgaaattggg aattttttta
    34381 tcgaagattt tcaattgcga aaagttgaaa ggtttttgac gtacagtatc tacgtcaaag
    34441 ttgttgctca tttatgggca cgataataca ctgtattaag cacaagcaat aaccagtgct
    34501 tcgaagcatg aacccaagga ctccgacaac gcttggagga caaatgaaca ggtcaatagc
    34561 gaatcaagta atgccactaa acatccctga tgctggcttc aatgccaaat tgagcgtaac
    34621 tgaaaaaaac gttgaacata cgacagcttt tttgcaaaaa ggagtcgagg atttctcgtt
    34681 acctggttat acgactcctc acggataccg actcctgaaa tcgaggagtg atgatcacta
    34741 tcgcttgatc actgatactg cgattccaga gacagtctac gcagtgcgtc ttgaatttat
    34801 gaaccacatc gtccctgctc gcaaaacttg cacgcagata atggtatggc gaactgttca
    34861 gcctcagtac tataccgctg tgaatggatt gccacgattg ttctttcagc atttccttga
    34921 aaactattcg atagtcgtat cggatagtga gcaaaccgca gatggtcgcc gcttctggga
    34981 aacaatgata gctctggcga tgcaaaccaa aggctgctat gtctacgtat cagatggaac
    35041 gaaagaagag cgtccattga cattcatgac ttcatgggat gatttttatt ccacatggac
    35101 aaacttctgc tggggcgacg acaaagattg tcacccacac cgcctcttag tcataagcaa
    35161 agagaagttg cactgattac cttgcttagt aatcaatagt taccaaaccc gccgaggcgg
    35221 gtttttgctt tctatcatgc gtgtttactt gggtagtttg acgctctccc taatgtagtc
    35281 atggaagttc agatcgaacc cccaaacgac caaaccaaaa atgattacta ccgtagctaa
    35341 aattttcttg ttcatgtgat atctctgatt ttaggagatt caatcctgcc acgcgtgcgg
    35401 ctgaatccga gaacgttaaa cgggacgttt tgtggtcgaa aaccagaaaa gtagaaaatt
    35461 gatctaaatt ggttttagcg catccatgca ccagtgacta aataaacaaa ttcgacaact
    35521 tagccgcgaa gtcctctttt ctggcgacaa tccagccctc gcgccgtgcg agttcggcga
    35581 atgtgttcca gcttgccacc agctcatcgg gtgcgatcgg taacgacccc gtcaccgaac
    35641 cgttagcatc gaggtaaagt aacacgcgac gggagcccac aggagctacg gcggttttcg
    35701 ttgcttgctg tccacgctgg atgtattcac cctccagagc atcgaggtag ctaatggcct
    35761 cattgatttg gtctggcggt aattgctgga tgttttcgat atcaaaacgc ttgtgaacca
    35821 gtttccagat atcggggtag atattgccga cgccggaggt gatcaggcgt tcgacagtct
    35881 gacgtaatgg agtgagttgc ttggcggtgg attgcttggt tttacgaaca ggttcttccg
    35941 ctcgcttttc acgttgactg aaatagaaat cttccaattt ctcgaaaaca tcccacgcct
    36001 gatcggtttc cagcattttg gcgtgacggg ctgcaccgcg ttcagtccag agtataaggc
    36061 tgcgagcgcg agaaccaaca gagtctctta aagatactct gtcgttttta acagagtcac
    36121 cattagtgac cctgttctta aacaggcgta attcatcgcc ttcgatcttg aaaaagtgct
    36181 tccccgctac aaaccgagtt gtattgctac ggtggttctt tgtgatggag tgagcggtag
    36241 taccatacag ttgcgccagc agatcggtgg taactacagg aacattatta tggacaacaa
    36301 ctgataggtt ttctgcggag atttgggtag tcataatgac ctcactgatt tttttgagaa
    36361 gaccactttt gatggtggtg tcgggaggct caaaacggct cagtgaagcc gcggacttat
    36421 tcccctttcg ggtgttgtat tagtcgccct cccgaccttg attcggggcg tgaccgcgca
    36481 atgcgttcac tgaatgacag gcataaaaaa tccaacacta acggggttgg ttctgaccgc
    36541 actgagaaga ggttttgagt cctcgtgcga aagaagatag cggatagtga tcgttgcgtc
    36601 aacaggtgct aggatgtaga aaacccattc gaacagtata aaagagatat gtccgcacca
    36661 agacctctac caaaaacaaa cgaattactt agagagttat tcccgtcaat tgaagcgggg
    36721 gttaattttc ttgatgagtt tacgttgaga cgcattatcc gggaagcgca gaagctaccc
    36781 gatgctgacc aggcttactg tgttgaaggg ttggcccgaa tgattagtgg ggataccgac
    36841 cgaggaattg aattatgcga aaaggctata tcaataaatc cttacgaaaa ggcaaattgg
    36901 gctaattacc ttagacttct acgctcacta tttatttaca gtaaagaatt ggtagttatg
    36961 cgaggtgttc tcgaatatct ggacagtgag atgctgtcga aattaatcac ttattccgtg
    37021 atatggtgca atcttgactt actaagatct gcaattaata aggctaaaga gatgggagta
    37081 gaagtggata ataagaacgc tgaatctatc atttctttgc aggaaagatt tcctagcgac
    37141 atggcggata ttgagaaact cgccggattg gtgatggaga tcgctgaaga agagaagata
    37201 ctatcatcac atagcactgt aactgaagat gtgcatggct atcttgctta tggatttagg
    37261 gtaaatacgg atgaccctaa ttacctattc agtcttaacg acaggctagc ggatatgatt
    37321 atcgatgcag gtctagcaac agtagacagt gtagcattct ttgaggcggg ggttgacgag
    37381 taatggtcaa ccacaacgac tttatcaatt tagctgaatc tttattatca tctgatgatg
    37441 atatagctat cagaaccgcc accagtcgcg cctattatgg tatgtaccat ttcgctatga
    37501 atttagtgaa gaacaacgta ccacactatg actctaaaaa ggttcgtggt ggtgtccatg
    37561 aaaggctaac gtattacctt gctaatgaag cagcggaaaa agaagatctt gaccctgtaa
    37621 aattacagaa gatagcgata aagctaaaaa ttgcaaagcg acatagagtg gtcgctgatt
    37681 ataagcttaa tctttattta tctaagacga cagccgccga aaccgtgatt gaggcgaaaa
    37741 tgatggcaga aatatttaac gactagcgaa atgctgtgag ggcaaggatg tgaaggtgct
    37801 tattttattg ctggcggcgt tttcgttttc ggttaatgcg atagcgagta attatattgg
    37861 aaagaatatc atcaccgggt ctgggaacag attcgctagt gggatggtga tcgctggtgc
    37921 agaatccgtt ggtaaggata gagttaaaat ttatttcatc gattactctc atgatctagt
    37981 tacaaacgag atgaaacctg atttttttaa aatcggatta atcaatcatg aagagacgat
    38041 attaaactgc aaaaagaaaa catactcatc atattccttt ggtgagataa agaacctcga
    38101 caatgtatca ttgtcttatc atgagttagg agcgcctcat aaatgggggg attatgattt
    38161 taaagatgat gggcatttgg gtgttgagtt taaaaaagac caagactcac taagtgatct
    38221 ttttggttat atgtgtgatt ctgcattaaa ttaacgacta gcttttataa ttagaaccgg
    38281 ccatcaagcc ggttttttat atccgcgcac cacatgcgca aacccaccaa agaacctgtt
    38341 taggaataga gcctgaggaa gccggtatgg ttcgtgctgc ctctttgggc tggttttcct
    38401 atgtggcagg ctctatttct aagaaggtaa tagcacaatg gcagaaacta tagatgaatt
    38461 actggtttca ctgggtttag aaaccgacgc gaaaagtttc gatcaggcaa gggcggcgtt
    38521 taagggcgtc accgataata tgctgcaaat ggcatccgcg cttactgctg ggttcggctt
    38581 tgataaactc actcggcaat ttgcaggctt tatctctgag ctagatcgct tctctcggcg
    38641 taacattatt gatcctaaca atgttctccg ttggggatat gcttttgagt cgatgggggg
    38701 cagcgttcgt gacgcaatga gcgcgataga gaaattaaac actctcagag atgatgcaaa
    38761 agagggaagg gttaacccga tggccttgcg taatgcggga ataaaccctt atgaactggc
    38821 tgaactaagt aatccacagt cagggcttat gtggatgtca tcgcaaatgc agcagctttc
    38881 aaacaaccct gatgcattaa caaaattcac aaaggctttg ggtctaaata caacagagca
    38941 agatgtttta tctaaaggcc ccgattggct taaccagcaa tttgaggagt acaacaaaag
    39001 agggcgaatg atcacccctg aaacaatccg aattgctgat gaatacaaca cagcaatgca
    39061 aaacattacg actaatcttg aggggttagg caatgccgta agtgttaaat taacaccaaa
    39121 attaactgct ctcgctgagc gtgccgataa atggttaacg gataataagc aagggattgt
    39181 agaaaaactc gaccaggcta tgccatacct tgagcaagcc gctaagggta tagcgatact
    39241 tgtcgcaata aatgcagcac aaaaaggggg gaagatgttt cttagcaatc tacccattct
    39301 tggcgctgcg gcttatgcgg aatattttta taatgatttc gacaatataa aagatagtgc
    39361 ttcatcttct tgggattaca acaagcgcca gcttgaaaag gggctaaacg aaaatcttaa
    39421 ttacccagtt ggagacgcat tatcatcctt agggtggaag aataatccat ggcgacgacc
    39481 agcgagggta tcatcatcga atccaaatgc tctggatatc cccggaaacg atcccctaaa
    39541 cgatattggg tatattaaaa attacctgac catgaatggg gtatcggacg aaaacgagcg
    39601 agaaagtttg gcggcggcat tcagccgtgc atcatctaaa catcgcgttc ctattaatgt
    39661 tttgcttggc atggcaaaac aagagtctgg ctttaatgct ggagctacag gaccaatgac
    39721 tgaatggggt cgggcgagag gtattatgca atacctggag tcaactgctg gtgggcttgg
    39781 tattgaccct aacaatccag aacaggctat aaatgcggca gcgatgcagt tacggcagag
    39841 aataaaccgc ggagaaagca ttgaagaggc cgtagcccat caccacgcgg gtcctaatcg
    39901 taagctgtgg ggagtaaaga ctgcggatta tgttaatcgc gttggggaac attcagagga
    39961 tgtattagct ggatacagat ctcgtcctga attttcaaga gcatcatctg ctggtgttgg
    40021 tggtgatact aaaataaacg taactgttga cgctagagga gcgactgatc cctccgctat
    40081 tgaagaggcc gcgcgaaggg gggcgatagc tgggactagg gacggattgg cggaagccgg
    40141 acgaaacctg aaactatcac aggagtctga tatccaatga gcatcgtcgg agtattcaac
    40201 aaatcccgcc cacagatacg cgggattttt tttgacgcca ttttggaaga gtcgagcgag
    40261 ctacctacag tggtcagcga ataccccctt gaaaatggct ataccgctaa tgacaacgcc
    40321 attactcgac cattggtagt gattatgaca gtggcgctct ctgacaaccc tataaagacg
    40381 ttaatggcgc aggcaggaca gctttcaacg ctaggggaat tggcgcgggc gtggctgctg
    40441 gcgctgtcgg ttcattgctg ggtggcggtg cggcggcgtt agctggtatt gctgccagta
    40501 ttggtctttc tgttacggca tctggaaaca aacggtcgca agaagcgcta gacggaatgc
    40561 gatggtcgca gcgaaatagt gaaatcctta cggtcattga ttccgctgga acgtcttatg
    40621 acaacatgat cattaccagc accagaacgc aacgcaataa ggagaatgag ggcgggcttg
    40681 agttggtggt tgaaatgcgt caattggttt tggttaacgc taatcgcagc gcggaggtaa
    40741 taaacgcaaa tttaccacca aacgacactg catccacaca gggacaggcg acaattaaca
    40801 gaggtgaggt atcgttacaa tgaatatcat cccgctaatt aactcggcag ccgaccaaga
    40861 gttttccgct cagttaggca ataacaatgt gtcatttcat gttcgctggc tgactcggta
    40921 tggctatttt gtggtggata tgcgcgactc agcaggcaat cctattgcac taggtcgcgc
    40981 catgcatgta ggcgtgaatc tgctggcggg attaaatacc cgaattggta aaatcgtatt
    41041 ggagggcgaa acacctacaa tttccaatct gggagaaaaa aatagcttgg tttggtatcc
    41101 atcatgagcg taatttttgg aagaagctac aagctgataa taaaatcaag catgggtgga
    41161 aaagacctaa tttacgagcc gcccatgcag atccgttttt ctgtggctgg atcaccaaat
    41221 aatcatgagt ccagcgccaa catatcaatg tatggaatat ctagagaaac acgctctcgt
    41281 atatacagag agtacgacca gatatttctt tatgctggtt ataaagataa tcatgggttg
    41341 atttttagag ggcaaataaa caacatagaa acaggaaagg atggaccatc aacttatatt
    41401 cgcttctact gctggagcca ttttgatagg tggcgtaagg cttcggttaa taaatcatgg
    41461 ggaaacaata caccagcaat agaaataatc agggatgttg ccagcgtatt tcagactgat
    41521 atagatgtca tcggagattt ctctgacctt ccgcccgcta tttatggaga gactcgggtt
    41581 ggcagcgcca tctatgaaat gaacgaatta aaaagagttt atgattttga ttggttcttt
    41641 gaaagtaccc ggatagttat tttcagaaat gggcggtctc gaaatttcac tcatgaggtg
    41701 cgagcattta atggcatgga gggcgtaccg agaatatacc tcggagaaat agaagtagac
    41761 gttaaactta atcacagcat tcgcatattg gattgggttg atgtttactc tgaatttgaa
    41821 acatacggat tcagcgatgt ataccgcccc ggcgaaggtg aagcgtcaaa gaaacagcga
    41881 aacattggga aatttgctgt ccttgcgact atgcatcaag gggattttta cggagatctg
    41941 tggaaaacaa caatttcagc aaacttgcgg tttgataatg ggagggttta ttgatggact
    42001 cgacgaaaag agaaaacccg ctttatgagg ccattgaagc agcgaagtta gccactgtct
    42061 cgcgccttat ggtgtgtctt ccagggaaaa tcatctcata caatcctgat aatcaaagag
    42121 cacaggttga atgcggcatt cagcgaaaaa acggtgattc gtttgaaacg ttgtcaatta
    42181 ttgagaatgt tcctgttaat ttccccggca cgaaagaatg gattattttt catgaattac
    42241 ccgctgatac tgagggggtc atccatttta gccagcgggc gattgatacg tggcttgatc
    42301 agggtggacc tgttgcgcca cataacatgc gtatgttcag cgccagcgat gcttttttct
    42361 cacctggtta ccgatcactg aaaacggcaa ttccgaacct accaacatcc ggtatgggca
    42421 tgagcaatcg tgacggttct gtgagaatcc acctgacaga tggcgggata gccctgacat
    42481 gtggcggcgt ttcgttgacg gtttcgcccg aagggataac gcacagcggc aaaacaacgc
    42541 tggatggacg gacagaggtt accactggtg gcctggctgt tggtgatatt gagtttaccg
    42601 atcacgttca tgacggtgtt gacacaggtt ccggcagcac tcaggggccg cgataatgtt
    42661 tagaacaata aatacgcagg tgctaatatg aaaacttaca actgcagaaa ggaaaccagc
    42721 atggcattaa cttatcagga catacgcgcc aagcgtgaac aaaacgaaga aaggcgcgac
    42781 aggttgataa atacagttat aaaagaagcc catgaactcc tcatagagta cgtagaatca
    42841 cttgaactag ggagtgccac gtgggctgat attaatggag taaaccgtga atatgtagaa
    42901 gctggggtga tgttcggggg tgaattcaaa aggtacccac tcaacagcat cactttagat
    42961 gacaaatatg gtgcgcgatt cgccatagcc acagtgattg atgatactcc tcgtggaggg
    43021 gagattattc ctatcggtgt ttatttatac atcagggatg gcaatgtaat cgttaatatc
    43081 gataattcca acaggcctat aacagtcatt caaggtgaaa ataaatataa aaaatgtttg
    43141 tgaagaaatt aaaacacaaa cgctagtggc aatgaatgac cctggactga attaaactaa
    43201 tccagttaaa ttcaacgagc ctcgcaatag cggggctttt ttatgggcgc taatcatgat
    43261 tcgtaatttt atagacggcg acattgtcac gcacggcgaa catttcgcaa cgggaaaaga
    43321 ggctacacgg caagggatca tcaggcggct gcggttgttt ctcggtgaat attttctcaa
    43381 tgccgcagag gggacgccgt ggtttcaatc aattctcggt aaaacacagg cagacattgc
    43441 cgcagccagc attaagcagc ggatcctgac tgctccgggc gtaattggcc tcactcgatt
    43501 tgagttcaac atcgaccaga ccacgcgaaa aatcacaatt tacgcatcgc tagtggacat
    43561 caataacgaa cagtttgaac tgctgtttga tgaggaaatt atctgatggc tgagattacc
    43621 aaagatggcg tgaacggaca gacgttaaac agctatcttg ccgtgatgcg ccagcgctat
    43681 ctggatgtcg atgacggctg gaatatcaat ccagaatcgc cggacggtct cgttatcgcg
    43741 gcgtggtgtg aaacgctggc gaatctggac gaggctgtta tcagtgctac cactcggcag
    43801 acccgaattc agcaatcgga cagcaactcg atcgcatagc ggcgttcgcg ggtattacgc
    43861 gccgagatag tacattctca actgttaccg tgacattcac cggcacgccg ctggttgaaa
    43921 ttccggccgg tactctggtg cgaaatcgga ttactggcac gctgtgggca acagatagca
    43981 ctgtggaaca cgcagcggcg gcacggcaac agccaacgtt acatgcacaa ccgctggcag
    44041 tcaggcggga aatagcaaca acctgtcgat cattgccaca ccgatcggtg gtatcaccgc
    44101 cgttaccaac gcaaaccccg catcgctcgg acgtgatgag gagtcagata atgcgtttcg
    44161 cgttcgtcgc aatgaatctg ttgcgtttcc cggcaataac cagctcgata atatttatgc
    44221 ggccttggtc aatctggagg ggatgaaaca ggtccgtatt tatgaaaaca ctgaatccgc
    44281 accagatgaa aatggcgtcg aggggcattc actggcgatc gtcattgacg gcggcgaacc
    44341 tgcggatatt gtcgaaacga tcgcgaaacg gaaaaatccc ggctgcggac tgaatcgcta
    44401 taacaacagc atcccgaaca aaatcagcac tgatacggtt acgccaggcg gaaacccgtt
    44461 taatgctacg tttttccggc cggagtttat tcctatattt gttcgcgtca gcatttccag
    44521 cgatcggcga tttgatgatg acgaaataaa acgctctatc attgagtatt caaacattgg
    44581 ttttgagcaa acaaccggat ttgcaaaaac gggatttcga atcggtgagg atgttggggc
    44641 gggacggtta tttacccccg tgaactacat tgtcgcaggc agcggatttg ttcactcgat
    44701 cggtgttgga atatcggcga tggacgcagg aacctccaga gttgatatcg cgtttaacca
    44761 gctcggtatt ttcagtgtag ataacattga ggtggcctat gtatgaccac cagaaaaagg
    44821 cattaagtcg tgtctattgg caatataaaa gttcaccgaa attaatagaa tggctgaaaa
    44881 tactgccgga tatcgctcag gctagcattg aggaacaggc ggataaaata caacggatgc
    44941 tggatatcga caccgcagag ggggaacagc ttgatatctg cgggcgcatc gttggttacc
    45001 gcacgcgacc gcttggtacg ttctcacctg catgtcaacc agcgcccgtt aatgatgatc
    45061 tatttcgccg aatgattagg gcgaaaatct tcaaaaacaa cagcgtggcc acgattgacg
    45121 aaatccagtt cgccgccgac tacatcatga atgagccaac acgtttactg gacgggcagg
    45181 acatggaaat gcgcctgatc tggttcactc acaacgttga tatcggcacg cagaaactca
    45241 ttcaggatta tgacctgatc ccgcgacctc agggggtggg gacgaaagac gtccgagtta
    45301 tcacgtacaa accgtttggt ttcggccagc attacagcaa cttccgcgcc ccgttctggc
    45361 acggcgactg catcaaaatc tacacaaacc tgaaactgac gctgacgttt tccgatggag
    45421 tgctatcggg tgcgctgact gcggcgccgg ggatcgtcgt ttcagacatt gacgtcacgc
    45481 tgatttacac gctgtcgggt ggggcaacag cgacggaaca tctggtaaca gacgataacg
    45541 gccagttcag cacaacacca caattcgatg aattcactgt cgtagcccgt gctcaggttc
    45601 tgacgccgct gtgtgagtgg gaaaacgtgc agagcggtga ggtggttacg aacatttttt
    45661 ttaacggaac cgtgacgttt aacggccgag cgaaatttag aggttaataa tgtcagacca
    45721 gattgaaatc cctaacatcg atgatctgcc ggacatgccg gagacagcag aatttacccc
    45781 tgcggttaaa ttactgacaa ctgaaacgcc ggttctcggc tatgacggta caaacattaa
    45841 tcccgcgaac tggcaggcga aagcgctggc cgaccgtacg cagtggctgc gcgaccgttt
    45901 gttaaatctg tccacgcggc tggtattgtc agttaacggt aaaacgggaa atgtcgttgt
    45961 cacgtataac gatgtgggag cggacgcggc aggaacagcg gacgcgctga tgacggcgca
    46021 tttaaccgct ctcgatccgc actctcagta ttttgatgaa acacgcggtg atgcacgtta
    46081 cgttcagcgc tcactggcga atcagtccaa cggatggctg caactcgatg cgtccggcaa
    46141 aatccccgcg gcgatgttgc aaacgctggc gtcgcgttat gtcgtcgtaa cgaatcaggc
    46201 ggaacggctt gcactggcat catcagcaaa cctgacgatc tgtgcgcagg cagatataga
    46261 tcagttgttt tatttgaacg gtggcgacaa tccggctgtg gccgcaaatt gggtggcagg
    46321 gcaggcggca acagtttccg gcgcgtcatc cgtctatggg cgaactggcg cggtggcggc
    46381 gcaaaacggc gattacgacg cagacaaaat cactgaaacg gcaacgcgta aattcgccag
    46441 tcccacagaa aaaacggcat ggaacgcgaa acagcctgcg ctggtgtctg gcgccaacat
    46501 tcgatcgcta ttcggacagt cgctactggg ctctggtaat ctcgcgccaa cgcctgcgca
    46561 aatgggggct gccgctgctg ttcatacaca cacaacagca gatatcacag actacacaca
    46621 gaaaacccag caactcatta cagcatcatt agaagccgga acgggcgtaa cgctgggcta
    46681 taacccgatc aacgggaaaa ctatcatcag cgccgctggc ggatctggcg gctcgaacaa
    46741 ttacatcgtt gttgatcgtc agagtgcggg cgcggggcaa ctacatacgt tcaatatcag
    46801 cacacagagt gcgtttgatt tatttgcatt tgcactacga gaggaatccg gttcaacaaa
    46861 cgttactgtt ttagttgatg attttaatgc gtcgagtgag tcgagttatg acgttactga
    46921 cgcgatcatt tttgacgggc aactacatgc gtatagcgga aaaattgcgc gattagttcg
    46981 tgatgatgaa ttttattctg tgccagtcag agcagatggt gagtcagttt ctgtgtcaat
    47041 tattagagaa acaatagtac ccgcaatgac atcgagcaat caggctggct atgttgcatc
    47101 tgcgtcgtct atattttcat ctgcgtttcc cgcatatatt gcatttgatc agaaaaacac
    47161 tattggaggt gctggggacg tgtgggcgcc cgcagcattg ccgacaatat ctgccccaca
    47221 atggctgcga atcgatatgc cagttgcgtt ttcagtcggg ggttactctg tgaaaaacag
    47281 aatttccggc gagttggcga gcccgcgatc ttggatattt cagggtagca ataatggcaa
    47341 tgtttgggat gatattcatt cagttactga tgacacaaat aacgtgggcg ggaatgttag
    47401 gagctatgaa ttgcaatcac ccgcgcacta ttcatcgtat cgtttactga ttacagcagc
    47461 taatgggggt tataattttg ttacaatttc cgaatttgag ttatatcccg cagcgaaact
    47521 tctgataaaa acatcaggca atagatggtt ttcatcaaat aatggtgttt tgattgaaac
    47581 aataacgcca ttatctgttg atgattttta tagtaatggg tttatttttt cgggagatat
    47641 ttccgcagcg cagttaaatg aagcgttcca tgtatacagc aacagtaatg tattggtctc
    47701 tataaaatat gcgccaaaaa aacagatagc gattcaaaaa tcattgtcgt cagcatcatc
    47761 atggtcacaa attaatacag caacgctaac ggccacgcag acgggtaacg gtaaagtacg
    47821 cgtcgctgtc acgcgggact tggtgaactg gcatgtattg cagaatgggg cgtgggttga
    47881 tgtgggtgcg ctgtcagccg atacggcggg cgcaacgaaa ctgattgagg atggtatgac
    47941 gcccgcagag ttgaatagta ttacagcggc acagtgggcg cagttgtttt catccaataa
    48001 tggcgtgccg gactcacttg cgtttgccta tgcgcttgat attgcagact catcagcaga
    48061 cgtcgctaca atagaccgtc tattactcaa tgtaaacaac acatcgtcat ggagattgca
    48121 aaatacatct gaggtagaaa ttcgttggcg aaatgacaac gtgacattca gaaatatagc
    48181 ggcagggaat tataaattag cgtatcaaat accatagagg aatataatgt tacgatattg
    48241 gttacgtctg gatattatgg aatatgtcag cagcggcgat gatttaacgt ttttgggcta
    48301 cattgaggtg ccgaaaaaac cggagcccca tccagaaata tacgcatggg atattaatga
    48361 gtggggttgg gttatcagtg aacagctagc gcgggagtcg attgctttat cgcgatatga
    48421 acgagagacg tcaggaatta catttaatgg caatcaattc cacacaacag atcgcagcaa
    48481 aaccatgtta tgtggtgcgg cgattaaatg tctgcgtgat gaaaataaaa cgttcaactg
    48541 gaaaactatt gacggtcaat ttattgagtt gtcctcgact gatattctcg aactgcatga
    48601 tgctgtcatt gattacgttg aatcgtgttt tagtcgagag caatcactca ttaattatct
    48661 gctacagaat gaattaacag cggaaatgat tgacgagggt tggccgtcga acaatctgta
    48721 aaagttaacc atcactaggc cgctgagtta gcggcttttt tcatttgctg gagctacatc
    48781 aatggatcag aaattttttc gcgtgccgtt tgcgcagagc ggcgatcgcc aaaccattcc
    48841 agacgcaaca caaagtagcg gcgctgtatc gttccccagc ggctggggag ttgattacgc
    48901 aaaagaccct actgtagacg cgaacgcaaa accggttgag cgcgaggcaa tgaatgcgat
    48961 tctattcgcc atcactaacg ctgtgcgcca gtatcaaacg tttggttttc ccgaatacat
    49021 cacgccagca gacaacaacg gcggggcgtt ttcgtacagc tccggcgctg ttattcgcta
    49081 ccgcgcagta gcagaccaac cgtttaaatc gtatgtatcg attgctgaca acaacacgtc
    49141 tgtgccaggc tctgacgaaa cgaaatggca ggagttcata tatcgggagg cgacgactca
    49201 ggaaatcaca gagggtacga gcggaacgac agtggtatcg ccgcgccgac tcaaggagcg
    49261 aacggatatt atcgacgatg agatagacga tattaacgac tcgctgactc gagtcggtaa
    49321 cctgcaagtc gcgcaagtga atatcgacgc tcagggctcg gtagtgctga atgcccctac
    49381 tgattgcgtg caaatcctga tcatcggcca ctacaccgct gacggcgtag agagtcgtga
    49441 cttttgggag agtaaactct ctgttaatgg cgtactcgtt gatacgacgc cgttttacgg
    49501 gttcgttacg gggtcgcgcg ggcatgggca tcatcgccgc gaattgctgc cgttcagtca
    49561 gttagttgat atgcagctca ctgcggggga tgccataaat ttcgagtaca ccagtaacag
    49621 aggtggcagc agcacaacat ttacggtgtt ctacattcag ggcgtcagca ctgataaacc
    49681 ggatgtgccg tctgcaataa tcacctcccc ttcaagtagc acaataaacg caggtggaca
    49741 gcagcaactg gctgcgactg ttttacccgc taacgtggct gctgattacc ctgttacgtg
    49801 gtcagtatca gatccagcgc tagggagcgt cgatagcaac ggcctgtata cagcaaatag
    49861 cggcgtcagc ggaacgcaga gtgtgattgc cagcgtatcg accggattag cctccacagc
    49921 gacgataacg cagcatattt acctgacgag tatcgatatc ggtaacgccc cgccaaatct
    49981 gatcgctgac agaacataca ccgtcccgat cacgtatagc ccatctaact acacggagtc
    50041 tgtgcaaacg tcatcgtccg attcaacgat agcgacgcta tcgatagatg gcacgttaac
    50101 gatcagctca ggcggtaccg caacgctcac gctcacaggt gccagctctg gcgttactga
    50161 ctcgataacg atcacggcga ctgaggaggt tgtgccagag cgctatttgc agattgataa
    50221 caatttgtct gagattgccg ccgctggcgc gacagatcag gccgcagcgc gtaataattt
    50281 ggggctgggt gggctggcaa caaaagacgg gctcacggct gctgacgttg gtgctgttcc
    50341 gcaggccggc gcatcactcg gaaatgacaa cctgaacacg gtcacgtcac caggtcgtaa
    50401 attccagtcg ctgaccagta acgcaacact ggcgagaaat tacccggtgg cgcttgctgg
    50461 catgcttgac gtcatcagaa cgactgacgc aggaattcgc caggcatact atccgtacaa
    50521 caacacagac gtttatcacc gctactgcgt tgacgtgggt gcgaatccta tcgtgtttgg
    50581 cggttgggct aggctgggtg gtgacttctt ggaaaaatct caggatctgg ctgatgtggt
    50641 gaataaatct gacgctcggg aaaatttggg agtggggtac acgatatcga cagcagcccc
    50701 tccggccagc gcaacgggtt acggtcaggg gcatatttgg tatcaggtcg aggaataatt
    50761 atgccaatat tccgtgaatc cgaaggggcg ttttcccctg ttaaacgcct cgatattaat
    50821 gatttcgggg tgattaaacg cgtggccgcc gcatggattg ttgatgatgg cgtattcaaa
    50881 aaactgtttc caactgaacc tgttgatatc gcagattctg atatttttga tgctgataat
    50941 tctgttaaac gctggtctgg aatgacagtt tcggcacaaa aatattggat gatggaaatt
    51001 agcattccgg ttgttgatgc cgctgcgttc gggcaattca catcgagcaa tatcattgtg
    51061 acacgcagcg gaaacgcaca acctgttcag ctgcgggcag ataatattac gtggataaca
    51121 gagcgtcctg atggcacagt gcaaaacgca ctctcgccgc cgctgaatgc atcgacgccg
    51181 atcaggatag gctggcgcaa tgatgcacga tggataacca ttccgtacaa cgccggaata
    51241 gtcggctctg taacaaacat caggatagaa atcgtcgcat ctggcacgct gtatttttac
    51301 gacacgtcag caacactgat tgcgatttga ttacgcaaaa aatgaaagac gcccagcgat
    51361 aatatccaaa gcatcttcaa gcgtcggaac tggatcgata tgaatcgctg gcgcgtcagt
    51421 ttcgccgacg cgtacagcga catagcagcc agaatcttct attactgcgt atgagccgac
    51481 agggcaatca gtcagcatgt cgctgtcgtc gagtacgcag attgtcgttc cgttatagtt
    51541 aactacttcc atcttttaca cccgaaattt tcccgtccat gtccgaaaaa tatagcatgt
    51601 gtttgattta aaaggatagg aaaggacggt gtttttgatt ggtttttaat cggtttgttt
    51661 ggtttaattg ttatttttca gttggttgta tattttatgg cgactaaagg aatcgtactc
    51721 ggtctttttt ttgatttaaa aatcgattaa taaaattatg ccctcatctg ctatgccttg
    51781 gtttatcctt cacttcagtg atcgtacatg aaacagcgtg ggttgattcc tgtttggtgg
    51841 ggattggttg acgaatctat tgctaatgaa cgtgtggagt gaggcggatt tcttgtcagt
    51901 ccggctttta aagactttta agaataaatg cttgctaaag attgttatac atgcgttaat
    51961 aggtggtcgg tttgattcgc agacctaaaa agcagtttag taaagcagtt ctcatttcaa
    52021 agtgttatcc atagatatcc cttctttttg agcctcctta tcgttgctaa ttaaattctg
    52081 tgcacaggcc ctatttgccg gaaggcgcta taaaattaag gtaatttcta tgtctaataa
    52141 aatgactggt ttagtaaaat ggtttgacgc tggtaaaggt tttggtttca ttactcctga
    52201 caacggcagc aaagatgtat tcgtacattt ctctgcaatt cagagcaacg atttcaaaac
    52261 tctggacgaa ggccaaaagg ttgaattcac cattgaaaat ggtcagaaag gcccatcagc
    52321 tggcaatgtt gtcgcactgt aa
//
