# Supplementary material for: May the Phage be With You? Prophage-Like Elements in the Genomes of Soft Rot Pectobacteriaceae: Pectobacterium spp. and Dickeya spp
Source: Front Microbiol. 2019 Feb 14;10:138. doi: 10.3389/fmicb.2019.00138 (PMC6385640; doi:10.3389/fmicb.2019.00138)
Supplement: Supplementary file 2 [file Data_Sheet_2.ZIP › Supplementary_prophagesGENBANK_files/Genbank FILES _SRP_prophages/phiPc2.gb]

LOCUS       Exported               38618 bp ds-DNA     linear   UNK 02-AUG-2018
DEFINITION  phiPc2.
ACCESSION   .
VERSION     .
KEYWORDS    .
SOURCE      phiPc2
  ORGANISM  phiPc2
REFERENCE   1  (bases 1 to 38618)
  AUTHORS   .
  TITLE     Direct Submission
  JOURNAL   Exported Aug 2, 2018 from SnapGene Viewer 4.2.3
            http://www.snapgene.com
FEATURES             Location/Qualifiers
     source          1..38618
                     /organism="prophage phiPc2"
                     /mol_type="genomic DNA"
                     /note="/genome_id=6666666.356835"
                     /note="/genome_md5="
                     /note="/project=robertczajkowski_6666666"
                     /db_xref="taxon:6666666"
     CDS             1..2652
                     /codon_start=1
                     /product="hypothetical protein"
                     /label=hypothetical protein
                     /db_xref="SEED:fig|6666666.356835.peg.1"
                     /translation="MELKDYQNGVLDKLDYYLKTLSESKEEAEDFVAFQKMKGKDARIN
                     DYAKDAWEQLVQERRIDLLKDKSGHFVPAPYVSRFDGLEQPIPNVCLKVPTGGGKTLLG
                     VAAIERLQTDLFTQQTGMVLWVVPSDAIYKQTWKQLANREHPYRQMLERASGGRVKMLE
                     KNDAFTKRDIDENLCVMLLMLQSSARQSKETLRMFRDSGRFTTFFPIEDDTTANEALLT
                     QIRNLDCNDLSDYGWQEGIAPGSVSVKQSLGNVLRLVRPVIIIDEGHKAYSDTARDTLC
                     GFNPKFILELSATPNANGKHHSNVLVNVSGQALKDEQMIKLPINLINEDKSEWKHTLLL
                     AHSKLSELDRDAQQFQNETGRYIRPIMLIRVERTGKDQRDSAFVHAEDAREYLMDKLGV
                     NENEIRLKTSDKDELGDDDLLSDMCPVKYIITKDALREGWDCPFAYVLTVLSKMTARTA
                     ITQMIGRVLRQPHARLTQKPSLDECYVYTFDQDVMNAVAGVKEGLEEEGMGDVANQVKA
                     SEANKPATAVNKEILLLRERFRSLPKVFLPRVLHRDNRCEDGYRLFDYERDILGDIDWE
                     SLLYLNVDNFQLVNDKLQRTIARIDYKMSKDNQGELDLADPVQENIEFDANVGLDISYM
                     VRQLTDVIPNPWQAMRVLTHTLDILRDNGVSEESLFTNRLELLKEMKRDIKQQVVQLSE
                     QIFRIKLDKGDISLRLLASDNDKLNWELAQTLEVNVTEHEQVLRRKDGSELERSLFEKV
                     YQNGLNSLERETAWYLDKQESVYWWHRIAVNQREYSLQGWQKQKVYPDLLVCVEEPSSG
                     NYRFSVLETKGEHLKGNDDTEYKRRLFELLTEHVKTAVDAGELTLEAASGGISFRMLME
                     NSWSQEIVHELN"
     CDS             complement(3383..4642)
                     /codon_start=1
                     /product="Integrase"
                     /label=Integrase
                     /db_xref="SEED:fig|6666666.356835.peg.2"
                     /translation="MALTDIKVRSAKPEEKEYSLTDGDGMFLLVHPNGSKYWRLRFRFG
                     GKQHLMALGVYPEVSLSEARQKRDEARKQVAAGIDPREHKKAVKAKQEEDEKTFEVVAR
                     AWHADNKKWSESHGERILKSLSDNIFPAIGSTHIADLKTRDLLAPIKSVERSGRLEVAK
                     RLKQRVTAIMTYAVQNGLIDYNPAQDMAGAIMPGKVEHRPALALERLPELLGRIDGYKG
                     REFTKWVINLSLLIFIRSSELRFARWPEIDFERALWTIPPEREPIPGVKFSERGSKMHT
                     PHLVPLSRQALEILKKIREVSGHCELVFIGDHSSRKPVSEGTVNKALQTMGYDTKTEVC
                     GHGFRTMACSSLIESGLWSRDAVERQMSHQERNGVRAAYIHKAEHLDERRLMLQWWADF
                     LDANRERAVSPFEFGKLTTV"
     CDS             4793..4933
                     /codon_start=1
                     /product="hypothetical protein"
                     /label=hypothetical protein
                     /db_xref="SEED:fig|6666666.356835.peg.3"
                     /translation="MGFRQKNRRRLTSIDLSMVPGAGLEPAQRERRGILKSYTTLNKTI
                     G"
     CDS             complement(5027..6034)
                     /codon_start=1
                     /product="Phage integrase"
                     /label=Phage integrase
                     /db_xref="SEED:fig|6666666.356835.peg.4"
                     /translation="MAVSKLSSGKWLCQCFPYGRDGKRIRKQFSTRGEALSYERRLMAD
                     KKGIDTTTSNITLKDLVQRWYDMHGKTLSSGDSRYTKLLAICERLGDPFAIDVDKNMFA
                     VYRERRLKGEWNPKGKAVLKEATVNREYSYLRAVFSELKRMGEWDKENPLDGIRQFKEG
                     DQELAFLYPEEIKRLLAACDESDNKDLGIIVRLCLATGARWSEAQDLKQSQILPNRVTF
                     TKTKGNKNRTVPISEKMRSLLPKKRGALFTPAYESFKYAIKRAGIELPSGQLTHVLRHS
                     FASHFMMNGGNILVLQQILGHSTITMTMRYAHFAPDHLDAAVTLNPFDSLEIDK"
     CDS             complement(6038..6373)
                     /codon_start=1
                     /product="hypothetical protein"
                     /label=hypothetical protein
                     /db_xref="SEED:fig|6666666.356835.peg.5"
                     /translation="MNKDNNNKVVQLRDAPLPFADRMKESDNGGSGGDGMDELLKRVAK
                     AEDSIAQIKVDLAKLSVRSEEFATKSDLQKEMSSIHKEISAQTKWIAATIIGTAGIALA
                     VARFLFV"
     CDS             complement(6366..6815)
                     /codon_start=1
                     /product="hypothetical protein"
                     /label=hypothetical protein
                     /db_xref="SEED:fig|6666666.356835.peg.6"
                     /translation="MTDNNRSPLELDEIFATQTLKRERAEEKLKERLMKVTPKLFAEFL
                     SAKGAAQHCLSCGSSALSVPESGSLGSADLPENASELSPEELVKSINVLVTRYVTYRYV
                     DPTAYPRPSNCEYRVSCINCGHVSFYRVYPVLKWIENSDKEADDE"
     CDS             complement(6844..7491)
                     /codon_start=1
                     /product="hypothetical protein"
                     /label=hypothetical protein
                     /db_xref="SEED:fig|6666666.356835.peg.7"
                     /translation="MNKKYLLTAMSFLLCSGSFAAELNLSNDEILACKSIGDSKQRLAC
                     FDKVDKKADAPVSQKNDANDDSNPTGDVGKWVINKEQSSLDDSWNAYVYLEAEEPIRGA
                     FGQPIVPTLFLTCREGKTDLYVGWDSYLGLNETQMTYRIDSKKAVTKSWTISTNNKSAF
                     YAGKTISFIKELMSGKSFYTTVIPYGESPVAARFDLVGLSEAIKPLRGACKW"
     CDS             complement(7540..8142)
                     /codon_start=1
                     /product="hypothetical protein"
                     /label=hypothetical protein
                     /db_xref="SEED:fig|6666666.356835.peg.8"
                     /translation="MTVEAQGDNNRVAGRDYYEKNINIAAPESKEDLRPLVSAQRSQLN
                     QLVKDIAEAGREDVRFVWRRLHAELGVNGIEEITISQYSTALSFLNALHDRSREKDANK
                     KLVSQLLRSTQQNELREQLTRFCHINFGTSRLIDLTRPQLQQAMGWLDERQGRPTPNAS
                     PPKVQTWQDAVNTLKAEPRIFGAVLAAGIVLGMLLAH"
     CDS             complement(8165..8578)
                     /codon_start=1
                     /product="Transcriptional regulator"
                     /label=Transcriptional regulator
                     /db_xref="SEED:fig|6666666.356835.peg.9"
                     /translation="MSTSKEEFLFLIGGRLREERETIGKSQSAIAEELGTTTRTWGKYE
                     RGETAPDGATLAFLSENYGMDTLYILTGKRTPDLGDISNDELELIKIYRAAPLAIKAAA
                     LAALTAGSSATASINVTGSGQRVAGRDYHEGKK"
     CDS             8639..8833
                     /codon_start=1
                     /product="hypothetical protein"
                     /label=hypothetical protein
                     /db_xref="SEED:fig|6666666.356835.peg.10"
                     /translation="MTQENHDQRSRLPRGIASKNPTPMRLSDDERNKLAALAAQESRSL
                     SSMARLVFLRGLESFNAQG"
     CDS             8845..9057
                     /codon_start=1
                     /product="hypothetical protein"
                     /label=hypothetical protein
                     /db_xref="SEED:fig|6666666.356835.peg.11"
                     /translation="MAKALNINITVPTPYVSLKTYSEMTGIPLRTCEGMVSDGRIIIRP
                     KKARMEKVEVNLIAMLRDAITNSEI"
     CDS             9060..9311
                     /codon_start=1
                     /product="hypothetical protein"
                     /label=hypothetical protein
                     /db_xref="SEED:fig|6666666.356835.peg.12"
                     /translation="MTEIKTNSNAKKFINIKGEGNTGCCIPYDEIKTIEDVGPSKRSRY
                     SNGETLIKLIDGERITVNIPYEKVIKQLKKLPEFEILG"
     CDS             9327..9545
                     /codon_start=1
                     /product="hypothetical protein"
                     /label=hypothetical protein
                     /db_xref="SEED:fig|6666666.356835.peg.13"
                     /translation="MLVFSGIDHALIKVSEHTSVYRGFSITRCPRTATNPITRYRVSQG
                     DQSFGLFDALVQATCYINELHGMRNSA"
     CDS             9542..9739
                     /codon_start=1
                     /product="hypothetical protein"
                     /label=hypothetical protein
                     /db_xref="SEED:fig|6666666.356835.peg.14"
                     /translation="MISIARLLKEKSPSPQDNKGWLELPNGQRFQPTPEQAYFAPWSKK
                     PYMPAPKKRRWFARLMGIAA"
     CDS             9745..10080
                     /codon_start=1
                     /product="Phage protein"
                     /label=Phage protein
                     /db_xref="SEED:fig|6666666.356835.peg.15"
                     /translation="MANTEAARAVPLSIAARTDGLNHIAMLRGKHFNTNSEKDMCRFID
                     DMRDKIDDDYHQNMRVLSAIFELADIDKERHNMKFNELTTEEKAKLIKAMNKLKAVVSL
                     FPKHLTL"
     CDS             10151..10384
                     /codon_start=1
                     /product="Phage protein"
                     /label=Phage protein
                     /db_xref="SEED:fig|6666666.356835.peg.16"
                     /translation="MRNAEVKQMQVASDNALVELLNKARQEERKDQHLGFSLRLAALSI
                     HAQKKEYSAAEVIELLRKEAERFEHSSQEIIA"
     CDS             10381..11082
                     /codon_start=1
                     /product="Exodeoxyribonuclease VIII (EC 3.1.11.-)"
                     /label=Exodeoxyribonuclease VIII
                     /db_xref="SEED:fig|6666666.356835.peg.17"
                     /translation="MNHVMIDIETMGTNPNAPIASIGAVFFNPKTGELGEQFYCRVDFE
                     NDMLNGAVPDGGTIKWWLRQSSEARAELICDDADATIIFRAVSDLSDWLTDNADNLKSL
                     KVWANSPSFDLVIMKSKFERLGFDIPWKYWNEQDVRTIKEVGRALGVDARPFTGTQHNA
                     LHDAINQAALVAAVMSRLVANKPEKSCGFGWIDWNELSYRGLLARINQEIMHPLGPAVF
                     RDQETGDQAVH"
     CDS             11228..12232
                     /codon_start=1
                     /product="Methyl-directed repair DNA adenine methylase (EC 
                     2.1.1.72)"
                     /EC_number="2.1.1.72"
                     /label=Methyl-directed repair DNA adenine methylase
                     /db_xref="SEED:fig|6666666.356835.peg.18"
                     /db_xref="GO:0009007"
                     /translation="MSLRAGDKREGAEMIRPFIKWAGGKTRVLPDLLPLLPKGDVLIEP
                     FVGGASVFLNTDFRHYVLADINADLINMYSVAKNQTDDFLDAVLLMFKNGNSKEAYLET
                     RELFNWANRNDTRLSYSSSFKLLQAARFLYLNRHGYNGMCRYNKNGEFNIPHGKYKTQY
                     LPFVEIKQFAEKANDTKALFVVADFCETLTSQAISESSVIYCDPPYLPASDTANFTQYH
                     HAAFTIDHHRDLAAQLLNLNRSRGVPVVISNSDTPATREIYQHYQFHEIAVQRSISANG
                     ITRGAAKEVIGVLKTCDGCGRAGGGCCPDCGPCMGDATYQEMVASGAFDGGAF"
     CDS             12233..14743
                     /codon_start=1
                     /product="Phage replication protein # Replication gene A 
                     protein"
                     /label=Phage replication protein # Replication gene A
                     /db_xref="SEED:fig|6666666.356835.peg.19"
                     /translation="MPEQWAYPWNAPRPAISIPHEIADSFPPSATNATEPHPAVEQHLK
                     RLVSRTAFSDLDFDHAVARLDYFEPNATLLTMRRQFAEAERDEHHAMLQHWMETPEGVE
                     GRLLEQPFFIRDTYRQKIEWLRANREPRHVSAFFMGTVKKALLRLDAVRAKQGVRDGFT
                     SELASYWRARWQHLAEFTKHEAINAGHAIAASIAEMFETECGSTLPADMTNDEIQALFW
                     HLGREMLALRITPPCWGVIIGDDESKKRICSAILRIISPEWWGRKLWRLRCEWRENQFR
                     AIGVIHKKRMPYVSIDALNQWQEQRRKNREFFKAHELVDEDGNVASLENMVYASISNPV
                     IRRHELMTRMAGVEMVAISRGDGGVFLTITCPSRYHATIQNGHHNPKWDTSSPRQAQRY
                     LCKTWAKAMSKLNRRGLRPYGFRVAEPHHDATPHWHVLLFMPPEDRKEITEILREYFIA
                     LDRAELGRNTGARFKAKRLDPKKGSATAYVAKYISKNIDGYALDGERDNETGKPLRETA
                     KFAMAWASQHNIRQFQPFGLPPVTVWRELRKLANQLTAVQKEAGTFKRGASQLADPAMD
                     AVLASADVGCFATYIEKQGGVLIPRELYTVRIAYEAADEQNDYGETPEKIFGVFSPRLG
                     ELSRICTRLVKWKIRKKQTVDAGANDSAGRGLAVTSPTGDAWSSVNNSTGDEKIVKNEP
                     LDRDIGSTSEQEIIDFEHMIDTERRGLLNRLRSQPPDRRHKEHSSTTQPHKENEKQTVS
                     KRSDDWRASVADFARSMGWDISAGELRRLEAGNAITIAGHAYIASGDGCLYRAPMKKKK
                     DVEYQDRAATLLQRIAALREVSQS"
     CDS             complement(14853..15905)
                     /codon_start=1
                     /product="hypothetical protein"
                     /label=hypothetical protein
                     /db_xref="SEED:fig|6666666.356835.peg.20"
                     /translation="MIHTNQTRISVVQYKIKSIYNKNNLSVNNGFEYSFSYLVRKISYL
                     QRAVNDNSKDSIKVQLIKSLSWLFSLANLEKIDIENSFIRKYPTLCPYCVSSSCVCGVT
                     DKSPVDGSYYEKAKDNLVSNYHSVINSGQVISLEKALLIITKIYPANALIWKTHGVFFV
                     FSKLLEEVGEIHEAYSRLKKPHGVENKEKLMKNLEEEFADVFVWLMSVWFVTQGKENIT
                     ASFDSYYEMGCPVCCMMECECNTYSDRKPIDDEKESLISLKEGLEKLRGEIKDKSGEAN
                     LIIEKTLSSITVALDEDTNLSVKSVIADTKTKFEKLSDVVERTENMSSNGIKIFENIAK
                     MIGNISQLAS"
     CDS             complement(16412..17479)
                     /codon_start=1
                     /product="Presumed portal vertex protein"
                     /label=Presumed portal vertex protein
                     /db_xref="SEED:fig|6666666.356835.peg.21"
                     /translation="MSRKKQHPRTANLRAPAAQTPVTGELIQQPIESLQSFSFGDAQPI
                     MDRRDLLDCMECARNGRWYEPPISTYGLARMFDVAVHHQSPILFKRNVIMSCYESHPLL
                     SRQDANAFVLDFLVFGNAYLELRKNRFGQPLKLKHTHAKYTRRGENLDQYWFVTYYAND
                     HEFEPGSVFHVKSPSIHQEIYGTPEYMAVIQSAMLNGEATLFRRNYYINGSHAGVIVYL
                     TDPITNNADVEQLKKSLKDARGGGAFKNLFVYAAGGKKDGLQILPFSQIAAKDEFTGIK
                     DATRDDMLAAHRVPPNLMGIMPNNAGGFGDVEKAAKVFAINELMPIMESLKELNDWLGI
                     EVLRFKPYALAEGAM"
     CDS             complement(17482..19194)
                     /codon_start=1
                     /product="Phage terminase, ATPase subunit"
                     /label=Phage terminase, ATPase subunit
                     /db_xref="SEED:fig|6666666.356835.peg.22"
                     /translation="MNLLPDIRTEAKSLYWQAYSIPQIAQRLGVSNNTLYSWRRRDKWD
                     DSTPIQRAQERTEVRYLRLIEKEDLTPHDFKTIDLLGRQMARFSRDERKDQEKEARKKA
                     PKNHFTDEQIAALRALILESLYEHQKRWYKKRKQRNRAILKSRQIGASWYFAREALLDA
                     LETGTNQIFLSASRAQAYQFKRFIQLLASSIGVELKGGDAIVLSNGATLYFLGTSAATA
                     QSYTGNLYFDEFFWVSNFLNLRKVAAGMATQKGLRRTYFSTPSSEEHGAYTFWTGDFFN
                     KSRPKAERVEIDVTHKVLKKGLLCGDNIWRQIVTIHDTLEQGFDLVDLDEIKSENSPDD
                     FENLYACRFVSVGERAFDYTALINCGVDGYNDDVWPDWRPYTQRPLGHRPVWIGYDPSG
                     DSGTGDSAGLSIVSPPAVPGGKFRVIEVRQLRGMTFEKQAEVIKELTHQYNVQFIGIDS
                     TGNGSAVHQLVVKFFPAAVKYQYSPSVKRELVLKAQMLIRAGRFEYDAGMMELARSFMT
                     VRKFVTQGGMTSYASDRTKGSSHGDIAWATMHALHNEPIGSESGGNDGFIQEF"
     CDS             19341..20186
                     /codon_start=1
                     /product="Phage capsid scaffolding protein # Fam Scf032"
                     /label=Phage capsid scaffolding protein # Fam Scf032
                     /db_xref="SEED:fig|6666666.356835.peg.23"
                     /translation="MPISKPFLAAVEGATCDGRTLERAHISQMAKNFNKQVRGARVNLE
                     HIRGYSPTSDFRAYGDVEEVSEFEIQDGPLKGKLALQIKIDATDDLVALNTKRQKIYPS
                     IEIHPSFADTGEAYLMGLGMTDDPASLGVGILEFNAKCGGKGPLDGRKTSPECFFTAAD
                     TPITLEFEDDAPNGDAGRNFFSRITELLTGSQQRFSKENGELKQAVELIAKSQRELLDK
                     TETFSALQAQNTELKGNVEMLNKSLTELKEQLAGQDGNFSQRPPASGGNQQSNVVLADC
                     "
     CDS             20221..21270
                     /codon_start=1
                     /product="Phage major capsid protein #Fam0066"
                     /label=Phage major capsid protein #Fam0066
                     /db_xref="SEED:fig|6666666.356835.peg.24"
                     /translation="MQNETRVLFDAYINRQAELNGIQPAHVTTQFSIAPSVQQELEDKI
                     QQSSELLQKINITGVSEQEGQKLGLGISGPVSSSSTSSTERREPKSVHTLDDDKYRCEQ
                     TNTDTFISYPQLDVWAKFPDFQQRISNQIIKRKALDRIMIGFNGTSRAAKSDLANNPLL
                     QDVNIGWLEKYRLHASQRVMKNITVTSRDDENKVIAKGDYGNLDAVVYDATNSLLDEWF
                     KSSQDLVVICGRQIMVSKEYPLINAINTTNPNSEALAGQLLVSRKAIGNLPTFIAPFFP
                     DGSMFITPFSNLSIYFQDGKQRRAVRDEMEFNRVATYESSNDAYVIEDYGTGCLIEGIT
                     FAAAAPAKG"
     CDS             21322..22116
                     /codon_start=1
                     /product="Phage terminase, endonuclease subunit"
                     /label=Phage terminase, endonuclease subunit
                     /db_xref="SEED:fig|6666666.356835.peg.25"
                     /translation="MLTPAQRHFQTVMAQRHGKSNGGDVERTAYEQQLHRLRMDKSRLS
                     QVQSATTKAELKRELLPDYQGWVNGVLAADSGQADEVLTTIMIWSIDAGLISDALRIAG
                     YVLRHRLPMPDQYKRTVATTLVDEICDPALAAFKADTNMVPLSADLLLQLERLTASEDM
                     PDQVRAKLYKTLGYTLRLDTKELSAARDWLQRAVTLFDGIGVKRDIELLGRALKKATEP
                     EEENTDAPPPADKPAVKATRAPRKSTAKASRTTTPRARKSAS"
     CDS             22213..22719
                     /codon_start=1
                     /product="Phage head completion-stabilization protein"
                     /label=Phage head completion-stabilization protein
                     /db_xref="SEED:fig|6666666.356835.peg.26"
                     /translation="MSLIATEPVRPATQDTINDGDAKVMSHAFWPVIVLSALRRAMRLD
                     GQVTTDRLMDKAIEAVAHVNDQLSDWRSGQAQRGFAVLSEVKPDSAGELDQINGESVLV
                     WRYRRAVYSITKALLIEGYRDIDTTREGEKHAEALSSQIDTLWRDGRWAIRDILGVNRG
                     LAELV"
     CDS             22719..22922
                     /codon_start=1
                     /product="Phage tail X"
                     /label=Phage tail X
                     /db_xref="SEED:fig|6666666.356835.peg.27"
                     /translation="MEVRAQQNDTVDLLCWRYYGRTDGVTEGVYAANLGLCERGPLLPA
                     GLLVTLPDVTAATQQEIIQLWD"
     CDS             22913..23215
                     /codon_start=1
                     /product="hypothetical protein"
                     /label=hypothetical protein
                     /db_xref="SEED:fig|6666666.356835.peg.28"
                     /translation="MGLTTDRVASAITYLLATLIATAGRMTLSDWATLIGIAIGLLTFW
                     VNRNHKKNIERDQAQRTDLMRELVRKVDHENLPETLDALRVMNGQETGRRGRDAT"
     CDS             23205..23681
                     /codon_start=1
                     /product="Lysozyme (EC 3.2.1.17)"
                     /EC_number="3.2.1.17"
                     /label=Lysozyme
                     /db_xref="SEED:fig|6666666.356835.peg.29"
                     /translation="MLPEALKQRIIPVVTACALAIATVFVGFFEGKENTAYRDIAGVWT
                     ICYGHTGDVKAGDYKTDAECDALLQQDLKPAFHAIDRLVTVPLSELQRAALASFIYNVG
                     TGAFERSTLLKKLNRGDLIGACNELRRWNKAAGQVWQGLTNRREAERMLCLEKL"
     CDS             23663..24088
                     /codon_start=1
                     /product="hypothetical protein"
                     /label=hypothetical protein
                     /db_xref="SEED:fig|6666666.356835.peg.30"
                     /translation="MSGKVIATLAATLLFLAAIVLAEHYRQKSQRLSGEITTLIAERDS
                     AERVINNQQRTFQIFNTLSREAEHDKRQIQQDADTRSQTINQALAGQVCANEFVPDGAA
                     VQLLDYANRLRADSLRSPASEPNRTDGNTAAAGRDSQ"
     CDS             24205..24693
                     /codon_start=1
                     /product="Phage tail protein # FIG072132 and FIG003673"
                     /label=Phage tail protein # FIG072132 and FIG003673
                     /db_xref="SEED:fig|6666666.356835.peg.31"
                     /translation="MLKAELLRKAISEQVPWLRENPDQLVVYVQKGNAISTGARSASFE
                     YRYTLEVLAMDYPHSIDTLMVPVLMWARIYQPDLLLNPERRKTGITFEADLLSNSTADL
                     LIRIQADEAVIVTRNEAGEINARHRTDPPPDPMEGQDAWGLLVKDDVASTVIHDATAG"
     CDS             24696..25334
                     /codon_start=1
                     /product="Phage tail completion protein"
                     /label=Phage tail completion protein
                     /db_xref="SEED:fig|6666666.356835.peg.32"
                     /translation="MSQNDALFQELDGYLKSVVEQLAANQRRRLSRQIATGLRKRQQQR
                     IAQQQNPDGSSYEGRKRQARRIQGGVRFMWKSEVRELRNWHSSKGRSGERMITGFDVGR
                     GGLRSFLRADIDRYLSINVSSVSTAPARKETMFRKLRTVRFLRIDTSPNSAAVGFSGHA
                     ASIARVHQFGEADKIGRSSVRYPIRELLGLTPTDLDWVADTITDFIQPD"
     CDS             25425..25949
                     /codon_start=1
                     /product="Phage baseplate assembly protein V"
                     /label=Phage baseplate assembly protein V
                     /db_xref="SEED:fig|6666666.356835.peg.33"
                     /translation="MTSNEFDRLLHNLIRIGTVVDVDHVRHLARVETGGNTTDWIRWGV
                     ARAGDATSWWPLSVGEQVLIAAPGGDLATAVIVLSLYSSQHGAPSNTPKVHTTVYPDGA
                     SETYDANTSTMTVKGVKKVIVEAAESITLDTPKVICTQHLSTQTLSVEKGGTMRVISPT
                     PAAKCHQMAWS"
     CDS             26005..26361
                     /codon_start=1
                     /product="Phage baseplate assembly protein W"
                     /label=Phage baseplate assembly protein W
                     /db_xref="SEED:fig|6666666.356835.peg.34"
                     /translation="MSNEKYIGMNASNGRAITDDEHISQSVRDILLTPVGSRLMRRSYG
                     SQLFSLIDEPHEPAIKLKITSAIYSALMRWEPRITPTKITLETRGAGLVAVTLQAQRTD
                     NLAAFSATISLQGT"
     CDS             26361..27272
                     /codon_start=1
                     /product="Phage baseplate assembly protein J"
                     /label=Phage baseplate assembly protein J
                     /db_xref="SEED:fig|6666666.356835.peg.35"
                     /translation="MSGLIDLSLLPAPDVVETLDYETLYAERKAMFIALFPVEQRDAIT
                     RTLALESEPLTKLLQLSVYHELLLRQRVNEAASANMLAYAAGSDLDLLAANVNVQRLVI
                     TAEDTEAIPPIEAVMESDADLRTRAQQAFEGLSVAGPTAAYEFHARSADGRVADASAVS
                     PSPAAVTVTVLSREGNGSASDELLQAVAAALNAENVRPVADRVTVQSANIIPYEIAAAL
                     YVYPGPEAEPIRIAAETRLQTYITAQHRLGRDIRRSAIFAALHVEGVQRVDLESPAADI
                     VLDKSQASYCANWVLNIGGSDE"
     CDS             27265..27873
                     /codon_start=1
                     /product="Tail protein I"
                     /label=Tail protein I
                     /db_xref="SEED:fig|6666666.356835.peg.36"
                     /translation="MNNSLLPVGSSELEIAAAKACAELSRTPIPLRQLCDPESCPSNLL
                     PYLAWAFSVDRWDEKWPAVIKRQAIKSAYFIHRHKGTVGALRRVVEPFGYLIRIIEWWQ
                     NGGEPGTFRLDIGVQDSGITEEVFNELERLIADAKPVSRHLLGLNINLDTQGAAYVSAT
                     SYSGDTLTVYPYFPETITASGLDVVGAGVHLIDTMRVTQ"
     CDS             27870..29729
                     /codon_start=1
                     /product="Tail fiber protein"
                     /label=Tail fiber protein
                     /db_xref="SEED:fig|6666666.356835.peg.37"
                     /translation="MSTKYFVLLTNIGAAKLANATVLGSHLDITHMAVGDGGGTLPTPN
                     PAQTALINEKRRAGINTLSIDPVNANQIIAEQVIPENEGGFWIREIGLFDAEGDLVAIG
                     NCAETYKPLLQEGSGRIQTVRMILIVSSTDAVTLKIDPAVVLATRGYVDNVIDAHEKNR
                     KHPDGTLNAKGFVQLSNATNSDSELLAATPKAVKAANDNANGRVPSGRKVNSKVLTADI
                     TLTAADVDAYTKAETDTRVAAATTAANNAATAAANANTNANGRVPSGRTVNGKALSADI
                     ALGAGDVGAYTKAETDTHVTAATTAANNAATAATNANTNANGRVPSGRTVNGKALSADI
                     VLTAGDVGALTAGGAAAAATKLATARKINGVAFDGTADISVDSEWSQIKNVPAASYDVA
                     GVVVLSSSINSNSRTIAATAQQLFTAHSIATNAQAKANAALPADGTAAAATKLATPRKI
                     NGVTFDGTTDINLPSDFPVGAPVPYPSATPPAGWIKCNGQSFNKSAYPQLATAYPSGVL
                     PDLRGEFVRGWDDGRGVDTGRGLLSAQSDAIRNITGEFQVVDRQNYVPSGAFSYSNRSG
                     AGISGNFVGVYHSDVSFDASRVVPTANENRPRNIAFNYIVRAA"
     CDS             29729..30370
                     /codon_start=1
                     /product="Tail fiber assembly protein"
                     /label=Tail fiber assembly protein
                     /db_xref="SEED:fig|6666666.356835.peg.38"
                     /translation="MSNYSTQIKNAELNDRGLAMNSGWITVYHVNPVTREYQSASYEYV
                     MQGVGLPADSYADEPQLPPVGKALSRSADGKAWEQVPDYRGQTVYNTETRQAQTVSQFG
                     ELPDNVTLLKPSSEFDAWNGKKWVIDKEVQAAAALKVAQQELATRKSAATSRINELTYA
                     VNLDIATDEEKAALTEWQKYAVLLSRVDVSATDIEWPTAPDAELIATADQ"
     CDS             complement(30526..30948)
                     /codon_start=1
                     /product="Phage-related tail protein"
                     /label=Phage-related tail protein
                     /db_xref="SEED:fig|6666666.356835.peg.39"
                     /translation="MMMILGMFVFMRQTAPYQSLSHDSSWRHVKNDRVGKSPRYQYIGA
                     GEDKITLAGELYPEITGGDVSLNMLQTMAYTGKAWPLIEGTGNIYGMYVITSINETRSE
                     FFNDGKARHISFTLNLERVSEDLREMLGDMDIGLPL"
     CDS             complement(30959..34060)
                     /codon_start=1
                     /product="Phage protein"
                     /label=Phage protein
                     /db_xref="SEED:fig|6666666.356835.peg.40"
                     /translation="MTDRNLNIRVAFSAINNMARPVSAARSGTAALADQIRATQNTLNG
                     LGRQASSFDRLSAASAKTTRELEQAKAKAAAMRAEFGAASARTDEQNAALKRQRELIRQ
                     LSTAQTNETEQLKQLRAELARHGVILDRSRRATDQISDQTARYNRMLAEQQRRLAAVTQ
                     ARARYDRMQQTAGNLRSTGAMAIGASAAGAYVGARMMAPNLQSDKSGAVIAAQNAEAPA
                     MGSQYSKIIKGINSAGVSNDLAQIASTVSAVRSSLGALGDVGEAELDRISRKALDMQSV
                     LGGDTAEHIQIAAIMMKNGLARSSDEAFDLMAAGMQRVSTQMRGELPEILHEYSTHFRN
                     MGYSGSEAMTLLVNMAQQGKFALDKTGDAVKEFSIRGSDMSKSSIAAYDAIGLNAQRAS
                     SAIASGGAQARNAMQQTAQGLLKIKDPAERANAAIALFGTPIEDLSIDQIPNFLSALAN
                     TKDQFSDVSGTAERMGSTLRDNLSGDIDKLGGALSGLRFAIFENDSGVLRKLAQGATAL
                     VNSVREWVTANPELAQTLLVVVGGALALTAAIGTVSLATGILMGPFSKLQLGLSLLSGG
                     KGIGTVTSMFSRLSGVMTGSLSSTRAWGGILTSIRSGIGGIGNIAQGAGRSLLMVFTQP
                     GAALSALGNGVRMLATSGFSALSGSGMAVFNILRTGFMLLLSPIGLIGAAIVAAGVLIY
                     KYWEPIKAFFSGYFSGLVAGLEPVKQSFSALSPIFDGIGQAISGVWDWFKKLFEPVNAS
                     SESLKQCTEAGKVFGEVVGMAISGVVTVILKVAEGIGWILEKLGVIPEAANAAVSASNA
                     MNGAIPQKGYESKKPVMYVWDKKQKKMVAQEWKPQPPKEADAVIKTGEAAKPPASEGNK
                     PKQTGVLQDLTGSNPKTEKTGSTAKTEEKKDPNKLGDIVFKNVPPAVMLANGYRESQVM
                     PAQPKIPLLERVKQTAGVLAASVLPFTVQPAGADVPAINSPAAQMKTAMSAGMASTDKY
                     EINITIQDARSLDEDKLVARLRREIDDIERRKQRRQRSQLTDHV"
     CDS             complement(34057..34173)
                     /codon_start=1
                     /product="hypothetical protein"
                     /label=hypothetical protein
                     /db_xref="SEED:fig|6666666.356835.peg.41"
                     /translation="MADIAAIFHWLPSAMDAMPVDELLAWRSRAAVRSGNSE"
     CDS             complement(34206..34517)
                     /codon_start=1
                     /product="putative phage tail protein"
                     /label=putative phage tail protein
                     /db_xref="SEED:fig|6666666.356835.peg.42"
                     /translation="MTEKQNNVVILQNPITRKGGDVKEVTITGALKQAGSLRGLKVYDV
                     MTSDVDSLLTLLPRVTSPALTKEELTAMDTWDFCQLSNAVATFLQPSSPASETGAVTA"
     CDS             complement(34533..35048)
                     /codon_start=1
                     /product="Major tail tube protein"
                     /label=Major tail tube protein
                     /db_xref="SEED:fig|6666666.356835.peg.43"
                     /translation="MSLPKKLKYFNLFIDGDNYFGQVPEVTPPKLTRKTEDYQAGGMPG
                     FVAIDFGFDAGALDMEITLGGLDAGLLKKWGVSTADGMQTRFAGSYQDEATGEAVPCEI
                     QTRGRFTELDPGSAKVGEDTAHKYTLKNTYFKLTISGEEVMEVDVLNMIYKVAGVDILE
                     KHRANVGL"
     CDS             complement(35059..36252)
                     /codon_start=1
                     /product="Major tail sheath protein"
                     /label=Major tail sheath protein
                     /db_xref="SEED:fig|6666666.356835.peg.44"
                     /translation="MATNYHHGVTVRETTDLSTIINDIDSAVIGVVCTADDADADTFPL
                     NEPVLLTRVASVLGKAGKTGTLHTTLKCISDQASPQTVVIRVADAANAPAEGNEPKPTQ
                     DQLVIGGSDANGRYTGLYALLSAEARIGVRPRVLAVPELDTQAVAAQLAVMAEKLNAFA
                     YVSAHDCATIAAAKTYRENFSQRELMVIWPDFIAYDTAKGESVIVPAPAFAVGLRAKID
                     AETGWHKVLSNVAVNGVLGLSKDVYFTLQGTDTDADELNSNGITTLIKQNGFRFWGSRT
                     CDRETYLFESYTRTAQILADTIAEAHFFYIDKPLTPSLAKDIVDGINRKLTALVTAGRL
                     LGANCWYDKETNTGETLRTGKLTIKYNYTPVPPLEHLDLVQEFTDEYFATFANTFSG"
     CDS             36409..37542
                     /codon_start=1
                     /product="Gene D protein"
                     /label=Gene D protein
                     /db_xref="SEED:fig|6666666.356835.peg.45"
                     /translation="MSIMDTLGAISGRLDEYSPRPAFMVRVGDKQVTELNDRLMSLSLT
                     DNRGFEADSLELVLDDADGKLALPERGAKVTVALGWANEPLISKGTFTVDEIAHRGPPD
                     QLTISARSADFRETFNVKREYSWHNVTVGFVVSAIASRYGLKAGVTERLSKLELDHADQ
                     TNESDISFLTRMAEMVGAITTIKNGMLLFIVPGQAVSQSGKPLPAITITRSSGDSHSFR
                     VADRDAYTGVTAYWLDLNFGKTKTTKVKNKRKTSTPAKKKEPASSSKEGNYLKGTEGNV
                     YVMRSTFKTEQAAKRAAAAKWSKLQRGAAEFSMTLARGRADLYPELHARMSGFKTVIDN
                     ADWIITRCVHEISQSGFTTSLEFEVKITDWAADDNDD"
     CDS             37535..37654
                     /codon_start=1
                     /product="hypothetical protein"
                     /label=hypothetical protein
                     /db_xref="SEED:fig|6666666.356835.peg.46"
                     /translation="MINATPVYNDSNTNRLRGCHGDQMSKVPRNCKNTYQRRT"
     CDS             37719..37835
                     /codon_start=1
                     /product="hypothetical protein"
                     /label=hypothetical protein
                     /db_xref="SEED:fig|6666666.356835.peg.47"
                     /translation="MTHIDEALNETKPAPGACVPTNIFPRSHKGENQLDLAL"
     CDS             complement(37887..38483)
                     /codon_start=1
                     /product="hypothetical protein"
                     /label=hypothetical protein
                     /db_xref="SEED:fig|6666666.356835.peg.48"
                     /translation="MGINSLDKIKCCLKGLCCLTPFCCGIYAATMYFIAGNIWSGLGSL
                     LTGIGISWGITISFMLGRLELNMNSLWFGLCTALGVIGVFAGSKVFDHRYIEVRQELTS
                     AFLNAPLHCNSDLSELMIKGAEHCSTQLLSDMMDFSSQMSKAIHLDPVSSLVDSTYSVG
                     QDKKVDRCLVDYVVLKKQCPNAFSMVEKKFPELLH"
     CDS             complement(38473..38592)
                     /codon_start=1
                     /product="hypothetical protein"
                     /label=hypothetical protein
                     /db_xref="SEED:fig|6666666.356835.peg.49"
                     /translation="MCNVVDRRKAVFLCLKKGKWQQDGSRVAAAFRMSSDNGH"
ORIGIN
        1 atggagttaa aagactatca aaatggtgtt ctggacaagc ttgattacta cctgaaaact
       61 ctgtcagaaa gtaaagaaga agcggaagat tttgttgcct ttcaaaaaat gaagggtaaa
      121 gacgcacgca taaacgacta cgccaaagac gcctgggaac agctagtaca ggaacgccga
      181 attgatttac ttaaagataa aagtggtcat tttgtgcctg cgccatatgt atcaaggttc
      241 gatggtttag aacagcctat ccctaatgta tgccttaaag taccgactgg tggtggtaaa
      301 actttattag gtgtggcggc gattgaacga ctgcaaactg acttatttac gcagcaaacg
      361 ggcatggtgc tttgggtggt gccgtcggac gccatataca agcaaacatg gaagcaatta
      421 gccaatcgtg agcatcctta tcggcaaatg ctagaacgtg cttctggtgg acgagtcaaa
      481 atgctcgaaa agaacgatgc gtttacaaag cgagacattg acgaaaatct ttgtgtaatg
      541 ctgttaatgc tgcaatccag tgcacgccaa tctaaagaaa cactccgtat gtttcgtgat
      601 agcggtcgat tcaccacctt tttccctatt gaggatgata cgacggctaa tgaagcatta
      661 ctgactcaaa ttcgcaattt agactgtaac gacctctctg attatggctg gcaggaaggc
      721 atcgcgccag gatctgtatc agtgaagcag agtttaggca atgtattacg gttagtccgt
      781 ccagtaatta tcattgacga aggtcataag gcatacagcg acacggctag agatacactt
      841 tgcggcttta atccgaagtt tattcttgaa ctatctgcta cccctaacgc aaacggcaaa
      901 caccattcga atgtattggt caacgtatcg gggcaagccc tgaaagatga gcaaatgatt
      961 aagttgccaa tcaacttaat taatgaagat aaaagtgagt ggaagcacac tttattgctc
     1021 gcacactcta agctgagtga acttgatcgc gatgctcagc agtttcagaa cgaaacaggt
     1081 cgttatattc gccctatcat gctgatccgt gtagagcgca caggtaaaga tcagcgtgat
     1141 tcggcttttg ttcatgctga agatgcgcgt gagtatctga tggataagtt gggcgtaaat
     1201 gaaaatgaaa tccgcctgaa aacgtcagac aaggacgagt taggtgatga tgatttgctc
     1261 agtgatatgt gccctgtgaa gtacatcatt acaaaagatg cattgcgtga aggctgggat
     1321 tgccccttcg cttatgtgtt gacagtatta tctaaaatga cagcgagaac tgcgattacg
     1381 caaatgattg gtcgggtact gcgccagccg catgcgcgtt taacgcaaaa accaagctta
     1441 gatgaatgtt atgtctacac ctttgatcaa gacgtaatga atgccgttgc gggtgttaag
     1501 gaaggtttag aagaagaagg tatgggagat gtggcaaatc aggtcaaagc ctctgaagct
     1561 aataaacctg ccacagctgt aaataaagaa attttattgc ttagagagcg tttccgctct
     1621 ttacctaaag tatttttacc gagagtttta catcgagata accgttgtga agacggctac
     1681 cgattattcg actacgagag agacatttta ggtgacatag attgggagtc tttgttatac
     1741 ctgaatgtcg ataattttca gttagtaaat gacaagttac aacgtaccat tgctcgcatc
     1801 gactacaaaa tgtcaaaaga taaccaaggc gaattggatt tagctgaccc agtgcaagaa
     1861 aatattgagt ttgatgccaa tgtgggattg gatatttcct atatggttcg ccagcttact
     1921 gatgttatcc ccaatccatg gcaagcaatg cgggtattaa cgcacacttt agacatcttg
     1981 cgtgataatg gcgtcagtga agagtcgttg ttcaccaatc gccttgagtt gctcaaggaa
     2041 atgaagcgtg atattaaaca acaggttgtt caattgtcgg aacaaatctt caggatcaag
     2101 ctggacaagg gagatatttc tcttcgatta ctcgcatcag acaatgacaa actgaattgg
     2161 gaactggcgc aaacgttaga agtaaatgtc acggagcatg agcaagtgct tcgtcgcaaa
     2221 gacggctcag agctagaaag aagcttgttt gagaaagtgt accaaaatgg acttaatagc
     2281 ctagagcgag aaactgcctg gtatttggat aaacaagaat cagtgtattg gtggcatcgt
     2341 atcgcggtaa atcaacgcga atatagtctt cagggctggc agaagcagaa agtttaccct
     2401 gacttattgg tgtgtgtcga agagcctagt tcaggcaatt accgtttctc agtactggag
     2461 accaagggcg agcatttgaa agggaatgat gatactgaat acaaacgtcg cttatttgaa
     2521 ttgttgaccg aacacgtcaa aacggcagtg gatgcgggag aacttacttt ggaagcggca
     2581 tctggtggta tttcattccg catgctcatg gaaaatagct ggtcgcagga aattgtgcat
     2641 gaattgaact aatgagcaat ctagtttggg ttgtactgtc ttcaactctc acgctcctcc
     2701 ttaaaagagg agcgaagctc aaatggggtg tcaagtttat gaagaggcag ttgaacctgc
     2761 caataccttg gcctacgaaa ctgtagctgt ctgtaattaa aattgtgtaa tcgagtgtta
     2821 atgatatttt cattccaggc tgtttgtgcc atcagaaacg aaaattctca tgctgaaaag
     2881 ggaccacatc tactacatca ggccaaaaga attatgtcgc ttcacctgat atcttacctg
     2941 accttagaaa aaaatatttt ttaaactcct tgctaatttt aacataatgc cagcccgatg
     3001 aagctccatc cattttgcct atgcatacag aattatgatc atgatttact gagcgaaaat
     3061 cctcaaggtt ccctctgtcg gctacgggat atgaatattt tgcccagttt tttcaaacat
     3121 cactcactag ctacaaattg tagcgtaaca gaataatcaa tttgtgcata ttcattatca
     3181 acgatatcag aaagatgtcc tatccatatt cagcaatatc atcgccacgc ttacagactg
     3241 gttatccctc tgcaccatta caatgaactg aagcagttat ccatttatca ttaaatcttg
     3301 agcatggttt tcaacgcacc ttcctagcct aatcagggct cacaagcagg cctctcttac
     3361 agcctgctca tttatgacaa ttttaaacag tcgttagttt tccaaactca aacggactca
     3421 ccgccctctc ccggttcgca tcgagaaaat ccgcccacca ttgcagcatc agcctgcgtt
     3481 catccagatg ctccgcctta tgaatatacg ctgctcggac accgttacgc tcctgatggc
     3541 tcatctgccg ttccacagca tccctagacc acaaccctga ctcaattaac gaactacagg
     3601 ccatggtgcg aaagccatga ccgcatactt ccgttttggt gtcgtagccc atggtttgca
     3661 gcgctttgtt tactgtcccc tcactaacag gttttcgcga cgaatgatcg ccaatgaaaa
     3721 ccagctcaca atgcccactc acttctctga tctttttaag gatctccagc gcctgacggc
     3781 tcagtgggac aaggtgtggc gtgtgcattt ttgaaccgcg ttcggagaac ttcactccgg
     3841 ggattggttc acgttctggg ggaatcgtcc acaaagcgcg ttcaaagtcg atttccggcc
     3901 agcgggcaaa acggagttcg ctggaacgaa tgaaaatcag tagggagagg ttaataaccc
     3961 acttggtaaa ttcacgacct ttataaccgt caatccggcc aagaagttca ggcaagcgtt
     4021 caagcgctaa tgccgggcga tgttcaactt tgccgggcat aattgcccct gccatatcct
     4081 gcgccggatt gtagtcaatc agtccatttt gtacggcata ggtcatgatg gcggtcacac
     4141 gttgttttag acgcttagca acttccaagc gtcctgaacg ttcaacgctt ttgatcggtg
     4201 ccagtaagtc gcgtgttttc aaatctgcga tatgtgtgct gccaatagcg gggaaaatat
     4261 tgtcgctcag gcttttcagg atacgttcgc catgggattc agaccatttc ttattgtcgg
     4321 cgtgccaggc gcgagccaca acttcgaagg tcttttcatc ctcttcctgt ttggctttta
     4381 ccgctttctt atgttcgcgg ggatcgatgc ccgcagcaac ctgtttccga gcttcatccc
     4441 gtttctgacg cgcttcagaa agagagactt caggataaac acctaatgcc atgagatgtt
     4501 gcttgccacc aaaacgaaag cgcagccgcc agtatttgga accattggga tgaaccagca
     4561 gaaacatccc atcaccgtca gtcagtgaat actctttttc ttctggtttt gccgaacgca
     4621 ctttgatatc ggtcagagcc attatcaata tcctcattgg tgcttacggt gagtatacag
     4681 agcaagatag aaccaacata tatactcaga tgtatactca caagcaagtt gatgtaggtt
     4741 gaattgcgtt gacgttggga gagtatggaa tgaagggaaa gccagtaaaa ccgtgggttt
     4801 taggcaaaaa aatagacgtc ggttgacgtc tattgattta tcaatggtgc ccggggcggg
     4861 acttgaaccc gcacagcgcg aacgccgagg gattttaaaa agttacacca cattaaataa
     4921 aacaataggt taaatgatat caacgagttg caatcacgga attgtacgga atattgcgct
     4981 acgctcgttt ttgctgccat caaatttgac aatggcagcg atatgattac ttatctattt
     5041 ctaatgaatc gaatggattt agggtaacag ccgcatccag atgatcgggc gcaaagtggg
     5101 cataacgcat cgtcatagtg atagtgctgt gacctaaaat ctgttgcagt accagaatgt
     5161 ttccgccgtt catcatgaag tgtgatgcga atgagtgacg taaaacgtgg gtaagctgcc
     5221 cgctcggtaa ttcaatgcca gcccgtttaa tggcgtactt gaaagactca taagctgggg
     5281 tgaaaagcgc cccacgtttt ttaggcagca agctgcgcat cttctcagaa attggcaccg
     5341 ttctgttctt gttgcctttc gttttggtga acgtgacacg gtttggcagg atttgagatt
     5401 gctttaaatc ctgtgcttca ctccaccgtg ctccggtagc caggcacaag cgaacgataa
     5461 tacccaaatc cttattgtct gattcatcac acgcagccag caggcgcttt atttcttctg
     5521 gatagagaaa tgccagttcc tgatcaccct ctttgaattg ccgtatgcca tccaacggat
     5581 tttctttatc ccactccccc atccttttca gttcggagaa tacagcacgc aggtaagagt
     5641 attcacggtt gaccgtcgct tctttcagaa cggctttacc ctttggattc cactcacctt
     5701 taaggcgtcg ttcgcggtaa acggcaaaca tatttttatc aacgtcgata gcaaacggat
     5761 cgcccaagcg ttcacaaatg gcgagtaatt tcgtgtaacg ggaatcaccg gatgacagag
     5821 ttttgccgtg catgtcatac caacgctgaa ccaaatcttt cagagtgatg ttactggttg
     5881 tggtatcaat gcctttttta tcggccataa ggcggcgctc ataggaaagt gcctcaccac
     5941 gggtggaaaa ctgcttgcgg atacgtttac catcacgacc ataagggaag cactggcaaa
     6001 gccatttgcc ggaggagagt ttgcttacag ccatattcta gacgaacaaa aaacgcgcca
     6061 cagctaaagc tatacctgct gtgccgatga tagtcgcagc aatccatttt gtttgtgcag
     6121 aaatttcttt atggatagac gacatttctt tctgtagatc gcttttggtt gcaaactctt
     6181 ccgagcgtac tgatagctta gctagatcaa cttttatctg agcaatgctg tcttccgctt
     6241 tagctactcg tttcagtaac tcatccatac catcacctcc actaccgcca ttatcacttt
     6301 ctttcattct atcagcaaaa ggtaacggtg catcacgaag ctgtacaacc ttgttattat
     6361 tatccttatt catcgtcagc ctccttatca ctattttcga tccatttaag aaccggataa
     6421 actcggtaaa aacttacgtg accacagttt atgcaagaaa ctcggtattc gcagttggat
     6481 ggtctggggt aggcagttgg atcaacatat cgataggtaa cataacgcgt gaccagaaca
     6541 tttatggatt ttactagctc ttctggtgat agctcacttg cattttctgg taaatcggca
     6601 gaaccaagtg atccactttc aggaacagat aatgccgaag aaccgcatga caaacagtgt
     6661 tgtgcagcgc cctttgcaga gaggaactct gcaaacaact tgggcgtaac tttcattaat
     6721 cgttctttta atttttcttc tgctcgctct ctcttgagag tttgagttgc aaaaatttca
     6781 tctaactcta ggggagatct attattatct gtcatatata ttgctcttcg ggatttaaaa
     6841 taatcaccac ttacatgcac cacgtagagg cttaattgct tcggataaac ccactaaatc
     6901 aaaacgtgca gcaaccggac tttcgccata aggaataacg gttgtataaa atgatttacc
     6961 actcataagt tcttttatga aactgattgt tttccctgca tagaatgctg atttattatt
     7021 agtggatatc gtccatgact tggttactgc tttttttgaa tctatccgat aggtcatttg
     7081 tgtttcattc aatccgaggt atgaatccca cccaacatac aagtctgttt ttccttctct
     7141 gcaagtgaga aaaagcgtgg ggacaattgg ttgcccaaat gctcctcgaa ttggttcttc
     7201 cgcctccaga taaacataag cattccatga atcatctaaa gatgactgct ctttattaat
     7261 gacccacttc ccaacatcgc cagtagggtt actatcatca tttgcgtcat ttttctggct
     7321 aacaggtgca tcagcttttt tatctacttt atcgaaacag gctaatcgct gtttgctatc
     7381 accaattgat ttgcaggcta atatttcatc attactgagg tttagttctg ctgcaaaaga
     7441 accactacat aataaaaaag acattgctgt taaaaggtat tttttattca tcaaagactc
     7501 catttgatta aaaataaaat aagaaataat ttctatgtat caatgcgcca acaacatccc
     7561 cagcacgatc cccgccgcca gcactgcgcc aaaaatccgt ggttctgctt ttagggtatt
     7621 taccgcatct tgccacgtct gcacttttgg gggtgatgcg ttgggtgtag gtctgccctg
     7681 ccgctcatcc agccatccca tagcctgttg aagctgggga cgggttaaat cgattaaccg
     7741 gctcgtacca aaattgatat gacagaacct cgtaagctgt tcgcgtaatt cgttctgctg
     7801 tgtgcttctt aataattggg acactaattt tttattagca tctttttccc gactgcgatc
     7861 atgtaatgca ttcaggaaac ttagcgccgt ggaatactgg ctgatggtga tttcttcaat
     7921 accattaacg ccaagctcag catgtaagcg acgccaaaca aaacgcacat cttcacgccc
     7981 tgcttccgca atatctttca ccaactggtt taattgggaa cgctgtgcgc taaccaatgg
     8041 gcgcaaatct tctttagatt ctggtgcagc aatattgata tttttttcgt aataatcacg
     8101 tcctgcgacc cgattattat ccccttgagc ctctacggtc atccattaca tccttgatgc
     8161 ttcgctactt cttgccttcg tgatagtccc tgcccgctac gcgctggccg ctacccgtta
     8221 cgtttatcga tgctgttgca gaactacccg ccgtcaacgc ggctaaggcg gcagctttta
     8281 tcgccaatgg tgcagcgcga tagattttga tcagttctaa ttcgtcatta gaaatgtcac
     8341 caaggtcagg ggttcttttt ccagtgagga tatacaaagt atccatgccg taattttcac
     8401 taagaaaagc aagcgttgca ccatcaggcg cagtttcacc acgctcgtat tttccccaag
     8461 tccttgttgt cgtgcctaat tcttctgcaa ttgcactctg acttttacca atcgtttccc
     8521 gctcttcgcg caaacgccca ccaataagga ataaaaattc ctctttcgaa gttgacatag
     8581 gaagttttct tcactagatt gtgttgaaca ggaacttagt ggatcacaac ataccattat
     8641 gacacaagaa aatcatgatc agagatcgcg tttaccgcgt ggtatcgcgt ccaaaaaccc
     8701 caccccaatg cgcttatcgg acgatgagcg caacaaactg gcggcactgg cagcacaaga
     8761 aagccgctca ctttcaagca tggcccgtct ggtgtttctg cggggactgg aatcttttaa
     8821 cgcacaagga tagtaggtgg tgaaatggct aaggcattaa acattaatat caccgtccct
     8881 actccatatg tttcattaaa aacatattca gaaatgacgg ggattccatt acgtacctgc
     8941 gaaggaatgg tttctgatgg acggataatc attcggccta aaaaagcgcg aatggagaaa
     9001 gtcgaggtta atttaatcgc catgcttcgg gatgcgataa ccaatagtga aatttaatca
     9061 tgacagaaat caaaacaaat tctaatgcga agaaatttat caacatcaag ggtgaaggca
     9121 atactggttg ctgtattcct tatgatgaaa taaagacgat tgaagatgta ggtccttcta
     9181 agcgctctcg gtattctaat ggggaaacgt taataaaact tattgatggg gaaagaataa
     9241 cagtaaacat accgtatgaa aaagtcatca agcagttaaa gaaactccct gaatttgaaa
     9301 ttttaggata aagaatgaaa acgggaatgc ttgtattttc aggtattgat catgcattaa
     9361 ttaaagtcag cgaacatacc agcgtttatc gcggcttctc tattactcgc tgcccaagaa
     9421 cagcaactaa cccgataacg cgttatcgcg tgagtcaggg cgatcagtca tttgggctat
     9481 ttgatgcatt agtgcaagcg acttgttata tcaacgaact gcacggcatg aggaattccg
     9541 catgattagc atagcgcgtt tattaaaaga aaaatcacca tccccgcaag ataataaagg
     9601 ctggctggaa ttaccaaacg gccagcgttt ccagccaacc cccgagcagg cttattttgc
     9661 accgtggagc aaaaagccct acatgccagc gcctaaaaag cgccgctggt tcgcccgctt
     9721 gatgggtatc gcggcgtaac cgtcatggct aataccgaag ccgcccgcgc cgttccgctc
     9781 agtatagcgg ccagaactga cgggctgaac cacatcgcaa tgctgagggg aaaacacttc
     9841 aacacaaaca gtgaaaaaga tatgtgccgc tttattgacg atatgcggga caagatagac
     9901 gacgattatc atcaaaatat gcgcgtactg tcagcgatat ttgaattagc agatattgat
     9961 aaggaacggc ataacatgaa atttaatgaa ctgacaactg aagaaaaagc aaagctgatt
    10021 aaagcgatga ataaacttaa agcagttgtg agtttattcc ccaaacattt aactctttaa
    10081 ctttaataac tccagttttt aaaggcgtaa acccgccggg ctttctatta cctgaaaaaa
    10141 ggaaatcacg atgagaaatg cagaagttaa acaaatgcaa gtggcgagtg ataacgcgct
    10201 tgttgagttg ctgaacaaag cgcgtcagga agaaagaaaa gaccagcatt tagggttttc
    10261 cttgcgtctg gccgcgctgt ctatccatgc gcaaaaaaaa gagtattccg ccgcagaggt
    10321 tatcgaactg ctgcgcaaag aggcagaacg cttcgagcac tcgtcacagg agatcattgc
    10381 atgaaccacg tcatgattga tattgaaaca atggggacga accctaacgc gccgattgct
    10441 tccattggtg ccgtgttctt caaccctaag acgggtgaac tgggtgaaca gttttactgc
    10501 cgcgtcgatt ttgaaaacga catgctgaac ggcgcggtgc cggacggcgg cactatcaaa
    10561 tggtggctgc gtcagtcctc agaggctcgc gctgaattaa tatgtgatga cgccgacgcc
    10621 accataattt ttcgcgcagt cagtgatctc agtgactggc tgacagataa cgcagacaac
    10681 ctgaaatcat taaaagtatg ggcgaatagc ccgtcgtttg acttagttat tatgaagtcg
    10741 aaatttgagc gtttgggttt cgatattccg tggaaatatt ggaatgagca ggacgtcagg
    10801 acgattaaag aagttggtcg tgcgctgggt gttgacgctc gaccattcac aggcacgcag
    10861 cacaatgcat tgcatgatgc tattaaccag gcagcattgg ttgctgctgt tatgtctcgg
    10921 ctggtcgcta ataagccgga gaaatcatgc ggcttcggct ggattgattg gaatgaactg
    10981 agctatagag ggctattagc ccgcattaat caggaaatta tgcacccact tggccccgct
    11041 gtttttcgtg atcaggaaac gggggatcag gcggtgcatt aatttcccct gatggcaaat
    11101 gggagtacag caaaaatcta catgagccat taagcaatct gatattcagt gagattgctg
    11161 atttcttcgc tggcttagaa cagcccaatg cgccacgttc tgccgccgat atgcaaaagg
    11221 cgctactttg tcgcttagag caggtgataa acgcgagggt gccgaaatga tccgcccgtt
    11281 catcaaatgg gcggggggta aaacccgcgt cctgccggat ttgcttccgc tcctgcccaa
    11341 aggtgatgtt cttatagagc cgttcgtcgg cggcgcgtcg gtgttcctaa atacagattt
    11401 tcgccattat gtattagctg atatcaatgc cgacttaatt aacatgtatt cagttgcaaa
    11461 aaatcagaca gacgattttt tggatgctgt cctgcttatg tttaaaaatg gaaactcaaa
    11521 agaagcctat ctagaaactc gtgaattatt taactgggca aacagaaacg acactcgttt
    11581 atcttactct agctcgttca aattgctcca agcggcccgt ttcctttatt tgaatcgaca
    11641 cggttataac ggcatgtgcc gatataacaa aaacggtgag ttcaatattc cccacgggaa
    11701 atataaaact caatacttac cgttcgtcga aataaaacag tttgcggaaa aagccaatga
    11761 cacgaaagcc ctttttgtcg tggcagattt ctgcgaaacc ctaacatcac aagcgataag
    11821 cgagagcagc gttatctatt gtgatccgcc gtatctgcca gccagcgata cggccaattt
    11881 tacgcaatac catcacgctg cattcaccat cgaccatcac cgagatttag cggcgcagct
    11941 gctgaaccta aaccgctcac gcggtgtacc tgtcgttatc tcaaacagtg ataccccagc
    12001 cacgcgcgag atttatcaac actatcagtt tcatgaaatt gcggttcagc gatctatcag
    12061 cgcaaacggc atcacgcgcg gtgctgcaaa agaagtgatc ggcgtgctga aaacctgtga
    12121 cggctgcggg cgtgcgggcg gcggttgctg ccctgattgt ggcccatgca tgggcgatgc
    12181 aacgtatcag gaaatggttg catctggtgc gttcgatggc ggggcgttct gagtgcctga
    12241 acaatgggcc tatccgtgga atgcgccacg tccagcgatc tccataccac acgagatcgc
    12301 tgactccttt cccccatcag ccacaaatgc caccgaaccg cacccagccg tagagcagca
    12361 tcttaaacgg ctggtatcgc gtactgcttt ctccgatctg gatttcgatc atgccgtcgc
    12421 gcggctggac tatttcgagc ctaatgcaac gttactgacg atgcgccgac agttcgcaga
    12481 ggctgagcgt gacgagcatc acgcgatgtt gcaacactgg atggaaacgc cggaaggtgt
    12541 tgaagggcgc ttgctggaac agccgttttt tatccgtgac acatacaggc aaaaaataga
    12601 atggctacgc gccaaccgcg agccgcgaca cgtcagcgcc tttttcatgg gaaccgtgaa
    12661 aaaagccctg ctgcgtcttg atgctgtgcg tgccaagcaa ggtgtgcgcg atggttttac
    12721 ttcagagctt gccagttact ggcgcgcacg ctggcagcat ttggcagagt ttacgaaaca
    12781 tgaagcgatt aacgctggtc acgctatcgc agcaagcatc gcggaaatgt ttgaaaccga
    12841 atgcggcagc acattgcccg ctgatatgac caatgacgag attcaggcgc ttttctggca
    12901 tttaggccgt gaaatgctgg cgctacgcat aacgccgccg tgctggggcg tgatcattgg
    12961 cgatgacgaa tcaaaaaaac gtatttgctc cgccattctg cgcatcatca gccccgaatg
    13021 gtggggacgt aagttatggc gtttgcgctg cgaatggcga gaaaaccagt tccgcgccat
    13081 cggcgtgatc cacaagaaac gtatgccata tgtcagtatc gatgcactga accagtggca
    13141 agagcaacgc cgtaaaaacc gcgaattctt taaggcgcat gaactcgtcg acgaagacgg
    13201 taacgtcgcg tcgctggaaa acatggtgta cgccagcatt agcaatccgg ttattcgccg
    13261 tcacgaactg atgacgcgaa tggcaggcgt tgaaatggtt gcaatatcgc gcggtgatgg
    13321 gggagttttt cttactataa cttgcccgtc gcgttatcac gccacaattc agaacggcca
    13381 ccataacccc aaatgggata cctcatcccc tcgacaggcg cagcgctatt tatgcaagac
    13441 gtgggctaag gccatgtcga aactgaaccg acgcggcctg cgtccgtatg gttttcgcgt
    13501 tgcagaaccg catcacgatg cgacgccgca ctggcacgta ttgctattca tgccgcccga
    13561 agaccggaaa gaaatcactg aaattctgcg tgaatatttc atagcgttag accgcgctga
    13621 gctggggcgt aataccggtg cgcgctttaa agcgaagcgt cttgatccga agaagggtag
    13681 cgccaccgca tacgtggcga aatatatcag taaaaacatt gatggctacg cgcttgacgg
    13741 tgagcgtgat aacgaaaccg gaaagcctct gcgcgaaacc gcaaagtttg cgatggcctg
    13801 ggcatctcaa cataacatcc ggcagtttca gccgttcggc ctgccgccag tgacagtctg
    13861 gcgcgaattg cgaaagctag cgaatcagct tacggcagtt cagaaagaag ccggaacctt
    13921 caagcgcggc gcttctcagt tagccgatcc ggcaatggat gccgtgctgg catctgcgga
    13981 cgtaggttgt ttcgctactt acatcgaaaa gcaaggcggc gtgcttatac cgcgcgagtt
    14041 atacaccgtg cgtatagcgt atgaagccgc agacgagcaa aacgactacg gcgagacgcc
    14101 agaaaaaatc tttggtgttt tctcgccacg cttgggcgag ctatcgcgca tctgcacccg
    14161 tctcgttaag tggaaaatcc gcaaaaaaca gacagtagac gcaggcgcta atgatagcgc
    14221 tgggcgcggt ttggctgtta cgtcgccaac cggcgacgct tggagttctg tcaataactc
    14281 tacgggcgac gaaaaaatag tcaaaaatga gccgctcgat agagatattg gcagtacgtc
    14341 agagcaagaa attatcgact ttgagcacat gatcgacacg gaacggcgtg gattgctcaa
    14401 tcgacttcga tctcagccgc cggatcggcg acataaagaa cactcgtcca caactcagcc
    14461 ccacaaagag aatgaaaaac agactgttag taaacggtca gacgactggc gcgccagcgt
    14521 tgccgatttc gcccgctcaa tggggtggga tatcagcgcc ggtgagttgc ggcggctgga
    14581 agcgggtaat gcgatcacga ttgcaggtca tgcatacatt gctagcggtg acggttgtct
    14641 gtaccgcgca ccgatgaaaa agaaaaaaga cgtggaatat caggatagag cggcgacgct
    14701 actacaacgc atcgccgcgt tacgcgaagt ttcacaatca taaccgactg taccgaccga
    14761 ttattcatag acagttttat tataggaaga ttgtatttaa aattagcctt tattatataa
    14821 gattaatgat tcttacattt ccccgagcac gctcaacttg caagttggga tatattacct
    14881 atcattttcg ctatattttc aaatatctta atcccgtttg aagacatatt ttcagtcctc
    14941 tcaaccacat cggaaagttt ttcgaacttt gtttttgtgt ctgctattac acttttaacc
    15001 gaaaggttgg tatcttcatc cagagctaca gtgatagatg acaatgtttt ttctattatt
    15061 aaattagcct caccgctttt atcttttatt tcgcccctta atttctctaa accttccttt
    15121 aaagaaatta aactttcctt ttcatcatca atcggctttc tatccgaata cgtattacac
    15181 tcacactcca tcatacagca tactgggcac cccatttcgt agtaactgtc aaaagatgct
    15241 gttatatttt ctttcccttg agttacaaac catactgaca ttaaccaaac gaaaacatct
    15301 gcaaactctt cctctaaatt cttcatgagt ttttctttat tctctacacc atgtggtttt
    15361 ttcaaccgtg aataggcttc atgtatctcg cctacttcct ctaacagttt agagaaaaca
    15421 aaaaacacac cgtgcgtttt ccaaattaac gcattagcag gatatatttt tgttattatc
    15481 aatagagctt tttcaagtga aataacctgc cctgaattaa taacactatg ataatttgag
    15541 actaaattat cttttgcttt ttcgtagtaa cttccatcta cgggtgactt atccgtaaca
    15601 ccacaaacac aacttgatga aacacaataa gggcaaagag tagggtattt tcttatgaat
    15661 gagttttcta tatctatttt ctccaaatta gcaagggaaa aaagccatga caatgacttt
    15721 ataagctgca ctttaattga atcctttgaa ttatcgttaa ctgcacgctg taagtaggaa
    15781 atttttctca ctaaatatga aaaagagtat tcaaatccat tatttacaga taagttattt
    15841 ttattataaa tactttttat tttatattga actactgaga ttctagtttg gtttgtgtgt
    15901 atcataaaat catcctttat ttatagaaat taaaaacata aaaaatcata gatgtagtgt
    15961 aatgagatag agttgagatc ttatctatag gtaatattgc catattaacc tatcacgatt
    16021 ttttagtttt ttacagtttc cactgcacaa gcccgcacac caatgcacaa tttttttgat
    16081 gctactaccc ccttcccgcg ccagatctgg cgcgggtttg tccctaatgc acaactgcat
    16141 aaaaacgcgc tattttcgtg tgcgggcgtg gcggggaacc ctcgcgcgct gagggggata
    16201 agaggggtat gctggttcat atgctactgc atcctcatca cgtcgctatt gctctgtctc
    16261 gatctcggtc aatcgcggca tcattctcct gttgcggtgc tcagaatggc attcaggcgc
    16321 ttttatgcag acatgaaaaa accgggcaac cttgcggctg tccggtcttg tgtttggtag
    16381 ctaggtgaat ggttttgaat gactttcgcg gttacattgc accttcggcc agggcataag
    16441 gcttgaaccg aagtacctcg atccccagcc agtcgttaag ctctttcagg ctttccatta
    16501 tcggcattag ttcgttgatg gcgaacacct tcgcggcttt ctccacgtca ccaaatcccc
    16561 ctgcattgtt cggcataatc cccattaagt tgggcggtac acggtgcgcg gctaacatat
    16621 cgtcgcgggt tgcatcttta ataccggtaa attcatcttt ggccgcaatc tggctaaacg
    16681 gcaggatttg caggccgtcc ttcttcccgc ctgccgcgta aacaaacagg ttcttaaatg
    16741 ccccgccacc gcgtgcatct ttcagtgact tcttcagttg ttcgacgtca gcattgttgg
    16801 tgatgggatc ggtgaggtag acgatcaccc ctgcatggct cccgttgatg tagtaattac
    16861 gccggaacaa cgtggcttca ccgttcagca tcgctgattg gattaccgcc atatattccg
    16921 gtgtgccgta tatctcttgg tgaatgctgg ggcttttaac gtggaacacg ctgcctggct
    16981 cgaattcgtg atcgttggcg tagtacgtca caaaccagta ctgatccaga ttctccccgc
    17041 gtcgggtgta cttggcatgg gtgtgcttta gcttcagcgg ttggccgaaa cggttctttc
    17101 tcagttccag ataggcatta ccgaacacca aaaaatcgag tacaaacgcg ttggcatcct
    17161 gccgcgataa cagtgggtgc gattcgtagc aggacatgat gacattgcgc ttgaacagta
    17221 tcggtgactg atgatgcacg gcaacgtcaa acattcgcgc taggccgtag gtgctgatcg
    17281 gtggttcata ccagcggcca tttctggcgc actccatgca gtccaacagg tcgcgcctgt
    17341 ccatgatggg ctgtgcgtca ccaaatgaga aagactgtag tgactcaatc ggctgttgga
    17401 ttaattcccc tgttacgggc gtctgtgcgg ctggggcgcg tagattggcc gtgcgcgggt
    17461 gctgtttctt acgtgacatg gttagaactc ctgaataaat ccatcattac cgcccgactc
    17521 gctgccgatt ggttcattgt gtaacgcgtg catggttgcc caggcaatgt caccgtggct
    17581 gctgcctttt gttctgtctg atgcatacga cgtcatgccg ccctgcgtca caaatttccg
    17641 taccgtcatg aaagaccgcg ccagctccat catccccgcg tcatactcaa accgccccgc
    17701 gcggatcagc atttgggctt tcagtaccag ttcgcgttta acgctgggcg aatattgata
    17761 tttcacggcg gcggggaaaa acttaacaac aagctgatgc acggcgctgc cgttgccggt
    17821 gctatcaatg ccgataaact gcacgttgta ttggtgggtc agttctttaa tgacctcagc
    17881 ctgtttttca aaggtcatac cgcgtaactg ccgtacctca atcacgcgga acttaccgcc
    17941 aggaacggcg ggcggagaca cgatagacag accggcgctg tcacctgtgc cgctatcgcc
    18001 gctcggatcg tagcctatcc agacggggcg atgacctaac ggccgctgcg tgtagggtcg
    18061 ccagtccggc cagacatcat cgttatagcc atcaacaccg cagttaatca gcgcggtata
    18121 gtcaaaggct cgctcaccga cgctgacaaa gcggcaggcg taaaggtttt caaaatcgtc
    18181 agggctgttt tcagatttaa tttcatccag atcaaccagg tcaaaacctt gctctaacgt
    18241 gtcatgaatg gtgacgatct gccgccagat attgtccccg cacaacagcc ctttctttag
    18301 aaccttgtgg gtaacgtcga tttctacccg ttccgcttta gggcggcttt tgttaaagaa
    18361 atcccctgtc cagaacgtgt aggctccatg ttcttcactg gatggcgtgg aaaaatacgt
    18421 gcggcgcaac cctttttgcg tcgccatccc cgccgcgact ttacgcagat tcagaaagtt
    18481 gctaacccaa aagaattcat caaagtacag attgccggtg tagctctgtg cggttgccgc
    18541 tgacgtaccg aggaagtaca gcgttgcgcc gttcgacagt acaatcgcgt caccgccttt
    18601 cagctccacg ccaatgctgg acgccagcag ttgaataaac cgcttgaact ggtacgcctg
    18661 cgccctgctg gctgacagaa agatttggtt agtgccggtt tccagtgcat ctaacagcgc
    18721 ctcacgcgca aaataccagc tggcacctat ctggcggctt ttcagtatcg cgcggttacg
    18781 ctgcttgcgt tttttgtacc agcgcttttg gtgctcgtag agtgattcca gtatcagcgc
    18841 gcgcaacgct gcgatctgtt cgtccgtaaa atggtttttc ggcgctttct tccgtgcctc
    18901 cttttcctga tcttttcgtt catcgcgtga gaaacgcgcc atctgacggc ctaacaggtc
    18961 gatggtttta aagtcatgcg gcgtgaggtc ttctttctct atcagccgta aatagcgtac
    19021 ttctgtgcgc tcctgcgccc gctggatcgg cgtgctgtca tcccacttat cgcgccgtcg
    19081 ccatgaatag agcgtgttgt tgctcacccc cagccgctgc gcgatttgag ggatgctata
    19141 ggcctgccag taaaggcttt tggcttctgt gcggatatcg ggaagtagat tcatacatac
    19201 aggctatcgc gcccgcgcgc ggcaaaatat cggctcccgt tgtcgtggtt ccgcaacaac
    19261 ccgcaccgat agcgcctgcg gtgaagcgtg gcgatgatag gggtatcaga cagacactct
    19321 gttatcaccg gagcattacc atgccgattt caaaaccgtt tcttgccgct gttgaaggcg
    19381 cgacctgcga cggccgtacc cttgaacgtg cgcacatttc gcaaatggcg aaaaacttca
    19441 acaaacaggt gcgcggtgct cgcgtgaacc ttgaacacat tcgcggttac tcgccaacca
    19501 gcgattttcg ggcgtatggc gacgtggagg aagtgagcga gtttgagatt caggacgggc
    19561 cgttaaaagg caagctggcg ctacaaatca agattgatgc gacagatgat ctggtggcat
    19621 tgaacacaaa acgccagaaa atttacccca gcattgaaat tcacccctct ttcgctgaca
    19681 ccggtgaagc ctatttgatg gggctgggga tgacggacga tcccgccagt ctgggcgtcg
    19741 gcattctgga gtttaacgcc aagtgcggcg gcaaaggccc gttggacggg cgaaaaacca
    19801 gccctgaatg tttcttcacg gccgctgata cgccgatcac gctggaattt gaagacgatg
    19861 cgccaaatgg cgacgctggc cgaaacttct tttcccgcat cactgagctg ctaaccggca
    19921 gtcagcaacg attcagtaaa gaaaatggcg agctgaaaca ggcggttgaa ctgatcgcca
    19981 aaagccaacg tgagctgttg gataaaaccg aaacgttcag cgcgttgcaa gcgcaaaaca
    20041 ccgagctgaa aggcaacgtg gaaatgctga ataagtcatt aacagagctg aaagaacagc
    20101 ttgccggaca ggatggcaac tttagccaac gcccccctgc ttccggcggc aaccagcaat
    20161 ccaatgtcgt gttagctgac tgctaatcac cctttaaacc gaacatcgca ggaacctaac
    20221 atgcaaaatg aaacacgcgt tttgtttgac gcttatatta atcggcaggc tgagttaaac
    20281 ggcatccagc cagcgcatgt cacgacgcaa ttcagcattg caccgtccgt acaacaggag
    20341 ctggaagata aaatccagca atccagtgaa ttgctgcaaa aaatcaatat cactggcgta
    20401 tctgaacagg aaggtcaaaa gctgggactc ggtatcagtg gtccggtttc cagttcaagc
    20461 acgtcaagta cggaacgtcg tgaaccgaaa tctgttcaca cgctggatga tgataaatac
    20521 cgctgtgagc aaaccaatac ggatacgttt atcagctatc cacaattaga tgtgtgggct
    20581 aaattccccg acttccagca gcgcattagc aaccagatca tcaagcgtaa agcgctcgac
    20641 cgtatcatga ttggttttaa cggtacgtcg cgtgccgcta aatccgacct ggcaaacaac
    20701 ccgctgttgc aggatgtgaa tatcggctgg ctggaaaaat accgcctcca tgcatcacaa
    20761 cgcgtgatga aaaacatcac cgttaccagc cgtgatgatg aaaacaaagt catcgcgaaa
    20821 ggcgattacg gcaaccttga cgccgtggtc tatgacgcca ccaattcact gttggatgag
    20881 tggtttaaat cgtcacaaga cttagtggtc atctgtggtc gtcagatcat ggtcagcaaa
    20941 gaatacccgc tgattaacgc catcaatact accaatccga attcggaagc actggccggc
    21001 caactactgg tatcgcgtaa agctatcggc aacctgccga cctttattgc gccgttcttc
    21061 cctgatggca gcatgttcat taccccattc agtaacctgt caatctactt ccaggacggc
    21121 aagcagcgcc gcgccgtgcg ggatgagatg gaatttaacc gtgtggcgac ctatgagtca
    21181 tccaatgacg cctatgtcat tgaagactac ggaacaggat gcctgattga aggcattacg
    21241 tttgctgcgg cagcaccggc gaaaggctaa tttcaacggc aagcaggcca gataacactc
    21301 ggcctgcatc aagggggcat catgctgaca cctgcgcagc gacattttca aactgtcatg
    21361 gcccagcgcc acggcaaatc aaacggcggt gacgttgagc gcaccgccta cgaacagcaa
    21421 ttgcatcggc tgaggatgga taaatcccgt ttaagtcagg tgcagtctgc cacgacaaag
    21481 gccgaactga aacgcgaact gctgcccgac tatcagggct gggttaatgg cgtattggca
    21541 gcagatagcg gccaggctga tgaagtgctg accacgatca tgatctggtc gattgatgct
    21601 ggattgatta gcgatgcact gcgtattgct ggttatgtcc tgcgtcatcg cctgcccatg
    21661 cccgatcagt ataaacgtac cgttgccacc acgctggttg atgagatttg cgatcccgca
    21721 ctggcagcat ttaaagccga tacaaacatg gttcctttgt ctgctgacct gctgttgcaa
    21781 ttggaacggc ttaccgctag cgaagacatg ccggatcagg tgcgcgccaa actttacaag
    21841 acgttgggct acaccctgcg cttggatact aaagaactga gcgccgcgcg cgactggttg
    21901 caacgcgctg tcacgctgtt tgatggcatc ggggttaaac gcgacatcga gttactgggg
    21961 cgggcgctca agaaagcaac tgagccagag gaagaaaaca cagatgcgcc accgcctgcg
    22021 gataagccag ccgtcaaagc aacgagagcg ccacgtaaat cgacggcgaa agcatcacga
    22081 actacgacac cacgcgcccg aaaaagcgcg tcgtaaccaa acgtgccccc gcgcaccagg
    22141 cggcacggcg taatacgggc aatttattgt gtcgtgttgc gtcgtccacc gcctgtcttt
    22201 tgaggtagtg ccatgagcct gattgccaca gagccggtaa ggccggccac gcaggacacc
    22261 atcaacgatg gtgatgcgaa agtgatgagc catgcatttt ggccggtgat tgtcctgtcc
    22321 gctctgcgtc gtgcgatgcg tcttgacggg caagtgacaa cagatcgcct gatggataag
    22381 gccatagaag cggtagcgca cgttaacgac cagttgtccg actggcgaag cggccaggcg
    22441 caacgtggtt ttgccgttct gtcagaggtt aaacccgata gcgctggcga actcgaccag
    22501 atcaatggcg agtccgtttt ggtctggcgc taccgccgtg cggtgtactc catcaccaaa
    22561 gcgttgttga tcgaggggta tcgcgatatc gacaccacgc gcgaggggga aaagcacgca
    22621 gaggcgttga gttcacagat tgacacgctg tggcgcgacg gacgctgggc tatccgcgac
    22681 atcctcggtg ttaatcgcgg cctggctgag ttggtctgat ggaagttcgt gcacagcaaa
    22741 atgacaccgt tgatctgctg tgctggcgtt attacggcag aacagacggt gtaaccgaag
    22801 gggtttacgc ggcaaatctg ggcttatgcg aacgtgggcc attgttaccg gctggcctgc
    22861 tggtcacgct gccagacgtc accgcagcaa cacaacagga aatcatacag ctatgggact
    22921 gacgacagat cgcgtggcat cggcaatcac ctacttgctt gccacgctga tcgctaccgc
    22981 aggacgaatg acgctgagtg actgggcaac gctaataggg attgctatcg ggttgctcac
    23041 gttttgggtg aaccgcaacc acaaaaagaa catagagcgt gaccaggcac agcgcacaga
    23101 cttaatgcga gagctggtca ggaaagttga tcatgaaaac ctgccagaaa cgttggacgc
    23161 cttgcgcgtg atgaacgggc aggaaacagg acgtcgaggc cgtgatgcta cctgaagcac
    23221 tgaaacagag aattattccc gtcgttaccg cgtgcgcatt ggcgatagct accgtctttg
    23281 ttggcttttt tgagggcaaa gagaacaccg cttaccgtga tatcgcggga gtctggacga
    23341 tttgctacgg acataccggt gatgtaaagg ccggtgacta caaaacagat gctgagtgcg
    23401 acgcattgtt acagcaggat ttaaagcctg cttttcatgc catcgatcgg ttagttacgg
    23461 ttccactcag tgagttacag cgcgctgcac tggcaagttt tatctacaac gtcgggacgg
    23521 gtgcatttga gcgttcgacc ctgcttaaaa aactgaaccg tggtgatctc atcggcgcat
    23581 gtaacgaatt acgccgctgg aataaggccg ctggtcaggt ctggcaaggg ttaaccaacc
    23641 gccgcgaggc cgagagaatg ctatgtctgg aaaagttata gcgacattag ccgccacgct
    23701 gttgtttctc gccgctatcg tactggctga acactaccga caaaaatcac agcggctttc
    23761 gggtgaaatc acaacgttaa tcgcagaacg ggacagcgcc gagcgcgtta tcaacaatca
    23821 gcaacgtacc ttccagatat tcaacacgct gtcacgcgag gctgaacatg ataaacgcca
    23881 gatacagcaa gatgccgata cacgtagtca gacgattaat caggcgctgg ccggtcaggt
    23941 ctgcgctaat gagtttgtgc ctgatggcgc tgctgtgcag ttgctcgact acgcgaaccg
    24001 tttacgtgcc gatagcctgc gttcccctgc cagcgaacct aaccgcaccg acggtaatac
    24061 cgctgccgca gggcgcgata gtcaataacc gtctgaccta cggccagtcc gttggctgga
    24121 atggtctgct gctggctgca ctggagagcg ccaataaaga taaagcgctc attcgacagg
    24181 ctgaacaaca aagagagcaa caacatgcta aaagcggaac tgctgagaaa agccattagc
    24241 gaacaggtgc cgtggttgcg ggaaaacccc gatcaactgg tcgtctatgt acagaaaggg
    24301 aatgcaataa gtaccggtgc gcgctccgcc tcctttgaat atcgctacac gttggaagtg
    24361 ctggcaatgg actatccgca ttctatcgat acgctaatgg tgccagtgct gatgtgggcg
    24421 agaatctatc aaccggattt attacttaac ccagaacggc gtaaaacagg tattacgttt
    24481 gaagcggatt tgctgagtaa tagtacggcc gatttattga tccgtatcca ggctgatgag
    24541 gcggtgatcg tcacccgcaa tgaagctggc gaaatcaacg ctcgtcatcg tactgatccg
    24601 ccacctgatc cgatggaagg acaggatgca tggggattac tggtaaaaga cgatgtggcc
    24661 agcacagtta ttcatgacgc tacggcaggt taatgatgag ccagaatgac gcgctgtttc
    24721 aggagctgga tggatatctg aaatccgttg ttgaacaact ggcggctaat caacggcgtc
    24781 gcttatcacg acagattgca acagggctgc gtaaacgtca gcaacaacgg attgcacagc
    24841 aacagaaccc agatggatca tcttacgagg gacgtaaaag gcaagcccga cgcatacaag
    24901 gtggcgtccg gtttatgtgg aaaagtgagg tgcgagaact acgcaactgg cacagcagca
    24961 aaggccgcag cggtgagcga atgattaccg gctttgatgt tgggcgcggc ggtttgcgct
    25021 cgttcctgcg tgctgacatc gatcgctatc tcagtattaa cgtcagtagc gtctccaccg
    25081 caccggcacg caaagaaacg atgttccgca agttgcgcac tgtccgtttt ctacgcatcg
    25141 acacatcacc caatagtgcg gccgttggtt tcagtggtca tgcagccagt atcgcgcgtg
    25201 ttcaccagtt tggcgaggct gacaaaatag gacgttcgtc cgtgcgttac cctattcgtg
    25261 agttactggg gctaacgccc accgatctgg actgggtggc cgataccatt acggacttca
    25321 ttcaacccga ttagttgttg ccgtcctcct acaatcccct tccgttgtgc gcccgcgcgc
    25381 gacacctgaa actggcgcta tgaattgatt atcgagcgcc agccatgacc tccaatgagt
    25441 ttgaccgcct gctgcataac ctgatccgta tcggtacggt tgtcgatgtc gatcatgtgc
    25501 gtcatttggc gcgcgtggaa accggcggga ataccacgga ctggatacgc tggggcgtag
    25561 cgcgcgcggg tgatgctaca tcgtggtggc cgctgtcagt gggcgaacag gttcttatcg
    25621 cagcaccagg cggcgatctg gcaacggctg tgatcgtgtt aagcctgtat tccagtcagc
    25681 acggtgcgcc cagcaacacc ccaaaggtac acaccaccgt ttatcccgat ggcgccagcg
    25741 aaacgtatga tgccaacacc tcaacgatga ccgttaaagg cgtcaaaaag gtgatcgttg
    25801 aagcggctga atctatcacg ctggacaccc cgaaagtgat ttgcacccag catctcagca
    25861 ctcaaacgct cagcgtagaa aaaggcggca cgatgcgggt gatatcaccc acaccggcgg
    25921 caaaatgtca tcaaatggcg tggtcgtaga cagtcacact cacggcggcg tacagcgcgg
    25981 cggcagccaa acggatggcc cgcaatgagc aatgaaaaat acatcggcat gaatgccagt
    26041 aacggacgtg caattactga tgatgagcat atcagccagt cagtgcgcga tattttactc
    26101 acccctgttg gtagccgcct aatgcggcgc agttacggtt cacagctttt ttcgctgatt
    26161 gacgaacctc acgagccagc aatcaagctc aagataacct cagcgatcta cagcgcatta
    26221 atgcgttggg agccgcgtat taccccaaca aaaatcacgc tggaaacccg tggtgccgga
    26281 ctcgttgccg tcacacttca ggcacagcgc acagacaatc tggcggcatt tagcgccacc
    26341 atttcactac aggggacgtg atgagcggat tgattgattt atccttgctg cctgcccctg
    26401 atgtcgttga aacactggac tacgaaacgt tgtatgcgga acgcaaggcg atgtttatcg
    26461 ctctgtttcc agtcgagcaa cgtgatgcca tcacacgcac gctggcgctg gaatctgagc
    26521 cgctaaccaa gttgctgcaa ctgtctgtct atcatgagtt gttattgcgt cagcgggtta
    26581 atgaagcggc cagcgctaac atgctggcct acgccgccgg aagtgacctt gatctgcttg
    26641 ctgccaacgt taacgtgcag cgactggtta tcaccgcaga agacacagaa gcaatccccc
    26701 ccattgaagc ggtcatggag tctgacgccg atctgcgtac acgcgcgcaa caggcatttg
    26761 aagggctgag tgttgcgggg ccaaccgcgg cctatgaatt tcacgcacgt agtgccgatg
    26821 gtcgagtcgc cgacgccagc gcagttagcc ccagccctgc cgccgtcacg gtaaccgtgc
    26881 tgtcgcgtga aggaaatggc agcgccagtg atgaattatt gcaagccgtt gctgctgcac
    26941 tgaacgccga gaatgtgcgg ccggtagcag accgtgtaac cgttcaatcc gctaacatca
    27001 ttccttatga aattgccgcc gcgctgtacg tctatccagg gccagaagct gagcctatcc
    27061 gaattgcggc agaaacccga ttgcagacgt atatcaccgc acagcatcgg ttaggccgtg
    27121 atatccgccg ctctgccatc ttcgccgcac tccatgttga aggtgtacaa cgtgttgatc
    27181 tggaaagccc agccgcagat atcgtgcttg ataaaagcca ggcgtcttac tgcgctaact
    27241 gggtgctgaa tatcggggga tcagatgaat aacagcctgt tacccgtcgg ttcatctgag
    27301 ttggaaattg ccgcagccaa agcctgcgcg gaattatccc gcacgccgat tccgttacgt
    27361 cagttatgtg atccagaaag ttgcccgtca aacctgctgc cctatctggc atgggcattc
    27421 tctgttgatc gctgggatga aaaatggccg gcagtcatca agcgccaggc gataaaaagt
    27481 gcctacttca ttcatcgtca taaaggcact gtcggcgcgc tacgtcgcgt ggtcgagccg
    27541 ttcggctatc tgatccgaat tatcgaatgg tggcagaacg gcggagagcc aggcacgttt
    27601 cggttagata ttggcgtgca agacagcggt attaccgaag aggtttttaa cgagcttgag
    27661 cggctgattg ccgatgctaa gcctgtgtcg cgtcacctgc tggggctgaa tatcaacctc
    27721 gacactcaag gcgcagctta tgtctctgcc actagctaca gcggcgacac gcttactgtt
    27781 tacccctact ttcctgaaac cattaccgct agcggattag atgtcgtcgg cgcaggcgtt
    27841 cacctgattg atacgatgag agtaacccaa tgagtacgaa atactttgtc ttactaacga
    27901 atattggtgc cgccaaactg gcaaacgcca ctgtgctagg ttcgcatctt gatatcacgc
    27961 atatggctgt cggcgatgga ggcggcacgc ttccaacacc aaacccagca caaaccgcac
    28021 tgataaatga aaaacggcgg gcaggcatca acacactgag tatcgaccca gtgaacgcca
    28081 accaaattat tgcggaacag gtcattccag aaaatgaagg gggattctgg atacgtgaaa
    28141 tcggcctgtt tgatgctgag ggcgatctgg ttgcgatagg taactgtgcc gaaacgtaca
    28201 agccgttatt gcaggaaggc agtggccgca ttcagaccgt gcgcatgatt ttgattgtca
    28261 gtagtaccga tgccgtaacg ttgaagattg atccggctgt ggtactggca acacgcggct
    28321 atgtggataa tgttattgac gcgcatgaaa aaaaccgtaa acacccagac ggcacgttaa
    28381 acgcaaaggg attcgtgcaa ctgagcaacg cgacgaacag cgacagtgag ctgttggcag
    28441 caacaccaaa agcggtgaaa gcggcgaatg ataacgccaa tgggcgtgtg ccgtctggcc
    28501 gcaaggtgaa cagcaaagta ctgacggcag acattaccct caccgccgcc gatgtggacg
    28561 cgtacaccaa agccgaaacc gatacccgcg tcgccgctgc cactactgcc gcgaacaatg
    28621 ccgctacggc agcggctaac gccaacacca acgctaatgg ccgtgtaccg tcaggacgta
    28681 ccgttaacgg caaagcgcta tcggcagata tcgcgctggg tgccggagat gtaggggctt
    28741 acaccaaagc cgaaaccgac acccacgtca ccgcagcaac caccgccgcg aataatgccg
    28801 ctacggcagc gactaacgcg aataccaatg ccaatggacg tgtgccgtct ggccgtaccg
    28861 ttaacggcaa agcgctgtcg gcagatatcg tgctcactgc tggtgacgtt ggtgcgctga
    28921 ctgcgggtgg cgctgcggct gcggctacta agcttgctac agcccgaaaa atcaacggcg
    28981 tggcatttga cggtacggca gatattagcg ttgattctga atggtcacag attaaaaacg
    29041 ttcccgcggc atcatatgac gtcgcgggtg tggtggtgtt gagctcgtca attaacagta
    29101 acagcagaac tattgctgcg acagcgcagc agctttttac ggctcactct attgcaacta
    29161 acgcgcaggc aaaagcgaat gcagcgttgc cagcggatgg aactgcggcg gcggcgacta
    29221 aattggcgac ccctcgcaaa attaacggcg tgacgttcga tggtacgaca gatattaatc
    29281 tacccagcga tttccctgtt ggtgcccctg ttccatatcc atcagcaacc cctccggcag
    29341 gctggataaa gtgcaatggg cagtcattca ataaatcagc atatccgcaa ttggcaacgg
    29401 cctatccgtc aggcgtccta ccagacttgc gcggcgaatt tgttcgcggc tgggatgatg
    29461 ggcgcggtgt tgatactggg cgtgggctgc tgtcagcgca gagcgacgca ataaggaaca
    29521 taacaggtga atttcaggtt gttgatagac agaactatgt accatccggt gcattttcat
    29581 attcaaaccg ttcgggggca ggaattagcg ggaattttgt tggcgtttat cactctgatg
    29641 tctcatttga cgcgtcacgc gtcgtaccca cagctaacga aaaccgcccg cgcaatatcg
    29701 cctttaacta catcgtgaga gcagcataat gagcaactat tcaacacaaa tcaaaaacgc
    29761 agaactgaac gaccgtgggc tggcaatgaa ttctggctgg attacggttt atcacgttaa
    29821 ccccgttacg cgagagtatc agagcgccag ctatgaatac gtcatgcagg gtgttggcct
    29881 acctgctgac agctacgcag acgaaccgca attgccgcca gtcggcaaag ctctgagccg
    29941 cagcgctgat ggtaaagcgt gggagcaggt gccagattat cgcggccaaa ctgtctacaa
    30001 cacggaaaca cgacaggcac agaccgttag ccagttcggc gaactgcctg ataacgtcac
    30061 gctgctgaaa ccttcatctg aattcgacgc atggaacggg aaaaagtggg tgatcgataa
    30121 agaggtacaa gccgccgccg cgctcaaggt tgcccagcag gaactggcta cgcgcaaatc
    30181 tgcggcaacg tcgcgcatca acgagctgac gtatgctgtt aatttggata ttgcgaccga
    30241 tgaagagaaa gccgcactga ctgaatggca gaaatatgca gtgctactga gccgtgttga
    30301 tgtgagcgct acagatatcg agtggccaac tgcgccggat gctgaattga tcgctacagc
    30361 cgatcaataa cgcttaatcg atctgtataa acgtttataa aacaatcacc caaaatgtca
    30421 ttatgttgtt ggttttaaaa taataatgat acatcgggga aagcgaagcc cactgttagc
    30481 cagacagtgg gcttttttta tcgatcacag ctagaagcgt ctgtgtcaca agggcaagcc
    30541 gatatccata tcgccaagca tttcccgcaa atcctcgcta acccgttcca gattcagcgt
    30601 aaatgaaata tgccgtgctt taccgtcatt aaagaactca gaacgggttt cgttaatgct
    30661 ggttatcaca tacataccgt agatgttgcc tgtcccctcg atcagcggcc aggctttccc
    30721 tgtgtaggcc atcgtttgca gcatgttcaa cgacacatcg ccgccggtta tttctgggta
    30781 cagttcacca gccagcgtga ttttatcttc ccctgcgccg atatactgat aacgcgggga
    30841 tttaccgact cggtcattct taacatgtcg ccagctgctg tcatggctca gggattggta
    30901 cggtgcagtt tgccgcatga aaacgaacat acccagaatc atcatcatga taaaagccct
    30961 atacgtgatc ggttagttgt gagcgctggc gacgctgctt acggcgttca atatcgtcga
    31021 tttcccgccg cagtctggcg acgagtttgt cttcatccag actgcgtgca tcctgaatcg
    31081 tgatattgat ttcatatttg tctgtgctgg ccataccggc agacatcgct gttttcatct
    31141 gtgctgcagg tgaattgatg gccggaacgt ctgccccagc aggttgcacg gtgaacggca
    31201 ggacagaagc ggccagcaca ccggcggttt gcttcacacg ttcgagtaag ggaattttgg
    31261 gctgtgcagg cataacctgt gattcacgat agccgttcgc cagcatgacc gcagggggta
    31321 cgtttttaaa aacgatatca cccagcttgt tcgggtcttt cttctcttct gtctttgctg
    31381 tgctgcctgt tttttctgtt ttgggattgc tccccgtcaa gtcctgcaac accccagttt
    31441 gtttaggctt attgccttcg cttgccggtg gttttgctgc ctcaccggtt ttaatcaccg
    31501 catcagcttc tttggggggc tgtggtttcc attcctgcgc caccattttc ttttgtttct
    31561 tatcccatac gtacataacc ggctttttag attcatagcc tttttgtggg attgccccat
    31621 tcatggcatt tgatgcagag acggcggcat ttgcggcttc agggataacc cctaattttt
    31681 ccagtatcca gccaatgcct tcagcaactt tcaaaataac cgtcactaca ccactaatcg
    31741 ccattccaac tacttcacca aacactttcc ccgcttccgt gcattgtttc agtgattccg
    31801 atgaggcgtt gaccggttca aatagttttt tgaaccagtc ccatacacca ctaatggcct
    31861 gtccgatccc gtcgaaaata ggcgataacg cagagaacga ttgtttaaca ggctcaagac
    31921 cagcaacaag accactaaaa tagccactga aaaacgcttt gatcggctcc cagtatttgt
    31981 aaattaatac accagccgca acgattgctg cgccgattaa gccgatggga ctgagcaaca
    32041 gcatgaagcc ggtacgcagg atattgaata ccgccatccc tgaaccgctc agtgcagaaa
    32101 atcccgatgt cgccagcatt cgcacgccat tacccaatgc cgatagcgcc gcacctggct
    32161 gagtgaatac catcaacaag gaacggccag cgccttgggc gatattgccg atgccaccga
    32221 taccactgcg tatactggta aggatgcccc cccacgcgcg agtgctggac aggctacctg
    32281 tcataacgcc gctaagcctg ctgaacatac ttgtaacggt gccaataccc ttaccaccgc
    32341 ttaacaggga taggccaagt tgcagtttgg aaaatggccc catcaatatg ccagtcgcaa
    32401 gagagacggt gccgatggcg gcggtgagcg ctaacgcgcc acccacaacc acaagcagtg
    32461 tttgagccaa ctcagggtta gctgtcaccc attcacggac actattcact aacgccgtcg
    32521 cgccctgagc cagtttgcgc aaaacgccgg agtcattttc aaagatggca aaacgtaacc
    32581 cactcagtgc accaccgagc ttgtcgatat cccccgacag gttatcgcgt aacgtgctgc
    32641 ccatacgttc ggccgttcca ctgacatcgc tgaactggtc tttggtattg gctaacgctg
    32701 acaggaaatt agggatctga tcgatagaca ggtcttctat cggtgtacca aataatgcaa
    32761 tggcggcatt ggcccgttcg gctgggtctt taatcttcaa tagcccctgc gcggtttgct
    32821 gcatcgcgtt acgtgcttgt gcgccaccgc tggcgatggc agatgacgcg cgctgcgcat
    32881 tcagtccgat ggcgtcatac gccgcgatgc tggacttaga catatcagag ccacggattg
    32941 agaactcttt gactgcatcg cccgttttat ccagcgcaaa tttcccttgc tgcgccatat
    33001 tgaccaatag cgtcatagct tctgatccgc tgtagcccat attcctgaaa tgcgttgaat
    33061 actcatgcaa tatctcaggt aactcgccgc gcatctgtgt agacacgcgt tgcattcctg
    33121 ccgccatcaa atcgaatgct tcatcgctgc tgcgagccag accattcttc atcatgatgg
    33181 cggcaatctg gatatgttcc gccgtatcgc cgcccagcac ggattgcata tccaacgctt
    33241 tgcgtgagat ccggtctaat tccgcttcac cgacgtcccc caatgcgccc agtgagctac
    33301 gcaccgccga tacggtgctg gcgatctggg caaggtcatt gcttacaccg gcactgttaa
    33361 tccctttaat gattttcgaa tactgcgacc ccattgcagg ggcttcggca ttttgtgcag
    33421 caatcaccgc gccgctttta tctgattgca gattaggggc catcattctg gcaccgacat
    33481 acgcaccggc tgcgctggca ccgattgcca ttgcccctgt gctgcgcaga ttccccgctg
    33541 tctgctgcat cctatcgtag cgtgctcgcg cctgcgtcac cgccgccaac cgccgttgct
    33601 gttccgctaa catacggtta tagcgtgcgg tttgatcgct aatctggtct gttgccctgc
    33661 ggctgcggtc gagtatcacg ccgtgccgcg ccagctctgc ccgcagttgt tttaactgtt
    33721 cggtttcgtt ggtctgagcc gttgataatt gcctgatcag ctcacgctgc cgtttcagtg
    33781 ccgcgttttg ttcgtccgtt cgcgcactgg cggcaccgaa ttcggcacgc atcgcggcgg
    33841 ctttggcttt agcttgttcc agttcgcggg ttgttttagc ggatgcagcg ctcagacggt
    33901 caaagctgct ggcctgccgt cctaatccgt tgagggtgtt ttgtgttgct ctgatttggt
    33961 cagccagcgc cgccgtgccg ctgcgtgcag cactgacggg ccgagccata ttattgatcg
    34021 cgctgaacgc cacgcgaata ttgagattgc gatctgtcat tccgagtttc cgcttctaac
    34081 ggccgctcgg ctgcgccatg ccagcagttc atctaccggc atggcgtcca tcgccgacgg
    34141 caaccaatgg aaaattgctg cgatgtcggc catcacctct tcaacacagt taaacgggca
    34201 gtgaattacg ccgttaccgc gcccgtctcg ctcgctgggg aagagggttg caaaaaagtc
    34261 gccaccgcat tggagagctg gcaaaaatcc caggtatcca tcgctgtgag ttcttctttc
    34321 gtcagcgccg gactggtaac gcgcgggagc aacgtcagca ggctatccac atcggacgtc
    34381 atcacatcgt agaccttcag cccgcgcagc gatccggcct gttttagtgc gccggtgatc
    34441 gtgacttctt tcacatcacc gcctttacgt gtgatcgggt tttgcagaat gacgacgtta
    34501 ttttgtttct cagtcatggt agacatttcc ttttataacc caacgttagc gcggtgtttt
    34561 tccagtatat cgacaccggc cactttataa atcatgttca gcacatccac ttccatgacc
    34621 tcttcaccgc tgatcgtcag cttgaagtag gtatttttca gggtgtattt atgtgccgta
    34681 tcttcaccca ctttggcaga gcctgggtca agctcggtaa accggccacg cgtctggatt
    34741 tcacacggca ccgcttcgcc tgtggcttca tcctgatatg aacctgcaaa gcgcgtttgc
    34801 ataccgtccg cagtggagac gccccacttt ttcaacaggc cagcatccag cccgccgagg
    34861 gtgatttcca tatccagcgc gcccgcatca aaaccgaagt caatcgcgac aaagccaggc
    34921 ataccgcccg cctgatagtc ttccgtcttg cgcgtgagtt tgggcggagt cacttccggc
    34981 acctggccga aatagttgtc accgtcgata aacagattga agtatttaag tttctttggc
    35041 agagacatga tttacccctt acccgctgaa cgtattagcg aacgtcgcga agtattcgtc
    35101 agtaaactcc tgcaccagat ccaagtgctc caatggcgga acgggtgtgt agttgtactt
    35161 gatggttaat tttccggtgc gtagcgtttc gccggtgttg gtttctttgt cataccaaca
    35221 attcgcaccc agcagacggc cagcggtgac caacgccgtt aacttgcggt tgatgccgtc
    35281 cacaatatct tttgccagtg atggcgtaag cggcttatca atgtagaaga aatgcgcttc
    35341 tgcgatggtg tctgcgagga tttgcgctgt acgggtgtag ctttcaaaca gataggtttc
    35401 acgatcacag gtgcgtgatc cccaaaatcg aaagccgttt tgcttaatca gcgtggtgat
    35461 gccgttgctg ttcagctcgt cggcgtcggt atcggttcct tgtagcgtga aatacacatc
    35521 tttgctcagt cccagcacac cgtttacggc aacgttggat aacaccttgt gccagcccgt
    35581 ctccgcatca attttggcgc gcaggccaac cgcaaacgct ggcgcaggta cgattacgct
    35641 ttcccctttt gcggtgtcgt aggcgataaa gtcaggccag atcaccatta gttcacgttg
    35701 ggagaaattt tcacggtatg ttttcgccgc cgcgatagtt gcgcagtcat gcgcactgac
    35761 ataggcgaac gcgtttagct tttcagccat tacggccaac tgtgcggcaa cggcttgagt
    35821 gtccagctca ggcactgcca gtacacgcgg acgaacacca atacgcgcct ctgccgacag
    35881 cagcgcatac agccccgtat agcgcccgtt ggcatcggaa ccgccgatca ctaactgatc
    35941 ctgagtcggt ttaggttcat tgccttctgc gggcgcgttc gccgcatctg ccacacggat
    36001 caccaccgtt tgagggctgg cctgatcgga aatgcatttc agcgtggtgt gtaacgtgcc
    36061 tgttttaccc gctttgccca atacgctggc aacacgggtt aaaagtaccg gttcgtttaa
    36121 cgggaacgta tcagcgtcgg catcatcggc agtacacacc acgccgatca ctgccgagtc
    36181 gatatcgtta atgatggtgc tgagatccgt tgtttctcgg acggtcacac cgtgatgata
    36241 attagtcgcc atgcttgttg cctcaatgcg tcaaatgtcc ggcttcatga ttgcgggatt
    36301 tcgctgcctg tgcacggcgt ttgctttgtt ttaggagcgt gacaaccgag gcaggttgtc
    36361 cctacgcgcg cgtaacgcga gtattcaggc agagatcagg gggtaacaat gtcaatcatg
    36421 gacacgctag gggctatttc tggacggctg gacgaatact caccccgtcc ggcgtttatg
    36481 gtgagggttg gcgataagca agttacagag ctgaatgatc ggctgatgtc attatcgctg
    36541 acggataatc gcgggtttga agctgactca ctcgaattag tgctggacga tgcagacgga
    36601 aaattagccc tgccggagcg cggtgcaaag gtcacggtgg cgctgggctg ggcgaatgaa
    36661 ccgctaatca gcaaagggac attcacggtt gatgaaattg cgcatcgtgg cccgccggat
    36721 cagttgacta tcagcgcccg cagcgcggat ttcagagaaa catttaacgt taagcgtgaa
    36781 tacagttggc acaatgtgac cgtcgggttt gtggtatctg ccattgccag ccgttacgga
    36841 ctgaaagccg gtgtgacaga acggctgtcg aagctggaac ttgaccatgc tgaccagacg
    36901 aatgaatcag atatcagctt cctcacacgt atggcagaaa tggttggggc aatcacaacc
    36961 ataaaaaacg gtatgttgct gtttattgtt ccagggcagg cggtttcaca aagtggcaag
    37021 ccactaccgg ccatcaccat tacacgcagt agcggagaca gtcacagctt ccgcgttgct
    37081 gaccgcgacg cgtacaccgg cgtgaccgcg tactggctgg atctgaattt tggcaagacc
    37141 aaaacgacaa aggtaaaaaa taaacgcaaa accagtacgc cagctaaaaa gaaagaaccc
    37201 gcatccagca gtaaagaggg gaattatctg aagggaacgg aaggtaatgt ttatgtcatg
    37261 cgttcgacgt ttaaaaccga gcaagcggca aaacgtgcag ccgcagcgaa atggtcgaag
    37321 ttacaacgcg gtgccgcaga attcagtatg acgttagcgc gaggccgtgc cgatttatat
    37381 cccgaattac acgcccgtat gtctggattt aaaacggtta tcgacaatgc cgattggata
    37441 attacacgct gcgtacatga aatcagccaa tcaggattta cgacatcgct ggaatttgaa
    37501 gtgaaaataa cggattgggc agcagacgat aatgatgatt aatgcaacgc ctgtgtataa
    37561 tgacagtaac accaaccgtt tgagaggttg tcatggcgat caaatgtcca aagtgccgcg
    37621 caactgcaaa aacacgtacc agcgtagaac ttagcccatt ggttcgacgt agctatcacc
    37681 agtgccaaaa catgatgtgc ggctactgct ttaccagcat gacgcatatt gatgaagcgc
    37741 tgaacgaaac gaagcccgcg cctggcgcat gtgtccccac caatatcttt ccccgtagcc
    37801 acaaggggga aaatcagttg gatttagctc tataaatcat taagcgccag aaactaaagg
    37861 ttagtaatgg cgcttaacta ctggtactaa tgcagaagtt caggaaattt tttttcaacc
    37921 atggaaaagg cattagggca ctgttttttc agcactacat agtcaactag gcatctatca
    37981 acttttttat cttgccctac agaataagtg ctatcaacca gcgaggatac aggatccaag
    38041 tgaatcgcct ttgacatttg actgctaaaa tccatcatgt cagataataa ttgagtcgaa
    38101 caatgttctg ccccttttat cattaactca ctcaagtcac tgttgcagtg taatggtgca
    38161 ttcagaaagg cggatgtcaa ttcttggcga acttcgatgt agcgatggtc aaacaccttg
    38221 cttccagcaa aaactccaat cacgcctaat gccgtacata aaccaaacca caatgaattc
    38281 atgttgagtt caagtctccc caacatgaat gaaatcgtta ttccccaaga tattccgata
    38341 ccggtcaaca aactccctaa accgctccat atatttccgg caataaagta catagttgca
    38401 gcatagatgc cacaacaaaa aggagtaagg cagcataagc cttttaagca acacttaatt
    38461 ttatctaaag aattaatgcc cattatcact actcattctg aaggctgctg ccactctgct
    38521 gccatcttgc tgccacttgc cctttttcag gcacaaaaaa accgcctttc ggcggtctac
    38581 gacattgcac ataagtgctt attttaattc gtgttaaa
//
