# Supplementary material for: May the Phage be With You? Prophage-Like Elements in the Genomes of Soft Rot Pectobacteriaceae: Pectobacterium spp. and Dickeya spp
Source: Front Microbiol. 2019 Feb 14;10:138. doi: 10.3389/fmicb.2019.00138 (PMC6385640; doi:10.3389/fmicb.2019.00138)
Supplement: Supplementary file 2 [file Data_Sheet_2.ZIP › Supplementary_prophagesGENBANK_files/Genbank FILES _SRP_prophages/phiPcc1.gb]

LOCUS       Exported               36461 bp ds-DNA     linear   UNK 02-AUG-2018
DEFINITION  phiPcc1.
ACCESSION   .
VERSION     .
KEYWORDS    .
SOURCE      phiPcc1
  ORGANISM  phiPcc1
REFERENCE   1  (bases 1 to 36461)
  AUTHORS   .
  TITLE     Direct Submission
  JOURNAL   Exported Aug 2, 2018 from SnapGene Viewer 4.2.3
            http://www.snapgene.com
FEATURES             Location/Qualifiers
     source          1..36461
                     /organism="prophage phiPcc1"
                     /mol_type="genomic DNA"
                     /note="/genome_id=6666666.357187"
                     /note="/genome_md5="
                     /note="/project=robertczajkowski_6666666"
                     /db_xref="taxon:6666666"
     CDS             1..1416
                     /codon_start=1
                     /product="hypothetical protein"
                     /label=hypothetical protein
                     /db_xref="SEED:fig|6666666.357187.peg.1"
                     /translation="MNELLNVNEQRDNDELDYNQVITSEWTQLIATTSQKSFNLLRAIS
                     EQKASDFADKFYSYMLKDQEASLFLSSQQVHDRLHGSMSKWIADILTNTGEHLVDLINH
                     QKKIGQIHARIGIPVDLVERGARRLKWHLYEDIAQVAEDKALCFDAMRFASISMDIAIE
                     IMSKTYSQSHDLAAKNEESYRLFSILENASMERERQNASLLNWENAFIFSVATGTPLSS
                     IQDLSDSEFGLWFNHKGKSSFSNIQGIRTIASIITETDEYIRGYSTTALLTQQDYAPLL
                     KAVRSKIYKINMLLGSLFDEVQKLESGKDTLTLLLNRRFLPTILRHEISLAMHSSTPLS
                     IAMIDIDHFKTVNDTYGHAAGDNILKRIAEVLYESTRNSDYVFRYGGEEFMIVLIETPK
                     VAAHTIIERLRKKIQDHPIHLQNGESITMTISAGIAVYSGHPDYECLIKAADDALYQAK
                     ANGRNRIEYAQEE"
     CDS             1692..1910
                     /codon_start=1
                     /product="hypothetical protein"
                     /label=hypothetical protein
                     /db_xref="SEED:fig|6666666.357187.peg.2"
                     /translation="MQRQQVSSSRIYSIGYDPKTHSLEIEFHNKEIYQYVGVPESIYKK
                     FMSDAVVSKGRFFDGVIKDKFLCRKIR"
     CDS             2130..2486
                     /codon_start=1
                     /product="hypothetical protein"
                     /label=hypothetical protein
                     /db_xref="SEED:fig|6666666.357187.peg.3"
                     /translation="MIASDIQGANSLFAQTNKHAIVPDEDTFKIALEKAKESGQISRHE
                     PSAKVEPQRSKAAQEFMDWVSMSHEERLFFSVLASMGISKEQYEAMPLEERMALDLKVQ
                     ERIKEMAEQDQQLA"
     CDS             2795..2911
                     /codon_start=1
                     /product="hypothetical protein"
                     /label=hypothetical protein
                     /db_xref="SEED:fig|6666666.357187.peg.4"
                     /translation="MLVLILFKSMVPGAGLEPAQRERRGILKSYTTLNKTIG"
     CDS             complement(3005..4012)
                     /codon_start=1
                     /product="Phage integrase"
                     /label=Phage integrase
                     /db_xref="SEED:fig|6666666.357187.peg.5"
                     /translation="MSVSKLPSGKWLCQCFPYGRDGKRIRKQFSTRGEALSYERRLMAD
                     KKGIDTTTSNITLKDLVQRWYDMHGKTLSSGDSRYTKLLAICERLGDPFAIDVDKNMFA
                     VYRERRLKGEWNPKGKAVLKEATVNREYSYLRAVFSELKRMGEWDKENPLDGIRQFKEG
                     DQELAFLYPEEIKRLLAACDESDNKDLGIIVRLCLATGARWSEAQDLKQSQILPNRVTF
                     TKTKGNKNRTVPISEKMRSLLPKKRGALFTPAYESFKYAIKRAGIELPSGQLTHVLRHS
                     FASHFMMNGGNILVLQQILGHSTITMTMRYAHFSPDHLDAAVTLNPFDSLEIDK"
     CDS             complement(4033..4863)
                     /codon_start=1
                     /product="hypothetical protein"
                     /label=hypothetical protein
                     /db_xref="SEED:fig|6666666.357187.peg.6"
                     /translation="MTDENTSENDKSSGNNKVAETINAVTGLTQSVPVYQDLIQPAAQE
                     LGKGLAVIAKSINVALSPLSVMVWGYEKIQDQFMPKVAEKLKNTKPEDIITPKPNVAVP
                     AIEALRYTADDESLSDLFAGLLSSAMDKNKAETAHPAFVEIIKQLTSDEAKIVSIFLPP
                     RPIPLVDVQIVKKDVLGFTPYFSNYSLIHEDVNLEHPELLPTYINNLCRLGLSKVPDDG
                     SKYIDEKIYLPIENSPFIKKLIAKPAVDGKSFSIKHKVFMITELGHQFYRACVK"
     CDS             complement(4912..5514)
                     /codon_start=1
                     /product="hypothetical protein"
                     /label=hypothetical protein
                     /db_xref="SEED:fig|6666666.357187.peg.7"
                     /translation="MTVEAQGDSNRVAGRDYYEKNINIAAPQTKEDLRPLVSAQRSQLN
                     QLVKDIAEAGREEARFVWRRLHAELGVNGIEEITISQYSTALSFLNALHDRSREKDANK
                     KLVSQLLRSTQQNELREQLTRFCHINFGTSRLIDLTRPQLQQAMGWLDERQGRTTPNAL
                     PPKVQTWQDAVNTLKAEPRVFGAVLAAGIVLGMLLAH"
     CDS             complement(5530..5694)
                     /codon_start=1
                     /product="hypothetical protein"
                     /label=hypothetical protein
                     /db_xref="SEED:fig|6666666.357187.peg.8"
                     /translation="MKMLANIIIAYINKDRRAKCILIKDGHEMPVEAPTTQELMALIDK
                     IQSQDNSDQ"
     CDS             5858..6121
                     /codon_start=1
                     /product="hypothetical protein"
                     /label=hypothetical protein
                     /db_xref="SEED:fig|6666666.357187.peg.9"
                     /translation="MFMLLIVPESFSGKCRTFFYVIKAAFRVFNPNFRILFSPVDNHTD
                     LEEVTSVCDCVPIYLRVRLEDPERLARAINELRREKAESSRD"
     CDS             complement(6166..6579)
                     /codon_start=1
                     /product="Transcriptional regulator"
                     /label=Transcriptional regulator
                     /db_xref="SEED:fig|6666666.357187.peg.10"
                     /translation="MSTSKEEFLFLIGGRLREERETIGKSQSAIAEELGTTTRTWGKYE
                     RGETAPDGATLAFLSENYGMDTLYILTGKRTPDLGDISNDELELVKIYRAAPLAIKAAA
                     LAALTAGSSATASINVTGSGQRVAGRDYHEGKK"
     CDS             6640..6915
                     /codon_start=1
                     /product="hypothetical protein"
                     /label=hypothetical protein
                     /db_xref="SEED:fig|6666666.357187.peg.11"
                     /translation="MTQENHDLSAQSNTGDRAVGAEIEAQKRPKIFSAGLSDDELIEFL
                     RDLINTLEARKYFNDRPKELRASADAAEKELTRLNTLINVSVDQHS"
     CDS             complement(6887..7348)
                     /codon_start=1
                     /product="hypothetical protein"
                     /label=hypothetical protein
                     /db_xref="SEED:fig|6666666.357187.peg.12"
                     /translation="MDLNLTNAFRVFENTIKNVVSHLNVNDNERFGYELEHYISNRSFI
                     IFKLDVMLFEYRESLDKHRLALFGKNALIHYLVNKKNISLTEAKNIEFHDAIVILWDDI
                     SDYKISDEIISYINRSYSFSNHDISIYYERYKGYSYDEWDANYADRRLR"
     CDS             7468..7659
                     /codon_start=1
                     /product="hypothetical protein"
                     /label=hypothetical protein
                     /db_xref="SEED:fig|6666666.357187.peg.13"
                     /translation="MTVISEQRSRLPRGIASKNPTPMRLSDDERDKLAALAAQESRSLS
                     SMARLVFLRGLESFNSQG"
     CDS             7671..7883
                     /codon_start=1
                     /product="hypothetical protein"
                     /label=hypothetical protein
                     /db_xref="SEED:fig|6666666.357187.peg.14"
                     /translation="MAKALNINITVPTPYVSLKTYSEMTGIPLRTCEGMVSDGRIIIRP
                     KKARMEKVEVNLIAMLRDAITNSEI"
     CDS             7886..8116
                     /codon_start=1
                     /product="hypothetical protein"
                     /label=hypothetical protein
                     /db_xref="SEED:fig|6666666.357187.peg.15"
                     /translation="MEKNRLVFFGIDHALIKVSEHTSVYRGFSIIRCPRTATNPITRYR
                     VSQGDQSFGLFDALGQATSYINELHGMRDSA"
     CDS             8113..8313
                     /codon_start=1
                     /product="hypothetical protein"
                     /label=hypothetical protein
                     /db_xref="SEED:fig|6666666.357187.peg.16"
                     /translation="MISTARLLKEQSPSPRQENKGWLELPSGQRFQPTPAQAYFAPWSK
                     KPYMPAPKKRRWFARLMGIAA"
     CDS             8319..8681
                     /codon_start=1
                     /product="Phage protein"
                     /label=Phage protein
                     /db_xref="SEED:fig|6666666.357187.peg.17"
                     /translation="MANTEAARAVPLSIAVRTDGLNHIAMLRGKYFNTNSEKEMCRFID
                     DLRDERFYDGNRKDRKSTHSDNMRVLSAIFELADIDKERHNLKFNELTTEEKAKLIKAM
                     NKLKAVVSLFPKHLIL"
     CDS             8751..8990
                     /codon_start=1
                     /product="hypothetical protein"
                     /label=hypothetical protein
                     /db_xref="SEED:fig|6666666.357187.peg.18"
                     /translation="MRNAEVKQMQVAGSDVDVLVSLLGKARLEEKKSQHWEFSQRLAAL
                     ALYAQQKGYSAVEVIELLRKEAERFEHSSQEIIV"
     CDS             8987..9565
                     /codon_start=1
                     /product="Exodeoxyribonuclease VIII (EC 3.1.11.-)"
                     /label=Exodeoxyribonuclease VIII
                     /db_xref="SEED:fig|6666666.357187.peg.19"
                     /translation="MNNVMIDIEALGKKANAPVGSIGAVFFHPVTGELGERFYCRVDFE
                     NDMLNGAVPDGDTIKWWLRQSSDARAELISDDATPIWGALSEFSDWLTDYAESLETLHV
                     WANSPSFDCTILKTAFERTDIDVPWNYWNERDVRTMKEAGFAIMDMGRFLSTAETIGVK
                     HNALDDAISQVALVSAVMSRLVQNSGGEL"
     CDS             9562..10404
                     /codon_start=1
                     /product="Methyl-directed repair DNA adenine methylase (EC 
                     2.1.1.72)"
                     /EC_number="2.1.1.72"
                     /label=Methyl-directed repair DNA adenine methylase
                     /db_xref="SEED:fig|6666666.357187.peg.20"
                     /db_xref="GO:0009007"
                     /translation="MIRPFIKWAGGKTRVLPDLLPLLPKGDRLFEPFVGGASVFLNTDF
                     PRYVLADINADLINTYQIAQEATQIFIRTARELFENGNSSAEYYRNRKTFNAIHDDERL
                     LKAALFLYLNRHCYNGICRYNNAGFFNVPFGDYKKPYFPEAEIKLFAEKANDTTTCFIA
                     ADFRKVLAAKAINENSVIYCDPPYLPASDTANFTQYHHAAFTREHHHDLAGGLLNLNRS
                     RGVPVVISNSDTPATREIYQHYQFHEIAVQRSISANGITRGATKEVIGVLNARKLRHA"
     CDS             10397..10690
                     /codon_start=1
                     /product="hypothetical protein"
                     /label=hypothetical protein
                     /db_xref="SEED:fig|6666666.357187.peg.21"
                     /translation="MRKAPTEVPKGLIRPSFPPSPPMTIIALENARRAQVLAIEISVSE
                     QRREDLTQLVLSEISDFFAGIGQPGEPETPEEMQTVLMARVQSVFSGSGTLK"
     CDS             10690..13200
                     /codon_start=1
                     /product="Phage replication protein # Replication gene A 
                     protein"
                     /label=Phage replication protein # Replication gene A
                     /db_xref="SEED:fig|6666666.357187.peg.22"
                     /translation="MAEQWAYPWNAPRPAISIPQGIADSFSPFATNTTEPHPAVEQHLK
                     RLVSRAAFSDLDFDQAVARLDYFEPNATLLTMRRQFAEAERDEHQATLQNWMETPEGVE
                     CRLLEQPFFIRDTYRKKIEWLRENRESRHVSAFFMGTVKKALLRLDAVRAKQGVRNGFT
                     SELASYWRARWMHLAEFTKHEAINAGHAIAASIAEMFETECGNTLPADMTNDDIQALFW
                     HLGREMLALRVTPPCWGVIIGDNESRNRIYSAILRITNADWWGRKLWRLRCEWRENQFR
                     AIGVIHKKRMQYVSIDALNQWQEQRRKNREFFKAHELVDEDGNVASLENMVYASVSNPV
                     IRRHELMTRMAGVEMVAISRSDEGVFLTITCPSRYHATIQSGHQNPKWDTSSPRQGQRY
                     LCKTWAKAMSKLNRRGLRPYGFRVAEPHHDATPHWHVLLFMPPEDRKEITEILREYFIA
                     VDRAELGRNTGARFKAKRLDPKKGSATAYVAKYISKNIDGYALDGERDNETGKPLRETA
                     KFAMAWASQHNIRQFQPFGLPPVTVWRELRKLANQLIAVQKEAGTFKRGTAQLADPAMD
                     AVLASADAGCFATYIEKQGGVLIPRELYTVRIAYEEADEQNDYGETPEKIFGVFSPRLG
                     ELSRICTRLVKWKIRKKQAADAGASDSAGRDLAVTSPAGDAWSSVNNSTGDEKVSISEP
                     ADREIGSTSEPEITDFEHMTDAELRGLLNRLRSQPPDRRHSEHSSTTQPHETTEKQTVS
                     KRSDDWRARIADFARSLGWDISAGEVRRLETGNAIALAGYAYVANGDGCLYRAPTKKQK
                     DAEYQDRAAALLQRIAVLRGGGFQ"
     CDS             13334..13546
                     /codon_start=1
                     /product="hypothetical protein"
                     /label=hypothetical protein
                     /db_xref="SEED:fig|6666666.357187.peg.23"
                     /translation="MAISPIQKQLAELEKKVEILDSIIDVAKTSGGRITDDGKNLIYIL
                     RNAGMNKTDIAKLLDVSPAALTKYD"
     CDS             13789..13917
                     /codon_start=1
                     /product="hypothetical protein"
                     /label=hypothetical protein
                     /db_xref="SEED:fig|6666666.357187.peg.24"
                     /translation="MRCIDLGQSRRCSVIDVLKMAFMRFYADVKKPGNLAAVRSAV"
     CDS             complement(13952..15019)
                     /codon_start=1
                     /product="Portal vertex protein"
                     /label=Portal vertex protein
                     /db_xref="SEED:fig|6666666.357187.peg.25"
                     /translation="MSRKKQHPRTANLRAPAAQTPVTGELIQQPIESLQSFSFGDAQPI
                     MDRRDLLDCMECARNGRWYEPPISTYGLARMFDVAVHHQSPILFKRNVIMSCYEPHPLL
                     SRQDASAFVLDWLVFGNAYLELRKNRFGQPLKLKHTHAKYTRRGENLDQYWFVTYYAND
                     HEFEPGSVFHVKSPSIHQEIYGTPEYMAVIQSAMLNGEATLFRRNYYINGSHAGVIVYL
                     TDPITNNADVEQLKKSLKDARGNGAFKNLFVYAAGGKKDGLQILPFSQIAAKDEFTGIK
                     DATRDDMLAAHRVPPNLMGIMPNNAGGFGDVEKAAKVFAINELMPIMESLKELNDWLGI
                     EVLRFKPYALAEGAM"
     CDS             complement(15022..16734)
                     /codon_start=1
                     /product="Phage terminase, ATPase subunit"
                     /label=Phage terminase, ATPase subunit
                     /db_xref="SEED:fig|6666666.357187.peg.26"
                     /translation="MNLLPDIRTEAKSLYWQAYSIPQIAQRLGVSNNTLYSWRRRDKWD
                     DSTAIQRAQERTEVRYLRLIEKDDLTPHDFKTIDLLGRQMARFSRDERKDQEKETRKKA
                     PKNHFTDEQIAELRALVLESLYEHQKRWYKKRKQRNRAILKSRQIGASWYFAREALLDA
                     LETGTNQIFLSASRAQAYQFKRFIQLLASSIGVELKGGDAIVLSNGATLYFLGTSAATA
                     QSYTGNLYFDEFFWVSNFLNLRKVAAGMATQKGLRRTYFSTPSSEEHEAYTFWTGDFFN
                     KSRPKAERVEIDVTHKVLKKGLLCGDNIWRQIVTIHDTLEQGFDLVDLNEIKSENSPDD
                     FENLYACRFVSVGERAFDYTALINCGVDGYNDDVWPDWRPYTQRPLGNRPVWIGYDPSG
                     DSGTGDSAGLSIVSPPAVPGGKFRVIEVRQLRGMTFEKQAEVIKELTHQYNVQFIGIDS
                     TGNGSAVHQLVVKFFPAAVKYQYSPSVKRELVLKAQMLIRAGRFEYDAGMMELARSFMT
                     VRKFVTQGGMTSYASDRTKGSSHGDIAWATMHALHNEPIGSESGGNDGFIQEF"
     CDS             16881..17726
                     /codon_start=1
                     /product="Phage capsid scaffolding protein # Fam Scf032"
                     /label=Phage capsid scaffolding protein # Fam Scf032
                     /db_xref="SEED:fig|6666666.357187.peg.27"
                     /translation="MPISKPFLAAVEGATCDGRTLERAHISQMAKNFNKQVRGARVNLE
                     HIRGYSPTSDFRAYGDVEEVSEFEIQDGPLKGKLALQIKIDATDDMVALNTKRQKIYPS
                     IEIHPSFADTGEAYLMGLGMTDDPASLGVGILEFNAKCAGKGPLDGRKTSPECFFTAAD
                     TPITLEFEEEAPAGEAGKNFFSRITELLTGSQQRFSKENGELKQAVELIAKSQRELLDK
                     TETFSALQAQNTELKGNVETLNKSLTELKEQLAGQDGNFSQRPPASGGNPQSGIVLADC
                     "
     CDS             17761..18810
                     /codon_start=1
                     /product="Phage major capsid protein #Fam0066"
                     /label=Phage major capsid protein #Fam0066
                     /db_xref="SEED:fig|6666666.357187.peg.28"
                     /translation="MKNETRVLYDAYINRQAELNGVQPDHVTKQFSVAPSIQQKLEDKV
                     QQSSELLQKINITGVSDQEGQKLGLGISGPISSSNTSSTDRREPKSVHTMDDDKFRCEQ
                     TNTDTFISYPQLDMWAKFPDFQQRISNQIIKRKALDRIMIGFNGTSRAAKSDLAANPLL
                     QDVNIGWLEKYRLHAAQRVMKNITVTSRDDENKVIAKGDYGNLDAVIYDAVNSLLDEWF
                     KSSQDLVVICGRQIMVSKEYPLINAINTNNPNSESLAGQLLVSRKAIGNLPTFIAPSFP
                     DGSMFVTPFSNLSIYWQEDKQRRAVRDEPERNRIATYESSNDAYVIEDYGTGCLIEGIT
                     FAAAAPAQG"
     CDS             18862..19683
                     /codon_start=1
                     /product="Phage terminase, endonuclease subunit"
                     /label=Phage terminase, endonuclease subunit
                     /db_xref="SEED:fig|6666666.357187.peg.29"
                     /translation="MLTPAQRHFQTVMAQRHGKSNGGDVEHTAYEQQLHRLRMDKSRLS
                     QVQSDATKAELKRALLPDYQGWINGVLAADSGQADAVLTTIMIWSIDAGLISDALRIAG
                     YVLRHRLPMPDHYKRTVATALVDEICDPALAAFKADASLAPLSAELLLQLEQLTNGEDM
                     PDQVRAKLYKTLGYTLRLDANELSAARDWLQRAVTLFDGIGVKRDIELLGRALKKATEP
                     EAGAENTDVPPKPPADKPADKPAAKATRAPRKSTAAKASRTTTPRARKSAS"
     CDS             19780..20286
                     /codon_start=1
                     /product="Phage head completion-stabilization protein"
                     /label=Phage head completion-stabilization protein
                     /db_xref="SEED:fig|6666666.357187.peg.30"
                     /translation="MSLIATEPVRPATQDTINDGDATVTSHAFWPVIVLSALRRAMRLD
                     GQVTTDRLMDKAIEAVAHVNGQLADWRNSQEQRGLAVLSEVKPDGADEIDQINGESVLV
                     WRYRRAVYSITKALLIEGYRDIDTTREGEKHAEALSSQIDTLWRDGRWAIRDILGVNRG
                     LAELV"
     CDS             20286..20489
                     /codon_start=1
                     /product="Phage tail X"
                     /label=Phage tail X
                     /db_xref="SEED:fig|6666666.357187.peg.31"
                     /translation="MEVRAQQNDTVDLLCWRYYGRTDGVTEGVYAANPGLCERGPLLPA
                     GLLVTLPDVTAATQQEIIQLWD"
     CDS             20480..20782
                     /codon_start=1
                     /product="hypothetical protein"
                     /label=hypothetical protein
                     /db_xref="SEED:fig|6666666.357187.peg.32"
                     /translation="MGLTTDRVASAITYLLATLIATAGRMTLSDWATLIGIAIGLLTFW
                     VNRNHKKNIERDQAQRTDLMRELVRKVDHENLPETLDALRVMNGQETGRRGRDAT"
     CDS             20772..21248
                     /codon_start=1
                     /product="Lysozyme (EC 3.2.1.17)"
                     /EC_number="3.2.1.17"
                     /label=Lysozyme
                     /db_xref="SEED:fig|6666666.357187.peg.33"
                     /translation="MLPEALKQRIIPVVTACALAIATVFVGFFEGKENTAYRDIAGVWT
                     ICYGHTGDVKAGDYKTDAECDALLQQDLKPAFHAIDRLVTVPLSELQRAALASFIYNVG
                     TGAFERSTLLKKLNRGDLIGACNELRRWNKAAGQVWQGLTNRREAERMLCLEKL"
     CDS             21230..21655
                     /codon_start=1
                     /product="hypothetical protein"
                     /label=hypothetical protein
                     /db_xref="SEED:fig|6666666.357187.peg.34"
                     /translation="MSGKVIATLAATLLFLAAIVLAEHYRQKSQRLSGEITTLIAERDS
                     AERVINNQQRTFQIFNTLSREAEHDKRQIQQDADTRSQTINQALAGQVCANEFVPDGAA
                     VQLLDYANRLRADSLRSPASEPNRTDGNTAAAGRDSQ"
     CDS             21688..22260
                     /codon_start=1
                     /product="Phage tail protein # FIG072132 and FIG003673"
                     /label=Phage tail protein # FIG072132 and FIG003673
                     /db_xref="SEED:fig|6666666.357187.peg.35"
                     /translation="MVCCWLHWRAPIKIKRSFDRLNNKESNNMLKAELLRKAISEQVPW
                     LRENPDQLVVYVQKGNAISTGARSASFEYRYTLEVLAMDYPHSIDTLMVPVLMWARIYQ
                     PDLLLNPERRKTGITFEADLLSNSTADLLIRIQADEAVIVTRNESGEINVRHRADPPPD
                     PMEGQDAWGLLVKDDVANTVIHDATAG"
     CDS             22263..22904
                     /codon_start=1
                     /product="Tail completion protein S"
                     /label=Tail completion protein S
                     /db_xref="SEED:fig|6666666.357187.peg.36"
                     /translation="MSENLFIELEKELQSLIGTTKPSYRKKLARKLGMAIRLDQQKRIR
                     QQKNVDGSSYAPRKKKLRRTQLGIRFLWNGEARTLSNWRSSKTSSGRMITGFDVDKGAV
                     RSFNRDDIERYLEINRSEKRQTVKRDYPMFRKLRTAQFLYAKAYPNAAIVEFKGKAADI
                     ARQHQYGLMGTVSALTKVRYPQRELLGVSPSEKVKLLNLVYHDLMDELRK"
     CDS             23003..23587
                     /codon_start=1
                     /product="Phage baseplate assembly protein V"
                     /label=Phage baseplate assembly protein V
                     /db_xref="SEED:fig|6666666.357187.peg.37"
                     /translation="MNSNEFDRLLNNLIRIGTVVDVDHSRFLARVVTGGNTTGWIRWCV
                     QRAGDAKTWWPLSVGEQVLMASPGGDLETAVIVLSLYSNQHSAPSSTPKVYTTDYPDGA
                     SETYDANTSTMTVKGVKNVIVEAAESITLDTPKVICTQHLSTQTLSVEKGGTMQGDITH
                     TGGQMSSNGVVVDSHTHGGVQRGGSQTDGPQ"
     CDS             23584..23943
                     /codon_start=1
                     /product="Phage baseplate assembly protein W"
                     /label=Phage baseplate assembly protein W
                     /db_xref="SEED:fig|6666666.357187.peg.38"
                     /translation="MSNEKYIGMNASTGRAITDDEHISQSVRDILITPVGSRVMRRSYG
                     SQLFSLIDEPQEPAIKLKITSAIYSALMRWEPRITPTKITLETHGAGLVAVTLQAQRTD
                     NLAAFSATISLQGAR"
     CDS             23940..24851
                     /codon_start=1
                     /product="Phage baseplate assembly protein J"
                     /label=Phage baseplate assembly protein J
                     /db_xref="SEED:fig|6666666.357187.peg.39"
                     /translation="MSGLIDLSLLPAPDVVETLDYETLYAERKAMFIALFPVEQRDAIT
                     RTLALESEPLTKLLQLSVYHELLLRQRVNEAASANMLAYAAGSDLDQLAANVNVQRLVI
                     TAEDTTAIPPIEAVMESDADLRTRTQQAFEGLSVAGPTAAYEFHARSADGRVADASAVS
                     PSPAAVTVTVLSREGNGSTSDELLQAVDAALNAENVRPVADRVTVQSAVIIPYEIAATL
                     YVYPGPEAEPIRIAAEARLQTYITAQHRLGRDIRRSAIFAALHVEGVQRVDLESPAADI
                     VLDKSQASYCANWVLNIGGSDE"
     CDS             24844..25452
                     /codon_start=1
                     /product="Tail protein I"
                     /label=Tail protein I
                     /db_xref="SEED:fig|6666666.357187.peg.40"
                     /translation="MNNSLLPVGSSELEIAAAKACAALSRTPIPLRQLCNPDACPLKLL
                     PYLAWAFSVDRWDEKWPEVIKRQAIKDAYFIHRHKGTIGALRRVVEPFGYLIRIIEWWQ
                     NGEAPGTFRLDIGVQDSGITEEVFNELERLIADAKPASRHLLGLNINLDTQGAAYVAAT
                     SYSGDTLTVYPYFPETITASGLDVVGAGVHLIDTMRVTQ"
     CDS             25449..27431
                     /codon_start=1
                     /product="Phage tail fibers"
                     /label=Phage tail fibers
                     /db_xref="SEED:fig|6666666.357187.peg.41"
                     /translation="MSTKYFVLLTNIGAAKLANATVLGSHLDITHMAVGDGGGTLPTPN
                     PAQTALINEKRRAGINTLSVDPVNTNQIIAEQVIPENEGGFWIREIGLFDADGDLVAIG
                     NCAETYKPLLQEGSGRIQTVRMILIVSSTDAVTLKIDPAVVLATRGYVDDAINAHEKSR
                     KHPDGTLNAKGFVQLSNATNSDSELLAATPKAVKAAVTAANNAATAAANANTNANGRVP
                     SARKVNGKELTADIALIAADVGAYTKAETDTRVATATTAANNAATAAANANINANGRVP
                     SARKVNGKALTADIALTATDVGAYTKAETDTRVATATTAANNAATAAANANTNANGRVP
                     SGRTVNGKALSADIALGAGDVGAYTKAETDTRVTAATTAANNAATAATNANTNANGRVP
                     SGRTVNGKALSADIVLTAGDVGALTAGGTAAAATKLATARKINGVAFDGSADIIVDSDW
                     SQIKNVPAASYDVAGVVVLSSSINSNSRTIAATAQQLFTAHSIATNALAKATAALPADG
                     TAAAATKLATPRKINGVAFDGTSDIDLNGSRVWISGEYTPATSTPIVVSHGLVGINPLH
                     CRCDVLVKCVVAEGEYRAGEFAINPMTLFMQQGVAHPYSLLPALNAGTVQLNIMHYLAA
                     SFKTSTIGNQQLNMANWRCILRIFY"
     CDS             27443..27592
                     /codon_start=1
                     /product="hypothetical protein"
                     /label=hypothetical protein
                     /db_xref="SEED:fig|6666666.357187.peg.42"
                     /translation="MDIQYWKHKDGWIYIGNEMEGARPATDEEINIHQRTVYLPDVVSH
                     AVSS"
     CDS             complement(27636..28682)
                     /codon_start=1
                     /product="putative acyltransferase"
                     /label=putative acyltransferase
                     /db_xref="SEED:fig|6666666.357187.peg.43"
                     /translation="MGSFSNQNGSSNNQLHGLTIFRFIAAFYVFVFHCQIRYPLDVPHF
                     ITRVINNGAVGMSFFFVLSGFVMAWSARNGIRSDYVKARISRIYPAYIFMGIISLPFLF
                     DVESGKLIPSLVLYFTGMQSWIPDSFFSWHFGGSWSVSTELFFYMVFPLILPLVNKNPK
                     ASLLIAYIVTSLIIPFVMVFGNSDKMPYFYISPIHRLPEFVIGMALGAMYINGFQLTLK
                     KHKLLLVGFSLLILLFVSPVGNYGFMKRNFATVLATASLVFVFACSKIEINSLTRPFVW
                     LGKISYSFYLMQIPIILFFVKYPSVFFGMENYQVWIVVGVFNLMMATISYYLIEEKFIS
                     KIKRMSFA"
     CDS             complement(28982..29404)
                     /codon_start=1
                     /product="Phage-related tail protein"
                     /label=Phage-related tail protein
                     /db_xref="SEED:fig|6666666.357187.peg.44"
                     /translation="MMMILGMFVFMRQTAPYQSLSHDSSWRHVKNDRVGRSPRYQYIGA
                     GEDKITLAGELYPEITGGDVSLNVLETMAYTGKAWPLIEGTGNIYGMYVITNINKTRSE
                     FFNDGKARHISFTLNLERVSEDLREMLGDMDIGLSG"
     CDS             complement(29415..32513)
                     /codon_start=1
                     /product="Phage protein"
                     /label=Phage protein
                     /db_xref="SEED:fig|6666666.357187.peg.45"
                     /translation="MTDRNLNIRVAFSAINNMARPVSAARSGTAALADQIRATQNTLNG
                     LGRQASSFDRLSAASAKTTRELEQAKAKAAAMRAEFGAASARTDEQNAALKRQRELIRQ
                     LSTAQTNETEQLKQLRAELARHGVILDCSRRATDQISDQTARYNRMLAEQKRRLAAVTQ
                     AQARYDRMQQTASNLRSTGAMAIGASAAGAYVGARMMAPNLQSDKSGAVIAAQNAEAPA
                     MGTQYSKIIKGINSAGVSNDLAQIASTVSAVRSSLGALGEVGEAELDRISRKALDMQSV
                     LGGDTAEHIQIAAIMMKNGLARSSDEAFDLMAAGMQRVSTQMRGELPEILHEYSTHFRN
                     MGYSGSEAMTLLVSMAQQGKFALDKTGDAIKEFSIRGSDMSKASVEAYDAIGLNAQRAS
                     SAIASGGAQARNAMQQTAQGLLKIKDPAARANAAIALFGTPIEDLSIDQIPNFLSALAN
                     TTDQFSNVSGTAERMGSTLRDNLSGDIDKLGGALSGLRFAIFENDSGVLRSLAQGATAL
                     VNSVREWVTANPELAQTLLVVVGGALALTAAIGTVSLATGILMGPFAKLQLGFSLLTGG
                     RGIGPATGMFSRFRNMITGSLSSTRAWGGILTSIRSGIGGIGNIAQGAGRALLMVFTQP
                     GAALSALGNGVRMLATSGFSALSGSGMAVFNILRTGFMLLLSPIGIIGAAIVAAGVLIY
                     KYWEPIKAFFSGYFSGLVAGLEPVKQSFSALSPIFDGIGRAISGVWDWFKKLFEPVNTS
                     SESLKQCTEAGKVFGEVVGMAIGGVVTVILKVAEGIGWILEKLGVIPEAANAAVSASNA
                     MNGAIPQKGHESKKPVMYVWDEKQKKMVAQEWKPQPPKEADAVIKTGEAAKPPAGESNK
                     PKTGALQDLTGSNPKTEKSGSTATTEEKKDPNKLGDIVFKNVPPAVMLANGYRESQVMP
                     AQPKVPLLERVKQTAGVLAASVLPFTVQPAGADVPAINSPAAQMKTAMSAGMASTDKYE
                     INITIQDARSLDEDKLVARLRREIDDIERRKQRRQRSQLTDHV"
     CDS             complement(32510..32626)
                     /codon_start=1
                     /product="hypothetical protein"
                     /label=hypothetical protein
                     /db_xref="SEED:fig|6666666.357187.peg.46"
                     /translation="MADIAAIFHWLPSAMDAMPVDELLAWRSRAAVRSGNSE"
     CDS             complement(32659..32970)
                     /codon_start=1
                     /product="putative phage tail protein"
                     /label=putative phage tail protein
                     /db_xref="SEED:fig|6666666.357187.peg.47"
                     /translation="MTEKQNNVVILQNPITRKGGDVKEVTITGALKQAGSLRGLKVYDV
                     MTSDVDSLLTLLPRVTSPALTKEELTTMDTWDFCQLSNAVATFLQPSSPANETGAVTA"
     CDS             complement(32986..33501)
                     /codon_start=1
                     /product="Major tail tube protein"
                     /label=Major tail tube protein
                     /db_xref="SEED:fig|6666666.357187.peg.48"
                     /translation="MSLPKKLKYFNLFIDGDNYFGQVPEVTPPKLTRKTEDYQAGGMPG
                     FVAIDFGFDAGALDMEITLGGLDAGLLKKWGVSTADGMQTRFAGSYQDEATGEAVPCEI
                     QTRGRFTELDPGSAKVGEDTAHKYTLKNTYFKLTISGEEVMEVDVLNMIYKVAGVDMLE
                     KHRANVGL"
     CDS             complement(33512..34705)
                     /codon_start=1
                     /product="Phage major tail sheath protein"
                     /label=Phage major tail sheath protein
                     /db_xref="SEED:fig|6666666.357187.peg.49"
                     /translation="MATNYHHGVTVRETTDLSTIINNIDSAVIGVVCTADDADADTFPL
                     NEPVLLTRVASVLGKAGKTGTLHTTLKCISDQASPQTVVIRVADAANAQAEGNEPKPTQ
                     DQLVIGGSDANGRYTGLYALLSAEARIGVRPRVLAVPELDTQAVAAQLAVIAEKLNAFA
                     YVSAHDCATIAAAKTYRENFSQRELMVIWPDFIAYDTAKGESVIVPAPAFAVGLRAKID
                     AETGWHKVLSNVAVNGVLGLSKDVYFTLQGTDTDADELNSNGITTLIKQNGFRFWGSRT
                     CDRETYLFESYTRTAQILADTIAEAHFFYIDKPLTPSLAKDIVDGINRKLTALVTAGRL
                     LGANCWYDKETNTGETLRTGKLTIKYNYTPVPPLEHLDLVQEFTDEYFATFANTFSG"
     CDS             34862..35995
                     /codon_start=1
                     /product="Gene D protein"
                     /label=Gene D protein
                     /db_xref="SEED:fig|6666666.357187.peg.50"
                     /translation="MSIMDTLGAISGRLDEYSPRPAFMVRVGDKQVTELNDRLMSLSLT
                     DNRGFEADSLELVLDDADGKLALPERGAKVTVALGWANEPLISKGTFTVDEIAHRGPPD
                     QLTISARSADFRETFNVKREYSWHNVTVGFVVSAIASRYGLKAGVTERLSKLELDHADQ
                     TNESDISFLTRMAEMVGAITTIKNGMLLFIVPGQAVSQSGKPLPAITITRSSGDSHSFR
                     VADRDAYTGVTAYWLDLNFGKTKTTKVKNKRKTSTPAKKKEPASSSKEGNYLKGTEGNV
                     YVMRSTFKTEQAAKRAAAAKWSKLQRGAAEFSMTLARGRADLYPELHARMSGFKTVIDN
                     ADWIITRCVHEISQSGFTTSLEFEVKITDWAADDNDD"
     CDS             35988..36107
                     /codon_start=1
                     /product="hypothetical protein"
                     /label=hypothetical protein
                     /db_xref="SEED:fig|6666666.357187.peg.51"
                     /translation="MINATPVYNDSNTNRLRGCHGDQMSKVPRNCKNTYQRRT"
     CDS             36172..36288
                     /codon_start=1
                     /product="hypothetical protein"
                     /label=hypothetical protein
                     /db_xref="SEED:fig|6666666.357187.peg.52"
                     /translation="MTHIDEALNETKPAPGACVPTNIFPRSHKGENQLDLAL"
ORIGIN
        1 ttgaacgaac tattgaacgt taatgaacag agagataacg atgagttgga ctacaatcaa
       61 gtcataacat cagaatggac gcaattaata gctacaacct cacagaaatc ttttaatcta
      121 ctacgcgcta tctccgagca gaaagcgtcc gactttgctg acaagttcta ctcctacatg
      181 ctcaaagatc aggaagcttc actttttctt tccagtcagc aagttcacga tcgcctccat
      241 gggtctatga gtaaatggat agcagatatt ctaacgaata ccggagagca cctggttgac
      301 ctaattaatc atcaaaagaa aattggccag attcatgcac gtattggcat tcccgtcgat
      361 ttggttgagc gcggagcccg gcgtctaaaa tggcaccttt atgaagacat tgcgcaggtc
      421 gccgaggata aagcgctgtg ttttgatgcc atgcgttttg cctctatctc tatggatatc
      481 gccatagaga tcatgagtaa aacctattca caatcgcacg atctcgccgc caaaaatgaa
      541 gaatcctatc ggctattttc cattctggaa aatgccagca tggaaagaga gcgtcagaac
      601 gcatcgctac tcaactggga aaatgctttt attttcagcg ttgcaacagg tacgcctctt
      661 tccagcatcc aggacctgag tgattcagag ttcggtctgt ggtttaacca taagggaaaa
      721 tccagtttca gtaacattca gggaatacgc actatcgcct cgatcataac ggaaacggat
      781 gaatatattc gcggctacag cactaccgca ctactgacgc agcaggatta cgctccgctg
      841 cttaaagcag tcagaagtaa gatttataaa ataaatatgc tcttggggtc gctatttgac
      901 gaagtccaaa agctggaaag tggtaaggat acgttgaccc ttctgctaaa ccgtcgcttc
      961 ctgccaacca ttcttcggca tgaaatatcg ctggcaatgc actcaagtac tccgctcagc
     1021 atcgccatga ttgatattga ccattttaaa accgtcaatg acacctatgg ccatgctgct
     1081 ggcgataaca tcctgaaaag gattgcagaa gtgctgtatg aaagtacgag aaacagcgat
     1141 tatgtttttc gttacggcgg agaagaattc atgatcgtgc ttattgagac gcccaaagtc
     1201 gccgcccaca ccatcatcga gcgactgaga aagaaaattc aggatcaccc tattcatctt
     1261 caaaacggcg aaagcattac aatgaccata agtgcaggta tcgccgtgta cagcggtcat
     1321 ccggattatg agtgtctgat aaaggcagcg gacgatgcac tctatcaggc caaggccaac
     1381 ggcagaaaca gaatcgaata cgcgcaagag gaataactat ttttccttgt tgcaagcctg
     1441 cgtttctgga caccgccgga aaagaatagc ccgctattca tcatcgcagg tttgcatcct
     1501 cctctaagca agccgttgaa tctctctcaa ctgaacaaat tcacagcata aaaacgataa
     1561 accaccgatt ttactaacca acccgccaaa aatttgatac atattcaata aataagcatg
     1621 atcgtcgaca atgcatcatg tagtgaatct ttgatagttt gaacttattt tatgcagggg
     1681 aggaatgagc attgcagcga cagcaggttt catcgtcacg aatttattcg attggatacg
     1741 atccaaaaac gcacagcctt gagatagaat ttcataataa agagatctat caatatgttg
     1801 gcgtgcctga atctatctat aaaaaattta tgtctgatgc tgtcgtctct aaaggtcgtt
     1861 tctttgatgg cgtgataaaa gataaatttt tatgtcgaaa aatcagatag atgaaaatgt
     1921 aaccatcaca tcctcggtat ttgtcgccgt ttcttaacgg cgatgtaaag tgtcgcgttg
     1981 cgccatatca atttgccatt tccgctctca gtcgccttcc agcatcacaa ctcatcatgt
     2041 gaattaaaca tatatccagg tggtatcttt tcgataacat cccttcaatt catgtgagta
     2101 tctatcctgt ctaactacgg agaattcata tgatcgcatc ggatatccag ggggctaatt
     2161 ctttatttgc ccagaccaac aagcacgcta ttgtgccaga tgaagatact ttcaaaattg
     2221 cacttgagaa ggcaaaggaa agcggacaga tctccagaca cgagcccagc gctaaagttg
     2281 aacctcagcg ttcaaaagca gcgcaagaat ttatggactg ggtctctatg tcccatgaag
     2341 aaagattatt tttctccgta cttgcatcca tgggaatatc caaggagcaa tatgaggcaa
     2401 tgccgttaga agaacgcatg gcgttagacc tcaaagtaca agagcgtata aaagaaatgg
     2461 cggagcaaga ccagcagctc gcgtaatggc agcaaacgag ccagttaaag cgatacgggt
     2521 gacatcttag cgtcattgac gcttatagcc cgttacatta tgtagaggaa agcagcagtc
     2581 tttttagata agagcgatta gccgaaaaac aggaaatagt aaactcctga ctatcagcca
     2641 gacgatatga tatctgccgc aaaactccga tgattgatag tcagaataaa aggtcaaagt
     2701 cgtgccggcc tagcactgac aaaaaatcat attaggaaag cgtttttcag gcacaaaaaa
     2761 accgcctttc ggcggtctac gacattgcac ataagtgctt gttttaattc tttttaaatc
     2821 aatggtgccc ggggcgggac ttgaacccgc acagcgcgaa cgccgaggga ttttaaaaag
     2881 ttacaccaca ttaaataaaa caataggtta aatgatatca acgagttgca attgcggaat
     2941 tgtacgaaat gctgcgctac gctcgttttt gctgccacca aatccactga tggcaatgac
     3001 ctgattactt atctatttct aatgaatcaa acggatttag ggtaacagcc gcatccaaat
     3061 gatccggcga aaagtgggcg taacgcatcg tcatggtgat cgtgctgtgg cctaaaatct
     3121 gttgcagtac cagaatgttt ccgccgttca tcatgaaatg tgatgcgaat gagtgacgta
     3181 aaacgtgggt aagctgcccg ctcggtaatt caatgccagc ccgtttaatg gcgtacttga
     3241 aagactcata agctggggtg aaaagcgccc cacgtttttt aggcagcaag ctgcgcatct
     3301 tctcagaaat tggcaccgtt ctgttcttgt tgcctttcgt tttggtgaac gtgacacggt
     3361 ttggcaggat ttgagattgc tttaaatcct gtgcttcact ccaccgtgct ccggtagcca
     3421 ggcacaagcg aacgataata cccaaatcct tattgtctga ttcatcacac gcagccagca
     3481 ggcgctttat ttcttctgga tagagaaatg ccagttcctg atcaccctct ttgaattgcc
     3541 gtatgccatc caacggattt tctttatccc actcccccat ccttttcagt tcggagaata
     3601 cagcacgcag gtaagagtat tcacggttga ccgtcgcttc tttcagaacg gctttaccct
     3661 ttggattcca ctcaccttta aggcgtcgtt cgcggtaaac ggcaaacata tttttatcaa
     3721 cgtcgatagc aaacggatcg cccaagcgtt cacaaatggc gagtaatttc gtgtaacggg
     3781 aatcaccgga tgacagagtt ttgccgtgca tgtcatacca acgctgaacc aaatctttca
     3841 gagtgatgtt actggttgtg gtatcaatgc cttttttatc ggccataagg cggcgctcat
     3901 aggaaagtgc ctcaccacgg gtggaaaact gcttgcggat acgtttacca tcacgaccat
     3961 aagggaagca ctggcaaagc catttgccgg atgggagttt acttacgctc attctcggtc
     4021 actctgactg tatcatttta cacaagcccg ataaaattga tgccctaatt cagttatcat
     4081 aaacacctta tgttttattg aaaaactttt tccatcaaca gcaggcttag ctattagctt
     4141 cttgatgaaa gggctgtttt caattggtaa atatatcttt tcatcaatat atttacttcc
     4201 atcatctggc acttttgaaa gtcccaatcg acaaagatta tttatataag taggtaacag
     4261 ttcagggtgt tccaaattaa catcttcatg aataagtgag taattactaa aatagggcgt
     4321 aaatcccaat acatcttttt taacaatttg gacatcaact aacggaatgg gtcttggcgg
     4381 aagaaaaatg ctaactatct ttgcttcatc agaagtcaat tgcttaataa tttctacgaa
     4441 ggctggatgt gctgtttctg ccttattttt atccatagca gaagatagta accctgcaaa
     4501 caagtcactt aaagactcat catctgccgt ataccgtaat gcttcaatcg caggaaccgc
     4561 aacattgggt ttaggtgtga tgatatcttc tggcttggta ttttttaatt tttcggccac
     4621 tttaggcata aactgatctt gaatcttttc atacccccaa accattacgc ttaacggcga
     4681 aagagcaaca tttattgatt tggcaataac cgcaagacct ttgcctagct cctgcgctgc
     4741 tggctgtatc aaatcctgat acactggcac tgactgtgta agcccagtca cagcattaat
     4801 agtttccgcg actttattat ttccagaaga cttatcattt tcagaggtat tttcatcagt
     4861 catgattagc tcgctaatat agttaaattt atattcttag agaaactgat atcaatgcgc
     4921 caacaacatc cccagcacga tccccgccgc aagcactgcg ccaaaaactc gtggttccgc
     4981 ttttagggta tttaccgcat cttgccacgt ctgcactttt gggggtaatg cattgggtgt
     5041 agttctgccc tgtcgttcat ccaaccaccc cattgcttgc tgaagctggg ggcgagttaa
     5101 atcaattaac cggcttgtac caaaattgat gtgacagaac cgcgtaagct gttcacgtaa
     5161 ttcgttctgc tgtgtgcttc ttaataattg ggacactaat tttttattag catctttttc
     5221 ccgactgcga tcatgtaacg cattcaggaa acttagcgcc gtggaatact ggctgatggt
     5281 gatttcttca atgccattca caccgagttc agcatgtaag cgacgccaaa caaaacgagc
     5341 ctcttcacgc cctgcttctg caatatcttt taccagttgg tttaattggg aacgctgtgc
     5401 actaaccaac gggcgcagat cttctttagt ctgtggggcg gcaatattga tatttttctc
     5461 gtaataatca cgtcctgcga cccgattact atccccttga gcctctacgg tcatccctta
     5521 catccttgct tactgatccg aattatcttg cgattgaatc ttatctataa gcgccattaa
     5581 ctcttgcgtc gttggagctt caacgggcat ttcgtgccca tctttgatta aaatgcattt
     5641 agctctacga tctttattga tgtaagcgat aataatattt gccagcatct tcatggccgc
     5701 tacaccgcca ccagtaggga tagccacctc aagaaactct atcgctccac cggagaacat
     5761 tatcgggctg cgttctgtta tctgaaagtt agcctctttg agttcctttt ctaaattcca
     5821 tatactgcca ccactagctg aaaagcggag tgtaactatg tttatgttgc tcattgttcc
     5881 tgaatccttt tccggtaaat gtcgaacatt tttttatgta attaaagcgg cctttcgcgt
     5941 gtttaatcct aactttcgta tcctgttttc accggtggat aaccacaccg atcttgaaga
     6001 agtaacgagc gtttgtgact gcgtgccaat ttatctgcga gttcgacttg aagacccaga
     6061 acgcctcgcc cgtgccataa atgaactacg ccgagaaaaa gccgaatcat cccgcgatta
     6121 aagcgcatca ctgctactca tccctaagcc tcgttcatcg gggctttatt ttttaccttc
     6181 gtgatagtct ctgcccgcta cgcgctggcc gctacccgtt acgtttatcg atgctgtcgc
     6241 agaactgccc gccgtcaacg cggctaaagc ggcagctttt atcgccagtg gcgcagcacg
     6301 atagattttg acgagctcca attcatcatt agaaatgtca ccaaggtcgg gggttctttt
     6361 tccggtgagg atatacaaag tatccatgcc gtaattttca ctaagaaaag ctagcgttgc
     6421 accatcgggg gcagtttcgc cacgctcgta ttttccccaa gtccttgttg tcgtgcctaa
     6481 ctcttctgca attgcactct gacttttacc aatcgtttcc cgctcttcgc gcaaacgccc
     6541 accaataagg aataaaaatt cctctttcga agttgacata ggaagttttc ttcactagat
     6601 tgtgttgaac aggaactcag tggatcacaa cataccatta tgacacaaga aaatcatgat
     6661 ctgagcgcac agtccaacac cggggatcgt gctgtaggcg cagagataga ggctcaaaaa
     6721 cgccctaaaa tcttcagcgc agggttaagt gatgatgagt tgattgaatt cttacgtgat
     6781 cttattaata cactagaagc ccgcaaatac ttcaatgatc gaccaaaaga attgcgggcc
     6841 agtgctgatg cggctgaaaa agaattaacg cggttgaata cacttattaa cgtaagcgtc
     6901 gatcagcata gttagcatcc cactcgtcat aggagtagcc tttatatctt tcataataaa
     6961 tacttatatc atgattacta aaagagtatg agcgattgat ataagaaatg atttcatctg
     7021 aaattttata gtcagaaatg tcatcccata gaatgacgat tgcatcatga aattcaatat
     7081 ttttagcttc ggtcaaagat atgttctttt tattcactag atagtgaata agtgcatttt
     7141 ttccgaaaag agcaaggcga tgcttatcaa ggctctctcg atattcaaaa agcataacgt
     7201 cgagcttaaa gataataaac gatctgttcg atatgtaatg ttcaagttcg tatccaaaac
     7261 gctcgttatc gttgacattc aaatgtgaaa ctacattttt tattgtgttt tcaaaaacac
     7321 gaaaagcatt tgtaagattt aaatccatac aggactccat ttccatgagt ggttggttga
     7381 ttgttcgcac ttgaagccta ccacaaacca tgcgccggac gtggttaaaa attccggcac
     7441 ataaacctta atagtgggag aagcagaatg acagttatta gcgaacagag atcgcgttta
     7501 ccacgtggta tcgcatccaa gaaccctacc ccaatgcgct tatcggacga tgagcgagat
     7561 aagttagcgg cactggcagc acaagaaagc cgctcacttt caagcatggc ccgtctggtg
     7621 tttctgcggg gactggaatc ttttaactca caaggatagt aggtggtgaa atggctaagg
     7681 cattaaacat taatatcacc gtccctactc catatgtttc attgaaaaca tattcagaaa
     7741 tgacgggtat tccattgcgt acctgcgaag gaatggtttc tgacggaagg attatcattc
     7801 gtcccaaaaa ggcgcgaatg gaaaaagtcg aggttaattt aatcgccatg cttcgtgatg
     7861 cgataaccaa tagcgaaatt taatcatgga aaaaaatcgg ctggtatttt ttggtattga
     7921 tcacgcatta attaaagtca gtgagcatac cagtgtttat cgcggctttt ctatcattcg
     7981 ctgccccaga acggcaacca acccgattac acgttatcgc gtgagtcaag gcgatcaatc
     8041 attcgggtta tttgatgcat tagggcaagc gacttcttat attaacgaac tgcacggcat
     8101 gagggattca gcatgattag cacagcgcgt ttattaaaag aacaatcacc atcaccgcgg
     8161 caggaaaata aaggctggct ggaattacca agcggccagc gtttccagcc aacccccgca
     8221 caggcttatt ttgctccgtg gagcaaaaag ccctatatgc cagcgcctaa aaagcgccgc
     8281 tggttcgccc gcctgatggg tattgcggcg taactgtcat ggctaatacc gaagccgccc
     8341 gtgccgttcc gctgagtatc gcggtcagaa ctgacgggct gaatcacata gcgatgctga
     8401 gaggaaaata cttcaacaca aacagtgaaa aagaaatgtg ccgatttatt gatgatctgc
     8461 gcgatgaaag attttatgac ggaaaccgta aggataggaa atcaacgcat tcggataata
     8521 tgcgcgtgct gtcagcgata tttgaattag cggatattga taaggagcgg cataacctga
     8581 aatttaatga actgacaact gaagaaaaag caaagctgat taaagcgatg aataaactta
     8641 aagcagttgt gagtttattc cccaaacatt taattcttta accgtaataa ctccgttttt
     8701 aaaggcgtaa acccgccggg ctttctatta cctgaaaaaa ggaaatcacg atgagaaatg
     8761 cagaagttaa acaaatgcaa gtggctggta gtgatgtaga tgtacttgtt tcactgttgg
     8821 gaaaagcacg cttggaagaa aaaaaatccc agcactggga gttttctcag cgtctggcag
     8881 cgctggccct ctacgcacaa caaaaagggt attccgccgt agaggttatc gagctgctgc
     8941 gcaaagaggc ggaacggttt gagcattcgt cacaggagat catcgtatga acaacgtcat
     9001 gattgatatt gaagcgctgg ggaaaaaagc caacgcgccg gtaggttcaa tcggcgcggt
     9061 attctttcat cccgtaacag gtgagctggg tgagcgcttt tattgccgcg tcgattttga
     9121 aaacgacatg ctgaacggag cggtgccgga cggcgacaca atcaagtggt ggttgcgtca
     9181 gtcatcagac gcccgtgctg aattaattag cgatgatgct accccgattt ggggcgcact
     9241 cagcgaattt agcgactggc tgacagatta cgctgaaagc ctagaaacat tgcatgtgtg
     9301 ggcgaatagc ccgtcgtttg attgcacgat cctgaaaaca gcgtttgagc gaacggatat
     9361 tgatgttccg tggaattact ggaatgagcg tgacgtcaga acgatgaaag aagctgggtt
     9421 cgccatcatg gatatggggc gctttctcag cacagcagaa accatcggcg ttaaacataa
     9481 cgcgctggat gatgcgatca gccaggtcgc gttggtttct gctgttatgt ctcggttggt
     9541 tcagaatagc ggcggtgaat tatgatccgc ccgttcatca aatgggcggg gggtaaaacc
     9601 cgcgtcctgc ctgatttgct cccgcttctg ccaaaaggtg atcggctgtt tgaacccttt
     9661 gtcggcggcg cgtctgtatt cctgaatacc gactttcctc gttatgtgct ggctgatatt
     9721 aacgccgatc tgattaatac atatcagatc gctcaggaag ctactcagat atttatccgc
     9781 actgcgagag agttatttga aaacggtaat agctcggctg agtattatcg taaccgcaaa
     9841 acattcaacg ctatacatga cgatgagcga ctgttaaagg ctgctttatt cctgtatctg
     9901 aaccgccatt gctataacgg tatttgccga tacaacaacg ccggtttttt taatgtcccg
     9961 tttggggact ataaaaaacc gtacttccca gaggcagaga taaagctgtt tgcagagaaa
    10021 gcaaatgaca caacaacctg ctttattgcg gcagatttcc gaaaagtgct ggccgcgaaa
    10081 gcgataaacg aaaacagcgt tatctattgc gatccgccgt atctgcccgc tagtgataca
    10141 gccaatttta cgcaatacca ccatgctgca tttacccgcg aacatcacca cgatttggca
    10201 ggggggctcc tgaacctaaa ccgctcacgc ggcgtgcctg tcgttatctc aaatagcgac
    10261 actcccgcta cgcgcgagat ttaccaacac tatcagttcc atgaaatcgc ggttcagcga
    10321 tctatcagcg caaacggcat tacgcgtggt gccacaaaag aagtgatcgg cgtgctgaat
    10381 gcacggaagt tacgccatgc gtaaagcccc tacggaagtg ccaaaagggt taatccgacc
    10441 gagcttccca ccttcgccgc caatgacaat tattgcattg gaaaatgcac gcagagcgca
    10501 ggtattagct atcgagatat cagttagtga gcagcgcaga gaggatttaa cgcaattagt
    10561 gctgagtgaa atcagtgatt tttttgcagg tatcgggcaa cccggtgaac cagaaacgcc
    10621 ggaagaaatg caaacggttc tgatggcgcg tgttcagtcc gtatttagcg gtagtggtac
    10681 gctgaaataa tggctgaaca atgggcttat ccgtggaatg cgccacgtcc agcgatctcc
    10741 ataccacagg ggatcgctga ctccttttct ccctttgcta caaataccac cgagccacac
    10801 ccagcagtcg agcaacacct taagcggctg gtatcgcgcg ctgctttctc cgatctggat
    10861 tttgatcagg ccgtcgcgag gctggactat ttcgagccta acgcaacgtt actgacgatg
    10921 cgccgtcagt tcgctgaggc tgagcgggac gagcatcaag caacattgca gaactggatg
    10981 gaaacaccgg aaggtgtcga atgccgcttg cttgaacagc cgttttttat ccgcgatacc
    11041 tacaggaaaa aaatcgaatg gctgcgcgag aaccgcgagt cgcgacacgt cagcgccttt
    11101 ttcatgggaa ccgtgaaaaa agccctgctg cgtctggatg ccgtgcgcgc caagcaaggt
    11161 gtgcgtaatg gttttacgtc agagcttgcc agctactggc gcgcacggtg gatgcatctt
    11221 gccgagttta cgaaacatga ggcgattaac gccggtcatg ctatcgcagc cagcatcgcg
    11281 gaaatgtttg aaaccgaatg cggcaacact ttgcccgcag atatgacgaa tgacgatatt
    11341 caggcgcttt tctggcatct ggggcgtgaa atgctggcgc tacgggttac gccgccgtgt
    11401 tggggcgtaa tcatcggcga taacgagtca cgaaaccgca tttattccgc cattctgcgt
    11461 atcaccaatg ctgattggtg ggggcgtaag ttatggcgtt tacgctgcga gtggcgagaa
    11521 aaccagttcc gcgccatcgg tgtgatccac aagaaacgta tgcagtatgt cagtatcgat
    11581 gcgctgaacc agtggcagga gcaacgccgc aaaaaccgag aattctttaa agcgcatgag
    11641 ttagtcgatg aggacggtaa cgtagcgtcg ctggaaaaca tggtgtacgc cagcgttagt
    11701 aatccggtta ttcgccgtca cgaactgatg acgcgtatgg ctggcgttga aatggttgcc
    11761 atatcacgta gcgatgaggg tgtttttctt accatcactt gtccgtctcg ttatcacgcc
    11821 accattcaga gcggtcatca aaatcccaag tgggatacat catcacctcg gcaggggcag
    11881 cgctatttgt gtaagacgtg ggctaaagcc atgtcgaaac tgaaccgacg cggcctgcgt
    11941 ccgtatggtt ttcgcgttgc agaaccgcat cacgacgcta cgccgcactg gcatgtattg
    12001 ctattcatgc cgccagaaga ccggaaagaa atcactgaaa ttctgcgtga atacttcatc
    12061 gctgtagacc gcgctgagct ggggcgtaat accggcgcgc gctttaaagc gaagcgtctt
    12121 gatcctaaga agggtagcgc cactgcctac gttgcgaaat atatcagtaa aaacatcgac
    12181 ggctacgcac ttgacggtga gcgtgataac gaaaccggaa agcctctgcg tgaaaccgca
    12241 aagtttgcga tggcctgggc gtctcaacat aacatccggc agtttcagcc gttcggcctg
    12301 ccgccagtca cagtctggcg cgagctgcgc aaactagcga accagcttat cgcggtacag
    12361 aaagaagccg gaacattcaa acgtggcacg gcacagcttg ctgatcctgc aatggatgcc
    12421 gtgctggcct ctgcggacgc aggctgtttc gctacttaca tcgaaaagca aggcggcgtg
    12481 ctgatcccac gcgagttata cacagtgcgc atcgcgtatg aggaagccga cgagcaaaac
    12541 gactacggcg agacaccaga aaaaatcttt ggtgttttct ccccgcgttt gggtgagcta
    12601 tcgcgcatct gtacccgtct cgttaagtgg aaaatccgca aaaaacaggc agcagacgca
    12661 ggcgctagtg atagcgctgg acgtgatttg gctgttacgt cgcccgccgg cgacgcttgg
    12721 agttctgtca ataactctac gggcgacgaa aaagtaagca tttccgaacc ggccgataga
    12781 gagattggca gtacgtcaga gccagaaatt accgactttg agcacatgac cgacgcggaa
    12841 ctgcgtggat tgctcaatcg acttcgatca cagccgccgg atcggcgaca tagcgaacac
    12901 tcgtccacaa ctcagcccca tgaaacgact gaaaaacaga ctgttagtaa gcggtcggac
    12961 gactggcgcg ccagaattgc agatttcgcc cgttcgttgg gctgggatat cagcgccggt
    13021 gaggtgcggc ggctggaaac aggaaatgcg atcgcgctcg ctggctatgc ctacgttgct
    13081 aacggtgacg gttgtctgta tcgcgcgccg acgaaaaagc aaaaggacgc ggaatatcag
    13141 gatagagcgg cggcactgct gcaacgcatt gcagtgttac gtgggggtgg attccaataa
    13201 ttgatattgg cttaaccata aaaataaagt tgacaaaatc gcaattaaga tttaaacata
    13261 ataaataagt tttaaacata gtcactaagt ttaaaacaaa tacagcaacc aaataacatt
    13321 aagtgagagc gacatggcaa ttagcccaat acaaaagcaa ctagctgaat tagaaaaaaa
    13381 agtggagata ttagatagca taattgatgt cgccaagact tcaggtggcc gcattaccga
    13441 tgatggtaaa aatttaattt acatactaag aaatgcagga atgaataaaa cggatatcgc
    13501 aaaactacta gatgtatccc cagcagcatt aacaaaatac gactagcgca ttaattttgt
    13561 caaaagctaa gtaaatatct actgcacaac cccgcacacc aatgcacaat ttttttgatg
    13621 ctattatccc cttcccgcgc cagttctggt gcgggtttgt ccctgctgca caactgcata
    13681 aaaacgcgct attttcgtgt gcgggcgtgg cgggggaacc ctcgcgcgct gagggggata
    13741 agaggggtat gttggttcat atgctactgc atcctcatca cgtcgctatt gcgctgtatc
    13801 gatctcggtc aatcgcggcg ttgttcggtt attgatgtgc ttaaaatggc attcatgcgc
    13861 ttttatgcag atgtaaaaaa accgggcaac cttgcggctg tccggtctgc tgtttaatag
    13921 ctaggtgaat ggttttgaat gactttcgcg gttacattgc accttcggcc agggcataag
    13981 gcttgaaccg aagtacctcg atccccagcc agtcgttaag ctctttcagg ctttccatta
    14041 tcggcatgag ttcgttgatg gcgaatacct tcgcggcctt ctctacgtca ccaaatcccc
    14101 ctgcattgtt cggcataatc cccattaagt tgggcggtac acggtgcgcg gctaacatgt
    14161 cgtcgcgggt agcgtccttg atgccggtaa actcatcttt ggccgcaatc tgactaaacg
    14221 gcaggatttg caagccgtct ttcttcccgc ctgccgcgta aacaaacagg ttcttaaatg
    14281 ccccattgcc acgcgcatct ttcagcgact tcttcaattg ctcgacgtca gcattgttgg
    14341 tgatgggatc ggtgaggtag acaatcaccc ccgcatggct accgttgatg tagtaattac
    14401 gccggaacaa cgtggcttcc ccattcagca tcgctgattg gattaccgcc atatattccg
    14461 gtgtgccgta gatttcctgg tgaatgctgg ggcttttaac gtggaacacg ctgcctggct
    14521 cgaattcgtg atcgttggcg tagtacgtca caaaccagta ctgatccaga ttctccccgc
    14581 gtcgggtgta cttggcgtgg gtgtgcttta gcttcagtgg ttggccgaaa cggttctttc
    14641 tcagttccag ataagcgtta ccgaatacca gccagtcgag tacaaaggcg ctggcatcct
    14701 gccgtgataa cagcgggtgt ggctcgtagc aggacatgat gacattgcgt ttgaacagta
    14761 tcggtgactg atgatgcacg gcaacgtcaa acattcgcgc cagaccgtag gtgctgatcg
    14821 gtggttcata ccagcggcca tttctggcgc actccatgca gtccaacagg tcgcgcctgt
    14881 ccatgatggg ctgtgcgtca ccaaatgaga aagactgtag tgactcaatc ggctgttgga
    14941 ttaattcccc tgttacgggc gtctgtgcgg ctggggcgcg tagattggcc gtgcgcgggt
    15001 gctgtttctt acgtgacatg gttagaactc ctgaataaat ccatcattac cgcccgactc
    15061 gctgccgatt ggttcattgt gtaacgcgtg catggttgcc caggcaatgt caccgtggct
    15121 gctgcctttt gttctgtctg atgcatacga cgtcatgccg ccctgcgtca caaatttccg
    15181 taccgtcatg aaagaacggg ccagctccat catccccgcg tcatactcaa accgccccgc
    15241 gcggatcagc atttgggctt tcagtaccag ttcacgtttt acgctgggcg agtattgata
    15301 tttcacggcg gcggggaaaa acttaacgac aagctgatgc acggcgctgc cgttaccggt
    15361 gctatcaatg ccgataaact gcacgttgta ttggtgggtc agttctttaa tgacctcagc
    15421 ttgtttttca aaggtcatgc cgcgtaactg ccgtacctca atcacacgga acttgccgcc
    15481 aggaacggcg ggcggggata cgatggatag accggcactg tcccccgtgc cactgtcacc
    15541 acttggatcg tagcctatcc atacggggcg attacctaac ggtcgctgtg tgtagggtcg
    15601 ccagtccggc cagacatcat cgttatagcc atcaacaccg cagttaatca gcgcggtata
    15661 gtcaaaggct cgctcaccga cgctgacaaa gcggcaggcg taaaggtttt caaaatcgtc
    15721 agggctgttt tcagatttaa tttcattcag atcaaccagg tcaaaacctt gctctaacgt
    15781 gtcatgaatg gtgacgatct gccgccagat attgtccccg cacagcagcc ctttcttcag
    15841 taccttatgg gtaacgtcga tttctacccg ttccgcttta gggcggcttt tgttaaagaa
    15901 atcccctgtc cagaacgtgt aggcttcatg ttcttcactg gatggcgtag aaaagtacgt
    15961 gcggcgcaac cctttttgcg tcgccatccc cgccgcgact ttacgcaggt taagaaagtt
    16021 gctaacccaa aagaattcat caaagtacag attgccggtg tagctctgtg cggttgccgc
    16081 tgacgtaccg aggaagtaca gtgttgcgcc gttcgacagc acaatcgcgt ccccgccttt
    16141 cagctccacg ccaatgctgg acgccagcag ttgaataaac cgcttgaact ggtacgcctg
    16201 cgcccgactg gctgacagaa agatttggtt agtgccggtt tccagtgcat ctaacagcgc
    16261 ttcacgcgca aaataccagc tggcacctat ctggcggctt ttcagtatcg cgcggttacg
    16321 ctgcttgcgt tttttgtacc agcgcttttg gtgctcgtag agtgattcaa gtaccagggc
    16381 gcgcaactct gcgatctgtt cgtccgtaaa atggttcttc ggcgctttct tccgcgtctc
    16441 cttttcctga tcctttcttt catcgcgtga aaaacgtgcc atctgacggc ctaacaggtc
    16501 gatggtttta aagtcatgcg gcgtgaggtc gtctttctct atcagtcgta agtaacgcac
    16561 ttccgtgcgc tcctgcgccc gctggattgc cgtgctgtcg tcccacttat ccctgcgccg
    16621 ccatgaatac agcgtgttgt tgctcacccc cagccgctgc gcgatttgag ggatgctata
    16681 ggcctgccag taaaggcttt tggcttctgt gcggatatcg ggaagtagat tcatacatac
    16741 aggctatcgc gcccgcgcgc ggcaaaatat cggctcccgt tgtcgtggtt ccgcaacaac
    16801 ccgcaccgat agcgcctgcg gtgaagcgtg gcgatgatag gggtatcaga cagacaccct
    16861 gttatcaccg gagcattacc atgccgattt caaaaccgtt tcttgccgct gttgaaggcg
    16921 cgacctgcga cgggcgcact cttgaacgtg cgcacatttc gcaaatggcg aaaaacttca
    16981 acaaacaggt gcgcggtgca cgcgtgaacc ttgaacacat tcgcggttac tcgccaacca
    17041 gcgattttcg tgcgtatggc gacgtggaag aagtgagcga gtttgagatt caggacgggc
    17101 cgctcaaagg caagttggcg ctacaaatca agattgatgc cactgatgac atggtggcat
    17161 tgaacaccaa acgccagaag atttacccca gcattgaaat tcacccttct tttgctgaca
    17221 ccggcgaagc ctatttgatg gggctgggaa tgacggacga tccggccagt ctgggcgtcg
    17281 gcattctgga gtttaacgcc aagtgcgctg gcaaaggccc gctggacggg cgaaaaacca
    17341 gccctgaatg tttcttcacg gccgctgata cgccgatcac gcttgaattt gaagaagagg
    17401 cacccgctgg cgaagcgggc aaaaacttct tttcccgcat caccgaattg ctaaccggca
    17461 gtcagcaacg gttcagtaag gaaaatggcg agctgaaaca ggcggttgag ctgatcgcca
    17521 aaagccaacg tgagctgctg gataaaaccg aaacattcag cgcgttacaa gcgcaaaaca
    17581 ccgagctgaa aggcaacgtg gagacgctga ataagtcatt aaccgagctg aaagaacagc
    17641 ttgccggaca ggatggcaac tttagccaac gccccccagc ttccggcggc aatccgcaat
    17701 ccggcatcgt gttagctgac tgctaatcac cctttaaacc gactatcgca ggaacctaac
    17761 atgaagaatg aaacccgcgt tttgtacgac gcttacatta accgccaggc tgagcttaac
    17821 ggcgtccaac ctgatcacgt taccaagcag ttcagtgttg caccgtcaat ccagcaaaag
    17881 ctggaagata aggttcagca atccagcgag ctgttgcaaa aaatcaacat caccggtgta
    17941 tccgatcaag aggggcaaaa gctggggtta ggtatcagcg gccctatttc aagttcgaac
    18001 acatcaagca ccgatcgacg tgagccgaaa tcggttcaca cgatggatga tgataaattc
    18061 cgctgtgagc aaaccaatac ggatacgttt atcagctatc cgcagttgga tatgtgggcc
    18121 aaattccccg actttcagca gcgcattagc aatcagatca tcaaacgtaa agcgcttgat
    18181 cgcatcatga ttggttttaa cggtacgtcg cgtgccgcta aatctgatct ggcagccaac
    18241 ccgctgttgc aggatgtgaa tatcggctgg ctggagaaat atcgcctcca tgctgcacag
    18301 cgcgtgatga aaaacatcac cgtcaccagc cgtgatgatg aaaataaagt catcgcgaag
    18361 ggggattacg gcaacctcga cgccgtgatc tatgacgccg ttaactcact gctggatgag
    18421 tggtttaagt catcacaaga tttggtggtc atttgtggcc gtcagatcat ggtcagcaaa
    18481 gaatacccgc tgattaacgc catcaacacc aacaatccta actctgaatc gttggccggt
    18541 cagttgctgg tatcgcgtaa ggctatcggc aatctgccaa ccttcattgc gccgtctttc
    18601 cctgatggca gcatgttcgt gaccccgttt agcaatctgt cgatctactg gcaggaagat
    18661 aagcagcgcc gcgccgtgcg tgatgaacct gagcgcaatc gtattgcgac ctacgagtca
    18721 tccaatgacg cctatgtcat tgaagactat ggcaccggat gcctgattga aggcattacg
    18781 tttgccgcgg cagcaccggc gcaaggctaa tttcaacggc aagcaggcca gataacactc
    18841 ggcctgcatc aagggggcat catgctgaca cctgcgcagc gacattttca aactgtcatg
    18901 gcccagcgcc acggcaaatc aaacggcggt gacgttgagc acaccgccta tgaacagcaa
    18961 ctgcatcggc tgaggatgga taaatcccgt ttaagccagg ttcaatctga tgcgacaaag
    19021 gccgagctga aacgggcgct gttgcctgat tatcagggct ggattaatgg cgtcttggca
    19081 gcagatagcg gccaggctga tgccgtgctg accacgatca tgatctggtc gattgatgct
    19141 ggattgatta gcgatgcact gcgtattgct ggttatgttc tgcgccatcg cctgccaatg
    19201 ccggatcact ataaacgcac ggttgctacc gcattggttg atgagatttg cgatcccgca
    19261 ctggcagcat ttaaggctga tgccagtctt gcgccactat ccgcagagct gctgttgcag
    19321 ttggaacagc tgacaaatgg cgaagacatg ccggatcagg tgcgcgccaa actttacaag
    19381 acgttgggct acaccctgcg cctggatgct aacgaactga gcgccgcgcg tgactggttg
    19441 caacgggctg tcactttgtt tgatgggatc ggtgttaaac gcgatatcga gctactgggg
    19501 cgggcgctca agaaagcaac tgagccagag gcaggggcag aaaacacgga cgtcccacct
    19561 aagccacctg cggataaacc agccgacaaa cccgcagcca aagcaacgag agcgccgcgt
    19621 aaatctacgg cggcgaaagc atcacgaact acgacaccac gcgcccgaaa aagcgcgtcg
    19681 taaccaaacg tgcccccgcg caccaggcgg cacggcgtaa taaggcaatt ttattgtgtc
    19741 gtgttacgtc gtccaccgcc tgtcttttga ggtaatgcca tgagcctgat tgcaacagag
    19801 ccggtaaggc cagccacgca ggacaccatc aacgatgggg atgcgacagt gacgagccat
    19861 gcattctggc cggtgattgt cctgtccgct ctgcgtcgtg cgatgcgtct tgacgggcaa
    19921 gtgacaacgg atcgcctgat ggataaggcc atagaagcgg ttgcgcacgt taacggccag
    19981 ttggccgact ggcgaaacag ccaagagcaa cgtgggcttg ccgttctgtc agaggttaaa
    20041 cccgatggcg ctgacgaaat cgaccagatc aatggcgagt ccgttttggt ctggcgctac
    20101 cgccgtgcgg tgtattccat caccaaagcg ctgttgattg agggttaccg tgatattgac
    20161 accacgcgcg aaggggaaaa gcacgcagag gcgttgagtt cacagattga cacgctgtgg
    20221 cgcgacggcc gctgggcaat acgcgacatc ctcggcgtta atcgtggtct ggctgagttg
    20281 gtctgatgga ggttcgtgcg cagcaaaatg acaccgtcga tctactgtgc tggcgctact
    20341 acggcagaac agacggtgtt acggaagggg tttacgcggc caatccgggc ttgtgcgaac
    20401 gtgggccact gttaccggct ggcctgctgg tcacgctgcc agacgtcacc gcagcaacac
    20461 aacaggaaat catacagcta tgggactgac gacagatcgc gtggcatcgg caatcaccta
    20521 tctgcttgcc acgctgatcg ctaccgcagg acgaatgacg ctgagcgact gggcaacact
    20581 aatagggatt gctatcgggt tgctcacgtt ttgggtgaac cgcaaccaca aaaagaacat
    20641 agagcgtgac caggcacagc gcacagactt aatgcgagag ctggtcagga aagttgatca
    20701 tgaaaacctg ccagaaacgt tggacgcctt gcgcgtaatg aacgggcagg aaacaggacg
    20761 ccgaggccgt gatgctacct gaagcactga aacagcgaat tattcccgtc gttactgcgt
    20821 gcgcattggc gatagctacc gtctttgttg gcttttttga aggcaaagag aacaccgctt
    20881 accgtgatat cgcgggagtc tggacgattt gctacgggca taccggtgat gtaaaggccg
    20941 gtgactacaa aacagatgct gagtgcgacg cattgttaca gcaggattta aagcctgctt
    21001 ttcatgccat cgatcggtta gttacggttc cactcagtga gttacagcgc gctgcactgg
    21061 caagttttat ctacaacgtc gggacgggtg catttgagcg ttcgaccctg cttaaaaaac
    21121 tgaaccgtgg tgatctcatc ggcgcatgta acgaattacg ccgctggaat aaggccgctg
    21181 gtcaggtctg gcaagggtta accaaccgcc gcgaggccga gagaatgcta tgtctggaaa
    21241 agttatagcg acattagccg ccacgctgtt gtttctcgcc gctatcgtac tggctgaaca
    21301 ctaccgacaa aaatcacagc ggctttcggg tgaaatcaca acgttaatcg cagaacggga
    21361 cagcgccgag cgcgttatca acaatcagca acgtaccttc cagatattca acacgctgtc
    21421 acgcgaggct gaacatgata aacgccagat acagcaagat gccgatacac gtagtcagac
    21481 gattaatcag gcgctggccg gtcaggtctg cgctaatgag tttgtgcctg atggcgctgc
    21541 tgtgcagttg ctcgactacg cgaaccgttt acgtgccgat agcctgcgtt cccctgccag
    21601 cgaacctaac cgcaccgacg gtaataccgc tgccgcaggg cgcgatagtc aataaccgtc
    21661 tgacctacgg ccagtccgtt ggctggaatg gtctgctgct ggctgcactg gagagcgcca
    21721 ataaagataa agcgctcatt cgacaggctg aacaacaaag agagcaacaa catgctaaaa
    21781 gcggaactgc tgagaaaagc cattagcgaa caggtgccgt ggttgcggga aaaccccgat
    21841 caactggtcg tctatgtaca gaaagggaat gcaataagta ccggtgcgcg ctccgcctcc
    21901 tttgaatatc gctacacgtt ggaagtgctg gcaatggact atccgcattc tatcgatacg
    21961 ctaatggtgc cagtgctgat gtgggcgaga atctatcagc ctgatttatt gctcaaccca
    22021 gaacggcgta aaacgggaat tacgtttgaa gcggatttac tgagtaacag cacggccgat
    22081 ttattgatcc gcattcaggc cgatgaggcg gtgatcgtca ctcgcaatga gtctggagaa
    22141 atcaacgttc gtcatcgcgc tgacccacct cctgatccga tggaaggaca agatgcatgg
    22201 ggattgctgg taaaagacga tgtggccaac acagttattc atgacgctac ggcaggttag
    22261 tgatgagtga aaacctattc attgagcttg aaaaagagtt gcaatcccta atagggacaa
    22321 cgaagccaag ctacagaaaa aaactagcac gtaagttagg gatggctatt cgtctcgatc
    22381 agcaaaagcg aattcgtcag caaaaaaacg tggatgggtc ttcttatgcg cctcgtaaaa
    22441 aaaagctaag acgcactcaa ttgggcatcc gtttcttatg gaatggcgaa gcgcgtaccc
    22501 tcagtaattg gcgttcatcg aaaacgtcat caggtcgaat gattactggc tttgatgtgg
    22561 ataaaggtgc ggttcgttca tttaatcgtg atgatataga acgttattta gaaattaatc
    22621 gaagtgaaaa aagacagacg gtgaagcgag attaccccat gtttcgcaaa ttgcgcaccg
    22681 cacaattttt atatgcaaaa gcctatccaa atgcggcaat tgtagaattt aaagggaaag
    22741 ctgctgatat cgctcgccaa catcaatatg gtttgatggg tacagtgagc gcattaacaa
    22801 aagtacgcta ccctcagcgt gaactactgg gggtgtcacc atcagagaaa gtgaaattac
    22861 tgaacctcgt ttatcacgat ttaatggatg aattgagaaa ataacgttta tattgtctcc
    22921 gcctccctac aatccccttc cgttgtgcgc ccgcgcgcga cacatgaaac tggcgctatg
    22981 aattaattac cgagcgccag ccatgaactc aaatgagttt gaccgtctcc tgaataacct
    23041 gatccgtatc ggtacggttg ttgacgtcga tcactcccgt tttttggcgc gagtggtaac
    23101 cggcggcaat accacgggat ggatacgttg gtgtgtgcag cgtgcgggtg atgccaaaac
    23161 gtggtggccg ctgtcagtag gtgagcaggt tcttatggct tcaccaggcg gcgatctgga
    23221 aacggctgtg atcgtattaa gcctttattc caaccagcac agtgcgccca gcagcacacc
    23281 aaaggtatac accactgatt atcccgatgg tgcaagcgaa acgtatgatg ccaacacctc
    23341 aacgatgacc gttaaaggcg tcaaaaatgt gatcgtggaa gcggctgaat ctatcacgct
    23401 ggacaccccg aaagtaattt gcacccagca tctcagcact caaacgctca gcgtagaaaa
    23461 aggcggcacg atgcagggcg atatcaccca cactggcggc caaatgtcat caaacggcgt
    23521 ggtcgtagac agtcacactc acggcggcgt acagcgcggt ggtagccaaa cggacggccc
    23581 gcaatgagca atgaaaaata tatcggcatg aatgccagta ctggtcgcgc gattactgat
    23641 gatgagcata tcagccagtc agtacgcgat attttaatca cccctgtcgg tagccgagtg
    23701 atgcggcgta gctacggatc acagcttttt tctctgattg acgaacctca agagcctgca
    23761 ataaagctaa agataacgtc agccatctac agcgcattaa tgcgttggga gccgcgtatt
    23821 accccaacaa aaattacgct ggaaacccat ggtgccggac tcgttgccgt tacgcttcag
    23881 gcgcagcgca cagataatct ggcggcattt agcgccacga tttcactaca gggggcacga
    23941 tgagcggatt gattgattta tccttgctgc ctgcccctga tgtcgttgaa acactggact
    24001 acgaaacgtt gtatgcggaa cgcaaggcga tgtttatcgc tctgtttcca gtcgagcaac
    24061 gtgatgccat cacacgcacg ctggcgctgg aatctgagcc gctaaccaag ctgctgcaac
    24121 tgtctgtcta tcatgaactg ttattgcgtc agcgagttaa cgaagcggcc agcgctaaca
    24181 tgctggctta cgccgccgga agcgatctgg atcagctagc ggctaacgtc aatgtgcaac
    24241 gtttggttat cacagcagaa gatacaacgg cgatcccccc cattgaagca gtcatggagt
    24301 ctgatgccga tctgcgtacc cgtacgcaac aggcatttga ggggctgagt gttgcggggc
    24361 caaccgcagc ctatgaattt catgcccgta gtgccgatgg gcgagtcgct gacgccagcg
    24421 cagtcagccc cagccctgcc gccgtcacgg tcaccgtgct gtcgcgtgaa ggaaatggca
    24481 gcaccagtga tgaattattg caagccgttg atgctgcact gaacgccgag aacgtgcggc
    24541 cggttgcaga ccgtgtaacc gttcaatccg ccgtcatcat cccttatgaa attgccgcaa
    24601 cgttgtatgt ctatcctggg ccagaagccg aacctatccg catcgccgca gaagcccgct
    24661 tgcagacgta tatcaccgca cagcatcggt taggccgtga tatccgccgc tctgcaatct
    24721 tcgctgcact ccatgttgaa ggtgtacaac gtgttgatct ggaaagtcct gccgccgata
    24781 tcgtgctgga taaaagccag gcatcttact gcgctaactg ggtgctgaat atcgggggat
    24841 cagatgaata acagcctgtt acccgtcggt tcgtctgagt tggaaattgc cgccgcaaaa
    24901 gcctgcgcag cattatcccg cacgccaatc ccgctgcgcc agttgtgcaa tcctgatgcc
    24961 tgcccgttaa agctgctgcc ctacctcgca tgggcattct cagttgatcg ctgggatgaa
    25021 aaatggccgg aagtcattaa gcgtcaagct ataaaggatg cctactttat tcatcgccac
    25081 aaaggcacca tcggcgcact gcgtcgcgtg gttgagccgt ttggttatct gattcgcatc
    25141 atcgaatggt ggcagaacgg cgaagcgccc ggcacctttc ggttagatat tggcgtgcag
    25201 gatagcggca tcaccgaaga ggtctttaac gagcttgagc ggttgattgc cgacgccaaa
    25261 cccgccagtc ggcacctgtt ggggctgaat atcaacctcg acacacaggg cgcagcctat
    25321 gttgcggcca ctagctacag cggcgacacg cttactgttt acccctactt ccctgaaacc
    25381 attaccgcta gcggattaga tgtcgtcggc gcgggcgttc acctgattga tacgatgaga
    25441 gtaacccaat gagtacgaaa tactttgtct tactaacgaa tattggtgca gccaagctgg
    25501 caaacgccac cgtgctaggt tcacatcttg atatcacgca tatggctgtg ggcgatggcg
    25561 gcggcacgct tccaacaccg aacccagcac aaaccgccct gattaatgaa aagcgacggg
    25621 cgggcatcaa tacactgagc gttgatccag taaataccaa tcagattatt gcggaacaag
    25681 tcattccaga aaatgaaggc ggattctgga tacgtgaaat cggcctgttt gacgctgacg
    25741 gcgatctggt cgcaataggg aactgcgccg agacgtacaa accattacta caagagggaa
    25801 gcggtcgtat tcagaccgtg cgtatgatcc tgattgtcag cagcactgac gcggtgacgt
    25861 tgaaaatcga tccggcagtc gtgctagcaa cgcggggcta tgttgatgat gctatcaatg
    25921 cacatgaaaa aagccgcaaa caccctgacg gcacgttaaa cgcaaaggga ttcgtgcaac
    25981 ttagcaacgc gacgaacagc gacagtgagc tactggccgc aacccctaaa gcggtgaaag
    26041 cggccgttac tgctgccaac aatgccgcca ccgcagcagc taacgcgaat accaacgcca
    26101 atggccgcgt gccgtctgca cggaaagtga acggtaaaga actgacagca gatatcgccc
    26161 ttattgctgc cgatgtgggg gcgtatacca aagcagaaac tgatacccgt gttgccacgg
    26221 caaccactgc tgccaacaat gccgccaccg cagcggctaa cgcgaatatc aacgccaatg
    26281 gccgcgtgcc gtctgcacgg aaggttaacg gtaaagcgct aacggctgat atcgccctta
    26341 ctgccaccga tgtaggggca tataccaaag cagaaactga tacccgcgtt gccacggcaa
    26401 ccaccgctgc caacaatgcc gccaccgcag cggctaacgc caacacgaac gctaatggcc
    26461 gcgtgccgtc cgggcgtacc gtcaacggta aagcgctgtc ggcagatatc gcgctgggtg
    26521 ccggggatgt gggggcatac accaaagcgg aaaccgacac ccgcgtcacc gcagcaacca
    26581 ccgccgcgaa taatgccgct acggcagcga ccaacgcgaa taccaacgct aatggccgcg
    26641 tgccgtcagg gcgtaccgtt aacggcaaag cgctatcggc agatatcgtg ctcactgctg
    26701 gtgacgttgg tgcgctgact gcgggtggca ctgcggctgc ggctactaag ctggctacag
    26761 cccgcaaaat caacggcgtg gcatttgacg gttcggcaga tattatcgtt gattctgact
    26821 ggtcacagat taaaaacgtt cccgcggcat catatgacgt cgcgggtgtg gtggtgttga
    26881 gctcgtcaat taacagtaat agcagaacta ttgctgcgac agcgcagcag ctttttacgg
    26941 ctcactctat tgcaactaac gcgctggcaa aagcgactgc ggcgttgcca gcggatggaa
    27001 ctgcggcggc ggcgactaaa ttggcgaccc ccagaaaaat taatggcgta gcatttgatg
    27061 gtacatcgga cattgatcta aatgggtcac gagtatggat ttcgggtgag tacacgcctg
    27121 caaccagcac gccaatcgta gtgtctcacg gattggtcgg tattaatccc ctgcactgtc
    27181 gttgcgatgt gttggttaaa tgtgtcgtcg cagaaggcga ataccgcgct ggtgagtttg
    27241 cgattaatcc catgacactt tttatgcagc aaggtgtcgc ccatccctat tcgttgttgc
    27301 cagcattaaa tgcaggcact gtgcagttga acatcatgca ctatctggct gcgtcattta
    27361 aaaccagcac gataggcaat cagcaactga atatggctaa ttggcgttgt attcttcgta
    27421 ttttttatta ggggtataat agatggatat tcaatattgg aaacacaagg atggatggat
    27481 ctatattgga aatgaaatgg agggtgccag acccgctaca gatgaagaga taaatattca
    27541 tcagcgtacc gtgtatttac ctgatgttgt atcacatgcg gtaagttcat aaatgtaaag
    27601 tggttgcatc tcatagcgaa atgcaactac atattttaag caaatgacat tctctttatt
    27661 tttgatatga atttctcttc aatgagatag taggaaattg tcgccatcat aaggttgaac
    27721 acacctacaa ctatccaaac ttggtagttt tccattccaa aaaaaacact cggatatttt
    27781 acaaaaaaca atattattgg tatttgcata agataaaaag agtaacttat cttacctagc
    27841 caaacaaacg gacgtgtaag tgaatttatt tcaatctttg agcaagcaaa aacaaaaacc
    27901 aaagatgcgg ttgccagtac ggtggcgaaa tttctcttca tgaatccgta attacctact
    27961 ggcgaaacaa aaagtagaat caataaagaa aaaccgacta acaataactt gtgctttttc
    28021 aatgttaatt gaaaaccatt tatatacata gcaccaagag ccattccaat gacaaactcg
    28081 ggaagccgat gtattgggct tatataaaag tatggcatct tatctgagtt accaaaaacc
    28141 atgacaaaag gaataattag cgaagttaca atatatgcta ttaataaaga tgctttagga
    28201 ttcttgttaa ccaatggaag tattagagga aataccatat agaaaaaaag ttctgtggag
    28261 accgaccaag accctccaaa gtgccaagaa aaaaaagaat caggtatcca agattgcatc
    28321 cctgtaaaat acaacacaag agatggtatt aattttccac tttcaacatc aaataaaaaa
    28381 ggaagtgaaa ttatccccat aaaaatatat gctggatata ttcttgatat tcttgccttg
    28441 acataatcac ttcggatgcc atttctggca gaccaagcca taacaaaacc cgacaagacg
    28501 aaaaaaaatg acataccaac ggcaccatta ttgattactc tcgtaataaa atggggtaca
    28561 tcaagagggt atctgatttg acaatggaaa acgaaaacat aaaaggccgc gataaatctg
    28621 aaaatggtca atccgtgtaa ttggttatta cttgagccat tttggtttga gaaactcccc
    28681 atacttctta tccctgtgcg atttccaatg acccacagtt atcgggggga tttctaattt
    28741 ctttaggttt ttatcagaac atccaagtta agtgctgaat ttacagtcaa tcgcaaacgt
    28801 gaattgatcg ctacggccga tcaataacgc aaaatcgatc tgtataaacg tttataaaat
    28861 agtcacctgc aatgtcatta tgttgttggt tttaaaaaaa taatgaacta tcagggaaag
    28921 ccaagcccat cgtccgcgga cggtgggctt ttttcatcga gtacagttaa aagcgtctgt
    28981 gttatccgga tagcccgata tccatatcac ccagcatttc ccgcaaatcc tcgctaaccc
    29041 gctcaaggtt caatgtaaat gagatatgcc gcgctttccc atcattaaaa aactcagaac
    29101 gggttttgtt aatgttggta atcacgtaca taccgtagat gttgcccgtc ccttcgatca
    29161 gcggccaggc ttttcctgtg taggccattg tttccagcac gtttaatgac acgtcaccgc
    29221 cggttatttc tgggtacagc tcaccagcca gagtgatttt atcttcccct gcgccgatgt
    29281 actgataacg cggggatctg cctactcggt catttttaac atgtcgccag ctgctgtcat
    29341 ggcttaggga ttggtacggc gcagtttgcc gcatgaaaac gaacataccc agaatcatca
    29401 tcatgataaa agccctatac gtgatcggtt agttgtgagc gctggcgacg ctgcttacga
    29461 cgttcaatat cgtctatttc ccgccgcagt ctggcgacga gtttgtcttc atccaggctg
    29521 cgtgcatcct gaatcgtgat attgatttca tatttgtctg tgctggccat accggcagac
    29581 atcgccgttt tcatctgtgc tgcaggtgaa ttgatggccg gaacgtccgc cccagcaggt
    29641 tgcaccgtga acggtaggac agacgcggcc aacacaccgg cggtttgctt cacccgttcc
    29701 agtaagggga ctttgggctg tgcaggcata acctgtgatt cacggtagcc gttcgccagc
    29761 atgacggcag gcggcacgtt tttaaaaaca atatcgccca gcttattggg atcttttttc
    29821 tcttcagtgg ttgccgtgct gcctgatttt tctgttttgg gattgctgcc agtcagatcc
    29881 tgcaacgctc cagttttagg cttgttgctt tcacctgccg gtggttttgc tgcctcacca
    29941 gttttaataa ctgcatcggc ttctttgggg ggctgtggtt tccattcctg cgccaccatt
    30001 ttcttttgtt tctcatccca cacgtacatg accggctttt tagattcatg gcctttttgt
    30061 gggatcgccc cattcatggc atttgatgct gagacggcgg catttgcggc ttcagggatc
    30121 acccctaatt tttccagtat ccagccaatg ccttcagcaa ctttcaaaat aaccgtcact
    30181 acgccaccaa tcgccatgcc aaccacttca ccaaatactt tccccgcttc ggtgcattgt
    30241 ttcagcgatt cggatgaggt gttgactggt tcaaacagtt ttttgaacca gtcccatacg
    30301 ccactaatgg cacgaccgat cccgtcgaaa atgggtgata acgcagagaa cgattgttta
    30361 accggttcca ggccagcaac cagaccgcta aaatagccac tgaaaaacgc cttgatcggt
    30421 tcccagtatt tgtaaatcaa tacaccggcc gcaacgattg ccgcaccgat aatgccgata
    30481 ggactgagca acagcatgaa gccggtacgc aggatattaa ataccgccat ccccgaaccg
    30541 ctcagtgcag aaaatcccga tgtcgccagc attcgcacgc cattacctaa cgccgatagc
    30601 gctgcgcctg gctgagtgaa taccatcaac aacgcacggc ctgcaccttg agcgatattg
    30661 ccaataccac cgatgccact gcgtatactg gtaaggatgc caccccacgc gcgagtgctg
    30721 gacaggctcc ccgtaatcat attgcggaat cgactgaaca ttccggtcgc cggtccaatc
    30781 cctctgccac ccgttaacag agaaaaacca agctgaagtt tggcgaatgg gcccatcaat
    30841 atgccagtcg caagggagac ggtgccgatg gctgcggtga gcgccaacgc accgcccaca
    30901 accacaagca gtgtttgagc caactcaggg ttagccgtta cccattcacg gacactattt
    30961 actaacgccg tggcgccctg agccagcgaa cgcagaacac ctgaatcatt ttcaaagatg
    31021 gcaaaacgta acccactcag tgcgccaccc agcttgtcga tatcccccga caggttatcg
    31081 cgtaacgtgc tgcccatacg ttcggccgtt ccgctaacat tgctgaattg gtctgtggta
    31141 ttggctagcg ctgacaggaa gttagggatc tgatcgatag aaaggtcttc tatcggggtg
    31201 ccgaataatg caatggctgc attcgcccgc gcggctgggt ctttaatctt caatagcccc
    31261 tgtgcagttt gctgcatcgc gttacgcgcc tgtgcaccgc cgcttgcgat agcagatgac
    31321 gcgcgctgtg cattcagtcc gattgcgtca tacgcctcta cactggcttt ggacatgtca
    31381 gagccgcgaa ttgaaaattc tttgatggcg tcgccagtct tatccagcgc aaactttcct
    31441 tgctgtgcca tgctgacaag cagtgtcata gcttcagaac cgctgtaacc catgttcctg
    31501 aaatgcgttg agtactcatg caatatctca ggtaactcgc cgcgcatctg agtagacacg
    31561 cgttgcattc ctgccgccat cagatcgaat gcttcatcgc tgctgcgagc caggccattt
    31621 ttcatcataa tggcggcaat ctggatatgt tccgccgtat cgccgccaag cacggattgc
    31681 atatctaacg ctttgcgcga gatccggtct aactcagctt caccgacctc acctaatgcg
    31741 cctagcgagc tacgcaccgc agatacagtg ctggcgatct gagcgaggtc attgctcaca
    31801 ccggcgctat taatcccttt aatgattttc gaatactgcg tacccattgc aggagcttca
    31861 gcgttttgcg cggcaatcac tgcgccgctt ttgtctgatt gcagattagg ggccatcatt
    31921 ctggcaccga catacgcacc ggctgcactt gcacctattg ccattgcccc tgtgctacgc
    31981 aggttactcg ccgtctgctg catcctatcg tagcgtgctt gagcctgcgt cactgccgct
    32041 aaccgccgtt tctgttccgc taacatgcgg ttatagcgtg cggtttgatc gctaatctgg
    32101 tctgttgccc tgcggctgca atcgagtatc acgccgtgcc gcgccagctc tgcccgcagt
    32161 tgttttaact gttcggtttc gttggtctga gccgttgata attgcctgat tagctcacgc
    32221 tgccgtttca gggccgcgtt ttgttcgtcc gttcgcgcac tggcggcacc aaattcggca
    32281 cgcatcgcgg cggctttggc tttagcttgt tccagttcac gggttgtttt agcggatgca
    32341 gcgctcagac ggtcgaagct gctggcctga cgtcctaacc cgttgagggt gttttgtgtt
    32401 gctctgattt ggtcagccag cgccgcagtg ccgctgcgtg cagcactgac gggccgagcc
    32461 atattattga tcgcgctgaa cgccacgcga atattgagat tgcgatctgt cattccgagt
    32521 ttccgcttct aacggctgct cggctgcgcc atgccagcag ctcatctact ggcatggcat
    32581 ccatcgccga cggcaaccaa tggaaaattg ctgcgatgtc ggccatcacc tcttcaacac
    32641 tgttaaacgg gcaatgaatt acgccgttac cgcgcccgtc tcgttcgctg gggaagaggg
    32701 ttgcaaaaaa gtcgccaccg cattggagag ttggcaaaaa tcccaggtat ccatcgtggt
    32761 aagttcttct ttcgtcagcg caggactggt aacgcgcggg agtaacgtca gcaaactatc
    32821 aacatcggat gtcatcacat cgtagacttt cagcccacgc agcgatccgg cctgtttcag
    32881 tgcgccggtg atcgtaactt ctttcacatc accgccttta cgcgtaatcg ggttttgcag
    32941 aatgacgacg ttattttgtt tctcagtcat ggtagacatt tccttttata acccaacgtt
    33001 agcgcggtgt ttttccagca tatcgacacc ggccacttta taaatcatgt tcagcacatc
    33061 cacttccatg acctcttcac cgctgatcgt cagcttgaag taggtatttt tcagggtgta
    33121 tttatgtgcc gtatcttcac ccacttttgc agagcctggg tcaagctcgg taaaccggcc
    33181 acgcgtctgg atttcacacg gcaccgcttc gcctgtggct tcatcctgat acgaaccggc
    33241 aaagcgcgtt tgcataccgt ccgcagtgga gacgccccac tttttcaaca agccagcatc
    33301 cagcccgccg agggtgattt ccatatccag cgcgcccgca tcaaaaccga agtcaatcgc
    33361 gacaaagcca ggcatgccgc ccgcctgata gtcttccgtc ttgcgcgtga gtttgggcgg
    33421 tgtcacttcc ggcacctggc cgaaatagtt gtcaccgtcg ataaacagat tgaagtattt
    33481 aagtttcttt ggcagagaca tgatttaccc cttacccgct gaacgtattg gcgaacgtcg
    33541 cgaagtattc gtcagtaaac tcctgcacca gatccaagtg ctccaatggc ggaacgggtg
    33601 tgtagttgta cttgatggtt aattttccgg tgcgtagcgt ttcgccggtg ttggtttctt
    33661 tgtcatacca acaattcgca cccagcagac ggccagcggt gaccagcgcc gttaacttgc
    33721 ggttgatgcc gtccacaata tcctttgcca atgagggcgt aagcggctta tcaatgtaga
    33781 agaaatgcgc ttctgcgatg gtgtctgcga ggatttgcgc tgtacgggta tagctttcaa
    33841 acagataggt ttcacggtca caggtgcgcg atccccaaaa gcgaaaaccg ttctgcttaa
    33901 tcagcgtggt gatgccgttg ctgttcagct cgtcggcgtc ggtatcggtt ccttgtagcg
    33961 tgaaatacac atctttgctc agtcccagca caccgtttac ggcaacgttg gataacacct
    34021 tgtgccagcc cgtctctgca tcaattttgg cacgcaggcc aaccgcaaac gctggcgcgg
    34081 gtacgattac gctttcccct tttgcggtgt cgtaggcaat aaaatcaggc cagatcacca
    34141 taagttcacg ctgggagaaa ttttcacggt acgttttcgc cgccgcgatg gttgcacagt
    34201 catgcgcact gacataagcg aacgcgttta gcttctcagc aatcacggct aactgtgcgg
    34261 caacggcttg ggtatcaagt tccggtacag ccagtacgcg tggacgaaca ccaattcgcg
    34321 cctctgccga tagcagtgca tacagccccg tgtagcgtcc gttagcatcg gaaccgccga
    34381 tcactaactg atcttgcgtc ggtttaggtt cattgccttc tgcctgcgca ttcgccgcat
    34441 ctgccacgcg gatcactacc gtttgagggc tggcctgatc ggaaatgcat ttcagcgtgg
    34501 tgtgtaacgt gcctgtttta cccgctttgc ccaacacgct ggcaacgcgg gttaacagta
    34561 ccggttcgtt taacgggaac gtatcagcgt cggcatcatc tgcggtacac accacgccga
    34621 tcactgccga gtcgatattg ttaatgatgg tgctgagatc cgttgtttct cggacggtca
    34681 caccgtgatg ataattagtc gccatgcttg ttgcctcaat gcgtcaaatg tccggcttca
    34741 tgattgcggg atttcgctgc ctgtgcacgg cgtttgcttt gttttaggag cgtgacaacc
    34801 gaggcaggtt gtccctacgc gcgcgtaacg cgagtattca ggcagagatc agggggtaac
    34861 aatgtcaatc atggacacgc taggggctat ttctggacgg ctggacgaat actcaccccg
    34921 tccggcgttt atggtgaggg ttggcgataa gcaagttaca gagctgaatg atcggctgat
    34981 gtcattatcg ctgacggata atcgcgggtt tgaagctgac tcactcgaat tagtgctgga
    35041 cgatgcagac ggaaaattag ccctgccgga gcgcggtgca aaggtcacgg tggcgctggg
    35101 ctgggcgaat gaaccgctaa tcagcaaagg gacattcacg gttgatgaaa ttgcgcatcg
    35161 tggcccgccg gatcagttga ctatcagcgc ccgcagcgcg gatttcagag aaacatttaa
    35221 cgttaagcgt gaatacagtt ggcacaatgt gaccgtcggg tttgtggtat ctgccattgc
    35281 cagccgttac ggactgaaag ccggtgtgac agaacggctg tcgaagctgg aacttgacca
    35341 tgctgaccag acgaatgaat cagatatcag cttcctcaca cgtatggcag aaatggttgg
    35401 ggcaatcaca accataaaaa acggtatgtt gctgtttatt gttccagggc aggcggtttc
    35461 acaaagtggc aagccactac cggccatcac cattacacgc agtagcggag acagtcacag
    35521 cttccgcgtt gctgaccgcg acgcgtacac cggcgtgacc gcgtactggc tggatctgaa
    35581 ttttggcaag accaaaacga caaaggtaaa aaataaacgc aaaaccagta cgccagctaa
    35641 aaagaaagaa cccgcatcca gcagtaaaga ggggaattat ctgaagggaa cggaaggtaa
    35701 tgtttatgtc atgcgttcga cgtttaaaac cgagcaagcg gcaaaacgtg cagccgcagc
    35761 gaaatggtcg aagttacaac gcggtgccgc agaattcagt atgacgttag cgcgaggccg
    35821 tgccgattta tatcccgaat tacacgcccg tatgtctgga tttaaaacgg ttatcgacaa
    35881 tgccgattgg ataattacac gctgcgtaca tgaaatcagc caatcaggat ttacgacatc
    35941 gctggaattt gaagtgaaaa taacggattg ggcagcagac gataatgatg attaatgcaa
    36001 cgcctgtgta taatgacagt aacaccaacc gtttgagagg ttgtcatggc gatcaaatgt
    36061 ccaaagtgcc gcgcaactgc aaaaacacgt accagcgtag aacttagccc attggttcga
    36121 cgtagctatc accagtgcca aaacatgatg tgcggctact gctttaccag catgacgcat
    36181 attgatgaag cgctgaacga aacgaagccc gcgcctggcg catgtgtccc caccaatatc
    36241 tttccccgta gccacaaggg ggaaaatcag ttggatttag cgctgtagat tgttcaatcc
    36301 ggcttaacaa aagcggctaa attcttggcc gcttttttca tgcctaaaat cagtgctgcc
    36361 actctgctgc cattttgctg ccactcgccc tttttcaggc acaaaaaaac cgcctttcgg
    36421 cggttgaatt ttattttata acttcttgtt tttattgaag t
//
