# Supplementary material for: May the Phage be With You? Prophage-Like Elements in the Genomes of Soft Rot Pectobacteriaceae: Pectobacterium spp. and Dickeya spp
Source: Front Microbiol. 2019 Feb 14;10:138. doi: 10.3389/fmicb.2019.00138 (PMC6385640; doi:10.3389/fmicb.2019.00138)
Supplement: Supplementary file 2 [file Data_Sheet_2.ZIP › Supplementary_prophagesGENBANK_files/Genbank FILES _SRP_prophages/phiPcc2.gb]

LOCUS       Exported               47690 bp ds-DNA     linear   UNK 02-AUG-2018
DEFINITION  phiPcc2.
ACCESSION   .
VERSION     .
KEYWORDS    .
SOURCE      phiPcc2
  ORGANISM  phiPcc2
REFERENCE   1  (bases 1 to 47690)
  AUTHORS   .
  TITLE     Direct Submission
  JOURNAL   Exported Aug 2, 2018 from SnapGene Viewer 4.2.3
            http://www.snapgene.com
FEATURES             Location/Qualifiers
     source          1..47690
                     /organism="prophage phiPcc2"
                     /mol_type="genomic DNA"
                     /note="/genome_id=6666666.357184"
                     /note="/genome_md5="
                     /note="/project=robertczajkowski_6666666"
                     /db_xref="taxon:6666666"
     CDS             1..2052
                     /codon_start=1
                     /product="Protease II (EC 3.4.21.83)"
                     /EC_number="3.4.21.83"
                     /label=Protease II
                     /db_xref="SEED:fig|6666666.357184.peg.1"
                     /translation="MKTPQAEKRPHALSTHGDTRIDNYYWLRDDQRTDPQVLDYLKQEN
                     AYSEAVMSPHDARKRALYDEMVKRIPSTDMSVPYVRKGYRYQSRYEQGKEYAIYLRQPE
                     QATDVWETLLDGNQRAEGHEFYSLGTLEVSPDNTLLALSEDFLSRRQYTLRFRDLNSGE
                     WLPDVIENVTAGAEWSADSTVLYYVRKHEQTLLPYQVYRHRLGSDPALDELVYEEKDDT
                     YYVSLSKTTSEHYITIYLSSTTTSEVLLLDATRPDALPQIGIPRRKDHEYGIDHYQDKF
                     YLRSNREGKNFGLYRSDRPDEQTLETLIAPHEHRVLEGFELFRDWLVVEERERGLTRLR
                     QIHWQTQEEKAITFNDASYVTWLSYNPTPETALMRYGYSSMTTPSTLYELNLDTGEQQL
                     LKQAEVKDFSPDNYRSERLWITVRDGVDVPVSLVYHRDHFSPGKNPILVYGYGAYSHSM
                     DPDFSVSRLSLLDRGFVFALTHIRGGGELGQQWYDDGRLLNKMHSFTDFIDVSQALIEK
                     GYGDRNNMFAMGGSAGGLLMGAVVNMAPDLFKGVVAQVPFVDVLTTMLDESIPLTTGEY
                     DEWGDPNEQIYYDYIKQYSPYDGITAQRYPHLLVTTGLHDSQVQYWEPAKWVAKLREVK
                     TDDRLVLLYTDMDAGHGGKSGRFKRYDDIALEYAFLLMVLEMVEEAHE"
     CDS             complement(2400..2630)
                     /codon_start=1
                     /product="DNA polymerase III theta subunit (EC 2.7.7.7)"
                     /EC_number="2.7.7.7"
                     /label=DNA polymerase III theta subunit
                     /db_xref="SEED:fig|6666666.357184.peg.2"
                     /db_xref="GO:0003887"
                     /translation="MGYNLAELSKEEMDKVNVDLAASGVAFKERYNMPVIPEVVEREQP
                     EYLRDYFRERVMFYRQRSLQFSRLPYEPKSK"
     CDS             complement(2705..2824)
                     /codon_start=1
                     /product="hypothetical protein"
                     /label=hypothetical protein
                     /db_xref="SEED:fig|6666666.357184.peg.3"
                     /translation="MRIIFIIKNNNYERYYVWYICIKNDSHFVMRIINIHMIR"
     CDS             3004..3510
                     /codon_start=1
                     /product="Ferritin-like protein 2"
                     /label=Ferritin-like protein 2
                     /db_xref="SEED:fig|6666666.357184.peg.4"
                     /translation="MLKKEMIQKLNEQLNLEFYSANLYLQMSAWCGDKGFEGASSFLKT
                     HSQEEMQHMQRLFDYLDDTGSLPVLGAIAAPPIDFDSLADVFKLTYEHEQLITAKINEL
                     AHEAMALQDYSTFNFLQWYVAEQHEEEKLFRSILDKLALVKASEGGLFFIDQDLKKMSA
                     AAPST"
     CDS             3798..4151
                     /codon_start=1
                     /product="Uncharacterized protein YebY precursor"
                     /label=Uncharacterized protein YebY precursor
                     /db_xref="SEED:fig|6666666.357184.peg.5"
                     /translation="MKKFLLSIVLTSLSVNAFAAAKLANISRFEYGDRWAFTREEVQLI
                     CRPGNALYALHTGTLMQYPLNDVAIAQMKAGQVSAQPIDAIWLDDPKHPGQKKSLQPFI
                     ERAEQLCKPDAKP"
     CDS             complement(4468..5547)
                     /codon_start=1
                     /product="Phage integrase"
                     /label=Phage integrase
                     /db_xref="SEED:fig|6666666.357184.peg.6"
                     /translation="MARTTRYDANLPRNLTYRKKYKSFYWRNPLTGKEIPLGQIARRDA
                     VSQAIEANSFIEQSFSPVALIEKLKVKKELTMAEWLERYDVIIQRRDLAANTYKTRSGQ
                     LATIQQSLGGKILKEITTKDIAEFLEIYLQQEKLSMAAGFRSVLSDIFREAIVEGHIDN
                     NPVLPTRTPQPNVKRERLELEQYKAIRIAAEKQAQWFQLAMDLALVTGQRREDVAAIKF
                     SDIVDDRLLVEQGKTGNKLAIPLDLTIDAIGLRLCDVIEQCRNSSKTDYMISVGIRKNN
                     PNGAVELNGLTKGFVKARKASGIELDEKPPTFHEIRSLAGRLYEKERGKEFAQKLLGHK
                     SAKMTEKYLDTRGKDYVYL"
     CDS             complement(5525..5794)
                     /codon_start=1
                     /product="hypothetical protein"
                     /label=hypothetical protein
                     /db_xref="SEED:fig|6666666.357184.peg.7"
                     /translation="MGKLITLNEWCERHYSKDSLPTIQTLQRWARAGKIYPAPEKHGRE
                     YRVSEDAVFINPKDYKLSRRIIAERKGFNSDLVRRIINGKDDKV"
     CDS             complement(5870..6916)
                     /codon_start=1
                     /product="hypothetical protein"
                     /label=hypothetical protein
                     /db_xref="SEED:fig|6666666.357184.peg.8"
                     /translation="MENTSIVTTEQQAPNVMNNSVLLMRADIMEQIMNIADIMSKGVAT
                     VPKHLQGKSSDCLAIVMQAARWGMDPYVVGQKTHLVNGQLGYEAQLVNAVVTSSSAVRG
                     RFKYEYGGDWEKIVGKKDGRDESGLFIRVGAILRGEQEITWGEPVYLADITTRNSPLWK
                     TAPKQQIAYLAVKYWARLYCPEVIMGVYSPDEIEHRTEKEINPVPQRVNLSDLPTDAPE
                     TAATAQESTSNIDALADDFRDQIAKADDVDRATAIRADIETKKSVLGTALFTELKNKAV
                     KRYYQVNAKNQIEAEINSLPQPDEPDAVEKFAALEKSLAAAKRHLGDELHDQFAVTLCD
                     MKPEYINS"
     CDS             complement(6927..9692)
                     /codon_start=1
                     /product="Exodeoxyribonuclease VIII (EC 3.1.11.-)"
                     /label=Exodeoxyribonuclease VIII
                     /db_xref="SEED:fig|6666666.357184.peg.9"
                     /translation="MNTYAFLIKAKAKSEKKSLFCWLSAKSDSRAEREIMNILEDEEIA
                     TGRGGDYNLPLRTDWFVVDDLPEEGTLNDTWCDRYELNDDGKSWRQITKYESASISINN
                     DHASFSAQTASTQLADTAATDGTITIDQASFVQKVLGAWLFGSFTKLFTGQQGEISTLQ
                     HDMDATYVQNLLLALNNAKELLQEQHVFPETLFNLLDAIKSVWVPDGKAPSVGDIVSFS
                     KEWLNARNEGSTLERSGPYRSEVTTKWAKKSGVQRTESGAIAGDGSNTDRGYTHTLDTL
                     DIEIALFTTPFDFDIYNIPGPVYRRAKEIVANKEQPFKTWSLALRSMSGILSVFKAGIG
                     ALIRKANQDVTHFPDSLQRYINSTLTAEYYTTPTPELLALARHTPTDPATPENVEKVWA
                     GAEEALSGPTNTESQPEIKNVGKGMFSVDGLVNESQPLKQTQPLSIVDIARQQAATKTL
                     HDVNQSSSEIPSNEGEKPENDGVDNVQMETAGNQSSEADSALSTPANDDGSIEEAQAAL
                     ESTVNKWIGEGAAAAEPVEPAATDEPPYFEPGRYEGVPNSDYHAANGVSSTQVKDARVS
                     LMYFNARHVAKTIARENSKVLDMGNLVHALALQPENLLAEFSIEPEIPKGAFTTTATIR
                     AFIDEHNASLPAPLSADDIKVLLDEYNATLPPQVKTSGSRDALLEQLAVINPDLVAQEV
                     QKPAQLKVSGTKSDLIQSVKSVNPYAVFADELLDAWRENPEDKILVTRGQLATAQAIQK
                     ALLNHPTAGKLLTHPSRAVEVSYFGFDDETGLEVRVRPDLEIDLDGVRIGCDLKTISMW
                     NVKQDGLRAKLHREIIDRDYHLSAAMYCETAALDQFFWIFVNKDENYHWIAIVEASEEL
                     LELGMLEYRKAMRAIATGFDTGVWPAPIIEDYADELNDFDQRRLEALRMA"
     CDS             complement(9903..10091)
                     /codon_start=1
                     /product="hypothetical protein"
                     /label=hypothetical protein
                     /db_xref="SEED:fig|6666666.357184.peg.10"
                     /translation="METLFALVLVICTTTGECHEAVLGVYDTKQDCVADMYDQRVNGEC
                     WPVEGIIRADDQRPATK"
     CDS             complement(10091..10228)
                     /codon_start=1
                     /product="hypothetical protein"
                     /label=hypothetical protein
                     /db_xref="SEED:fig|6666666.357184.peg.11"
                     /translation="MGESMINQQQLRRAQRLAGKALRQRSSKKWDAANRIMARATGRGN
                     "
     CDS             10537..10659
                     /codon_start=1
                     /product="hypothetical protein"
                     /label=hypothetical protein
                     /db_xref="SEED:fig|6666666.357184.peg.12"
                     /translation="MVGVMRREFQAIKNPTEVGFPASSNDWRSYDKAISVVRRS"
     CDS             complement(11224..11604)
                     /codon_start=1
                     /product="putative DNA-binding protein"
                     /label=putative DNA-binding protein
                     /db_xref="SEED:fig|6666666.357184.peg.13"
                     /translation="MKEKDESALVERLTELTQRGISKAEMARRAGVTPQSVNGWFKKGV
                     ISKKSAIAIAEAADVSVAWLLGEDVEESTGLSSDEMKMLNLYRQLPEAERERMIDLFQL
                     RLKELDEYVEKYLRGRYKPAKD"
     CDS             11709..11936
                     /codon_start=1
                     /product="hypothetical protein"
                     /label=hypothetical protein
                     /db_xref="SEED:fig|6666666.357184.peg.14"
                     /translation="MNGLTKAIERAGTASNLAAKLGIKPMSVSRWKTRYKGVVPADRVL
                     AIYNATGVTPHELRPDLYPNPTDGLPTERK"
     CDS             11939..12502
                     /codon_start=1
                     /product="hypothetical protein"
                     /label=hypothetical protein
                     /db_xref="SEED:fig|6666666.357184.peg.15"
                     /translation="MHTQTYQDDNYAKTGLLKSRNQSRQSVSAHAAVRDAVDAWQKTLP
                     GRAQEAIAQLVVDEWRRRGGRGLQLGDSARNNRQNIFRWLDNPFNSKRYTGYIEQLTPI
                     IADVMPIEIARRYGLKKGKTKAELVATASRECSEAKQSALLGEPLRELEQKIREGVMSL
                     IQLAPPDRWAAVLDSTVTMFNGIF"
     CDS             12780..13511
                     /codon_start=1
                     /product="Phage-related protein"
                     /label=Phage-related protein
                     /db_xref="SEED:fig|6666666.357184.peg.16"
                     /translation="MKERGIIFNGDMVRAIIDGLKTQTRRVMKPQPTPCDYIDEHGNPR
                     GGHQWPSNIFRTMLHVERELQNGQGGWKGLVGDACPYGDVGDRIWVRETWMPDAPRDGT
                     WPDVEFYGCKGAPLSMIPDRFRRPEHCIHRASWTGSEMVGWTPSIHMPRWASRILLEIT
                     DVRVERLNDISEEDCWAEGIDAVDGCFENAEIIDMARKIGCCIDDAKPMFSLLWQSIYG
                     AESWSENPWVWAVSFKRIEGE"
     CDS             13511..14434
                     /codon_start=1
                     /product="Primosomal protein I"
                     /label=Primosomal protein I
                     /db_xref="SEED:fig|6666666.357184.peg.17"
                     /translation="MARIRTIKPEFWTDEDMAEASECACLLAIGLLNYADDEGYFNANP
                     KLIKAAVFPLREPSIPITVMLQELSNHGYLSMFSTPDDKSFGLIRNFKKHQVVNKGKES
                     KIKEMELIPYKYGTSTVSVPVGMDQGSGNGKEETPHIPREENLPPVENNGLPEYIPGID
                     EPIGKFPMFSGWRPSLDFRQRAALAGVVLTEDYQPTELAGFVMYWQPEGKAFHQLQWDQ
                     KFARHIQQVRSGAGKQKTGGNHAEKSNAGESQTVREIRAARAAWEREQQGVDSVGNHGG
                     NIFESVDEQERADANESLDGASWRVE"
     CDS             14409..14888
                     /codon_start=1
                     /product="Replication protein P"
                     /label=Replication protein P
                     /db_xref="SEED:fig|6666666.357184.peg.18"
                     /translation="MAQVGALSDQDLAKICSLCAERCASGNTWPPDLAEFMSLAAECGA
                     NPFGLNIAGVMAEYKRWRNESYRYSSSTEFPWRQPVLYHICIEMRRAGVEKRMTAGELE
                     RLAERLLNKWVKHVAHGMSIPPVRRQLAAPKHPGGPTPAQQMHEEYLRRKAAGLI"
     CDS             14910..15179
                     /codon_start=1
                     /product="hypothetical protein"
                     /label=hypothetical protein
                     /db_xref="SEED:fig|6666666.357184.peg.19"
                     /translation="MKTKMPVSQRMLRHIRRHEGMTRQEIARALNITSKEAGSTLNTLR
                     ENQRIVAVGMPGKYTYFLFRETQPAFGVHPAQARFTQLLSGVRA"
     CDS             15176..16267
                     /codon_start=1
                     /product="Phage protein"
                     /label=Phage protein
                     /db_xref="SEED:fig|6666666.357184.peg.20"
                     /translation="MKPEISTAVMIERVREMAADSSDSQDRVLFTQAANRIELLLAAES
                     GMSREMACIRHALDIPPDQSVQSGVVDAFVRLNAKIQDLSGQLSKPGNARWCPSVDPIS
                     GSKLFLWLEHPTLGCVPTYGGPYDSFTLTERDENGDFFRHRYDHDEGAWVDDEAVYLEE
                     QEGRQGQAYTVPDERAAYEAFIAKRLGDSIDTQRAKNGDPEKPDYMAWDMTVGWIAWQG
                     RAAMPQPSSNSTVSSALVAENLALKEIIDRVTDLDNEPQYHESGMGCGLEDRNITDRYE
                     AMRHGWDAAMERVYGEVIPCAEELSFPATEQAARELMAKGVDQAASGFHEKAFVAFDSS
                     NYPGLYIRAQLQLLAQQLRDGDA"
     CDS             16282..16518
                     /codon_start=1
                     /product="hypothetical protein"
                     /label=hypothetical protein
                     /db_xref="SEED:fig|6666666.357184.peg.21"
                     /translation="MGASSITGTVYYGTLNASKKMWVGPKIDVTDMAYRAVAESLMYKK
                     QDIIFTLNDGRELVLSASVRDASAKPEQKDGDA"
     CDS             16557..17261
                     /codon_start=1
                     /product="Methyltransferase (EC 2.1.1.-)"
                     /label=Methyltransferase
                     /db_xref="SEED:fig|6666666.357184.peg.22"
                     /translation="MFWHDKSDPRAVFMDNRNEQHTLCDGRSLVISPDIIADFRQLPFA
                     GESFPVVVFDPPHLERAGPEGWMRKKYGVLNPQTWRDDLCAGFSEAFRVLRPAGVLIFK
                     WNETQIPVSEILLLTEEKPIITQRTGKGDKTHWMIFIKSGRIQDNPESLLNYATSRIIE
                     LEAMLLVDAPETVWPAEVEMVYSQIESAGGLPAHHQRRLHHHINRMWLEKIPVPEIIKA
                     ARSLANAMENYA"
     CDS             17258..19237
                     /codon_start=1
                     /product="C-5 cytosine-specific DNA methylase family 
                     protein"
                     /label=C-5 cytosine-specific DNA methylase family protein
                     /db_xref="SEED:fig|6666666.357184.peg.23"
                     /translation="MREIIVDNFAGGGGASTGIEMAIGRSVDIAINHDPNAIAMHTTNH
                     PDTLHYCESVFDIDPVTATAGRPVGLAWFSPDCRHFSKAKGSKPVKKEIRGLAWIVLRW
                     ALAVRPRVMMLENVEEFKTWGPLLTNGDGTQQPDPARAGETFEAFCGMLSGGVPADHPA
                     LAEACEFLEIEPGSEHGKQLIRGLGYSVDYRELRACDYGAPTIRKRFFMVMRCDGQQVT
                     WPEATHGDPKSPAVQAGKLKPWRTAAECIDWSIPCPSIFERKKPLAENTLRRIARGLER
                     FVINNPQPFIVKCNHTSTKTRYDCFRGQSLNEPLQTITRTHGFAVVTPHLTKFRTGAVG
                     QEVTEPMPTITAGSSIRPGGNGHALGMVEAMLEPFIIGAGGPKYSAKPKSVEQPMNTLC
                     NTNHSALITPYIARIGQTGFGGNRMAYDAKDPLTTVVGKAEHLLVAPVVARQFGNSVGH
                     GTDEPSGTITAGGGGKSQLVSAFLAKHFGGNYTGPGANLDEPAHTVTTVDHHALVTSNL
                     IKMRGTNTGQRTDAPLQTVTAGGNHFGEVRAFLLKYYGNEKEGVSLNDPLHTVTTNDRF
                     GLVTVEGVDYQIVDIGMRMLQPHELYAAQGFPDWYIIDQDFRGVKYAKDKQVARCGNAV
                     PPPFAEALVRANLPDMCVKKQQAA"
     CDS             19307..19435
                     /codon_start=1
                     /product="hypothetical protein"
                     /label=hypothetical protein
                     /db_xref="SEED:fig|6666666.357184.peg.24"
                     /translation="MYSNFKVKPWQQNYRPQATQLSVVATMLSLQHFMIFQNLTVH"
     CDS             complement(19595..19732)
                     /codon_start=1
                     /product="hypothetical protein"
                     /label=hypothetical protein
                     /db_xref="SEED:fig|6666666.357184.peg.25"
                     /translation="MELLFHAAPRKVTAEYRKSLASLNVSDWGFDTFFCAIGSLRWRSS
                     "
     CDS             19715..20164
                     /codon_start=1
                     /product="Protein NinB"
                     /label=Protein NinB
                     /db_xref="SEED:fig|6666666.357184.peg.26"
                     /translation="MKQQFHLANDAVKQNAINFIRQLPVNEKLPLVVDIKEPSRTKAQN
                     NKMWPLLEDLSEQVVWFGSKYDKEDWKDLITAMIAKSKKQEQRMAPGLDGGIVMFGQRT
                     SKMNIPQMVEVIEAIYWFGTQQHVNFSEKSKLEIEWAKRWGDRNG"
     CDS             20157..20792
                     /codon_start=1
                     /product="Phage NinG rap recombination"
                     /label=Phage NinG rap recombination
                     /db_xref="SEED:fig|6666666.357184.peg.27"
                     /translation="MAKLPRRKCAHVQCREWFHPSRNGQIVCSYECAAAHGKIQADKAR
                     QRTQQQAERKRKEEAKEGRKQLKARKLALKTRNDWKREAQNAFNRYVRLRDEGKPCISC
                     GSAPAQKLGGTMDCGHYLTRGARPWLAFNLHNTACQCVRCNRDRAGAQKEFEDGLVERI
                     GLEKVEALNCDNTPRKFTIEYFQRIKSIFTRKARALQNRRSHHQEIAA"
     CDS             20789..21430
                     /codon_start=1
                     /product="Phage protein"
                     /label=Phage protein
                     /db_xref="SEED:fig|6666666.357184.peg.28"
                     /translation="MKCKVEGCERECTHYPRKGICQMHYFRMMRYGTYELTRSGKRKDR
                     SHNAKGYQMLHLPNHPLAMANGTVYEHRKVVYDKYGDDLPPCEKCGKHIDWKTAHIDHK
                     DEVVDNNKPENLRVLCRACNVMRARVYIPEHTKKGRSAITYEGVTKTASEWARDPRVNV
                     SACTIQVRIKRGMSIEDALFSPKTTHRHTKAKFINPAYGEYRGPKKQEAA"
     CDS             21427..22116
                     /codon_start=1
                     /product="Phage anti-termination"
                     /label=Phage anti-termination
                     /db_xref="SEED:fig|6666666.357184.peg.29"
                     /translation="MNDQYLQYVREEIMRATIDSSGRTKGQLTALVEQLQFTNDRYPRK
                     RQFIVDSATGQRVRLMNPPVSGRQSLAKGEAIPLIIPDEFLTASWRRAIGVIDECGCAW
                     IKWNYAGDTDFKLQTAIVQHGWQVFSESLKGKRVAGKTMEKLRALIWLAAQDVRAGLAG
                     RDILEQCKLAELAGVEDSNWCKNYSPYWRGMRDAFLSLDRDSLLATAKARSQQKSACSH
                     SAIAKVN"
     CDS             22408..22524
                     /codon_start=1
                     /product="hypothetical protein"
                     /label=hypothetical protein
                     /db_xref="SEED:fig|6666666.357184.peg.30"
                     /translation="MVYWPQSLVEKLSDNASVAAKSAGIWMPYRMREKLQIV"
     CDS             22683..22829
                     /codon_start=1
                     /product="Phage holin #lysis protein S"
                     /label=Phage holin #lysis protein S
                     /db_xref="SEED:fig|6666666.357184.peg.31"
                     /translation="MLQLLDTVSPTQWAAIGVLGSLVFGLLTFLVNLHFKIKEDRRKAA
                     RES"
     CDS             22829..23377
                     /codon_start=1
                     /product="Phage lysin (EC 3.2.1.17) # Phage lysozyme or 
                     muramidase (EC 3.2.1.17)"
                     /EC_number="3.2.1.17"
                     /label=Phage lysin
                     /db_xref="SEED:fig|6666666.357184.peg.32"
                     /translation="MSKRKIAAGVICSVSVIIGMVLDKGQLRTNKAGLELIGNAESCRR
                     EPYVCPAGVLTDGIGNTHGVVSGTRKTDEQIAADWEKNILVAERCINREFRGRDMSDNT
                     FSAMVSGAFRLGCTGLKTYYSRASGQRVQTSIHKWAQAGSWANMCNHLPDFVNGGGQRL
                     PGLVIRAEKEKALCLSGVQ"
     CDS             23356..23736
                     /codon_start=1
                     /product="Phage outer membrane lytic protein Rz"
                     /label=Phage outer membrane lytic protein Rz
                     /db_xref="SEED:fig|6666666.357184.peg.33"
                     /translation="MSIRRSVIIAAVSLVAGFVTGLYVQGLRWDADAAERDSAVSAANE
                     QRAEVITANVITSMRIINTITRANADAKQQIQNESETRIVHIRQSLSGERCAANPVPAD
                     VVNRLREHADRIRNGSSSFAPR"
     CDS             23756..23887
                     /codon_start=1
                     /product="hypothetical protein"
                     /label=hypothetical protein
                     /db_xref="SEED:fig|6666666.357184.peg.34"
                     /translation="MPEIPYQMTYGDSVELNERLLTVIAQCNADKRAIREIEGLRNN"
     CDS             24480..24977
                     /codon_start=1
                     /product="hypothetical protein"
                     /label=hypothetical protein
                     /db_xref="SEED:fig|6666666.357184.peg.35"
                     /translation="MLTPLQKRFVTLLLKGKSQVDAYRKAGGKAKGDSAHSKATQIVRN
                     SKVESFLASVQYEAVSSAIMTYEEAMERLTAMGRTSIADLATFGTHVVGEDDDGNPISQ
                     SVWSFKNASELKPEQMAAISELTAGKDGLKIKTPRPESRHQATGRNARVGSTEENRSDS
                     NG"
     CDS             24928..25041
                     /codon_start=1
                     /product="hypothetical protein"
                     /label=hypothetical protein
                     /db_xref="SEED:fig|6666666.357184.peg.36"
                     /translation="MRGWEAPKKTEVTATVKSENVNMTPDEAAEAYKKLMG"
     CDS             25261..26874
                     /codon_start=1
                     /product="Phage terminase, large subunit"
                     /label=Phage terminase, large subunit
                     /db_xref="SEED:fig|6666666.357184.peg.37"
                     /translation="MPIPFPFDFKKPDYTQVFEWRMERLQRIRQHPEQLPALRQFYKDN
                     PAQFIIDWGMTTDPRNIDYGLPVTIPFLLFPKQEEWIHWIMTRRQNLENGLTEKSREMG
                     LSWTAIGMACSLCLFNKDMVIGFGSRKEEYVDSTGDPKALFWKARKFVETLPVEFRGRW
                     DEKKHAPYMRVEFPETGAVLKGEAGDNIGRGDRTTLYFVDEAAFLQRPLLIDAALSQTT
                     RCRIDLSSVNGMNNPFAQKRHSGKIPVFTFHWRSDPRKDDEWYKKECEKIDNPVIVAQE
                     LDLNYQASAEGILIPSEWVQAAVDAHIKLGIQPCGQRLGSMDVADEGKDKNGFSARYGF
                     LLQDVKEWSGEGSDIYASVVKVFGYCDDFGLDEFRFDEDGLGAGARGDARVINELRQAE
                     RLGYITATPFRGSGSVFDPDDEAVPGDNGKPARLNKDFFANAKAQSWWHLRKLFRNTFR
                     AIQGMDYDPDEIISISSTIENKDRLLMELSQPTWSKNAVGKILVDKQPEGTKSPNLADS
                     VMINYAPMNTAMDIWAKLGA"
     CDS             26947..28326
                     /codon_start=1
                     /product="Phage protein"
                     /label=Phage protein
                     /db_xref="SEED:fig|6666666.357184.peg.38"
                     /translation="MQQPNQHAASTYRANYTSRNRLLIEYAYRSSWIIGAAVDSKADDM
                     TKKGVRITSEIDPKRRGILESRFDELQLWDCINETLKWSRLYGGAVALILIDGQAPLTP
                     LILDKVGKGSFKGLAVLDRWMINPQLNRRIKALGPNLGKPEVYDIVTTAQGLPAWTVHH
                     SRLIRMDGVKLPYQQKITENEWGMSIVERIFDRLTSYDSTSVGAAQLAYKAHLRTAKIK
                     KLREIIAMGGKPFEALLKNMDMVRQFQTNEGMSLFDAEDTFETHSYSFAGLSDLLSEFK
                     EDIAGAVGIPLVRLFRQSPKGFSTGDADLANYYDDVGTLQERDLRPHIRLLFDVLHRSE
                     FGEPLPEDFTFEFNPLWQMSDVDRSTVATNTTTALATAVRDLGMSPAAALTDLRELADV
                     TGVGASITDGDIQNAAKEWAEFELEAGPPPEIRESVPQKPTGDSAASRGGRSWFVRWFS
                     G"
     CDS             28352..28936
                     /codon_start=1
                     /product="Phage protein"
                     /label=Phage protein
                     /db_xref="SEED:fig|6666666.357184.peg.39"
                     /translation="MDYSDVIGDWAEMVGKKMFAQVEEEEWNQWRSVSQEIAAGLRDIV
                     GNTPVGYVAQDIVARQVQYMKSLPLEAASRVSEIQQRAMQAVINGERPDQLYEMIMQSG
                     DVAASRAKMIARTEIGRATGALTQARALAVGSEGYWWRIEGAGTRPSHRKMKDVFVRWD
                     NPPTLDGMTGHAGCLPNCKCWPEVQIPAPRG"
     CDS             29060..29224
                     /codon_start=1
                     /product="hypothetical protein"
                     /label=hypothetical protein
                     /db_xref="SEED:fig|6666666.357184.peg.40"
                     /translation="MALTNERLIDSLRHNRKLLDEIYQSGKSQYYNTDIIHDAIDSILD
                     ELRRRRFPV"
     CDS             29278..30474
                     /codon_start=1
                     /product="Phage protein"
                     /label=Phage protein
                     /db_xref="SEED:fig|6666666.357184.peg.41"
                     /translation="MKYFFKTRLGNTRYQLADGSVLFKDVPIGRTGEQVYGAEELPDIE
                     PDSQGLIVVRRTPEEVFSEQTIASFEGMAITIGHPKDFSGNIIFVTPKNWRQLANGHIQ
                     NVRRGKGDKSDLLVADVIAKTPEAVDAVENGDDEVSCGYDADYRQLSPGVADQYAITGN
                     HLALVPNGRAGSRCALGDSMPNKAKNWWERLVRARKTNDAAEMANLIDNPPDNMTGDDD
                     VSSSVTPGGVVINLSPQNPMPASTLPGTGDAEEDIPAWGKALIEAVAKLTPAAPATGDE
                     DEEENKEEEGAVTGDAAYRADLIQPGIQLPVKAKPTAFKRSVLAAADQTMVRSIVGDAD
                     ITKLKKATVDMAFNAVSELAKNRNTAAKTTDGFRSINSNTTKTIAEINAAAKEIWAKR"
     CDS             30486..30980
                     /codon_start=1
                     /product="Phage protein"
                     /label=Phage protein
                     /db_xref="SEED:fig|6666666.357184.peg.42"
                     /translation="MDNTLLYRMPSGIAGAISRPQDLTVEPQTLDGTKAFAAYGLAGKF
                     SAGKFVPIEAADTAAVVVGIYVRPYPTASQPDKVRQIGTGFNFAGDCMRRGYVTVNLGA
                     DASSVALGGAVYMRVATPSASSPLGSFLAAADGTNTVQITNAYFNGPGDANGNIELAFN
                     I"
     CDS             30992..31933
                     /codon_start=1
                     /product="Phage protein"
                     /label=Phage protein
                     /db_xref="SEED:fig|6666666.357184.peg.43"
                     /translation="MPMTFDQATIDSSGAFLVHELERLDQNLNLPLTSQTWSRDIQLRE
                     DVSIADEISSFTNTTFAAAGTPNANGKNWISPLATAIAGINVDIEKKGFPLELWGMELG
                     WTVIELNAAAQVGRPIDTQKYDGMQLKWNMDTDEQVYIGDLAKGAKGLLNLIQVTPTNA
                     TKTWATSTADEIRASINQVLSNAWSRSAYSKVPEDLLIPPEQYSFLASTIVSSAGNQSL
                     LTYLETNTIAYHQNGKPLNIRPVKWMKGRGVGGTDRMVAYTNDKKFVRFPMVPLQNVPI
                     QYRGLYQLVTYYGKLGAVEPVYPETLNYMDGI"
     CDS             31979..32317
                     /codon_start=1
                     /product="hypothetical protein"
                     /label=hypothetical protein
                     /db_xref="SEED:fig|6666666.357184.peg.44"
                     /translation="MKKIYVLVAFNFNDGEKITPFAAGFHSVDDAVAEHWFVKAHCSPD
                     GAAPEIAVSDTRIAELEALLSQKDADLQASALTAAEKDTRIAELEAEAKNLTAKVDELS
                     KAAGNGKK"
     CDS             32280..32720
                     /codon_start=1
                     /product="putative bacteriophage protein"
                     /label=putative bacteriophage protein
                     /db_xref="SEED:fig|6666666.357184.peg.45"
                     /translation="MSFLRLLGMAKNNSLPTVAQFRETFPQFSNETTYPNASIQMRLTL
                     VDALMSESRFGPDVFPYVAGLFVAHYMALAAVDNRSVATGGAGGVNTGIMTAKSVDKVS
                     ASYDASNTLNPDAGFWNNTRYGSEFWEYLMIFGTGAIQLGTP"
     CDS             32720..33220
                     /codon_start=1
                     /product="Phage protein"
                     /label=Phage protein
                     /db_xref="SEED:fig|6666666.357184.peg.46"
                     /translation="MKSGVKVTSDNADSIIDALTRLSGMDVLVGIPEGNASRDDGQLNN
                     AEIGYLQSTGATIEIDGAVVTLPPRPFLDIGIEDTRERTTAHLKAAAELALEGNAAGAE
                     RELERAGIIASDGAKKVISDGDRLAPLSEKTLKKRRANGLLGEKPLYAHGYLLRSITYV
                     VRK"
     CDS             33223..33630
                     /codon_start=1
                     /product="Phage protein"
                     /label=Phage protein
                     /db_xref="SEED:fig|6666666.357184.peg.47"
                     /translation="MPLLDVSEILLDPDFADFSLICHRQVQTVDDDNFPTNTPQDIPFS
                     GVVTVDRSLEARRMAAGQNIRGAILIVTQFRLTQGQPSSGTTPRLDADVVTYNGRRYRV
                     TFVDPYTSYGAGFVQAHCELMDFDGGIPVEQ"
     CDS             33620..34162
                     /codon_start=1
                     /product="putative bacteriophage protein"
                     /label=putative bacteriophage protein
                     /db_xref="SEED:fig|6666666.357184.peg.48"
                     /translation="MSNDSTSRGYLSPVGDTPAYDEELEREISRWIRGVSGLPVAQVFP
                     RWTDPQPQIPKNGVTWCGFGITTVPQPLSQSDVQVSEDQSEQWSWESVTVICCFYGPLG
                     ASTAATFRAGIFVEQNNAELNLTGLSLVEAGTLYNLPELINNQWVRRYDITVTLSRKNT
                     RTYNIKTLVDAPVFFGD"
     CDS             34166..35314
                     /codon_start=1
                     /product="Phage-related protein"
                     /label=Phage-related protein
                     /db_xref="SEED:fig|6666666.357184.peg.49"
                     /translation="MAQQGLPLSNVVNVDVIMSPTAATGRNFGSLLILGTSTIIPVTER
                     LRLYSGVEDIGDDFGVDSPEYAAATVFFSQSPKPTQVYIGRWAKTLAAGETGAVETLIQ
                     AVNASLQFTNWYGLGVADSADLLDADVLAVAAAIESARVSRIFAVTTDAAATLSTTSTD
                     DLASKLKAAGYARTFTQYSTSSKYAALSAFGRAFTVNFNGSNTTITLKFKQEPGVTYET
                     LQINQAAAVDAKNCNVYVYYENDTAILQQGVMANGDFFDERHGMDWLQNYVQTNLYNVL
                     YTSTTKVPQTDAGVTRLLANVEQSMDQGVTNGLIAPGVWNGGPIGQLASGDTLTKGYYV
                     YAQPISAQAQADREARKAPVIQVACKLAGAVHYADVQINVVR"
     CDS             35324..35764
                     /codon_start=1
                     /product="putative bacteriophage protein"
                     /label=putative bacteriophage protein
                     /db_xref="SEED:fig|6666666.357184.peg.50"
                     /translation="MSTYSFLDVTASLAGPTGIVDFGYGSAASEEGITITMTEAKNTMT
                     IGADGEVMHSLHAGKSGTITVTLLKTSPVNKKLSLAYNAQSQSSATWGNNVIVVRNKAS
                     GDTSTARSVAFQKQPDHANAKIGNTVSWVFDCGKIDQLLGEF"
     CDS             35765..36175
                     /codon_start=1
                     /product="putative bacteriophage protein"
                     /label=putative bacteriophage protein
                     /db_xref="SEED:fig|6666666.357184.peg.51"
                     /translation="MEITLKSHDYRLSKLGVFDQLKVTRKLLPMLAGMLSNAGDLKSLQ
                     ADGVTQALPQIADAIAALPDDDVNAIIHPCLAVVARKHDKAWTPVFSHGELMFDDIDLF
                     TMLSLVARVVADSLGNFLHELPASETPTPPAA"
     CDS             36211..36363
                     /codon_start=1
                     /product="hypothetical protein"
                     /label=hypothetical protein
                     /db_xref="SEED:fig|6666666.357184.peg.52"
                     /translation="MRPVDAGYIPYTALNDGSVDLADIARMNDYLDMKADNEYRIAKWR
                     ADNER"
     CDS             36405..38318
                     /codon_start=1
                     /product="Membrane-bound lytic murein transglycosylase D 
                     precursor (EC 3.2.1.-)"
                     /label=Membrane-bound lytic murein transglycosylase D
                     /db_xref="SEED:fig|6666666.357184.peg.53"
                     /translation="MKRDSANLRRGLISATAKVVKLGVAVEAAALSVVAFTTKIASGLD
                     DLYWASQRTGATVAGIQRIGYAVGQMGGSVNAARSSLENLAQFIRNSPGAEGFLNRLGV
                     QTRDASGQMRDMASIFTGVGQRLNSMPYYRANQYAQMLGIDENTLMAMRRGLGQFSAEY
                     TATAKAIGFNAEQAAASSNRFMTSLSSFGMMAGMARDKIGANLASGLAGSIDNFRKLIV
                     DNFPRIEAGITAVIKSILWLADIVGRVVYRLVQAAGSIVDWWKSLDDSTRQLIALFGAL
                     VTAWYVLNSAFTASPIGRIIMLVVALAALIEDYATWKEGGQSLIDWAKWEPEINAAIDG
                     IHDTIDAVKELALEVGALFGIDPKQWSLKWEFSNLIHNLGELGKMLKLIGDLLNAINEG
                     RWSDAASIGKQLLNQGDENPSAMPGIDAAAVRHREWLLGKYHNLNNKVNEFLPEWLGGV
                     KRPQPTKSGAQLLGWITPLFNQLENLYKLPSGLLRSVATTESAGNPNAISSAGAQGLFQ
                     IMPGTGRDLGLRGNDAFDPVKSANAAAKYLSQLLQANGGDLDKALASYNWGIGNVQKHG
                     MALMPRETRQYIPKVRSGMPSINQETNITVYGATDAQATADAIAGSQDGVNSRLTQQPE
                     PN"
     CDS             38318..38941
                     /codon_start=1
                     /product="putative bacteriophage protein"
                     /label=putative bacteriophage protein
                     /db_xref="SEED:fig|6666666.357184.peg.54"
                     /translation="MDVLSVLFNQRSRSIGLIIPDVVISEKHSDVLEITEHPVERPTNI
                     VASQYSGTISDHAYRRPSEIVMEVGFAGGGSLLDSSLLDTSRIGLSIGLSPKEVYQQLL
                     DLQRLRLPFDVTTGKRQYQNMLIRSLDVTTDRTSENVLMAVITLREVIISETSDINVAP
                     KENMTLGTSTSAVIDSGVKTPTPVNNRSVLSSIGGAISGLVGGL"
     CDS             38938..39240
                     /codon_start=1
                     /product="putative bacteriophage protein"
                     /label=putative bacteriophage protein
                     /db_xref="SEED:fig|6666666.357184.peg.55"
                     /translation="MNVTEIPLSPNNQTFSTQLNGGTYQISIVWRETFWSLDLMDSAGV
                     LIAGSIPLITGYDLLLQYAYLNMGFSLIVVCDVAGQENPTKTDLGIYSHLYVVTE"
     CDS             39243..40346
                     /codon_start=1
                     /product="Phage protein"
                     /label=Phage protein
                     /db_xref="SEED:fig|6666666.357184.peg.56"
                     /translation="MSKNWMRHFELQVLNDKGEGISLSNFKVTFNIEKMPSSQFGGFVG
                     NFRIYNLSRDTQNRIMGNEFSKIRVIAGYDGIAPDVKAADVGIARSVNADDVGQMDDRN
                     YGLIFNGDIRFTIKGKDNATDSWILLQCIDCWEGHLHGRVKTTVAAGWTYEDLFNLGMK
                     SLEPFGITRGNVPDVLHNTVFPRGCTIYSTTSKLMTEIAENCNAYFWYDNNQVNIIPKD
                     KYIGAKAVVLNADTGLIGMPQQTMGGGVNVRCLINPNIKLGGLIRIDQASVYRAALGNG
                     DVAMANGRISERNQDGVLVVDTPQRPKMIDTDIAYAGPGVDADGDYFVGMINYTGDTRG
                     QAWYMDLLCLAKGNMSPMSNQNFNKAF"
     CDS             40348..40698
                     /codon_start=1
                     /product="putative exported protein"
                     /label=putative exported protein
                     /db_xref="SEED:fig|6666666.357184.peg.57"
                     /translation="MKKWSLCACLIYCLSTGAAFADSQCGPFYLGTSAADDGWARINGQ
                     RPETQKATFLKEKDDYSNIKIQWMLLDAKAGRWLGLDYIKRDKKALLNVEVIRKNMDEP
                     RRFWTYDCIKIQ"
     CDS             41140..41502
                     /codon_start=1
                     /product="hypothetical protein"
                     /label=hypothetical protein
                     /db_xref="SEED:fig|6666666.357184.peg.58"
                     /translation="MDIEMFEKAFSYLEKTGLLETSLSDEQRREVMFMRGLGQKLEFIS
                     PFAKLAMEIAENERLNVINSYVSGDNEDGYCYALIVDEQDPDKLLELNNLAVEMIIKRE
                     MQHVDCVTVFISEEEL"
     CDS             41685..41906
                     /codon_start=1
                     /product="hypothetical protein"
                     /label=hypothetical protein
                     /db_xref="SEED:fig|6666666.357184.peg.59"
                     /translation="MHKRFYSYLIDNAADNHGLDKEKTVKVGLALKQAHALRIAADYLL
                     EQRISRPTAEMAYKKALEINTLIEDINK"
     CDS             41943..42698
                     /codon_start=1
                     /product="Phage-related protein"
                     /label=Phage-related protein
                     /db_xref="SEED:fig|6666666.357184.peg.60"
                     /translation="MPVPLKSQTNSEQDLIDTVMNRVMSNLRVAMPGVIQSFNPDDVTC
                     VVQPSIMGQDTGSDSNKESNPLQLLTDVPVVFQRGGGCTLTFPIEPGDECLIIFADRCI
                     DFWWQSGGVQEPVSNRMHSLSDAFVIVGAQSQANKISGISTSAAQLRTDDGAAFVEVAA
                     GHNITVTTPGKLTASAQGGTEITSPSIVLNGNVTINGNLSQGMGDGGGTATMNGPVNVT
                     NDVTAGGKSVMTHTHGGVQPGSGNTGAPN"
     CDS             42698..43051
                     /codon_start=1
                     /product="putative bacteriophage protein"
                     /label=putative bacteriophage protein
                     /db_xref="SEED:fig|6666666.357184.peg.61"
                     /translation="MRYRRESADGDYTFGQGDDTWLVNSPEAVAQAVKTRFELWLGQWF
                     LDTAAGTPWIQSVLGKQRPDTYSLAIRQRILETQGVSSISEFNTTVNSATRRVSFTATI
                     ETIYGTTTVTSEA"
     CDS             43052..44251
                     /codon_start=1
                     /product="putative bacteriophage protein"
                     /label=putative bacteriophage protein
                     /db_xref="SEED:fig|6666666.357184.peg.62"
                     /translation="MALNLDTLGLSATVTAQGISAPDYQTILSTITDYFRQIYGTDAYL
                     EPDSKDGQMVALVALAIHDANTSAIAVYNSFSPTTALSDALTRNVKINGISRHAAVNST
                     VDVTLSGVQGTTITNGSVKDSNGVIWNLPASVSIGISGTVIVTATCATAGAVAAVANSV
                     NQINTPTRGWLSVTNPSAADVGTAAETDAALRVRQARSVAIASLTPFEAIDGAIAGIDG
                     VTRHKLYENDTGSVDVNGLPAHSISAIIEGGNVTQIAQTIRGKKGQGVATFGSTAVTVP
                     DTYGNNHVIRFSRPIDVPIFVSISMRVFTGYTTAVDEQMKRSIADYINSLDIGDDVLLS
                     RVYSPANLGVVSGGDARYYDIIELMLGRASGSVSPANVVTAYDESPICSADNISIAVVP
                     "
     CDS             44248..44919
                     /codon_start=1
                     /product="putative bacteriophage protein"
                     /label=putative bacteriophage protein
                     /db_xref="SEED:fig|6666666.357184.peg.63"
                     /translation="MSKYTELIPNYNATKPLFVQHVDLSTRPLIDVSSQMQAFVAAFDI
                     DNAVGDQLDVLGEWIGRSRTVMQPIVGVYFSFDTDNVGYDQGVWQRPFDPDSGFVDLSD
                     EAYRIVLRTKIAINSWDGQNDSLPAILDFATAGSGLSMQIIDNQDMTISVWVFPETSID
                     SVSREILAVIRQGYLTVKAAGVFSGEILYPSVGNQFFGFDIENEYIAGFDQGAWETSLN
                     G"
     CDS             44912..45583
                     /codon_start=1
                     /product="Probable tail fiber protein"
                     /label=Probable tail fiber protein
                     /db_xref="SEED:fig|6666666.357184.peg.64"
                     /translation="MANNEFKPFATAAGANVTSQSEWESLPALFSGFTSGKASSAQINK
                     AVRQASVIASVVAQFIADTNDADVLDNGNIVALEQSLLLALQKNAASNIPVASTTAAGI
                     VRLSNATSSDAETLAATPFAVRSVMQNADGRLAKNQNGADIPDKVAFAKNAQVPHLGSS
                     WIEFGGSAGAWTTSQFIDFLNSIGAFDHLYFVCAGTWSFSAKQKNHRYGVWACRTGGRG
                     C"
     CDS             45630..46172
                     /codon_start=1
                     /product="alternative bacteriophage tail fiber C-terminus"
                     /label=alternative bacteriophage tail fiber C-terminus
                     /db_xref="SEED:fig|6666666.357184.peg.65"
                     /translation="MSSSSDPLAIQGQFVYVESETPGSGEWRREFNTKNLTANDIGAVQ
                     ISEIVGMPQPWPLTTIPSGWLPCAGQSFDTSAYPILASRYPSGILPDLRGEFIRGWDNG
                     RGVDPARTNLSGQAFATESHTHASGSLEVGSGTPLYVGKGLQDGGGNLYSRTGVNNNAG
                     TETRPRNIAFNYIVRAA"
     CDS             46172..46783
                     /codon_start=1
                     /product="Tail fiber assembly protein"
                     /label=Tail fiber assembly protein
                     /db_xref="SEED:fig|6666666.357184.peg.66"
                     /translation="MKYSAQVKTTELNEKGLAVESGWVTVYQVNQVTREYLQANYEFLM
                     RGVGVSAGSYVDEPKMPAEGKALCRSADGKSWEHIPDYRGERVYNTETRLAHYVTQLGE
                     LPSDVTLLAPATEFDAWNGKKWVTDTAAQKVAVAKLAQQQLASRKTAAAARINELTYAA
                     NLDIATDAEKAALIEWQRYAVLLSRVDVNAAAIEWPEQPA"
     CDS             complement(46784..47005)
                     /codon_start=1
                     /product="hypothetical protein"
                     /label=hypothetical protein
                     /db_xref="SEED:fig|6666666.357184.peg.67"
                     /translation="MEIVNYNGTTICVLGDSDMLTDCPINSYAVIEDSGHYVAVRVGET
                     DAPAIHIDPVPTLEDALDIIAGRLSFFA"
     CDS             47478..47690
                     /codon_start=1
                     /product="Cold shock protein CspG"
                     /label=Cold shock protein CspG
                     /db_xref="SEED:fig|6666666.357184.peg.68"
                     /translation="MSNKMTGLVKWFDAGKGFGFITPDNGSKDVFVHFSAIQSNDFKTL
                     DEGQKVEFTIENGQKGPAAGNVVAL"
ORIGIN
        1 atgaagacac cgcaagctga aaaaagaccc catgcactaa gcacacatgg cgatacgcgt
       61 atcgacaatt attactggct gcgtgatgac cagcgtaccg atccacaggt gttggattat
      121 ctaaagcagg aaaacgccta cagtgaagct gtcatgtcac ctcatgacgc acgcaagcgg
      181 gcactgtatg acgaaatggt caaacgcatt ccgtcgacgg atatgtctgt gccgtatgtc
      241 agaaaaggct atcgctacca aagccgctat gagcagggga aagagtacgc catctatctg
      301 cgccagcctg agcaggcaac agacgtatgg gaaacgttgc tggatgggaa tcaacgtgct
      361 gaggggcatg aattttacag tctcggcacg cttgaggtta gccctgacaa cacgctgctg
      421 gcgctttcgg aggacttttt atcccgtcgg cagtacacgc ttcgttttcg cgatctaaac
      481 agcggcgagt ggttaccgga tgtgatcgaa aatgtgaccg caggagcgga atggtcggcg
      541 gattcgacgg ttctgtatta tgtgcgcaaa catgagcaaa cgctgttgcc atatcaggtc
      601 tatcgccacc gtctggggag cgatccggcg ttggatgagc tggtctatga agagaaagac
      661 gacacttatt acgttagcct gagtaaaacg acatcagagc actacatcac catttatctc
      721 agtagcacga cgacgagcga agtgttgttg cttgacgcga cgcgcccgga tgcgttgccg
      781 cagataggca ttccacgtcg aaaagatcat gaatatggca tcgatcacta tcaggataag
      841 ttttatctgc gctccaatcg ggaagggaaa aattttggcc tctaccgttc ggataggccc
      901 gatgagcaaa cgctggaaac gctgattgca ccacatgaac accgtgtact ggaaggtttt
      961 gagctgttcc gtgactggct ggtggttgaa gaacgtgagc gcggtttgac ccgcttgcgc
     1021 cagattcact ggcagacgca ggaagaaaaa gcgatcacct ttaatgatgc gagctatgtg
     1081 acgtggctat cgtacaaccc tacgccagaa acggcattga tgcggtatgg ctattcatca
     1141 atgacaacgc ccagcacgct gtatgaattg aatctggaca caggcgagca gcagttactt
     1201 aaacaagccg aagtgaaaga tttctcaccg gacaattacc ggagcgagcg cttgtggatc
     1261 acggttcggg atggcgtcga tgttcccgtt tccctcgttt atcatcgcga tcatttcagc
     1321 ccaggcaaga acccgatact ggtctacggc tatggtgctt atagccatag catggatccg
     1381 gattttagcg ttagccgtct gagtctgctg gacagagggt tcgtctttgc cttaacgcac
     1441 attcgcggtg gcggtgagct gggtcagcag tggtacgacg atggccgcct gctcaataaa
     1501 atgcattcct tcactgactt catcgatgtg tctcaggcat tgatagaaaa aggttatggc
     1561 gacaggaaca acatgtttgc tatggggggc agtgcgggcg ggctattgat gggcgcagta
     1621 gtgaacatgg ctcccgatct attcaagggc gttgttgctc aggttccctt cgttgatgtg
     1681 ctgacgacaa tgctggatga gtctatccca ttaacgaccg gcgagtatga cgagtggggc
     1741 gatccgaatg aacaaatcta ttatgactac atcaagcaat atagccccta tgacggtatt
     1801 accgcgcaac gctatccgca tttgctggtg acgaccgggt tacacgactc tcaggttcag
     1861 tattgggaac ctgcaaagtg ggtggcgaaa ttacgtgaag ttaaaacgga cgatcgtctg
     1921 gtgctgctat acaccgatat ggatgccggg cacggcggaa aatccggtcg ttttaaacgt
     1981 tacgatgata ttgcgttgga atatgctttt ctgctgatgg tgcttgaaat ggttgaggaa
     2041 gcgcacgaat aacgcgttgg ttatgagggt aaacccgttt tcgggtttac ccgatcggca
     2101 tggcacatta cttaggtcat atcacgactc aggtaatatc agcctgcggt ttctttgccc
     2161 ttttatcggc ccgtttttca gcggccgttt tcaggggctt cttcttactg ttctttttgc
     2221 tatccagacc tttactcata tcttgcctcg cgtgataaaa gggtaggttg ccactccatt
     2281 aacctcttgt gcgggccgat atgcaagcag aaaatcgttt ttgctgtgta agaatgtaac
     2341 ccgtggaaag ggatgttttc cacggcaagg tcgtcgtagg ttggaatgaa aggataagcc
     2401 tacttagact tcggttcgta gggtaagcga gagaactgta gtgagcgctg gcgataaaac
     2461 atcacgcgtt cgcgaaaata gtcacgcaag tactcgggtt gctctctctc aacgacctcg
     2521 ggaatgaccg gcatattgta acgttctttg aaggccacgc ctgatgccgc caagtctacg
     2581 ttaactttat ccatctcttc tttggacaat tctgccagat tgtatcccat accgttttct
     2641 cctgcctatt ggccacagac tgatgcgtgc cacggtaaag tagtgacagg aaaatggcaa
     2701 gcgttcacct tatcatgtgg atgtttatta ttctcattac gaaatgggaa tcatttttaa
     2761 tacaaatgta ccatacataa tatcgctcgt agttgttatt tttgataata aaaatgattc
     2821 gcaataatat attttctcta agacttaagt gataataaat atcaataaca tgaattttaa
     2881 cttgttgttt gtatggtgtt ttttgtttat tgaatatcaa tgttaataaa gtgtttttta
     2941 ttttattttt tctaggcata atgccctgaa taatttcacc tgccgggaaa atagggagtt
     3001 aacatgttaa aaaaagaaat gattcagaag ctgaatgagc aacttaatct ggagttttat
     3061 tccgcgaatt tgtatctgca aatgagcgca tggtgcggtg acaaaggttt tgaaggcgca
     3121 tccagtttcc tgaagacgca ttctcaggaa gaaatgcagc acatgcagcg cctgtttgac
     3181 tatctggacg acacaggaag cctgcctgta ttaggcgcga ttgctgcacc gccgattgat
     3241 tttgattcac tggctgatgt cttcaagctg acctatgaac acgaacagct gatcaccgca
     3301 aaaattaatg agctggcgca tgaggcgatg gcgctgcagg attactctac attcaacttc
     3361 ctgcaatggt acgttgcaga gcagcacgaa gaagagaaat tgttccgttc tattctggac
     3421 aaattggcgt tagtcaaagc cagcgaaggc ggcctgttct tcatcgatca ggacctgaaa
     3481 aaaatgtctg cggcggcccc gtcaacctaa tgacaagcgg cgcttctgtc ggccaatgag
     3541 tcgttgaatg atgcgggata atgttctcct tatcccgcca ttttcccctc ccgacccccc
     3601 tttctaccag taccaaacta ccgatattat tcctgaacac cacactcgac ttcaccttcc
     3661 tctgtcgcta tgatcggatc agtcgtgata tacaacattc tgttttataa gggttgaggc
     3721 tgtctttctc tgattcggat aaggctgcaa aactcacaca catcattgtt tgaatacgcc
     3781 atgtcgggaa taccatgatg aagaaatttt tgctatctat cgtgcttact tcactttctg
     3841 tgaatgcctt tgctgccgct aaactggcaa atataagccg gtttgaatac ggcgatcgct
     3901 gggctttcac gcgtgaagaa gttcaactga tttgccgccc cggcaatgcg ctgtacgcct
     3961 tacataccgg gacgctgatg caatatccgc taaacgatgt tgccattgcg caaatgaaag
     4021 ccgggcaggt gagtgcgcag ccgatagacg cgatctggct ggacgaccct aagcatcccg
     4081 gacagaaaaa aagccttcag ccatttattg aacgtgcaga gcagttgtgt aagccagacg
     4141 ctaaaccatg aagtgattga tttacctatt gatgttaaat aattacttct ttatggttaa
     4201 gataaagtgt gaaatctgtt ccatttgtga tgattgcgaa taggttaaag ctggaaaacg
     4261 cgaggtagtt ggctaagctt aagtctacag ggctagtaca gcttgtataa atgccaactt
     4321 ttagcgcacg gctctcccaa gagccatttc cctagaccga atacaggaat cgtattcggt
     4381 ctttttttta ctcattgttt ttaaaaggtt tatttttaat aaccacgaaa atacacgaaa
     4441 aatacacgaa attcgataca cggtctttta taaatagacg taatctttcc ctcgcgtatc
     4501 cagatatttc tctgtcatct ttgctgattt atgccccaat aacttctgag caaattcctt
     4561 tcctcgttcc ttctcataca atctgccagc cagacttctt atttcatgaa acgtcggcgg
     4621 cttctcatcc aattcaatcc ccgatgcctt tcttgcttta acaaacccct ttgttagccc
     4681 gttgagttcc acagccccgt tagggttatt ttttctaata ccaacactaa tcatgtaatc
     4741 cgttttgctg gaattacggc attgctcaat gacatcgcat aaacgtagcc ctatggcatc
     4801 gattgtcagg tcgagaggga tcgccagttt gtttccggtt ttcccctgtt cgacgagtaa
     4861 ccggtcatca acaatatcgc taaatttaat tgcagcaaca tcctcccggc gctgaccagt
     4921 aacgagcgct aaatccatcg ccaactgaaa ccactgcgcc tgtttttcag cagcgatgcg
     4981 aatggcttta tattgttcaa gctccagcct ctctcgcttt acgttcggct ggggcgttcg
     5041 cgtgggcaac actgggttat tatcgatgtg accttcaaca atggcctcgc ggaaaatatc
     5101 agagagaaca gatcgaaaac ctgcggccat agatagcttt tcttgctgta aataaatttc
     5161 caaaaattca gcaatgtctt tcgtggttat ttcctttagt attttccctc ccagcgactg
     5221 ctgaattgta gcgagttggc cagagcgtgt tttgtaggta ttagcggcca aatctcggcg
     5281 ctgaataatc acatcgtaac gctcaagcca ttcggccatc gtgagttctt ttttcacctt
     5341 cagcttttca atgagggcga caggagaaaa actttgttca atgaagctgt ttgcctctat
     5401 agcctggcta accgcatccc tgcgcgcgat ctgcccgagg ggtatttcct ttcctgttag
     5461 tgggtttcgc caataaaatg atttatattt tttccggtaa gtgaggttac gcggcaagtt
     5521 agcgtcatac cttgtcgtcc ttgccattga tgattctcct cactaaatct gaattgaagc
     5581 cttttctttc ggcaattatc cgacgtgaca gcttgtaatc ttttgggttg ataaatacag
     5641 catcttcgct aactcgatat tcacgaccat gcttttctgg tgctgggtaa attttcccag
     5701 ctcgcgccca gcgttgtagc gtctgtattg tcggcaggct gtcttttgaa taatggcgtt
     5761 cgcaccattc attcagcgtg atgagctttc ccatattcgc ctcataacgt tatgtattta
     5821 gatttcacgg aatcagtttt agcggggagg acgaacctcc ccagactatt tagctattga
     5881 tatactcggg cttcatatcg cacagcgtta cagcgaactg atcatgcagt tcgtcgccga
     5941 ggtgacgctt tgctgcagct agtgattttt ccagcgctgc aaacttctcc accgcgtcgg
     6001 gttcgtcagg ctggggtagg gaattaatct ccgcctcaat ctggtttttt gcattaacct
     6061 ggtaatagcg cttcaccgct ttgtttttca gttcggtgaa taacgcagtg ccgagaactg
     6121 attttttagt ttcaatgtca gcgcgaatgg ccgtagccct atcaacgtca tcagcctttg
     6181 ctatctgatc gcggaaatca tctgccagcg cgtcgatatt gctggtggac tcctgcgcag
     6241 tggctgcggt ttccggcgcg tcagtgggta ggtcgctgag gttgacacgc tgcggtaccg
     6301 ggttgatttc cttctctgtg cgatgctcta tttcatcagg gctatacacc cccatgatca
     6361 cctctgggca atacaggcgc gcccagtatt taacggcaag atacgctatc tgctgcttag
     6421 gtgccgtctt ccagagcggg gaattgcgcg ttgtaatatc agccagataa accggctcac
     6481 cccatgtgat ttcttgctca ccgcgtaaaa tagcgccgac acggataaac aatcctgact
     6541 catcgcgccc gtccttttta ccgacgatct tttcccaatc cccaccatac tcgtacttga
     6601 atcggccacg tactgcgctg gaactggtaa caactgcgtt aaccaactga gcctcgtagc
     6661 ccagctgacc gtttactaaa tgcgtttttt gccccacaac atacgggtcc atgccccaac
     6721 gtgcagcttg catgacgatt gccagacagt cagacgattt tccttgcagg tgcttgggaa
     6781 ctgtcgcgac gccttttgac atgatgtcgg cgatattcat tatctgttcc atgatgtcag
     6841 ctctcattaa gagaacgcta ttgttcatca cgttaggagc ttgctgttcg gttgttacga
     6901 tgcttgtgtt ttccatgatc tcccccttat gccatgcgca gcgcttcaag gcggcgctgg
     6961 tcaaaatcgt tcagttcgtc ggcgtaatct tcaattattg gagctggcca cacgccagta
     7021 tcaaaacccg tagcaatagc gcgcatagct tttcgatact ccagcatgcc caattccagc
     7081 aactcttccg atgcttctac gatggcgatc cagtggtagt tctcgtcttt gttgacgaaa
     7141 atccagaaga actggtcaag tgctgctgtc tcgcagtaca tggctgcgct caggtggtag
     7201 tcacggtcaa tgatctcccg atgcaatttg gcgcgaagac catcttgctt aacgttccac
     7261 atgctgattg ttttcagatc gcaaccgatg cgcacaccgt caaggtcaat ttccagatca
     7321 gggcgcacac ggacttccag cccagtttcg tcgtcaaatc cgaaataact cacttcaacg
     7381 gcgcggctcg gatgtgtcag cagcttccca gcggtcgggt gattcagtag cgctttctga
     7441 atggcttgag ctgtcgccaa ctgcccgcgg gtgaccagta ttttgtcttc tggattctcg
     7501 cgccatgcat cgagcagttc gtcagcgaat accgcatatg gattaaccga tttaacagac
     7561 tgaatcagat cggacttggt accggaaact ttcagttgtg ctggcttctg tacctcctgc
     7621 gcgaccaggt cgggattaat aaccgccagt tgctccagca gcgcgtcgcg gctcccgctg
     7681 gttttaacct gcggcggcag ggtggcgttg tactcgtcca gtaagacttt gatatcatca
     7741 gcagaaagcg gcgctggtag gctggcgtta tgctcatcga taaacgcgcg gatcgtcgct
     7801 gtagtggtga atgcaccttt cgggatctcc ggttcgatgc tgaattcagc cagcaaattt
     7861 tccggttgca gcgccagcgc atgcacaagg ttccccatat ccagcacttt tgagttctca
     7921 cgcgcgatag tcttggctac gtggcgagcg ttgaagtaca tcagcgacac gcgagcatcc
     7981 ttaacttgag tgctgctgac gccgttcgcc gcgtggtaat cgctattcgg cacgccttcg
     8041 tagcgaccag gttcaaaata tggcggctcg tccgtggctg ctggctctac tggttccgca
     8101 gcggcagcac cttcgccaat ccatttattt acagttgatt cgagagctgc ctgcgcttct
     8161 tcaatagagc catcatcatt cgctggcgtc gataacgctg aatcagcttc gctcgattgg
     8221 ttgccagccg tttccatctg cacattgtcc accccatcat tttccggttt ttctccctca
     8281 tttgagggga tttcactgct ggattgattt acgtcatgta gcgtcttcgt tgcggcttgc
     8341 tggcgcgcga tatcaacgat ggatagcggc tgtgtttgtt tgaggggctg actttcattc
     8401 accaaaccgt caacagagaa catgcctttg cccacgtttt tgatttctgg ctgggactcg
     8461 gtattggttg gccctgatag tgcctcctct gcacccgccc aaaccttttc gacgttttct
     8521 ggtgtagcag gatcggtagg tgtgtgccga gccagcgcta acaattctgg tgtcggcgtc
     8581 gtgtaatact cagcagtcaa tgttgaatta atatatcgct ggagactgtc agggaaatga
     8641 gtgacatctt gattggcttt gcgaattaga gcgcctatcc ctgctttaaa tacgctcaaa
     8701 atacccgaca ttgatcgcag cgccaggctc catgttttaa atggctgctc tttgtttgcg
     8761 acaatctctt tagctcggcg ataaacaggg ccgggaatat tgtagatatc gaaatcaaat
     8821 ggtgtcgtga acagcgcaat ttcgatatca agagtgtcca gagtgtgcgt gtatccgcga
     8881 tcagtattgc taccatcacc agcaatagcg ccagactcag tgcgctgcac accggacttt
     8941 ttcgcccact tcgttgtaac ttctgaacga tacggccctg aacgctcgag cgtagaacct
     9001 tcgttacgtg cgttcagcca ttctttcgag aatgaaacga tgtcgccaac ggatggagct
     9061 ttgccgtccg gtacccatac tgatttaatc gcatcaagca ggttgaaaag agtctcagga
     9121 aaaacgtgtt gttcctgcaa caactcttta gcgttattca gcgccagcag caggttctga
     9181 acataggtcg cgtccatgtc gtgttgcagc gtagaaattt cgccctgctg gccagtaaac
     9241 aatttagtga acgagccgaa caaccaggcg cccagcactt tctgaacgaa tgatgcttga
     9301 tcgatagtga ttgtgccgtc agttgctgcg gtatcagcta attgagtcga tgcggtttgt
     9361 gcagagaaag acgcatggtc attattaatg ctgattgatg ctgattcata cttagtaatt
     9421 tgacgccacg atttaccatc atcattcagt tcatagcgat cgcaccatgt gtcattcaga
     9481 gtgccttcct cagggagatc gtcaacgacg aaccagtcag tacgaagcgg caagttataa
     9541 tcaccaccgc ggccggtcgc gatctcttcg tcttcaagaa tgttcatgat ttcacgctct
     9601 gcgcgtgagt cggatttagc agagagccag cagaagaggc ttttcttttc tgatttggct
     9661 tttgctttga ttagaaacgc atacgtattc attgcgttgg gactccttga ggttgtagaa
     9721 tcccctgagc cattgattgc gccctgaggg tagtggtcat tggtcaaaac tcgattccgg
     9781 taagctttgg tcggcgaacc ggcgtactaa cccgcctcgg cgggtttttg cgtttcaagc
     9841 tgcgagcagc ttttccctgg tgccagcaat ccgctagcta atggttattg gtcaaaactc
     9901 gattactttg ttgcaggccg ttggtcgtca gccctgataa ttccctcaac tggccagcat
     9961 tcgccgttaa ctcgctggtc gtacatgtca gcgacacaat cctgcttcgt gtcgtaaaca
    10021 cccaacacag cttcgtgaca ttcgccagtc gtcgtgcaga tgacgagaac cagcgcgaat
    10081 agtgtttcca tcaatttcct cttcctgttg cccttgccat gatgcgattt gctgcatccc
    10141 attttttact gctgcgctgc cgcaatgctt tacctgctag ccgctgcgct ctgcgtaact
    10201 gctgctgatt aatcatgctt tcacccatga aacacggcga caatcgcgat tatcattccc
    10261 gccataatca ccttgccgtt atcgcccggc tggcggaacg ttgttgaaac ctgctgcgct
    10321 attacttaaa tctcagcaac tgccgtctgt tcttacgcct cggctggcta cttagccctt
    10381 ccgcattact gagtaactcg tggtattgct cagcgggtta tgcgttagag cgttgctgcg
    10441 tttcgatggg gtgattaagc catagactta aaatcaagtc aagtcttggg cttatttttg
    10501 gtgtaagttt ttggcttact ctcttggggg tgaatcatgg taggggtgat gcggcgtgaa
    10561 tttcaggcaa taaaaaaccc caccgaagtg gggttccctg cctcatcaaa cgattggcgg
    10621 tcatatgata aagcaatcag cgtagtacgc cgatcttagc gatttttagc ttaaatgtac
    10681 ggcgttgctt tttcaagcac tcatgtaaat ataaccagtt tgagtggggg tgttaacgtg
    10741 tgagataatg aaattgctaa gatgcaacat gttcttatgg ctatataaat ctgtttatgg
    10801 tcaaactctt aaatgagtgg taattggtca gaactcgaac gccttaaaca ggtggtgtcc
    10861 gtttcgtctt tggttggcct tttggtcggc gagcggactt tttgtgctgg ttatgcatca
    10921 aactcagttt tataaatcct attcagtagg ttggcactta ctggagccca gtcttagggc
    10981 atggtgcgcc gatcttagcg ataggtacgt atcgctgata ggtaactcaa gggctaggcg
    11041 tatgcgacca cgcccactct tcgaaagggt gtgcaaacga atgagcaatc tgatttccgc
    11101 tattcttgtg gttttcgagt tcattgtcgc attactgcga ttgatcggat tatttacaca
    11161 gtaatctgaa acgtaaaaaa ggccggaaag gttacccctt ccggccttta atatttttat
    11221 ttgctaatcc tttgctggct tatacctgcc cctgaggtac ttctctacat actcatccag
    11281 ttctttaagg cggagctgga atagatcgat cattcgttcg cgttctgcct ctggcagttg
    11341 gcgataaaga ttgagcatct tcatttcatc actgctcagc cctgttgatt cctcaacatc
    11401 ttcgccaagt aaccaagcaa cagaaacatc cgcagcctca gcaatagcaa ttgccgattt
    11461 tttactgatc actccttttt taaaccatcc attaacagac tgtggagtga cacccgcccg
    11521 cctggccatc tcagcctttg agataccacg ttgcgttagc tcggtcagtc gttcgacaag
    11581 ggcactttca tctttttctt tcattacaga atgataaacc tttggcttat taaaataaat
    11641 tagcctttgg cttgactaat gtataagtct ttggcttaat ctatttcaca tccaaactgg
    11701 agaaaaagat gaacggatta accaaagcaa ttgagcgggc tggtaccgca tcaaacttgg
    11761 ctgcaaagct gggtattaaa cctatgtcgg tcagccgatg gaaaactcgc tacaaaggag
    11821 tagttccagc tgatcgcgtc ctcgccattt acaacgcaac cggcgtaaca cctcacgaac
    11881 tacgccccga tctttaccca aacccaacag acggcttacc aacggaacgg aaataaccat
    11941 gcacacccaa acttatcagg atgataacta cgccaaaacg ggattgctga aatccagaaa
    12001 tcaatctcgt cagtctgtat ctgctcacgc tgctgttcgt gacgctgtgg atgcgtggca
    12061 aaaaacgttg ccgggaaggg cgcaggaggc gatcgcgcag ctggtggtcg atgaatggcg
    12121 ccgtcgtggt gggcgtggtt tgcagttagg cgactcggca cgaaacaacc gccagaacat
    12181 tttccgctgg ctggataacc cgtttaactc caaacgctac acggggtaca tcgagcaact
    12241 gactccgatt atcgctgatg tgatgccgat tgagattgcg cgccggtacg ggttgaaaaa
    12301 gggaaagaca aaagcggagc tggtggccac tgcgtcgcgc gaatgctcag aagcaaagca
    12361 gtccgcgctg ctaggtgaac cactgaggga acttgagcaa aagataaggg aaggggttat
    12421 gtcgctgatt cagctggcgc cgcctgaccg ttgggcagca gttctggaca gtaccgtgac
    12481 gatgttcaac gggattttct aatcgagttt tgaccaatga accacttgga gtttatcgaa
    12541 aaacatgttc gtgaggattt gctgaaaaag ggctacacac ccggcatcgc tcgagggggg
    12601 gggtaaccaa ggcgctggag tattaccgcc gcgtctctca ggcaagcagt aaaggccgaa
    12661 tgattgacga ctgtctgcga gaaggtcggt tgtgggctga gaagtacagc actaagcagc
    12721 cgaaatcacg aacaacgaag taacgagttt tgaccaataa cttactaagg agcccagcga
    12781 tgaaagagcg cgggataatt tttaacggcg acatggttcg ggcaattatt gacggtctca
    12841 aaacgcagac gcggcgggtt atgaagccac agcctactcc gtgcgattac atagatgagc
    12901 acggaaaccc tcgcggcggc catcagtggc ccagcaatat ttttcggaca atgctccatg
    12961 tcgaaaggga gctacagaac ggccaagggg ggtggaaggg gctggtaggt gatgcatgtc
    13021 catatggcga tgttggcgat cgaatctggg tgcgggagac atggatgccc gatgcacctc
    13081 gggacggtac ctggccagat gtagagttct acggatgcaa aggtgcgcca ctcagcatga
    13141 ttcccgaccg cttccgccga ccagagcatt gtattcatcg tgcgtcatgg acaggcagcg
    13201 agatggttgg ttggacgcca tcaatccaca tgccgcgatg ggccagcaga attctgctgg
    13261 aaatcacaga tgtgcgcgtg gagcgcctga acgatatcag tgaagaggat tgctgggcag
    13321 aaggcattga tgcggttgat ggttgctttg agaacgccga gatcattgat atggcgagaa
    13381 agatagggtg ttgcattgat gatgcgaaac ctatgttttc gttgctgtgg caatccatct
    13441 acggggctga aagttggagt gaaaacccat gggtatgggc tgtcagcttt aagcgtatcg
    13501 agggggaata atggcccgta tacgcacaat aaaaccggaa ttctggacgg atgaagacat
    13561 ggccgaggcg tccgaatgtg cgtgcttgct ggcgattggc ttgctgaatt atgcagacga
    13621 tgaaggctat ttcaatgcca acccgaagct aattaaagcg gctgtttttc cgctacgtga
    13681 accatccatt cctattaccg taatgctaca ggagctttcc aaccatggat atctatccat
    13741 gttttccacc ccggatgaca agagttttgg gctaatcaga aactttaaaa aacatcaggt
    13801 cgttaacaag ggaaaagaaa gcaaaatcaa agagatggag ttgataccgt ataagtacgg
    13861 tacatctact gtatcagtac ctgtaggaat ggatcaggga tcagggaatg gaaaggaaga
    13921 aaccccacac ataccgcgcg aggaaaattt acctccagtt gaaaacaacg gactgccgga
    13981 atacatacca ggcatcgatg aaccgatcgg taaattcccg atgttttccg gctggagacc
    14041 gtcgttagat tttcgacaac gggctgcgct ggcgggggtg gttttgacag aggactacca
    14101 gccaactgag ttagcgggtt ttgtcatgta ctggcaaccg gagggtaaag cgttccacca
    14161 gcttcaatgg gatcagaaat ttgctcggca catccagcag gtgcggagcg gagcaggtaa
    14221 acaaaaaact ggaggtaatc atgcagaaaa atcaaacgct ggcgaatctc aaaccgtcag
    14281 ggaaatccgc gcagcccgtg cagcatggga gcgagagcag cagggtgtgg actctgtggg
    14341 aaaccatggg ggcaatatat tcgaatcggt ggacgagcaa gaacgggctg acgccaacga
    14401 gtctctggat ggcgcaagtt ggcgcgttga gtgatcaaga tctggcgaag atatgcagcc
    14461 tgtgcgccga acgctgcgcc tctgggaata cgtggccgcc cgaccttgcc gagttcatgt
    14521 cgttagctgc cgaatgcgga gctaacccgt ttgggctcaa catcgccggc gtgatggcgg
    14581 aatacaaacg ctggcgcaac gagtcgtatc gctattcgag cagcactgaa ttcccgtggc
    14641 gccagccagt gctgtatcac atttgcatcg aaatgcgtcg ggcgggcgtt gagaaacgca
    14701 tgactgcggg agagttggag cggctggcag aacgactgct gaacaagtgg gttaagcacg
    14761 tagcacacgg aatgagtatt ccacccgttc gccgacaact agcagcacca aagcatccag
    14821 gtgggccaac acctgcacag caaatgcacg aagaatatct gcgccgcaaa gcggccggac
    14881 tgatttaacc aacaatcgag atttgaccaa tgaaaactaa aatgcccgtt tcgcagcgca
    14941 tgctacgcca cattcgccgc catgagggga tgacccgaca ggaaatcgct cgcgcactca
    15001 acatcacatc gaaagaagcc ggttcaacgc taaatacgct gagagaaaat cagcgaatag
    15061 tggcagttgg tatgccaggg aaatacacgt atttcctatt ccgtgaaacc caacccgctt
    15121 tcggcgttca tcccgcgcaa gctcggttca ctcaactgct gtcaggagta cgcgcatgaa
    15181 acctgaaatt tctacagccg taatgattga gcgcgttcgt gaaatggcgg cggatagctc
    15241 ggatagtcag gatcgcgtgt tatttactca agctgcgaac cgcatcgagc tgctgctagc
    15301 ggctgaatct ggcatgtcac gcgaaatggc ctgcattcgt catgcgctgg atattccgcc
    15361 cgatcaatcc gttcagtctg gcgtcgttga cgcgttcgtg cgtctgaatg cgaaaatcca
    15421 agacctgagc ggacaactga gcaagcctgg caatgcccgt tggtgtccgt ccgttgatcc
    15481 aatatctgga agcaagctgt ttctttggct ggaacacccg acacttggtt gtgttccgac
    15541 gtatggcggc ccgtacgata gtttcacgct aactgagcgg gatgaaaacg gcgatttctt
    15601 ccgccatcgt tatgaccatg acgaaggggc gtgggtagat gacgaagccg tttatctgga
    15661 agagcaggaa gggaggcagg gccaggctta cacggtgcca gatgaacgtg cagcctatga
    15721 ggcgtttatc gctaagcgtc tgggtgacag catcgacact caacgcgcca agaatggtga
    15781 cccagaaaaa ccggattaca tggcatggga tatgaccgtg ggctggattg cgtggcaagg
    15841 ccgcgccgct atgccccagc cgtccagtaa ttctacggtg agcagcgcgc tggttgctga
    15901 gaatttggcg ctgaaagaaa tcatcgatcg cgttactgac cttgataacg aacctcagta
    15961 tcacgagtcc ggcatgggat gcggactgga agaccgaaat atcactgacc gttacgaagc
    16021 tatgcggcac ggctgggatg cggcaatgga gcgagtttac ggcgaagtca tcccgtgcgc
    16081 ggaagagtta agttttccgg ctaccgaaca agcggcgcgg gaactaatgg cgaaaggggt
    16141 tgatcaggcg gcatcaggat ttcatgaaaa ggcgttcgtg gcatttgata gcagtaacta
    16201 tcctggcctc tatatccgcg ctcagttgca gttattagcc cagcaattac gggatggtga
    16261 cgcatgagca aaataaaaac aatgggtgcc agctcaataa ctggaaccgt atattacgga
    16321 acgttgaatg ctagtaaaaa aatgtgggtt ggtccgaaaa tagatgtcac tgacatggca
    16381 tatcgcgctg tagctgaaag cctcatgtat aaaaaacaag acatcatttt cacgctgaat
    16441 gatgggcgag agttggtgtt gagcgcaagc gtccgtgatg catccgcaaa gccagagcag
    16501 aaggacggtg acgcatgact gacgccacga ttttagatat gtgctgtggt agccgcatgt
    16561 tctggcatga caaaagcgat ccgcgcgcgg tgtttatgga taaccggaac gaacagcaca
    16621 cgctgtgcga tggccgcagc ctggttattt cgccggacat catcgccgat ttccgccagc
    16681 tcccgttcgc tggcgagtct ttccctgtcg ttgtattcga tcccccgcat ctggagcgtg
    16741 cggggccaga gggctggatg cggaaaaaat acggcgtgct taatccgcaa acgtggcgtg
    16801 atgatttgtg tgctggattt agcgaggcgt ttcgcgttct tcgacctgct ggcgtgctga
    16861 tcttcaaatg gaacgaaacg cagatacctg tcagtgaaat attacttcta accgaagaaa
    16921 agccaattat cacccagcga acagggaaag gggataaaac tcactggatg atttttatca
    16981 aatctggacg gattcaggat aatccagagt ctcttttgaa ttacgccacc agccggataa
    17041 tcgaattgga agcgatgctg ctggtggatg cccctgaaac tgtgtggcca gcagaagtgg
    17101 aaatggtcta ttcacagatt gaaagcgccg gagggttacc ggcgcaccac cagcgccgct
    17161 tacaccatca catcaaccgc atgtggctgg aaaaaattcc ggtaccggaa atcatcaaag
    17221 ctgcccgttc gcttgcaaat gccatggaga attacgcgtg agagaaatca ttgttgataa
    17281 ttttgctggc ggcggcggtg cgtctactgg gattgaaatg gcgatcggtc gcagtgttga
    17341 tattgcgatt aatcacgatc ctaacgcaat tgcgatgcac acgacgaatc atcctgacac
    17401 gttgcactat tgcgaatcgg tgtttgatat cgacccagtg acggcgactg ctggccgtcc
    17461 tgttgggctt gcgtggtttt cgcccgactg tcggcatttt tcaaaagcca agggctctaa
    17521 gccggtaaaa aaagaaattc gcggtttggc gtggatagta ttgcgctggg cgctggcagt
    17581 tcgcccacgc gtgatgatgc tggaaaacgt ggaggagttc aaaacgtggg gaccactgct
    17641 gactaacggc gatggcactc agcagcccga tcctgcgcgt gcgggagaaa cgtttgaagc
    17701 gttttgtgga atgttatctg gtggcgtacc tgctgatcac cctgcgttag ccgaagcatg
    17761 cgaatttctg gagattgaac caggcagcga acatggcaaa caacttattc gcgggctggg
    17821 gtacagcgtc gattatcgcg aattacgtgc ctgcgactac ggcgcaccga ccatcagaaa
    17881 gcgttttttc atggtgatgc gttgcgatgg ccagcaagtt acatggccgg aggctacgca
    17941 cggtgacccg aaatcaccag cggttcaggc tggcaaactg aaaccatggc gcacggcggc
    18001 ggaatgtatc gattggtcaa tcccgtgccc atcgattttc gagcgtaaaa agcctttggc
    18061 cgaaaatacg ctgcgacgca ttgcgcgggg tttagagcgg ttcgttatca ataatccgca
    18121 gccgtttatc gtgaaatgca accacacatc aacgaaaacc cgctatgact gcttccgtgg
    18181 tcagtcgctc aatgagccat tgcagacgat cacccgcacg catggttttg ctgttgtaac
    18241 tccgcacctg acaaaattcc gtaccggagc tgtcgggcag gaggttacgg aacccatgcc
    18301 gacaatcaca gccggttcat cgattcgtcc aggtggcaat ggtcatgcat taggaatggt
    18361 agaggcgatg ttagagccat tcatcatcgg cgctggtggc ccgaagtatt ctgcaaagcc
    18421 aaaatcggta gaacagccga tgaatacgct gtgcaatacg aatcactctg cgctgataac
    18481 gccgtacatt gcacgaattg ggcagacggg atttggtggt aaccggatgg cctacgatgc
    18541 aaaagatcca ctgacgactg tcgtaggtaa agcagaacac ctgctggtgg ctccggttgt
    18601 tgcgcgtcag ttcggtaaca gtgtaggtca cggcacagac gagccaagcg gcacaataac
    18661 cgctggtgga ggtggcaaaa gccagcttgt gtcggcattt ctggctaaac acttcggcgg
    18721 caattacacg gggccgggcg caaatctgga tgaaccggcg cacacggtaa cgacagttga
    18781 tcaccacgcg ctcgtaacct cgaatcttat caagatgcgt ggcacgaaca caggccagcg
    18841 cactgatgca cccctgcaaa ccgttaccgc aggcggcaac catttcggcg aggtgcgagc
    18901 tttcttgttg aagtattacg gtaatgagaa agaaggcgtc agcctgaatg atccgttgca
    18961 cacggtcacg acgaatgacc gtttcggatt agtgacggtt gaaggcgtag attatcagat
    19021 cgttgatatt gggatgcgca tgctgcaacc acatgagcta tacgcagcgc agggcttccc
    19081 tgattggtac atcatcgatc aggattttag gggcgtgaaa tacgcaaaag ataaacaggt
    19141 ggcgcgctgt ggtaacgccg ttccccctcc gtttgccgag gcactggtca gggctaatct
    19201 tcctgatatg tgcgttaaaa aacaacaggc tgcataaatt acagggctct taggagcctt
    19261 ttttgttgca aatggaaata ttttatatag tatctttact gtatggatgt acagtaattt
    19321 taaggtgaaa ccgtggcagc aaaattaccg gccgcaggct acgcagttgt ccgttgtagc
    19381 gacgatgttg tcgttgcaac atttcatgat tttccagaat ttgaccgtgc attgacgtac
    19441 cggcagggcg acacaatctc atttatgcca ctcaaaccta acgaaattgt cggaacccca
    19501 acgctcttca cacaaatgtt agaacgtgcc ggatatcgag taagccaagt ttaaaataac
    19561 tatatataat tcccactgat ggcctgaaca accatcaact gctgcgccaa cggagagaac
    19621 caatggcgca aaaaaacgta tcaaatcccc agtcactgac gtttaacgac gccagcgact
    19681 ttctgtattc agcggtcacc ttgcgaggtg ccgcatgaaa cagcaattcc atctggcaaa
    19741 tgatgccgtc aagcaaaacg ctattaattt tattcggcag ttacccgtta acgaaaagct
    19801 ccccctcgtc gtggatatca aggagcccag ccgcacgaag gcccagaaca ataaaatgtg
    19861 gccactttta gaagaccttt ccgagcaagt tgtctggttc ggtagcaaat acgataagga
    19921 ggattggaaa gatctgatca ctgcaatgat tgccaaatcc aagaagcaag aacagcgcat
    19981 ggctcccggc ctagatggcg gcattgtgat gttcggtcag cgcaccagca aaatgaacat
    20041 cccgcagatg gtggaagtta ttgaagccat ttattggttt ggtactcagc agcacgttaa
    20101 tttcagtgaa aaatccaagc tggaaataga gtgggctaaa cgttggggtg atcggaatgg
    20161 ctaaattacc ccgccgtaaa tgtgcacacg tgcaatgccg tgagtggttc catccgtcac
    20221 gcaatggtca gatcgtgtgt tcgtatgaat gcgcggctgc tcacggaaaa attcaagcgg
    20281 ataaagctcg tcaacgcacc cagcagcagg cggagcggaa gcgcaaggaa gaagctaaag
    20341 aggggcgcaa acagcttaaa gcccgaaagc tggctctgaa aacgcgtaac gactggaaac
    20401 gcgaggctca aaacgctttt aaccgctacg ttcgtctacg tgatgaagga aagccctgca
    20461 tcagttgtgg ttcagctccg gcgcaaaaac tcggcggaac gatggattgc ggtcattacc
    20521 tgactcgtgg cgcgcgcccg tggttggcat tcaacctgca caatacggct tgccagtgcg
    20581 ttcgctgtaa tcgcgaccgc gcaggagcac aaaaggaatt tgaggatgga ctggttgagc
    20641 gcattgggtt ggaaaaagtc gaagcattga actgcgataa cacccctcga aaattcacca
    20701 tcgaatattt ccagcgcatt aaatccattt ttacccgtaa agccagagcg ctgcaaaatc
    20761 gccgctctca ccaccaggag atcgccgcat gaaatgcaaa gtagaaggct gtgaacgtga
    20821 atgcacgcat tacccaagaa aaggcatttg ccagatgcat tactttcgca tgatgcgata
    20881 tggaacctat gagctcacca gatctggaaa aaggaaagat agatcgcata acgcgaaagg
    20941 atatcaaatg cttcacttgc caaatcatcc cttggcaatg gcgaacggaa cggtttatga
    21001 gcataggaag gttgtttatg acaaatacgg agatgacctc cctccgtgtg aaaaatgcgg
    21061 aaagcacatt gattggaaaa cagctcacat cgaccataag gatgaggttg ttgataacaa
    21121 caagccagaa aatctaagag ttctttgtcg ggcgtgtaat gtcatgagag caagggttta
    21181 cattcccgaa catacaaaga aggggcgatc tgcaattact tatgaaggtg ttactaaaac
    21241 tgcgagcgag tgggctagag atccgcgcgt aaatgtctct gcctgcacta tacaggttcg
    21301 gataaagcgg gggatgagca ttgaagatgc tctgttttca ccaaagacta cgcacaggca
    21361 tacaaaagct aaattcataa accctgccta cggcgaatat agaggcccta aaaagcagga
    21421 ggcggcatga atgatcaata cttgcagtac gttcgtgaag aaatcatgcg agccaccatt
    21481 gattctagtg gcagaacaaa agggcagtta acagcgctgg tggagcaact tcaattcacg
    21541 aacgatcgtt acccgcgaaa gcgtcaattc atcgttgata gcgccacagg ccagagagtg
    21601 cgattaatga atcctcccgt atcagggcgg cagagtctcg caaaaggaga ggcgatacct
    21661 ctcattattc ctgatgagtt tctaaccgcg tcatggcgtc gtgctatcgg cgttattgat
    21721 gaatgtggct gcgcgtggat taagtggaat tatgccggcg acacagactt taagttgcaa
    21781 accgctatcg ttcagcatgg ctggcaggta tttagcgaat cattgaaagg taagcgcgta
    21841 gcagggaaga cgatggaaaa actacgtgcg ttgatttggc tcgctgctca ggacgtgaga
    21901 gcgggactgg cagggcgtga tattcttgag cagtgcaaac tcgccgaact ggctggcgtg
    21961 gaggatagca actggtgtaa aaattacagc ccgtattggc gtggaatgcg tgatgctttt
    22021 ttatctctgg atcgggactc actactggca accgcaaagg ctcgctctca acaaaaatca
    22081 gcttgctccc attcagctat tgcaaaagtc aactgattag gccatatttg tcactaattt
    22141 gatatgctgc caaagatgta actggcggca atgaaatgca taacccgcca tcagtgcggg
    22201 tttttaaaaa caaagagcgt aagacgtgct ctcaacccgt aatcaggagt gagcatgact
    22261 attgcccatc aatcaaaatc accgtttttc gtaaaattcc tcgtgcatga acttggcgag
    22321 atatgccatc acatttcatc agcgagagtc ctgcctcccg ctaattcagg tggtggcgct
    22381 ttcgtcgaga tagacgacgg ggattttttg gtttattggc ctcagtcact tgttgaaaaa
    22441 ctttcagata acgcgtcagt agccgcaaaa tcagcgggaa tttggatgcc gtatcggatg
    22501 agagaaaaac ttcagatagt ctaatcaaag aaaaaccaat caaggtcgcc atgtgcggcc
    22561 ttttttattt cctgtaaatc acacacagcg ccccgtacag cggaggtgga gtcatgatcc
    22621 gtatggacaa agttaccact ggtatttcat acggggcttc cggtgccagt tctggatatt
    22681 ggatgctcca gttactcgat acagtttccc ccactcaatg ggcggcaatc ggcgttctcg
    22741 gtagcctcgt tttcggtctg ctgacgtttc tcgtcaatct gcatttcaaa atcaaagagg
    22801 atcgtcgtaa agcggcgcgg gagagctaat gagcaaacgt aaaattgcag ccggtgttat
    22861 ttgttccgtc agcgtcatta tcgggatggt gcttgataag gggcaactga gaacgaataa
    22921 agcgggactg gaactgattg gtaatgctga gtcgtgtcgt cgtgaaccgt atgtttgtcc
    22981 cgctggtgta ctaactgacg gcatcggcaa tacgcacggt gttgtgagtg gaacgcgaaa
    23041 aaccgacgag cagatcgccg ccgactggga gaaaaacatc ttggtcgctg agcgttgcat
    23101 taatcgtgaa ttccgtgggc gtgatatgtc agataacacg ttttctgcaa tggtgtccgg
    23161 tgcgttccgg ctgggctgca cagggctgaa aacctattac agcagagcaa gcggccagcg
    23221 tgtgcaaacg tcaattcaca aatgggcgca ggctggtagt tgggcgaaca tgtgtaacca
    23281 cctgccggac tttgttaacg gcggcggtca gcgtttgccg gggctcgtca ttcgtgccga
    23341 aaaagagaaa gcgctatgtc tatccggcgt tcagtaatca ttgctgcggt atcgctggtg
    23401 gctggattcg ttactggtct gtacgttcag ggactgcgct gggatgctga tgctgctgaa
    23461 cgcgacagcg ctgtatctgc tgcaaacgaa cagcgtgcgg aagttataac ggcaaacgtc
    23521 atcacatcta tgcgcatcat caacacaatc acgcgagcga atgcagatgc aaaacagcag
    23581 atacagaatg aatctgagac gcgcattgtt catatacgtc aatcgttatc tggtgagaga
    23641 tgtgctgcta atcctgttcc tgctgacgtg gttaaccggc tgcgtgaaca cgcggacaga
    23701 atacgtaacg gctccagtag tttcgctccc cgctgaattg ctgattgact gtatcgtgcc
    23761 ggaaattcct tatcagatga catacggcga tagcgttgaa ctgaatgaac ggctgctgac
    23821 ggttatagcg cagtgcaatg ctgacaagcg agcgattaga gagattgaag ggttacgtaa
    23881 caactgatcg ggttgtggta atgtgtaagt gcttgcgtca aaatggtaat aattatcact
    23941 atttgtataa ttaagttatt agtcaacact tgaaagatta actattgccc cccaaataac
    24001 taacgcgctg tcgcatgtaa aacttcaagg aaaaatcatg acttatatag tgtatctgaa
    24061 aaactcggaa gacggttttt ttcactattg atgctgactc agcacaagaa gaaggtgtgc
    24121 aggttgtgtt ttataaaaat ggagaagtgg ttgcgcggat agatgttgat gatatccgta
    24181 gctatcttcc taataattaa agtaaaaaat gtaaacaata gatttgtttc cgttacaaag
    24241 gctcacttcg gtgggtcttt tttattgcca tcacaccatt cattcctgag tgagtgaata
    24301 gcgtaatggt tttataaaat gctaataact ccgatggtac cgcatagtaa gcagcatatc
    24361 gtataggttt acgtgggtga gggtatccgg taccacgggg tttatagttt ccagcataga
    24421 ggaatattct gttatggcat cgaaaaaagc tcacggcaga gcagcagaag cttttcgatg
    24481 tgctgactcc gctacaaaaa agattcgtca cactcctgct gaaaggcaaa agccaggttg
    24541 atgcatatag aaaggcgggg gggaaagcca aaggagattc agcccactcc aaagccacgc
    24601 aaatagtaag aaatagtaag gttgaatcct ttctggcgtc agttcagtac gaggcggtta
    24661 gttctgccat catgacgtat gaagaagcga tggagcgact caccgctatg gggcgaacct
    24721 ctattgctga cctggcaacg tttggcactc acgtagtcgg tgaagatgat gacggcaatc
    24781 ctatcagcca gtcggtatgg tcattcaaga acgccagcga attaaagccg gaacagatgg
    24841 ccgccatctc cgaattaacc gcagggaagg acgggctgaa aataaaaact ccacgacccg
    24901 aaagccgcca tcaagcaact ggcagaaatg cgcgggtggg aagcaccgaa gaaaaccgaa
    24961 gtgacagcaa cggttaaatc cgaaaacgtc aacatgacgc ctgacgaggc agcggaagcc
    25021 tacaagaagc tgatggggta aaactgcaaa aacagccact tcgtgcagca aaaaggctat
    25081 gcattttcag ccctatttta tgcatgattt attcaccgct ttttgaccaa cttctgcgag
    25141 aaaacataga gaaataagcg cgtcacgcgg tttgcgtggt gagtgctgtt tcggtggtgc
    25201 gcaaaatcca caatatgtta aatagcccca aatctcacac atttttcaga gtagcgactc
    25261 atgcctattc cgttcccgtt cgacttcaaa aaaccggact acacgcaggt tttcgagtgg
    25321 cgaatggagc ggttacagcg cattcgccag caccctgagc aacttccggc actgcggcaa
    25381 ttttacaaag ataatccggc acagttcatt atcgattggg ggatgactac tgacccccga
    25441 aacatcgatt acgggctacc cgttactatt ccgtttctgc tgttccccaa acaggaggaa
    25501 tggattcact ggatcatgac ccgcagacag aaccttgaaa acggcctcac agaaaaaagc
    25561 cgtgagatgg ggttgagctg gacggcgatc ggcatggcgt gctcactctg tctgtttaac
    25621 aaagatatgg tgatcggttt cggttcccgt aaagaggaat acgttgatag taccggcgac
    25681 cctaaagccc ttttctggaa agcacgtaaa ttcgttgaaa cgctcccggt tgagtttcgc
    25741 ggaagatggg atgagaaaaa acacgcgccc tacatgcgcg tcgagttccc agagactggc
    25801 gcagtgttga aaggtgaggc gggcgacaac attggacgtg gtgaccgtac cacgctttat
    25861 ttcgttgacg aggcagcatt cctgcaacgt ccgttactta ttgacgcagc actttcacaa
    25921 accactcgtt gccgtatcga tctctcatcg gtgaacggca tgaataaccc gttcgctcaa
    25981 aagcggcata gcggaaaaat tccggtcttt accttccact ggcgcagcga cccgcgcaaa
    26041 gatgatgagt ggtacaagaa agaatgcgag aaaattgata acccagtcat cgttgcccag
    26101 gaattggatc tgaattatca ggcatcagcg gaaggcattc ttattccgtc cgagtgggtg
    26161 caggctgcgg tcgacgccca tataaaactg ggtattcagc cctgcggcca gcgcctcggc
    26221 tcgatggacg ttgcggacga aggcaaagat aaaaatggat tctcggcgcg ttatggtttc
    26281 ctgttgcagg acgtcaaaga atggtcgggt gaaggtagtg acatttacgc ttcagttgtg
    26341 aaggtttttg gctactgtga tgacttcggg cttgatgaat ttcgcttcga tgaagatgga
    26401 ctaggggcgg gggcgcgtgg cgatgccagg gtgattaacg agcttcgtca ggccgaacgg
    26461 ttgggctaca tcacggcgac gccattccga ggcagtggtt cagtctttga cccagatgat
    26521 gaagcggtac caggtgataa cggtaagcca gcccggctga ataaagattt cttcgcgaat
    26581 gcaaaggcgc agagctggtg gcaccttcgt aaactcttcc gaaatacctt cagggcgatt
    26641 cagggcatgg attatgaccc tgacgagata atttccatta gcagcactat agaaaacaag
    26701 gaccgccttc tgatggaact gtcgcagcct acctggtcaa aaaacgcagt cggtaaaatc
    26761 cttgtggata agcaacctga aggcacgaag tcacctaact tggccgactc agtgatgatc
    26821 aactacgcac caatgaatac ggctatggat atctgggcga aactcggagc ataaacgcta
    26881 tggcgaaaaa aaacaggacg agtcgccacg gcggattcgt atgacaactt cattgcccgc
    26941 gtaggcatgc agcagcctaa ccagcacgcc gcatccacct atcgggcaaa ctataccagc
    27001 cgcaaccgtc tgctgattga atacgcatac cgttcttcct ggattatcgg cgctgctgtc
    27061 gattcaaaag cagacgacat gacgaaaaag ggcgtacgca tcaccagcga gatcgacccg
    27121 aaacggcggg gtattctcga atcacgcttt gatgagcttc agttatggga ttgcattaac
    27181 gagacgttga aatggtcccg gctgtacggt ggtgctgttg cgttgatcct tattgacggt
    27241 caggcaccat taaccccgct gatactagat aaggttggca aaggtagctt taaagggctg
    27301 gctgttcttg accgctggat gataaaccca cagctcaaca ggcgcattaa ggcgctaggg
    27361 ccaaacctcg gcaagcctga ggtctacgac atcgtgacaa cagcgcaggg acttcctgcc
    27421 tggacggttc accacagccg cctgattcgc atggacggtg tgaagctgcc gtatcagcag
    27481 aaaatcaccg aaaacgagtg gggtatgtcg attgtcgaac gtattttcga ccgactgacc
    27541 tcctatgaca gcaccagcgt tggcgctgcc cagttggcct ataaggcgca cctgcgtacc
    27601 gcgaaaatta aaaagctgcg cgagattatc gccatgggcg gcaagccctt tgaggcgctg
    27661 ctcaaaaata tggacatggt gcgccagttc cagacgaatg agggtatgtc cctgtttgat
    27721 gcggaggaca ctttcgaaac tcattcgtat tcttttgctg gcttatccga tctgttgagc
    27781 gagtttaaag aggatattgc gggggctgtt ggtattcctt tggttcgcct gttccgtcag
    27841 tcaccgaagg ggttttcaac tggcgatgct gacctggcaa attactacga tgatgtcgga
    27901 acgctacagg agcgagattt acgcccccat atccgcctgc tattcgatgt gctgcaccga
    27961 tcagagtttg gcgagccttt gccggaagac ttcacgtttg agtttaatcc cctgtggcag
    28021 atgtccgatg tggaccgctc tacggtagca accaacacca ctaccgcgtt ggctaccgct
    28081 gttcgggatt taggcatgtc tcctgctgct gccctgacgg acttacgaga gcttgcggat
    28141 gttactggtg tcggcgcttc aataacggac ggggatatac agaatgcggc gaaagagtgg
    28201 gcggagtttg aacttgaagc cgggcctccg ccggaaatcc gagagtcagt acctcaaaag
    28261 cctacaggcg atagcgcagc aagtcggggc ggtcgtagct ggttcgtacg atggttctca
    28321 ggctagcgct gactcgataa ctaacacgct ggtggattat tcggacgtga tcggcgattg
    28381 ggctgaaatg gtcggtaaaa agatgttcgc gcaggtggag gaagaagagt ggaaccagtg
    28441 gcgatcagtg tcacaagaaa tcgctgctgg cctgcgtgat atcgtcggaa atacgcctgt
    28501 tggttacgtt gcacaggata ttgtggcccg ccaagtccag tacatgaagt cgttaccgct
    28561 ggaggccgca agccgtgtat ctgagatcca gcagcgggct atgcaggcag ttatcaacgg
    28621 tgagcgtccg gatcaacttt acgaaatgat aatgcaatcg ggtgatgtgg ctgccagcag
    28681 agcgaaaatg attgctcgta cggagatagg gcgagctacc ggcgcactga cgcaggcgcg
    28741 agcgctggcc gttggttccg aggggtattg gtggcgcatt gagggcgctg gaacgcgccc
    28801 atcacacaga aagatgaagg atgtgtttgt gcgatgggat aacccgccaa cgcttgacgg
    28861 tatgaccggg catgctggct gcctacctaa ctgcaaatgc tggcctgaag tacagattcc
    28921 agccccgaga ggttaatcta aatagcactt tttgccaaat aaataggtta aaaaacaatc
    28981 aaatgccatt ttttggcctc tgtgggttga taaataggag tgagcgaaaa cgctcgtatt
    29041 caacctaagg gggccaatta tggcactaac aaatgaacgc cttattgata gcttaaggca
    29101 caaccgtaaa ttgcttgatg agatttatca gtcaggtaaa tctcagtatt acaacaccga
    29161 cattattcat gatgccatcg actcaattct tgatgagcta aggcgacgta gattccctgt
    29221 ctaagagagg cccgcttatg cgggcctttc cttttcccgc aatccaacag gtaacccatg
    29281 aaatatttct ttaaaacccg cctgggtaac acccgttacc agctcgctga tggctcggtg
    29341 ctgttcaaag atgtgccgat agggcggact ggtgagcagg tctatggtgc cgaagaattg
    29401 ccagacatcg agcctgacag tcaggggttg atagtcgttc gtcggacgcc ggaagaggta
    29461 ttcagcgaac agaccattgc atcctttgaa ggaatggcca ttaccatcgg acatccgaaa
    29521 gacttcagcg gaaacattat tttcgtaaca ccgaagaatt ggcggcaact ggcaaatgga
    29581 cacattcaga acgtcagacg cggtaagggt gataaatccg atctgctggt ggcggacgtt
    29641 atagcaaaaa caccagaagc cgttgacgcg gttgaaaacg gtgatgacga ggtgagctgc
    29701 ggttatgacg cagattaccg tcaactatcg ccaggtgtcg cggatcagta cgcgataact
    29761 ggcaatcatc tggctctcgt cccgaacggg cgggccggtt cacgctgcgc acttggagat
    29821 agcatgccaa ataaagcaaa aaattggtgg gagcgccttg ttcgcgctcg taaaaccaat
    29881 gacgccgccg aaatggcgaa cctgatcgat aacccgcctg acaatatgac tggtgatgat
    29941 gatgtgtcat cctctgtcac tcctggtggg gtagttatca acttgtcccc gcaaaacccc
    30001 atgccggcct ctacattgcc gggcacgggc gatgcagagg aagacatccc cgcatggggt
    30061 aaagcgctga tcgaagcggt cgccaaactt acaccggcag cgcccgcaac tggcgacgag
    30121 gatgaagagg agaataaaga ggaagaaggc gcagttaccg gtgatgccgc gtatcgtgcc
    30181 gatctgattc agccaggtat tcagctaccg gttaaagcaa aacctaccgc gttcaagcgc
    30241 tccgttctgg ctgctgccga tcagacaatg gttcgctcta ttgtgggtga tgctgatatc
    30301 accaaactga aaaaagccac tgtggatatg gcgtttaacg ctgtctctga gctggcgaaa
    30361 aatcgcaaca ccgcagccaa aaccactgac ggtttccgct ctatcaactc caacaccacc
    30421 aaaaccatcg cggagattaa cgccgccgcg aaggaaatct gggctaaacg ctaacgaggc
    30481 attcaatgga caacactctt ctttaccgga tgccttcggg catcgccggt gcaatctctc
    30541 gtccgcagga tctgacggtc gaacctcaga cgctggacgg cacgaaggca ttcgccgctt
    30601 acggcctggc cgggaagttc tccgcgggta agtttgtgcc gattgaggca gctgatacag
    30661 ccgctgttgt ggtgggtatc tatgttcgcc cgtacccgac agcatcccag ccagacaagg
    30721 tgcgccagat tggtactggt tttaacttcg cgggtgactg catgcggcgt ggttacgtca
    30781 ctgttaacct cggcgctgat gccagctctg ttgctctggg cggggctgtt tatatgcgcg
    30841 tggctactcc atctgcatct agccctctcg gttccttcct ggctgctgct gacggaacca
    30901 atacagtgca aatcactaac gcttacttca atggccccgg cgatgccaac ggcaacattg
    30961 aactcgcctt taatatttaa ggaaatcgca aatgccaatg acatttgacc aggccaccat
    31021 tgatagctct ggtgcctttc ttgttcatga gctggaacgc ctcgaccaga atctgaacct
    31081 tccgctgacg tcccagacgt ggagccgcga tattcagtta cgcgaagatg tgtctatcgc
    31141 tgacgaaatc agctccttca ccaacaccac cttcgctgct gcgggtacgc ctaacgccaa
    31201 tggtaaaaac tggatcagcc cactggctac tgcgattgct ggtatcaacg ttgacatcga
    31261 gaaaaagggt ttcccacttg aattatgggg tatggaactt ggctggaccg ttatcgagct
    31321 gaatgctgcc gcacaggtag ggcgccctat cgatacccag aaatacgatg gcatgcagtt
    31381 gaagtggaat atggacaccg acgaacaggt ctacatcggt gacttggcaa aaggcgctaa
    31441 aggtctgctg aacctcattc aggtgacgcc gaccaacgcg accaaaacgt gggcaacctc
    31501 aaccgccgac gaaattcgcg ctagcatcaa ccaagtgctg agcaatgcat ggtctcgttc
    31561 tgcttactca aaagtgccgg aagatttgct gatcccacct gagcagtatt cgtttctggc
    31621 gagcaccatt gtttccagtg ctggcaatca gtcgctgctg acttacctgg aaacaaacac
    31681 cattgcttac caccagaacg gaaagccgct gaacattcgc ccggttaaat ggatgaaggg
    31741 tcgcggtgtg ggcggtactg atcgcatggt ggcttacacc aacgataaga agtttgtgcg
    31801 cttccctatg gttccgctgc agaacgtccc gatccagtat cgcggcctgt atcagctggt
    31861 gacctactac ggcaagctgg gtgcggttga gccggtttac ccagaaaccc tgaactacat
    31921 ggatggcatt taatccatat acagcccctt ctcaggggct tttttctaag gaattccgat
    31981 gaagaaaatc tatgtactgg tcgcgttcaa cttcaacgac ggtgagaaaa ttactccctt
    32041 cgctgcaggc tttcacagtg tggatgatgc ggtagcggaa cattggttcg tcaaagccca
    32101 ctgctcgcct gatggcgccg cgccggaaat tgctgtaagc gacactcgca ttgcggagct
    32161 ggaggccctt ctgtcacaaa aagatgcaga tttgcaggcg tcggcgttga ccgctgcaga
    32221 aaaggacacc cgcattgcgg agctggaggc cgaagcaaaa aatctgaccg cgaaagtcga
    32281 tgagctttct aaggctgctg ggaatggcaa aaaataatag cctgcccacc gtcgctcagt
    32341 tccgtgaaac cttcccgcaa ttctctaacg aaactactta ccccaacgca tccatccaga
    32401 tgcgtctgac acttgtcgac gcgctcatga gcgaaagtcg ttttggcccc gatgttttcc
    32461 cttatgttgc gggcctgttt gttgcgcatt acatggcact agcggcggtg gataaccgct
    32521 ctgtcgctac tggcggagcg ggcggggtta atactgggat tatgacggct aaatctgtcg
    32581 ataaggtaag cgccagctat gacgccagca acacgctgaa tcctgatgcg ggtttctgga
    32641 acaacacgcg atacggttcc gagttctggg aatatctgat gattttcggc acgggcgcta
    32701 ttcaactggg tacgccgtaa tgaaaagcgg cgtgaaggtc acctctgaca atgccgactc
    32761 aattattgat gccctgacac gcctgtccgg gatggatgtg ctggtgggca tacccgaggg
    32821 taatgcgtcg cgtgatgacg gtcagttgaa caacgccgag atcggttatc tgcaatcaac
    32881 tggtgcaacg attgagatcg acggtgctgt cgtcacgtta ccgccgcgcc catttctgga
    32941 tatcggtatt gaagatacac gtgagcgcac cacggcacac ctaaaagccg ccgcagaact
    33001 ggcactggag gggaacgccg ctggcgctga gcgtgaactc gaacgcgctg ggattatcgc
    33061 ctctgacggc gcgaaaaagg tgatcagtga tggtgaccga ctcgcgccgc tttccgagaa
    33121 aacactcaaa aaacgacggg ctaacgggtt gctgggtgaa aagccgctat acgcacacgg
    33181 ctacctgttg cgctctatca cctatgttgt gaggaaataa tcatgccgct gctcgatgtt
    33241 tccgaaatac tgctcgatcc cgattttgct gatttctcgc tgatttgtca tcggcaggtg
    33301 cagacagtgg acgatgacaa cttcccaacc aacacaccgc aagacatccc attttctggc
    33361 gtggtaacag tcgatcgctc actcgaagca cggcgcatgg ctgccggaca gaacatcagg
    33421 ggggcaattc tcatcgtgac gcagttccgg ctgacacagg ggcaaccgtc gtcaggcacc
    33481 acgccgcgac tggatgccga tgtggtgacc tataacggac gccgataccg cgtgacgttt
    33541 gtcgatccgt atacgagcta tggcgcggga tttgttcagg cgcactgcga gttaatggat
    33601 tttgacggag ggatacccgt tgagcaatga cagtacatcg cgtggctatc tgagccctgt
    33661 cggggataca cctgcttatg acgaagagct tgagcgggaa atcagtcgat ggatccgtgg
    33721 cgtgtctggc ctgcctgtcg cgcaggtttt cccgcgctgg actgacccgc agccacaaat
    33781 cccgaaaaac ggcgtgacat ggtgcggatt cggtatcacc accgtgccgc agccgctcag
    33841 ccagtcagac gttcaggttt cggaagacca gtccgaacaa tggtcgtggg aatccgtgac
    33901 ggttatctgt tgcttctatg gccctctcgg tgccagcacg gcggccacgt tccgcgcggg
    33961 tatcttcgtt gagcagaaca acgccgaact aaacctgacc gggctgtcgc tggtggaggc
    34021 ggggactctc tataacctgc ctgagctcat taacaaccag tgggttcgtc gctacgacat
    34081 cactgtcacg ctatcccgta aaaacacgcg cacgtacaac atcaaaacgc tggtggatgc
    34141 gccagtattc tttggagatt aattcatggc acagcagggc ttaccgttgt ccaatgttgt
    34201 caacgttgat gtcatcatgt cgcccacggc ggcgacaggc cgaaactttg gctcgttgct
    34261 gattctcggc acatcaacca ttattcccgt caccgagcgc ctgcggcttt attccggcgt
    34321 tgaagatatc ggcgatgatt tcggtgtgga ttcgccagaa tacgccgccg ccacggtgtt
    34381 cttttcacaa tccccgaaac cgacacaggt gtatatcggg cgctgggcga aaacgctcgc
    34441 agccggagaa accggagcgg tcgaaacgct gattcaggcc gtcaatgcct cgcttcagtt
    34501 tactaactgg tacggattgg gggtggctga cagcgctgat ctgctggatg ccgatgtact
    34561 ggcggtggcg gcggcgattg agtcggcccg cgtcagtcgc atctttgccg ttactactga
    34621 tgcggcggca acactgagta caaccagtac cgacgatctg gcatcaaaac ttaaagcggc
    34681 ggggtacgca cgcacattca cgcagtattc cacaagcagc aaatatgcgg cgctgtctgc
    34741 gtttggtcgg gcgtttaccg tgaattttaa cggcagcaac accaccatta cgctgaagtt
    34801 caaacaggag cccggcgtca cgtacgaaac cctgcaaatc aatcaggccg ccgccgtcga
    34861 tgcgaaaaat tgtaacgttt acgtgtacta cgaaaacgac acggcaattc ttcagcaggg
    34921 tgttatggca aacggcgact tcttcgacga acgccacggg atggactggc tgcaaaacta
    34981 cgtacagacc aacctgtaca acgtgctgta caccagcaca actaaagtgc cgcaaaccga
    35041 tgcgggtgta acacgcttgc tggcgaacgt tgagcaatcc atggatcagg gcgtgacgaa
    35101 cggcctgatt gctcccggtg tgtggaatgg tggaccgata ggccaactgg caagcggtga
    35161 cacgctgaca aaaggctact acgtctatgc gcagcccatt tccgcgcaag cgcaggcaga
    35221 ccgcgaagcc cgtaaagcgc cggttattca ggtggcatgc aaactggccg gtgcggttca
    35281 ctacgccgat gtgcaaatca acgttgtccg ttaaggggga tcaatgagca cctattcatt
    35341 tctggacgtt accgcgtccc tcgctggccc caccggaatt gtcgatttcg gttacggctc
    35401 ggcagcctcg gaagagggta tcaccattac catgactgag gcgaaaaaca cgatgaccat
    35461 tggtgcagac ggcgaagtga tgcacagcct gcacgcgggg aaatccggca ctatcactgt
    35521 cacgctgctg aagacctccc cggtaaacaa aaaattgtcc cttgcgtata acgcgcagag
    35581 ccagtcttca gcgacgtggg gcaataacgt catcgttgtg cgaaacaagg caagcggtga
    35641 cacgtcaact gcgcgctctg tcgcgttcca aaaacagccg gatcacgcta acgcaaaaat
    35701 cggcaacacg gtgtcgtggg tgtttgactg cggaaaaatc gaccaactgc tgggagagtt
    35761 ttaattggag atcacactga aaagccatga ttaccgcctg tcaaagctgg gcgtttttga
    35821 ccaactgaag gtaacgcgaa aattactgcc gatgctggcg ggcatgctgt ctaacgcggg
    35881 tgatttgaag tcgctacagg cagacggcgt tacgcaggca ctcccccaga ttgctgatgc
    35941 gattgcggcg ctaccggacg acgatgttaa cgcgattatt cacccctgcc tggctgtcgt
    36001 ggcgcgtaag cacgataaag cctggacgcc ggtgttcagc cacggtgagc tgatgtttga
    36061 cgatatcgat ctgttcacca tgctgtcgct ggtggcgcgg gtggtcgccg actccctcgg
    36121 aaattttttg cacgaactcc ccgccagcga gacgcccacc ccgccagcgg cttaaccctc
    36181 gatacgctgc ctgacggcga agactacatc atgcgcccgg ttgatgctgg gtacatccct
    36241 tatacggcac tgaacgacgg atctgtcgat ctggcggata tcgcgcgcat gaatgattac
    36301 ctcgatatga aggcggataa cgaataccgc atagcgaaat ggagagctga taatgaacgc
    36361 tgaggctatc aaatcgtttc tcgtctcgct gggatttgac gttgatgaag cgggacagcg
    36421 caaatttgag gcgggggctc atcagcgcga ccgcaaaggt agtgaagctg ggtgtggcgg
    36481 tggaggcggc ggcgttgtct gttgtggcgt ttaccaccaa aatagccagc ggactggatg
    36541 atctgtattg ggcatcccag cgcaccggcg caacggtagc aggcattcag cgcattggct
    36601 atgcggtcgg gcaaatgggc gggagcgtca acgccgcccg ctcatcactc gaaaatctgg
    36661 cgcagttcat ccgaaacagt ccgggtgccg agggcttttt aaaccgactc ggtgtgcaga
    36721 cgcgggacgc cagcggccag atgcgggaca tggccagtat ttttacgggc gtaggccagc
    36781 gcctgaacag catgccgtac taccgggcta atcagtatgc gcagatgctc ggcattgacg
    36841 aaaacacact gatggcaatg cggcgcgggc tggggcagtt cagcgcagaa tataccgcca
    36901 ccgccaaggc gatcggattc aatgcagagc aggcggcagc cagctcgaat cggtttatga
    36961 cctcgctgag ctcgttcggc atgatggcgg gtatggcgcg ggacaaaatc ggcgcgaatc
    37021 tcgccagcgg tctggcgggc tctatcgata acttccgtaa actcatcgtc gataatttcc
    37081 cacgaattga ggcggggata acggccgtta tcaaatccat tttgtggctg gctgatatcg
    37141 tcgggcgcgt agtctatcgg ctggttcagg ctgcgggatc cattgttgac tggtggaagt
    37201 cactggatga cagcaccagg caactgatag cactattcgg cgcgctggtg actgcatggt
    37261 atgtcctgaa tagcgcattc actgcgtcac ccatcggtcg aatcattatg ctggtggtgg
    37321 cgctggccgc actgattgaa gattacgcca catggaaaga gggtggacag agccttatcg
    37381 actgggccaa atgggagcct gaaataaacg cagcgatcga tggtattcac gacaccattg
    37441 atgccgttaa agagctggcg ctcgaagtcg gcgcactgtt tggtatcgac ccgaaacagt
    37501 ggagtctcaa gtgggaattc agcaatctga ttcataacct cggcgagctg gggaaaatgc
    37561 tgaaactcat cggcgacctg ctcaacgcga taaatgaggg gcgctggtct gacgccgcga
    37621 gcatcggaaa acaactgctg aatcagggcg acgaaaaccc gtcagcaatg cccggcatcg
    37681 atgcggcggc cgttcgtcat cgtgaatggt tactgggtaa atatcacaac ctgaataaca
    37741 aggtgaatga gtttttacct gaatggctgg gtggggttaa gcgtccgcag cctacaaaat
    37801 caggcgctca gctgctggga tggataacac cattatttaa ccaactggaa aacctctaca
    37861 aactgccatc cggtttactg cgtagcgtgg ccaccactga atcagcgggt aatcccaacg
    37921 ccatatcaag tgccggcgcg caggggctat tccaaataat gccgggaacg ggaagggatt
    37981 tggggctgcg tggtaatgac gctttcgacc cggttaagtc tgctaacgcc gcagcgaaat
    38041 atctcagcca gttgctacag gcaaacggcg gagatctgga taaggcgctg gcatcctata
    38101 actggggtat cggtaatgtg caaaaacatg gcatggcttt gatgccgaga gaaacccgcc
    38161 agtacatccc caaagtacga agtggcatgc cgagtatcaa tcaggaaacc aacatcaccg
    38221 tctacggcgc gactgatgcg caggcgacag ctgacgcgat cgcaggtagt caggatggcg
    38281 ttaactcccg actgacgcaa caaccggagc ctaattaatg gatgtcctat ccgtactgtt
    38341 taatcagcga agtcgttcta ttggcctgat cattcccgat gttgtcattt cagaaaaaca
    38401 ttcggatgtg ctggaaatca cggaacaccc cgtcgagcgg ccaacgaata tcgttgcatc
    38461 ccagtattca ggaacgatct ctgatcatgc ctaccggcga ccctcagaaa tcgtgatgga
    38521 ggtgggtttt gctggcggtg gttcattgct ggattcgtcg ttgctagaca cctcaagaat
    38581 cggtctgagc attggcctta gccccaagga ggtttatcag cagttgctcg atctgcaacg
    38641 cctgcggctg ccattcgatg tgacgacagg aaagcgccag tatcagaaca tgctgatccg
    38701 ctcgttggat gtaaccactg acagaaccag cgaaaacgtg ctgatggcgg tcatcacgtt
    38761 acgagaggtg attatctccg aaacgagtga catcaatgtt gcgccgaaag aaaacatgac
    38821 gctgggaacc agcacatcag cagtcattga ttcgggagtt aaaaccccga cacccgttaa
    38881 taaccgatca gtactcagtt cgattggtgg ggctatatct ggattggtgg ggggcttatg
    38941 aatgttactg aaattccgtt aagtcctaac aaccagacgt tcagcaccca gcttaatgga
    39001 gggacatacc agataagcat cgtctggcgc gaaacgttct ggtcactgga tttgatggat
    39061 agcgcaggcg tgttgatagc aggaagtatc ccattaataa ccggctatga cctgctgttg
    39121 caatacgctt acctgaatat gggtttttct ctgattgttg tctgcgatgt tgccgggcag
    39181 gaaaacccga ctaaaaccga tctcggcatt tacagccatc tttatgtggt aacggagtaa
    39241 tcatgtctaa aaactggatg cgtcattttg aactgcaagt gctgaatgat aaaggtgaag
    39301 ggattagcct aagtaatttc aaagtgacgt ttaacattga gaagatgcca tcctcccagt
    39361 ttggcgggtt cgtgggtaat ttcaggattt ataacctgtc acgcgatacc caaaaccgca
    39421 ttatgggtaa cgagttcagc aaaatccgcg ttattgccgg gtatgacggt atcgcgccag
    39481 atgttaaggc cgctgatgtg ggcattgctc gtagcgtgaa tgctgatgat gtcggtcaaa
    39541 tggatgatcg aaactatggc ctgattttta acggtgatat ccgcttcacc atcaaaggta
    39601 aagacaacgc cactgacagt tggatactgc tgcaatgtat cgactgctgg gaaggtcatc
    39661 ttcacggcag ggtaaaaacg acggtggcgg cgggatggac gtatgaagac ctgtttaacc
    39721 tcggcatgaa atcgctggag ccattcggta ttacccgtgg caatgtacct gacgtgttgc
    39781 ataacaccgt attcccgcgc ggctgcacta tttacagcac caccagcaag ctgatgaccg
    39841 agatcgccga aaactgtaac gcgtattttt ggtatgacaa taatcaggtc aatatcatcc
    39901 ccaaggataa gtatattggc gcaaaagcgg ttgtgctgaa cgctgataca ggcctgatcg
    39961 gtatgccaca gcagacgatg ggcggcgggg tgaatgtgcg atgcctgatt aacccaaata
    40021 ttaaactggg tgggctgata cgcatcgatc aggcttcagt gtatcgtgct gcgctgggta
    40081 atggtgatgt ggcgatggcg aacgggcgga tatcggaaag gaatcaggat ggggtgctgg
    40141 tggtagacac cccgcagcgt ccgaaaatga tagataccga cattgcttat gcgggtccgg
    40201 gcgttgacgc agacggcgat tactttgtcg gcatgatcaa ttatactggt gatactcgcg
    40261 gacaggcttg gtacatggat ttgctctgtc tggcgaaagg gaatatgagt ccaatgagca
    40321 accaaaattt taataaggct ttttagcgtg aaaaaatggt ctctatgtgc gtgcctgatt
    40381 tactgcctct ccactggtgc ggcttttgct gattctcaat gcggaccgtt ctatttaggg
    40441 acaagtgcgg cggatgacgg ctgggctcgt atcaacgggc agagaccaga aacccaaaag
    40501 gcgacgttcc tcaaggaaaa ggatgattac agcaacatca aaattcagtg gatgctgtta
    40561 gatgccaagg cggggcgctg gcttggtctg gactatatca agcgtgataa aaaggcgctc
    40621 ctcaacgtcg aagtcatccg caaaaacatg gacgaacctc gacgtttctg gacttatgat
    40681 tgcatcaaaa ttcagtaatt ctttttcatt aatgctgttt ttctattatg atgaaatgga
    40741 tctttcctca taacacttga ctaagcgatg aatcaacctc aactcgaaac ggatattctt
    40801 cttgatcaac tcgtcccttc tatgatgagt ccaaaacaac tcattagtga tattgagctt
    40861 atgggcatca taaggaaggc tcgcaaaatt ccagatagac atgaaggtct acttgttgaa
    40921 ggcttggcta aattgattaa ggggcagttt gaagaaggcg taagcctatg tgagcgatct
    40981 atcgctctca atacgtccga tcacgttagt tggctcaatt tcggagtaac cgttgcttgc
    41041 agggggcatc attctttaca gaacgatctc ttatggcgtg ccatgagtca tggtgtaacc
    41101 gaagcataca taaaagcgct gtcaataggg gctttttggt tggatattga gatgtttgaa
    41161 aaggctttct cttatctcga aaaaaccgga ttgcttgaaa cgtcgttgag cgatgagcag
    41221 agacgtgagg ttatgtttat gcgtggattg ggtcagaaac ttgaattcat atctccgttt
    41281 gctaaattgg caatggagat cgctgaaaac gagcgattaa acgttattaa tagctatgtt
    41341 tctggtgata acgaggatgg ctattgctat gcattgattg ttgatgagca ggatccggac
    41401 aaacttttag agttaaacaa tcttgcagtt gaaatgatta ttaaaaggga aatgcagcac
    41461 gttgattgcg ttaccgtttt tatttcagag gaagaactgt aatgtcggtc gaccatgctt
    41521 gctttcttga cctcgcgtca gaatctttag atggaaaaaa tagagagata gatttccgca
    41581 atagtatcag caggtcttat tattcacttt atcattcagc cttaagatta accaagggta
    41641 acattgcgaa tacgaatagt agtggcaacc cataccctgg gggaatgcat aaacgatttt
    41701 attcatatct aattgataat gcagctgata accatggact tgataaagaa aaaacagtga
    41761 aggtcggttt ggctctgaag caagcgcatg ccttaaggat tgccgctgat tatctcctcg
    41821 aacaacgaat aagtagacca acggcagaaa tggcttacaa aaaagcatta gaaataaata
    41881 cattaataga agacatcaat aaataacccg ctccggcggg tttttttaca cccggagaaa
    41941 atatgcccgt accacttaaa tcccaaacta acagtgagca ggacctgatc gacaccgtga
    42001 tgaatcgcgt gatgtccaat cttcgcgttg ccatgcccgg tgttattcag tcgttcaatc
    42061 cagacgatgt tacgtgcgta gttcagccat cgatcatggg gcaggacaca ggtagcgata
    42121 gcaataaaga gtcaaatccg ctgcaactgt taacagacgt ccctgttgta ttccagcgcg
    42181 gtggcggttg cacgctaacg tttccgattg agccaggcga tgaatgcctg attatctttg
    42241 ccgatcgctg tattgatttt tggtggcagt caggcggcgt tcaggagcct gtgtcgaacc
    42301 gcatgcacag cctgtctgat gcatttgtca ttgtgggcgc tcagtcgcag gcgaacaaaa
    42361 ttagcggtat cagtaccagt gctgcgcaac tgcgaactga tgacggcgcg gcattcgtcg
    42421 aagtggcagc cggtcacaat atcaccgtca caacgccggg caagttgacc gccagcgcgc
    42481 agggagggac agaaatcaca tcaccgtcga ttgtgctcaa cggcaacgtc accattaacg
    42541 gcaacctatc gcaaggcatg ggtgacggcg gcggaacggc aacaatgaac ggtcccgtaa
    42601 acgtcaccaa cgatgttact gcgggaggta aaagcgtaat gacgcacacg cacggcggcg
    42661 tacagccggg cagcggaaat acaggagcgc cgaactgatg cgatatcgac gagaaagtgc
    42721 ggacggcgat tacacattcg gtcagggcga tgatacctgg cttgttaatt cacctgaggc
    42781 ggtggcgcag gcggttaaaa cccgatttga gttatggcta ggccagtggt ttctggatac
    42841 cgcagccgga acaccgtgga ttcagtcggt gttgggaaag cagcgaccgg acacctatag
    42901 cctggctatt cgtcagcgaa tccttgaaac gcagggcgtc agcagcatta gcgaattcaa
    42961 cacgacagta aacagcgcca cgcggcgcgt atcgtttact gcgacaatcg aaaccatcta
    43021 cggaacaacg acagtaacta gcgaggcata aatggcctta aatctcgaca cgctgggctt
    43081 atcggcaacg gtaaccgctc aggggatcag tgcgcccgat tatcagacca tactcagcac
    43141 cattactgac tacttcagac aaatttacgg taccgatgcc tatctggaac cggacagtaa
    43201 agacgggcaa atggtggcgc tggtggcgct ggctatacac gatgcgaaca catcggccat
    43261 cgctgtttat aactcattct ctccgacaac agcgctatct gatgctctga cgcgtaacgt
    43321 aaaaatcaac ggcatttcac gtcacgctgc ggtcaattca actgtggatg tgacgctaag
    43381 cggcgtgcaa gggacaacca tcacgaacgg atcggtgaaa gattccaacg gagttatctg
    43441 gaacttgcca gcgtctgtga gcattgggat aagcggcacc gttatcgtta ccgcgacgtg
    43501 tgcaacagcg ggagccgtgg ccgccgttgc gaactcagtg aatcaaatca acacgccgac
    43561 gcggggctgg ttgtccgtaa ccaatcccag cgcggcagat gtgggtacag cagcagaaac
    43621 cgacgcagca ttgcgcgttc ggcaggcgcg tagtgttgcg attgcgtccc ttacaccgtt
    43681 tgaggctatt gatggggcga tagcgggaat tgacggcgtg acacgtcaca agctgtatga
    43741 aaacgacacg ggctctgttg atgttaatgg cctgccggca cactcaatca gcgccattat
    43801 tgagggcggc aatgttacgc agattgcaca gacaatccgg gggaaaaaag ggcagggcgt
    43861 ggcgacgttc ggcagcacgg ctgttacggt accagacacc tacgggaata atcacgtaat
    43921 ccggttctct cgtccgatcg atgtcccgat attcgtttca atctctatgc gtgtgtttac
    43981 ggggtacacg acagcagtag acgagcaaat gaagcgatcg attgctgatt acatcaattc
    44041 acttgatatc ggtgatgatg tgttgctgag ccgtgtttat tccccggcca acctcggcgt
    44101 agtgagtggc ggtgatgcgc ggtattacga cattatcgaa ttaatgctgg ggcgtgcgtc
    44161 tggcagtgtt tctcctgcaa atgtcgttac tgcatacgat gaatccccaa tatgcagcgc
    44221 tgacaacata tcgatcgcgg tggtgccatg agcaaataca ccgagctaat ccccaactac
    44281 aacgcaacaa aaccgctgtt cgtccagcat gttgacttat ccacccgccc tttaatcgat
    44341 gtttccagcc aaatgcaggc gtttgttgcc gcgttcgata ttgataacgc agtcggcgat
    44401 cagttggacg ttctcgggga atggataggt cgctcacgca cggttatgca accaattgtc
    44461 ggcgtttact tttcattcga caccgataac gtcgggtatg accagggcgt ttggcagcga
    44521 ccgttcgatc ccgattccgg ctttgttgat ttatcagatg aagcgtaccg cattgtgctg
    44581 cgcacaaaaa tcgcgattaa cagttgggat gggcaaaacg attctctgcc cgcaatcctt
    44641 gattttgcga cagcaggatc ggggctgagc atgcagatta tcgacaatca ggatatgacg
    44701 atctctgtgt gggtgtttcc ggaaacgtcc attgattccg tttcgcgtga aatattggca
    44761 gtcatccgac aggggtattt aacagtaaaa gctgcgggag ttttttcagg ggaaattctg
    44821 tatccgtcag tcggaaatca gtttttcggt tttgacatcg aaaatgaata catcgccggg
    44881 tttgatcaag gcgcatggga gacatcacta aatggctaac aatgaattta aaccgtttgc
    44941 gacagcggcg ggtgccaacg ttacatcaca atccgagtgg gaaagcctgc cagcactgtt
    45001 tagcggattc acatccggta aggcgtcatc agcgcaaatc aataaagcgg tccggcaggc
    45061 ctctgtaatt gcgtctgtcg tggctcagtt tattgcagat acgaatgatg ccgacgtatt
    45121 agataacggg aatatcgtag cgctagagca gtctctattg cttgccctac aaaagaacgc
    45181 cgccagtaac attcccgtcg catcaacaac ggccgcgggg attgtgcgac tcagtaacgc
    45241 cacaagcagc gacgctgaga cattagctgc gacaccattc gctgtgcgtt ccgtaatgca
    45301 aaatgctgat gggcggttag caaaaaacca gaatggtgca gacataccgg acaaagtcgc
    45361 gtttgctaaa aacgctcagg ttcctcatct gggcagctca tggatcgaat ttgggggcag
    45421 cgctggtgcg tggacaacct cacaatttat tgattttctg aactccatcg gggcgttcga
    45481 tcacctgtat ttcgtgtgtg ctggcacatg gagtttttca gcaaaacaaa aaaatcatcg
    45541 atacggggtg tgggcatgtc gaactggcgg gcgcggttgt tgaggttttt gcgagccggt
    45601 ttaatcttcg tactgtgcgc gtcacaacga tgtcatcatc gagtgacccc ctggcaattc
    45661 agggtcagtt cgtttatgtc gaatcagaaa cgcccggtag cggtgagtgg cgacgtgaat
    45721 tcaatactaa aaatctaacg gcgaatgata tcggcgctgt ccaaattagt gagatcgtcg
    45781 gcatgcctca accgtggccg ctcacaacca taccgtcagg atggttgccg tgcgccggcc
    45841 agtcatttga tacgtcagca tatccgattc tagcgagtcg atacccatca ggaatactgc
    45901 cagatcttcg tggcgaattt attcgcggct gggataacgg gcgcggcgtt gaccctgccc
    45961 gaaccaatct gtccgggcaa gcgtttgcaa cagagtcaca cacacatgca agtggatcgc
    46021 tcgaagtcgg gagtggaacg ccgttgtatg tcggaaaagg gctgcaagat ggaggaggaa
    46081 atttgtactc ccgaaccggc gttaataaca acgctggtac tgaaacccgc ccccgtaaca
    46141 ttgcatttaa ctacatcgtg agagcagcat aatgaaatat tcagcacaag ttaaaacaac
    46201 agaattgaac gaaaaggggc tggctgtaga atctggctgg gtcactgttt atcaggttaa
    46261 tcaggtaacc cgtgaatacc tacaggcaaa ttatgagttc ctgatgcgcg gtgtcggggt
    46321 gtctgccgga agttatgttg atgaaccaaa aatgccagcg gaaggaaaag cactgtgccg
    46381 ctctgctgac ggaaaaagct gggagcacat tccagattat cgaggggagc gagtttacaa
    46441 cactgaaacc cgtcttgcgc attatgtgac gcaactgggg gaactgccaa gcgacgtaac
    46501 cttgctggct ccagcaacag agtttgacgc gtggaacggc aaaaaatggg tgacagatac
    46561 cgccgcgcag aaagtcgcag ttgcaaagtt ggcgcagcag caactcgcat cacgtaaaac
    46621 agcagccgca gcgcgcatta atgaactgac gtacgcagcc aatcttgata tcgcgactga
    46681 cgcagagaaa gcagcgttga tcgagtggca gcgatacgca gtgctattga gtcgcgtcga
    46741 tgttaatgct gctgctatcg agtggcctga acaaccagcg tgattacgca aaaaacgaca
    46801 ggcgcccagc gataatatcc aaagcgtctt cgagcgtagg cactgggtct atatgaatcg
    46861 ctggcgcgtc agtttcgcct acgcgtacag cgacatagtg accagagtct tcgattactg
    46921 cgtatgaatt tatcgggcaa tcagtcagca tgtcgctgtc gccgagtacg cagattgtcg
    46981 ttccgttata gttaactatt tccatttttc acacccgaaa ttttcccgtc catgtccgaa
    47041 aaatatagca tgtgtttgat ttaaaaggat aggaaaggac ggtgtttttg atgggttttt
    47101 aatctgtcta tttggtttaa ttgttatttt ttcagcatgt tagttatttt atggcgacta
    47161 aaggaatcgt gttcggtctt ttttttgatg tatcggttgg cgatttttgc caattaagat
    47221 gtcggcacga ggtgagtttc gtctctgcgg gccttttaaa ggtttttaaa aataaacgct
    47281 tgctaaagat atttatacat gcgttaatga gtggtcggtt tgattcgcag acctaaaaag
    47341 cagtttagta aagcagttct catttccaag tgttatccat agatatccct tcttttgagc
    47401 ctccttatcg ttgctaatta aattctgtgc acaggcccta tttgccggaa ggcactatac
    47461 aaattaaggt aatatttatg tctaacaaaa tgactggttt agtaaaatgg tttgacgctg
    47521 gtaaaggttt tggtttcatt actcctgaca acggcagcaa agatgtattc gtacatttct
    47581 ctgctattca gagcaacgat ttcaaaacgc tggacgaagg ccaaaaggtt gagttcacca
    47641 tcgaaaacgg ccagaaaggc ccagcagctg gcaacgttgt cgcgctgtaa
//
