# Supplementary material for: May the Phage be With You? Prophage-Like Elements in the Genomes of Soft Rot Pectobacteriaceae: Pectobacterium spp. and Dickeya spp
Source: Front Microbiol. 2019 Feb 14;10:138. doi: 10.3389/fmicb.2019.00138 (PMC6385640; doi:10.3389/fmicb.2019.00138)
Supplement: Supplementary file 2 [file Data_Sheet_2.ZIP › Supplementary_prophagesGENBANK_files/Genbank FILES _SRP_prophages/phiPpa1.gb]

LOCUS       Exported               72383 bp ds-DNA     linear   UNK 02-AUG-2018
DEFINITION  phiPpa1.
ACCESSION   .
VERSION     .
KEYWORDS    .
SOURCE      phiPpa1
  ORGANISM  phiPpa1
REFERENCE   1  (bases 1 to 72383)
  AUTHORS   .
  TITLE     Direct Submission
  JOURNAL   Exported Aug 2, 2018 from SnapGene Viewer 4.2.3
            http://www.snapgene.com
FEATURES             Location/Qualifiers
     source          1..72383
                     /organism="prophage phiPpa1"
                     /mol_type="genomic DNA"
                     /note="/genome_id=6666666.356863"
                     /note="/genome_md5="
                     /note="/project=robertczajkowski_6666666"
                     /db_xref="taxon:6666666"
     CDS             complement(92..364)
                     /codon_start=1
                     /product="hypothetical protein"
                     /label=hypothetical protein
                     /db_xref="SEED:fig|6666666.356863.peg.1"
                     /translation="MSNNTVGGWSAFRDVDNADKSFFESVLNGLVGMKYTPIFVATQIV
                     SGTNYSFLSKAIGAFPNAQLNMTLVRIYKPLSGEAHITSIEKIEP"
     CDS             679..1161
                     /codon_start=1
                     /product="hypothetical protein"
                     /label=hypothetical protein
                     /db_xref="SEED:fig|6666666.356863.peg.2"
                     /translation="MRNVKLDNSDLLAYFDTVQKLKKQPSMDEYRKEYFRLREDDSVPQ
                     YKLREYYSAHTELRRLDRKRKSLMDFFIEELNPISFSTANTSAKSSGDLDKFYESRLYG
                     KAIVEKSDEEIVSLIIKQRTEAALEFQRSVEQSLEQLSSISSDLGTLNTKRRKMAI"
     CDS             complement(1168..1869)
                     /codon_start=1
                     /product="Transcriptional regulator, ArsR family"
                     /label=Transcriptional regulator, ArsR family
                     /db_xref="SEED:fig|6666666.356863.peg.3"
                     /db_xref="GO:0003700"
                     /db_xref="GO:0005622"
                     /translation="MLKYAKLTDRGDALEHSMAALAAAISDPSRVKMLCALMDGRAWTA
                     TELSVVADIAASTASAHLSRLVSEGLITCLSQGRHRYYRLAGTDIAGLIENMMGVSWRS
                     TSSAKINTPSSLRVARTCYDHLAGEISVHIYDFMIAEGWVTSDGASMTPSGQEQFRELG
                     IMSKPKTRRKTCCGCLDWSERRFHLGGEAGAAFFTHCEQKGWLTRIPGFREVTITASGK
                     MAFKKLFGLNT"
     CDS             complement(1871..2263)
                     /codon_start=1
                     /product="FIG00450350: hypothetical protein"
                     /label=FIG00450350: hypothetical protein
                     /db_xref="SEED:fig|6666666.356863.peg.4"
                     /translation="MYDIHVVLKNTPGELAALGAVLGQNGIGLEGGGVFTIGDKAHAHF
                     LVEKGDAAKAVLENAGFQVESVCRPLIRKLKQERPGELGEIAATLAEKGINILCQYSDH
                     ANQLILVTDNDRVASKTTEKWAVVPE"
     CDS             complement(2256..2579)
                     /codon_start=1
                     /product="Antibiotic biosynthesis monooxygenase"
                     /label=Antibiotic biosynthesis monooxygenase
                     /db_xref="SEED:fig|6666666.356863.peg.5"
                     /translation="MIAVLFEADVVPTQQVRYLQLAAELKPLLADIDGFISIERFQSLT
                     TSEKILSLSWWRDEEAILLWKQNVLHKAAQAEGQKSIFSFYRIRIAHALRDYSSETRGQ
                     TDV"
     CDS             complement(2698..2940)
                     /codon_start=1
                     /product="hypothetical protein"
                     /label=hypothetical protein
                     /db_xref="SEED:fig|6666666.356863.peg.6"
                     /translation="MIDEFHVMFMYRNIQAEAATTDIKTLNQLLKKFRKVVAERREEYY
                     QEIGEKKAQKLRAKRLQLLLEKMGCDRVSPEDLYH"
     CDS             complement(3011..3361)
                     /codon_start=1
                     /product="hypothetical protein"
                     /label=hypothetical protein
                     /db_xref="SEED:fig|6666666.356863.peg.7"
                     /translation="MKEIVLNSYDKTKNVLVANILQGFCDEIYNIHESDPETAIHIMSW
                     GELSEVIYDVIITREIMKYSIKNDASGINKNDLKDEILHWHLEHIIELVFKNINQDENQ
                     DPVYWKLKVTVV"
     CDS             complement(3401..3637)
                     /codon_start=1
                     /product="hypothetical protein"
                     /label=hypothetical protein
                     /db_xref="SEED:fig|6666666.356863.peg.8"
                     /translation="MTNKMSVVVSVLCDGPPEVMNTIQERFEIFVAITGYSVEEIIDDK
                     NILEELNRFINNELVDDLWLEYSCVITNIGYNN"
     CDS             complement(3717..4013)
                     /codon_start=1
                     /product="hypothetical protein"
                     /label=hypothetical protein
                     /db_xref="SEED:fig|6666666.356863.peg.9"
                     /translation="MSKEKISINKSTELFYELACRSFAASWNMFMEVNGDGDANDYLDA
                     PDFMSPFIIHVIDHIQNNFERFTAQEGNSGDINQVNFELVAAMLVEYSENFRK"
     CDS             complement(4094..4408)
                     /codon_start=1
                     /product="hypothetical protein"
                     /label=hypothetical protein
                     /db_xref="SEED:fig|6666666.356863.peg.10"
                     /translation="MNNQEMESIKELSTKTFYAMTKYLYVAGMLIYKDQGDHELVASIM
                     LDNNRTESYLSHVKDYLAKRFDGHMEEAGKRERLIYVDMDKVILEMKSVHIKALLFGMS
                     "
     CDS             complement(4441..4659)
                     /codon_start=1
                     /product="FIG033266: Phage DNA binding protein"
                     /label=FIG033266: Phage DNA binding protein
                     /db_xref="SEED:fig|6666666.356863.peg.11"
                     /translation="MVQIVVNKKQRLIRLPEVIRRTGFGKTWIYTLIKAGRFPSQVKTG
                     LRSIAFIESEIDTWIEKIISDSRPVSE"
     CDS             complement(4847..5710)
                     /codon_start=1
                     /product="hypothetical protein"
                     /label=hypothetical protein
                     /db_xref="SEED:fig|6666666.356863.peg.12"
                     /translation="MPKAEIVEALSEWFDVSRYDVLKDLTLEQIYAELERRIFAYKARQ
                     QWETAGEENQMLAIYHDAQIRSGKVIHETKWVSDSHMLAHSYAVRPMTRNSLFNYGRAM
                     YRLENSDQKDDVSVSSEYISEYLKQGGLNPTNKMLIEIDLDEASSDDLAEHLKVLITQW
                     QKHLKAPKPPEKDFRFGHKTFQKILDYKIIPLMDLIGWEQLNNQKIPYPVLAGILHTDM
                     RYARGSEQIKDTDYPLAYDFLNNDNYFKSLNDFFIKNMHVKSSDILAVIGMNDKPEDKK
                     KTRDSR"
     CDS             6157..7428
                     /codon_start=1
                     /product="hypothetical protein"
                     /label=hypothetical protein
                     /db_xref="SEED:fig|6666666.356863.peg.13"
                     /translation="MSTATDFKTLLDNIKIDNAGQISKRYGRITKVLNQYFYDIDSKTA
                     NSLQVGSYGRFTGIRGISDLDMLYFLPATEWPRFRDKQSYLLQVVKTEIKKAYKNTDIR
                     GDGQVVVVKFKNQEVEIVPVFCNEDGSFKYPDTHDGGSWKICNPRAEMSSFRILNDDRK
                     GHLRRLSKMVRAWKTRHEVEISGFLIDTLCYKFFSNLSEYNDKSFKSYDQLSLDFFTFL
                     ENEGDRAFYYAPGSHSKVIVKKSFNKVAKLTREYCEEALSATSENSRRVAWKKIFGRPF
                     PNSTTKSLSAVNVSEQYIEDQYELNLYGHVSIECEIRKNNLLEALLSNLLGEGHDISTN
                     RKLRFYVDEINNIPHPYKIKWKIKNIGDEAERRGNFRGEILDDEGYSERFETADFSGPH
                     FVECYVIHGNQVVARDKIDVPIHN"
     CDS             7481..8041
                     /codon_start=1
                     /product="hypothetical protein"
                     /label=hypothetical protein
                     /db_xref="SEED:fig|6666666.356863.peg.14"
                     /translation="MVNRMDRNILEGQLRECYGRVVYTHKTHEKCADILQKKLSCMKNL
                     QLVLLAITTGSFIATVVGDAKIGAIIGSILSAILLFLNSYLKDYDLGTIAQKHRQAAGE
                     MWLIRERYLSLLIDLKMQTKSIEEVLKERDALMIELSAIYVGAPSTNYRAYTMAQKALK
                     ELEDMTFADEEIDKFLPTELKRK"
     CDS             complement(8334..8480)
                     /codon_start=1
                     /product="hypothetical protein"
                     /label=hypothetical protein
                     /db_xref="SEED:fig|6666666.356863.peg.15"
                     /translation="MELIQVKAEFTMRENLYPVEHLQQNLRYLHAMRQAALRADCVETL
                     TKN"
     CDS             8931..10202
                     /codon_start=1
                     /product="Integrase"
                     /label=Integrase
                     /db_xref="SEED:fig|6666666.356863.peg.16"
                     /translation="MSLNDSKIRKLKPSAKSFKVSDSHGLYLLVNSSGSRLWYLKYRIN
                     RKESRLGLGAYPDVSLADARQQRDGIRKLLAQNINPAQQRSAERTTSSPEKTFKHVALE
                     WHKSNRSWSENHAARLLASMNNHIFPIIGHLPVTELKTRHFIDLLKGIEKKGLLEVTAR
                     TRQHMCNIMRHAVHQELIENNPAANLDGIIAPPVKRHYPALPLERLPALLASIEDYKQG
                     RELTRLAVSLTLHLFIRSSELRFARWSEIDFRNKIWTIPATREAIPGVRYSGRGAKMRT
                     PHIVPLSRQSIAILKQIREISGHQELIFPGDHNPYKPMCENTVNKALRVMGYDTKDEIC
                     GHGFRAMACSALMESGLWAQDAVERQMSHQERNSVRAAYIHKAEYLDARKAMMQWWSDY
                     LDTCREAYVPRISRGKVIALRLNN"
     CDS             10382..10501
                     /codon_start=1
                     /product="hypothetical protein"
                     /label=hypothetical protein
                     /db_xref="SEED:fig|6666666.356863.peg.17"
                     /translation="MQKMAGQDHLPGWGQSSAGFDLFQRKDNLFFGIMDLFHG"
     tRNA            complement(10888..10974)
                     /product="tRNA-Ser-CGA"
                     /note="/transl_table=11"
                     /db_xref="SEED:fig|6666666.356863.rna.1"
     CDS             11055..11852
                     /codon_start=1
                     /product="Inner membrane protein"
                     /label=Inner membrane protein
                     /db_xref="SEED:fig|6666666.356863.peg.18"
                     /translation="MIKWPWKNTQPQVQTQENWQGAISIPLLAPLNDEELQQLVTLAEQ
                     FLKQKRLIPLQELVLTEIMQQRIALLFSLPVLSLGIDALDGFHEVLVYPGPFIVEEEWQ
                     DDIGLVHKGKIVQSGQSWDQGPIVLNWQEVQDSFDLSGFNLIIHEVAHKLDIRSSGEAT
                     GVPLIPLRDIAAWEQQLHGAMDALQEEIDLVGEDAASMDPYAVHDPAECFAVLSEYFFS
                     APELLEERFPALYRCFQKFYRQDPLTRLKNWQNSINYHAPSIY"
     tRNA            11963..12035
                     /product="tRNA-Asn-GTT"
                     /note="/transl_table=11"
                     /db_xref="SEED:fig|6666666.356863.rna.2"
     CDS             12487..12690
                     /codon_start=1
                     /product="hypothetical protein"
                     /label=hypothetical protein
                     /db_xref="SEED:fig|6666666.356863.peg.19"
                     /translation="MKRISPERKAAALAKLLPPYNMTVTAVAPMEGISEATLYYWRNKA
                     KAEEIPVPGRDLNPHSANAEGF"
     CDS             12708..12821
                     /codon_start=1
                     /product="hypothetical protein"
                     /label=hypothetical protein
                     /db_xref="SEED:fig|6666666.356863.peg.20"
                     /translation="MKTISYCNSTDCRFWLVLFIFLSYHSAATFTVAFFIP"
     CDS             complement(12811..13500)
                     /codon_start=1
                     /product="5-methylcytosine-specific restriction enzyme A 
                     (EC 3.1.21.-)"
                     /label=5-methylcytosine-specific restriction enzyme A
                     /db_xref="SEED:fig|6666666.356863.peg.21"
                     /translation="MEKQQNTGWSDEELRASVEAYVEMKRFHQVGLTFIKKNYYDSLAA
                     RFPRTAKSFEFRMQNISFVYQEMGRDWLPGLTPATNVGAKIFPRLKQFIDDLDPIGEQT
                     EKQFEAQVSALRKKGVKSKPTGNSNPPKKTTQTTSVVRDPEVKAYVLQEAKGVCEYCRN
                     PAPFMQADGLPFLEVHHLKYLANGGSDTVENAAALCPNCHRAMHYAVNKNALLEKLYLA
                     IPRLVRE"
     CDS             complement(13502..14512)
                     /codon_start=1
                     /product="Phage integrase"
                     /label=Phage integrase
                     /db_xref="SEED:fig|6666666.356863.peg.22"
                     /translation="MAVRKLPTGKWLSETYPKGRTGKRLRKQFVSKGEALSYERQLKFV
                     GISIDTSAAEDAGQNLSELVQRWFDMHGRSLADGEGRLRKLELLCTNLGDPIASLFTKA
                     DFAEYRKQRLNGKFGRFDKPVKESTINREHSYLSAVFNELKRLGEWQGDNPLDGIRQYK
                     ESDSELAFLYHDDIRLILSECDASSNPDLGSVVRICLATGARWSEAQELKQSQLVPYRV
                     TYINTKGKRNRTVPISPELYQRLPRRRGQLFSPCYDAFRQALKRSQIDLPEGQLTHVLR
                     HTFASHFMMNGGNILVLKDILGHTSIQMTMRYAHFAPDHLDAAVTLNPYDRLEMV"
     CDS             complement(14595..15443)
                     /codon_start=1
                     /product="putative orphan protein"
                     /label=putative orphan protein
                     /db_xref="SEED:fig|6666666.356863.peg.23"
                     /translation="MTSSLTYSVNALNILHAFHSGNKIVFVEGDSDKRFWDGLYNSFGI
                     NNITTKCVNGCKVIDEYIEKIKEGATGVYVARDRDYKYLFDEPEDLINVMFSYGYSIEN
                     TYYTDDILKGIVKSLAAKDIPDDYISIDRDIIKPNINLFFKLVSFDYALFSQGVGEKIM
                     GDSSFRFLEKQDGFQLCKKIVEPIILNAKGKIDYSIYLSYRKKLIKYKGEPLICVRGHF
                     LTGMISNYIKEKVKNASGSKITYDNKLLESIFSNLMNINLRDDVHPHKEYYYHQVSILK
                     K"
     CDS             complement(15440..16786)
                     /codon_start=1
                     /product="putative ABC transporter ATP-binding protein"
                     /label=putative ABC transporter ATP-binding protein
                     /db_xref="SEED:fig|6666666.356863.peg.24"
                     /translation="MVTFMYKISSVRIYGLWGEKTLNFKFDDDVNILIGINGTGKTTVI
                     NILYSILNAKSEIISKCNFDKITIHLEDEGNPFSTKVIYAARFGKNEDGYDKEVYYDID
                     GEGYLLVPDESKRLIYNRTKDVSPAKASIVSEEQLNKIIKEIINVVGISTNRSKIGDEN
                     SNDDAFFSDFLKSSVVSSKNIDTILEEQIENLKSYQIEKNNKIKEMSIKYQKDILVETL
                     IEVDAKFNRRDLKYKSENFVIKDKSNELIQAYKNLGVIENYNENKYRKKINDNLQTVNN
                     VLKNLKDREFKGIMIQDVVVLSLYEKLNQVVDLSERFKIETENELSSLRDFTKIINDDF
                     YINKSVEINYSGDLKIYLEDKKEINVKDLSSGEKQILTILIESLLQRGMPNIFIADEPE
                     ISLHISWQSKIISSIKKLNKKAQVIIATHSPEVAGSYLSKIIDMKEAAE"
     CDS             complement(16802..17479)
                     /codon_start=1
                     /product="Repressor protein CI"
                     /label=Repressor protein CI
                     /db_xref="SEED:fig|6666666.356863.peg.25"
                     /translation="MLLVGIICYLLAKVMSKLISVNQINWNLISMKFDGGKGVVERILK
                     AYGFTMQKQLHDHLDVGNGTVSTWIKREYFPGEVVIRCALETGASLTWLATGEGEMFQD
                     LAKPAESAINSAYISLKKIRIVGGRLQDAGTWIADGTLLDDSVSEPAFIEKGNNAWIAD
                     MSVTQVSNGRWLLDIDGDVDVYDVARIPGNRIQVSGNATKFECSIDDVKGAGMVVITVE
                     KNI"
     CDS             17507..17719
                     /codon_start=1
                     /product="hypothetical protein"
                     /label=hypothetical protein
                     /db_xref="SEED:fig|6666666.356863.peg.26"
                     /translation="MKTPLSITLATPYVTLSEFSRISGLPIKTCYQWVHQGKLPIRAKN
                     AKNERTMINLLALTKEAEWEARLGA"
     CDS             17765..18274
                     /codon_start=1
                     /product="Transcriptional regulator"
                     /label=Transcriptional regulator
                     /db_xref="SEED:fig|6666666.356863.peg.27"
                     /translation="MFDYQIAKHPHYANACRAFATRHNLVELAEMVGMNPQMLRNKLNP
                     EQPHRLTCDDLLTITDASEDSTLIDGLLAQLNCLPAVPVNEAKTERLTTYVLQATAAVG
                     AVAAESLSTERMSQTRRNSFMESINSGIRYLSLVGLTLQTRIQANPAMASTVDALSGIG
                     ASLNVG"
     CDS             complement(18324..18587)
                     /codon_start=1
                     /product="hypothetical protein"
                     /label=hypothetical protein
                     /db_xref="SEED:fig|6666666.356863.peg.28"
                     /translation="MCINIVISCKSRSEWNWRIVDKSGNTVVNSPRIFENRPLCIEDAE
                     RFLSLIDDAKFYDNAGVPIDQMHLSDSSRTQRGTLIKTHPAN"
     CDS             18580..18819
                     /codon_start=1
                     /product="hypothetical protein"
                     /label=hypothetical protein
                     /db_xref="SEED:fig|6666666.356863.peg.29"
                     /translation="MHIFNDPSESQKYSESIHCAANNLLDAFKGGDTRIALEILDWMKD
                     AVIANSSVVATEDAICVNASSPSFPLKVISIKRG"
     CDS             18816..18944
                     /codon_start=1
                     /product="hypothetical protein"
                     /label=hypothetical protein
                     /db_xref="SEED:fig|6666666.356863.peg.30"
                     /translation="MIVFGDSILPQDHAPGMAKTRHLFATVYQWAITNRQLNQQLE"
     CDS             18950..19384
                     /codon_start=1
                     /product="Tellurite resistance protein TerB"
                     /label=Tellurite resistance protein TerB
                     /db_xref="SEED:fig|6666666.356863.peg.31"
                     /translation="MSFFGFGKKVAAAKVELKKVENRDLMEAIVGGCLLVAAADGEIEK
                     EETDKLDKLLRSNPQLGHYGNEITQTISRFTEQLQAGFRVGRMNILREIDDIKNTPKDA
                     EEVFVNMLTIAEADGEIEPEEQKVLEEVGRRLGLRIEDYL"
     CDS             19384..19545
                     /codon_start=1
                     /product="hypothetical protein"
                     /label=hypothetical protein
                     /db_xref="SEED:fig|6666666.356863.peg.32"
                     /translation="MNTLRLAGVLLFAFMGVAVDFSSYLLSVISDALFISALVFIVWSP
                     LMTGVEKK"
     CDS             19657..20295
                     /codon_start=1
                     /product="GpB"
                     /label=GpB
                     /db_xref="SEED:fig|6666666.356863.peg.33"
                     /translation="MAPDGDKARLYDHPRQRPSGDHHPYPLGKLCPAGYPFYQVSDTGE
                     SMTAFTVSSMQNLPAGLRNVIGKHFADSRWRETCAYYNSLHERDRLTICFHAQMKKRHT
                     VYRLEEMPTAEREQIVCAIDEMRQAFSKGRSRGVNISTFLSWLSVSERRTLFMHAGLTE
                     KEFNQPYWRIDDNSCQWRQPILRALNELASLSEAAPEILTAIKPEEYLS"
     CDS             20364..20606
                     /codon_start=1
                     /product="Phage protein"
                     /label=Phage protein
                     /db_xref="SEED:fig|6666666.356863.peg.34"
                     /translation="MYKTVGQAMHRKAENEGIQLMLSQARTEAKADAHTSFSSRLDKLA
                     THASINELSRVEIIELLRQESEAFNNSGSDIKAVM"
     CDS             20606..20914
                     /codon_start=1
                     /product="hypothetical protein"
                     /label=hypothetical protein
                     /db_xref="SEED:fig|6666666.356863.peg.35"
                     /translation="MENPNYNRVDINGNYAIAKVGYDFGLGEIKCGKEDGDQPYLSTLA
                     VYQNPVSLINDFVHRAIATEIWRGNVTDTKKLLTESKRFAALCQSAFDQLNNDKGQE"
     CDS             20914..21138
                     /codon_start=1
                     /product="Phage protein"
                     /label=Phage protein
                     /db_xref="SEED:fig|6666666.356863.peg.36"
                     /translation="MPDAMDMVQQRQQDTLDHQIANARNVQRGVSAFECEDCDQPIPEA
                     RRAAIDGVTRCATCQGIHELKSKHYRGGL"
     CDS             21192..21329
                     /codon_start=1
                     /product="hypothetical protein"
                     /label=hypothetical protein
                     /db_xref="SEED:fig|6666666.356863.peg.37"
                     /translation="MAFYFPSIVESGAFFVTMKDGKQYRATCLRENTTAHRGVCSGATL
                     "
     CDS             21308..23623
                     /codon_start=1
                     /product="Putative replication protein"
                     /label=Putative replication protein
                     /db_xref="SEED:fig|6666666.356863.peg.38"
                     /translation="MLRRYAMNHTHRGRSAPTPPPPFPGSTRDTFVGAYSWNAPRPAIV
                     PEERQLTREEWTQGQAVLAKINQQPHFLREICLNRYVYLKKNKGQLSANRFLVNSFMQR
                     MWPRIEAINARHAMNRNASERFLSESDAYQTLSGMNDKALGRLAARISGQIFSAYEELS
                     DAMKAERGGQPDALFTDAVQAELFGHVASMARAFNITPLFWKNYRKGTLDIRKAIASVS
                     RLINEEWWTRQLKAQRTRWREALMIAVGQVSKKASPYASKMAIRDVLARRLANMDYLKN
                     CELENVATGERIDLIDKVMASISNPEIRRMELMSTIAGIERYASEQRDVGMFITITTPS
                     KYHPTRTIGKRDNEKVQFNRKWDKEAFTPKDGQRYLVKIWGKMRTAFKDNDLKVYGMRV
                     VEPHHDGTPHWHMMLFCKRAHRQSVIDIMRRYALKEDGDERGAATYRFECKHLNKGGAA
                     GYIAKYIAKNIDGYALDGEIDKDTGKPLRDMAVAVTAWASTWRIPQFKPIGIPTMGAYR
                     ECRSGTLRSVNLTDQFDEQVEAVRCAADAGDFSAYMAAQGGANVSRELQTVRVARRVSD
                     KLNEYDEEVQKVVGIFAPHLGAGHVFETRTTEWRIVSKAVDLDPLTLKSAPGAPRSPVN
                     NCGLGSQRSGENVKTQAENSGIATTSETDNTPIDWNDDAAVRALGMRLREQSARKNHKQ
                     RDFNPNTLRDPSPSARLTGEERERIPRIQRDLFQRGITTQRWELEALARGAKMKIDGEL
                     ISYPTADEWPGFSEHFQE"
     CDS             complement(23665..23793)
                     /codon_start=1
                     /product="hypothetical protein"
                     /label=hypothetical protein
                     /db_xref="SEED:fig|6666666.356863.peg.39"
                     /translation="MRFLRFPYYSFLLFLYTVFFKMKRQSMNYSTCCILKIKLFYW"
     CDS             complement(23907..24161)
                     /codon_start=1
                     /product="hypothetical protein"
                     /label=hypothetical protein
                     /db_xref="SEED:fig|6666666.356863.peg.40"
                     /translation="MRDEPRLNALARNAIPATPARFVCRFSCTRTIQRDPCRTGGYKVF
                     ELWDPACKFMHIDAMSTTYFMALIFGAVNSSWTHQATCF"
     CDS             24124..24246
                     /codon_start=1
                     /product="hypothetical protein"
                     /label=hypothetical protein
                     /db_xref="SEED:fig|6666666.356863.peg.41"
                     /translation="MRARAFRRGSSRTDAPRCEMFCFDIMHWVGFLLKRVKRDW"
     CDS             24379..24837
                     /codon_start=1
                     /product="putative membrane protein"
                     /label=putative membrane protein
                     /db_xref="SEED:fig|6666666.356863.peg.42"
                     /translation="MDTIEEIGGTYFYGGLTNLSAGELFFWIMIDVTAEHFTGAKDVIA
                     AAAVYSGQNNIHVSGKFANATPGTSLASKYSRKLLKGYQLPVRLPTFVSAPQNPFKIKK
                     IMTLKLSTFVGRTIPVIGWLVLAVDVSLIGYEATTRYNRIASKEDRLW"
     CDS             24831..25136
                     /codon_start=1
                     /product="hypothetical protein"
                     /label=hypothetical protein
                     /db_xref="SEED:fig|6666666.356863.peg.43"
                     /translation="MVNQGQDVEKEVFKLVETYNGRSLFSRKRFELRHDTDLNEDFRMA
                     PEDAYELMESYVDKFDINPKTIHFERYFPESFSDPHDPLTIQLLIDSANAGRWLGK"
     CDS             complement(25170..26195)
                     /codon_start=1
                     /product="Portal vertex protein"
                     /label=Portal vertex protein
                     /db_xref="SEED:fig|6666666.356863.peg.44"
                     /translation="MKKRKYRKSQSAPVSQAQPIEAFTFGEPSAVLDRRDILDYAECIH
                     NGKWIEPPINFSGLAKSLRAAVHHSSPIYVKRNILVSTFIPNPLLSQQDFSRFVLDYLV
                     FGNAFLEKRLNRTGGILRLDSSPAKYTRRGVEEDVYWFVQSFKEPHRFEPGSVFHLLEP
                     DINQEMYGLPEYISSLNSAWLNESATLFRRKYYQNGAHAGYIMYVTDAAQSGTDVDKLR
                     AAMNGTKGLGNFKNLFFYAPNGKPDGIKIVPLSEVATKDDFFNIKNASRDDLLSAHRVP
                     PQMMGIIPNNTGGFGDVEKASQVFVRNELTPLQERMKEVNNYVGEQVISFKPYSLEIAD
                     K"
     CDS             complement(26192..27961)
                     /codon_start=1
                     /product="Phage terminase, ATPase subunit"
                     /label=Phage terminase, ATPase subunit
                     /db_xref="SEED:fig|6666666.356863.peg.45"
                     /translation="MNTAIDTTIISDPRRQAALLYWQGFSVRQIGEMLNQKTPTVQSWK
                     QRDGWDAIAPVSRVEASLEARLIQLIMKTKKEGHDYKEIDLLGRQIERLARVNRYSQTG
                     NEADLNPNVRNRNKGDRKAPEKNHFSESAIEKLNDIFLSEIFEYQRGWHQAGLQHRIRN
                     ILKSRQIGATFYFAREALIDALTTGRNQIFLSASKAQAHVFKNYIIDFARLVDVDLKGD
                     PMVLPNGARLFFLGTNIRTAQSYTGNLYLDEYFWIPKFQELRKVASGMSLHKKWRSTYF
                     STPSSLAHSAYPFWSGELFNKGRSNKADHLHLDLSHANLSGGVLCGDGQWRQIVTVEDA
                     LSGGCNLFDLDQLTLEYSPAEYQNLLMCEFVDDKASVFPFEELQRCMVDALEEWEDFNP
                     YALRPFAYKPVWIGYDPSHTGDSAGCVVLAPPQAPGGKFRILERFQWKGMDFAAQAEAI
                     KLLTEKYIVEYIGIDATGIGQGVYQLVRGFFPAAREIKYSPEIKTAMVLKAKDTITSGR
                     LEYDTSHTDITQSFMAIRKTMTASGNRTTYEASRSEEISHADVAWATMHALLNEPLTAI
                     NGHVPVSILDFNE"
     CDS             28038..28955
                     /codon_start=1
                     /product="Phage capsid scaffolding protein # Fam Scf032"
                     /label=Phage capsid scaffolding protein # Fam Scf032
                     /db_xref="SEED:fig|6666666.356863.peg.46"
                     /translation="MAWPVVTPDTRPDFPQITDEKMAKKVSKFFRVGVEGDTCDGRVID
                     ANDIQNMAETFDPRVYGCRINLEHLKGLLPDSPFRRYGDVVELKSETIDDDSAISGKLA
                     LFAKITPTDELVAMNEARQKIYTSMEIQPNFANTGKAYLVGLAVTDDPASLGTEMLEFS
                     AKAKLNPLATRKFSPENLFSVATEVTLEFEDLPDVEPTLLSRITALFGRKQSSDDARFN
                     DVHEAVAEVAGQVQTNADSVEQRFTQLEQRQQQDIATLTQKLSASEQQLTDLKATLDGT
                     ESLSQTRRPAATGGDGEATLLTNC"
     CDS             29003..30118
                     /codon_start=1
                     /product="Phage major capsid protein #Fam0066"
                     /label=Phage major capsid protein #Fam0066
                     /db_xref="SEED:fig|6666666.356863.peg.47"
                     /translation="MRKETRFKFNAYLTQLAAINGVEVETLSKKFSVEPSVTQSLMDVV
                     QESSDFLTRINIVPVAELTGEKIGLGVSGSVASTTDTSNGDERETADLLSLEARQYKCE
                     QMNFDFHIRYNTLDLWARFQDFQLRLRNAIAKRQSLDYIMAGWHGVKRAATSDRAKYPL
                     LQDVAVGWLQKYRNESAKRVMSKVVGEDGAVISEKIRVGENGDYVSLDALVMDATNIMI
                     DEWHQEDPDLVVICGRQLLSDKYFPLVNKQQENSEILAADVIISQKRIGNLPAVRVPYF
                     PANALMITRLDNLSIYYMDDSHRRHIEEVAKRDRIENYESIKQDYVVEDYGCGCVIENI
                     QLGKFPKPPEAEKAAEPAASGTETSTDNTGV"
     CDS             30122..30781
                     /codon_start=1
                     /product="Phage terminase, endonuclease subunit"
                     /label=Phage terminase, endonuclease subunit
                     /db_xref="SEED:fig|6666666.356863.peg.48"
                     /translation="MLSPAQRHMMRVSAAEASQRENDPLRQATGYEQMLFRLAADKRTL
                     KQVRSIERKAEMKSGLLPSYAPWVAGVLANGRGAQDAVLMTVMVWKLDAGDVPGALEIA
                     RYALQHKLVMPEGYTRPTPYLLAEEVADAATRAHTAGQAVNIDLLIDTLTLTDAEDMPD
                     QVRAKLHKIIGLILRSGKPEHALFHLKRAFQLDSRSGVKKDIERLETALRKAAASR"
     CDS             30882..31376
                     /codon_start=1
                     /product="Phage head completion-stabilization protein"
                     /label=Phage head completion-stabilization protein
                     /db_xref="SEED:fig|6666666.356863.peg.49"
                     /translation="MIFPAKAELRPDAVVIPVPVQQDAVIKNTFFWPDVEPGTLRILMR
                     LENTVTPERLRHAALTAIAEVNAELFEYRKAQWAAGFTTLAEVPAEQLDGQSEKHHHYL
                     RAVSAITTATLYERYRGYDASAKGDRKADALDGTIDELWRDARWAISQLQDAPRCIIGH
                     I"
     CDS             31376..31579
                     /codon_start=1
                     /product="Phage tail completion protein"
                     /label=Phage tail completion protein
                     /db_xref="SEED:fig|6666666.356863.peg.50"
                     /translation="MNVIAQQGDTLDALCYRHYGRTQGAVESVLGANPGLAEFGAMLPH
                     GTPVTLPDIAAASVAETVSLWD"
     CDS             31570..31791
                     /codon_start=1
                     /product="hypothetical protein"
                     /label=hypothetical protein
                     /db_xref="SEED:fig|6666666.356863.peg.51"
                     /translation="MGLNMERITSFIAYWISVALAFFGAMTPQDFAAYFGALGVVFTVG
                     VNWYYRRKSYQLLKTIDSPREVIHEITR"
     CDS             31775..32284
                     /codon_start=1
                     /product="Phage lysin (EC 3.2.1.17) # Phage lysozyme or 
                     muramidase (EC 3.2.1.17)"
                     /EC_number="3.2.1.17"
                     /label=Phage lysin
                     /db_xref="SEED:fig|6666666.356863.peg.52"
                     /translation="MKSLVKRCVIATVLALAALVPDFSLLKTSPQGLALIADLEGCRLS
                     PYQCSANVWTNGIGHTAGVVPGKTITEREAAVNLVADVLRVEKALARCVAVNMPQAVYD
                     AIVSFAFNVGVGAACRSTLAFFINKGQWRNACDQLLRWVYVNGEVSRGIETRRQRERAV
                     CLKGAT"
     CDS             32281..32724
                     /codon_start=1
                     /product="Phage spanin Rz #LysB"
                     /label=Phage spanin Rz #LysB
                     /db_xref="SEED:fig|6666666.356863.peg.53"
                     /translation="MSTLTRVILVVAALFIVLLFVTKRQLSDAKKLINEQSETLVKQSL
                     ELLVRDGVIDALQSSAIRNEQAQAELRKKLSQAGQLAASRDKKITRLLNENADLRRWYG
                     TALPDDIKRLHRRPTFGNPDAYLRWLSESGELPDTGQQPGNQR"
     CDS             32678..32851
                     /codon_start=1
                     /product="Phage outer membrane lipoprotein Rz1 #LysC"
                     /label=Phage outer membrane lipoprotein Rz1 #LysC
                     /db_xref="SEED:fig|6666666.356863.peg.54"
                     /translation="MESCPIPGSSPETNGDLSADNRQLENALVSCALQVETTKHCQEQH
                     DAETQQPAQRLK"
     CDS             32814..33269
                     /codon_start=1
                     /product="Phage tail protein # FIG072132 and FIG003673"
                     /label=Phage tail protein # FIG072132 and FIG003673
                     /db_xref="SEED:fig|6666666.356863.peg.55"
                     /translation="MLKPNSLRSALNDAVPVLKNNPDMLHVFIDSGAVVSTLAASLSFE
                     NQYTLNLVITDFTDDIDWLLVPIQVWLRENQPDITHDSQGFTYLADINDNGSCDISISL
                     KLTERVIVKEVDKALHVTHAPEPPLPVPVERPVSLYLSGELVSQWHE"
     CDS             33262..33711
                     /codon_start=1
                     /product="Phage tail completion protein"
                     /label=Phage tail completion protein
                     /db_xref="SEED:fig|6666666.356863.peg.56"
                     /translation="MNELKPFDDKLAALIASLSASGRRKLAGTVAKALRGSQQQHIKAQ
                     TAPDGTAYSPRKAQPIKSKKGRVKRQMFQKLRTAKYLKAKGTADAASVEFIGRVQRMAR
                     VHHYGLRDRPSRNGDDVQYEARPLLGFSDREIKEVEGLVIKHLSQ"
     CDS             complement(33740..34081)
                     /codon_start=1
                     /product="HigA protein (antitoxin to HigB)"
                     /label=HigA protein
                     /db_xref="SEED:fig|6666666.356863.peg.57"
                     /translation="MAQAQRKPTSVGDVLLYEYLEPTGLKINDLAEMLNVHRNTISALV
                     NNNRKLTVDMAFRLAKAFDTSVDFWLNLQNSVDVWEVENDARTQEEISRITTLENFLAQ
                     RDENVKDVA"
     CDS             complement(34093..34407)
                     /codon_start=1
                     /product="HigB toxin protein"
                     /label=HigB toxin protein
                     /db_xref="SEED:fig|6666666.356863.peg.58"
                     /translation="MQKMRSIHSFRDKWLEDFFMYGKSHKKIPADVVTSLSRKLDIINA
                     AVSAKDLRSPPGNRYENLNPPLGEYSSIRVNIQYRLIFKWVDGKAIDVYLDDHGYKNHK
                     "
     CDS             34595..35380
                     /codon_start=1
                     /product="Phage antirepressor protein"
                     /label=Phage antirepressor protein
                     /db_xref="SEED:fig|6666666.356863.peg.59"
                     /translation="MDALRGHTPINVGRATNTTPARGISSRFREAVSSLPTPPMVVFPR
                     KKYHEVIMTTQLSVESLSVVTYNNIPVVTTELLAQLYGTTAHSITKNHRSNVSRFICGK
                     HYYKITGKELVDLRVTYSNLQISAKTRSLILWTERGSARHAKILETDQAWDVFEWLEES
                     YFNPQAKAIQPLPQKPVHPCELEFYIPETPLIFNHIQTSQLNALFKSVEYLTMDFWPHM
                     QALFPTLDCKHGSAVNTVNLLMRLLKDKRAEADELSKQD"
     CDS             complement(35426..36400)
                     /codon_start=1
                     /product="hypothetical protein"
                     /label=hypothetical protein
                     /db_xref="SEED:fig|6666666.356863.peg.60"
                     /translation="MSPVCTRHRASAVLTWVTTPTRIRLRKRRRISVRVACVFMGEMLP
                     PRIKFDNKLTFNSQSHNIVRIFNLLFIGGTMFDVFSDSVDFYKNSLLFVTLVLCMVRVG
                     GVSFFIKLLLKAVRLDYSDNKIKSYEDDFFNAQLFRLFNGVNVKTTKDAELVCEALKTG
                     EIKRTDFRFSGFFGAVGVNRQDRMSVIAMSGLFVFCLACALSLMYFSPPMKFGYATYNY
                     RDDVVLISHENIYDPIEKKYFNKKDCDGNGERKEILKLSCEYLTTNEGEMKKELEKAID
                     NERTSSTIYLTLVAFFGSFGGIMFVGYMNFIKINKVICNLKNR"
     CDS             36399..36917
                     /codon_start=1
                     /product="Phage baseplate assembly protein V"
                     /label=Phage baseplate assembly protein V
                     /db_xref="SEED:fig|6666666.356863.peg.61"
                     /translation="MTTDWLNWLTRRAGRSRDWWAPSIGEQVLILSIGGELDTAFVLPG
                     IYSDANPAPSASADAYHVSFPDGAVIEYEPATGALTVSGIKTANITASESLIATAPLVT
                     VRASTRITLDTPEVVCTNKLITGTLEVQQGGEMRGNIQHSGGSLSSNGKVLHTHKHPGD
                     SGGITGAPL"
     CDS             36914..37258
                     /codon_start=1
                     /product="Phage baseplate assembly protein W"
                     /label=Phage baseplate assembly protein W
                     /db_xref="SEED:fig|6666666.356863.peg.62"
                     /translation="MTVRYLGMSRDSGQTLSDLEHIRQSVRDILITPVGSRVMRRDYGS
                     LLSALIDQPQNPAVKLQVMAACYMALLRWEPRITLTGINLTSAFDGQLYVDITGVLADS
                     NAVFLSVPVS"
     CDS             37263..38171
                     /codon_start=1
                     /product="Phage baseplate assembly protein J"
                     /label=Phage baseplate assembly protein J
                     /db_xref="SEED:fig|6666666.356863.peg.63"
                     /translation="MAMIDLSQLPAPAVVEELDYEAIYTERKAMLLSLYPEDQRAAVAR
                     TLTLESEPLVKLLQENAYRELLWRQRVNEAARAVMVAFAQGDDLDQLGANFSVSRLVIT
                     PADDSTLPPTPALMESDSDFRLRIQQSFEGLSVAGSVGAYQYHGRSADGRVADVSVISP
                     SPASVTVSVLSREGNGSASQELVAIVAAALNGEDVRPVADRVTVQSAAIVSYEIDATLY
                     LYPGPEQEPVRAAAEQKLKAYISAQHRLGRDIRRSAIYAALHVEGVQRVELTTPAADIV
                     LTDAQASYCSGYQLRVGGADE"
     CDS             38164..38775
                     /codon_start=1
                     /product="Tail protein I"
                     /label=Tail protein I
                     /db_xref="SEED:fig|6666666.356863.peg.64"
                     /translation="MSDSRLLPVGSSVLEVAAAKACAEITRVPVPLRLLLNPDTCPAHL
                     LPYLAWAFSVDRWDEAWPESVKRQVIRDAFFIHRHKGTIGALRRVVEPFGYLIRIIEWW
                     QNDGTPGTFRLDIGVQDSGITEETFYELERLIADAKPASRHLLGLNINLDTQGAAYVAA
                     TVYCGDDLTVYPYFPENITVSGLNVTGAALHLIDNMSVTA"
     CDS             38772..40607
                     /codon_start=1
                     /product="Phage tail fibers"
                     /label=Phage tail fibers
                     /db_xref="SEED:fig|6666666.356863.peg.65"
                     /translation="MSATYFALLTNIGAAKLANATTLGSRLNITRMAVGDGGGSLPVPN
                     PAQTTLINEKRRAALNTLSVAPKNPSQIIAEQVIPENEGGFWIREIGLFDDDGNLIAVA
                     NCPETYKPQLQEGSGRIQTVRMILIVSSTDAVTLKIDPAVVLATRGYVDEVIEAHEKSR
                     KHPDGTLTAKGFVQLSSATNSDSELLAATPKAVKAANDNANGRVPSGRKVNGKALTADI
                     ALTAGDVGAYTKAETDTKVSAATTAASNAATAASSANTNAESRVPLARKVNGKPLNADI
                     TLGAGDVGAYTKLETDTRVTAATTAANNAATAATNANTNANGRVPSGRTVNGKALSADI
                     ALGAGDVGAYTKTETDTRVTAATTAANNAATAATNANTNANGRVPSGRTVNGKALTADI
                     VLNAGDVGALTDTQAAQKYALRSIKINGKPLSADVNLLASDIDTWNKTESDGRYLMKTA
                     TAAAATKLATPRKINGVPFDGSNDITLTPANLGFGEVWFSERQRMILNEPIIIEHHISE
                     LNVDSCITDVMIVCIASIGAYSVGDVLMCPAALVSIAGASRYLPLTAGVSKTHIQFNVP
                     NRGFFGGDKLSGGGIIIGTQNELDNWAAVLKIINF"
     CDS             41232..42401
                     /codon_start=1
                     /product="Phage major tail sheath protein"
                     /label=Phage major tail sheath protein
                     /db_xref="SEED:fig|6666666.356863.peg.66"
                     /translation="MSDFHHGVQVVEINDGTRVISTVSTAIIGMVCTAPDADAATFPLN
                     TPVLITNVLSAAGKAGKKGTLAAALLAIADQSKPVTVVVRVAEGKDEAETISNVIGGSD
                     ENGKYTGMKALLDAMSVTGVKPRILGVPGLDSLPVATALASICQSLRAFGYVSAWGCKT
                     LSDAINYRENFSQRELMVIWPDFIAWDTTANASATAYATARALGLRAKIDQETGWHKTL
                     SNVGVNGVTGISASVYWDLQAPGTDADLLNQAGVTTLVRKDGFRFWGNRTCSDDPLFLF
                     ENYTRTAQVLADTMAEAHLWAVDKPVTAKLIDDIIEGIKAKFRELKSGGYIIDADCWLD
                     ETANDKDTLKAGKLYIDYDYTPVPPLENLTLRQRITDKYLVNLVASVNS"
     CDS             42414..42935
                     /codon_start=1
                     /product="Phage major tail tube protein"
                     /label=Phage major tail tube protein
                     /db_xref="SEED:fig|6666666.356863.peg.67"
                     /translation="MALPRNLKFMNLFNDGMSYMGVATAVTLPKLTRKLENYRGGGMPG
                     SAPIDFGLDDDALSMEFTLGGFADETLWSQYAAPGADKVLLRFTGSYQRDDTGEISAVE
                     VVMRGRHKEIDGGESKQGEATETKVSTKCTYYKLTIDGKEMIEIDTINMIERVMGVDRL
                     EQHRRAIGLV"
     CDS             42996..43292
                     /codon_start=1
                     /product="GpE+E'"
                     /label=GpE+E'
                     /db_xref="SEED:fig|6666666.356863.peg.68"
                     /translation="MNEHDNIVTLDTPIKRGDTLIETVTLIKPTAGTLRGVSLAAVAGS
                     DVDAMIKVLPRMTLPALTEAEITRMELPDMIAIAGKVIGFLTPKSQQGTSPEA"
     CDS             43307..43426
                     /codon_start=1
                     /product="GpE+E'"
                     /label=GpE+E'
                     /db_xref="SEED:fig|6666666.356863.peg.69"
                     /translation="MADIAVIFHWPPSELYPMSLTELILWRDKALKRSGHANE"
     CDS             43419..46166
                     /codon_start=1
                     /product="Phage protein"
                     /label=Phage protein
                     /db_xref="SEED:fig|6666666.356863.peg.70"
                     /translation="MSNSLQLSVLLRAVDQATRPFRAVQNAARTLSGEIQGSQEQLKTL
                     EAQAKRIEGFRKTSAQLAITGQALEKAKADAAALAMAFRNTTNPTRAQTKALEEARQKA
                     AELQTQHNRLRLSVQNQRSALRAAGIDTRNLSAAERQLRTNIAGATDTLNRQRAALARV
                     SQQQEKLNAVSKRYEQGKAITAGVRNTGAAAFGLGSAALYAESRLIAPSVEADGHGARI
                     AAQTGGNAADGKQYTRIIKEVNASGVSNDLTQIADAVAAVRSTLGTLGDVGETELARIS
                     RKALDMQAALGGEATESIQIAAIMMKNGLAKNSDEAFDLMVSGMQRVSAQMRGELPEIL
                     HEYSTHFRNMGFSGSEAMTLLVEMAQQGKFALDKTGDAVKEFSIRGSDMSKASIEAYDA
                     AGLNAAKMSTAIASGGNKARAAMQKTAQGLLKIKDPAERANAAIALFGTPIEDLSIDQI
                     PKFLTALAGAENKLGDVSGAADRMGDTLRDNLEGDIGRLRGAMASLRFNLFNDDDGILR
                     KLTQSATAWLNRVNEWVKANPELARQIVIVAGAATALITVLGGIGLVAWPIMSGINALV
                     AGAGLLSAGFGALSSPLTVIRGAMSGFGRVLMWLFTSPLALLRTGIMFIGSALGVLLSP
                     VGLVVAAIVGGALLIWKYWEPIKAFIGGVVAGFVAASAPIIAAFEPLQPVFTWIGDKIK
                     ALFGWFGDLLTPVKSTAAELDGAANMGKRFGEMLAKGLDIATIPMRSLISGVSWLLEKL
                     GLVDEKSKKLPTAENIMPPKEAAALQAGVSNAPTPQGNDAKAIAARYSGVRDNGGGIRL
                     GEFAVVGEHGPEIVEGPVNVTSRKKTAAMASAAMSMSAYRPIAPTVQASPASSPVSIHA
                     PISIVAQPGQSAQDIAQEVTRQLEQRERMARSRAFSQYSYQGGE"
     CDS             46168..46653
                     /codon_start=1
                     /product="Phage tail protein"
                     /label=Phage tail protein
                     /db_xref="SEED:fig|6666666.356863.peg.71"
                     /translation="MMLTLGLFVFQLQTLPYQNMQRNVDYRWPSNSRVGQRPALQFLGI
                     EEEKITLSGELLPEITGGTLSLLMLETMADQGRAWPLIEGSGTIYGVFVVNSISLTKTE
                     FFPDGRARRIEFTVTLTRVDSSLSAVLGDLRQQADGLIGSAGEMANRAQSAIGGLFA"
     CDS             46650..47807
                     /codon_start=1
                     /product="Gene D protein"
                     /label=Gene D protein
                     /db_xref="SEED:fig|6666666.356863.peg.72"
                     /translation="MINPLNVRAGSKTAPAYLLRLNEQDITTVITPRLLSLSLTDNRGF
                     EADQLDIEMDDSDGKMQLPRRGAVLSVFLGWEGEALIGKGDFTVDEIEHRGTPDTLTIR
                     ARSADFRGSLNARRELSYHDTTLGAIVEQVAKRNNLAPMLADGFAGIKIPHIDQTQETD
                     AVFITRLAERNGAIVAIKAGRLLFIRPGTGKTASGKPIPPQIIERSDGDQHSFSLADRG
                     AYTGVTASWLHTKEPQPEKPKTVKVKRQKKVLLHQGAQPQKTHPKAKKAKKEPEAREGD
                     YLAGTDENVLALTTVFATKAQATRAAQAKWDKLQRGVAEFSITLAMGRADLFPETPVQV
                     SGFKQVIDEQEWTISKVTHSLSNSGYVTALELEVLLSDVEYEGSE"
     tRNA            complement(48326..48409)
                     /product="tRNA-Leu-TAA"
                     /note="/transl_table=11"
                     /db_xref="SEED:fig|6666666.356863.rna.3"
     tRNA            complement(48421..48491)
                     /product="tRNA-Cys-GCA"
                     /note="/transl_table=11"
                     /db_xref="SEED:fig|6666666.356863.rna.4"
     tRNA            complement(48545..48617)
                     /product="tRNA-Gly-GCC"
                     /note="/transl_table=11"
                     /db_xref="SEED:fig|6666666.356863.rna.5"
     CDS             complement(48757..49305)
                     /codon_start=1
                     /product="CDP-diacylglycerol--glycerol-3-phosphate 
                     3-phosphatidyltransferase (EC 2.7.8.5)"
                     /EC_number="2.7.8.5"
                     /label=CDP-diacylglycerol--glycerol-3-phosphate 3-phos
                     /db_xref="SEED:fig|6666666.356863.peg.73"
                     /db_xref="GO:0008444"
                     /translation="MQFNIPTLLTLFRVALIPFFVLAFYLPFVWAPLLCALIFVFAAVT
                     DWFDGFLARRWKQTTRFGAFLDPVADKVMVAVALVLVAEYYHSWWITLPAATMIAREII
                     ISALREWMAEIGKRSSVAVSWIGKVKTTAQMMALFALLWRPERIVEGIGVVALYIAAVL
                     TFWSMFQYLNAARHDLLEP"
     CDS             complement(49364..51196)
                     /codon_start=1
                     /product="Excinuclease ABC subunit C"
                     /label=Excinuclease ABC subunit C
                     /db_xref="SEED:fig|6666666.356863.peg.74"
                     /db_xref="GO:0003677"
                     /db_xref="GO:0004518"
                     /db_xref="GO:0005622"
                     /db_xref="GO:0006281"
                     /db_xref="GO:0006289"
                     /translation="MSESFDASAFLKTVTSQPGVYRMYDVGNTVIYVGKAKDLKKRLAS
                     YFRSHVASRKTEALVKSIKHIDVTITHTETEALLLEHNYIKLYQPRYNVLLRDDKSYPM
                     VFLSGDAHPRLTIHRGAKHAKGEYFGPFPNGNAVRETLILLQKLFPVRQCENSVYRNRS
                     RPCLQYQIGRCLGPCVSGLVSEEDYQQQVEYVRLFLSGKDQQVLNKLIFRMEAASRELH
                     FEDAARIRDQIQAVRRVTEKQFVSGDGEDLDVISVAFDAGMACVYVLFIRQGKVLGSRS
                     YFPKVPGGTELGEVVQTFVGQFYLQGNLGRTLPTEILLDFTLPDKDLLTESLTAVAGRK
                     VQIQTKPRGDRARYLKLARTNAATALVTKLSQQSTIHQRLATLANVLQLPEIHRMECFD
                     ISHTMGEQTVASCVVFDANGPLRSEYRRYNISGITPGDDYAAMAQVLRRRYGKALDDSK
                     IPDVIVIDGGKGQLSQAQSVFDSLQVSWDKNKPLLLGVAKGSDRKAGLETLFFEATGEG
                     VALPADSPALHVIQHIRDDSHDHAIGGHRKKRAKVKNTSTLELIEGVGPKRRQTLLKYM
                     GGLQPLMNASIEEIANVPGISHALAEKIFHALKH"
     CDS             complement(51189..51809)
                     /codon_start=1
                     /product="BarA-associated response regulator UvrY (= GacA =
                     SirA)"
                     /label=BarA-associated response regulator UvrY
                     /db_xref="SEED:fig|6666666.356863.peg.75"
                     /translation="MRAGIRRILDDIKGLKVVGEACCGEDAVKWCRSNDVDVVLMDMSM
                     PGIGGLEATRKILRFMPDIKVIMLTIYTENPLPAKVMQAGAAGYVSKAAAPQEVICAIR
                     AVHAGKRYIASDIAQQMALSQLEPQTDAPLECLSERELQIMLMITKGQKVTEISDQLNL
                     SPKTVNSYRYRMFSKLNINGDVELTHLAIKHGLFTAETLLSSE"
     CDS             52127..52249
                     /codon_start=1
                     /product="hypothetical protein"
                     /label=hypothetical protein
                     /db_xref="SEED:fig|6666666.356863.peg.76"
                     /translation="MSTKNHYCNQDVITHSIIAYNDIIQIIYSEKSVHSEHHMY"
     CDS             52341..52481
                     /codon_start=1
                     /product="hypothetical protein"
                     /label=hypothetical protein
                     /db_xref="SEED:fig|6666666.356863.peg.77"
                     /translation="MALSTNNINPQYALCYTPRYLILPVVSAVTPQQAKENTFFLVEEK
                     T"
     CDS             52478..52702
                     /codon_start=1
                     /product="hypothetical protein"
                     /label=hypothetical protein
                     /db_xref="SEED:fig|6666666.356863.peg.78"
                     /translation="MSNVDFSTTASAETLAHEVTCLKAMVTLLLKAIGQADAGKVIINM
                     ERYIAQLEDVEQAAVFDNTIKQIKTSYRK"
     CDS             complement(52796..53083)
                     /codon_start=1
                     /product="hypothetical protein"
                     /label=hypothetical protein
                     /db_xref="SEED:fig|6666666.356863.peg.79"
                     /translation="MGFEKLLAVIEKSYQDPKSVISLSELSQAIHEIICTESSKEYKIN
                     ECFTELRELVDERKALSRKQLLGKALVMELTQYKKKEEALLLKLISIGNR"
     CDS             complement(53480..53605)
                     /codon_start=1
                     /product="hypothetical protein"
                     /label=hypothetical protein
                     /db_xref="SEED:fig|6666666.356863.peg.80"
                     /translation="MCVGFLTQLDLLTRASPVEAAAAGRFSLTRITYLSKLIGMK"
     tRNA            complement(53844..53916)
                     /product="tRNA-Lys-CTT"
                     /note="/transl_table=11"
                     /db_xref="SEED:fig|6666666.356863.rna.6"
     CDS             54253..55665
                     /codon_start=1
                     /product="D-serine/D-alanine/glycine transporter"
                     /label=D-serine/D-alanine/glycine transporter
                     /db_xref="SEED:fig|6666666.356863.peg.81"
                     /db_xref="GO:0006810"
                     /db_xref="GO:0016020"
                     /translation="MVEQSKESADLTSEQGEGLQRNLTNRHIQLIAIGGAIGTGLFMGS
                     GKTISMAGPSIIFVYMIIGFMLFFVMRAMGELLLSNLNYKSFSDFAADLLGPWAGFFTG
                     WTYWFCWVVTGIADVVAISAYSQFWFPDLSQWVSSLLCVLLLLTLNLATVKLFGEMEFW
                     FAMIKIVAIVALIVVGVALVMMQFSSPSGNVASFTNLWNDGGMFPKGISGFFAGFQIAV
                     FAFVGIELVGTTAAETKNPKIVLPRAINAIPIRIIMFYVFALIMIMSVTPWSAITADRS
                     PFVEMFVLVGLPAAASMINFVVLTSAASSANSGVFSTSRMLFGLAKQGDAPKSFGMLSK
                     RSVPSTGLMFSCICLLSGVVLIYLIPNVMTVFTLVTTVSAILFMFIWSIILCSYLTYRK
                     KRPQLHAESSYKMPLGIFMCWVCLAFFAFVIVLLTLQPDTRQALIVTPLWFIILAIAYQ
                     FIRRKKQAVDVK"
     CDS             complement(55694..55879)
                     /codon_start=1
                     /product="hypothetical protein"
                     /label=hypothetical protein
                     /db_xref="SEED:fig|6666666.356863.peg.82"
                     /translation="MLCAIFLKKIEGADIVCAFLALIPAMLQVTCALVAFKYSACRGPQ
                     PKGPTRCVVQNANFLS"
     CDS             complement(55976..56242)
                     /codon_start=1
                     /product="hypothetical protein"
                     /label=hypothetical protein
                     /db_xref="SEED:fig|6666666.356863.peg.83"
                     /translation="MNNILSHLLIKLAEKEVGEKALNAKIESLEMLISAIVSTLDDNKI
                     NELNKRIEGVVADASQRKDECNCLAFELLAKNINRITTVSLRE"
     CDS             complement(56630..57070)
                     /codon_start=1
                     /product="Nitrogen assimilation regulatory protein Nac"
                     /label=Nitrogen assimilation regulatory protein Nac
                     /db_xref="SEED:fig|6666666.356863.peg.84"
                     /translation="MMGSPYKIKEVGWQNHFFSLFYLFLIKAISLFLRHRNIIWRAFCY
                     LFRVITQEAGMNLRRLKYFVKIVDIGSLTQAAELLHIAQPALSQQVATLESELEKQLLV
                     RSRRGVTPTEAGKILYSHAQTILSQCEQAKDAVSGARQSMSA"
     CDS             complement(57153..57275)
                     /codon_start=1
                     /product="hypothetical protein"
                     /label=hypothetical protein
                     /db_xref="SEED:fig|6666666.356863.peg.85"
                     /translation="MRWIIAVAFQVVKGCYRWMRLIAELITNILKLLLKLNTKK"
     tRNA            57285..57357
                     /product="tRNA-Asn-GTT"
                     /note="/transl_table=11"
                     /db_xref="SEED:fig|6666666.356863.rna.7"
     CDS             57540..58817
                     /codon_start=1
                     /product="Integrase"
                     /label=Integrase
                     /db_xref="SEED:fig|6666666.356863.peg.86"
                     /translation="MSLTDTKVKKAKPLEKEYKLTDGFGMHLLVHPNGSKYWRLSYRFA
                     QKQKLLALGVYPTISLTDARERRDEARKLIAYGIDPGARKKSGRERQGTHDESRSFAIM
                     ARAWAETKTKWSEDYKVKVWRRIENYLLPDLGNRDVSELDTSDLLIPLRKVEKLGYLDI
                     AMRLKQYTTSIMRYVVQQKIISYNPAYDLQGTIEKGETAHRPSIEIYEIPDLLQKLDNY
                     RGRGLLTELAIKLTLLVFVRSSELRFARWSEIDFKKSLWVIPEQRKEVKGVKHSGRGAK
                     MKRKHFVPLCRQAVEILKEVKQITYGEKAGDGFIFTGFYDSDSAMSSGTINKALQRMGY
                     DTKTDLCGHGFRTLACSALTESGLWSEDTVELQMSHKEKNTVRSAYTHKVSHLDQRKLM
                     LQWWADFLDANRNGVVSPFEFANRKQ"
     CDS             59098..59760
                     /codon_start=1
                     /product="hypothetical protein"
                     /label=hypothetical protein
                     /db_xref="SEED:fig|6666666.356863.peg.87"
                     /translation="MSPVDIIKSATYPLIPAALGVFFWVLMDSYNSKGTRKPEDDDPKI
                     IKILFWLILSLGIMLTLMNIFSLSIYLYNLFITEPEKKISYALPIASMVSIFYFLHNPP
                     FLIDKEKLIRNFVIIFTCTLPTISYFQGSKNITNLLEGSSDFYYLKTSSKNCLVDKKSK
                     IIYLGYFSGNYFFVNSINKDICIEKDGGVLLSFNKNKEGDHDENIKEAEASSNKEIH"
     CDS             59911..61053
                     /codon_start=1
                     /product="hypothetical protein"
                     /label=hypothetical protein
                     /db_xref="SEED:fig|6666666.356863.peg.88"
                     /translation="MMNIYNFDSDLHTFGKDFDTVYEDKALISRGQFLHAYPLNRLKDI
                     TLDEYVIGKGTASFCACVEAKTKAWANMQGATAYKFGVYFGKTKDDLKTQYRFTKKFGK
                     TTNEAFHRVKEALLNLIQAGQSKNFREIDENPLSQMFKAKILSLYFPDIYLNICSSEHL
                     TEIALKMGIQEQKFVSRYQNLLVENKLANKITKDWSNPKFMSFLYAKFIREDLKKNISI
                     TIKKTRKKARRKVNFEDISASRDAIGKMSEEFAIEWERNRLIGLGYQNLVEKIEDRRDT
                     PSYGYDYLSFNTPGHERYIEVKSVGRNRKEECFQFYLSENERSVSISDESSKDYYFYLV
                     FYSKDGNPYDVLAKRAKDFYSNSEMFPCSYVVRFDLEEND"
     CDS             complement(61148..61978)
                     /codon_start=1
                     /product="hypothetical protein"
                     /label=hypothetical protein
                     /db_xref="SEED:fig|6666666.356863.peg.89"
                     /translation="MEKTMQEDIITSKNGKGIFNRKDWLDESKKLYLSAKLLRECGEDN
                     KELLRDKGGNIPYNKACDYIDMVSSTAKTSRLLLGYSFEMLLKSAILLMNYGARKETLD
                     KIFREYGHNLEKMAADLGLMLNKDEMILLKLSAHDIVLQARYPIKVEDDDKYIDELNER
                     NSQLASNKTFYDMVFLYDKIKSIVAKFDRDVNNCADFNKFRCNDFILFMRSGGGLKSRA
                     IVSFSSSFIASNKNKLFLKSFIQEHSGKIALLYIWQWDSFEFFEDTGKKLLSLG"
     CDS             complement(62048..62242)
                     /codon_start=1
                     /product="hypothetical protein"
                     /label=hypothetical protein
                     /db_xref="SEED:fig|6666666.356863.peg.90"
                     /translation="MSTIKRDTKKSSSTGKSPTFQIRISPELREQLDEVAAKEGVSLGN
                     WFKELARQELRKQGIEPKG"
     CDS             complement(62341..62481)
                     /codon_start=1
                     /product="hypothetical protein"
                     /label=hypothetical protein
                     /db_xref="SEED:fig|6666666.356863.peg.91"
                     /translation="MTHLRSLPEQIKTTLNLFKVLINKGIARLADSHIVNSITVWLAPA
                     W"
     CDS             62480..62659
                     /codon_start=1
                     /product="unknown"
                     /label=unknown
                     /db_xref="SEED:fig|6666666.356863.peg.92"
                     /translation="MFDNTPLEPEEIIDQCRALIYAVIETKQPQVKEILTFILWERLDW
                     LYQDFHAEEVVQNQ"
     CDS             complement(62862..62984)
                     /codon_start=1
                     /product="hypothetical protein"
                     /label=hypothetical protein
                     /db_xref="SEED:fig|6666666.356863.peg.93"
                     /translation="MLRTDNNSGSVLVWQSVLVAPSHRSRTDYGIQIDIDFIMM"
     CDS             63142..63255
                     /codon_start=1
                     /product="hypothetical protein"
                     /label=hypothetical protein
                     /db_xref="SEED:fig|6666666.356863.peg.94"
                     /translation="MAYLPYIKLYYEKTIWVKHIYVCYKIGILNSLKNNTL"
     CDS             63360..63518
                     /codon_start=1
                     /product="hypothetical protein"
                     /label=hypothetical protein
                     /db_xref="SEED:fig|6666666.356863.peg.95"
                     /translation="MKSENTAKKPIENKAVTIKNNAVLARLMEEVRHEKDIMANSRYDR
                     VHNRHNR"
     CDS             63487..64650
                     /codon_start=1
                     /product="Transcriptional regulator"
                     /label=Transcriptional regulator
                     /db_xref="SEED:fig|6666666.356863.peg.96"
                     /translation="MIVFTTATTVSQMLDTVLLKTASRCNLDCTYCYVYRGADTSWKEQ
                     PYHMSDTTIKKIIERLSEYSTYQSAGFAIVLHGGEPLLLGYKRLVSLLTGLRNYLIPEK
                     YPISIQTNGALISDKILELCEKNQVSISVSIDGSRKANDIARFTRSGKSSFNEVVAGIK
                     KLSSHPNSKFLFAGTLSVVHPNIHPQDTYNYLKKLNTPSMDFLFQDGNHDKLPVGKRGF
                     VSTEYGNWLHSIFLLYINDPSPVPIKILDDIIKILLGGTPSKEGKGENDFGILVIESDG
                     EIRKNDTLRASFEGVDYFINRPNIYSSSISDVINTDEFKKYTKTSMPISETCKSCEHIH
                     VCGGGMPLYRWSKENGFNNPSVYCEDHKVVINEIKKYLIDNSLISEQ"
     CDS             64640..65239
                     /codon_start=1
                     /product="hypothetical protein"
                     /label=hypothetical protein
                     /db_xref="SEED:fig|6666666.356863.peg.97"
                     /translation="MSNEMITTAWEKEINTSPYKYFSCSSGLPSEISDDILGWLETNAP
                     WKRVNQSFYDQYEFSFYDAELPEKISFIKSDIFINELKSFLEKNFTVCLSNKVDIVAHK
                     LISGDKIKIHNDYIEGQESHRILFHFNKEWNENNGGYFMVFSKDNPESLHAIIPPLHGN
                     VQGFEISINSHHAVSKVYDMERYSILYSFYRKKHGH"
     CDS             65229..66026
                     /codon_start=1
                     /product="hypothetical protein"
                     /label=hypothetical protein
                     /db_xref="SEED:fig|6666666.356863.peg.98"
                     /translation="MDINKFICKPLSWGYNDPIFLSLCEDHAGYTIKNTTQPQNNSDKE
                     FFLKKPGIDYIHPKFLSESEKIAWESMGISFVEEENFQYSSFNDLALQMYESLACVRNL
                     QSSISSFALVFHPILSAPNNDVSFSDPDIPFDIFCSIPSIQEANRLERFTESVIHETLH
                     LQLTCIEKHIPLFHEEYLSNHFYSPWKGEGRNERGLLHAIYVFSNIRKYWITMNNSSVK
                     NSNFIERRIISITNELEKSEHIFTSKALTKEGSRLATLCFSDL"
     CDS             complement(66208..66489)
                     /codon_start=1
                     /product="putative; ORF located using Glimmer/Genemark"
                     /label=putative
                     /db_xref="SEED:fig|6666666.356863.peg.99"
                     /translation="MALLSQSDLKHTYSWTALGNDDPKKTGKPDSTLLNRHEGYEVLPF
                     INRFAEKHSLKNKAIGLKVEKMIRENLPGDVRSHKNVIAWLENNWNNY"
     CDS             complement(66537..67193)
                     /codon_start=1
                     /product="hypothetical protein"
                     /label=hypothetical protein
                     /db_xref="SEED:fig|6666666.356863.peg.100"
                     /translation="MKRLKLASLLPGFLALNNSVWASDAAMNIEEFGYSPLNDHDLVLA
                     PLNTEVPFYIAGHRSHSSHRSHSSHSSHRSSSGGGYYGGSATPYYPRSSDSSSGSSGSG
                     VTSSPSSPAASSPSTRALRPETGNSVSSSRSGTSQNTNTSMNGVSSDQEKRRRLIMRVQ
                     FALFDKGYYEGIIDGVMGPGTRSAIKTYRINKGLPLPATETLDTQLLNSLGVLAR"
     CDS             complement(67190..68302)
                     /codon_start=1
                     /product="hypothetical protein"
                     /label=hypothetical protein
                     /db_xref="SEED:fig|6666666.356863.peg.101"
                     /translation="MSEVLRNDIFRFTAKNTVEMGFYRLCKKKPVDPQFFLPNLLIQPS
                     FDDGAVAPYYAGSIVSNQLYESVEDGDIGVVNNGNMLRVILSRRANHNTVLVTERCNNR
                     CLFCSQPPKTPNDDWLLTQSALAIAAFNFNGLVGVSGGEPLLYGEEFLSFLDFVIDNAP
                     DTSLHVLTNGRQFADARFAAKVRERSKRMNITFGIPLYSSRQHIHDHLVGSDGAFRDTV
                     KGLINAGNSGINIELRVIPTKANYHDLADVVEYIGRVFSNISQISIMGLESIGWARKNW
                     DEIFVSHDSYATSLSLATDTANRAGVPLVIFNYPLCHLPESLWDYSTQSISDWKNYYPE
                     ACEPCSKKSSCAGYFSSSKGRFHQMPRPIL"
     CDS             complement(68295..69689)
                     /codon_start=1
                     /product="Arylsulfatase regulator (Fe-S oxidoreductase)"
                     /label=Arylsulfatase regulator
                     /db_xref="SEED:fig|6666666.356863.peg.102"
                     /translation="MKPMPFNFDRLNDGRVFISNLAGFHHFISNDELESLSCNKWSPEF
                     RSSDILESKLFIADDASEDLASASLSSGFAKRLMSDLAVRPIFMIVPTLRCDHTCKYCQ
                     VSRAAIGAEGYDLDPHLIPDIVQTIKKLSSPPYKIEVQGGEPLLRFDLIQEIYAECERT
                     LGQQCFEMVIATTLSLLESSMMDWVKDRNITFSVSLDGGEDIHNKNRLLAEGKSYSKAV
                     AGMLAVREQLGAGRVATVTTVTKALIQHPGSIIDAHLGLGLTDIFVRPVSPYGFAHKES
                     FTFSMQEYFDFYAALIDEILWHNQKGTAVVEHSAAIHLKRIFNPGFSGYADLKSPSGVV
                     LNCILFNYDGRVYGSDESRMLQKVNADADFSAGAVSGLSFSQSPYYQSVLSSSFNFALP
                     GCDTCAYQPFCGADPCQNISVQGEPVGDRSRSIFCQYHKGMFRFLMNAIAQDGPTATML
                     KRWAYV"
     CDS             complement(69686..69961)
                     /codon_start=1
                     /product="hypothetical protein"
                     /label=hypothetical protein
                     /db_xref="SEED:fig|6666666.356863.peg.103"
                     /translation="MFIKTIEKTNHSEWVVRNSLYWMSAYTRWQLGADDNDWIVSFESF
                     DGTIKFEFERLLNDYKLREAHQSHTGHIRASIISTVLRSIDVRLSE"
     CDS             complement(70346..70459)
                     /codon_start=1
                     /product="hypothetical protein"
                     /label=hypothetical protein
                     /db_xref="SEED:fig|6666666.356863.peg.104"
                     /translation="MVFGKITRFNLPPKKRNLNFKFYTGVIFFSVDSDCIA"
     CDS             70583..71494
                     /codon_start=1
                     /product="hypothetical protein"
                     /label=hypothetical protein
                     /db_xref="SEED:fig|6666666.356863.peg.105"
                     /translation="MILPGYEPRSATIPAKIDYELSLEYQLEKVIWCAEKFSTRLREDR
                     HSNDLENESYFLFDTLINNIATLTEYYFSNVIYSLIGTILDKPQKIEFRGFDNSNYIHK
                     KNDIFKRFKIGELTKGSDVEKKTYLNRCSEHFDKYLEFIISGRYDILYEINNYIKHNAR
                     LRGFWLKSGSSKDEFIKYHFLRFTADNEFLFKDKIIKGLLSIDYDEAIQDNFELVLKNR
                     KYNPVKKYGSFVFFANDDVVYVRGPKGAGLTSNSIVKKSYQLCLEIINTLIASKTGQIT
                     VLEKLNSFKEVIERENNKLPLI"
     CDS             71789..72331
                     /codon_start=1
                     /product="hypothetical protein"
                     /label=hypothetical protein
                     /db_xref="SEED:fig|6666666.356863.peg.106"
                     /translation="MSRKPNLKKALVSDILLLIFTVIVCVLIFGFILKLLIQSDLSNGT
                     RECNIKNNWVSMSCIILASLAMSYWYYLKGKSIKALNDLLLFFSAAVASYFYIMDHETY
                     LEYHDNSMLCKNMTYMGWQIFILTCSFSKAFIASIEFIQERSFLINTSVIKCNHSDKEL
                     FFYKLASSLIEILRKKG"
ORIGIN
        1 tattaaaata atctgacaga aaccagtaaa atattagata gctgccagat tattaatata
       61 tcaaatcata taaccaaatt acgcttgatt tttaaggctc tattttttca atagaagtaa
      121 tatgggcctc accacttaac ggtttataaa tacgtaccag cgtcatattt agttgtgcgt
      181 tgggaaatgc accaatagcc ttggataaaa aagaataatt tgtcccggat actatttggg
      241 tcgccacaaa tataggcgtg tatttcatgc caaccaaccc attcaatact gattcaaaga
      301 acgacttatc tgcattgtca acatcacgaa aagcactcca accaccaaca gtattatttg
      361 acataaatca cctcatataa ttagctggat aatagtttct tatgggatgt atcatattcc
      421 actgcaaata gcggttatga gtataagaag tgtactggtt ttttacaaga ggattctagt
      481 gaaaaaatag tagtgatgta tcttatatta ttatgtatac gatatgctag ccaacatgaa
      541 taacacttat attataaagc gacataatac cccttgcttt actcaaaaca aagtcactta
      601 tttattaccc gattaatttg acactttctc tatatacctt aacatataaa tataacaaaa
      661 attattaacg aggtatttat gagaaatgta aaattagata acagcgattt attagcatat
      721 tttgatactg ttcaaaagct taaaaaacaa ccatcaatgg acgagtatag aaaagaatat
      781 ttcagactgc gtgaagatga ctctgtgcca caatataaac taagagaata ttactcagcc
      841 catacggaac tacgcaggtt ggatagaaag agaaaatctc ttatggattt ttttattgaa
      901 gaacttaatc ctatcagttt ttcaacagct aacacatctg caaaatcatc aggggatctt
      961 gataaatttt atgagagtag gctttatggg aaagcaattg tagaaaaaag tgatgaagaa
     1021 attgtatccc taattataaa acagcgcaca gaggcagcac ttgagtttca acgttctgtt
     1081 gagcagagcc ttgaacagct ttccagtatc tcatcagatc ttgggacatt gaatacaaaa
     1141 cgcaggaaaa tggctattta aattgtatta tgtattcagc ccgaataatt ttttaaatgc
     1201 cattttccca ctggcagtaa tagttacttc tctgaacccc ggtattctgg ttagccaccc
     1261 tttttgctca caatgcgtaa aaaaagcagc gccggcctcg ccaccaagat gaaatcgccg
     1321 ttcactccag tcaaggcagc cacagcacgt tttacgtcgt gtctttggct tggacataat
     1381 acctaactct cggaactgtt cttgtcctga tggcgtcatt gacgcgccat ctgacgtaac
     1441 ccaaccttca gcaatcataa aatcatagat atgaaccgag atctcaccgg ctaaatggtc
     1501 ataacacgtc cgggcaaccc gtaatgatga aggtgtgttt attttagctg atgatgttga
     1561 gcgccatgac acgcccatca tgttttcaat cagtccggca atgtctgttc ctgccagacg
     1621 gtaataacga tgacgtccct gagaaagaca ggtaatcaat ccctcactga ccaaccgtga
     1681 cagatgtgca ctggcagttg atgccgcgat atcagcgacc acacttaact ctgttgccgt
     1741 ccacgcacgt ccatccatca acgcgcaaag catttttaca cgggaaggat cggatatggc
     1801 agccgccaga gctgccattg aatgttccag agcatcaccc ctatctgtta acttagcgta
     1861 ttttaacata ttactcaggc acgacagccc atttctccgt tgttttactg gcaactctat
     1921 cattatcagt cacaaggatc agctggtttg catggtcgct atattggcac aggatattaa
     1981 tccccttctc agccagtgtt gccgcaattt ctcctaactc accggggcgc tcttgcttaa
     2041 gttttcggat cagtggcctg catacacttt caacctgaaa tcctgcgttt tccagcacgg
     2101 ctttggcagc atcccccttc tcaacaagaa aatgcgcatg tgctttgtct ccaatggtaa
     2161 atacgccacc accctcaagg ccaataccat tttgacctaa taccgccccc agtgcagcca
     2221 gttcgcccgg cgtattcttt aaaacaacat ggatgtcata catcggtctg acctctggtt
     2281 tctgatgaat agtctctgag tgcatgggca atacggattc gataaaaaga gaagatagat
     2341 ttttgtcctt ccgcctgagc cgccttatgc aaaacgtttt gtttccatag caatatggcc
     2401 tcttcatccc tccaccaaga caatgacaat atcttttccg atgttgtcag actctggaaa
     2461 cgctcgatag aaataaaacc atcaatatcg gctaatagcg gtttcaattc agcagcaagc
     2521 tggagataac gcacttgttg tgtgggaaca acatctgctt caaaaagcac tgcgatcaca
     2581 ttcctaccct ctatgtatta gacacgggta tgactgtacc gtgttcagtg ctgaacactt
     2641 cgatggaggg cgaaatatgg atgtcatcag caatagcacc tgtggcaatg actggtatca
     2701 gtgataaagg tcttcaggtg atacacgatc acaccccatt ttctcaagca acagttgtaa
     2761 tctcttggcc ctcaatttct gggccttttt ctcaccaatc tcctgatagt attcttcccg
     2821 tcgctccgct accactttac ggaacttctt caaaagctgg ttcagtgttt tgatgtcagt
     2881 agtagcggct tcagcttgga tgtttctata cataaacata acgtggaatt catcaatcat
     2941 attaaacctc atagtgttat cattgatttt atttccctct tacgagggaa tactcattac
     3001 atctgaataa tcaaacaact gtcactttca gcttccaata aacagggtct tgattttcat
     3061 cctgattaat atttttaaac acgagttcaa tgatatgctc aagatgccaa tgtaagattt
     3121 catcctttaa atcattttta ttgataccag acgcatcatt tttaatagag tatttcatta
     3181 tctcacgagt tataatcaca tcataaataa cttctgaaag ttcaccccaa ctcataatat
     3241 ggattgctgt ttcaggatca ctttcatgaa tattatatat ctcatcacag aatccttgta
     3301 agatgttagc aacaagaaca ttttttgttt tatcatagct attcaataca atctctttca
     3361 ttttctcacc cttacttttc agttaatagt cagtaaaaca ttagttgtta tagccgatat
     3421 ttgtgatgac acagctatac tctagccata aatcatctac tagctcgtta ttaataaatc
     3481 gatttaactc ctcaagtata ttcttatcat caatgatttc ttctactgaa tatccagtaa
     3541 tagcaacaaa tatttcaaaa cgctcttgaa tagtattcat tacttctgga ggtccatcac
     3601 acaacacgct tacaactaca gacattttat ttgtcataga actttgttcg ttgttgttta
     3661 ccatttttac tttcctttta tatattttgt tagcccctta cggggcagga ttatttttac
     3721 tttctaaagt tttctgaata ttcgactaac atggcagcga ccagttcaaa gttaacttga
     3781 ttaatgtcac cactattacc ttcttgggca gtgaatcttt caaagttgtt ctggatatgg
     3841 tctatcacat ggataataaa tggactcata aaatccgggg catccaaata atcattggcg
     3901 tcaccatcac cattaacttc cataaacata ttccagcttg cggcaaacga tctacaagca
     3961 agctcataga acagttcggt tgatttatta atgcttattt tttctttaga catatttata
     4021 tcctcatagt taaatgctta tttaaattca ttgtgttttt tattagcccc tttcggggcc
     4081 gaatacgctg ttgttagctc ataccaaaaa gcaatgcctt tatatggaca cttttcattt
     4141 ccaatataac tttatccata tcaacataaa tcagtctctc tctcttaccc gcttcttcca
     4201 tatgtccatc aaaacgctta gccagataat ctttaacatg tgaaagatac gattccgttc
     4261 tattattatc taacataata gatgcgacta actcatgatc tccttgatct ttatatatca
     4321 gcattccagc cacataaaga tactttgtca tagcataaaa tgtttttgtg gataactctt
     4381 tgatactttc catttcttga ttattcattt tatttcctct tgttgttatt aaactatttg
     4441 ttattcagat acaggacgtg aatcagaaat tattttctca atccatgtat caatctcact
     4501 ttctataaag gcaatagacc ttaaacccgt tttaacctgc gatggaaagc gtccggcttt
     4561 aataagcgta taaatccatg tctttccaaa tccggttctt ctaatcactt ctggtaaacg
     4621 gataaggcgt tgttttttgt ttactacgat ttgaaccata tttatctcct attttttacg
     4681 taatatttca atatttcgtt tttcagtatg tgatttgatg gaaataattg tatggatatc
     4741 gcttgtaaaa aacgaggttg gttcaccagc cccgaacaga ggggaagttc aggaccagtg
     4801 aatttcgggg atttttatga ggggtgaatg ccggggacgt tcaggcttag cgactgtccc
     4861 ttgttttctt cttgtcttca ggtttgtcat tcatgccgat gacagcaagg atatctgaac
     4921 tcttcacatg catgtttttt atgaaaaagt catttaacga cttgaaataa ttatcattgt
     4981 tcaaaaaatc ataggctaga gggtaatccg tatctttgat ttgctcacta cctctggcat
     5041 aacgcatatc ggtatgcagg ataccagcca gcacaggata agggattttc tgattgttga
     5101 gctgttccca accaatgaga tccatcaaag ggatgatctt gtaatcgagt atcttttgga
     5161 atgttttatg accaaaacgg aagtcttttt ccggtggctt gggcgctttg aggtgcttct
     5221 gccactgagt gataagcact tttaggtgtt ctgccagatc gtcactgctg gcttcatcca
     5281 gatcaatttc aatcagcatc ttattggtag ggttcagccc tccctgtttc aggtattcag
     5341 atatgtattc tgaactcact gaaacatcat ctttctgatc agagttttcc agccgataca
     5401 tagctcgccc atagttgaac aacgaattcc ttgtcattgg cctgactgca tagctatggg
     5461 ccagcatatg actgtcagag acccatttag tctcatgtat gaccttacca gaacggattt
     5521 gtgcatcatg gtagatcgcc agcatttggt tctcttcgcc tgcagtttcc cactgctgcc
     5581 ttgctttata ggcaaatatc cgtctttcaa gctcagcata aatctgttct agcgttaaat
     5641 ctttcagcac atcgtaacgg cttacatcaa accactcact tagagcttct acgatctccg
     5701 ctttaggcat cttttttgtc attgttttct ctataaatgt tgattttgag ttttgataaa
     5761 gctatctcat tcaacagcat agagaaagtg aaaaaagatg tcaggcttcc caagatgggg
     5821 gcattgaaga attgaatgta acttggtatc ctccttggac attacttgac caatgctaaa
     5881 aaatcacttg ctcattcaga ccttcaagaa gtttgccatg acctaaacgg ttcttttgct
     5941 aagtgccaga gtgggcattg cttgcattgc aatgtgctgg taacgaggag tcgatcaact
     6001 cacttgttat gattcaattt gtattaggtt aataaggaac atattataac cataaatttg
     6061 attgagatca tgtttttaat tagaagttgg ctttttactc ttgataatgt ctcttatgga
     6121 agcatatgta attaatgacc tcaacaagga aattacatga gcacagcaac tgactttaag
     6181 acccttctcg ataatataaa aatagataat gcaggtcaga ttagtaaaag atatggtcgt
     6241 ataactaagg tcctgaacca atatttttat gacatagact ctaagacagc caattcacta
     6301 caggttggtt cctatggacg tttcacaggg attcggggga tctctgatct tgatatgctt
     6361 tactttcttc ctgcaactga atggccaaga ttccgagata agcaatcgta tttattacag
     6421 gttgtgaaaa cagaaattaa gaaagcttac aaaaacacag atattcgcgg cgatgggcaa
     6481 gttgttgttg ttaaatttaa aaatcaagag gttgagatag ttccagtatt ctgtaatgaa
     6541 gatggttctt ttaaataccc agatacacat gatggtggct cgtggaagat atgtaatcct
     6601 agggccgaaa tgtcatcctt taggatacta aatgatgata gaaaggggca tctgagacgt
     6661 ctatctaaaa tggttcgagc atggaagact cgtcatgaag ttgagataag tggattccta
     6721 attgatacac tgtgttataa atttttttct aatctatctg aatataacga caagagcttt
     6781 aaaagttatg atcaactctc gcttgatttt ttcactttct tagagaatga aggtgataga
     6841 gcattttatt atgctcccgg tagtcactca aaagtgatcg taaagaaatc gtttaataaa
     6901 gtggcaaaat taacaaggga atattgtgaa gaagctttat ctgctactag tgaaaactct
     6961 aggagagtag cttggaagaa aattttcggc agaccatttc ctaattctac gactaaatct
     7021 ctcagcgctg tcaatgtatc tgaacagtat attgaagatc aatatgagct gaatttatat
     7081 ggtcatgttt ctatcgaatg cgagattaga aagaataatt tattggaagc tcttctttca
     7141 aatcttcttg gtgaaggaca tgatattagt acaaatcgaa agttaagatt ctatgtggat
     7201 gagataaata atatacctca cccatataaa attaaatgga aaataaaaaa tataggtgat
     7261 gaagcagagc gccgtggaaa ttttagaggt gaaattttag atgatgaagg ctattctgaa
     7321 cgtttcgaga ccgcggactt ctctggacct cattttgttg agtgttatgt tattcacggc
     7381 aatcaagttg tagcaagaga taaaattgac gtacctatac ataattagtc ccactttatg
     7441 ttaggttagt gttaaactaa cattaaccta acatatcata atggtgaatc ggatggatag
     7501 aaatatatta gaaggacaac taagagaatg ctatggaagg gttgtttaca cacataaaac
     7561 tcacgaaaaa tgtgcagata ttcttcaaaa aaaactaagc tgtatgaaaa acctacagct
     7621 agttcttttg gcaataacta ctggtagttt tatcgctaca gtggtgggtg atgctaaaat
     7681 aggagctata attgggtcaa tactttccgc tatactcctc tttttaaact catatttgaa
     7741 ggattatgat ttaggcacta tagctcaaaa gcacagacaa gctgctgggg agatgtggtt
     7801 aatcagggaa agatatttat ctctactcat agacttgaaa atgcaaacta aaagtattga
     7861 ggaagttctg aaagaaagag atgccttgat gattgaacta tctgcaattt atgtcggagc
     7921 accatccacg aattataggg catatacaat ggctcaaaag gcgcttaagg aacttgaaga
     7981 tatgactttc gctgatgagg aaattgataa attcctccct acagaattga aacgaaaata
     8041 aacccatgga ttatagttgg ccaatccttt aacattatgg aattgatttt cctattttta
     8101 aaattttttc ctgagtaagt ttttagcatt cacttattac tcactgttta agcattctta
     8161 caaagaacgc ttttcataag ataataaatg tcagtttatc gttcaggctg tgtgaaaacg
     8221 ttttttttgg tcgctaatat caccaaaaac agagctgaaa accgcgctca tacgtaaaat
     8281 ccagctcaac taaccagccg atcaatttca gattttacat atctgcactt acttcagttt
     8341 ttggtcagcg tttccacaca gtctgctctc aaagcagcct gtcgcatggc atgtaggtat
     8401 ctcaggtttt gctggaggtg ttcaactggg tacagattct cacgcatggt gaattcagct
     8461 ttaacctgta tcagctccaa tcaatagaca atgttaaaaa ttgagttatc agtcaataat
     8521 cattttttca caaacataaa aatcatataa actctgacaa tatgatgttg aacatcaaac
     8581 cttgcacaaa cagcaataga caacacgtta tgacaacaac caattgtttt taattgacat
     8641 tttatgtgat tggattaaat aatgatggta aaaatgctgg taaaaaatca cactaccatt
     8701 tcaataccgc taataacagg agacacagat gaagttcgag tccagtcaga ggagccaatt
     8761 tagaaaaccc tgcttaagat aacttaagca gggtttttgc tatttagcat attattcaat
     8821 gagttagcgt aaaatatctt cccgatgcat tttcagtttt ccctctgtat cgggagaatt
     8881 tggtagtcag atttggggtc aagttggttc gatgacggag tgacccccaa atgtctctta
     8941 acgactcaaa aatccgcaaa ttaaaaccat cagcaaaatc cttcaaagtt tccgattctc
     9001 acggtctgta cctgctggtt aattcaagcg gttcacgtct ctggtatctc aaatatcgca
     9061 tcaatagaaa agaatcacgc ctcggcttag gtgcctaccc tgatgtatct ctggccgacg
     9121 ctcgtcagca gcgtgacggt atccgcaaat tgctagcgca gaatatcaac cccgcacagc
     9181 agcgctctgc tgaaagaacc acttcctcac cagagaaaac cttcaagcat gtggcattgg
     9241 agtggcataa aagcaaccgc tcatggtcag agaaccatgc cgcccgtctg ctcgccagca
     9301 tgaataacca tatcttcccg ataattggac atctgccggt cacagaactg aaaactcgcc
     9361 acttcatcga tctgctgaaa ggtattgaga aaaaaggtct gctggaagta acggcacgaa
     9421 cccgacagca tatgtgcaac atcatgcgtc atgccgtaca tcaggaatta atagagaaca
     9481 atccggcggc aaatctggat ggcattatcg cccctccagt taaacgtcac taccctgccc
     9541 ttccattgga gcgactgccg gcgctgttgg ctagtattga ggactacaag cagggacgtg
     9601 aattaacccg cttggccgtc tcactcaccc tgcacctgtt catccgttcc agcgaactac
     9661 gttttgcccg ttggtctgag atcgatttca gaaacaaaat ctggaccatt cctgccactc
     9721 gtgaagctat ccccggagtc cgctactcag ggcgtggggc aaaaatgcgc actccacata
     9781 tcgttccact ctcccgtcag tccatcgcta ttctgaaaca gatacgagaa atatccgggc
     9841 atcaggagct gatatttcct ggtgaccata atccgtataa gccaatgtgc gaaaacacgg
     9901 tcaacaaggc tttgcgtgtg atgggttatg acacaaaaga tgaaatctgc ggtcacggat
     9961 tccgagcaat ggcctgtagt gcgctgatgg agtctggact gtgggcgcag gatgcggttg
    10021 aacggcagat gagccatcaa gaacgtaata gcgttcgagc cgcttacatc cataaagctg
    10081 aatatctcga tgcccgtaaa gcgatgatgc agtggtggtc cgattatttg gatacgtgcc
    10141 gggaagccta tgtcccccgt atatccaggg gcaaggtaat agcattaaga ctgaataact
    10201 gactagtcct gattgaggat tgtgcacttt tacctgttca gctaacaacg ccaatagatg
    10261 gcgaaaccgc tcctgaaggc gtaggaaggt tagttgcggg aaagttaaaa cgctgccgcg
    10321 cactcagaac tggtagaagc attcgcttat actctaaacc agtggctggt ccttacgtac
    10381 tatgcagaaa atggctgggc aggatcatct accgggctgg ggtcagtcca gtgccggttt
    10441 cgacctgttt caacgcaaag acaatttgtt cttcggtata atggatcttt ttcatggctg
    10501 atgtgcctct ttgtgagatg aaagaaagac ccgatactcc agtttagcct ggctctgttt
    10561 tcagggagaa gatcagtgaa tgtcattatc aataggacct acggcgatat gacttcgatc
    10621 gctttcatcc acttcccttt tctcacacaa atatgtgaat ccatctgtca gagcgatttt
    10681 tgcatgccag caaggaccta aagataattt gttttgagag tgtgagctag agagggtaaa
    10741 agtggatgcc caacaagaag caacatgata aaaatggcag cgttagaggc acagacacag
    10801 agcgagagaa agaaatttta atgcagggat ttatgtagag aaaaatcgaa aaccttcctt
    10861 aagttattta tttttctcaa ttattggcgg agagaggggg atttgaaccc ccggtagagt
    10921 tgcctctact ccagttttcg agactggtcc gttcagccac tccggcatct ctccgtttaa
    10981 tccgttgtca taatgcccgc ttttacggca ttttaacagc gccctccctc gcctttactt
    11041 aatgagcaat aacaatgatt aaatggccgt ggaaaaacac tcaacctcag gtacagacac
    11101 aggaaaactg gcaaggagcg atttctatcc cgctccttgc gcccttaaat gatgaggaac
    11161 ttcagcaact ggtcaccctt gctgaacagt ttctaaagca aaaacgcctg attccattgc
    11221 aggagttggt gttaacggaa atcatgcaac agcgcatcgc cctattgttt tccttgccgg
    11281 tgttatcgct gggcattgat gctctggatg gctttcacga agtgctggtt taccctggcc
    11341 cgtttattgt cgaggaagag tggcaggatg acatcgggct cgtgcataag ggaaaaatag
    11401 tgcagtctgg gcaaagctgg gatcaggggc cgattgtcct caactggcag gaagtgcagg
    11461 attccttcga tctctccggt ttcaacctca ttattcatga ggtcgcacac aaactggata
    11521 ttcgcagcag cggtgaagca acaggcgttc ccctgattcc actgcgcgat attgcagctt
    11581 gggaacaaca actgcacggc gcgatggatg ccttacagga agaaatcgat ctggtaggcg
    11641 aagatgccgc cagcatggac ccctacgccg ttcacgatcc agcagagtgc tttgcagtgc
    11701 tgtcggaata tttcttcagc gcccctgagc ttcttgaaga gcgctttccc gctctgtacc
    11761 gctgcttcca aaaattctat cggcaagatc cactcactcg gctaaaaaac tggcaaaaca
    11821 gcatcaacta tcatgcacca tctatttact aactcataaa aaaacagcga attgtacaca
    11881 gcctaaacag tcagacgata aagctgattt tgccgttgac agcgccactg gtggcagata
    11941 tcatccgccc cgttcacacg attcctctgt agttcagtcg gtagaacggc ggactgttaa
    12001 tccgtatgtc actggttcga gtccagtcag aggagccaat ttagaaaacc ccgcttaagg
    12061 aaacttaagc ggggtttttg ctatttacca tattagtcaa taggttagcg taaaatatct
    12121 tcccgatgca ttttcagttt tccctccgca tcgggaggat ttggtggtca gatttggggt
    12181 ctttccggtt cgataatgga gtgacccgca tatgtccctt aatgacacta aaatccgcaa
    12241 cttaaaacca tcagcaaaat ccttcgaagt ttccgattct cacggtctgt accttttagt
    12301 taatccaggc ggttcacgtc tctggtatct caaatatcgc atcaatagaa aagaatcacg
    12361 cctcggctta ggtgcctacc ctgatgtatc tctggccgac gctcgtcagc agcgtgacgg
    12421 tatccccctc tgtcagggta gttgtcaccc ccatcgaaaa tactcatgac aagatgggaa
    12481 cagatcgtga aacgaatttc accagaacgt aaagctgctg cactggctaa attactaccg
    12541 ccttacaaca tgaccgtcac cgctgttgca ccgatggaag ggatatcgga agctactctc
    12601 tattactggc gtaacaaggc gaaagcagag gaaataccgg tgccggggcg ggacttgaac
    12661 ccgcacagcg cgaacgccga gggattttaa aaacctgtaa gggagtaatg aaaacaataa
    12721 gttactgtaa ttccactgat tgccgtttct ggttagtgct gtttattttc cttagttacc
    12781 attctgccgc cactttcaca gtggcgtttt tcattcccta acgagtcgtg gaatggccag
    12841 atatagcttt tcaagcaacg catttttatt cacggcatag tgcatggctc tgtggcagtt
    12901 cggacagagt gcggcagcat tttcaacggt atcagaaccg ccatttgcca ggtacttcaa
    12961 gtgatgtacc tcaaggaagg gcaatccgtc agcttgcata aaaggggctg ggttacggca
    13021 gtattcacat acgcctttcg cttcctggag aacgtaggct ttcacttccg gatcgcgtac
    13081 tactgaagtt gtttgcgttg tcttctttgg tggattgctg ttgcctgtcg gcttactctt
    13141 cacacctttt ttacgcagtg cgctaacctg ggcttcaaac tgtttctcag tctgttcccc
    13201 aatcgggtca aggtcatcaa taaactgctt caggcgaggg aatattttag cgccgacgtt
    13261 agtcgctggt gttaagcctg gtagccagtc gcgtcccatt tcttgataga caaatgaaat
    13321 gttttgcatc ctaaattcaa aggatttagc ggtacgggga aaacgtgcgg ccagtgagtc
    13381 gtaatagttt ttcttaatga acgtcagccc aacctggtga aaccgcttca tttcgacata
    13441 ggcttcaact gacgccctta attcttcatc actccagcca gtattctgct gcttttccat
    13501 ttcacaccat ttccaatctg tcatacggat tcaacgtaac ggccgcatcc aggtgatcgg
    13561 gggcaaagtg tgcatagcgc atcgtcatct ggatcgaggt atggccgaga atatctttta
    13621 gcaccaggat attaccacca ttcatcataa aatggctggc gaaggtatgc cgcaaaacgt
    13681 gcgttaactg cccttctggt aaatcaattt gggaacgttt taacgcctgt cgaaaagcat
    13741 cataacaagg gctaaacagt tggccacggc ggcgcggtaa tcgctgataa agctccggtg
    13801 agatcggcac agtgcggtta cgtttccctt tagtattaat gtaagtcaca cggtacggca
    13861 caagctgcga ctgctttagc tcctgggctt cactccacct ggcacctgtt gccagacaaa
    13921 tacgcaccac actaccgaga tcgggattac tagaagcatc acactcgcta agaatgaggc
    13981 gaatatcatc gtgatacaaa aaggctaact cgctgtcact ctctttatac tgacgaatcc
    14041 catctagcgg attatcccct tgccattcgc ccaggcgttt taattcattg aatactgcac
    14101 ttaagtacga atgctcacgg ttgatggtgg attctttcac tggcttatcg aaacgcccaa
    14161 acttaccgtt taaccgctgc ttacggtatt cagcaaaatc agctttcgta aatagactgg
    14221 ctatcggatc gcccaagttc gtacaaagca gctctaattt gcgtaaccgc ccttccccat
    14281 ccgccagaga acggccatgc atatcgaacc agcgttgaac cagttcagat aagttttgcc
    14341 cggcatcttc tgccgcagaa gtatcaatcg atatccccac aaacttgagc tgacgctcat
    14401 aagacagcgc ctcacctttg ctgacaaact gcttacgcag gcgttttccg gttcgccctt
    14461 tcggatatgt ttcactcaac cactttccag tgggtaactt ccttacggcc atcgacccta
    14521 tcccgttatc aaaaacgaga tagttttact gtatataaaa tcagtaatca atgtttaagt
    14581 gtcatctaaa tacactattt ttttaatata cttacttgat gatagtagta ttctttatgt
    14641 ggatgaacat catctcttaa atttatattc attaaattac taaatataga ttcaagtaat
    14701 ttattatcgt atgtaatctt tgaaccagaa gcattcttaa ctttttcttt aatgtagttc
    14761 gaaatcatgc ctgtgagaaa atgccctcta acgcaaatta atggttcacc tttatatttt
    14821 attaactttt tcctgtaact caaatatatc gagtaatcta ttttaccttt agcatttaaa
    14881 ataattggct caactatttt cttacacagt tgaaagccat cttgcttttc taaaaatcga
    14941 aatgaactat cacccattat tttttccccc accccttgag aaaacaaggc ataatcaaag
    15001 gaaaccaatt tgaaaaacaa attaatatta ggctttatta tatctctatc aatggaaata
    15061 taatcatcag gaatgtcttt agccgcaagg cttttaacta ttcctttaag gatatcatct
    15121 gtataatatg tgttctcgat gctatatcca tacgagaaca ttacattaat caaatcttcg
    15181 ggttcatcaa ataaatattt ataatcccta tctctagcaa catatactcc cgtcgcacct
    15241 tcttttattt tttctatata ttcatcaatc accttacagc cattaacaca tttagttgtt
    15301 atattattta taccaaatga gttatataat ccatcccaga atcgcttatc actatctccc
    15361 tcaacaaata caattttgtt tccagaatga aatgcatgta agatattaag agcgttaacg
    15421 gaataagtca gcgatgaagt cattcagcag cttccttcat atcaataatt tttgataggt
    15481 aactgccagc cacttctggt gaatgtgttg ctataattac ttgagctttt ttatttagtt
    15541 tctttattga actaattatt ttagactgcc aacttatatg aagagatatt tcaggctcat
    15601 cagcaatgaa tatattaggc attcctcgct gcaatagaga ttctattaat atagttaaaa
    15661 tctgcttctc tcccgatgag aggtccttaa cattaatttc ttttttatct tcgaggtaaa
    15721 tctttaagtc tccgctgtaa tttatttcga cacttttatt aatgtaaaaa tcatcattta
    15781 ttatttttgt aaaatcacgt aatgaagata attcattttc cgtttctatt ttaaatcgct
    15841 cacttaaatc tacaacttga ttaagttttt catacagcga gagaacaaca acatcctgta
    15901 tcattatccc cttaaattcc ctatctttta aattctttaa aacattattt actgtctgta
    15961 aattatcgtt aatttttttt ctgtatttat tttcattata attctcgatt actcctaaat
    16021 ttttataagc ttgaattaat tcattggatt tatctttaat aacaaaattt tctgatttat
    16081 attttaaatc tcgcctatta aatttagcat caacctcaat caatgtttca acaagaatat
    16141 ctttttgata tttaattgac atttctttta ttttattatt tttttcaatc tgataagact
    16201 ttaaattctc tatttgctct tctagaatag tatcaatgtt tttacttgac accacactag
    16261 atttcaagaa atcagaaaaa aaagcatcat cattactatt ttcatcacca atcttacttc
    16321 tattcgttga tatgccaaca acatttatta tttctttaat aattttattt aactgttcct
    16381 ctgaaacaat acttgcttta gcaggtgaaa catcttttgt tctattatag attaatcgtt
    16441 tagactcatc aggaacaaga agatatccct ctccatcgat atcgtaatat acttccttat
    16501 catagccgtc ttcgttcttc ccaaatcttg ctgcatatat aactttcgta ctgaatggat
    16561 ttccttcatc ttcaagatga attgttattt tatcaaaatt acatttagat ataatttcag
    16621 actttgcatt taggattgaa tacaatatat taattactgt tgtttttcct gtcccattaa
    16681 ttccaatcaa tatatttaca tcatcatcaa atttaaagtt taaagttttt tctccccaaa
    16741 gaccataaat tctaacagag gatattttat acataaaggt caccattaat ataataaaaa
    16801 actaaatgtt tttttcaaca gtaataacaa ccatcccagc gcccttaaca tcatcaatag
    16861 agcactcgaa tttagttgcg ttaccggata cctgaatacg attacctggg atgcgggcta
    16921 cgtcgtacac atccacatcg ccatcaatat ctaaaagcca gcggccattg ctgacctgag
    16981 taacagacat atcggcgatc caggcattgt tgcctttctc tatgaaagcg ggttcggaaa
    17041 cagaatcatc aagcagtgtg ccgtcagcaa tccatgtgcc agcgtcttgt aatcttccgc
    17101 cgacaatcct gatctttttc aatgagatgt aggcactatt aatagcactt tcggcaggct
    17161 ttgcaagatc ttgaaacatt tcgccttcgc ctgtagctaa ccaagttagc gaagctccag
    17221 tctcaagggc gcatcggata actacctctc caggaaagta ttctcttttt atccaagtgc
    17281 taacggtgcc attaccaaca tcaagatggt catgtaactg cttttgcatc gtgaacccat
    17341 aggctttgag gattctttca actacgcctt tcccgccatc aaacttcata gatatcaaat
    17401 tccagtttat ttgattgaca gatatcaatt ttgacattac cttggccaat agataacaaa
    17461 tgatacccac cagtagcata acttaactaa cagaacagaa tgccttatga aaacgccact
    17521 ttcaatcact ctggctacac cgtacgtcac attaagcgaa ttttctcgca tcagtggttt
    17581 acccataaag acctgctacc agtgggtgca ccagggaaag ctgcctatcc gggctaaaaa
    17641 cgctaaaaac gagcgaacca tgattaacct cctggcgcta acaaaagaag ccgaatggga
    17701 agcgcggctt ggtgcataaa ttcaaatttg tgaatttatt atcgatttca atagggattt
    17761 gaccatgttt gattaccaaa tcgcaaaaca cccgcactat gccaatgcgt gtcgcgcatt
    17821 tgccaccagg cacaacctgg ttgaactggc ggaaatggta ggaatgaacc cgcagatgct
    17881 gcgcaacaag ctgaacccgg aacagcccca ccgcttaacg tgcgatgacc tgttgaccat
    17941 cacggatgct tctgaggatt caacgctgat cgacggcttg ctggcacagc ttaattgcct
    18001 acctgctgtt cccgtcaacg aagcgaaaac agaacgcctt accacttacg tgttgcaggc
    18061 aaccgcagcc gtcggcgctg ttgctgcgga aagcctctct accgagcgaa tgagtcaaac
    18121 acggcgaaat tcttttatgg aaagcatcaa ttccggcatt cgctatctgt cgttagtcgg
    18181 gttgacgctg caaaccagaa tacaagccaa tcccgcaatg gcttcaaccg tagatgcact
    18241 gagcgggatc ggagcgtctt tgaatgttgg gtaatgtgaa atagctatca aactatatgg
    18301 aatagtccga tagcacttaa aaattaatta gctgggtgag tttttataag cgtaccgcgt
    18361 tgagtgcgac tactgtcact taaatgcatc tggtcgattg gaacccccgc attatcataa
    18421 aatttggcgt catcaattaa ggacaaaaac ctttcagcat cttcaataca gagcgggcgg
    18481 ttttcaaaaa tacggggact attcacaaca gtattaccac ttttatcaac aatccgccaa
    18541 ttccattctg agcggctttt acaagagata acaatattta tgcacatatt taacgatcct
    18601 tctgaaagtc aaaaatattc cgaatcaata cattgtgccg caaacaattt attagatgcg
    18661 ttcaaagggg gagatacaag aatcgccctt gaaattttag attggatgaa agacgcagtg
    18721 attgcgaact cttccgttgt tgcgactgaa gatgcgatct gtgttaacgc atctagtcct
    18781 tcatttcctt tgaaagtcat cagcataaaa cgtggttgat tgtttttggc gattcaatcc
    18841 taccacaaga ccatgcgccg ggcatggcta aaacccggca cctattcgca accgtctatc
    18901 agtgggcgat taccaatagg caacttaatc aacaactgga gtagtaaaaa tgagtttttt
    18961 tggattcgga aaaaaagtag cagcagcaaa agtcgaactt aaaaaggtcg agaatcgcga
    19021 tctgatggag gcaatcgtgg gcggttgttt gctcgtcgcg gcggctgatg gcgaaatcga
    19081 gaaagaagag acagacaaac tggataagtt gctgcgctct aaccctcagt tggggcatta
    19141 cgggaatgaa atcacccaaa ctatcagccg cttcactgaa cagttacagg caggctttcg
    19201 cgttggacgc atgaacatct tgcgtgaaat cgacgatatc aaaaacacgc caaaagatgc
    19261 cgaagaggtt ttcgttaaca tgctgacgat tgccgaagct gacggagaaa ttgagccaga
    19321 agaacagaaa gtgctggaag aggttggccg ccgcctcggt ctgcgtattg aagattacct
    19381 gtaatgaaca cgttgcgtct ggctggtgtt ctcttgttcg cgtttatggg cgtcgcagta
    19441 gatttttcaa gctatctgct ttctgtcatc agtgatgcgt tattcatcag cgcattagtt
    19501 ttcattgtct ggtcaccgtt aatgaccggg gtggaaaaga aataagcaac ctgtgccggg
    19561 ttagcccggc acctattcgc aaccgtctat ccgtgggcgg ttaccaatag gaggggaaac
    19621 catgcaagca ccaatatcaa tcgcgccgtt cctctggtgg caccagacgg agacaaagcc
    19681 agactttacg atcacccacg gcaaaggccg tcaggggatc atcatccgta cccgctcggc
    19741 aaattatgcc cagcgggtta tccgttctat caagtcagtg atacggggga aagcatgaca
    19801 gcctttaccg tcagcagcat gcagaactta cccgccgggc tgcgcaacgt gatcggcaag
    19861 cactttgccg atagccgctg gcgcgaaacc tgcgcctatt acaacagcct gcatgagcgc
    19921 gatcgtttaa ccatctgctt tcatgcgcag atgaaaaaac gtcacaccgt ttaccgcctg
    19981 gaagaaatgc cgacggctga acgtgagcaa attgtttgcg ccattgatga aatgcgccag
    20041 gcattttcaa aaggtcgcag ccggggcgtg aatatctcaa catttctgag ctggttaagc
    20101 gttagtgaaa gacgaacgtt atttatgcac gcggggttaa ctgaaaaaga gtttaatcag
    20161 ccctattggc gtattgatga taattcgtgt cagtggcgtc aaccaatatt acgtgcatta
    20221 aacgaactgg ctagtttatc tgaagctgcc cccgaaattt tgacggcaat taaacctgaa
    20281 gaatatctga gctaaataac cacctgaaaa taattaggcg cttaaccgcg tcgggactcc
    20341 ctttatctga ggattatatg cacatgtata aaacagtcgg tcaggcaatg caccgcaagg
    20401 ctgaaaacga gggcattcag ttaatgcttt ctcaggcacg caccgaggcg aaagccgatg
    20461 cgcacacgtc tttttcttct cgtctggata agctggcgac tcatgcttct atcaatgaat
    20521 taagcagagt ggaaatcatc gagttattac ggcaggaatc cgaagccttt aataactccg
    20581 ggtcagatat taaggcggtg atgtaatgga aaacccaaat tataaccgcg tcgatatcaa
    20641 cggcaattac gcaatagcga aagtcggcta tgacttcgga ttaggcgaaa ttaagtgcgg
    20701 aaaagaagac ggtgaccaac cgtatttatc cacgctggcc gtttatcaga atcccgtcag
    20761 cctcattaac gattttgtgc atcgtgctat cgccaccgaa atttggcgtg gaaacgttac
    20821 cgacacaaag aaactactaa ccgaaagcaa gcgctttgcc gcgctgtgtc agtcagcctt
    20881 tgaccagctc aacaacgata aggggcaaga ataatgccgg atgctatgga catggtgcaa
    20941 cagcgccagc aagacacttt agaccatcag atcgccaacg cccggaacgt ccagcgcggt
    21001 gtttctgcgt ttgaatgtga agactgcgat cagcccattc ccgaagctcg ccgcgctgca
    21061 atcgacggcg tgacccgttg cgcgacctgc cagggaatcc acgaactgaa aagtaagcat
    21121 tatcggggtg ggctgtgacc tcaatttctt ttacctgtgg taagaaacag atctcagtac
    21181 ctagcgaaga cgtggctttt tacttcccgt caatcgtcga aagcggcgct ttctttgtca
    21241 cgatgaaaga tggcaaacag taccgagcaa cctgtttaag agaaaataca actgcccacc
    21301 ggggcgtgtg ctccggcgct acgctatgaa tcatacccat cgggggcgct ccgctcccac
    21361 cccaccgcca cctttccccg gcagcacccg cgatacgttc gtgggtgcgt attcatggaa
    21421 cgccccacgc ccggcaatcg taccggaaga aagacagctt acccgtgagg aatggactca
    21481 ggggcaagcc gttttagcga aaattaacca gcaaccgcat ttcctgcgtg aaatctgcct
    21541 gaatcgctat gtttacctga aaaagaataa aggccagcta agcgcgaatc gttttctggt
    21601 taacagcttt atgcagcgca tgtggccgcg tatcgaggcg atcaatgccc gccacgctat
    21661 gaatcgcaat gcttccgagc gtttcctgtc tgaatctgac gcctatcaaa cattgtccgg
    21721 catgaatgac aaggcgctgg ggcgtctggc tgcgcgcatt tccggccaga tattttcggc
    21781 gtatgaagaa ttgagcgatg ccatgaaagc ggagcgcggc ggccagcctg atgcgctctt
    21841 taccgatgcg gtacaggccg aacttttcgg ccatgttgcc agcatggcgc gtgcgttcaa
    21901 tatcacccct cttttctgga agaactaccg caaaggcacg ctggatatac gcaaggcaat
    21961 agccagcgtg tctcgcctga ttaatgagga atggtggact cgccagctta aagcccagcg
    22021 cacccgctgg cgtgaagcgc tgatgattgc cgtcggtcag gtcagtaaaa aagcgtcacc
    22081 gtatgccagc aagatggcga tccgcgatgt gctggcgcgt cgcctcgcta acatggatta
    22141 cctgaaaaac tgtgagctgg agaacgtcgc aacaggtgag cgtatcgacc tgatcgacaa
    22201 ggtgatggcg agtatttcta acccagaaat tcggcgtatg gagctgatga gcactatcgc
    22261 cgggattgag cgttacgcca gcgagcaacg agacgtcggg atgtttatca ccataactac
    22321 cccgtcaaaa tatcacccga ctcgcactat tggtaagcgc gacaacgaga aagtccagtt
    22381 taataggaaa tgggacaagg aagcatttac gcccaaagac ggccagcgct atctggtcaa
    22441 gatatggggc aagatgcgca ccgcgtttaa agataatgac ctgaaggtgt acgggatgcg
    22501 cgttgtcgag ccgcatcacg acgggacacc gcactggcac atgatgctgt tttgcaagcg
    22561 cgcacatcgc caatcggtga tcgatattat gcgccgctat gccctgaaag aagacggcga
    22621 cgaacgcggc gcagcaactt accgctttga atgtaaacat ctcaataaag gtggtgccgc
    22681 tggctatatc gctaagtaca ttgccaaaaa tattgacggc tacgcgcttg acggtgagat
    22741 cgataaagac acaggaaagc cgctgcgtga tatggcggta gccgttaccg cgtgggcgtc
    22801 aacgtggcgt atccctcaat ttaaacctat cggtatcccc acgatgggcg cttaccgcga
    22861 atgccgtagc ggcacgttac gcagtgtcaa tcttactgac cagttcgatg aacaagtcga
    22921 agcggttcgc tgtgctgctg atgctggcga tttttccgca tacatggccg cacagggcgg
    22981 cgcgaatgtt tcccgcgaac tgcaaacggt acgtgttgca cgccgggtat cggacaagct
    23041 caacgagtat gacgaagagg tgcaaaaggt ggtcgggatt tttgccccgc atttgggcgc
    23101 gggtcatgtt tttgaaaccc ggacaaccga atggcgcatc gtttctaaag ccgttgacct
    23161 tgatcctttg actttaaaaa gcgcccccgg cgcgcctcgg agtcctgtca ataactgtgg
    23221 gttgggttct caacggtcag gcgaaaatgt caaaacgcag gccgaaaaca gcggcatagc
    23281 gacgacatca gaaaccgata acacaccgat tgactggaat gacgacgcgg ctgtgagggc
    23341 gctaggaatg cgtctacgtg agcaatccgc caggaagaat cataagcaac gcgactttaa
    23401 ccccaatacc ctccgagatc cgtcaccgtc ggccagatta acgggcgaag aacgggagcg
    23461 gatacctcgc attcagcgtg atttattcca gcgcggtatc accactcaac gttgggagct
    23521 ggaagcgctg gcgcgtgggg caaaaatgaa aattgacggt gagcttattt catacccgac
    23581 ggctgatgaa tggccggggt ttagtgagca tttccaggaa tagcttggat accaggctac
    23641 tagcactacg ctgatgtatc agaatcacca ataaaacagt ttaatcttta atatacaaca
    23701 cgttgaataa ttcattgact gccgtttcat tttgaaaaat actgtatata aaaacagtaa
    23761 aaaggaatag tatggaaacc ttagaaaacg cacagcttgc actttctcgt gtgcaattta
    23821 tcgctgagat agcgttagta gctgattgcg acaagaaaga cctacagaca gcgttagcta
    23881 ccatatccca tctggtcgag gtcgaactaa aaacacgtgg cctggtgagt ccaactactg
    23941 tttacggcac caaaaattaa cgccataaag tatgtcgtgc tcatcgcatc gatgtgcatg
    24001 aatttgcatg ctggatccca tagctcaaaa accttatagc cccctgtcct acatggatcg
    24061 cgctggatcg tgcgagtgca tgaaaagcga cacacaaagc gggcaggcgt ggcggggata
    24121 gcattgcgcg cgagggcgtt taggcgtggt tcatcccgca ccgatgcgcc ccgctgtgag
    24181 atgttctgct ttgatatcat gcattgggtt ggttttttac tgaagcgcgt aaaacgcgat
    24241 tggtaagtcc tgaaagggat ataaaaaagc cgctggttag acgattactg tcgcaggaat
    24301 gctctgaaag ttggataact aagctagtgt tgaaattcct cctatgtttt cataattaac
    24361 ttaaagaaag gaggtattgt ggatacgatt gaagagattg gcggtactta tttctatggc
    24421 ggcctgacaa atctttcagc cggagaactc tttttttgga tcatgatcga tgtcaccgca
    24481 gagcatttta cgggtgcgaa agatgtcatt gctgcggctg ctgtctattc ggggcagaac
    24541 aatattcatg tttcaggtaa gtttgcgaac gccacgcccg gcacctcctt agcgtcaaaa
    24601 tactcaagaa aactgctgaa aggctatcaa ttaccggtca gacttcccac ctttgtcagt
    24661 gctccccaga acccatttaa aataaaaaaa ataatgactt tgaagctatc cacttttgtg
    24721 gggcgaacta ttcctgtcat cggctggctt gtgcttgctg tagatgtgtc gctgataggg
    24781 tatgaggcta caacccggta taatcgtatc gcaagcaagg aggatagatt gtggtaaacc
    24841 aaggccaaga tgtagaaaag gaagttttta aactggttga gacttataac ggtagaagtc
    24901 ttttttcacg aaaacgtttt gaattaagac atgataccga tcttaacgaa gattttcgca
    24961 tggcccctga ggatgcctat gagctaatgg aaagctacgt tgataaattc gacataaacc
    25021 cgaaaacgat acattttgag cgttattttc cagaaagttt ctccgaccct catgacccgc
    25081 ttactattca acttctcatt gattctgcga atgctggccg ctggcttgga aaatagatag
    25141 cgcccgcagt aacagacgcc aatcagtttt tatttatccg cgatttccag tgagtatggt
    25201 ttgaaagaga taacctgttc accgacgtag ttattaactt ccttcatccg ttcctgtagc
    25261 ggcgtcagct cgttcctgac aaaaacctga ctcgcctttt ccacatcccc aaaaccgccc
    25321 gtattattcg ggataatccc catcatctgc ggtggtacgc ggtgtgcgct gagcaggtcg
    25381 tcacggctgg cgttcttgat gttaaagaag tcgtctttcg tagcaacctc actgagcggc
    25441 acaatcttta tgccgtccgg cttgccgttg ggtgcgtaga aaaacaggtt cttaaaattc
    25501 cccagccctt tagtgccgtt catcgcggcg cgcaacttgt ccacgtcagt accgctttgt
    25561 gccgcatcgg tcacgtacat gatgtaaccc gcgtgtgcgc cattctggta atacttgcgc
    25621 cggaacagcg tcgcagactc attcagccat gccgagttca acgagctgat atattccggc
    25681 aggccgtaca tttcctgatt gatatccggc tccagcaaat ggaacacgct acccggttca
    25741 aagcggtgcg gctctttgaa tgactgcacg aaccaataaa catcctcttc tactccgcgc
    25801 cgggtgtatt ttgccgggct ggaatctaag cgcaggatgc cgcctgtgcg gttcaggcgc
    25861 ttttcaagaa acgcattccc aaacaccaga taatccagca caaagcggct gaaatcctgc
    25921 tgactcaata gcgggttcgg aataaacgtg ctcaccagaa tgttacgttt cacgtagata
    25981 ggtgagctat ggtgtactgc ggcgcgcagg cttttagcca gcccgctaaa gttgatcggc
    26041 ggctcaatcc acttgccgtt atggatgcac tcggcatagt ccagaatgtc gcggcgatcc
    26101 agaacggcgg acggttcacc aaaagtgaaa gcctctatcg gttgtgcctg gctgacgggc
    26161 gctgattggg atttgcgata tttacgcttt ttcattcgtt aaaatccaaa atgctgacag
    26221 ggacatgacc gttaatcgcg gtcaggggtt cgtttaacag cgcgtgcatg gttgcccatg
    26281 ccacatcggc gtggctgatt tcttcgctgc ggctggcttc ataggtggtg cggttaccgc
    26341 tggccgtcat ggttttacgg atggccataa acgattgggt gatgtcggtg tggctggtgt
    26401 cgtactccag ccgcccgctg gtgatcgtgt ctttggcttt cagcaccatc gcggttttga
    26461 tttctggtga gtatttgatt tcgcgtgctg cggggaagaa gccgcgcaca agctggtaaa
    26521 cgccctgacc gatgcccgtg gcatcaatgc cgatgtattc gacgatatat ttttccgtca
    26581 gcagcttgat agcctcggcc tgtgcggcaa aatccatgcc cttccactgg aagcgctcca
    26641 gaatgcggaa cttaccgccc ggtgcctgcg gcggtgccag taccacacag cccgcgctgt
    26701 cgcccgtgtg tgacgggtcg taaccaatcc aaacgggctt ataggcaaac gggcgcagcg
    26761 cgtaggggtt aaaatcctcc cattcttcca gcgcatcgac catgcagcgc tgtaactcct
    26821 caaacgggaa caccgacgcc ttatcatcga caaactcgca catcagcagg ttttgatact
    26881 ctgccgggct gtattccagc gtgagctggt cgaggtcgaa caggttacag cccccggaca
    26941 acgcatcttc taccgtcaca atctgccgcc actggccgtc accgcacagc acgccgccgg
    27001 acaaattcgc gtggcttaaa tccagatgga ggtgatcggc cttattgctg cgccccttgt
    27061 tgaacagctc acccgaccag aacggataag cgctgtgtgc cagactcgat ggcgttgaaa
    27121 agtacgtgct gcgccacttt ttgtgcaacg acatgccgct ggcgactttg cgcagttcct
    27181 gaaacttggg tatccaaaaa tattcatcca ggtacagatt tccggtgtag ctctgcgcgg
    27241 tgcggatatt ggtgccgagg aagaacaggc gcgccccgtt ggggagtacc atcgggtcac
    27301 ctttcaggtc aacgtcaacc agccgggcaa aatcgatgat gtagttttta aagacgtgtg
    27361 cctgcgcctt actcgctgac agaaaaatct gattgcgccc ggtagtcagc gcatcaatca
    27421 gcgcttcccg cgcaaaatag aacgtcgccc caatctggcg cgatttcagt atattgcgga
    27481 tacggtgctg tagcccggcc tgatgccagc cgcgctggta ctcgaaaatc tcactcagga
    27541 aaatgtcgtt cagcttctcg atagccgact cgctgaagtg gttcttttct ggcgctttgc
    27601 ggtcgccctt gttgcggttg cgaacgttgg gattgagatc ggcctcgtta cccgtctggc
    27661 tgtagcggtt cacccgcgcc agccgctcaa tctgacggcc taacaggtca atctctttgt
    27721 agtcatgccc ctcctttttc gtcttcatga tgagctgaat caaccgcgcc tcaaggctgg
    27781 cttcaacacg cgataccggg gcgatagcgt cccagccgtc gcgctgcttc cagctctgaa
    27841 ctgtcggcgt tttctggttc agcatttccc caatctgacg taccgagaag ccctgccagt
    27901 aaagcaaggc cgcttgtcgc cgtgggtcgc tgatgatggt ggtatcgatg gctgtattca
    27961 tgacggcaag gctacgtcag cgccgaccat caccgcctta agtgcctgtt gtgccagcgg
    28021 ttagcgaacc gtgattgatg gcgtggcctg ttgtcacgcc ggatactcgc cccgacttcc
    28081 cgcaaataac ggatgagaaa atggcaaaga aagtttctaa gtttttccgc gtcggtgttg
    28141 aaggtgacac ctgcgacggt cgcgtgattg acgcgaatga cattcaaaac atggcggaga
    28201 cgtttgatcc gcgtgtctat ggttgccgca tcaaccttga acacctgaaa ggtttgttgc
    28261 ctgacagccc gtttcgccgc tatggcgatg tagtcgaact gaaatcagag acgattgatg
    28321 atgattcggc tatcagtggc aagctggcat tgttcgccaa aatcaccccg acagatgaac
    28381 tggtggcaat gaatgaagcc agacagaaaa tctatacctc tatggagatc cagcccaact
    28441 ttgccaacac aggcaaagcc tatctggtcg gtctggcggt caccgatgac ccggccagcc
    28501 tcggcacgga aatgctggaa ttcagcgcaa aggcaaaact caacccacta gcaacccgca
    28561 aattctcccc ggaaaacctc ttttctgtcg ccaccgaagt gacgctggag tttgaagacc
    28621 tgccggacgt ggagccgacg ctgttgtctc gcatcaccgc cctgtttggc cgcaagcaat
    28681 ccagtgatga cgcccgtttt aatgatgtgc atgaagcggt ggccgaagtt gccggacagg
    28741 tgcagaccaa cgccgatagc gtggagcagc gctttaccca gcttgagcag cgccagcagc
    28801 aggacattgc cacgctgacg caaaagttga gcgccagtga gcagcagtta accgacctca
    28861 aagcgacgct ggacggcacc gaaagcttgt cacagacgcg ccgcccggcg gcgacaggtg
    28921 gcgacggtga agccacgctg ctgaccaact gctaacgggg cgtagccctc aataccctta
    28981 ttcagaacca acaggaaata ccatgcgtaa agagactcgt tttaaattta atgcctacct
    29041 gacccagctt gccgccatta atggtgttga ggtggaaacg ctgagtaaga aattcagcgt
    29101 tgaaccgtcc gtcacgcagt cgctgatgga cgtggtgcag gaatccagcg acttcctgac
    29161 ccgtatcaac atcgtgccgg ttgccgagtt gaccggggaa aaaatcggcc tcggcgtatc
    29221 cgggtcggtt gccagtacca cggatacctc aaacggcgac gagcgtgaaa ccgctgactt
    29281 gctgagtctg gaggcgcgcc agtacaagtg cgaacaaatg aactttgatt tccatatccg
    29341 ttacaacacc ctcgacctgt gggcgcgttt tcaggacttc cagttgcgtt tacgtaacgc
    29401 catcgccaaa cgtcaatcgc tggattacat catggcaggc tggcacggcg tgaagcgtgc
    29461 ggcgacctct gaccgcgcta aatatccgct attgcaggat gtggcggtag gttggttaca
    29521 gaaataccgc aacgaatccg ccaaacgcgt gatgagcaaa gtcgtaggtg aagacggcgc
    29581 ggtgatttcc gagaaaatcc gcgtcggtga gaacggcgat tatgtcagcc ttgacgcatt
    29641 ggtgatggat gcgaccaaca tcatgattga cgaatggcat caggaagacc ctgacttggt
    29701 ggtgatttgc ggtcgccagt tgctgtctga caaatatttc ccactggtca acaagcagca
    29761 ggaaaacagc gaaatactgg ccgctgacgt catcatcagc cagaagcgta tcggcaattt
    29821 acctgccgtg cgcgtgccat acttcccggc caatgccctg atgatcaccc gtctggataa
    29881 cctgtctatc tactacatgg acgacagcca ccgccgccac attgaagagg ttgctaagcg
    29941 tgaccgtatc gaaaactacg aatccatcaa acaggattat gtcgtggaag attacggctg
    30001 tggctgcgtg atcgaaaaca tccagctcgg taagttcccg aaaccacctg aagcggaaaa
    30061 agccgcagag cctgccgcgt caggtactga aacctcaacc gacaacaccg gagtctaaac
    30121 catgttaagc cccgcccagc gtcacatgat gcgggtgtcg gctgctgagg cgtcgcaacg
    30181 ggagaatgat ccgctgcgac aggccaccgg gtacgagcaa atgctgttcc ggcttgcggc
    30241 tgacaaacgc acgttaaaac aggtgcgctc catcgagcgt aaagccgaaa tgaaaagcgg
    30301 gctgttgccc agctatgcgc cgtgggtcgc gggtgtgctg gcaaatggtc gcggcgcaca
    30361 ggatgcggta ttgatgacgg tcatggtgtg gaagctcgat gccggggacg ttcccggcgc
    30421 gctggagatt gcccgttatg cgctccaaca caagctggtg atgccagagg gctacacccg
    30481 tccgacgccg tacctgttag ctgaggaagt cgccgacgcc gcgacccgcg cccataccgc
    30541 tgggcaggcg gtcaatattg atcttctcat tgatacgctg acgctcaccg acgccgaaga
    30601 catgcccgat caggtgcgcg ccaagctaca caaaatcatc ggcctgatct tgcgtagcgg
    30661 caagccggag cacgccctgt ttcacctgaa acgcgccttt cagcttgata gccgaagcgg
    30721 tgtaaaaaaa gacatagagc ggctggaaac tgcgctgcgc aaagcagcgg ccagccgtta
    30781 acccaacgcg ccccgcgccg ggcggcacac aggccggaac ggttatccgt tttctgagcc
    30841 tgtgtccacc gcccacctat tttgaggttg tcatgacgac aatgattttc cccgcgaaag
    30901 cggagttgcg cccggatgcg gtggttatcc ccgtgcctgt gcaacaggat gccgtaatca
    30961 aaaacacctt cttctggccg gacgtggagc cgggaacgct gcgcatactg atgcgactgg
    31021 agaacaccgt cacgccagag cgtctgcgcc atgcggcgtt aaccgcgatt gccgaggtga
    31081 acgccgagtt gttcgagtac cgaaaggcgc aatgggcggc agggtttacc acgctggccg
    31141 aggttcccgc cgagcagctc gacggccaga gcgaaaaaca tcatcactac ctgcgtgcgg
    31201 tcagcgccat taccacggcc acgttatacg agcgttaccg aggctatgac gccagcgcca
    31261 aaggcgaccg caaggccgac gcgctcgacg gcacgattga tgaactctgg cgcgatgcgc
    31321 gctgggctat cagtcagttg caggatgcgc cccgctgcat catcgggcat atctgatgaa
    31381 cgttatcgca cagcagggtg acacgctgga cgccctgtgt tatcgccact acggacgcac
    31441 acagggcgcg gttgagtcag tgttaggcgc taatccgggg ttggctgaat tcggggcgat
    31501 gttgccccac ggcaccccgg taacgctgcc agatattgct gccgcctctg tcgcagaaac
    31561 ggtgagttta tgggattgaa tatggaaaga atcacgtcat ttatcgcgta ctggataagc
    31621 gtggcgctgg cctttttcgg ggcgatgacg ccgcaggatt tcgcggccta tttcggggcg
    31681 ctgggggtgg ttttcaccgt cggtgttaac tggtactacc gccgcaagag ctaccagcta
    31741 ttgaaaacta tcgacagtcc ccgcgaggtt atccatgaaa tcactcgtta aacgctgcgt
    31801 tattgccacg gtattagcac tggccgcgtt agtgccggat ttttccttgc tgaaaacgtc
    31861 accgcagggg ctggcgctga ttgctgacct tgagggatgc cgattaagtc cgtaccagtg
    31921 cagcgcgaac gtgtggacaa acgggatcgg acacaccgca ggcgtggtgc cggggaaaac
    31981 catcaccgag cgtgaagcgg cggtcaatct ggtggccgat gtgttacggg tagaaaaggc
    32041 gctggcgcgt tgtgtggccg tgaatatgcc gcaggccgtc tatgacgcca tcgtgagctt
    32101 tgcgtttaat gtcggtgtcg gtgcggcgtg ccgctctaca ctggcgtttt ttatcaacaa
    32161 aggccagtgg cgcaacgcct gtgatcagct cttgcgctgg gtgtatgtca acggcgaggt
    32221 atcacgcggt attgaaaccc gtcgccagcg tgaacgtgcc gtctgtctta agggggcaac
    32281 atgagcacat tgacccgcgt aatccttgtt gttgctgcgc tgtttatcgt gctgctgttc
    32341 gtgactaagc ggcaactgtc tgacgcgaaa aaattgatta acgaacagag cgaaacgctg
    32401 gttaagcagt cgcttgaact gctggtcagg gatggagtga tcgacgcgtt gcagtccagc
    32461 gcgatacgca acgaacaggc acaggcggaa ctccgcaaga aactgtcaca ggccgggcaa
    32521 ctggccgcgt cccgcgataa aaaaatcacg aggttactca atgagaatgc cgatctgcgc
    32581 cgctggtacg gcactgcttt gcctgacgat attaagcggc tgcaccgccg ccccaccttt
    32641 ggcaaccccg acgcttattt acgttggctg tccgaaagtg gagagctgcc cgataccggg
    32701 cagcagcccg gaaaccaacg gtgatttaag cgcggataac cgccaattgg aaaacgcact
    32761 ggtgagctgt gcgctacagg tcgaaaccac caaacactgt caggaacaac acgatgctga
    32821 aacccaacag cctgcgcagc gccttaaatg acgcggtgcc ggtactgaaa aataacccgg
    32881 acatgctgca tgtctttatc gacagtggcg cggtggtgtc cacgctggcc gcgtcgctgt
    32941 cgtttgagaa tcagtacacg ctgaatctgg ttatcacgga ttttactgac gatatcgact
    33001 ggctattagt gccgattcag gtgtggttac gagagaatca gccggatatc actcatgaca
    33061 gccagggctt tacttacctc gctgacatta acgataacgg tagctgtgat atcagcatca
    33121 gcctgaaact caccgagcgg gtgatcgtca aagaggttga taaagcactg cacgttaccc
    33181 acgcgccaga gccgccgtta cctgttcccg tcgagcgtcc cgtatcgctg tacctcagcg
    33241 gcgagttagt gagccagtgg catgaatgag ctgaaaccgt ttgacgataa gctggccgcg
    33301 ctgatcgcca gcctgtcagc atctggccgt cgaaagctgg ccggaacggt ggcaaaagcc
    33361 ctgcgcggta gccagcagca gcacattaaa gcgcagaccg ccccggacgg cacggcttat
    33421 tccccccgta aagctcagcc gattaaaagt aaaaaaggcc gggttaagcg ccagatgttc
    33481 cagaagctgc gcacagccaa atacctgaaa gccaaaggca cggccgatgc agccagcgtg
    33541 gaatttatcg gacgggtgca gcgcatggcg cgggtacatc actacggttt acgcgatcgg
    33601 cctagtcgta atggtgacga tgtgcaatac gaggcaaggc cgctgctagg gtttagcgat
    33661 cgggagataa aagaggttga aggattggtg ataaagcatc tgagtcaatg aatgaagccc
    33721 cgcgaatgcg gggctaggat tatgcgacgt ctttcacatt ttcatcgcgc tgcgccagaa
    33781 aattttccag cgtggtgatc cggctaattt cttcctgagt gcgcgcgtca ttttccactt
    33841 cccatacgtc aacactattt tgcaggttaa gccagaaatc aactgatgta tcaaacgctt
    33901 tcgccaaccg gaaagccata tcaaccgtta gcttacggtt gttgttgacc aatgcgctga
    33961 tcgtattgcg gtggacgttc agcatttccg ccaggtcatt aatcttcaac cccgtcggtt
    34021 caagatattc atacaacaga acatcgccta cggatgtcgg cttgcgttgt gcctgtgcca
    34081 tagatacctc tcttacttat gatttttgta accgtggtca tccagataaa catcaatcgc
    34141 tttaccatca acccatttaa aaatcaggcg atattggata ttcactctga tggatgagta
    34201 ttcccccaat ggtgggttga gattctcgta tcggttcccc ggtggcgatc tcagatcttt
    34261 tgccgatacc gccgcgttga tgatatccag cttgcgggac aaggatgtaa ccacatcggc
    34321 aggtatcttt ttatgcgact taccatacat aaaaaaatct tccagccact tatcccgaaa
    34381 gctatgaatg ctgcgcattt tttgcattcg tcgctccctc gtttactgtg catatgattg
    34441 taatgcactc atgcactgtg cgcaagtgca taaacaaaac ggttgatttt acctgacagt
    34501 ttccgctatg gtttgctcta cgaggcctag aaacctcttt tcacgcggtc agaaccaacc
    34561 ccgttagtgt tggatttttt atgcctgtca ttcaatggac gcattgcgcg gccacacccc
    34621 gatcaatgtc gggagggcga cgaatacaac acccgcaagg ggaataagtt cgcggtttcg
    34681 tgaagccgtt tctagcctcc cgacaccacc tatggtggtt ttccctagaa agaaatatca
    34741 cgaggtcatt atgactaccc aactatctgt cgaaagcctt tccgttgtca cttacaacaa
    34801 tatacccgtt gttactaccg agctgctggc acaactttat ggcaccacag cacactccat
    34861 cacaaaaaat catcgtagta acgtatcccg ttttatatgc ggcaagcatt actacaaaat
    34921 cacagggaaa gagcttgtag atttgcgagt cacttatagt aacttacaaa tttccgccaa
    34981 aacccgtagc ctcatcctct ggacagaacg cggctcagcc cgtcacgcta agatactgga
    35041 aaccgatcag gcatgggatg tgttcgagtg gctggaagaa agctacttca atccgcaggc
    35101 aaaagccatt cagccactac cgcaaaagcc tgttcaccct tgcgaactgg agttttatat
    35161 tcctgagacg ccgctgatct tcaaccatat ccaaacctcg caactgaatg cgttattcaa
    35221 atcggtagaa tatctgacca tggatttttg gccgcacatg caggcactat ttccaacact
    35281 ggattgcaaa cacgggtcag cagttaatac cgtgaatctg ttgatgcgat tattgaagga
    35341 taagcgtgca gaggcagatg agttgagtaa gcaggactaa gttagatagc cgccccgctg
    35401 gatggcgggg ctacaattaa taaattcatc tgttttttaa attacatata accttattta
    35461 tctttatgaa attcatatag ccaacaaaca taatccctcc aaaagagcca aagaaagcaa
    35521 caagcgtaag atatatagtt gaagatgttc tttcgttatc tatcgctttt tctagctctt
    35581 ttttcatctc accttcgttt gttgttaaat actcacatga aagttttaaa atctcctttc
    35641 tttcgccatt cccgtcacaa tcctttttgt taaaatattt cttttctatt ggatcgtaaa
    35701 tattttcatg agaaattaaa acaacatcat cacgatagtt ataagttgcg taaccaaatt
    35761 tcattggtgg tgaaaaatac attaatgaaa gagcacatgc taagcaaaaa acgaatagac
    35821 cactcattgc aataacgctc attctgtctt gtcggttgac acctaccgct ccaaaaaaac
    35881 cactaaacct aaaatcagtc cttttaattt ctcctgtctt cagtgcttca cataccaact
    35941 cagcatcttt agttgttttt acattaaccc cattaaacag tctgaaaagt tgcgcattaa
    36001 aaaagtcgtc ttcatacgat ttaattttat tatcagaata atccaacctt accgctttca
    36061 gtagtaattt tatgaaaaaa gacacccccc caactcttac catgcataaa accaaggtga
    36121 caaataaaag cgaattctta taaaaatcga ctgaatcaga gaaaacatca aacatggtgc
    36181 ccccaataaa aaggagatta aaaattctaa caatgttgtg tgattgacta ttaaacgtca
    36241 atttattgtc gaatttaatt cgtggcggca acatttcccc catgaaaaca caagccaccc
    36301 ttactgaaat cctgcgcctc ttgcgcaatc tgatccgtgt cggcgtcgtg acccacgtca
    36361 acacagcgga cgccctgtgc cgggtacaaa ccggagacat gaccacagac tggctgaact
    36421 ggttaactcg ccgtgccgga cgttcacgag actggtgggc accgtccatc ggtgagcagg
    36481 tgctgatcct gtccatcggt ggcgaactgg acaccgcctt tgtgctgccc ggcatctatt
    36541 ccgatgccaa ccccgcgccg tcagcgtctg ccgatgcgta tcacgtcagc tttcccgacg
    36601 gtgcggtgat cgagtatgaa cccgctaccg gggcgctgac cgtcagcggg attaaaactg
    36661 ccaatatcac cgcgtctgaa tccctcatcg ccaccgcgcc actcgtcacc gtgagagcgt
    36721 caacccgcat cacgctagac acacccgaag tggtctgcac caacaagctg atcaccggaa
    36781 cgttggaagt acagcaaggt ggggaaatgc gcggcaatat tcagcattca ggcgggtcgc
    36841 tgtcgtccaa cggcaaagtg ttacacaccc acaaacaccc cggagacagc ggcggtataa
    36901 cgggtgcgcc actatgacag tacgttacct cggcatgagc cgtgacagcg gccagacgct
    36961 cagtgacctt gagcacattc gccagagcgt gcgcgatatt ctcatcacgc ccgtcgggtc
    37021 gcgggtgatg cgccgggact atgggtcgct gctgtcggcc ttaatcgacc agccacaaaa
    37081 tcccgccgtg aaattgcagg tgatggcggc gtgttacatg gcgctgctac gttgggagcc
    37141 gcgtatcacg ctgacaggca tcaatctaac cagcgcattc gacggtcagt tgtacgttga
    37201 tatcacgggc gtgctggctg acagcaacgc cgttttcctt tccgttcctg tgagctaaca
    37261 ccatggcaat gattgattta agccaacttc ccgcgcctgc cgtggtggaa gaactggact
    37321 acgaggcgat ttacaccgag cgcaaagcga tgctgctatc gctctacccg gaagaccagc
    37381 gcgccgccgt tgcgcgcacg ttgacgctgg aatcggagcc gctcgtcaag ctgttacagg
    37441 aaaatgctta tcgtgaattg ctgtggcggc agcgtgtcaa tgaagctgcc cgcgccgtga
    37501 tggtggcctt tgcacagggt gatgacctcg accagctcgg cgcaaatttc agcgtgtcac
    37561 gtttggtcat taccccggct gacgattcaa cgttgccgcc cacacctgca ctgatggagt
    37621 ctgacagcga ttttcgcctg cgcattcaac agtcgtttga aggactgagc gttgccgggt
    37681 cggtcggtgc ctatcagtac cacggacgca gtgccgacgg gcgtgtggcc gatgtatcag
    37741 ttatcagccc cagcccggcc agcgtcaccg tgtcggtact gtcacgcgag ggcaacggca
    37801 gcgcaagcca agagttggtc gctatcgtgg ccgctgcgct gaacggtgaa gacgttcgcc
    37861 ctgtggcaga ccgcgtgacg gtacagtctg ccgccattgt gtcgtatgag attgacgcca
    37921 cgctgtacct gtatccgggg ccggaacaag agcctgttcg cgccgctgcc gaacagaagc
    37981 tgaaagccta tatcagtgcg cagcaccgat tagggcggga tattcgtcgc tcggcgattt
    38041 acgctgcgct gcacgtcgag ggcgtgcaac gggtcgagct gacgacaccc gccgccgata
    38101 tcgtactgac tgacgctcag gcatcctatt gttccggtta tcaattgcgt gtaggcggtg
    38161 ccgatgagtg atagccgcct gctgcctgtc ggatcgtctg tgctggaagt cgccgccgcg
    38221 aaagcctgcg ctgagattac ccgcgtaccc gttcccctgc gtctgctgtt gaacccggac
    38281 acctgcccgg cacacctgct gccgtatctg gcgtgggcgt tttccgttga ccgctgggat
    38341 gaggcatggc cggagagcgt gaagcggcag gtgatccgcg atgcgttctt tatccaccgt
    38401 cataaaggca ctatcggtgc gctgcgtcgc gtggtggagc cgttcggcta cctaattcgt
    38461 attatcgaat ggtggcaaaa cgacggcaca cccggcacgt ttcggttaga tatcggcgtg
    38521 caggatagcg gcatcactga ggaaactttt tacgagctgg agcggttgat tgccgacgcc
    38581 aaacccgctt cccgtcacct gctggggctg aatatcaacc tcgacacaca gggcgcggcc
    38641 tatgttgccg ccactgtcta ctgcggtgat gacctgacgg tataccccta tttccctgaa
    38701 aacatcacgg tgtccggtct gaatgtgacc ggagcagcac ttcatttaat cgacaacatg
    38761 agcgtaaccg catgagcgca acctattttg ccctgttaac gaacatcggc gcggccaagt
    38821 tggctaacgc caccacgctg ggaagccgcc tgaacatcac ccgcatggct gtcggtgatg
    38881 gtggcggttc actacccgtt cccaatccgg cacaaactac gctgatcaac gaaaaacgcc
    38941 gggcggcact gaatacgcta agcgttgccc caaaaaaccc cagccagatt attgctgagc
    39001 aggttattcc cgaaaatgaa ggcggcttct ggatacgtga gatcggattg tttgacgacg
    39061 atggcaatct gattgcggtc gccaactgcc ccgaaaccta caagccccaa ttgcaggagg
    39121 gcagcggccg catccagacc gtgcgcatga ttttgattgt cagcagcact gacgcggtga
    39181 cgctgaaaat tgatccggcg gtcgtgttag ccacgcgggg ctatgtcgat gaggtgattg
    39241 aggcacacga aaaaagccgc aaacatccag acgggacgct gacggcaaag ggattcgtgc
    39301 aactgagcag cgcgacaaac agcgacagcg agctactggc cgcaaccccg aaagcggtaa
    39361 aagcggcgaa tgataacgcc aacgggcgtg taccgtctgg ccgtaaagtg aacggtaagg
    39421 cgctaacggc tgatattgcg ctaacggctg gcgatgtcgg cgcgtatacc aaggcggaaa
    39481 ccgacaccaa agtcagtgcc gccacgaccg ccgccagtaa tgccgcgacg gcggcgagca
    39541 gcgccaacac caatgctgaa agccgtgtgc cattggcgcg caaggtgaac ggcaagccgc
    39601 tgaacgctga tattacgctg ggtgctgggg atgtcggcgc atataccaaa ctcgaaaccg
    39661 acacccgcgt cactgctgcc acaactgccg cgaataatgc cgctacggca gcgaccaacg
    39721 cgaataccaa cgccaatggg cgtgtgccgt ctggtcgaac tgtcaacggc aaagccctgt
    39781 ctgctgatat cgcgctgggt gcaggggatg tcggtgccta taccaaaacc gaaaccgaca
    39841 cccgcgtcac tgctgccaca actgccgcga ataatgccgc tacggcagcg accaacgcga
    39901 ataccaacgc caatggccgt gtgccgtctg gtcgaaccgt taacggcaaa gcgctgacgg
    39961 cagatattgt gctgaatgcg ggggatgtgg gggccttaac cgatacacag gccgcgcaaa
    40021 aatatgcgct acgttcaatt aaaatcaacg gaaagccgct gtctgctgac gtcaatttat
    40081 tagccagtga tatcgatacg tggaataaaa cagaatcaga tgggcgttat ctgatgaaga
    40141 cggcgactgc tgccgcagcc acaaaattag cgacgccgcg taagattaat ggcgtgccat
    40201 ttgatgggtc aaatgatatt accctgactc ccgcaaacct cggttttggg gaagtgtggt
    40261 tttccgagcg gcaacgtatg atcctgaatg agccaatcat aattgaacat cacatatctg
    40321 aattgaatgt cgattcatgt attacagacg tgatgatcgt gtgtattgcg tcaatcgggg
    40381 cgtacagtgt gggggatgta ttgatgtgcc cagccgcgct ggtttcaatt gcaggcgcat
    40441 cacgatattt accgttaacc gcaggggtgt cgaaaacgca tattcaattc aatgtcccca
    40501 accgtggttt ttttggcggt gataaattat ccggcggcgg gattattatc ggaacacaaa
    40561 atgaattgga taactgggcc gcagttttaa aaataattaa tttttgaaaa ttagtagttt
    40621 atagcggaac ggggaaggtt aatctcaccc gtgccgccca cggaaaatat tattttccaa
    40681 ttgccatcca atatatcgga tcgccgttag gcataccgac accgatatag aattcgcttc
    40741 tgctaataat gtatgcagca gtgacagatc catcccatgg ggagctggtt cgttttaatg
    40801 tagccgtcaa cgaaaaacac tgggcaggga atggaatagg gaatacgttc gcgccttctg
    40861 ttgatacgcc ccactgaacg atcaatcccc ccggaaattt ttgataacca ctttcactta
    40921 aaagcgcctc tccaaaaccg agattttaaa gaattgatcg ccacagccga tcaataacga
    40981 aaaattgatc tgtataaacg tttataaaac aaccgaccca gatgtcatta tgtgtatggt
    41041 tttaaaacaa taatgatatc agggaaagcg aagcccactg tttgccaggc agtgggcttt
    41101 tttcatgcct ttttcccaac tcgatgttgt gccagtcgcc accgtacctg cattactcgc
    41161 ccacattctc cccgcgccag acaatagccg ctcctaatca gcaatcgtgc tattagctgg
    41221 agcctgaatg tatgagtgat tttcaccacg gcgtgcaggt cgtcgagatt aacgacggca
    41281 cgcgtgttat ttccaccgtt tccaccgcga tcatcggcat ggtgtgcacc gcacctgatg
    41341 ccgacgcggc cacctttccc ctcaataccc cggtactgat tactaacgtg ctgtctgccg
    41401 ctggcaaggc cgggaaaaaa ggcacgctgg ccgctgccct gttggccatc gccgaccagt
    41461 ccaagcccgt caccgttgtg gtgcgcgtgg ctgagggcaa agacgaggcc gaaaccatca
    41521 gcaatgtgat cggcggcagt gacgaaaacg gcaaatatac cgggatgaaa gccctgttag
    41581 atgccatgtc ggtaacgggc gtgaagcccc gcattctcgg tgtgccgggg ctggactcgt
    41641 tacccgtagc cactgcgtta gcgtccatct gtcagtcact gcgtgccttt ggttacgtta
    41701 gcgcatgggg ctgtaaaacc ctgtcggatg ccatcaacta ccgcgagaat ttcagccagc
    41761 gtgaattgat ggtgatctgg ccggatttta tcgcgtggga caccacggcc aacgccagcg
    41821 ccacggcgta tgccactgca cgcgctttgg gactgcgcgc caaaatcgac caagaaaccg
    41881 gatggcataa aaccctgtct aacgtcggcg tgaatggcgt gacgggcatc agtgcatcag
    41941 tctattggga tttacaggca cccggcaccg atgcggattt gctgaatcag gcaggcgtca
    42001 ccacgttggt gcgtaaagac ggattccgct tctggggtaa ccgcacctgt tctgacgatc
    42061 cgctgttcct gtttgagaac tacacccgca ccgcgcaggt gctggccgat accatggccg
    42121 aagcgcacct gtgggcggtc gataagcccg tcaccgccaa acttattgac gacattatcg
    42181 aaggtatcaa ggccaagttc cgcgagctga aatccggtgg ctacattatc gatgccgatt
    42241 gctggctgga tgaaaccgca aacgataaag acacgctcaa agccgggaaa ctgtatatcg
    42301 actatgacta tacccccgtt ccgccgcttg aaaatctcac cctacgccag cgcatcaccg
    42361 ataaatatct ggtgaatctg gttgcgtcgg tcaacagcta aggagctagc gctatggcac
    42421 tgcctcgcaa tctgaaattt atgaacctgt tcaacgacgg catgagctac atgggtgtcg
    42481 ccactgccgt tacgctgccg aaactcaccc gcaagctgga gaattatcgc ggcggcggca
    42541 tgcccggcag cgcgcccatc gattttgggc tggatgatga tgcgctgtcg atggagttta
    42601 cgctcggcgg ttttgctgac gaaaccctgt ggagccaata cgccgcaccg ggcgctgata
    42661 aagtgttgct gcgctttacc gggtcatacc agcgcgatga caccggggaa atttctgccg
    42721 ttgaagtggt gatgcgtggc cgtcacaaag aaatcgacgg tggcgagagc aagcaagggg
    42781 aagccaccga aaccaaggtg tcaaccaaat gcacctatta caagctgacc attgacggca
    42841 aagagatgat cgaaattgac accatcaaca tgattgaacg tgttatgggc gttgaccgtc
    42901 tggaacagca ccgccgggca attggtctgg tgtaaccctg tctggtcagc cccgtgctga
    42961 ccgtcccttt ttaccttgaa tacagagata acctcatgaa cgaacacgac aacattgtga
    43021 cacttgacac cccaatcaaa cgcggcgaca ccctgatcga gacggtcact ctgattaaac
    43081 ctaccgccgg aacactgcgc ggcgtcagtc tggcggccgt ggccgggtct gacgtagacg
    43141 cgatgattaa ggtgctgccg cgtatgactc ttccggcgtt gactgaggcc gaaatcaccc
    43201 gcatggaact gccggatatg attgccattg caggcaaggt gatcggtttt ttgacgccga
    43261 aatcgcaaca gggaacctcc cccgaagcct gacggtagat gaactgatgg cggatatcgc
    43321 ggtgattttt cactggccgc catccgaact gtacccgatg agcctcaccg agttgatcct
    43381 gtggcgcgat aaagcgctca aacgtagcgg acatgccaat gagtaacagc ctacaactca
    43441 gcgtattgtt gcgcgccgtc gatcaggcga cgcgcccgtt tcgtgccgtg caaaatgcgg
    43501 cacgaaccct atccggtgaa attcagggtt cacaagagca gttgaaaacg ctggaagcac
    43561 aggccaagcg cattgaggga ttcagaaaga ccagcgcgca actggcaatc acgggtcagg
    43621 cgctggaaaa agccaaggcc gacgcggccg cactggcgat ggcgtttcgc aataccacta
    43681 accccactcg cgcccaaacc aaagcgctgg aggaggcgcg tcaaaaagcg gcggaattac
    43741 agacccagca taaccgcctg cggctgtccg tgcagaacca gcgcagcgca ctgcgtgccg
    43801 ccggcatcga tacgcgcaat ctgtctgccg cagagcgcca gcttagaacg aatattgctg
    43861 gcgctacaga tacgctgaac cggcagcggg cagcgctggc gcgtgtgagt cagcaacagg
    43921 aaaagctgaa cgcggtcagc aagcgttatg agcaaggcaa agccatcacc gccggggtgc
    43981 gtaataccgg ggcggcagca tttggcctcg gttcagcggc gctgtatgcc gaaagccgat
    44041 tgattgcgcc cagcgttgaa gccgacggac acggggcgcg tatcgccgca caaacgggcg
    44101 gcaatgcggc tgacggcaaa cagtacaccc gcattattaa ggaggttaac gcctctggcg
    44161 tgagtaacga tctcactcag atagccgacg cggtggccgc agtgcgcagt acattgggga
    44221 cgctgggcga tgtgggggaa accgagctgg cgcggatatc gcgtaaagcg ctcgacatgc
    44281 aggcggcgct aggcggtgag gcaaccgaga gtatccagat tgcggcgatc atgatgaaaa
    44341 acggcctcgc taaaaacagc gacgaggcgt ttgatttaat ggtatccggg atgcaacgtg
    44401 tttctgcaca gatgcgcggc gaactgccgg aaatcctgca cgagtattcg acccacttcc
    44461 gcaacatggg attcagcgga tcggaggcga tgacgctgct ggtcgagatg gcgcagcaag
    44521 gcaagtttgc gctggacaag accggcgatg cggttaaaga gttcagcatt cgcgggtcgg
    44581 acatgtcaaa ggccagcatt gaagcctatg acgctgccgg actcaatgcc gccaaaatgt
    44641 ctaccgctat cgccagcggc ggcaataagg cgcgggcggc aatgcagaaa accgcacagg
    44701 ggctgctgaa aatcaaagat ccggcagagc gggcgaatgc cgcgattgcc ctgtttggta
    44761 cgccgattga agacctgtcg attgaccaga taccgaaatt tttgaccgca ttggccggag
    44821 ctgaaaacaa gctgggtgat gtgtccgggg cggctgaccg catgggcgat accctacgcg
    44881 ataacctcga aggcgatatc gggcggctgc gcggggcgat ggccagcctg cggtttaacc
    44941 tgttcaatga cgacgacggc atactgcgta aactcacgca aagcgccacc gcctggctga
    45001 accgggttaa tgaatgggtg aaggctaacc ctgaattggc gcgccagatt gtgatcgtgg
    45061 ctggcgcggc aacggcattg attacggtgc tgggcgggat cgggctggtt gcgtggccta
    45121 ttatgagcgg gattaatgcc ttggtcgccg gggcgggctt gctgagtgcc ggattcgggg
    45181 cgctcagtag cccgttgacg gttatccggg gcgcgatgtc aggttttggc cgggtgctga
    45241 tgtggctgtt cacctcaccc ttggcactgt tgcgcaccgg gatcatgttt attggcagcg
    45301 cattaggcgt cctgctgtcc ccggttgggc tggttgtcgc ggccattgtc ggcggcgcgc
    45361 tgcttatctg gaaatattgg gaacccatca aggcatttat cggtggtgtg gttgcggggt
    45421 ttgttgcagc cagtgcgcct atcattgcgg cgtttgagcc gttacagcct gtctttacat
    45481 ggataggcga caaaataaag gcattgtttg gctggttcgg tgacctgctg acgcctgtca
    45541 aatctactgc cgccgagctg gacggcgcgg ccaatatggg gaaacggttc ggtgaaatgc
    45601 tggcaaaggg gctggatatc gcaacgatcc cgatgaggtc attgatatca ggcgtgtcgt
    45661 ggctgctaga aaagctgggg ctggttgatg agaaatcgaa gaagcttccg actgctgaaa
    45721 atatcatgcc gccgaaggaa gccgccgcgt tacaagctgg cgtcagtaac gcaccaaccc
    45781 cgcagggcaa cgacgcaaag gcgattgcag cccgatacag tggtgtacgt gacaacggcg
    45841 gcgggatcag gttgggagaa tttgccgttg tcggtgaaca tggtcctgaa atcgttgagg
    45901 gtccggtcaa tgtgaccagc cgtaaaaaaa cggcggcgat ggcgtctgct gcaatgagca
    45961 tgtcagccta tcgcccgata gcgccaacgg ttcaagccag cccggcatca tccccggtca
    46021 gcattcatgc gccgattagc attgttgccc agcccggcca gagtgcgcag gacatcgcgc
    46081 aggaagtcac acgtcagctt gagcagcggg aacggatggc gcggtcacgc gcattcagtc
    46141 agtacagtta tcagggaggc gaataagatg atgctcacat tgggtctgtt tgtgttccag
    46201 ctccagaccc tgccttacca gaacatgcag cgcaacgttg attaccgctg gccgtcaaac
    46261 agccgcgtcg gtcagcgccc ggcgttgcag ttcttaggta ttgaagagga aaaaatcacg
    46321 ctgtcggggg agttgctgcc ggaaatcaca ggcggcacgc tgtcactgtt gatgctggaa
    46381 acgatggccg atcaggggcg tgcatggccg ctgattgagg gtagcggcac gatttacggg
    46441 gtatttgtgg tgaacagtat cagcctgacg aaaaccgagt ttttccctga tggccgcgcc
    46501 cggcggattg agttcaccgt cacgctgacc cgcgtagact cgtcactgtc tgccgtgtta
    46561 ggtgatttac gccagcaggc cgacggactg atcggcagcg ccggggaaat ggctaaccgg
    46621 gcacaatccg ctatcggggg attattcgca tgattaaccc gctgaatgtt cgtgcgggca
    46681 gtaaaaccgc cccggcgtac ctgctgcgac tcaatgagca ggacattacg accgttatca
    46741 ctccgcgcct gctatcactg agcctgaccg ataatcgggg ctttgaggcc gaccagctcg
    46801 acatcgagat ggacgacagc gacggaaaga tgcagttacc ccgccggggc gcggtgctgt
    46861 cggtgttttt gggctgggaa ggtgaagcgc tgatcggcaa aggcgatttt acggtggatg
    46921 aaatagagca ccgtggcacg ccagatacgc tgaccatccg ggcgcgtagt gccgattttc
    46981 gcgggtcact gaacgcccgg cgtgagctgt cgtatcacga caccacgctg ggtgcgattg
    47041 ttgaacaggt ggcgaagcgt aacaaccttg cgccgatgct ggctgacgga ttcgcgggga
    47101 taaaaattcc gcacattgac cagactcagg aaaccgatgc ggtatttatt acccggctgg
    47161 ccgagcgcaa cggggcgatt gtggcaatca aggccgggcg tttgctgttc atccgtcccg
    47221 gaacggggaa gacggccagc ggcaagccca tcccgccgca gattattgaa cgcagcgacg
    47281 gcgatcagca cagttttagt ctggctgacc ggggcgcgta cacaggcgta acggcaagct
    47341 ggctgcatac caaagagcca cagcctgaaa agccgaaaac ggtgaaggta aaacgtcaga
    47401 aaaaagtgtt attacatcaa ggggcacagc cacagaagac acaccctaaa gcgaaaaagg
    47461 caaagaagga gccagaagcc cgcgaggggg attatctggc cggcaccgat gaaaacgtgc
    47521 tggcgctgac cacggttttt gcgactaagg cacaggccac gcgtgccgca caagctaagt
    47581 gggacaagct gcaacgcggt gtcgcggagt tctctatcac gttggcaatg gggcgcgccg
    47641 acctgttccc ggaaacgcct gttcaggtga gcggattcaa acaggtgatc gacgaacagg
    47701 aatggacaat ctcaaaagtg acgcacagtt tgagtaattc agggtacgtt accgcgctgg
    47761 agttggaggt gctgctgtct gatgtggaat atgagggaag tgagtaggat taaaatcaat
    47821 tttttgaaca aaattccatt atttgaatta aatggtaata ttagatagaa aaaagccagt
    47881 taaggataag attatgatgc attgcccact ctgccgacat gctgcccatg ctcgttcaag
    47941 ccgttactta agcgaatcca cgaaagaacg ctatcaccaa tgtacaaaca tcaattgtgg
    48001 ccatacgttt gttacgcttg aaagcgtcac tcgctctatc gtggaaccag ggaagataaa
    48061 cccagtgacg ccccaccctg cttctaataa gcaattccag atgtgggtat aatcagtaaa
    48121 aatgaataat tagtaaaaga caggccttaa taaataactc atctttcagt cataagaatg
    48181 actatttatc ataagctcaa aataagcgtc gccactctgc cgccattttg tcgccacttg
    48241 ccctttttca gacacaaaaa accgcctttc ggcggtctac gacattgcac ataagtgctt
    48301 gttttaattc tttttaaatc aatggtgccc ggggcgggac ttgaacccgc acagcgcgaa
    48361 cgccgaggga ttttaaatcc cttgtgtcta ccgatttcac cacccgggcc aaaatattgg
    48421 aggcgcgttc cggagtcgaa ccggactaga cggatttgca atccgctaca taaccgcttt
    48481 gctaacgcgc caaaatacca agtcttagtg actaacatcc gctattgccg atgttttaaa
    48541 ttggagcggg aaacgagact cgaactcgcg accccgacct tggcaaggtc gtgctctacc
    48601 aactgagcta ttcccgcaac acagaactta ctgatttgat taacttctta caaatcagcg
    48661 tcgctgtcga tgcggtgcat tctactgacc tgacgcgatg agtcaacaga attatcaagc
    48721 aatcgcattc gtttgctggt ttttacggcg cttcgatcaa ggttcaagca aatcgtggcg
    48781 cgcagcgttc aaatactgaa acatggacca gaaagtcagc acggcagcga tgtacagcgc
    48841 gacaacgcca ataccttcaa caatgcgttc tggtcgccat agcaaagcaa aaagcgccat
    48901 catctgagct gtggttttta ccttccctat ccacgacacg gcaacgctgc ttcttttgcc
    48961 aatttcagcc atccactcgc gtaatgctga aataatgatt tctcgtgcga tcatcgttgc
    49021 agcaggcagt gtaatccacc aggaatgata gtattccgca accagcacca acgcgacagc
    49081 taccatcact ttatccgcaa caggatcgag gaaggcacca aaacgcgtgg tctgtttcca
    49141 gcgacgagca agaaaaccat caaaccaatc cgttactgca gcaaacacga agatcaacgc
    49201 gcaaagcagc ggtgcccaga cgaatggaag ataaaacgcc agcacgaaaa acggaataag
    49261 agcaacacga aacagggtaa gcaacgtcgg tatattaaat tgcatagcgc ttaggtaact
    49321 atctggctgg agtggatact aggagtatgt tgctacattg tccctagtgt ttcaatgcat
    49381 ggaagatttt ttctgccaat gcatgtgaaa ttcctggaac atttgcaatc tcctcaatgc
    49441 tggcattcat caaaggctgt aaccctccca tgtattttag cagggtttgg cgacgcttag
    49501 ggccgacacc ttcaataagt tccagcgtac tagtgttttt cacttttgct ctcttcttgc
    49561 ggtgcccgcc aatcgcatgg tcatgcgaat catcacgaat atgctggatg acgtgcaacg
    49621 caggagaatc agcgggcagt gctacgccct cacccgtcgc ctcaaaaaac agcgtttcca
    49681 gtccggcttt acgatcgctg cctttcgcga cgccaagtag cagtggcttg tttttatccc
    49741 acgatacctg caacgagtca aatacggact gagcctggct gagttgccct ttcccaccat
    49801 cgatcacaat gacatctggt attttgctgt catccaacgc cttgccatac cgacgtcgta
    49861 ggacttgtgc catagcggca taatcatcac ctggcgtaat cccactgata ttatagcggc
    49921 gatattccga acgtaacggg ccgttggcgt caaataccac gcaggatgcc accgtttgct
    49981 cccccatcgt atgactgatg tcaaaacact ccatccgatg tatttctggc aactgtaaga
    50041 cgttagccaa tgtagctaaa cgctgatgaa tcgtggattg ctgagacaat tttgtgacca
    50101 gcgccgtggc agcattcgtc cgagctaatt ttaaataacg cgcccgatcg ccacggggct
    50161 tcgtttgaat ctgtactttt ctgcccgcca ctgccgtcag agactctgtc agcaaatctt
    50221 tatcgggcaa ggtgaaatca agcagaattt cggtaggaag cgttcggcct aagttccctt
    50281 gtaaatagaa ttgcccgaca aaagtttgca caacttcccc caattccgta ccgccaggca
    50341 ctttggggaa atagctccgg ctaccaagta cttttccctg tcggatgaac agaacataga
    50401 cacaagccat gccagcatca aaggcaacgc tgataacatc caagtcttcg ccgtcaccgg
    50461 aaacaaattg tttttccgtc acccgacgaa ccgcttggat ctgatcgcgt atccgtgcgg
    50521 catcttcaaa atgcaactcc cgactggccg cctccatccg gaaaatgagc ttattcagca
    50581 cttgctgatc tttgccggac aagaacagac gaacatactc aacctgttgc tgataatctt
    50641 cttcgctaac caaaccgcta acgcaaggcc caaggcagcg cccaatttga tattgcaggc
    50701 aagggcgaga gcggttgcga tagacgctgt tttcacactg gcgtaccgga aacagttttt
    50761 gcaacaatat tagcgtttca cgcacagcat tgccgttagg aaacgggcca aagtattcac
    50821 ccttcgcatg cttagcgcca cggtggatcg tcaggcgtgg atgagcatca ccgctcaaaa
    50881 aaaccatggg ataggattta tcgtcgcgta acaagacgtt ataacgcggc tgataaagct
    50941 tgatgtagtt gtgttccagc agtaaggctt cagtttctgt atgcgtgatc gtgacatcaa
    51001 tatgcttgat gcttttgacc aatgcctcgg ttttacggct agcgacatga ctgcggaagt
    51061 agctggcaag tcgttttttt aagtcttttg ccttaccgac atagatgacc gtattaccga
    51121 catcgtacat ccggtagacc ccaggctggc tcgttaccgt ttttaaaaat gccgaagcat
    51181 cgaaactctc actcactact taacaatgtc tccgcggtaa aaagcccgtg cttgatagcc
    51241 agatgcgtta actctacatc accgttgata ttcagcttgc taaacatacg gtagcgataa
    51301 ctgttcactg ttttagggct aaggttgagt tgatctgaga tttcagtcac cttctgcccc
    51361 ttagttatca ttagcataat ctgtaattcg cgttcagaca aacactctag tggtgcatct
    51421 gtctgcggtt ccagttggct taatgccatt tgttgcgcaa tatcagaagc gatataccgc
    51481 ttacctgcat gtaccgctcg aatagcgcaa atgacctctt gaggagcagc agctttacta
    51541 acatatcccg cagcgcccgc ttgcatcact ttagcgggca acggattttc ggtataaata
    51601 gtgagcataa tgactttgat atctggcata aatcgcagga tcttacgtgt cgcttcaagc
    51661 ccaccgatac ctggcatgct catgtccatc aaaacaacat cgacatcatt gcttcgacac
    51721 catttgacgg catcctcacc acagcatgcc tcaccgacca cttttagacc tttgatatcg
    51781 tcaagaatgc gtcgtatccc tgcccgcacc agttcatggt catcaacaag aaaaacgcta
    51841 atcaaagata attctccaaa aaagggagta acacttacat gaaaagttgc ttgcaggtga
    51901 tactacgttg atttcaaaaa ataatgaaca ctggcttata tgaatatgta ttttaaaata
    51961 taccgagaag gaataaagcg cactctcgat cataacaata tatcgttaac ctgagggcgc
    52021 atgctgatca cactcttaac atttcaaata cgctacgcag tataaaccgc ttgatgacac
    52081 aaaatgtgta gaaaacaaat ggcatacaat tggctttata tcttgaatgt caacgaaaaa
    52141 tcattattgt aatcaggatg tgattacaca ttccatcatc gcctacaacg atattataca
    52201 aataatatat tcagagaaaa gcgtccatag tgaacatcat atgtattagg cgaaacacat
    52261 ctatagcctt tgccacaaaa caacatccaa aatatagacg ctattccaat cagttaaatg
    52321 cataaaaaac agtcactaaa atggcgttat ccacgaataa tatcaatcca caatatgctt
    52381 tatgttatac tccccgttat ctgattctgc ctgtcgtgtc agcggtaacg ccgcagcagg
    52441 cgaaggaaaa cacctttttt cttgttgagg agaaaacatg agcaacgtag atttttctac
    52501 taccgcatcc gctgagaccc tagcccatga ggttacctgt ctgaaagcga tggttacact
    52561 gttattaaaa gcaatcggcc aggcggatgc aggtaaagtg ataatcaata tggaaagata
    52621 tattgctcaa ttggaagacg tcgagcaagc agccgtattt gacaacacga ttaaacaaat
    52681 caaaaccagc taccgaaaat agcactattt gccacaccgc catctcagta atttgatctg
    52741 gcggtgtagt gatatttagc ataccgtttt tgatttaaaa aatagagacc ctcgtctatc
    52801 tatttccgat actgataagt ttcagaagca gcgcctcttc tttcttttta tactgcgtta
    52861 attccatcac caacgcctta cccaggagtt gtttccgaga gagcgctttt ctttcatcaa
    52921 ccagctccct caactcggtg aagcactcat ttattttgta ctcttttgaa ctttccgtac
    52981 aaattatctc atggattgcc tggctcagtt cagacaatga gataactgat tttgggtcct
    53041 ggtaactttt ttctatgaca gccagtaatt tttcgaatcc catatgaatc tccgaaatca
    53101 agcagacact tgcttattgc taatcaggaa actccagcga cttctaaacg ccgccccagt
    53161 ggatgtaaac actaccctgt gcaaattcgt aacatcatat acgatctatc gactattcca
    53221 cttgttagca tagcaccttc tcgaaactca tcaggatgca tgaagcacat cttgaccgag
    53281 cggaacaata atttttagct ataccctaaa caattcgagt tccaagacaa aacattagcg
    53341 ctttgaacag cgcgaagcgt taccccttta gggtaaatgt tcagtcatgt gtatcgtaac
    53401 gcggtaagcg aagaacaaat tcgtcgggaa cgaattttac caatcaatag ctgaccttcg
    53461 gtgagaaaca ggctgtctct catttcatac cgataagctt actcaggtaa gtgattcgag
    53521 tgagtgaaaa tcggccagca gcagcggcct caacgggcga ggcccgcgta agtaaatcaa
    53581 gttgagttaa gaagccaaca cacatgcaac ttgaagtatg gcgggtatat accaccaatt
    53641 ctctatattt cttctcgacg ttaatacaca atatgaataa aagacacacc aaaggccatc
    53701 ggatgtatta aatgggaaga atcttgaaat taaatgaaaa ataagaatta ataagagaaa
    53761 atgaaattaa agtgcggata tatatagatc aaaatcaatc caaaaaactt ggatcaaaaa
    53821 tcttaactgc ttgaaattgt tggtgggtcg tgcagggttc gaacctgcga ccaattgatt
    53881 aagagtcaac tgctctacca actgagctaa cgacccaacg ggggggatta ttctcctccc
    53941 aggctcgcct gtcaaacact tcatattaat tttttatacc gcaataatag cattgttagc
    54001 gactggcaat tttgttaacc tgctcgagct atatatctat actccgcgtc attttatatc
    54061 attctcattt tagggcaaaa aacatacaac agcatcttac atcattatct gccctcttta
    54121 tgcttggcta tctcagacat ccgctgtaat aagtactgcg gttgagctat cttattctct
    54181 tcgattttcg caaacgagag ccgccaaaga gctcaaaaca catcacagac agaaacagga
    54241 aagtgtactt aaatggtcga acaatcaaaa gaatccgcag accttacctc tgaacaggga
    54301 gagggactgc aacggaatct gactaatcgt catattcaac tcatcgccat cggcggagcg
    54361 atcggtactg ggctattcat gggctcgggc aaaacaatca gcatggctgg tccttcgatc
    54421 attttcgttt atatgatcat tggatttatg ctgtttttcg tcatgcgtgc gatgggagag
    54481 ttattactct ccaacctcaa ctataaatca ttcagtgatt ttgctgccga cctgcttggg
    54541 ccatgggctg gtttttttac tggctggact tactggttct gctgggtagt aaccgggatt
    54601 gccgatgtcg tagcgattag cgcctactct cagttctggt tccctgactt gtcgcagtgg
    54661 gtctcttccc tgctttgcgt tctgctatta cttacgctaa atctggcaac ggtgaaactg
    54721 tttggcgaaa tggaattctg gttcgcaatg ataaaaattg tcgccatcgt cgcactaatt
    54781 gtggtcggtg tcgcactggt catgatgcag ttttcttctc catctggaaa tgtcgcctct
    54841 tttaccaatc tctggaatga tggcggcatg ttccctaaag ggattagtgg cttctttgct
    54901 gggttccaga tagccgtatt cgcgtttgtc ggcatcgaac tggtgggtac gaccgccgct
    54961 gaaactaaaa atccaaaaat cgtgttgccc cgcgcgatta acgccatccc aattcgcata
    55021 atcatgtttt atgtttttgc attaatcatg attatgtccg taacgccgtg gagtgcaatt
    55081 actgcggatc gtagtccttt cgtggaaatg tttgtacttg tcggcttacc tgctgctgcc
    55141 agtatgatca acttcgtcgt gctgacatct gcagcatctt ccgccaatag tggtgtattc
    55201 tcaaccagtc gcatgctctt tggccttgct aaacaaggcg atgcgccaaa aagtttcggt
    55261 atgctatcta aacgctcagt cccctctacc gggctgatgt tttcctgtat ttgtttgctc
    55321 tcaggcgtgg tgttgattta tctgattccg aatgtgatga ccgtctttac gctagtgacc
    55381 accgtttctg caattttatt catgtttatc tggagtatca tcctgtgctc ttacttaaca
    55441 tatcgtaaaa aacgcccaca gttgcatgca gagtcatcat ataaaatgcc attaggtatc
    55501 ttcatgtgct gggtatgctt ggcctttttc gctttcgtta tcgtactgct aacattgcag
    55561 ccggacacac gccaagcact cattgtcaca ccgttatggt ttattattct ggctattgct
    55621 tatcagttta ttcgccgaaa aaagcaggca gtggacgtga agtaacgtgt atatacacta
    55681 aataattcta gtttcaggac aaaaagttag cgttttgaac aacacaacgt gttggccctt
    55741 tgggctgagg cccacgacag gctgagtatt tgaacgcaac caatgcacat gtaacttgaa
    55801 gcatggcggg tattaatgca agaaaggcgc agacaatgtc agcgccttca atttttttca
    55861 gaaaaatcgc gcatagcaca agtactctct attattggat ataaataatt ctcaactgat
    55921 gtacaggaat taatatgcga ccaattaatg tcgccaccat tgatatataa aaaagttatt
    55981 cccgcaatga aacggttgtg attcgattga tatttttcgc caataattcg aaagctaagc
    56041 aattacactc atcctttcgc tgcgacgcat cagcaacaac accttctatt cttttattta
    56101 actcattgat tttattatca tctaacgttg aaacaatagc agaaatcagc atctctaacg
    56161 attcaatctt agcattaagc gctttttctc caacttcctt ttctgccaac tttattaaaa
    56221 gatgagagag gatattattc atttgaactc cttaatcaaa aaaataacca ccatgcatcc
    56281 acaaggcaac acccgctatt tgtcgcacag gattagagaa aacataacgg agattaatgt
    56341 aacactgtga atggcctgac cgctagtgtc tattatcatt ttaagaaaat catattcgca
    56401 ctacagcaat aaaatgaatc gctacagata aataaatcaa ataagtaaaa aaattaaaaa
    56461 accattttat ttttgagaga aaattactgt tttaaaaaaa caccagtgtt ataaattgtg
    56521 atgattttca cagaaaaaaa taaaaggcgc tcatttatga taggacgtca aacaaggaag
    56581 tcagattaat agccagccat cgggaaacgg ctggctctat agttaacatt tacgcactca
    56641 ttgattgccg tgcaccactc accgcatcct ttgcctgttc acactgtgac aatatcgtct
    56701 gtgcatgaga ataaagaatt ttccccgctt cagtaggcgt aacaccacgt cgactccgca
    56761 ccagcagttg tttttcaagt tcactctcca gcgtcgcgac ctgctggctc agcgccggtt
    56821 gtgcaatatg caacaactca gcagcctgtg tcaggctacc gatatcaacg attttcacaa
    56881 aatatttgag ccgtctaaga ttcatgcctg cctcctgagt aattacccta aagaggtagc
    56941 aaaaagcgcg ccatattatg ttcctatgtc taagaaaaag tgatattgcc ttgataagaa
    57001 acaggtaaaa taaggaaaag aaatgattct gccaaccaac ctctttgatt ttgtatgggg
    57061 aacccatcat cgggacaacc tacgtctgca ccatcttaaa gcaaatcttg ctattttaag
    57121 gtgcaagcct acccgctaat cggcacattt cattactttt tagtgttcaa cttgagcaat
    57181 aatttcaata tgttggttat tagttcggca atcaaacgca tccatcgata acagcctttg
    57241 acaacctgaa acgctaccgc tattatccac cgcacttaac cgattcctct gtagttcagt
    57301 cggtagaacg gcggactgtt aatccgtatg tcactggttc gagtccagtc agaggagcca
    57361 tattaaagaa tgtagatgcc tacgggcgtc tacatttttg catttaatca atcacttgcc
    57421 tcccctctct tgtctactaa catccactga aatacaccta tatccagcaa ttttgttggt
    57481 agatttcttg gtagttctgg ttagattttc cttataccaa caaaaaggaa agagaatcta
    57541 tgtcacttac tgacaccaaa gtaaaaaaag ctaaacctct tgagaaagaa tacaagctta
    57601 ctgatggttt tggtatgcac ctgcttgtcc acccgaacgg ctctaaatac tggcggcttt
    57661 cctaccgctt tgcacaaaag caaaaactgt tagcgctggg ggtttaccct acgatttctt
    57721 tgactgacgc aagggagcgt cgtgatgaag cgcgtaagct gattgcttat gggattgatc
    57781 caggagccag aaaaaaatca ggccgtgagc gacaaggaac acacgatgaa tctcgctcct
    57841 ttgctataat ggctcgtgca tgggctgaga ccaaaaccaa gtggtcagaa gactacaaag
    57901 ttaaggtctg gagacgcatt gaaaactacc ttctgccaga tctgggaaat cgtgatgtat
    57961 cagagcttga taccagcgat ttactcatcc ccctcagaaa agttgagaaa ttaggctatc
    58021 tcgacatcgc catgcgcctg aagcagtata caacctctat catgcgatac gtcgtccagc
    58081 agaaaatcat cagttacaac cctgcttatg atttgcaagg cactatcgaa aaaggtgaga
    58141 cagcgcaccg cccttctatc gaaatctatg aaattcccga tctcttacaa aaactcgaca
    58201 actaccgtgg tcggggtctt ttaacagaat tagcgatcaa actcacatta ttggtttttg
    58261 tcaggtcaag tgagttacgt tttgcccgat ggagtgaaat cgacttcaaa aaatctctct
    58321 gggttatccc tgaacaacgc aaggaagtta aaggggtaaa acactcaggt cgtggtgcca
    58381 aaatgaagag aaagcatttt gtcccactgt gcaggcaggc agttgagatc ttgaaagagg
    58441 ttaaacagat cacttatggt gaaaaagcgg gtgacgggtt tattttcacc gggttttacg
    58501 acagtgattc tgcgatgagt tcaggcacta tcaataaagc ccttcagcgt atgggatacg
    58561 acaccaaaac ggatctgtgt gggcatggct ttcgcacgtt agcctgtagt gcattgacgg
    58621 aatcaggatt atggtcggaa gacacggttg agcttcaaat gagccataaa gagaaaaaca
    58681 ccgttagatc tgcttatacc cataaagtca gtcatcttga ccagcgtaaa ctgatgctgc
    58741 aatggtgggc tgattttctg gatgcgaacc gcaatggagt agttagcccg tttgagtttg
    58801 ccaacaggaa gcaataaccc ctgccctttt agccccttca tggtcgttgg ggcttattgg
    58861 agctctatca acctaagcct attaatgata taacgaacag cgtcgtcgca actaactacc
    58921 ttggctgggg cgacttaagc agtggtccag tcctcctagc ttcgagtaaa aacacaagga
    58981 aataatacaa cgatgaactg gagtctttcc gctttttgtt atttctattt tgtgtttgta
    59041 ggagtatgtt atctcctagg tttttggata cctttacatt ttaacgtatt agaattcatg
    59101 tcccccgtag acataatcaa atcagcaaca tatcccttaa tacctgccgc attaggagta
    59161 ttcttttggg tattgatgga ttcatataat tcaaaaggaa caagaaaacc agaagatgac
    59221 gatccgaaaa tcataaaaat acttttctgg ttgatactgt cattaggtat aatgttaaca
    59281 ttaatgaata ttttttcatt gtctatttat ttatataatc tatttattac agagccagag
    59341 aaaaaaatct cctacgcctt accaattgct tcaatggtca gtatatttta ttttttacac
    59401 aacccaccat ttttgataga caaagaaaaa ttaattagaa atttcgtaat catattcact
    59461 tgcacactgc caacaatatc ttatttccaa ggaagcaaaa acataactaa tcttctagaa
    59521 ggtagttctg atttttatta tttaaaaacc agttcaaaaa attgtctcgt tgataaaaaa
    59581 tcaaagatta tttacttagg ttattttagt ggtaattact ttttcgtaaa ttcaattaat
    59641 aaagatatat gtatagaaaa ggatggtggt gttttactat cgttcaataa aaacaaagag
    59701 ggagatcacg atgagaacat caaagaggct gaagccagct ctaacaaaga gattcattaa
    59761 gccataaaaa taatcgaata atttaaatgt tacagtctgg ctttatttta atacaagttt
    59821 tttctgcaat cagcttcgtt caaaaagcta aaaacactac tggcatgata tataaatgac
    59881 tcattaaaaa atttaaataa atggttacca atgatgaata tatataattt tgattctgat
    59941 ctccatacct ttggaaaaga ttttgatact gtatatgaag acaaagcgtt aatttcccgt
    60001 ggacaatttc tgcatgccta tccacttaac cgacttaaag acatcaccct tgatgagtat
    60061 gtgatcggca aaggaactgc atcgttttgc gcatgtgtcg aagcaaaaac aaaagcctgg
    60121 gcaaatatgc aaggagcaac agcatataag tttggcgttt attttggaaa aacaaaagat
    60181 gatctaaaaa ctcaatatcg ttttactaag aagttcggga aaacaacaaa tgaagctttt
    60241 catcgggtta aagaagctct attaaacctt attcaagcag gtcaatcaaa gaatttccgt
    60301 gagatagatg aaaaccctct ttcccaaatg tttaaggcta agatattaag tctctacttc
    60361 cctgacattt atttaaatat atgtagctct gaacatctca ctgaaattgc tttgaaaatg
    60421 ggaattcagg agcaaaaatt tgtgagcaga tatcagaact tattagttga aaataaatta
    60481 gctaataaaa tcacaaagga ctggagtaac cctaagttca tgtcatttct ttatgccaag
    60541 ttcatacgtg aagatttgaa aaaaaacatt tcaattacta ttaagaaaac tcgaaaaaaa
    60601 gccaggcgga aggttaactt cgaagatatt tctgcaagca gagatgccat aggaaagatg
    60661 agtgaagagt ttgctatcga atgggaaaga aatcgtttaa ttggtcttgg atatcaaaat
    60721 ttagtcgaga aaatagaaga tcgtcgtgac acaccttcct atggatatga ctacctttcc
    60781 tttaatacgc ctggacatga aagatatata gaggttaaat cagttggcag aaacagaaaa
    60841 gaagaatgct tccagtttta tctttctgaa aacgaacgct cagtttctat ctctgatgag
    60901 agtagcaagg attattactt ttacttagta ttctatagca aggatggaaa cccttacgat
    60961 gtcctagcca aacgtgccaa agatttttat tcaaacagtg aaatgtttcc ctgttcttat
    61021 gtagtaaggt ttgatcttga agaaaatgac taaaatgccc acatttttat aaccaaacca
    61081 actataacag gtcgaaaata cgcccaataa atctcaaaat ataggtttat tgggtatata
    61141 aaaatcacta tccaagcgaa agaagtttct ttcctgtatc ttcaaagaac tcaaaagaat
    61201 cccattgcca tatgtaaagt aaggctattt ttcctgaatg ctcttggata aaactcttta
    61261 aaaataattt atttttatta cttgcaataa aagatgaaga gaaactcact atcgctcttg
    61321 acttcaatcc accgccactt ctcataaaaa gaataaaatc attacatcta aacttattaa
    61381 aatcagcaca attattaaca tcacgatcaa actttgcgac aattgacttt attttatcat
    61441 acagaaaaac catgtcataa aatgttttat tactcgccaa ttgagagttc ctttcattta
    61501 actcatcgat atatttatca tcatcctcta ctttaattgg atatcttgcc tgcaatacga
    61561 tatcatgggc ggaaagtttc aaaagtatca tttcatcctt atttagcatt aaacctaaat
    61621 cagcagccat tttttccagg ttatgcccat actccctaaa tattttatct agcgtttctt
    61681 ttctggcacc atagttcatt aataaaattg ctgactttaa taacatttca aaggaataac
    61741 ctaataataa cctactcgtt tttgcagttg aagataccat atcaatataa tcacaagctt
    61801 tattatatgg tatgtttcct cctttatctc taagaagctc tttgttatct tcaccacact
    61861 ctcttagtaa ttttgcagat agatataatt tcttagactc gtcaagccaa tcctttcgat
    61921 taaatatacc tttgccattc ttagaagtga taatgtcttc ctgcattgtc ttctccatcg
    61981 aaaaaataat gctaagttaa taacaagaga agacggcata ggaccattat atgcatcttc
    62041 taccagctca ccccttcggc tcaatcccct gctttctcaa ctcctgacgg gccagttctt
    62101 tgaaccaatt gccgaggctg acaccttctt ttgctgcgac ttcatcaagc tgttctcgga
    62161 gctcaggcga gatgcgtatc tggaaagtcg gtgatttacc tgttgatgaa gatttcttcg
    62221 tatcacgttt tatcgttgac atgtacgtac ctttttaact atgctggatt ttataggtac
    62281 gtacactacc acaaaagcac attacactca tcaccagttt cgcccctgaa aggtatgcaa
    62341 ctaccaggca ggggctaacc acaccgttat ggagttaacg atatggctat cagcaagtct
    62401 agcaattccc ttattgataa gcaccttaaa caagttaagc gttgttttaa tctgttctgg
    62461 caagctacgg aggtgcgtca tgttcgataa cacaccttta gagccggaag aaatcatcga
    62521 tcagtgcaga gcattgatct atgccgttat cgagaccaaa cagcctcaag tcaaagaaat
    62581 tctgacgttc atcctctggg aaaggctcga ctggttatat caggattttc atgcagaaga
    62641 agtcgttcaa aaccagtaat gtgaaataat caccattcct tccgtaatcg gatctggcat
    62701 acaggcatac tctgccagtc agatcccccc ttaatagatc actttaagtg aattcaatcc
    62761 gagttttaaa tgtagagctt cagcccagca ccttgcactg ttacctgaaa cagtatggta
    62821 ttgtctggcg aaaatctgcg ctaacgctaa aaatcaaaga cctacatcat gatgaagtcg
    62881 atatcaatct gaatcccata atcagtgcgg gatcggtgac taggggcaac aaggacactt
    62941 tgccacacaa gcacagaacc agaattatta tctgtcctga gcacacagcg tgagtgaaga
    63001 ccataacgtt agttggcata gaactacatc atccacaaaa gacgagaagt ttatcgcggg
    63061 gtaaacacaa gctatctgaa gtgtaacggt agacaaagaa agctgtgtat tggcattact
    63121 gtcttatgat atttatcata tatggcatat ctaccgtata taaaattata ttatgaaaaa
    63181 actatttggg tcaaacatat atacgtatgc tataaaatag gcattttaaa ttcattaaaa
    63241 aacaatacgt tgtaaaaata aacaatttaa atcatctaaa aaacaaaaag ataacaacaa
    63301 atttacaatc agatggattt gatgtaggat tctgttacat atctggttgg agcaataaga
    63361 tgaaatctga aaacacagca aaaaaaccta ttgaaaacaa agccgttact ataaaaaata
    63421 atgcagttct agcacgtcta atggaggagg ttagacacga aaaagatata atggcaaaca
    63481 gccgttatga tcgtgttcac aaccgccaca accgttagtc aaatgttaga cacagttctg
    63541 ttaaaaacag caagtaggtg caacctggat tgcacctact gctatgtgta tcggggggca
    63601 gatacgagct ggaaggaaca gccgtatcat atgtcagata caacgatcaa aaaaataata
    63661 gaaagactgt ctgaatacag cacttatcaa agtgctggtt ttgccatagt tctacatggt
    63721 ggggaaccac ttttacttgg atacaaacgt ctcgtatccc tacttacagg gctaagaaat
    63781 tatttaattc ctgaaaaata ccccataagt atacaaacta atggagcttt aattagtgat
    63841 aaaattcttg aactatgtga aaagaatcaa gtaagcatct ctgtaagtat agatggttca
    63901 agaaaagcga atgatattgc tcggtttact aggagcggga aaagtagctt caatgaagtt
    63961 gttgctggta taaaaaaact aagttcgcat cctaatagta agttcttgtt tgcaggaact
    64021 ttatccgtcg tacaccccaa tatacatcca caggatactt ataactattt aaaaaaatta
    64081 aatacaccaa gtatggattt tctttttcag gatggaaacc acgataaact tcctgtcggg
    64141 aaaagaggct ttgtctcaac tgaatatgga aactggttac actctatttt tttactttat
    64201 attaatgatc cctcccctgt accaataaaa atcctggatg acattattaa aattttactt
    64261 ggtggcacgc caagtaaaga gggaaaagga gaaaatgatt ttggaattct tgtgattgaa
    64321 tctgatggag aaattagaaa aaatgacact ttgagagctt ctttcgaagg agtagattat
    64381 tttatcaatc gcccgaatat ttatagttcg tctatttcag acgtgatcaa cactgatgag
    64441 tttaaaaaat acacaaaaac atccatgccg atatccgaga cttgcaaatc ctgtgaacac
    64501 attcatgttt gtggcggggg gatgccgctg tatagatgga gtaaggaaaa tggatttaat
    64561 aatccctccg tatattgtga agatcataaa gttgttataa atgaaataaa aaaatattta
    64621 attgataaca gtctaataag tgagcaatga aatgattaca acagcatggg aaaaagaaat
    64681 aaatacctct ccatataaat atttctcttg ctcttcaggg ttaccatcag agatatcaga
    64741 tgatatttta ggttggcttg aaaccaatgc cccctggaaa agagttaatc agtcatttta
    64801 tgaccaatat gaatttagtt tttatgatgc cgaactacca gaaaaaatca gttttattaa
    64861 aagcgatatt tttattaatg aactaaaatc ctttctcgaa aaaaacttca ctgtatgttt
    64921 gtcaaacaaa gttgatattg ttgctcacaa acttatatca ggtgataaaa ttaaaatcca
    64981 caatgattat atagaaggac aggagagtca caggattctt tttcatttta ataaggagtg
    65041 gaacgaaaat aatggtggat attttatggt tttttctaag gacaaccccg agtcgttaca
    65101 tgccataatt cctcccttac atggaaatgt ccaaggattc gaaatctcca taaactcaca
    65161 tcatgctgtt agcaaagtat atgatatgga aagatatagt atcttatatt ctttttacag
    65221 gaaaaaacat ggacattaat aaattcatat gcaaaccatt atcatgggga tataacgatc
    65281 ctattttttt atccttatgt gaggaccatg ctggatatac tataaaaaat acgacccaac
    65341 cccaaaataa ttcagacaaa gaattttttt taaaaaaacc gggcatagat tatatacatc
    65401 caaaatttct gtctgaatca gaaaaaatag catgggaatc gatgggtata tcttttgtag
    65461 aggaagagaa tttccagtat agctcattca atgatttagc attgcagatg tatgaaagcc
    65521 ttgcatgcgt cagaaactta caaagctcca tttcgtcatt tgccttggta tttcatccaa
    65581 ttttatcggc accaaataat gacgttagtt tcagtgaccc agatattcct tttgatattt
    65641 tttgctctat accatcgatt caagaagcga atcgtttaga aagattcaca gaaagtgtta
    65701 ttcacgaaac tttacatctt caactaactt gtattgaaaa acacattcca ttgtttcacg
    65761 aagagtattt atctaaccac ttttattctc cgtggaaagg tgaaggtaga aatgaaagag
    65821 gcctacttca tgccatttat gttttctcaa acatcagaaa atactggatt acaatgaaca
    65881 actcatctgt gaaaaatagt aatttcatag aaagaagaat aatttctata acgaacgaat
    65941 tagaaaaatc tgagcatata tttacaagca aggccttaac aaaggaaggc agtagactcg
    66001 caacactctg tttttctgac ttatagtcaa gataacatat ttaatttaac cgacaatatg
    66061 tttattcttt ataggagcgc tatcttattg agcagtagta gtcggtatgc tcggcataaa
    66121 atttattttt ataaaaacaa ttaacaacaa tcgataaagc agaatataaa ttagatgaca
    66181 gctatgttta tagctgtcat ctaaaaatca atagttattc cagttattct ctaaccaagc
    66241 aattacattt ttatggctac ggacatcacc tggtagattt tctctgatca tcttttctac
    66301 tttaagacca atcgccttat tctttaaaga gtgtttctca gcaaatctat tgataaatgg
    66361 aaggacttca tatccttcat gtcggttaag caatgtgcta tctggctttc ctgtcttttt
    66421 cggatcatca ttacctaatg ctgtccaact atatgtatgc tttaaatctg attgtgataa
    66481 aagagccatt tctcacctca ttacattatt taattgacga aaatagtaaa tatatttcac
    66541 cgagccaaaa cccccaatga attcagcaac tgggtatcta acgtttcagt agctggtaaa
    66601 gggagacctt tattaattcg atatgttttt atagccgatc gggttcccgg ccccataacg
    66661 ccatcaatga tgccctcata atagccttta tcaaacaagg caaattgcac acgcatgata
    66721 agcctgcgtc ttttttcctg atcggaagag acaccattca tggaggtatt ggtattttgg
    66781 ctcgttccag atcttgaaga gcttacagaa tttccggttt caggacgaag cgctctcgtt
    66841 gaaggtgaag atgccgctgg cgaagacggt gatgacgtca ctcctgagcc gctactcccg
    66901 gaagatgaat cactgctgcg agggtagtat ggtgtagcac taccaccata atatccacca
    66961 ccggatgaag aacggtggga gctgtgcgaa ctgtggctac gatgagagct gtggcttcgg
    67021 tgaccggcaa tataaaaagg cacttcggta ttgagcggtg caagcacaag gtcgtgatca
    67081 tttaatggag agtagccaaa ctcttcaata ttcatcgcgg catcactggc ccacaccgag
    67141 ttattgagtg ctaaaaaccc aggtaataaa gaggctaact ttaatctttt cataggattg
    67201 gtctcggcat ttgatgaaaa cggccttttg atgaggagaa ataaccagca caggatgatt
    67261 ttttactgca tggctcacac gcttctgggt agtaattttt ccagtcagaa atggattgtg
    67321 ttgaataatc ccacagagat tcaggtaagt gacacaatgg gtaattaaat atcaccaacg
    67381 ggacgcccgc tctgttagcc gtgtcggtag ctaaggacag agaggtcgca tacgaatcgt
    67441 gactgacaaa aatctcatcc cagttctttc ttgcccagcc aatagattcc aatcccataa
    67501 tggagatctg actgatgtta gaaaaaaccc tgccaatata ttccaccacg tcagcaagat
    67561 cgtggtaatt cgcctttgtt gggatgaccc ttaattcaat gttgatacct gaatttccag
    67621 cgttaattaa acccttaacg gtgtccctga aagcaccatc actccccaca agatgatcat
    67681 gaatgtgttg tcgtgaagaa taaagcggga tcccaaaggt gatgttcatt cttttgcttc
    67741 gttctctcac ctttgcagca aagcgagcat cagcaaactg tcgaccattg gttaatacat
    67801 gcagagaggt atcaggagca ttatcaataa cgaaatcaag aaacgagaga aattcttcgc
    67861 catatagcag cggttcacca ccactgaccc cgacaagccc attaaagtta aatgccgcaa
    67921 tcgcaagggc agactgtgta agaagccagt catcattggg tgtttttggc ggttgagaac
    67981 agaacaggca tcggttatta catctttccg tcacaaggac agtattatga ttcgctctgc
    68041 gagacaaaat cactctgagc atattgccat tattcacaac gccaatatcg ccatcttcta
    68101 cggactcgta tagctggtta ctgacgatag agccagcata ataaggtgca accgcaccat
    68161 catcaaaaga aggttggatc agtaaatttg gcagaaaaaa ctgtggatca acgggcttct
    68221 ttttgcacag ccgatagaaa cccatttcaa ccgtgttttt tgccgtaaaa cggaagatat
    68281 cgtttcttag cacctcagac ataagcccac cttttcagca tcgttgcggt aggcccatcc
    68341 tgagcaatgg cattcatcag gaaccggaac attcccttat gatattgaca gaagatggag
    68401 cgacttctat cgcctaccgg ctctccctga acactgatat tctggcaagg gtcagcaccg
    68461 caaaatggct ggtaagcaca ggtatcacaa cccggtagag cgaaattgaa cgatgaactc
    68521 agaactgact gatagtaagg gctttgagaa aaagacaatc ctgaaacagc cccggcacta
    68581 aaatcagcat ctgcattcac cttctgaagc attctgcttt cgtcgctacc ataaacacgg
    68641 ccatcatagt taaagagaat acagttcaat acgacgccac tgggggattt cagatcggca
    68701 tagccactaa aaccaggatt gaaaatccgc tttaaatgta tcgcggctga gtgttcaacc
    68761 acagcagtgc ctttctggtt atgccacaga atttcgtcaa tcaacgcggc gtaaaagtcg
    68821 aaatattcct gcatcgagaa agtgaaactt tctttatggg caaatccata ggggctaaca
    68881 ggtctgacaa agatatcagt caagcctaat cccagatggg catcaatgat tgaacccgga
    68941 tgttggatca atgccttggt aacggtcgtg actgtcgcca cgcgacctgc gccaagctgc
    69001 tctcgcaccg ccagcatccc cgcaacggct tttgaatagg atttaccttc ggcaaggaga
    69061 cggttcttat tgtggatatc ctcaccacca tccagagaaa cggagaacgt gatattgcga
    69121 tctttaaccc agtccatcat ggacgattca agcagtgaaa gcgttgtggc aatcaccatt
    69181 tcaaagcatt gctgacccag cgttctctca cactcagcgt atatttcctg gatcagatca
    69241 aaccggagta aaggctcccc accctgcact tctattttat agggaggaga agacagtttt
    69301 ttaatggtct gaacgatgtc agggatgaga tgcggatcaa gatcgtaacc ttcagcaccg
    69361 attgccgccc ggctgacctg acaatacttg caggtatgat cgcatctcaa tgttggcaca
    69421 atcatgaaaa tcggtctgac agccagatcg ctcatcagcc gtttagcaaa tcctgaactg
    69481 agtgaagcag aagccaggtc ttcggaagca tcgtcggcaa tgaacagctt actttccagg
    69541 atgtcactag accggaactc cggcgaccat ttattgcagg aaaggctttc taattcatcg
    69601 ttagagatga agtgatgaaa gccagccaga ttgctgatga ataccctgcc atcattcaac
    69661 ctgtcaaagt taaatggcat tggcttcatt cgctcagcct cacatcaatg cttcttagca
    69721 ccgtggagat gattgaagcc ctgatatgtc cggtatggct ttgatgagct tcgcggagct
    69781 tgtaatcatt caggaggcgt tcaaattcaa acttgatggt gccgtcaaag gactcaaaag
    69841 aaacgatcca gtcgttgtca tctgccccca gttgccatct tgtgtaagca gacatccaat
    69901 acaaactatt tctcaccacc cattcagaat ggtttgtttt ttctatagtt tttataaaca
    69961 ttgctgtcct gtctaattaa taacaattaa aaaattgtag acgtgaaata tttttatgct
    70021 aatgattttt taaaatactg cttatacgat atagccctac tatcgaaaaa gatccacctg
    70081 agagctaaaa ataattaatc caataaattt aattaaaaaa ataacagcaa gataacagta
    70141 tcaatttatc ttgatttaac ttgtattcaa ttgatggcat gttacgttac agtaggtaga
    70201 tcagtgaaga gctttgatct acgtagtaat cgaggttaga cagccacagt atctcttgta
    70261 aacggtatta ttaatttaat aaaaaattag attgataatc atttcagaga aagaaattag
    70321 aaattttatt tactcctttc atgaattatg ctatacagtc actatcgact gaaaagaaaa
    70381 taacacctgt ataaaattta aaattaaggt tccgcttttt tggtggaagg ttaaaccttg
    70441 taatttttcc gaaaaccatt tgaaaaatca caggtattag atatattacc ccgttattga
    70501 tatgacacca taaatactat atgcaataac aaattctaac ggccagctaa gcacctacaa
    70561 aatataacat ggataaatta ttatgatact ccccggatat gaaccgagat ctgcaacaat
    70621 ccctgcgaaa atagattatg aactttcact tgaatatcaa ttagagaaag ttatttggtg
    70681 tgctgaaaag tttagcacac gattacgtga ggaccgtcac tcaaatgact tagaaaatga
    70741 aagctatttc ttattcgaca cattgattaa taacattgcc accttgactg aatattattt
    70801 ctccaacgtc atttattcac ttattggtac tattctggat aaaccccaaa aaatagaatt
    70861 tagagggttc gacaattcta attacattca taaaaaaaat gatattttta agagattcaa
    70921 aattggcgaa ttaaccaaag gtagcgacgt tgaaaaaaaa acatatctta atagatgcag
    70981 cgaacatttc gataaatatt tagagtttat tataagtggg cgttatgata ttttatatga
    71041 aatcaacaat tatataaaac acaatgccag attacgtggt ttttggttga agtcaggttc
    71101 atcaaaagat gaatttatta agtaccattt tcttagattt acagcagata acgaattttt
    71161 atttaaagac aaaataataa aaggtttatt gtcgatagat tatgatgaag cgattcagga
    71221 taacttcgaa ttagttttaa agaacaggaa gtataatccc gtgaaaaaat atggtagctt
    71281 tgtttttttt gcaaatgatg atgtggtcta cgtcagggga ccaaaagggg ctgggttaac
    71341 gtctaattca atagtaaaaa agtcctatca actatgtcta gaaatcatca acacacttat
    71401 agcctcaaaa acaggacaaa ttacagtact agaaaaattg aattctttta aagaagtaat
    71461 agaaagagaa aataataaac tgccattaat ataaacatac tctaatacaa ttcgagtttc
    71521 aggaaggcgg caagggaagg agtcccgatg aacttactca ggtaagtgat tcatgtgact
    71581 gaaagtagcc aacgaaaatg cagcttgaag tatgataggt ataaatttca tagcggagaa
    71641 atggaaaact gaatgaacat tatccatgtc aatgaaaaaa ttaaattttt aatttctcag
    71701 tattatcaat cgcagtttga ttgtttacca catctcatca ttcaacataa aaaaaattaa
    71761 ttattgatta aaaactgaga ataaaatcat gagcagaaaa cctaatttaa aaaaagcatt
    71821 agtgtctgac attttattgt taatattcac agtaattgta tgtgtattaa tttttggttt
    71881 catacttaaa ttacttatac aatcagacct ttcaaatgga actcgtgaat gtaatataaa
    71941 aaataactgg gtgagtatga gttgtataat tttagcttca ctagcaatgt catactggta
    72001 ttacttaaag ggtaaatcaa taaaggcatt aaatgattta ttactctttt tctctgccgc
    72061 agttgcaagt tatttttata taatggatca tgaaacttat cttgagtatc atgacaacag
    72121 tatgttgtgt aaaaacatga cttacatggg atggcaaata tttattttaa cctgttcttt
    72181 ctccaaagcg tttattgcat ccattgaatt cattcaagaa cggagttttt taataaacac
    72241 tagtgttata aaatgcaatc acagtgataa agagttattt ttttataaac ttgcgtcttc
    72301 tcttattgaa atacttagaa agaaaggata ataatgcata ccaaactaaa agagaaaaca
    72361 ttactcccgt tattacatca cct
//
