# Supplementary material for: May the Phage be With You? Prophage-Like Elements in the Genomes of Soft Rot Pectobacteriaceae: Pectobacterium spp. and Dickeya spp
Source: Front Microbiol. 2019 Feb 14;10:138. doi: 10.3389/fmicb.2019.00138 (PMC6385640; doi:10.3389/fmicb.2019.00138)
Supplement: Supplementary file 2 [file Data_Sheet_2.ZIP › Supplementary_prophagesGENBANK_files/Genbank FILES _SRP_prophages/phiPwa1.gb]

LOCUS       Exported               61207 bp ds-DNA     linear   UNK 02-AUG-2018
DEFINITION  phiPwa1.
ACCESSION   .
VERSION     .
KEYWORDS    .
SOURCE      phiPwa1
  ORGANISM  phiPwa1
REFERENCE   1  (bases 1 to 61207)
  AUTHORS   .
  TITLE     Direct Submission
  JOURNAL   Exported Aug 2, 2018 from SnapGene Viewer 4.2.3
            http://www.snapgene.com
FEATURES             Location/Qualifiers
     source          1..61207
                     /organism="prophage phiPwa1"
                     /mol_type="genomic DNA"
                     /note="/genome_id=6666666.356864"
                     /note="/genome_md5="
                     /note="/project=robertczajkowski_6666666"
                     /db_xref="taxon:6666666"
     CDS             complement(271..774)
                     /codon_start=1
                     /product="Non-specific DNA-binding protein Dps / 
                     Iron-binding ferritin-like antioxidant protein / 
                     Ferroxidase (EC 1.16.3.1)"
                     /EC_number="1.16.3.1"
                     /label=Non-specific DNA-binding protein Dps / Iron-bin
                     /db_xref="SEED:fig|6666666.356864.peg.1"
                     /db_xref="GO:0004322"
                     /db_xref="GO:0004322"
                     /translation="MSTAKLVKSAPSELLYTRNDLDDSVKTSTIALLNQLVVDFIDLSL
                     ITKQAHWNMRGANFIAVHEMLDGFRTSIIDHQDTIAERVVQIGGIALGTVQIVGKQTSL
                     KSYPTTIHSVQDHLKALAERYAIVANNVRKAIGKTEDEASADILTAASRDLDQFLWFIE
                     SNIE"
     CDS             1112..1651
                     /codon_start=1
                     /product="DNA topology modulation protein"
                     /label=DNA topology modulation protein
                     /db_xref="SEED:fig|6666666.356864.peg.2"
                     /translation="MRINIIGTSGSGKSTLARHLSEKLDVPYVEMDALFWLSDWQGRTD
                     ADFFQRLESALESDGWVLDGNYNRTRDIKWRNVDVVIWVDYCFTRTLFQAVRRAYLRAW
                     RKEELWSGTGNKESFLRSFFSRDSIIFWTIKTYSRNRKRYLADLADPRYRHIRFITLHS
                     PQECETFLQHFPEEMK"
     CDS             complement(1671..2552)
                     /codon_start=1
                     /product="Integral membrane protein"
                     /label=Integral membrane protein
                     /db_xref="SEED:fig|6666666.356864.peg.3"
                     /translation="MTLFPHRLSSFIPVLLIIISMLSIQSGAALAKNLFPLIGATGVTA
                     LRLGIGTIILCIIFKPWRMRFSSNRLPLLIYGITLGGMNFLFYLSLQTVPLGIAVALEF
                     TGPLAVAMLASRRLIDFLWVFLAVAGLWFLLPLGHNIGNVDLTGAAYAISAGACWAFYI
                     LFGQKAGANHGPGTVAIGSCIAALIFCPIGAYYAESTLFSLTILPLGIAVAILSTALPY
                     SLEMVALTRLPARTFSTLMSMEPAIAALSGILFLGEHLAFIQWMALIFIITASLGATLT
                     IKSAEVRKEEKT"
     CDS             complement(2686..2811)
                     /codon_start=1
                     /product="hypothetical protein"
                     /label=hypothetical protein
                     /db_xref="SEED:fig|6666666.356864.peg.4"
                     /translation="MSKSIYHTNYIEVFIVTVRLKINSPPGGKTDNSEFLAQFVC"
     CDS             2929..3444
                     /codon_start=1
                     /product="Attachment invasion locus protein precursor"
                     /label=Attachment invasion locus protein precursor
                     /db_xref="SEED:fig|6666666.356864.peg.5"
                     /translation="MKKIACLSALACVLAVGAGSAFAGQSTVTAGYAQGDAQGVQNKVK
                     GFNLKYRYEQDNNPLGVISSFTYLEKNGSDDGFYNKGQYMGFTAGPAYRLNDWASLYGV
                     VGFSHGKVTSNDTNGLDNASNDDYGFTYGAGVQFNPIQDVALDVGYEQSRIRSVDVGAW
                     AVGVGYRF"
     CDS             complement(3557..3781)
                     /codon_start=1
                     /product="hypothetical protein"
                     /label=hypothetical protein
                     /db_xref="SEED:fig|6666666.356864.peg.6"
                     /translation="MKKRKTRVRAVDATTMYNLNRLNKSLLPDEHYLHRKNLHVKIISY
                     NRLLQYACDQWQQERPDIDRLEGDWINYG"
     CDS             3735..4904
                     /codon_start=1
                     /product="MFS transporter"
                     /label=MFS transporter
                     /db_xref="SEED:fig|6666666.356864.peg.7"
                     /translation="MVVASTARTRVFLFFTIILLGLNLRPVLAGIGPLLNHIQAATGLD
                     DSMAGMLTTLPVFAMGWCALYGGQLQARLGEYRGITLGIVVIALACSARWWLNSGIALL
                     VSAALAGIGIALIQALVPSFIKLHFGRHSSLLMGFYTTAIMTGAAFAASSVSPLANAWG
                     WQRALACWGIVALVAAVAWRCVPKAYTAKQGAVTVLATRRSGMDWLLMVFFGIGTGAYT
                     LVLAWLPPYYMQLGLDATQSGLMLGALTMTEVISGLLVSTFINRFPDRRKLLLPILAVM
                     LVGMIGLIAAPLTFTYPIIIMLGIGIGALFPLSLIVALDQVTEPHKTGSLMGFVQGGGY
                     ILASLMPLLAGFIRQHTAGLEQAWMIMTVGVVVLIIMATRFAPLTSPGR"
     CDS             complement(4952..6352)
                     /codon_start=1
                     /product="MATE efflux family protein"
                     /label=MATE efflux family protein
                     /db_xref="SEED:fig|6666666.356864.peg.8"
                     /translation="MKKLKDTDWYKKRYSNRVLFWREISPLAFPIFIEGLCVVLMGVFS
                     TFLVSWLGKEAMAAVGLADSFNMVIIAFFTAVALGTAVVVAFSLGQRNRKQARSAARQS
                     MSLLVLSSFLLVALVEFAGSAIIDLIAGQADEQVKTLALTFLRWTVWGYPAVAVALVGC
                     GALRGAGNTKLPMVINIGMNILNIAISSLLIYGAFSWEGLGFIGAGIGITISRYIGAIL
                     VILTLMHGFNGALRIPFRSYFAPFTVSILYEVLSIGIPASIESVMFNIGKLITQRFVAG
                     MGTEVIAGNFIAFSISTLINLPGNSLGAAATIIVGTRLGKGQIMQSTRQLKHIFWLSNI
                     GLCALAVLSVPSASFLASFYTNEPEVIDVAKHLLWLNALFMPIWAASWVLPAGLKGAKD
                     ASYTMWVAMAGMWGCRVIAGYILGVMLGFGVIGVWMGMFFDWIVRGFFYYRRLMSGRWL
                     WRYRSPTD"
     CDS             6620..6778
                     /codon_start=1
                     /product="hypothetical protein"
                     /label=hypothetical protein
                     /db_xref="SEED:fig|6666666.356864.peg.9"
                     /translation="MAARIQSAISSFLLAEHHVEWRIMMGFNGSKEDHDHANTTCDFTR
                     TGQQIVR"
     CDS             6768..7262
                     /codon_start=1
                     /product="Rhodanese-related sulfurtransferases"
                     /label=Rhodanese-related sulfurtransferases
                     /db_xref="SEED:fig|6666666.356864.peg.10"
                     /translation="MLDEGAILIDIRQPEEYAREHIAQARLRPLNPTAGYALPKEDREG
                     KIIIFHCLSGMRSAQNAEILMQSAFPATAFLLNGGMTAWKKVGFPTEINNKQPIDIMRQ
                     VQIAAGVLILSGVLLGYSVNSAFFLLSGFVGAGLLFAGVTGFCGMARLLMKMPWNRGAK
                     R"
     CDS             7320..7649
                     /codon_start=1
                     /product="hypothetical protein"
                     /label=hypothetical protein
                     /db_xref="SEED:fig|6666666.356864.peg.11"
                     /translation="MDMKNIPFGTTDWSQIEPTEYKGESGIAYWRTQRFDHIRVRIVEY
                     TPGYLADHWCSKGHVLLCLEGELHTELDDGRVFVLKPGMSYQVADNAEAHRSYTETGAK
                     LFVVD"
     CDS             complement(7890..8366)
                     /codon_start=1
                     /product="Putative cold-shock protein"
                     /label=Putative cold-shock protein
                     /db_xref="SEED:fig|6666666.356864.peg.12"
                     /translation="MNGTITTWFKDKGFGFIKDENGDNRYFHVIKVANPDLIKKDAAVT
                     FEPTTNNKGLSAYAVKVVPESKYIYIAGERLKLTSLKSFVVYSEEVPADTHIDKENVVL
                     SVGALMSSIRPKSSTKPGEMRSLKKLAITTFQGTTLIFSEDEIDIDAAVKQLKM"
     CDS             complement(8668..9207)
                     /codon_start=1
                     /product="Nucleoprotein/polynucleotide-associated enzyme"
                     /label=Nucleoprotein/polynucleotide-associated enzyme
                     /db_xref="SEED:fig|6666666.356864.peg.13"
                     /translation="MTKLTLQEQMLKAGLVTSKKMAKVQRTAKKSRVQAREAREAVEEN
                     KKAQLERDKQLSEQQKQATLSKEYKAQVKQLIEMNRIDVSKGNVGFNFTDNNLIKKIDV
                     DKLTQAQLISGRLAIARLVLDNSGESEYAIIPAIVADKIMQRDADSIVLNSALSQEEQD
                     EEDPYADFKVPDDLMW"
     CDS             9273..9434
                     /codon_start=1
                     /product="hypothetical protein"
                     /label=hypothetical protein
                     /db_xref="SEED:fig|6666666.356864.peg.14"
                     /translation="MQDLIAASLEFGGDCYLQLALAGLRIGYNVQFWALFVREQCQDFL
                     GVMSDMRS"
     CDS             complement(9462..9707)
                     /codon_start=1
                     /product="hypothetical protein"
                     /label=hypothetical protein
                     /db_xref="SEED:fig|6666666.356864.peg.15"
                     /translation="MNNEIPLKYYDIADEYSTESAKSVSEPEREALARYFQLLITRLMN
                     NEEISEDAQKEMASEAGIDEQRIDEIAMFLNQWGNE"
     CDS             complement(9906..10292)
                     /codon_start=1
                     /product="Putative periplasmic protein"
                     /label=Putative periplasmic protein
                     /db_xref="SEED:fig|6666666.356864.peg.16"
                     /translation="MKKLAIVWFFLLPTAQAAALDCNNANTQLDMSQCADQTYKKVDDE
                     LNKLYQDIVKRTVIEEHKALLKSAQRRWISYRDADCEFQTFPTTGGSVHGMLYSQCLTQ
                     KTAARVKEFKSMLRCKEGDLSCPL"
     CDS             10701..10910
                     /codon_start=1
                     /product="Mobile element protein"
                     /label=Mobile element protein
                     /db_xref="SEED:fig|6666666.356864.peg.17"
                     /translation="MSGKGCCYDNAVMESFYHTLKTELMCGKTFVSREQAMNAIFDYIE
                     VFYNRRRKHSTLGYQTPVDYEMAA"
     CDS             11233..11943
                     /codon_start=1
                     /product="hypothetical protein"
                     /label=hypothetical protein
                     /db_xref="SEED:fig|6666666.356864.peg.18"
                     /translation="MKAKVFLSLLFLAMSSNVAAFTQFKPAVLNAALLFEHDATTGNVK
                     HSLQWIRDVSGKLQAMTEVKFDRSGCFTNINMVDKANDREFHLVNKDGVLTSFKGQRIT
                     GKINERCEITELENEKGKFVLSYNVRGLLETIVDKDTGEVVERYEYHSNQFPVRIRNYK
                     DQKDKRIFYPSGSAQFIDSETVSKSGELTVRVKQSCAYTADGNADKCSLIASTNDDYHG
                     SILIWISNHEIEYF"
     CDS             12075..12212
                     /codon_start=1
                     /product="hypothetical protein"
                     /label=hypothetical protein
                     /db_xref="SEED:fig|6666666.356864.peg.19"
                     /translation="MKEFILIRRVLTENSTDYMHYIFHAFFLVQFIAPYINTASAIGDA
                     "
     CDS             complement(12192..12638)
                     /codon_start=1
                     /product="Phage integrase"
                     /label=Phage integrase
                     /db_xref="SEED:fig|6666666.356864.peg.20"
                     /translation="MARQTKPLNNTEVKSAKATDRAVTLYDGDGLELQVTPSGSKLWRF
                     RYYKPFTRKRAMISLGSYPSVSLAEARKLREDARLLLSKDVDPQEHKQAEQSRQKNATE
                     NYNRSTYLEQRKILMCWWGEFVETAATGKVMASEGARGLRIANG"
     CDS             complement(13030..14211)
                     /codon_start=1
                     /product="Integrase"
                     /label=Integrase
                     /db_xref="SEED:fig|6666666.356864.peg.21"
                     /translation="MAARPRKREYRSLPDYLFFDKSKGVYRFTLITGKKKSIGKDRAIA
                     IAIAREYNYQMRPESAVSINSLIRESGGRSGENLPFSNHVDNIMSRAITDEKPSPNTLA
                     DWNNDALRVKEFFCDIVSCDIELEHVNAYIQHYHSEASANVQNRKISFLKKLFSYAVDE
                     SLMFDNPASRKKMRRVDGKKRRRLSFQDFQRIRASAPSWLRTAMDLALQTTQARLEVSR
                     IKYSIKEPKEGVCGCLWHQVPENGIHGVLYIHRQKVHKKEASHIAIPIGGELKRIIDDS
                     RDRIASPYVVHRLPEKNSNPISQEVNHPTQVSPDYLSRAFSDLRDTVGVASEYPLAERP
                     TFHEIRALAAFMFEKQGIDPQARMAHSDAKSTKIYTQNHLDWVTVPHAEIKTG"
     CDS             complement(14216..14422)
                     /codon_start=1
                     /product="hypothetical protein"
                     /label=hypothetical protein
                     /db_xref="SEED:fig|6666666.356864.peg.22"
                     /translation="MSKLMKASKWGQREFEVGSEPDTRTIKRWIENGLLRGRIVDGSAW
                     VCSSEKWGVDSTVSQAVMQLISE"
     CDS             complement(14463..14798)
                     /codon_start=1
                     /product="Phage protein"
                     /label=Phage protein
                     /db_xref="SEED:fig|6666666.356864.peg.23"
                     /translation="MKSTITALPVERDEYGFWTHPKYEEFCADRESIPTVEFDEWMQNN
                     GMDWGITELESDPATEADAIRDRYFEAGDLNVSDWNPTPPAGDGWFVGSIHDTEDGPVC
                     IWLRENA"
     CDS             complement(14800..15279)
                     /codon_start=1
                     /product="Methyltransferase (EC 2.1.1.-)"
                     /label=Methyltransferase
                     /db_xref="SEED:fig|6666666.356864.peg.24"
                     /translation="MTNATILDMCCGSRMFWHDKSDPRAVFIDIRDEKHTLCDGRSLVI
                     SPDIIADFRQLPFADESFPVVVFDPPHLERAGPEGWMRKKYGVLNPQTWRDDLRAGFLE
                     AFRVLRPLGVLIFKWNETQIPTSQILSLINERPIITQRTGKNDKTHWVIFVKNGE"
     CDS             complement(15276..16091)
                     /codon_start=1
                     /product="Partition protein, phage-associated"
                     /label=Partition protein, phage-associated
                     /db_xref="SEED:fig|6666666.356864.peg.25"
                     /translation="MAKNSKDAYGAQGKTNVLNFAPENLYMTDDPSHPLYDERIYLALS
                     EAMVLNIMDQGVIEPIVIWKDRETGTVYVVDGRQRVKHAREANRRLVDQGKPCLMVPAV
                     VRIGSVHRAKEAAISANEIHIPDTPLGRAKKMASMLTLSYDESDLALYFGCSAQTVTAT
                     LALLDCTQAVQDAVESGQINTGHARQLANLPPDDQREKVKELVQATSGVSGHERVRRQR
                     EVLGNAKPKLKSRKEITKALENATGDYADALRWVLGDNGHQQDCQDGEV"
     CDS             complement(16084..16857)
                     /codon_start=1
                     /product="COG1896: Predicted hydrolases of HD superfamily"
                     /label=COG1896: Predicted hydrolases of HD superfamily
                     /db_xref="SEED:fig|6666666.356864.peg.26"
                     /translation="MSWISTYTGRHFNYADPNLDSICLLDIAHSLSQINRLCGHTNWPY
                     SVAQHSVGASYIVPQKFALEALMHDAHEAYVNDMMSPLKHLLPDYKSIETRIEQLVRMK
                     FDLPLKTSPEVKHADLVMLATEKEALLHANSGEWPILEGITPSNRIIVPMSPVEAKQQF
                     IHRFHDLTAGQYLAVDYEGEPVYLGPPEDDALIIENAMHSLMLRNIQQGLKLPGRKPLS
                     AEVLDHVNHLHADNEHLRSVICELEAQLKAGVQRG"
     CDS             complement(16857..17732)
                     /codon_start=1
                     /product="Leucine-rich repeat protein"
                     /label=Leucine-rich repeat protein
                     /db_xref="SEED:fig|6666666.356864.peg.27"
                     /translation="MSNFVDVLKKKKINHVVNDNAAIVIEGDLSLLGRTDITSLPENLS
                     VGGYLDLEGTGITSLPENLSVGGSLYLRGTGITSLPENLSVGGSLYLRGTGITSLPENL
                     SVGGSLYLRGTGITSLPENLSVGGYLDLEGTGITSLPENLSVGGYLDLEGTGITSLPEN
                     LSVGGYLDLEGTGITSLPENLSVGGYLDLEGTGITSLPENFTCDSLYLDPQRFDNVTYR
                     ENCGNSSRTIFAAWVQGNFRIAAGCFWDTLDEFESAVDESYSGDAAEAYKQAARDCVAD
                     LTEKLNKAGE"
     CDS             18249..18482
                     /codon_start=1
                     /product="hypothetical protein"
                     /label=hypothetical protein
                     /db_xref="SEED:fig|6666666.356864.peg.28"
                     /translation="MLKSHLIAKCLFQCGMISDIQSGESAVESIFNEYFPDGSFSKWNT
                     QLSDNVAEHFLHISRGSSTIRVDSFIKDLWDL"
     CDS             complement(18460..18693)
                     /codon_start=1
                     /product="hypothetical protein"
                     /label=hypothetical protein
                     /db_xref="SEED:fig|6666666.356864.peg.29"
                     /translation="MSMSGRLIQINVNGVLLASLQTDSAVAADYISFMQALTEAIMDKV
                     ALEKEAGRSGKTITHGLFETLGSLPIKDPKGL"
     CDS             complement(18885..19349)
                     /codon_start=1
                     /product="phage-related protein"
                     /label=phage-related protein
                     /db_xref="SEED:fig|6666666.356864.peg.30"
                     /translation="MKDIDEIRRENMRLLEVELGGPAEAASRVGMSPAQFTNLKKGAKD
                     SKTGKRRGMRKGTARRLEEAAGKPVGWLDIDHSSPTPNEQSLGVDINELFAHALPEQQA
                     VVRYILRHSNDKIPEWVDSDARAYADSLESKARRWLTEKGSRQEPRKNKA"
     CDS             19465..19698
                     /codon_start=1
                     /product="hypothetical protein"
                     /label=hypothetical protein
                     /db_xref="SEED:fig|6666666.356864.peg.31"
                     /translation="MNLKIFTGQRRGLATLLGKELGVNASLISQWANGDRQVPAERCPE
                     IEKATDGKVTCEELRPDVDWAYLRSTERNQNQ"
     CDS             complement(19666..19803)
                     /codon_start=1
                     /product="hypothetical protein"
                     /label=hypothetical protein
                     /db_xref="SEED:fig|6666666.356864.peg.32"
                     /translation="MSAGAVKFLLSTVSYLFLWFRPALLCRKNAARKWRLLILVSLSAA
                     "
     CDS             19856..20287
                     /codon_start=1
                     /product="hypothetical protein"
                     /label=hypothetical protein
                     /db_xref="SEED:fig|6666666.356864.peg.33"
                     /translation="MAQQLAHDGTYNALSNRVRQVGGQMVPFGMAIQMEAISSRTDITQ
                     AMCKRAGGVFVKLPDVEQTDNEELLVKFNELLASLGAFAAAHNEFTADGVLDRDETKRM
                     RAKGYRVQSLVAEIMVVTEMLFGEGDASSVQPLASGACN"
     CDS             20483..20659
                     /codon_start=1
                     /product="hypothetical protein"
                     /label=hypothetical protein
                     /db_xref="SEED:fig|6666666.356864.peg.34"
                     /translation="MGEQIAELDRRYRDQYGKIVHVIGYDRQNERVIFMREGYEHECVS
                     PLWQFQAKFTRVS"
     CDS             20656..21678
                     /codon_start=1
                     /product="Replication protein O"
                     /label=Replication protein O
                     /db_xref="SEED:fig|6666666.356864.peg.35"
                     /translation="MSVKLSAFVWDGCASSGMKLASVAIMARLADFSSDDGVCWPSIET
                     IARQLGAGPSTVRTTIARLEKDGWLTRTQRRKGNRNASNMYQLNVAKLYAAAQSHLSDS
                     DPSKSDTSNSDASKFDPSKSSKKGGFHPPESGGDPSVNSKHDPSDKKTPCPPAEQPDPE
                     VDLTDSAKSVLSHLNQVTGSRYQVSKTSLENIRARIGEGFTVDELCLTVDYLNAKWGAD
                     LNMAEYLRPVTLFQPTKFPGYLEGARKWDVAGRPVQRDGKWFTQEGQSLSADHTERDAA
                     YRRFIGSALPTNNPSQIETQVRAEASKAGLKSSKPEFAMSRWNSIWKDVAQRQLGGKAA
                     "
     CDS             21675..21899
                     /codon_start=1
                     /product="hypothetical protein"
                     /label=hypothetical protein
                     /db_xref="SEED:fig|6666666.356864.peg.36"
                     /translation="MILDDIELAKQLEEKQLWRRAARQWLTVMDRTKGTTERGLVATRR
                     SICLGRARMTTQQYSGVRVMTVAGGVLND"
     CDS             21892..23430
                     /codon_start=1
                     /product="Phage NinC"
                     /label=Phage NinC
                     /db_xref="SEED:fig|6666666.356864.peg.37"
                     /translation="MTDKKAIQVVSFSGGRTSGHLVHLMEQRRIAGEDVRYIFTDTGAE
                     HSKTYEFIRNIVKHWGIDLICLRLVINPELGKGNSYKVVSVDEIGPDLQPFRDACSKYG
                     TPYVGGRFCTRTMKIEPFHRYCKDHFPEHEKWLGIRIDEPKRLTPKEGVHYLADISDME
                     KKDILAWWKQQPFDLDLPEHLGNCVFCIEKGINKIALAARDEPQLAAEFWQLITDPSVR
                     VVDRRQQANKIMYRGNHSLESVIALYADKSREDIAATIRGNGGYESGSCTESCEAFACG
                     FDGEDLLVDEIETAPANEYVASLNAYKAAPAHELKKVGDQLCTPDPLFWGINAMFGPLV
                     LDLFSDGENSKCEAYYTAEDNALAQDWSSCLAELNGAAFGNPPYSRAKQHEGQYITGMR
                     HIIDHAMEMRELGGRYVFLIKSATAEVWWPEEADHIAFIRGRISFDLPTWFKPKDATQI
                     ASSAGFGVAIAVFDKQWRGPASAYIECDRLYAQGEAFMAQIRREAERMTRRAAA"
     CDS             23427..23774
                     /codon_start=1
                     /product="hypothetical protein"
                     /label=hypothetical protein
                     /db_xref="SEED:fig|6666666.356864.peg.38"
                     /translation="MIKGPLISSQRYLDREKVADKAYRFTKFYVEVYPVVLHGNQYTLI
                     MDGHHNYAASRLAGVEPTYRPIRKKLAKIFSGMTQREIEVFLINNLTDSHLYYVESGEV
                     VEELTMPEVRA"
     CDS             23825..24136
                     /codon_start=1
                     /product="Holliday junction resolvase / Crossover junction 
                     endodeoxyribonuclease rusA (EC 3.1.22.-)"
                     /label=Holliday junction resolvase / Crossover junctio
                     /db_xref="SEED:fig|6666666.356864.peg.39"
                     /translation="MRGTKISAGGRTFRANAIASIYETLRHRPKPIATSVEVHVVLYPP
                     TRQSRDLDNYQKALFDALTHAGVWEDDSQIKRMLVEWGPVTKGGKAEIVISDFQAGTE"
     CDS             24133..25158
                     /codon_start=1
                     /product="Putative cytoplasmic protein"
                     /label=Putative cytoplasmic protein
                     /db_xref="SEED:fig|6666666.356864.peg.40"
                     /translation="MRALLRAVTVPELGQVILRPGKELLSLFTGRVLVVSEPDELKGLP
                     SGLLPSQEQQLANDPRWRSFLTNERVINTAGGTDSLINWLNQAMVCQRESEYHSQHMTT
                     LKYGNSAIRLCWHCDNLVRDHETPVLNEIADRNAAEWVIHQARTWLTLPEGHQVTAHEL
                     SWWSVVKGVSDLLPAHAIRISLRMPAPEDKPGPQRECDIEWTTPVRDIIDERIERVKPV
                     IRLVEDAEPPAGFMLRPKLQRMECEKYTRWVKSQPCACCGAPADDPHHVIGYGLGGMGT
                     KTHDLFVIPLCRRHHDELHRDVAAWEAEYGSQLLLLVQTLNRAFGIGAISIGKLKGVEN
                     E"
     CDS             25151..25495
                     /codon_start=1
                     /product="antitermination protein Q"
                     /label=antitermination protein Q
                     /db_xref="SEED:fig|6666666.356864.peg.41"
                     /translation="MSDMYERLDRWGAWAASEQSGVDWQPIAAGFKGLIPHGKKSRSQC
                     SDDEGLMIDGCVARLRKYKPEEYDLVVAHFVLGISLRAIAKKRKCSDGTIRKEMQTAEG
                     FIGGCLAMLN"
     CDS             complement(25537..25947)
                     /codon_start=1
                     /product="hypothetical protein"
                     /label=hypothetical protein
                     /db_xref="SEED:fig|6666666.356864.peg.42"
                     /translation="MIEEKKPFISAKNSAATGGLGALLTTLVPPLLPDADDPWRPALYA
                     LAPILSAIITYFMNWVINRHGLETPAEASLRNRSERDLKNIDKQLLSPNISPAFRVELL
                     KDREKTVRQLVNIGKTVQVADASSPTDTVDTE"
     CDS             complement(25944..26201)
                     /codon_start=1
                     /product="hypothetical protein"
                     /label=hypothetical protein
                     /db_xref="SEED:fig|6666666.356864.peg.43"
                     /translation="MLAEQVLQLIGWIGGILCLPTFYRFAYASFSLLWRKIFPTRKLEI
                     TLIDEEEKTKRTFFLRLDRKDGRSLVRILDDALAQSKAKQ"
     CDS             complement(26209..27090)
                     /codon_start=1
                     /product="hypothetical protein"
                     /label=hypothetical protein
                     /db_xref="SEED:fig|6666666.356864.peg.44"
                     /translation="MEQTTSFKVFYDADDNELSHHAIDAETLGNSILSMTKLITKADDL
                     LNDGQKSVKVLVTNPAEAGSLGIAYTIIQLLPDAIDVLRTIGITGAVGAAGGASALSLI
                     RQLGSSRVITMTRKAGTQTTILELEGEEIECPTPVAALVTDPTIRDALISVIQTPLEGK
                     EDPVFKILNENDEVVIRLEGGQTEEVKPLPRGTLLQKEIEIREVNVKFTQVNFQSEKGW
                     RMEYNNEEHSVLLNDFEFLAKVRQAEGAISSDDLFSVTLEITKTFTARNVTEKYIIKKV
                     IRHRADASRRII"
     CDS             complement(27093..27218)
                     /codon_start=1
                     /product="hypothetical protein"
                     /label=hypothetical protein
                     /db_xref="SEED:fig|6666666.356864.peg.45"
                     /translation="MIFNMKRCILKTTKYIQQPNKFSSNANYMDCMCFYNENDKG"
     CDS             27378..27665
                     /codon_start=1
                     /product="hypothetical protein"
                     /label=hypothetical protein
                     /db_xref="SEED:fig|6666666.356864.peg.46"
                     /translation="MGFNFRAICFRVARNNYDFLVLDSTFGCFGLSQNNHLSVIYGSAA
                     GCCVRLTSLLSLAPMPTTLCCVVFYFNDTICMIIDVRQRQLFKTISCANS"
     CDS             27816..28670
                     /codon_start=1
                     /product="DNA/RNA endonuclease G"
                     /label=DNA/RNA endonuclease G
                     /db_xref="SEED:fig|6666666.356864.peg.47"
                     /translation="MKLNFIKLLPALLLGACSTHQPQETAEQPQTEITAPAPARQAAVA
                     SVAAVSKDNCLVGCPVGGSSQTLVRDAYTLNNNASTRFANWVAYKMTSATQASGRSRTW
                     RQDPDLPAADTLAPAAYTGANAAIAVDRGHQAPLAGLGGSSDWQSLNYLSNITPQKADL
                     NQGAWVRLEDKERALSNSKTVYTVTGPLFERNIATLPNAPAVQIPSGYWKILFTGSSPA
                     DGKYAAFIMDQNTPRNANFCNFQVTVSQIEQKTGLNIWSSLPANVANTIKAQKGSLGSD
                     LGC"
     CDS             28779..29123
                     /codon_start=1
                     /product="Phage holin #Lambda-like group I holin"
                     /label=Phage holin #Lambda-like group I holin
                     /db_xref="SEED:fig|6666666.356864.peg.48"
                     /translation="MKMQNNIHTWADLWELFRAWWNGDVPMGGVLLSIVVTGLRVAYTG
                     GGWRKMMLEAALCGALTLTVVSALEYYDLPKSLTMAIGGSIGFIGVEQIRAVALRFLGN
                     RFGGGNADQR"
     CDS             29107..29547
                     /codon_start=1
                     /product="Phage lysin (EC 3.2.1.17) # Phage lysozyme or 
                     muramidase (EC 3.2.1.17)"
                     /EC_number="3.2.1.17"
                     /label=Phage lysin
                     /db_xref="SEED:fig|6666666.356864.peg.49"
                     /translation="MQISANGINLIKQFESCELTAYQDVVGVWTIGYGWTQSVDGKPIR
                     RGMTIGAATADRLLKTGVVQYEQAVNQLVRVPVNQNQFDALVSFAYNLGIRSLSTSTLL
                     KKLNAGDYAGAADEFPRWNKAGGKVLTGLTRRREAERALFLS"
     CDS             29544..30074
                     /codon_start=1
                     /product="Phage outer membrane lytic protein Rz; 
                     Endopeptidase (EC 3.4.-.-)"
                     /label=Phage outer membrane lytic protein Rz
                     /db_xref="SEED:fig|6666666.356864.peg.50"
                     /translation="MNIVTNWKIATGTLVVGIITGGAFCWWITSTSYDADIATLKTEHA
                     LVVKSVSDKAAEDSEAARSREHGFQQQIAALDTEHTKEREDAKRENERLRNDIVSGKRR
                     VQFASAALATCEQSAGAVRSAGSMGNATAVKLSATAGRNILDIRAGIKDDQAKLVYLHG
                     YIRALQQQGVIAN"
     CDS             complement(30131..30535)
                     /codon_start=1
                     /product="hypothetical protein"
                     /label=hypothetical protein
                     /db_xref="SEED:fig|6666666.356864.peg.51"
                     /translation="MKTNFLTAVPLIIASSGAVNAEGVSMAEYQQVQSINQCAYIANIM
                     MADNTVQVMKLALSRYVSMASKMSPDGYNPTPSDLAIDYAIFFQQKVSDTEYEMFQQIN
                     KRGLPLAPGSWVLVARDWWVVKQCSLVTGL"
     CDS             30882..31241
                     /codon_start=1
                     /product="hypothetical protein"
                     /label=hypothetical protein
                     /db_xref="SEED:fig|6666666.356864.peg.52"
                     /translation="MSKKTTILYYVMVTFDITVGDKSNIYSEVSDLLEKNGLTKDCDGN
                     ELPENVYFGTRKAEITYEGEVLTQEDIKARGVRITKRYYDLLKEFFNEKKIKYKIFITA
                     SRKSTTAIRYTISKK"
     CDS             complement(31435..31875)
                     /codon_start=1
                     /product="hypothetical protein"
                     /label=hypothetical protein
                     /db_xref="SEED:fig|6666666.356864.peg.53"
                     /translation="MYEKYLDVRKVIRCVEHKKKLDEVASNLKKELIDSMNASDFQKSA
                     FSLDQNTDGLITLKIDIYDIEITFKERLIVINDVPLLKFTGEYDDGDCLKETTCFFLGK
                     NALVYVDEYKPNPSYDYNDSSLFLEITASVLKSLKSVGRISY"
     CDS             31940..32290
                     /codon_start=1
                     /product="Phage holin"
                     /label=Phage holin
                     /db_xref="SEED:fig|6666666.356864.peg.54"
                     /translation="MPARIPRACRKHGCGSTTTDRSGYCEQHRNTGWESHQQGKNRHER
                     GYGNDWTIRRARILQRDNHLCQECLRNGRAVAAKTVDHIKAKAHGGTDDDSNLESLCWP
                     CHRTKTGRERLK"
     CDS             32526..32882
                     /codon_start=1
                     /product="Phage terminase, small subunit"
                     /label=Phage terminase, small subunit
                     /db_xref="SEED:fig|6666666.356864.peg.55"
                     /translation="MSDTAIRMWKTQSKILIERGTFELEDAPLLLAYCNSFHLMITAEK
                     VITKQAEIDLENMGLADLGGTGGLKKHPAVAVRNDCVSQLARLGSLLGLDPLSRIRMIG
                     GTEGDEEENEFDEF"
     CDS             32885..34606
                     /codon_start=1
                     /product="Phage terminase, large subunit"
                     /label=Phage terminase, large subunit
                     /db_xref="SEED:fig|6666666.356864.peg.56"
                     /translation="MASYPNVNAAQQYAREVISGKIPACKYVIAACQRHFNDIEKAKNK
                     NWPYRFDRDKAERACRFIQCLPHTSGKWAKQKLKITLEPWQQFIFCMVFGWVKKKNKMR
                     RFREAYTEVPRKNGKSLFAAGVGTFMFCADDEYGAEVYCGATTERQAWKVFRPALLMAQ
                     KLPNLRKRFQIKPWAKKMTRPDGSVFEPIIGDPGDGDSPSCALIDEYHEHATDTQYTTM
                     TTGMGARTQPLAWIITTAGFSLECPCYEKRRQVAEMLDDVIPNEELFGIIYTLDDGDDW
                     TKPEALAKANPNMGISVEEDYLLAQQRLAIDVPSQTNKIKTKHFNLWVSAKSAYFNLEK
                     WKACADTSLKISDFYGEESHLGIDLASKLDLNCVCPVFTREIEGRTHYFCVGAQFWVPE
                     DTVFSPDPKLKRTSDRYQKFVNMGKLISTDGAEVDNRQIFEHIVSMNETVKVMSTPIDP
                     HGATSLSHSLADEGLGPITIIQNYTNMSSPMKELEAAIASGRFHHDGNPVMTWCISNVV
                     GKTIPGSDDVVRPTKEGDENKIDGAVALIMAIGRAMLNEPKDFLSTLDPDEDLLML"
     CDS             34603..34761
                     /codon_start=1
                     /product="hypothetical protein"
                     /label=hypothetical protein
                     /db_xref="SEED:fig|6666666.356864.peg.57"
                     /translation="MKSLITDVIGLAGFGSLAAGVYLQFGLAAALILCGVLLLIFALAA
                     ARGKNAT"
     CDS             34751..35974
                     /codon_start=1
                     /product="Phage portal protein"
                     /label=Phage portal protein
                     /db_xref="SEED:fig|6666666.356864.peg.58"
                     /translation="MLLDTLFRNEPLENPATPLTGDSAETDNIFGRDVYVSPETAMKLA
                     AVYACIYVISSNIAQMPLHVMRKSDNKVEPARDHPVFYLVHDEPNTWQTSYKWRELKQR
                     HILGWGNGYTWVKRGRRGEVTALESCMPWETTLLNTGGRYTYGVYNEEGAFAISPDDMV
                     HVRALGNNQKMGLSPIMQHAETIGMGMSGQKYTSSFFNGNARPAGIISVKNDLNAESWV
                     RLKAMWQKAVAALRSEENKTMLLPAQLDYKALTVSPVDAQIIDMSKLNRSMIAGIFNVP
                     AHMINDLEKATFSNITQQAIQFVRYTIMPWVTNWEQELNRRVFTRAERAAGYYTRFNLT
                     GLLRGTPQERAQFYHFAITDGWMSRNEARAFEDMNPVDGLDEMLVSVNASNPANNFNDT
                     TKEEQPNE"
     CDS             35967..36566
                     /codon_start=1
                     /product="Phage head maturation protease"
                     /label=Phage head maturation protease
                     /db_xref="SEED:fig|6666666.356864.peg.59"
                     /translation="MNDRELRCYSGEVRTEQAGDGPAHIVGYGSVFNSRSEPLWGFREI
                     IKPGAFDEVLGDDVRALFNHDANFILGRSAAGTLVIGIDDKGLRYDITAPDTQTIRDLV
                     LAPMARGDISQSSFAFRVARDGEHWYEDEEGIVIREINKVSRLFDVSPVTYPAYQEADS
                     ALRSMAAWQEARDSGALQKAINEKMARERLLNLINA"
     CDS             36575..37801
                     /codon_start=1
                     /product="Phage major capsid protein #Fam0089"
                     /label=Phage major capsid protein #Fam0089
                     /db_xref="SEED:fig|6666666.356864.peg.60"
                     /translation="MKYHELKQKRNTIATDMRALHDKIGDNTWTDEQRTEWNKAKSELD
                     GLDTQIAREDELRRQDQSYVDDNEREQRQQQQNNGDPAAQAQEKRQAAFDRFLRNGFAE
                     LTSEERQALKELRAQGTTPDAKGGYTVPTQMLNKVVDSMKAYGGIASVAQILNTSNGQD
                     ITWSTSDGTSEEGELLGENTEASEEDVSFGTAILGAKKLSSKIIRVSNELLQDSGVDIE
                     AYLAGRIGQRIGRGEAKYLVQGTGAGTPVQPKGLVASVTGTVNTAAAATFTWKEMNSLK
                     HAIDPAYRGVPKYRWAFNDSTLQIMEEMVDDQKRPLWLPDIAGGSPATILNIPYVIDQA
                     IDNIAAGKKFAFLGDFNRFIVRRITYMTLKRLVERYAEYDQTAFLALHRFDCVLEDVAA
                     IKALVGKPA"
     CDS             37761..37889
                     /codon_start=1
                     /product="hypothetical protein"
                     /label=hypothetical protein
                     /db_xref="SEED:fig|6666666.356864.peg.61"
                     /translation="MWRLSKRWWVNQHNWKSELTHAAQAVFLCLQSGNGLQAEWFL"
     CDS             37886..38185
                     /codon_start=1
                     /product="Sb8"
                     /label=Sb8
                     /db_xref="SEED:fig|6666666.356864.peg.62"
                     /translation="MIPTVKELRNQCRIDSDDASEDEVLTLYCAAAKRRAENYINRTLH
                     DDSAPENDSEGLVISPDIKLALMLAVGFWYENREAQNLPTGFFVILEPYRFIPL"
     CDS             38182..38523
                     /codon_start=1
                     /product="Phage capsid and scaffold"
                     /label=Phage capsid and scaffold
                     /db_xref="SEED:fig|6666666.356864.peg.63"
                     /translation="MNIGKMRHRVTIQNFTTTRDAGGQPIETWNDIATVWAEVSPISGR
                     ELVSSGAVSAEATIRVWMRFRRDVSAASRLYCLNGPFKGLALDIIGPPIPDGKCTRLEI
                     LCKLGVKRD"
     CDS             38516..38965
                     /codon_start=1
                     /product="Phage protein"
                     /label=Phage protein
                     /db_xref="SEED:fig|6666666.356864.peg.64"
                     /translation="MIDFGLDFSGLSEIAKDLEKLSRAENNKVLRDATRAGADVLKEEV
                     IDRAPVNTGKMRKNVVVVTQKSRRKGEISSGVHIRGVNPNTGNSDNKMKASNPRNAFYW
                     RFVEMGTVNMPAHPFVRPAFDVKQELAAQAAIQRMSTAIDEALSR"
     CDS             38962..39309
                     /codon_start=1
                     /product="Phage protein"
                     /label=Phage protein
                     /db_xref="SEED:fig|6666666.356864.peg.65"
                     /translation="MTETDIYPLISDLSGGNVYPYIIPLNAEGEPAISPPWVVFSFVSQ
                     PSADVLCGPAETTSSVQFDVYAKTIAQAREICAEVIAALSPLAPGNQMLTQGHDTESSL
                     YRCTAELQFID"
     CDS             39370..40077
                     /codon_start=1
                     /product="Phage neck whiskers"
                     /label=Phage neck whiskers
                     /db_xref="SEED:fig|6666666.356864.peg.66"
                     /translation="MTALYEKSQKTVIRISSAPTTLEGIESATFLDLSCTIKEIQFTGG
                     QKNDIDVTTLCSDEMENINGLPAQSEVSLSGNFYRNAAQDALRDAYDNDTRYGFEVIFP
                     SGNGFRFLSEVRQHTWSSGTNNVVAATFSLRLKGRPTNIVPGPLAFTTNLPATRTVATG
                     AALALAVAVSGGLAPYSYKWLKDGTVLSGRTAASFNKSTADAGDAGAYTCEVTDSASSP
                     VTITSASCTVTVS"
     CDS             40095..40469
                     /codon_start=1
                     /product="Phage tail assembly chaperone"
                     /label=Phage tail assembly chaperone
                     /db_xref="SEED:fig|6666666.356864.peg.67"
                     /translation="MAKKSIKSLALAPGAGFLTKAIEVPEWEGVKVILREPSAEAWLRW
                     QDAVKTDDDGESLSVSERARRNLHADATLFIDILRDEDGEPVFSVDDIEEVETIYGPVH
                     SRLLRQALDIINDTEIAKKK"
     CDS             40493..40768
                     /codon_start=1
                     /product="Phage protein"
                     /label=Phage protein
                     /db_xref="SEED:fig|6666666.356864.peg.68"
                     /translation="MALALRMGRTLSELRQEMTANELRMWIEYDKLSPIGDSRGDTLAA
                     QIVSAIWGAQGVKVPLTDAMLDWSGKEEEEADQFGNLEAFLSMAAG"
     CDS             40807..41043
                     /codon_start=1
                     /product="hypothetical protein"
                     /label=hypothetical protein
                     /db_xref="SEED:fig|6666666.356864.peg.69"
                     /translation="MSTSGWIIVFLVARVIDLFIWYLLNRSSVRANEQIKILQEINEKQ
                     SAQLELLTSIVHKKDGPEKDYLEEARRRAGLTD"
     CDS             41088..44384
                     /codon_start=1
                     /product="Phage tail length tape-measure protein 1 # 
                     Enterobacteria-related"
                     /label=Phage tail length tape-measure protein 1 # Ente
                     /db_xref="SEED:fig|6666666.356864.peg.70"
                     /translation="MATLRELIIKISANSQSFQSEINRASRMGADYYRTMQNGGRQATA
                     AARESQRTFAELNNQFVGIKSAAAGIVGAMSVTSLITMADNWGQVTSRMKMATESSDEL
                     AMVQRRLMEISDRTYKPIEEQAELFIRSSNAMKELGYSTAGTIDFIDSISSALTINAAS
                     ADKGQSAINALSKSMVQGKVSGDEWNTVMEVMPTVIGDIARAMGTTETAVKKLAADSKL
                     SMQQFADAVIAAQQKNAELAENMPTTVGDAVTKLSNHMKKYVGEANSAYGTTQALSGGI
                     SSLADNIDTVATAGAALVGIGFARYFGGMASGAYSATAGIISAAKSEVALAEAQLRGTQ
                     IAVARARSAVYRAQQALAAARGTDAQAAAEKRLAATQAAVARNVVARTAAQTTLNNVTA
                     VGSRLMSGALGLVGGVPGLLMLGAGAWYYMYQKQEQARRSAQEYASTIDEIRKKSGAMS
                     LADASDNYNKTQSSLSEQNRLIDEQKEKIRLIRVEIEGYQKILANPGLTVGGYMVNHLV
                     SVEDATNGLSAATEGLSVEQDRLSRLQGKAQDIQSVLVGLEYRRSELIKQQTADQNAAY
                     QSLLRMNGQHTEFNRLLSLGNDLLSARQGNASFPFRVPNAKLTDKQTDALEKSRQDLEL
                     SKLKGEAKELARLRYSADELGLTDNPANQKSRQDYINNNLDKWRNDEANKPTKKGPKTD
                     EEKAIDNYDRLIKQQREQLALGSSNTELAKIKYQTTQGELSTLTSIQKQELARNAALID
                     QAEIRKRAAEYENGLIDSNANAKAANDTNLTGFGEGSRVRDRMNEMIAIRRDFIQKDDE
                     LRRQHQAGEIDDEFFNRAIALNKRYLDKRLSDQQMYYTSLDDQRNNWIGGMRDGFADWA
                     DDATDYATQASQGMKTAMSSAVGSITEMLNGNKNSWKDWGVGVLKIIQSVLINMAVANA
                     ANGASSIIGTVFGIGASAMAGGAGAASANNAFSTGAYSNLTFNALGGVYDSPSLSAYSG
                     GVYSTPQMFAFAKGAGVFGEAGPEAIMPLTRAANGSLGVRAIMPDIQSTNSGGNVYVTI
                     NESGTASVSGNGDQNFAREFTQIIQREYRKLRDKDLSQNGVLNRAISGRR"
     CDS             44384..44734
                     /codon_start=1
                     /product="Phage minor tail protein #tail protein M"
                     /label=Phage minor tail protein #tail protein M
                     /db_xref="SEED:fig|6666666.356864.peg.71"
                     /translation="MEIFTFCPRVNPEGAFTQRTRSIQFGDGYTQRSGDGINGESQSWP
                     LTFVGDAEYVQPIVAFLRRHRGYAAFQWVNPLTEPGLYCCPDGFNVTALGKNSSGAQIL
                     QLTATFVTAYHA"
     CDS             44780..45190
                     /codon_start=1
                     /product="hypothetical protein"
                     /label=hypothetical protein
                     /db_xref="SEED:fig|6666666.356864.peg.72"
                     /translation="MKKIIFIFLGIAVLSGCSRPHGPAEKILNPELVTPNVSEQQTKIT
                     VTRNKQFIGGGSGGMCKFLVSIDDRDIALLKQNQFVTAYINNGLHKLRVSNECNVLSMG
                     MRKTLDVVADGADQEYVTEIGMWGQYRMWRVK"
     CDS             45263..46015
                     /codon_start=1
                     /product="Phage minor tail protein #Phage minor tail 
                     protein L"
                     /label=Phage minor tail protein #Phage minor tail prot
                     /db_xref="SEED:fig|6666666.356864.peg.73"
                     /translation="MSLNTDSQKLEPGDRVRLFEVDCTAFDGPELYFHNHPIQHTAAEI
                     EAAGGDEAKLLAKSIWWQGQEYKAWPTQIEGLEMTSDGSAPTPTLSVGNIDGTITALCL
                     AYQNLAQAIVRIHTTFAHYLDVRNFPDGNADADPTQERLEVWYIDSKIREDDTAISFQL
                     SSPADLRGIMLPTRQIHSLCTWCQRGQYRGASCGYTGTNYFDADGNPVDDPALDECSGL
                     LSTGCKPRWGEDAELPFGGFPGSALIKR"
     CDS             46018..46746
                     /codon_start=1
                     /product="Phage tail assembly protein #Phage tail assembly 
                     protein K"
                     /label=Phage tail assembly protein #Phage tail assembl
                     /db_xref="SEED:fig|6666666.356864.peg.74"
                     /translation="MKLRKLIITEILAHAELDYPRECCGVIVQNGRKQRYVKCRNTATE
                     PNDQFSMSPDDYAEAEDTGTIIAIVHSHPDATTQPSNLDHAQCDLSQLPWVIVSWPEGD
                     IRTIMPSEGVKPLLERPFVHGIWDCYAIVRDWYQLERGITLPDFERSDGWWDRGEDLYI
                     KHYASGGFTAVSSELQPGDVIIMQVRADEPNHAGVYIGSGEMVHHMYNQLSQNVPYGGY
                     WLDRTITRLRYTGGANVGSN"
     CDS             46730..47329
                     /codon_start=1
                     /product="Phage tail assembly protein I"
                     /label=Phage tail assembly protein I
                     /db_xref="SEED:fig|6666666.356864.peg.75"
                     /translation="MSVAIEYQPLKTIRLYGVLGATFGRVHRLAVESRQEAIKALSVII
                     PGFEKFLLTSKSRGLTYAVFDGKRNLSKDELDFNISSEIRIAPIIIGSKQTGLFQVILG
                     AILVVAGYFTFGTTSTIGVSMMMGGASMALGGVIQMLTPMQGGLSMRESPDNKPSYAFG
                     GPVNSIAQGNPVPILYGRRRIGGAIISAGIYAEDQQ"
     CDS             47387..50821
                     /codon_start=1
                     /product="Phage tail fiber protein #Phage host specificity 
                     protein J"
                     /label=Phage tail fiber protein #Phage host specificit
                     /db_xref="SEED:fig|6666666.356864.peg.76"
                     /translation="MQSVIEGRKGGSSNARTPVESPDSIQSTSYAKMLLALGEGEFKGG
                     LDGTRIFLDGTPITDANGNANFSGVTWEFRSGTPDQSYIPGFPGVENEITVSTELTSQI
                     AWVRSLTNTQLSAARLRFSWSALQQQYDNGDVGGYRVEYAIDVATDGGSYQQLLRTAVD
                     GKTTTKYERSHRIDLPSANTGWQIRVRRITPNSTSNRIADRMVIEAITEVIDAKLRYPE
                     TALLLVQFDAKQFQNIPAVSCEPDGRIIRVPSNYDPVARSYSGAWDGVFKWTWTNNPAW
                     IYYDIQISERFGLGNRIRAENLSITKWDLYRIAQYCDQLVPDGRGGSGTEPRFLCDVYI
                     QSQEEAWTVLNDLGAIFRGATFWANNQMNVVADMPRDIDYIVTRANVRDGKFTYSNASE
                     KTHYSQAMVSWSDPANAYQDAIESVNDNKLVRRYGIKQADVTAIGCIRQTEAIRRGKWI
                     LHTNDADRAISYTMGLDGDIPVPGSIVGVADALLAGRPLGGRISAVDGRNIILDRVSSA
                     AVGERLIINLPSGTAQGRTIEAVNDKIITVTTEYSETPIPESVWAVDATDLALQLYRII
                     GVAEGDDGVSFDITGIQYDPDKWDKIDTGARIESRPISVIPPSVQPAPANVSINSYNAV
                     DQGINITTLRVTWDRAESAIAYEAQWRQDNGNWINAPRTSALGFEVSGIYAGQYQARVR
                     AINAAEISSMWANAQETTLNGKEGNPPALSSFTTTPLVFGIKLDWVFPADTADTLKTEI
                     QYSPTSAGQNALLLADVAYPTRSYQQMGLSIGQEFFYRARIVDKSGNQGPWTGWIRGES
                     STDVSDITDVIVKEVTDTEAWKSLIDPLERDIASGMLNSIEQAKAIIRNSLANDSETRR
                     WRAQNGERTAEITETRAAVANEVEARTIAMLEMQSQIGTTNSNLNALQQTVTTLEQTTA
                     QDITSLNSKMTDAESGISANSSAVQGLKTSVSNIDGQLSAQVTQISTLTATVNGVSTEI
                     SDVSSVVNGMDAKMSAYRSIKVAVDANGRQYIAGIGFDVSNNQEGMQANIIMLADRFTM
                     MVNAGGVPTPIFTNQGTQVILRSAVIGDATITSAKIADSAINNAKIGNAIYSSGYKESG
                     GLGGWLISKPENNLSFVDSGKRLRIQIGVITGVAPDV"
     CDS             50814..51830
                     /codon_start=1
                     /product="Phage protein"
                     /label=Phage protein
                     /db_xref="SEED:fig|6666666.356864.peg.77"
                     /translation="MSELIDIMVTPDMLNNKQILISGCVSVRYLQTITLPVPTNNQMSY
                     FSWDYHIANKTPSSILLPVIVTAGNWWMQGGGGVVPFRINNIAKLAVNGDVVRAEIESI
                     AWGSRQEIPNSGVIDVYEILTNDTQERSDFGLLITDGVDWTQFNSTSEICAMVHRETVV
                     INGAGWVLPPHIGDRRRCIIFGDWSSSDSAIQYDSLNYKISRIGADIEVDIYVFSVGAN
                     LTTPTVGIAVYNEMGNITFSSENVPIIYPNTEFNPKRNAQLLPHTKNLVQIRDYGHKVD
                     TELDRVLIRKTALMKIGNRANLVRGDLIFNDQTKIGIHDIEFVSSNLMVLDGNKYGN"
     CDS             51896..53542
                     /codon_start=1
                     /product="alternative bacteriophage tail fiber C-terminus"
                     /label=alternative bacteriophage tail fiber C-terminus
                     /db_xref="SEED:fig|6666666.356864.peg.78"
                     /translation="MSWYKTGFVTVTNNSKIITGTGTQFTNPLNGVSAGRMLLLPGAGT
                     VQIYEIESVQSDTQLTLVSAFEGTTGSGKPYAIPTSPSVSIEQFAHEFASTLAYYQQQL
                     QGWQSILTGSGDITLTAPDGQTITVRSQAEWDRLLSQATTDISDAMKKSANGSDISNVA
                     AFRQNIGLQNAMLIGQFGWGGKVPRIPDNVDLLEYFTSSRPTGLYWGGPALNKPAGFTD
                     VLYEWLTIEVETGLFYGTLTAYNFTPGAGGYKIAGLEVFNNQWGVWGYVWDTKNLPSPV
                     TESTAQWITGDKGFKRDNHAFTISSATPEAASYIIAQNSNGVNLWYLGKGSSGPIGNIS
                     LYNYKGLCGVDLNSNGSVNINAAAFHHNGHDVLSNGLNAVADSGGYWKTASPVINIYAD
                     GSFTTTDEAAGVKVERLSEGVYKITGCQGMHPDAAWNGIDGGVSNPKCRNDKALLWNNY
                     EVDDDGSVTVHTFHRVHPDAMPFAQNRLTLDKEPFDPKKGHTSDMEWPDQTPIDVPRGL
                     FIQVRVNMPERIETKPVVSHSNVYCNTISPV"
     CDS             complement(53543..53764)
                     /codon_start=1
                     /product="hypothetical protein"
                     /label=hypothetical protein
                     /db_xref="SEED:fig|6666666.356864.peg.79"
                     /translation="METITYHGTTICVLDDSDMLTDCPVGSYAVIEDSGFYVAVRVGET
                     DAPAIHIDPVPTLEDALDIIAGQLSFFA"
     tRNA            complement(53882..53955)
                     /product="tRNA-Pro-GGG"
                     /note="/transl_table=11"
                     /db_xref="SEED:fig|6666666.356864.rna.1"
     CDS             complement(54034..55740)
                     /codon_start=1
                     /product="FIG001881: hydrolase of alkaline phosphatase 
                     superfamily"
                     /label=FIG001881: hydrolase of alkaline phosphatase su
                     /db_xref="SEED:fig|6666666.356864.peg.80"
                     /translation="MISWGHWFALFNILLTLGLGSRYLFVADWPTSLFGRIYALVSWLG
                     HFSFIVFAAYLLVIFPLTFIVMSQRLLRFLSAALATAGLTILLVDVEVFTRFHLHLNST
                     VWELVINPGQGEIARDWQWMFIGIPLIFMAEMLFGTWCWQKLRSLNRRHFGKPLAGVFI
                     SAFFASHLMYIWADANFYRPITMQRANLPLSYPMTARRFLEKHGLLDAQEYQRRLTQQG
                     NPEAMTVEYPLNNITFRDSGSGYNLLMVMIDDTQPDAIKNRMPNLSRFAAENVHFSDHY
                     DSGSQPDAALFNLFYGLSTTYMDGILSARKPSALIAALSQQGYQFGLFSANGFNSPLYR
                     QALLSDFSLPAPQQQSGDAIITQWQEWLNRDNNPAPWFSYVELNSAPKNASSKDIEPNS
                     RMNIQDVDRQIGQIIRTLQEKNILDNTVIIVTTAQNQNANTNNTARFTRTQWQTPLIVH
                     WPNTPAQTITKMTDNKDVMVTLMQRLLHVKNSTDDYAQGEDLFSAQRRYPWLINGNGGT
                     LLITTPEQIIVLESNGNYRAYDMAGNRLNDEKPQLALLLQVLTNERRFIAN"
     CDS             complement(55797..56027)
                     /codon_start=1
                     /product="FIG002927: hypothetical protein"
                     /label=FIG002927: hypothetical protein
                     /db_xref="SEED:fig|6666666.356864.peg.81"
                     /translation="MPQSSRYSDEHVEQLLSEMVNVLEKHHAPTDLALMVLGNMVTNLI
                     NTSIAPAQRQVLARSFAEALQASIKKADKAH"
     CDS             56246..57256
                     /codon_start=1
                     /product="Nucleoid-associated protein NdpA"
                     /label=Nucleoid-associated protein NdpA
                     /db_xref="SEED:fig|6666666.356864.peg.82"
                     /translation="MSLDIAQIALHQLIKRDEQTLEMVLRDSLLSTNAAVEEMMAELHR
                     VYSAKSKAYGLFNEQSELADALRACRKGDEDFLSFSRAATGRLRDELAKYPFAEGGIVL
                     FCQYRYLAVEYLLISVLNSCNSMRVNEQLDISTTHYLDINHADIVARIDLTEWETNPES
                     ARYLTFLKGRVGRKVSDFFMDFLAASEGLDTKAQNRGLLKAVDEYCDEAQLDKNERQNY
                     RQQVYSYCNEQLQSGEEIELASLSQELPPLGEKTFQQFSADQGYELEESFPADRGTLRQ
                     LTKFAGSGGGISLNFDALLLGERIFWDPATDTLTIKGTPPNLRDQLQRRTSGGKQ"
     CDS             complement(57312..58460)
                     /codon_start=1
                     /product="hypothetical protein"
                     /label=hypothetical protein
                     /db_xref="SEED:fig|6666666.356864.peg.83"
                     /translation="MSREISQRLIAIDALRGLVMVLMLLDHVRETFYLHLQLADPIDVT
                     STDPMLFINRTLAHLCAPVFVFLTGLSAALYHQKVQDRRQTALFLFQRGLILIVLEITL
                     INFAWTFQFPPQVIYLQVIWAIGMSMLALSALIWLPARLVFILGLVIVGGHNLLDSLHA
                     SAGSIWSIPWAILHDRSWIEISETLRMRTSYPVLPWIGVISLGYAAGALYRKDIFPLQR
                     QKTLLALAGITLTLFFILRSINLYGDKPWLPGDVITQTLMSYFNITKYPPSLLFICLTL
                     GIGFGLLALFERQQQKHWLVMLASFGAAPMFFYLLHLYVLKGIYLTTVAIWGKNQGEWF
                     GFSAVWQLWVCTLVLMAVLFSPVRAFARLKARRRDIRWLKYF"
     CDS             complement(58560..58844)
                     /codon_start=1
                     /product="LSU ribosomal protein L25p"
                     /label=LSU ribosomal protein L25p
                     /db_xref="SEED:fig|6666666.356864.peg.84"
                     /db_xref="GO:0003735"
                     /db_xref="GO:0005622"
                     /db_xref="GO:0005840"
                     /db_xref="GO:0006412"
                     /db_xref="GO:0008097"
                     /translation="MITIKAEARQGQGKGASRRLRSAGKFPAIVYGGSEAPVSIELDHD
                     SVKNQEVKDGFYGETLILSIDGKEVQVKVQAVQRHVYKPKLTHIDFVRV"
     CDS             complement(59104..60864)
                     /codon_start=1
                     /product="ATP-dependent RNA helicase YejH"
                     /label=ATP-dependent RNA helicase YejH
                     /db_xref="SEED:fig|6666666.356864.peg.85"
                     /translation="MSFTLRPYQREAVSATLDYFRHHTQPAVIVLPTGAGKSLVIAELA
                     RLARGRVLVLAHVKELVAQNHAKYCAWDLAADIFAAGLQQRESQGKVVFGSVQSVARNL
                     DQFDNAFSLLIIDECHRISDADNSQYQQIIQHLQKTNPRLRLLGLTATPYRLGKGWIYQ
                     YHYHGMMRGDERCLFRDCIYELPLRYMIKHGFLVPPDRLDMPVVQYDFSKLVARSNGLF
                     SEADLNLELKRQQRITPHIISQVIDYAQTRRGVMIFASTVEHAKEIAALLPAGQAALVS
                     ADTPPAERDALIDAFKQQSLRYLVNVAVLTTGFDAPHVDLIAILRPTESVSLYQQIVGR
                     GLRLYPGKTDCLILDYAGNPHDLYTPEVGNSKPHAGSQPVQVFCPECGFANLFWGKTTP
                     DGDIIEHYGRRCQGWEMAENGQRQQCDFRFRFKVCPHCGAENDIAARRCHQCNEVLVDP
                     DDMLKAALKLKDALVLRCSGMSFEQGQDAKGEWLKITYHDEEGAEVSERFRLHSTAQRH
                     VFLQQFLRVHQRAPGTPFNWQNAADVIAQQILLRAPDFVVARKNGKFWQIREKLFDYQG
                     RFRRANEIRG"
     CDS             complement(60867..61106)
                     /codon_start=1
                     /product="hypothetical protein"
                     /label=hypothetical protein
                     /db_xref="SEED:fig|6666666.356864.peg.86"
                     /translation="MSSIHGHEVLQMMLASGESFTTEQLITTIETRFGSAARFHTCSAE
                     NMTASMLVQFLSERGKFIPQDAGFTTSASKICQH"
ORIGIN
        1 gcagacggtg aaattttcat ctccgattcg cccaggcaag gcgctgttat gattaactga
       61 tttacacgag ggaaacaacc gttgattggt gttatggcca attaatggag gcaaaagcta
      121 attttttgag cgtcttaacg gataaaatgc gtggtttgtg cggattacac gaagaaagag
      181 ggaagcttga gtggatttat caggtagtaa aaggctgcct aggcagcctt aagtgcgttc
      241 gttataactc acgcgggaag ataatatcga ttattcgatg ttggattcaa tgaaccacag
      301 gaactgatcc agatcgcgtg atgcagcggt cagaatgtct gcagaggctt catcttctgt
      361 tttaccaatg gccttgcgta cattgttcgc gacaatcgca taacgttcgg ccagcgcttt
      421 tagatgatcc tgaacgctat ggatggtagt cggatagctt ttcagtgaag tttgtttacc
      481 gacaatttgc acggtaccca gtgcgatacc acctatctgc acgacgcgtt cggcgatggt
      541 atcctggtgg tcaataatcg aggtgcggaa gccatccaac atttcatgaa cggcgataaa
      601 gtttgcaccg cgcatgttcc agtgtgcctg tttggtaatc aacgacaggt cgatgaaatc
      661 aacaaccagt tggtttaaca gtgcgatcgt cgaggtttta acgctatcgt ccaaatcatt
      721 gcgagtataa agcagttcgg acggtgctga tttcacgagt ttggcggtag acataatagt
      781 tatcctctct ttaattattc aaagtcttac tgttcaacgt gattaattat aacagcgata
      841 aaaattaata ttgaaaagaa ttgcctatca aatgaatagc catagcataa cgatattatg
      901 gttatttgta gtcaggattt ttctgatatc aataatgtag atgtggcgaa atattttaat
      961 ttccgctgaa atacaatgtc atatattgat ggatgtcatt attacatggg tagaaatgat
     1021 tattattcat tggcgttcgc attgaaatag aatgaaggtg ctgtttccct tcttaaaaca
     1081 tatagtgtgt tattgaaagg aatagaggga aatgagaatt aatattattg gtactagcgg
     1141 aagtggaaaa tctacgctcg cacgtcattt gtctgagaag ttggatgtac cctacgttga
     1201 aatggatgcg ttgttttggt tgagtgactg gcaagggaga acggatgccg acttctttca
     1261 acggcttgaa agcgcactgg aatcagatgg ttgggtgctg gatggcaact ataaccgaac
     1321 gagagatatt aaatggcgca atgttgatgt cgtgatatgg gtcgattact gttttacccg
     1381 tacacttttc caggctgtgc ggcgtgccta tcttcgggca tggcgcaaag aggaactctg
     1441 gagcggtaca ggtaacaaag agtcctttct tcgcagtttc tttagtcgag attcgattat
     1501 attctggaca ataaaaacct attcgagaaa ccggaagcgg tatctggcgg atttagctga
     1561 ccctcgttat cgccatatcc gctttattac cctgcattca cctcaggaat gtgaaacttt
     1621 tctgcaacat tttcccgagg aaatgaaata agaacatatt ctatttctat ttatgtcttc
     1681 tcttctttac gtacctctgc tgattttatt gtcaacgttg cgcctagtga ggcggtgata
     1741 ataaatatca gcgccatcca ctgtataaac gcgaggtgtt cgccgaggaa aagtatcccg
     1801 gacaaggcgg caatagcggg ttccatactc attagggtgc tgaatgttct ggcgggtaga
     1861 cgtgttaatg ccaccatttc cagagaatag ggcagcgcag tggacaggat tgcaacggca
     1921 atgccgagcg ggagtatcgt aagcgaaaac agcgtgcttt cagcgtaata tgcgccaata
     1981 gggcagaaga tcagtgcggc aatacaggaa ccaatagcaa cggtgcctgg cccatgattt
     2041 gcccctgctt tttgcccgaa tagaatatag aacgcccagc aggcacctgc actaatggcg
     2101 taggcagccc ccgttaaatc aacatttccg atattgtgac ccagcggcaa taaaaaccac
     2161 aaacccgcaa ctgcaaggaa aacccataga aaatcaatca gtctgcgtga agctaacata
     2221 gcaacggcaa gtggaccggt gaattccagt gcgacggcaa taccaagtgg caccgtctgc
     2281 aatgagagat agaacagaaa attcataccg cccaacgtaa taccataaat caacagcggc
     2341 aggcggttgc tactgaagcg catacgccac ggtttgaaaa tgatgcacag aatgatcgtc
     2401 ccaattccca gacgtaatgc cgtaacgcca gtggctccga tgagcggaaa cagatttttg
     2461 gccagagcag ctccgctttg gatagacagc atcgagataa tgatgagcaa tacagggatg
     2521 aatgatgaca aacggtgggg aaataaggtc attcttttgg ccttaaaaaa ggtataacat
     2581 tccgtcgcta ttatatccaa ttgtaaacaa tttgtctggt atgaattgac ttttattgac
     2641 ctttatttac gcatcattta actgggattt tttcatccaa taccactagc atacaaactg
     2701 agcgagaaat tcagaattgt ctgttttacc gcccggtggt gaatttattt ttaatctaac
     2761 tgtcacaatg aaaacttcaa tataattagt gtgatagatt gattttgaca atatttgtta
     2821 catctaaagc ctaattgata aatatttata gggcggcaag ctccgaactt ctttgttata
     2881 tttactgcgt tagttagtct ttcataaaat gaatttgagg ctgtaaatat gaaaaaaatc
     2941 gcgtgtcttt ccgctctggc ttgtgtatta gccgttggcg caggttctgc atttgctggt
     3001 caaagcaccg taactgccgg ttatgctcaa ggtgatgctc agggcgtaca aaataaagtt
     3061 aaaggtttta acctgaaata tcgttacgag caagataata acccactggg cgttattagc
     3121 tcattcacct acctggaaaa aaatggtagt gatgacggtt tttataacaa aggtcagtac
     3181 atgggcttca ctgcgggtcc tgcttaccgt ctgaatgact gggcaagcct gtacggcgtt
     3241 gttggtttca gccacggtaa agttacaagc aacgacacca atggtctgga taacgccagc
     3301 aatgacgatt acggcttcac ctacggtgct ggtgttcagt tcaatccaat ccaagacgtt
     3361 gctctggatg ttggttacga acaaagccgt atccgtagcg ttgacgttgg tgcctgggct
     3421 gttggcgtag gttaccgctt ctaatctaac cctgtagggt ttttatccct cagtgttggc
     3481 gttagctgtg tcagaagaat ccgctctttt tagagcggat ttttttatgg atttttgtct
     3541 aagccagcaa cgagctttac ccgtaattta tccagtcgcc ttccaaccga tcgatatccg
     3601 gtcgttcttg ctgccattga tcacatgcat actgtaacag cctattataa gatattatct
     3661 tgacgtgaag attctttctg tgaagataat gttcatcagg cagcagtgac ttgtttaagc
     3721 gattgaggtt atacatggta gtggcatcaa cggcccgcac gcgggttttt cttttcttca
     3781 cgattatcct gttggggttg aatttacgcc ctgtcttggc aggcattggt ccgttgttga
     3841 atcatattca ggctgcaacg ggtctggatg acagcatggc agggatgtta acgacgctcc
     3901 ctgtgttcgc tatggggtgg tgcgcgttat atggcgggca attacaggcg cgtctcggtg
     3961 agtatcgcgg aatcacgctg ggtatcgtgg tcattgcctt ggcgtgtagc gcccggtggt
     4021 ggctgaatag cggtattgcg ctgctggtta gcgctgcgct tgccggaatc gggattgcct
     4081 tgattcaggc gctggtgccg tcgtttatca agctccattt tggtcgtcat agcagtcttc
     4141 tcatgggctt ttacaccacg gcgataatga ccggtgcggc gtttgctgct tcatcggttt
     4201 ctccgctggc aaatgcgtgg ggctggcaac gtgcattggc ctgctgggga attgtggcgt
     4261 tggttgcggc ggtggcctgg cgatgcgttc ctaaagcgta taccgcgaag cagggtgcag
     4321 tgaccgtttt agcaacgcgt cgaagtggaa tggactggct gctgatggtg ttctttggta
     4381 ttgggacggg cgcatatacc ttggtgctag catggttacc gccgtattac atgcaactgg
     4441 gattagatgc gacacaaagc ggtctgatgt taggcgcatt aacgatgacg gaagtgattt
     4501 ccggtctgct ggtatcaacg ttcattaacc gttttcccga tcgacggaag ttgctgcttc
     4561 ctattttggc tgtgatgctg gtgggcatga ttgggctgat tgccgccccg ctgacgttca
     4621 cataccctat catcatcatg ctggggattg ggattggcgc gctgttcccg ctgtcgctga
     4681 ttgtggcatt ggatcaggtg actgaaccgc ataaaacggg ttcgctgatg ggttttgtgc
     4741 aaggtggtgg ttatatcctc gccagtttaa tgccgctgct cgccgggttt atacgtcagc
     4801 atacggcggg tctggaacag gcttggatga ttatgaccgt cggtgtggtt gtgttgatta
     4861 tcatggcgac ccgttttgct ccgttgacga gcccgggccg ctaagcatgt tattcttgtt
     4921 gtaagcgagc ggatgtcctc gctcgccatc atcaatctgt cggtgagcga tagcgccata
     4981 gccagcggcc gctcatcagt cggcggtaat agaagaatcc gcgcacaatc caatcaaaga
     5041 acatgcccat ccacacgccg atcacgccaa agccgagcat cacgccgagg atgtatcccg
     5101 cgatgacccg acatccccac atgcctgcca tcgctaccca catggtgtag ctggcatctt
     5161 ttgctccttt cagtccagca ggtaataccc acgatgccgc ccagattggc ataaatagcg
     5221 cattaagcca caggagatgt tttgccacgt cgattacttc cggctcattg gtgtaaaacg
     5281 atgccaaaaa gctggcgcta gggaccgaga gaacggcaag agcgcacagc ccaatgttgg
     5341 atagccagaa aatatgtttt agctgacgag tggactgcat gatctggcct ttccccagcc
     5401 gtgtaccaac aataatcgtg gcggctgcgc cgagcgaatt accgggcagg ttaatcagcg
     5461 tcgagatgga gaaagctata aagtttccag caatcacttc ggttcccatg cctgcgacaa
     5521 agcgctgggt gatgagttta ccgatattaa acatcacgga ttcgatgctg gcggggatcc
     5581 cgatgctgag tacctcgtag agaatcgaca cggtaaaagg tgcaaagtaa gacctgaagg
     5641 gaatgcgcaa cgcaccgtta aaaccgtgca tcagcgtcag aatcacgagt attgctccga
     5701 tatagcgtga aatggtaatt ccgatgcctg caccgataaa accgagtccc tcccaggaaa
     5761 atgccccgta aatcagtagg ctactgatgg caatgttgag gatattcatc ccaatattga
     5821 tgaccatggg taacttggta ttccccgcgc cccggagcgc gccacagccg actagcgcga
     5881 cagcgacagc aggatatccc cacactgtcc agcgaaggaa cgtgagagcc agcgttttaa
     5941 cctgttcatc ggcctgtcct gcgatcagat cgataatcgc cgaaccagcg aattcaacca
     6001 gagcgaccaa tagaaacgat gataaaacta gcaatgacat cgattgacga gcggcagatc
     6061 gcgcttgctt tctattacgc tgtcctagac tgaaagcaac aacaacggcg gtccccaatg
     6121 cgaccgcagt gaagaacgca atgatgacca tgttgaagct atcagccagg ccgacggccg
     6181 ccatggcctc ttttcccagc caactgacca ggaacgtact gaaaactccc atcaacacga
     6241 cgcaaaggcc ttcaataaag atagggaagg cgagtggtga gatttctctc cagaagagaa
     6301 cgcggttgga gtaacgcttt ttataccagt ctgtatcttt taattttttc atgaaacggt
     6361 cttggagata tctcaagttt cccagtcgat aaggtaaaca gaaccataga atggcccgta
     6421 aatagcatca tttttgtacg gtgcacttat ctctttgatg cgattgcgac agcacggctg
     6481 tttttaaaat agtgttccta tttacagagt atcagtcggc aaatcgatgt ccagcctcga
     6541 ttgctttccc tgcacggaaa gtggttgcac gcgtacatta tttaatttag atttaactta
     6601 attagatttg tctaaactaa tggcggcacg catacaatca gcaatatcat ctttcttgct
     6661 ggctgaacac catgttgagt ggcgcattat gatgggtttc aacggctcga aagaggatca
     6721 cgatcatgcc aacaccactt gcgatttcac ccgcacaggc cagcaaattg ttagatgaag
     6781 gcgcgatact cattgatatt cgccagccgg aagagtacgc ccgcgagcat atcgcacagg
     6841 cgagattgcg cccgctgaat cccacagcag gatatgctct tcctaaagag gatagggaag
     6901 gaaagattat aattttccat tgtttgtctg gtatgcgttc agcacagaat gctgagattc
     6961 tgatgcagtc tgcgtttccg gcaacggcct ttttacttaa tggtggaatg actgcctgga
     7021 aaaaggtggg ttttccaacg gaaatcaata ataaacagcc aattgacatc atgcggcagg
     7081 ttcaaatcgc cgctggtgta cttattctga gtggtgtatt actgggttac agcgtcaata
     7141 gtgctttctt cctgctctct ggatttgtgg gggcggggtt gctgtttgct ggcgttaccg
     7201 gtttttgcgg tatggcaagg ctgttaatga aaatgccgtg gaaccgtggc gccaaacgct
     7261 gattagcgaa aatagtaagc ggagtgttaa ccaataacgt tgagaatagg ggctgtagta
     7321 tggacatgaa gaacattccg tttggtacga ctgattggtc acaaatagaa cccactgagt
     7381 ataaggggga gtcggggatc gcgtattggc gaacacagcg ttttgatcat atccgcgtcc
     7441 gtattgtcga atacacgccg ggctatctgg ctgatcactg gtgctcaaaa gggcatgtcc
     7501 tgctgtgcct tgaaggcgaa cttcatacgg aattagatga tggtcgtgtt tttgtcctca
     7561 aacctggaat gagctatcag gttgcggata acgcggaagc gcatcgttcc tacactgaga
     7621 cgggcgctaa gctgtttgtt gtcgattgat gttatgggct acgtggtgct gcggagacag
     7681 attgtgcagt tgtttcatca ttcaatcgaa ctaacatggc gcacaacgtg gcgaaagcat
     7741 taagtggact gacacatgga gtggcttgat tgctggcgga gtttgtgaaa gaacgatata
     7801 tcacagtgca ctgaagtcag ttagcgatgc cgaaatcttg ctgatgaata atggtgcggg
     7861 atttcggcac aggagcgttc taaattattt cacattttta gctgtttcac tgcggcatct
     7921 atgtctattt catcttctga gaagattaac gttgttccct gaaaggtggt gatcgccagt
     7981 tttttcagcg agcgcatttc accaggttta gtgcttgatt ttggtctgat actactcatc
     8041 agtgccccca cagacagcac cacattttct ttatcaatgt gggtatcggc aggcacttct
     8101 tcgctgtaaa ccacgaaaga cttgagcgac gtgagtttta aacgctcgcc cgcgatatag
     8161 atgtatttac tttccggcac aacttttaca gcataagccg atagaccctt gttattcgta
     8221 gtgggttcga aggtgaccgc cgcatctttc ttaatcagat cagggttggc gactttaatc
     8281 acatgaaaat aacggttatc accgttttca tctttgataa atccaaaacc tttatcttta
     8341 aaccaggttg tgatcgttcc gttcatcgcc attaccgcct gcttaatcgt ttatctactc
     8401 agtttttgca gcgcgcagtg taaaacacat ttcctgcgca gaccatgcct ttgatttaag
     8461 tctggacgat aaatttctgg tatgcgaggg cgcggtgacg atataagcga tagagagtaa
     8521 aatgctgcgt ccagttgtgg tgaaaacgtt aacagggtgg tcggcgacta tctaggataa
     8581 gacagtgctt ttattggctg gctgaacaca aaatatgact gaaaagccct gaaggactgt
     8641 tcagtctagg catttgtaag acgtttatta ccacattaaa tcatctggca ctttaaaatc
     8701 agcatacgga tcttcttcgt cttgttcttc ctgactaagc gcactattta atacaatgct
     8761 gtccgcatct cgctgcatga ttttatcggc tacgatggcg gggataatag cgtattcact
     8821 ctctccgctg ttatcgagaa ccaaacgtgc aatagcgaga cggccactaa tcaactgagc
     8881 ctgagtcagt ttgtccacat ctattttttt aattaaatta ttatctgtga agttaaaacc
     8941 aacattgcct tttgaaacat caatcctatt catttcaata agttgcttaa cctgggcttt
     9001 atattcttta gataacgtcg cttgtttttg ttgttcgctt agctgcttgt cacgctcaag
     9061 ttgcgctttt ttattttctt ctacagcctc tcttgcctca cgagcctgaa cgcgtgattt
     9121 tttagctgtt ctttggactt tggccatttt tttgctggtg actaatccag cttttagcat
     9181 ctgctcttgt aaggtgagtt ttgtcatctt cgtttctaaa ccagttggat aatgtgtggg
     9241 attatacccg taatttttga ggctatacca gattgcagga tttgatcgct gcgtcacttg
     9301 aatttggggg agactgctat ctacagttgg cgttagctgg cctcagaatt ggatacaacg
     9361 ttcagttttg ggcactattc gtccgtgagc agtgccagga tttcttaggt gttatgagtg
     9421 atatgcgatc ataacatcgc tacgttgtat ccttttcaaa actactcatt gccccattga
     9481 ttcagaaaca tcgctatctc atcaatacgt tgttcgtcta taccagcctc gctggccatc
     9541 tctttctgcg catcctcgct gatttcttca ttattcatta agcgggtgat cagcaactga
     9601 aaatagcgag ccagagcttc gcgttctggc tcgctcaccg actttgcgga ttccgtcgaa
     9661 tattcatccg cgatgtcata atatttaagt ggtatttcat tgttcataag tagcccaagg
     9721 gttaaggtct ttgtcagttg ctgcttgcgt catctggccc gaataatatc attcttattc
     9781 gacaagagta attccagtgg caatttcgtt attgaacacg gtggtgaagg tatgaaacac
     9841 ccgtgtagcg actcctgatt ttttcacgaa agatgttggg tttatattgt aaccgattcg
     9901 gtggcttaaa gcgggcagct cagatcccct tctttacaac gtagcatgct tttgaattct
     9961 tttacgcgcg cggcggtttt ctgtgtcagg cactgggaat acagcatgcc atgaaccgat
    10021 ccccctgttg ttgggaaagt ctgaaactca cagtcagcgt cgcgatagga aatccatctt
    10081 ctctgcgctg acttgagcag tgctttgtgt tcttcaataa ctgtccgttt tacgatatct
    10141 tgataaagct tattaagctc atcatccact tttttatacg tctgatccgc gcattgactc
    10201 atatcgagtt gcgtgttggc gttattgcaa tccaaagccg cagcttgcgc cgtgggcagt
    10261 aaaaaaaacc atacaatggc taattttttc attatttatc ctctgtaagc aggagctacg
    10321 tggttttgtt gaataaatca gattttgggt aaacgtgctt atcgaaagat cgcctctgag
    10381 gtaatgtgta cactttccgg catatcggcc tttatcactt tgttcagagt ggactacgat
    10441 ggtcaggttt tttgcaacct gaccatcgta gtccactgtt catcgcgaca tcgccgtgta
    10501 ttatacgctg ccgtagcgta taaggataaa taccatggct atcttgaaag aggttggtgg
    10561 cttaaattaa gtttttcttg atttgttaaa gccagactca caaaccgata gggccggaga
    10621 tagcgcattc ggacagaggc agtcaatatg cgagccatcg ataccgggat gtactgaaag
    10681 acaagggttt acgctgctta atgagcggaa agggttgctg ttacgacaat gcagtaatgg
    10741 aaagcttcta tcacacgctg aaaacggagt tgatgtgtgg caaaacgttt gtcagcagag
    10801 aacaagcgat gaacgcgata ttcgattata ttgaggtgtt ttacaatcgc cgtcgcaagc
    10861 actcgacgct gggttatcaa acgccggtgg attatgaaat ggcggcgtaa ttaggtgggt
    10921 ataatttcag agacagatca atgttgaata gggccagatc gcgcgtttta ccttccagtt
    10981 caagtctgat tcaatccccc agatatgaga tatctgaagc ggtctttttt gtctgatgat
    11041 acggtctttg tttcatactc aaatctcctg ctgtgtggaa gatttgagta tgattgtcct
    11101 ccaagagcga acaacagatg cttaatttgt ggcatgaaag catctcgatt attcgtggct
    11161 attcgcaaag aatttgataa cttgagttcg ccgtcacctt agagagcgat cctactgata
    11221 aaggaataac taatgaaagc aaaggtgttt ttaagtctat tatttttggc aatgtcatct
    11281 aatgtcgctg catttactca attcaaaccg gcggtattaa atgctgctct tttgttcgag
    11341 catgatgcaa ctaccgggaa cgtaaaacac agccttcagt ggatccgaga tgtttccggt
    11401 aaacttcaag ctatgacaga agttaaattt gatcgcagcg gatgctttac taatatcaac
    11461 atggttgata aagcaaatga ccgagagttc catttggtaa acaaagatgg cgtactgacc
    11521 tcttttaaag gtcagcgtat taccggaaaa atcaatgaac gttgcgaaat cactgagctc
    11581 gagaatgaaa agggcaaatt tgtgctcagc tataatgtgc gtgggttgct tgaaacaatt
    11641 gtggacaaag atacgggcga agttgtagag cgatatgaat atcacagtaa ccaattccct
    11701 gtacgcataa ggaactacaa agatcaaaag gataagcgca tattttaccc atccggaagc
    11761 gcgcaattta ttgactcaga gacagtatca aaaagtgggg agttaaccgt ccgggtgaag
    11821 caaagttgtg cttacactgc cgacggtaat gcagataaat gctcgttaat agcctccact
    11881 aatgacgact atcatggctc aatcctcatc tggatttcta accacgaaat agaatatttc
    11941 tgaatctatt aaaaatggcc taaatagcag cgcctaatac cgcataattc gagtttcagg
    12001 gcaagtgaaa gaatccagga tcacttattc aaataaatga ttctgataac tgcgcgcttt
    12061 cttacaacca gtttatgaaa gaattcattc ttattcggcg tgttctcact gagaacagca
    12121 ccgactatat gcactacata ttccacgcgt tttttctggt tcagtttatt gccccatata
    12181 taaatacagc atcagccatt ggcgatgcgt aatcctctgg ctccttccga cgccatcact
    12241 tttcctgttg cggctgtttc tacaaattca ccccaccagc acatcaatat cttgcgttgt
    12301 tccagatagg tggagcggtt atagttttct gtagcatttt tttgccgtga ttgctctgct
    12361 tgcttatgct cctgcggatc aacgtctttg ctaagaagaa gtcgtgcatc ttcgcggagc
    12421 ttacgcgctt cggcaagaga taccgaaggg taagagccaa ggctaatcat tgcacgtttg
    12481 cgagtgaagg gtttgtagta gcgaaaacgc cagagttttg aaccgcttgg agtgacctgt
    12541 aattctaaac cgtctccatc gtagagggtg acggcacggt cagtggcctt ggcgcttttg
    12601 acctcagtat tgttcagggg ctttgtctga cgtgccatat cgctctccaa tcaaatccgc
    12661 aaagctgttt aggcataggg tttaggctac atgttgcgtc gtatgcctat atctatgcct
    12721 aaaaagtgtg gatttcaatg tatcaatatg gagttaagta gacaacagaa aaacagcagg
    12781 cttatgcaac ctactgttta atctgttctt tatagtcttg tctggacttc agtagacaaa
    12841 acgttgggga catttggtcg gcacgagagg atttgaacct ccgacccccg acaccccatg
    12901 tcaccggact gattcgccgt aaacccgcgc cagcactggc ctcagcaccg ttttgtatgt
    12961 atatgcaaac agtgcattcc ctgcaaaatc tacatcatat acatcaatga cttatgtgtc
    13021 gttttaccat taccctgttt taatttcagc gtgaggaaca gtgacccagt ccagatgatt
    13081 ttgagtataa attttcgttg atttggcatc gctgtgcgcc atgcgcgcct gtggatctat
    13141 tccctgcttc tcaaacataa atgcggctag cgcacgtatc tcgtgaaatg ttgggcgctc
    13201 tgctagtgga tattcagacg ccaccccgac agtgtcacgc aagtcagaga atgcccgact
    13261 caaatagtct gggctaacct gagtggggtg attaacctcc tggctgattg gattgctgtt
    13321 tttctcgggg agccggtgca ctacatacgg actggcgatc cggtctctac tgtcatcaat
    13381 gatgcgctta agctcacccc cgatcggtat agcgatgtgc gaggcttcct ttttatgtac
    13441 cttctgtctg tggatgtaca gcacaccatg tattccattt tctggcactt gatgccatag
    13501 acaaccgcac accccttctt tgggttcttt tattgaatat ttgatacgag aaacttcaag
    13561 ccgtgcttgt gttgtttgca atgcaagatc catagccgtt cgtaaccagc ttggcgcaga
    13621 cgctcgaatg cgctgaaaat cctgaaatga aagacggcgg cgttttttgc catccacccg
    13681 ccgcattttc ttgcgagacg cagggttgtc gaacattagc gactcatcaa cagcatagct
    13741 gaaaagcttt ttaagaaagc taattttccg gttttgcacg tttgccgatg cttctgaatg
    13801 gtaatgctgg atatatgcgt taacgtgctc cagttctata tcgcatgata caatatcgca
    13861 gaaaaattct ttcacgcgga gagcatcatt attccagtca gcgagcgtat taggggatgg
    13921 tttttcgtca gtgatcgcac gactcataat attatcgaca tggttggaga aagggaggtt
    13981 ttctcccgat ctcccgcctg actccctgat cagggagttg attgatacgg ctgattccgg
    14041 gcgcatttga tagttatatt cacgtgctat tgcaatcgct attgctcgat ctttccctat
    14101 actctttttc ttccctgtaa ttaacgtgaa tctgtaaacg cctttacttt tatcaaaaaa
    14161 aagataatcg ggcagcgatc gatattcgcg ttttcgtggg cgagcagcca tttcattact
    14221 cactaattaa ctgcataaca gcctgggaaa cggtggagtc aacaccccat ttttcagatg
    14281 aacagaccca tgcagagcca tcaacgatgc ggccccgcaa gaggccgttt tcaatccatc
    14341 gctttatagt tctggtatct ggctctgagc caacttcaaa ctcccgttgc ccccatttac
    14401 ttgctttcat cagcttgctc atgggtcatt tctccacacc gattaattac cagcctgtgc
    14461 actcaggcgt tttcacgcaa ccagatgcaa actggcccgt cttctgtatc gtgaatagaa
    14521 ccaacaaacc aaccatcacc ggctggtggt gttgggttcc agtcggacac attaaggtcg
    14581 ccagcttcaa agtagcgatc tctaatagca tcagcttctg ttgctgggtc ggattccaac
    14641 tctgtaatcc cccaatccat gccgttgttc tgcatccatt catcaaactc aacagtagga
    14701 atggactctc gatctgcgca aaactcttcg tatttcgggt gcgtccaaaa accgtattcg
    14761 tcccgttcaa cgggtaatgc tgtaattgtt gatttcatgt cattcaccat ttttcacaaa
    14821 aataacccaa tgagttttgt cattttttcc tgttcgctgg gtgatgatcg gtcgctcatt
    14881 tatcagcgat aaaatctggc tggtgggtat ctgagtttca ttccacttga aaatcaatac
    14941 accgagcggg cgcaaaactc ggaatgcctc caagaatcct gcgcgtaaat catcacgcca
    15001 cgtttgcggg ttaagcacgc cgtatttttt ccgcatccat ccctctggac ccgcccgttc
    15061 aagatgagga ggatcgaata caacgacagg gaaagactcg tcagcgaatg gaagctggcg
    15121 gaaatcagca atgatgtccg gcgaaatcac aaggctgcgc ccatcacaca atgtatgttt
    15181 ctcgtcccga atatctataa acacagctcg tgggtcgctc ttgtcatgcc agaacatgcg
    15241 actgccgcag cacatatcta aaatcgtcgc attagtcata cttcaccgtc ctggcagtct
    15301 tgctggtgtc cgttatcacc aagaacccag cgcagtgcat ctgcataatc gccagtagcg
    15361 ttttcgagag cttttgtgat ttcctttcgg cttttgagtt tcggtttcgc gttgcccaaa
    15421 acctcacgct gacgacgaac gcgctcatgc ccagacacac cgctggtggc ctgaactagc
    15481 tctttgactt tttcgcgctg atcatccggt gggaggtttg ccaattgcct agcgtggccg
    15541 gtatttattt gcccagactc gacagcatcc tgaaccgctt gcgtgcaatc cagcagggcg
    15601 agtgttgctg taaccgtctg agcgctgcat ccaaaataaa gagccagatc gctttcgtcg
    15661 tagctgagtg tcagcattga cgccatcttc ttggctcgac caagcggtgt atctggtata
    15721 tgaatttcat tggcgctgat tgcagcttct ttcgcacgat gcaccgagcc aatacgaaca
    15781 actgcgggaa ccatcagaca aggttttccc tgatcgacta atcgccggtt cgcttcacga
    15841 gcgtgcttaa cgcgctggcg accgtcaact acatacaccg ttccggtttc tctgtctttc
    15901 cagataacta tcggctcgat aaccccctga tccatgatgt ttaggaccat agcctcgctc
    15961 agtgccaaat agatacgttc gtcataaagc gggtgagatg ggtcatctgt catatataag
    16021 ttttctggag cgaaattgag aacgttagtt ttcccttgag ccccataagc atctttcgag
    16081 tttttagcca cgttgcaccc ccgccttaag ctgtgcttct aattcgcaga tgactgagcg
    16141 gaggtgttcg ttatctgcat gcaggtgatt aacgtggtca agaacctcag cagataacgg
    16201 ttttctacca ggcagtttca gtccttgctg gatattacgc agcatcaatg aatgcatggc
    16261 gttctctata atgagagcat catcctctgg tggccccaaa tacactggct cgccttcata
    16321 atcgacagct aaatactgcc cagcagtcag atcgtgaaag cgatgaatga actgctgctt
    16381 agcctcaacc ggtgacatgg ggacaataat ccgatttgat ggcgtaatac cctcaagaat
    16441 cggccattcg ccagaattgg catgcagcaa cgcttctttc tctgttgcca gcataaccag
    16501 atcggcgtgt tttacttcag ggctggtttt cagaggcaga tcgaatttca tccgcaccaa
    16561 ctgttcaata cgtgtttcaa tggatttgta gtctggcagc aggtgcttca gcggcgacat
    16621 catgtcgttc acatatgctt cgtgtgcgtc atgcatgagc gcttccagag caaatttctg
    16681 cggaacgata tagcttgccc caacagagtg ttgagcaacg gaatacggcc agtttgtatg
    16741 tccgcataac cggttgatct ggctcagtga atgcgcgata tccagcagac agatactgtc
    16801 taaatttgga tcggcataat taaaatgccg ccccgtatag gttgaaatcc agctcattat
    16861 tcaccagcct tattcagttt ttctgtcaga tctgcaacac aatcccgcgc cgcttgtttg
    16921 tacgcctcag ccgcatcacc ggaatagctt tcatcaacag cagattcaaa ttcatctaga
    16981 gtgtcccaga agcagcctgc ggcgattcgg aaattcccct gaacccaggc ggcgaagatg
    17041 gttcggctag agttgccgca attctcgcgg taagtgacgt tatcaaaacg ctgcggatcg
    17101 agataaagcg agtcgcaggt gaagttctca ggcagactgg tgatgccggt accttccagg
    17161 tcgaggtaac cgccgacgct caggttctca ggcagactgg tgatgccggt accttccagg
    17221 tcgaggtaac cgccgacgct caggttctca ggcagactgg tgatgccggt accttccagg
    17281 tcgaggtaac cgccgacgct caggttctca ggcagactgg tgatgccggt accttccagg
    17341 tcgaggtaac cgccgacgct caggttctca ggcagactgg tgatgccggt acctctcagg
    17401 tagagggaac cgccgacgct caggttctca ggcagactgg tgatgccggt acctctcagg
    17461 tagagggaac cgccgacgct caggttctca ggcagactgg tgatgccggt acctctcagg
    17521 tagagggaac cgccgacgct caggttctca ggcagactgg tgatgccggt accttccagg
    17581 tcgaggtaac cgccgacgct caggttctca ggcagactgg tgatatcagt acgtcccagc
    17641 agagacagat cgccttcaat tacaatagcg gcattatcat taacaacatg gttaattttt
    17701 ttctttttca aaacatctac aaaattagac atttagattt ctccacaccg gtttttaggt
    17761 tgagttaatc cctcgccgca aggcgattaa tttgcacatt tgggattaat taatgggttg
    17821 ccccagaact tctatttctc tacacacaaa ggtggatgcc ggagttaaaa aacaaataaa
    17881 ccgattcatc atttcaattt aaatgaatcc ggcatccgcc tttatatgca gtaaaaaagt
    17941 gcggtgaccc gagaacccct ggtgtggcat aaaccagacc accgcaaaga ctacacacag
    18001 caatttcaca gctatcacgg tcctacgtga ttttgtaggg cgctcggagt cgaaccgagt
    18061 gtagggtagg gaacccaaca atcacctgat caccacaacg gaaagagcac tatctccggt
    18121 tctctcgcca gcctgcaaag cagcagccgt cccctaaatg ctcttacctg ttgtgtacct
    18181 gatttacttc accacctcag gcggcagtgg tatcttggga gttaccacac aaccaagaag
    18241 gaacttacat gcttaaatca cacctgattg ctaaatgcct ttttcagtgc ggcatgatta
    18301 gcgatattca atctggtgaa tctgctgtag aaagtatctt caacgaatac ttccctgacg
    18361 gcagtttcag caaatggaac actcaactat ctgataacgt cgctgagcat tttttgcata
    18421 tatcacgcgg ctccagcact atccgcgtcg attcgtttat caaagacctt tgggatcttt
    18481 aattggtaga gaaccaagtg tttcaaacaa gccgtgcgta atggttttac cgcttcgccc
    18541 tgcctctttt tcaagggcaa ccttgtccat tattgcctcg gtcagagcct gcataaaact
    18601 gatgtaatca gccgctacag cactatcggt ttgcagtgac gccaacagca caccattcac
    18661 attgatttga atcaaacgcc ctgacatgct catcactacc tctctgtgcc tgttcgctgt
    18721 tgatggaatt aatatagcgt aacgcgaaat tatacgtcaa gctgaattta gcgaaacgca
    18781 aattagacgc gaaacgctaa atcgcagaca taaaaaatcc tgccaatggc aggattagtt
    18841 agataagtcg tcaagttact ggctcaccat tagaccaaac cagcttaagc cttgtttttc
    18901 cttggctctt gccgagatcc tttttccgtc aaccagcgcc ttgctttgga ctcaagagag
    18961 tcagcgtaag ctcgagcatc gctatcaacc cattcgggta ttttatcgtt actgtgacgc
    19021 agaatatatc gaactaccgc ttgctgttca gggagggcgt gtgcaaatag ttcgtttata
    19081 tctacaccaa gagactgttc atttggagtg ggggacgaat gatcaatatc gagccagcct
    19141 acaggttttc ccgccgcctc ctctaagcgc ctagctgttc ccttgcgcat gccgcgtcgc
    19201 ttgcccgttt tagagtcttt cgctcccttc ttgagattgg tgaattgagc gggtgacatg
    19261 ccaacacgac tagcggcctc tgctgggccg cctaactcca cctctaagag gcgcatgttc
    19321 tcacgtctga tttcatcaat atctttcatg tctgaattac atagcaaaac gcaaaagtgg
    19381 tatatgcgcg taacgcttaa tttcttgttt gtaatttcgc gttacgctat attcctgtga
    19441 ttccatttaa taaagcgagc atttatgaac ctgaaaattt ttacaggcca acgtcgggga
    19501 ttagcaactt tgcttggtaa ggagttaggc gtaaacgctt cactcatatc gcagtgggct
    19561 aatggagata gacaagtccc agctgaacgc tgcccagaaa tcgaaaaagc tacagatggc
    19621 aaagtcacct gcgaagagct tcgtccagat gttgactggg catatctacg cagcactgag
    19681 cgaaaccaaa atcagtaaac gccactttct tgccgcattt ttacgacaaa gcagggcagg
    19741 gcgaaaccac aagaaaaggt aactcactgt ggacaataaa aactttaccg ctccagcgga
    19801 cataacagca gccatgcaca agttgatcac cgagttcgct ggtggctacg aagcgatggc
    19861 tcagcaactg gcgcatgacg gcacatacaa cgcgctgagt aatcgcgttc ggcaggtggg
    19921 cggacaaatg gtcccattcg gtatggccat tcagatggag gcaatttcaa gtaggacgga
    19981 tatcactcag gcgatgtgta agcgtgctgg tggtgtgttt gtgaagctgc cagacgttga
    20041 gcaaacagac aacgaagagt tgctggtcaa gttcaacgaa ctactggcct cgcttggggc
    20101 atttgctgcg gcacacaacg aatttacggc agatggtgtg ctggatcggg atgaaaccaa
    20161 acgcatgcga gcgaagggct atcgggttca gagcctggtc gcggaaatca tggtcgtgac
    20221 agagatgttg tttggagagg gtgacgccag cagtgtgcag ccgctggcgt cgggtgcgtg
    20281 taattaatcg gtgtagagaa actaaacgca tgaacatatt acagcaaaaa acaggattac
    20341 cacaatttcg ttgcctgcca ttgattggcg gcgataaacc cgtttcgttt cggtatgagc
    20401 ggatgataaa ggggcgctgg ataccctgca accacgggag agtgaacggc attgtgggtg
    20461 tgattaaccg cagggggcag gcatgggcga acaaatcgca gaacttgatc ggcgttaccg
    20521 cgatcagtac ggaaaaatcg tccatgtcat cggatacgac cgtcagaacg agcgcgtcat
    20581 tttcatgcga gaaggctatg agcatgagtg cgtcagcccc ttatggcagt tccaagcaaa
    20641 attcacgagg gtgtcatgag cgttaagttg tctgcatttg tctgggacgg ttgcgcatcg
    20701 tctggcatga aattggcatc agtggccatc atggcacgcc tggctgattt ctcgtcagat
    20761 gacggcgttt gctggccttc aatagaaact atcgcgcgtc aactgggtgc gggaccaagc
    20821 acggttcgca cgacaatagc taggctggag aaggacggct ggcttactcg cacccagcga
    20881 aggaagggca atcgcaacgc atcgaacatg taccaactga acgttgcgaa gctgtatgcc
    20941 gctgcccaat ctcacctgtc agattctgac ccgtcaaaat ctgacacatc aaattctgac
    21001 gcatcaaaat ttgacccgtc aaaatcgagc aaaaaaggcg gttttcaccc tccagaatct
    21061 ggcggggatc cgtcagtaaa ttcaaaacat gatccatcag ataaaaagac tccttgtccg
    21121 cctgctgagc agccggaccc tgaagtcgat ttaactgatt ctgctaagtc ggttctgtcc
    21181 cacctgaatc aggttacagg ctcccgttat caggttagta aaacctctct tgaaaatatc
    21241 cgtgctcgca tcggtgaggg attcaccgtg gacgaacttt gcctgaccgt cgattacctc
    21301 aacgccaagt ggggcgcaga tctgaacatg gctgaatact tgcgcccagt tacgctgttc
    21361 cagccaacga aattccctgg ctatctggaa ggtgctcgta agtgggatgt cgctggtcgt
    21421 cctgtacagc gtgacgggaa gtggttcact caggaagggc aatcactgtc agctgatcac
    21481 accgaacgtg atgcggcata ccgccgattc atcggcagcg cattaccaac caacaacccc
    21541 agccagattg aaactcaggt gcgtgctgag gccagtaaag ccgggttgaa atcgtcaaaa
    21601 cctgaatttg caatgagtcg ctggaacagc atctggaaag acgttgctca gcgccagctg
    21661 ggagggaagg ccgcatgatt ctggacgaca tcgagttagc gaagcaactc gaagaaaaac
    21721 agctttggcg tcgtgccgct cggcagtggc tgacagtaat ggatcggaca aaaggcacga
    21781 cagagcgcgg gctggtagca actcgtcgat caatttgtct gggtcgtgct cgtatgacta
    21841 cgcagcaata cagcggtgtt cgtgtgatga cagtagcggg aggcgtactc aatgactgac
    21901 aagaaagcca tccaagttgt tagtttttcc ggcggtcgca cttcaggtca cttagttcac
    21961 ctaatggaac agcgaagaat tgctggtgaa gatgtgcgtt acatattcac tgataccggt
    22021 gctgagcatt ccaaaacgta tgaattcatc cgtaatatcg ttaagcactg gggtatcgat
    22081 ctgatttgct tgcggttagt aatcaatcct gagcttggaa agggcaatag ctacaaagta
    22141 gttagcgttg atgagattgg tcccgacctt cagccattcc gggatgcttg ctcgaaatac
    22201 ggcacacctt atgtcggtgg tcgattctgt actcggacaa tgaagatcga gccgttccat
    22261 cggtattgca aagaccattt tcctgagcat gagaaatggt tgggtatccg tatcgacgag
    22321 cctaagcggt tgacgcctaa agagggtgtc cattacctgg ctgacatcag cgatatggag
    22381 aaaaaagaca ttcttgcttg gtggaagcag cagcctttcg atctggactt acctgaacat
    22441 ctgggcaact gcgtattttg cattgaaaaa gggattaata agattgctct cgccgcccgc
    22501 gacgagccgc agctcgccgc tgaattctgg caacttatta cagatccttc tgttcgcgtt
    22561 gtcgatagac gccagcaggc caataaaatc atgtacaggg gtaatcactc gctggaatcg
    22621 gttatcgcgc tgtatgcaga caaaagtcgt gaagatattg ctgccacaat tcggggtaat
    22681 ggcggttatg agtcaggctc atgcaccgag tcatgcgaag cctttgcatg tggttttgat
    22741 ggtgaagatc tgctggttga tgaaatagaa accgctccgg caaacgaata cgtagccagc
    22801 ctgaatgcat acaaagcagc gccagcccat gagttaaaaa aagttggcga tcagttgtgc
    22861 acgccggatc cacttttctg ggggattaat gccatgtttg gcccactggt attggacctg
    22921 ttcagcgacg gcgaaaactc gaagtgtgaa gcctattaca ccgccgaaga caatgctctg
    22981 gcgcaagact ggtcgtcgtg tctggctgaa ctgaacggtg ctgcattcgg aaacccgccg
    23041 tattcccgcg caaagcagca cgaaggccaa tatatcaccg gcatgcgcca catcatcgat
    23101 catgctatgg aaatgcgtga acttggcggg cgctatgtat tcctcatcaa atcagctaca
    23161 gccgaagttt ggtggcctga agaggccgat cacatcgcat ttatccgggg gcgcatcagc
    23221 ttcgatctac cgacttggtt caagccaaaa gatgccacac agatagcaag cagtgccggt
    23281 tttggggttg caatcgcggt atttgataag caatggcgcg gaccagcaag tgcctacatc
    23341 gaatgtgatc ggctgtatgc acagggtgaa gcattcatgg cacagatccg cagagaagcg
    23401 gaacggatga cgaggagggc agcagcatga tcaaaggccc tctcatcagc agtcagcgct
    23461 atcttgatcg tgagaaggtc gcggacaagg cttatcggtt taccaaattt tacgttgagg
    23521 tctatccggt cgttctccat gggaatcaat acaccctaat tatggacggt caccataact
    23581 atgcagcctc aagactggca ggtgtagagc ctacctatcg cccaatccgt aagaaactgg
    23641 cgaagatatt tagcggaatg acgcaacggg aaattgaagt cttcctgatc aacaacctta
    23701 ctgacagcca cctgtattac gtagaaagcg gtgaggttgt tgaagaattg actatgccgg
    23761 aggtgagggc gtgaaattaa ctcttccgtt cccgccgagc gtaaatatgt actggcgaca
    23821 taccatgcgt gggacaaaga taagtgctgg tggccgcacc tttcgtgcta atgccatcgc
    23881 cagcatttac gaaacgttac gccatcgacc taagcctatc gccacttcgg tggaggttca
    23941 tgtcgttctg taccccccaa cccgacaatc ccgcgatcta gataattacc aaaaggctct
    24001 atttgacgct ctgacgcatg ctggtgtgtg ggaagacgac agccaaatta agcgcatgct
    24061 ggtggaatgg ggaccagtaa cgaaaggtgg caaagcggag atagtgatca gtgattttca
    24121 ggcaggtact gaatgagggc gttattacgt gctgttactg tgcctgagct gggacaagtg
    24181 atattacgcc ctggtaaaga gttactttca ttgtttactg gtcgtgtgct ggtggttagt
    24241 gagccggatg aacttaaagg acttccgtct ggtttgctgc caagtcaaga gcaacagctc
    24301 gccaatgatc cacgctggcg ctcattcctc acgaacgaac gtgtgataaa caccgctggt
    24361 ggcactgata gccttattaa ttggctaaat caggctatgg tctgccagcg ggaaagtgaa
    24421 taccactcac agcatatgac caccctcaaa tacggtaata gcgccattcg cctgtgttgg
    24481 cactgcgata atcttgtgcg cgatcacgaa acgccagttc tgaacgagat tgccgatcgc
    24541 aatgctgctg aatgggtaat ccaccaagcg agaacatggt taacgctgcc agaaggtcac
    24601 caggttaccg ctcatgaact tagttggtgg tcagtagtga agggtgtttc tgaccttctg
    24661 ccagcccatg caatacgcat cagcctgcgt atgcccgcac cagaggataa gcccggccca
    24721 cagcgggaat gtgacatcga atggacaaca ccagtacggg acatcattga tgagcgcata
    24781 gagcgggtta agcctgtaat ccgtctggtt gaggatgctg agccaccagc gggttttatg
    24841 ttacgaccga aattacagcg catggaatgc gagaagtaca ccaggtgggt gaagtcccag
    24901 ccctgtgcat gctgtggcgc tcctgccgat gatccgcacc atgtgatcgg gtacggactc
    24961 ggcgggatgg gtacaaaaac gcatgacctg tttgttattc ccctgtgccg ccgtcatcac
    25021 gacgaactgc acagggacgt agcagcatgg gaggcagagt acggcagtca gttactttta
    25081 ctggtccaga ccctaaaccg tgcatttggg atcggggcta tttcaatcgg gaaactaaaa
    25141 ggtgtagaga atgagtgata tgtatgagcg tttagatcgc tggggtgcgt gggctgcgtc
    25201 tgagcaaagt ggtgtggact ggcaacctat agcagccggc tttaaaggac ttatccctca
    25261 cggtaaaaag tcacgttctc aatgttccga cgacgaaggg ctgatgatcg atggttgtgt
    25321 tgctcggttg agaaagtata agcctgaaga atatgatcta gttgtcgcac attttgtttt
    25381 aggaatttcc ctacgggcga tagccaaaaa gcgaaagtgt tccgatggaa ccattagaaa
    25441 agagatgcaa acagccgaag ggttcattgg tggttgtttg gcaatgctaa attgagcatg
    25501 tgacattaat tggtcttagt aggtaaggcc gagcaatcat tcagtatcaa cagtgtctgt
    25561 gggcgatgat gcatcggcaa cctgcactgt ttttcctata tttactaatt gtctaacggt
    25621 tttttctcta tccttcagta gttccactct gaatgcagga gatatgttag gacttagcaa
    25681 ctgcttatct atgtttttca gatctcgctc agatctatta cgtaatgaag cttctgctgg
    25741 cgtttcaagc ccatgcctgt ttataaccca attcataaaa taagttataa tcgcagaaag
    25801 gataggagct aaggcatata aagcaggtcg ccatggatcg tcagcgtctg ggagcagtgg
    25861 tggaactaag gtagtcaaaa gcgctcctaa ccctccggtt gccgcgctat ttttcgctga
    25921 gatgaatggt tttttttcct caatcattgt ttagcctttg attgtgctaa ggcgtcgtct
    25981 aagatgcgaa ccaggcttcg cccatccttg cggtcgagtc ttaagaagaa cgttcgctta
    26041 gttttttcct cttcgtcaat caatgttatt tctaacttgc gagtaggaaa aatcttgcgc
    26101 cagagcaggc taaatgaggc atatgcgaag cgatagaatg tagggaggca aagaatgccc
    26161 cctatccacc caatcaattg caaaacctgc tctgctaaca tatgacctct atatgattct
    26221 tctactcgca tcagccctgt gcctgatgac tttctttatg atgtattttt ctgtcacatt
    26281 ccgtgcagta aatgttttag ttatttcaag ggttacagag aaaaggtcgt cgcttgagat
    26341 cgcgccctcc gcttgtcgaa ctttcgcaag aaactcaaag tcgttaagaa ggacagaatg
    26401 ttcctcattg ttatactcca ttcgccaccc cttctcactc tgaaagttga cctgggtaaa
    26461 cttaacgtta acttcgcgga tttctatttc tttttgtagc agagttcccc gaggaagtgg
    26521 tttaacttct tcagtctgcc cgccttctag tcgaatcacc acttcatcat tttcatttaa
    26581 aattttgaag acaggatcct ctttaccttc tagtggagtt tgaatcactg atatcagcgc
    26641 atcacgaatt gtaggatctg tcactaaagc tgctacaggc gtggggcatt caatttcttc
    26701 accctctagt tccagtatgg tggtttgagt tccagctttt cgtgtcatag tgatgaccct
    26761 tgagctaccc agttgccgga ttaaggagag ggcgctagca ccaccagcag caccaacagc
    26821 accagttatc cctatagttc ttagaacatc gattgcatct ggaagcaatt gaataattgt
    26881 gtatgcaatg ccaagggaac ccgcttcagc agggttggtt actaacacct ttaccgactt
    26941 ctgcccatca tttaaaaggt catcggcttt agtgattagc tttgtcatag acaaaataga
    27001 attaccaaga gtttcagcat caatagcatg atgggatagc tcattatcgt cagcatcata
    27061 aaacacttta aacgaagtag tttgttccat ttctaaccct tatcattttc gttataaaaa
    27121 cacatgcaat ccatatagtt agcattggaa ctgaatttgt ttggttgctg tatgtatttt
    27181 gtggttttta aaatacatct cttcatatta aaaatcatta acgcgtacgc aaaaacttag
    27241 ttattgtgat aagtgtggtc acatggcacg aaagcttacc cctgttgtta tcttttggtt
    27301 taagcataaa aaaagccact attgcagtag tggctttggg tagaaatgcg acgatcttag
    27361 tttggtgttg aacgacgatg gggtttaact ttcgtgccat ctgctttcgt gtagccagga
    27421 acaactacga ttttcttgtt ctggactcca cctttggatg ttttggtctt agccaaaata
    27481 atcacctctc agtaatatat ggaagtgcag cgggatgctg cgtacgtttg acatccttgt
    27541 taagtcttgc tcctatgcca actacattat gttgtgttgt tttttatttc aatgacacaa
    27601 tatgtatgat aattgatgtg cgtcaaagac agttattcaa gaccataagc tgcgctaatt
    27661 catagccttt ttatttcttg taaatcactt gtaccgcccg cgtttttcag cgcaaataaa
    27721 gaagtaaatc ggtttaataa gttgtgataa ttcctctatg tacactttac ttgtccgagt
    27781 gacacataaa ctgcgcatat caaagaggga tacacatgaa actgaacttc atcaaactgc
    27841 ttccagccct gttacttggg gcgtgctcaa cgcatcaacc gcaagaaaca gccgaacagc
    27901 ctcagactga aatcacagcg cctgcaccag ctcgtcaggc tgctgttgca tctgtcgcgg
    27961 cagtgtcgaa agataactgt ctcgtgggtt gcccggtagg cggcagttcc cagactctgg
    28021 tccgtgatgc atatacgctg aataacaacg cctctactcg tttcgcgaac tgggtagcgt
    28081 ataaaatgac gtcagcaact caggcaagcg gccgttcacg cacatggcgt caagaccctg
    28141 atttgcctgc tgctgatacg ctggcaccag cagcatacac tggcgctaat gcggccattg
    28201 ctgttgaccg aggtcaccag gctccattgg ctgggctcgg gggctcgtca gactggcagt
    28261 ctttaaatta tttatcgaac atcacgccgc agaaggcgga tttaaaccag ggcgcgtggg
    28321 tgcgcttaga agacaaggaa cgggctttgt cgaatagtaa aactgtctac acagtcactg
    28381 gcccactgtt tgagcgcaat attgctacat tacctaatgc gccagcagtt caaatcccta
    28441 gcggttactg gaaaatcttg tttactggtt caagccctgc ggatgggaaa tacgcggcgt
    28501 tcatcatgga tcaaaacaca ccacgcaacg cgaatttctg taatttccaa gtgacggtta
    28561 gtcaaatcga acagaagaca ggcttaaaca tctggtcatc gcttcctgcg aatgtagcca
    28621 acacaatcaa agcgcagaaa ggttcgctcg gtagcgacct cggctgttaa taccgctcag
    28681 tagtaactaa tcaataaatc acatagcccg ctgtaagtaa gcggcgggct ttctttaccc
    28741 ttaaatcaca cagcgccgac catcagggag gtggagacat gaaaatgcaa aacaatattc
    28801 acacctgggc tgacctatgg gagctattcc gcgcttggtg gaatggtgat gttcctatgg
    28861 gaggcgtact gctctcaatc gtagtgactg gtctacgcgt ggcgtataca ggcggcggat
    28921 ggcgaaaaat gatgttggaa gctgcgttat gcggtgctct cacactgaca gtggtttccg
    28981 ctctggaata ttatgacctg ccgaagagcc tcacgatggc gatcggtggg agtatcggat
    29041 tcattggcgt tgagcagatt cgagctgtag cgctacggtt tctgggtaat cgttttgggg
    29101 gtggcaatgc agatcagcgc taacggtatc aacctcatta aacagtttga gagctgtgaa
    29161 ctgacggcct atcaagatgt cgtgggtgtg tggacaatcg gctatggctg gacgcagtcg
    29221 gttgatggaa aacccattcg tcgcggtatg acgataggcg cagccactgc tgatcggcta
    29281 ctaaaaactg gcgttgtgca gtacgagcag gcggtgaatc aactggtgcg agtccctgtc
    29341 aatcagaatc agttcgatgc gctagtgtcg ttcgcgtaca acctgggtat tcgctcttta
    29401 tcaacatcca ctctgctgaa aaagctgaat gccggtgatt atgctggcgc tgctgacgag
    29461 ttcccgcgtt ggaataaagc tggcgggaaa gttctgactg gactcactcg gcggcgcgag
    29521 gcggagcgtg ctctgttttt gtcgtgaaca tcgtcacgaa ttggaaaata gccactggca
    29581 cgctggtggt tggaatcatt actggcggcg cattctgctg gtggatcaca tcaacgagtt
    29641 atgacgctga tatagcgaca ctgaaaactg aacatgctct ggtggtgaaa tccgtatcag
    29701 ataaagcggc agaagatagt gaagcagctc gcagtcgtga gcatggtttt cagcagcaaa
    29761 tagcagcgct ggacactgag cacacaaagg aacgggaaga tgcgaaacgt gaaaatgagc
    29821 gtctgcgtaa tgatattgtc agcggcaagc gtcgcgtgca gttcgccagt gcagcccttg
    29881 caacctgtga gcaatcagcg ggagcggtac gcagcgccgg cagcatgggc aatgcaaccg
    29941 ccgtcaaact ctctgcaact gctggcagaa acattctcga tatcagagcc ggaataaagg
    30001 acgatcaggc aaagctggtt taccttcacg ggtatattcg agcgctacag cagcagggcg
    30061 tcatcgccaa ctaattaacg gcttgcaagc gtacgtgcgg gaacagtaac ttgaataaaa
    30121 ttattaataa tcatagccct gtaacaagag aacattgctt gacgacccac cagtcacggg
    30181 ccacaagcac ccaagaacct ggtgccaagg gaagcccgcg cttgttaatc tgctgaaaca
    30241 tctcgtattc ggtgtcagac actttctgtt ggaagaaaat cgcatagtca atggcgaggt
    30301 cacttggggt agggttatag ccatcaggac tcatcttgga ggccattgaa acataacgac
    30361 tcagcgcaag cttcataacc tgaactgtat tgtcagccat cattatattg gcgatatacg
    30421 cacattggtt gattgattgc acttgctgat actcagccat actcacgcct tcagcattca
    30481 ctgcgccaga agaagcgatg ataagtggca cggcggttaa aaaattagtt ttcacaaaag
    30541 agacctcagc attagggagg gttaagttag cattcgcttc atgatcgtgg aagtgtgtat
    30601 gacggatgac ggatgacgga tgacggatga cggatgaagg ttgtgccttg atctgattcg
    30661 ttatgtttag gcaactgcgc ggccactgcg gagtgtggca agtattcact gagtgcctgt
    30721 gataatgtcg aaatgtggtg aatgcgcaaa ctggtgcggt attgtgggaa gttacgcggt
    30781 tagtagcata aggcacgttt actattgtat ttgatcttgg ttaataagct tatctttgga
    30841 ttttccgata ctagttcttc atttcaatgg agaaatagtg aatgtcaaaa aaaaccacaa
    30901 ttttatacta tgtgatggtc accttcgata taactgtcgg cgataaatcg aacatctata
    30961 gtgaggtttc agatctactt gaaaaaaatg gacttactaa ggattgcgat ggaaatgagc
    31021 ttcccgaaaa cgtttacttt ggaacaagaa aagctgaaat cacttacgaa ggtgaggtgc
    31081 ttacccagga agatataaaa gccagagggg taaggataac taagcgttat tatgatctct
    31141 tgaaggagtt ttttaacgag aaaaaaatca aatacaagat attcattact gctagccgta
    31201 aatcgaccac agccatccga tatacaattt ctaaaaaata acacaagctg ccaatgggcg
    31261 ttttttccac aatcacagcc ccagcatctg ctggggcttt ttgtttacac aatcgtttac
    31321 ggcgaggtat gaacaatgag ctatcaacga agctggttta tctgcataag tacatcagat
    31381 tgctacagat gcaggggtgc ttgaaaagca accaccccta atggcagagg ataattaata
    31441 ggaaattcga ccaactgact ttaaagattt caagacggag gcagtgattt ctaaaaacag
    31501 tgaactgtca ttgtaatcgt agctaggatt aggcttgtat tcgtcaacgt aaaccaaggc
    31561 gttcttcccc aaaaaaaagc aggtagtttc tttgaggcaa tccccatcat catactcacc
    31621 agtgaatttc aaaagaggaa catcgttaat gacaattaat cgctctttaa atgttatttc
    31681 tatgtcatag atatctattt ttagcgtgat taaaccatca gtgttttggt ctagtgaaaa
    31741 tgctgacttt tgaaaatcac ttgcgttcat tgaatcaatc agttcttttt ttaaattaga
    31801 tgcaacctca tctaattttt tcttatgctc cacacatcga attacctttc taacatctaa
    31861 atatttttcg tacatgtgtt tatcctaaat tgttagatga aatttgatta taacaatagc
    31921 tattgttgag agtgtgacca tgccagcaag aataccccgc gcatgtcgta agcacggctg
    31981 cggaagcaca acaacagacc gctcaggtta ctgtgagcaa caccgcaaca ctggatggga
    32041 atcccatcag cagggtaaga accggcacga acgtggttac ggtaatgatt ggacaatcag
    32101 acgcgcacgc atactgcaac gcgataatca tctatgtcag gaatgtctac gtaatggtag
    32161 agcagtagcg gctaagacgg ttgatcatat caaagccaag gcgcatgggg gaacagatga
    32221 tgattcaaac cttgaaagcc tgtgctggcc gtgtcatcgc accaaaaccg gacgcgaacg
    32281 gctcaagtga tagcgattct catcagaggg gagggggagg gtaaatctct acatccctgc
    32341 gccctaagta ccgccgccta ggtcagattt ttacgcgcct gaaataagga attttttttc
    32401 gacaattttt aacatttgga gcctctcatg ggaacctcga ttcgggcgtc cggtgggggg
    32461 agaaaacaga aggtcgggac taaaaataaa agcagtctga ccagaattgc acctccccgg
    32521 aactaatgag cgatacagca attcggatgt ggaaaactca gagcaaaatc ctgatcgagc
    32581 gaggtacgtt tgaacttgaa gatgctccgc tattgctggc gtactgcaat tcctttcatt
    32641 taatgattac agcggaaaag gtcattacta agcaggccga gattgatttg gaaaatatgg
    32701 ggctcgctga tcttggcgga actggtggat taaagaaaca cccggcagta gctgttcgta
    32761 atgattgtgt ttcacaactt gcccgcctgg gttctttgct tggccttgac ccactcagcc
    32821 gtatcagaat gattggcggc acggaaggcg atgaagaaga gaatgaattc gatgagtttt
    32881 aattatggcc tcatacccga acgtgaatgc cgcccagcaa tacgctcggg aggtgattag
    32941 cggaaaaata ccagcctgta aatatgtgat tgcagcatgc caacgccatt ttaatgatat
    33001 tgaaaaagca aaaaataaaa actggccgta ccgctttgac agagacaagg ctgaacgggc
    33061 atgccgattt atccagtgtt taccgcacac aagcggtaag tgggcaaagc aaaaattaaa
    33121 gatcaccctg gagccttggc agcagtttat tttctgcatg gtgttcggtt gggttaagaa
    33181 aaaaaacaag atgcgccggt ttcgtgaggc gtatacagag gttccccgta aaaacggtaa
    33241 atccctgttt gctgctggcg tcggtacgtt tatgttttgc gccgatgatg aatacggtgc
    33301 cgaagtgtat tgcggggcaa ctactgagcg gcaggcgtgg aaggttttcc gtcccgcgtt
    33361 actgatggct cagaaactcc caaatttacg taaacggttt cagatcaaac cgtgggcaaa
    33421 aaaaatgacc cgcccagacg gatcggtgtt tgaaccgatt atcggtgatc cgggtgatgg
    33481 tgactctcca tcgtgcgcat tgattgacga atatcacgag catgcgacgg acactcagta
    33541 caccacaatg acaacgggca tgggggcaag aacgcagccg ttggcatgga taattacgac
    33601 tgccggattt tctctcgaat gtccctgcta tgaaaagcgg cgtcaggtgg ctgagatgct
    33661 ggatgatgtt attccgaacg aggaactgtt tggcatcatc tataccttgg atgacgggga
    33721 tgactggacc aagccggagg cattagccaa ggcaaatccc aatatgggga tatcggtcga
    33781 agaagattat ttattggcac agcagcggct agcaatcgat gttccatccc aaaccaataa
    33841 gataaaaacc aagcacttta atctgtgggt ttcagcaaaa tcggcatatt tcaatctcga
    33901 aaagtggaaa gcatgtgctg atacgtcatt aaagataagt gatttttacg gtgaggagag
    33961 ccatttaggt atcgacctgg catccaagct ggatttgaac tgtgtttgcc ctgtttttac
    34021 ccgcgagata gaggggcgta cgcattattt ttgtgttggc gctcagtttt gggttcctga
    34081 agataccgtt ttttctcctg atccaaaact gaaacgtacc tccgatcgct atcaaaagtt
    34141 cgtgaatatg gggaaactca tctccacaga cggcgcagag gttgataaca gacaaatatt
    34201 tgaacacatt gtctcaatga atgagacggt taaagttatg agtaccccga tagacccaca
    34261 cggtgcaacc agtctttctc actcgctggc tgatgaggga ctcggtccta tcacaatcat
    34321 tcagaactac accaacatga gttcaccgat gaaagagcta gaagcagcta tcgcatctgg
    34381 tcgatttcat catgatggga accccgtcat gacatggtgt atcagcaacg ttgtagggaa
    34441 gaccattcca ggcagtgatg atgtcgttcg cccaacgaaa gaaggcgatg aaaataaaat
    34501 cgatggcgca gtcgcgctca taatggcaat cggtcgggca atgttgaatg agcctaaaga
    34561 tttcctttcc actctcgatc ctgatgaaga cctgttaatg ctatgaaatc actgattact
    34621 gatgttatcg ggctagccgg tttcggttcg cttgccgcag gcgtgtatct gcaatttggg
    34681 ctggccgcag cattaattct gtgtggtgtt ctgttgctaa tttttgcgct ggccgccgca
    34741 agggggaaaa atgctacttg ataccctgtt tcgtaatgaa ccactggaga atcccgccac
    34801 tccgctcact ggcgattccg cagaaaccga caatattttc ggacgtgacg tttacgtcag
    34861 tcctgaaaca gccatgaagc tggcggcggt ttatgcctgt atctacgtta tttcctcaaa
    34921 cattgcgcag atgccactac atgtgatgcg caagtcagat aacaaggtgg agccagcacg
    34981 cgatcacccc gtcttttacc tggtacacga tgaaccaaac acatggcaga ccagctataa
    35041 atggcgtgag ttaaaacagc gtcacattct cggctggggg aatggctaca catgggttaa
    35101 gcgcggtcgg cgtggtgagg ttacggctct tgaatcatgc atgccgtggg aaacaacgtt
    35161 actcaatacc ggaggacgct atacctacgg ggtttacaac gaagagggcg catttgctat
    35221 cagtcctgat gacatggttc atgttcgggc gctgggaaat aaccagaaaa tggggctaag
    35281 cccgatcatg cagcatgctg aaaccattgg catggggatg agcgggcaaa aatacacaag
    35341 ttcatttttt aacggtaacg cccggcctgc ggggataatt tcagtaaaga acgacctgaa
    35401 cgcggaaagt tgggtgcgcc tcaaggcgat gtggcaaaaa gccgttgccg ccctgcgtag
    35461 cgaggagaac aaaacaatgc ttctccctgc gcagttggat tacaaggcgc tgactgtatc
    35521 cccggttgat gcccaaatca ttgacatgtc gaaactgaac cgctcaatga ttgccggaat
    35581 attcaacgtt ccggcacaca tgattaacga tctagaaaaa gccactttct caaacattac
    35641 ccaacaggcc atccagtttg tgcgctacac gatcatgccg tgggtgacta actgggagca
    35701 ggaactaaat cggcgtgtat ttactcgtgc agaacgcgca gcaggctact acacccgctt
    35761 caatctcact ggacttcttc gcggtacgcc gcaagagcgg gcgcaattct accactttgc
    35821 aattactgat ggttggatga gtcgcaacga ggctcgcgca tttgaagaca tgaaccccgt
    35881 agacggactg gatgaaatgc ttgtcagcgt taatgcgtcc aaccctgcta acaatttcaa
    35941 cgatacaaca aaagaggagc aacccaatga atgaccgtga gttgcgttgc tatagcggcg
    36001 aggttcgcac agaacaggcg ggtgatgggc cagcgcatat tgtcggctac ggctcggttt
    36061 ttaactctcg atctgaaccg ttgtggggat tcagggaaat catcaagcca ggcgcatttg
    36121 atgaggtgtt gggcgacgat gtgcgagcgc tgtttaacca tgatgccaat ttcatccttg
    36181 gacgctcggc ggcgggaaca ttggtcatcg gcattgatga taaggggtta cgttacgaca
    36241 ttactgcgcc agacacacaa actattcgtg atctggtgct ggctccgatg gcgcggggcg
    36301 atatcagcca gtcatccttt gctttccgtg tcgcccgtga cggtgagcat tggtatgagg
    36361 atgaagaggg gatcgttatt cgtgagatta acaaggtttc ccgactattc gatgtcagcc
    36421 ctgtgacgta tccggcgtat caggaggcag attccgcgct gcgatctatg gcggcatggc
    36481 aggaggcgcg tgatagcggc gcactacaga aagctatcaa tgaaaaaatg gcgcgtgagc
    36541 gcctccttaa tttgataaat gcgtgaggaa cgacatgaaa tatcatgaac tgaagcaaaa
    36601 acgtaacacc atcgccaccg acatgcgtgc tctgcatgac aagatcggcg ataacacgtg
    36661 gacagacgag cagcgcaccg aatggaataa agcgaaatct gaactggatg gactggatac
    36721 gcagattgcc cgcgaagacg agttacgccg tcaggatcaa tcgtatgttg atgacaacga
    36781 gcgcgagcag cgtcaacagc agcagaacaa cggcgatccg gcagcgcaag cccaagaaaa
    36841 gcgccaggcg gcattcgatc gcttcctgcg taatggcttt gctgaattaa ccagtgaaga
    36901 gcgtcaggcg ctgaaggaat tgcgtgctca gggaaccacg ccagatgcaa aaggcggtta
    36961 cacagttcca acgcagatgc tgaataaagt cgtcgattca atgaaggctt acggcggaat
    37021 tgccagcgtc gcgcagattc tgaacacatc taatggtcag gacatcacct ggtcaacctc
    37081 tgatggcacc tctgaagaag gtgaattgct gggtgaaaac actgaggcat cggaagagga
    37141 cgtgagtttt ggtactgcga ttctgggtgc caaaaaactg tcatcgaaaa ttatccgcgt
    37201 ctctaatgaa ttactgcaag atagcggtgt tgatattgaa gcatatttag ctgggcgtat
    37261 cggtcaacgg atcgggcgcg gtgaggctaa atatctggtt caaggtaccg gcgcgggtac
    37321 tccggttcaa ccaaaagggc tcgtagcttc agttacgggg acggttaaca ccgccgctgc
    37381 cgcaacgttc acctggaaag agatgaatag cctgaaacac gctattgacc cggcatatcg
    37441 cggtgtcccg aaataccgct gggcattcaa tgattccaca ctccaaatca tggaagaaat
    37501 ggtggacgat cagaaacgcc cgttatggtt gcctgatatt gctggcggct ctccagctac
    37561 gattctcaac attccatacg ttatcgatca ggctatcgat aacattgcag caggtaaaaa
    37621 attcgcgttt ctgggcgatt ttaaccgctt catcgttcgc cgaattacgt acatgacgct
    37681 caagcgccta gtggagcgct atgctgaata cgatcagacg gcattcctcg cgctccaccg
    37741 ttttgattgc gttctagagg atgtggcggc tatcaaagcg ctggtgggta aaccagcata
    37801 actggaaatc tgaattgact catgccgcgc aagcggtttt tttgtgcctg caatctggta
    37861 acgggttgca ggcggagtgg tttttatgat tccaacagtc aaagaattgc gcaatcagtg
    37921 ccggatcgac agcgacgacg ctagcgagga tgaggtgcta actctttact gtgcggcggc
    37981 aaaacggcgg gcggagaatt acatcaatcg aacgctgcat gatgattcag cgccggaaaa
    38041 tgacagtgaa gggctggtga tatcgcctga tatcaagttg gcgctgatgt tggcggttgg
    38101 attctggtat gaaaatcgtg aggcgcagaa cctgccaacc ggattctttg tgattctgga
    38161 accctacagg tttatccctt tatgaatatc ggaaaaatgc gccaccgcgt caccatccag
    38221 aatttcacca caacccgcga tgctggcggg caacccatag aaacatggaa tgacatcgct
    38281 actgtgtggg ccgaagtttc cccgatcagt ggccgtgaat tggtttcctc tggtgcggta
    38341 tctgctgaag cgacaatccg tgtgtggatg cggtttcgtc gagatgtatc ggcggcatcc
    38401 cgtctgtatt gcctgaatgg accatttaaa gggctggcgc tggatattat cggtccacca
    38461 ataccagacg gtaagtgcac ccggctggaa atactgtgca agttgggggt gaaacgtgat
    38521 tgattttggt cttgatttct ccggcctgag cgaaatagca aaagatctgg aaaaactgag
    38581 tcgtgcagag aataacaagg tgctgcgtga tgccactcgc gccggcgctg acgtgttgaa
    38641 agaagaggtt atcgatcgcg ctcccgtgaa cacggggaaa atgcgtaaaa acgttgttgt
    38701 ggtaacgcag aaatcacggc gaaaggggga aatctcatcc ggcgtgcata ttcggggtgt
    38761 taatccgaat actgggaaca gcgacaacaa aatgaaggcc agtaaccctc gcaatgcgtt
    38821 ttactggcga tttgttgaaa tgggtacggt aaatatgccc gctcacccgt ttgttcgccc
    38881 tgcatttgat gtcaaacagg aactggcggc gcaggctgca atccagcgca tgagtaccgc
    38941 aattgatgag gcgttgagtc gatgacagaa accgatattt acccgctaat ctctgatctg
    39001 tctggcggta atgtttatcc gtacatcatt ccgctaaacg cagaaggaga gccagctatt
    39061 tccccgccgt gggttgtatt ttcgttcgtg tctcagccgt ctgctgatgt gctgtgcggt
    39121 cccgctgaaa caacatcatc cgttcagttt gacgtgtatg cgaaaactat tgctcaggcg
    39181 cgcgagattt gcgcggaggt catcgcggca ttatcgccat tggctccagg caaccagatg
    39241 ctaacacagg gacacgatac agaatcatcg ttataccgtt gtacggcaga actccagttt
    39301 atcgactaac cccacgtaat caccatcctg acccgccatt gagcgggttt tttatttttg
    39361 gagacgtcca tgaccgcgct ttatgaaaaa tcacagaaaa cggtaatcag aatctcgtca
    39421 gcgccgacca cgcttgaggg gattgaatca gctacatttc tcgatctgag ttgcaccatc
    39481 aaagaaatcc agttcactgg tggacagaaa aacgacatcg acgtaacaac gctgtgctcg
    39541 gacgaaatgg aaaacatcaa cggcttacct gcacagtctg aggtctcatt gtctggcaac
    39601 ttttatcgca atgcagcaca agacgcactg cgtgatgcat acgataacga tactcgttat
    39661 ggatttgagg taatctttcc gtccggcaat ggattccggt tcttatctga agtgcgccag
    39721 catacgtggt cgtcaggcac taacaacgtg gtggctgcaa cattctccct gcgactgaaa
    39781 ggcaggccaa caaacattgt gcctggtcca ttggcattta caaccaacct accagccaca
    39841 aggacggtgg cgactggtgc cgcgttggcg ctggccgtgg cggttagcgg tggtctcgcg
    39901 ccgtactcct ataaatggct aaaagatggc accgtgctga gcggtcgcac ggctgcgtca
    39961 ttcaataaat ctaccgcaga tgctggtgat gcgggggcgt atacgtgtga ggtcactgac
    40021 tcagcatcat cgccagtaac gattacgtcc gcgtcttgca ccgtcaccgt tagctaatct
    40081 ggagcaccaa aagcatggca aagaaaagca ttaaatctct ggcattagcg cccggcgcgg
    40141 gttttctcac aaaggctatt gaggttccag agtgggaagg ggtgaaagtt attctgcgcg
    40201 aaccaagcgc tgaagcgtgg ttacgctggc aggacgcggt aaaaactgac gatgacggcg
    40261 aatccctgtc tgtgtcagaa cgcgcccgcc gtaaccttca cgccgatgcg acgttattta
    40321 tcgatatcct gcgtgatgaa gacggcgaac ctgtattcag tgtcgatgat attgaagagg
    40381 ttgaaaccat ttacgggcca gtgcacagtc gcctgttacg tcaggcgctt gatatcatca
    40441 acgatacgga gatcgccaaa aaaaagtagc ttcgccggga atgcagtttt tgatggcgct
    40501 ggcgctccgt atggggcgca cgctgtcaga attgcgtcag gaaatgacgg ccaatgaatt
    40561 acggatgtgg attgagtacg acaaattatc tccgatcggt gactcgcggg gcgacactct
    40621 ggccgcgcag atcgttagtg cgatttgggg ggctcagggc gttaaagtgc cgctcaccga
    40681 tgcgatgttg gactggtcag gaaaagagga ggaagaggca gatcagtttg gcaatcttga
    40741 agcgtttctt tctatggctg ctggatagtg atatttttct ctccttatcg cgaaaaggag
    40801 agaaatatga gtacctctgg atggattatt gtttttctag ttgcccgagt tatcgattta
    40861 tttatttggt atttattaaa tcgaagtagc gttagagcta atgagcagat aaaaatcttg
    40921 caagaaataa atgagaaaca aagtgcgcaa ctagagttgc taacttctat tgttcataaa
    40981 aaagatggtc cagaaaaaga ctatcttgag gaggctaggc gaagagctgg gctaactgat
    41041 taatttaacc cgctacggcg ggttttttat tgtctggata aaataaaatg gcaaccctgc
    41101 gcgaattaat cattaaaatt tccgctaatt ctcaatcatt ccagtcagag ataaaccgtg
    41161 cctcacgtat gggggctgat tattatcgaa ccatgcaaaa cggagggcgt caggctaccg
    41221 ctgctgcgcg tgagagtcaa cgcacatttg ctgaactgaa taaccagttt gttggtatta
    41281 aatcggcagc agcaggaatt gttggcgcaa tgtctgtaac ctcattaatc acaatggctg
    41341 ataactgggg tcaagtcaca tcgcgcatga agatggcgac tgagtccagc gatgaattgg
    41401 caatggtgca gcgtcgttta atggaaatca gcgatcgcac ctataaaccc attgaggaac
    41461 aggcagaact attcatccgg agttctaacg cgatgaaaga gttgggttac tccactgctg
    41521 gcaccataga ttttatcgat tccatttcaa gtgcattaac gatcaatgcc gctagtgctg
    41581 ataaagggca gtcggctatt aatgcgctat ctaaatcaat ggttcaaggc aaagtttccg
    41641 gtgacgagtg gaataccgtc atggaggtta tgcccaccgt tattggcgac attgcccgcg
    41701 ctatgggaac gacagaaacc gcagttaaaa aactggccgc agacagcaaa ttgtctatgc
    41761 aacagtttgc tgatgctgtg attgctgctc agcagaaaaa tgcggaactg gctgaaaaca
    41821 tgccaacaac tgttggcgat gcggttacaa aactgtccaa ccatatgaaa aaatatgttg
    41881 gagaggcgaa cagtgcgtat ggaacgactc aggctctttc aggcggcatc agtagtttag
    41941 ccgataatat cgatacggtg gctacagcag gggcggcgct ggtaggcatt ggatttgccc
    42001 gctattttgg cggtatggcg tcaggcgcat acagtgctac agcagggata atttctgctg
    42061 caaaaagtga ggtcgcactg gctgaagcgc agttgcgcgg cactcaaatt gctgttgccc
    42121 gtgctcgttc tgctgtttat cgtgctcagc aggcgctcgc cgctgcacgc ggaacggatg
    42181 cacaggcagc ggctgaaaag cggctagcgg caactcaggc ggcagtagct cgtaacgttg
    42241 tggcgagaac agcggcacaa acaactctga acaatgtcac tgccgttggg tcgcggctaa
    42301 tgtccggcgc tttaggattg gtgggcggcg ttcctggtct gttgatgttg ggtgccggtg
    42361 cttggtacta catgtatcaa aagcaagagc aggcgcgccg atcagctcag gaatatgcca
    42421 gtactattga tgaaattcgt aaaaaatcag gcgcaatgtc gctggctgat gcgtcagata
    42481 attacaacaa aacacaatca tcactatcag agcaaaaccg attaattgat gaacagaaag
    42541 aaaagatacg cctgattcgc gttgaaattg aaggctacca gaagatactt gcaaatcccg
    42601 gcttaactgt cggcggttat atggttaatc atctagtaag tgtagaggat gcaacgaacg
    42661 gactatcagc ggctacggaa ggtttatctg ttgaacaaga tcgcttgtct cgcctgcaag
    42721 gtaaggctca ggacattcag agtgttttgg ttggtttgga gtatcgccgc tcggagttaa
    42781 ttaagcagca gacagcagat cagaatgctg cgtatcaatc tttattacga atgaatgggc
    42841 aacacactga atttaaccgc ctgctatctc tggggaatga tttattgtca gctcgtcagg
    42901 gtaatgcatc gtttccgttt cgagtcccta acgctaaatt aactgacaaa caaactgatg
    42961 ctttagaaaa aagtcgtcaa gatttggaac tttccaagtt aaagggggag gccaaggagt
    43021 tagcgaggct gcgatattct gccgatgaat tagggttaac agataatcca gcaaatcaga
    43081 aatccagaca ggattatatt aataataacc tggacaaatg gagaaatgac gaagcaaaca
    43141 agccgacaaa gaaaggtccc aaaactgatg aagaaaaggc tatcgataat tacgatcgcc
    43201 taatcaaaca gcagcgcgaa caattggcgc tcggtagctc aaatactgag ttggcgaaaa
    43261 taaaatatca gacgacacag ggggaattat ctaccctaac gagtattcag aaacaggaac
    43321 tcgctcgaaa tgctgcactg attgatcagg cagaaataag gaaaagagcg gctgaatacg
    43381 aaaacgggct gattgattcc aacgctaacg caaaagcggc gaacgatacc aatctaaccg
    43441 gattcggtga gggctctcgc gttcgtgatc gcatgaatga gatgatcgca attcgtcgtg
    43501 attttattca gaaagacgac gaattgcggc ggcaacatca ggcaggtgaa atcgatgatg
    43561 agtttttcaa tcgcgcaatt gcactgaata aacgttatct cgataagcgc ctgagcgatc
    43621 agcaaatgta ttacacgtcg ctcgatgatc agcgtaataa ctggatcggt ggtatgcgtg
    43681 atggtttcgc tgattgggct gatgatgcca cggattacgc tacacaggca tcgcagggta
    43741 tgaaaacagc gatgagcagc gctgtaggct ctattactga aatgctgaac ggtaataaaa
    43801 atagttggaa agattggggt gtgggcgtcc tgaaaatcat tcagagcgtt ttgattaaca
    43861 tggccgtggc aaatgccgct aacggtgcga gtagtataat tggcactgtt tttgggattg
    43921 gtgcatcagc tatggcgggc ggggccggag ccgcgtcagc aaacaatgca ttctcgactg
    43981 gggcgtatag caatttgaca ttcaatgcgt tgggtggtgt ttatgattct ccatcgctca
    44041 gcgcatacag cggcggtgtt tatagcactc cgcaaatgtt tgcgttcgct aaaggggctg
    44101 gcgtattcgg ggaagcgggg ccagaggcga ttatgccgct cacccgcgcc gcaaatggtt
    44161 cgctgggtgt gagggcgatt atgccggata ttcaatccac aaatagcggg gggaatgttt
    44221 acgtgaccat caacgaaagc ggcactgcgt ctgtttctgg caatggcgat cagaatttcg
    44281 cccgtgagtt tactcagata attcaacgtg agtatcgcaa attgcgtgac aaagatttat
    44341 cgcagaacgg agtgttaaac cgggctattt cggggcggcg ataatggaaa tcttcacttt
    44401 ctgccctcgc gttaatccgg agggcgcgtt cacgcagcga acgcgatcga tacagtttgg
    44461 tgacggatac acgcagcgct ctggcgatgg tattaacggc gagtcacaga gttggccatt
    44521 aacgtttgtt ggtgatgccg aatatgttca gccaatcgtt gcattcctac gccgtcacag
    44581 gggatatgcg gcatttcaat gggtaaaccc actcactgag ccagggctat attgctgccc
    44641 tgatggattt aacgtcacag ccctgggtaa aaacagtagt ggtgctcaaa ttttacaact
    44701 cacagcaacg ttcgtgactg cataccacgc gtaactagtg ataggatgat tctgattgta
    44761 actacacatg gatgcatata tgaaaaaaat aatttttatt tttctgggta tcgctgtttt
    44821 atctggatgc tctagacctc acgggcctgc tgaaaaaatc ctaaacccag aattagtgac
    44881 tccaaatgtt agcgagcagc aaacaaaaat tacagtcacc cggaataagc agtttatagg
    44941 tggtggcagt ggtggtatgt gtaaattctt ggtttcaatt gatgacagag atatagctct
    45001 attaaaacag aaccagtttg tgaccgctta tataaataac ggattgcata aactgcgagt
    45061 cagcaatgaa tgcaacgtgc tttcaatggg aatgaggaag acacttgatg ttgttgctga
    45121 tggcgctgat caggaatatg tcaccgaaat agggatgtgg gggcaatata ggatgtggag
    45181 agtaaaataa ttactcatcc tctattattt tttatgatag tcggcccgct taattgcggg
    45241 tttttattgt cgagataaaa tcatgtcatt aaataccgac tcccaaaaac tggagccggg
    45301 cgatcgcgtg cgtctgtttg aagtggactg caccgcgttc gacggccccg aactgtattt
    45361 tcacaatcat cccattcaac acactgcggc agagattgaa gcggcgggcg gggatgaagc
    45421 aaagctgctg gctaaatcaa tctggtggca agggcaagaa tacaaagcgt ggcccactca
    45481 gatagagggg ctggaaatga ccagcgacgg cagcgctcca actccgacgc tatcggtcgg
    45541 taacatcgat gggacgatta ccgcgctgtg tcttgcgtat cagaatttgg cgcaggccat
    45601 cgtgcgtatt cacaccacgt ttgcgcatta tcttgacgtc cgtaattttc ctgacggcaa
    45661 cgccgacgcc gatccgacac aggagcggct agaggtttgg tacatcgaca gcaagattcg
    45721 tgaagacgat acggctatct cgtttcagtt gtcatcacct gccgatcttc ggggaatcat
    45781 gctcccaact cgccagattc atagcctatg cacatggtgc caacgtgggc agtatcgcgg
    45841 tgcatcgtgt ggatataccg gcactaacta ttttgatgca gatggtaatc ctgttgacga
    45901 tccagcactg gatgaatgtt ccgggctgct atcaactggc tgtaaacctc gctggggtga
    45961 agatgcagaa ttgccgttcg gtgggttccc tggctctgcg ctaataaaga ggtgatcgtg
    46021 aaactcagga aattaatcat tacagaaata ctcgctcacg cagagttgga ttatccgcgt
    46081 gaatgttgcg gcgtaattgt gcagaacggc aggaaacagc gttacgtcaa atgtcgcaat
    46141 acggcgactg aacctaacga ccaattttct atgagtccag atgattacgc cgaggctgag
    46201 gacacaggca caattattgc gatcgttcac agtcaccctg acgcgacaac gcagcccagc
    46261 aacctcgatc acgcgcagtg tgacctgtca cagttgccgt gggtaatagt gagctggccg
    46321 gagggcgaca ttcgcaccat tatgccgagc gagggcgtaa agcctctgtt agaacgtcca
    46381 tttgttcacg gcatatggga ctgttacgcg attgtgcggg attggtatca gttagagcga
    46441 ggtatcacgc tgcccgattt tgaacgttcg gatggatggt gggatcgggg cgaagacctc
    46501 tacataaaac attacgccag cgggggattt actgccgtca gcagtgagct acagcccggt
    46561 gacgtaatca ttatgcaagt gcgggcagat gaaccgaatc acgccggggt ttacattggc
    46621 agcggcgaaa tggtgcatca catgtacaac cagttaagcc aaaacgtgcc gtatggcggg
    46681 tactggctgg acagaactat tacccgctta cgatatacag ggggtgccaa tgtcggtagc
    46741 aattgagtat cagccactaa aaaccatccg gctgtatggg gtgctggggg caacgtttgg
    46801 gcgcgtacat cgtcttgcag ttgaaagccg tcaggaagca atcaaggcgt taagcgtaat
    46861 catccccggc tttgaaaagt ttctactgac gagtaaatcg cgtgggctaa cgtatgctgt
    46921 gtttgatggc aagcggaacc tgtctaaaga cgaactcgat tttaacatca gtagtgaaat
    46981 ccgcatcgca ccgattatta tcggtagtaa acagactgga ttatttcaag tgatactggg
    47041 tgcaatactg gttgttgccg ggtatttcac attcggcact acgtcaacaa tcggcgtcag
    47101 tatgatgatg ggcggggcat caatggccct cggaggtgtc atccagatgt taacaccaat
    47161 gcagggcggg ttatcaatgc gcgaatcccc tgacaataaa ccgagctatg cattcggcgg
    47221 gccggttaac tccattgcgc agggtaaccc agttcctatt ctctacggtc gccgcagaat
    47281 cggcggtgca attatctctg cgggaattta cgcagaagac cagcagtaac atttaactca
    47341 ccaccccgac ccgccgcgag cgggtttttt cgtttctgag gtatccatgc aatcagtgat
    47401 tgaaggccgt aaaggtggca gcagtaatgc gcgaacgccc gtggagtctc ccgactctat
    47461 ccagtcaacg tcttatgcaa aaatgctgtt ggcgctgggc gagggggagt tcaagggcgg
    47521 tctggatggc actagaattt ttcttgatgg gacgccgatc actgatgcga acggtaatgc
    47581 taatttttcc ggcgttacgt gggagtttcg gtctggcaca cccgatcagt catatatccc
    47641 aggattcccc ggcgttgaaa atgaaatcac agtaagcact gaattaacga gccaaattgc
    47701 gtgggtgcgc tcactaacga acacgcaatt gtctgctgca cgactccgtt tctcatggtc
    47761 tgcgttgcaa cagcagtatg ataacggtga tgtgggcggt tatcgcgttg agtatgcaat
    47821 tgatgtggcc acggacggcg gcagttatca gcaactcctg agaaccgcag tagacgggaa
    47881 aacgacaaca aagtatgagc gcagccaccg cattgatctg cccagcgcta atacgggatg
    47941 gcaaatccgc gtgcgccgta tcacgccaaa ttcaacgagc aatcgtatag cagatcgcat
    48001 ggtcattgaa gctatcacag aggttattga cgctaaattg cggtatccag aaacagccct
    48061 gttactggtg caatttgacg ctaaacagtt ccaaaacatc cccgcagttt cctgcgaacc
    48121 cgatggccgc attattcgcg ttccgtctaa ttacgatccg gttgcgcgta gctatagcgg
    48181 agcgtgggac ggcgtattta aatggacgtg gacaaataac ccagcgtgga tttattacga
    48241 cattcagatc agtgagcgtt ttggactagg taatcgtatt cgtgctgaga atttgtcgat
    48301 cactaaatgg gatttatacc ggattgcgca gtattgcgat cagttagtgc cggacggtcg
    48361 gggcggtagc ggcactgagc ctcgttttct ctgtgatgtg tacattcagt cacaagaaga
    48421 ggcgtggact gtgctcaacg atctgggcgc tatttttaga ggcgcgacgt tctgggctaa
    48481 caatcagatg aatgtcgttg ctgatatgcc ccgcgacatt gattacatcg tgacgcgtgc
    48541 gaacgtcagg gatgggaaat tcacatacag caacgcgagt gagaaaacgc actacagcca
    48601 ggctatggtg tcgtggtctg accccgcaaa cgcttatcag gatgctattg agtcagttaa
    48661 cgataataaa ctggttcggc gttatggcat taaacaggca gacgttacag cgattgggtg
    48721 catccgtcag actgaggcta tccgccgcgg aaaatggatt ctgcacacga acgatgcaga
    48781 ccgggcaatc tcgtacacaa tggggttgga tggtgacatt ccagtgccag gttcaatcgt
    48841 tggtgtcgct gatgcgctgt tagccggtcg tccgctgggt ggacgcatta gcgccgttga
    48901 tggccgcaat atcattcttg atcgcgtgtc gtctgccgcc gttggtgagc gcctgattat
    48961 caatctgccc agcggcacgg cgcaggggcg cacaattgag gccgtcaacg ataaaatcat
    49021 tacagtcacg actgaataca gtgaaacgcc gatccctgaa tccgtttggg ctgtcgatgc
    49081 tactgatttg gcgttgcaac tttacagaat catcggagtt gctgagggtg acgatggggt
    49141 atcgttcgat attaccggca ttcagtatga ccccgataaa tgggataaaa tcgacactgg
    49201 cgcacgcatt gaatcgcgcc cgatcagcgt tattccccca tctgtccagc ccgcccctgc
    49261 aaatgtttca atcaatagct acaacgccgt cgatcagggc ataaacatta cgacattgcg
    49321 cgtgacgtgg gatagagccg agagcgcgat agcgtatgag gcacaatggc ggcaggacaa
    49381 cgggaactgg ataaacgccc cgcgcacctc cgcgctaggg tttgaggtgt ctggcattta
    49441 tgcagggcag taccaggcgc gtgtcagagc tattaatgcg gctgaaatct ccagcatgtg
    49501 ggcgaacgcg caggaaacca cgctgaacgg caaagagggc aacccgcccg cgctgtccag
    49561 cttcacgacg acgccgcttg ttttcggtat caagctcgac tgggtttttc ctgctgacac
    49621 ggccgacaca ctgaaaactg agattcagta ttccccaacg agcgccggcc agaatgcatt
    49681 attactggca gatgtggcct atccaacgcg aagctatcag cagatggggt tgagcattgg
    49741 tcaagagttt ttctatcgcg cccgtattgt cgataaatcc ggtaatcagg ggccgtggac
    49801 cggctggata cgtggggaat ccagcactga cgttagtgat atcactgacg ttatcgttaa
    49861 agaggttact gatactgaag cgtggaaatc tctaattgat ccgctcgagc gtgatatagc
    49921 tagcgggatg ttgaacagta tcgagcaggc gaaagcgatt atccgcaata gcctcgccaa
    49981 cgactcggaa acccggcgtt ggcgtgctca aaacggtgaa cgcacagcag aaatcacgga
    50041 aacccgcgct gctgttgcta atgaggttga agctaggacg atcgcgatgc tggaaatgca
    50101 atctcagatc ggcacaacaa acagcaatct caatgcatta cagcagacag tcacgacact
    50161 ggaacagact acagctcagg atatcacgag tctaaatagc aagatgactg atgcggaatc
    50221 cggtatttct gctaattcgt cggcagttca gggactcaaa acgtcagttt caaatattga
    50281 tgggcaattg tcggcgcagg ttacgcaaat tagtacgtta acagcaacag ttaatggtgt
    50341 ctcaactgaa atcagtgacg ttagcagtgt cgttaatggc atggatgcga aaatgtcagc
    50401 gtatcgatca attaaagtcg ccgtcgatgc aaacgggcgt cagtatatcg ctggaattgg
    50461 tttcgatgtc tctaataatc aggagggaat gcaggcgaat attattatgc tcgccgatcg
    50521 ctttacaatg atggttaacg ccggaggtgt accgacaccg atatttacca atcaggggac
    50581 gcaggttatt ttgcgtagtg ctgttattgg tgatgcgaca atcactagtg caaaaattgc
    50641 cgactctgct ataaataacg ccaaaattgg aaacgctata tattcatctg gctataaaga
    50701 gtcaggcggg ctgggcgggt ggttgatcag taaaccagaa aataatttat cgttcgtgga
    50761 ctcagggaaa cggctgcgca tacaaatcgg agtaatcacg ggggtagctc ccgatgtctg
    50821 aattaatcga cataatggtg acgccagata tgctaaacaa taaacagata ctaatcagtg
    50881 ggtgcgtgtc tgttaggtat ttgcaaacca ttactctgcc cgttcctaca aacaatcaaa
    50941 tgtcttactt ttcatgggat tatcatatag cgaataaaac acctagctct attttacttc
    51001 ctgttattgt tactgcgggt aattggtgga tgcaaggcgg cggcggtgta gtgccgttca
    51061 gaattaataa tatagcaaaa ttagcggtca acggtgatgt tgtgcgagct gagattgaat
    51121 ctatagcttg ggggagtaga caggaaatcc cgaattcagg tgtcattgat gtttatgaaa
    51181 tccttacgaa tgacactcag gaacgttcgg attttggtct attaataaca gatggtgttg
    51241 attggacgca attcaacagt acatcagaaa tttgcgccat ggtacacagg gaaacggtgg
    51301 taataaatgg ggcgggatgg gtgctgccgc cccatattgg tgacagacga cgatgtataa
    51361 tatttggcga ctggagttcc tctgattctg ccatacagta cgattcatta aattataaaa
    51421 tcagtaggat tggagctgat attgaagttg atatttatgt gttttcggtt ggtgccaacc
    51481 ttacgactcc aactgtcggg atcgcagtat ataacgagat gggaaatata acgttctcat
    51541 ctgagaatgt tcccattatt tatccaaaca cggagttcaa tccaaaacgt aacgcacagt
    51601 tattaccgca cacaaaaaat cttgtacaga ttagagatta tggacataag gtggatacag
    51661 agttggaccg tgtgttgata cggaaaactg cactgatgaa aattggtaat agagcgaatc
    51721 ttgtacgcgg tgacctgata tttaacgatc agaccaaaat tggtattcat gacatagagt
    51781 tcgtatcatc taacctcatg gtattagatg gaaataaata cggtaattaa aattttcatc
    51841 atctctcaat aatacaatac cgcttcggcg gttttttttt gcgtctggag aaaatatgtc
    51901 ttggtataaa acaggattcg ttactgtaac aaataacagt aaaatcatta caggtactgg
    51961 aacacaattc acaaacccac taaacggtgt atcagcaggc cggatgttat tgttacctgg
    52021 tgctggaact gtgcagattt atgaaattga gtctgtgcag tcagatactc aattaacgct
    52081 cgtatctgcg ttcgagggca caactggcag cggtaaacca tacgcaatcc ctacgtcacc
    52141 gagcgtgtct attgagcagt tcgcgcatga gtttgcttct acactcgcat actatcagca
    52201 gcagttgcag ggctggcagt caatactgac tggttctggc gacattacgc tcactgcgcc
    52261 agatggacag accattacag ttcgtagcca agccgaatgg gataggctgc tatctcaagc
    52321 aacgactgat attagtgatg cgatgaaaaa atccgcaaac ggatcagata tttccaatgt
    52381 cgccgcattt agacaaaata tcggattaca aaatgcaatg ttaattgggc aattcggttg
    52441 gggtggtaaa gttccgcgca taccagataa cgttgatctt ttggaatatt tcacttcaag
    52501 taggccaacc ggattatact ggggaggccc ggcattaaat aaacccgctg gattcacgga
    52561 cgtactttat gaatggctca caatagaggt ggaaacgggt ttattttatg gaacgctaac
    52621 cgcatataat ttcacaccgg gagctggtgg ctacaaaata gcaggtcttg aggtgtttaa
    52681 taaccagtgg ggcgtgtggg gctacgtttg ggatactaaa aaccttccat ctccggttac
    52741 tgaatctacg gctcagtgga taactggcga taagggtttt aaaagagaca atcatgcatt
    52801 tacaatttca tcagccacac cggaagctgc cagttacatc attgcgcaaa atagtaacgg
    52861 cgtaaattta tggtatttgg gcaaaggctc atctgggcct attggcaata tatcactata
    52921 taattataag ggcctttgtg gagttgattt aaactctaac ggttcagtta atataaacgc
    52981 cgctgcattt catcataacg ggcatgacgt gctatctaat ggattaaatg cagttgcaga
    53041 ttccgggggc tactggaaaa cagcttctcc agtcatcaat atttatgctg atggttcatt
    53101 tactactaca gatgaagccg ctggcgttaa agttgaacgg ctgagcgagg gcgtctacaa
    53161 aataacaggt tgccagggca tgcacccgga tgctgcatgg aatggcatcg acggcggtgt
    53221 gagtaatccc aaatgccgca acgataaagc gctactgtgg aacaactacg aagttgacga
    53281 tgacggctct gttactgtcc acacctttca ccgtgtccat ccagacgcta tgccgttcgc
    53341 tcaaaacaga ctgacgctcg acaaagagcc gtttgacccg aaaaagggcc acacatcaga
    53401 tatggagtgg ccggaccaaa cgccgatcga cgttccgcga ggcttgttca ttcaagtgcg
    53461 cgtgaacatg ccggagcgca tcgaaacgaa acctgtagtc agccacagca acgtttactg
    53521 caataccatc tcgccagttt aatcacgcga aaaacgacag ctgcccggct atgatgtcta
    53581 gtgcatcctc aagtgtcggc acgggatcaa tatgtatcgc tggcgcgtca gtttcgccga
    53641 cgcgtacagc gacatagaaa ccagagtctt caatgacagc gtatgaaccc acagggcaat
    53701 cagtcagcat gtcgctgtcg tcgagtacgc agatcgtcgt tccgtgatat gtgatcgttt
    53761 ccatttctca tccttgattt tatgacaggt tattcccccg taattccacc ataattcccc
    53821 ctgtaaaatc cagacgaaaa aaaaccaacc gtaagaggtt ggtttttctg ggattatttg
    53881 gtcggcacga gaggatttga acctccgacc cccgacaccc catgacggtg cgctaccagg
    53941 ctgcgctacg tgccgatgct atgggtattt atactacatt ttcctgaccc tattgcaata
    54001 gccagatgga acgactgctt tagatttagg cagttagtta gcaataaagc gcctttcgtt
    54061 cgttagtacc tgcaagagta gggcaagttg cggtttttca tcattcagcc gatttcccgc
    54121 catgtcgtaa gctcggtagt taccgttgct ttccaacacg ataatctgtt ctggtgtcgt
    54181 gatcagcagc gtgcctccgt tgccgttaat cagccacgga tagcgtcgtt gggcagagaa
    54241 caggtcttcg ccttgtgcat aatcatccgt actgttttta acatggagca ggcgctgcat
    54301 cagtgtgacc atgacgtcct tgttgtctgt cattttcgta atggtctgcg ctggcgtatt
    54361 cggccagtga acaataagcg gtgtttgcca ttgcgtgcga gtgaaacgtg ccgtgttgtt
    54421 ggtattggca ttctggtttt gtgcggttgt cacgataatg actgtgttat ccagaatgtt
    54481 cttttcctgc aaagtacgga tgatttgacc aatctggcgg tcaacatcct gaatattcat
    54541 tcggctgttt ggctcgatgt ctttgctgga agcatttttc ggcgcactgt tcagttcaac
    54601 gtaagagaac caaggcgctg ggttattatc acgattgagc cactcctgcc attgtgtgat
    54661 gatggcatcg ccgctttgtt gctgcggcgc gggcaaggag aaatcagaaa gcagcgcctg
    54721 acggtagagc gggctgttga agccgttcgc cgaaaatagc ccaaactggt aaccttgctg
    54781 acttaatgct gcgatcaacg cagagggttt ccgcgcactc aggataccat ccatataggt
    54841 cgtcgagagg ccgtaaaaca gattaaacaa agcggcatct ggctgagagc ctgagtcgta
    54901 atgatcgctg aaatgcacgt tttctgcagc gaaacgcgac aggttcggca tccggttttt
    54961 tatggcgtca ggctgcgtat catcaatcat caccatcagc aggttatagc cgctaccact
    55021 atcacggaag gtgatgttat tgagcggata ctcgactgtc atcgcttcag gattaccctg
    55081 ctgcgtcagc cgacgctgat attcctgcgc atccagcagg ccatgttttt ccagaaaacg
    55141 tcgtgccgtc atcggataag atagcggtag attggcgcgc tgcatggtaa ttgggcggta
    55201 gaaattcgca tcggcccaga tatacatcag gtgtgacgcg aagaacgccg agatgaaaac
    55261 gcccgccagt ggtttgccaa aatgacgacg attcaggctg cgtaattttt gccagcacca
    55321 ggtgccgaat agcatctccg ccataaaaat caatggaatg ccgataaaca tccactgcca
    55381 atcgcgggca atctccccct gtcctgggtt gatgacgagt tcccaaacgg tgctgttaag
    55441 gtgcaggtga aaacgcgtaa aaacttcaac atcgactagc aatatcgtca gcccggccgt
    55501 tgccagcgcc gcagacagga accgtagcag gcgctgcgac atcacaatga acgtgagcgg
    55561 gaagatgacc agcagatagg cggcaaagac gataaaacta aaatgaccga gccagctaac
    55621 cagcgcataa attcggccga acagggaagt cggccaatcg gcaacaaaca ggtagcggct
    55681 acccagcccc aaagtgagca aaatgttgaa taaggcgaac cagtgtcccc aacttatcat
    55741 ctgggagacc ttttcgcggt agcgctgacg gttggttacc atacgttggc caaaacttag
    55801 tgagctttat cggctttttt aatcgaagcc tgtagggctt cagcgaaaga acgcgccaga
    55861 acctgacgtt gcgcaggtgc gatgctggtg ttaatcaggt tcgtcaccat attaccgagc
    55921 accatcaaag caagatcggt cggggcgtgg tgcttttcca gaacattgac catctcagaa
    55981 agcagttgtt caacgtgttc gtcactataa cgggatgatt gtggcataaa atggcgtatc
    56041 tcaagcaggt aaagtcgctt atcttaccgt ataggcttat gcttttctgc acttttatca
    56101 ttaatgcatt tttatcactg acgtgctttc atcaataaca acgagtgtag acgcttagcg
    56161 cgtacagatg tgacggcagc tttatgtatt gcggcctgcc cgtatcagtg tttgaatacg
    56221 cgccttgcca aaaggagagt ttatcatgag tctggatatc gcccagattg ccttgcatca
    56281 gctaattaaa cgtgacgaac aaacgctgga aatggtgttg cgtgattccc tgctgtcgac
    56341 caacgcggca gtagaagaaa tgatggctga actgcatcgt gtttacagcg ccaagagtaa
    56401 ggcctacggg ctgtttaatg agcaaagcga gctggccgat gcgctgcggg cttgtcgcaa
    56461 aggggatgag gactttctga gtttctcacg cgccgcgacc ggacgactgc gtgacgaact
    56521 ggcgaagtac ccgtttgctg aaggcggtat cgtgctgttc tgccagtacc gctatctggc
    56581 ggtcgaatat ttattgatat cggtgcttaa tagctgcaat agcatgcggg ttaatgaaca
    56641 gttggatatc agcactacgc attatctgga tatcaatcat gccgatatcg ttgcgcgtat
    56701 cgatctgaca gaatgggaaa ccaatcctga atccgcgcgc tatctgacgt ttctgaaagg
    56761 ccgtgtcggg cgcaaggtgt ctgacttttt catggatttt ttggccgcgt cagaagggtt
    56821 ggacaccaaa gcacaaaacc gtggcttgct gaaagcggtc gatgagtatt gtgatgaggc
    56881 acaactggat aaaaacgagc gccagaatta tcgtcagcag gtgtatagct actgtaatga
    56941 gcagttgcag tccggcgagg aaatcgagtt agcgtcgttg tcgcaggaac tgccaccgct
    57001 gggtgagaaa acctttcagc agttttcagc cgatcagggc tatgagctgg aagagagctt
    57061 ccctgccgat cgtgggacac tgcgtcagtt gaccaaattt gctggcagcg gcggtggcat
    57121 cagcctgaac tttgatgcgt tattactcgg tgagcggatt ttctgggatc cggcgacgga
    57181 tacgttgacg attaaaggca cgccgccaaa cctgcgcgat cagttacagc gtcggacgag
    57241 tggtggtaag cagtagaaag agatccagcc ctttttttat tactcagaaa aagggctgtt
    57301 gctgataaca attagaaata tttaagccag cggatgtctc ggcgacgggc ttttaagcgt
    57361 gcaaacgccc ggacgggcga aaatagcacg gccatcagta ccagagtaca cacccacagt
    57421 tgccagacgg cggaaaaacc gaaccactcc ccctgattct tcccccagat tgctaccgta
    57481 gttaaatata tgccttttaa aacatacaga tgcagtagat agaaaaacat tggcgcagcg
    57541 ccgaagctcg ctaacataac aagccaatgc ttttgctgct gacgttcaaa cagggcgagc
    57601 aggccaaacc cgataccaag cgtcaggcag ataaacaaca atgatggcgg gtatttcgtg
    57661 atgttgaaat agctcatgag cgtctgagtg atgacatcac ccggcagcca gggtttatcg
    57721 ccatacaaat tgatgctgcg caatatgaag aacagcgtta gcgtgattcc ggccagagcg
    57781 agtagggttt tctggcgctg aagcggaaag atgtcttttc ggtatagcgc gccagccgca
    57841 tagccaagtg aaatgacgcc aatccaggga agcactggat atgaagtacg catacgcaat
    57901 gtttcgctga tttctatcca actgcgatcg tgcaaaatag cccagggaat cgaccagatg
    57961 gaacctgcgg aagcatgcag agagtccagc agattatgcc cgccgacgat aacgagaccc
    58021 aatatgaaaa ccagtctggc aggtaaccag atcagcgcgc tgagggcgag catactcata
    58081 ccgatggccc agattacctg caaataaatg acctgcggtg ggaattgaaa cgtccatgcg
    58141 aaattgatta gcgtgatctc aagaacaatc agaattaagc cgcgttggaa cagaaagagg
    58201 gcggtttgcc gacgatcttg cactttctga tgataaagcg ccgcagagag gccagttaaa
    58261 aacacaaaca cgggggcgca cagatgggcc agcgtgcggt tgataaataa catgggatcg
    58321 gtgctggtga catctatggg atcggcaagc tggaggtgca gataaaaggt ttcccgcaca
    58381 tggtctagta gcataagtac catcaccaga ccgcgcaggg catcgatagc gataagccgc
    58441 tgagatatct ctcgagacat gttcacattc ctttgtgaat gaatagattt ttataaaaaa
    58501 aacgccgcat aggcggcgtt cttctttccc ggcgtcccgg aaaacgactt cagcgcaaac
    58561 taaacgcgaa cgaagtcgat gtgagtcagt ttaggcttgt aaacgtgacg ttgtacagcc
    58621 tgaactttaa cttgaacttc tttgccatcg atagacagga tcagtgtttc accgtagaag
    58681 ccatctttaa cttcttggtt tttcactgaa tcgtgatcca gttcgataga gactggtgct
    58741 tctgaaccac cgtaaacgat ggctgggaat ttaccagcgg aacgcaggcg gcggctcgca
    58801 cccttaccct gaccttgacg tgcttctgct ttgatagtaa tcattttctt ctctacttat
    58861 ataaagtaat cctgctacag gcgacccagc agcaggttgg gttattcagc ttctgcgaac
    58921 aaaagcgggc taaattctag cggaatatgg cttcatgggc aaatgaatcc ggacattact
    58981 cgtcatactt caagtttcat gtgcgttggc agcgttctgt cacccgaatc acttaccaga
    59041 gtaagctcat cgggattccc tcacttgccg cctgcctgaa actcgaatta tttagagtat
    59101 accttagccg cggatctcgt tggcgcggcg aaagcggccc tgataatcaa agagcttttc
    59161 gcgtatttgc cagaatttcc cgtttttacg ggcgacgaca aaatcagggg cgcgtaataa
    59221 tatctgctgt gcgatgacat cggcggcatt ctgccagtta aacggcgttc ccggcgcgcg
    59281 ttgatgaaca cgtaaaaatt gttgcagaaa cacgtggcgc tgcgcggtgg agtgtaggcg
    59341 aaaacgttcg ctcacttcgg caccttcttc atcatgatag gtgattttca gccattctcc
    59401 tttagcgtcc tgtccctgct cgaagctcat gccgctacag cgtaaaacca acgcatcttt
    59461 caactttagc gctgctttta gcatgtcatc ggggtcaact aatacttcat tacattggtg
    59521 gcagcgccgt gcggcaatat cgttttccgc accgcagtgt gggcagactt taaaccgaaa
    59581 tcgaaaatca cactgctgac gttgcccatt ttctgccatt tcccagccct gacagcgccg
    59641 gccatagtgt tcgatgatat cgccatcggg agtggttttt ccccagaaca gattggcaaa
    59701 accgcattca ggacagaaga cttgcaccgg ctggctgcca gcatgcggct tgctgttgcc
    59761 gacttctggc gtatagagat cgtgcgggtt gcctgcgtaa tctagtatca ggcagtccgt
    59821 tttccccgga tataaacgca aaccgcgccc gacgatttgc tgatacaggc tgactgactc
    59881 tgtcgggcgg agaatggcaa taaggtcgac atgcggagca tcaaaacctg tggtcagtac
    59941 tgccacgttg accagatagc gcaacgactg ctgcttaaag gcgtcaatca acgcatcacg
    60001 ctcggcaggt ggcgtatcgg cactgaccag cgccgcttga cccgcgggta acagagctgc
    60061 aatctcttta gcatgttcga cggtggaggc aaaaatcatc acgccgcgcc gtgtttgcgc
    60121 ataatcgatg acctggctaa tgatgtgcgg cgtaatgcgc tgctggcgtt tgagttcgag
    60181 attcaggtca gcttcgctga atagcccgtt gctgcgggca acaagtttgc tgaaatcata
    60241 ttgcaccacc ggcatatcca gccgatcagg cggtaccaga aagccatgct tgatcatata
    60301 gcgtagcggt aactcataga tgcagtcgcg gaacaaacaa cgctcgtcgc cgcgcatcat
    60361 gccgtgatag tgatactgat agatccagcc tttgccaagg cgatagggcg tcgccgttag
    60421 gccgagtagc cttagccgtg ggttagtttt ttgcagatgc tggatgattt gttgatattg
    60481 gctgttatcg gcatcgctga tgcggtgaca ttcatcaatg atcaacagag agaatgcgtt
    60541 atcaaactgg tcgagattac gtgcaacgga ctgtacgctg ccaaaaacca cttttccctg
    60601 actttcgcgc tgttgcagcc ccgcagcgaa gatatccgct gccaaatccc aggcgcagta
    60661 tttggcatga ttttgcgcca ccagttcctt gacgtgtgcg agcactagca cacggccgcg
    60721 tgctagccgt gccagttcgg cgatgaccag acttttccct gcgccagtag gcaaaacgat
    60781 gacggccggt tgggtatgat ggcgaaaata gtcgagcgtg gcggaaactg cctcacgttg
    60841 gtaaggccgt agtgtgaatg acatcgctag tgctggcaga ttttactggc gctggtggtg
    60901 aaccctgcat cctgcgggat aaactttccg cgttcagaca gaaattgcac cagcattgaa
    60961 gccgtcatgt tttcggcgga acaggtatgg aaacgcgctg cgctgccgaa acgggtttct
    61021 atggtggtaa ttaactgctc ggtggtaaat gattcaccag acgcgagcat catttgcaaa
    61081 acttcatgac cgtgaataga tgacatgggg ttgtccttaa aatgtaagaa attgccccta
    61141 ttatgcctgt tgaacatacc cagcgcgagg gactctcagc ctgaaaatgg gctaaaagag
    61201 cggcgcg
//
