# Supplementary material for: May the Phage be With You? Prophage-Like Elements in the Genomes of Soft Rot Pectobacteriaceae: Pectobacterium spp. and Dickeya spp
Source: Front Microbiol. 2019 Feb 14;10:138. doi: 10.3389/fmicb.2019.00138 (PMC6385640; doi:10.3389/fmicb.2019.00138)
Supplement: Supplementary file 2 [file Data_Sheet_2.ZIP › Supplementary_prophagesGENBANK_files/Genbank FILES _SRP_prophages/phiPwa2.gb]

LOCUS       Exported               51892 bp ds-DNA     linear   UNK 02-AUG-2018
DEFINITION  phiPwa2.
ACCESSION   .
VERSION     .
KEYWORDS    .
SOURCE      phiPwa2
  ORGANISM  phiPwa2
REFERENCE   1  (bases 1 to 51892)
  AUTHORS   .
  TITLE     Direct Submission
  JOURNAL   Exported Aug 2, 2018 from SnapGene Viewer 4.2.3
            http://www.snapgene.com
FEATURES             Location/Qualifiers
     source          1..51892
                     /organism="prophage phiPwa2"
                     /mol_type="genomic DNA"
                     /note="/genome_id=6666666.356865"
                     /note="/genome_md5="
                     /note="/project=robertczajkowski_6666666"
                     /db_xref="taxon:6666666"
     CDS             29..1030
                     /codon_start=1
                     /product="Zinc ABC transporter, periplasmic-binding protein
                     ZnuA"
                     /label=Zinc ABC transporter, periplasmic-binding prote
                     /db_xref="SEED:fig|6666666.356865.peg.1"
                     /db_xref="GO:0005488"
                     /translation="MQQSIQQKKWLKSVFVASALLAGGMSISAASAAVITSIRPLGFIA
                     SAIADGVTPTEILLPDGASPHDYALRPSDVQRLQSADLVIWVGPEMEAFLGKPLAKISS
                     TKQIALSALPGIKSELEKEAGHDHEDNHEQAHDEHEKGHEHSHAAHDDGDDGHHHGEYN
                     MHIWLSPEMTKQAAIAIHAKLLELMPQNKDKLDANLLYFTDKIAQADEKIVKMLAPVQG
                     RGYFVFHDAYGYFEKHYGLSPLGYFTVNPEIQPGAQRLHQIRTQLVEHKAVCVFAEPQF
                     RPAVINAVAKGTDVRSGVLDPLGSNIALGRDSYADFLLQLSNQYVSCLEGKL"
     CDS             1043..2368
                     /codon_start=1
                     /product="Cell wall endopeptidase, family M23/M37"
                     /label=Cell wall endopeptidase, family M23/M37
                     /db_xref="SEED:fig|6666666.356865.peg.2"
                     /translation="MQQIVRTIALAYNSLPRPHRVMLGSLTVVTLAVAVWRPFVYPHVD
                     DAPVIVKDIDLETSQLRTLTPEASEPIDQPSPDDDIPQDELDEDKGADEGSVHEYVVST
                     GDTLSSILTQYGIDIADVTQLAEQNKDLRNLKIGQQISWALSENGDLQSLTWQMSRRET
                     RIYERVGTDFKERIETLKGEWRNSVLNGRVSGSFVSSAKNAGLTSAEVRDVIKALQWQL
                     DFRKLRKDDTFSVLMSREMLDGKSEQSELVGVRLNTGGKDYYAIRAEDGKFYDREGSGL
                     TRGFMRFPTMKQFRVSSNFNPRRLNPVTGRVAPHKGVDFAMPVGSPVLAVGDGEVVIAK
                     RSGAAGNYVVIRHGRQYTTRFMHLNRILVKPGQKVKRGDRIGLSGNTGRSTGPHLHYEL
                     WVNQQAVNPLTAQLPRSEGLAGKDRRDYLAQVKEVVPQLKFD"
     CDS             2419..3522
                     /codon_start=1
                     /product="Lipid A biosynthesis (KDO) 2-(lauroyl)-lipid IVA 
                     acyltransferase (EC 2.3.1.-)"
                     /label=Lipid A biosynthesis
                     /db_xref="SEED:fig|6666666.356865.peg.3"
                     /db_xref="GO:0008415"
                     /db_xref="GO:0009244"
                     /db_xref="GO:0016021"
                     /translation="MAHGFLVFCYRADVFLHHCRWMLLNAERPLCLCLLIDLKSLGMEK
                     EKKSNAEFIPQLQRAFFHPRYWGVWLGVGVMALAAYIPARLRNPVLGGLGRFVGRISKG
                     ARRRARINLLYCMPELTEAQRETIIDDMFATAPQSMIMMVEVGIRNPKTIEKYVRWHGE
                     DILERIKAQEKNVIFLVPHGWGVDIPAMLLTSRGQRMAAMFHNQKNELVDYWWNRLRRR
                     FGGRIHARNDGIKPFISSVRSGCWGYYLPDQDHGPEHSEFVDFFATYKATLPAVGRLMK
                     VCRADIVPLFPVYNAKDGCLDVYIRPPMVDLAEADDAYIARRMNEEVEILVRPNPEQYT
                     WILKLLKTRKPGEIEPYCRDDLYRDKK"
     CDS             complement(3634..5076)
                     /codon_start=1
                     /product="Pyruvate kinase (EC 2.7.1.40)"
                     /EC_number="2.7.1.40"
                     /label=Pyruvate kinase
                     /db_xref="SEED:fig|6666666.356865.peg.4"
                     /db_xref="GO:0004743"
                     /translation="MSRRLRRTKIVTTLGPATDRDNNLEKIISAGANVVRMNFSHGTAE
                     DHQLRANKVREIAAKLGRHVAILGDLQGPKIRVSTFKEGKIFLNIGDKFLLDANLAKGE
                     GDKERVGIDYKGLPSDVVPGDILLLDDGRVQLKVLQVEGLKVYTEVTVGGPLSNNKGIN
                     KLGGGLSAEALTEKDKADIITAAKIGVDYLAVSFPRTGEDLNYARRLARDAGCNAKIVS
                     KVERAEAVCSDAAMDDIILASDVVMVARGDLGVEIGDPELVGIQKKLIRRARQLNRAVI
                     TATQMMESMITNPMPTRAEVMDVANAVLDGTDAVMLSAETAAGQYPAETVAAMAKVCLG
                     AEKIPSINVSKHRLDVQFDNTEESIAMSSMYAANHLKGVTALIAMTESGRTALMMSRIS
                     SGLPIFAMSRHEHTLNLTALYRGVTPVHFDSYTDGVAAANDAVIRLRDKGFLMSGDLVI
                     VTQGDIMGTVGTTNTIRILRVE"
     CDS             complement(5470..6393)
                     /codon_start=1
                     /product="Phosphogluconate repressor HexR, RpiR family"
                     /label=Phosphogluconate repressor HexR, RpiR family
                     /db_xref="SEED:fig|6666666.356865.peg.5"
                     /translation="MPVVPLVEIGKNLHGPCRMNMLEKIQSHLDLLSKSERKVAEAILS
                     TPQTAIHSSIATLAKMADVSEPTVNRFCRRLETKGFPDFKLHLAQSLANGTPYVNRNVE
                     EDDSVDAYTSKIFESAMAGLEQVKSSLDVAAVNRAVDLLTQAKKISFFGLGASAAVAHD
                     AMNKFFRFNIPVVYFDDIVMQRMSCMNSSDGDVVVLISHTGRTKSLVEMAQLARENDAT
                     VIAITSDGTPLAREASLALRLDVPEDTDVYMPMVSRIAQLTLIDVLATGFTLRRGEKFR
                     DNLKRVKEALRESRFDKDERLINPFR"
     CDS             6553..6672
                     /codon_start=1
                     /product="hypothetical protein"
                     /label=hypothetical protein
                     /db_xref="SEED:fig|6666666.356865.peg.6"
                     /translation="MIPATAQTDLCVVFSQYHPLFGIFMMGLLAVVKKSTLWL"
     CDS             6707..8182
                     /codon_start=1
                     /product="Glucose-6-phosphate 1-dehydrogenase (EC 
                     1.1.1.49)"
                     /EC_number="1.1.1.49"
                     /label=Glucose-6-phosphate 1-dehydrogenase
                     /db_xref="SEED:fig|6666666.356865.peg.7"
                     /db_xref="GO:0004345"
                     /translation="MAVTSTAQACDLVIFGAKGDLARRKLLPSLYQLEKAGHIHADTKI
                     IGVGRADWDKAEYTRVVREALDTFMKEAIDDKLWETLSGRLDFCNLDVEDTKAFNKLGK
                     MLDQKNRTTINYFAMPPSTFGAICKGLGTAGLNKDPARVVMEKPLGTDLASSRVINDQV
                     AEFFNECQVYRIDHYLGKETVLNLLALRFANSLFSSNWDNRTIDHVQITVAEEVGIEGR
                     WGYFDKAGQMRDMIQNHLLQILTMIAMSPPSDLTTDRIRDEKVKVLRSLRRIDRSNVHE
                     TTVRGQYSSGFVQGHKVPGYLEEEGANKSSSTETFVSIRVDIDDWRWSGVPFYLRTGKR
                     LPTKCSEVVVYFKNPALNLFHDSYQQLPQNKLIIRLQPDEGVEIQILNKIPGLEHKHRL
                     QTVKLDLSFSETFNQQHLADAYERLLLETMRGIQALFVRRDEVEEAWKWVDSIMEAWAM
                     DNDAPKPYQAGSWGPVASVAMITRDGRSWNEFE"
     CDS             8349..8990
                     /codon_start=1
                     /product="4-hydroxy-2-oxoglutarate aldolase (EC 4.1.3.16) @
                     2-dehydro-3-deoxyphosphogluconate aldolase (EC 4.1.2.14)"
                     /EC_number="4.1.2.14; 4.1.3.16"
                     /label=4-hydroxy-2-oxoglutarate aldolase
                     /db_xref="SEED:fig|6666666.356865.peg.8"
                     /db_xref="GO:0008675"
                     /translation="MKNWKTSAEQILTTGPVVPVIVVNKLEHAVPMAKALVAGGVRVLE
                     LTLRTDCAIDAIRAIAKEVPEAIVGAGTVTNPEQLAAVVEAGAQFAISPGLTEPLLKAA
                     SAGNIPLIPGISTVSELMLGMDYGLREFKFFPAEANGGVKALQAIAGPFAHIRFCPTGG
                     ITPNNYRDYLALKSVLCVGGSWLVPNDALESGDYARITELAREAVAGAKA"
     CDS             complement(9170..10348)
                     /codon_start=1
                     /product="Phosphoribosylglycinamide formyltransferase 2 (EC
                     2.1.2.-)"
                     /label=Phosphoribosylglycinamide formyltransferase 2
                     /db_xref="SEED:fig|6666666.356865.peg.9"
                     /translation="MLTIGTALRADATRVMLLGSGELGKEVAIECQRLGIEVIAVDRYA
                     DAPAMQIAHRSHVINMLDGDALKALVEAERPDYIVPEIEAIATDMLVTLEKQGHHVVPC
                     AEATRLTMNREGIRRLAAETLGVPTSTYRFADSEERFYQAVEAIGYPCIVKPVMSSSGK
                     GQSLIRSAEQLEQAWSYAQQGGRAGSGRVIVEGLVNFDFEITLLTIHAVDGIHFCAPIG
                     HRQEDGDYRESWQPQQMSELALDRAQKMASDVVKALGGYGLFGVELFVCGDEVIFSEVS
                     PRPHDTGMVTMISQDLSEFALHVRAFLGLPIGVVRQYGASASAVILPELESNNVRYQGL
                     ESALLPHTQIRLFGKPDISGKRRMGVALASAETTDDAVEIAKRVAAGVKVSG"
     CDS             10511..12598
                     /codon_start=1
                     /product="Protease II (EC 3.4.21.83)"
                     /EC_number="3.4.21.83"
                     /label=Protease II
                     /db_xref="SEED:fig|6666666.356865.peg.10"
                     /translation="MNFYVKTTRSDAMKTPQAEKKPHAISTHGDTRIDNYYWLRDDQRT
                     DPQVLAYLEQENAYSEAIMAPHEVRKRSLYDEMVKRIPSTDMSVPYVRKGYRYQSRYEP
                     GKEYAIYLRQPEHSTATWETLLDGNQRAEGHEFYSLGALEISPNNTLLALSEDFLSRRQ
                     YTLRFRDLNSGEWLPDVIENVTAGAEWSADSTVLYYVRKHEQTLLPYQVYRHRLGSDPA
                     QDELVYEEKDDTYYVSLSKTTSEHYITIYLSSTTTTEVLLLDATLPDAVPQVGIPRRKD
                     HEYGIDHYQGRFYLRSNREGKNFGLYRSDKPDEQTLETLIAPREHRVLEGFELFRDWLV
                     VEERERGLTSLRQIHWHTQEEKTITFNDASYVAWLSYNPTSETALLRYGYSSMTTPSTL
                     YELNLDTGEQQRLKQAEVKDFSPDHYRSERLWITVRDGVDVPVSLVYHREHFTPGKNPI
                     LVYGYGAYGNSMEPDFSISRLSLLDRGFVFALTHIRGGGELGQQWYDDGRLLNKMHSFT
                     DFIDVSQALIEKGYGDRENMFAMGGSAGGLLMGAVVNMAPDLFKGVVAQVPFVDVLTTM
                     LDESIPLTTGEYDEWGDPNEQTYYDYIKQYSPYDGVTAQRYPHLLVTTGLHDSQVQYWE
                     PAKWVAKLRDVKTDDRLVLLYTDMDAGHGGKSGRFKRYDDIALEYAFLLMVLEKAAEGH
                     E"
     CDS             complement(12953..13183)
                     /codon_start=1
                     /product="DNA polymerase III theta subunit (EC 2.7.7.7)"
                     /EC_number="2.7.7.7"
                     /label=DNA polymerase III theta subunit
                     /db_xref="SEED:fig|6666666.356865.peg.11"
                     /db_xref="GO:0003887"
                     /translation="MGHNLAELSKEDMDKVNVDLAASGVAFKERYNMPVIPEVVEREQP
                     EHLRNYFRERVTFYRQRSLQFSRLPYEPKSK"
     CDS             13555..14061
                     /codon_start=1
                     /product="Ferritin-like protein 2"
                     /label=Ferritin-like protein 2
                     /db_xref="SEED:fig|6666666.356865.peg.12"
                     /translation="MLKKEMIQKLNEQLNLEFYSANLYLQMSAWCGDKGFEGASSFLKT
                     HSQEEMQHMQRLFDYLDDTGSLPVLGAIAAPPIDFDSLADVFKLTYEHEQLITAKINEL
                     AHAAMALQDYSTFNFLQWYVAEQHEEEKLFRSILDKLALVKASEGGLFFIDQDLKKMST
                     AAPSA"
     CDS             14266..14697
                     /codon_start=1
                     /product="Uncharacterized protein YebY precursor"
                     /label=Uncharacterized protein YebY precursor
                     /db_xref="SEED:fig|6666666.356865.peg.13"
                     /translation="MRSFSDLDKAAKLTHHCLNTHVGNTMMKKFLLSIVLTSLSVNAFA
                     AAKLANISRLEYGDRWAFTREEVQLICRPGNALYALHTGTLMQYPLNDTAIAQMKSGQV
                     SAQPIDVIWLDDPKHPGQKKSLQPFIDRAEQLCLPDGQP"
     CDS             complement(15005..16060)
                     /codon_start=1
                     /product="Phage integrase"
                     /label=Phage integrase
                     /db_xref="SEED:fig|6666666.356865.peg.14"
                     /translation="MTIRKLPTGKWLCECYPNGREGKRVRKQFSTKGEAVSYEQYVMEQ
                     TKLKPWLGEKEDRRKLNELIDLWYKLHGCSLNDKKGRLGKLKIICNGLGNPIASSLTAK
                     DWAHYRDLRLQGAIDNGYSTSLETRKVSTGTINCEHAFLRAVFNELKRLGEWELPNPLE
                     NVREFDQPEREMAWLTSEQITQLLVACENHKNEELTLIVKVCLSTGSRWNEAAKLKSSQ
                     LSPYKITFINTKGKKNRTVPISDQLYQELISRNGKPFSPCYKQFYRVVRMAGIELPEGQ
                     MTHVLRHTFASHFMMNGGNIIVLQRILGHSDIRVTMRYAHFAPDHLEDAIRLNPLASAI
                     GDKKAADYVIG"
     CDS             complement(16501..17646)
                     /codon_start=1
                     /product="Gene D protein"
                     /label=Gene D protein
                     /db_xref="SEED:fig|6666666.356865.peg.15"
                     /translation="MYRQAVKPPPAYLLRLNEQDITTVISPRLLSLSLTDNRGFEADQL
                     DIELDDSDGLLQLPRRGAVLSVFLGWEGDALIGKGDFTVDEIEHRGTPDTLTIRARSAD
                     FRGSLNSRRELSYHDTTLGAIVEQVAKRNNLAPMLADGFAGIKIPHIDQTLETDAKFIT
                     RLAERNGAIVAIKAGRLLFIRPGTGKTASGKLIPQQMIERSDGDQHSFSLADRGAYTGV
                     TASWLHTKEPQPEKPKMVKVKRQKKVLLHQGAQPQKPHPKAKKAKKKPEAREGDYLVGT
                     DENVLALTTVFATKAQATRAAQAKWDKLQRGVAEFSITLAMGRADLFPETPVQVSGFKQ
                     VIDEQPWTISKVTHSLSNSGYVTALELEVLLSEAEYGISEQ"
     CDS             complement(17659..18144)
                     /codon_start=1
                     /product="Phage tail protein"
                     /label=Phage tail protein
                     /db_xref="SEED:fig|6666666.356865.peg.16"
                     /translation="MMLTLGLFVFQLQTLPYQNMQRNVEYRWPSNNRVGQRPAFQFLGV
                     EEEKITLSGALLPEITGGTLSLLMLETMADQGRAWPLIEGSGTIYGVFVVNSISQTKTE
                     FFPDGRARRIEFTVTLTRVDSSLSAVLGDLRQQAEGLIGSAGEMANKAQAAIGGLFA"
     CDS             complement(18146..20866)
                     /codon_start=1
                     /product="Phage protein"
                     /label=Phage protein
                     /db_xref="SEED:fig|6666666.356865.peg.17"
                     /translation="MLRAVDQATRPFRAVQNAARTLSGEIQGSQTQLKTLEAQAKRIEG
                     FRKTSAQLASTGRALEKAKADAAALAVAFRNTANPTRAQTKALEEARQKAAELQTQQNR
                     LRLSVQNQRSALRAAGIDTRNLSAAERQLRTNIAGATDTLNRQRAALARVSQQQEKLNA
                     VNKRYEQGKAITAGVRNTGAAAFGLGSAALYAESRLIAPSVEADGHGARIAAQTGGNAA
                     DGKQYTRIIKEVNASGVSNDLTQIADAVAAVRSTLGTLGDVGETELTRISRKALDMQAA
                     LGGEATESIQIAAIMMKNGLAKNSDEAFDLMVSGMQRVSAQMPGELPEILHEYSTHFRN
                     MGFSGSEAMTLLVEMAQQGKFALDKTGDAVKEFSIRGSDMSKASIEAYDAAGLNAAKMS
                     TAIASGGDKARVAMQKTATGLLKIKDPAERANAAIALFGTPIEDLSIDQIPKFLTALAG
                     TENKLGDVSGAADRMGDTLRDNLEGDIGRLRGAMASLRFNLFNDDDGILRKLTQSATAW
                     LNRVNEWVKANPELAHQIVMVAGAATALITVLGGIGLVAWPVMGGINALVAGAGFLSAG
                     FGALGNPLTVIRGAMSGFGRVLMWLFTSPLALLRTGFMFIGSALGVLLSPVGLVVAAIV
                     GGALLIWKYWEPIKAFIGGVVEGFVAASAPIIAAFEPLQPVFTWIGDKIKALFGWFGDL
                     LTPVKSTAAELDGAANMGKRFGEMLANGLDIATIPMKSLISGVSWLLEKLGLVDEKSKK
                     LPTAENIMPPKEAAALQAGVSNAPTPQGNDAKAIEARYSGVRDNGGGIKLGEFAVVGEH
                     GPEIVEGPVNVTSRRHTAAMASAAMNMSAYRPIAPPVQASTASSPISIHAPISIVAQPG
                     QSAQDIAQEVTRQLEQRERAARSRAFSQYSYQGGE"
     CDS             complement(20886..21005)
                     /codon_start=1
                     /product="GpE+E'"
                     /label=GpE+E'
                     /db_xref="SEED:fig|6666666.356865.peg.18"
                     /translation="MADIAVIFHWPPSELYPMSLTELILWRDKALKRSGHANE"
     CDS             complement(21020..21316)
                     /codon_start=1
                     /product="GpE+E'"
                     /label=GpE+E'
                     /db_xref="SEED:fig|6666666.356865.peg.19"
                     /translation="MNKDDNVVTLETPIKRGDTLIETVTLIKPTAGTLRGVSLAALAGS
                     DVDAMIKVLPRMTLPALTEAEITRMELPDMIAIAGKVIGFLTPKSQQETYPEA"
     CDS             complement(21384..21905)
                     /codon_start=1
                     /product="Phage major tail tube protein"
                     /label=Phage major tail tube protein
                     /db_xref="SEED:fig|6666666.356865.peg.20"
                     /translation="MALPRKLKMMNLFNAGMSYMGVATAVTLPKLTRKLENYRGAGMPG
                     SAPIDFGLDDDALAMEFTLDGFADETLWSQYAAPGIDAVLLRFSGAYQRDDTGEVAAVE
                     VVMRGRHKEIDGGESKEGEDTETKISTQCTYYKLTIDGKEMIEIDTINMIERVMGVDRL
                     EQHRRAIGLV"
     CDS             complement(21918..23096)
                     /codon_start=1
                     /product="Phage major tail sheath protein"
                     /label=Phage major tail sheath protein
                     /db_xref="SEED:fig|6666666.356865.peg.21"
                     /translation="MSLMSDFHHGVQVVEVNDGTRVISTVSTAIIGMVCTAPDADAATF
                     PLNTPVLITNVLSAAGKAGKKGTLAAALLAIADQSKPVTIVVRVAEGKDEAETISNVIG
                     GSDENGKYTGMKALLDAMSVTGVKPRILGAPGLDSLPVATALASICQSLRAFGYVSAWG
                     CKTLSDAINYRENFNQRELMVIWPDFIAWDTTANASTTAYATARALGLRAKIDQDTGWH
                     KTLSNVGVNGVTGISASVYWDLQAPGTDADLLNQAGVTTLVRKDGFRFWGNRTCSDDPL
                     FLFENYTRTAQVLADTIAEAHMWAVDKPVTPTLIKDIIDGIKAKFRELKTGGYIIDADC
                     WFDETANDKDTLKAGKLYIDYDYTPVPPLENLTLRQRITDKYLVNMAASVNS"
     CDS             23640..24068
                     /codon_start=1
                     /product="Acetyltransferase"
                     /label=Acetyltransferase
                     /db_xref="SEED:fig|6666666.356865.peg.22"
                     /translation="MTYDNDFVIKSGIKGCEEFDDKLPLPIIGHDVWIGGNVVLKGGIT
                     IGHGAVIGANSIVTKDVPPYAVVAGIPAKIIRFRFENDIIHKLLELEWWNYKPSDIPAH
                     EKSIGEFIKAIETSVGSNEIKPHEYKKINLSEIFKSLC"
     CDS             complement(24100..24312)
                     /codon_start=1
                     /product="hypothetical protein"
                     /label=hypothetical protein
                     /db_xref="SEED:fig|6666666.356865.peg.23"
                     /translation="MIKINAEKHRQFLAGQVRKQRDERLSSSDGKMATDSPFDKAAWST
                     YRQNLRNITEQEGFPEKIIWPIEPR"
     CDS             complement(24299..24520)
                     /codon_start=1
                     /product="hypothetical protein"
                     /label=hypothetical protein
                     /db_xref="SEED:fig|6666666.356865.peg.24"
                     /translation="MIRVIYQGDDGVAILDPNTGFGLSATDIGKKDVPVGVPFWVMDIS
                     AFMDSPVESWEIDTTVAPSGIGGTYDQD"
     CDS             complement(24517..26124)
                     /codon_start=1
                     /product="Phage tail fibers"
                     /label=Phage tail fibers
                     /db_xref="SEED:fig|6666666.356865.peg.25"
                     /translation="MSATYFALLTNIGAAKLANATTLGSSLNITRMAVGDGGGSLPVPN
                     PAQTTLINEKRRAALNTLSVDPKNPSQIIAEQVIPENEGGFWIREIGLFDDDGNLIAVA
                     NCPETYKPQLQEGSGRIQTVRMILIVSSTDAVTLKIDPAVVLATRGYVDEVIEAHEKSR
                     QHPDGTLTVKGFVQLSSATNSDSEVLAATPKAVKAAVDNANGRVPSGRKVNGKALTADI
                     TLGAGDVGAYTKLETDTAVSVVAVTANNAAAAAASANTNANGRVPSGRTVNGKALSADI
                     TLSAGEVGAYTKAETDTRVAAATTAANNAATAATNANTNASGRVPSGRAVNGKALSADI
                     VLGAGDVGAYTKAETDTRVAAATTAANNAATAAANANTNANGRVPSGRTVNGKALTADI
                     TLGAADVGAYTKAEADSKVSVALSGKQNCTAWVNFGGVNSATIRDSYNVSSVVRESTGI
                     YTINFATPMKNNNYAVLCGIGDGAYTGNGGAAILNNSNSGLGDATKKDINSVRVIVRGG
                     NGTFDTTQCSIAIFGGAS"
     CDS             complement(26121..26732)
                     /codon_start=1
                     /product="Tail protein I"
                     /label=Tail protein I
                     /db_xref="SEED:fig|6666666.356865.peg.26"
                     /translation="MSDNRLLPVGSSVLEVVAAKACAEITRVPVPLRLLWNPDTCPAHL
                     LPYLAWAFSVDRWDEAWPESVKRQVIRDAFFIHRHKGTIGALRRVVEPFGYLIRISEWF
                     QNGGEPGTFRLDIGVQDSGITEETFYELERLIADAKPASRHLLGLNINLDTQGAAYVAA
                     TVYGGDDLTVYPYFPESITVSGLDVTGAALHLIDNMSVTA"
     CDS             complement(26725..27633)
                     /codon_start=1
                     /product="Phage baseplate assembly protein J"
                     /label=Phage baseplate assembly protein J
                     /db_xref="SEED:fig|6666666.356865.peg.27"
                     /translation="MAMIDLSQLPAPAVVEELDYETIYTERKAMLLSLYPEDQRAAVAR
                     TLTLESEPLVKLLQENAYRELLWRQRVNEAARAVMVAFAQGGDLDQLGANFSVSRLVIT
                     PADNSTLPPTPALMESDSDSRLRIQQSFEGLSVAGSVGAYQYHGRSADGRVADVSVISP
                     SPASVTVSVLSREGNGSASQELVAIVAAALNGEDVRPVADRVTVQSAVIVAYEIDATLY
                     LYPGPEKEPVRAAAEQKLKAYVSAQHRLGRDIRRSAIYAALHVEGVQRVELTTPAADIV
                     LTDAQASYCSGYRLGVGGADE"
     CDS             complement(27638..27979)
                     /codon_start=1
                     /product="Phage baseplate assembly protein W"
                     /label=Phage baseplate assembly protein W
                     /db_xref="SEED:fig|6666666.356865.peg.28"
                     /translation="MTTYSGMSRDNGQTLGDLEHIRQSVRDILITPVGSRVMRRDYGSL
                     LSVLIDQPQNPAVKLQVMAACYMALLRWEPRITLTGINLSSTFDGRLTVDITGVLADSN
                     AVSLSVPVS"
     CDS             complement(27976..28692)
                     /codon_start=1
                     /product="Phage baseplate assembly protein V"
                     /label=Phage baseplate assembly protein V
                     /db_xref="SEED:fig|6666666.356865.peg.29"
                     /translation="MVLFVPEVTHRKSIVVISQHNHSICMKTQATLTEIQRLLRNLIRV
                     GVVTHVNTKDALCRVQTGDMTTDWLNWLTRRAGRSRDWWAPSIGEQVLILSIGGELDTA
                     FVLPGIYSDANPAPSASADAYHVSFPDGAVIEYEPATGALTVNGIKTADITASESLIAT
                     VPLVTVRASTRITLDTPEVVCTNKLITGTLEVQKGGTMRGTVQHSGGAFTSNGVQVDNH
                     GHGGIMPGSGWTVGTK"
     CDS             28720..29337
                     /codon_start=1
                     /product="hypothetical protein"
                     /label=hypothetical protein
                     /db_xref="SEED:fig|6666666.356865.peg.30"
                     /translation="MTRTDLLKFYEKIYFHEAELREKLYVRIQIVFAFYVFIVTSAIYI
                     IRNIDYSGGALAIAALILSVICCIVMAVSIFYLKRAFWGNEFKVISTPEEISRHLENLK
                     EHKVKLEEYNAMYAYNKQKIINPEDGLDNFIFERLQRCSSHNMLINEWRSSQIHQSVYY
                     FFLSLIPLLFSAVVFIGFDLDLSSSQKSKKTEIIVITNSKLI"
     CDS             complement(29612..30061)
                     /codon_start=1
                     /product="Phage tail completion protein"
                     /label=Phage tail completion protein
                     /db_xref="SEED:fig|6666666.356865.peg.31"
                     /translation="MNELKPFDDKLAALIASLSASGRRKLAGTVAKALRGSQQQHIKAQ
                     TAPDGTAYAPRKAQPIKGKKGRVKRQMFQKLRTAKYLKAKGTADAASVEFIGRVQRMAR
                     VHHYGLRDRPSRNGDDVQYEARPLLGFSDREIKEVEGLLIKYLSR"
     CDS             complement(30054..30509)
                     /codon_start=1
                     /product="Phage tail protein # FIG072132 and FIG003673"
                     /label=Phage tail protein # FIG072132 and FIG003673
                     /db_xref="SEED:fig|6666666.356865.peg.32"
                     /translation="MLKPNSLRRALSDAVPVLKNNPDMLHVFIDSGAVVSTLAASLSFE
                     NQYTLNLVITDFTDDIDWLLVPIQAWLRENQPDIIHDSKGFTYIADINDNGSCDISISL
                     KLTERVIVKEVDKALHVTHAPEPPLPVPVERPVSLYLSGELVSTWHE"
     CDS             complement(30599..30985)
                     /codon_start=1
                     /product="Phage spanin Rz #LysB"
                     /label=Phage spanin Rz #LysB
                     /db_xref="SEED:fig|6666666.356865.peg.33"
                     /translation="MVTTGQLSEAEKTIDEQKDRLNKQSLELRVRDGVIDALQDTARRN
                     EQAQAALRTKLSQAGQLAASRDNKIMRLLNENADLRRWYGTALPDDVKRLHRRPAFDTP
                     DAYLRWLSEGNELPDTGQQPGNQR"
     CDS             complement(31036..31545)
                     /codon_start=1
                     /product="Phage lysin (EC 3.2.1.17) # Phage lysozyme or 
                     muramidase (EC 3.2.1.17)"
                     /EC_number="3.2.1.17"
                     /label=Phage lysin
                     /db_xref="SEED:fig|6666666.356865.peg.34"
                     /translation="MKSLVKRCVIATVLVLAVLVPDFSLLKTSQEGLALIADLEGCRLS
                     PYQCSANVWTNGIGHTAGVVPGKNITEREAAVNLVADVLRVEKALARCMAVDMPQAVYD
                     AIVSFAFNVGVGAACRSTLAFFINKGQWRNACDQLLRWVYVNGEVSRGIETRRQRERAV
                     CLQGAA"
     CDS             complement(31529..31738)
                     /codon_start=1
                     /product="hypothetical protein"
                     /label=hypothetical protein
                     /db_xref="SEED:fig|6666666.356865.peg.35"
                     /translation="MEKITSFIAYWISVALAFFGAMTPQDFAAYFGALGVVFTVGVNWY
                     YRRKSYQLLKTIDNPREVIHEITR"
     CDS             complement(31741..31944)
                     /codon_start=1
                     /product="Phage tail completion protein"
                     /label=Phage tail completion protein
                     /db_xref="SEED:fig|6666666.356865.peg.36"
                     /translation="MNVIAQQGDTLDALCYRHYGRTQGAVEAVLAANPGLAEFGAILPH
                     GTAVTLPDIAAAPVAETVSLWD"
     CDS             complement(31944..32447)
                     /codon_start=1
                     /product="Phage head completion-stabilization protein"
                     /label=Phage head completion-stabilization protein
                     /db_xref="SEED:fig|6666666.356865.peg.37"
                     /translation="MTTMIFPAKAEPRPDAVVIPVPTQQDAVIKNTFFWPDVEPGTLRT
                     LMRLENTVTPERLRHAALTAIAEVNAELFEYRKAQWAAGFTTLADVPAEQLDGQSEKHH
                     HYLRAVSSITTATLYERYRGYDASAKGDRKADALDGTIDELWRDARWAISQLQDAPRCI
                     IGHI"
     CDS             complement(32540..33199)
                     /codon_start=1
                     /product="Phage terminase, endonuclease subunit"
                     /label=Phage terminase, endonuclease subunit
                     /db_xref="SEED:fig|6666666.356865.peg.38"
                     /translation="MLSPAQRHMMRVSAAEASQRENDPLRQATGYEQMLFRLAADKRTL
                     KQVRSIERKAEMKSGLLPSYAPWVAGVLANGRGAQDAVLMTVMVWKLDAGDVPGALEIA
                     RYALQHKLVMPEGYTRPTPYLLAEEVADAATRAHTAGQAVNIDLLIDTLTLTDAEDMPD
                     QVRAKLHKIIGLILRSGKPEHALFHLKRAFQLDSRSGVKKDIERLETALRKAAASS"
     CDS             complement(33203..34318)
                     /codon_start=1
                     /product="Phage major capsid protein #Fam0066"
                     /label=Phage major capsid protein #Fam0066
                     /db_xref="SEED:fig|6666666.356865.peg.39"
                     /translation="MRKETRFKFNAYMTQLAALNGVEVETLSKKFSVEPSVTQSLMEVV
                     QESSDFLTRINIVPVAELTGEKIGLGVSGSVASTTDTSNGDERETADLLSLEARQYKCE
                     QMNFDFHIRYNTLDLWARFQDFQLRLRNAIAKRQSLDYIMAGWHGVKRAATSDRAKNPL
                     LQDVAVGWLQKYRNESAKRVMSKVVGEDGAVISEQIRVGENGDYASLDALVMDATNTMI
                     DEWHQEDPDLVVICGRQLLSDKYFPLVNKQQENSEILAADVIISQKRIGNLPAVRVPYF
                     PANALMITRLDNLSIYYMDDSHRRHIEEVAKRDRIENYESIKQDYIVEDYGCGCVIENI
                     QLGKFPEPPEAEKAAEPAASGTETSTDNAGA"
     CDS             complement(34368..35216)
                     /codon_start=1
                     /product="Phage capsid scaffolding protein # Fam Scf032"
                     /label=Phage capsid scaffolding protein # Fam Scf032
                     /db_xref="SEED:fig|6666666.356865.peg.40"
                     /translation="MAKKVSKWFGVEGDTCDGRIIDANDIQQMGEGFDPRVYGCRINIE
                     HVKGLLPDSPFRRYGDVVELKAEKIEDDSVLNGKLALFAKIDPTDELVAMIKARQKIYT
                     SMEIQPNFSNSGKSCLAGLAVTDDPASLGTEMLEFSAKAKHSPLAMRKSSPENLFSVAT
                     EVTLEFEDLPDVEPTLLTRVKALFGRKQSSDDARFNDVHEAVAEVAGQVQTNADGVEQR
                     FTQLEQRQQQDVATLTQKLSASEQKLSDLKATLDGTESLSQKRRPAATGGDGEASLLTN
                     C"
     CDS             35451..37124
                     /codon_start=1
                     /product="Phage terminase, ATPase subunit"
                     /label=Phage terminase, ATPase subunit
                     /db_xref="SEED:fig|6666666.356865.peg.41"
                     /translation="MLNQKTPTVQSWKQRDGWDAIAPVSRVEASLEARLIQLIMKTKKE
                     GHDYKEIDLLGRQIERLARVNRYSQTGNEADLNPNVRNRNKGERKAPEKNMFSDAVIDK
                     LNDIFLSEIFEYQRGWHQAGLQHRIRNILKSRQIGATFYFAREALIDALTTGRNQIFLS
                     ASKAQAHVFKNYIIDFARLVDVDLKGDPMVLPNGARLFFLGTNIRTAQSYTGNLYLDEY
                     FWIPKFQELRKVASGMSLHKKWRSTYFSTPSSLAHSAYPFWSGELFNKGRSNKADHLHL
                     DLSHANLSGGVLCGDGQWRQIVTVEDALAGGCNLFDLDQLTLEYSPAEYQNLLMCEFVD
                     DKASVFPFEELQRCMVDALEEWEDFNPYALRPFAYKPVWIGYDPSHTGDSAGCVVLAPP
                     QAPGGKFRILERFQWKGMDFAAQADAIKLLTEKYIVEYIGIDATGIGQGVYQLVRGFFP
                     AAREIKYSPEIKTAMVLKAKDTITSGRLEYDTSHTDITQSFMAIHKTMTASGNRTTYEA
                     SRSEEISHADVAWATMHALLNEPLTAINGHVPVSILDFNE"
     CDS             37121..37525
                     /codon_start=1
                     /product="Portal vertex protein"
                     /label=Portal vertex protein
                     /db_xref="SEED:fig|6666666.356865.peg.42"
                     /translation="MKKRKFRPSTSTSDNEPQPMQAFTFGEPSAVLDRRDILDYAECIQ
                     NGKWIEPPISFSGLAKSLRAAVHHSSPIYVKRNILVSTFIPHPLLSQQDFSRFVLDYLV
                     FGNAFLEKRLNRVGGYYGWSPARPNIPGAG"
     CDS             37546..38130
                     /codon_start=1
                     /product="Portal vertex protein"
                     /label=Portal vertex protein
                     /db_xref="SEED:fig|6666666.356865.peg.43"
                     /translation="MQSFKEPHRFEPGSVFHLLEPDINQEMYGLPEYISSLNSAWLNES
                     ATLFRRKYYQNGAHAGYIMYVTDAAQSGTDVDKLRAAMSNTKGLGNFKNLFFYAPNGKP
                     DGIKIVPLSEVATKDDFFNIKNASRDDLLSAHRVPPQMMGIIPNNTGGFGDVEKASQVF
                     VRNELVPLQERMKEINEWMNEEIINFNAYVF"
     CDS             complement(38186..38812)
                     /codon_start=1
                     /product="hypothetical protein"
                     /label=hypothetical protein
                     /db_xref="SEED:fig|6666666.356865.peg.44"
                     /translation="MGGVLNPILSFISICLLIHSVRLQLQSNQALMHELKRQEKLENYK
                     KFEMRFFSLIEAQESNFDKLRIAIDDTPHNDELQHENTPKETSLIQYKSGNAVTYIDDS
                     LSLLVNGGIGKERICEWLEDLDVDDHFFSLARRFYLPLKLINDKVEENEREEQYELLIN
                     LTDEKLLTIIVILCSYFEWDNLNYIKNSKILKQANMDNYVSNYLK"
     CDS             complement(38934..39782)
                     /codon_start=1
                     /product="Mismatch repair ATPase (MutS family)"
                     /label=Mismatch repair ATPase
                     /db_xref="SEED:fig|6666666.356865.peg.45"
                     /translation="MCNQLSQGKVMRVNYDVIIKSGDDEVDMEYGIATLGGTAEVTCLL
                     AEAILRKVIIKRRTHVNPARAVLKKNFTGSYGQNFDLVINEPELIYELHRISKPVFNEV
                     MSFFISQSLYLETRELSNEAEEVVKGLSDIEDELIGRIRAPLKRMHEINVKKNYNIELN
                     FKQRAHDKKKVIELDTATATNLFKSKVAKKTEEIRAYITRFNARTGNGRLVLEGEDETV
                     AFGFYSPLRIIMSSQKKMISENLHVNNSPSSEGRIYLKLTVSRVRINSGETIKYLVHTV
                     Q"
     CDS             39809..40000
                     /codon_start=1
                     /product="hypothetical protein"
                     /label=hypothetical protein
                     /db_xref="SEED:fig|6666666.356865.peg.46"
                     /translation="MACYVFEHLTFKFDNVRNAIPATPARFVCRFSCTRAIRASYGVNG
                     DKLGLDHHAKSCGLCMHG"
     CDS             complement(39997..40284)
                     /codon_start=1
                     /product="hypothetical protein"
                     /label=hypothetical protein
                     /db_xref="SEED:fig|6666666.356865.peg.47"
                     /translation="MTKISICKILYMNTVKIRKWHPLENTEHIQAVLSRVQLIADISLV
                     AQCDVDELKTAMSIIADLANGTIETREYREISDKSELVEYLKKRLEDAVF"
     CDS             complement(40377..40715)
                     /codon_start=1
                     /product="Phage protein"
                     /label=Phage protein
                     /db_xref="SEED:fig|6666666.356865.peg.48"
                     /translation="MPKSPADRKAAQRARQRDAGVVKIEIHVDAQELDMLKRNCALRRP
                     GREPYDIDEYLTTLIRQDAAALQQKIAELSQRKCQKCWEKLPVSECCLSGASEFWNTQG
                     WHDLKLIL"
     CDS             complement(40708..40905)
                     /codon_start=1
                     /product="hypothetical protein"
                     /label=hypothetical protein
                     /db_xref="SEED:fig|6666666.356865.peg.49"
                     /translation="MHQLTREIPKFTLRHLKLAGVIQRLQDIMVKENLTPDELVSCSEA
                     VRDSQRRIDSALLKSEGSDA"
     CDS             complement(41125..41265)
                     /codon_start=1
                     /product="hypothetical protein"
                     /label=hypothetical protein
                     /db_xref="SEED:fig|6666666.356865.peg.50"
                     /translation="MSQRGISVQCWELEALARGAKMKIDGELISYPAADEWPGFSNQME
                     V"
     CDS             complement(41267..43336)
                     /codon_start=1
                     /product="Phage replication protein # Replication gene A 
                     protein"
                     /label=Phage replication protein # Replication gene A
                     /db_xref="SEED:fig|6666666.356865.peg.51"
                     /translation="MGAYPWNAPRPAIVPEERQLTREEWTQGQAVLAKINQQPHFLREI
                     CLNRYVYLKKNKGQLSANRFLVNSFMQRMWPRIEAINTRHAMNRHASERFLSEYDNYQT
                     LPGMNGKALGRLAARISGQIFSAYEEMSDAMKAERGGQRDALFTDAAQAELFGHVASMA
                     RAFNITPLFWKNYRKGTLNIRKAIASLRRMTNEEWWVRQLKAQRTRWREALMIAVGQVS
                     KKASPYASKMAIRDVQARRLANMDYLKSCELENVATGERIDLIDKVMASISNPEIRRME
                     LMSTIAGIERYASEHKDVGMFITITTPSKYHPTRVIGKGENETVQFNRNWDNEAFTPKD
                     GQRYLVSIFSKMRTAFKDNGLKVYGMRVVEPHHDGTPHWHMMLFCKRAHRQSVIDIMRR
                     YALKEDGDERGAAKYRFECKHLNKGGAAGYIAKYIAKNIDGYALDGQLDDETGKPLRDV
                     AAAVTAWASTWRIPQFKPIGVPTMGAYRECRSGTLRSVNLTDQFDEQVEAVRFAADAGD
                     FAAYMAAQGGANVSRELQTVRVARRVSDKLNEYDEEVQKVVGIFSPHLGDGHVFETRTT
                     EWRIVSKAVDLEPLTLKSASGAPRSPVNNCGLGSQRSGANVKTQAENSGIATTSETDNP
                     PIDWNDDAAVRALGMRLREQSVRKNHKQRDFNPNSLRDPSPSARLTGADTSYPD"
     CDS             complement(43408..44421)
                     /codon_start=1
                     /product="Phage-related protein"
                     /label=Phage-related protein
                     /db_xref="SEED:fig|6666666.356865.peg.52"
                     /translation="MNTVIDTRCFSADAININSVSGGKDSLAQWLLAIEAGVTTIRAFA
                     DTGHEHPQTMDYLDYLESKLGEIRRVKASFDDRIAVKRKFIAERWPVTLVTECGMTDSQ
                     AAATVARALDILHPTGIPFLDLCMWKGRFPSTKARFCTFDLKHAPIRDQIVMPLLAEYD
                     EVISWQGVRAEESPARALLPEWETDADNTPGLHVYRPILKWTHADVFALARRHGIKPNP
                     LYQQGCSRVGCMPCIHARKSELAEIFSRWPEEIARVAEWERLVAACSRRGNSTYFPSTQ
                     DPRKAERRIEFISVESHGIETYRDWALTSRGGNQFDLFAGMNDKAVCSSVYAGICE"
     CDS             complement(44418..44624)
                     /codon_start=1
                     /product="Phage protein"
                     /label=Phage protein
                     /db_xref="SEED:fig|6666666.356865.peg.53"
                     /translation="MVQQRQQEMLDHQIASARNAQRGVSAFECEDCDQPIPEARRAAID
                     GVTRCATCQGIHELKGKHYRGGL"
     CDS             complement(44642..44950)
                     /codon_start=1
                     /product="hypothetical protein"
                     /label=hypothetical protein
                     /db_xref="SEED:fig|6666666.356865.peg.54"
                     /translation="MENPAYNRVDINGNYAIAKVGYDFALGEIKCGKEDGDQPYLSTLA
                     VYQNPVSLINDFVHRAIATEIWRGNVTDSKKLLTESKRFAAMCQSAFDQLNNDKEQE"
     CDS             complement(44950..45192)
                     /codon_start=1
                     /product="hypothetical protein"
                     /label=hypothetical protein
                     /db_xref="SEED:fig|6666666.356865.peg.55"
                     /translation="MYKTVGQEIRRKAENEGIQLMLSQARTEAKADAHTSFSSRLDTLA
                     THAAIHELSSVEIIELLRQESDAFNHSGSDIKAVM"
     CDS             complement(45379..45810)
                     /codon_start=1
                     /product="Transcriptional regulator"
                     /label=Transcriptional regulator
                     /db_xref="SEED:fig|6666666.356865.peg.56"
                     /translation="MFDYEIAKHPHFNNACRAFANKQNLVDVAASIGMNAQMLRNKLNP
                     DQPHKLTCDELLAITDVTEDATLIDGLLAQLNCLPAVPVNEAKAERLTTYVLQATAAVG
                     AVAAESVSDERMTPARRHNVIESINAGVRYLSLVGLLAD"
     CDS             complement(45844..46248)
                     /codon_start=1
                     /product="hypothetical protein"
                     /label=hypothetical protein
                     /db_xref="SEED:fig|6666666.356865.peg.57"
                     /translation="MSQEIANASPRFDSAISPALVAELVKALTPEVNRVIKDAIEQVAA
                     VQMAPTMTKKEFARINNISNSLLEKWIANGVVLLAPTPTSTVKRAKKDKTTGEVVGHSV
                     MTKHGNALINLEAWREKNRQHAIKCRYIKP"
     CDS             46329..47216
                     /codon_start=1
                     /product="Repressor protein CI"
                     /label=Repressor protein CI
                     /db_xref="SEED:fig|6666666.356865.peg.58"
                     /translation="MYKCSWGVFLEGNDSLQEAPSVLQRVLSSYGAKTQKELSDLTSIP
                     TNTISNWIKRNNIPSNVILMCAVDTGADARWLVTGEFENSNLKIPPVTLKGKALYDQVL
                     ASGGKAVLRRMLDAYGFSTQKELGDLLGISTATISTWIRRDFFPGDVVIACALDTGVSL
                     EWLATGRGITNVGQGIAVDAPETITVAKKRLLAGKLEDDGFCSIDKSFLPEGVTQEKLC
                     YIRSGKDAWLVEMGEGEVSNGTWLLDIDGSLDVYSVSRRPSKLIVNGRDGEFECTVDEV
                     VVKGIVTIIFKTAI"
     CDS             47230..47703
                     /codon_start=1
                     /product="Phage protein"
                     /label=Phage protein
                     /db_xref="SEED:fig|6666666.356865.peg.59"
                     /translation="MDMSFVYINAQRIISAYSVSQVSESEEHFQGICHHSNQLRTFRKD
                     RLIENLPSYEEAVKVAAIIDASQYLHLFQKPKANLFEVFFTGFKKADKDRLVSLATENK
                     ISVRNSVTQNLQVLCCGYNAGPTKVTAARMKGVLILDEEQFLNMVSTGEVPDF"
     CDS             47728..48585
                     /codon_start=1
                     /product="hypothetical protein"
                     /label=hypothetical protein
                     /db_xref="SEED:fig|6666666.356865.peg.60"
                     /translation="MKSILFLILVVLSSSSIAADEISGANDVRHPVASMDTQSNIATPA
                     YYDDEKNLAKLAEKISSLNKDKRDALEILEKVDSFYSKSFYNLLMLILALTSIVGLLIP
                     IIISAYQTKLLKGQTINLQQTITNEVASKLSELKETLYADNEKKMLELEGDVKKIIEKM
                     EAEYKVEIKNLRAESLARINHVSAATCFVNKEYGTAAKFYFRAALNYMKYNNHSGIRNV
                     TNFLIKNVMAKIPSDHETPQLDERYNKFIKELSSFNTESIYNDAISELKSAWDDFEKRA
                     KRSK"
     CDS             complement(48595..48711)
                     /codon_start=1
                     /product="hypothetical protein"
                     /label=hypothetical protein
                     /db_xref="SEED:fig|6666666.356865.peg.61"
                     /translation="MLLFGEIHRSIDNSCLAKNEFNLKEGKGVALIKKKKKL"
     CDS             48788..49123
                     /codon_start=1
                     /product="hypothetical protein"
                     /label=hypothetical protein
                     /db_xref="SEED:fig|6666666.356865.peg.62"
                     /translation="MEYQSIRLNVNEGFQKLCAKHDLTLSKTECFSASTTMKDIIDFVY
                     QVKDANVHLALLAYIAVEWLKGRKGRKIHIAIENEKLKEITAENVSKEELESILTKTVA
                     LFTNESE"
     CDS             49187..49342
                     /codon_start=1
                     /product="hypothetical protein"
                     /label=hypothetical protein
                     /db_xref="SEED:fig|6666666.356865.peg.63"
                     /translation="MCRDTVAKGVFKCLILMMLMSIQSFFISLIFNYLFFISTKIHENR
                     YTVFYR"
     CDS             49740..49970
                     /codon_start=1
                     /product="hypothetical protein"
                     /label=hypothetical protein
                     /db_xref="SEED:fig|6666666.356865.peg.64"
                     /translation="MTNWGLGALVAGVVWLIVSFNMSTSIVIDGKLVTNVFLIAARESQ
                     MNMGWVLVVVGGVFTLLGVARKRYTNKHREP"
     CDS             50876..51040
                     /codon_start=1
                     /product="hypothetical protein"
                     /label=hypothetical protein
                     /db_xref="SEED:fig|6666666.356865.peg.65"
                     /translation="MIGNKEIAIFLLEKGADVNAVNDDGYSPLVVTIANGNQDIADILI
                     KNGGKELRL"
     CDS             51117..51491
                     /codon_start=1
                     /product="hypothetical protein"
                     /label=hypothetical protein
                     /db_xref="SEED:fig|6666666.356865.peg.66"
                     /translation="MRKIIVLVLALPLTSFAAINDINKAAHEICLTEWNITDKVGSTDR
                     DVLAIVNEEVSDFKERGFSLSDFGIDEPEYIATSARIAESFRKDHRPPNRQYDDDIRDT
                     LRELVVPRCVIKVKESLTNH"
     CDS             51757..51891
                     /codon_start=1
                     /product="hypothetical protein"
                     /label=hypothetical protein
                     /db_xref="SEED:fig|6666666.356865.peg.67"
                     /translation="MVSNECNVLSMGMRKTVDVIANGNEQEYVTEVGFWGQYGLWQTK"
ORIGIN
        1 acgataaaaa tcgatggggt cgactttcat gcagcaatct attcagcaaa aaaaatggtt
       61 aaaaagtgtg tttgttgcca gcgcgctact cgcaggcggg atgtcaatca gtgcggcatc
      121 cgctgcggtt attacttcaa ttcgtccttt gggattcatt gcgtcggcca ttgccgatgg
      181 cgtgacgcca acggagattc tgttacctga tggcgcatcg ccccacgatt atgccttgcg
      241 tccgtctgat gtccagcgtt tacagtccgc tgacctggtg atttgggtcg ggccggaaat
      301 ggaagctttc ctcgggaaac cgttagcgaa aatttcgtca acaaagcaga ttgcgctttc
      361 cgcgctgccc ggcattaaat ctgagctgga aaaagaggcc ggacacgatc atgaagataa
      421 ccatgagcag gcacatgatg agcatgaaaa aggccacgag cacagccatg ccgcccatga
      481 tgatggcgac gatggtcacc atcatggaga atacaatatg cacatttggc tctcaccgga
      541 gatgaccaaa caggctgcaa tcgctattca tgcaaaatta ttggaactta tgcctcagaa
      601 taaggacaaa ctagacgcga atctgcttta tttcacggat aaaattgcgc aagcagatga
      661 aaaaattgtt aagatgctag cgcctgtgca gggtagaggc tatttcgtgt ttcatgatgc
      721 ctatggttat tttgagaaac actacgggtt aagtcccttg ggttacttta cggtaaaccc
      781 tgaaattcag cccggtgcac agcgtttaca tcaaatacga acacagttgg ttgagcacaa
      841 agccgtatgc gtttttgctg aaccacaatt caggccagcc gttattaatg ctgttgccaa
      901 aggaaccgac gtgcgctcgg gtgtgctcga tccattggga agcaatattg cactgggtag
      961 agatagttat gccgatttct tattgcagct atcgaaccag tatgtgagct gtctggaggg
     1021 aaaattatga ggatacgaat aagtgcagca gatagtccga actatcgctc tggcgtataa
     1081 cagtttaccc cggccccatc gcgtcatgct ggggtcgctc accgttgtga cattggccgt
     1141 tgctgtttgg cggccttttg tttatcccca cgtcgatgac gcaccggtca ttgttaaaga
     1201 tatcgacctg gaaaccagcc aactgcgtac cctgacgcct gaagccagtg aaccgataga
     1261 ccaaccctcg cccgatgatg acatcccaca agatgagctt gatgaggata aaggtgccga
     1321 tgaaggcagc gtacatgagt acgtggtctc aacgggtgat accttaagca gcattttgac
     1381 gcagtacggc attgatattg ctgatgtcac ccaactggcg gaacagaaca aagatttgcg
     1441 gaacctgaag attggtcagc aaatatcgtg ggctctgagt gaaaacggtg acctgcaaag
     1501 cctgacctgg cagatgtccc gccgtgaaac gcgcatttat gagcgcgtag ggacggattt
     1561 caaagagcgt attgagacgc tgaaaggcga atggcgtaac agcgtactga atggccgggt
     1621 aagcggcagc tttgttagca gcgcaaaaaa cgctggtttg acgagtgctg aagtgcgtga
     1681 cgtcatcaag gcgctgcaat ggcaactgga tttccgtaaa ttacgcaaag acgatacctt
     1741 ctctgtgctg atgtctcgcg aaatgcttga tggtaaaagt gagcagagtg agttggtcgg
     1801 cgtgcgcctg aataccggtg gcaaagacta ttacgccatt cgtgccgaag acggtaaatt
     1861 ctacgatcgc gaaggttccg gtttgacacg cggttttatg cgtttcccga ccatgaaaca
     1921 attccgtgtt tcctccaact tcaatccacg tcgcttgaac ccggtgacgg gacgtgtcgc
     1981 accgcataaa ggcgtcgatt ttgctatgcc agtcggttcg ccggttttgg ccgttgggga
     2041 tggtgaagtg gtgattgcga aacgtagtgg cgctgcgggt aactatgtcg tgattcgaca
     2101 tggtcgtcag tatacgactc gctttatgca cctaaatcgc atattggtta aaccggggca
     2161 gaaagtgaag cgtggcgatc gcatcggatt atccggcaac accggtcgct ccaccggacc
     2221 gcatctgcac tacgaactct gggttaacca gcaggctgtt aacccgttaa cggctcaact
     2281 accgcgttcc gaagggctgg cgggtaaaga tcgtcgtgat tatctggcgc aggtgaagga
     2341 agtggtgccg cagcttaagt ttgattaacg ctactgactg catgttatgc cggtggcttg
     2401 ctgccggcat tttcatttat ggcgcacggg ttcctggttt tttgttatcg agctgacgtg
     2461 tttctgcatc attgccggtg gatgttgcta aacgctgagc ggccattatg cttatgttta
     2521 ttgattgatc tgaagagttt aggcatggaa aaagaaaaaa aatcgaacgc tgaatttatt
     2581 ccccagttac aacgcgcctt ctttcatccg cgctattggg gcgtttggtt aggtgttggt
     2641 gtgatggcac ttgcggctta tattcccgca cggttaagaa atccggtgct gggcgggtta
     2701 gggcgttttg tcgggagaat atcaaaaggg gcccgccgcc gtgctcgcat caatctgctg
     2761 tattgcatgc cggagttaac ggaagcacag cgtgaaacca ttattgatga catgtttgcg
     2821 acggcacctc agtcgatgat catgatggtg gaagtcggga tccgtaaccc gaagacaatc
     2881 gagaagtatg tgcgctggca cggtgaagac attctggagc gcatcaaagc gcaagagaag
     2941 aacgtgatct ttctggttcc gcatgggtgg ggcgttgata ttccggcgat gctgctgacc
     3001 tctcgcggac agcgtatggc ggcgatgttc cacaatcaga agaatgaact ggtagattat
     3061 tggtggaatc ggttacgtcg tcgctttggt gggcgcatcc atgctcgcaa tgacggtatt
     3121 aaaccgttta tcagctccgt gcgctccggg tgctggggat attacttacc cgatcaagat
     3181 cacggccctg aacacagcga attcgtcgat ttctttgcga cctacaaagc tacgctgcct
     3241 gctgttgggc gactgatgaa agtgtgccgt gctgatatcg tgccgctgtt cccggtatat
     3301 aacgccaaag atggctgtct ggatgtgtat attcgcccgc cgatggttga tttggcggaa
     3361 gcggatgatg cctacattgc aaggcgcatg aatgaggaag tggaaatcct ggtcaggccg
     3421 aaccctgagc agtacacctg gatcctgaag ttgctaaaaa ctcgcaagcc gggagaaatt
     3481 gaaccgtatt gccgggatga tttgtaccga gacaagaagt gagatgagtc gcggatagcc
     3541 atctattgat aaaaaagccg gacgagaaat cgtccggctt tttactcgta tgtgacccgt
     3601 ccagcactgc gtagtggacg gagatgccac agattattcc acgcgcagga tacgaatcgt
     3661 gttggttgtg ccgactgtgc ccatgatgtc gccttgtgta acgatgacca gatccccaga
     3721 catcaggaac cctttatcac gcagccggat taccgcatca ttggccgcgg caacgccatc
     3781 tgtgtagcta tcgaaatgca caggggtgac gccgcgatac agtgcggtca ggttcagcgt
     3841 gtgctcatga cgagacatgg caaaaattgg caaaccggaa ctgatacgag acatcatcag
     3901 cgcagtgcgg ccagattctg tcatggcaat cagcgcggta acccctttca ggtggttggc
     3961 cgcgtacatg gaagacatcg caatggattc ttctgtgtta tcaaactgca cgtccaggcg
     4021 gtgtttggaa acgttgatgc ttggaatttt ctccgcgcct aaacacactt tcgccatggc
     4081 agcgacggtt tcagccggat attgacccgc agcggtttct gctgacagca tcaccgcatc
     4141 ggtgccatcg agcaccgcgt tggcgacgtc catcacctcg gcacgcgttg gcatcgggtt
     4201 ggtgatcatc gattccatca tctgcgtagc ggtaatgacc gcacggttca actgacgggc
     4261 gcggcgaatc aacttcttct gaatccccac caattctgga tcgccgattt caacgcccag
     4321 atcgcccctc gcgaccatca ccacgtcgga agccagaata atgtcatcca ttgcggcatc
     4381 tgaacagaca gcttcagcac gttcaacttt tgatacgatc ttggcgttac agccagcgtc
     4441 acgtgcgagt cggcgtgcgt agttgaggtc ttcaccggta cgtgggaaag agaccgccag
     4501 atagtcgacg ccaatttttg cggcggtaat aatgtcggct ttatcttttt ccgtcagggc
     4561 ttcggcagac aagccgccac cgagtttgtt gatgcccttg ttgttagaca gcggcccacc
     4621 aacggtgact tcggtataca ctttcaggcc ttcaacctga aggactttca actgtacccg
     4681 gccatcatct aatagcagga tatcgcctgg caccacgtcg cttggcaagc ctttgtaatc
     4741 gatcccgact ctttctttgt cgccttcgcc tttggctaaa ttggcatcca ataagaattt
     4801 gtcgccgata ttcaggaaga ttttaccttc tttgaaggta gaaacgcgga tttttggacc
     4861 ctgtagatcg ccaagaatgg caacatggcg gcctaatttt gccgcaattt cacgaacttt
     4921 gttggcacgt aattgatggt cttctgctgt gccgtgagaa aaattcatgc gtactacgtt
     4981 agcgcccgca ctgataatct tttcgagatt attatcgcgg tcggtagcgg gccctagggt
     5041 ggtgacaatc ttggttcttc tgagccgtct ggacatgtat aactccgttc acttgtgaag
     5101 ctgtagtgtt gcgattaagc gtcgaataac cgtgcaaaat atcacgttac aacaaaacta
     5161 tttcacctac gttatccgaa catcgtgttg agtctgatta tcatactgta caggtaatcc
     5221 ctgtcatctt tccatgaccg tagccgctga ccacatcgag atgaggcagg tagatgatac
     5281 cgctcatttt tattacccgt catacttcaa gttgcctgtg cgttggctgc attcaaatac
     5341 tcggcccgtc gtgagcctcg ccctggcggg tcaacgcttt gtgttgttca aaacgttaac
     5401 gttttgtcct gaaactcgaa ttatttaggg tatataacta gaaacaaagc acaacgtaaa
     5461 acttacctat cacctgaagg gattaatcaa ccgttcgtct ttatcaaagc gcgactcgcg
     5521 caaggcctct ttgacccgtt tcaggttatc acgaaatttt tctccgcggc gtaaagtaaa
     5581 ccccgtcgcc agcacgtcga tcagtgttaa ctgagcgatg cgggacacca tcggcatata
     5641 aacatcagta tcttcaggca cgtcaagccg cagcgctaac gaggcttcac gcgccagcgg
     5701 cgtgccatct gaagtgatgg caattacggt cgcgtcgttt tcgcgtgcca actgcgccat
     5761 ttcgaccaga cttttggttc tgccagtatg agagatcaat accacgacgt cgccgtcgct
     5821 ggaattcatg cagctcatgc gctgcatcac gatgtcatcg aaataaacga cggggatatt
     5881 aaagcggaaa aatttgttca tcgcatcgtg tgcgacagcg gcggaggcac ccaggccaaa
     5941 aaaggaaatt ttcttcgcct gcgtgagcaa atctacggcg cggttgacgg cagcgacatc
     6001 cagactggat ttcacctgct ctaagcctgc catcgcggat tcaaatattt tactggtgta
     6061 ggcgtcaacg ctgtcatctt cttcaacgtt acggttcaca tacggtgttc cgtttgccag
     6121 actttgcgcc agatgtagtt taaaatcggg aaaaccctta gtttcaaggc ggcggcagaa
     6181 acgattgacc gttggctcgc tgacatcggc cattttggct agggttgcga tgctggagtg
     6241 aatagccgtc tgcggagtgc tcaggatcgc ttcagccact tttctttctg atttgcttaa
     6301 gagatctaga tggctttgga ttttttccag catattcata cgacaagggc catgtaagtt
     6361 ttttccaatt tcaactaaag gtacaactgg catgcattac gtgaaaatat actacgaccc
     6421 tgtggtggtt ggcagcgggc aacatgctaa gttggggtct ttttttacca gaacatgaca
     6481 tgtgtctaac tttcagaaaa gtaatcgact gtcagaaacg acgaaaaatt tcgctttagg
     6541 gcgaatcgat aagtgattcc agctactgca cagaccgatt tatgcgtggt ttttagtcaa
     6601 tatcacccat tatttggcat ttttatgatg ggtttactgg ctgtagtcaa aaagagtaca
     6661 ttatggctgt aataaaatta cagcatcctg caacgaggag atgaacatgg cggtaacttc
     6721 aacagcccaa gcgtgcgatc tggttatttt cggtgccaag ggcgatctgg cacgccgtaa
     6781 attgctgccg tccctgtacc agttggaaaa agcagggcac atccatgcgg acaccaaaat
     6841 tatcggggtg ggccgtgcgg attgggataa agcggagtat acccgcgtcg tgcgtgaagc
     6901 gcttgacacc tttatgaaag aagccatcga cgataagttg tgggaaacgc taagcggtcg
     6961 gctggatttc tgcaatctcg atgtggaaga tacgaaagcc ttcaacaaac tgggcaagat
     7021 gcttgaccag aaaaatcgta ccaccatcaa ctactttgca atgccaccca gcacatttgg
     7081 tgcgatctgc aaagggctgg gaaccgctgg actgaataaa gatccggcgc gtgtggtgat
     7141 ggaaaaaccg ttgggtaccg atttggcgtc gtcgcgtgtg attaacgatc aggtcgcgga
     7201 attctttaac gaatgtcagg tttaccgtat cgaccactat ctgggtaaag aaacggttct
     7261 gaacctgctg gcgctgcgtt ttgccaattc gttgttctcc tcgaattggg acaaccggac
     7321 gatcgaccat gtacagatca cggtagctga agaagtcgga attgaagggc gctggggcta
     7381 ttttgacaaa gcaggtcaga tgcgcgacat gatccagaat catctgttgc agatcctgac
     7441 gatgattgcg atgtcgccgc cgtctgattt gacgactgac cgcattcgtg atgaaaaagt
     7501 gaaagtgttg cgttcactgc gccgtattga ccggtccaac gtgcatgaaa cgaccgtgcg
     7561 tggccaatat tcttctggtt ttgtccaggg acataaagtg ccgggctatc tggaagaaga
     7621 gggcgcgaat aaaagcagca gcacggaaac cttcgtctcg attcgtgtcg acattgatga
     7681 ctggcgctgg tctggcgtgc cgttctactt gcgcacgggt aaacggctgc cgacaaaatg
     7741 ttcggaagtg gtcgtgtact ttaaaaaccc tgcattgaat ctgttccatg attcttacca
     7801 gcagttaccg cagaacaaac tgatcattcg cttgcagccc gatgaaggcg tggaaatcca
     7861 gattctgaat aaaattccgg gattagagca taagcatcgc ctgcaaacgg tgaagctgga
     7921 tttgagcttc tcggaaacct ttaatcagca gcatttagcg gatgcctatg agcgtctgct
     7981 gcttgaaaca atgcgtggaa ttcaggcgtt gttcgtccgc cgcgatgaag ttgaggaagc
     8041 ctggaagtgg gtggattcca tcatggaagc atgggcgatg gacaacgatg caccgaagcc
     8101 ttatcaggcg ggaagctggg gaccagtggc gtccgtggcg atgatcacgc gcgatggccg
     8161 ttcctggaat gagttcgagt aattttttga taatacgtca gtagccggaa tgtcgaggtg
     8221 tgttggcatt ccacagtttt aatgtatggc ttacggtgcg gttggcatct gcggcaacgc
     8281 agatccctgt ggcaggggcg cgctatataa ttaatgatgc cttcgggcat gtctggagat
     8341 gatttttgat gaaaaactgg aagacgagcg cggaacagat tttgacaacg ggtcccgttg
     8401 ttcctgtgat tgtggtcaac aaactggaac acgcggtgcc gatggcaaaa gcgttagtcg
     8461 cgggcggcgt tcgcgttctg gaactgacat tgcgtaccga ctgtgctatc gacgcgatcc
     8521 gtgcgattgc gaaagaagta ccagaagcta tcgtgggcgc gggtacggtg acaaaccctg
     8581 agcaactggc tgcggtggtt gaagctggtg cgcagtttgc cattagcccg ggcctgaccg
     8641 agccactgct gaaagcagca tcggcaggca atatcccgtt gattccaggt atcagcaccg
     8701 tatctgagct gatgttgggt atggattacg gcttgcgtga gttcaaattc ttccctgcag
     8761 aagctaacgg cggcgtgaaa gcgcttcagg cgatcgccgg tccattcgct catatccgtt
     8821 tctgcccaac tggtggtatt acgccgaata actaccgtga ttacctggcg ctgaaaagcg
     8881 tgctgtgtgt tggtggttct tggttggtgc cgaacgatgc gctggaaagc ggtgattacg
     8941 cacgtattac tgaactggcg cgtgaagcgg ttgctggtgc aaaagcgtaa gttcgctagt
     9001 tattgaatga cgaaggccac tcactgcgag tggccttttt tatgacggac atccttgtcc
     9061 gtcaccctac gggccgtcgc aagcgacgtt gaaaaatgtt ccctacattt ttttatgacg
     9121 ggcatccttg tctgtcaccc tgcgggccgt ccaatcagca acagtagtat taaccgctga
     9181 cttttacgcc agccgcgacg cgtttggcga tttcaacagc atcgtctgtc gtttctgcgc
     9241 tggctaacgc aacgcccata cggcgtttgc cgctgatatc tggtttacca aacaggcgaa
     9301 tttgcgtatg ggggaggagc gcactttcta gaccctgata acgcacgttg ttgctttcaa
     9361 gctccggcaa aattacagca gaagccgatg caccgtactg acgaaccacg ccaattggca
     9421 acccaaggaa agcgcgaacg tgcagggcaa actcggacag atcctgagaa atcatcgtca
     9481 ccatgccagt atcgtgcggg cgaggggaga cttcactgaa aataacttca tcaccgcaga
     9541 cgaacaactc aacgccgaac aagccatagc caccgagcgc tttcactacg tcgctggcca
     9601 tcttttgtgc gcgatccagt gccagttcac tcatctgctg cggctgccag gattcgcgat
     9661 agtcgccatc ttcttgtcga tggccgattg gcgcacagaa atgaataccg tcaaccgcat
     9721 ggatggttag cagggtgatc tcaaaatcaa aattaaccaa cccttcaacg atgacgcgtc
     9781 cgctgcctgc acggccaccc tgttgggcat agctccatgc ctgctctaac tgttcagcgg
     9841 agcgaatcag gctttgccct ttgccggatg agctcatgac gggcttcaca atacagggat
     9901 agccaattgc ctctacagct tgataaaaac gctcttcact gtcggcaaaa cggtaggtgg
     9961 atgtcggaac gccgagcgtt tcggcagcca gacgacggat accttctcgg ttcatcgtca
    10021 ggcgtgtcgc ttcagcacag gggacaacat ggtggccctg tttttccagt gtcaccagca
    10081 tatcggtggc gatggcttca atttccggca cgatataatc agggcgttcg gcttcaacca
    10141 acgcctttaa tgcgtcgcca tccaacatat tgatgacgtg gctacgatgt gcaatctgca
    10201 ttgctggggc atcggcatag cgatcgaccg caatcacttc gattcccagg cgctgacact
    10261 cgatcgccac ttctttgcct aattcaccgg agccaagcag cattactcgt gttgcatccg
    10321 cacgcagggc ggttccaatc gttaacataa ccttatacct gatcgggttg tgaaaaatgg
    10381 ccgcagtata aacgaaaacg tttgcgtgcg cattaaagag ggcggctctg gaatgcgtta
    10441 cgcaaaagcg caccaagaga caaggacgtg gcttggcatt gctgggcaat cgtgccactc
    10501 ttctggcaga gtgaattttt atgtcaagac aacgagatcc gatgcgatga agacaccgca
    10561 agctgaaaaa aagccccacg ccataagcac acatggcgat acgcgtatcg acaactatta
    10621 ctggctgcgt gatgatcagc gtaccgatcc gcaggtgtta gcctatctgg aacaggaaaa
    10681 tgcctatagt gaagcgatta tggcgcctca cgaagtgcgt aaacggtcgc tgtatgacga
    10741 aatggttaaa cgcattccat cgacggacat gtctgtgccg tatgtcagaa aaggctatcg
    10801 ttatcaaagc cgctatgagc cgggtaaaga gtacgccatc tatctgcgcc agcctgagca
    10861 ctcgacagca acgtgggaaa cgctgttgga tgggaatcaa cgtgcggagg gacatgaatt
    10921 ttatagtctc ggcgcgcttg agattagccc aaacaacacg ctattggccc tctcggagga
    10981 ttttttatcc cgtcggcagt acacgctgcg ctttcgcgat ctgaacagcg gcgaatggct
    11041 accggatgtg atcgaaaatg tgaccgcagg tgcggaatgg tcagccgatt cgacggtgct
    11101 gtactacgtg cgtaaacatg aacaaacgct attgccgtat caggtctatc gtcaccgtct
    11161 ggggagcgat cccgcacaag atgaactggt atatgaagag aaagacgaca cctattatgt
    11221 cagcttgagt aaaacgacat cagagcacta catcactatt tacctcagta gcactacgac
    11281 gaccgaggta ttattactcg atgcgacgct cccagatgcg gtgccgcagg ttggcattcc
    11341 acgtcggaaa gatcatgaat atggtatcga tcactatcag gggcggtttt acctgcgttc
    11401 taaccgagaa ggaaaaaatt tcggtctcta tcgttcggat aaacctgatg aacaaacgct
    11461 ggaaacgcta attgctccac gtgaacaccg cgttctggaa ggttttgaac tatttcgaga
    11521 ttggttagtg gttgaagaaa gggaacgcgg tttaaccagc ttgcgccaga ttcactggca
    11581 tacgcaggaa gaaaaaacga tcacctttaa tgatgcgagc tatgtggcat ggctatcgta
    11641 caaccctacg tcagaaacgg cattgctgcg ttatggttac tcatcaatga caacccccag
    11701 cacgctgtat gaattgaatc tggatacggg tgaacagcaa cggcttaagc aagccgaagt
    11761 gaaggatttc tctccagatc attaccggag cgaacgcttg tggatcacgg tcagggacgg
    11821 tgtcgacgta cccgtttccc tcgtttacca tcgcgagcat ttcacccctg gtaagaaccc
    11881 gatactggtt tacggctatg gcgcctatgg caatagcatg gagccagatt tcagcattag
    11941 ccgtttgagc ctgctggaca gagggttcgt ttttgcctta acgcacattc gcggtggtgg
    12001 tgaactgggt cagcagtggt atgacgatgg ccgactgctc aataagatgc attccttcac
    12061 ggatttcatc gatgtgtctc aggcattgat agaaaaaggc tatggcgaca gggaaaacat
    12121 gttcgcgatg gggggcagtg cgggggggct cttgatgggg gcggtagtca atatggcccc
    12181 cgatttgttc aaaggtgttg tcgcccaggt cccgtttgtt gatgtgttga cgacaatgct
    12241 ggatgagtca attccgctga caaccggaga gtatgacgag tggggcgatc caaatgaaca
    12301 aacctactat gactacatca agcaatatag cccctatgac ggtgttaccg ctcagcgtta
    12361 tccacattta ttggtgacta ccgggctaca cgattctcag gttcagtatt gggaacctgc
    12421 gaagtgggtg gcaaaattgc gggatgtcaa aacagacgac cgtctggtgt tgctgtacac
    12481 cgatatggat gccgggcacg gcggaaaatc aggccgcttc aaacgctatg atgacattgc
    12541 gttagaatat gctttcctat tgatggtgct tgaaaaggct gcggaaggtc acgaataagg
    12601 gctagcaact gaagttatga gggtaaaccc gttttcgggt ttacccggtt ggcatgacac
    12661 attacttggg caatatcaga actcaagtaa tatcagcctg cggtttcttt gcttttttgt
    12721 cggcccgttt ttcggcggcc gttttcagtg gcttcttctt actgttcttt ttgctatcca
    12781 gtcctttact catatcttgc ctcgcttgat aaaaggttag gttgctatcc cattaacctc
    12841 ctgtgcagtt cgatatgcaa gtagaaaatc atttttgctg tgtaagaatg taacccgtgg
    12901 aaagggatgt tttccacggt aaggcaatct tagaatggaa tgcgaggaat cgctatttag
    12961 acttaggctc gtagggtaaa cgagagaact gtagtgagcg ttgacgataa aacgtcacac
    13021 gttcacgaaa gtagttacgc aggtgctcgg gttgttctct ctcaacaact tctggaatga
    13081 ctggcatatt gtaacgttct ttgaaggcaa cgcctgatgc cgccagatct acgttaacct
    13141 tatccatatc ctctttggat aattccgcca gattatgtcc cataccgctt tctcctgcct
    13201 attggtcacc gactgattgg tgccacggta aagtagcgac aggaaaatgg caagtgttca
    13261 ccttatcatg tggatgttta ttattctgat tgtgaaatgg gaatcatttt taataccagg
    13321 aagatataaa tgatatagat cgaaattgct atttttgata ataaaaatga ttcgcaataa
    13381 tacagtgaaa atcattccta agtgataata aatatcaatg caaataatat taattatttg
    13441 tttttattga ttattttatt tttaaatcat cagtgttaat aaaatgtttt ttattttatt
    13501 ttttcaggca taatgcccta aataattaca cctgccggga aataaggagt taccatgtta
    13561 aaaaaagaaa tgattcagaa gttgaatgag caacttaatc tggagtttta ttccgcgaat
    13621 ttgtatttac aaatgagtgc atggtgcggt gacaaaggtt ttgaaggcgc atccagtttc
    13681 ctgaagacgc attctcagga agaaatgcaa cacatgcaac gcctgttcga ctacctggat
    13741 gatacaggaa gcttgcctgt attaggcgcg attgctgcac cgccgattga tttcgattca
    13801 ctggctgatg ttttcaagtt gacctacgaa cacgagcagt tgattacagc aaaaattaat
    13861 gagctggcgc atgctgcaat ggcactacag gattattcta catttaactt cctgcaatgg
    13921 tatgttgccg aacagcacga agaagaaaaa ctgttccgtt ctattcttga caaactagct
    13981 ctggtcaaag cgagcgaagg cggtctgttc ttcatcgatc aggacctgaa aaaaatgtct
    14041 acggcagcac cgtcagccta acgacaatcg acgcttttgt cggccaatgt gcatttgaag
    14101 agcgcgggat aatattcttt ttatcccgtt atttctttcc tcgaacgacc tccctactta
    14161 taccacgctg tcgattttat tcttggcttc acactcgact tcatcttcct ctgtcgctat
    14221 gatcgcgtta gtcgtgatac acaactttat gttttataag gtttgatgcg gtctttctct
    14281 gatttggata aggctgcaaa actcacacat cattgtctga atacgcatgt cgggaatacc
    14341 atgatgaaga aatttttgct atctatcgtg cttacctcac tttctgtgaa tgcttttgct
    14401 gctgctaaac tggcaaatat cagccggctg gaatatggcg atcgttgggc tttcacgcgt
    14461 gaagaagtgc aattgatttg tcggcctggc aatgcgctgt atgccctaca tactgggacg
    14521 ttgatgcaat atccgctaaa cgatactgct attgcgcaga tgaaatctgg acaggtgagt
    14581 gcacaaccga tagacgtgat ttggctggac gatcctaaac accccggaca gaagaaaagc
    14641 cttcagccat ttatcgatcg tgcagagcaa ctgtgcttac cagatggtca gccatgaagt
    14701 gattgattta cctatttaat gttaatttct tgcttcttta tggttaaggt aaagtgtgaa
    14761 acctgttcca tttgtgataa ttgcgaacgg gttgaagctg gaaaacgcag gggagttggc
    14821 tacgcttaag gttacaaggc tattacagct tgtataaatg ccaactttta gcgcacggct
    14881 ctcccaagag ccatttccct agactgaata caggaatcgt attcagtctt tttttataac
    14941 ctatataaat acaataggtt atgtttaaaa tcagtcgctt atctctactg tgttctactc
    15001 aatattaccc tataacatag tctgccgcct ttttgtcgcc aatagctgac gccagcgggt
    15061 tcagacgaat agcatcttct aaatggtctg gtgcaaagtg tgcataccgc attgttacac
    15121 gtatatctga gtgcccaaga atcctctgta gcacaatgat attgcctccg ttcatcatga
    15181 aatggctggc gaatgtgtga cgtaatacgt gggtcatttg tccttctggc aactcaatgc
    15241 ctgccattct aacgacccga taaaattgtt tatagcaagg ggaaaatggc tttccgttgc
    15301 ggctgattaa ttcttggtaa agctgatcag aaattggaac ggtacggttc ttttttcctt
    15361 tcgtgttaat gaaagtaatt ttgtatggtg atagttggga tgatttaagt tttgctgctt
    15421 cattccaacg agatccagtt gaaaggcata cttttacaat aagggttaac tcttcatttt
    15481 tatgattctc acaggctact aataactggg ttatttgttc agaagtaagc cacgccattt
    15541 cacgttctgg ctggtcgaat tctcttacat tttcaagtgg attaggtaat tcccattcac
    15601 caagccgttt taattcatta aaaaccgccc gtaaaaaagc gtgctcgcag ttaattgtgc
    15661 cagtagatac ctttcttgtc tcaagactgg tactgtagcc gttatcaata gcaccttgta
    15721 atcgcagatc ccggtaatgt gcccaatcct ttgctgtcag tgatgatgcg attggattac
    15781 cgaggccgtt acagataatt ttaagtttac ctaaacgccc ctttttatcg ttcaatgaac
    15841 aaccgtgtag cttgtaccac aaatcaatca gctcattgag ttttcgtcga tcttcctttt
    15901 ctcctaacca cggctttaac ttggtttgct ccataacata ctgttcataa gatacagcct
    15961 cccctttggt tgaaaattgt tttctgaccc gctttccttc tcttccattg gggtaacatt
    16021 cacataacca ctttcctgtg ggtagctttc taatagtcat tattcaaatc cgaggtaaac
    16081 agaatatttt actgtataaa aaaacagtat aaatgtttat taggggcgga ttcaaacagt
    16141 gacgatatga aaagcccacc ttagtatggt gggcagaaga gggaagggga caccctaaat
    16201 ccagagtgct ccctgatttg accgatcagg atgtggcggg acgggcttaa catcgcccgg
    16261 cgtcataata atatctgcta tggtttccat tgatttgaat gtgcaaccgc agttgatatt
    16321 ctggcactgg tgataacgtt cttttgtctt gttcgtaatg tagcgactgg atctcgcgtg
    16381 tgctgcattt tggcagagtg ggcaatgcat catttcgtaa atcaccttat cgttctttct
    16441 ggtttatatc gtcaatcata tcactttatt cgatttttca aatgatgatt tgaaaatgaa
    16501 ttactgctca cttatcccat actcagcttc agacagcagc acctccagtt ccagtgcggt
    16561 aacgtagcct gaattgctca aactgtgcgt cacttttgaa attgtccacg gctgttcgtc
    16621 gatcacctgt ttgaatccgc tcacctgaac aggggtttcc gggaacaggt cagcgcgccc
    16681 cattgccagc gtgatagaga actccgcgac accacgttgc agtttgtccc actttgcttg
    16741 tgcggcgcgt gtggcctgtg ccttagtcgc aaaaaccgtg gtcagcgcca gcacgttctc
    16801 atccgtgcca accagataat ccccctcgcg ggcttctggc ttcttcttgg cctttttcgc
    16861 tttagggtgt ggcttctgtg gttgtgcgcc ttgatgcaac agcacttttt tctgacgctt
    16921 taccttcacc attttcggct tttcgggctg aggctcttta gtatgcaacc agcttgcggt
    16981 tacccctgta tatgctcccc gatcagccag gctaaaactg tgctgatcgc cgtcgctgcg
    17041 ttcaatcatc tgctgcggga tgagcttgcc gctggccgtc ttccccgttc cgggacggat
    17101 aaacagcaaa cgtccggctt tgattgccac aatcgccccg ttgcgctcgg ccagccgggt
    17161 aataaatttc gcgtcggttt ccagcgtctg gtcgatgtgc ggaattttta tccccgcgaa
    17221 tccatcagcc agcatcggcg caagattgtt gcgctttgcc acctgttcaa caatcgcacc
    17281 cagcgtggtg tcgtgatacg acagctcacg ccgcgagttc agcgacccgc gaaaatcggc
    17341 actacgcgcc cggatggtca gcgtatctgg cgttccacgg tgctctattt catccaccgt
    17401 aaaatcaccc ttaccgatca gcgcgtcacc ttcccagccc aaaaataccg acagcaccgc
    17461 gccccggcgg ggtagctgta acagtccgtc gctgtcgtcc agctcgatgt cgagttggtc
    17521 ggcctcaaat ccccggttat cggtcaggct cagcgataac aggcgtgggc tgataacggt
    17581 cgtaatgtcc tgctcattca gacgtagcag gtacgcgggg ggcggtttta ctgcctgcct
    17641 gtacatttac cgggttaatc atgcgaataa tcccccgata gccgcttgcg ccttattcgc
    17701 catttccccg gcactgccga tcaagccctc ggcctgctgg cgtaaatcgc ccagcacggc
    17761 agacagtgac gagtctacgc gggtcagcgt gacggtgaac tcaatccgcc gcgcgcgacc
    17821 gtcggggaaa aattcggttt tcgtctggct gatactgttc accacaaata ccccgtaaat
    17881 cgtgccgctc ccctcaatca gcggccatgc acgcccctga tcggccatcg tttccagcat
    17941 cagcaatgac agcgtgccgc cagtgatttc cggcagcaac gcccccgata gcgtgatttt
    18001 ttcctcttca acgccgagaa attgaaacgc cgggcgctgg ccgacgcggt tgtttgacgg
    18061 ccagcggtat tccacattgc gctgcatatt ctgatacggc agggtctgga gctggaaaac
    18121 aaacagccct aacgtgagca tcatcttatt cacctccctg ataactgtat tgactgaatg
    18181 cgcgtgaccg tgccgcccgt tctcgctgtt caagctggcg tgtgacttct tgcgcgatgt
    18241 cctgcgcact ctggccgggc tgggcaacaa tgctaatcgg cgcgtgaatg ctgatgggcg
    18301 acgatgccgt actggcctga actggcggcg ctatcgggcg ataggctgac atgttcatgg
    18361 cagcagacgc catcgcggcg gtgtgacggc ggctggtgac attgactggc ccttcaacga
    18421 tttccgggcc atgttcgccg acgacggcaa actctcccag cttgatcccg ccgccgttgt
    18481 cacgtacacc gctgtagcgg gcttcaatcg cctttgcgtc gttgccctgt ggggttggtg
    18541 cgttactgac gccagcttgt aacgcggcgg cttccttcgg cggcatgata ttttcagcag
    18601 tcggaagctt ctttgatttc tcatcaacta gccccagttt ttccagcagc cacgacacgc
    18661 cggatatcaa tgatttcatc ggtatcgttg cgatatccag cccattagcc agcatctctc
    18721 cgaaccgttt ccccatattg gccgcgccgt ccagctctgc ggcagtggat ttgaccggcg
    18781 tcagaaggtc accgaaccag ccaaacaacg cctttatttt gtcgcctatc cacgtaaaga
    18841 caggctgtaa cggctcgaat gcggcgatga taggcgcact ggccgcaaca aatccctcaa
    18901 ccacaccacc gataaacgcc ttgatgggtt cccaatactt ccagataagc agcgcaccgc
    18961 cgacaatggc cgcgacaacc agcccaaccg gggacagtag gacgcctaac gcgctgccaa
    19021 taaacatgaa cccggtgcgc aacagtgcca gcggtgacgt aaacagccac atcagcaccc
    19081 ggccaaaacc cgacatggca ccccggataa ccgtcaacgg gttaccgagc gccccgaatc
    19141 cggcactcag aaaccccgcc ccagcgacca aggcattaat cccccccatg acaggccatg
    19201 caaccagccc gatcccgccc agcaccgtaa tcaatgccgt tgccgcgcca gccaccatca
    19261 caatctggtg cgctaattcg gggttggctt tcacccattc attaacccgg ttcagccagg
    19321 cggtggcgct ttgcgtgagt ttacgtagta tgccgtcgtc gtcattgaac aggttaaagc
    19381 gcaggctggc catcgccccg cgcagccgtc cgatatcgcc ttcgaggtta tcgcgtaggg
    19441 tatcgcccat gcggtcagcc gctccggaca catcccccag cttattttcg gttccggcca
    19501 gcgcggtcaa aaatttcggt atctggtcaa tcgacaggtc ttcaatcggc gtaccaaaca
    19561 gcgcgatggc cgcattggca cgctctgccg ggtctttgat tttcagcagc ccggttgcgg
    19621 ttttctgcat cgctacccgt gccttatcgc cgccgctggc gatagcggta gacattttgg
    19681 cggcattgag tccggcggcg tcataggctt caatgctggc ctttgacatg tccgacccgc
    19741 gaatgctgaa ctccttcacc gcgtcgcctg tcttgtccag cgcaaacttg ccttgctgcg
    19801 ccatctccac taacagtgtc atcgcttccg atccgctgaa tcccatgttg cggaagtgtg
    19861 tcgaatactc gtgcaggatt tccggcagtt caccgggcat ctgagcggac acccgctgca
    19921 tcccggatac cattaaatca aacgcctcgt cgctgttttt agcgaggccg tttttcatca
    19981 tgatcgccgc aatctggata ctctcggttg cctcgccgcc gagcgccgcc tgcatgtcca
    20041 gcgctttacg cgatatccgc gtcagctcgg tttcccccac atcgcccagc gttcccaatg
    20101 tgctacgcac agcggccacc gcgtccgcta tctgggtaag atcgttactc acgccagagg
    20161 cgttaacctc tttaatgatg cgggtgtact gtttgccgtc ggcggcattg ccgcccgtct
    20221 gcgcagcgat acgcgcaccg tgtccatcgg cttcaacgct gggcgcaatc aggcggcttt
    20281 cggcatacag tgccgctgaa ccgaggccaa atgctgccgc cccggtatta cgtaccccgg
    20341 cggtgatggc tttgccttgc tcataacgct tgttgaccgc gttcagcttt tcctgttgct
    20401 gactcacacg cgccagcgct gcccgctgtc ggttcaacgt gtccgtagcg ccagcgatat
    20461 tcgttctaag ctggcgctct gcggcagaca gattacgcgt atcgatgccg gcggcacgca
    20521 gtgcgctgcg ctggttctgc acggacagcc gcaggcggtt ttgctgggtc tgtaattcag
    20581 ccgctttttg gcgtgcctct tccagtgcct tggtttgggc gcgagtgggg ttagcggtat
    20641 tgcgaaacgc caccgccagt gcagcagcgt cggccttggc tttttccagc gcccggcctg
    20701 tgcttgccag ttgggcgctg gtttttctga atccctcaat gcgcttggcc tgtgcttcca
    20761 gcgttttcaa ctgcgtttgt gaaccctgaa tttcacccga aagtgttcgc gccgcatttt
    20821 gcacggcacg aaacgggcgc gtcgcctgat cgacggcgcg caacaatacg ctgagttgta
    20881 gactgttact cattggcatg tccgctacgt ttgagcgctt tatcgcgcca caggatcaac
    20941 tcggtgaggc tcatcgggta cagctctgat ggcggccagt gaaaaatcac ggcgatatcc
    21001 gccatcagtt catctactgt caggcttcgg ggtaggtttc ctgttgcgat ttcggcgtca
    21061 aaaaaccgat caccttgccc gcgatggcaa tcatatccgg cagctccatg cgggtgattt
    21121 ctgcttcggt cagcgcgggg agggtcatac gcggcagcac tttaatcatg gcgtctacgt
    21181 cagaccccgc cagcgccgcc agactgacgc cgcgcagcgt tccggcggta ggtttaatca
    21241 gggtgaccgt ctcgatcagg gtgtcgccgc gtttgatggg ggtttccagc gttacaacgt
    21301 tgtcgtcttt gttcatgatg ttgcctctgt gttcagataa aaaatagaaa gaagacggcc
    21361 agcacggggc tgaccagaca gggttacacc agaccaattg cccggcggtg ctgctccaga
    21421 cgatcaacgc ccataacacg ttcaatcatg ttgatggtgt caatctcgat catctctttg
    21481 ccgtcaatgg tcaacttgta ataggtgcat tgggtggaaa tcttggtttc ggtatcttca
    21541 ccttctttgc tttcgccgcc gtcgatctcc ttatgacggc cgcgcatcac cacttcaaca
    21601 gcggcaactt ccccggtatc gtcacgctgg tacgccccac tgaaacgcag cagcaccgca
    21661 tcaatgcccg gtgcggcgta ctggctccac agggtttcgt cagcaaagcc gtccagcgta
    21721 aactccatcg ccagcgcgtc atcatccaga ccaaaatcaa tcggcgcgct gccgggcatt
    21781 ccagcgccgc gatagttctc cagcttgcgc gtgagcttgg gcaaggtaac ggcagtcgct
    21841 acgcccatgt agctcatacc ggcattaaac aggttcatca ttttcagttt gcgaggcagt
    21901 gccatagcgc tagctcctta gctattgacc gacgcggcca tattcaccag atatttatcg
    21961 gtgatgcgct ggcgcagggt gagattttcc agagggggaa cgggggtata gtcgtaatcg
    22021 atatacagtt tccccgcttt gagcgtgtct ttatcgttcg cggtttcatc gaaccagcaa
    22081 tcggcatcaa taatgtagcc gcccgttttc agctcgcgga acttggcttt gataccatcg
    22141 ataatgtctt tgataagcgt tggcgtaacg ggcttgtcga ctgcccacat gtgcgcctcg
    22201 gctatggtat cggccagcac ctgcgcggtg cgggtgtagt tctcaaacag gaacagcgga
    22261 tcgtcagaac aggtacggtt accccagaag cggaagccgt ctttacgaac cagcgtggtg
    22321 acgcctgcct gattcagcag atccgcatcc gttcccggtg cttgtaaatc ccaatacacc
    22381 gacgcgctga tgcccgtcac gccgttcacg ccgacgttag acagggtttt atgccagcct
    22441 gtatcctggt cgattttggc acgcaacccc aaagcgcgtg cggtcgcata cgccgtggtg
    22501 ctggcgttgg ccgtggtgtc ccacgcgata aagtccggcc agatcaccat cagttcgcgt
    22561 tggttgaaat tctcacggta gttgatggca tccgacaggg ttttgcagcc ccatgcgctg
    22621 acgtaaccga atgcacgcag cgactgacag atggaggcta acgcggtggc aacgggtaac
    22681 gagtccagtc ccggcgcacc gagaatgcgc ggcttcacgc ccgttaccga catggcatct
    22741 aacagggctt tcatcccggt atatttgccg ttttcgtcac tgccgccgat cacattgctg
    22801 atggtttcgg cctcgtcttt gccctcggcc actcgcacca caatggtgac gggctttgac
    22861 tgatcggcga tggctaacag ggcagcggcc agcgtgcctt ttttcccggc cttgccagcg
    22921 gcagacaaca cattggtaat cagtaccggg gtattgagcg gaaaggtagc cgcgtcggca
    22981 tcaggcgcgg tacacaccat gccgataatc gcggtggaaa cggtggaaat aacgcgcgtg
    23041 ccgtcgttga cttcgacgac ctgcacgccg tggtgaaaat cactcatcag gctcactcca
    23101 gtgaaatagg cagggttatt gtgttgtgta agcaatgagg gcgcatcttg ttgctgtttg
    23161 gctagcgctg ggacaacagg aagctattta tttgactttc ggctccccat aaccacaaaa
    23221 aatgatagga aaaaaaatga cataactata tcctgatgga attattacta tatatttcgg
    23281 ttgtttacga tttcttgagg gaatttaatg tatccttttc aattcagatg gacaaagtgc
    23341 catgaagatt tttgtatctc tgaaaatatt tttcttcagc atgtcatggt gacaaaaggt
    23401 gtatataaaa cccgcaacct ttttcggttt gaaaagggaa aaaaatcaat atgttttgtg
    23461 atgtttgggt tgaacccttt tcgactatgc cagcgaaagg cttctgttca atgggaacct
    23521 tttcctacgc agtgggttat ttaccaccgg aactgaaagt aggaaggttt tgcagcattg
    23581 ctcagggggt ttccattatg ggggttagcc accccatgaa tcgatttaca acacacccta
    23641 tgacctatga taatgatttt gtgattaaat ctggcataaa gggatgtgaa gaatttgacg
    23701 ataagttgcc tttgcccatt atcggccacg atgtatggat tggtggaaat gtggttttaa
    23761 aaggaggcat taccatcggg catggcgcgg ttatcggtgc taactctatc gtgacaaaag
    23821 atgtccctcc ctatgctgtc gttgctggca ttccagccaa aatcatccgt tttaggtttg
    23881 aaaatgacat cattcataag ctcttggaac ttgaatggtg gaactataaa ccgtcagata
    23941 tcccagcgca tgaaaagagt ataggtgagt ttataaaagc aattgaaaca agcgttggta
    24001 gtaatgaaat aaaaccacac gaatataaaa aaataaacct ctctgaaata ttcaaatcac
    24061 tttgttaaaa aatatggctc tcacttgaga gccatatcat caccgcggtt caataggcca
    24121 tattattttt tcaggaaatc cttcttgctc tgtaatattg cgcaaatttt gtcgataagt
    24181 tgaccatgcg gccttatcaa atggtgaatc cgtcgccatc tttccatcag aggaacttaa
    24241 acgttcatcg cgttgtttac gcacctgccc ggcaagaaac tgccgatgtt tttctgcatt
    24301 aatcttgatc atatgttccc ccaatgccgg aaggcgcaac ggtagtgtca atttcccatg
    24361 attcgacggg gctatccata aaagcgctga tatccatcac ccagaatggt actccgacag
    24421 gtacatcttt tttcccaatg tctgtagcac tcaatccaaa accggtattg ggatcgagaa
    24481 ttgctacacc atcatcacct tggtaaataa ctcttatcat gatgctcctc caaaaatagc
    24541 gattgagcac tgcgttgtat caaatgtccc atttccacca cgcacaataa ctcttacact
    24601 gttgatatct ttttttgtag catcacccag cccactatta ctgttattca atattgctgc
    24661 tcccccattc ccggtatagg caccatcacc gataccgcat aacacggcat agttgttatt
    24721 tttcatagga gtggcaaaat ttattgtata tatccctgta gactcacgaa caacagagct
    24781 cacgttgtat gagtcacgaa tagtggctga attaacgcca ccaaagttaa cccacgcagt
    24841 acagttttgt ttccctgata aagccactga aactttgcta tctgcttcag ccttggtata
    24901 agccccgaca tcggcagcac ccagcgtaat atctgccgtt agcgctttac cgttgacagt
    24961 acggccagac ggcacgcggc cattggcatt cgtattggcg ttagccgctg cggtggcggc
    25021 attgttcgcg gcagttgttg cagcggcaac gcgggtatcg gtctcggctt tagtataggc
    25081 accgacatcc cccgcaccca gcacgatatc tgccgacagc gctttaccgt taacggcgcg
    25141 ccctgatggt acgcggccac tggcgttcgt gttggcgtta gtcgctgcgg tggcggcatt
    25201 attggctgcg gtggtcgctg cggcgacgcg ggtatccgtt tcggctttgg tatacgcgcc
    25261 cacttccccc gcactcagcg taatatcagc agatagcgcc ttgccattga cagtgcgccc
    25321 ggacggcaca cggccattgg cgttggtatt cgcgctagcg gcagcggcgg cggcattgtt
    25381 agcggtaacc gcgacaacag acacggcggt atcggtttcg agtttggtat aggctcccac
    25441 atctccggca cccagcgtaa tgtcagcggt cagcgcctta ccgttaacct tgcggccaga
    25501 cggcacgcgc ccattggcat tatccaccgc agctttcacc gctttcgggg ttgcggccaa
    25561 cacctcgctg tcgctgtttg tcgcgctgct cagttgcaca aaccccttta ctgtcagcgt
    25621 cccgtctgga tgttggcggc ttttttcgtg tgcctcgatc acctcatcca catagccccg
    25681 cgtggccagc accaccgctg ggtcaatttt cagcgtcacg gcgtcggtgc tgctgacaat
    25741 caggatcatg cgcacggtct gaatacgtcc gctgccttcc tgcaattgcg gcttgtacgt
    25801 ctccgggcag ttggcgacag caatcagatt gccgtcgtcg tcaaacaatc cgatctcacg
    25861 tatccagaag ccgccttcat tttcgggaat gacctgctcg gcgataatct ggctggggtt
    25921 tttcgggtca acgcttagcg tattcagtgc cgcccggcgt ttttcgttga tcagcgtagt
    25981 ttgtgccgga ttgggaacgg gtagtgaacc gccaccatca ccgacagcca tgcgggtgat
    26041 gttcaggctg cttcccagcg tggtggcgtt agccaacttg gccgcgccga tgttcgttaa
    26101 cagggcaaaa taggttgcgc tcatgcggtt acgctcatgt tgtcgattaa atgaagtgct
    26161 gctccggtca catccagacc ggacaccgtg atgctttcag gaaaataggg gtataccgtc
    26221 aggtcatcgc cgccgtaaac ggtagcggca acataggccg cgccctgtgt gtcgaggttg
    26281 atatttagcc ccagcaggtg ccgcgaggcg ggtttggcgt cggcaatcag ccgctccagc
    26341 tcgtaaaagg tttcttctgt gataccgcta tcctgcacgc cgatgtccag gcgaaacgtg
    26401 cctggctctc cgccgttctg aaaccattcg ctgatacgga tcagataacc aaacggctca
    26461 acgacacgac gcagcgcacc aatcgtgcct ttgtggcgat ggataaagaa cgcatcacgg
    26521 ataacctgcc gtttcacact ctccggccat gcctcatccc agcggtcaac ggagaacgcc
    26581 cacgccagat acggcagcag gtgtgccggg caggtgtccg ggttccacag caggcgcagg
    26641 ggaaccggta cgcgggtaat ttcggcgcag gctttcgcgg cgacaacttc cagcacagac
    26701 gacccgacag gcagcaggcg gttatcactc atcggcaccg cccacaccca gccgatagcc
    26761 ggaacagtag gacgcctgcg catcggtcag cacgatatca gcggcgggtg tcgtcagctc
    26821 gacccgttgc acgccctcga cgtgcagcgc agcgtaaatc gccgagcgac gaatatcccg
    26881 ccccaatcgg tgctgcgcac tgacataggc tttcaacttc tgctcggcag cggcgcgaac
    26941 aggctctttt tccggtcccg gatacaggta cagcgtggcg tcaatctcat acgcaacaat
    27001 cacagcagat tgcaccgtga cccgatcagc taccgggcgc acgtcttcac cgttcagcgc
    27061 agcggccacg atggcgacca actcttggct tgcgctgccg ttgccctcgc gtgacagtac
    27121 cgacaccgtg acgctggccg gactggggct gataaccgac acatcggcca cacgcccgtc
    27181 ggcgctgcgt ccgtggtatt ggtaagcccc gactgacccg gcgacgctca agccctcaaa
    27241 tgactgttga atgcgcaggc gagaatcgct gtcagactcc atcagggcag gcgtgggcgg
    27301 caacgttgaa ttgtcagccg gggtaatgac caaacgtgac acgctgaaat ttgcgccgag
    27361 ctggtcgagg tcgccaccct gcgcaaacgc caccatcacg gcgcgtgctg cttcattgac
    27421 gcgctgccgc cacaagagtt cacgataggc attttcctgt aacagcttga cgagcggctc
    27481 tgattccagc gtcagcgtgc gggcgacggc ggcgcgctgg tcttccgggt agagcgacag
    27541 cagcatggct ttgcgctcgg tgtaaattgt ctcgtaatcc agctcttcca ccacggcagg
    27601 cgcgggaagc tggctcaaat caatcattgc catggtgtca gctcacaggg acagaaaggg
    27661 aaacggcgtt actgtcagcc agcacgcccg taatatcgac ggtcaggcga ccgtcaaagg
    27721 tgctcgacag gttgatgcct gtcagcgtga tacgcggctc ccagcgcagc agcgccatat
    27781 aacacgccgc cattacctgc aatttcacag cgggattttg tggctggtcg atcaacaccg
    27841 acagcagcga accgtaatca cgacgcatta cccgcgaccc gacgggcgtg atgagaatat
    27901 cgcgcacgct ctggcgaatg tgctcaaggt cgccgagggt ctggccgttg tcacgactca
    27961 tgccggaata ggttgtcatt ttgttcctac cgtccagccg ctgcccggca tgatgccgcc
    28021 gtgtccgtgg ttatccacct gtacgccgtt tgaggtaaac gcaccgccgc tatgttgaac
    28081 ggtgccgcgc atcgtgccgc ctttttgtac ttccagcgtt ccggtgatca acttgttggt
    28141 gcagaccact tcgggcgtgt ccagcgtgat gcgggttgac gccctcacgg tgaccagcgg
    28201 tacggtggca atgagggatt cagatgcggt gatatcggca gttttaatcc cgttgacggt
    28261 cagcgccccg gtagcgggtt cgtactcgat caccgcaccg tcgggaaaac tgacgtgata
    28321 cgcatcggca gacgctgacg gcgcaggatt ggcatcggaa tagatgcccg gcaagacaaa
    28381 ggcggtgtcc agttcgccgc cgatggacag gatcagcacc tgctcaccaa tggacggtgc
    28441 ccaccagtca cgggagcgtc cggcgcgtcg ggttaaccag ttcaaccagt cggtggtcat
    28501 gtctccggtt tgcacccggc acagggcatc tttcgtgttg acgtgggtca cgacgccgac
    28561 acggatcaga ttgcgcagta agcgctggat ttcagtaagg gtagcttgag ttttcataca
    28621 gatagaatga ttgtgttgag aaataacaac aatagattta cgatgtgtga cttctggcac
    28681 aaataaaacc aattagacga ttcaggatat tttcacgcta tgactcgaac tgacttgttg
    28741 aaattttatg agaaaatata ctttcatgaa gctgagttaa gggaaaaact ttatgtaaga
    28801 atccaaattg tttttgcttt ttatgttttt atagtgacga gtgcgatata tataatcaga
    28861 aatatcgatt attctggcgg ggctcttgca atagctgcgc ttattttatc tgtgatttgt
    28921 tgtattgtaa tggcggtgtc aattttctat ttgaaaaggg cgttttgggg aaatgaattt
    28981 aaggtaatat cgactccgga ggaaatatca aggcatctcg aaaacctcaa agaacataag
    29041 gtgaaattgg aagagtataa tgcgatgtat gcttacaata aacaaaaaat aatcaaccct
    29101 gaggatgggt tagataattt tatttttgaa aggcttcagc gttgctcatc acataacatg
    29161 ttaattaatg agtggcgctc atctcagatc catcagtctg tatattattt tttcttgtct
    29221 ctaattccac ttttattttc tgcggttgtt tttattggat ttgacttgga tttatcctca
    29281 tcacaaaaat ccaaaaaaac agagattata gtaataacca actcgaaatt aatttaaaga
    29341 gagggatata tgtgtgtaaa tgatagaaga actccgccac caccaccgct gtcaccacca
    29401 cctcctcctg aaaggtctgt taaagataat ggaactggcg ctagcattcc aagtgatact
    29461 aatcgaggaa atactagaag acctaataat aggggttctg attagttttt ttatggtgaa
    29521 tacaggggtg taatataaaa ataacactac gaatggtctg aagcatcatt tttaatactc
    29581 atgttcgccc cgctactaag cggggtttat tttatctact taaatatttt atcagtaatc
    29641 cctcaacttc ttttatctcc cgatcgctaa atcccagcag cggccttgcc tcatactgca
    29701 catcgtcgcc attgcggcta gggcgatcac gcaggccgta gtgatgtacc cgcgccatgc
    29761 gctgcactcg cccgataaat tccacgctgg ccgcatcggc cgtgcctttg gctttcaggt
    29821 attttgccgt gcgcagcttc tggaacatct ggcgcttcac ccggcctttt tttcctttaa
    29881 tcggctgggc tttacgcggg gcataggccg tgccgtccgg ggcagtctgc gccttgatgt
    29941 gctgttgctg gctaccgcgc agagcttttg ccaccgttcc ggccagcttt cgacggccag
    30001 acgccgacag gctggcgatc agcgcggcca gtttgtcgtc aaacggtttc agctcattca
    30061 tgccacgtac tcactaactc accgctgagg tacagcgata ccgggcgttc gacgggaaca
    30121 ggtaacggcg gctctggcgc gtgggtaacg tgcaatgcct tgtctacctc tttgacgatc
    30181 acccgctcgg tgagtttcag gctgatgctg atatcacagc taccgttatc gttaatgtca
    30241 gcgatgtagg taaagccttt gctgtcatga atgatatccg gctgattttc tcgtaaccac
    30301 gcctgaatcg gcactaataa ccagtcgata tcgtcagtaa aatccgtgat aaccagattc
    30361 agcgtgtact gattctcaaa cgacagcgac gcggccagcg tggacaccac cgcgccgctg
    30421 tcgataaata catgtagcat gtcgggatta tttttcagta ccggcaccgc gtcactcagg
    30481 gcgcggcgca ggctgttggg tttcagcatc gtgttgttcc tgacagtgtt tgatggtttc
    30541 tacctgtagc gcacagctca ccagtgcgcc ttccagttgg cgagtatcgg cgcttaaatc
    30601 accgttggtt tccgggctgc tgcccggtat cgggcagctc gttaccttcg gacagccaac
    30661 gtaaataagc gtcgggggtg tcaaaagcgg ggcggcggtg cagccgctta acatcgtcag
    30721 gcaaagcagt gccataccag cggcgcagat cggcattttc attgagtaac ctcatgattt
    30781 tgttatcacg ggacgcggcc agttgcccgg cctgtgacaa tttcgtgcgc agtgccgcct
    30841 gtgcttgttc attacgccgg gcggtgtcct gcaacgcatc gatcacccca tccctgaccc
    30901 gcagttcaag cgactgctta ttcagtctgt ctttctgctc gtcaatggtc ttttccgctt
    30961 cggacagttg ccctgtcgtc accattagga caatgaccaa cagcgcggca acaacaagaa
    31021 atatgcgatc gaatctcatg ctgccccctg aagacaaacg gcgcgctcac gctggcgacg
    31081 ggtttcaatg ccgcgtgata cctcgccgtt gacatacacc cagcgcaaga gctgatcaca
    31141 ggcgttgcgc cactggcctt tgttgataaa aaacgccagt gtagagcggc atgccgcacc
    31201 gacgccgaca ttaaacgcaa agctcacgat ggcgtcgtag acggcctgtg gcatatcaac
    31261 ggccatacag cgtgccagcg ccttttctac ccgcaacaca tcggcaacca gattgaccgc
    31321 cgcttcacgc tcagtgatgt tttttcccgg caccacgcct gcggtgtgtc ctattccgtt
    31381 tgtccacacg ttcgcgctgc actggtacgg acttaagcgg catccctcaa gatccgctat
    31441 cagtgccagc ccctcttgtg acgttttcag caaagaaaaa tccggcacca gcacggccag
    31501 cactaacacc gtggcaataa cgcaacgctt aacgagtgat ttcatggata acctcgcggg
    31561 gattatcgat agttttcaat aattggtagc ttttgcggcg gtagtaccag ttaacgccaa
    31621 cggtgaacac cacccccagc gccccgaaat aggctgcaaa atcctgtggc gtcatcgcgc
    31681 cgaaaaaggc caacgcgacg cttatccagt acgcgataaa cgacgtgatt ttttccatat
    31741 ttaatcccat aaactcaccg tttctgcgac aggggcggcg gcaatatccg gcagcgtaac
    31801 ggctgtgccg tggggcaaaa ttgccccgaa ttcagccaac cccggattag ccgctaacac
    31861 cgcctcaacg gcaccctgcg tgcgtccata atggcgataa cagagggcgt ccagcgtgtc
    31921 gccctgctgt gcgataacgt tcatcagata tgcccgatga tgcagcgggg cgcatcctgc
    31981 aactgactga tagcccagcg cgcatcgcgc cacagttcat caatcgtgcc gtcgagcgcg
    32041 tcggctttgc ggtcaccttt ggcgctggcg tcatagcccc ggtaacgctc gtacagcgtc
    32101 gccgtggtga tagagctgac cgcacgcagg tagtgatgat gtttttcgct ctggccgtcg
    32161 agctgctcgg cgggaacgtc tgccagcgtg gtaaaccctg cagcccattg cgcctttcgg
    32221 tactcgaaca gctcggcatt gacctcggca atggcggtta acgccgcatg gcgcagacgc
    32281 tccggcgtga cggtgttctc aaggcgcatc agcgtgcgca gggttcccgg ctctacatca
    32341 ggccagaaaa aggtgttttt gattacggca tcctgttgcg taggcacagg aataaccacc
    32401 gcatccgggc gtggctccgc tttcgcgggg aaaatcattg tcgtcatgac aacctcagaa
    32461 taggtgggcg gtggacactg gctcagaaaa cggataaccg ttaccggcct gtgtgccgcc
    32521 cggcgcgggg cgcgttgggt taactgctgg ccgctgcttt gcgcagcgcg gtttccagcc
    32581 gctctatgtc ttttttcaca ccgcttcggc tatcaagctg aaaggcgcgt ttcaggtgaa
    32641 acagggcgtg ctccggcttg ccgctgcgca agatcaggcc gatgattttg tgcagcttgg
    32701 cgcgcacctg gtcgggcatg tcttcggcgt cggtgagcgt cagtgtgtcg atcagcaggt
    32761 caatgttgac cgcctgcccg gcggtatggg cgcgggtcgc cgcgtcggcc acttcttcgg
    32821 ctaacaggta cggcgtcggc cgggtgtacc cctccggcat caccagcttg tgctggagtg
    32881 cataacgggc aatctccagc gcacccggaa cgtccccggc gtcgagcttc cacaccatga
    32941 ccgtcatcaa taccgcgtct tgtgcgccgc gcccgttggc gagcacaccc gccacccacg
    33001 gcgcatagct gggcaacaga ccgcttttca tttcggcttt acgctcgatg gagcgcacct
    33061 gttttaacgt gcgtttgtca gccgcaagcc ggaacagcat ttgctcgtat ccggtggcct
    33121 gtcgcagcgg atcattctcc cgctgcgacg cctcggcagc cgacactcgc atcatgtgac
    33181 gctgggcggg gcttagcatg gcttaagctc cggcgttatc ggttgaggtt tcagtacctg
    33241 acgcggcagg ctctgcggct ttttccgctt caggtggttc agggaactta ccgagctgga
    33301 tgttttcgat cacgcagcca cagccgtaat cttccacgat ataatcctgt ttaatggatt
    33361 cgtagttttc gatacggtca cgtttggcga cttcttcaat atggcgacgg tgactgtcgt
    33421 ccatgtagta gatagacagg ttatccagac gggtgatcat cagggcattg gccgggaagt
    33481 acggcacgcg cacggcaggc aggttgccga tacgcttctg gctgatgatg acgtcagcgg
    33541 ccagtatttc gctgttttcc tgctgcttgt tgaccagtgg gaaatactta tcggacagta
    33601 gctgacggcc acaaatcacc accaaatccg ggtcttcctg atgccattcg tcgatcatgg
    33661 tgttggtcgc atccatcacc agggcatcga ggctggcata atcgccgttc tcaccgacgc
    33721 ggatttgctc ggaaatcact gcgccgtctt cgcccacgac tttactcatc acacgtttgg
    33781 cagattcatt gcggtacttt tgcaaccagc ccaccgccac atcctgcaag agcggatttt
    33841 tagcacggtc agaggtcgcg gcacgcttca cgccgtgcca tccggccatg atgtaatcca
    33901 gcgactgacg tttggcgata gcgttacgca aacgcaactg gaaatcctga aaacgagccc
    33961 acaggtcaag ggtgttgtag cggatatgga aatcaaagtt catctgttcg cacttgtact
    34021 ggcgtgcttc cagactcagt aaatcggcgg tttcacgctc gtcaccgttt gaggtgtccg
    34081 tggtgctggc aactgacccg gacacgccga ggccgatctt ttccccggtc agctcggcaa
    34141 ccggcacgat gttgatgcgg gtcaggaagt cactggattc ctgcaccact tccatcagcg
    34201 actgcgtgac ggacggctca acgctgaatt tcttgctcag cgtttccacc tcaacgccat
    34261 tcagtgcggc aagctgggtc atgtaggcat taaatttaaa acgggtttct ttacgcattg
    34321 tttttcctgt tctttccgaa aaagggtatc gagggtcagc gccccggtta gcagttggtc
    34381 agcaacgagg cttcgccgtc gccacctgtc gccgccgggc ggcgcttttg cgacaagctc
    34441 tctgtgccgt ccagcgtggc tttgaggtcg cttaacttct gctcactggc actcagcttt
    34501 tgcgtcaggg tggcaacgtc ctgctgctgg cgctgctcaa gctgggtaaa tcgctgctca
    34561 acgccgtcgg cgttggtctg cacctgtccg gccacttcgg ccactgcctc atgcacatca
    34621 ttaaaacgag cgtcatcact ggactgctta cgtccaaaca aggctttcac gcgggttaac
    34681 agcgtcggct ctacgtccgg caggtcttca aactccagcg tcacttcggt agcgactgaa
    34741 aagaggtttt ccggggaaga tttgcgcata gccagcgggc tatgtttggc tttggcgctg
    34801 aactccagca tttccgtgcc gaggctggcc gggtcatcag tgaccgccag accggccaga
    34861 cagcttttcc ctgagttgct gaaattgggt tgaatttcca ttgaggtata gattttctgg
    34921 cgcgctttaa tcattgccac cagttcatct gtcgggtcga ttttggcaaa cagcgccagc
    34981 ttgccgttga gcacagaatc atcctcaatc ttctcggctt tcagctcgac cacatcgcca
    35041 tagcggcgaa acgggctgtc aggcagcaaa cctttaacgt gctcaatgtt gatgcggcag
    35101 ccatagacac gcggatcaaa tccttcgccc atctgttgaa tatcgtttgc gtcaatgatg
    35161 cgaccatcac aagtgtcgcc ctcgacaccg aaccacttag aaactttctt tgccattttc
    35221 tcatccgttg tttgcgggaa gtcggggcga gtatccggcg tggcactatg ccgcgccatc
    35281 aatcacggtt cgctaaccgc tggcacaaca ggcacttaag gcgggaatgg tcggcgctga
    35341 cgtagccttg ccgtcatgaa tacagccatc gataccacca tcatcagcga cccacggcga
    35401 caggcggctt tgctctactg gcagggcttt cggtgcgtca gattggggaa atgctgaacc
    35461 agaaaacgcc gaccgttcag agctggaagc agcgcgacgg ctgggacgct atcgccccgg
    35521 tatcgcgtgt tgaagccagt ctggaagcgc ggctgatcca gctcatcatg aagacgaaaa
    35581 aggaggggca tgactacaaa gaaatcgacc tgttaggccg tcagattgag cggctggcgc
    35641 gggtgaaccg ctacagccag acgggcaacg aggccgatct caatcccaac gtgcgcaacc
    35701 gcaacaaggg tgaacgtaag gcaccagaaa aaaatatgtt cagcgatgcg gtcatcgata
    35761 agctgaacga cattttcctg agtgagattt tcgagtacca gcgcggctgg catcaggccg
    35821 ggctacagca ccgtatccgc aatatcctga aatcgcgcca gattggggcg acgttctatt
    35881 ttgcgcgtga agcccttatc gatgcgctga ctaccgggcg taatcagatt ttcctgtcag
    35941 cgagtaaggc acaggctcac gtctttaaaa actacatcat cgattttgcc cgattggtcg
    36001 atgttgacct gaaaggcgat ccgatggtgc tgccgaacgg ggcgcgcctg ttcttcctcg
    36061 gtacaaacat tcgcaccgcg cagagctaca ccggaaatct gtatctggat gaatattttt
    36121 ggatacccaa gtttcaggaa ctgcgcaaag tcgccagcgg catgtcattg cacaaaaaat
    36181 ggcgctccac gtatttctcc acgccgtcga gtctggcgca cagtgcctac ccgttctggt
    36241 cgggtgagct gttcaacaag gggcgcagca acaaagccga tcacctccat ctggatttaa
    36301 gccatgccaa cctttccggc ggcgtgctgt gcggtgacgg ccagtggcgg cagattgtga
    36361 cggtagaaga tgcgttagcc gggggctgca acctgttcga ccttgaccag ctcacgctgg
    36421 agtacagccc ggcagagtat caaaacctgc tgatgtgtga gtttgtcgat gataaggctt
    36481 ccgtgtttcc gtttgaggaa ttgcagcgct gtatggtcga tgcgctggaa gagtgggagg
    36541 attttaaccc ctacgcgctg cgcccttttg cctataaacc tgtctggatt ggttacgacc
    36601 cgtcacacac gggcgacagc gcgggctgtg tggtactggc accgccgcag gcaccgggtg
    36661 gtaaatttcg catccttgag cgcttccagt ggaagggcat ggattttgcc gcacaggccg
    36721 acgctatcaa gctgctgacg gaaaaataca ttgttgaata catcggcatt gatgcaacgg
    36781 gcatcggtca gggggtttac cagcttgtgc gcggcttctt tccggcagcg cgtgaaatca
    36841 aatactcacc ggaaattaaa accgcgatgg tgctcaaggc aaaagacacg atcaccagtg
    36901 gacggctgga gtacgacacc agccacaccg acatcacgca atcgtttatg gccatacata
    36961 aaaccatgac ggccagcggt aaccgcacca cctatgaagc cagccgcagc gaggaaatta
    37021 gccacgccga cgtggcatgg gcaaccatgc acgcgctgtt aaacgaaccc ctgaccgcga
    37081 ttaacggtca tgtccctgtc agcattttgg attttaacga atgaaaaagc gtaagttccg
    37141 cccgtcaaca tcaacgtcag acaatgagcc gcagccgatg caggcattca ccttcggtga
    37201 gccgtccgcc gttctggatc gccgcgacat tctggactat gccgagtgta tccagaacgg
    37261 aaaatggatt gaaccgccga tcagctttag cggtctggct aaaagcctgc gcgccgcagt
    37321 acaccacagc tcacccatct acgtaaaacg taacattctg gtaagcacgt ttattccgca
    37381 cccactatta agtcagcaag actttagccg ctttgtactg gattacttag tatttggtaa
    37441 tgcgtttctg gaaaagcggc tgaacagggt aggggggtat tacggctgga gtccagcccg
    37501 gccaaatata cccggcgcgg ggtagaggat gatgtttact ggttcgtgca gtcattcaaa
    37561 gagccgcacc gctttgaacc gggtagcgtg tttcatctgc tggagccgga tatcaatcag
    37621 gaaatgtacg gcctgccgga atatatcagc tcgttaaatt cggcatggtt gaacgaatcg
    37681 gcgacgctgt tccggcgaaa gtattatcag aacggtgctc atgcaggtta catcatgtac
    37741 gtgaccgatg cggcacaaag tggcaccgac gtagacaagc tgcgcgccgc gatgagtaat
    37801 acaaaggggc tggggaattt taagaacctg ttcttctatg cgcctaacgg caagccggac
    37861 ggcatcaaga ttgtgccgct cagcgaagtg gcaaccaaag acgacttctt taacatcaag
    37921 aatgccagcc gtgatgatct gctcagcgcc caccgggtgc cgccgcagat gatggggatt
    37981 ataccgaata acacgggcgg ttttggggat gtggaaaagg cgagtcaggt gtttgtcagg
    38041 aacgagttgg tacctttaca ggaacggatg aaagagatta atgaatggat gaacgaagaa
    38101 attataaact ttaacgcata tgtgttttaa ttttgagatt cagttatgtc ataagccttt
    38161 ggatttcatg ggtaaagtcc tgaggctatt ttaaataatt cgatacgtaa ttatccatgt
    38221 tggcttgttt aagtattttg ctatttttaa tgtaatttaa attatcccat tcaaagtaac
    38281 tgcaaagtat aacaattatt gtgagtaatt tttcatctgt caaatttatt aataattcat
    38341 attgttcttc tctttcgttc tcttcgactt tatcattgat taatttaagg ggaagataaa
    38401 atcttctggc taaagaaaaa aaatggtcat ctacatccaa gtcctcaagc cattcacaaa
    38461 ttctctcttt ccctatacct ccattaacta ataaacttaa gctgtcgtcg atgtaagtaa
    38521 ctgcattgcc agatttgtat tgaataagtg atgtttcttt gggggtgttt tcatgctgta
    38581 attcatcatt gtgaggggta tcatcgatcg caatacgtaa tttatcaaaa ttagattctt
    38641 gagcttcgat taaactaaaa aaacgcattt caaatttttt ataattttct agtttctcct
    38701 gtctctttaa ttcatgcatt aaagcctgat tcgactgcaa ctgtaatcta acagagtgta
    38761 ttaataagca tatggagata aaactcagga tgggatttaa taccccaccc ataaaatcac
    38821 caaattgccc ccatacgtct gcaccttgtg tactaaggta acttactcca aagtttaagg
    38881 aatacaatcc ccaaacaact ataatcaacg ctaaacataa agtctttaac atcttattgt
    38941 accgtatgaa ctagatattt tattgtttcg ccgctgttaa ttctgactcg gctaactgtt
    39001 agcttaagat aaatacgccc ttcggaagat ggagagttat ttacatgtaa attttctgag
    39061 atcattttct tttgacttga cataattata cgtagaggac tataaaagcc aaaagcaact
    39121 gtttcatctt ctccttcaag tacgagtctt ccattaccag ttctagcatt gaatctcgtt
    39181 atgtaagctc taatttcctc tgtttttttt gctacctttg acttaaagag gtttgttgca
    39241 gtagccgtgt ctaattcaat aactttcttt ttgtcatgcg ctctttgttt gaaattaagt
    39301 tctatgttgt aatttttttt gacatttatc tcatgcatcc tttttaaggg cgctcttatt
    39361 cttcctatta actcatcttc aatatctgac aagcctttga caacttcttc tgcttcatta
    39421 gataattctc gcgtttctaa ataaagagat tgtgagataa aaaaactcat cacttcatta
    39481 aaaacaggtt tggatattct atgaagttca taaattaatt caggctcatt aatcactaag
    39541 tcaaagttct gcccataaga acctgtaaaa ttctttttta gtacagctcg tgcaggattt
    39601 acatgtgtac gtcttttgat gattactttc cttagaatag cctcagccaa aagacaagta
    39661 acttcagctg ttccgccgag agttgctatg ccatattcca tatcaacttc atcatcaccg
    39721 cttttgatta tgacatcgta attaacacgc attacctttc cttgtgaaag ttgattgcac
    39781 aaaaaattaa gattaatctc actctagcat ggcatgctat gtctttgaac atttaacctt
    39841 taaatttgat aacgtgcgca atgctatccc cgccacgcct gcccgctttg tgtgtcgctt
    39901 ttcatgcact cgcgcgatcc gcgccagcta tggcgttaac ggggataaat tgggcttaga
    39961 tcatcatgca aaatcatgcg ggttatgcat gcatggctaa aagacggcat cctctaatcg
    40021 ttttttcagg tattcgacca gttccgactt gtcactaatc tctcgatact ctctggtttc
    40081 tatcgtgccg ttcgccaaat ccgcaatgat tgacatcgcg gtttttaatt cgtctacatc
    40141 gcactgagcc actaacgata tgtcggcgat taactgaacc cgcgacaaaa cggcctgtat
    40201 gtgttccgtg ttttccaagg ggtgccattt ccttattttt actgtattca tatacagtat
    40261 tttacatatt gaaattttcg tcaatcactt agtgtgctac gggtgactga ttggttatgt
    40321 gttcatcgct ataaaatcgg cgtgacatgt cactaaaaca tttcacgccg atacattcac
    40381 agaattaact ttaaatcatg ccagccttgc gtattccaga actcagatgc accagacagg
    40441 cagcactcgg aaacgggtaa tttctcccag catttctgac atttacgctg gcttaactcc
    40501 gctatttttt gctgtagggc tgcggcatcc tgacgaatta acgtggtcag gtactcgtca
    40561 atatcatacg gctcacgccc cggacgacgc agggcgcagt tgcgcttaag catatccagc
    40621 tcttgcgcat caacatgtat ctcgattttc accacgccag catcacgttg tcgtgcgcgc
    40681 tgggcggctt tacgatcggc gggggattta ggcatcactc ccctcacttt ttagcaacgc
    40741 tgaatctatg cgcctctggc tatctctgac cgcctcagaa caactaacca gctcatctgg
    40801 tgtaagattt tctttaacca tgatgtcctg taaacgttga attaccccgg ctaatttcag
    40861 gtggcgcagc gtgaacttag gaatttctcg cgttaactgg tgcatcactc ccccttatag
    40921 tctggtaatt cagtgatata aagcgccttt gtccggccag ccgcaccgca tgcctcacaa
    40981 atcacggtcg aatattcgct aggggtgtat tggtagccat taaacgccga atgattgcag
    41041 tatctctgcg tgacaaacca ttgacgttct gcaatcggct tctttcgttc gacacattta
    41101 cacctgaaag aaacagccat tgtgttaaac ctccatctga ttactaaacc ccggccactc
    41161 atcagccgcc gggtatgaaa taagttcgcc gtctatcttc atttttgccc cacgcgccag
    41221 cgcttccagc tcccagcatt gaacgctgat accacgctgg gacaaatcaa tctggatacg
    41281 aggtatccgc tcccgttaat ctggccgacg gtgacggatc gcggaggcta ttggggttaa
    41341 agtcgcgttg cttatgattc ttcctgacgg attgctcacg cagacgcatt cctagcgccc
    41401 tcacagccgc gtcgtcattc cagtcaatcg gtgggttatc ggtttctgat gtcgtcgcta
    41461 tgccgctgtt ttcggcctgc gttttgacat ttgcgcctga ccgttgagaa cccaacccac
    41521 agttattgac aggactccga ggcgcgccag aggcgctttt taaagtcaaa ggctcaaggt
    41581 caacggcttt agaaacgatg cgccattcgg ttgtccgggt ttcaaataca tgaccgtcac
    41641 ccaaatgcgg ggagaaaatc ccgaccactt tttgcacctc ttcgtcatac tcgttgagct
    41701 tgtctgatac ccggcgcgca acacgcaccg tttgcagttc gcgggaaaca ttcgcgccac
    41761 cttgtgcggc catgtatgcg gcaaagtcgc cagcgtcggc agcaaagcga accgcttcga
    41821 cctgttcgtc aaactggtca gtaaggttga cgctgcgtaa cgtgccgctc cggcactcgc
    41881 ggtaagcgcc catcgtggga acaccgatag gtttaaattg ggggatacgc cacgttgatg
    41941 cccacgcagt gacggcggcg gcgacatcac gcagcggctt tccggtttcg tcgtccagtt
    42001 ggccgtcgag cgcataccca tcgatattct tggcgatgta cttagcgata tagccagcgg
    42061 caccgccctt attgaggtgt ttacattcaa agcggtactt agccgcgccg cgctcgtcgc
    42121 cgtcttcttt cagggcgtag cgacgcataa tgtcgatgac ggactgacga tgtgcgcgtt
    42181 tgcaaaacag catcatgtgc cagtgtggcg tcccgtcgtg atgaggttca acaacacgca
    42241 tcccgtaaac tttcaggcca ttatctttaa acgctgtgcg catcttgctg aatatgctga
    42301 ccagatagcg ctggccgtct ttgggcgtaa aggcttcatt gtcccaattc cggttaaact
    42361 ggactgtctc gttttcgccc ttgccgatca cgcgggtcgg gtgatacttc gacggggtag
    42421 tgatagtgat aaacatcccg acatctttgt gttcgctggc gtaacgttct atcccggcga
    42481 ttgtgctcat cagctccata cgacgaattt ccgggttaga aatactcgcc atcaccttgt
    42541 cgatcaggtc gatgcgttca cccgttgcga cgttctccag ctcacaactt ttcaggtaat
    42601 ccatattggc gaggcgacgc gcctgtacat cgcggatcgc cattttgctg gcatacggtg
    42661 acgccttttt actgacctga ccgacggcaa tcatcagcgc ctcgcgccag cgtgtgcgct
    42721 gagctttaag ctggcgcacc caccattctt cattagtcat tcggcgcagg ctggctattg
    42781 ctttgcgtat attcagcgtg cctttgcggt agttcttcca gaaaagcggg gttatgttga
    42841 acgcacgcgc catgctggcg acatggccga aaagctcggc ctgtgccgca tcggtaaaga
    42901 gcgcatcacg ctggccgccg cgctccgctt tcatggcatc gctcatttct tcatacgccg
    42961 aaaatatctg gccggaaata cgtgcagcca gacgccccag cgctttgcca ttcataccgg
    43021 gcaacgtttg ataattgtca tattcagaca ggaaacgctc ggaagcatgg cgattcatgg
    43081 cgtggcgggt attgattgcc tcgatacgcg gccacatgcg ctgcataaag ctgttaacca
    43141 gaaaacgatt agcgctgagc tggcctttgt tctttttcag gtaaacgtag cggttcaggc
    43201 agatttcacg caggaagtga ggctgttggt taattttggc taaaacggct tgcccctgag
    43261 tccattcctc acgggtaagc tgcctttctt ctggcacgat ggccgggcgc ggggcgttcc
    43321 acggatacgc acccacgaac gcctcgcggg tgctaccggg gaaaggtaac ggtggagtgg
    43381 gagctgagcg ccccctatgg gtaacgctca ttcacaaata ccagcgtaaa cgctgctgca
    43441 cacggccttg tcattcatgc cagcaaacag atcaaactgg ttgccgccgc gagaggtcaa
    43501 cgcccagtct ctataggttt caataccgtg tgattcaacg ctgatgaatt caatacggcg
    43561 ttcggcctta cgtgggtctt gagttgaagg gaagtacgta ctgttaccgc gacgcgaaca
    43621 ggcggcgacc agtcgctccc attcagccac acgcgctatc tcttcaggcc agcggctaaa
    43681 tatttccgct aactcagatt ttcgcgcatg gatacagggc atacagccta ctcgactgca
    43741 tccctgctga tagagtggat tgggtttaat accgtgacgg cgtgctaatg caaacacatc
    43801 ggcatgagtc catttgagta tcgggcggta aacgtgtagc cccggagtat tatctgcgtc
    43861 tgtttcccat tctggcagca atgcgcgcgc tggggactct tccgcccgca caccttgcca
    43921 actgataacc tcatcatatt cagccagtag cggcatgacg atctgatcac gaataggcgc
    43981 gtgctttagg tcaaaagtac aaaaccgggc tttggtggaa gggaaacggc ctttccacat
    44041 acacaggtca agaaagggga ttcccgttgg atgaagaata tcaagcgcac gggcaaccgt
    44101 tgcggcggcc tgtgaatccg tcataccgca ttcagttacc aacgtgacag gccagcgctc
    44161 agcaatgaat ttacgtttta ctgctatacg gtcatcaaac gacgccttaa ctctgcgtat
    44221 ttcccccagc ttggattcca gataatccag ataatccatt gtctgcgggt gttcgtgtcc
    44281 cgtatcagca aaagcacgga tagttgttac tccagcctca atagccaaca gccattgcgc
    44341 cagcgaatct ttaccgccag agactgaatt aatgttgatg gcatcggcag aaaagcagcg
    44401 tgtatcgatg acggtattca cagcccaccc cgataatgct tacctttcag ttcgtgaatg
    44461 ccctgacagg tcgcgcagcg ggtcacgccg tcgattgcag cgcggcgcgc ttcgggtatc
    44521 ggttgatcgc agtcttcaca ctcgaacgca gaaacgccgc gttgggcgtt ccgggcgctg
    44581 gcgatctgat ggtctaacat ttcctgttgg cgctgctgca ccatgtccat agcatccggc
    44641 attattcttg ctccttatcg ttgttgagct ggtcaaaggc tgattggcac atcgccgcaa
    44701 agcgtttgct ttcggtcagc agtttctttg agtcggtgac attcccgcgc caaatttcag
    44761 tggcgatagc acgatgcaca aaatcgttaa tgaggctgac ggggttctga taaacagcca
    44821 gcgtggataa ataaggctgg tcaccatctt ctttcccgca tttaatttcg cccagcgcaa
    44881 agtcatagcc aactttcgct attgcataat tgccgttgat atcgacgcgg ttataagctg
    44941 ggttttccat tacatcaccg ccttgatatc tgacccggaa tgattaaagg cgtcggattc
    45001 ctgccgtaat aactcgatga tttccacgct gcttaattca tggatagcag catgagtcgc
    45061 cagtgtgtcc agacgagaag aaaatgacgt gtgcgcatcg gctttcgcct cggtgcgtgc
    45121 ctgagaaagc attaactgaa tgccctcgtt ttcagccttg cggcgtattt cctgacctac
    45181 tgttttatac atgtgcatat aatcctcaga taaagggatt cccgacgcag ttaagcgcct
    45241 aattaatttc aggtggttat ttaattcaga tattcttcgg gtttaattgc cgtcaggata
    45301 tcgggggcgg cttcaaacaa gctgaatagc tcatttaagg catgtgatat tttatttcgc
    45361 cacggacatg aaacatcatc aatccgccag taagccgacc agcgacaaat aacgcacacc
    45421 cgcgttgata ctctcgatca cgttatgacg acgcgctggc gtcatgcgct catcggatac
    45481 gctttcagca gcaaccgcgc ccactgcggc ggtggcctgc aatacatacg tggttagacg
    45541 ttctgccttt gcctcattca ctggcacggc tggcaggcaa ttaagctgcg ccaaaagccc
    45601 atcgatcagc gtggcgtctt cggttacatc ggtgattgcc agcagctcgt cacacgtcag
    45661 cttgtgtggc tggtctgggt taagtttgtt acgcagcatt tgagcgttca tgccgatgct
    45721 tgcggctaca tcaaccagat tctgcttgtt agcaaacgca cgacaggcat tgttgaagtg
    45781 cggatgtttt gcaatttcgt aatcaaacat ggttcagctc ctttgaaatt cgaataatcg
    45841 aattcatggt ttgatgtaac ggcacttgat ggcgtgctga cggttctttt cccgccatgc
    45901 ctcaaggttg attaatgcgt tgccgtgttt agtcatgacg gaatggccga caacttcacc
    45961 tgtcgtttta tctttcttag cgcgctttac ggtgctggtt ggtgtcggtg ccagcagtac
    46021 aacgccgtta gcgatccatt tttccagtaa agaattactt atgttattga ttctcgcgaa
    46081 ttctttcttt gtcatggttg gtgccatttg cacggctgca acctgttcga tagcgtcttt
    46141 gatgacgcgg ttgacttctg gtgtcagtgc tttgaccagc tcagcaacca gtgcgggact
    46201 gattgcagaa tcaaatcgtg gggatgcatt tgcaatctcc tgagacataa cgcaatatct
    46261 cctgttagtc ggtttgtgtt ctatggtgtt gcatgtggtg tgtacgcact atagatcacg
    46321 tggtgtgtat gtataaatgc tcatggggtg tatttttgga aggtaatgat tctttacagg
    46381 aagccccttc tgttttgcag agggttttat ctagctatgg tgcgaagact cagaaagagc
    46441 ttagcgacct aacctcaatt ccaacaaata ctataagtaa ttggattaaa agaaataata
    46501 tccctagcaa tgtcatcttg atgtgtgcag tagatacggg agctgatgcg cgatggttag
    46561 ttacaggtga gtttgaaaat tcgaatttga aaataccgcc agtaacgcta aaaggtaaag
    46621 cgctttatga ccaggttctg gcatcaggtg gcaaagccgt tctgcgcagg atgctggatg
    46681 cctatggttt cagcacacaa aaagagcttg gtgacttgct ggggatttca acggctacga
    46741 tcagcacatg gattcgccgt gatttctttc ccggcgatgt cgttattgct tgcgcgttgg
    46801 atactggcgt ttctcttgag tggctggcga cagggcgggg tatcacaaat gtaggacagg
    46861 ggattgccgt tgatgcaccg gaaactatta ccgttgctaa gaaacgcctg ctggctggta
    46921 aattggaaga cgatggtttt tgttctatcg acaaatcatt tttacctgag ggcgttactc
    46981 aagaaaaatt atgctacata cgctcaggta aagacgcttg gctcgtagaa atgggtgagg
    47041 gcgaagtatc taacggtaca tggcttttag atattgatgg aagtttggat gtgtattcag
    47101 tgtctcgccg tccgagtaaa ttaattgtta atggacgtga tggtgagttc gaatgcaccg
    47161 ttgatgaagt agttgtaaag ggtatcgtta ctattatttt taaaacagca atataaggat
    47221 tatattatca tggatatgag ctttgtttat ataaatgctc aaagaattat cagtgcatat
    47281 tctgtatctc aagtcagtga aagtgaggaa cactttcaag gaatatgcca ccactctaat
    47341 cagttaagaa cctttagaaa agataggttg atagaaaacc tcccatctta tgaagaagcg
    47401 gtaaaggttg ccgccatcat agatgcatca cagtatctac atctttttca gaagcctaaa
    47461 gctaatcttt tcgaagtttt ttttaccggt tttaaaaaag cagataaaga tcggttggtg
    47521 agtttagcaa cagaaaataa aatttcggta agaaattctg tcacgcagaa tcttcaagtg
    47581 ctctgctgtg ggtacaatgc aggaccaaca aaagttaccg cagcgaggat gaaaggagtt
    47641 ctcattttag atgaagaaca gtttttgaat atggttagta ctggtgaagt gcctgatttt
    47701 taaatcatag gataaaaaga gtattaaatg aaaagtatat tatttttgat tcttgttgtt
    47761 ctgtcttcaa gttcaattgc tgctgatgaa atatctggcg ctaatgatgt tcggcatccg
    47821 gttgcctcga tggatactca gtctaatata gcaacgcctg cttattatga tgatgagaaa
    47881 aatctagcta aattagctga gaaaatatca tccttaaaca aagataaacg agatgcactg
    47941 gaaatattag agaaagtaga ctctttttat tcaaaatctt tttacaactt attaatgcta
    48001 atactcgcgc tgacgagtat agttgggttg cttatcccga taataatatc agcttaccaa
    48061 actaaattac ttaaagggca aacgatcaat ttgcaacaaa ccataactaa tgaagtggca
    48121 tctaaattgt cggaactaaa ggaaactctc tatgctgaca atgaaaagaa aatgttagaa
    48181 ttagagggtg atgtaaagaa aattatcgaa aaaatggaag ctgaatataa agttgaaata
    48241 aaaaacctta gagctgaaag tcttgccagg atcaatcatg ttagtgccgc tacttgtttt
    48301 gttaataaag agtacggaac agcggctaaa ttttatttta gagctgcttt aaattatatg
    48361 aaatataata accattctgg aataagaaat gtgactaatt ttcttataaa aaatgttatg
    48421 gctaaaatcc catcagatca tgagaccccg cagctcgatg aaaggtacaa taaattcata
    48481 aaagaactat catcatttaa cactgaatca atatataatg acgctatttc tgagttgaaa
    48541 tcagcttggg atgattttga aaaaagagca aagagaagta agtaatgata aaaattatag
    48601 ctttttcttt ttttttatta atgcgacgcc tttcccttct ttcagattaa attcattttt
    48661 agccaagcaa gagttatcta tagatctatg aatttcaccg aatagtaaca tttcaagtgc
    48721 tgcactgata agtattttta ccaatctcag gcgtctgtaa attgaatggg cataaaggag
    48781 tatatccatg gagtatcaaa gtatccgtct aaatgtgaat gaaggttttc agaaattatg
    48841 cgccaagcat gacttaacgt taagcaaaac ggaatgtttc agcgccagca caacgatgaa
    48901 agatatcatc gattttgtgt atcaagtgaa agacgctaac gtacaccttg ctttgctggc
    48961 ctatattgct gtcgagtggc tgaaaggtag aaaaggccgg aaaattcaca tcgcaattga
    49021 aaatgaaaaa ctcaaagaga tcaccgcaga gaatgtgagt aaggaagagc tggaaagcat
    49081 tctcaccaaa acagtggctt tgtttacaaa tgagtcagag taacgctggc ttttaccgtt
    49141 ccatcggcca acgtattgct tcaggctatg cgttggcttg tttgtgatgt gtcgcgatac
    49201 tgtcgccaag ggtgtgttta agtgtttgat tttaatgatg ttgatgagta ttcagtcttt
    49261 ttttatatca ttgattttta actatttatt ttttatatcc acgaaaatcc acgaaaatcg
    49321 atatacggtc ttttatagat aggtgtattc cttcccgcga gtatccagat atttctctgt
    49381 cattcttact tatttatgtc ccagtagttt ctgtgcaaac tcctttcccc gttctttctc
    49441 atacaacctg ccagcgagac ttcttatctc atggaatgtc ggcggcttct catctagttc
    49501 aatccctgat tcctttctgg cttggacaag tcttttggtt agcccgttga gttctacgga
    49561 tccgcttggg ttgttttttc taatgccgac actaatcatg taatccgttt tgctggaatc
    49621 acggcattga tcaatcacat cggacagagg acagacgcag cccaacctgc ttcggcgggt
    49681 ttttgctttt gtacaacagt cctccctgat aaaatcttaa aaaatggagg aagtatatta
    49741 tgacgaattg gggattaggg gctttagttg caggggtagt ctggcttatc gtgtcattta
    49801 atatgagtac atccatagtg atagacggta aacttgtcac gaatgttttt ttgatcgctg
    49861 ctcgtgaaag tcagatgaat atgggttggg tgttagtcgt agtcgggggc gttttcacgc
    49921 tcttgggagt ggctagaaaa cggtatacca ataaacaccg tgaaccctga aagcacagtt
    49981 ataatagcta gggagcatta tgcgtatttg ggattactgt gtgatagctg ccatttttct
    50041 ctgtggtatc gttatgatag tagagtctat catttacgtt cgtagagggg tttatacaaa
    50101 gacttttaaa ggcgtcagtc ggcgcgagta tattcatagg aatgaaaggc cagatgtata
    50161 ctggttacat gtgatttgtc atttcagtgc gggtatcgcg atgatttata tttttttctg
    50221 gattttttat cctttttcca tatgactacg ttatcttatt ttaatatctt atcaataggg
    50281 gcaaggatgt gagtatacag attttatttc tgtcggtgtt ttcgttttcg gtaatggctg
    50341 aggttgagaa agaaaaatga ggtcactcat ttggaaaaga taaattcgac ggatttcata
    50401 tagagaatgc aaccaccgat aatggaattg caaagataca attacaaaga cgtgttggta
    50461 tgttttcact gaatttgttc atgtatggta gtaagttttc ttgcgaagat gtccaaacga
    50521 cagaacctca gaaacccgcc attggtgcgg tttttttgtt caagtgatta cgcttctttt
    50581 gcgttcgctg tgtaaattaa cagataacta ttagcaacat aacgctggta tcatttacac
    50641 tctatttatg gatgtgtgaa acactggagc gtgtatgaaa tcggttttat cgtttgttgt
    50701 cgctatttta atttcctttt cctcttatgc ttctgatttg actgaagacc aaggattatc
    50761 tggtttaatt tggtcaaaaa aatccaacaa agaagcgatc caattaatca acaagaatcc
    50821 tgagttaatc aattcaagga ctggtgctgg gttcactccg ttgcacttag ccgggatgat
    50881 tgggaacaaa gaaattgcca tatttcttct ggagaaaggg gcggatgtta atgctgttaa
    50941 tgacgatggg tatagtcctt tagtggtaac tatagctaac ggcaatcagg atatagcaga
    51001 cattttgata aagaacggtg gcaaggaact aagactttaa cgtcgcaaat aaaaatcatt
    51061 tccaggctcg ctttggcgat tctttttctt tttattgcaa agggattgac gttaagatgc
    51121 gaaaaatcat agtgttagta ctggctttac cattgacatc atttgctgcc attaatgata
    51181 tcaacaaagc cgcacatgaa atctgcctga ctgagtggaa tattacggac aaggtgggat
    51241 caacggatag agatgtgctg gcaatcgtca atgaagaggt atccgacttc aaagaacgtg
    51301 gttttagcct ttcagatttc ggtattgatg agccggaata cattgctaca tcggctagga
    51361 ttgccgaatc atttcgtaaa gatcatcgtc ctcctaatcg acaatatgac gatgatataa
    51421 gggatacact cagagagttg gtggttcctc gttgtgtgat aaaagtaaaa gagagtttaa
    51481 ctaaccatta agctattgcg gtacaaaaaa tacgggctgc gctaacgcgt tgcctttttt
    51541 tatttccttg atccgcgaac aaagatctat gtaggcaggc gaacctgtga gggtcttttg
    51601 accaaagaga tcctcagatg tctaaacaag cagtttatag ggagcgccag tggtggggtg
    51661 tgtaagttct tagtttcggt cgatggccga gatgtggcac tattacaaca aaatcaattt
    51721 gtaactgctt atttgaagaa tgggctgcat aaactcatgg tcagcaatga gtgcaatgtc
    51781 ctttcaatgg gaatgagaaa gaccgttgat gttatcgcga atggaaacga acaagagtat
    51841 gtcacagagg tgggcttctg ggggcaatac gggttgtggc aaactaaata aa
//
